# Supplementary material for: Sunflower Hybrids and Inbred Lines Adopt Different Physiological Strategies and Proteome Responses to Cope with Water Deficit
Source: MDPI journal article supplement (doi:10.3390/biom13071110), 2023-07-12

HanXRQChr10g0283531  
 Probable ribulose biphosphate  
 carboxylase large chain

Parents WW  
 Parents WD  
 Hybrids WW  
 Hybrids WD

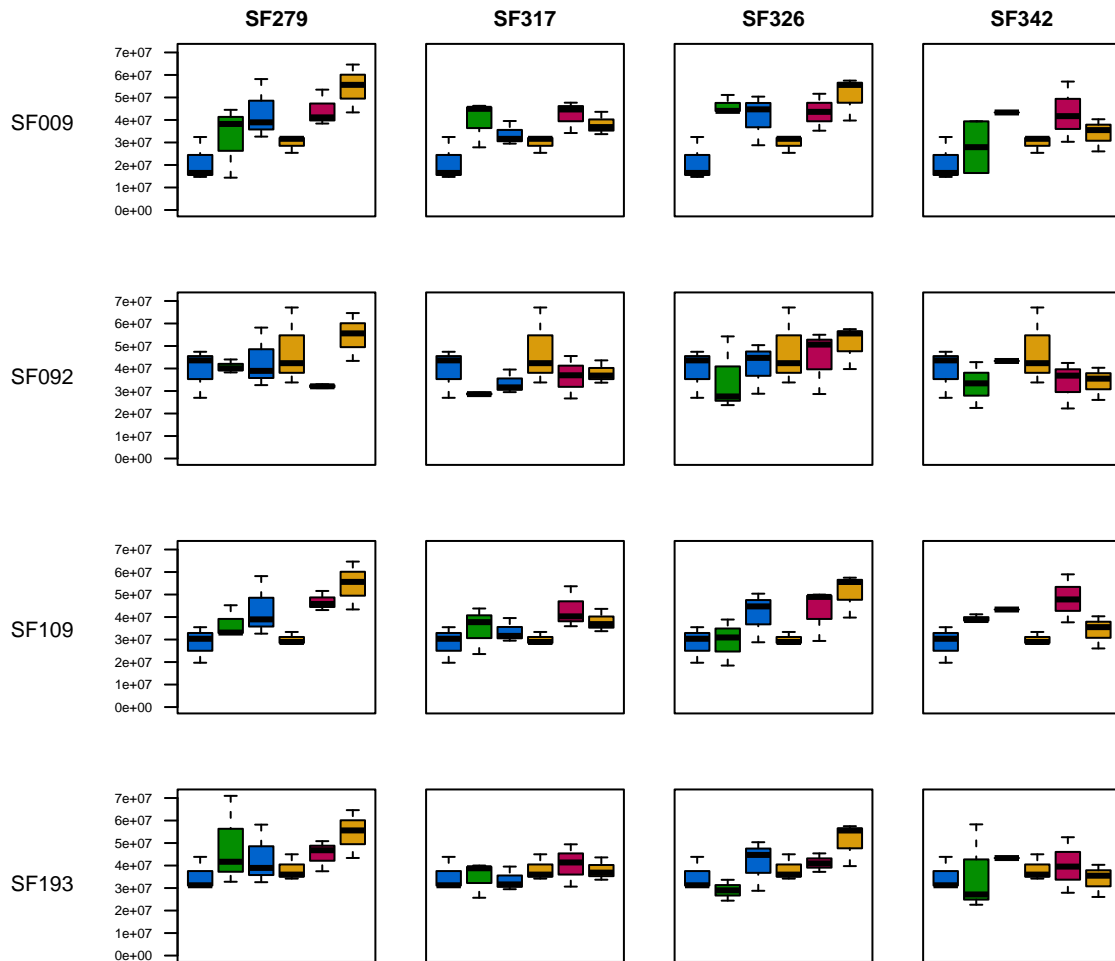

HanXRQChr14g0453141  
 Putative glycoside hydrolase family 3  
 C-terminal domain; Glycoside hydrolase su

Parents WW  
 Parents WD  
 Hybrids WW  
 Hybrids WD

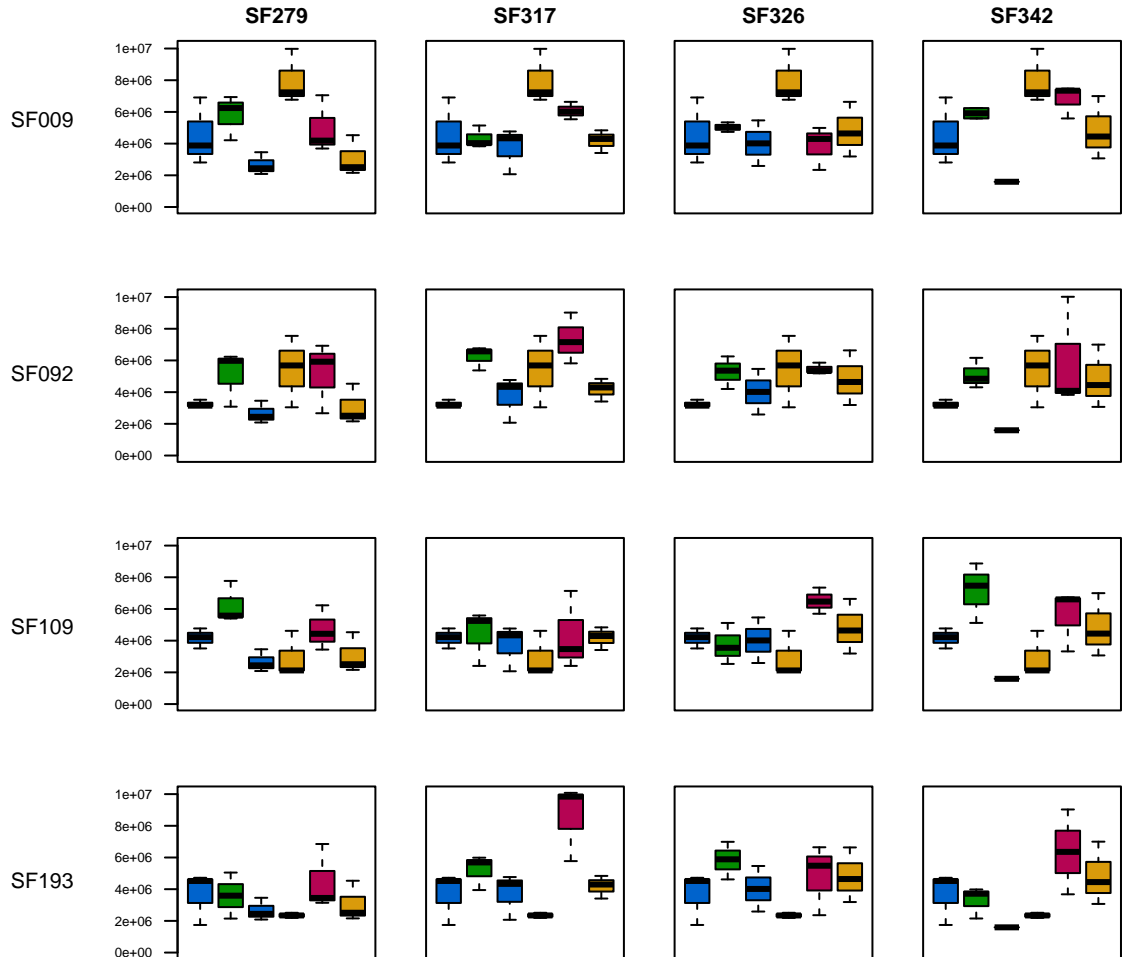

HanXRQChr14g0437901  
Probable eukaryotic aspartyl protease  
family protein

Parents WW  
Parents WD  
Hybrids WW  
Hybrids WD

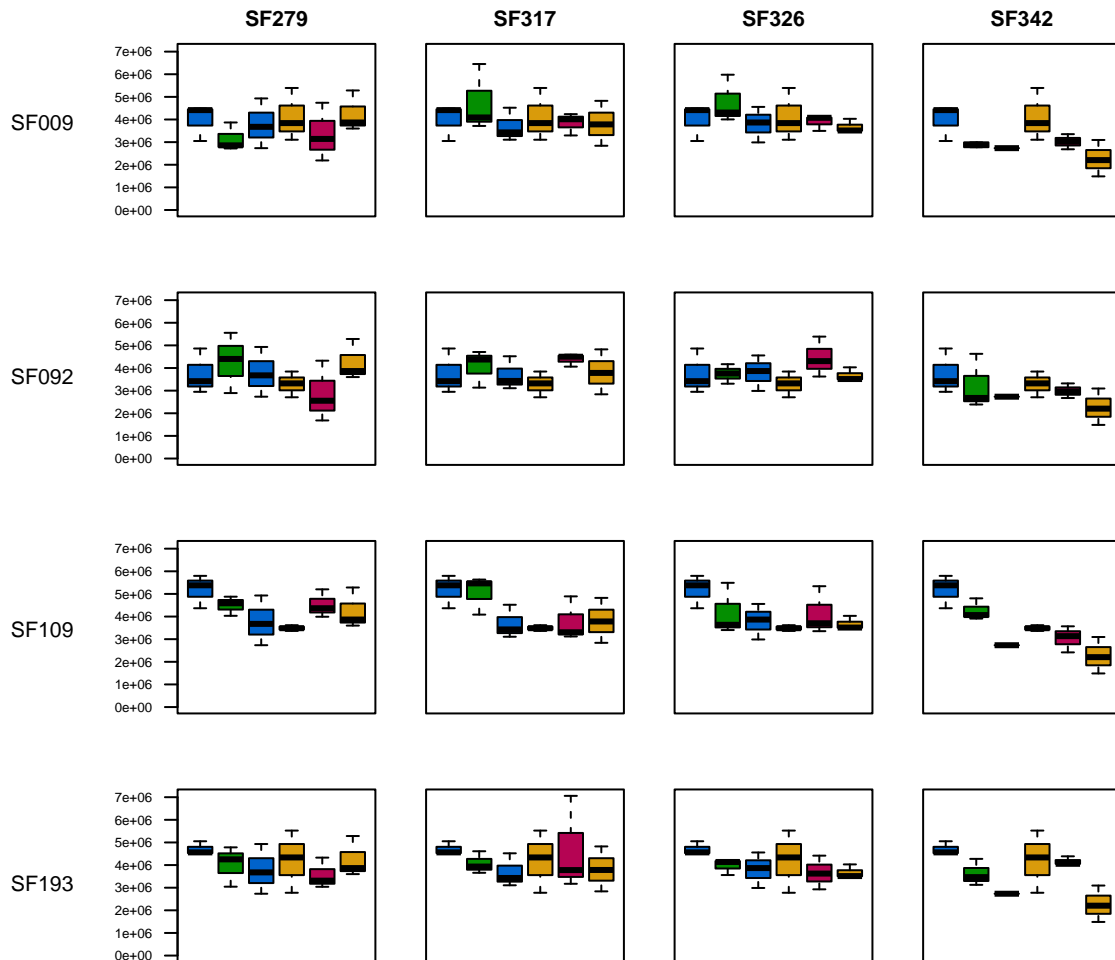

HanXRQChr01g0021491  
Putative pyruvate kinase; Pyruvate  
kinase, barrel

Parents WW  
Parents WD  
Hybrids WW  
Hybrids WD

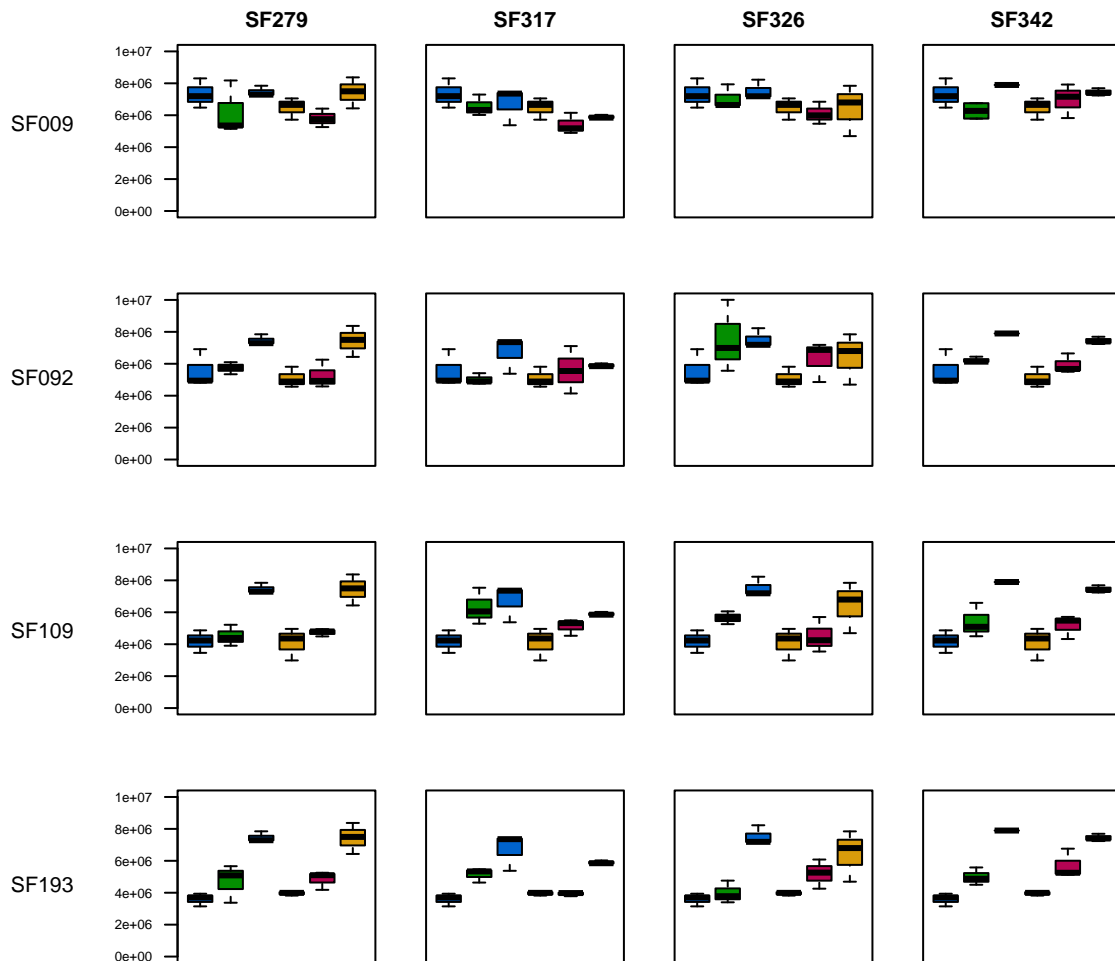



HanXRQChr16g0528551  
Putative heat shock protein Hsp90  
family; DNA mismatch repair protein family

Parents WW  
Parents WD  
Hybrids WW  
Hybrids WD

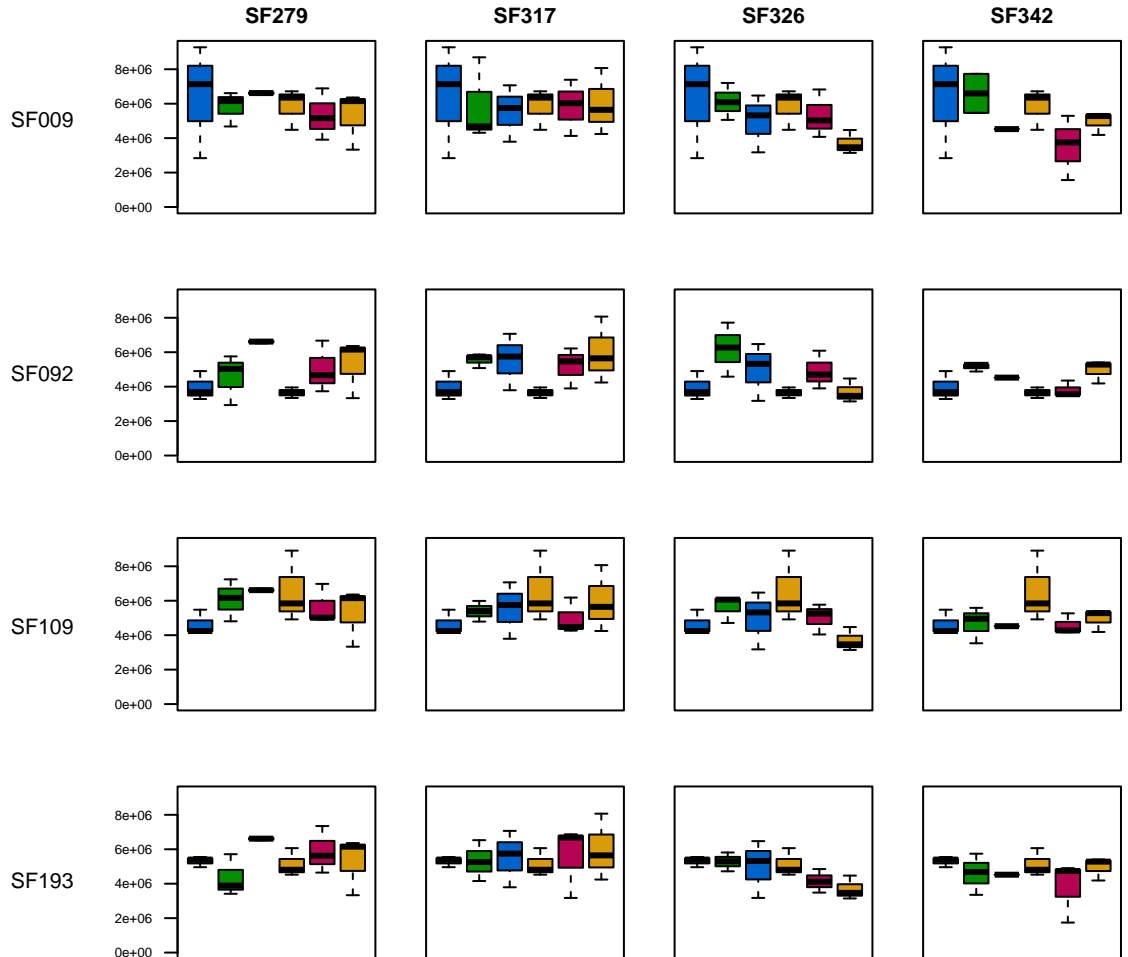

HanXRQChr14g0447981  
Probable 6-phosphogluconate  
dehydrogenase family protein

Parents WW  
Parents WD  
Hybrids WW  
Hybrids WD

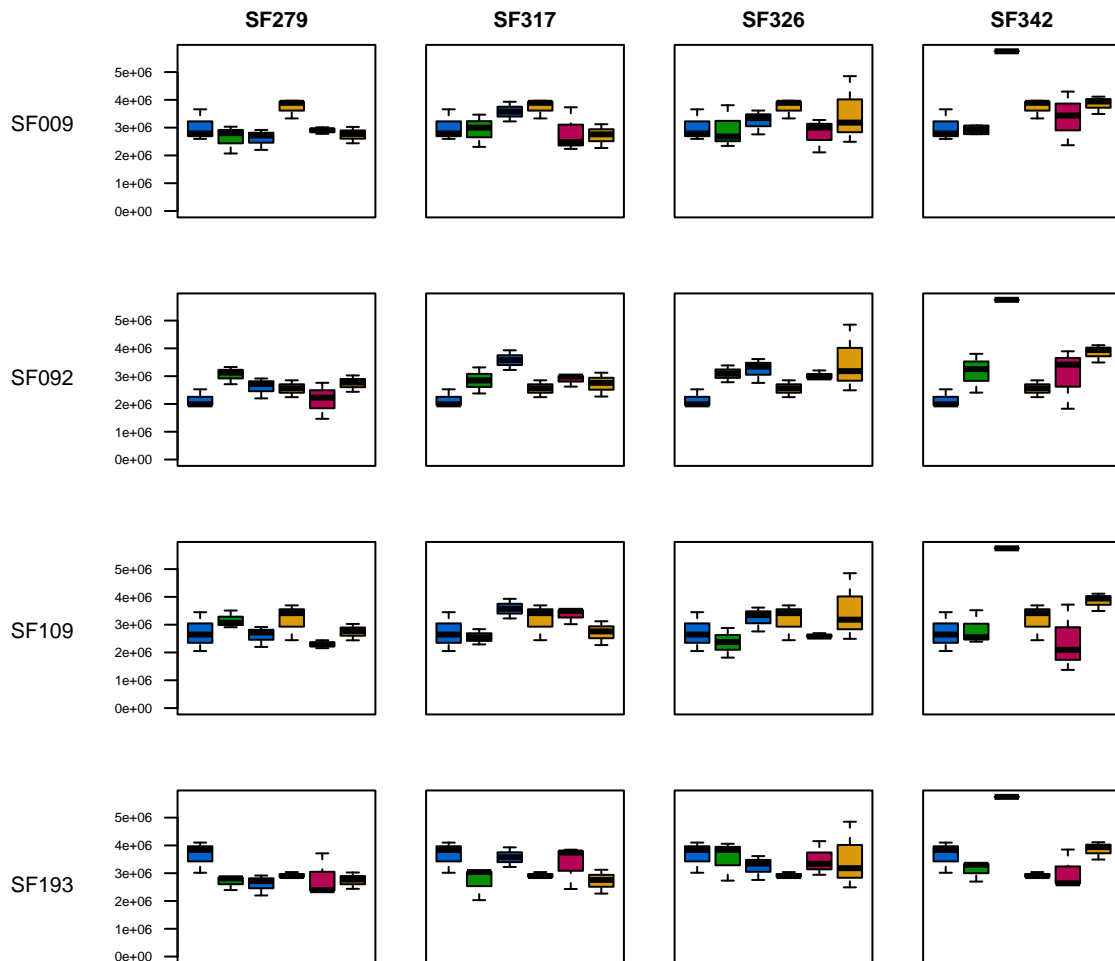

HanXRQChr17g0536341  
Probable protein TIC 55, chloroplastic

Parents WW  
Parents WD  
Hybrids WW  
Hybrids WD

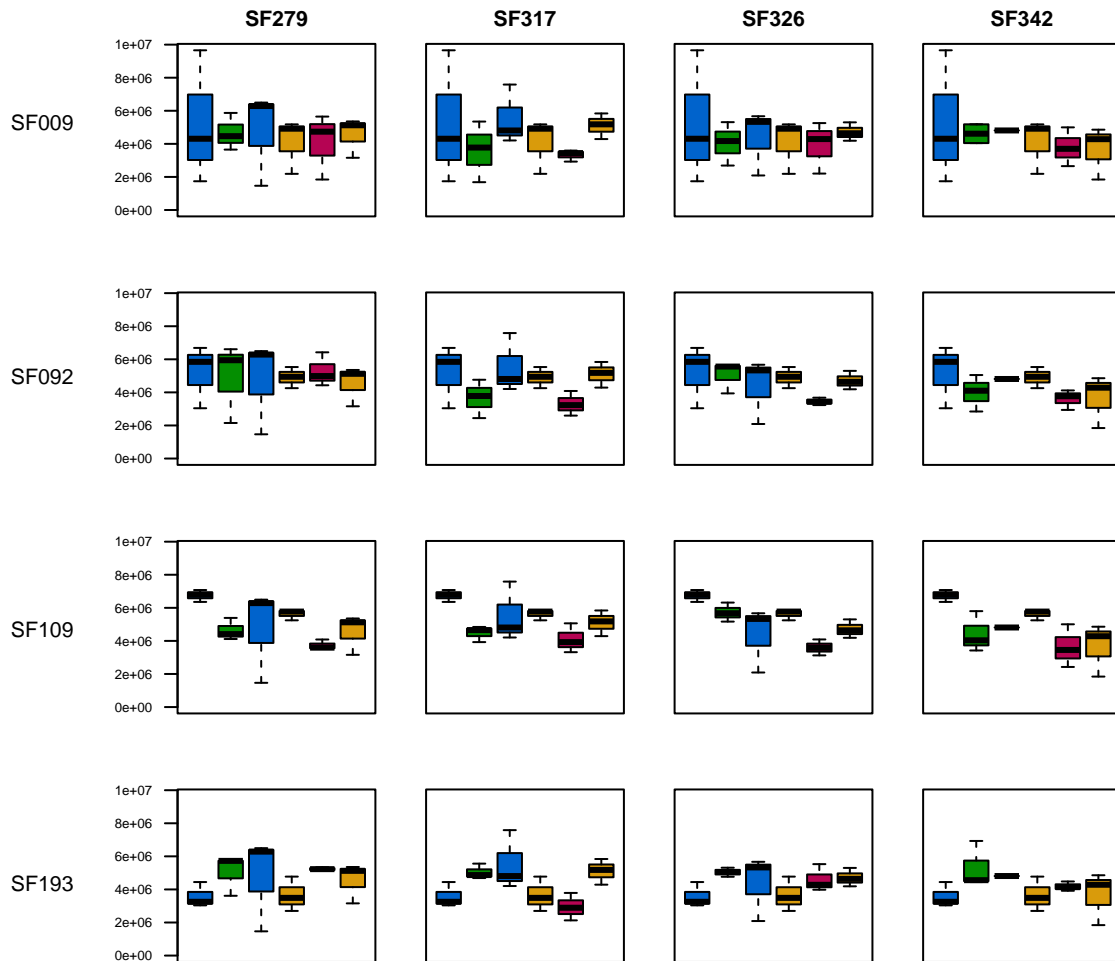

HanXRQChr15g0476311  
Probable 50S ribosomal protein L15,  
chloroplastic

Parents WW  
Parents WD  
Hybrids WW  
Hybrids WD

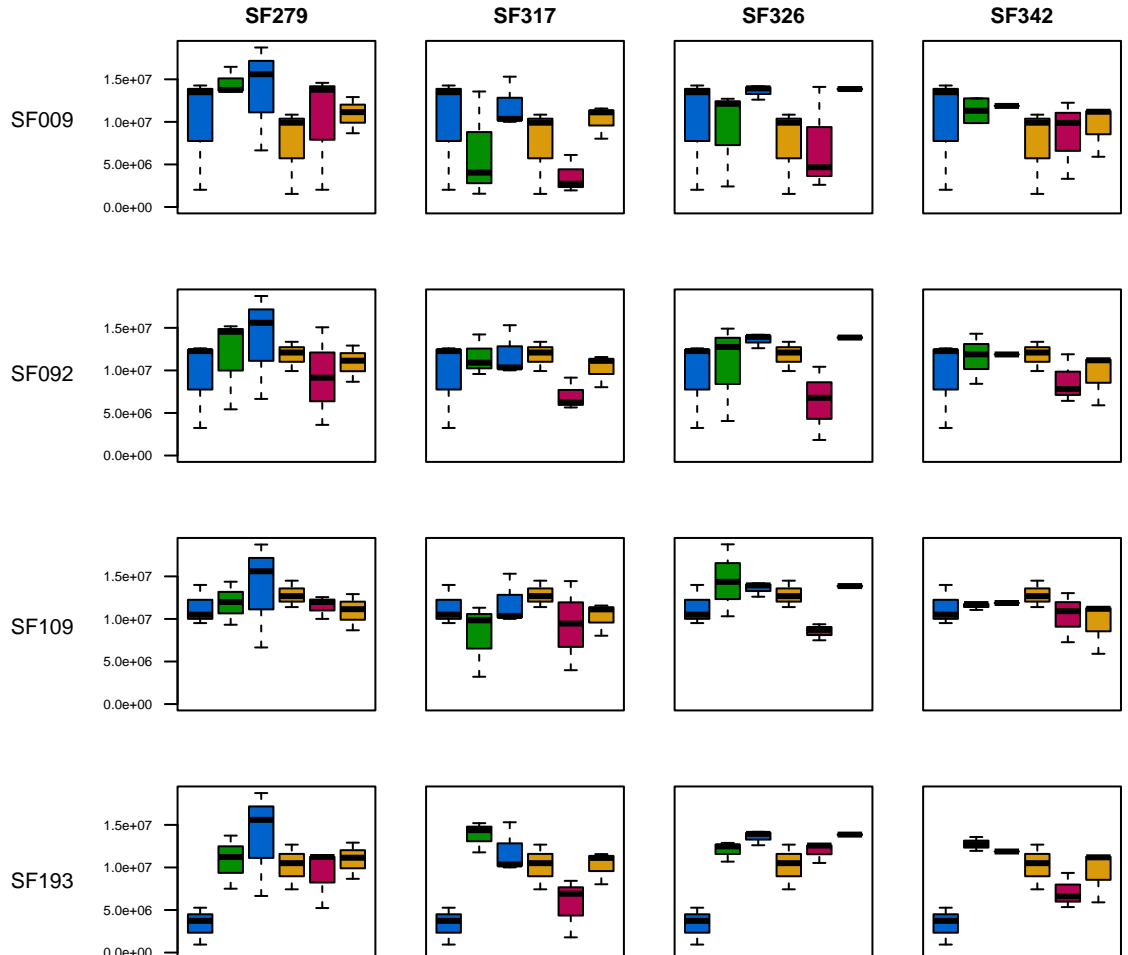

HanXRQChr13g0410161  
Uncharacterized conserved protein

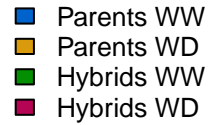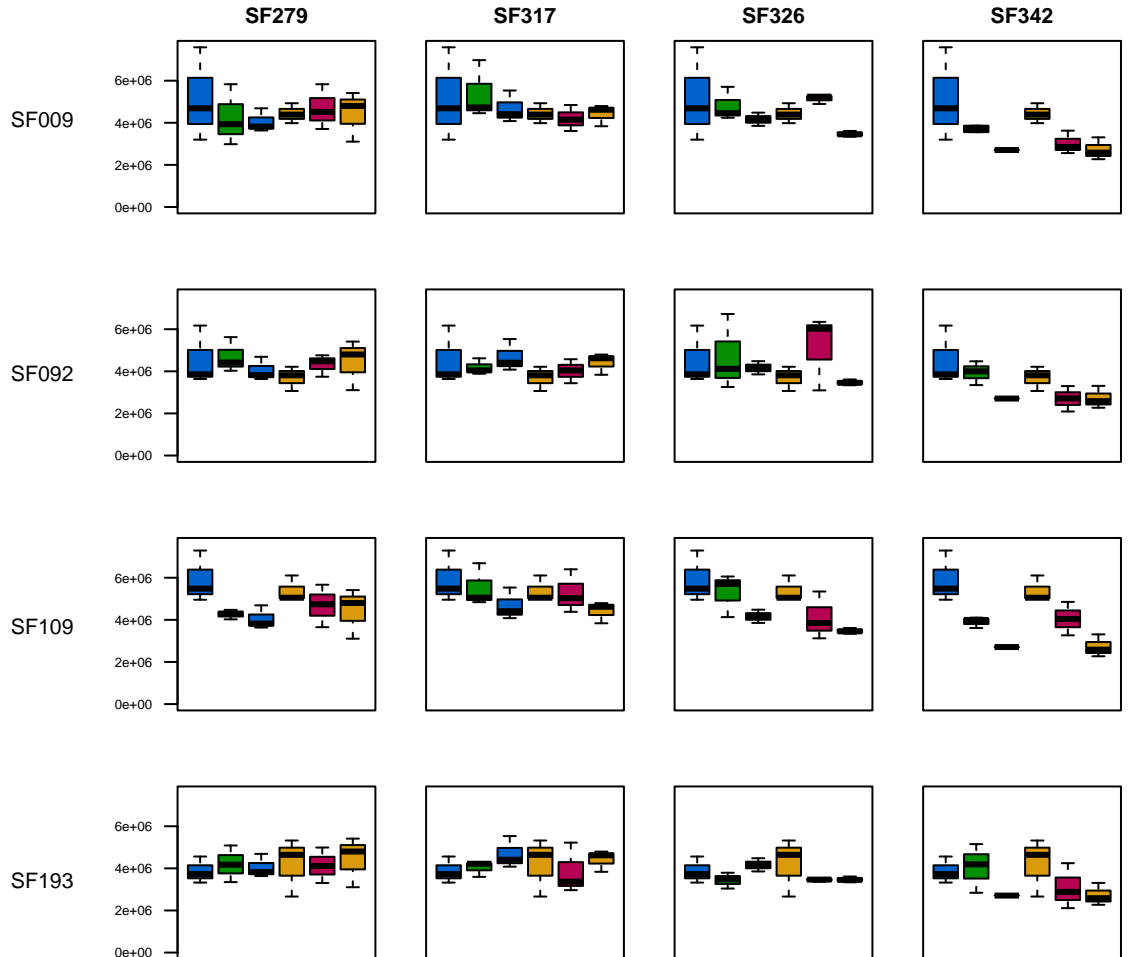

HanXRQChr11g0345321  
 Probable elongation factor P (EF-P)  
 family protein

Parents WW  
 Parents WD  
 Hybrids WW  
 Hybrids WD

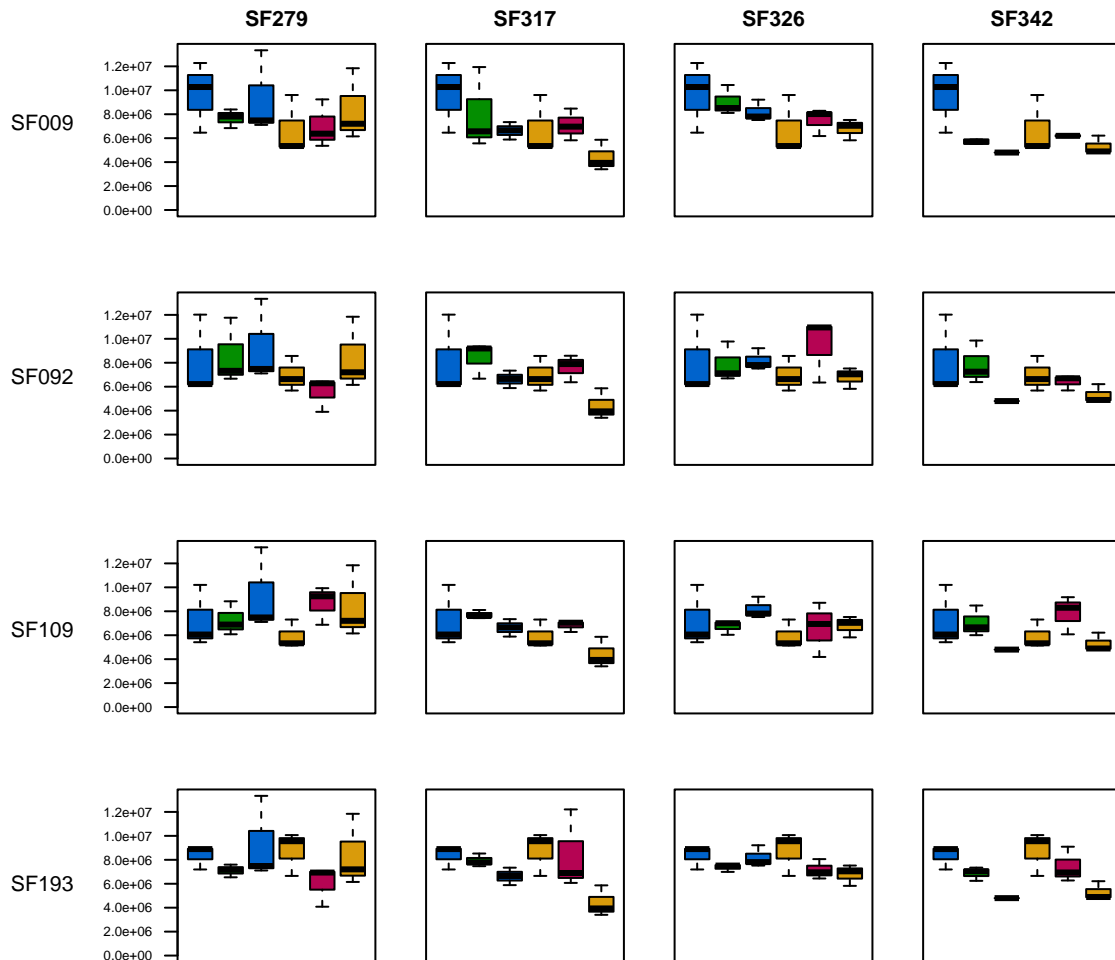

HanXRQChr01g0020261  
Putative photosystem II PsbH,  
phosphoprotein; Di-haem cytochrome, tran

Parents WW  
Parents WD  
Hybrids WW  
Hybrids WD

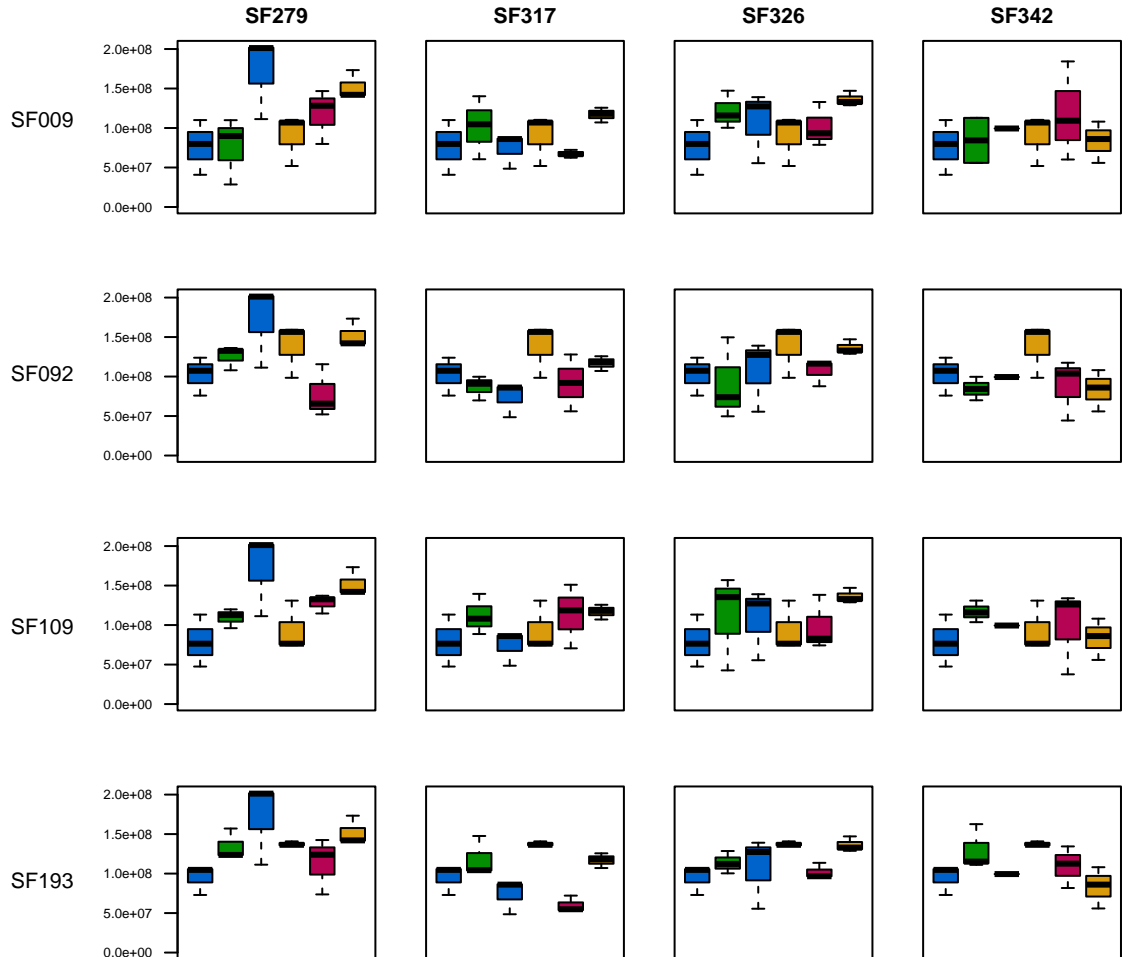

HanXRQChr10g0297861  
Probable 3-oxo-Delta(4,5)-steroid  
5-beta-reductase

Parents WW  
Parents WD  
Hybrids WW  
Hybrids WD

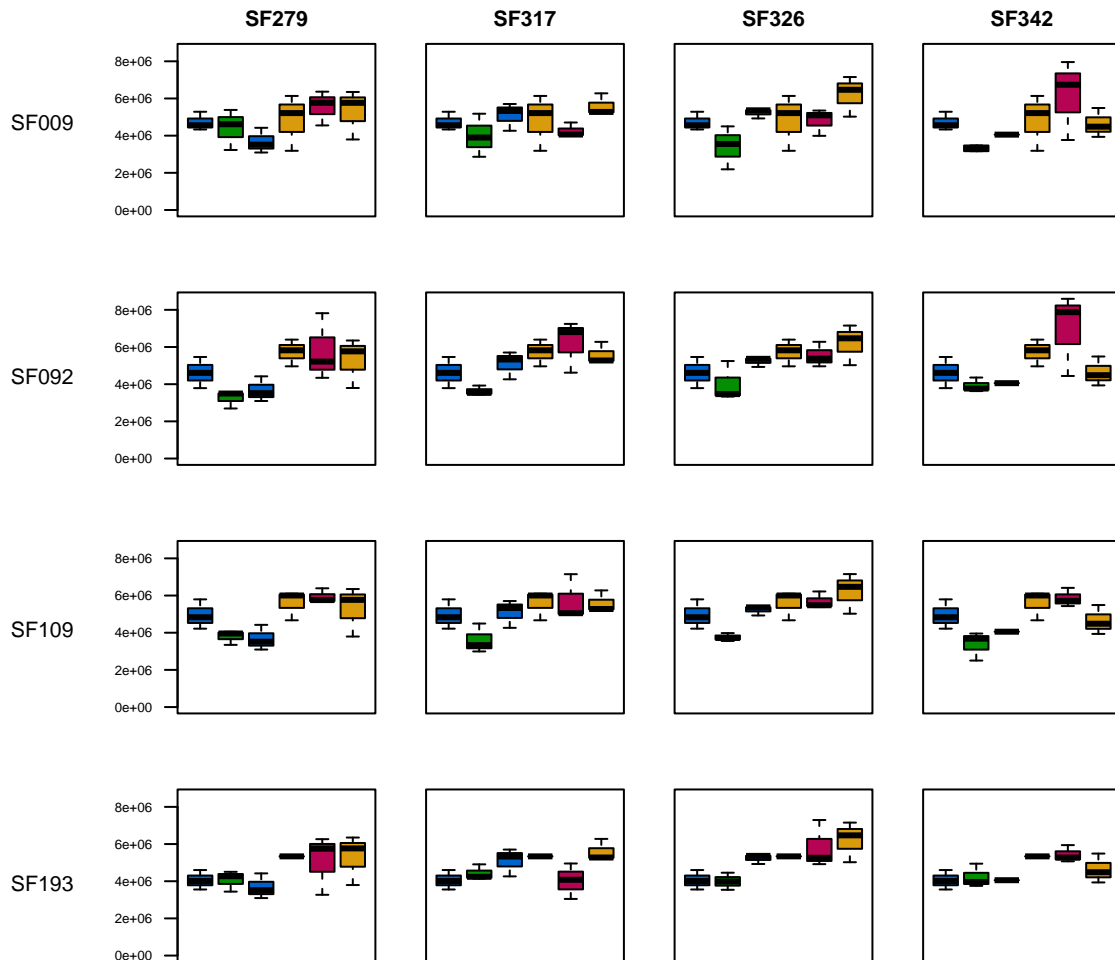



HanXRQChr01g0011001  
Probable proliferating cell nuclear  
antigen

Parents WW  
Parents WD  
Hybrids WW  
Hybrids WD

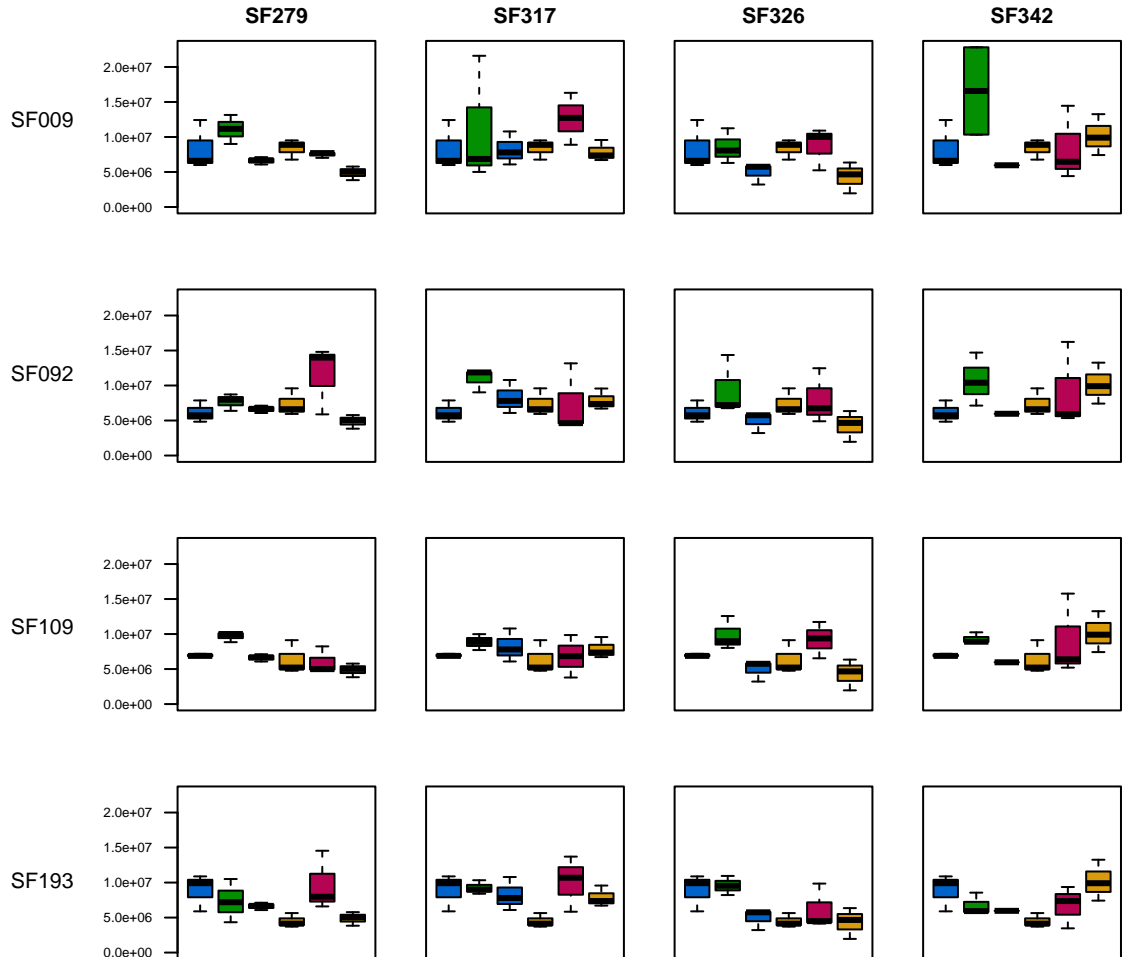

HanXRQChr11g0353041  
Probable thylakoid rhodanese-like

Parents WW  
Parents WD  
Hybrids WW  
Hybrids WD

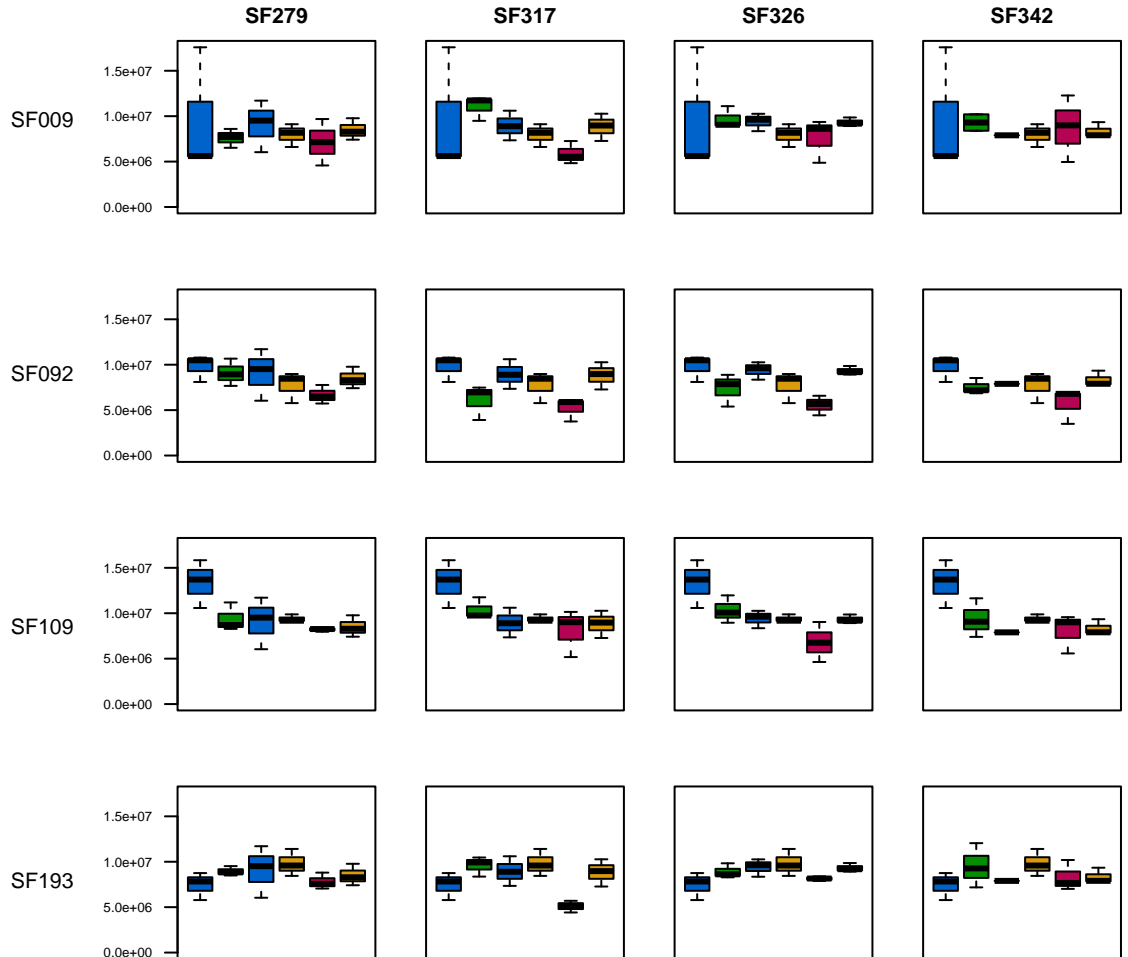

HanXRQChr04g0094161  
Probable D-3-phosphoglycerate  
dehydrogenase

Parents WW  
Parents WD  
Hybrids WW  
Hybrids WD

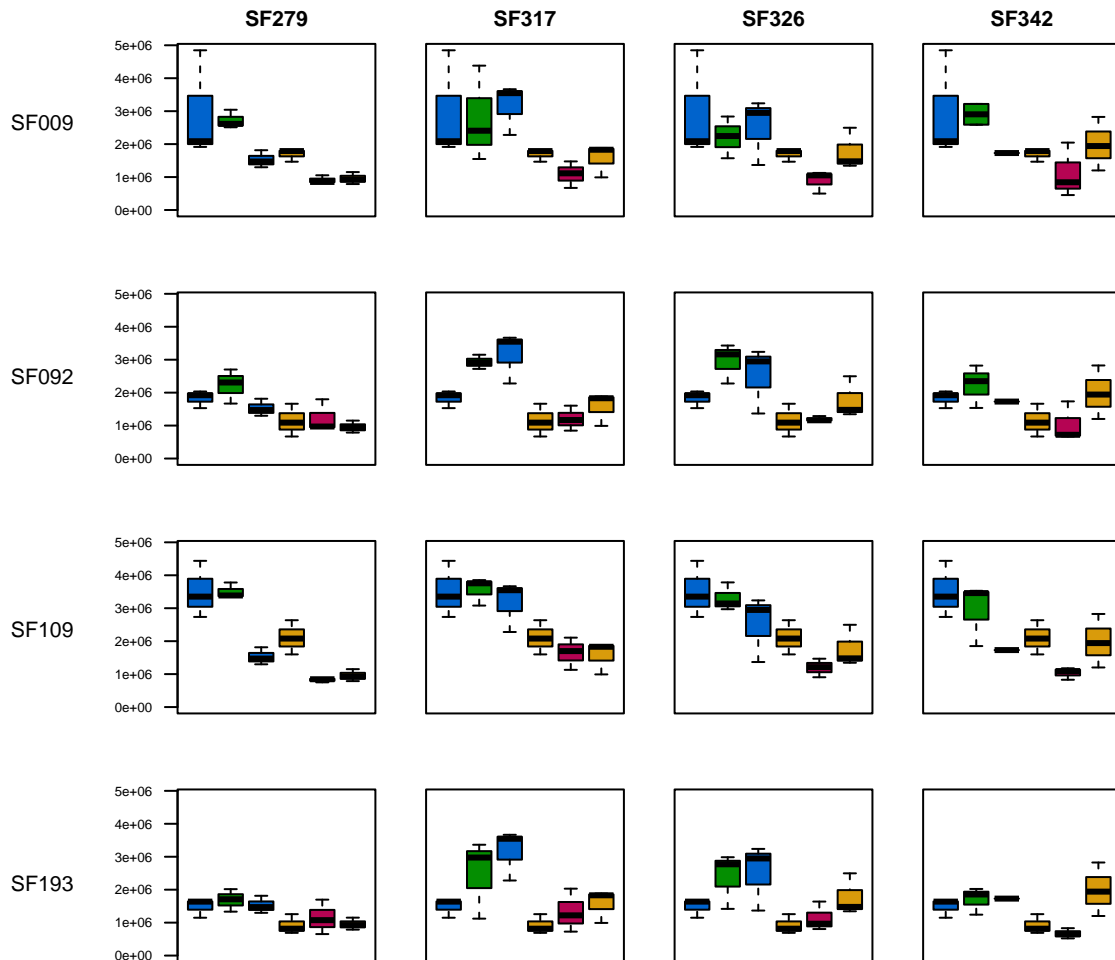

HanXRQChr03g0075051  
Probable galactose oxidase/kelch repeat  
superfamily protein

Parents WW  
Parents WD  
Hybrids WW  
Hybrids WD

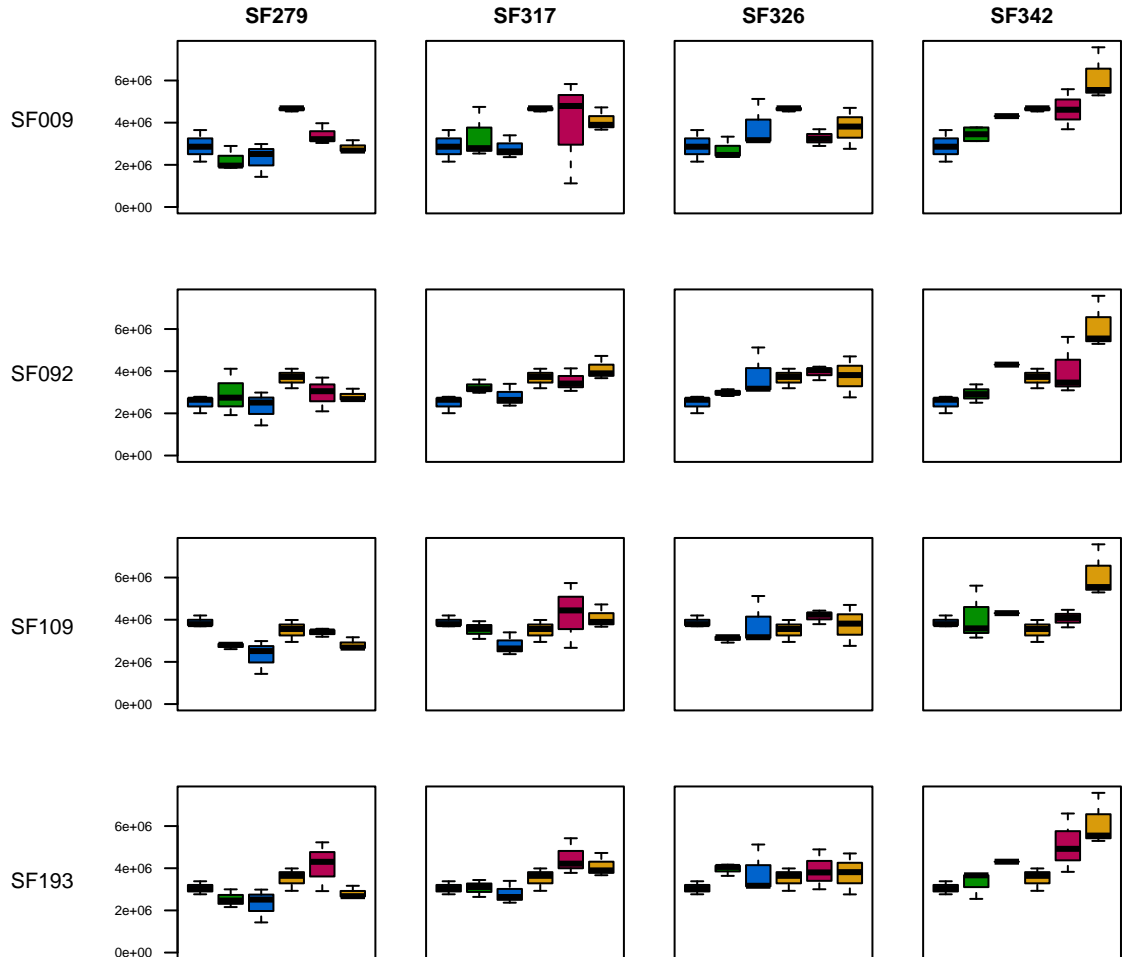

HanXRQChr11g0321981  
Putative cyclophilin-type  
peptidyl-prolyl cis-trans isomerase domain

Parents WW  
Parents WD  
Hybrids WW  
Hybrids WD

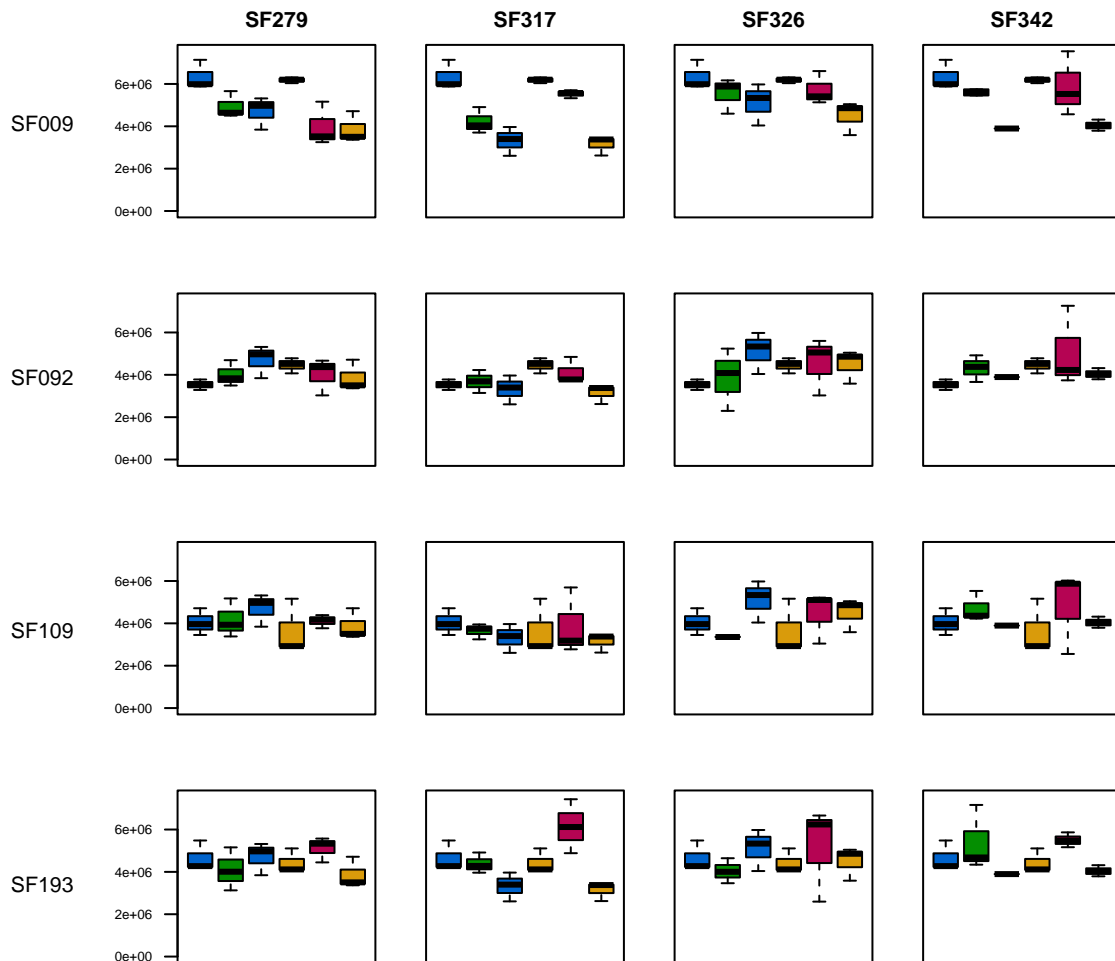

HanXRQChr03g0072981  
Putative tubulin; Tubulin, C-terminal

Parents WW  
Parents WD  
Hybrids WW  
Hybrids WD

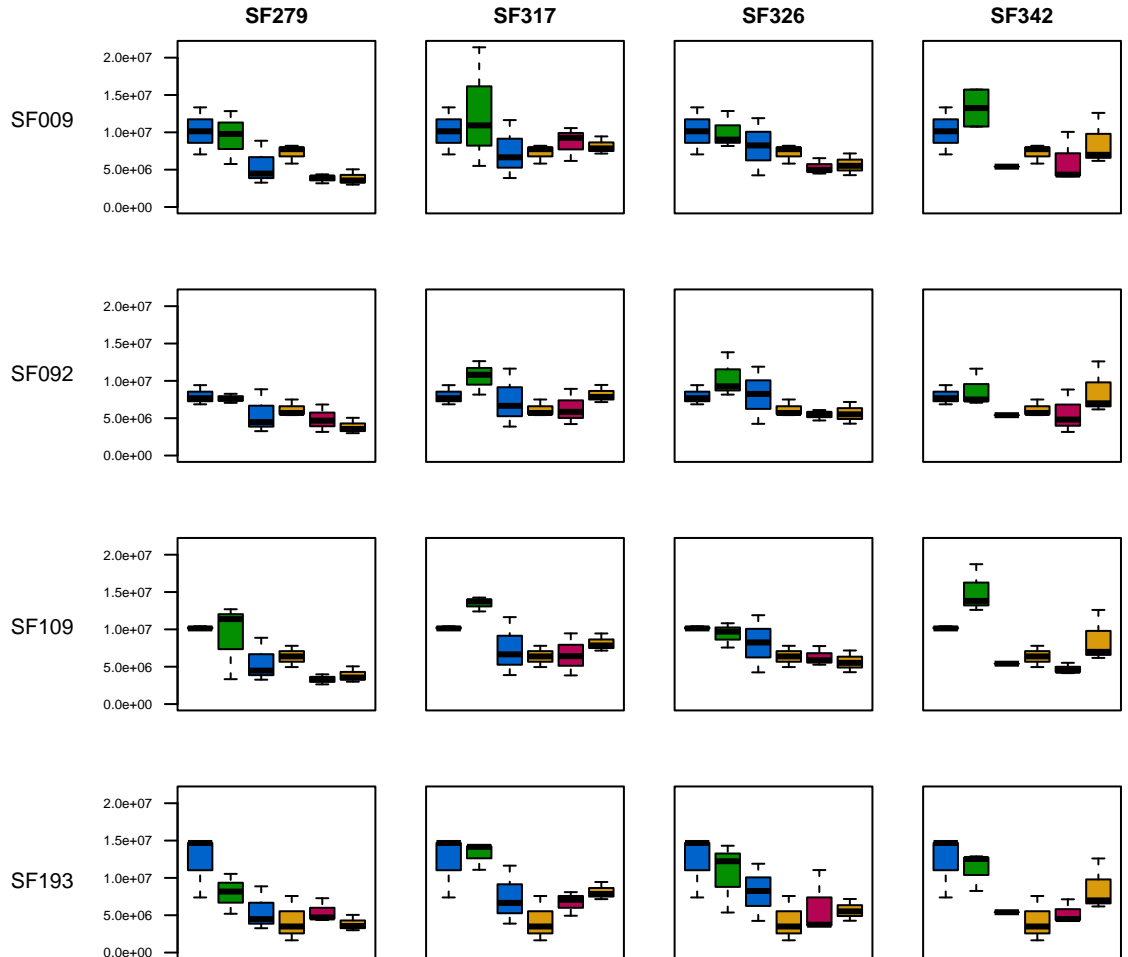

HanXRQChr02g0036541  
Probable 40S ribosomal protein S21

Parents WW  
Parents WD  
Hybrids WW  
Hybrids WD

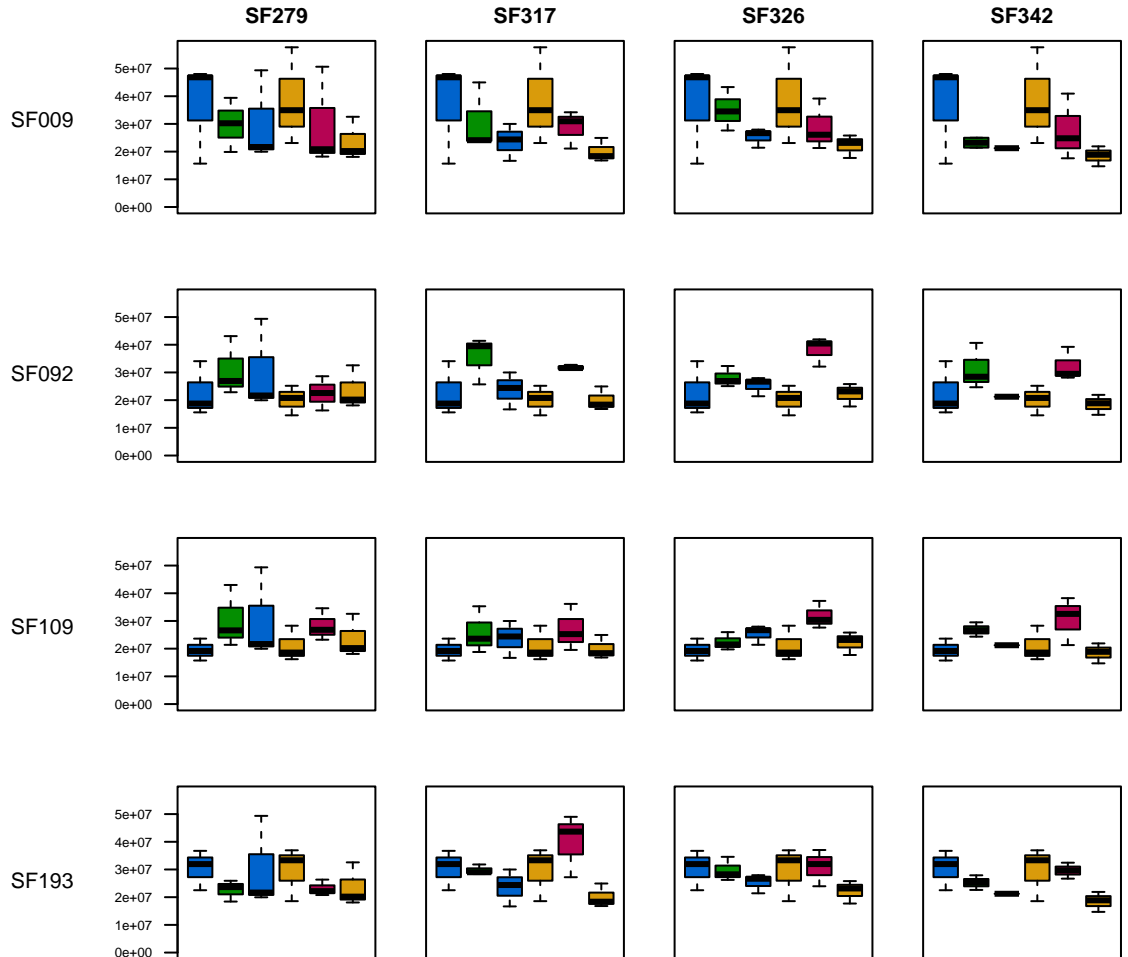

HanXRQChr12g0367571  
 Putative LSM domain; Like-Sm (LSM)  
 domain containing protein, LSM4/SmD1/Sr

Parents WW  
 Parents WD  
 Hybrids WW  
 Hybrids WD

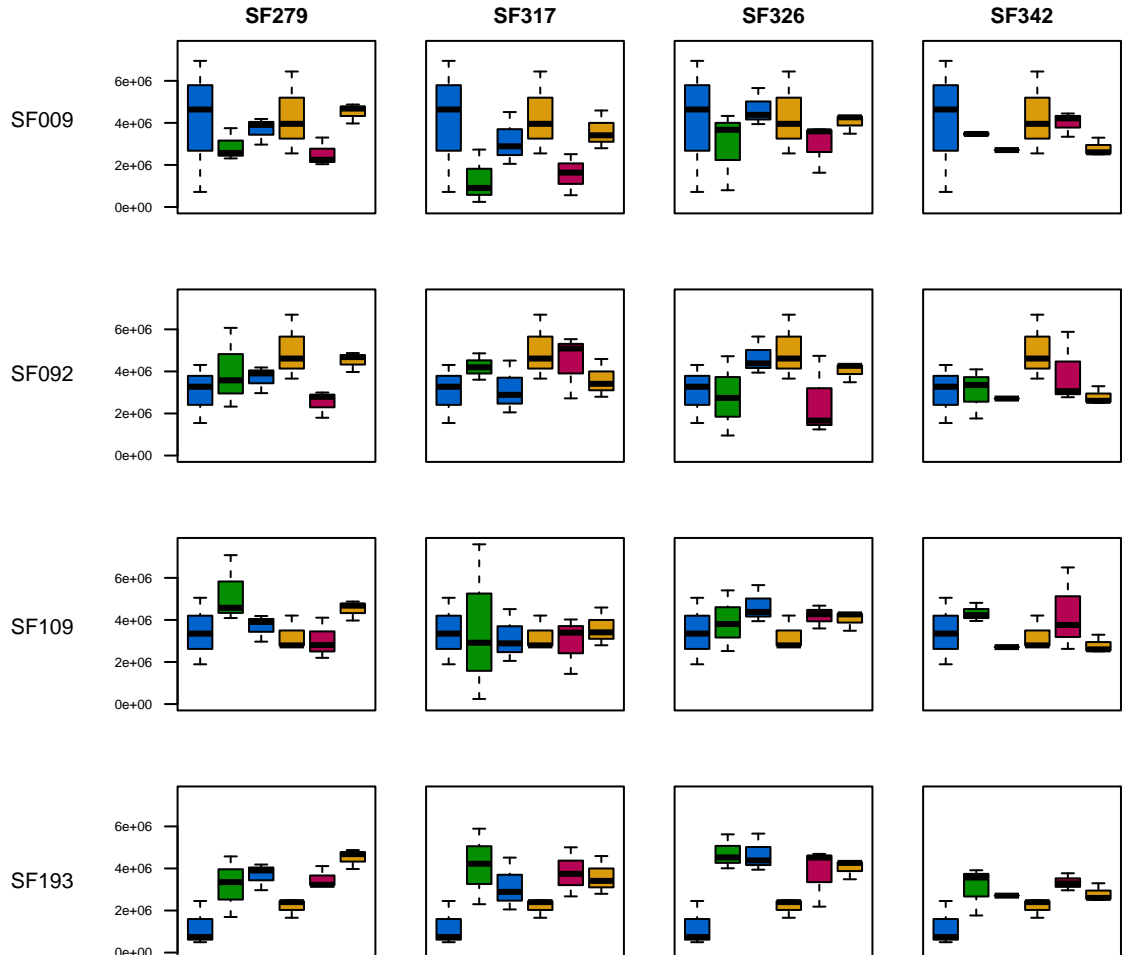



HanXRQChr09g0260301  
Putative six-bladed beta-propeller,  
TolB-like

Parents WW  
Parents WD  
Hybrids WW  
Hybrids WD

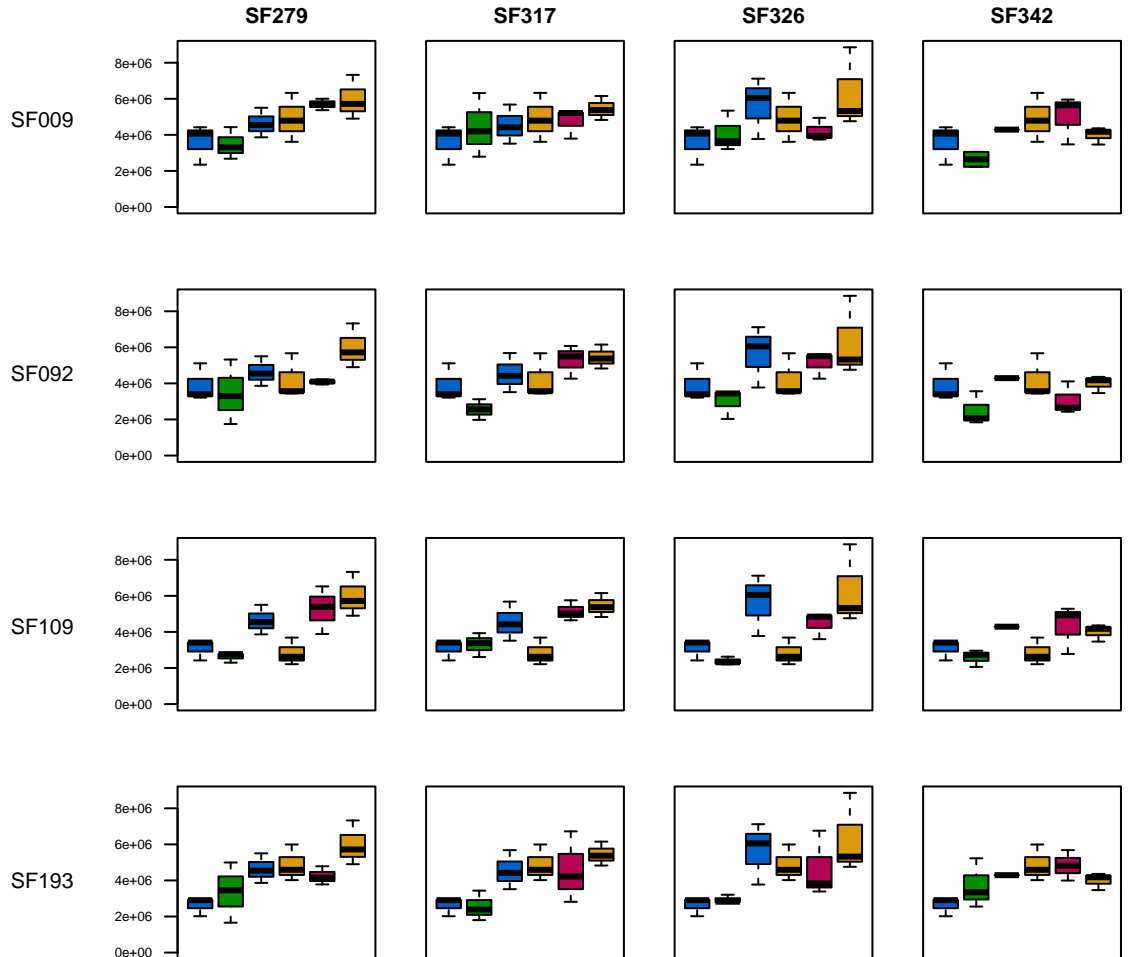

HanXRQChr03g0087881  
Putative cupredoxin

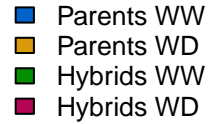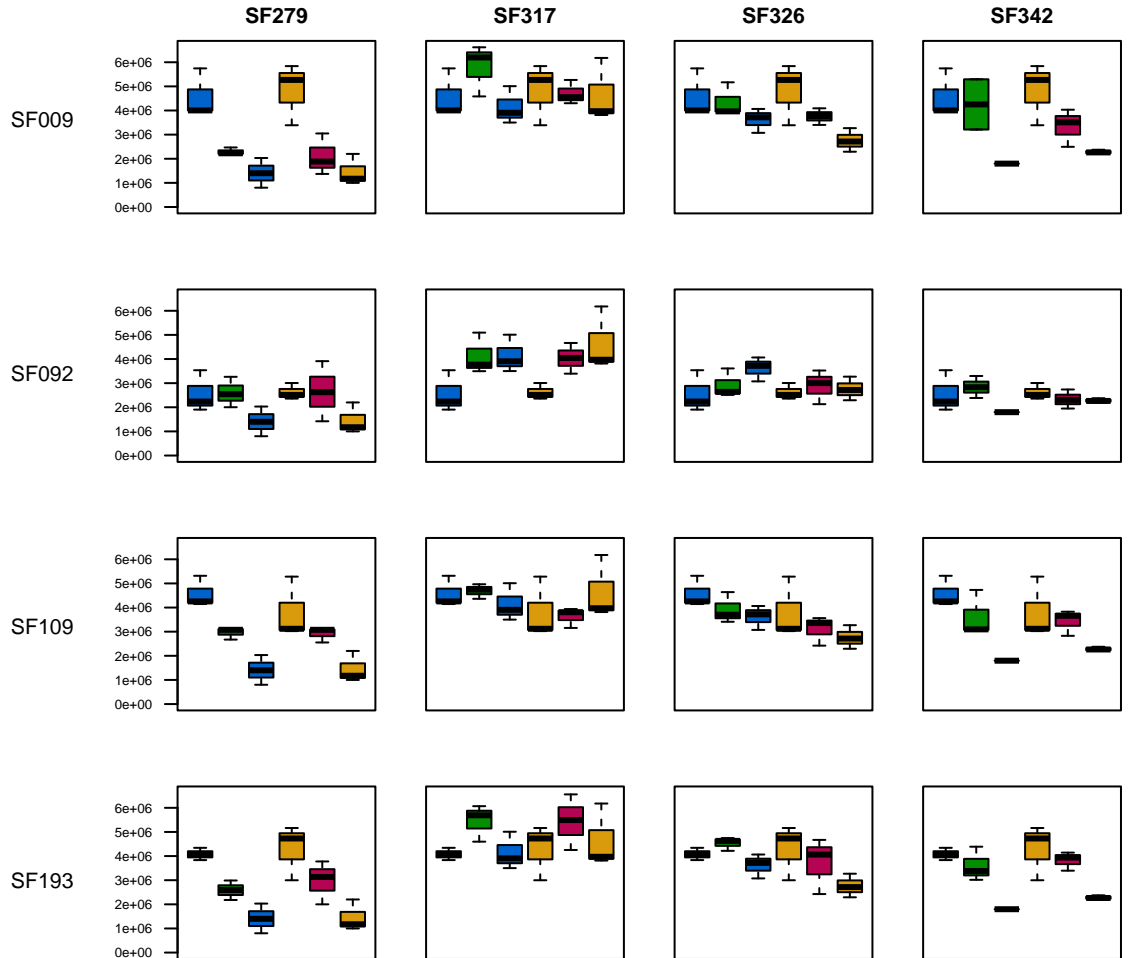

HanXRQChr11g0344101  
Probable nucleoside diphosphate kinase A

- Parents WW
- Parents WD
- Hybrids WW
- Hybrids WD

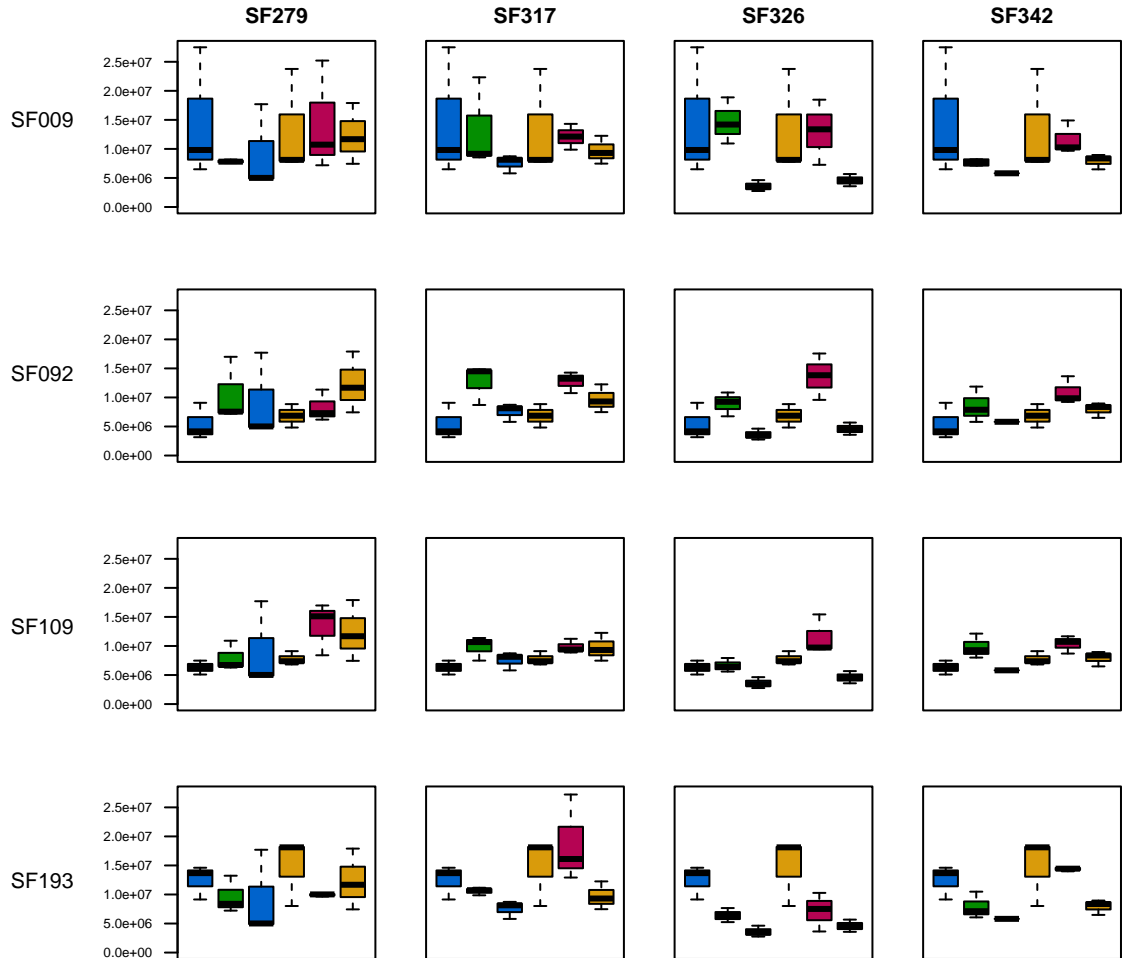

HanXRQChr08g0230861  
Probable 60S ribosomal protein L10

Parents WW  
Parents WD  
Hybrids WW  
Hybrids WD

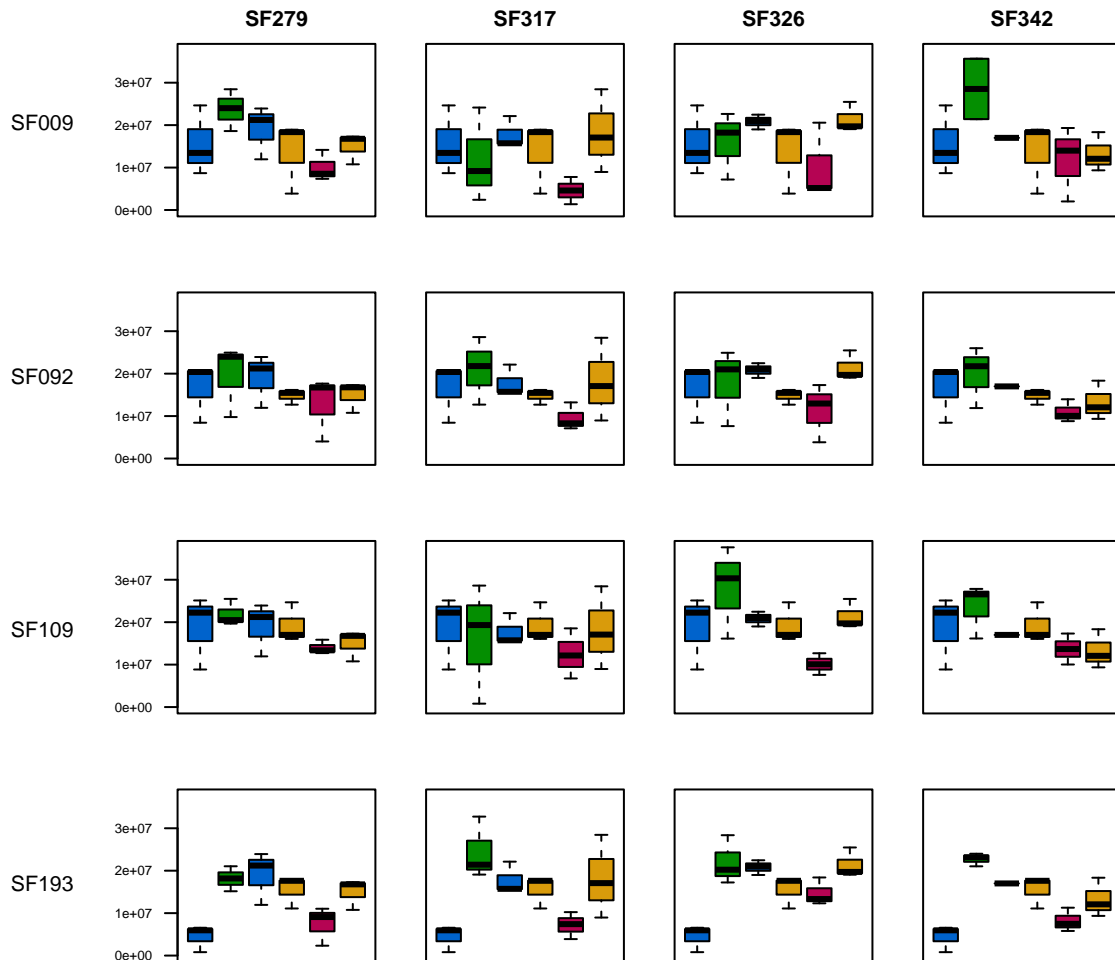

HanXRQChr14g0460221  
Probable uroporphyrinogen  
decarboxylase, chloroplastic

Parents WW  
Parents WD  
Hybrids WW  
Hybrids WD

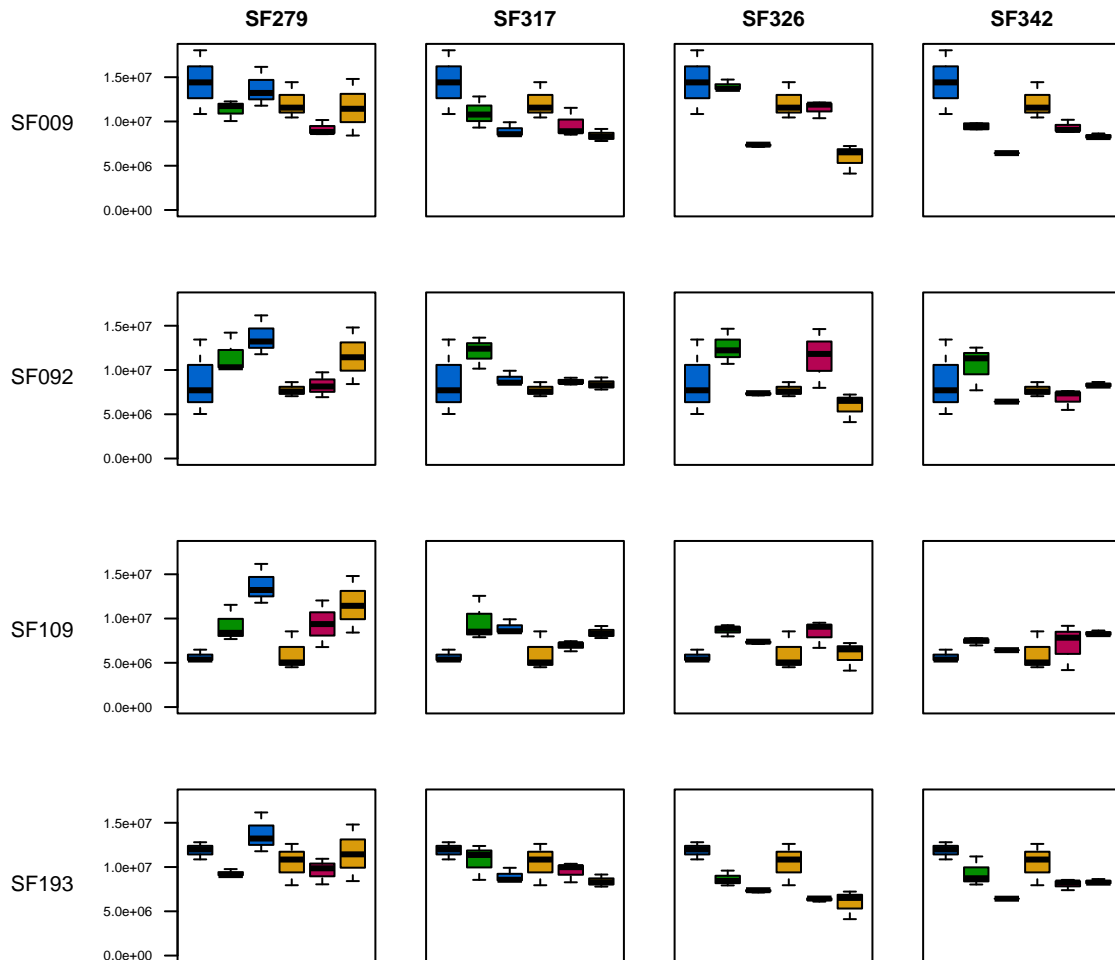

HanXRQChr02g0056201  
Probable chaperonin-like RbcX protein

Parents WW  
Parents WD  
Hybrids WW  
Hybrids WD

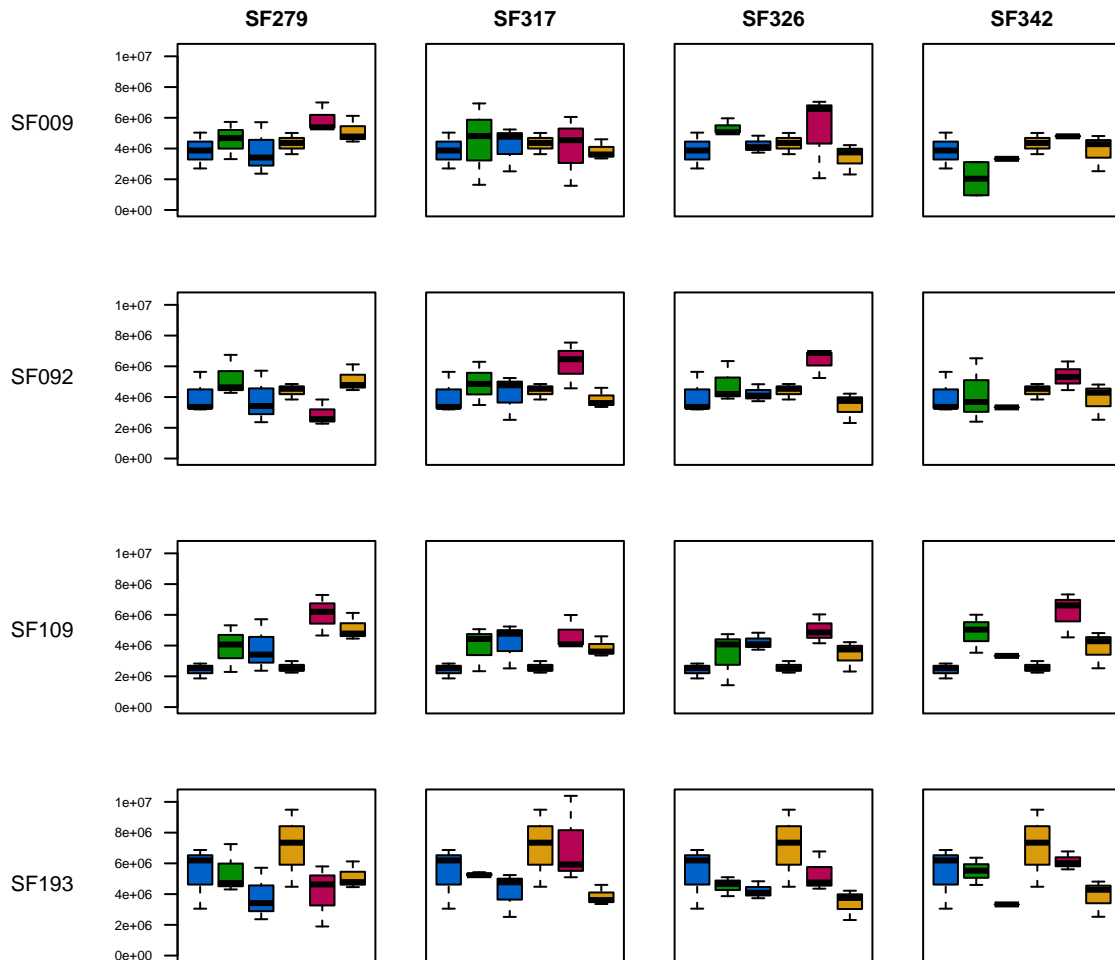

HanXRQChr16g0515151  
Uncharacterized conserved protein

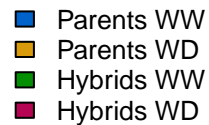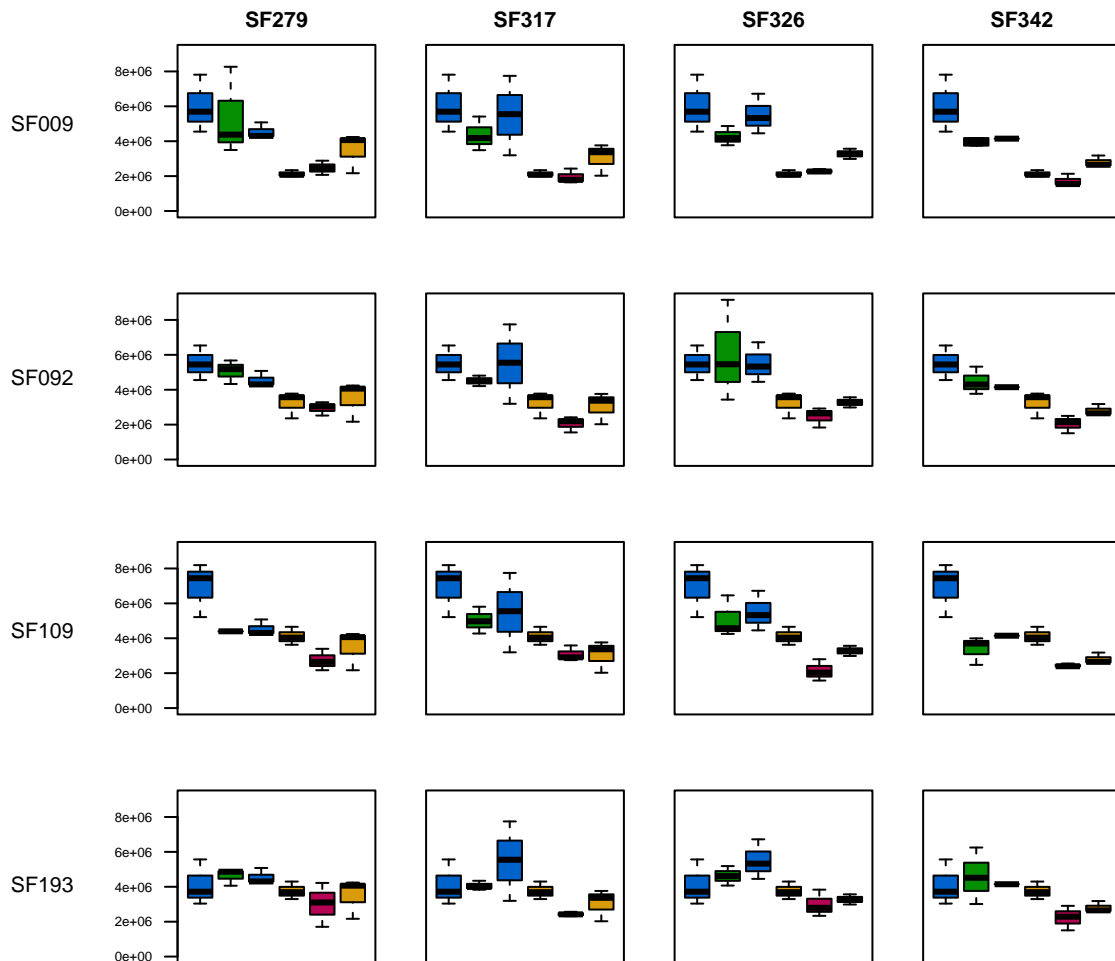

HanXRQChr05g0148761  
Putative haem peroxidase

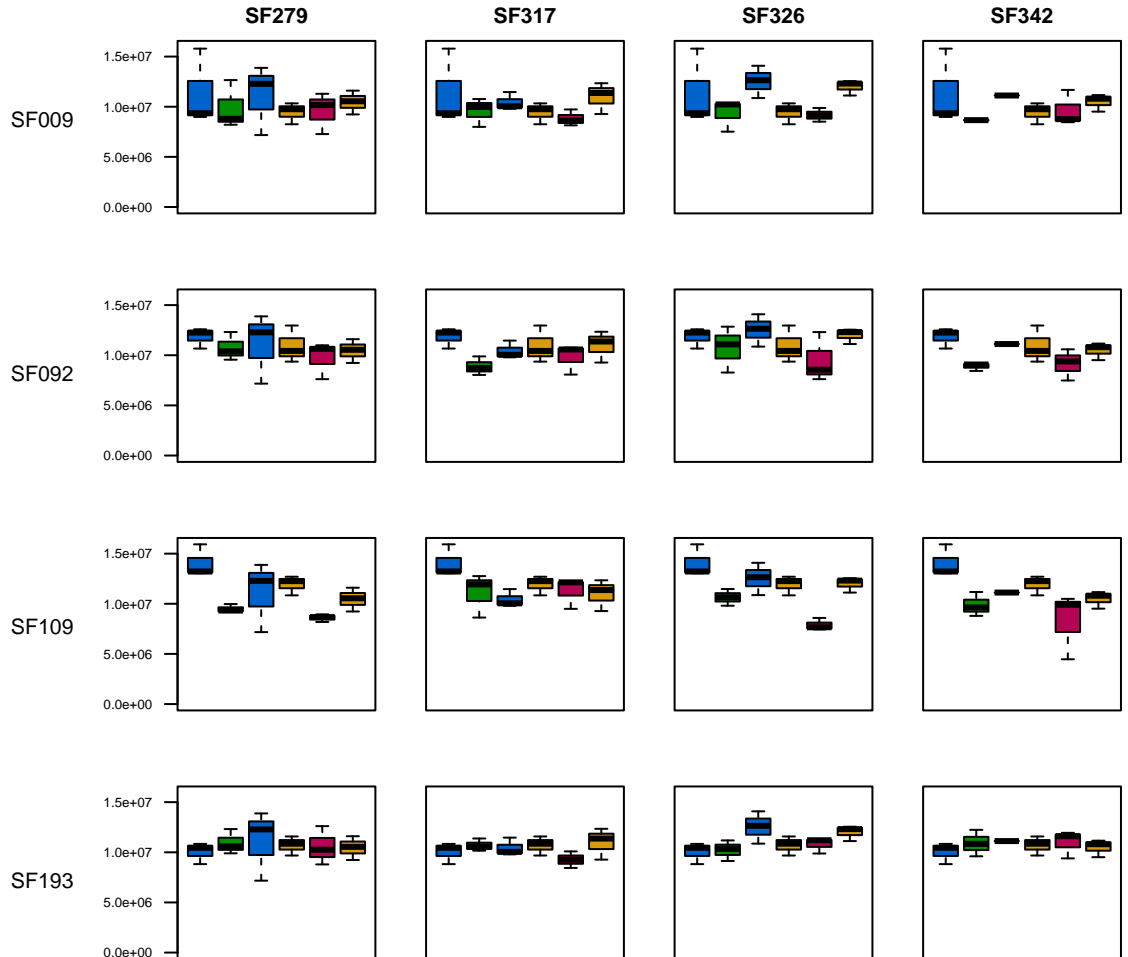



HanXRQChr08g0230791  
Putative protein of unknown function  
DUF2996

Parents WW  
Parents WD  
Hybrids WW  
Hybrids WD

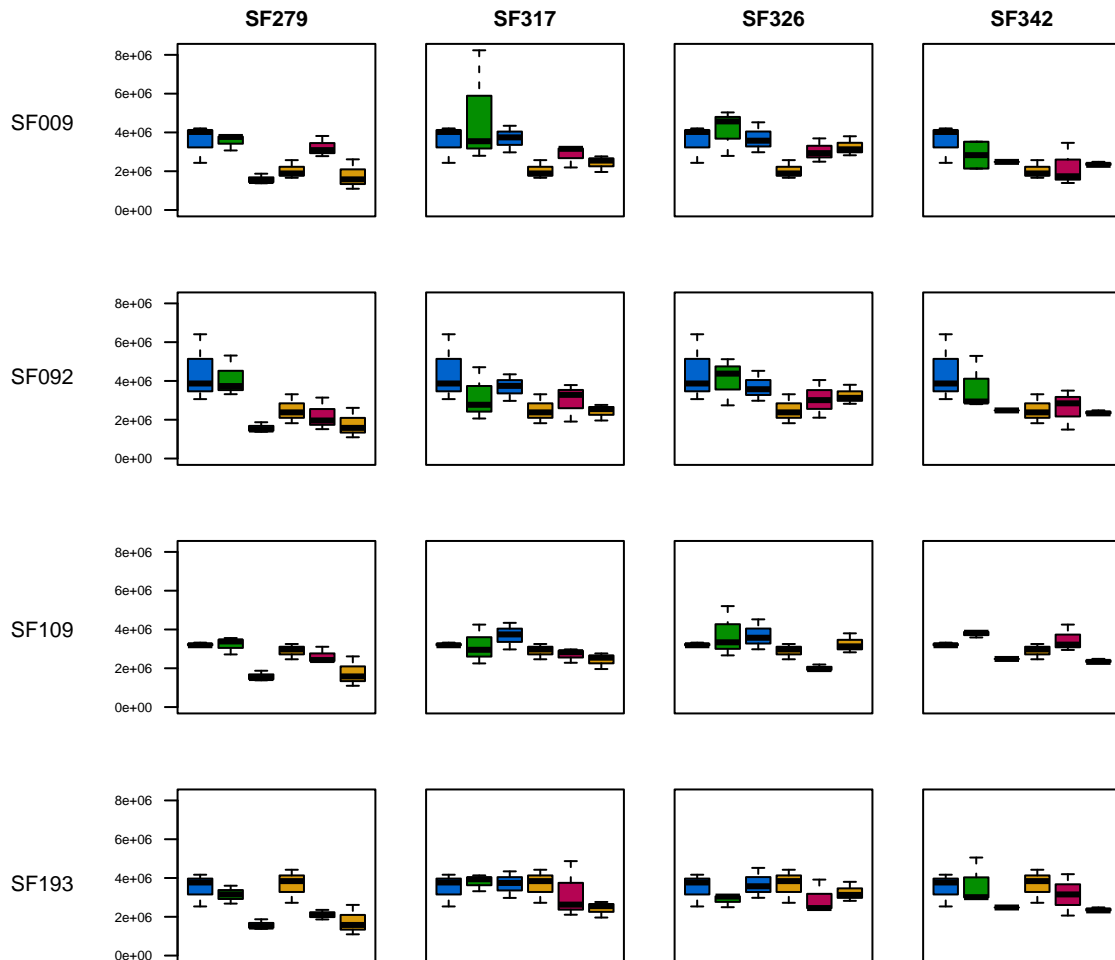

HanXRQChr01g0005481  
Probable ribosomal protein S13/S18  
family

Parents WW  
Parents WD  
Hybrids WW  
Hybrids WD

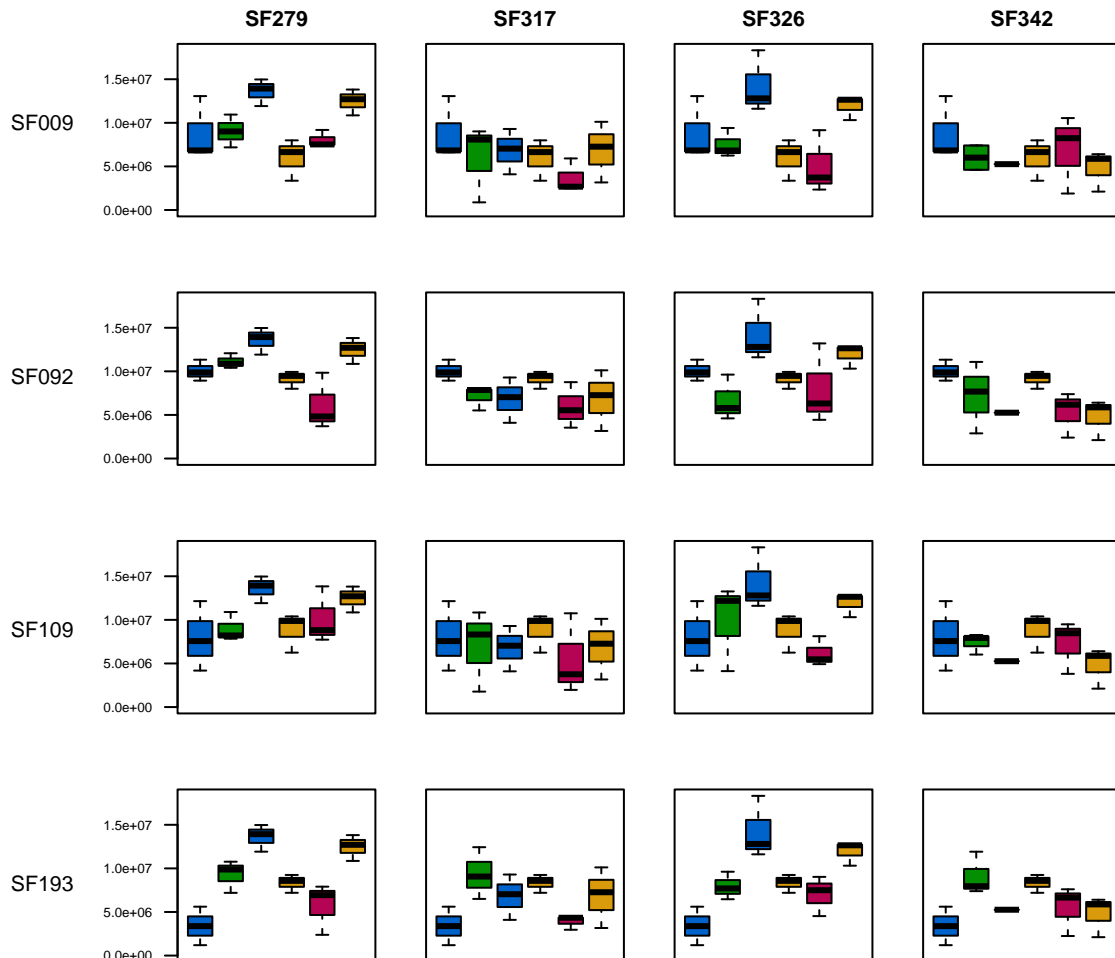

HanXRQChr02g0045011  
Probable glycosyl hydrolase family  
protein

Parents WW  
Parents WD  
Hybrids WW  
Hybrids WD

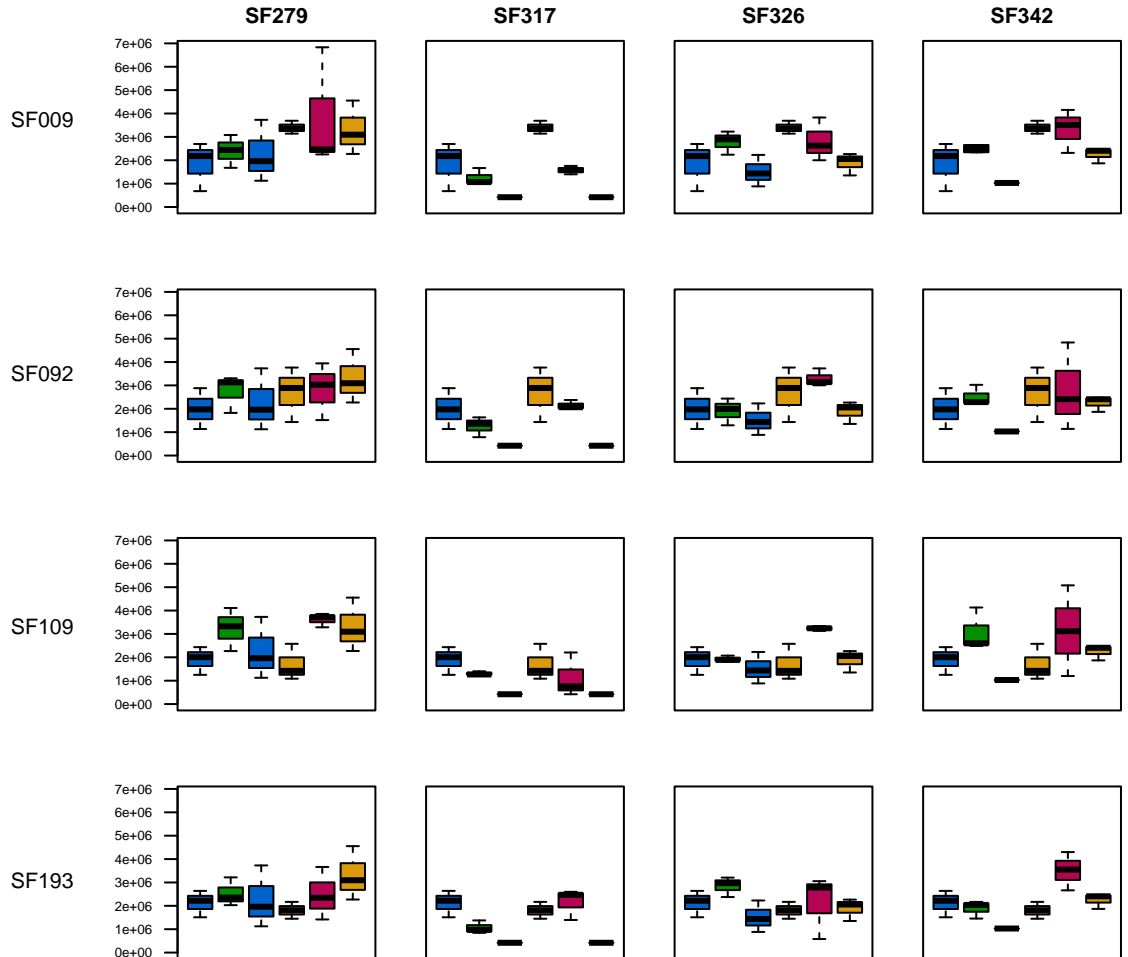

HanXRQChr13g0408961  
 Probable photosystem I reaction center  
 subunit IV, chloroplastic

Parents WW  
 Parents WD  
 Hybrids WW  
 Hybrids WD

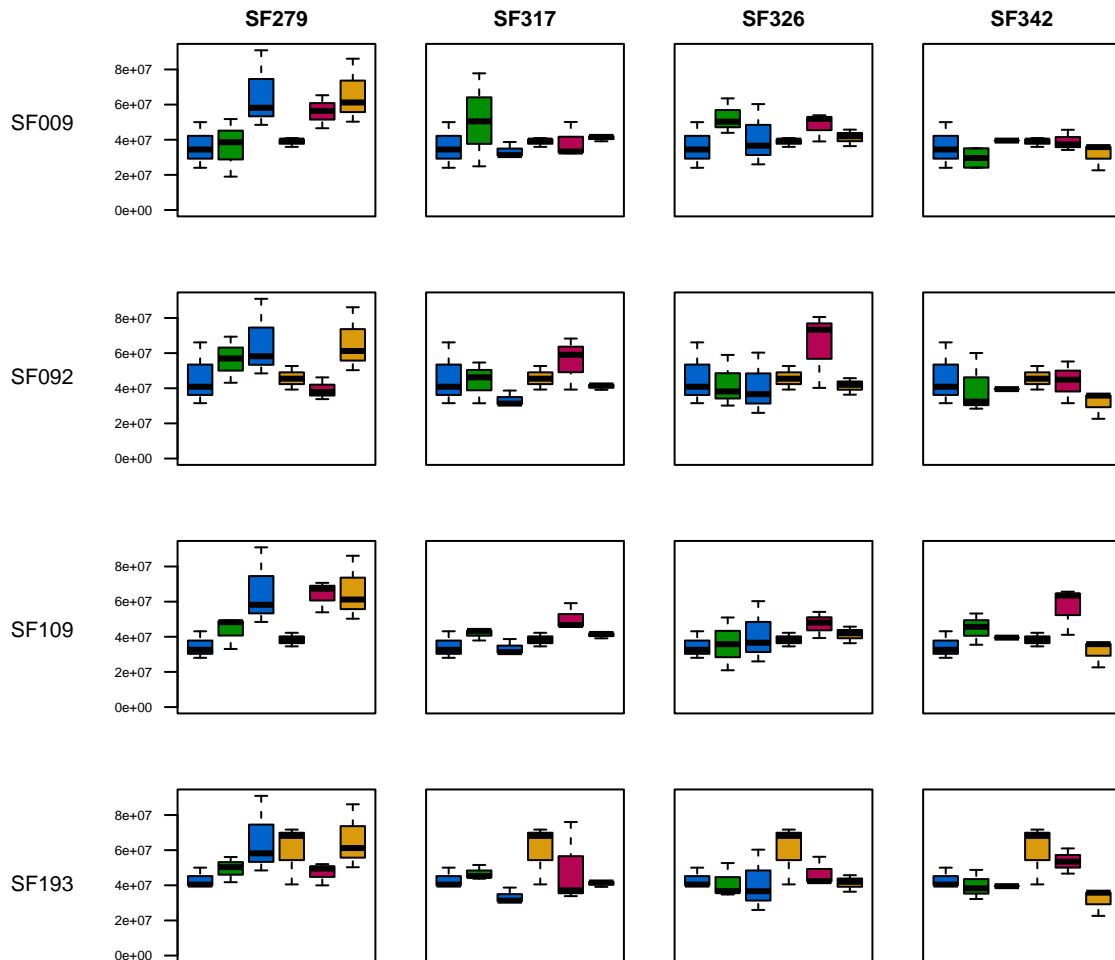

HanXRQChr04g0110521  
Probable rho termination factor

Parents WW  
Parents WD  
Hybrids WW  
Hybrids WD

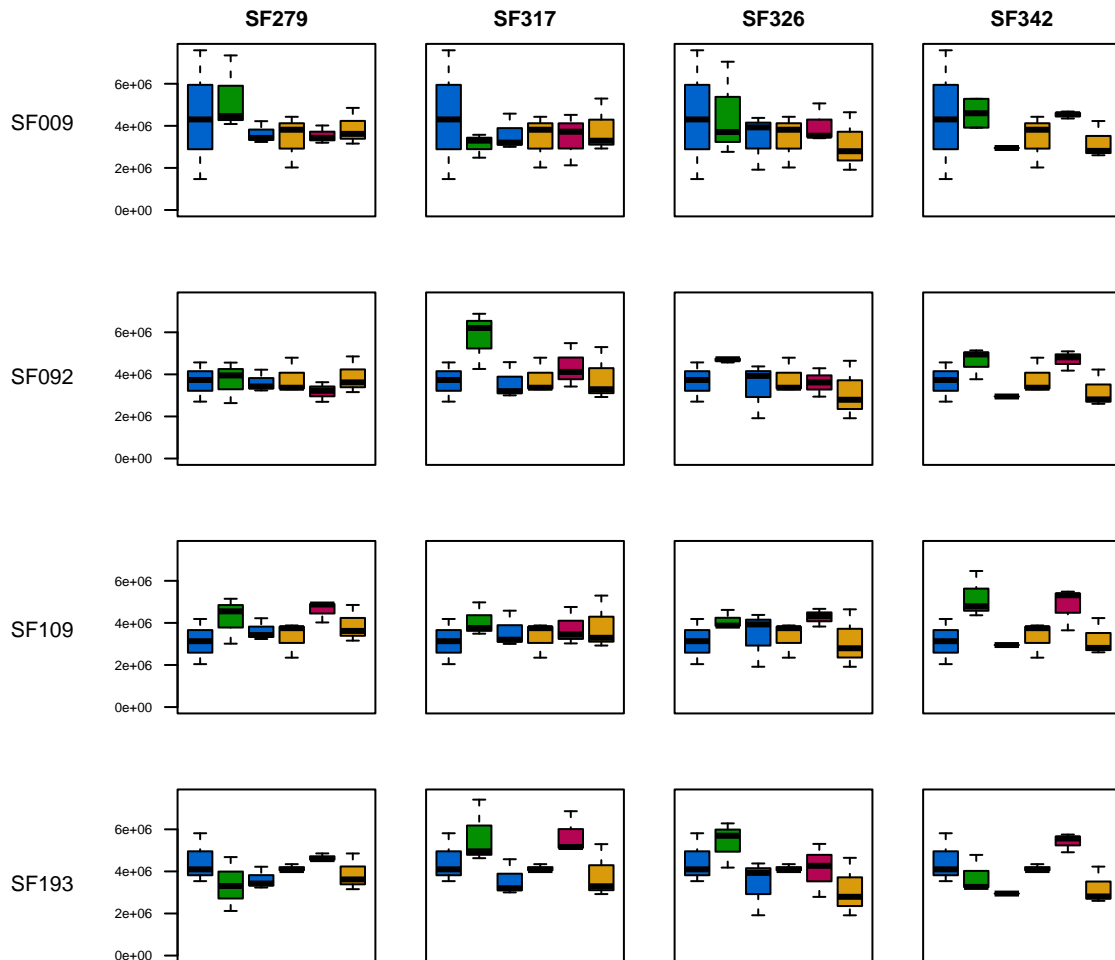

HanXRQChr10g0308121  
Probable involved in response to salt  
stress. Knockout mutants are hypersensitive

Parents WW  
Parents WD  
Hybrids WW  
Hybrids WD

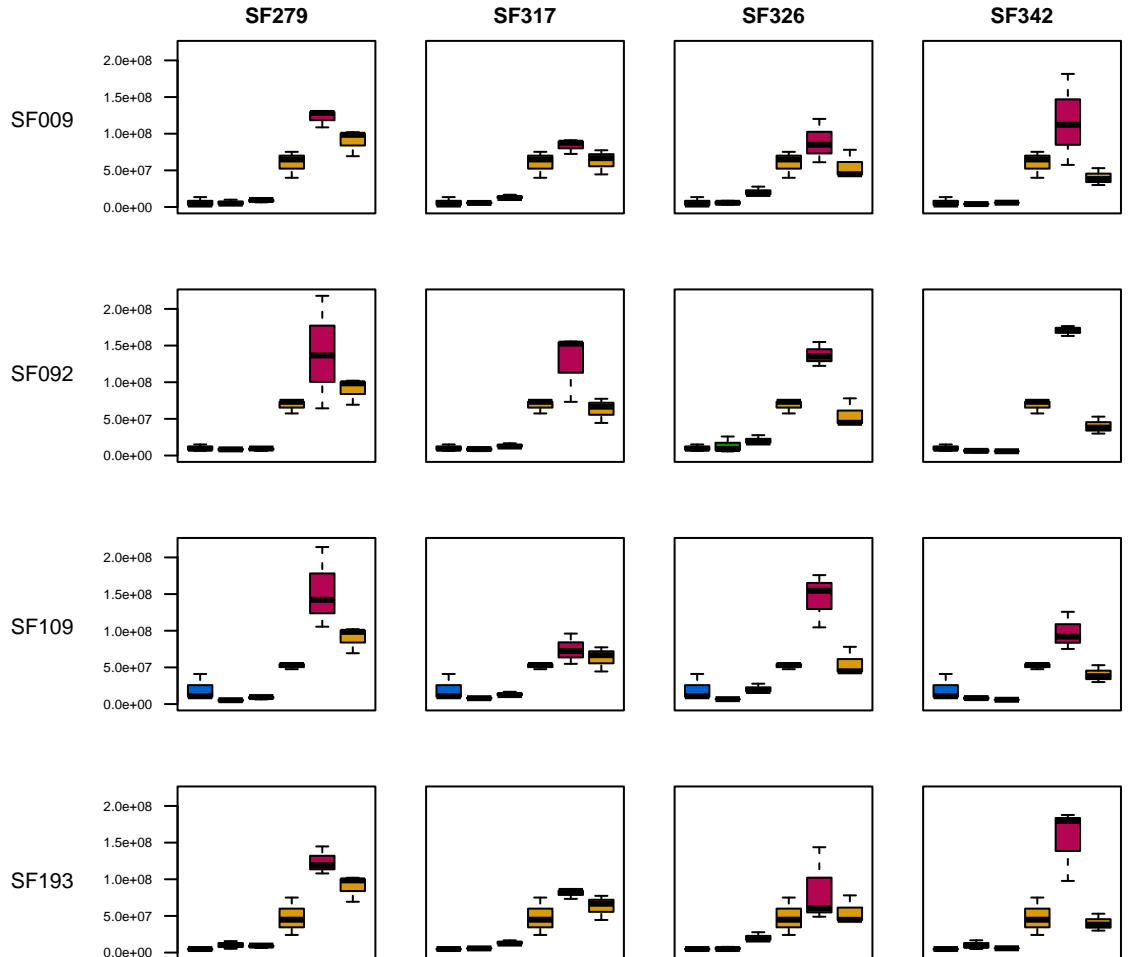

HanXRQChr02g0040851  
Probable isoflavone reductase-like  
protein

Parents WW  
Parents WD  
Hybrids WW  
Hybrids WD

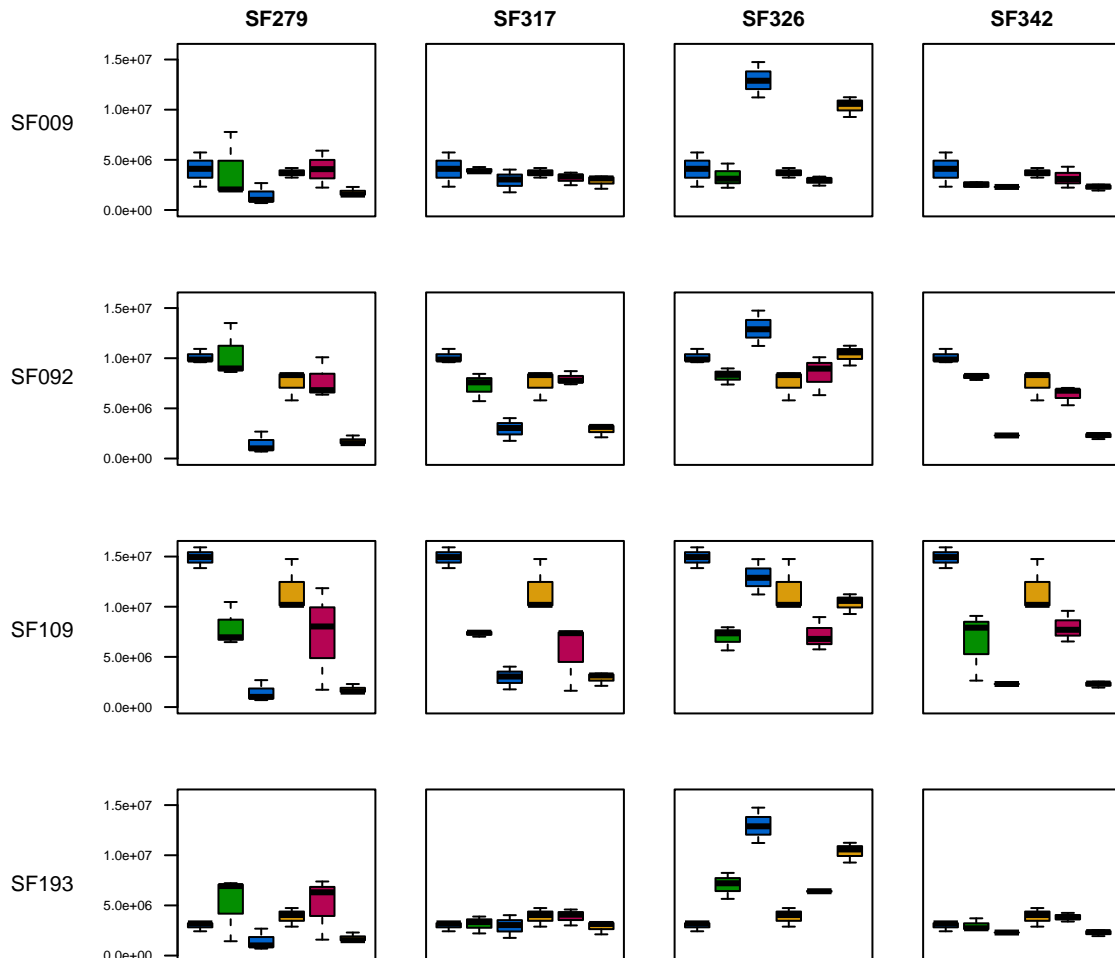

HanXRQChr01g0023891  
Probable eukaryotic translation  
initiation factor 2 subunit 3

Parents WW  
Parents WD  
Hybrids WW  
Hybrids WD

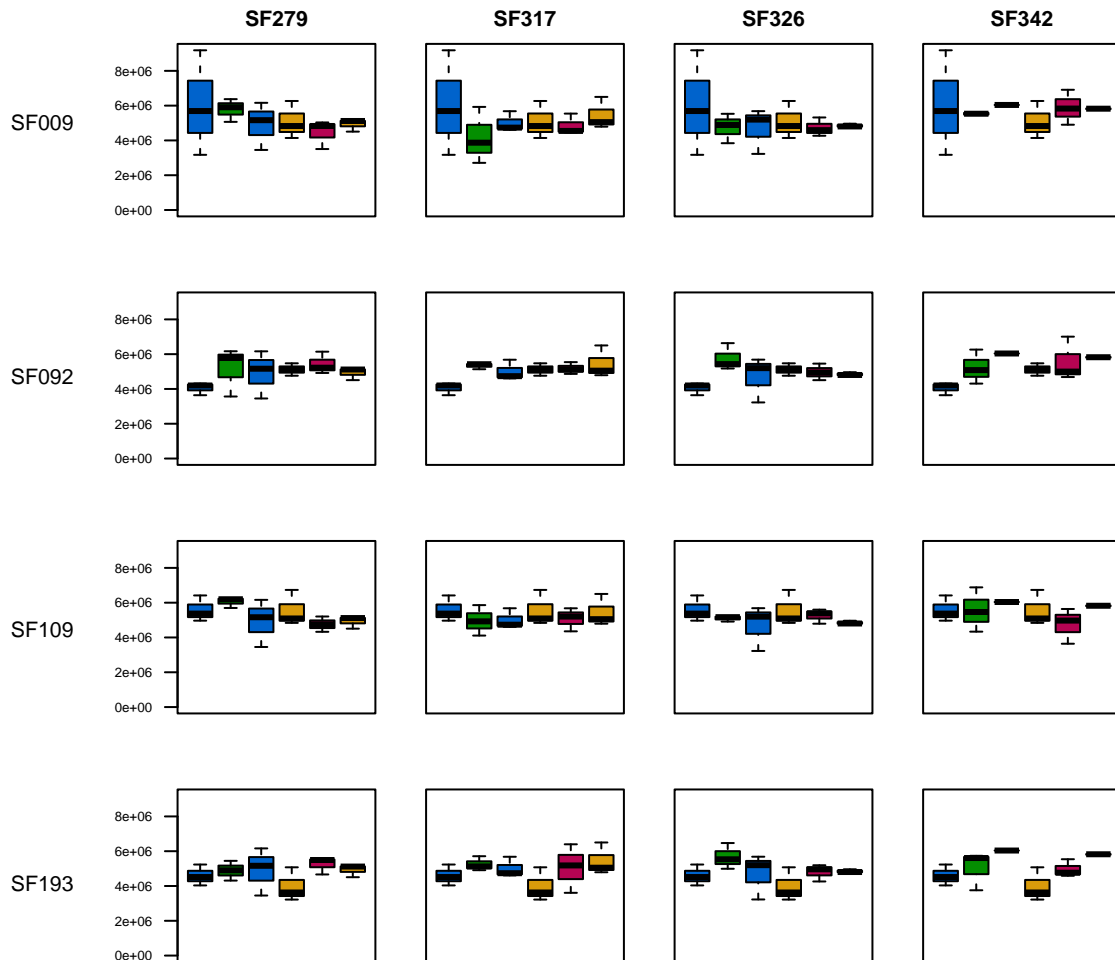



HanXRQChr17g0534961  
Putative lin-54 family

Parents WW  
Parents WD  
Hybrids WW  
Hybrids WD

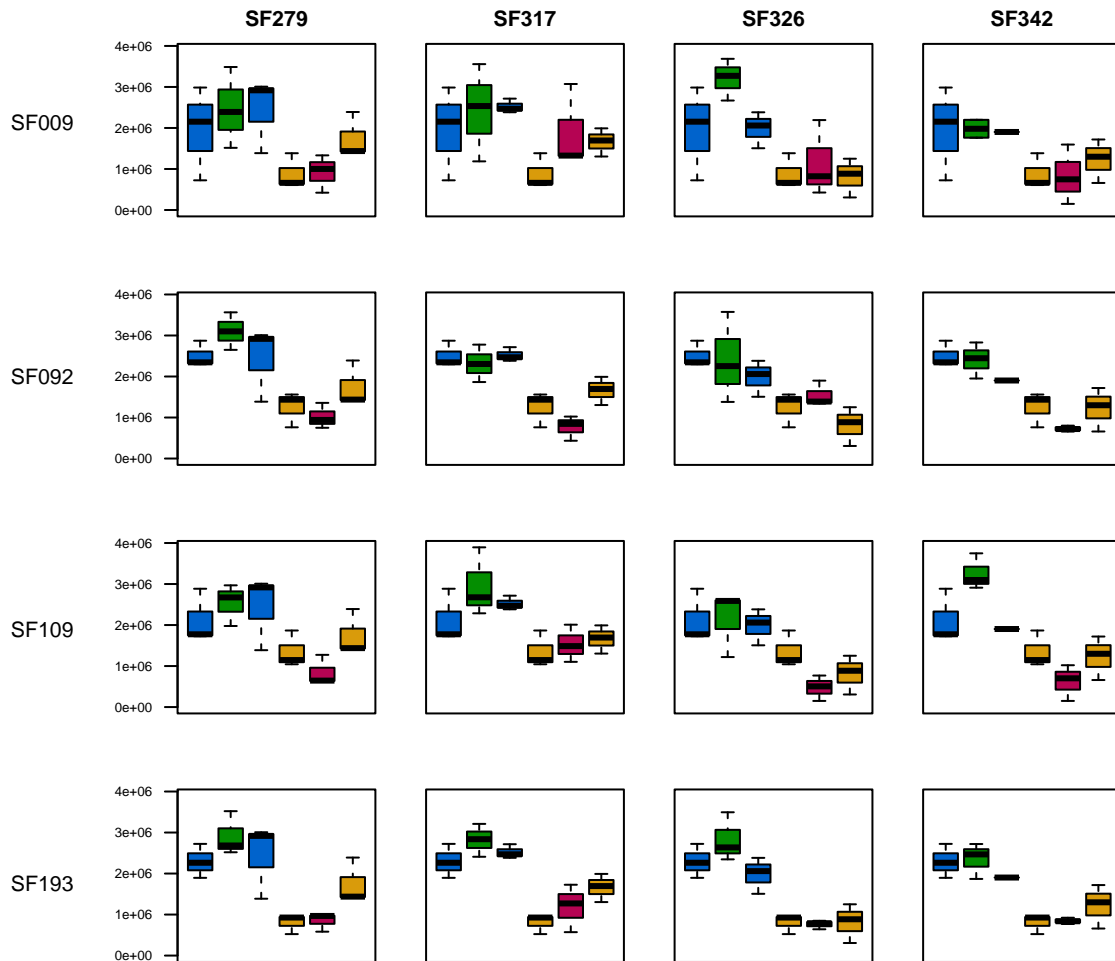

HanXRQChr16g0532191  
 Probable NADPH-dependent thioredoxin  
 reductase B

Parents WW  
 Parents WD  
 Hybrids WW  
 Hybrids WD

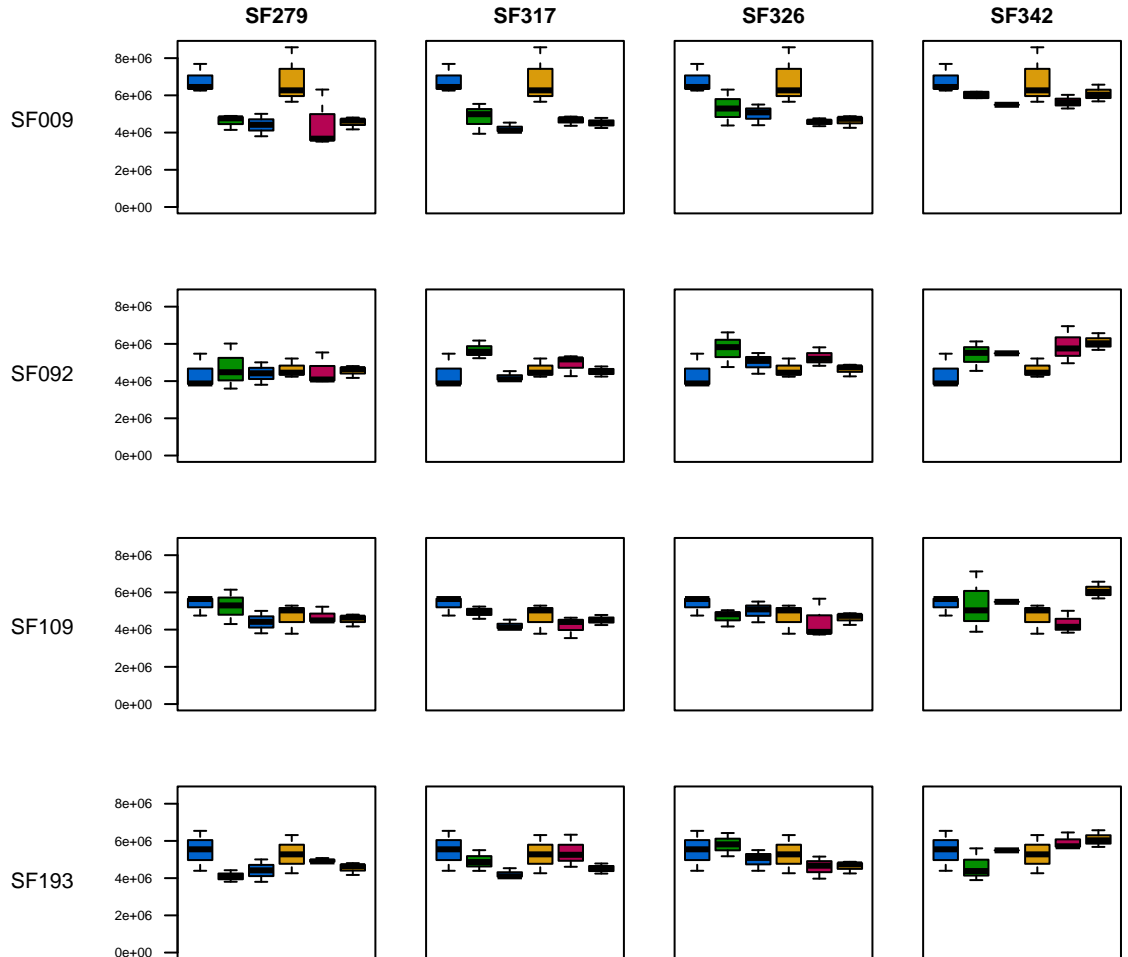

HanXRQChr01g0009201  
Probable transcription factor BTF3  
homolog 4

Parents WW  
Parents WD  
Hybrids WW  
Hybrids WD

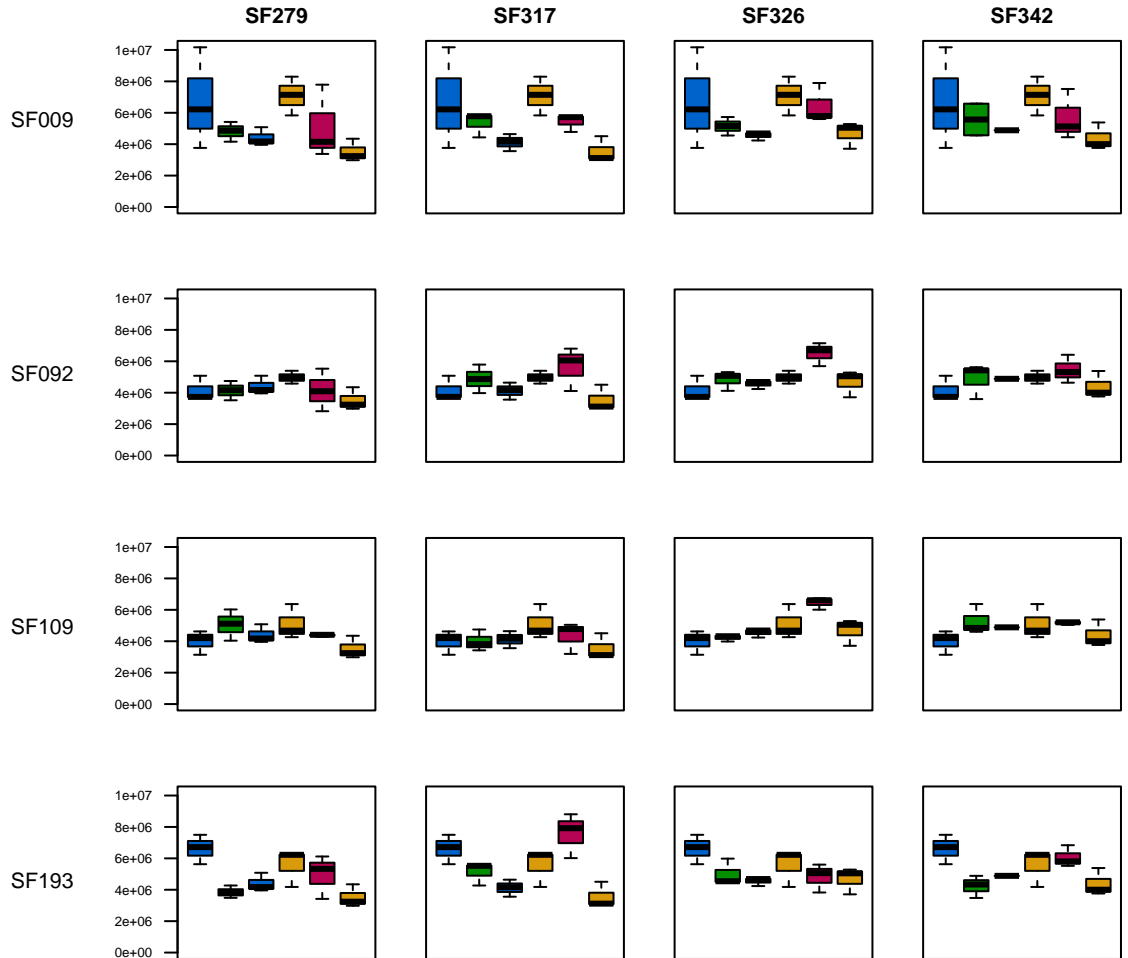

HanXRQChr02g0056711  
Probable enoyl-[acyl-carrier-protein]  
reductase [NADH], chloroplastic

Parents WW  
Parents WD  
Hybrids WW  
Hybrids WD

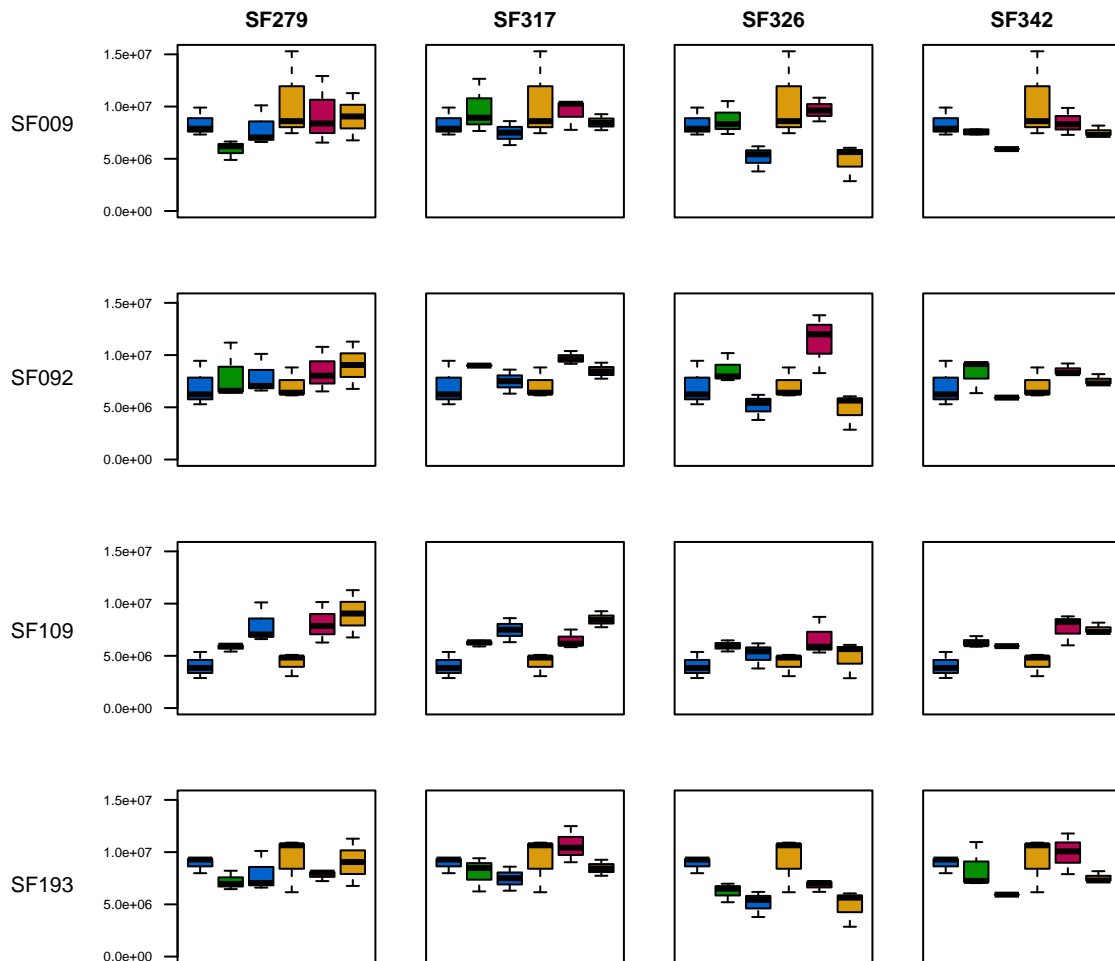

HanXRQChr03g0061571  
Probable glutamate synthase 1

- Parents WW
- Parents WD
- Hybrids WW
- Hybrids WD

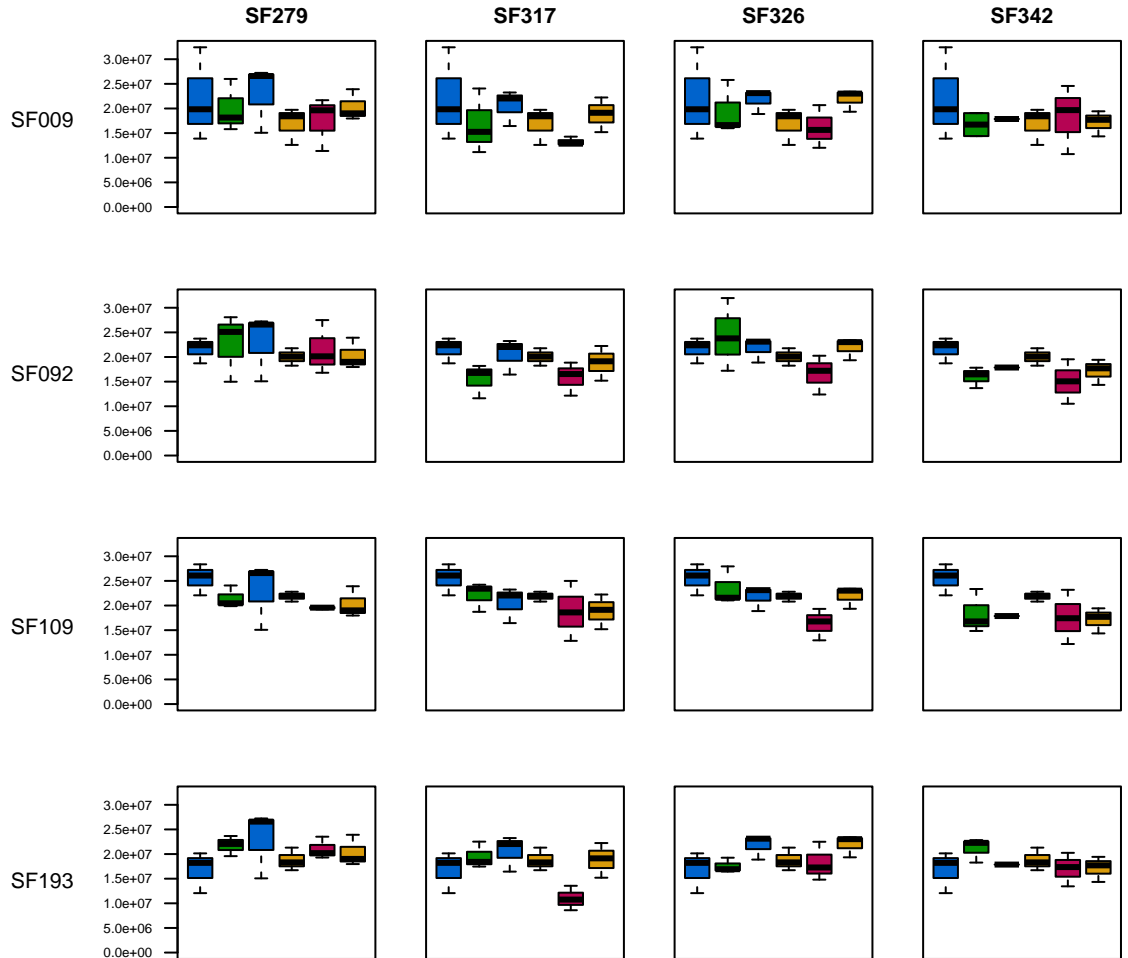

HanXRQChr11g0329151  
 Probable 20S proteasome beta subunit  
 PBB2

Parents WW  
 Parents WD  
 Hybrids WW  
 Hybrids WD

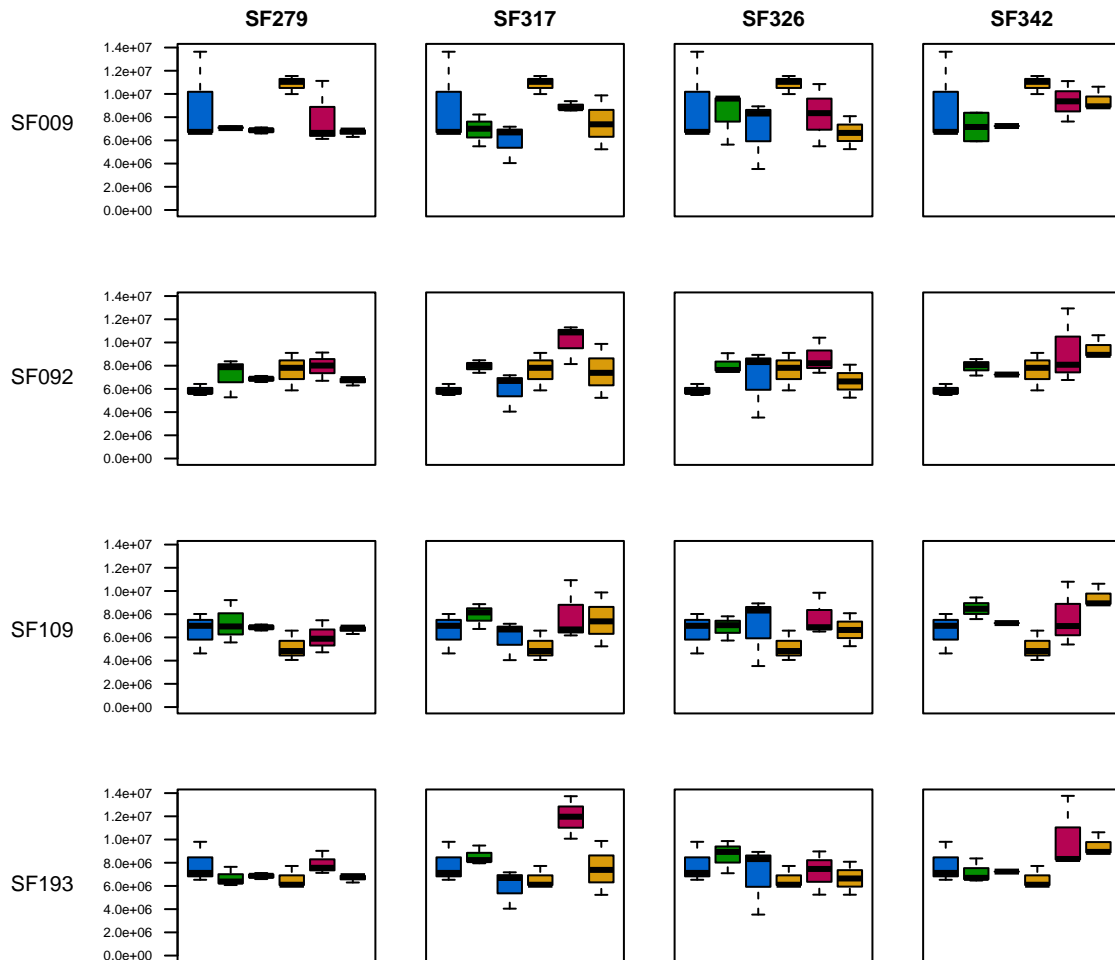

HanXRQChr08g0210001  
Probable catalytics;hydrolases

Parents WW  
Parents WD  
Hybrids WW  
Hybrids WD

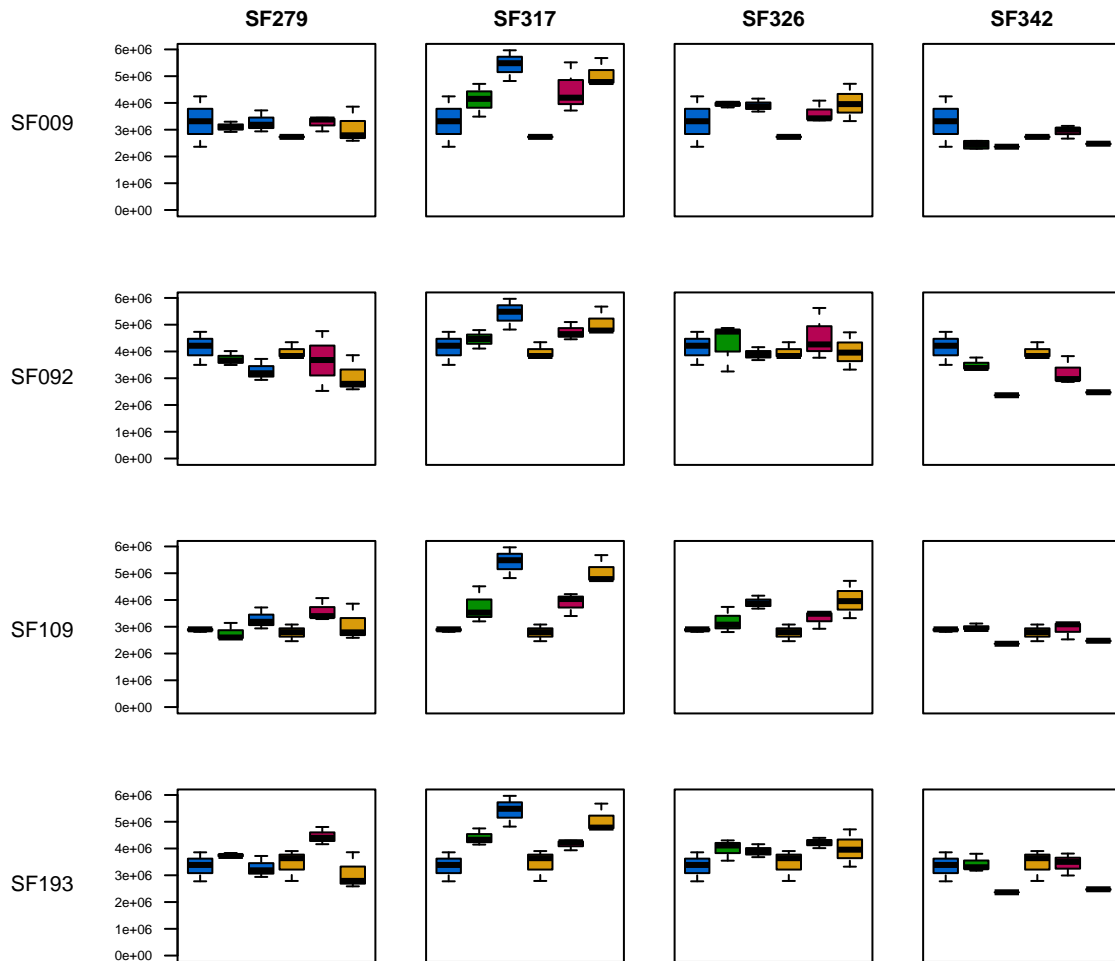

HanXRQChr09g0255191  
Probable 51 kDa subunit of complex I

Parents WW  
Parents WD  
Hybrids WW  
Hybrids WD

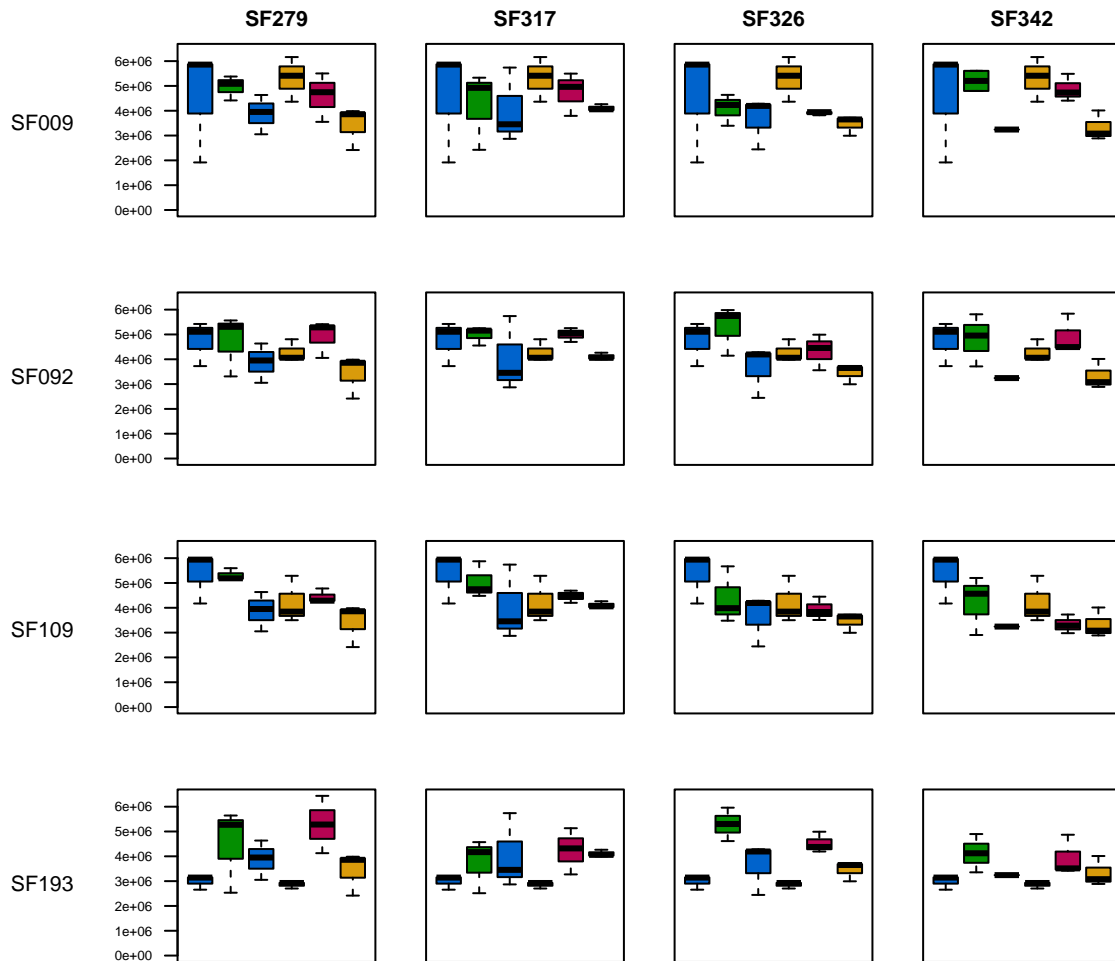



HanXRQChr16g0510111  
Probable D-3-phosphoglycerate  
dehydrogenase

Parents WW  
Parents WD  
Hybrids WW  
Hybrids WD

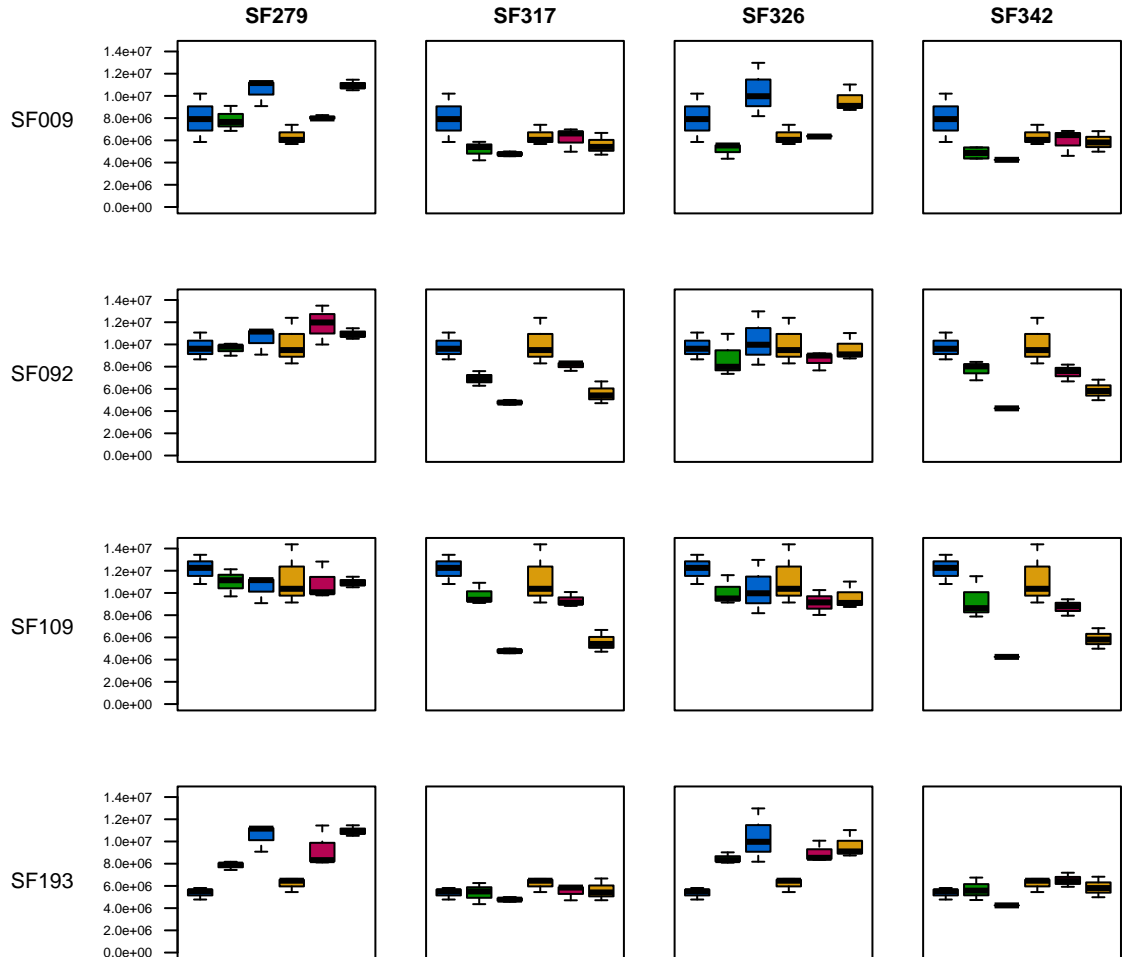

HanXRQChr05g0158151  
Probable alpha/beta-Hydrolases  
superfamily protein

Parents WW  
Parents WD  
Hybrids WW  
Hybrids WD

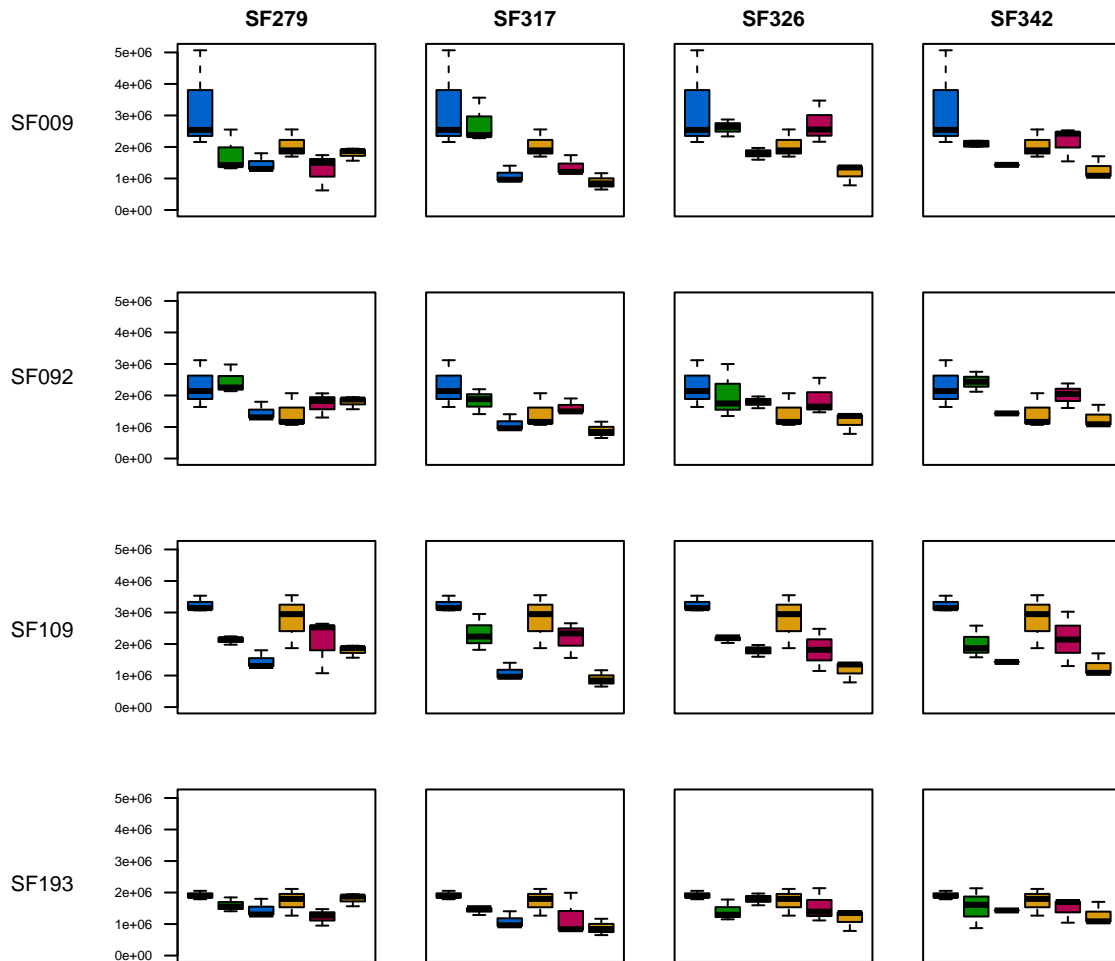

HanXRQChr07g0200441  
Uncharacterized conserved protein

Parents WW  
Parents WD  
Hybrids WW  
Hybrids WD

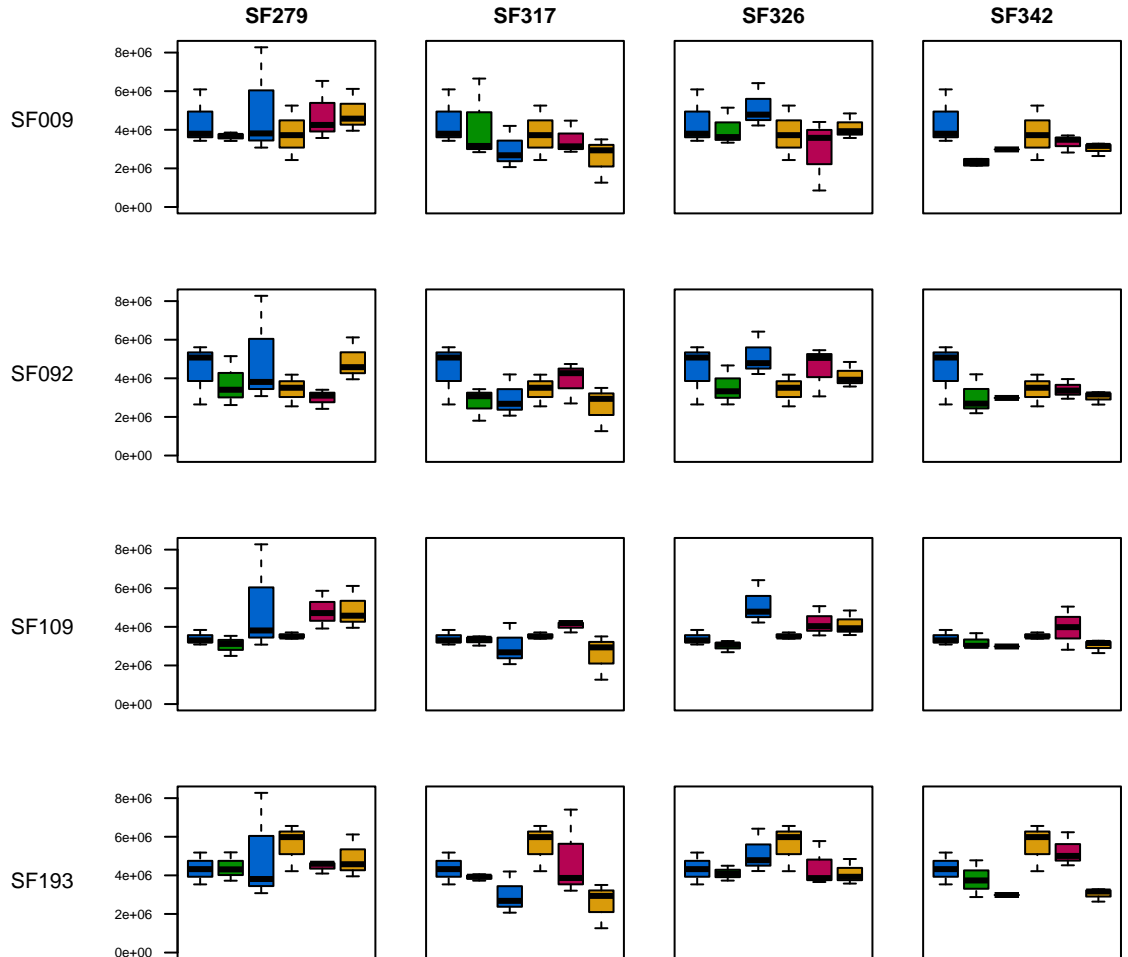

HanXRQChr12g0371231  
Probable germin-like protein 7

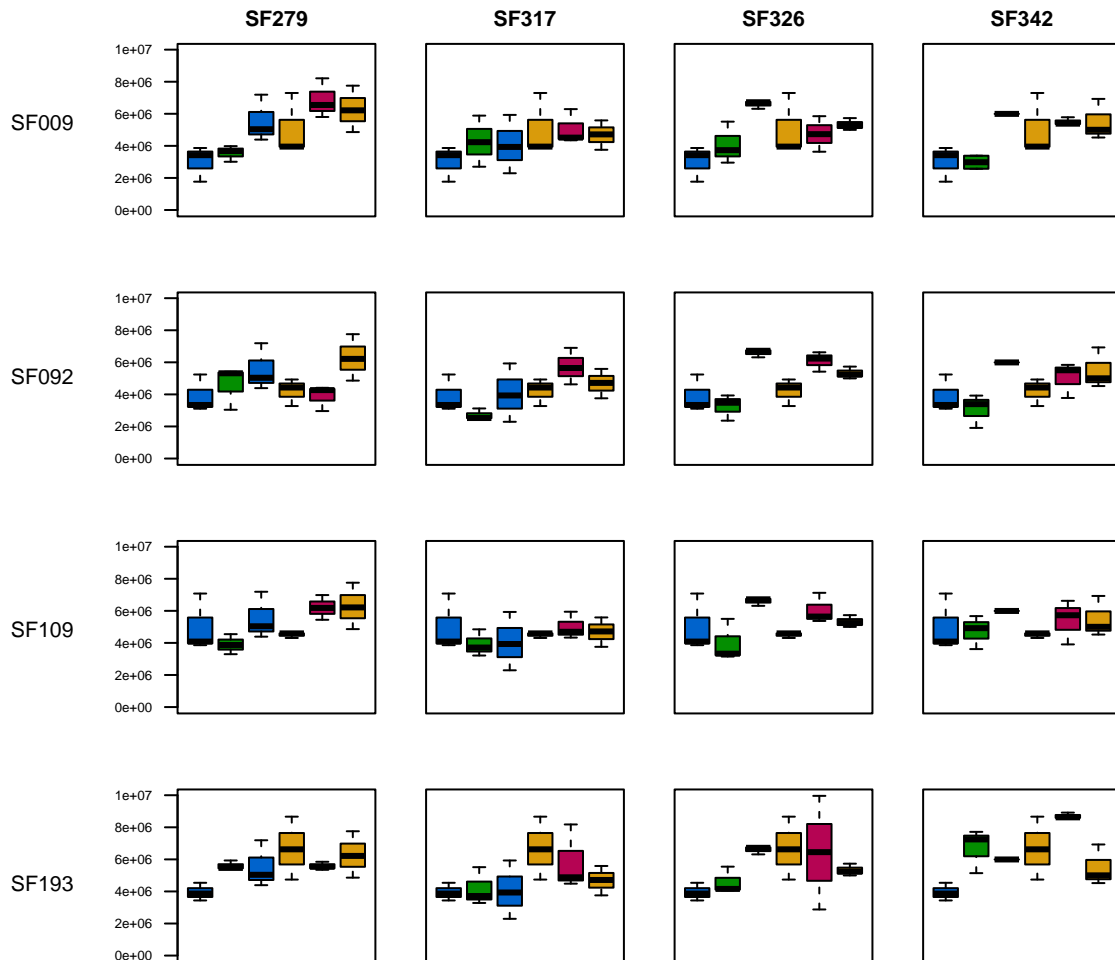

HanXRQChr16g0519651  
Probable RNA-binding (RRM/RBD/RNP  
motifs) family protein

Parents WW  
Parents WD  
Hybrids WW  
Hybrids WD

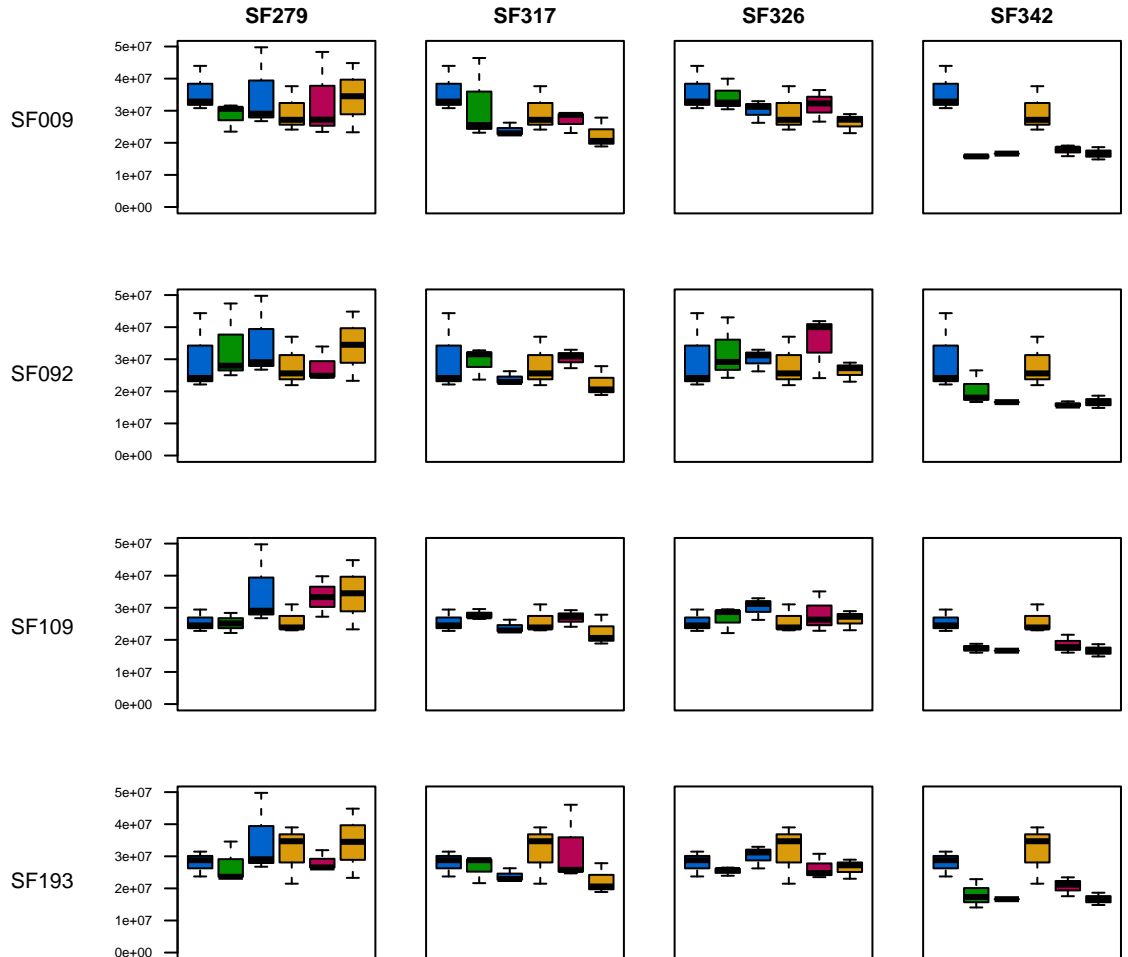

HanXRQChr15g0484391  
Uncharacterized conserved protein

- Parents WW
- Parents WD
- Hybrids WW
- Hybrids WD

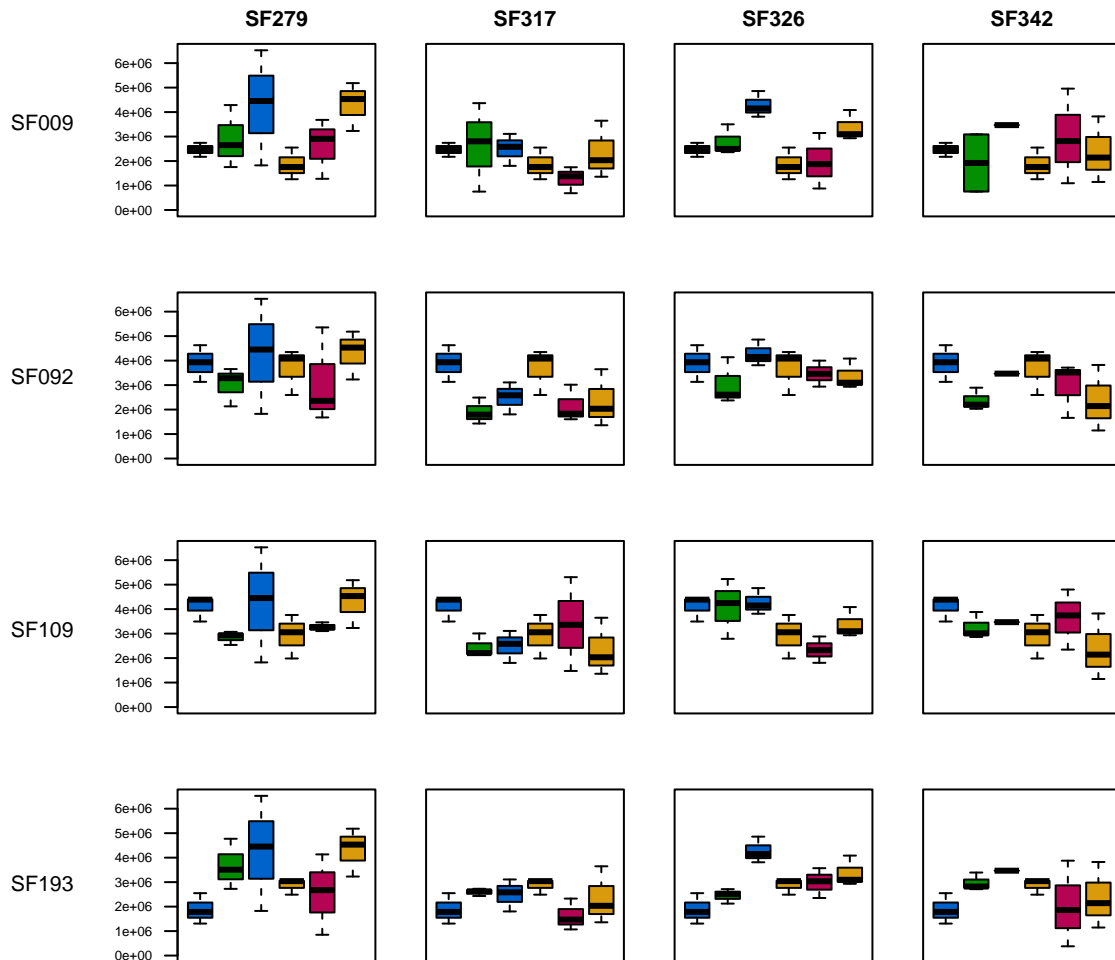

HanXRQChr02g0049231  
Putative actin family

Parents WW  
Parents WD  
Hybrids WW  
Hybrids WD

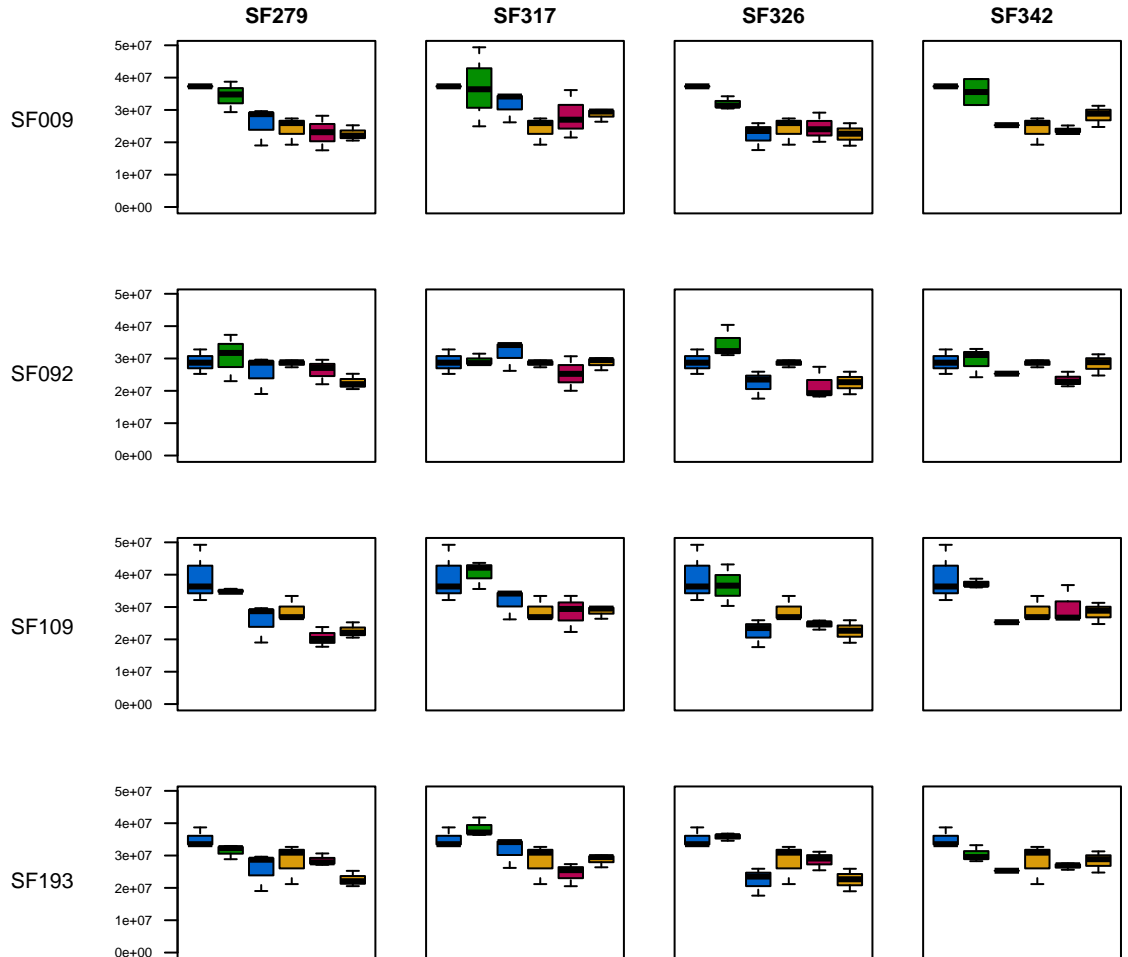

HanXRQChr02g0046951  
Probable 14-3-3-like protein D

Parents WW  
Parents WD  
Hybrids WW  
Hybrids WD

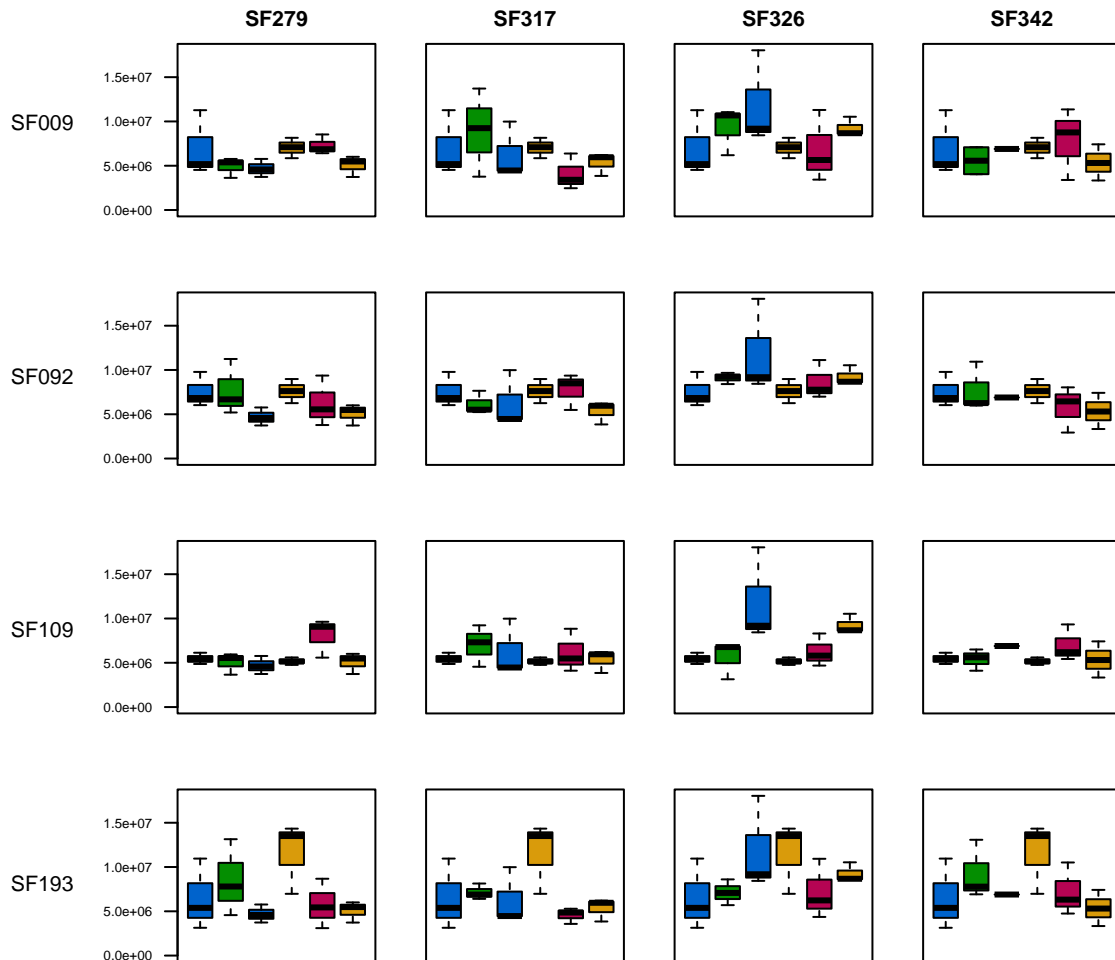



HanXRQChr10g0307251  
 Probable CLP protease proteolytic  
 subunit 6

Parents WW  
 Parents WD  
 Hybrids WW  
 Hybrids WD

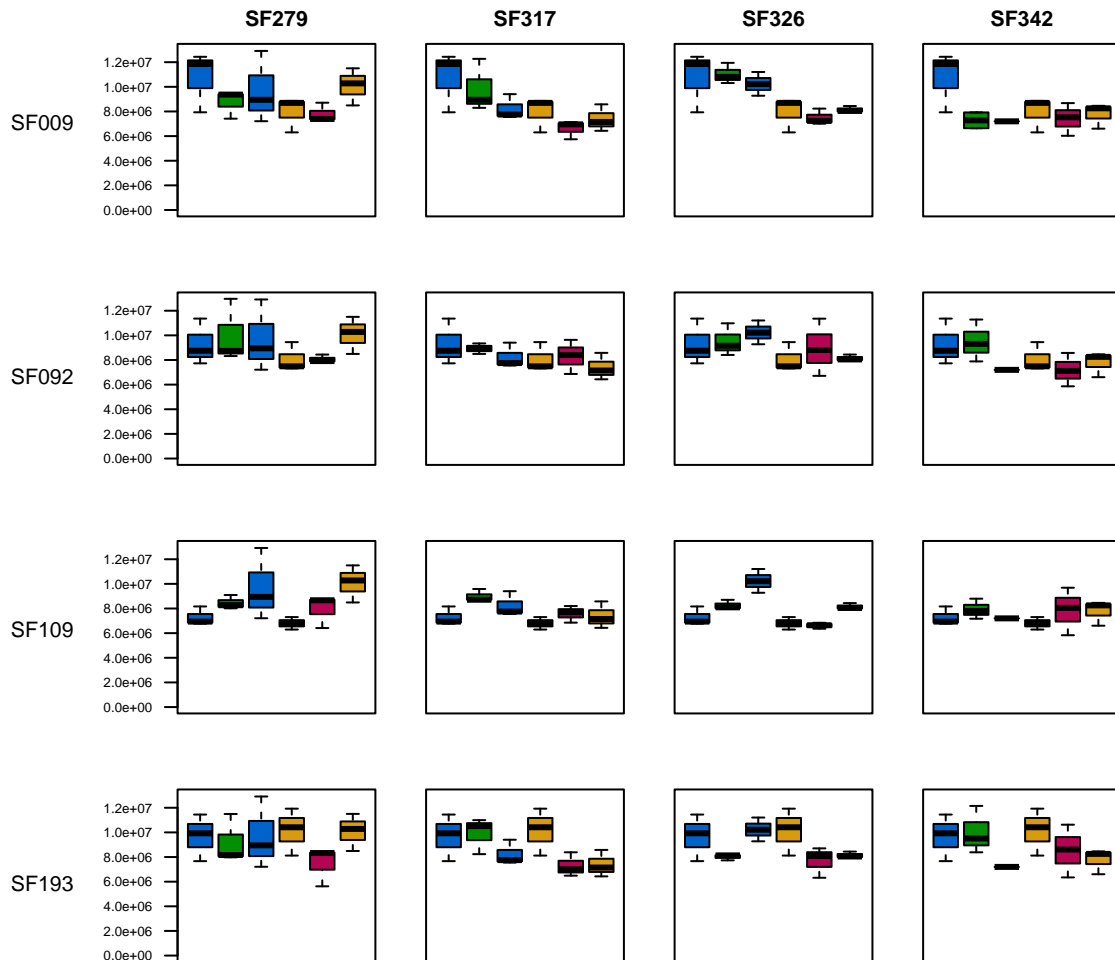

HanXRQChr13g0389071  
Putative triosephosphate isomerase;  
Aldolase-type TIM barrel

Parents WW  
Parents WD  
Hybrids WW  
Hybrids WD

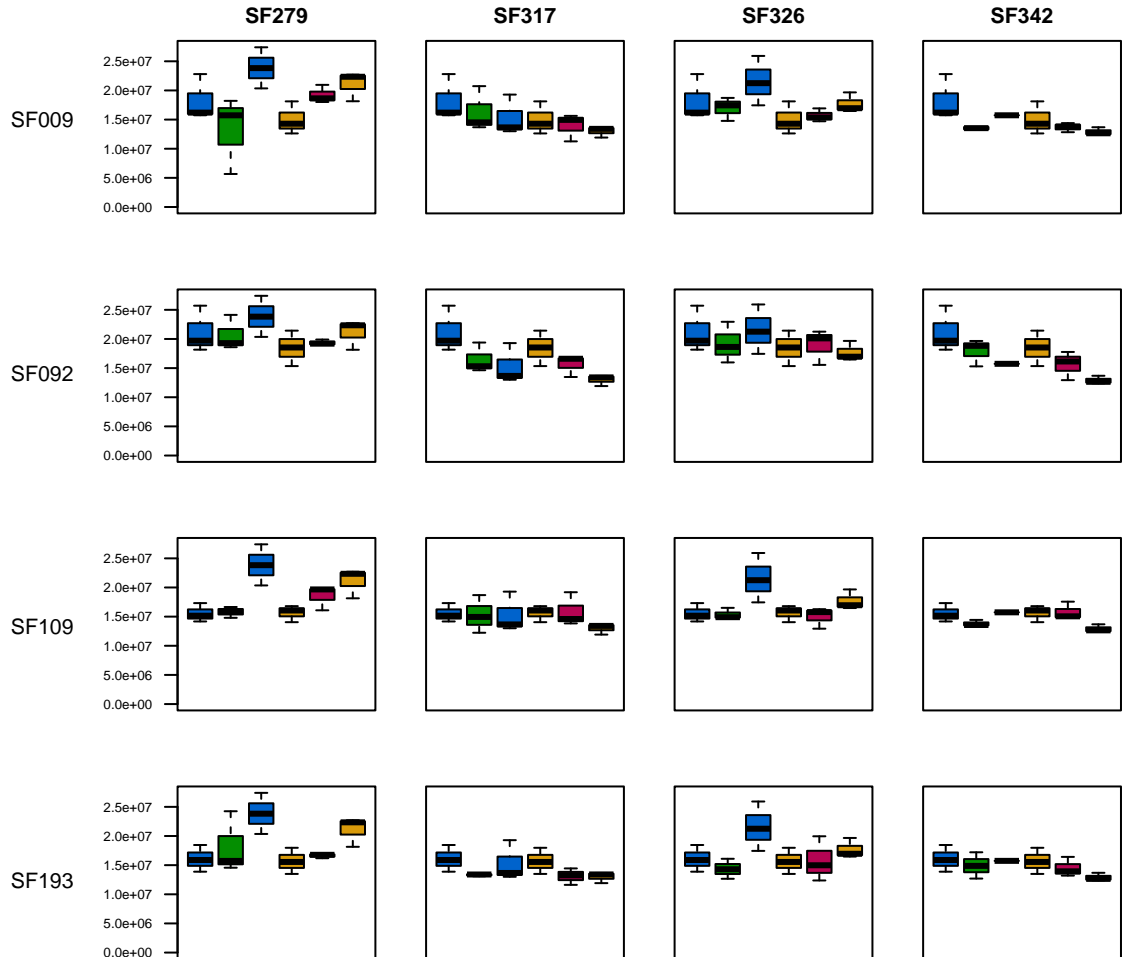

HanXRQChr06g0184671  
Probable eukaryotic aspartyl protease  
family protein

Parents WW  
Parents WD  
Hybrids WW  
Hybrids WD

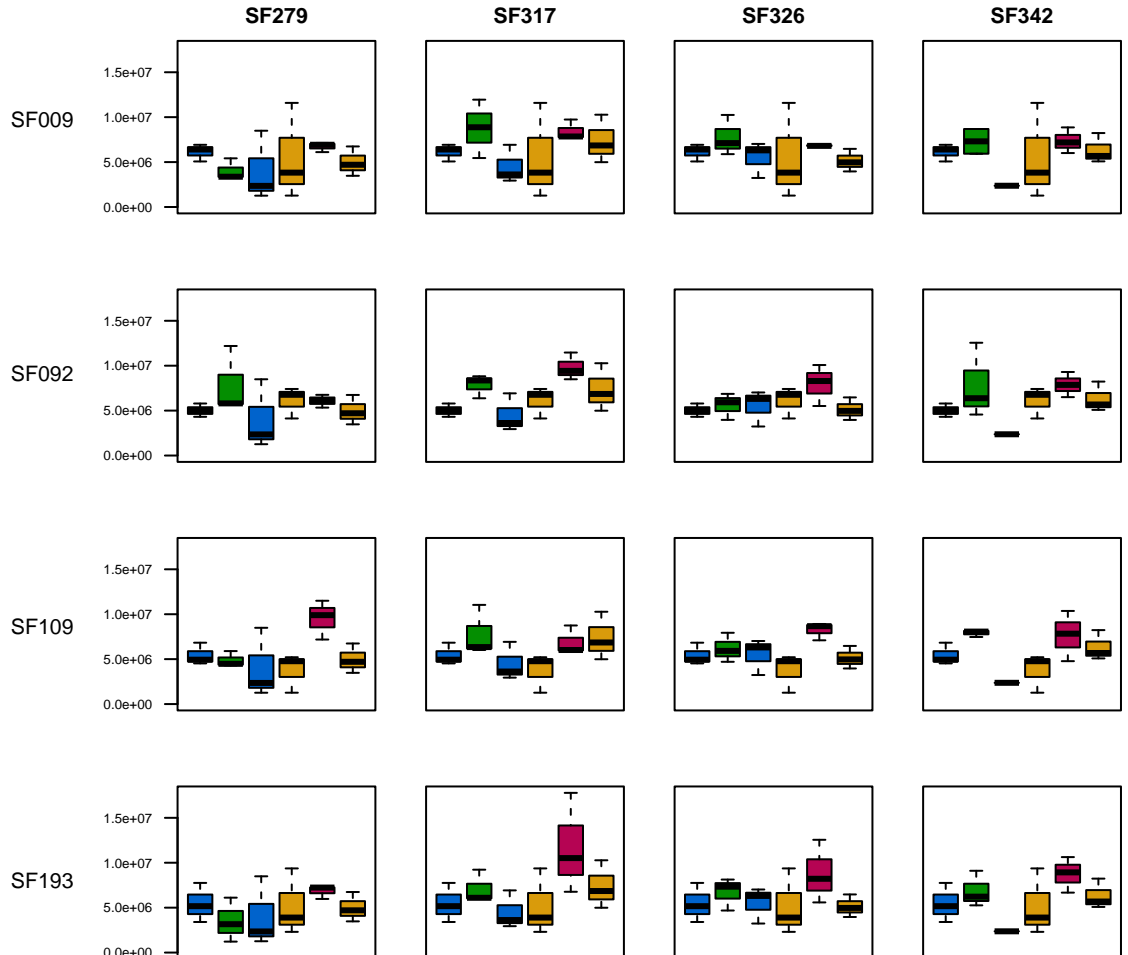

HanXRQChr17g0564001  
Probable GTP binding

Parents WW  
Parents WD  
Hybrids WW  
Hybrids WD

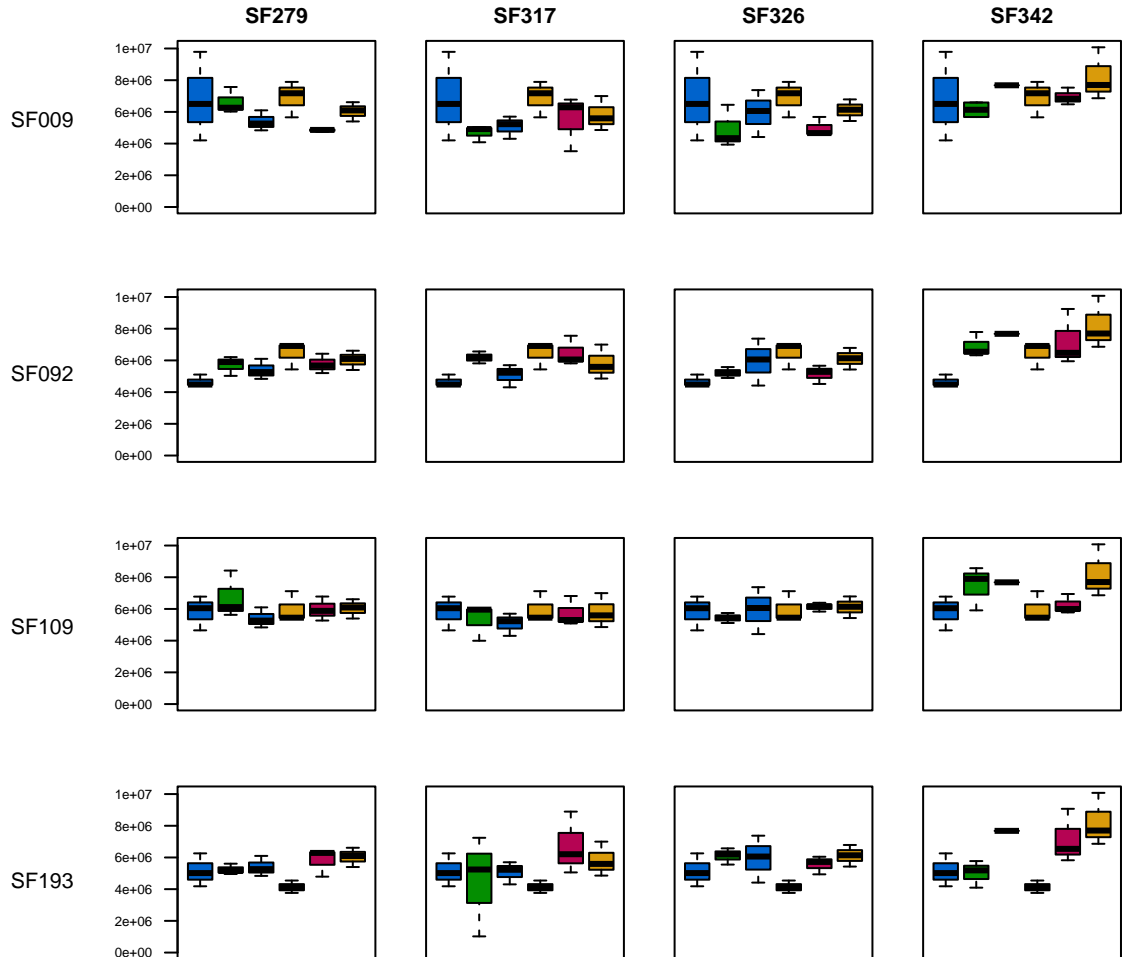

HanXRQChr17g0549011  
Uncharacterized conserved protein

- Parents WW
- Parents WD
- Hybrids WW
- Hybrids WD

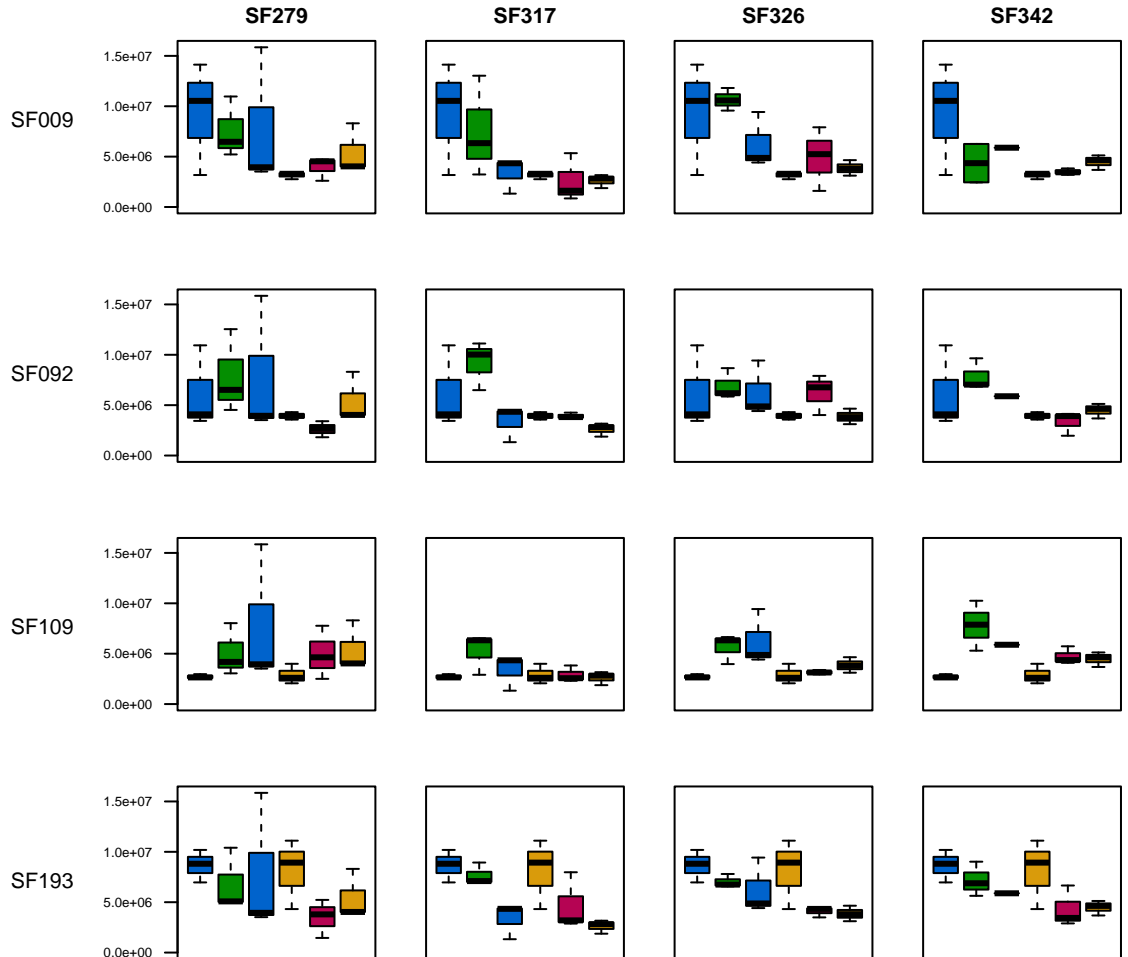

HanXRQChr14g0433361  
Putative NAD(P)H-quinone oxidoreductase  
subunit O

Parents WW  
Parents WD  
Hybrids WW  
Hybrids WD

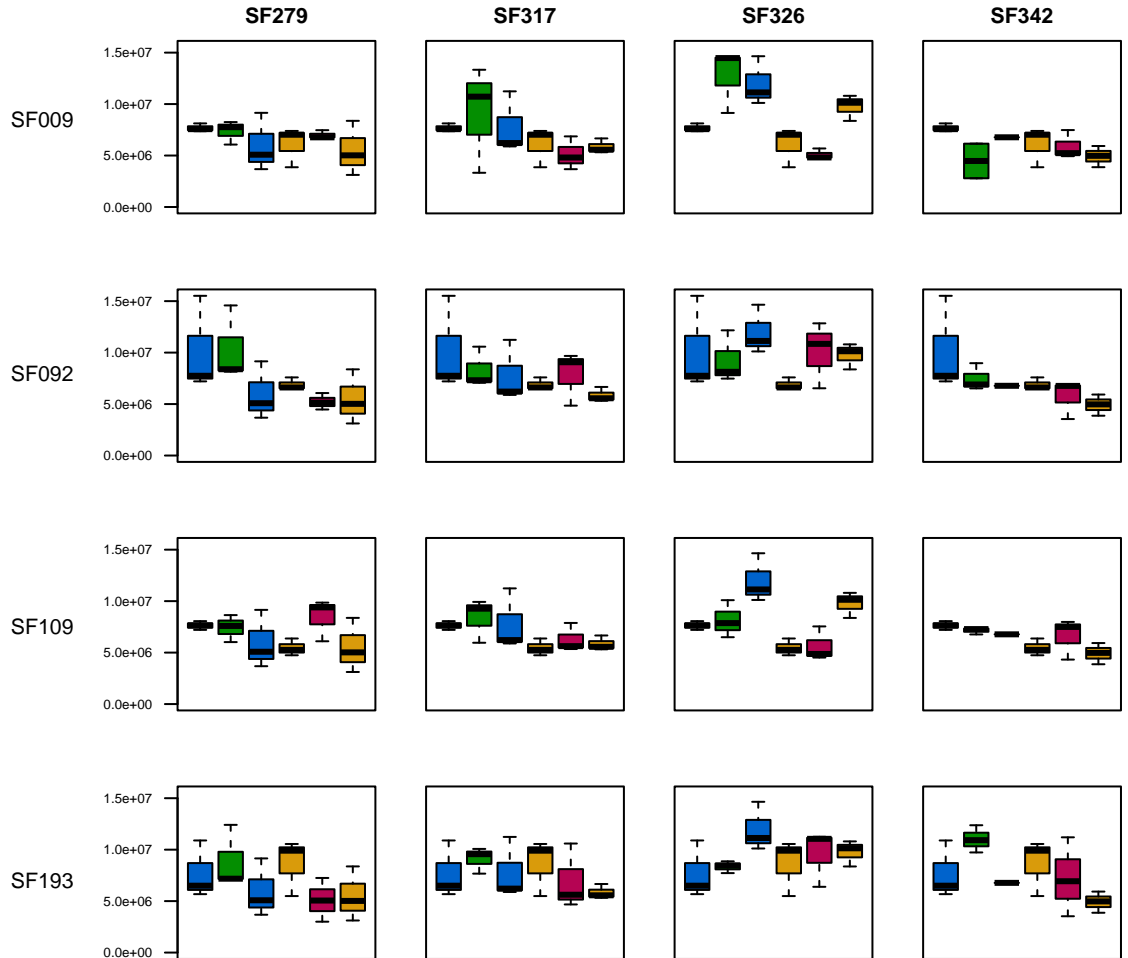

HanXRQChr10g0319951  
Probable aldehyde dehydrogenase 6B2

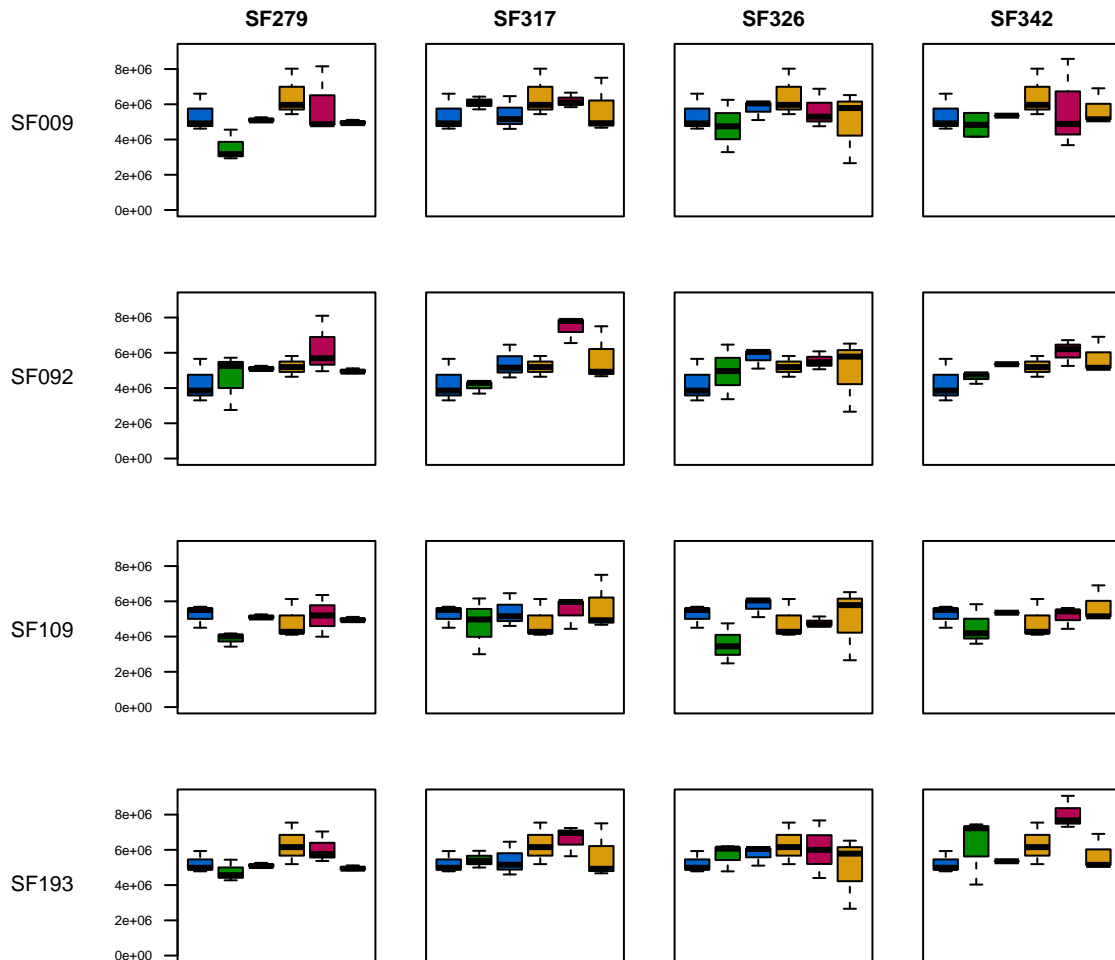

HanXRQChr16g0505051  
Probable NAD(P)-binding Rossmann-fold  
superfamily protein

Parents WW  
Parents WD  
Hybrids WW  
Hybrids WD

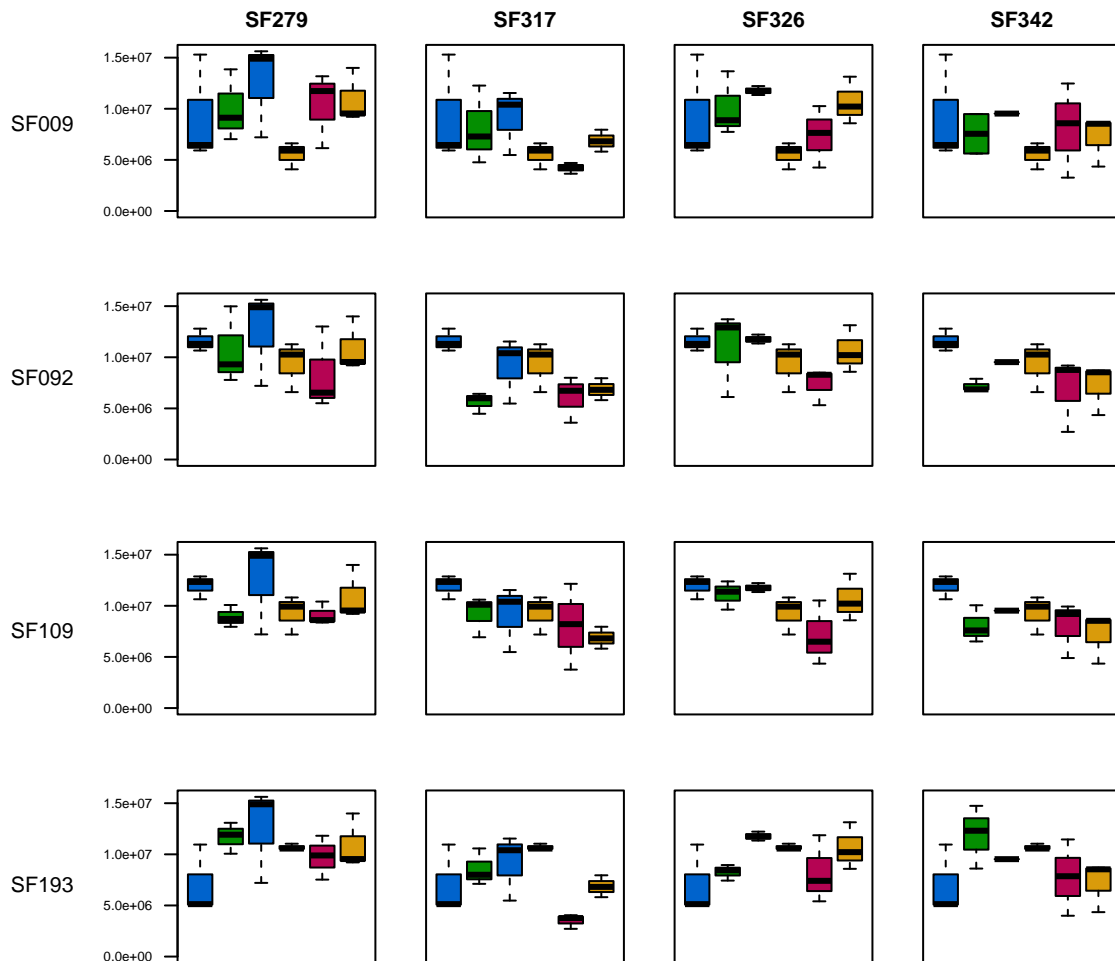



HanXRQChr10g0318741  
 Putative ribosomal protein S1;  
 Translation elongation factor EFTs/EF1B

Parents WW  
 Parents WD  
 Hybrids WW  
 Hybrids WD

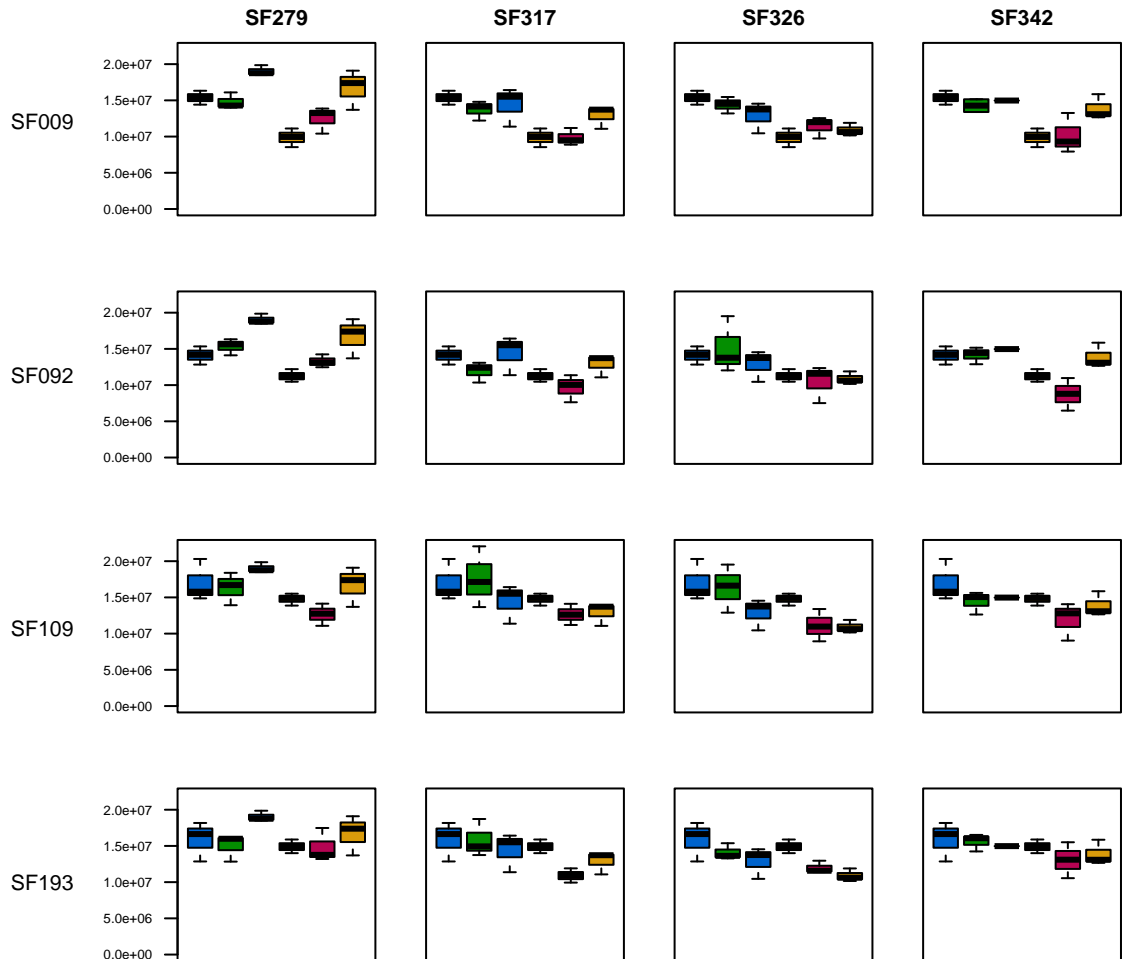

HanXRQChr04g0099681  
Probable low PSII Accumulation 3

Parents WW  
Parents WD  
Hybrids WW  
Hybrids WD

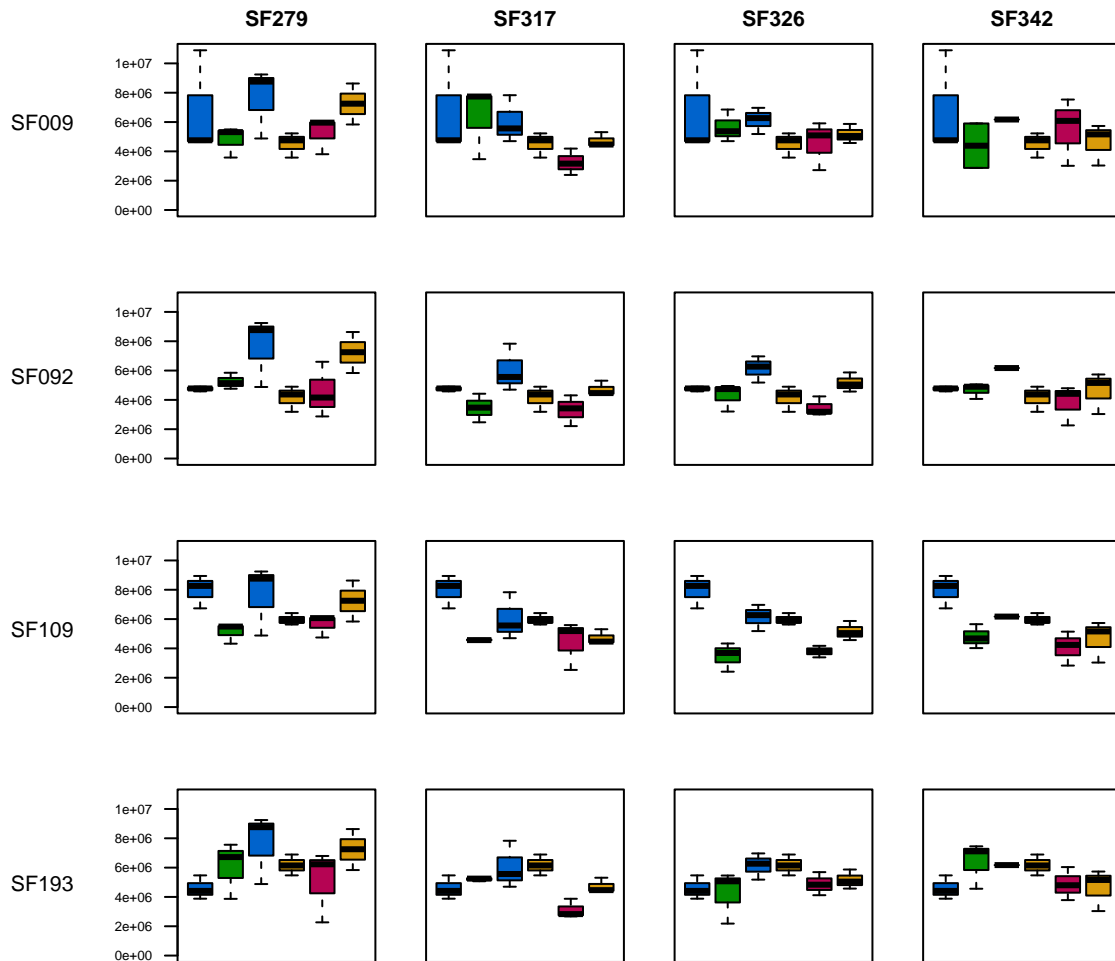

HanXRQChr13g0412371  
Uncharacterized protein, supported by  
expression data

Parents WW  
Parents WD  
Hybrids WW  
Hybrids WD

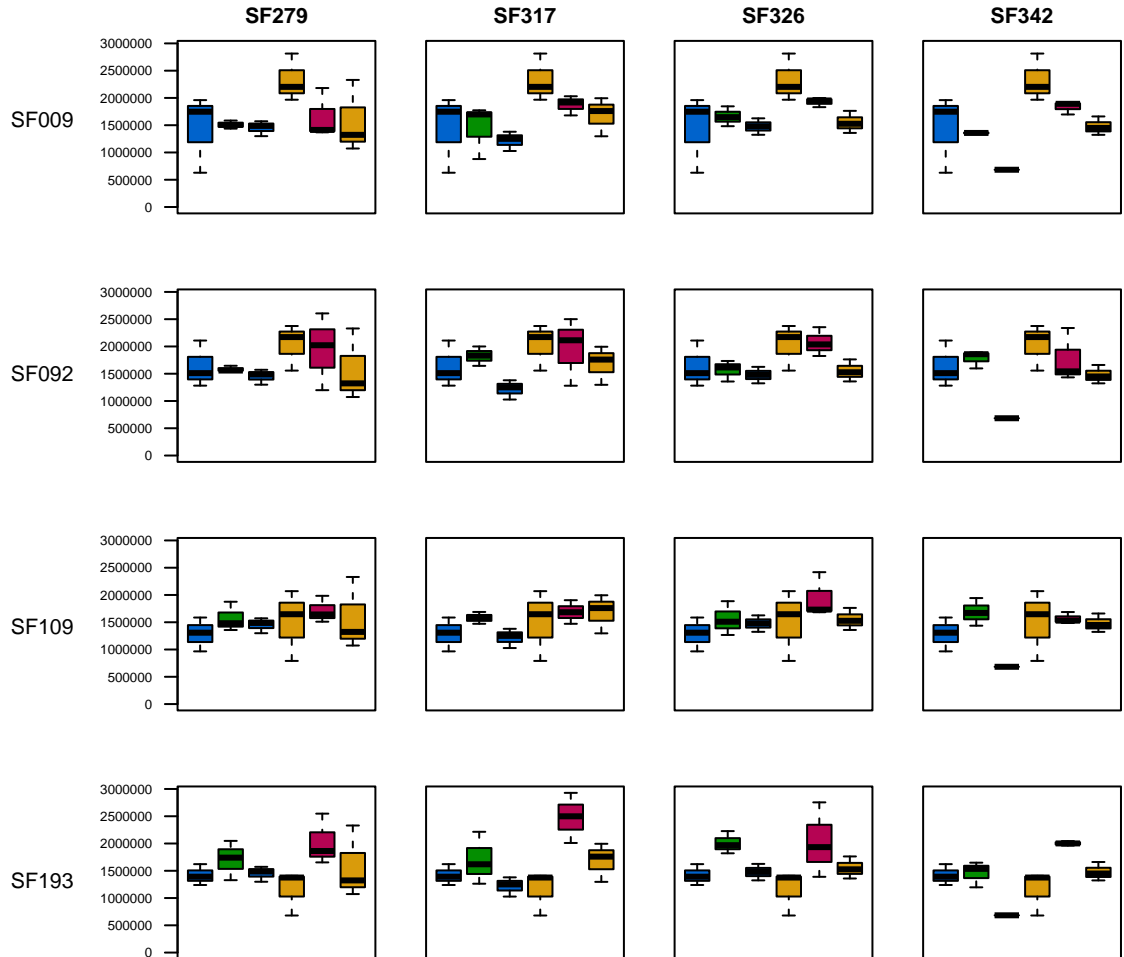

HanXRQChr06g0169031  
Probable protein kinase superfamily  
protein

Parents WW  
Parents WD  
Hybrids WW  
Hybrids WD

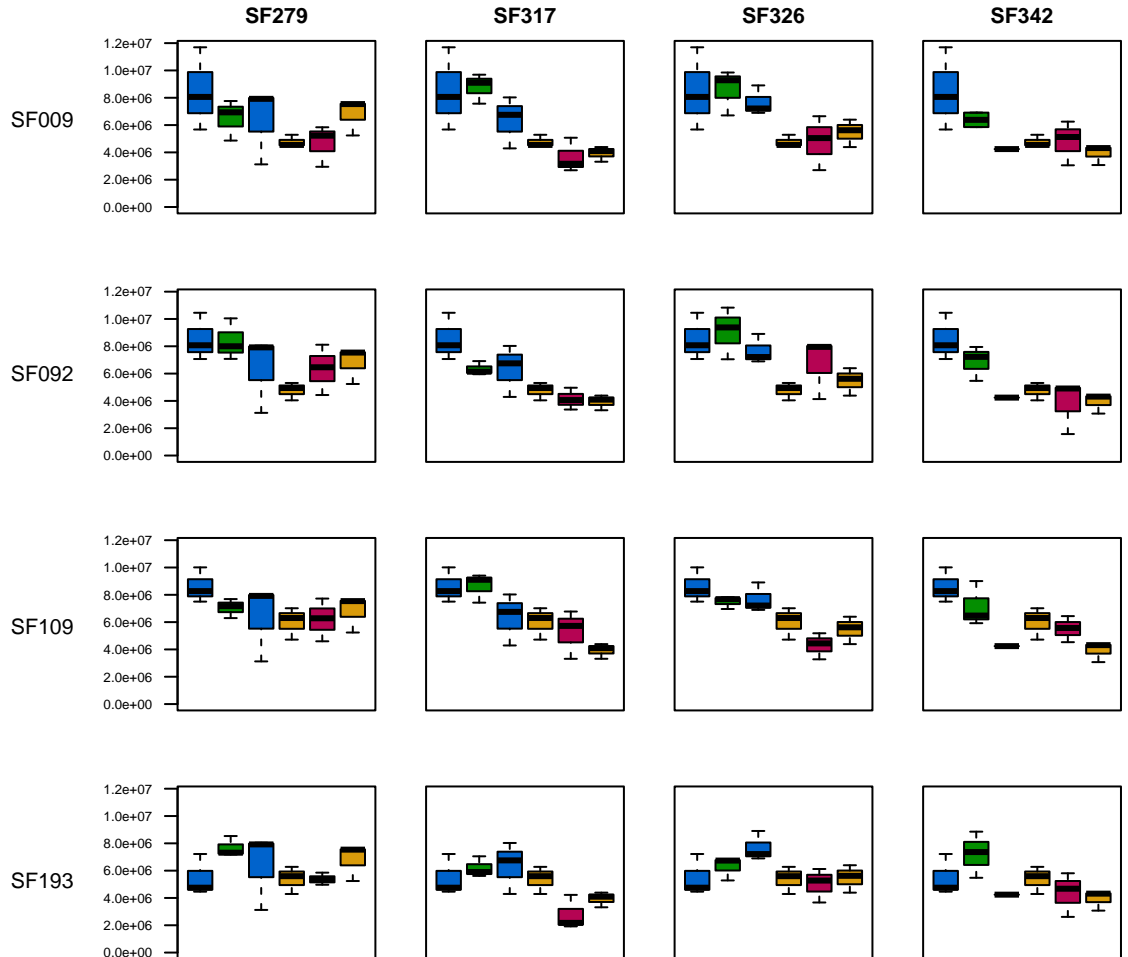

HanXRQChr14g0456211  
Probable phosphoglucan phosphatase  
DSP4, amyloplastic

Parents WW  
Parents WD  
Hybrids WW  
Hybrids WD

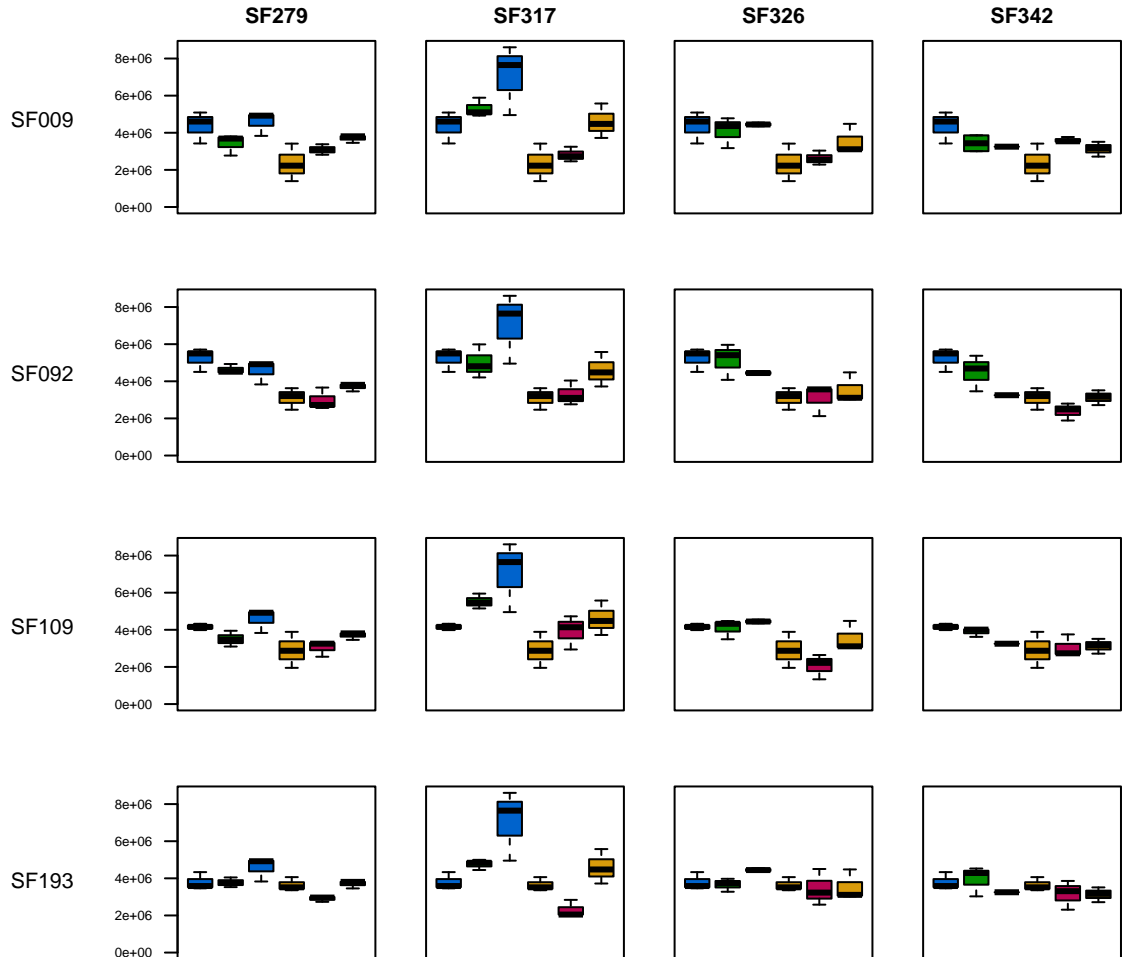

HanXRQChr03g0083551  
 Probable AMP-dependent synthetase and  
 ligase family protein

■ Parents WW  
 ■ Parents WD  
 ■ Hybrids WW  
 ■ Hybrids WD

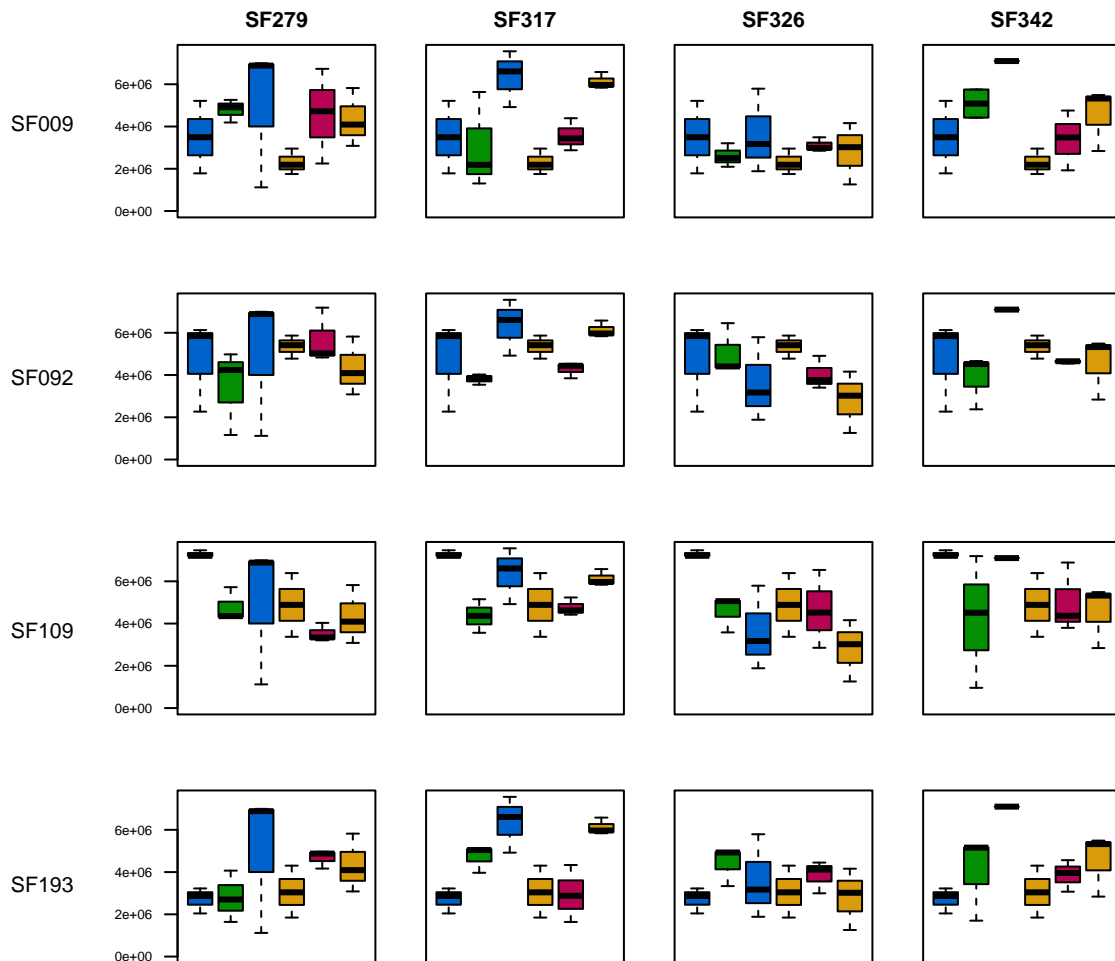

HanXRQChr12g0359681  
Probable threonine synthase,  
chloroplastic

Parents WW  
Parents WD  
Hybrids WW  
Hybrids WD

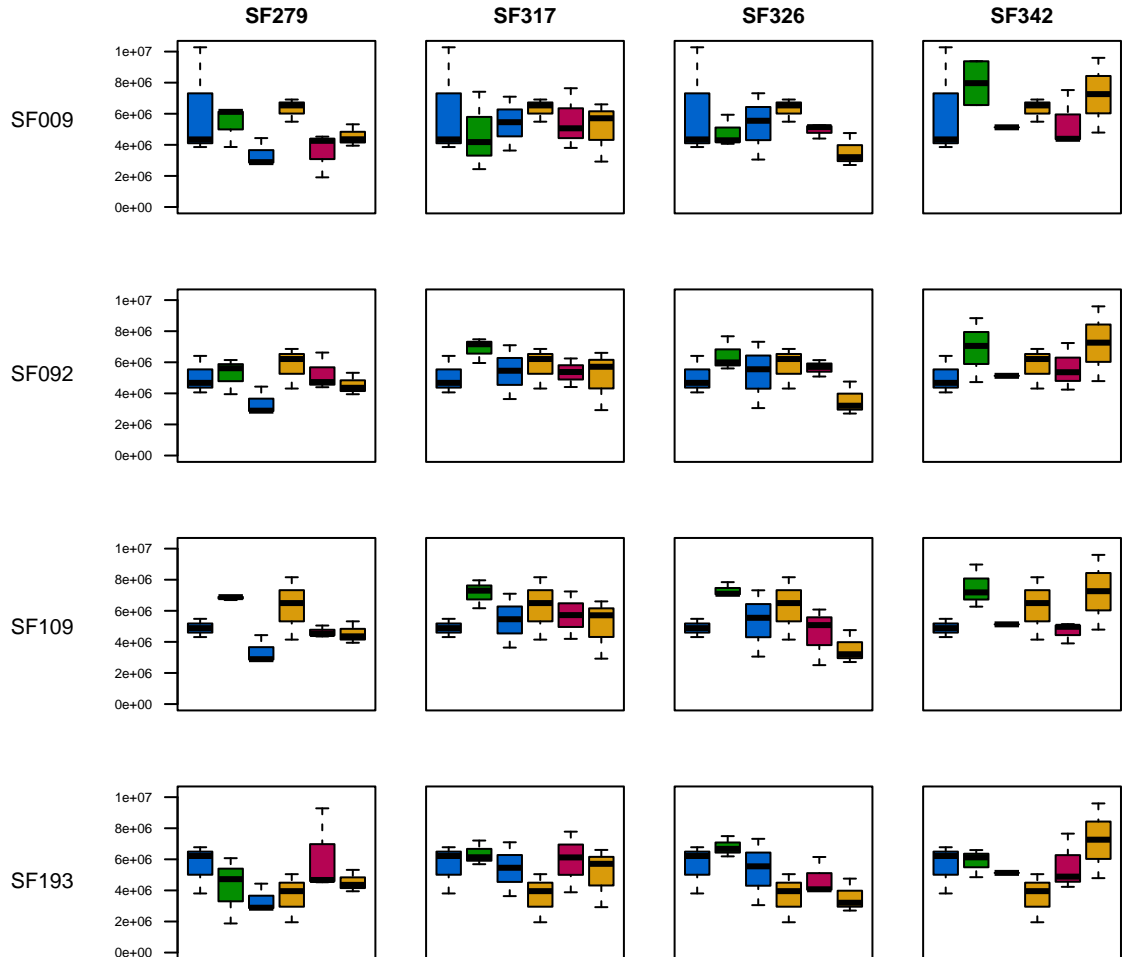

HanXRQChr10g0311531  
Probable ATP synthase subunit epsilon,  
mitochondrial

Parents WW  
Parents WD  
Hybrids WW  
Hybrids WD

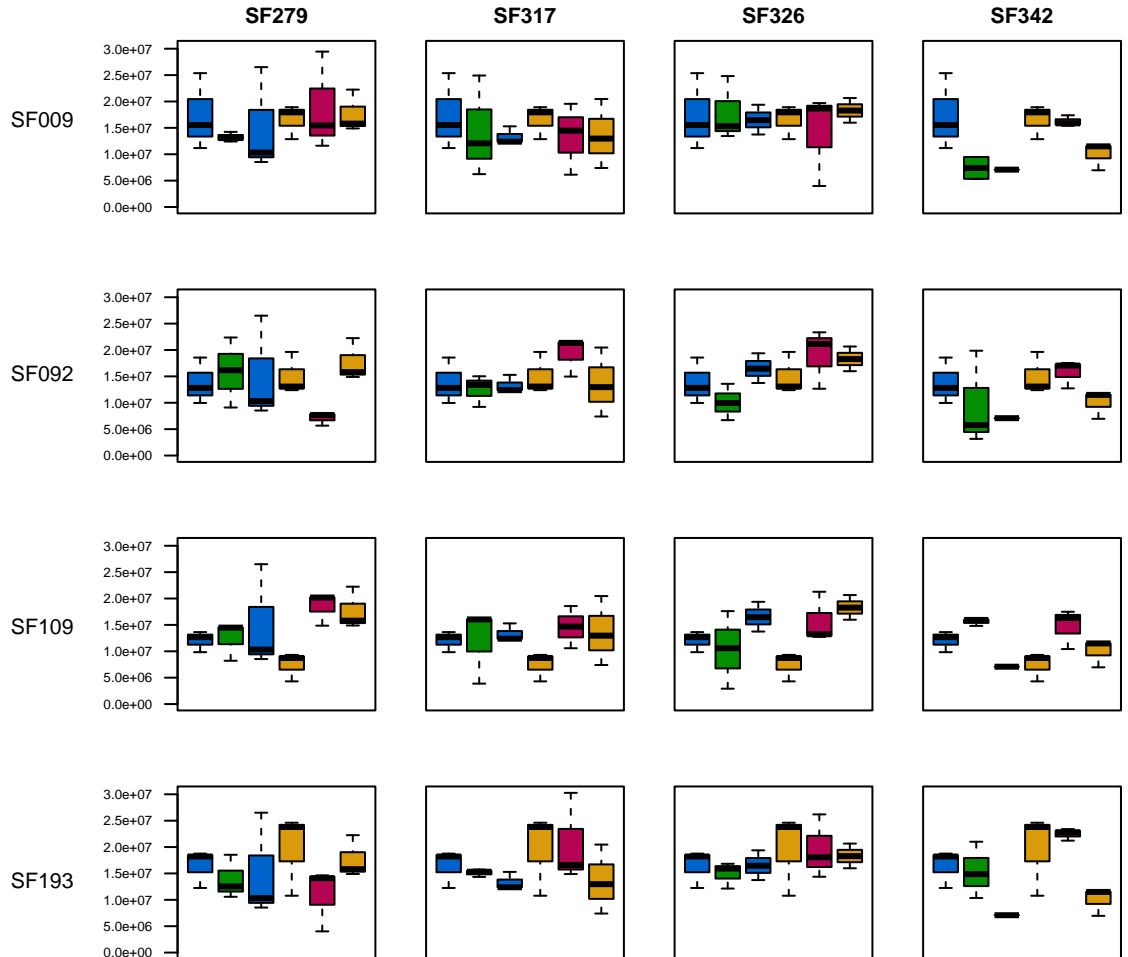



HanXRQChr15g0478571  
Putative cold-shock protein,  
DNA-binding; Nucleic acid-binding, OB-fold

Parents WW  
Parents WD  
Hybrids WW  
Hybrids WD

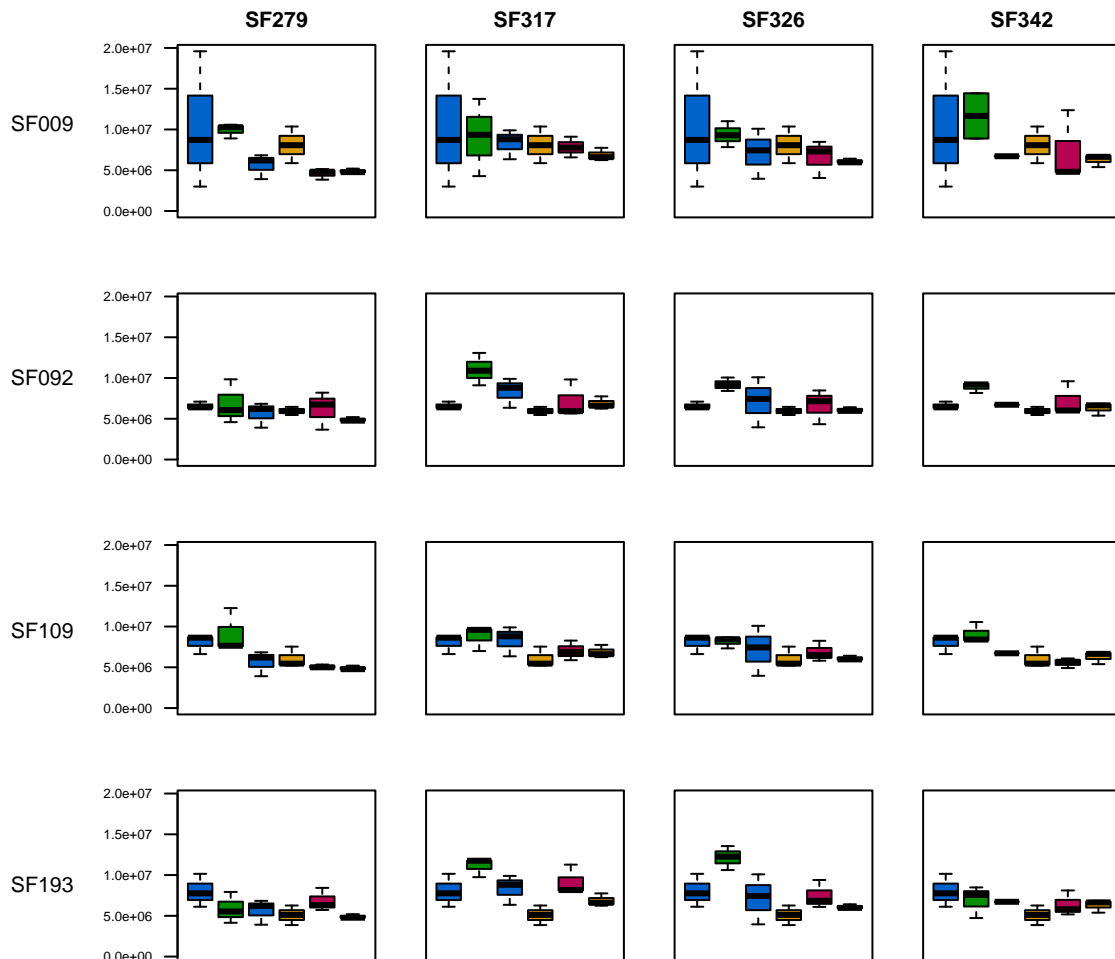

HanXRQChr10g0286461  
Probable protein translocase subunit  
SecA, chloroplastic

Parents WW  
Parents WD  
Hybrids WW  
Hybrids WD

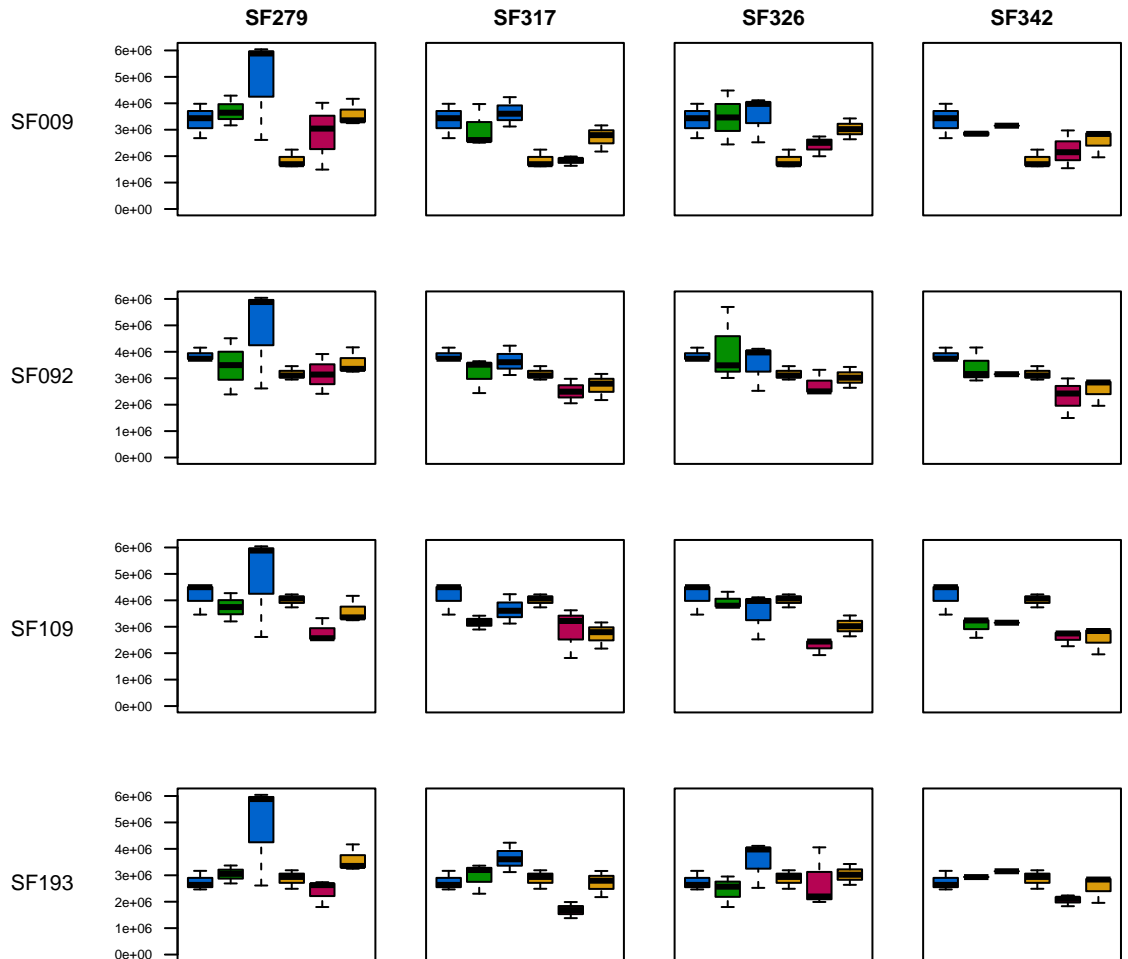

HanXRQChr10g0280311  
Probable glutaredoxin family protein

Parents WW  
Parents WD  
Hybrids WW  
Hybrids WD

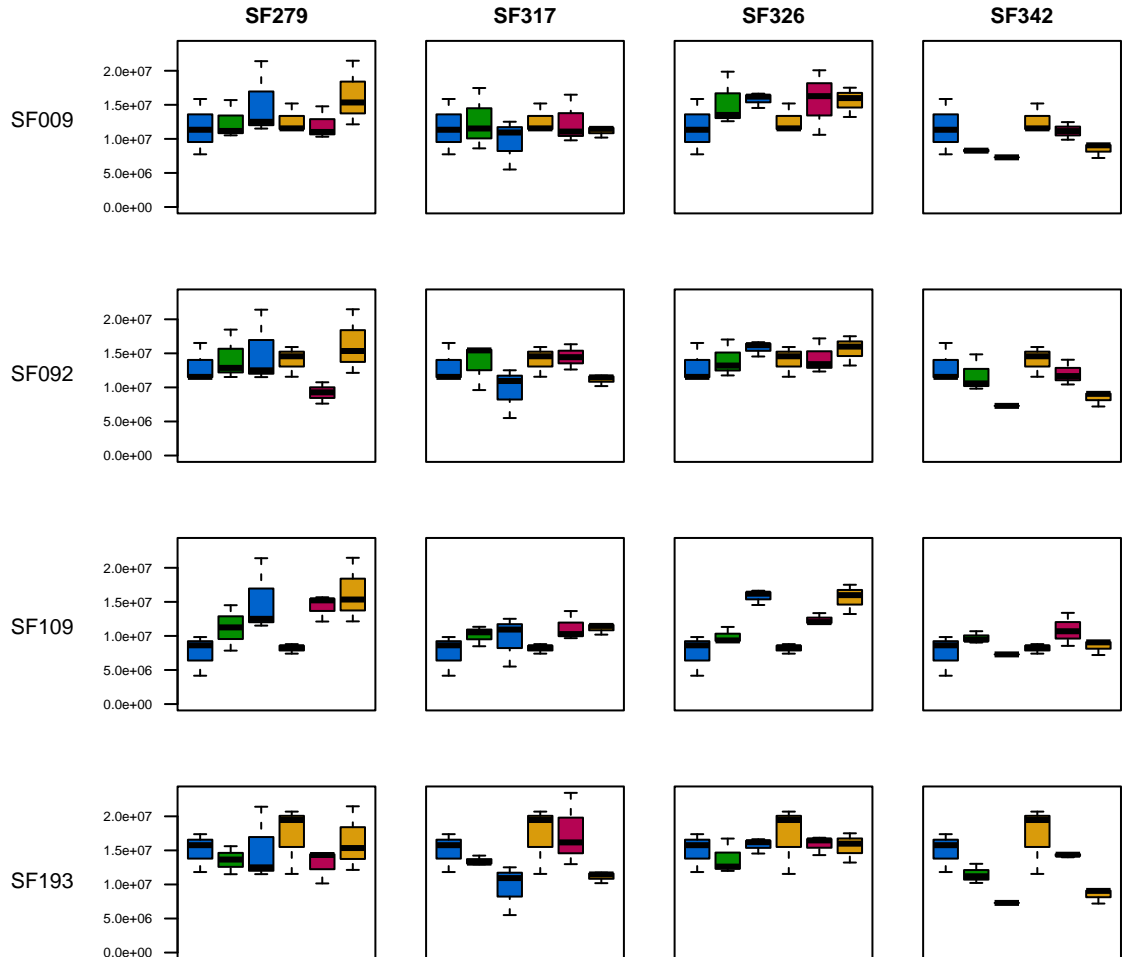

HanXRQChr12g0360111  
Probable alanine aminotransferase 2

- Parents WW
- Parents WD
- Hybrids WW
- Hybrids WD

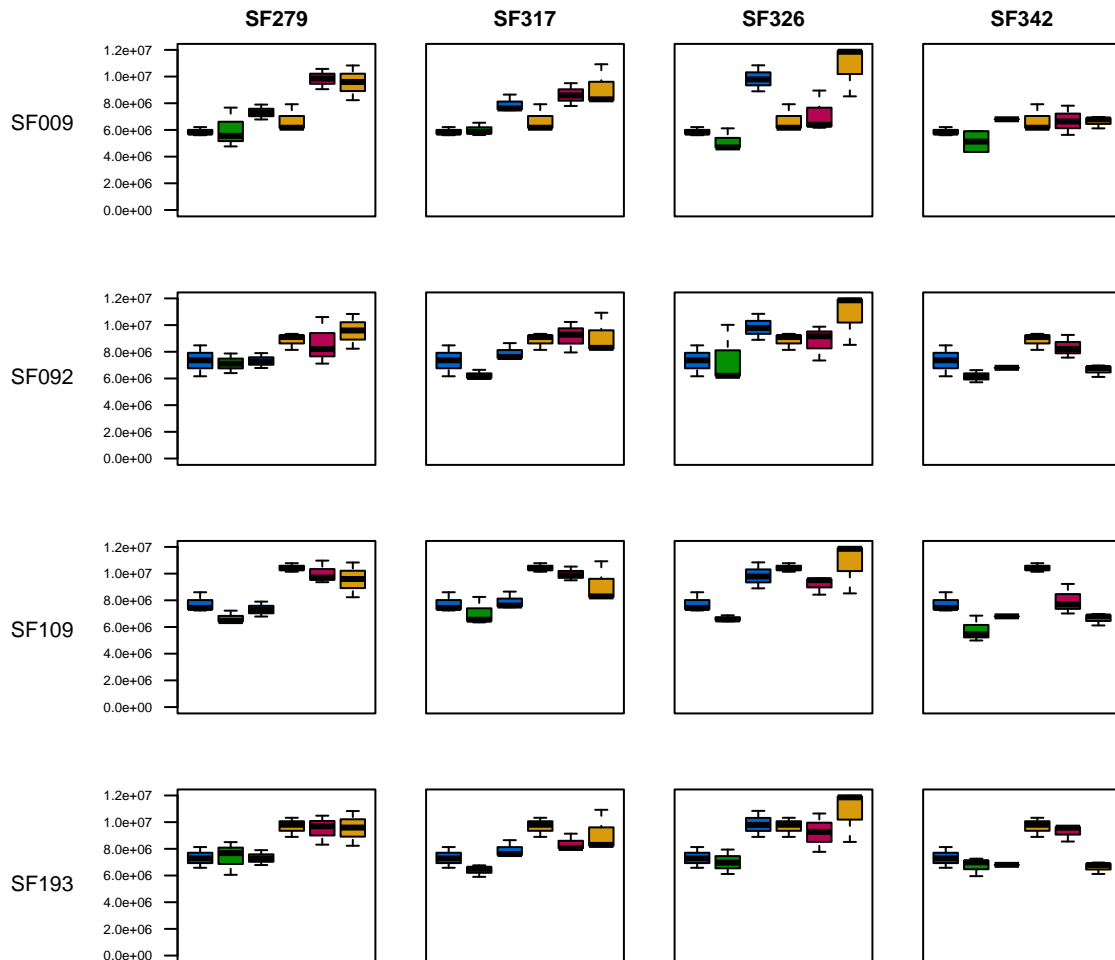

HanXRQChr09g0272241  
Putative carbonic anhydrase

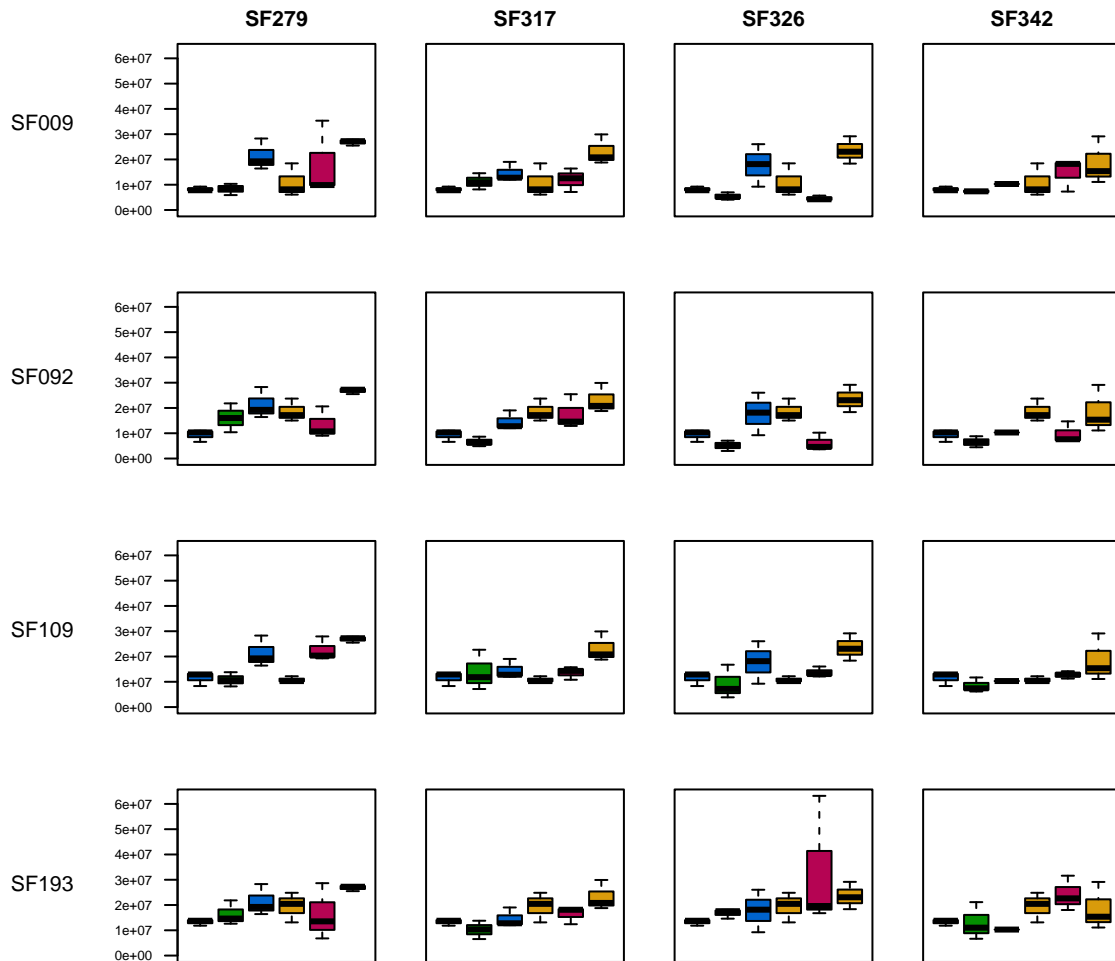

HanXRQChr01g0016151  
Putative psbP family

Parents WW  
Parents WD  
Hybrids WW  
Hybrids WD

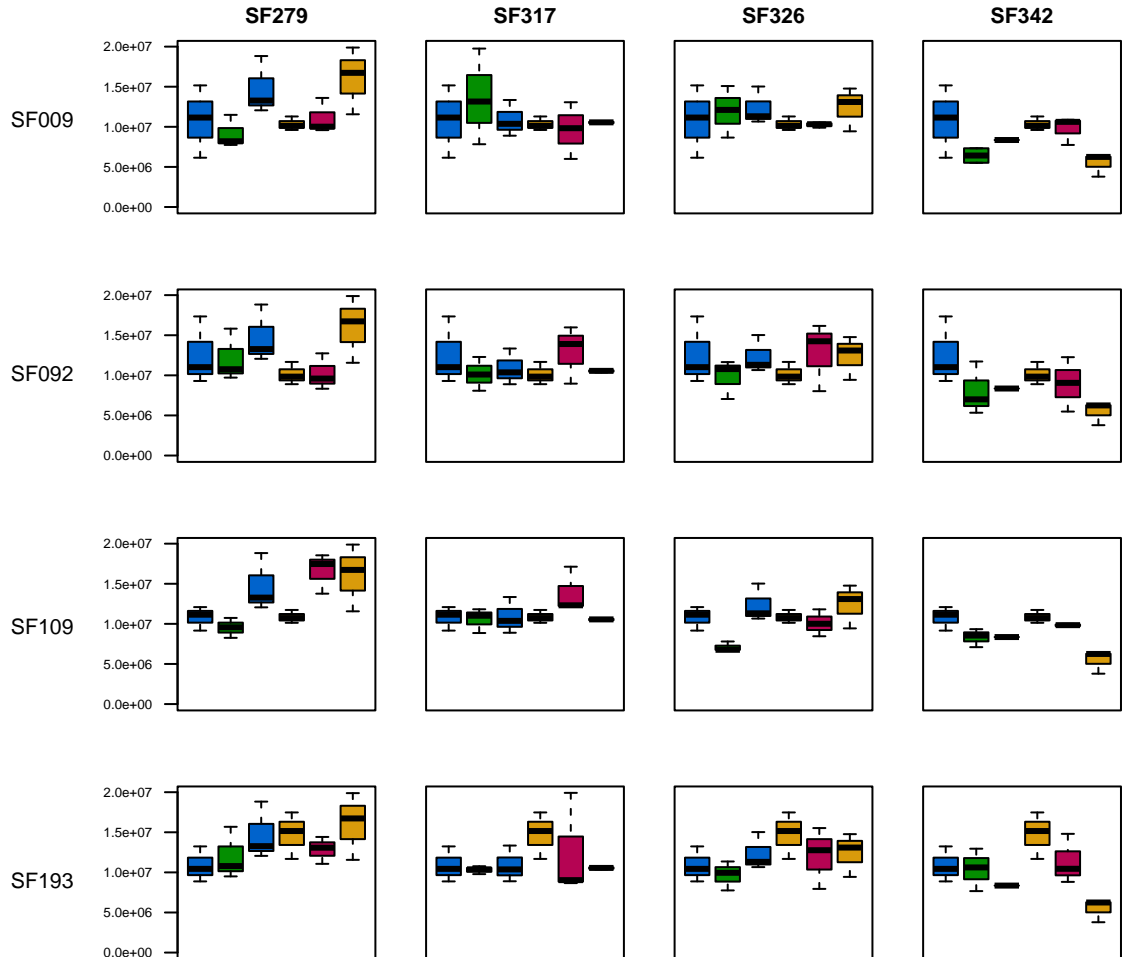

HanXRQChr01g0018371  
Probable pyridoxine biosynthesis 2

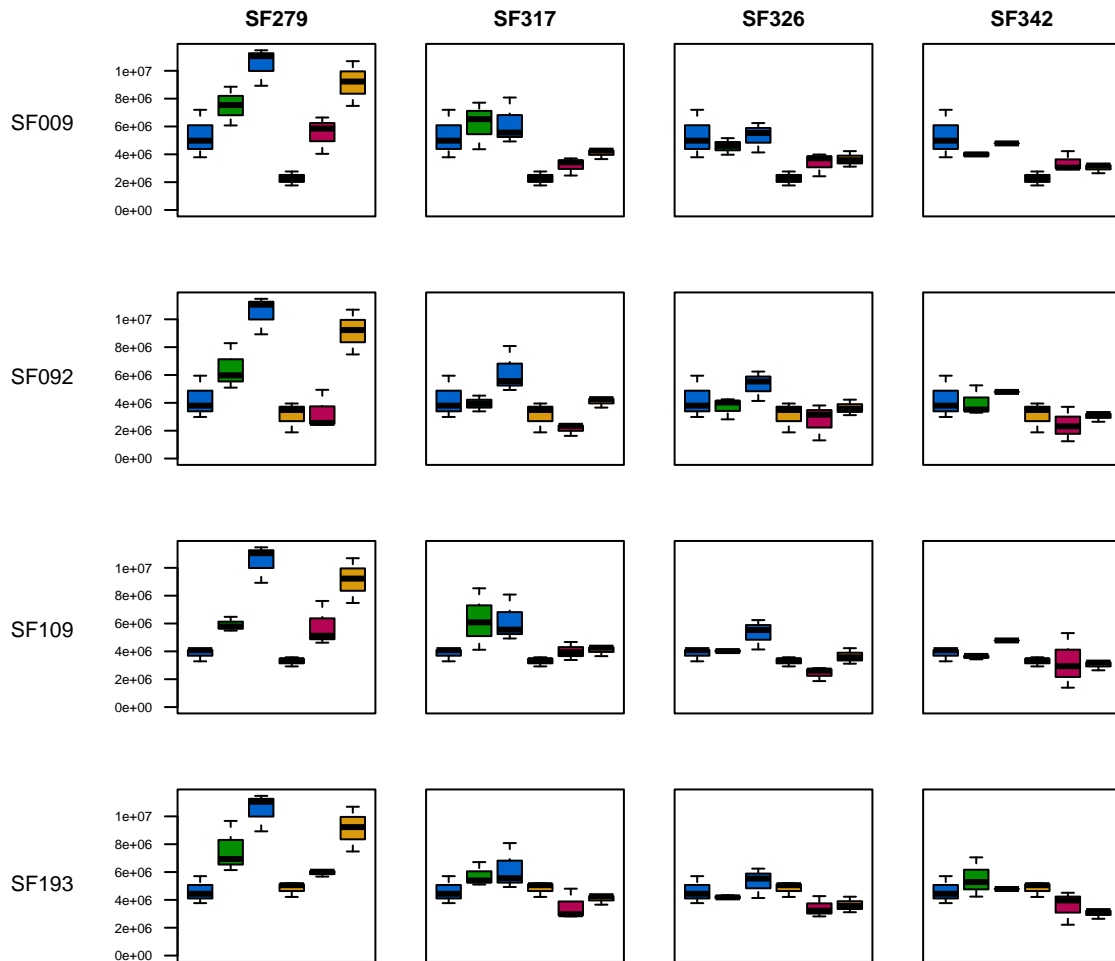

HanXRQChr09g0270821  
Probable malate dehydrogenase

Parents WW  
Parents WD  
Hybrids WW  
Hybrids WD

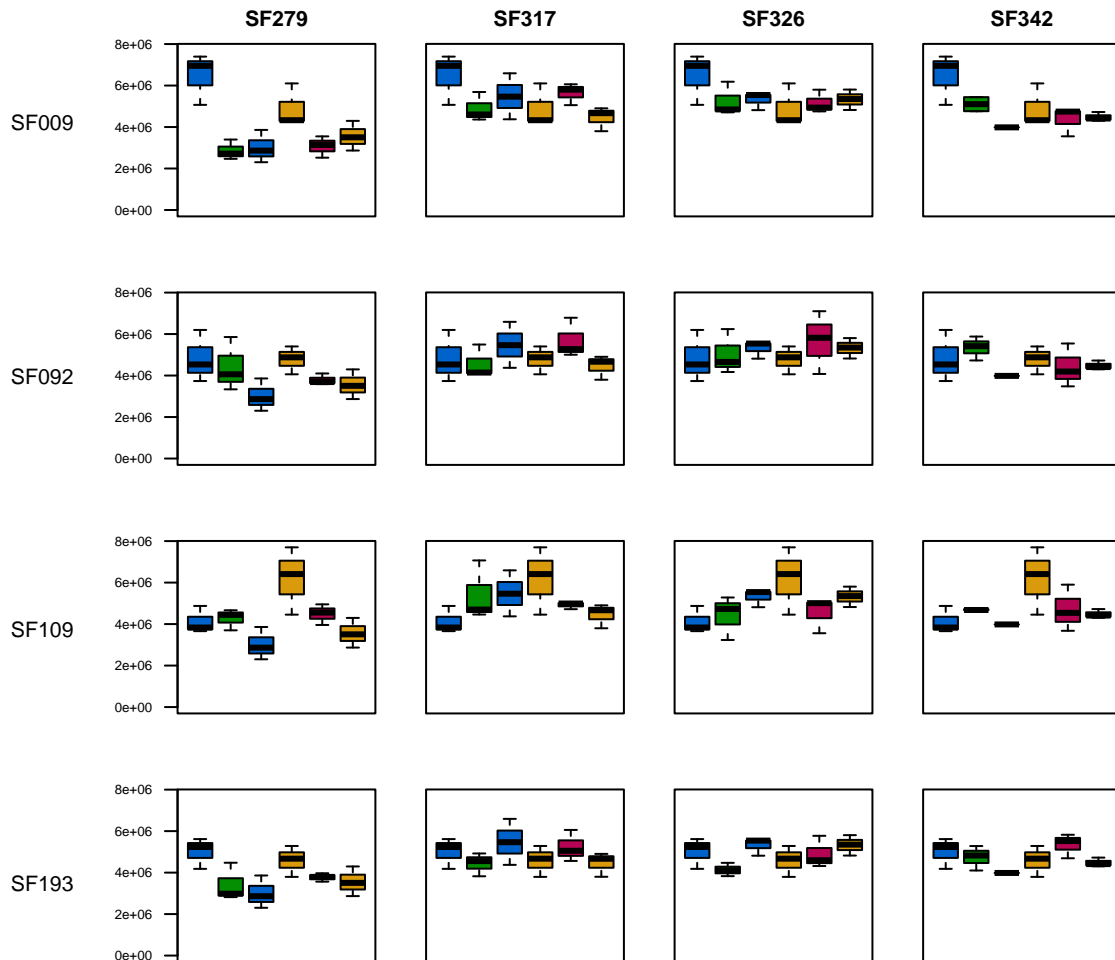



HanXRQChr01g0015941  
Putative histone H4; Histone-fold

Parents WW  
Parents WD  
Hybrids WW  
Hybrids WD

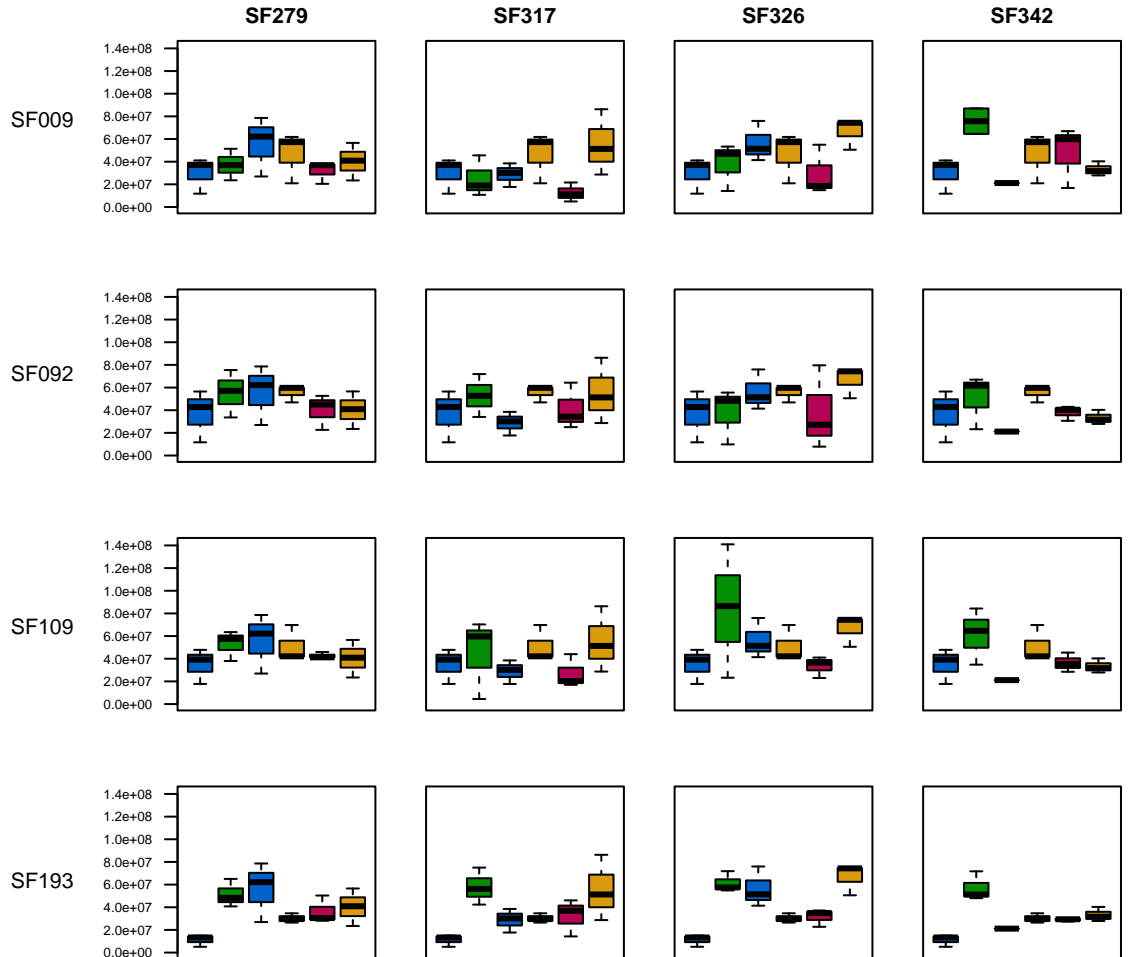

HanXRQChr09g0267621  
Putative chlorophyll A-B binding  
protein; Chlorophyll a/b binding protein dom

Parents WW  
Parents WD  
Hybrids WW  
Hybrids WD

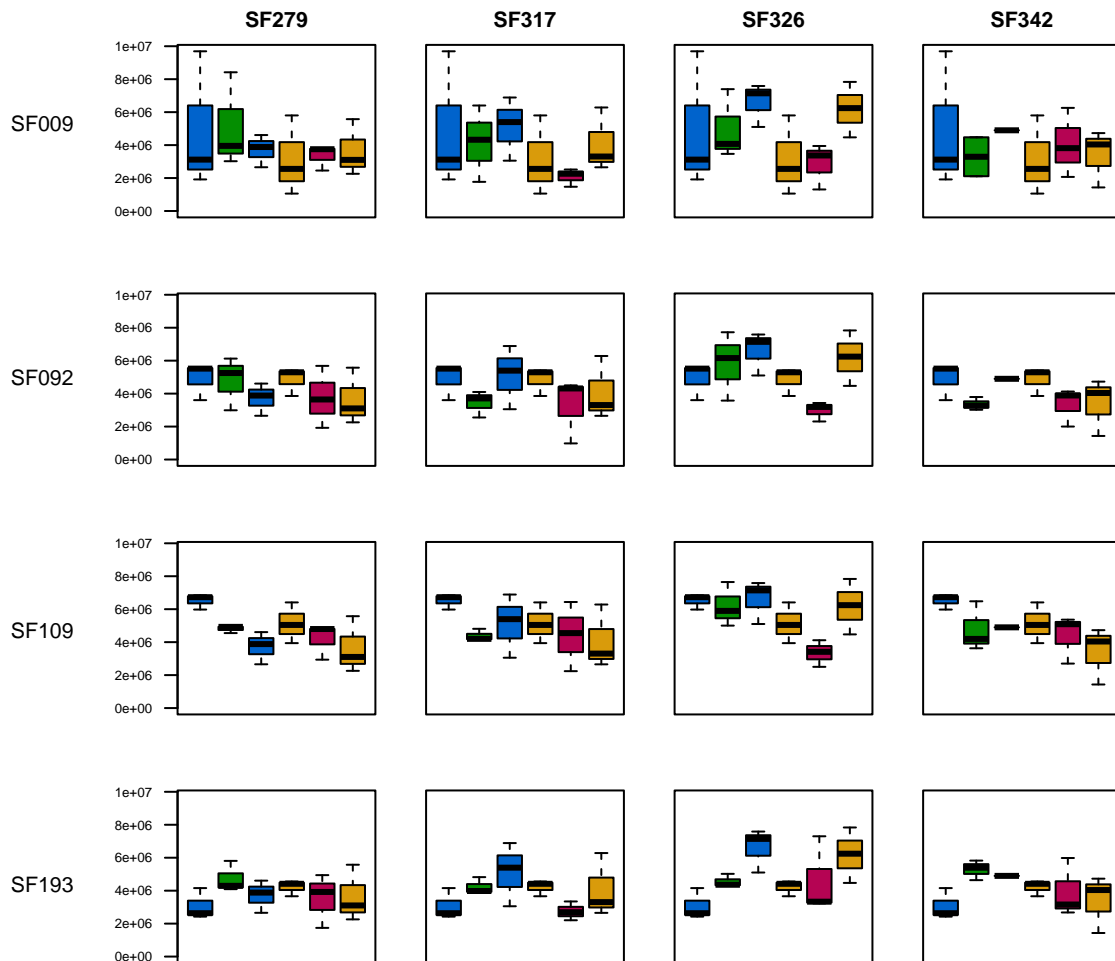

HanXRQChr05g0153451  
Probable 1-deoxy-D-xylulose 5-phosphat  
reductoisomerase, chloroplastic

Parents WW  
Parents WD  
Hybrids WW  
Hybrids WD

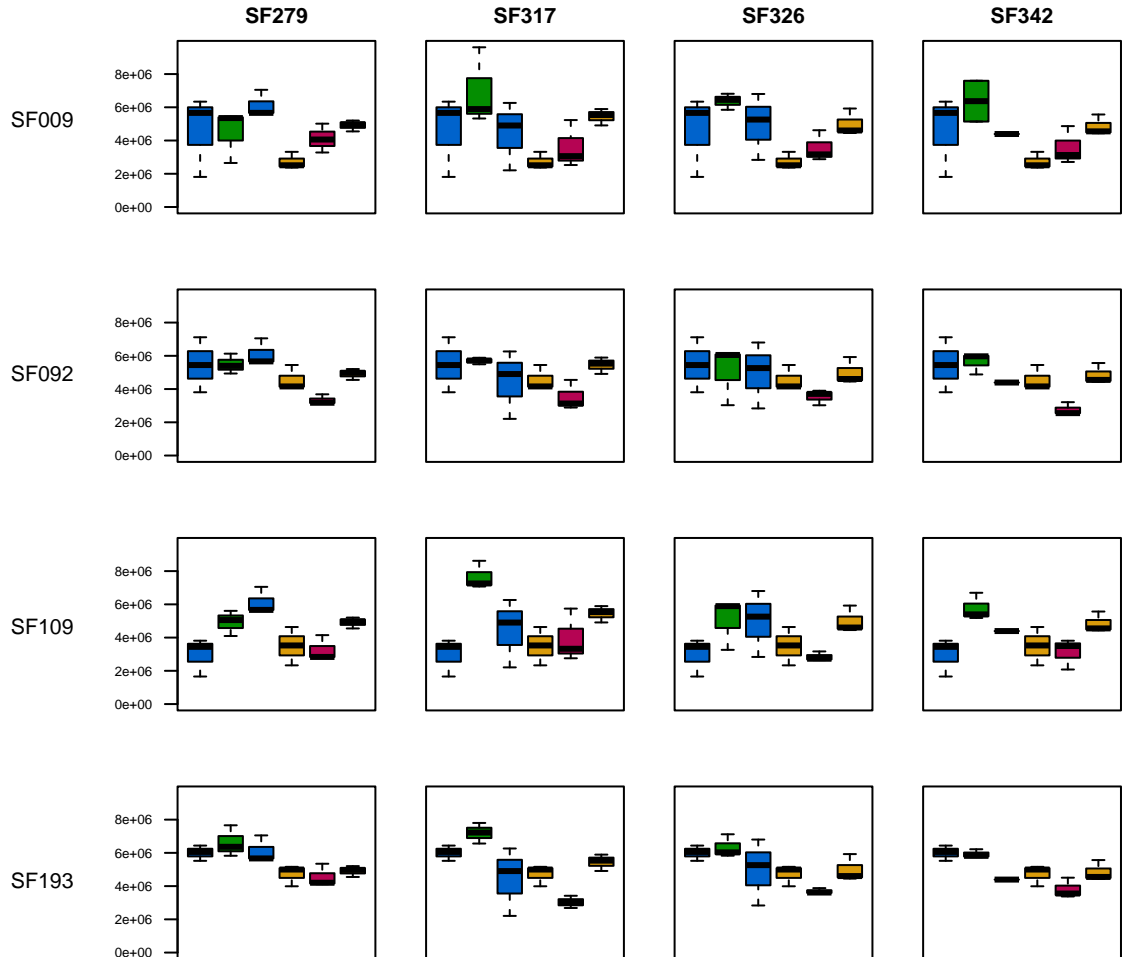

HanXRQChr16g0517081  
Probable DAG protein, chloroplastic

Parents WW  
Parents WD  
Hybrids WW  
Hybrids WD

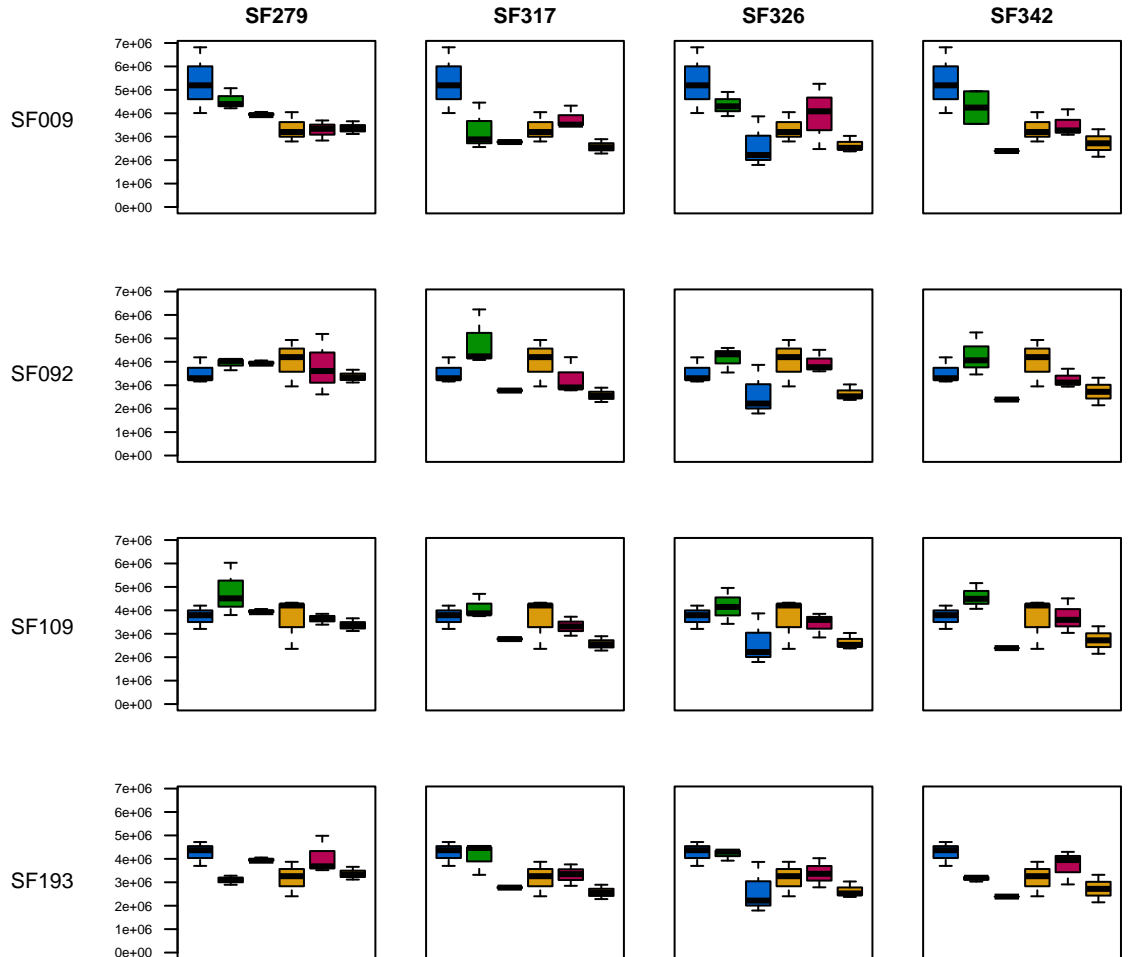

HanXRQCPg0580051  
Putative cytochrome f; Cytochrome f  
transmembrane anchor; Cytochrome f large

Parents WW  
Parents WD  
Hybrids WW  
Hybrids WD

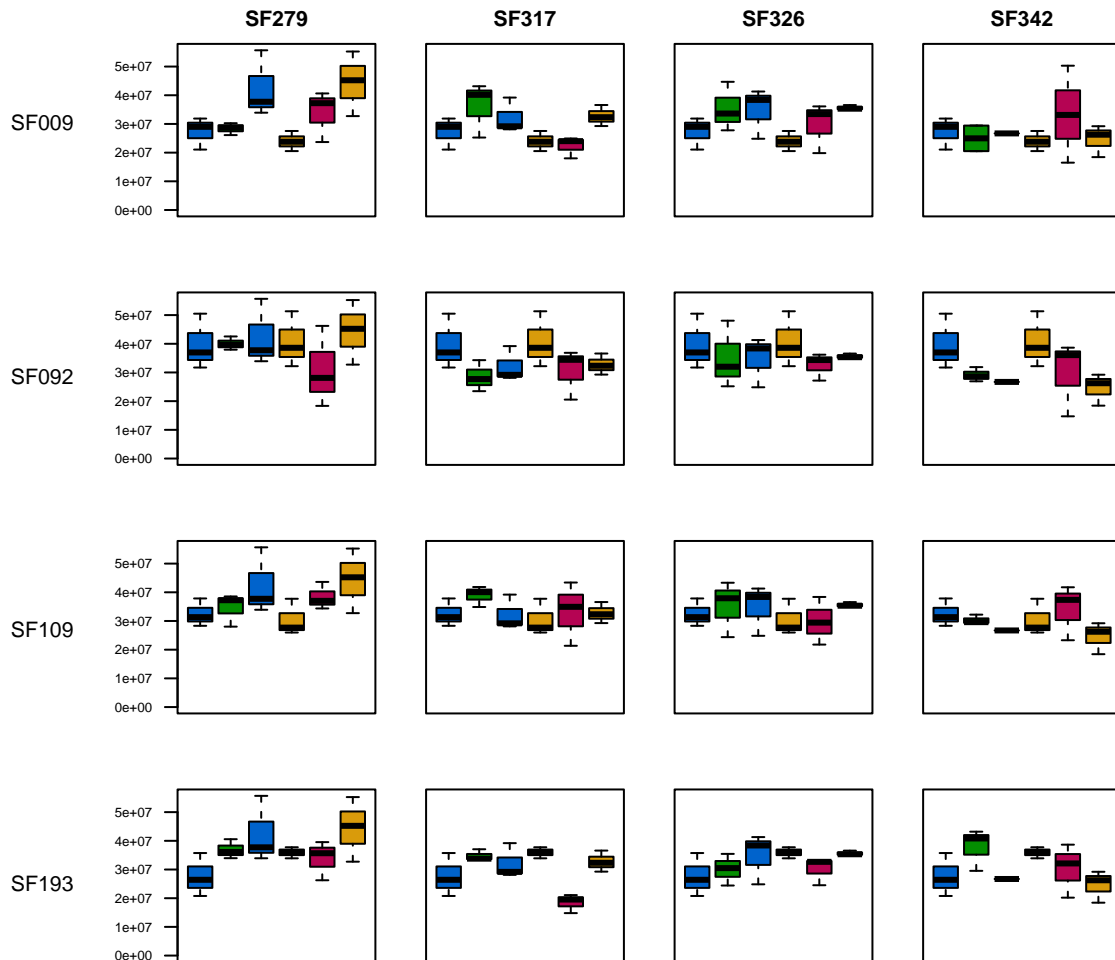

HanXRQChr17g0538891  
Putative glu-tRNA<sup>Gln</sup> amidotransferase C  
subunit

Parents WW  
Parents WD  
Hybrids WW  
Hybrids WD

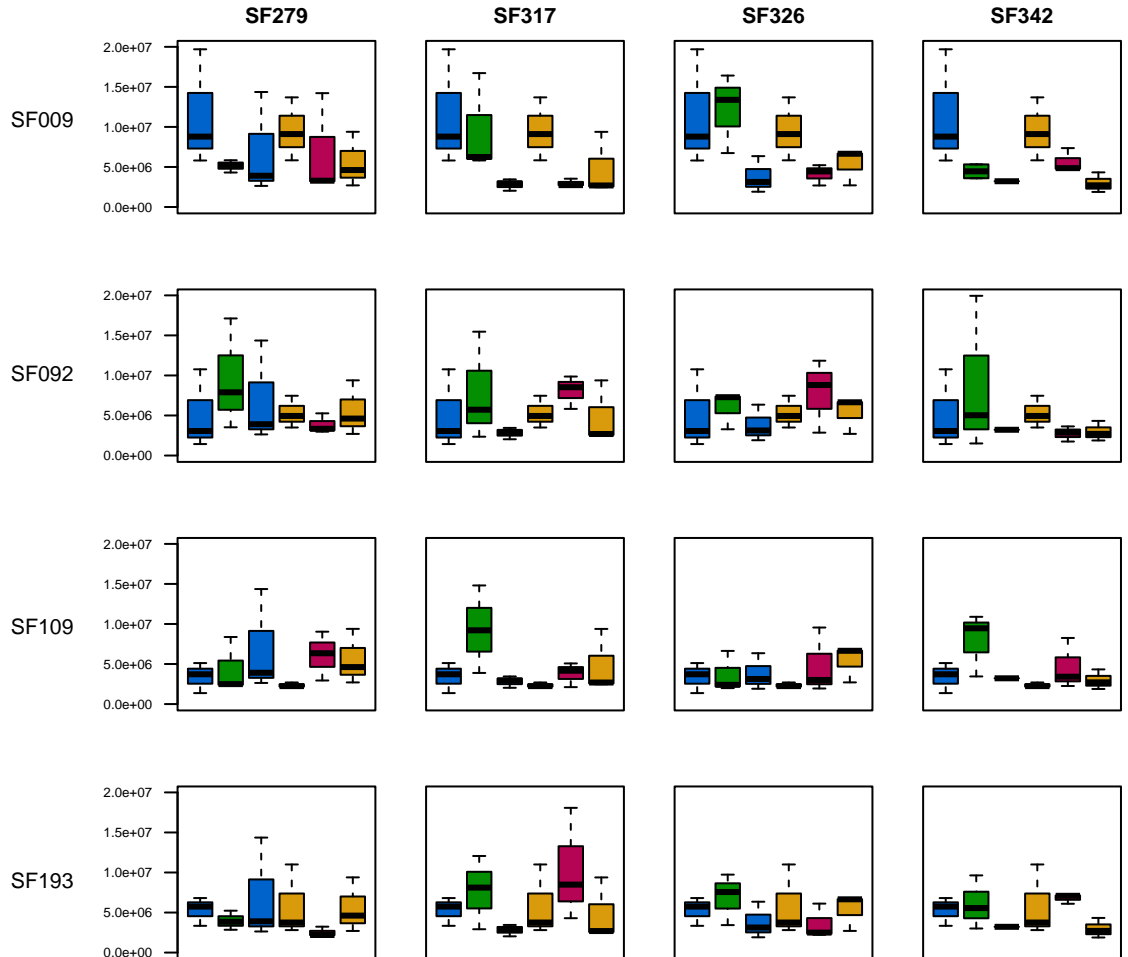

HanXRQChr08g0236031  
Putative niFe hydrogenase-like

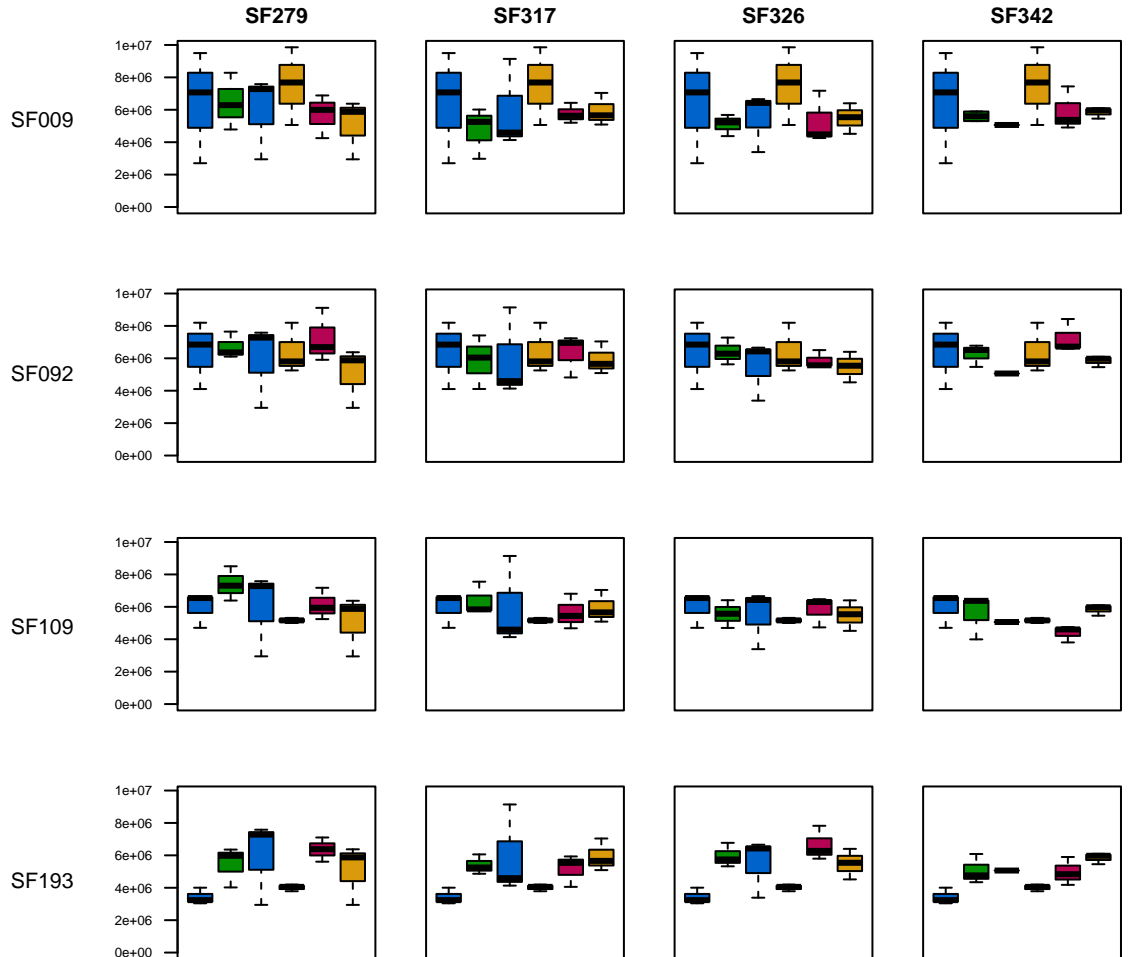

HanXRQChr05g0142311  
 Probable regulatory particle triple-A  
 ATPase 6A

Parents WW  
 Parents WD  
 Hybrids WW  
 Hybrids WD

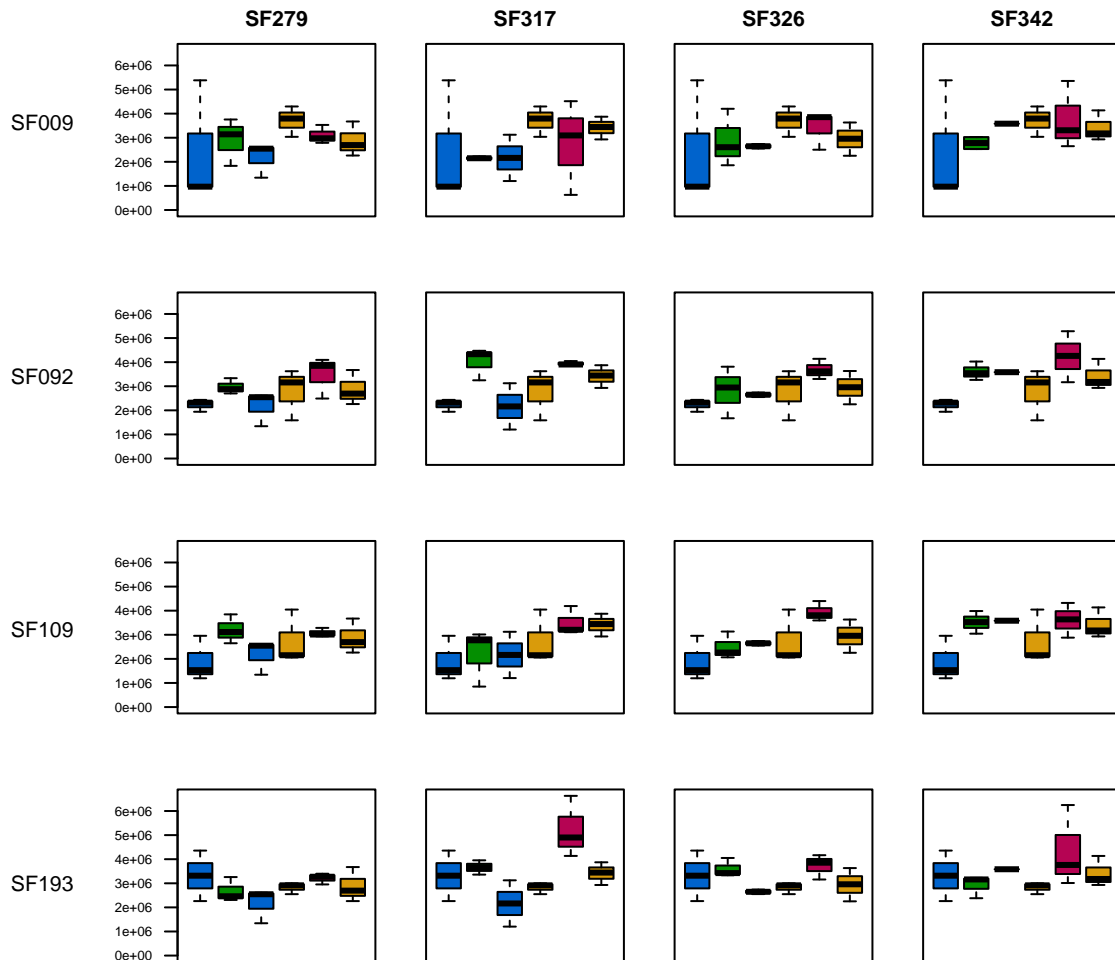



HanXRQChr07g0190171  
Probable isocitrate dehydrogenase [NADP]

- Parents WW
- Parents WD
- Hybrids WW
- Hybrids WD

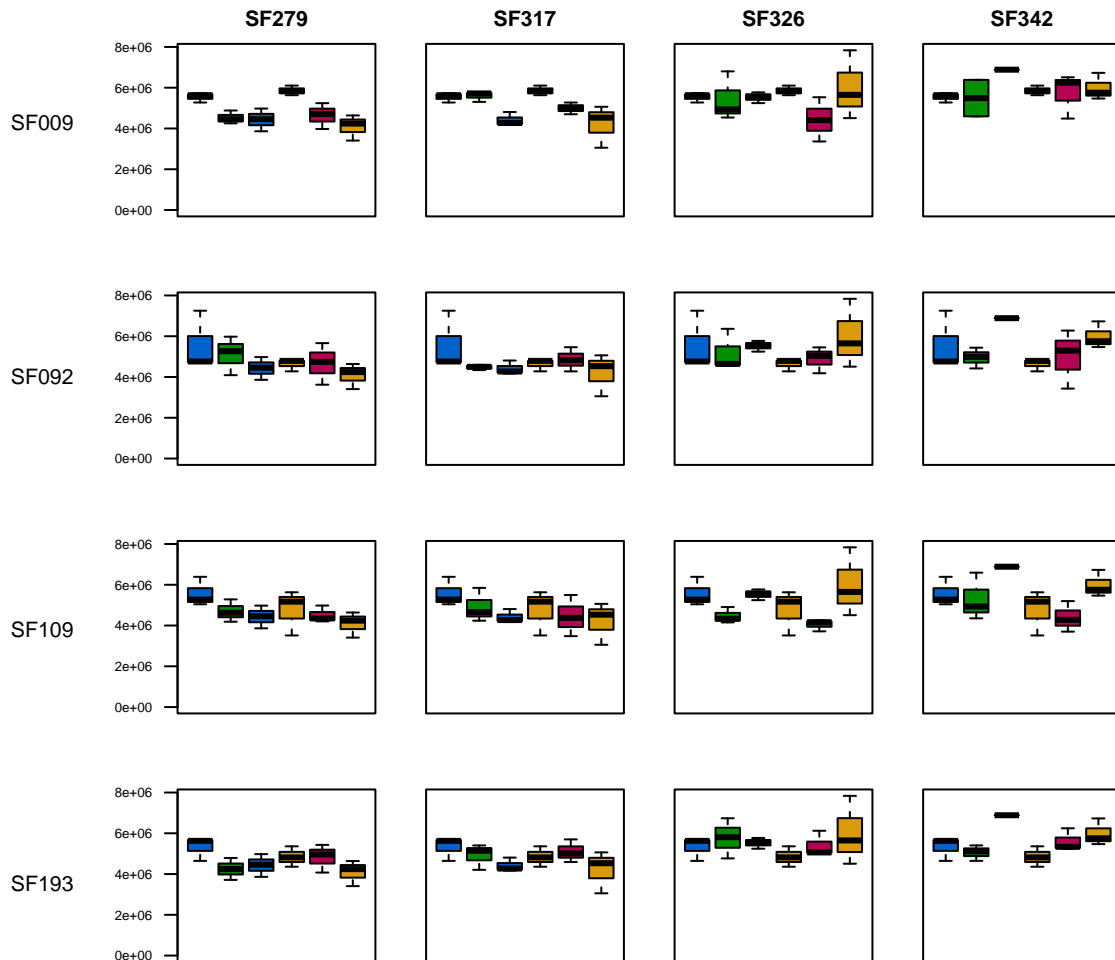

HanXRQChr17g0553691  
Probable glycyl-tRNA synthetase /  
glycine--tRNA ligase

Parents WW  
Parents WD  
Hybrids WW  
Hybrids WD

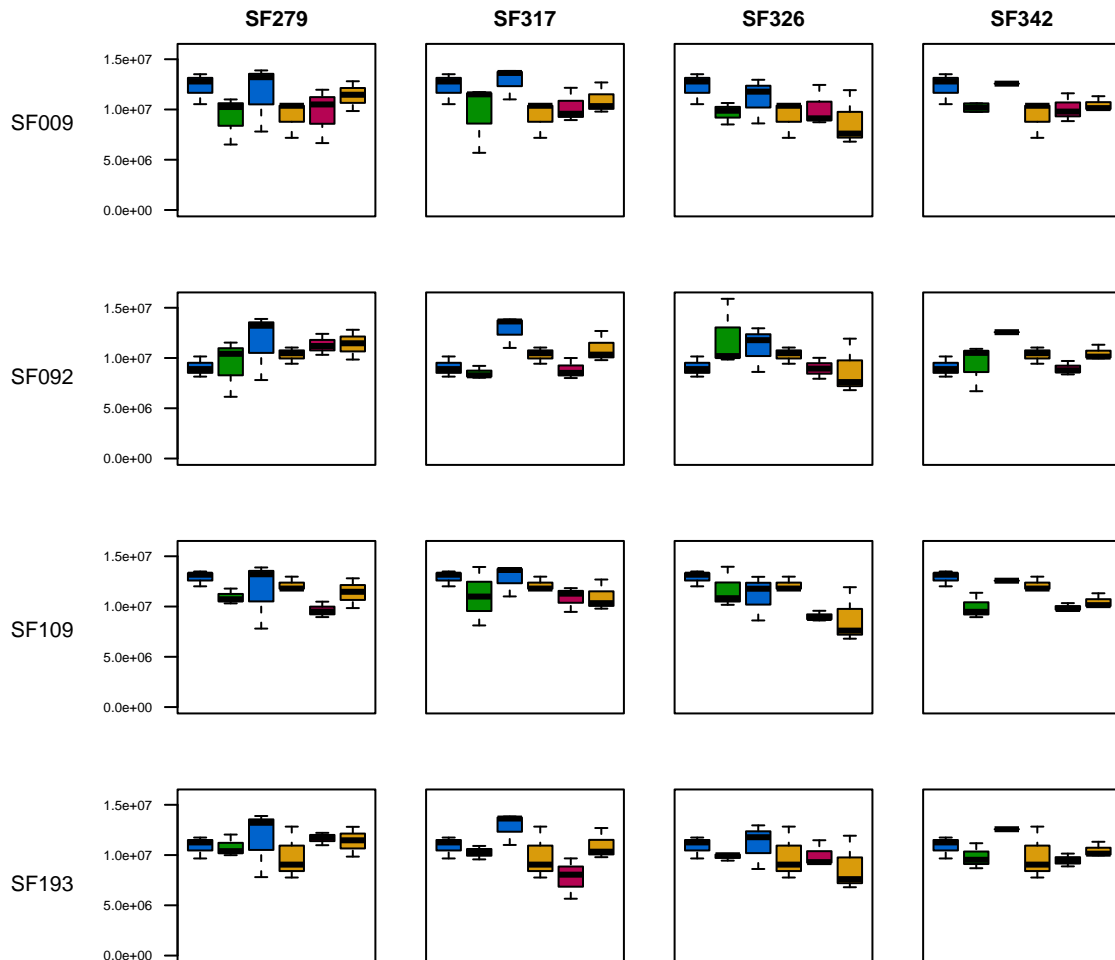

HanXRQChr04g0127301  
Putative protein of unknown function  
DUF538

Parents WW  
Parents WD  
Hybrids WW  
Hybrids WD

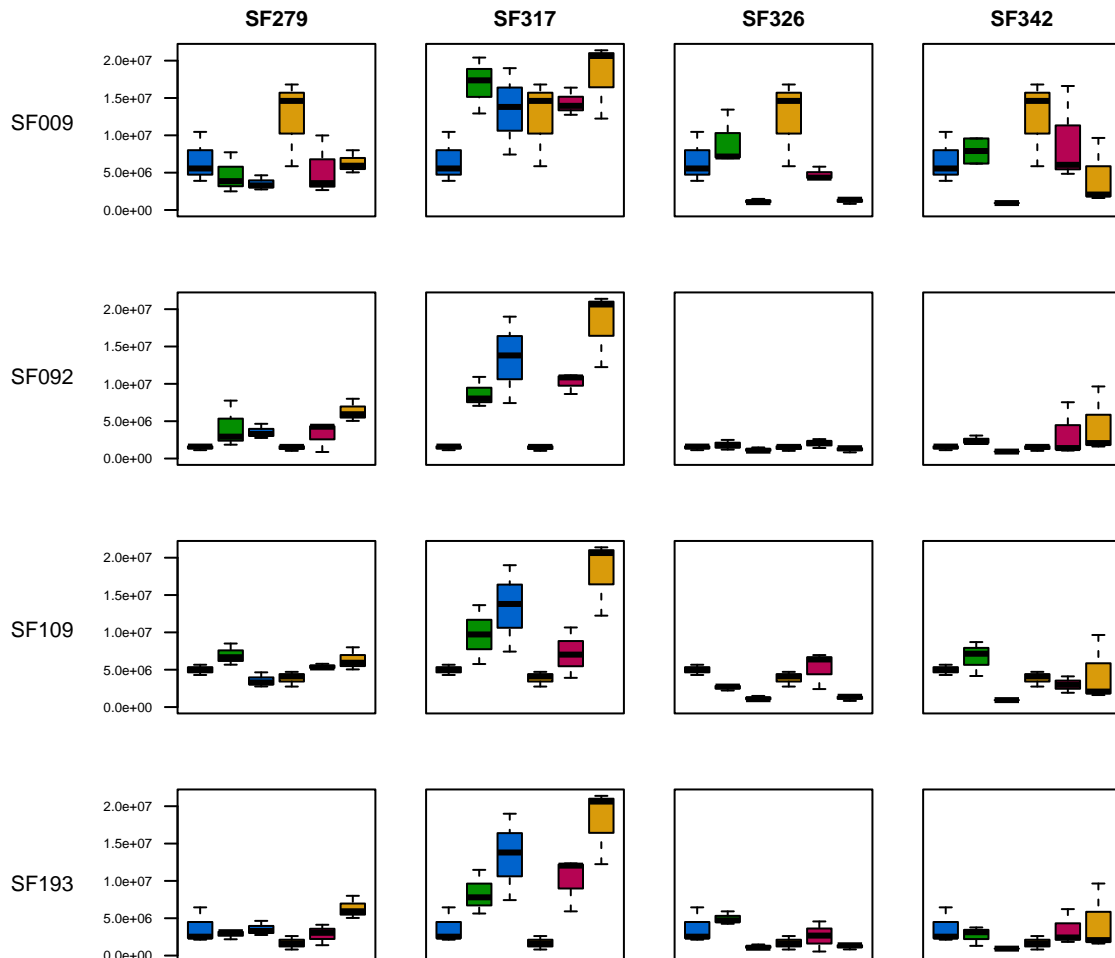

HanXRQChr17g0540971  
Putative succinyl-CoA ligase, alpha  
subunit; ATP-citrate synthase; NAD(P)-bin

Parents WW  
Parents WD  
Hybrids WW  
Hybrids WD

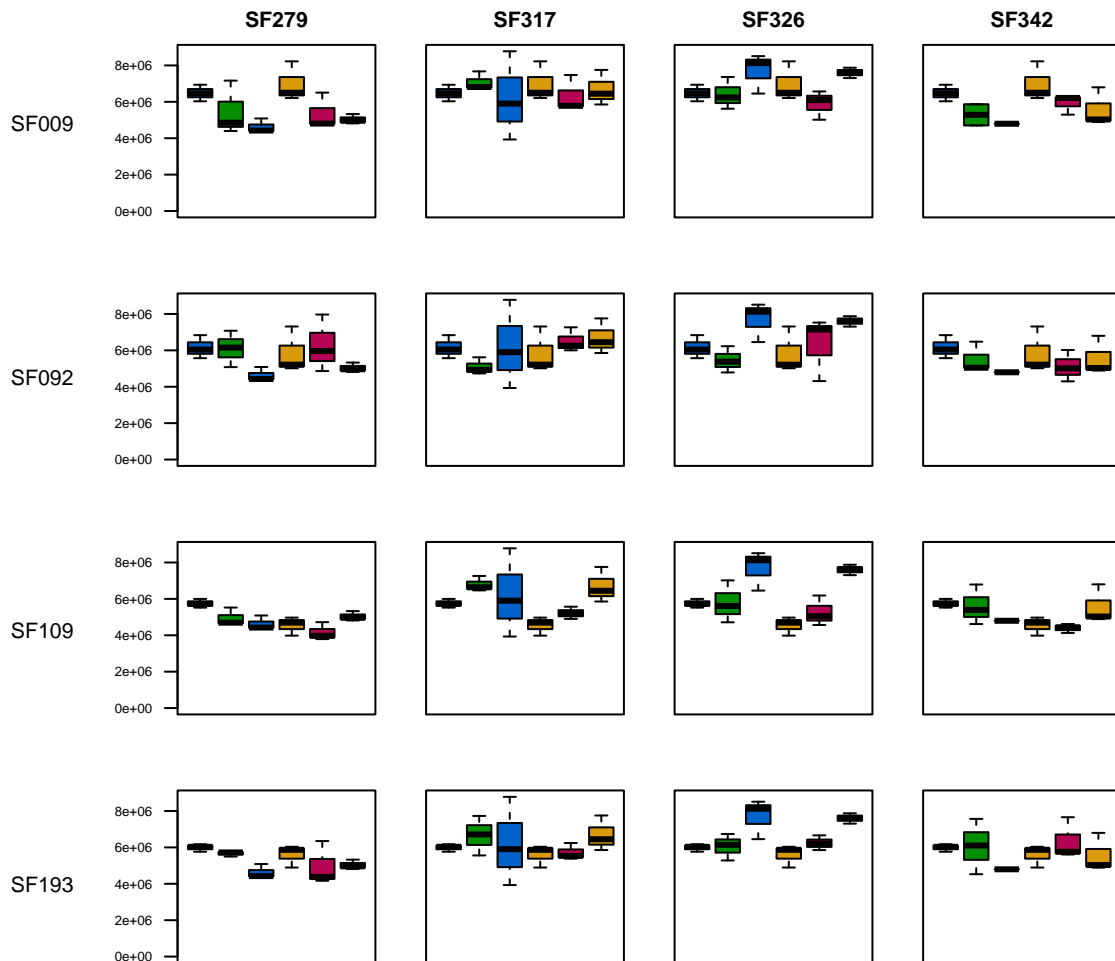

HanXRQChr12g0375551  
Probable oligopeptidase A

Parents WW  
Parents WD  
Hybrids WW  
Hybrids WD

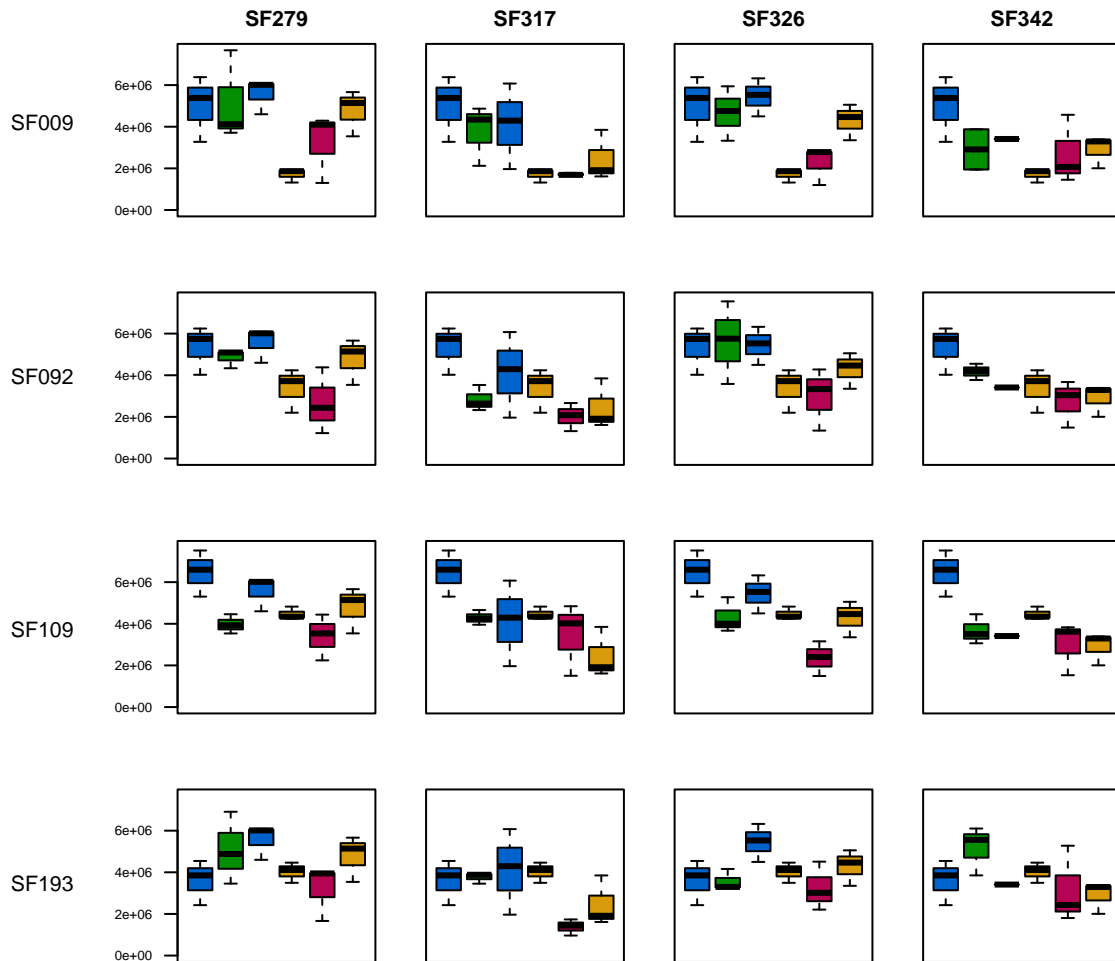

HanXRQChr10g0289501  
 Probable cyclophilin-like  
 peptidyl-prolyl cis-trans isomerase family p

Parents WW  
 Parents WD  
 Hybrids WW  
 Hybrids WD

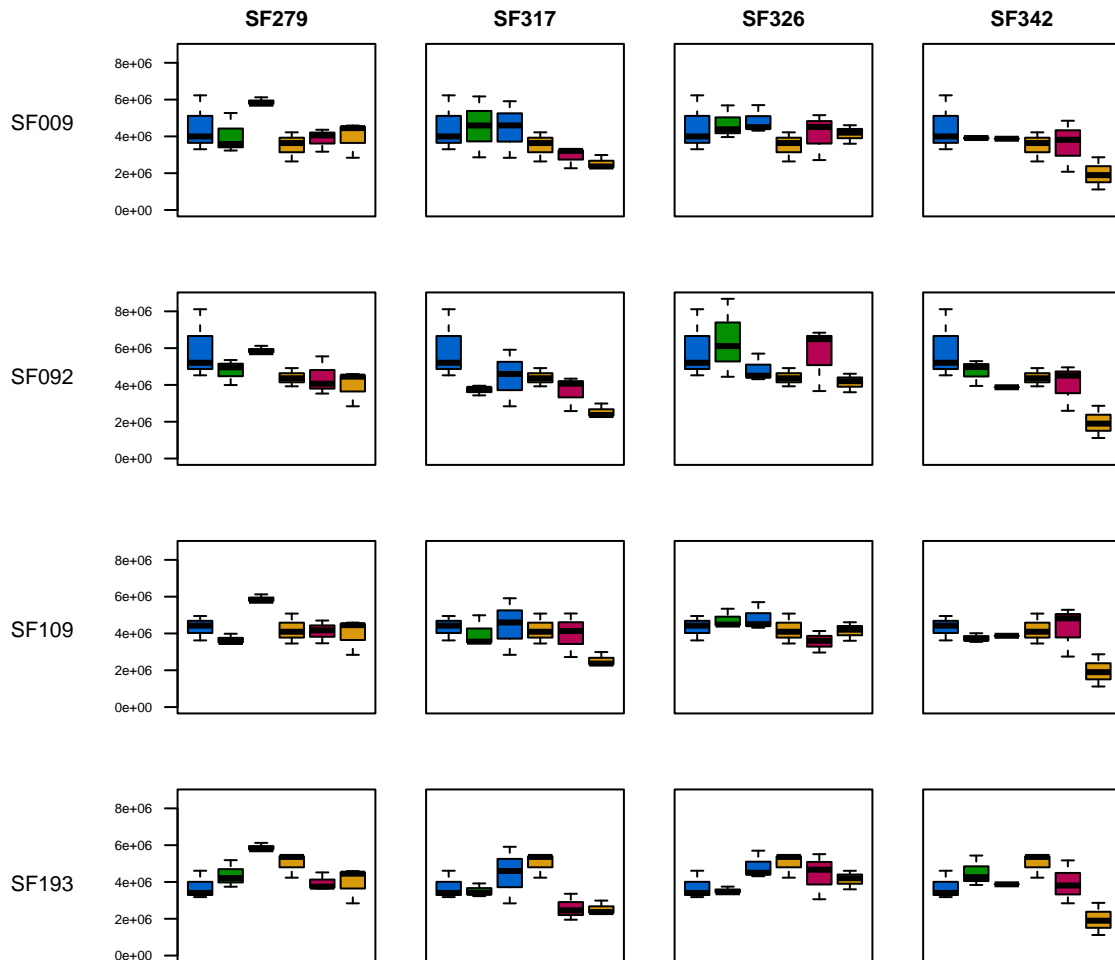

HanXRQChr06g0171591  
 Probable oxygen-evolving enhancer  
 protein 2, chloroplastic

Parents WW  
 Parents WD  
 Hybrids WW  
 Hybrids WD

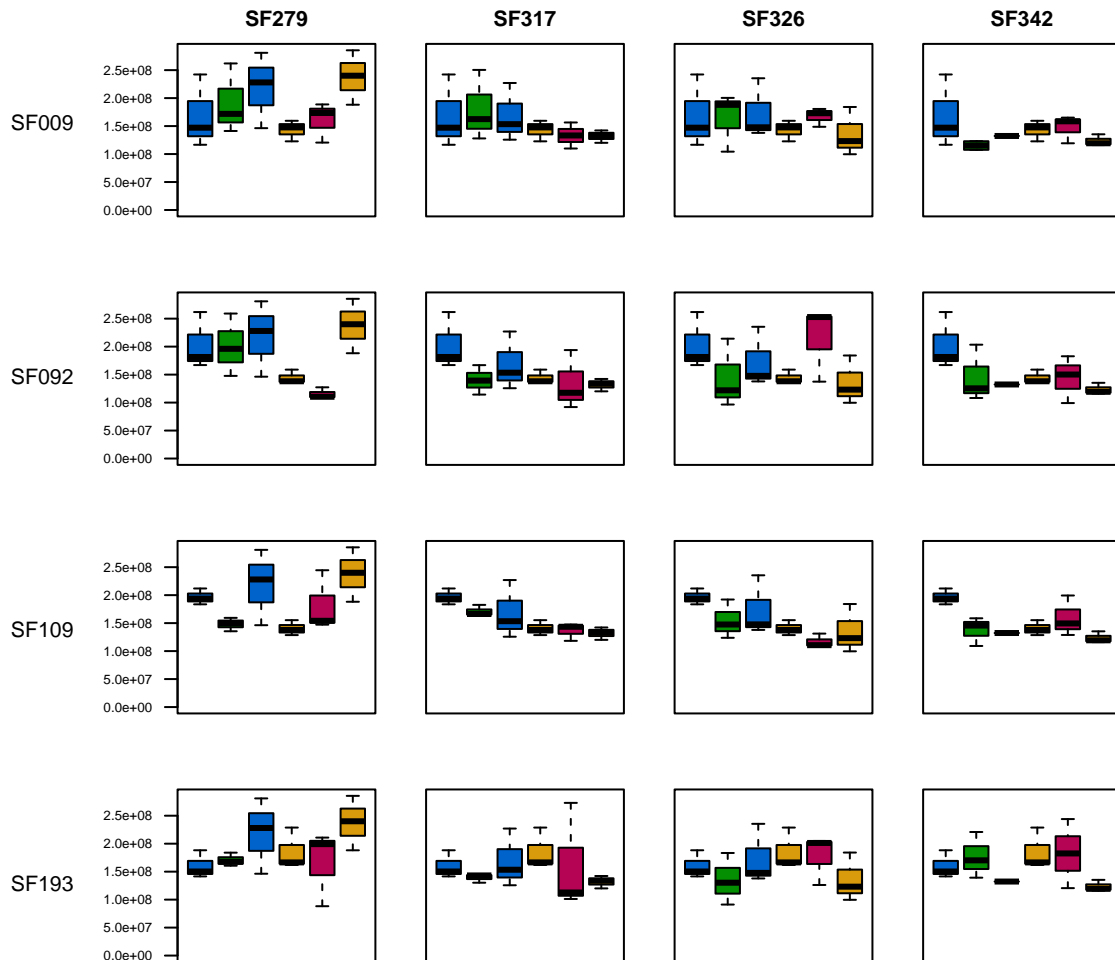

HanXRQChr04g0096851  
Probable phospholipase D alpha 1

Parents WW  
Parents WD  
Hybrids WW  
Hybrids WD

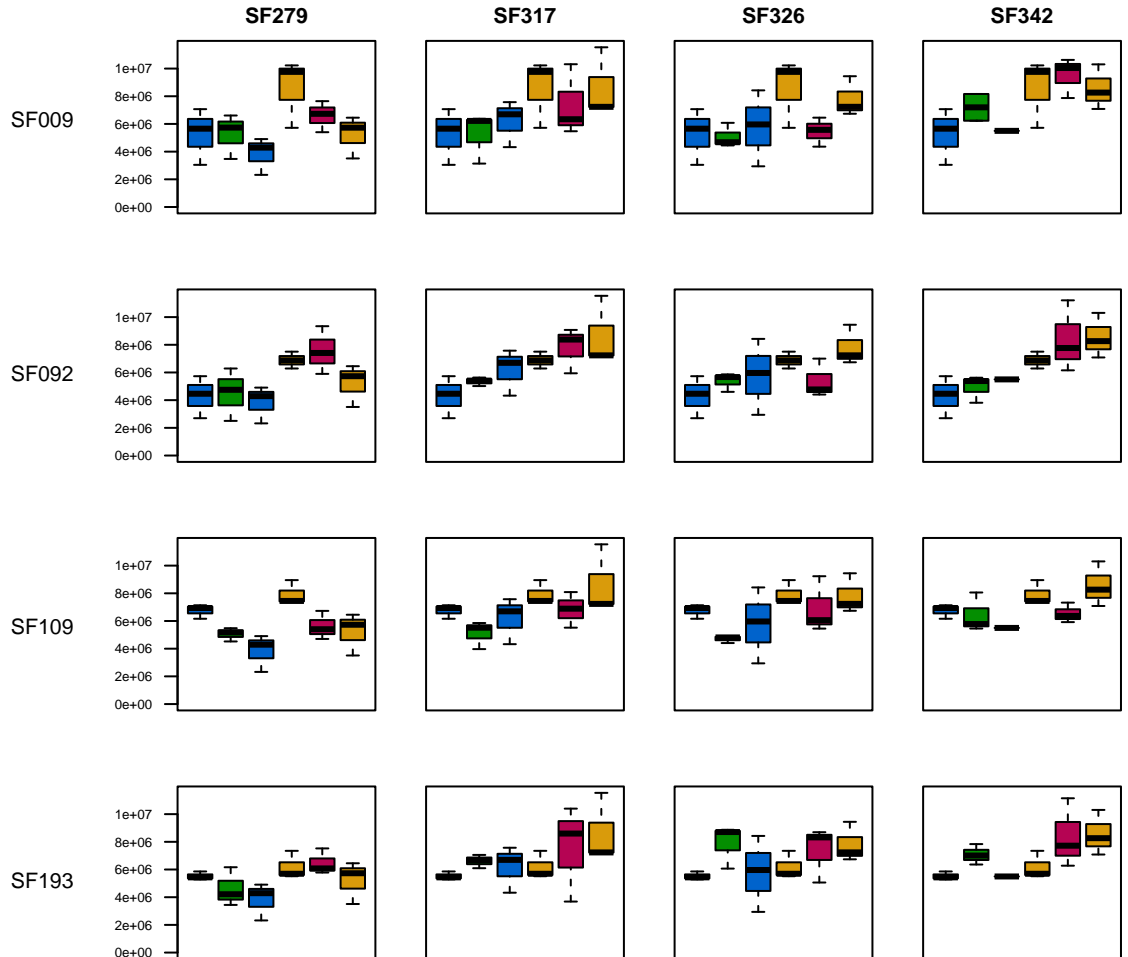



HanXRQChr03g0088791  
Probable aconitase/3-isopropylmalate  
dehydratase protein

Parents WW  
Parents WD  
Hybrids WW  
Hybrids WD

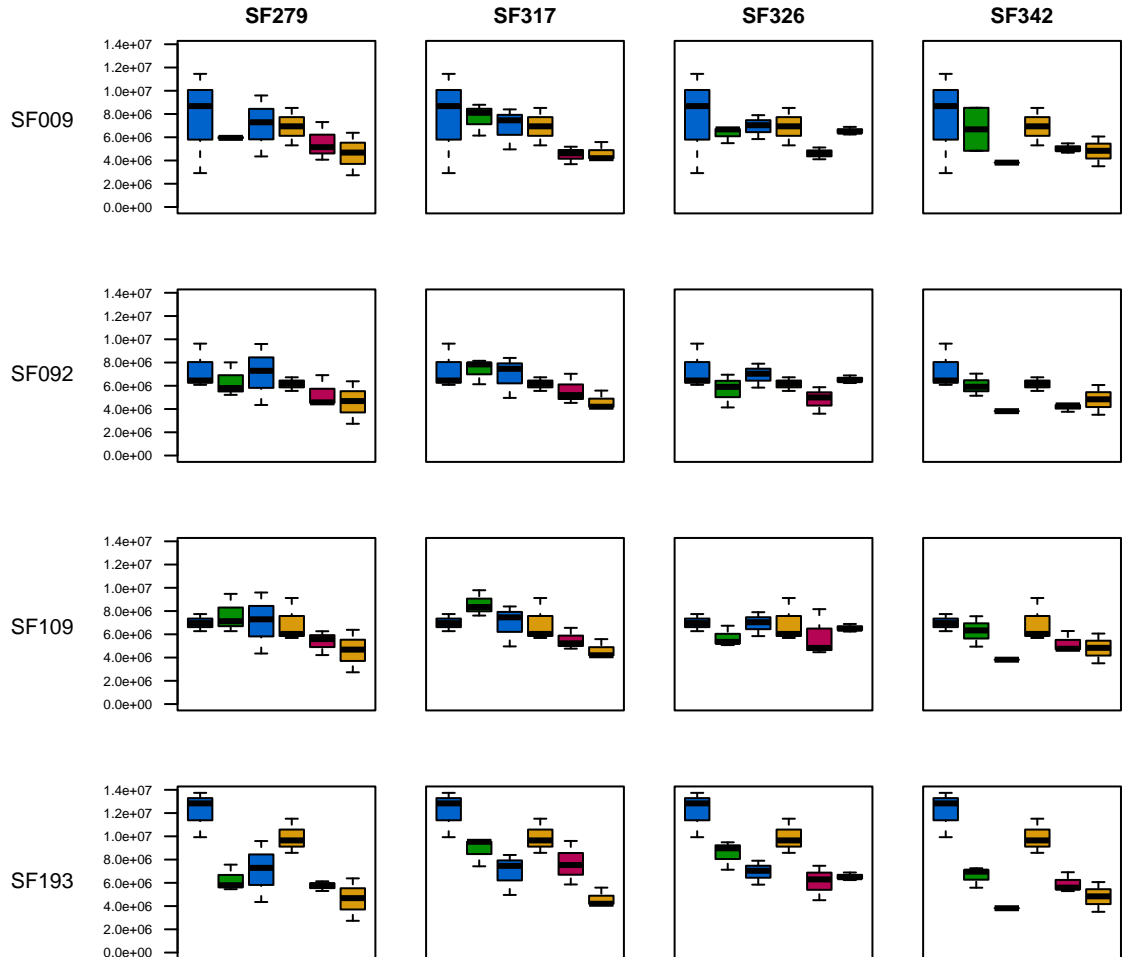

HanXRQChr17g0566841  
Probable phosphoglucomutase, cytoplasmic

Parents WW  
Parents WD  
Hybrids WW  
Hybrids WD

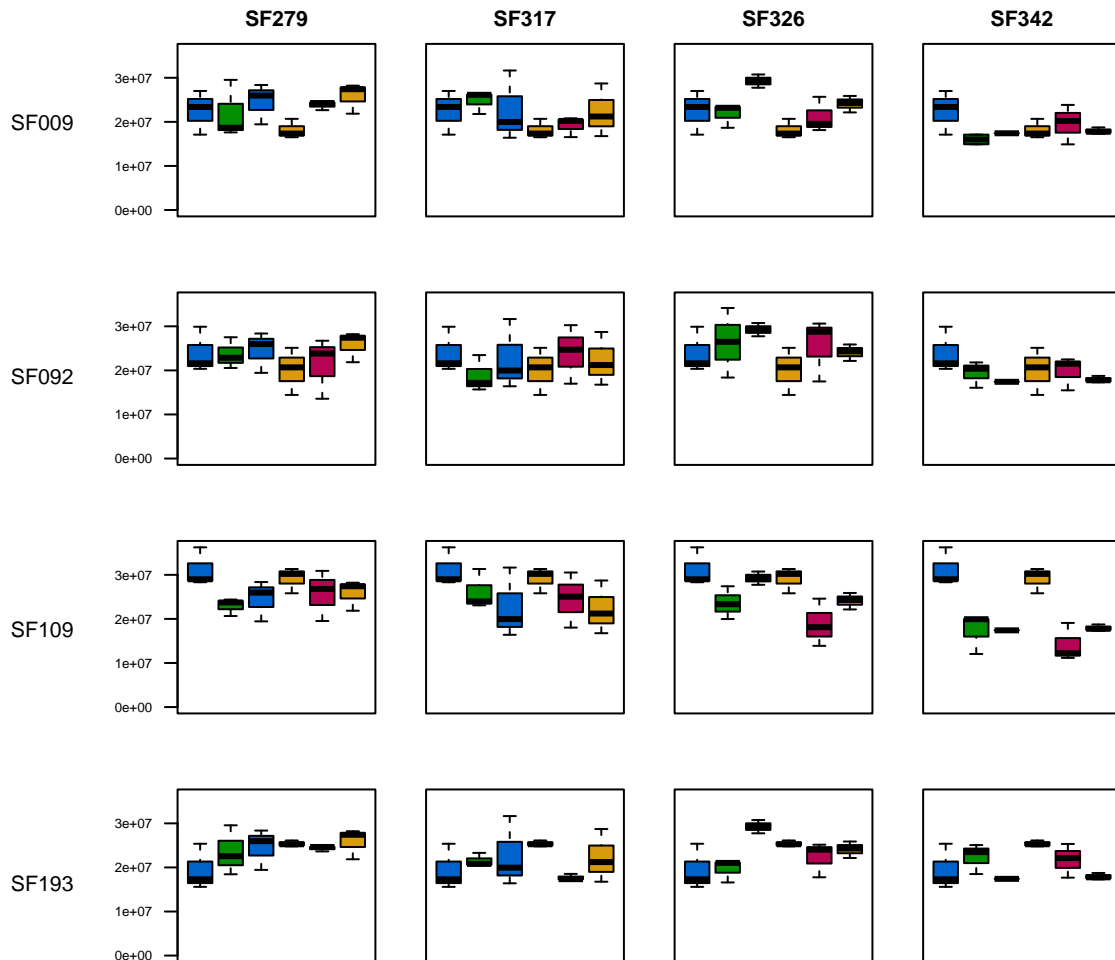

HanXRQChr12g0379541  
Uncharacterized protein, supported by  
expression data

Parents WW  
Parents WD  
Hybrids WW  
Hybrids WD

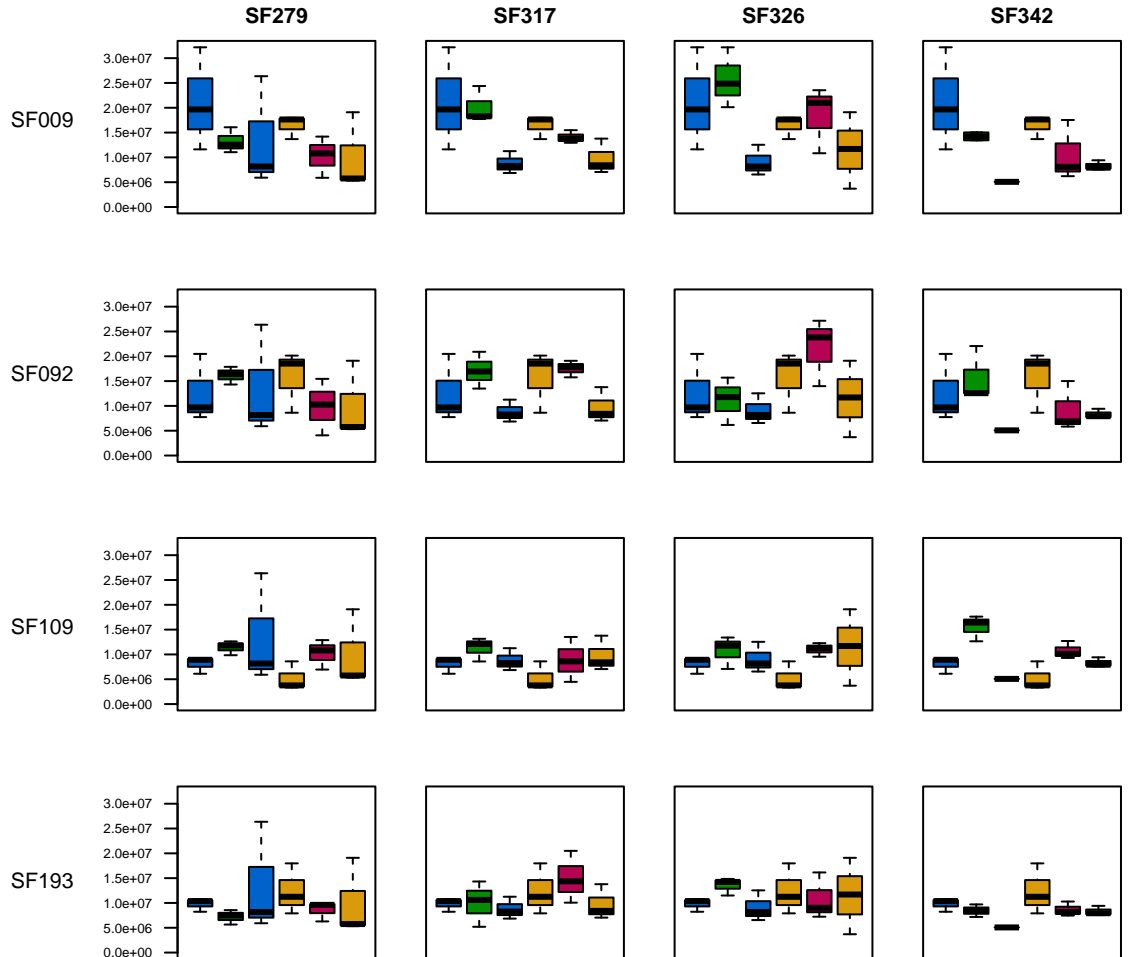

HanXRQChr04g0111521  
Probable nascent polypeptide-associated  
complex (NAC), alpha subunit family protein

Parents WW  
Parents WD  
Hybrids WW  
Hybrids WD

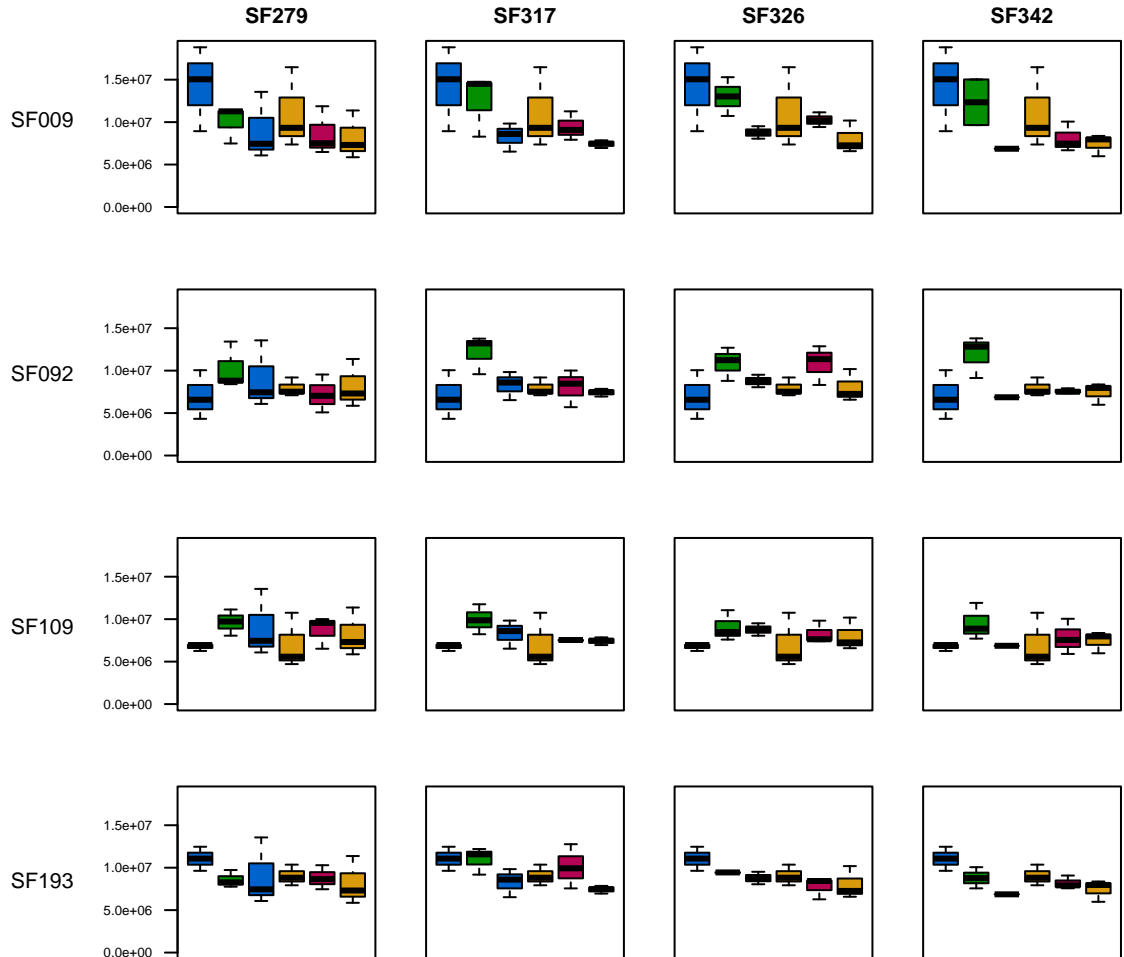

HanXRQChr14g0453731  
 Probable magnesium-chelatase subunit  
 ChlD, chloroplastic

Parents WW  
 Parents WD  
 Hybrids WW  
 Hybrids WD

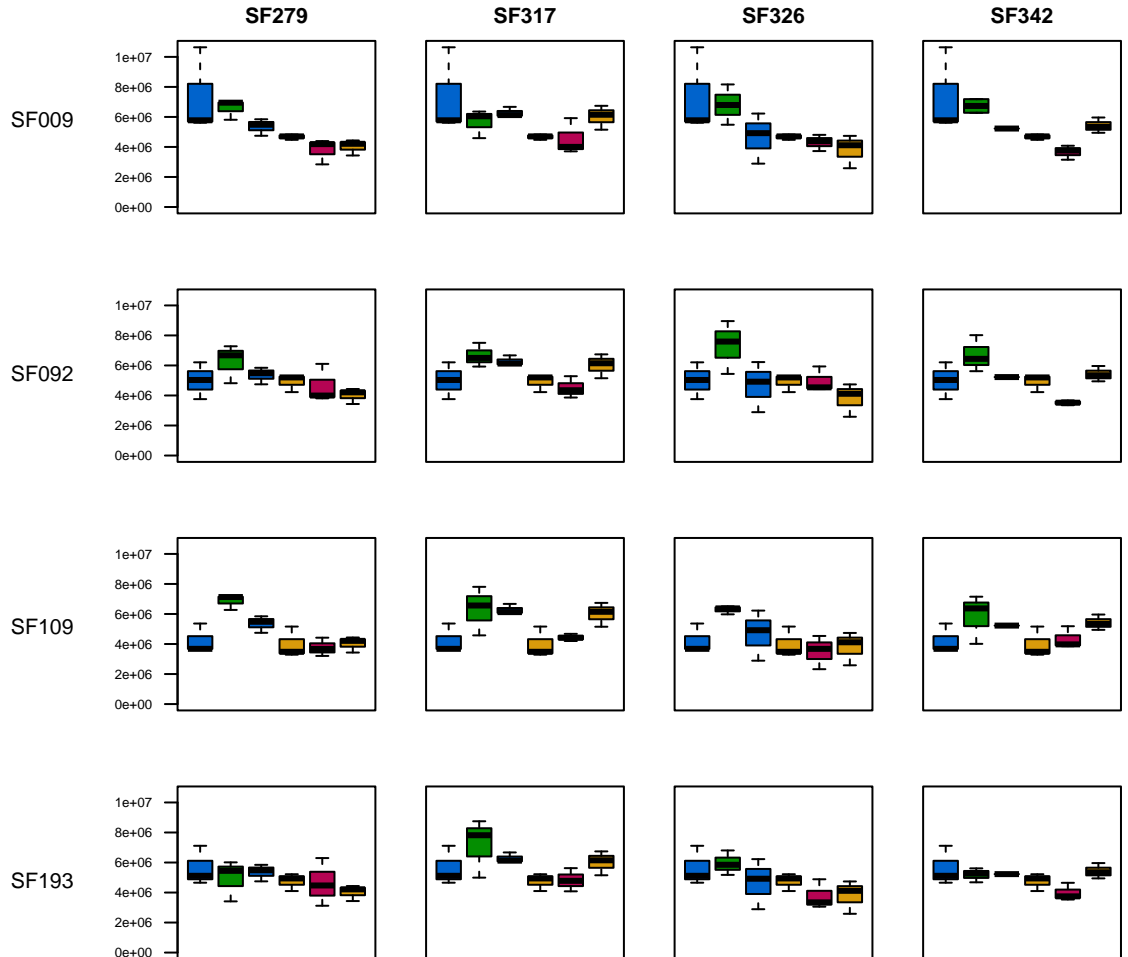

HanXRQChr10g0297151  
 Probable guanine nucleotide-binding  
 protein subunit beta-like protein

Parents WW  
 Parents WD  
 Hybrids WW  
 Hybrids WD

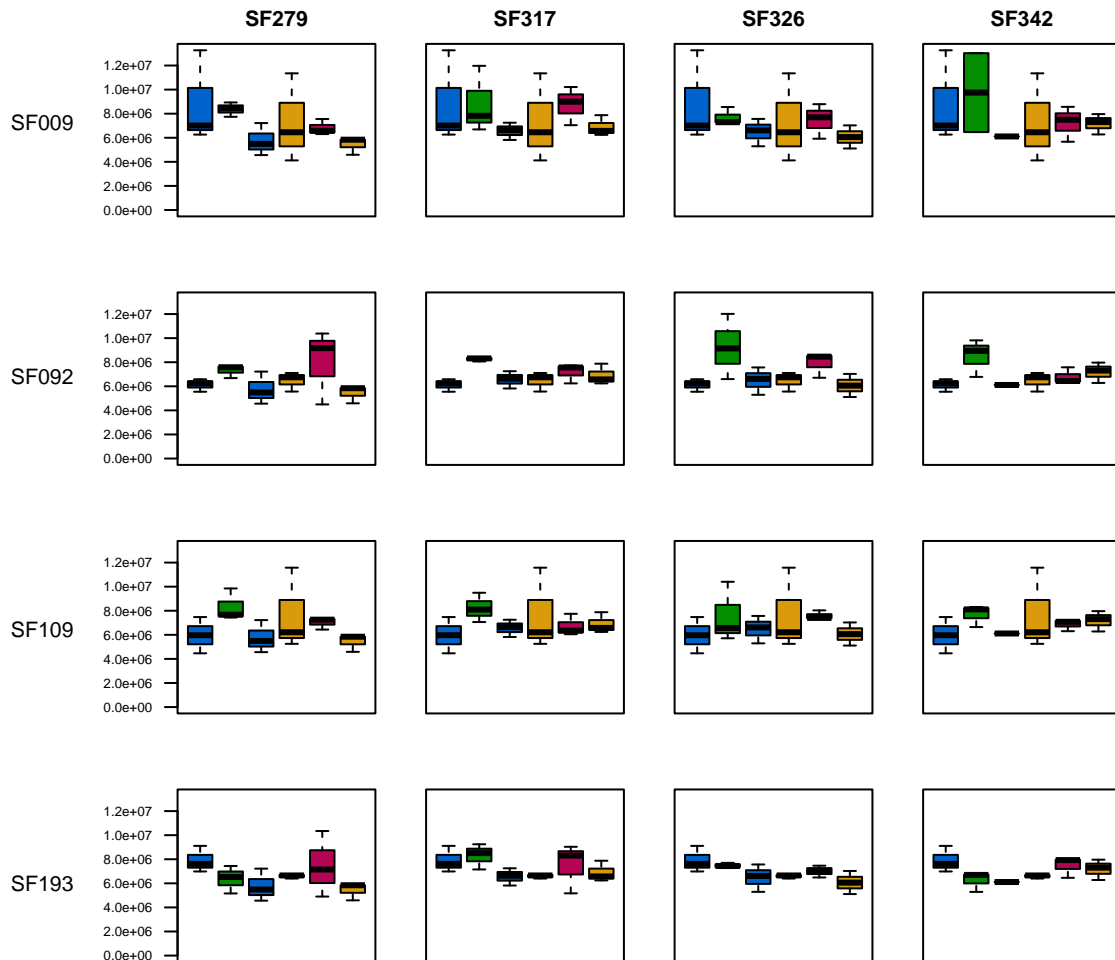

HanXRQChr05g0152001  
Probable 30S ribosomal protein S9,  
chloroplastic

Parents WW  
Parents WD  
Hybrids WW  
Hybrids WD

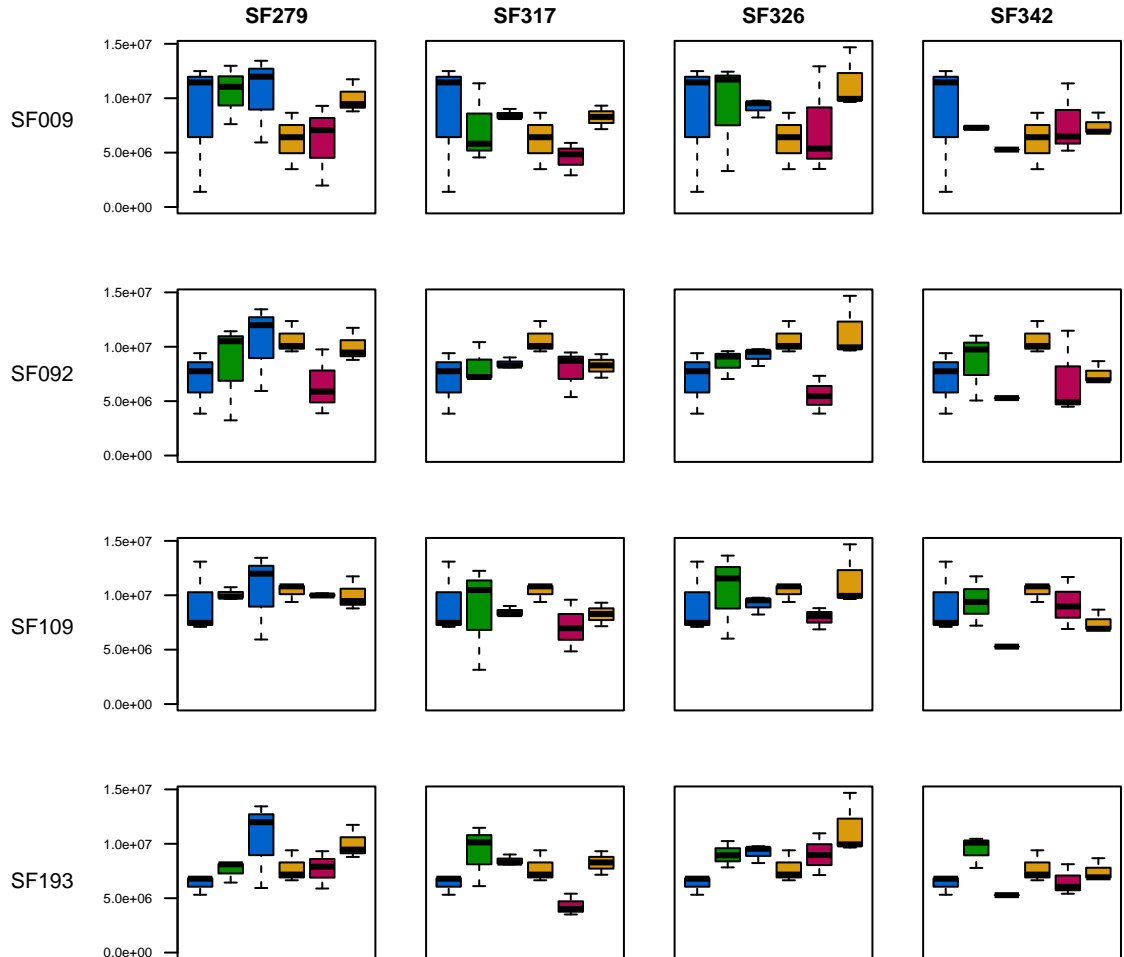

HanXRQChr11g0323781  
Probable phototropin 2

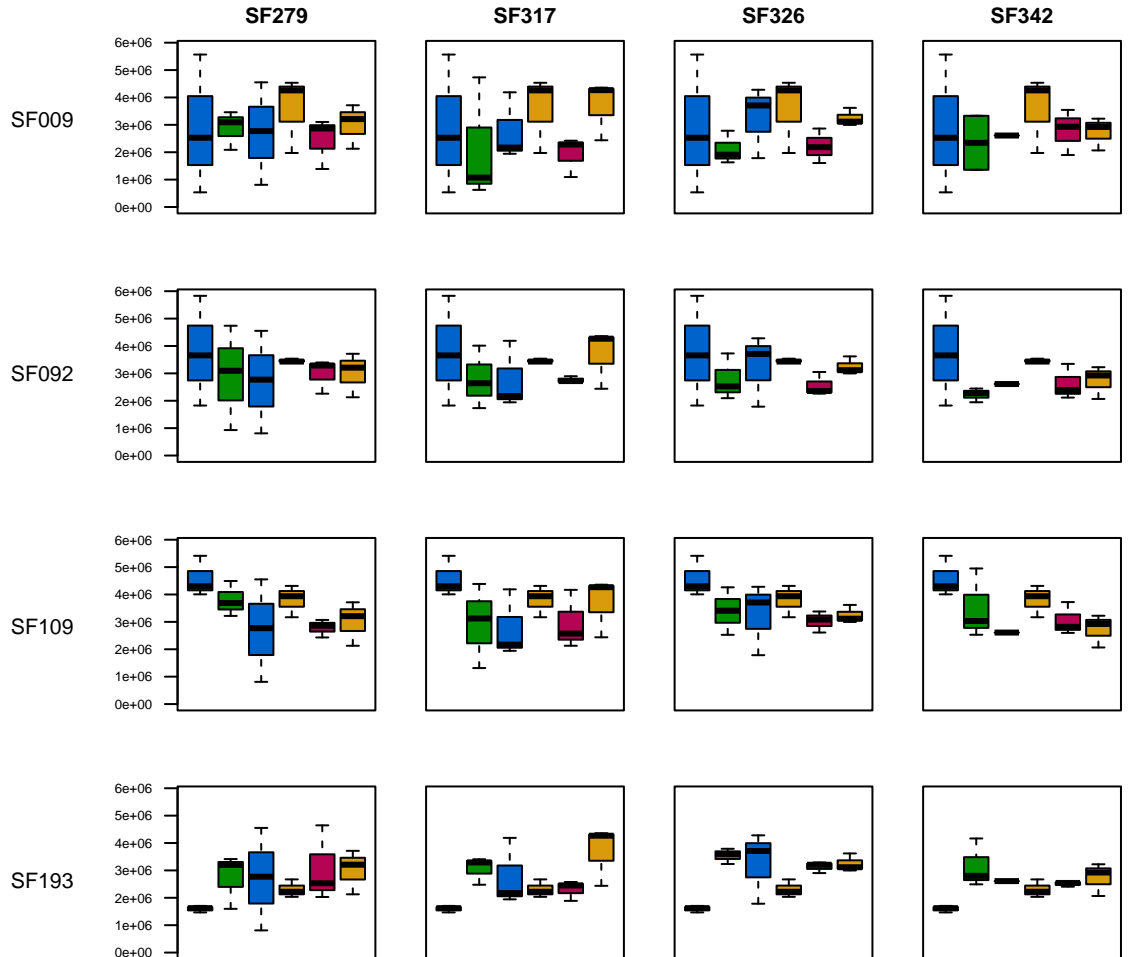



HanXRQCPg0579861  
Putative photosynthetic reaction  
centre, L/M; Photosystem antenna protein–

Parents WW  
Parents WD  
Hybrids WW  
Hybrids WD

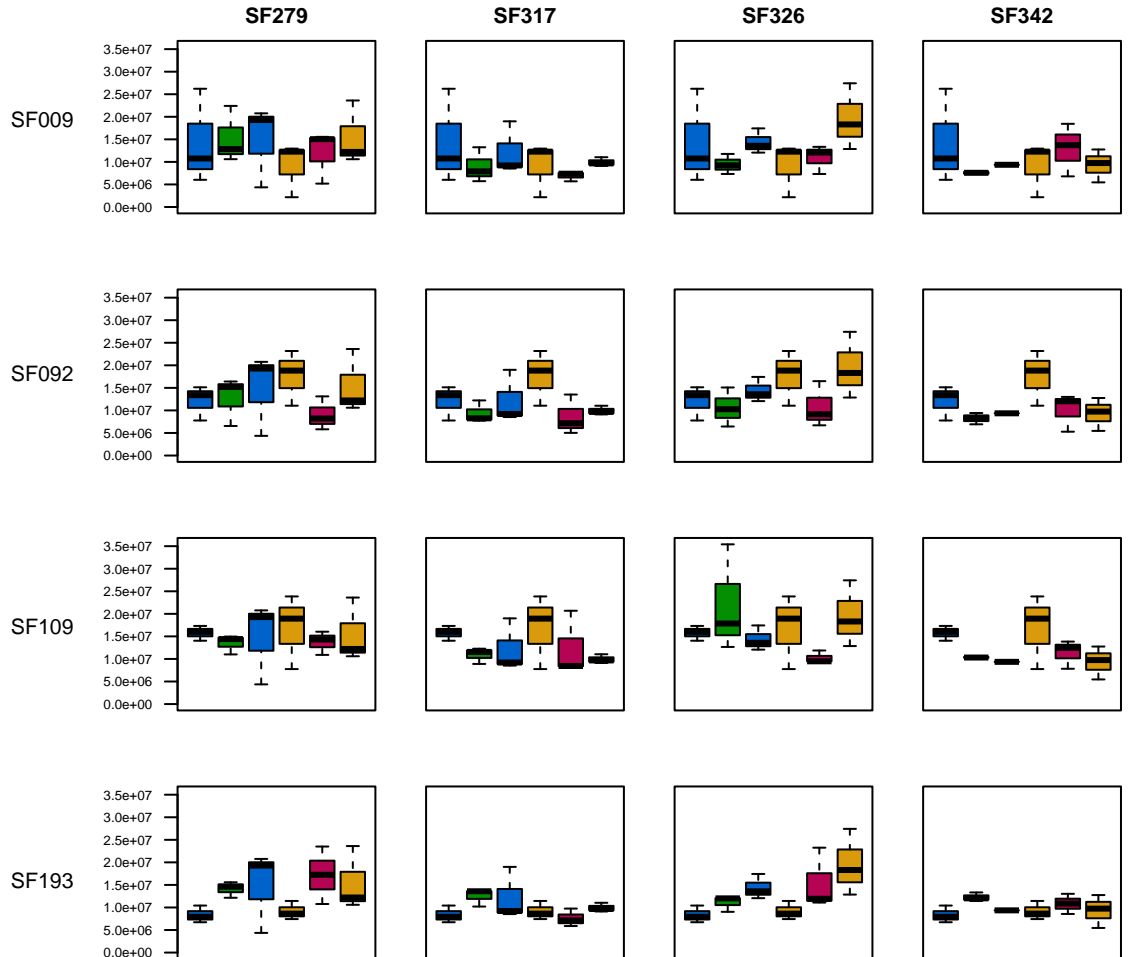

HanXRQChr05g0144711  
 Probable outer envelope pore protein  
 21, chloroplastic

Parents WW  
 Parents WD  
 Hybrids WW  
 Hybrids WD

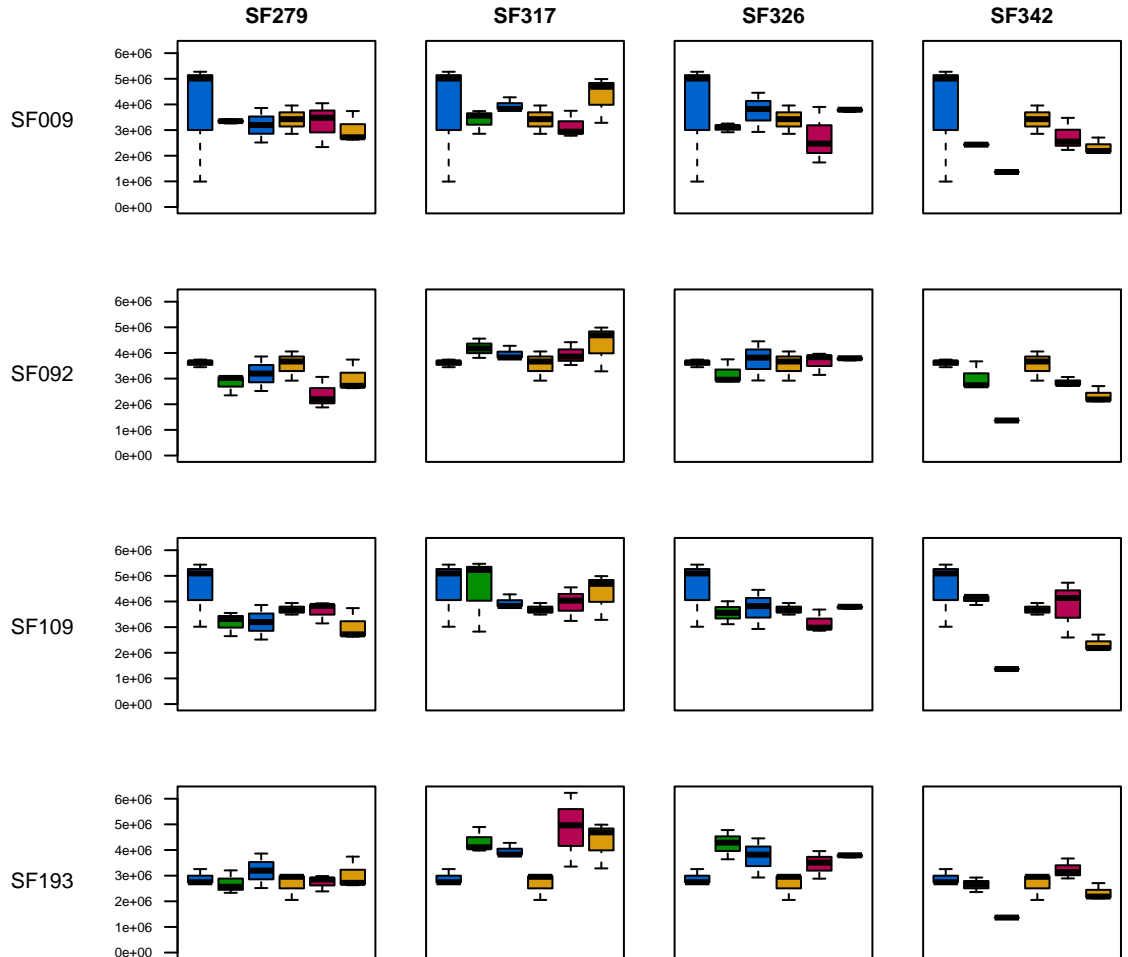

HanXRQChr15g0496641  
Putative vacuolar (H<sup>+</sup>)-ATPase G subunit

Parents WW  
Parents WD  
Hybrids WW  
Hybrids WD

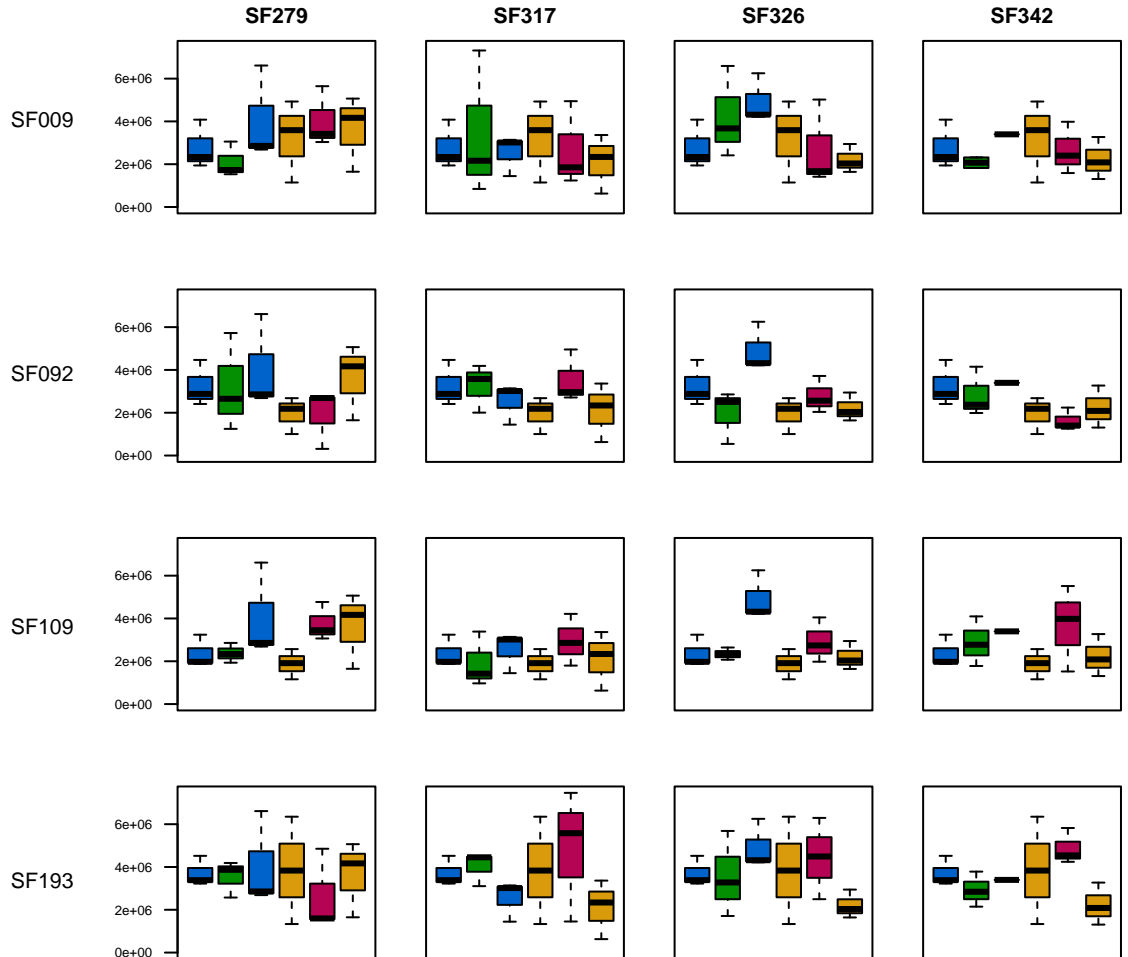

HanXRQChr02g0042031  
 Probable outer envelope pore protein  
 24, chloroplastic

Parents WW  
 Parents WD  
 Hybrids WW  
 Hybrids WD

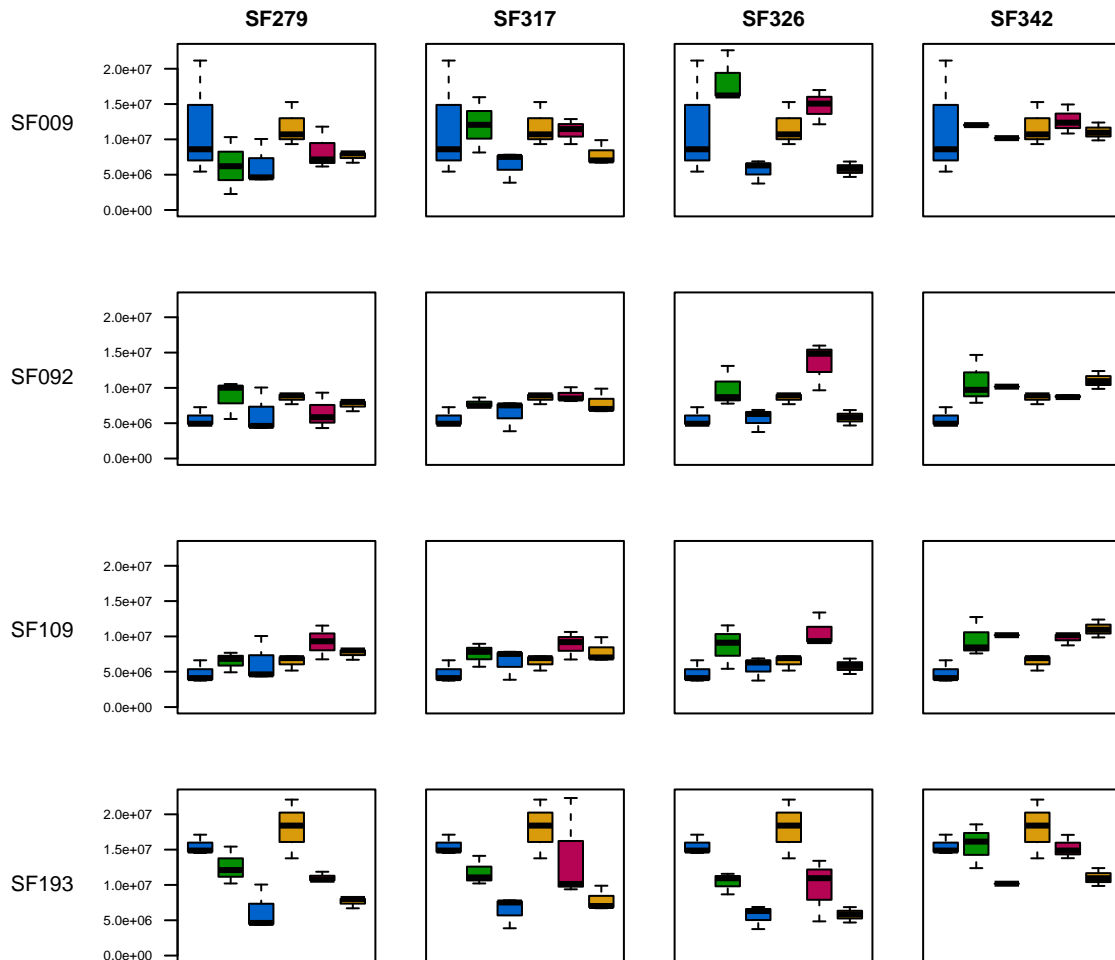

HanXRQChr14g0459081  
Probable argonaute family protein

Parents WW  
Parents WD  
Hybrids WW  
Hybrids WD

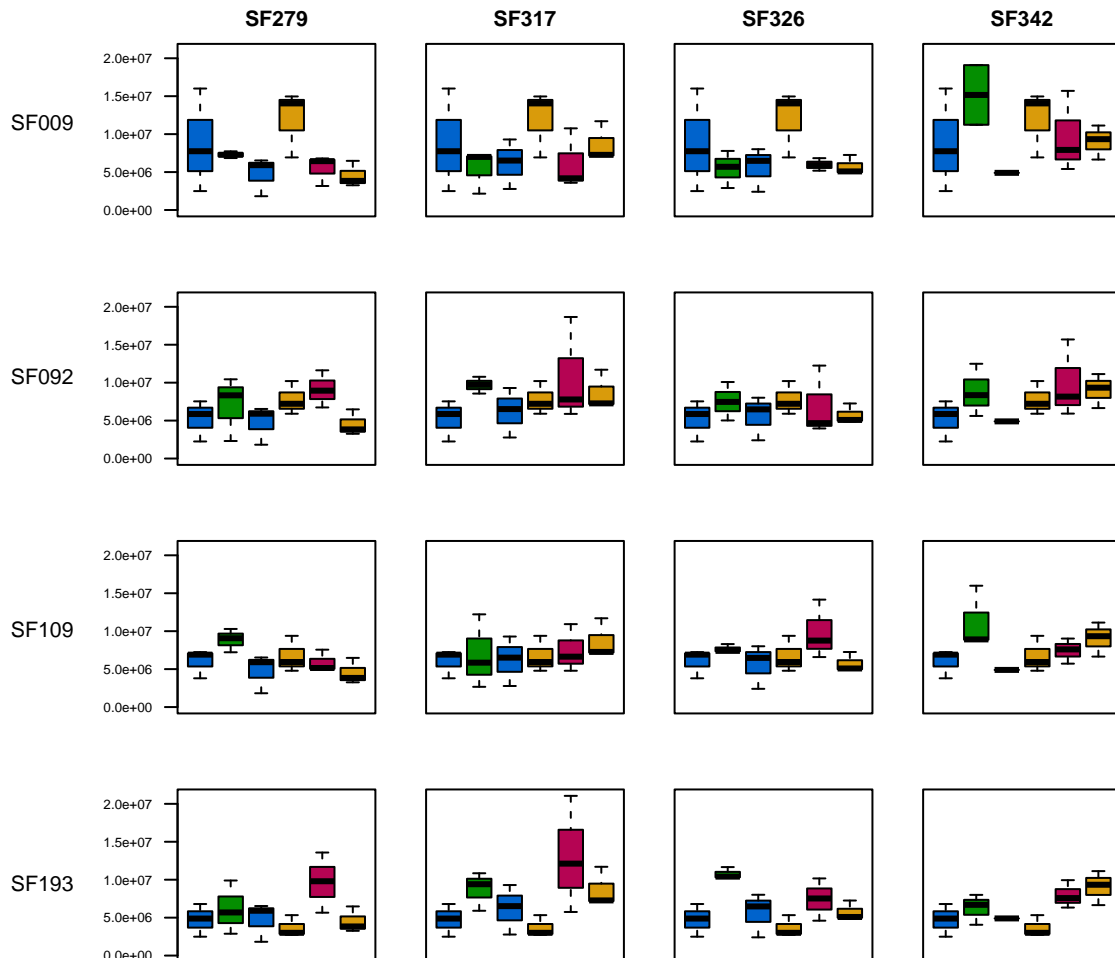

HanXRQChr10g0278811  
Probable ribosomal protein 1

Parents WW  
Parents WD  
Hybrids WW  
Hybrids WD

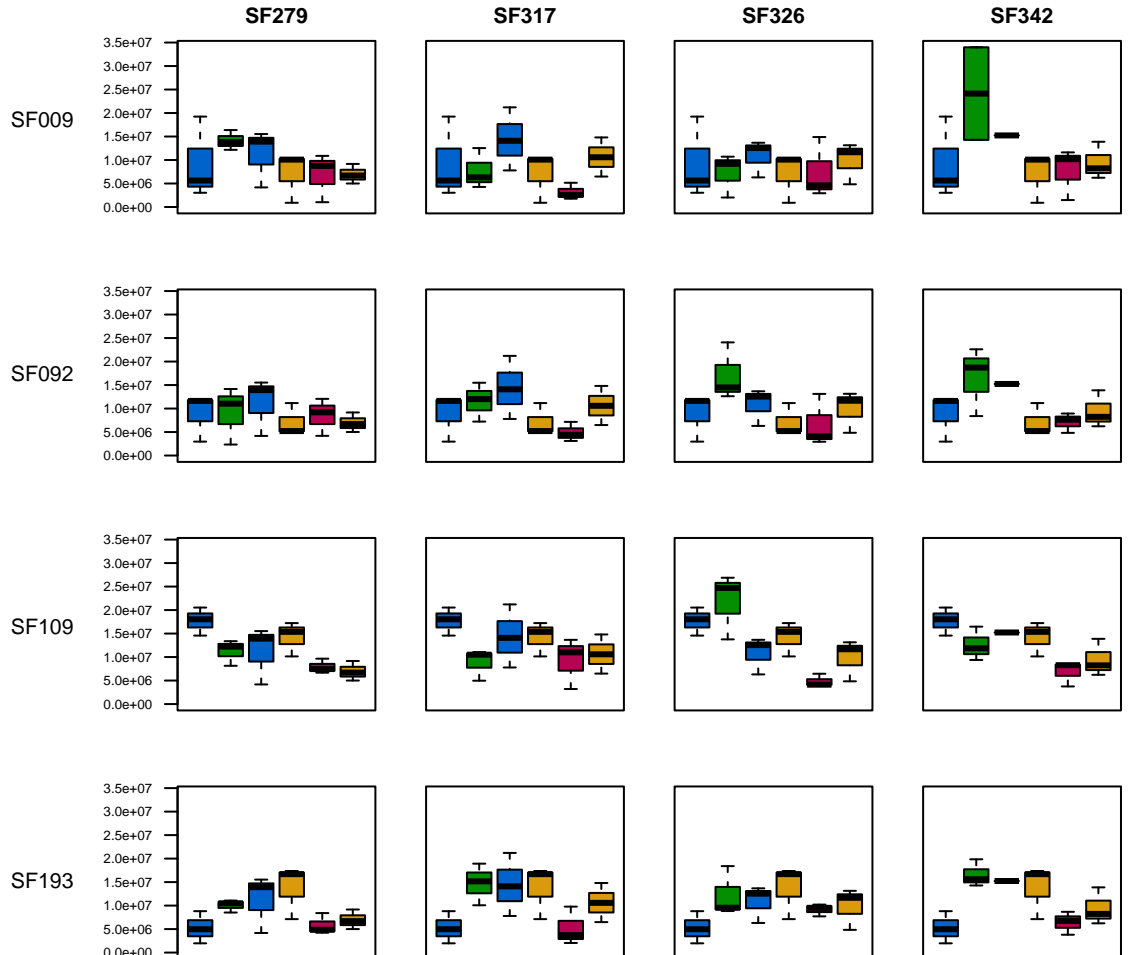

HanXRQChr02g0032631  
Putative P-loop containing nucleoside  
triphosphate hydrolase

Parents WW  
Parents WD  
Hybrids WW  
Hybrids WD

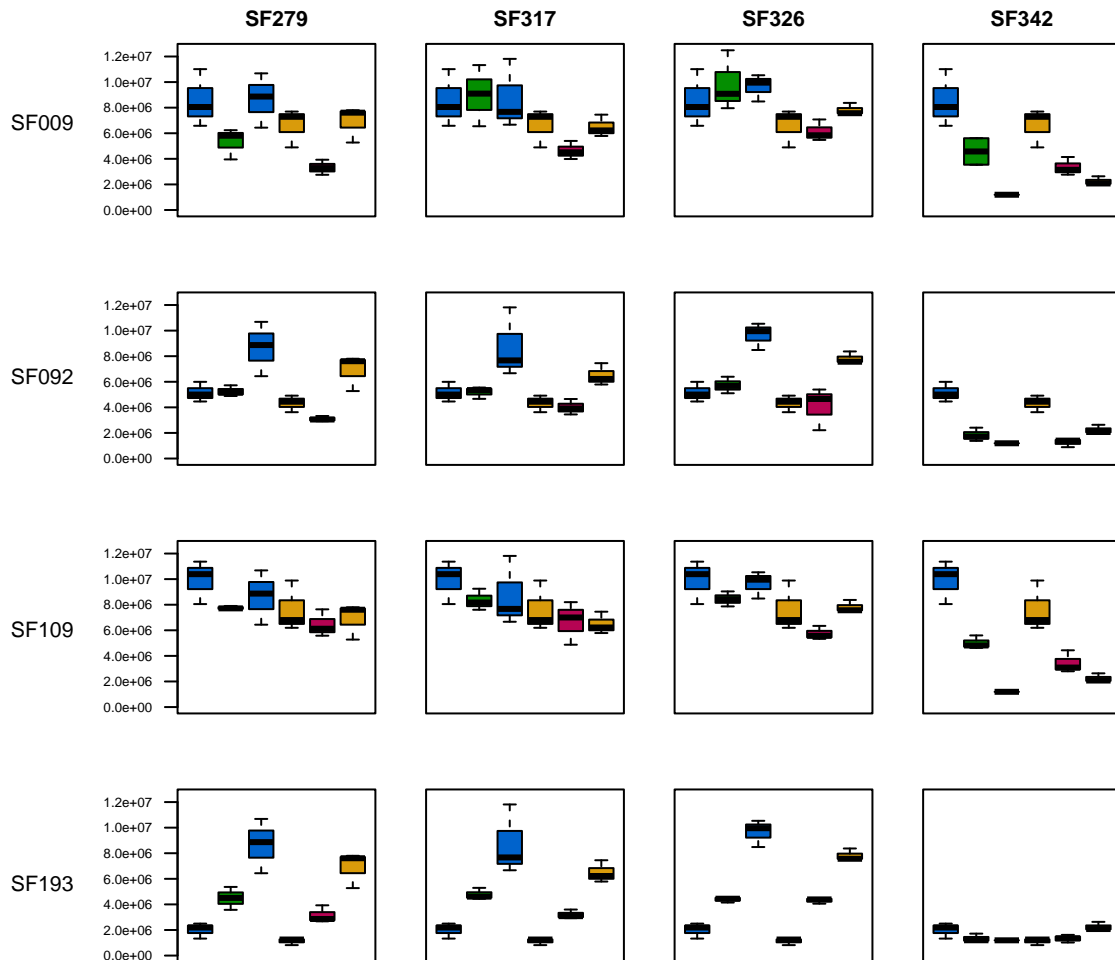

HanXRQChr10g0309871  
 Probable eukaryotic translation  
 initiation factor 3C

Parents WW  
 Parents WD  
 Hybrids WW  
 Hybrids WD

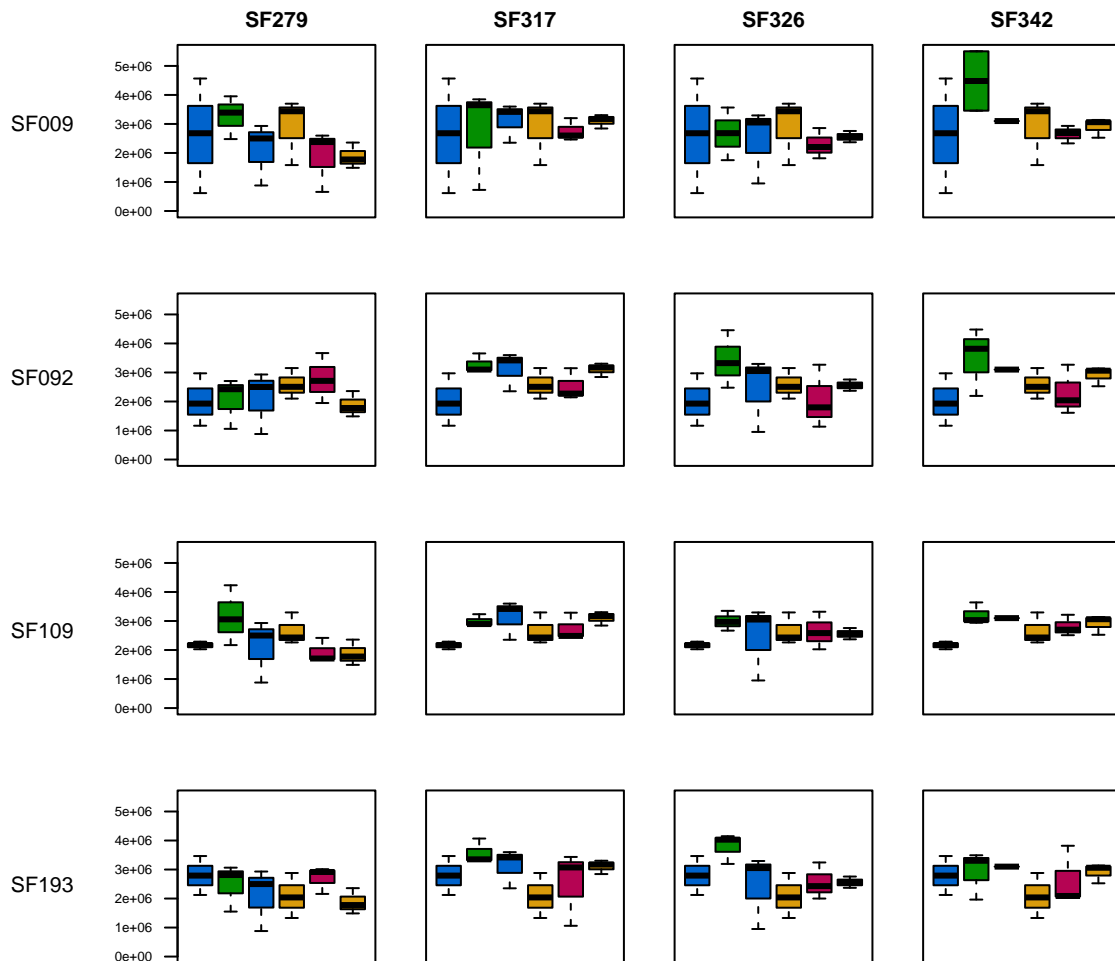



HanXRQChr08g0227691  
 Putative superoxide dismutase,  
 copper/zinc binding domain; Superoxide dis

■ Parents WW  
 ■ Parents WD  
 ■ Hybrids WW  
 ■ Hybrids WD

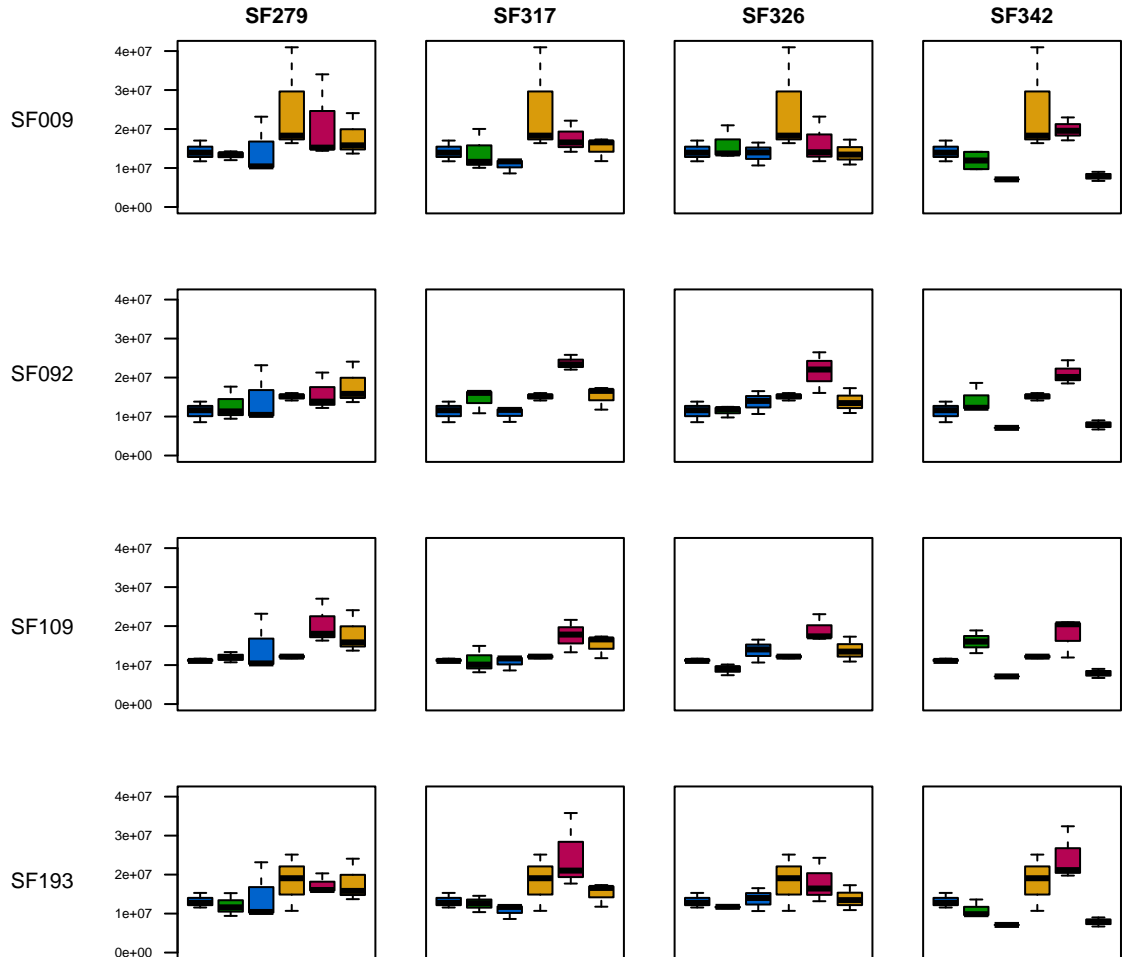

HanXRQChr04g0105951  
Probable ribosome-binding factor PSRP1,  
chloroplastic

Parents WW  
Parents WD  
Hybrids WW  
Hybrids WD

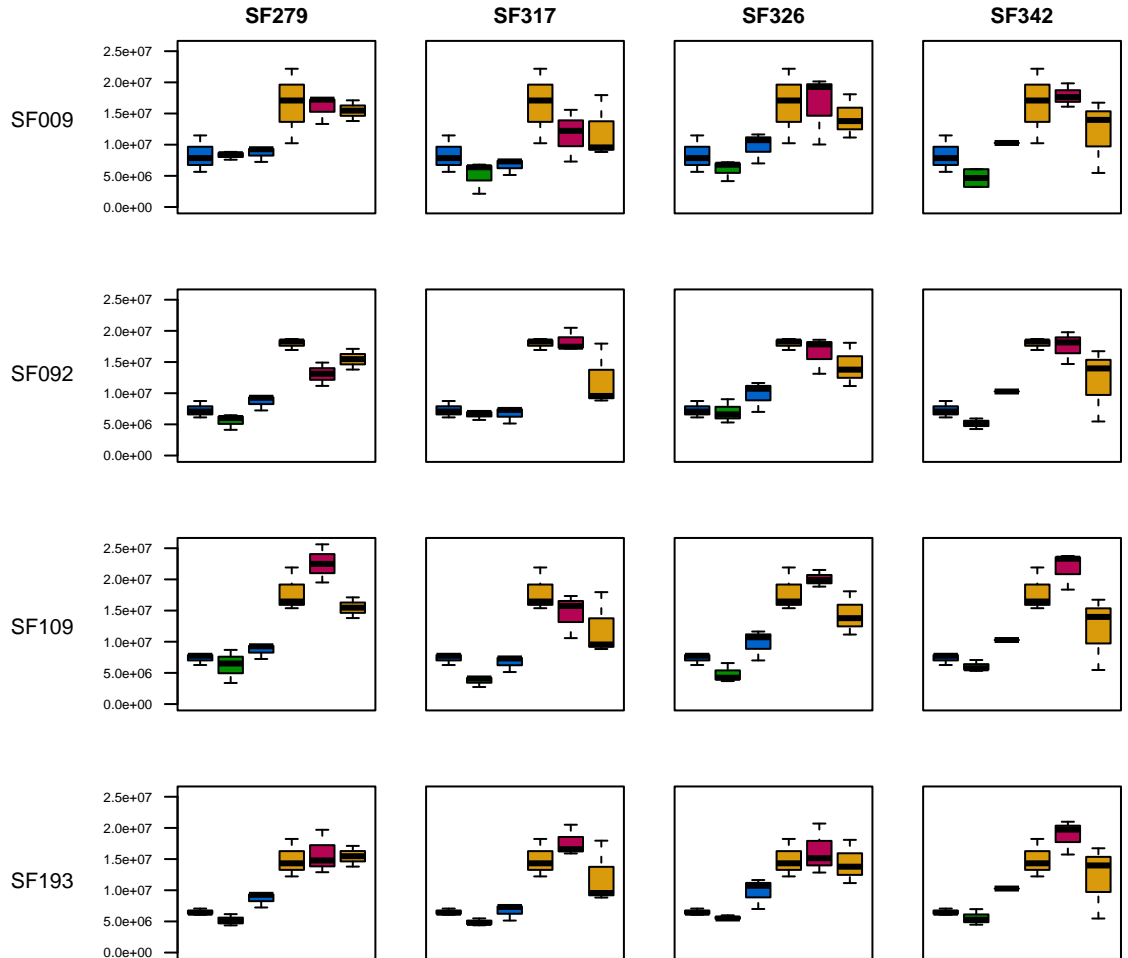

HanXRQChr09g0250121  
Probable ribulose biphosphate  
carboxylase/oxygenase activase 1, chloropl

Parents WW  
Parents WD  
Hybrids WW  
Hybrids WD

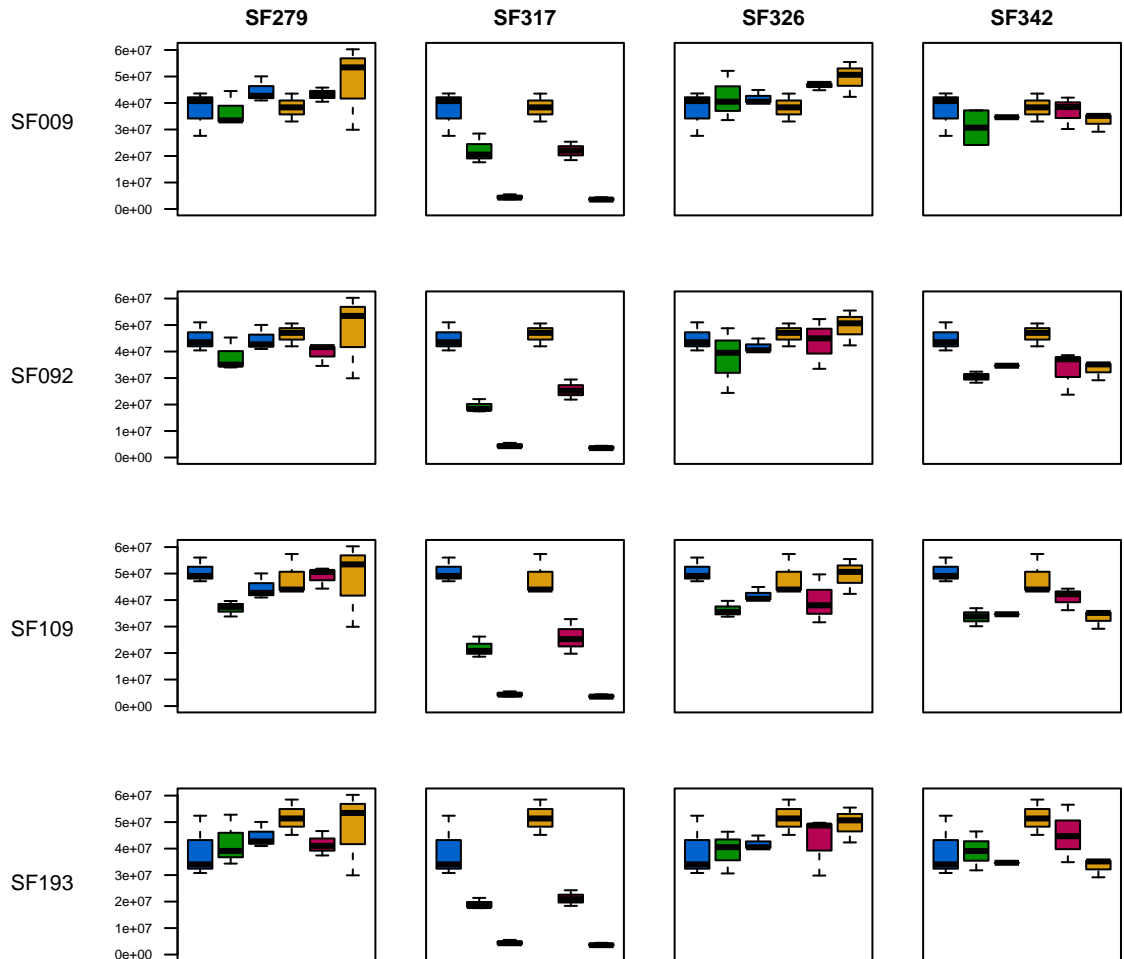

HanXRQChr08g0231041  
Probable cystathionine beta-synthase  
(CBS) family protein

Parents WW  
Parents WD  
Hybrids WW  
Hybrids WD

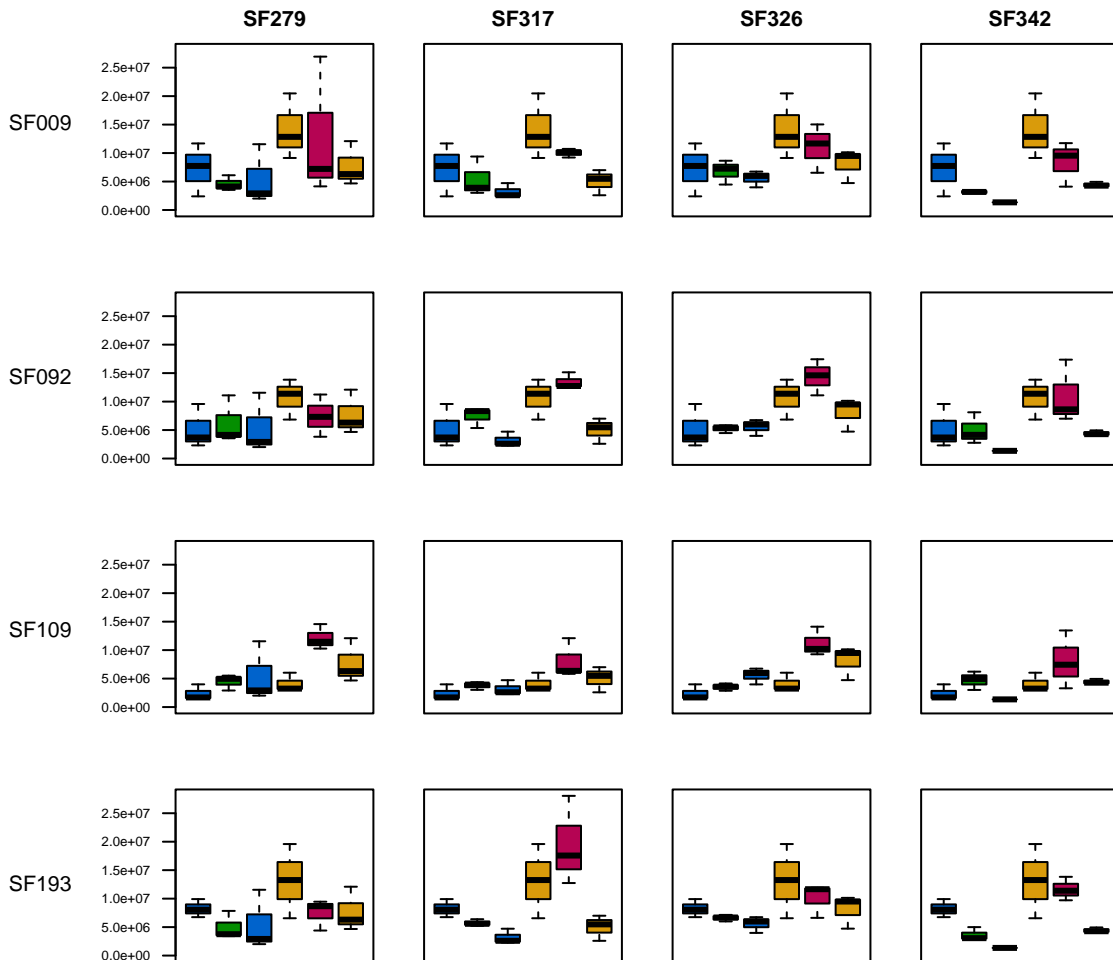

HanXRQChr01g0023061  
 Probable glutamyl-tRNA(Gln)  
 amidotransferase subunit B, chloroplastic/m

Parents WW  
 Parents WD  
 Hybrids WW  
 Hybrids WD

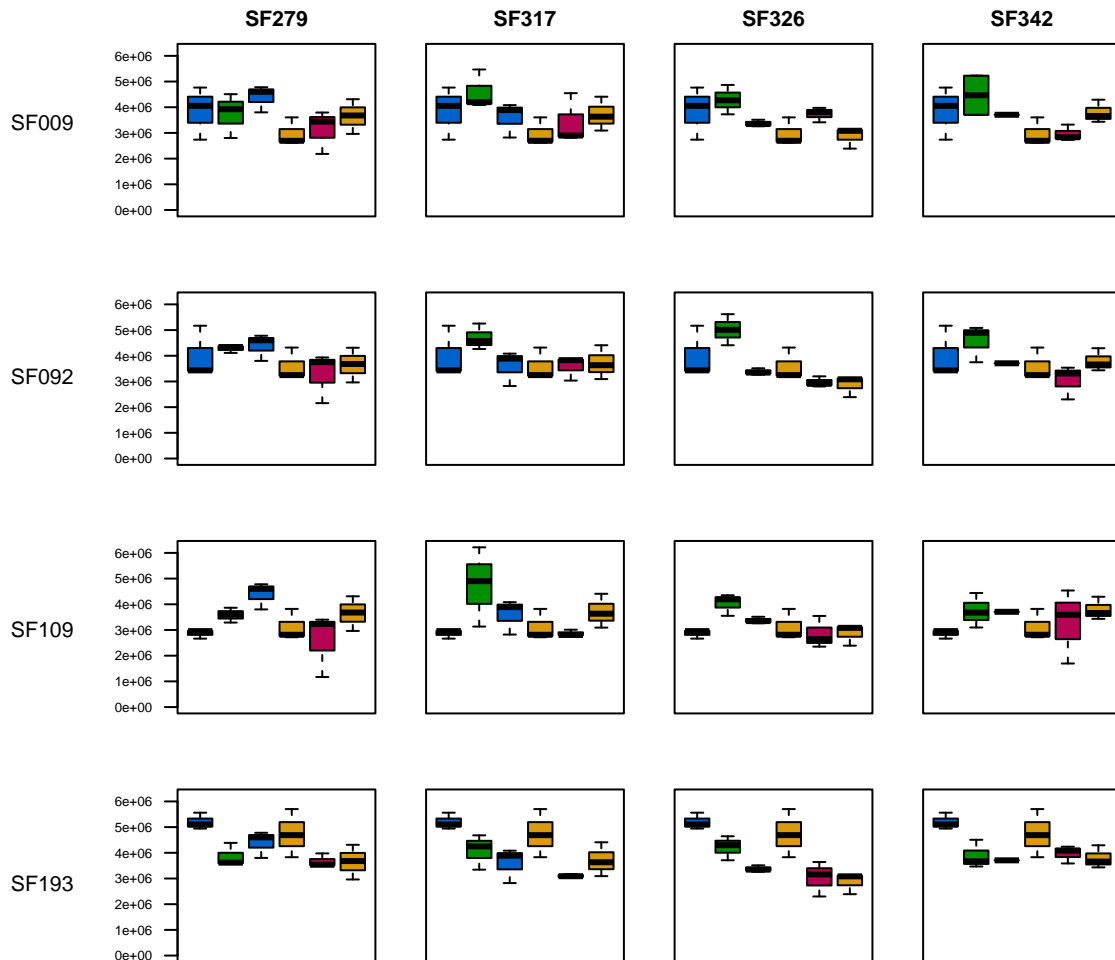

HanXRQChr15g0480911  
Probable class II aaRS and biotin  
synthetases superfamily protein

Parents WW  
Parents WD  
Hybrids WW  
Hybrids WD

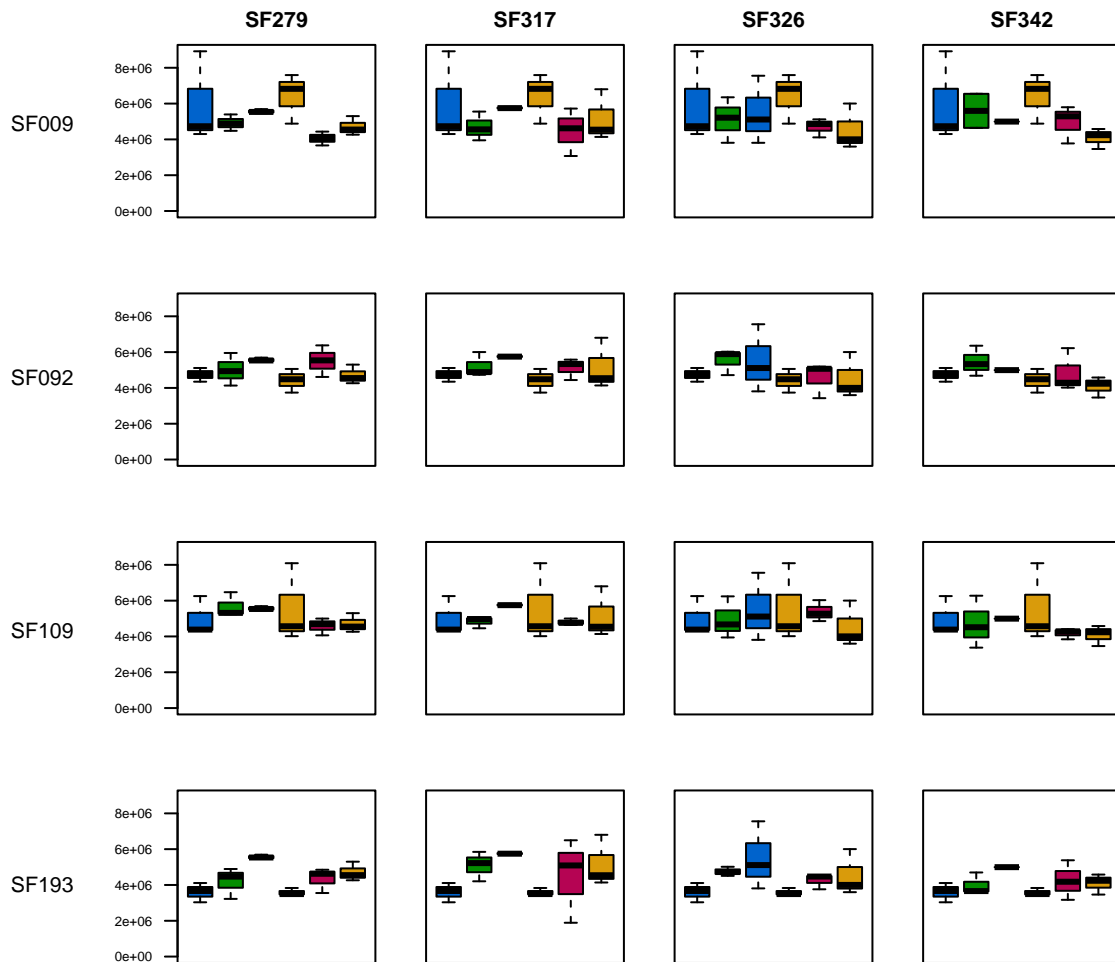

HanXRQChr12g0360281  
Putative germin

- Parents WW
- Parents WD
- Hybrids WW
- Hybrids WD

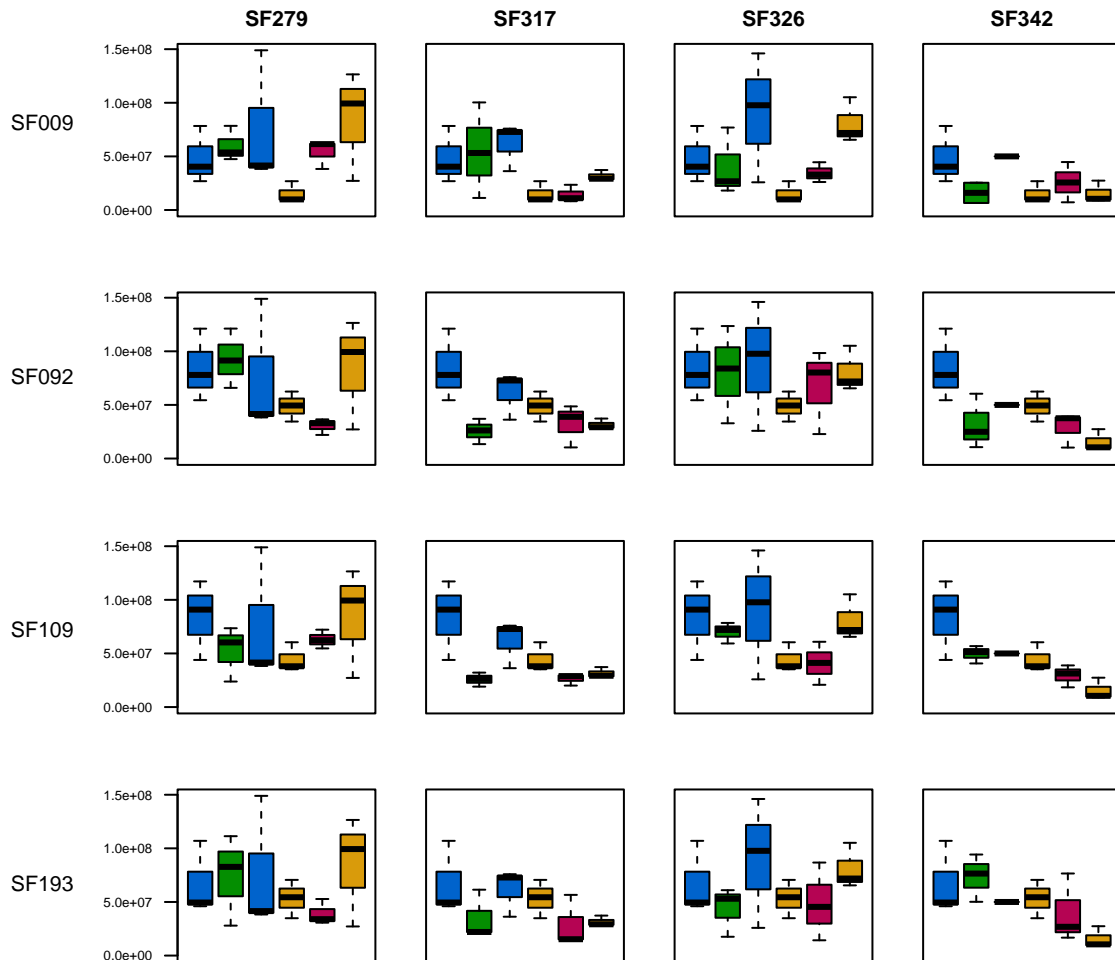

HanXRQChr06g0175151  
Probable cytochrome b-c1 complex  
subunit Rieske, mitochondrial

Parents WW  
Parents WD  
Hybrids WW  
Hybrids WD

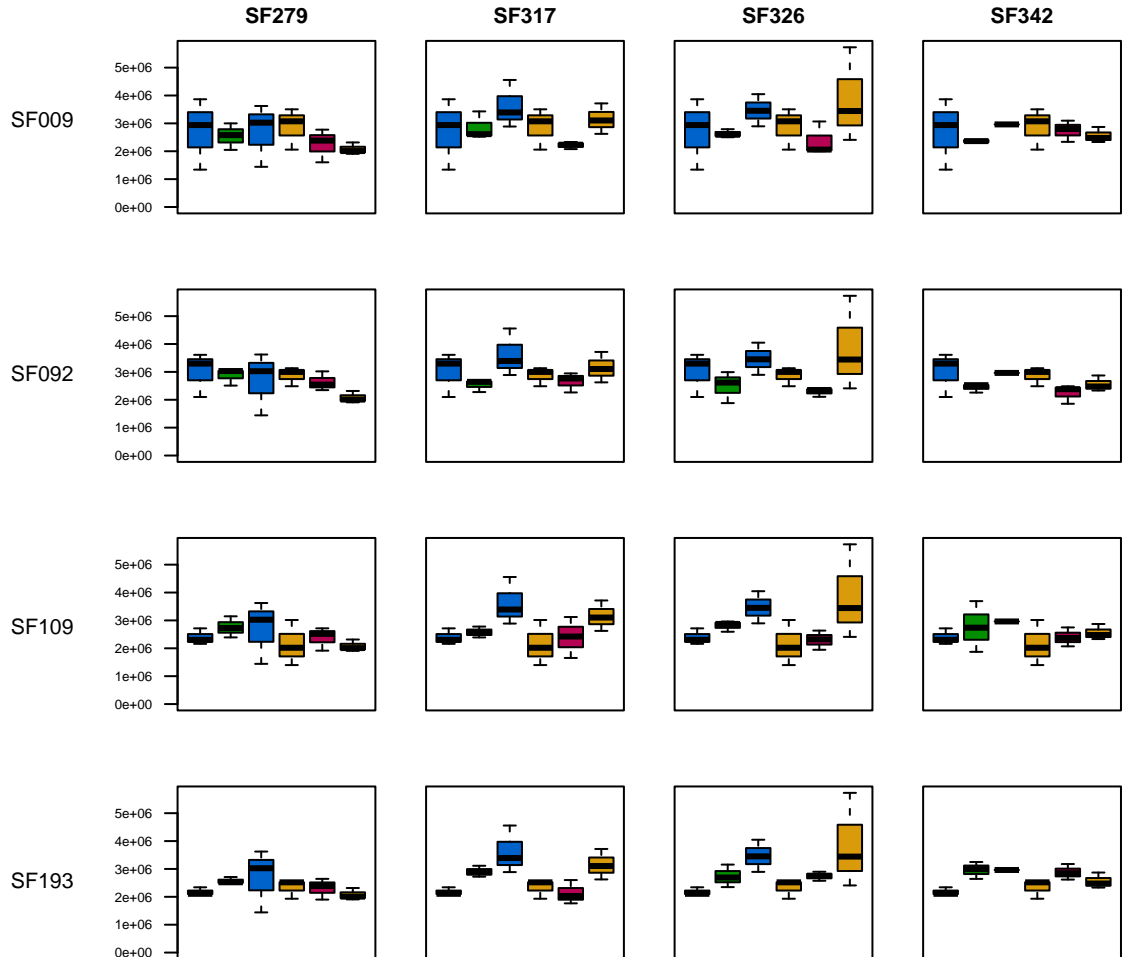



HanXRQChr04g0108311  
 Probable oxidoreductase, zinc-binding  
 dehydrogenase family protein

Parents WW  
 Parents WD  
 Hybrids WW  
 Hybrids WD

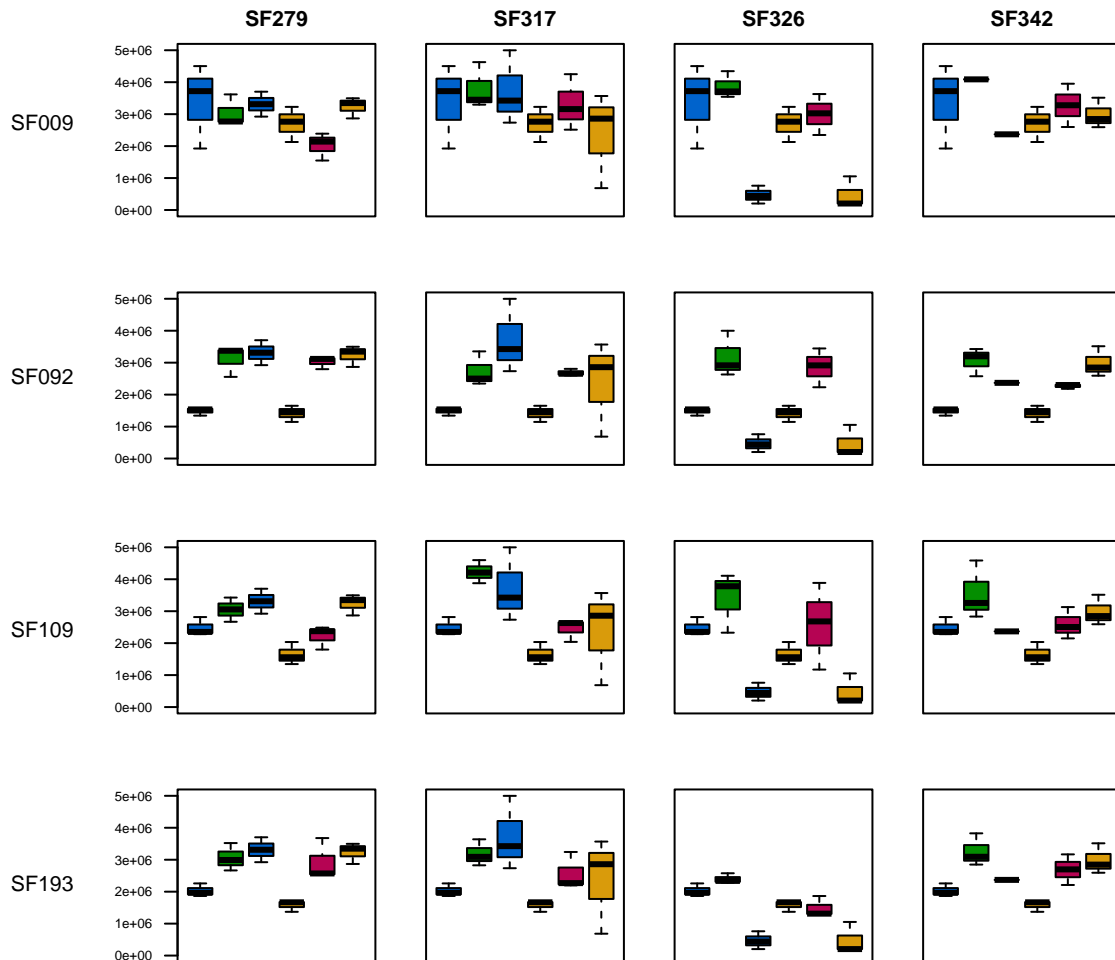

HanXRQChr12g0368401  
Probable S-adenosylmethionine carrier 1

Parents WW  
Parents WD  
Hybrids WW  
Hybrids WD

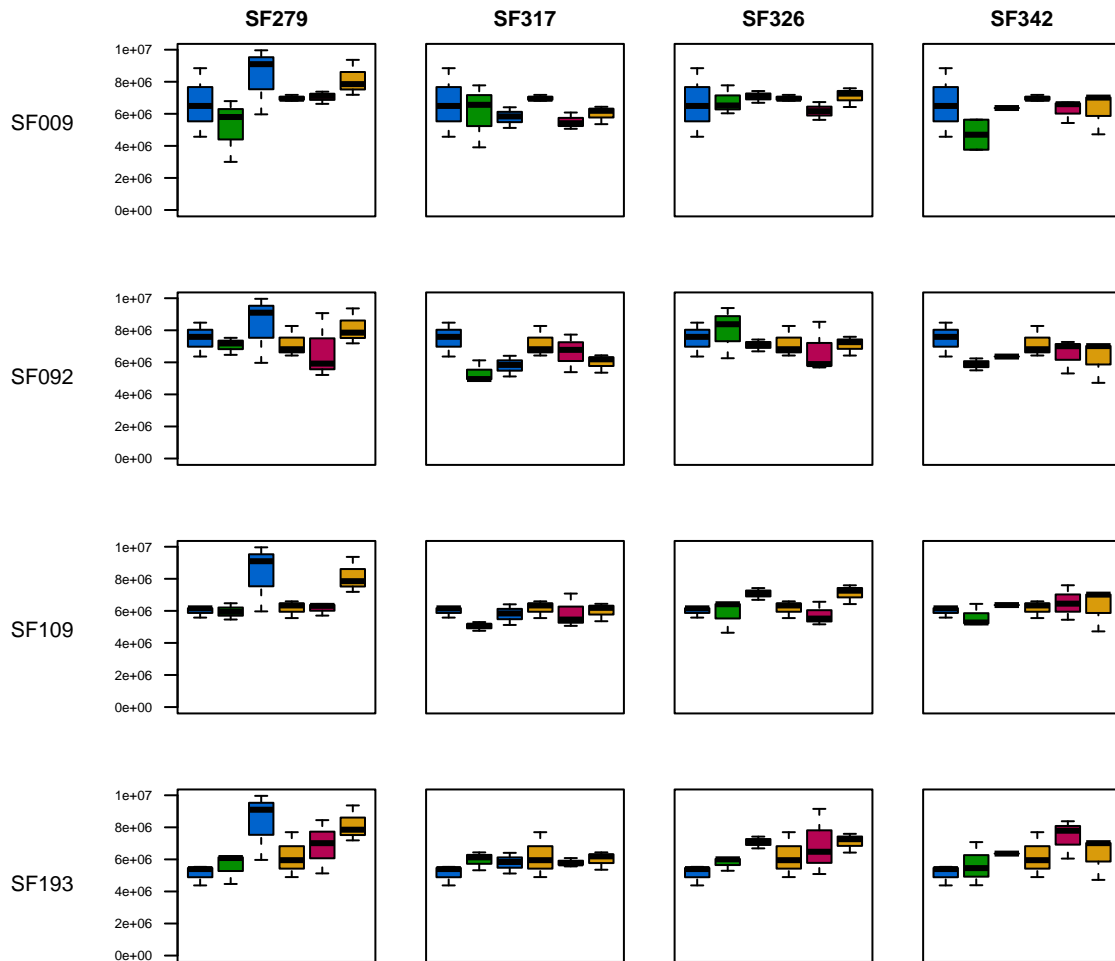

HanXRQChr16g0497701  
 Putative translation elongation factor  
 EF1B/ribosomal protein S6

Parents WW  
 Parents WD  
 Hybrids WW  
 Hybrids WD

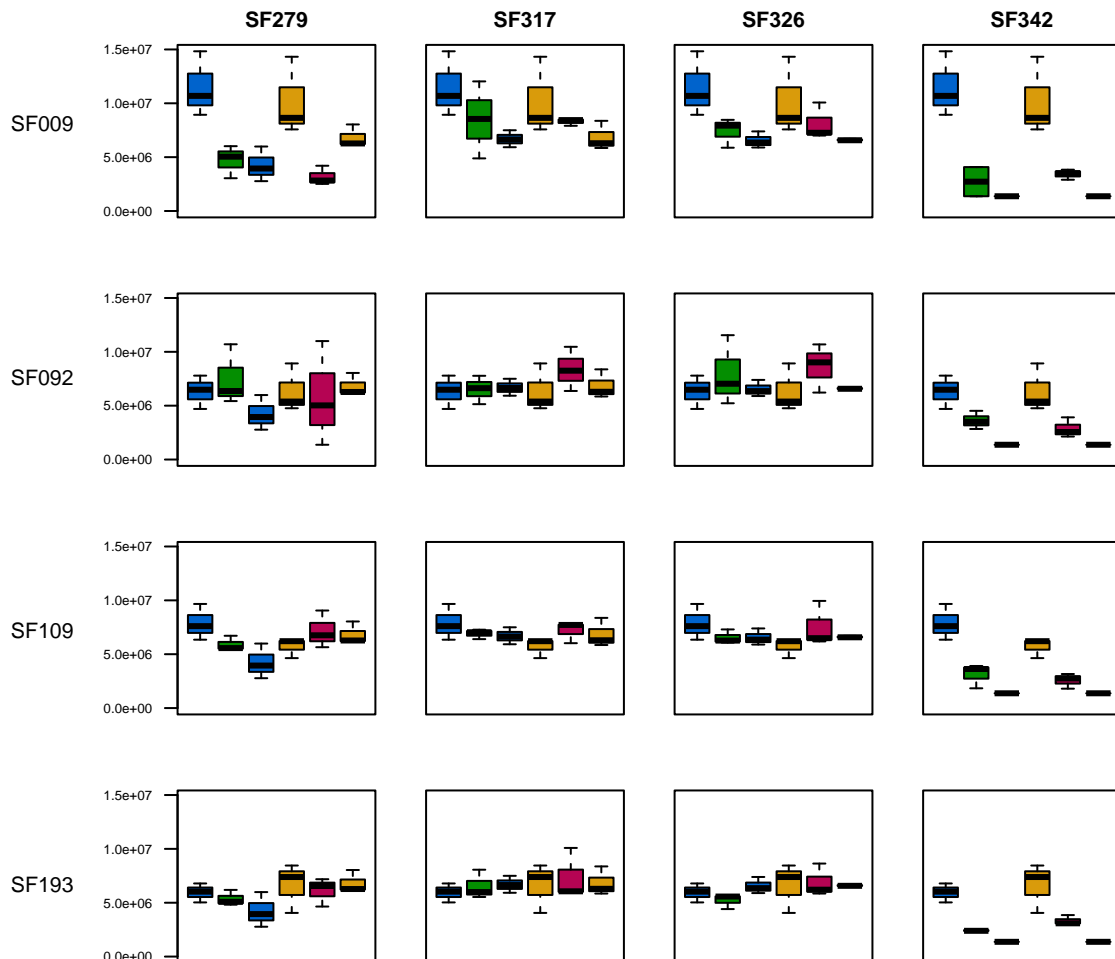

HanXRQChr05g0129471  
 Putative glyoxalase I;  
 Glyoxalase/Bleomycin resistance protein/Di

Parents WW  
 Parents WD  
 Hybrids WW  
 Hybrids WD

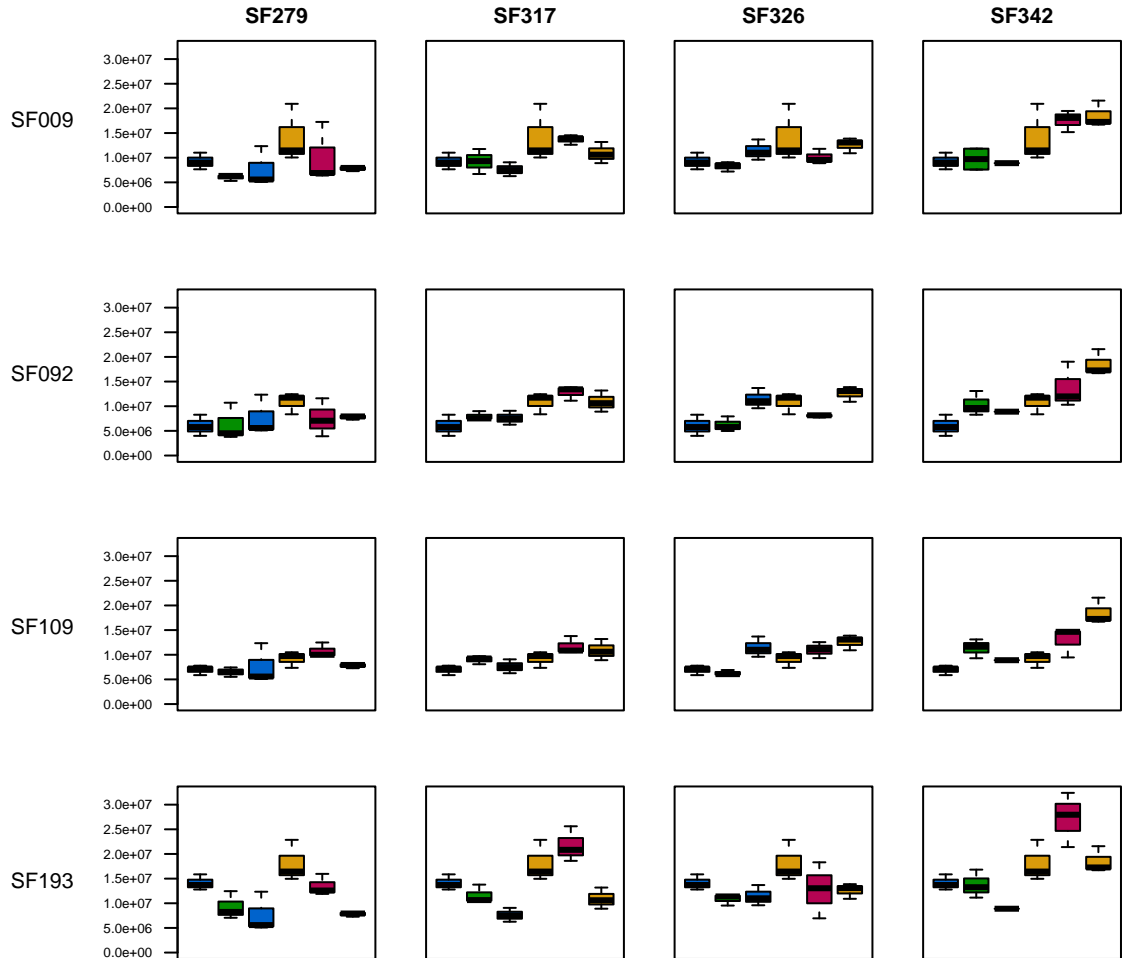

HanXRQChr15g0490811  
 Probable cystathionine beta-synthase  
 (CBS) family protein

Parents WW  
 Parents WD  
 Hybrids WW  
 Hybrids WD

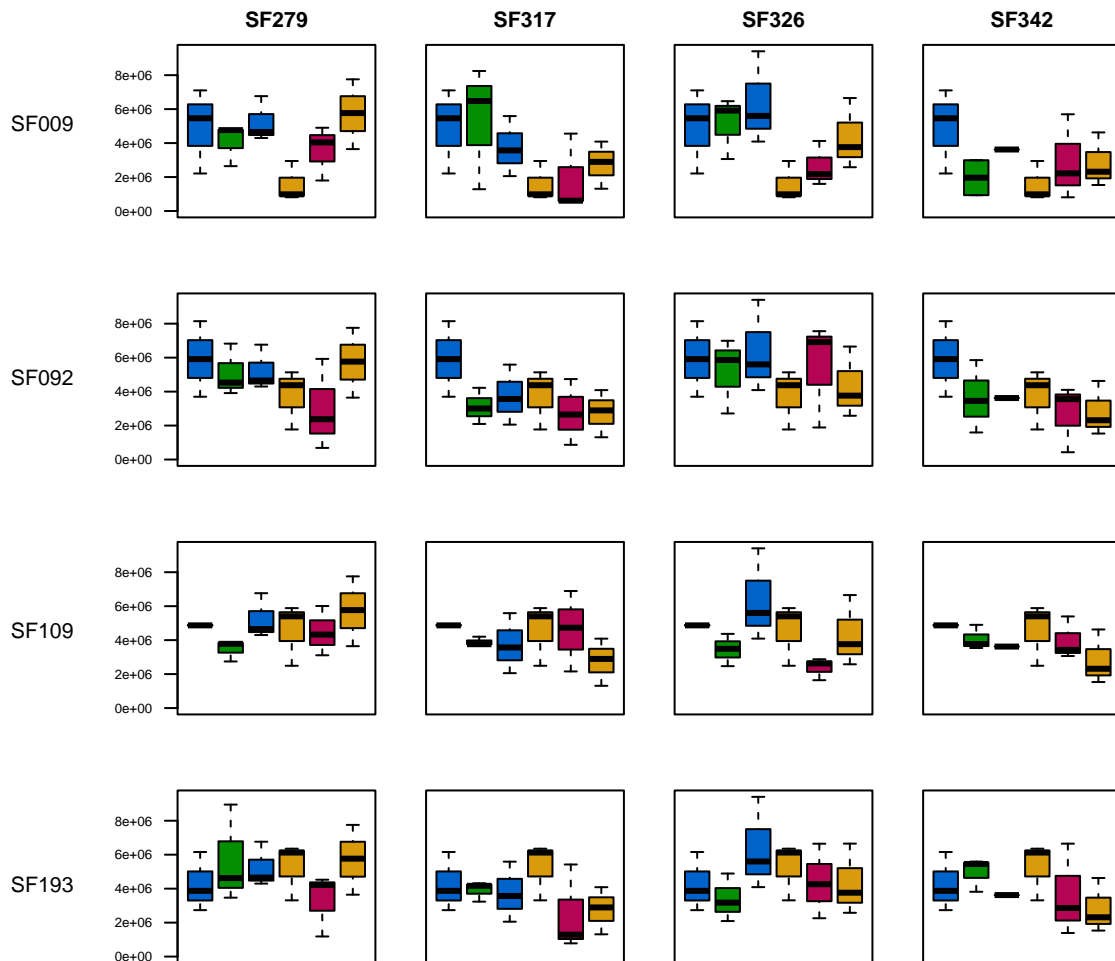

HanXRQChr11g0346211  
 Putative glyoxalase I;  
 Glyoxalase/Bleomycin resistance protein/Di

Parents WW  
 Parents WD  
 Hybrids WW  
 Hybrids WD

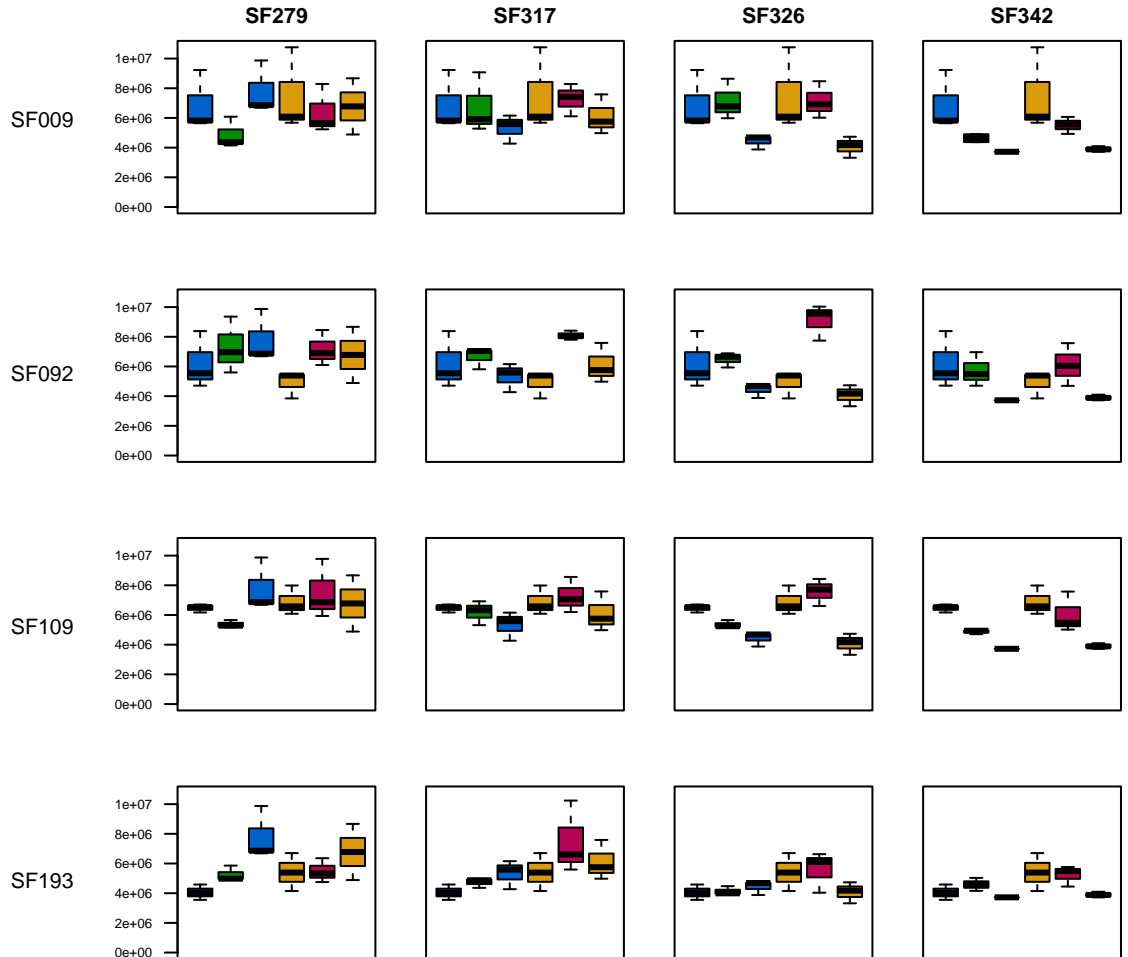

HanXRQChr12g0356851  
Probable purple acid phosphatase 26

- Parents WW
- Parents WD
- Hybrids WW
- Hybrids WD

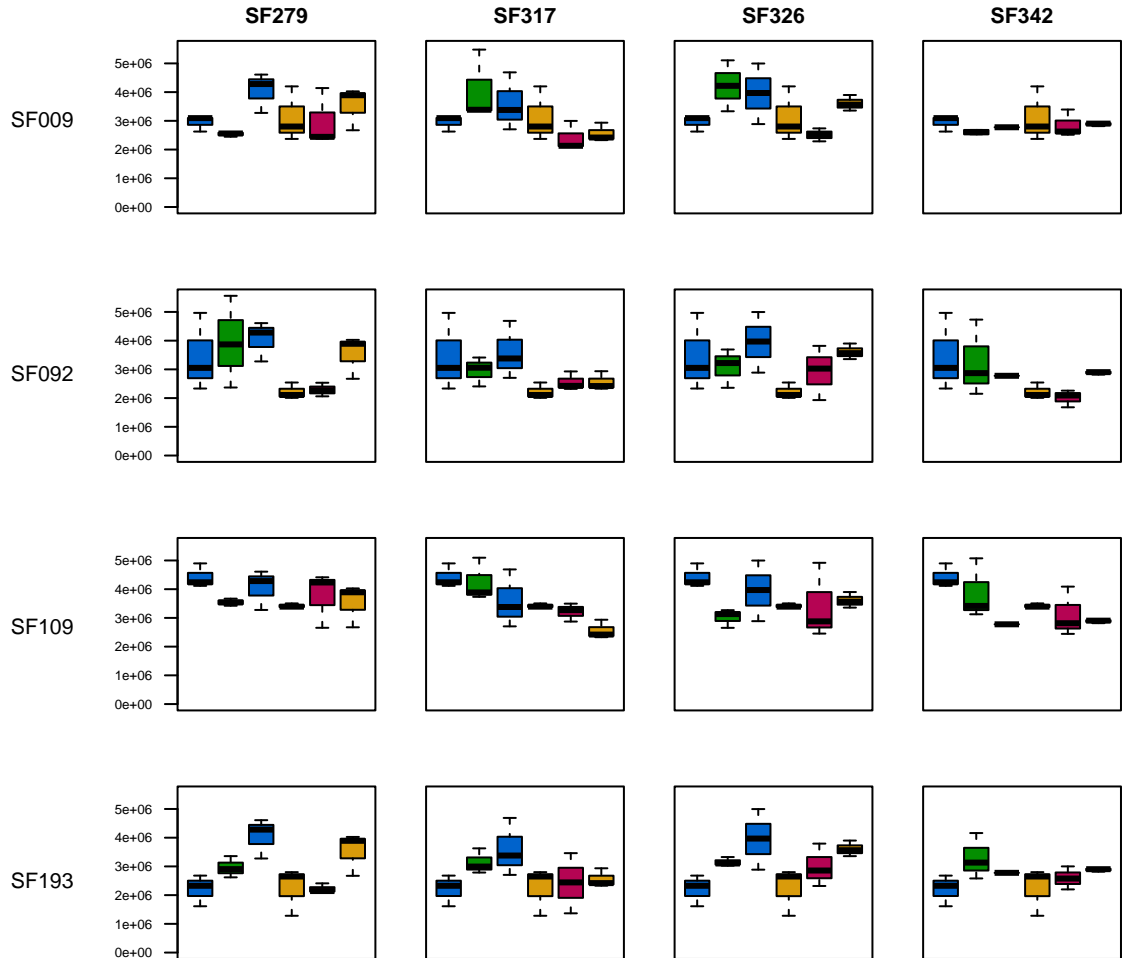

HanXRQChr06g0182071  
Probable temperature-induced lipocalin

- Parents WW
- Parents WD
- Hybrids WW
- Hybrids WD

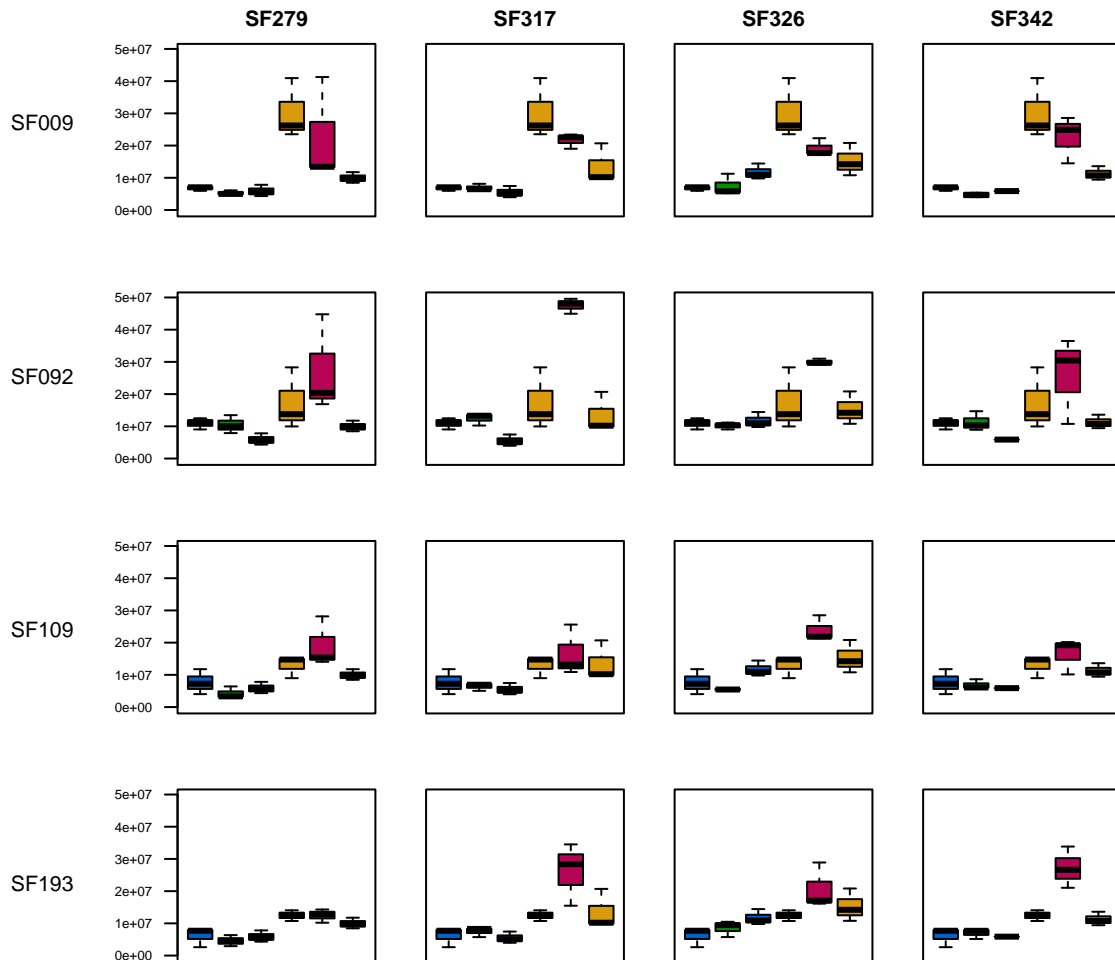



HanXRQChr05g0157551  
Probable 4-coumarate--CoA ligase 2

Parents WW  
Parents WD  
Hybrids WW  
Hybrids WD

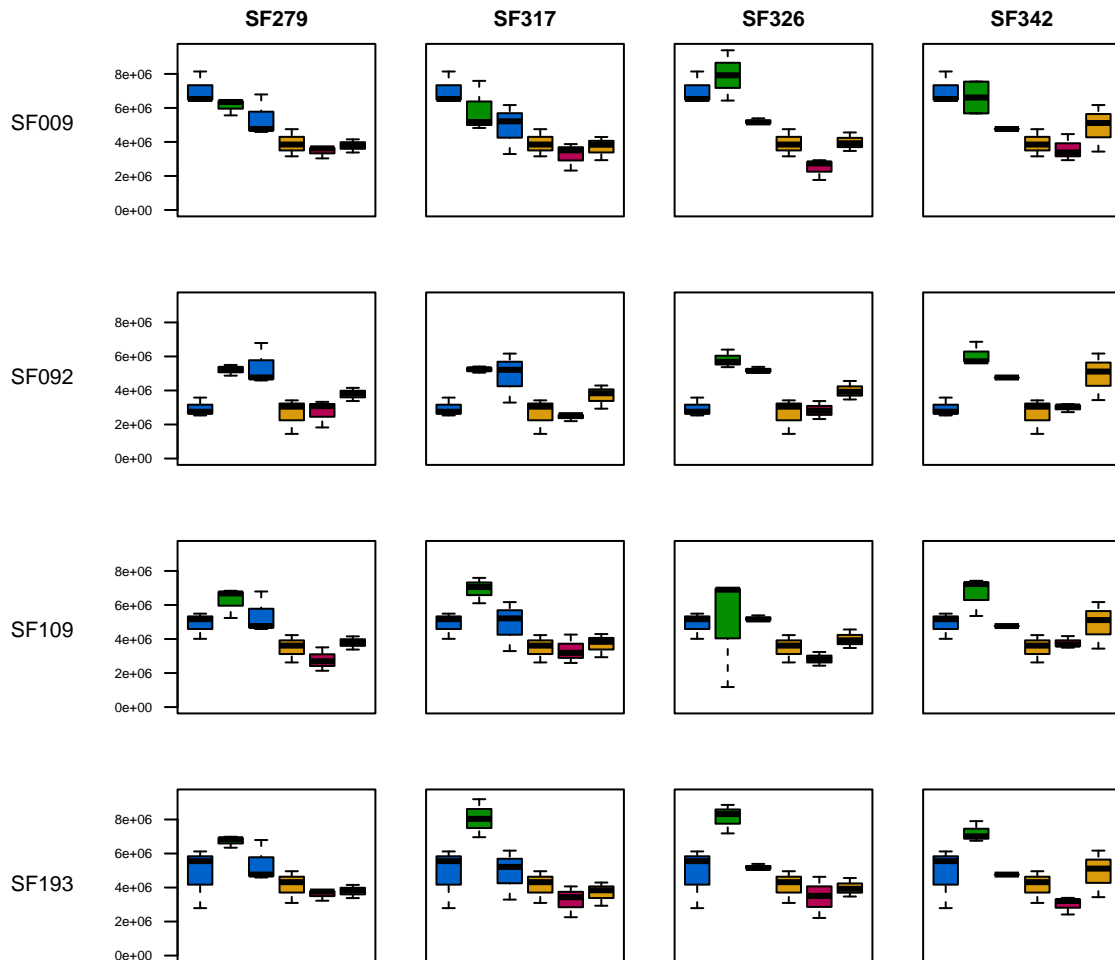

HanXRQChr09g0266971  
Probable NADPH:quinone oxidoreductase

- Parents WW
- Parents WD
- Hybrids WW
- Hybrids WD

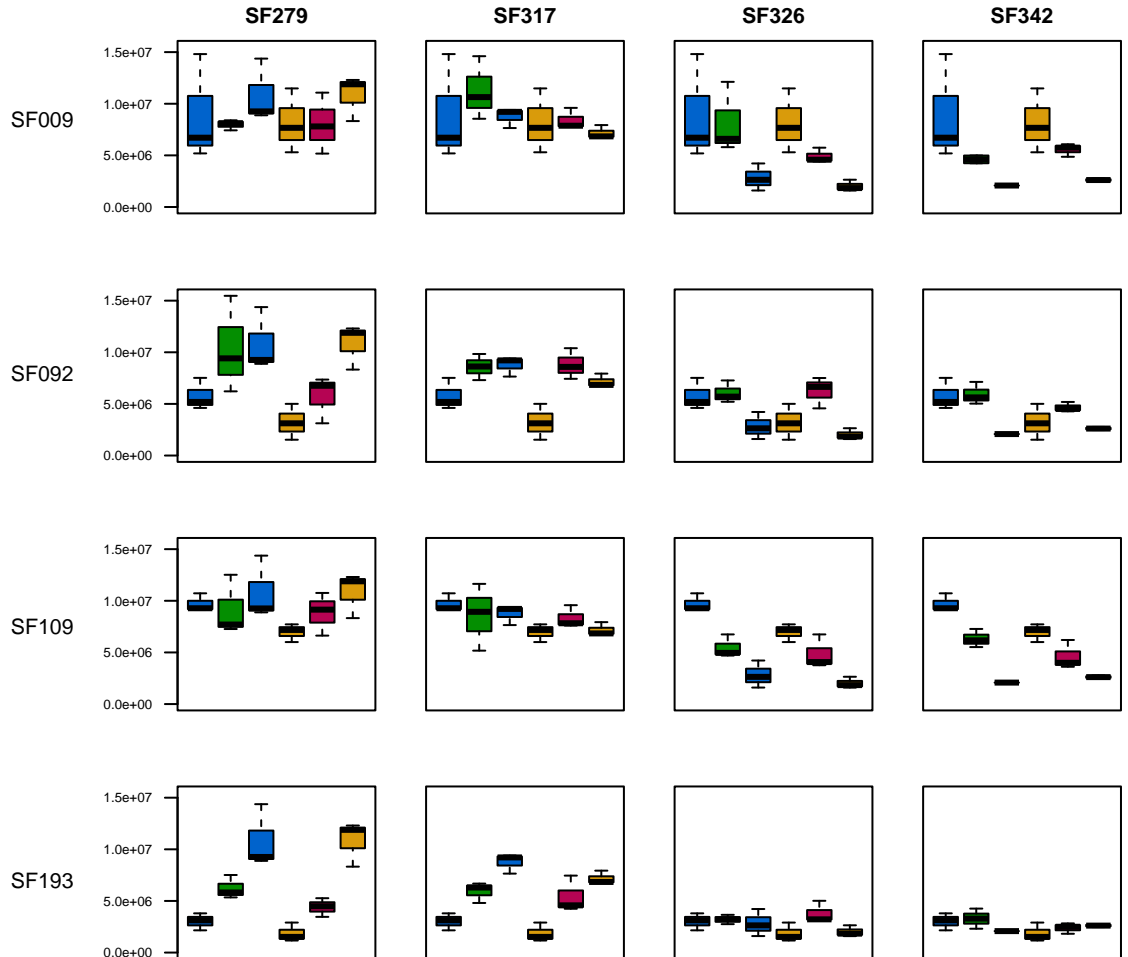

HanXRQChr05g0135591  
 Putative tubulin; Beta tubulin,  
 autoregulation binding site; Tubulin, C-term

Parents WW  
 Parents WD  
 Hybrids WW  
 Hybrids WD

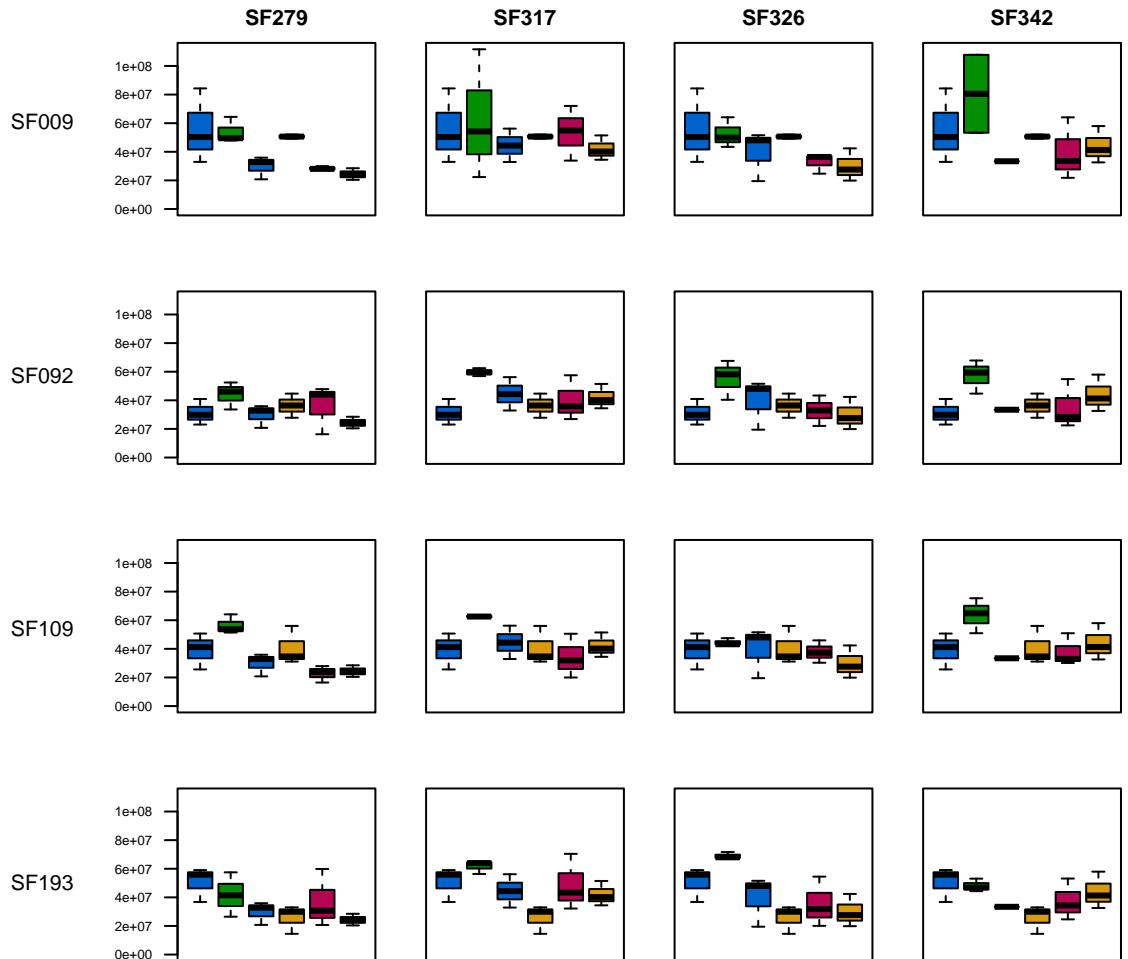

HanXRQChr08g0229261  
Putative grpE nucleotide exchange factor

- Parents WW
- Parents WD
- Hybrids WW
- Hybrids WD

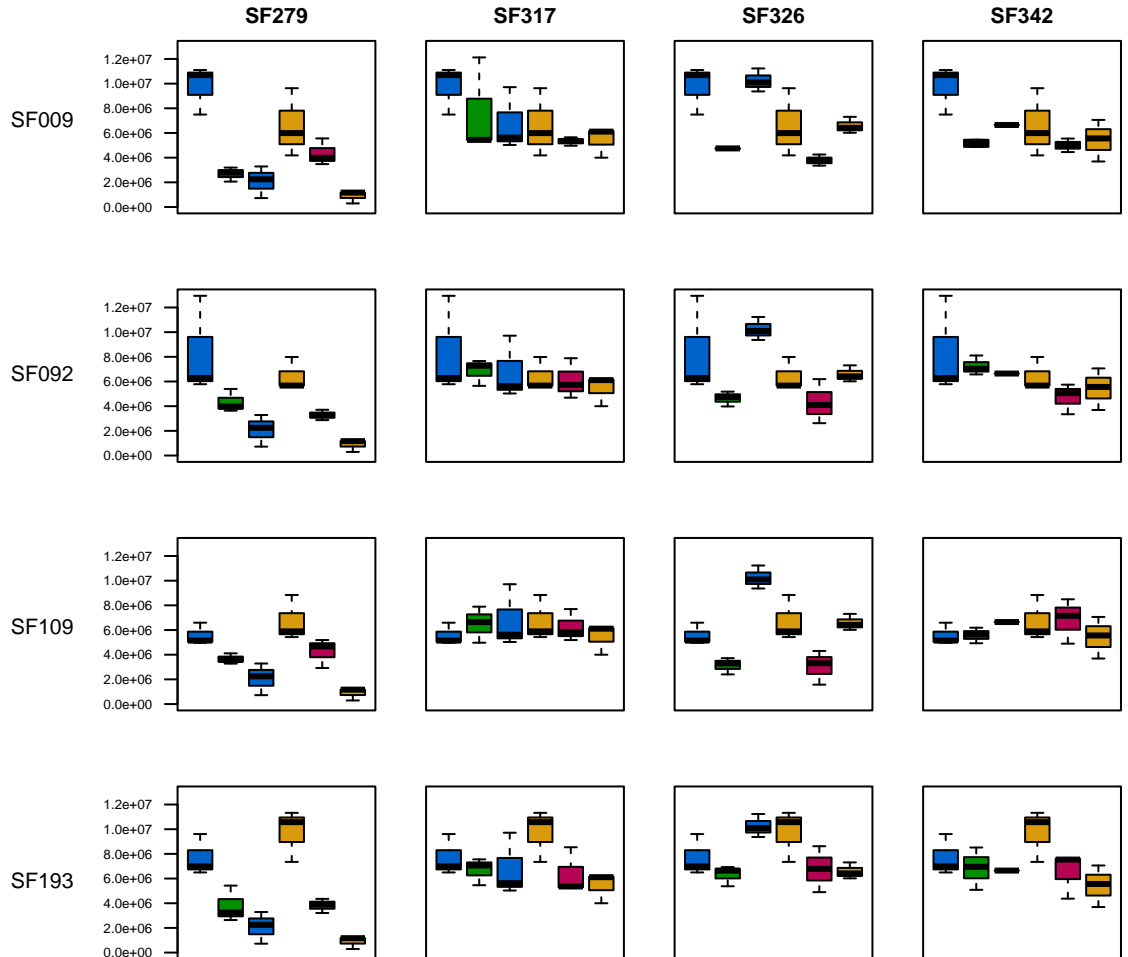

HanXRQChr15g0478311  
Probable LYR family of Fe/S cluster  
biogenesis protein

Parents WW  
Parents WD  
Hybrids WW  
Hybrids WD

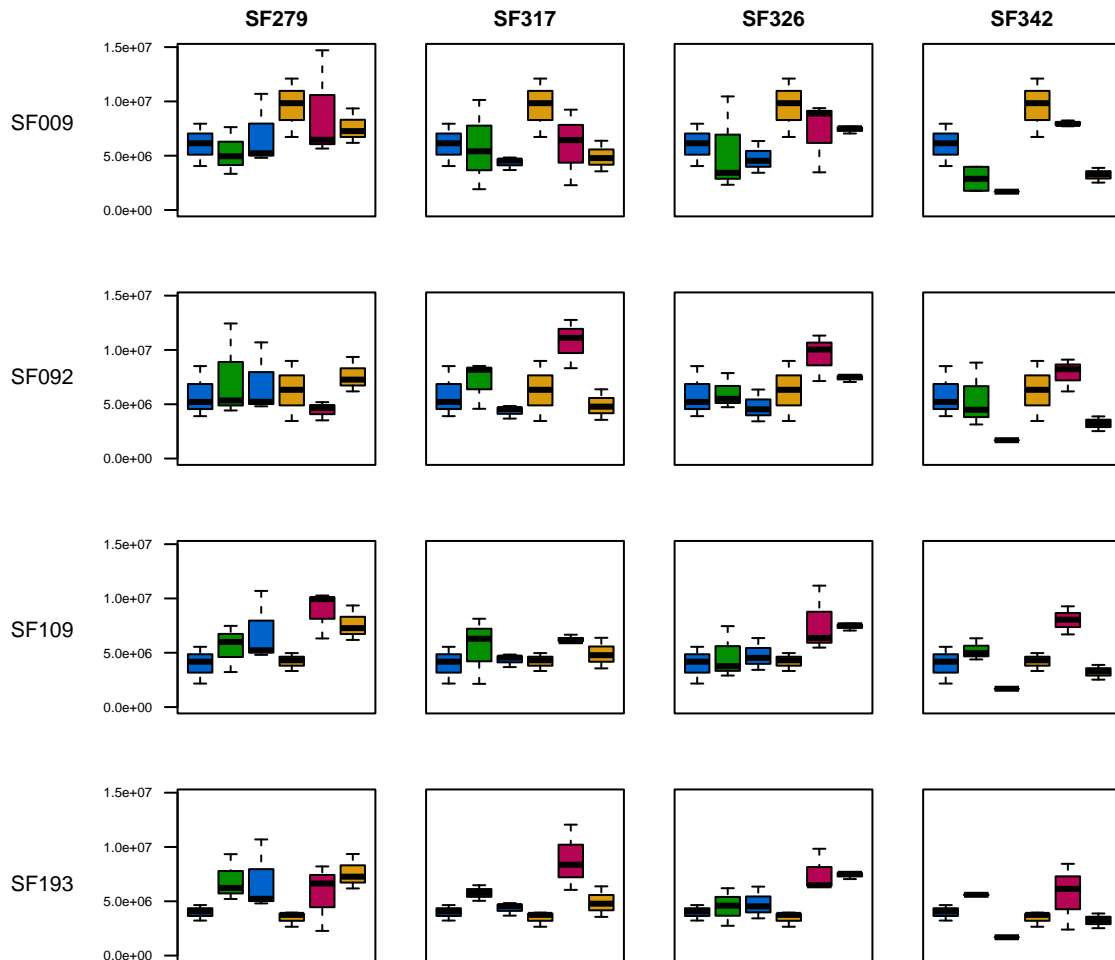

HanXRQChr03g0076151  
Probable flavodoxin-like quinone  
reductase 1

Parents WW  
Parents WD  
Hybrids WW  
Hybrids WD

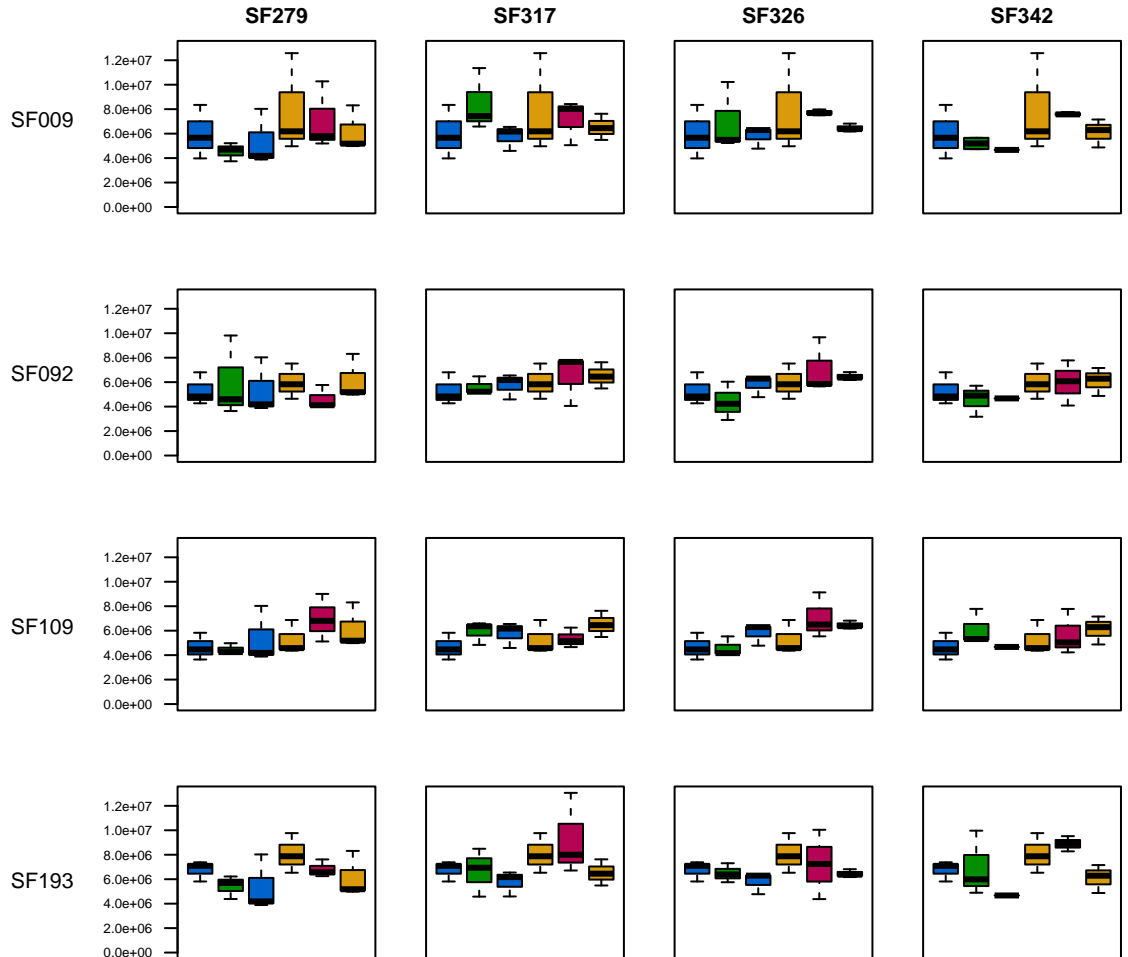

HanXRQChr09g0247401  
Putative mitogen-activated protein  
(MAP) kinase phosphatase; Immunoglobulin

Parents WW  
Parents WD  
Hybrids WW  
Hybrids WD

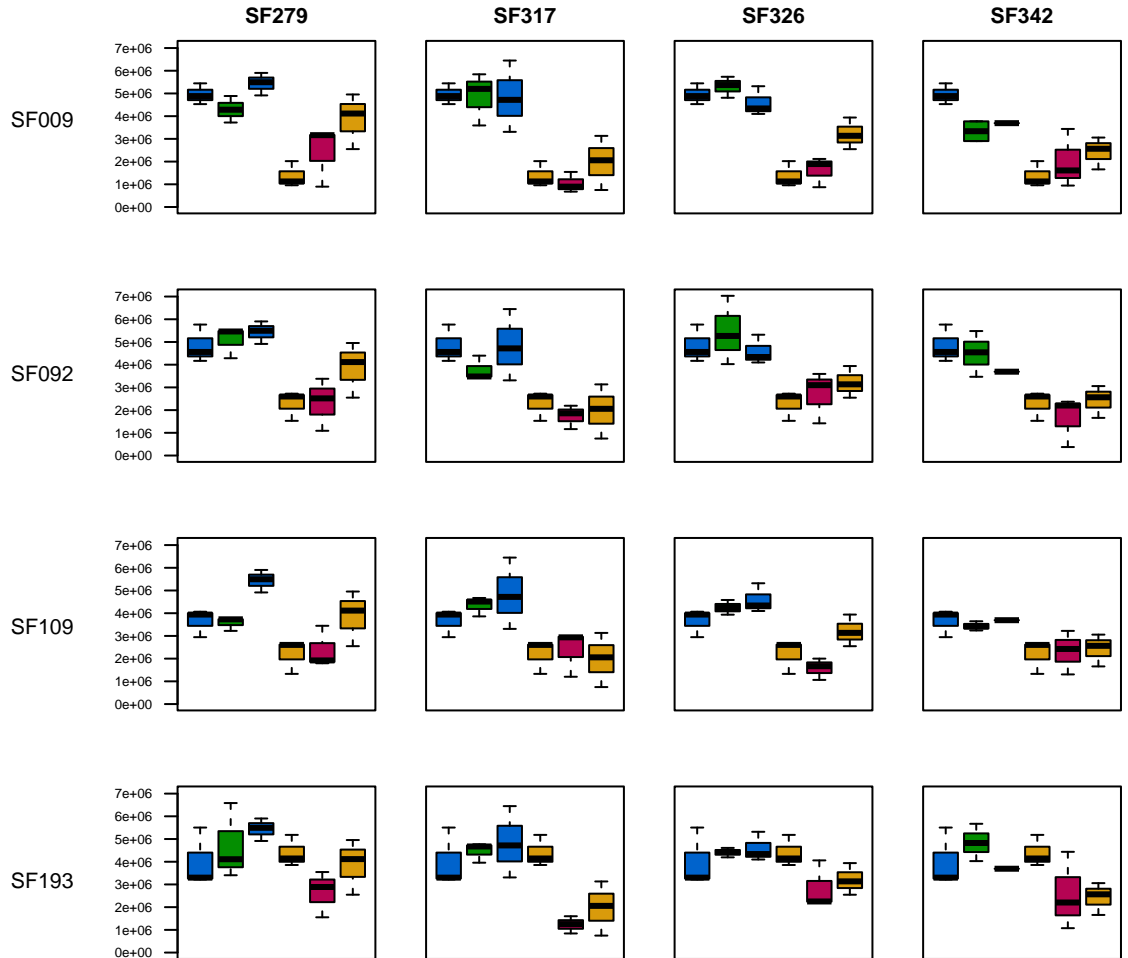

HanXRQChr05g0146351  
Probable SKU5 similar 5

Parents WW  
Parents WD  
Hybrids WW  
Hybrids WD

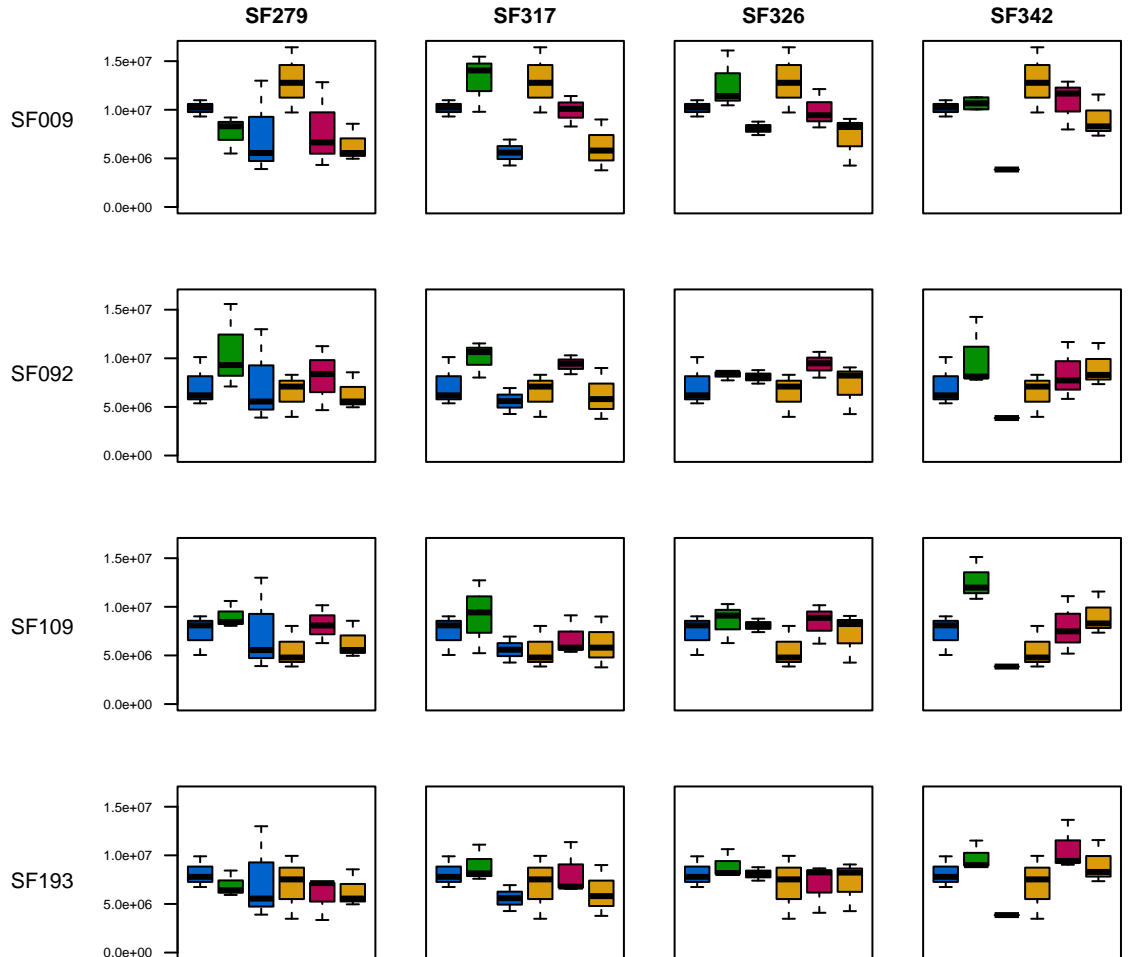



HanXRQChr06g0177411  
Probable uracil  
phosphoribosyltransferase

Parents WW  
Parents WD  
Hybrids WW  
Hybrids WD

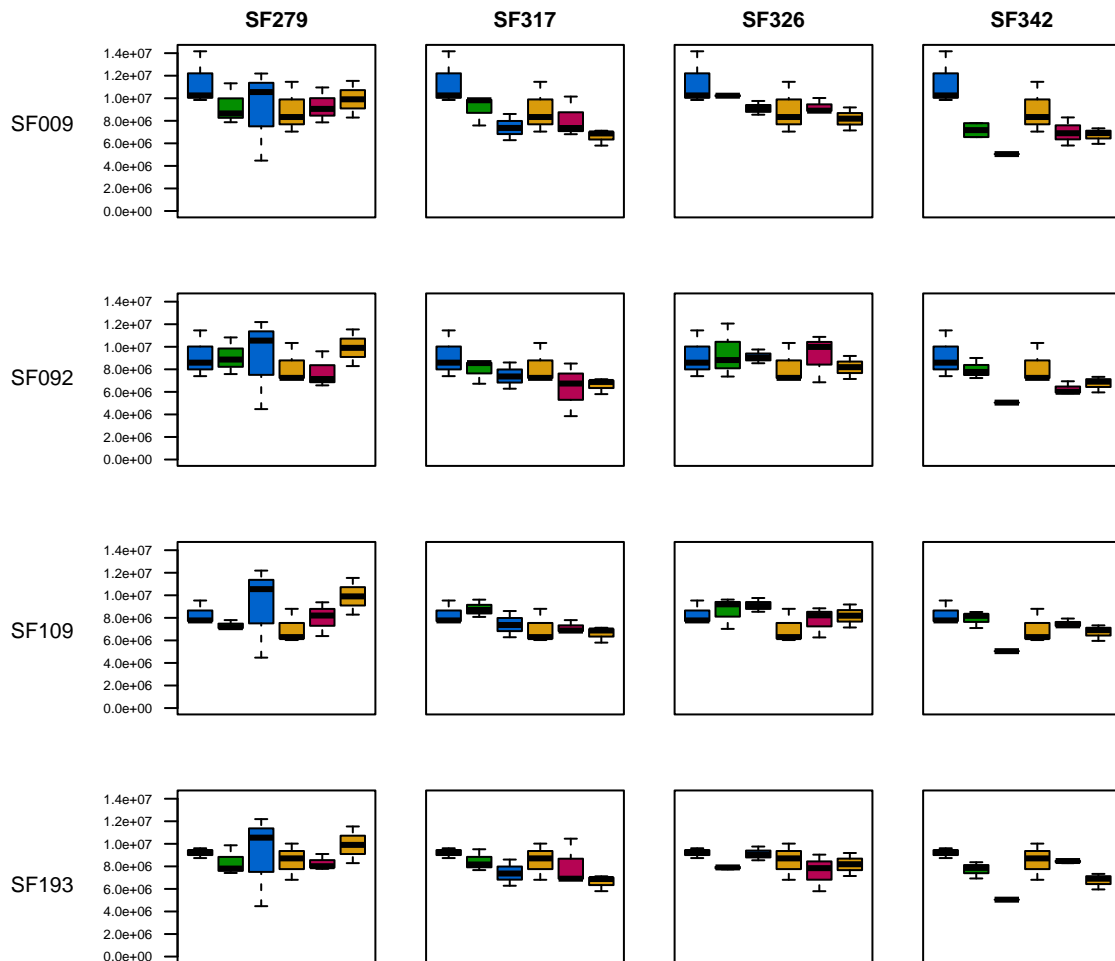

HanXRQChr05g0136751  
Probable xylose isomerase family protein

Parents WW  
Parents WD  
Hybrids WW  
Hybrids WD

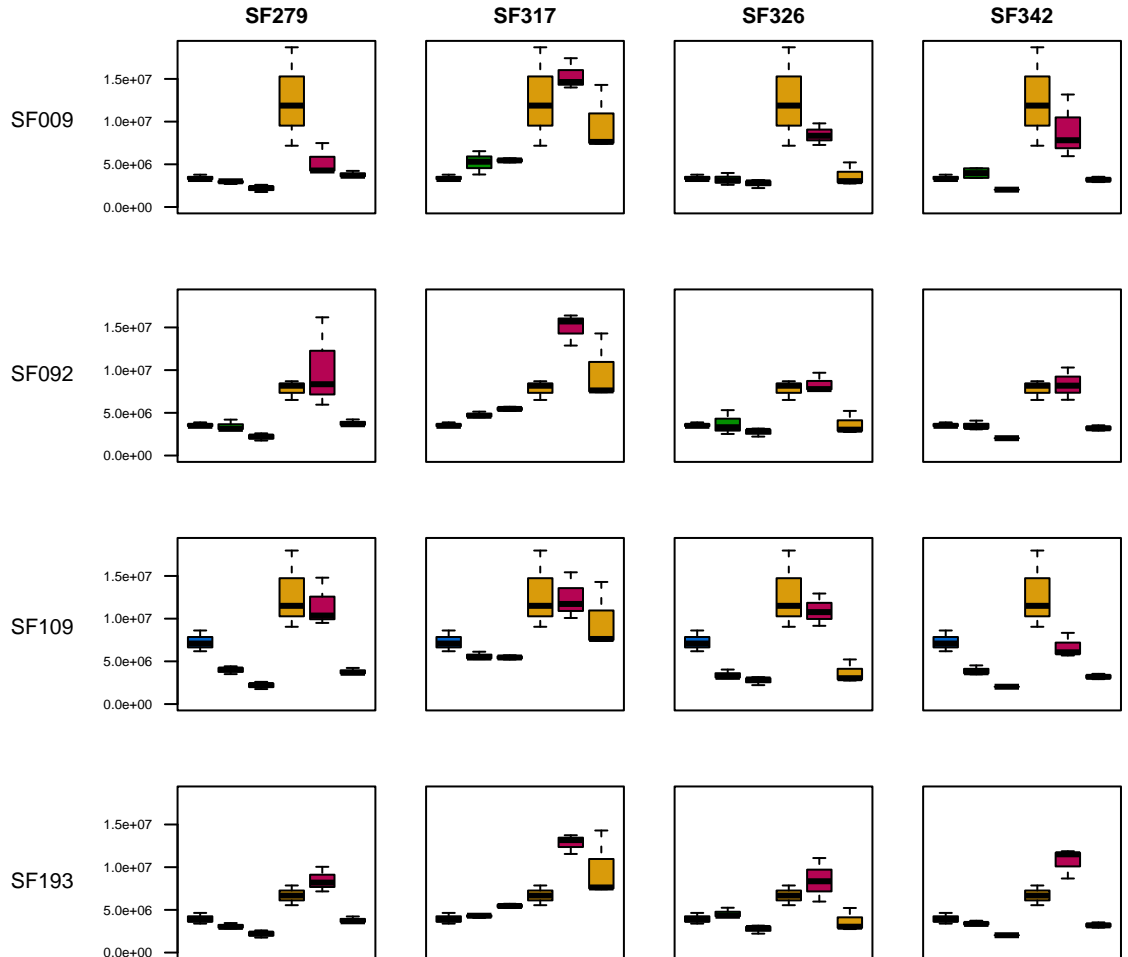

HanXRQChr08g0218231  
 Probable malate dehydrogenase [NADP],  
 chloroplastic

Parents WW  
 Parents WD  
 Hybrids WW  
 Hybrids WD

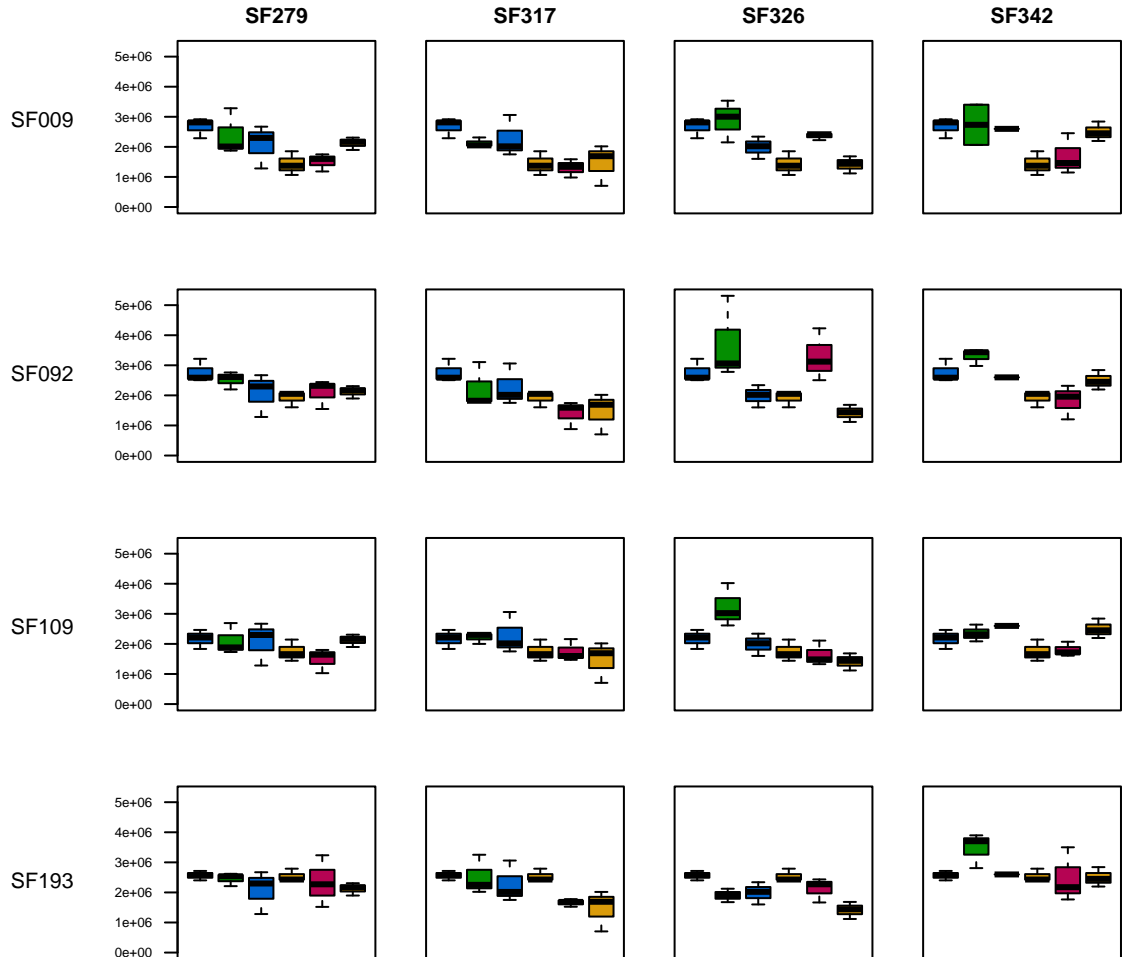

HanXRQChr09g0259871  
Putative CBS domain

- Parents WW
- Parents WD
- Hybrids WW
- Hybrids WD

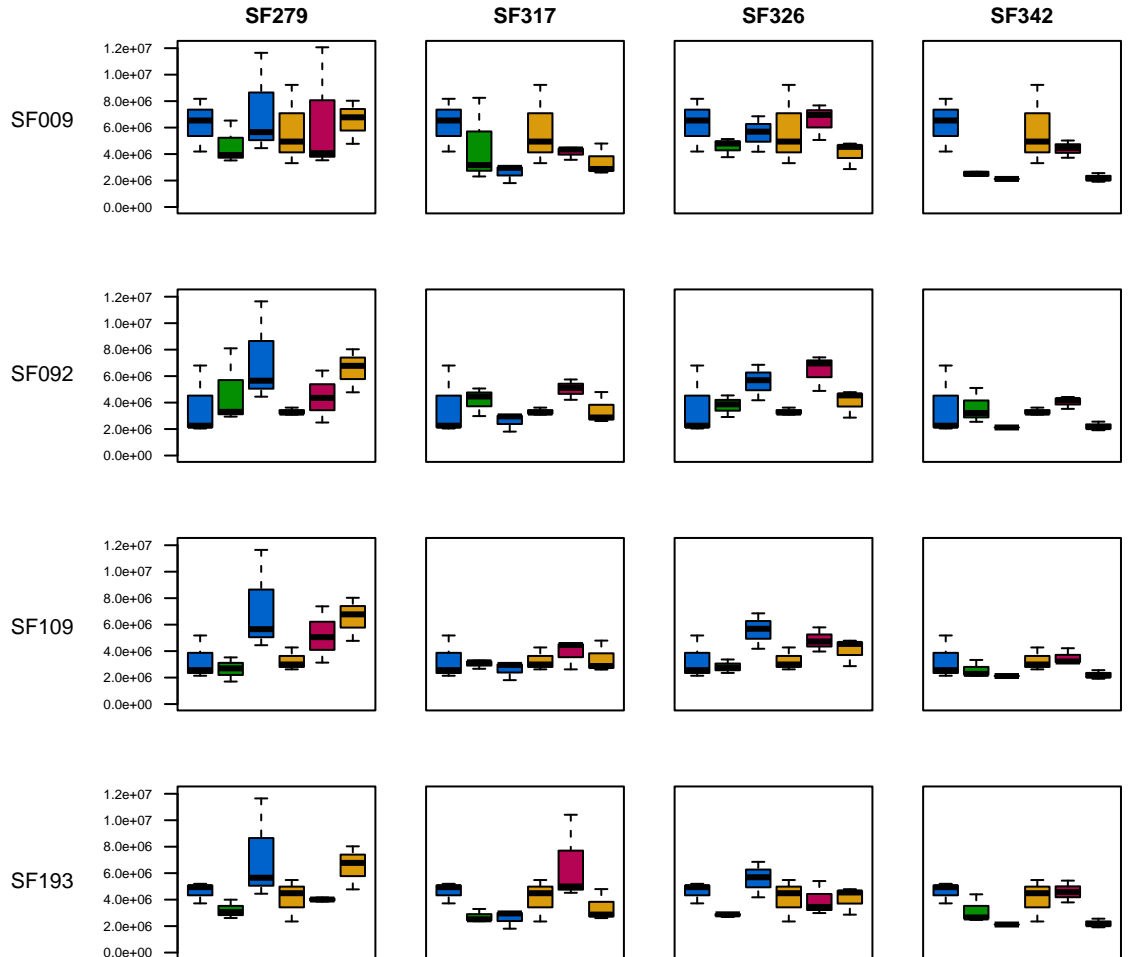

HanXRQChr16g0532261  
Probable UTP--glucose-1-phosphate  
uridylyltransferase

Parents WW  
Parents WD  
Hybrids WW  
Hybrids WD

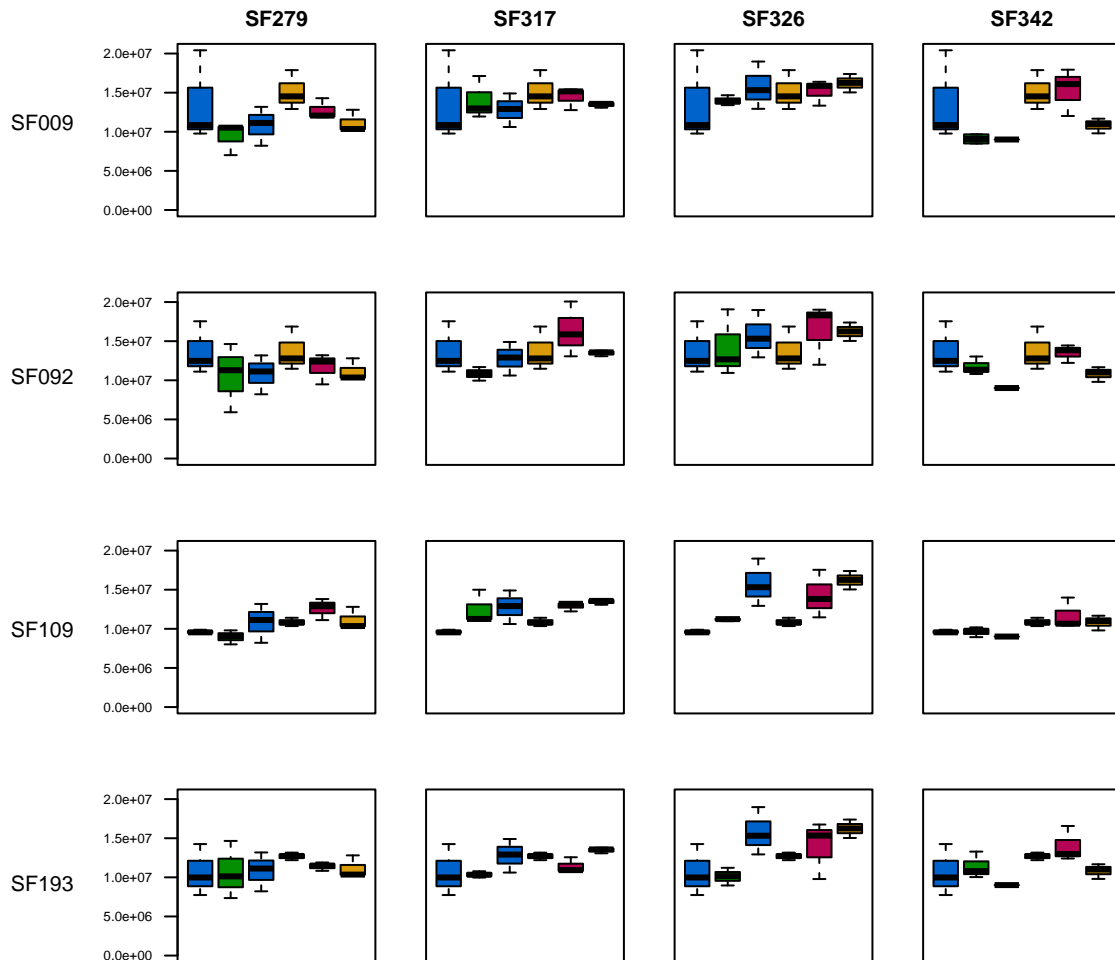

HanXRQChr17g0559241  
 Probable glyceraldehyde-3-phosphate  
 dehydrogenase A, chloroplastic

Parents WW  
 Parents WD  
 Hybrids WW  
 Hybrids WD

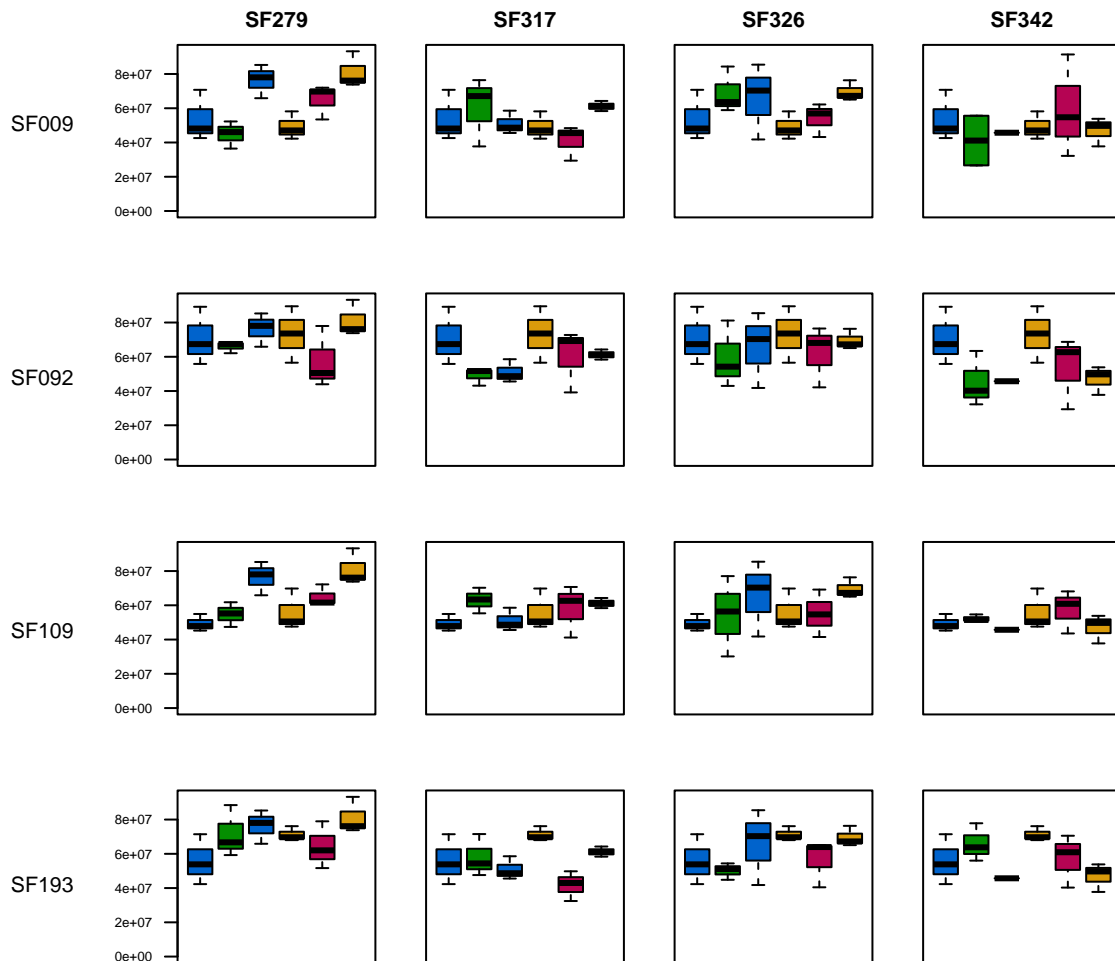

HanXRQChr03g0061451  
Putative glyoxalase I;  
Glyoxalase/Bleomycin resistance protein/Di

Parents WW  
Parents WD  
Hybrids WW  
Hybrids WD

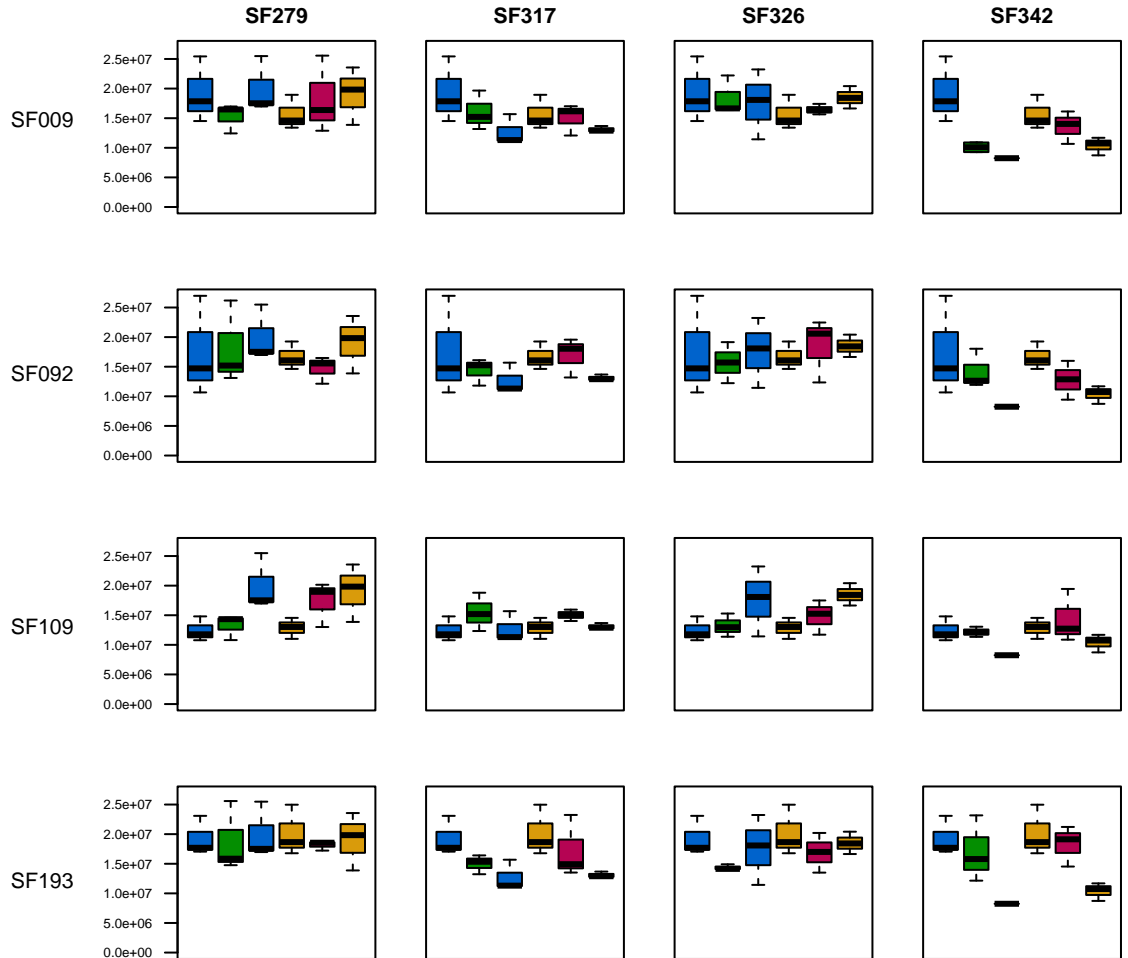

HanXRQChr09g0269011  
Probable gamma carbonic anhydrase 1

- Parents WW
- Parents WD
- Hybrids WW
- Hybrids WD

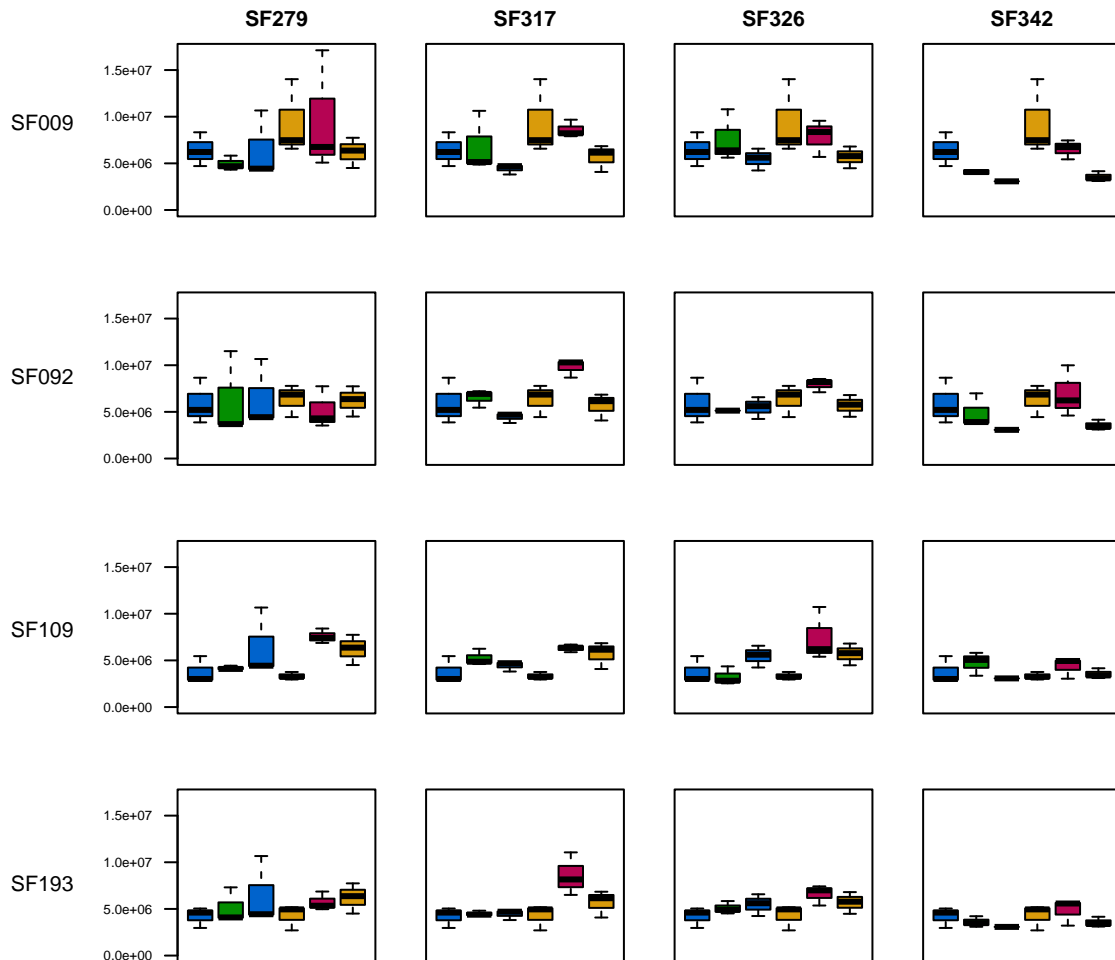



HanXRQChr06g0165121  
 Probable glucose-methanol-choline (GMC)  
 oxidoreductase family protein

Parents WW  
 Parents WD  
 Hybrids WW  
 Hybrids WD

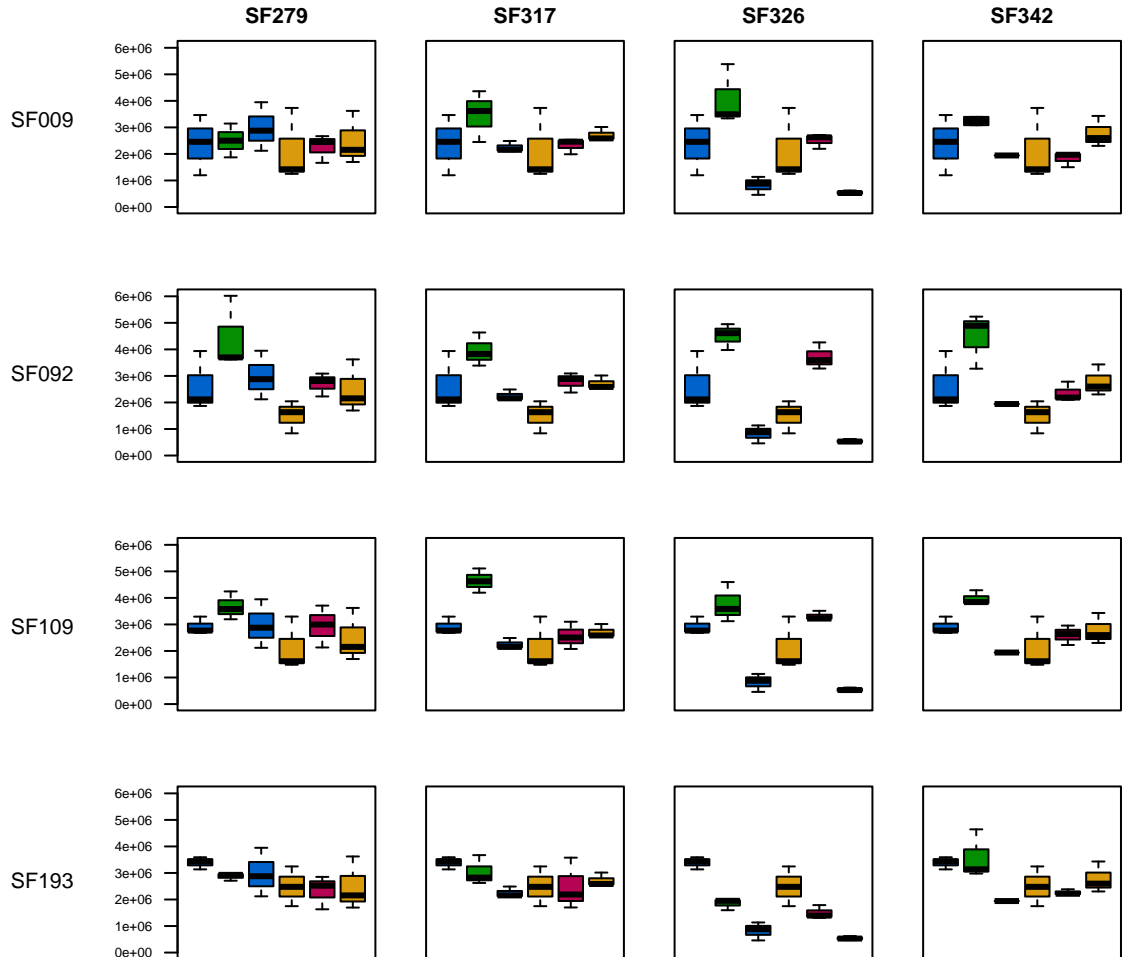

HanXRQChr01g0017481  
 Probable NAD-dependent malic enzyme 6:  
 kDa isoform, mitochondrial

Parents WW  
 Parents WD  
 Hybrids WW  
 Hybrids WD

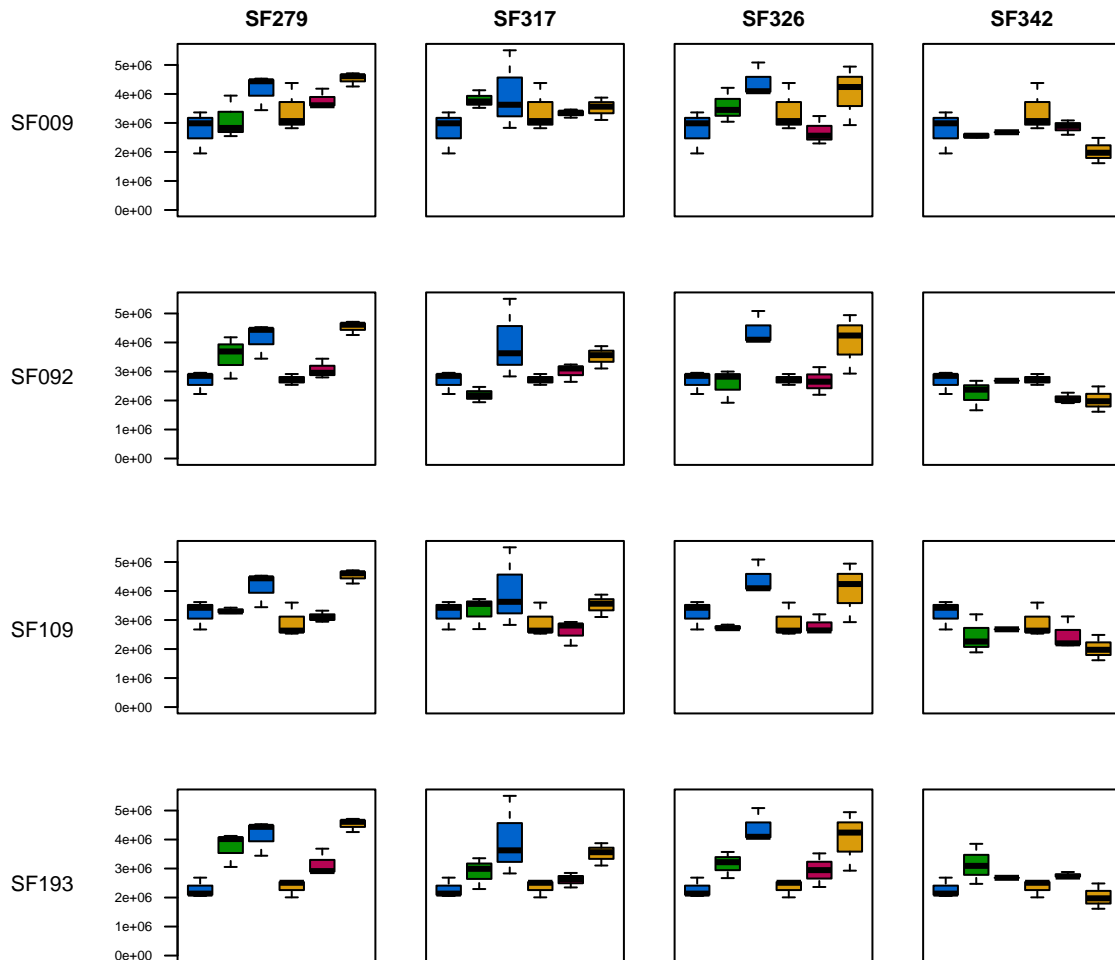

HanXRQChr12g0383501  
Putative carbonic anhydrase

Parents WW  
Parents WD  
Hybrids WW  
Hybrids WD

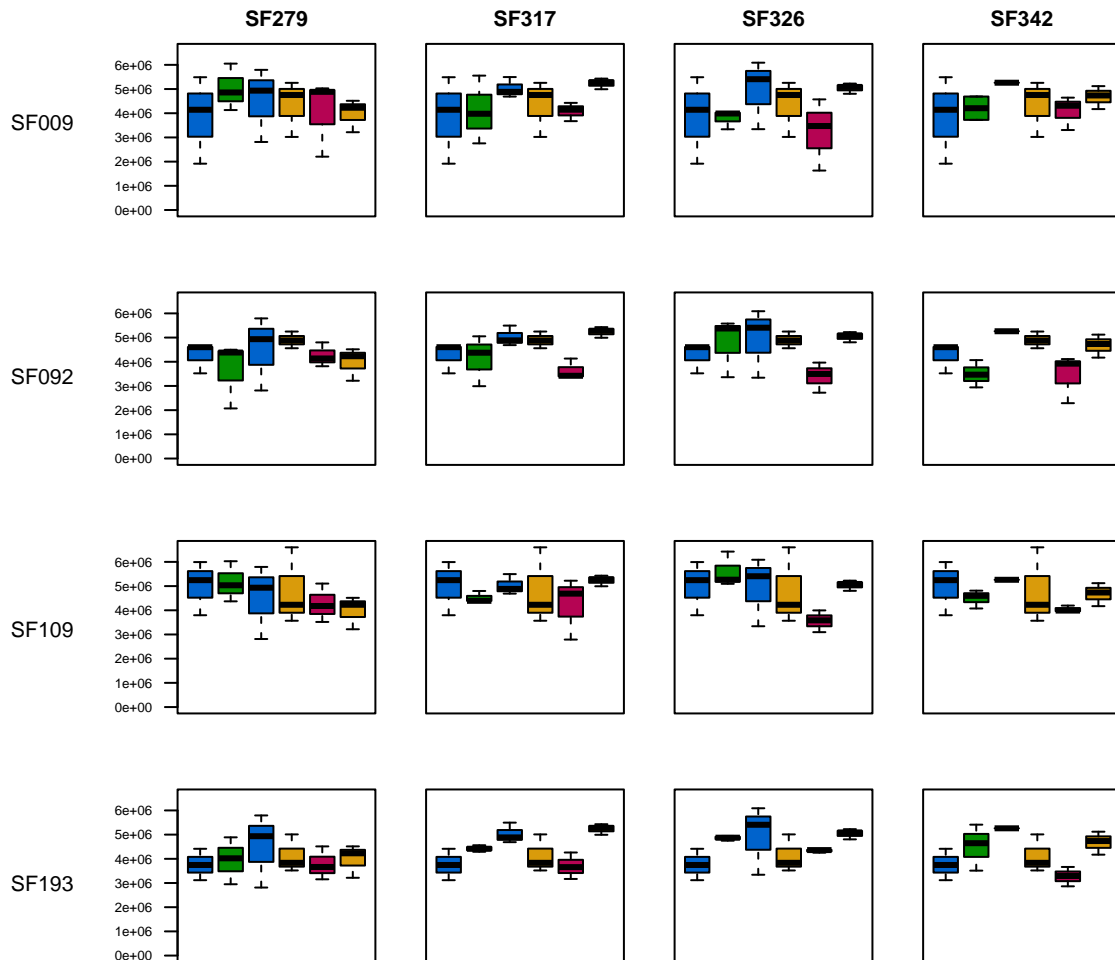

HanXRQChr09g0260211  
Probable aspartate aminotransferase

- Parents WW
- Parents WD
- Hybrids WW
- Hybrids WD

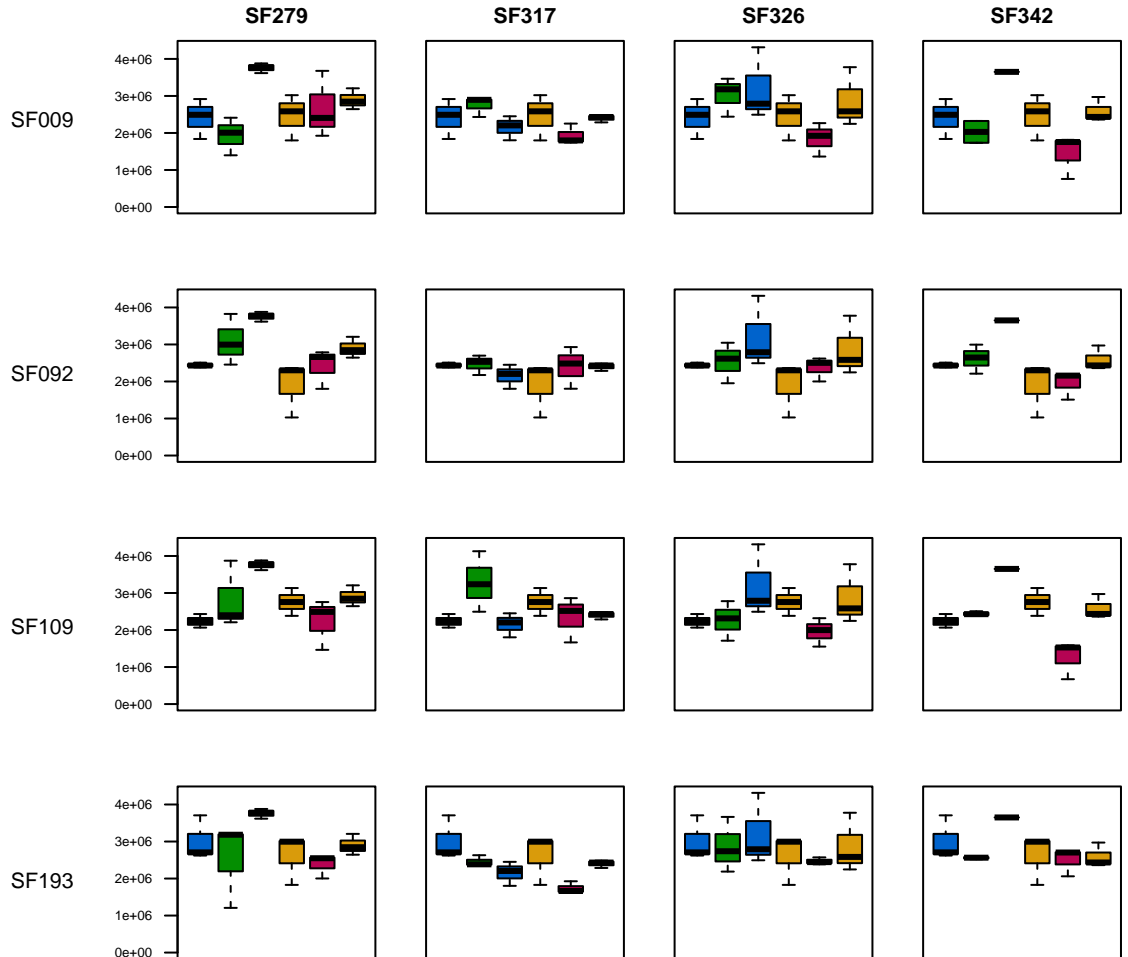

HanXRQChr15g0478461  
 Probable pyruvate kinase, cytosolic  
 isozyme

Parents WW  
 Parents WD  
 Hybrids WW  
 Hybrids WD

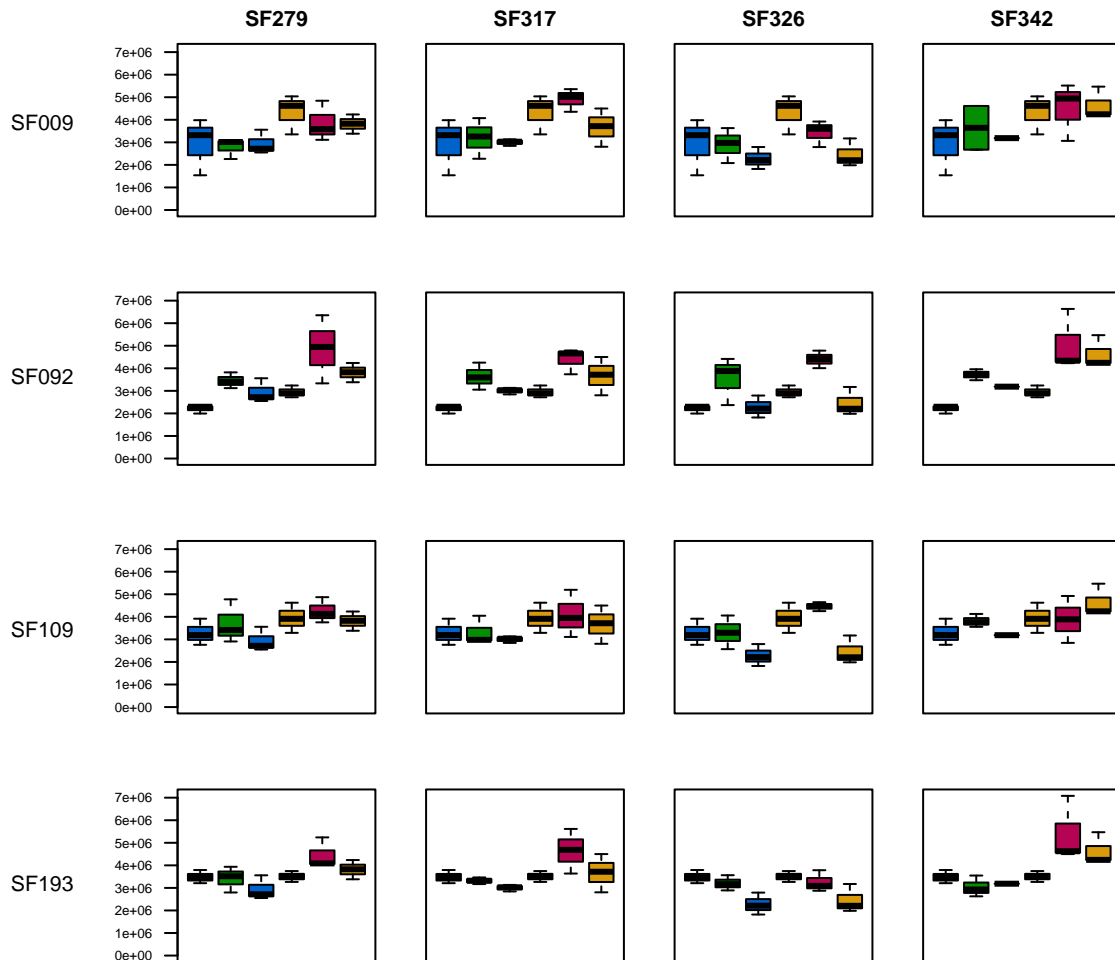

HanXRQChr16g0502461  
Putative nucleotide-binding alpha-beta  
plait domain

Parents WW  
Parents WD  
Hybrids WW  
Hybrids WD

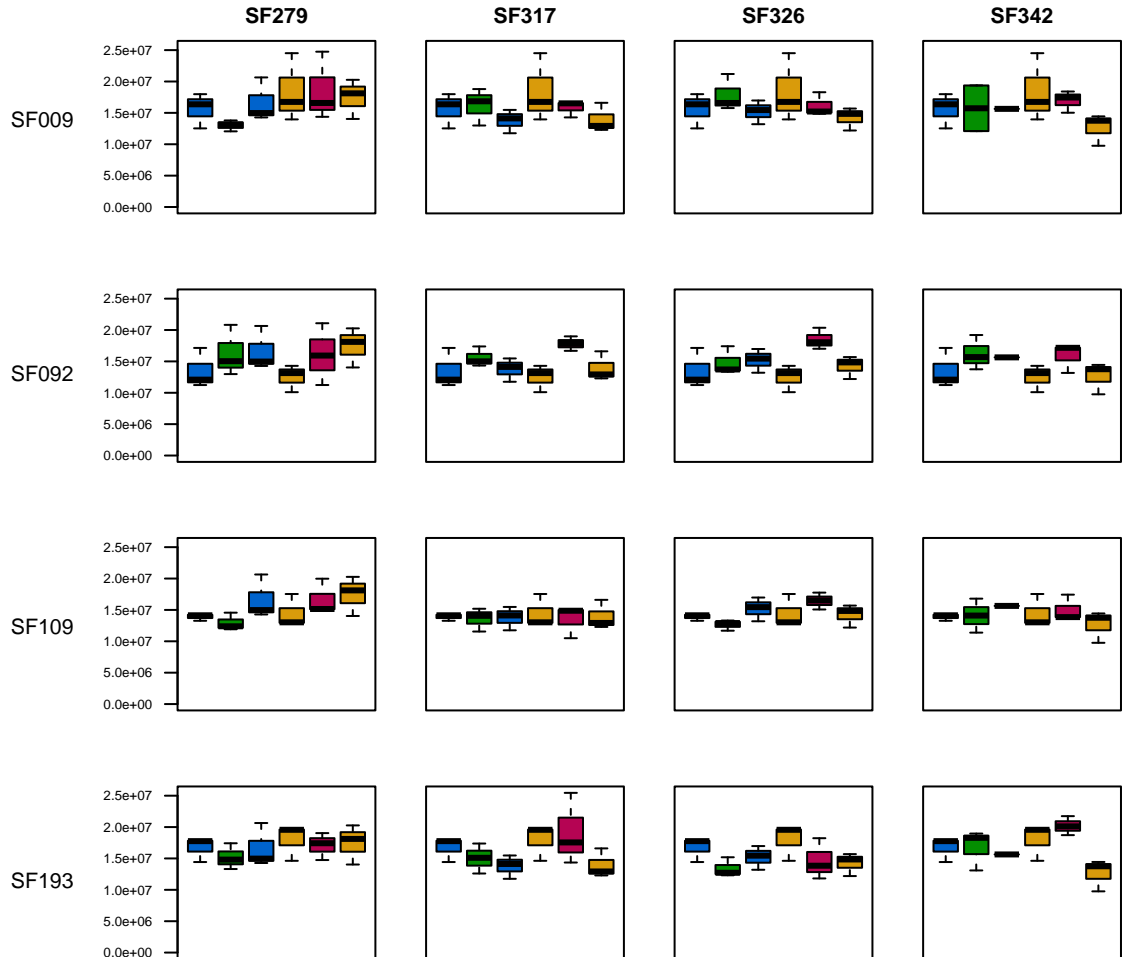

HanXRQChr08g0229101  
 Putative winged helix–turn–helix  
 DNA-binding domain; Eukaryotic translation

■ Parents WW  
 ■ Parents WD  
 ■ Hybrids WW  
 ■ Hybrids WD

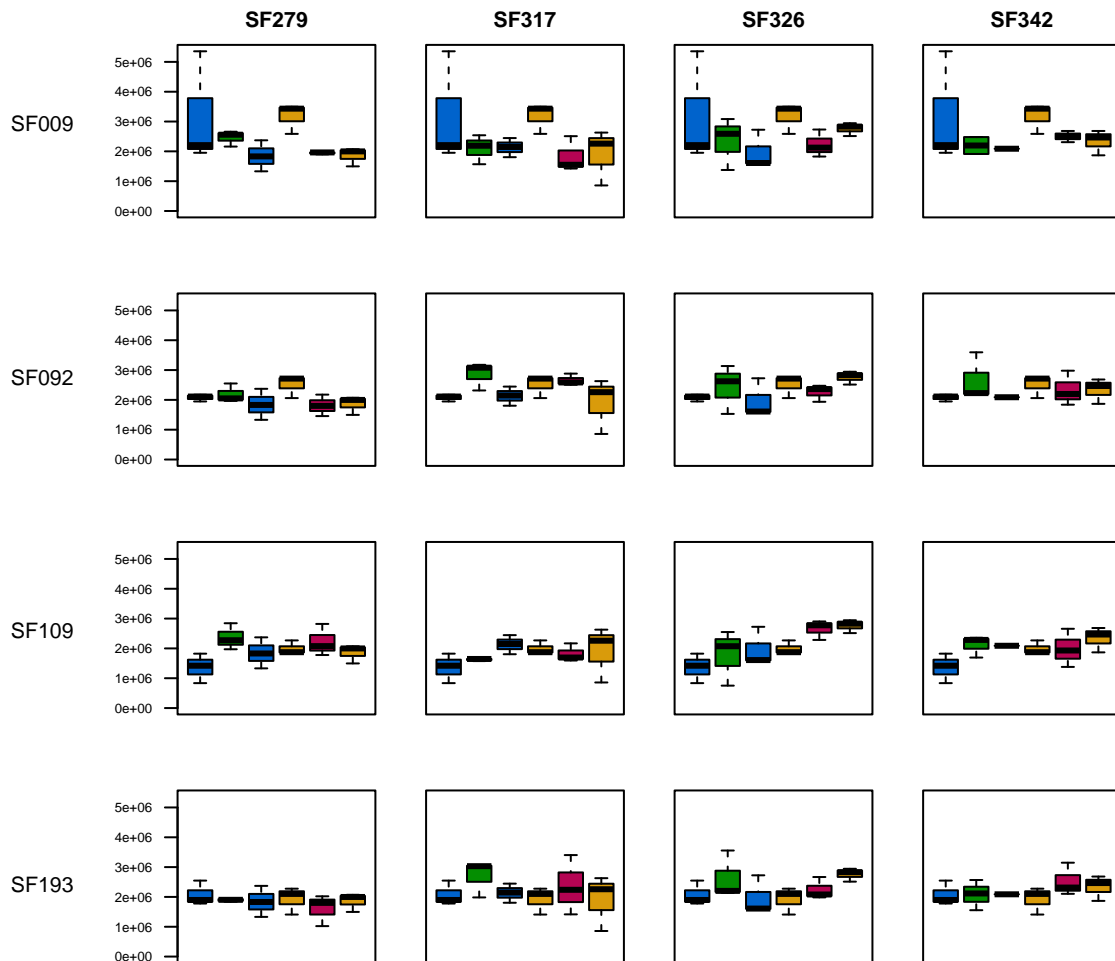

HanXRQChr10g0305701  
Probable SOUL heme-binding family  
protein

Parents WW  
Parents WD  
Hybrids WW  
Hybrids WD

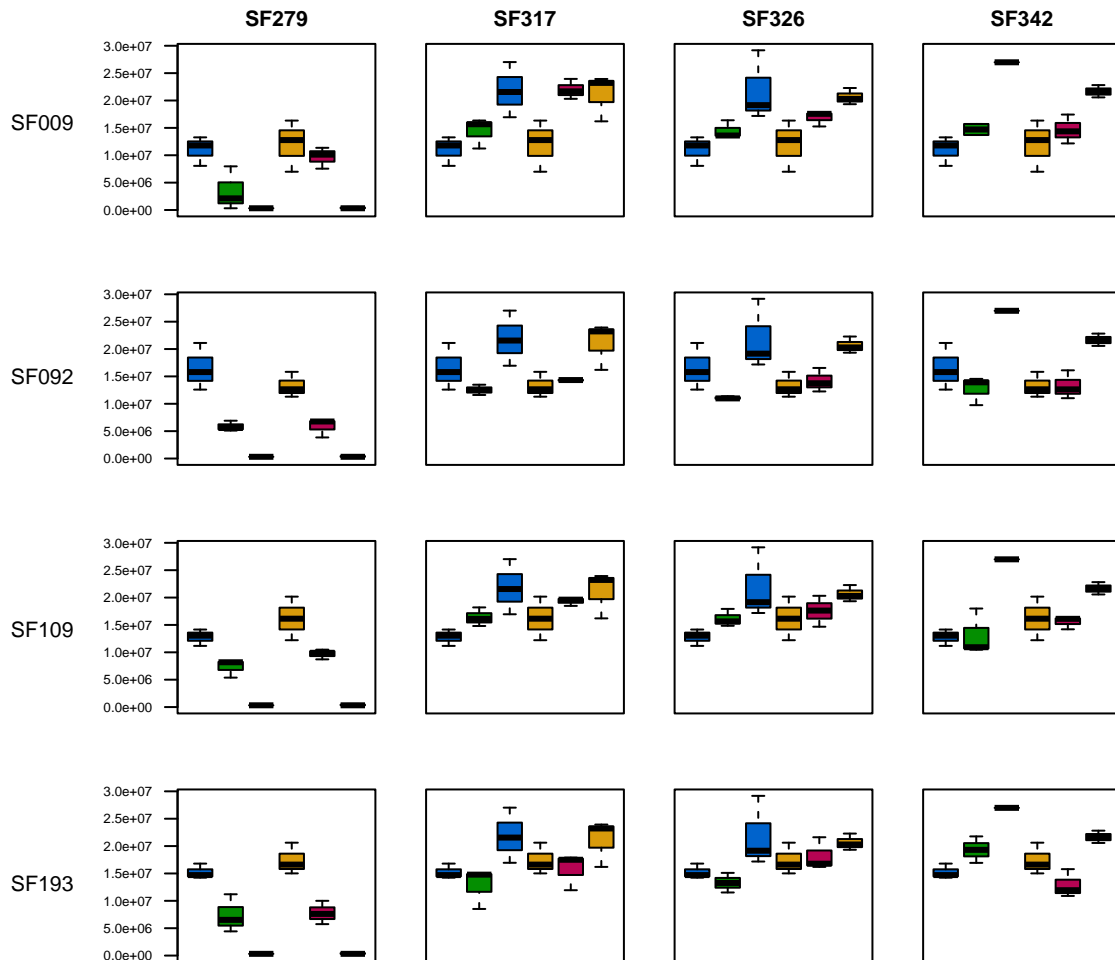



HanXRQChr17g0557051  
Probable FASCICLIN-like arabinogalactan  
protein 8

Parents WW  
Parents WD  
Hybrids WW  
Hybrids WD

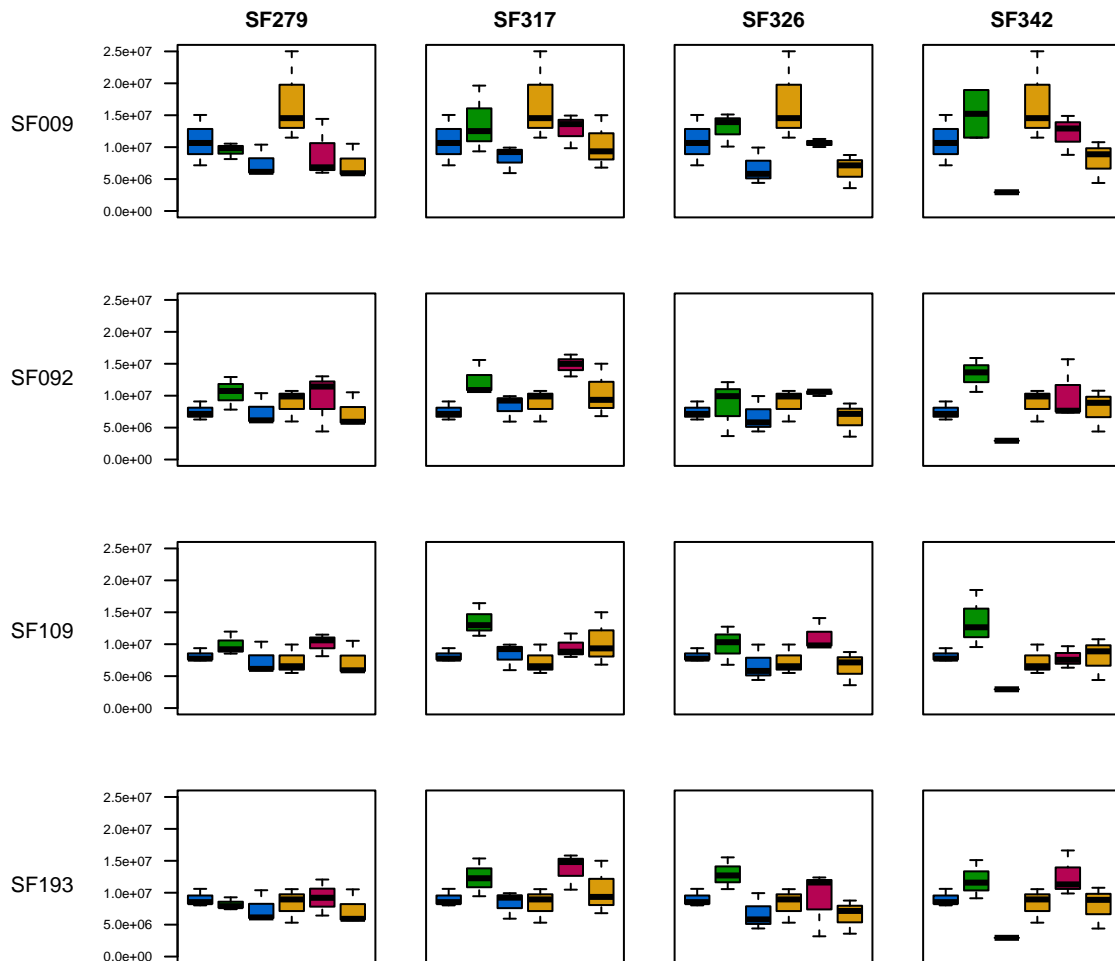

HanXRQChr03g0064921  
 Probable leucine aminopeptidase 2,  
 chloroplastic EC=3.4.11.5

Parents WW  
 Parents WD  
 Hybrids WW  
 Hybrids WD

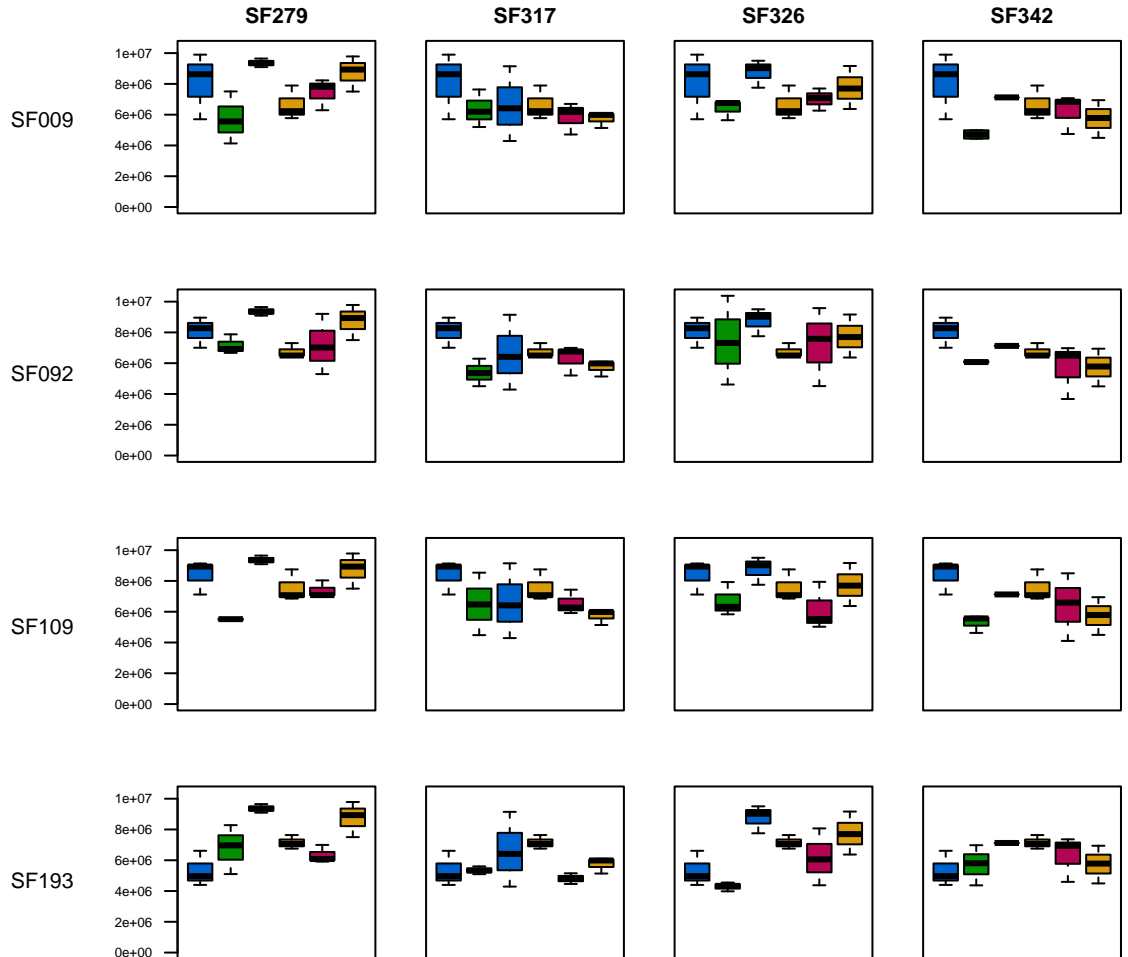

HanXRQChr04g0127521  
Putative cytochrome b6/f complex,  
subunit IV; Di-haem cytochrome, transmem

Parents WW  
Parents WD  
Hybrids WW  
Hybrids WD

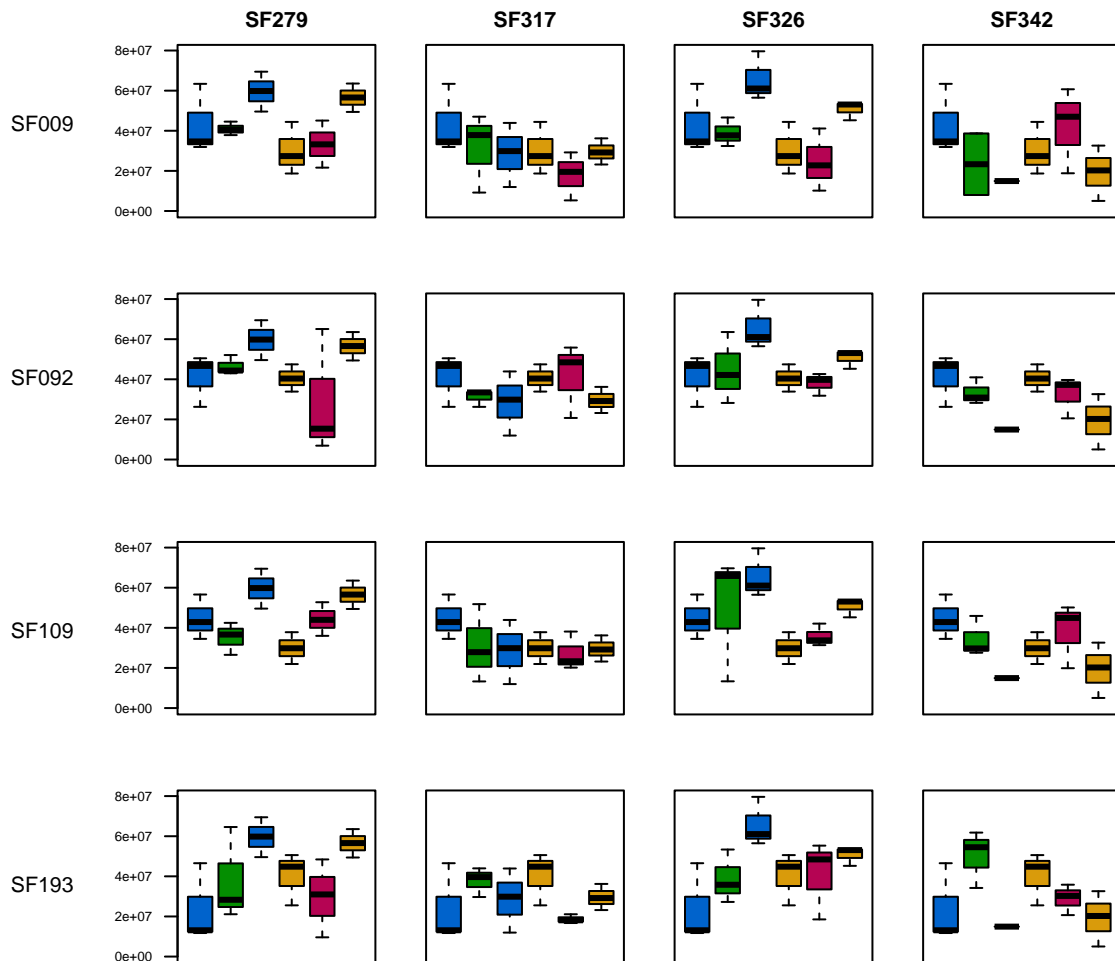

HanXRQChr03g0080571  
Putative pyruvate, phosphate dikinase

Parents WW  
Parents WD  
Hybrids WW  
Hybrids WD

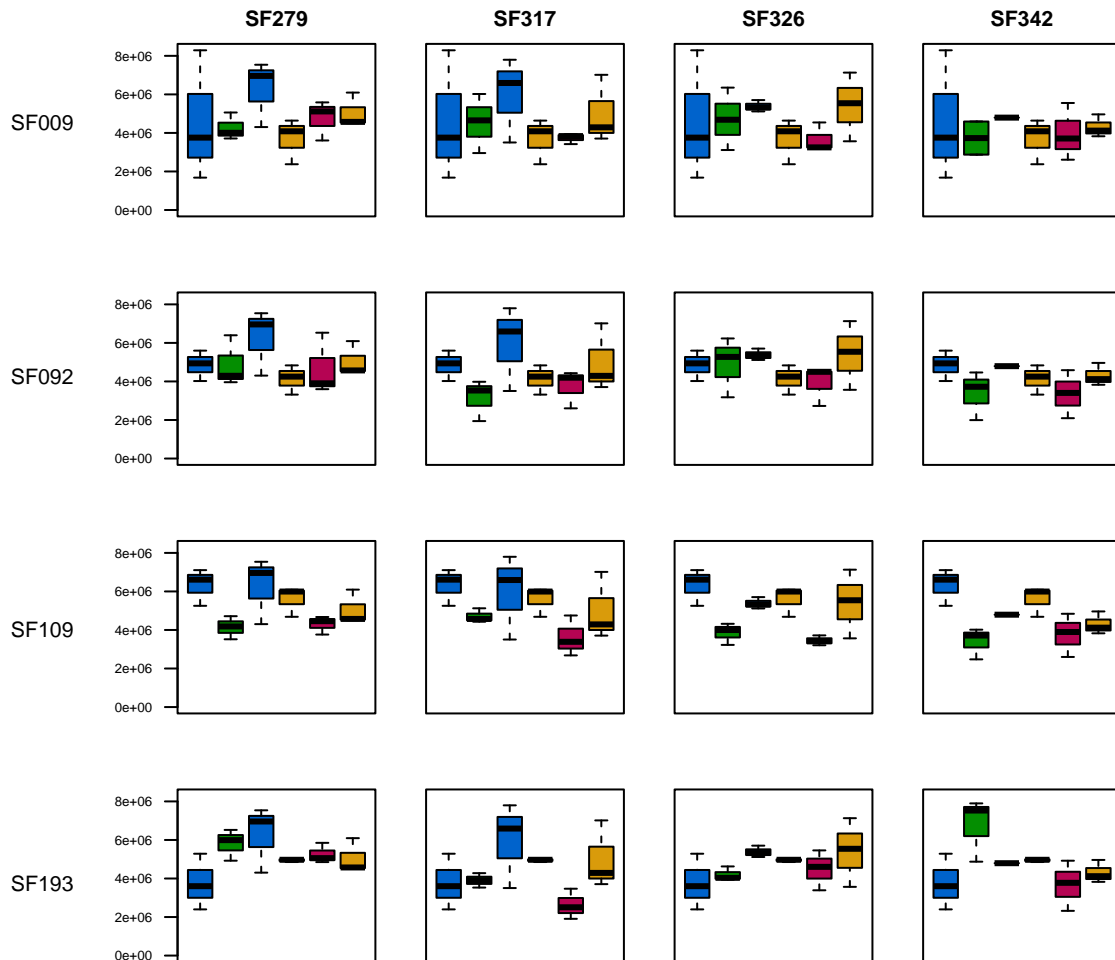

HanXRQChr12g0359711  
Probable V-type proton ATPase catalytic  
subunit A

Parents WW  
Parents WD  
Hybrids WW  
Hybrids WD

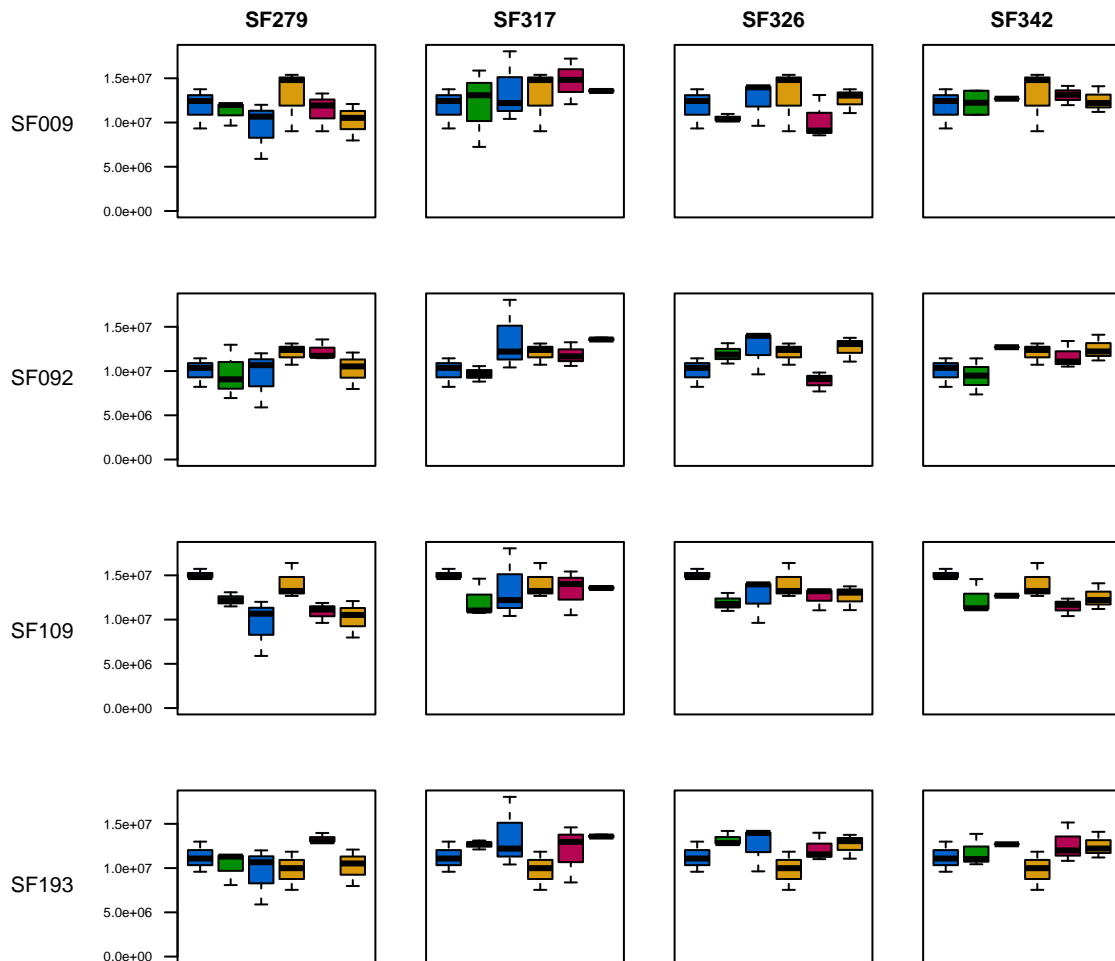

HanXRQChr14g0458931  
Uncharacterized conserved protein

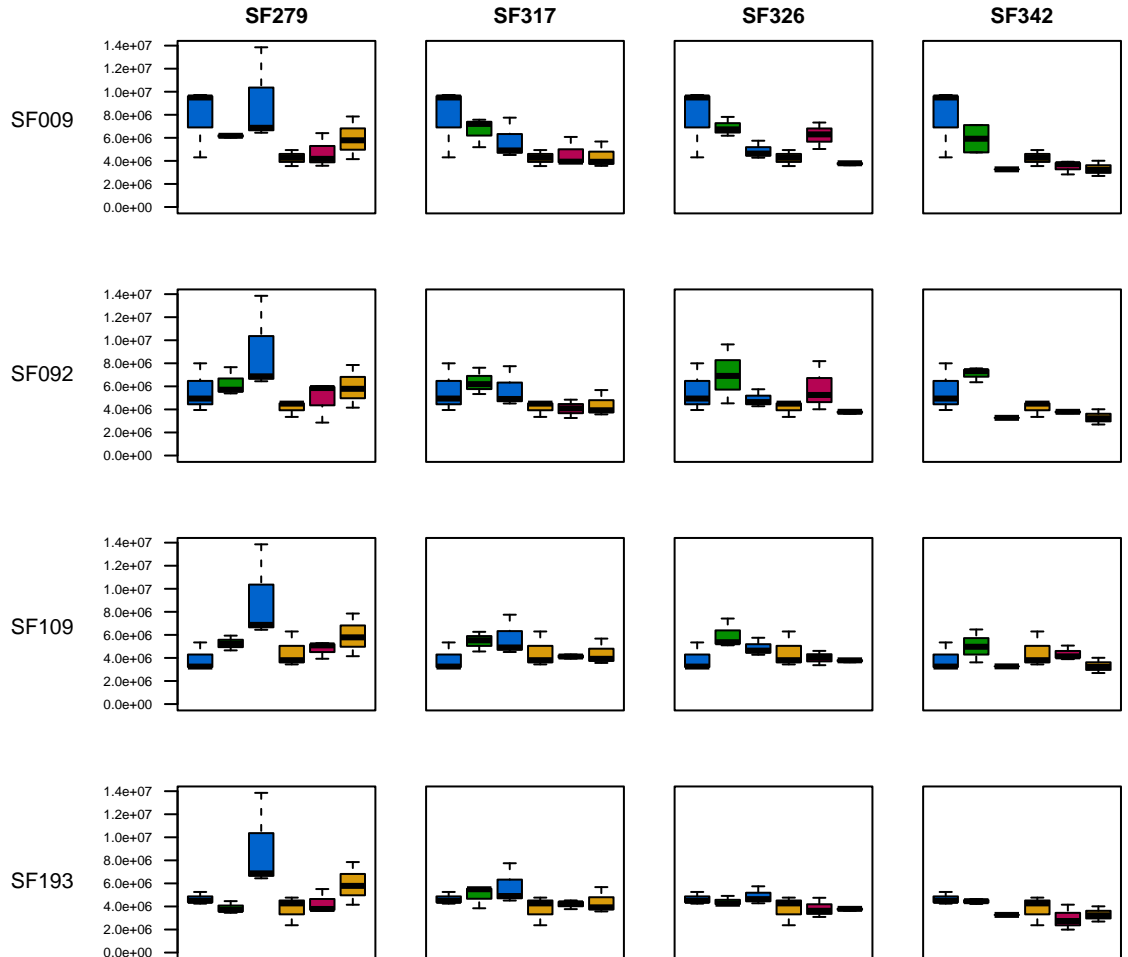

HanXRQChr10g0303971  
Probable ribosomal protein L14

Parents WW  
Parents WD  
Hybrids WW  
Hybrids WD

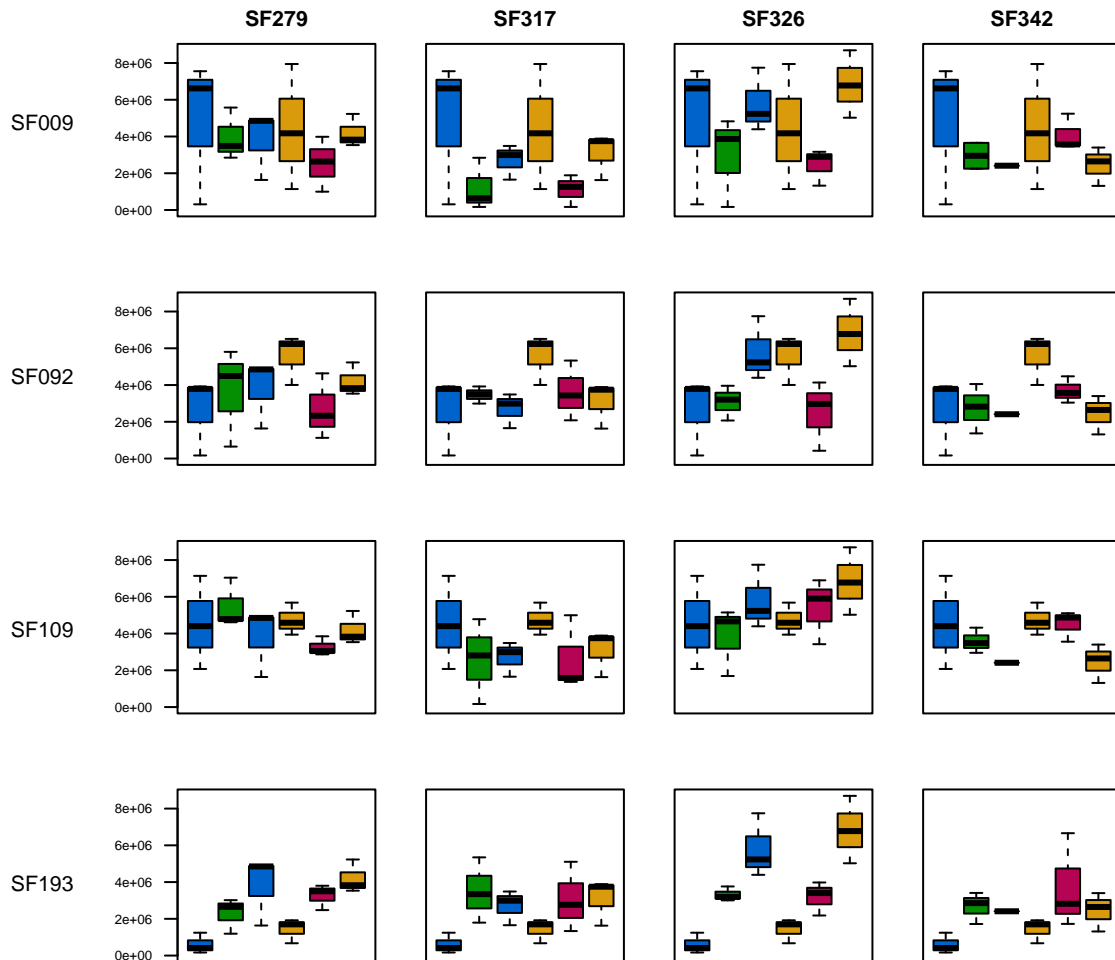

HanXRQChr16g0500661  
Probable thioredoxin superfamily protein

Parents WW  
Parents WD  
Hybrids WW  
Hybrids WD

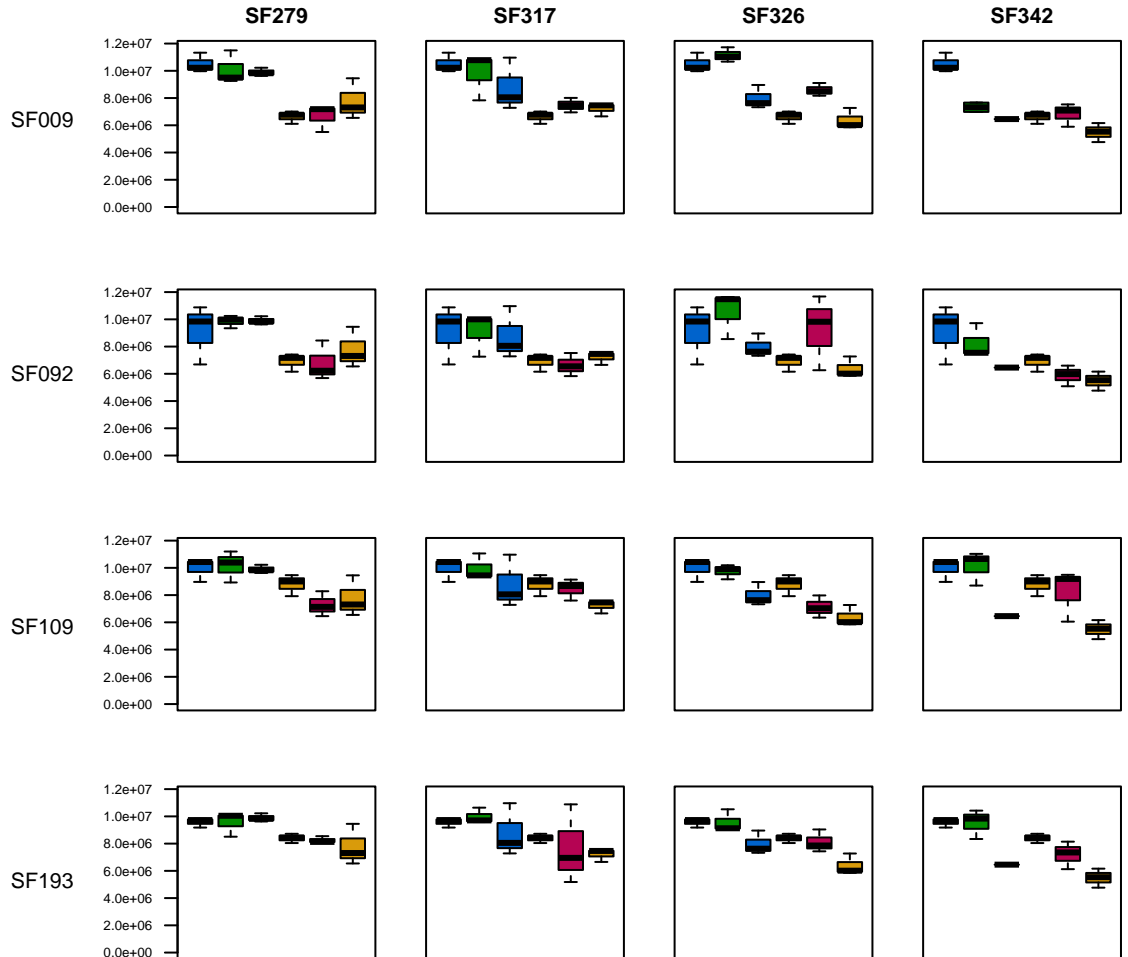



HanXRQChr10g0319481  
 Putative RNA helicase HrpA; DEAD/DEAH  
 box helicase domain; RNA helicase, DEAD-

Parents WW  
 Parents WD  
 Hybrids WW  
 Hybrids WD

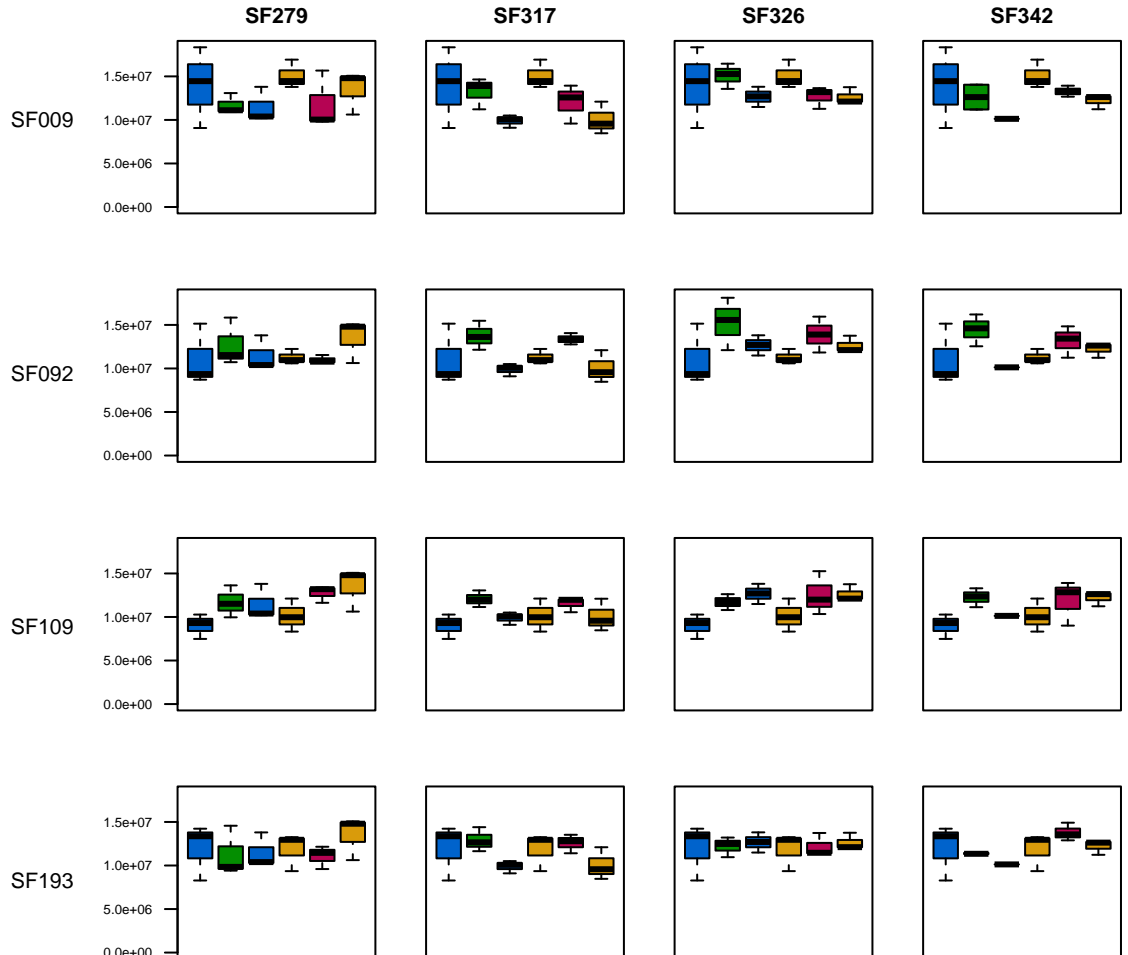

HanXRQChr01g0000121  
Putative translation elongation factor  
P/YeiP

Parents WW  
Parents WD  
Hybrids WW  
Hybrids WD

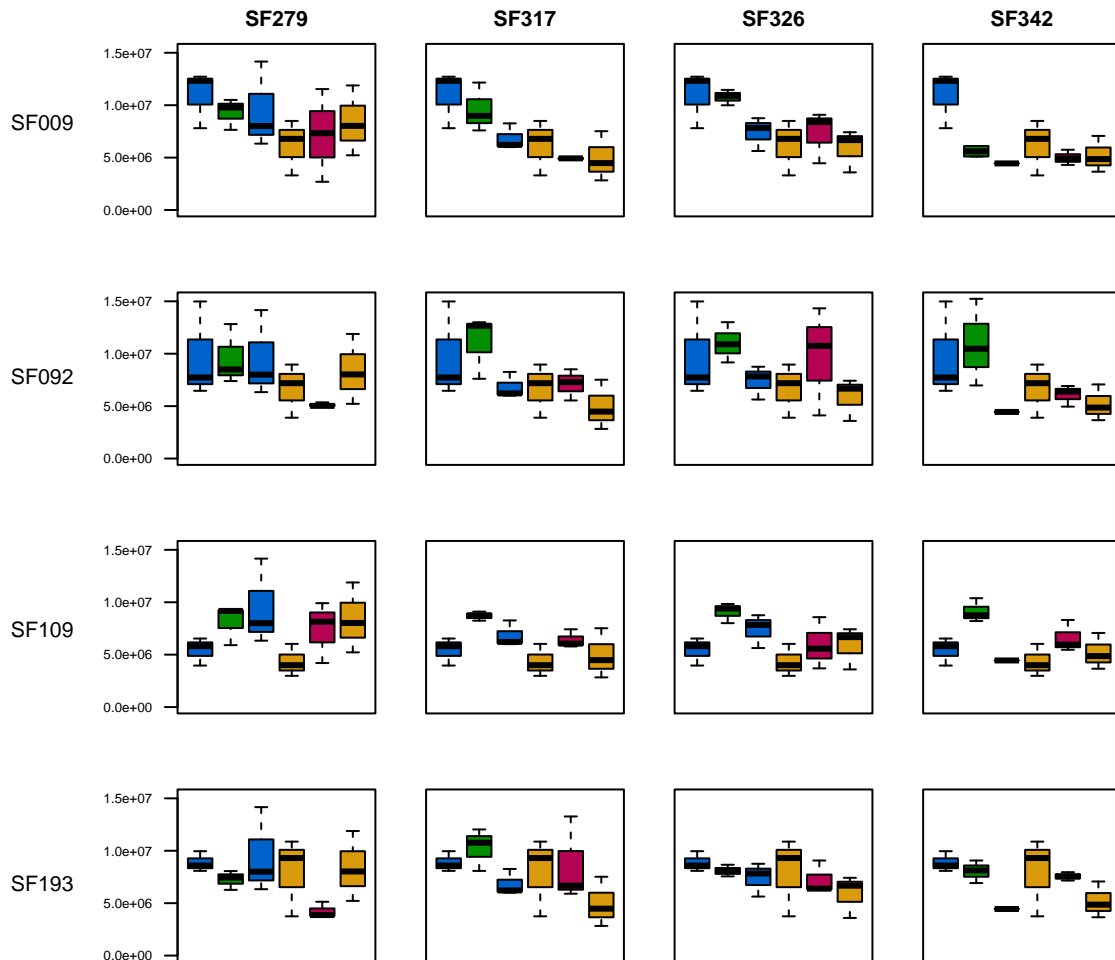

HanXRQChr02g0050121  
Probable aspartate aminotransferase 5

- Parents WW
- Parents WD
- Hybrids WW
- Hybrids WD

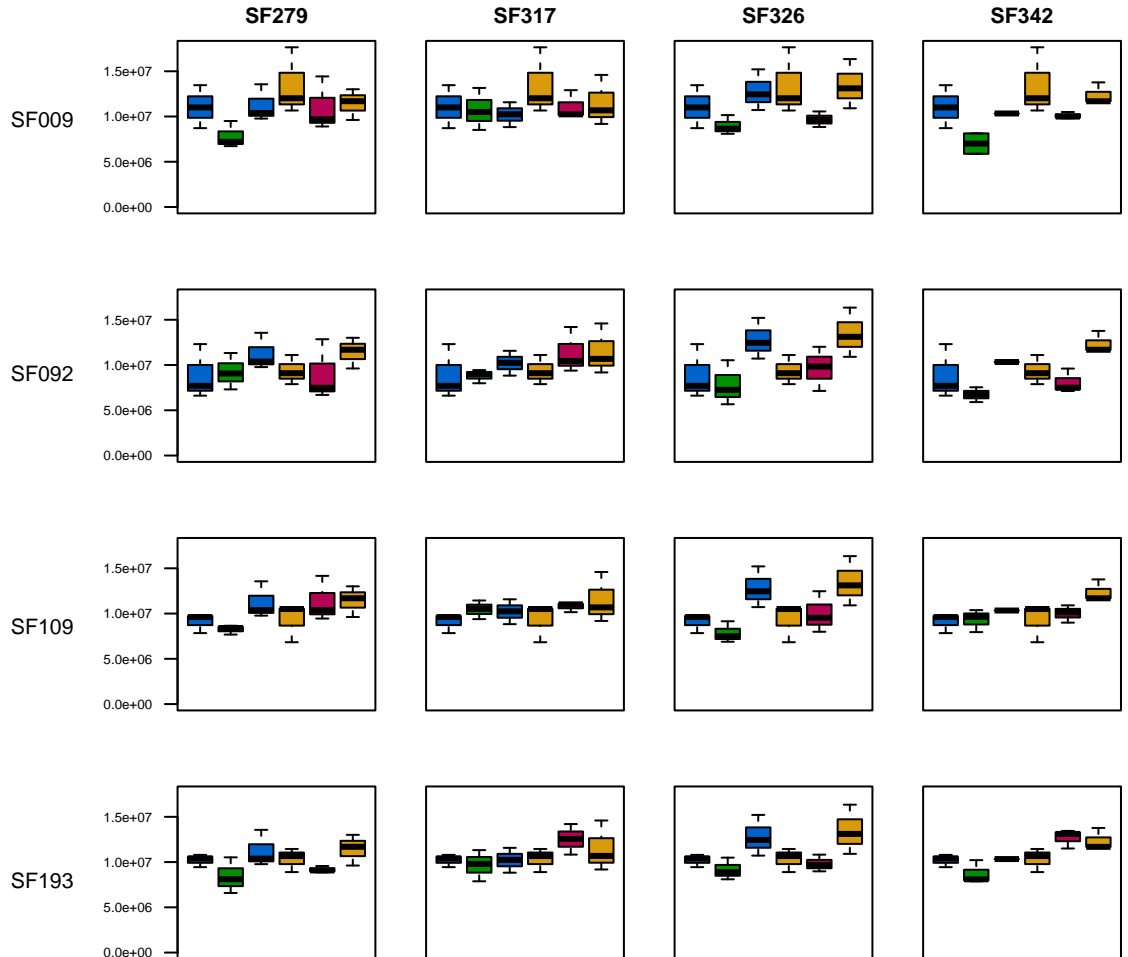

HanXRQChr10g028841  
Putative protein of unknown function  
DUF1138

Parents WW  
Parents WD  
Hybrids WW  
Hybrids WD

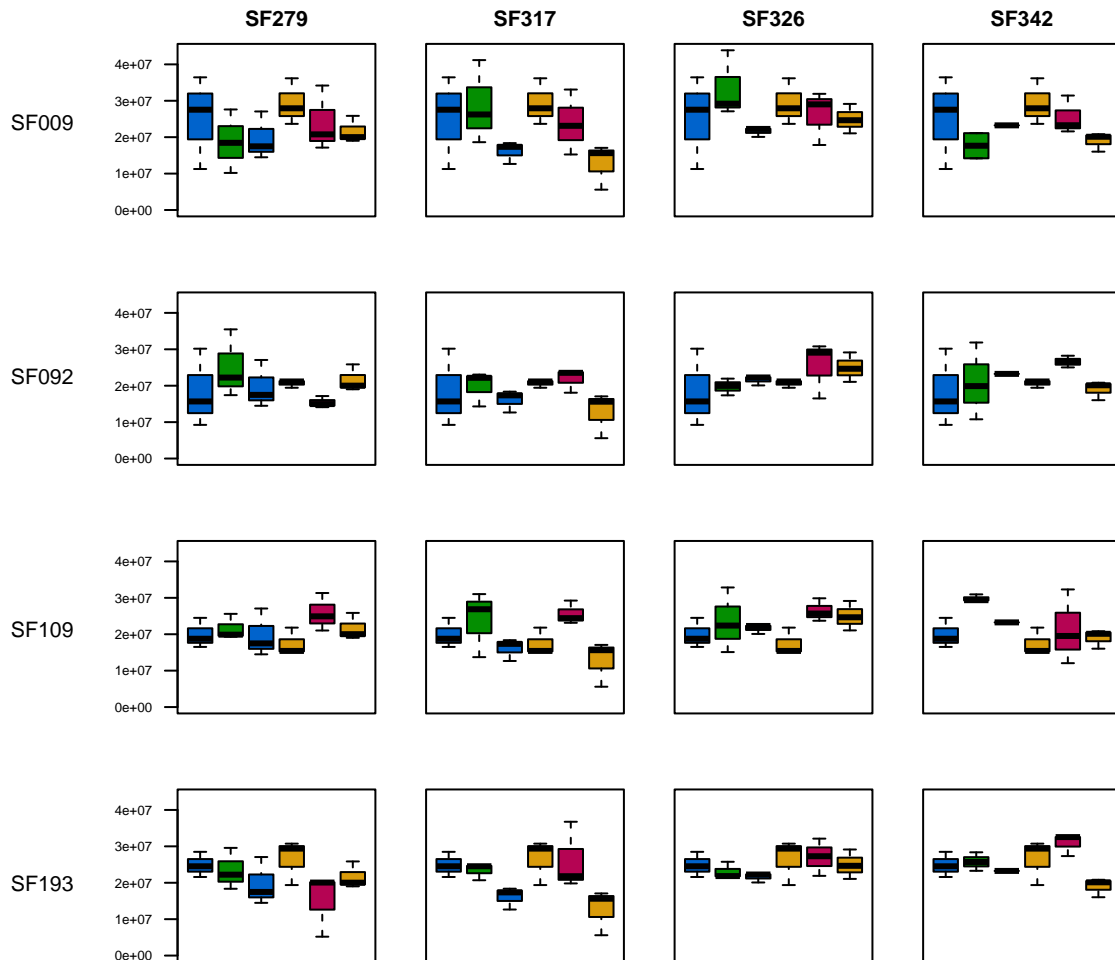

HanXRQChr06g0173271  
Probable CLP protease P4

Parents WW  
Parents WD  
Hybrids WW  
Hybrids WD

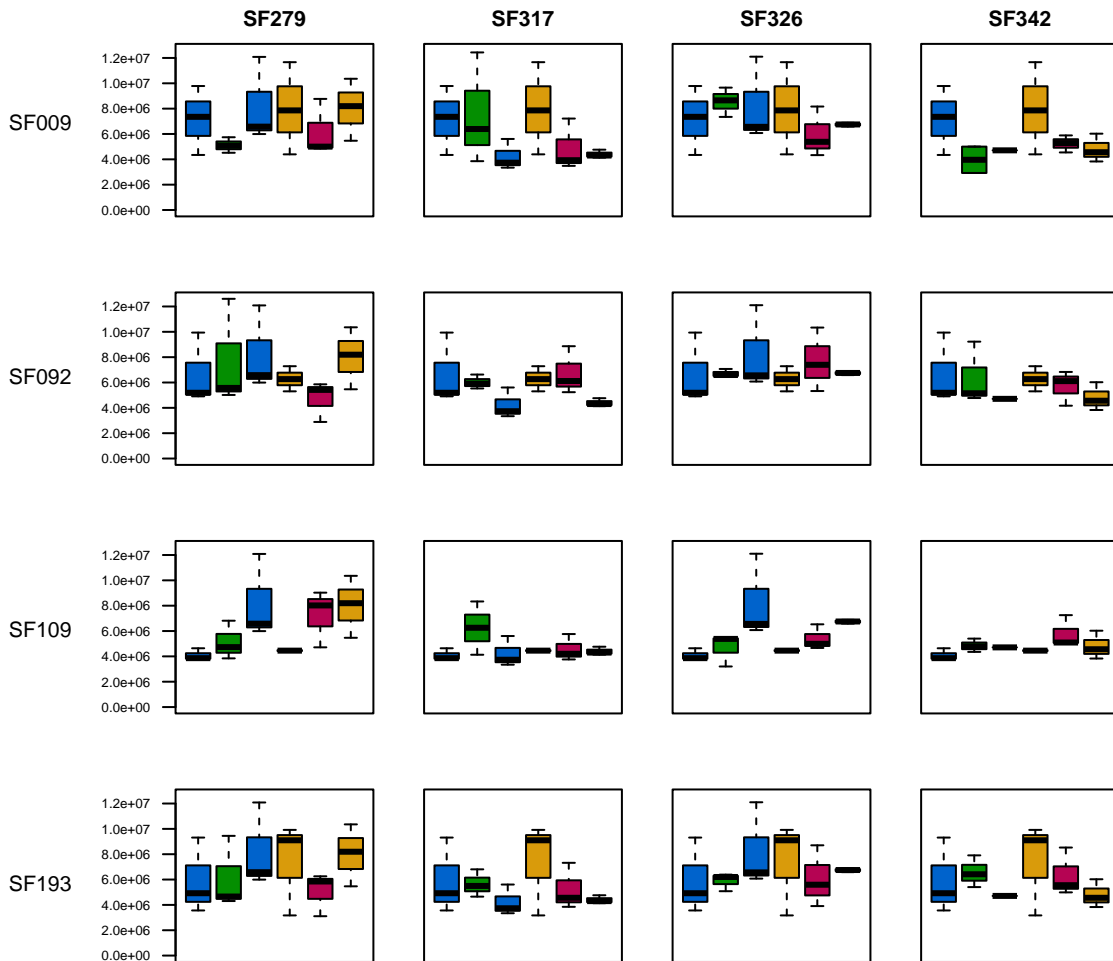

HanXRQChr14g0431181  
 Putative aspartic peptidase A1 family;  
 Aspartic peptidase domain; Xylanase inhibi

Parents WW  
 Parents WD  
 Hybrids WW  
 Hybrids WD

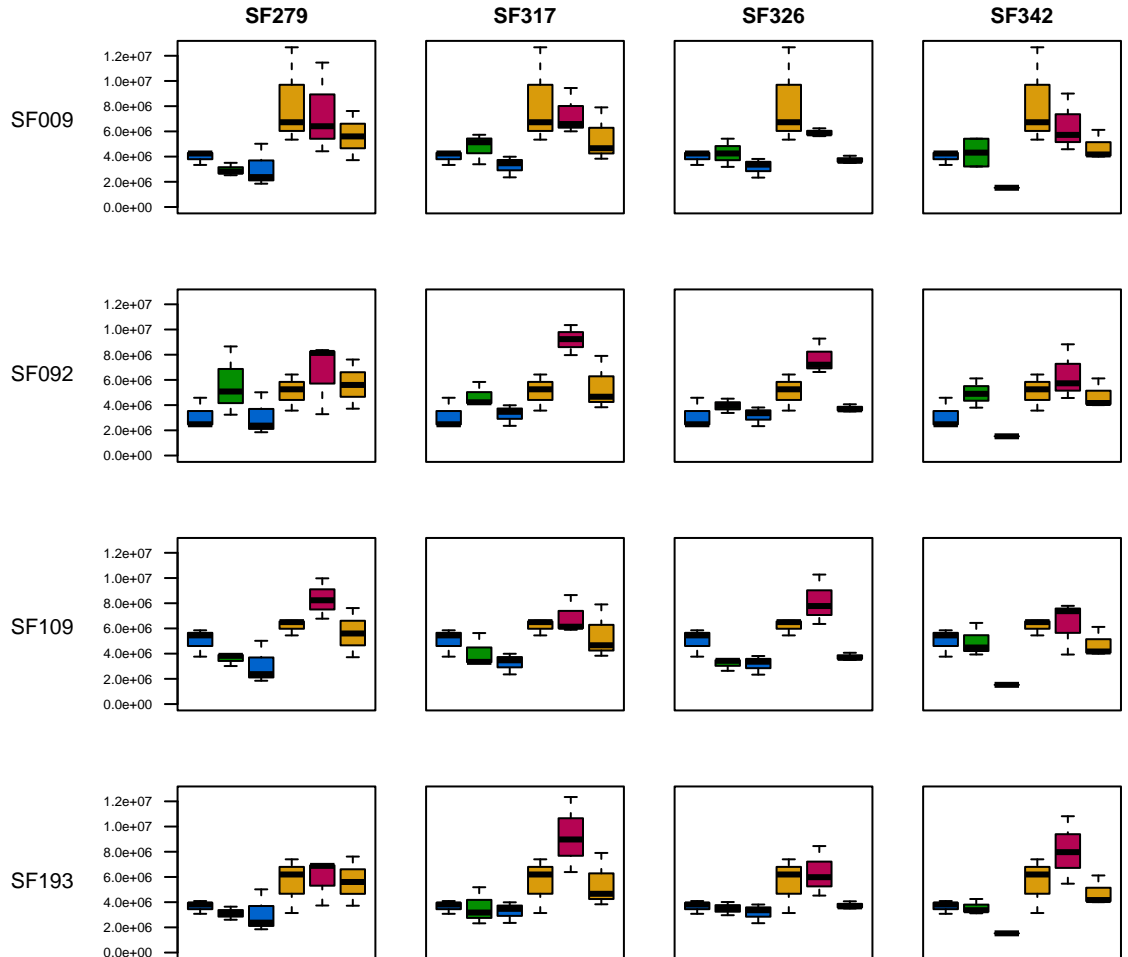

HanXRQChr06g0175611  
Putative nucleotide-binding alpha-beta  
plait domain; U1 small nuclear ribonucleopr

Parents WW  
Parents WD  
Hybrids WW  
Hybrids WD

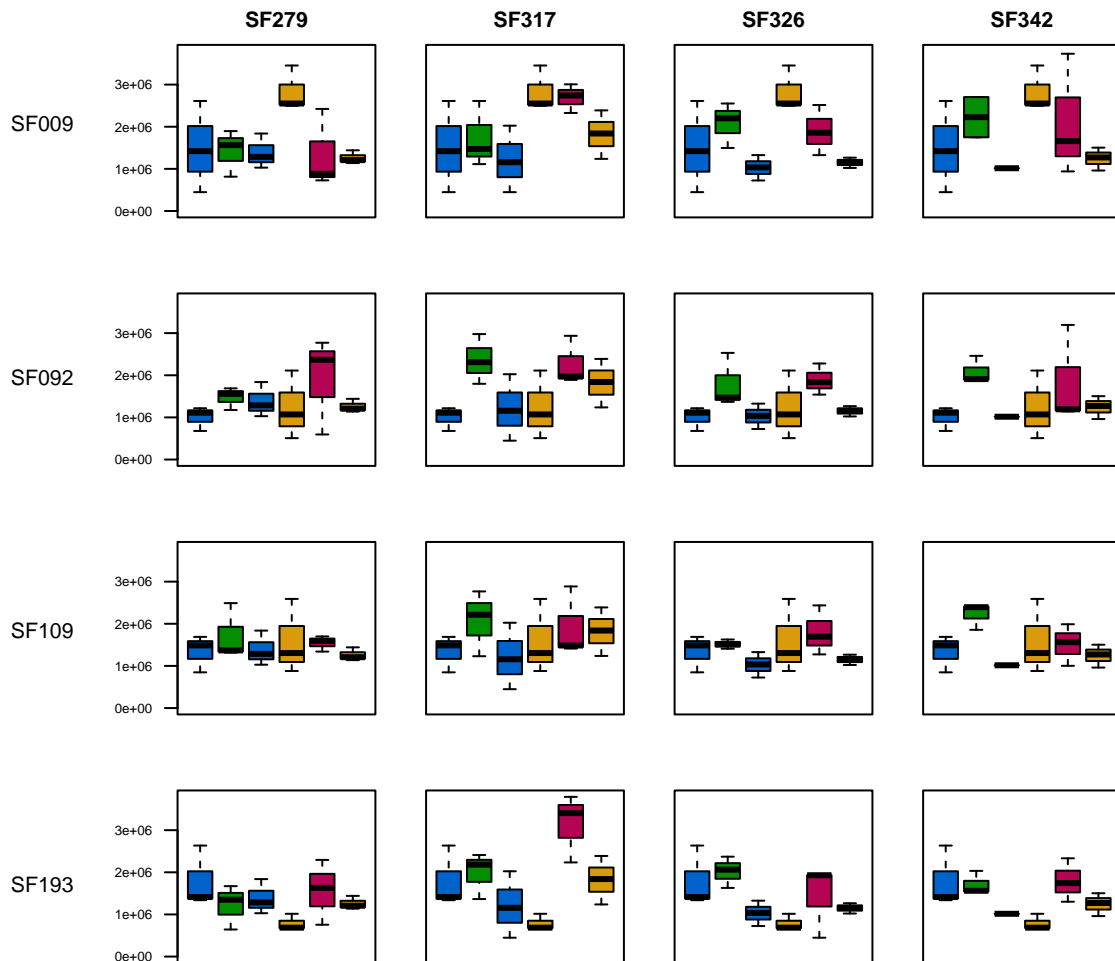

HanXRQChr13g0411111  
Probable alternative oxidase 1A

Parents WW  
Parents WD  
Hybrids WW  
Hybrids WD

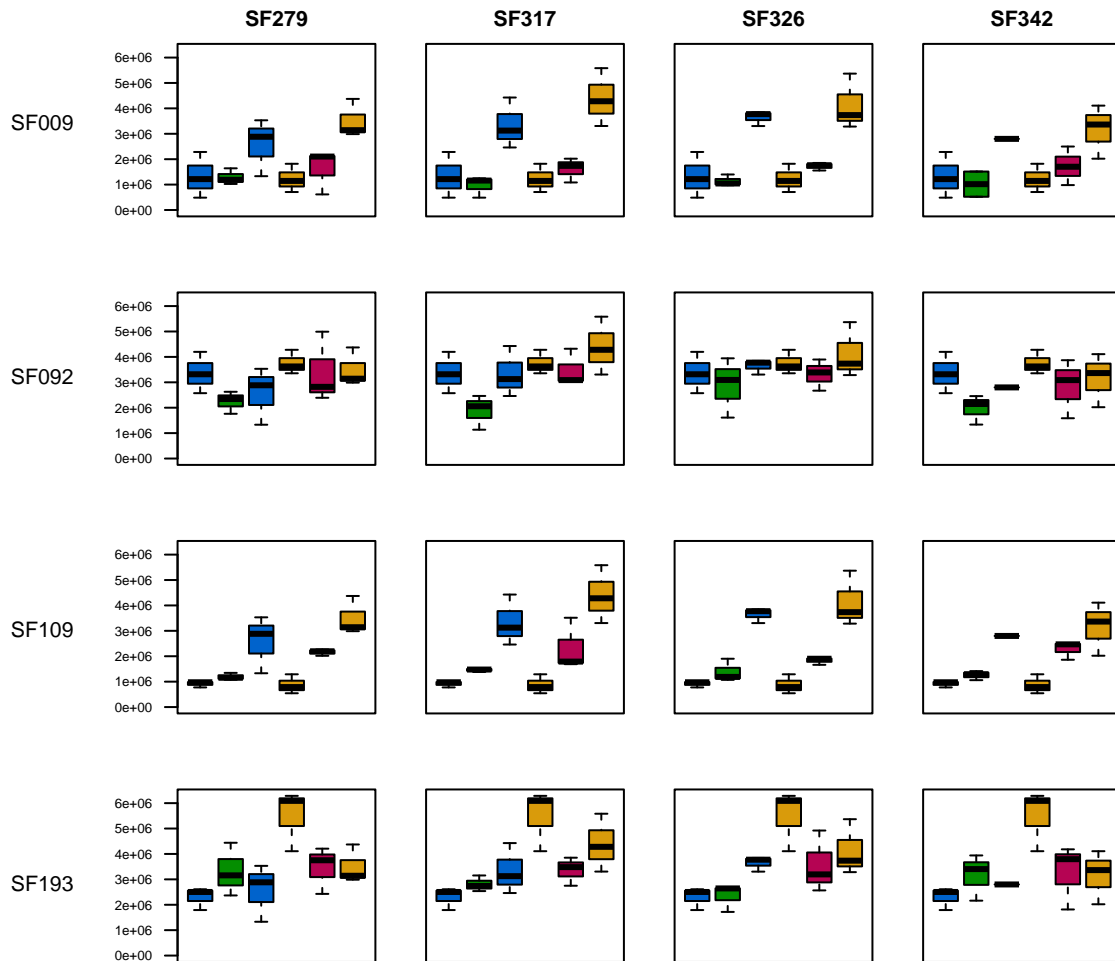



HanXRQChr03g0076001  
Probable 60S ribosomal protein L7

Parents WW  
Parents WD  
Hybrids WW  
Hybrids WD

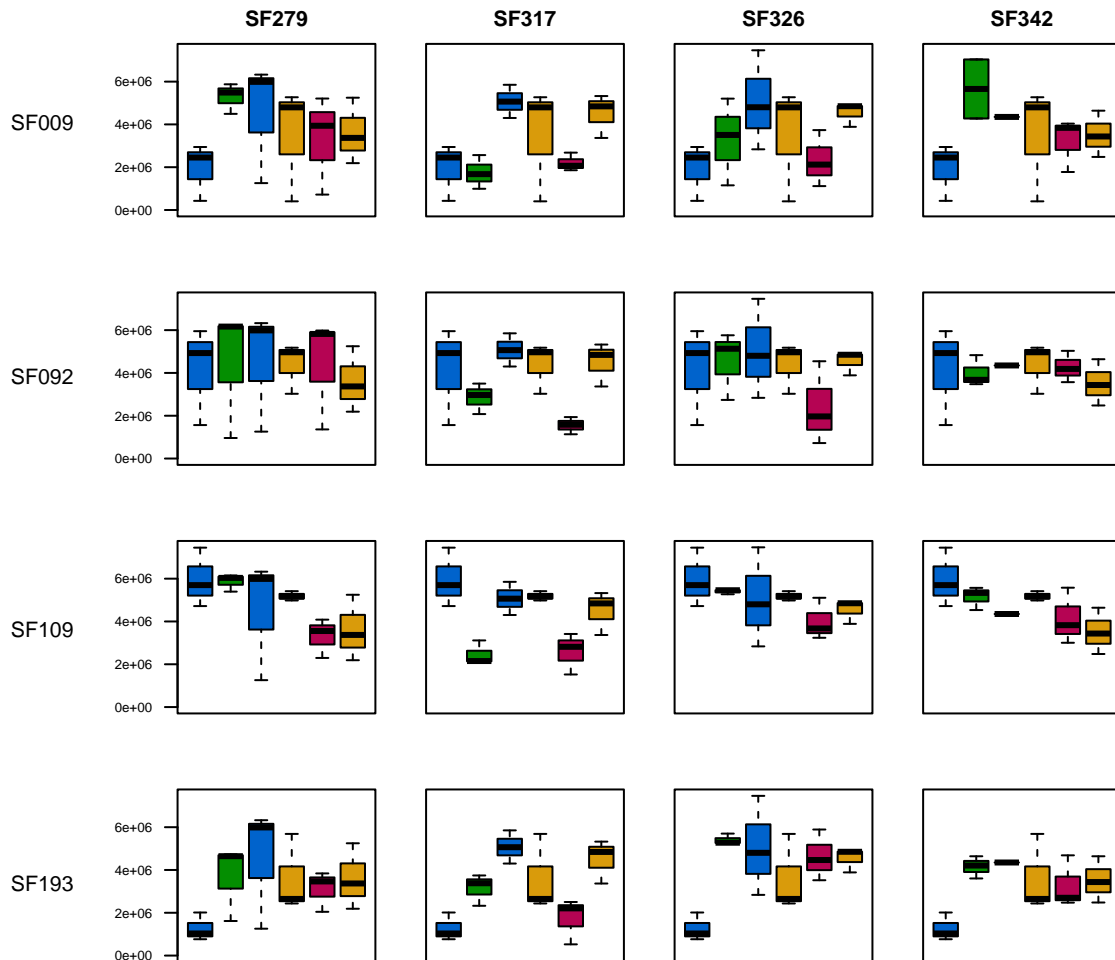

HanXRQChr01g0008251  
 Probable uridine 5'-monophosphate  
 synthase EC=4.1.1.23

Parents WW  
 Parents WD  
 Hybrids WW  
 Hybrids WD

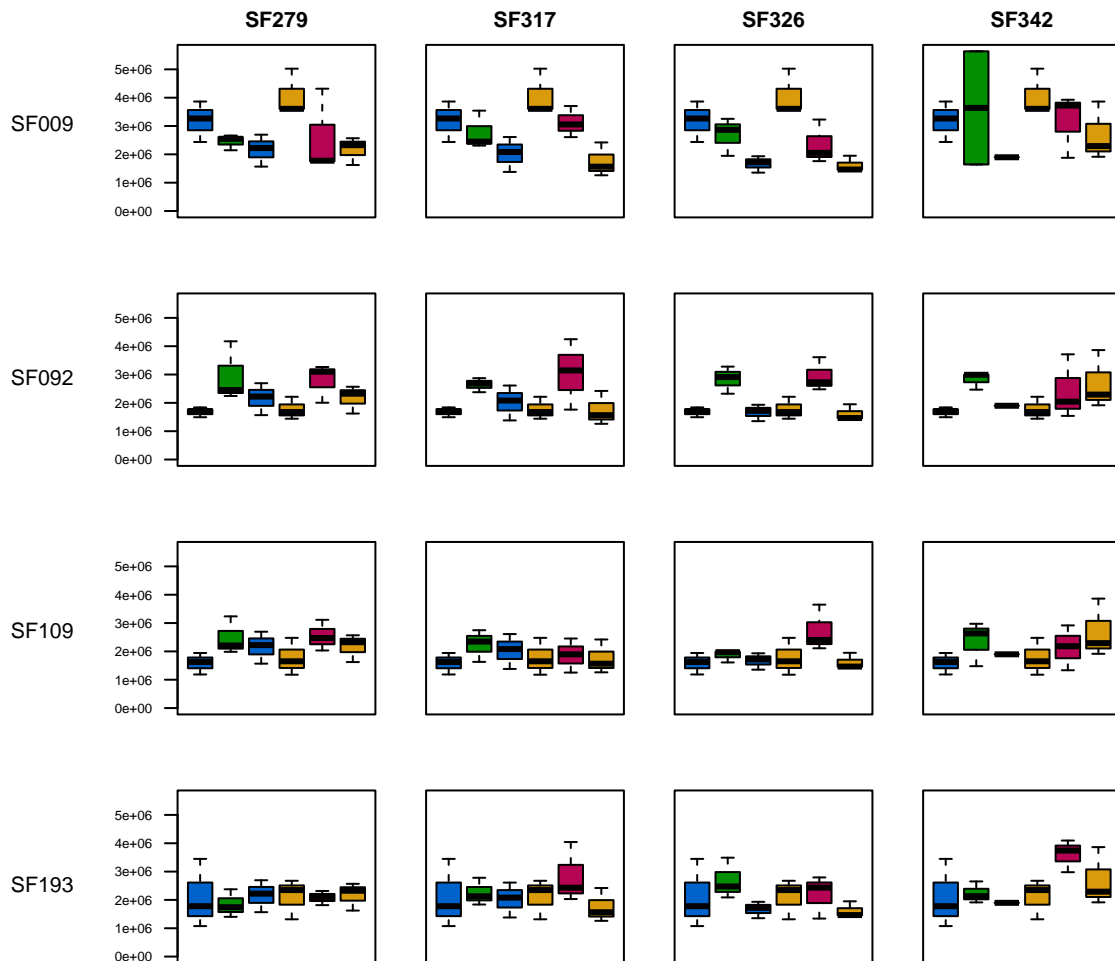

HanXRQChr09g0265771  
Probable B12D protein

Parents WW  
Parents WD  
Hybrids WW  
Hybrids WD

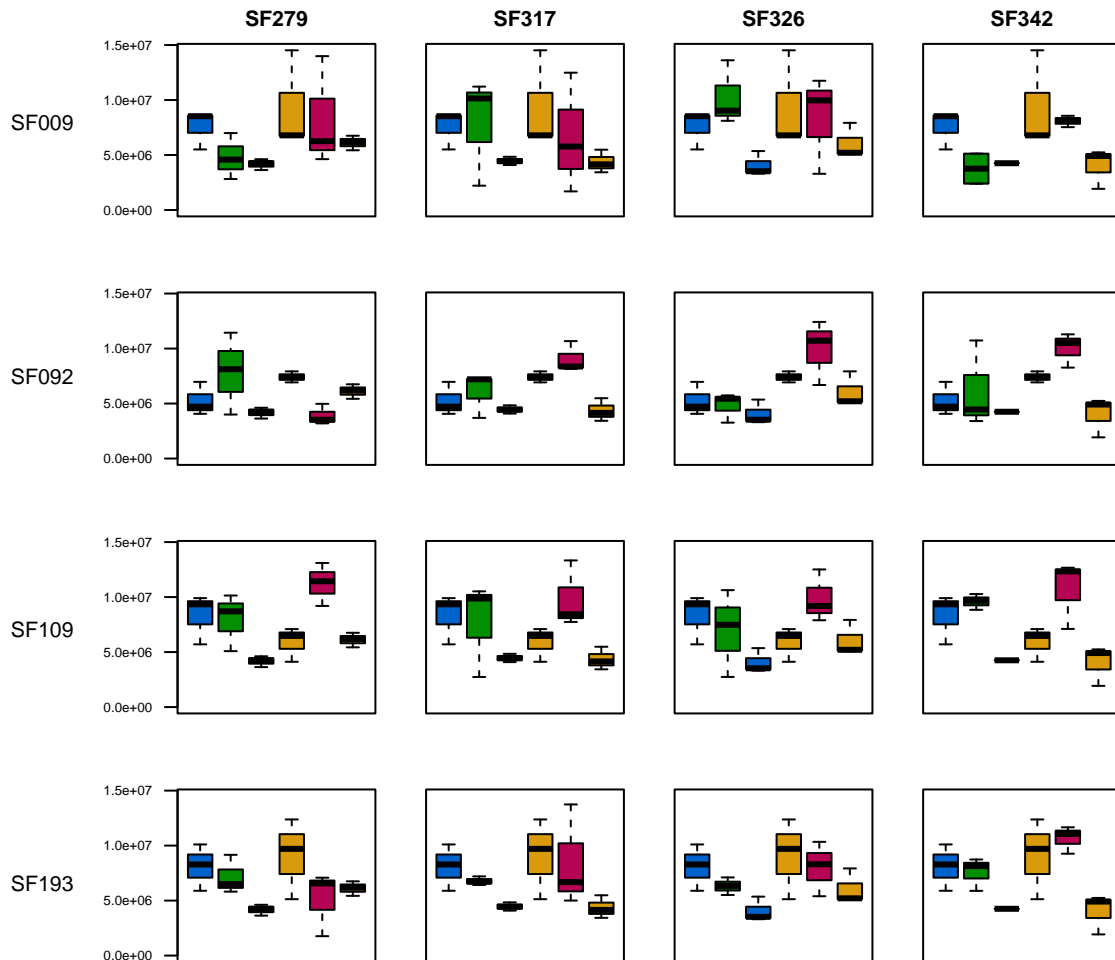

HanXRQChr02g0042411  
Putative MALE GAMETOPHYTE DEFECT1'

Parents WW  
Parents WD  
Hybrids WW  
Hybrids WD

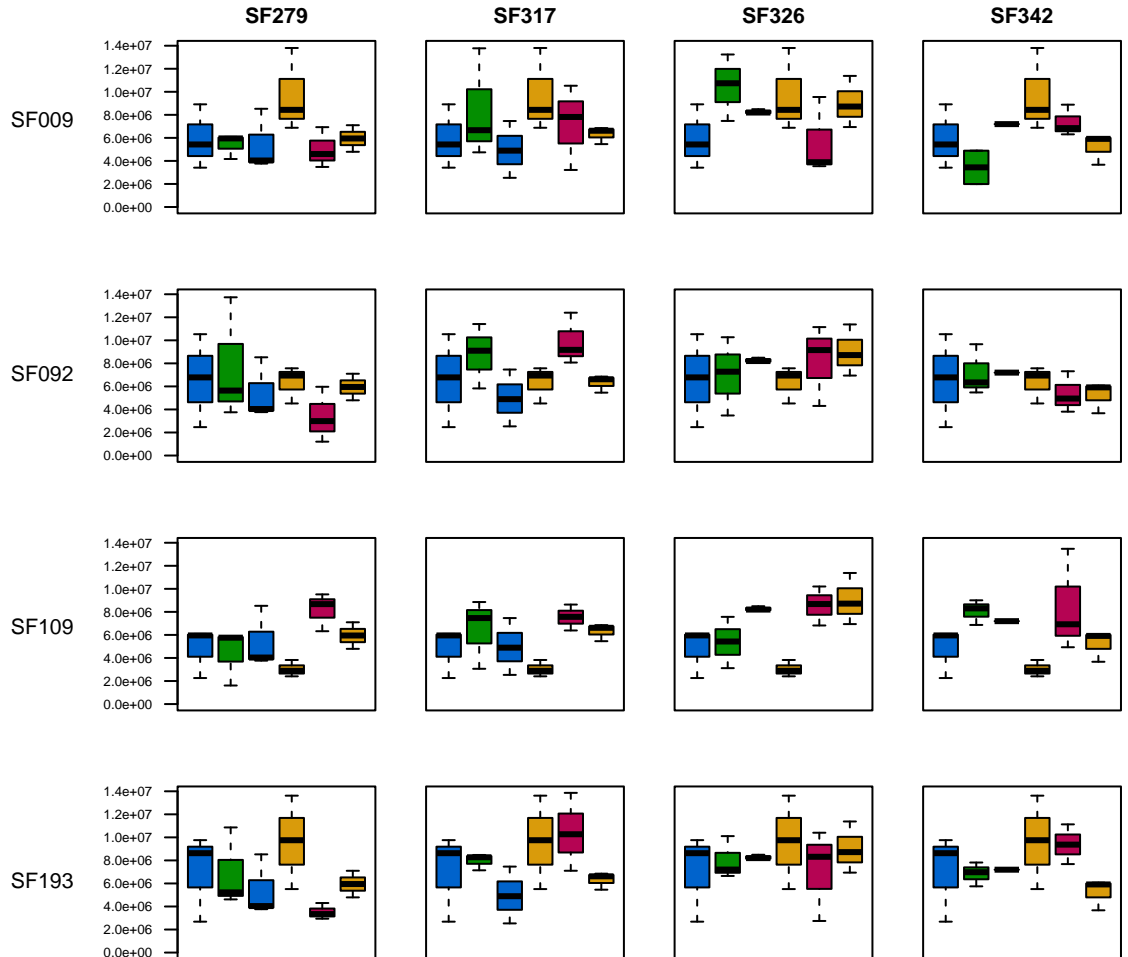

HanXRQChr13g0387971  
Putative nascent polypeptide-associated  
complex NAC domain

Parents WW  
Parents WD  
Hybrids WW  
Hybrids WD

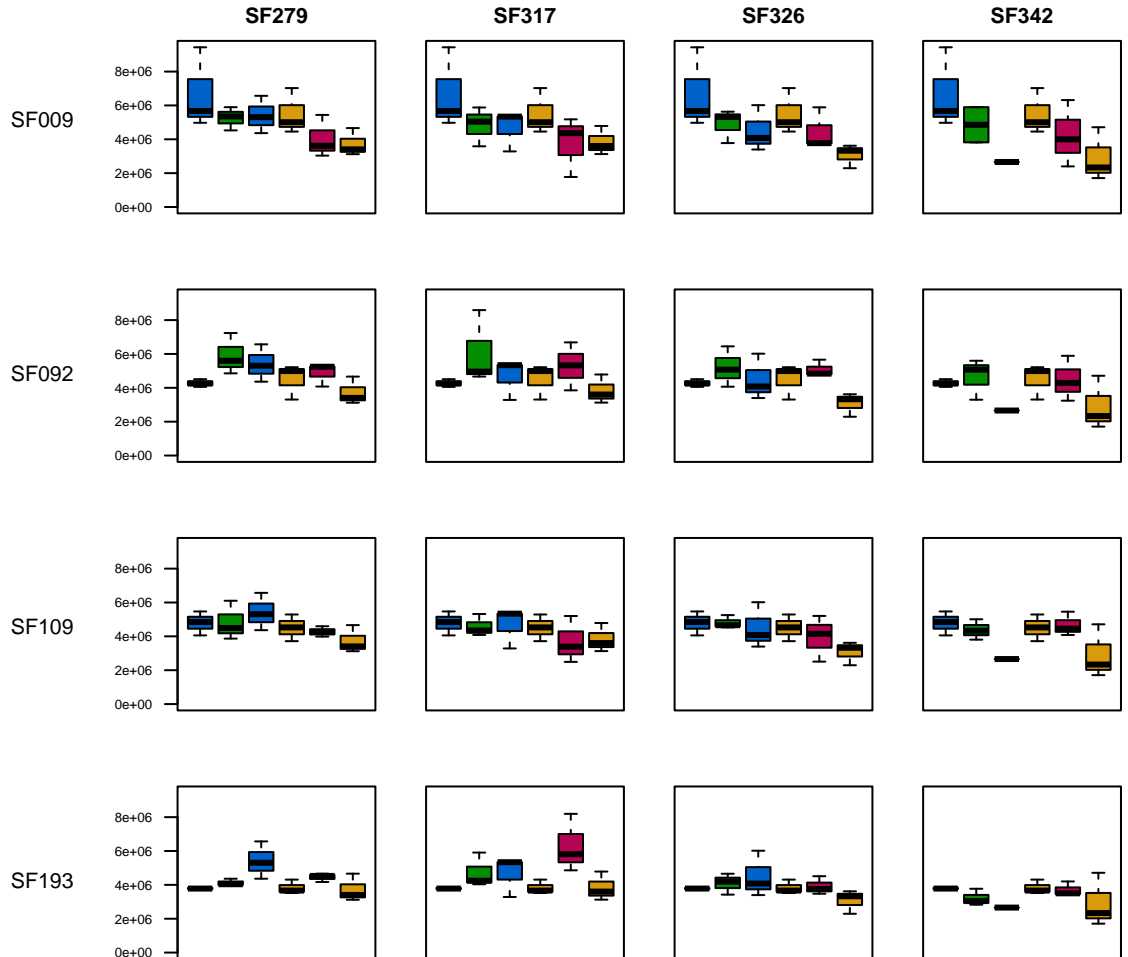

HanXRQChr12g0377281  
Probable monodehydroascorbate reductase

Parents WW  
Parents WD  
Hybrids WW  
Hybrids WD

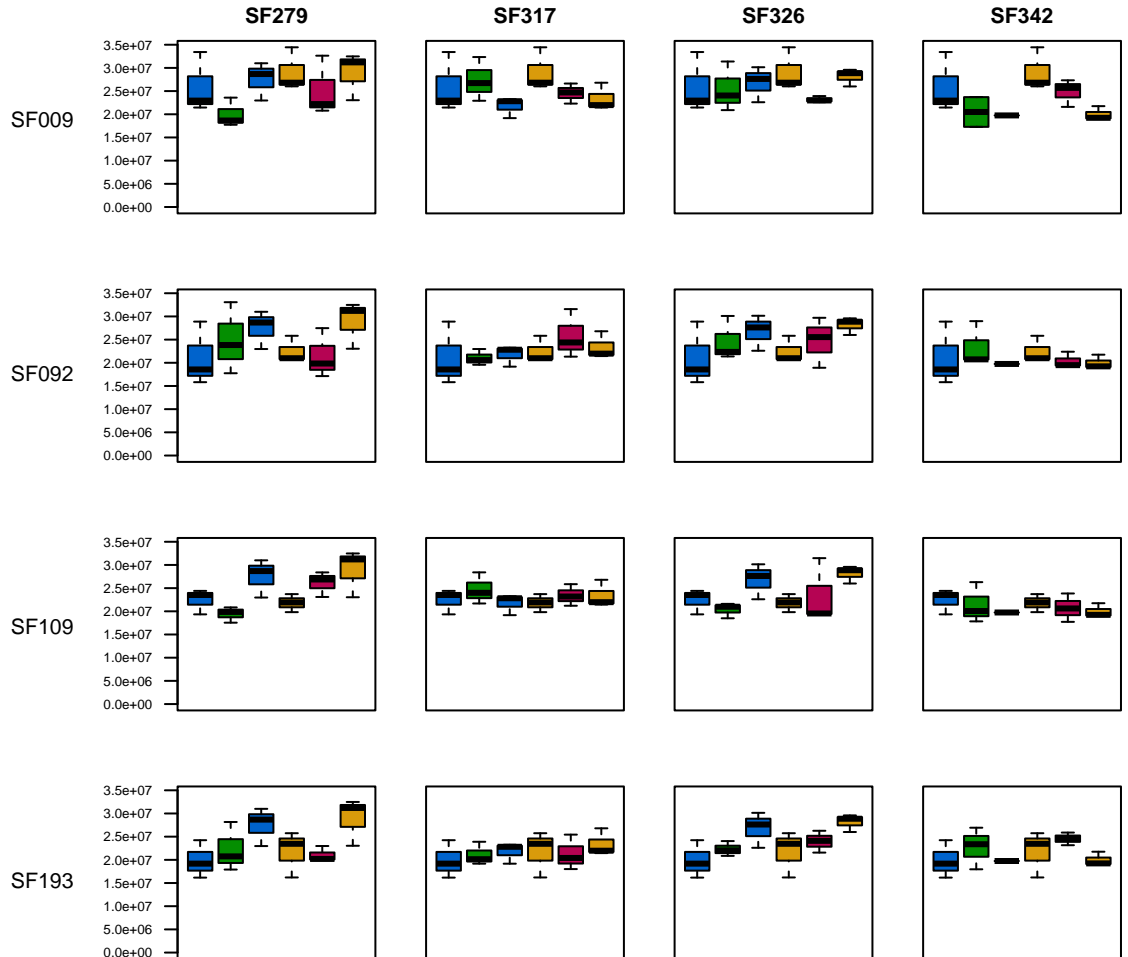

HanXRQChr08g0223571  
Putative EF-hand domain pair

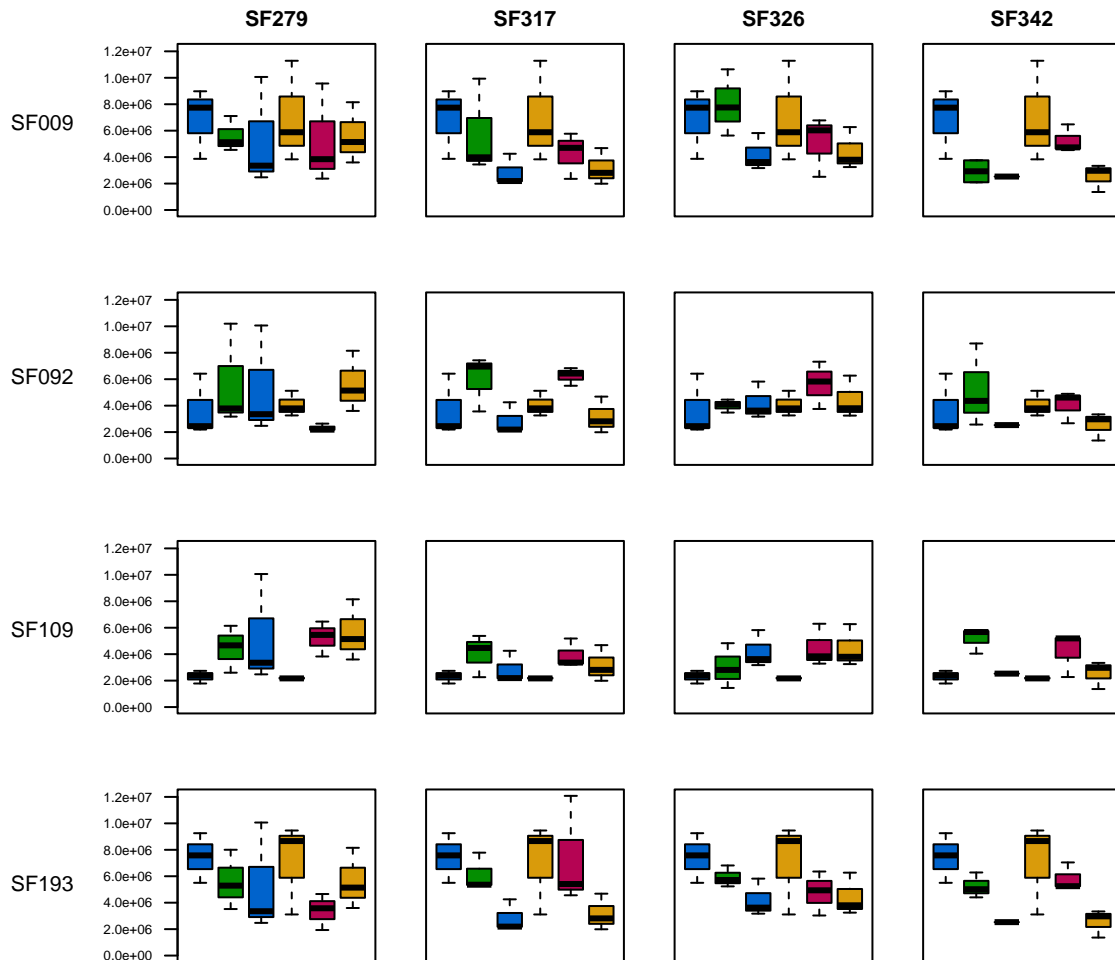

HanXRQChr03g0075481  
Putative adenine phosphoribosyl  
transferase; Phosphoribosyltransferase-like

Parents WW  
Parents WD  
Hybrids WW  
Hybrids WD

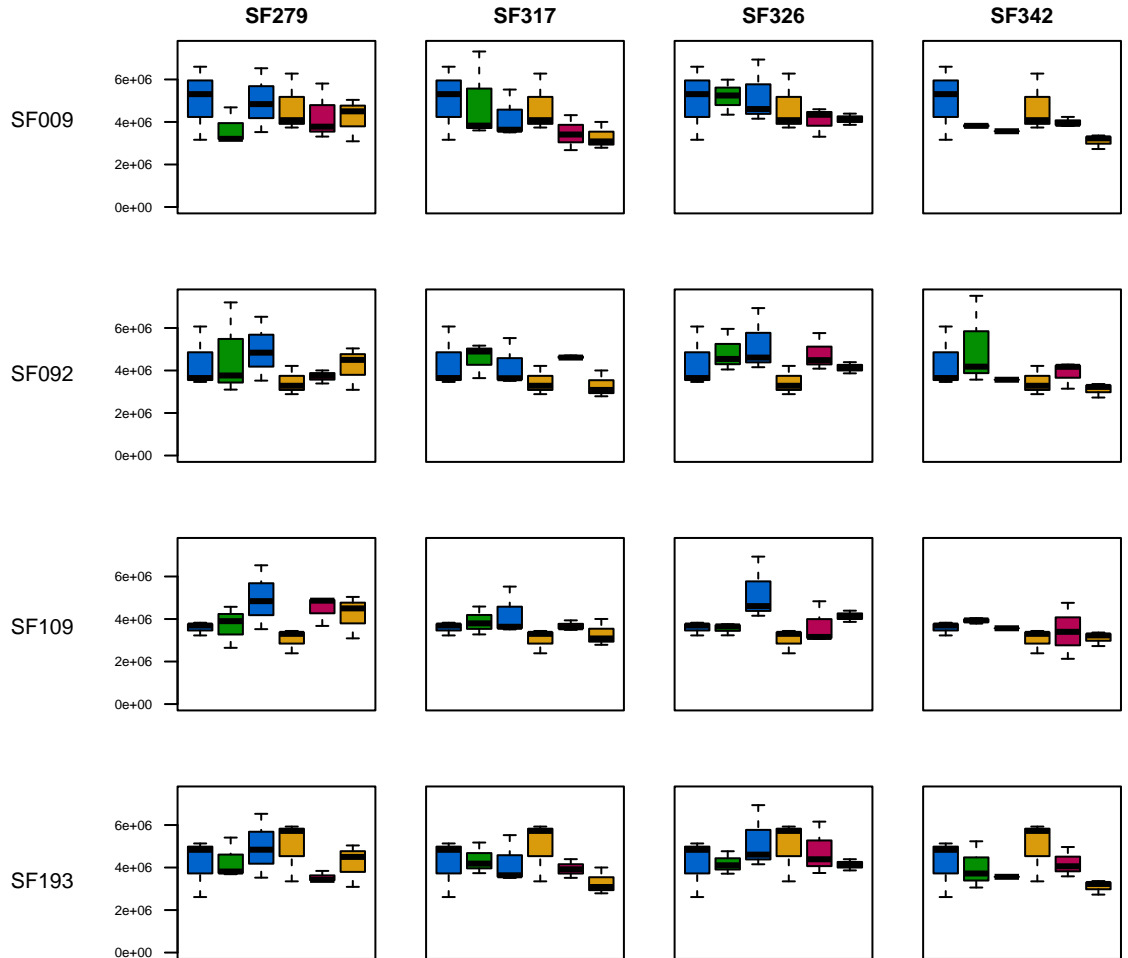



HanXRQChr09g0267661  
Probable protein TIC 22, chloroplastic

Parents WW  
Parents WD  
Hybrids WW  
Hybrids WD

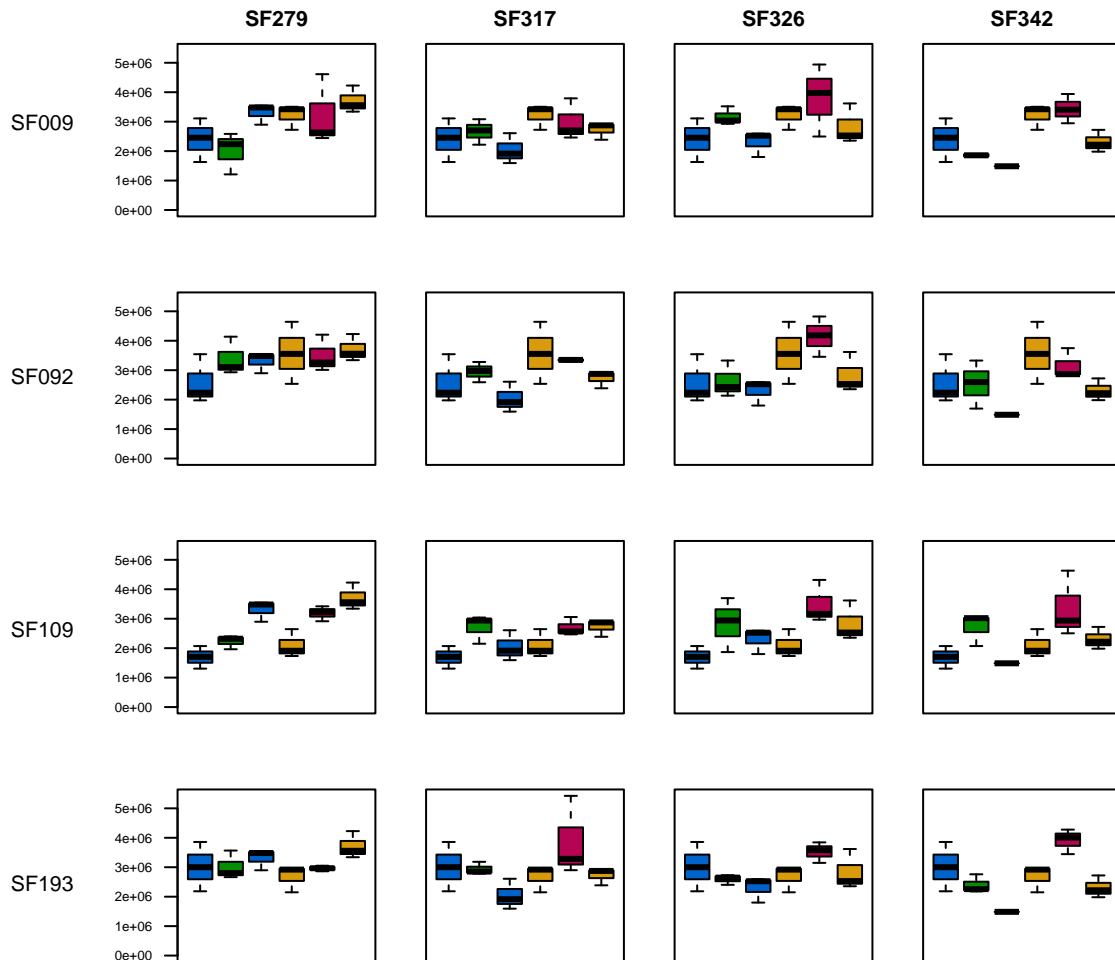

HanXRQChr08g0221681  
Putative feS cluster assembly SUF  
system, ATPase SufC; P-loop containing n

Parents WW  
Parents WD  
Hybrids WW  
Hybrids WD

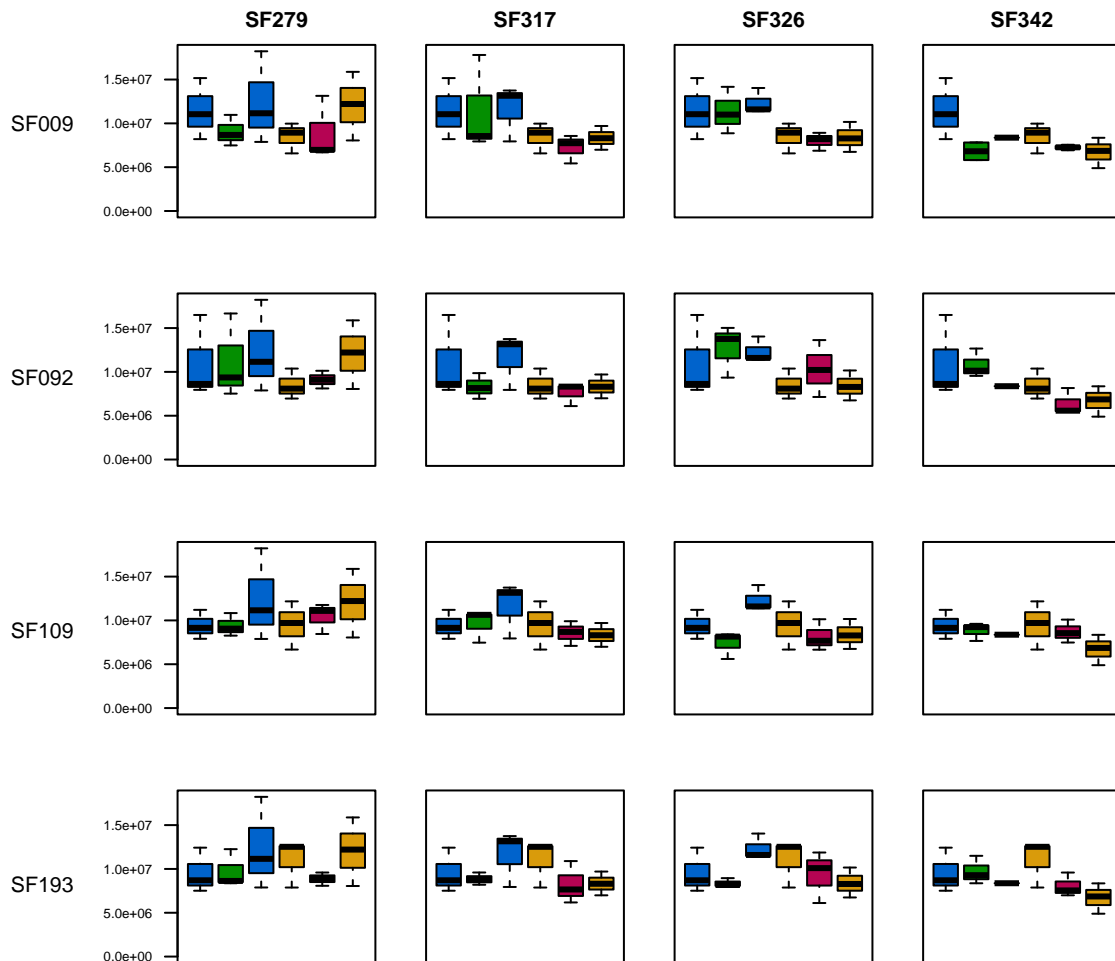

HanXRQChr01g0004491  
Putative aspartic peptidase A1 family;  
Aspartic peptidase domain; Xylanase inhibi

Parents WW  
Parents WD  
Hybrids WW  
Hybrids WD

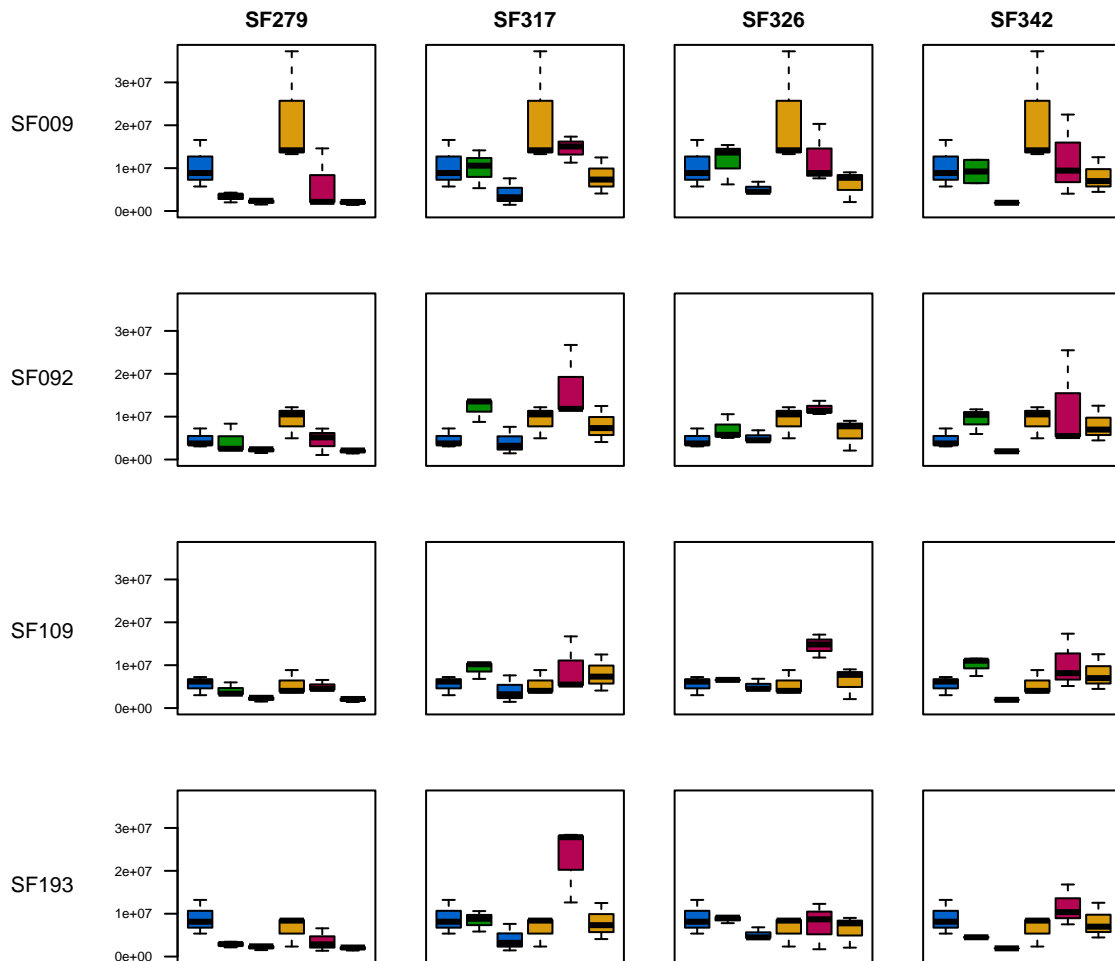

HanXRQChr14g0428971  
Putative triosephosphate isomerase;  
Aldolase-type TIM barrel

Parents WW  
Parents WD  
Hybrids WW  
Hybrids WD

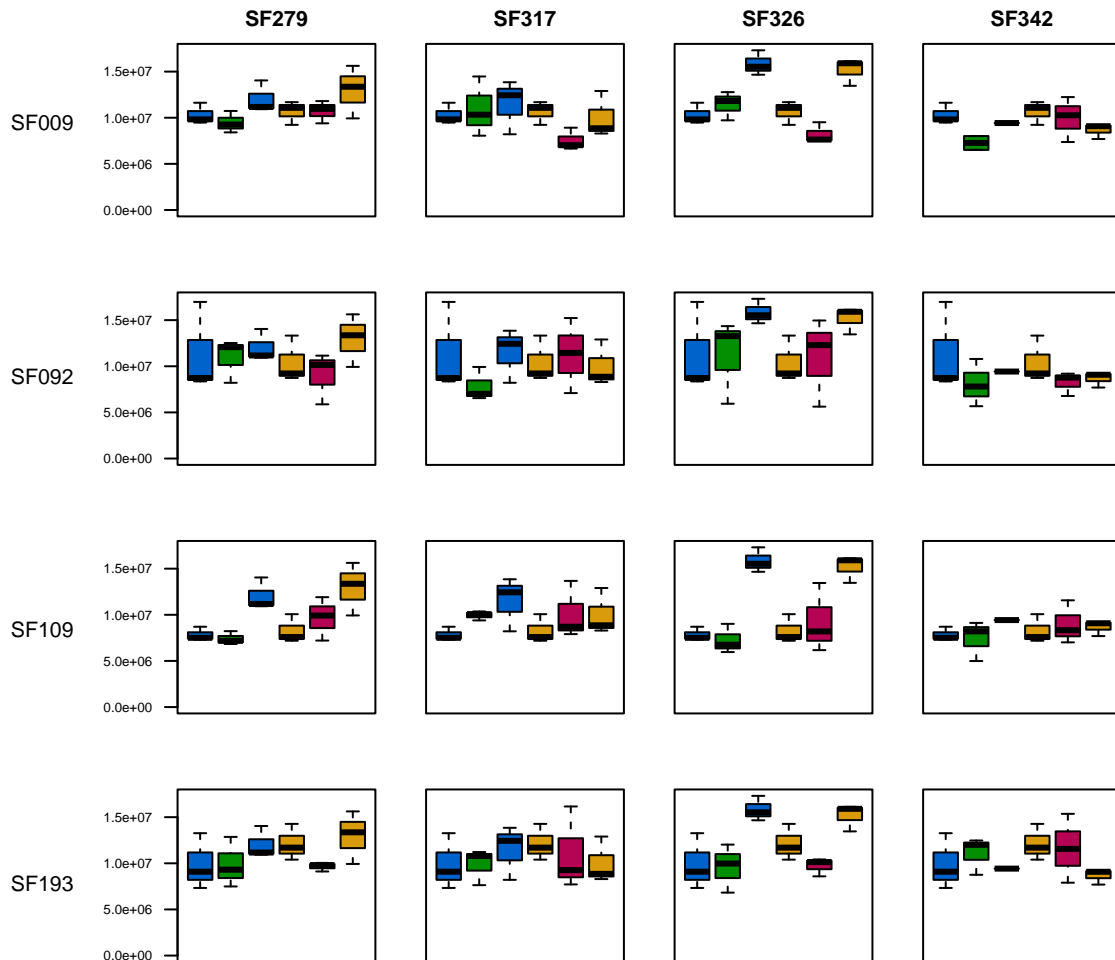

HanXRQChr02g0043141  
Probable ribulose-phosphate  
3-epimerase, chloroplastic

Parents WW  
Parents WD  
Hybrids WW  
Hybrids WD

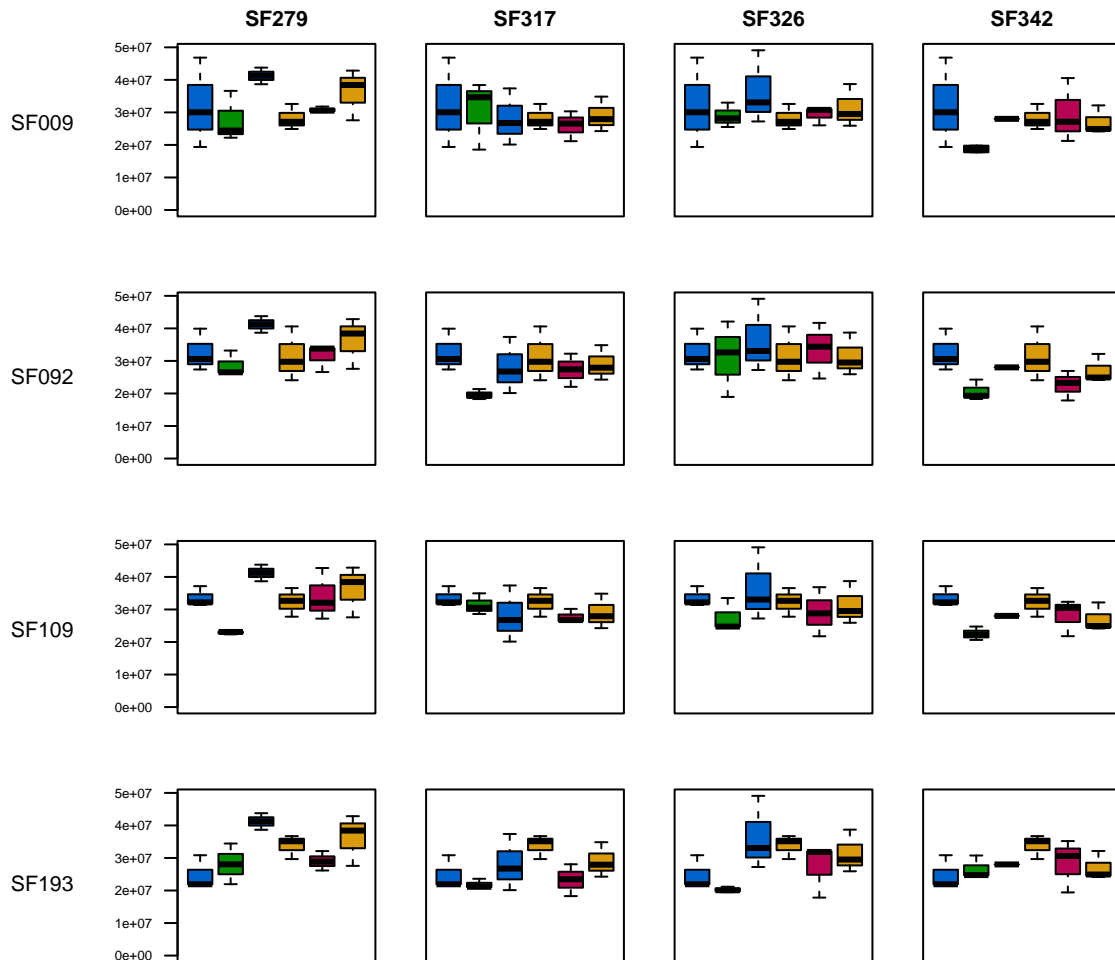

HanXRQChr16g0504401  
Putative SGNH hydrolase-type esterase  
domain

Parents WW  
Parents WD  
Hybrids WW  
Hybrids WD

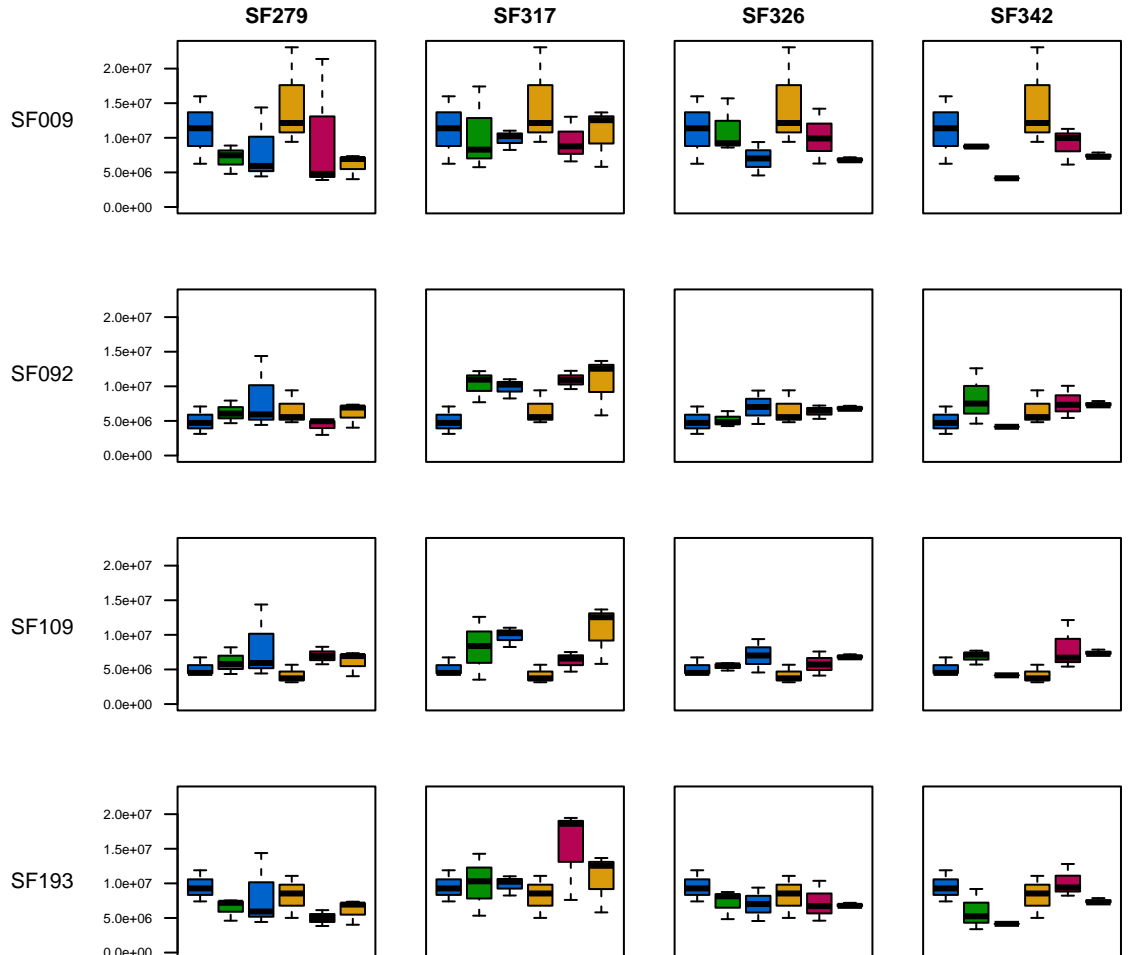

HanXRQChr14g0452871  
Probable  
4-hydroxy-3-methylbut-2-en-1-yl diphos

Parents WW  
Parents WD  
Hybrids WW  
Hybrids WD

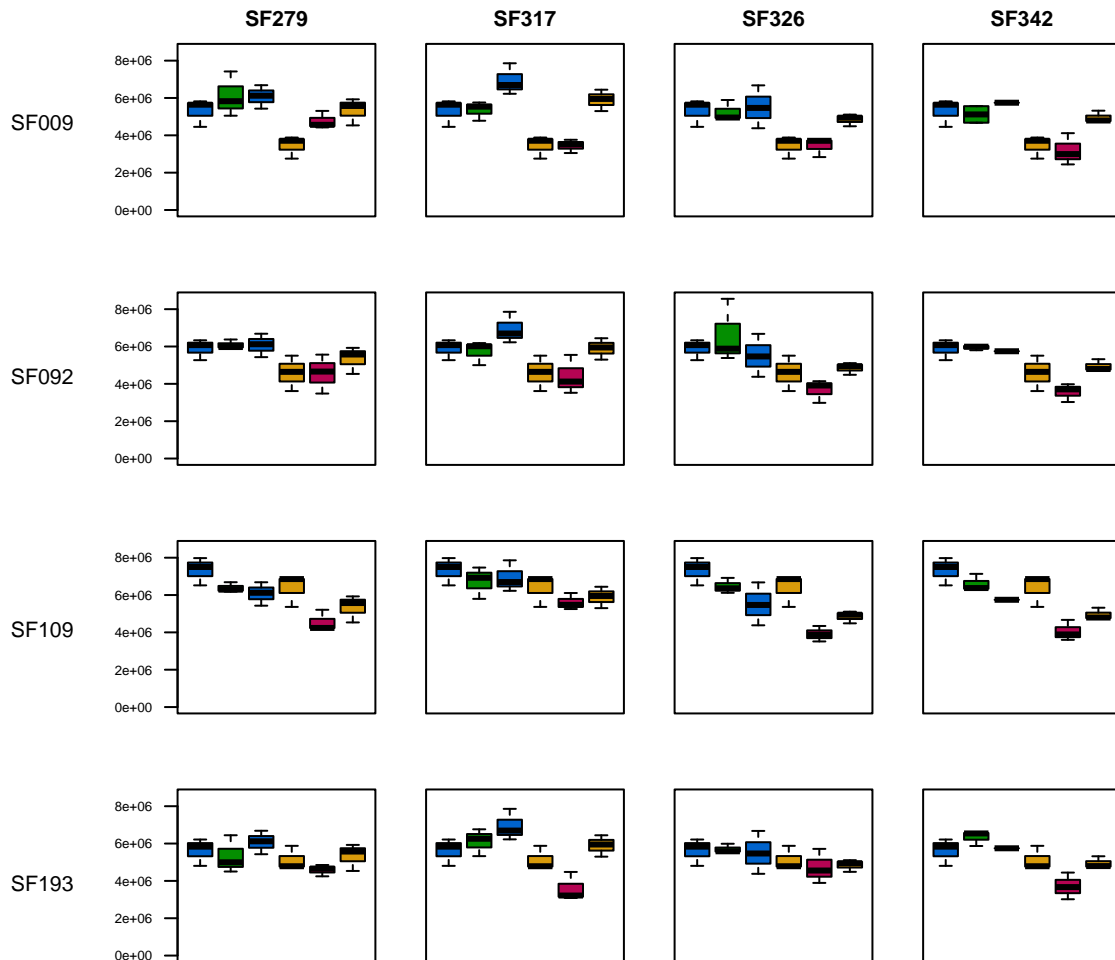

HanXRQChr14g0454131  
Probable 2-isopropylmalate synthase B

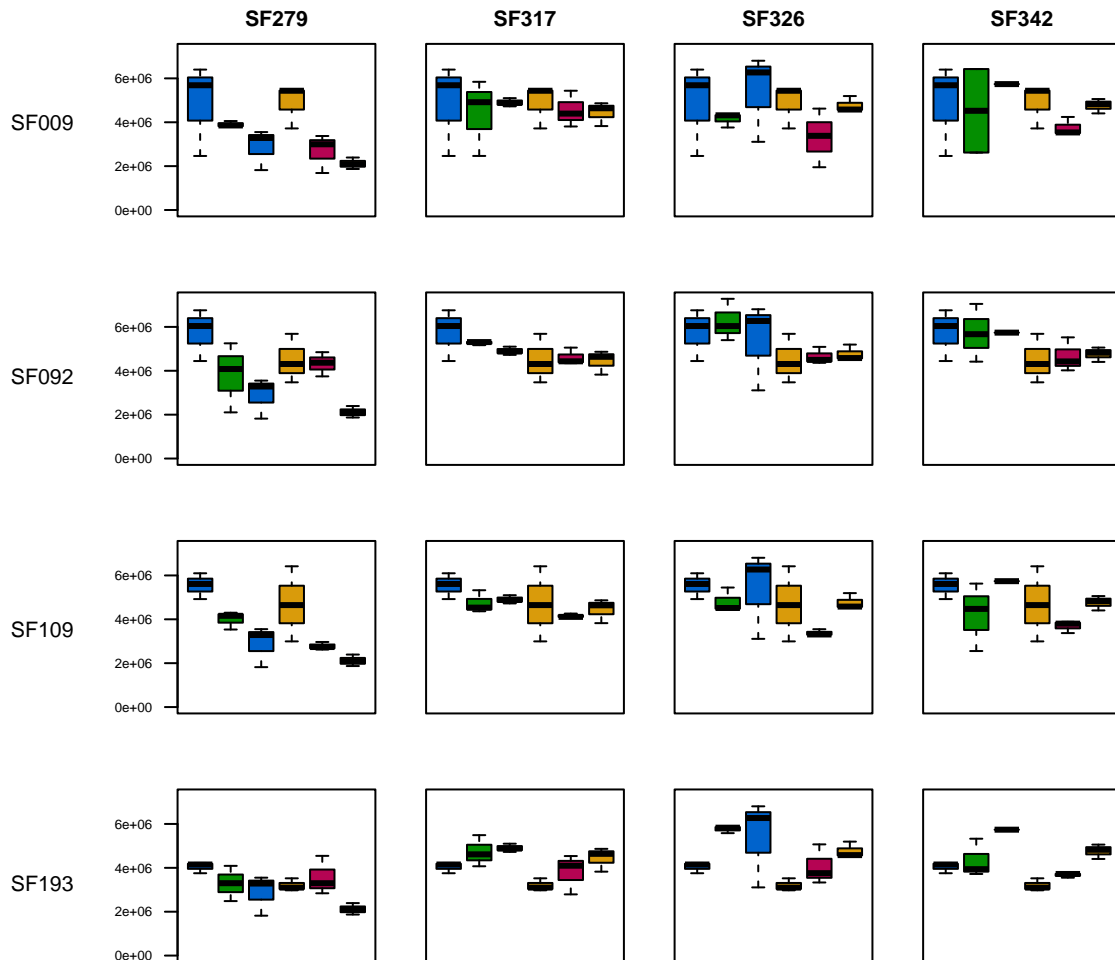



HanXRQChr14g0445461  
Probable zeta-carotene desaturase,  
chloroplastic/chromoplastic

Parents WW  
Parents WD  
Hybrids WW  
Hybrids WD

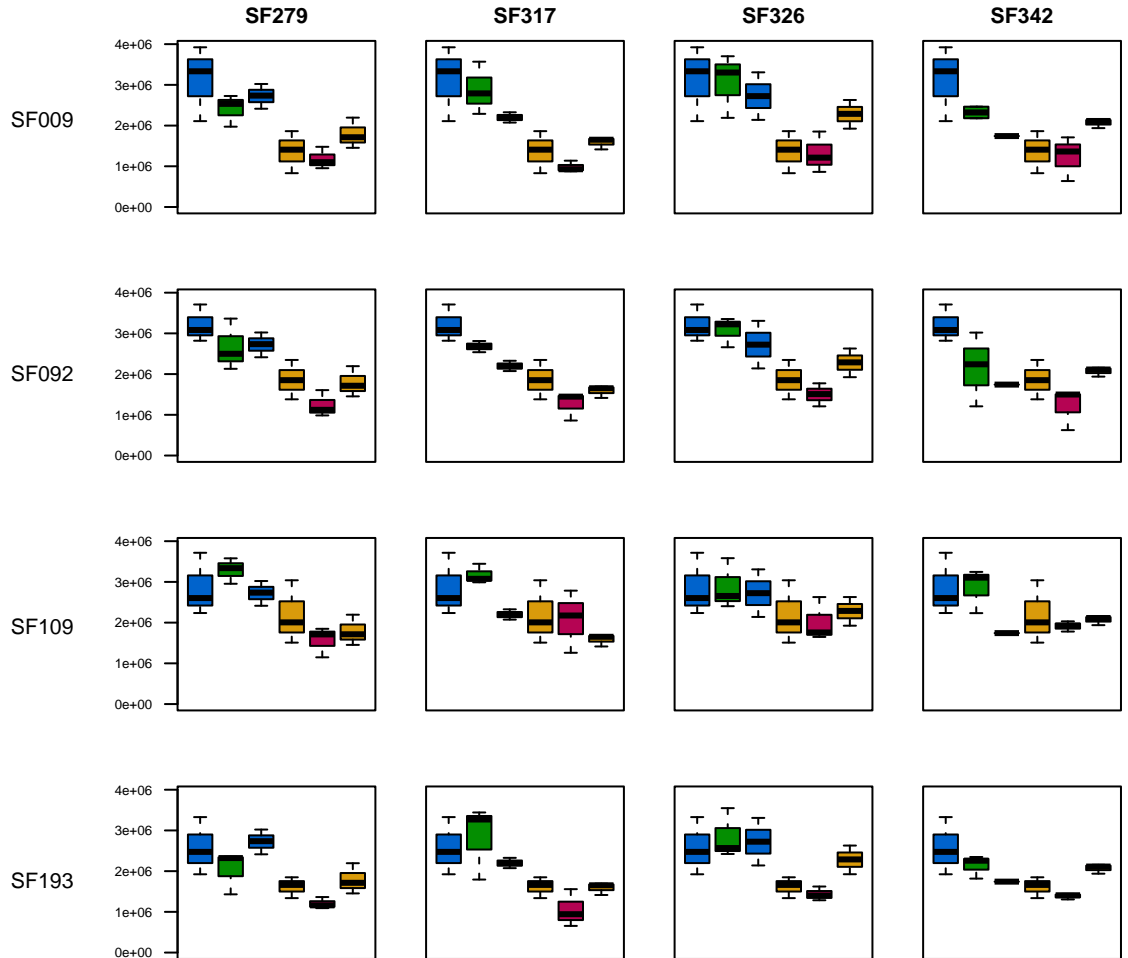

HanXRQChr13g0393191  
Putative heat shock chaperonin-binding;  
Tetratricopeptide-like helical domain

Parents WW  
Parents WD  
Hybrids WW  
Hybrids WD

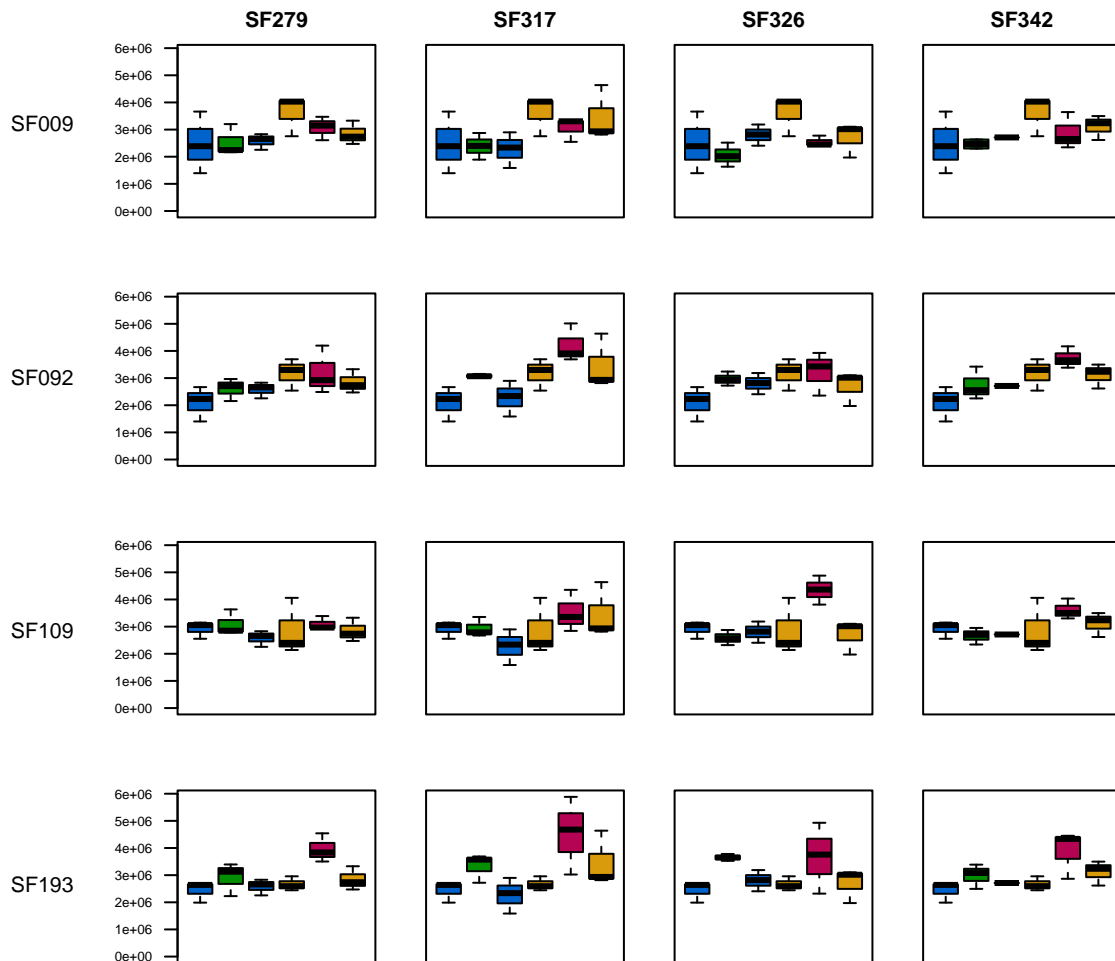

HanXRQChr10g0291371  
Putative leucine-rich repeat-containing  
N-terminal, plant-type; Leucine-rich repea

Parents WW  
Parents WD  
Hybrids WW  
Hybrids WD

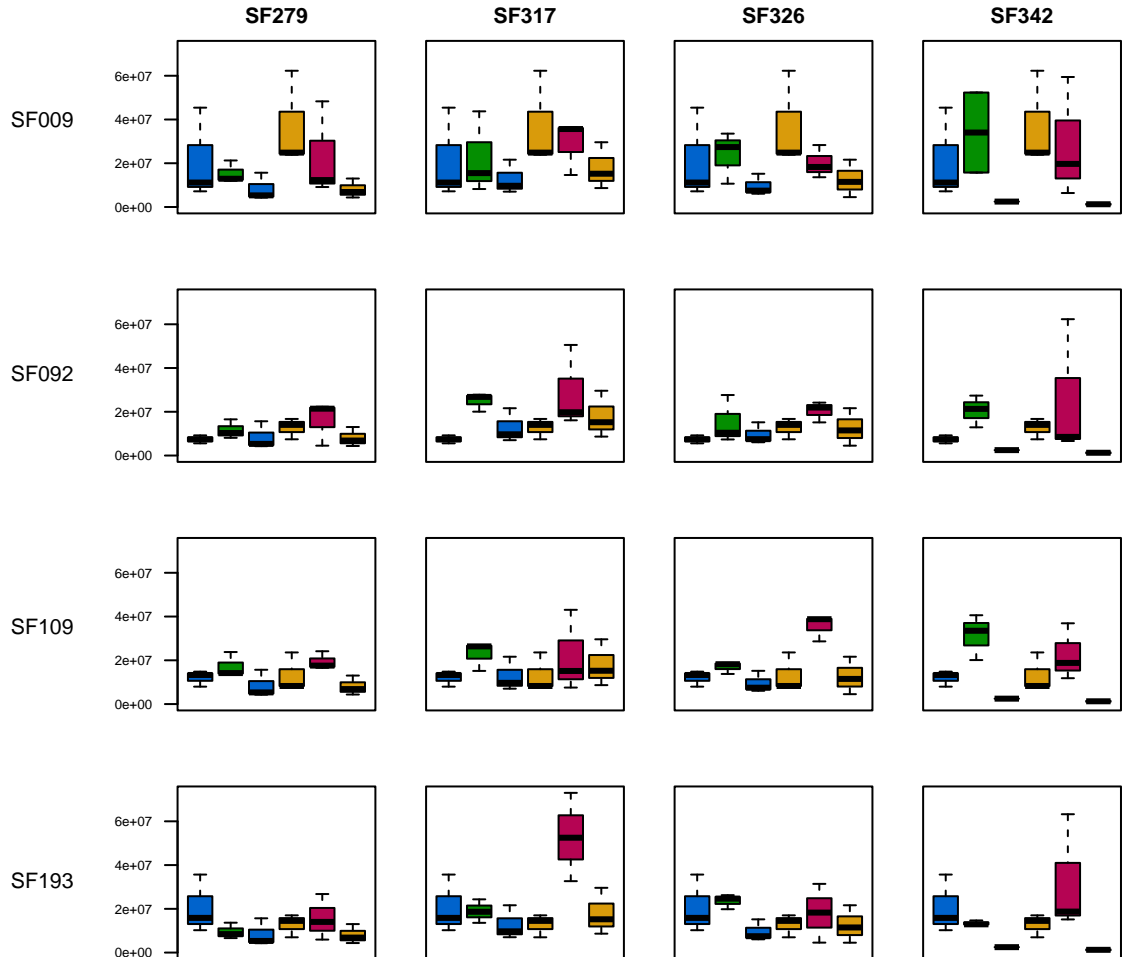

HanXRQChr06g0174841  
 Probable  
 phosphoribosylformylglycinamide cyclo-li

Parents WW  
 Parents WD  
 Hybrids WW  
 Hybrids WD

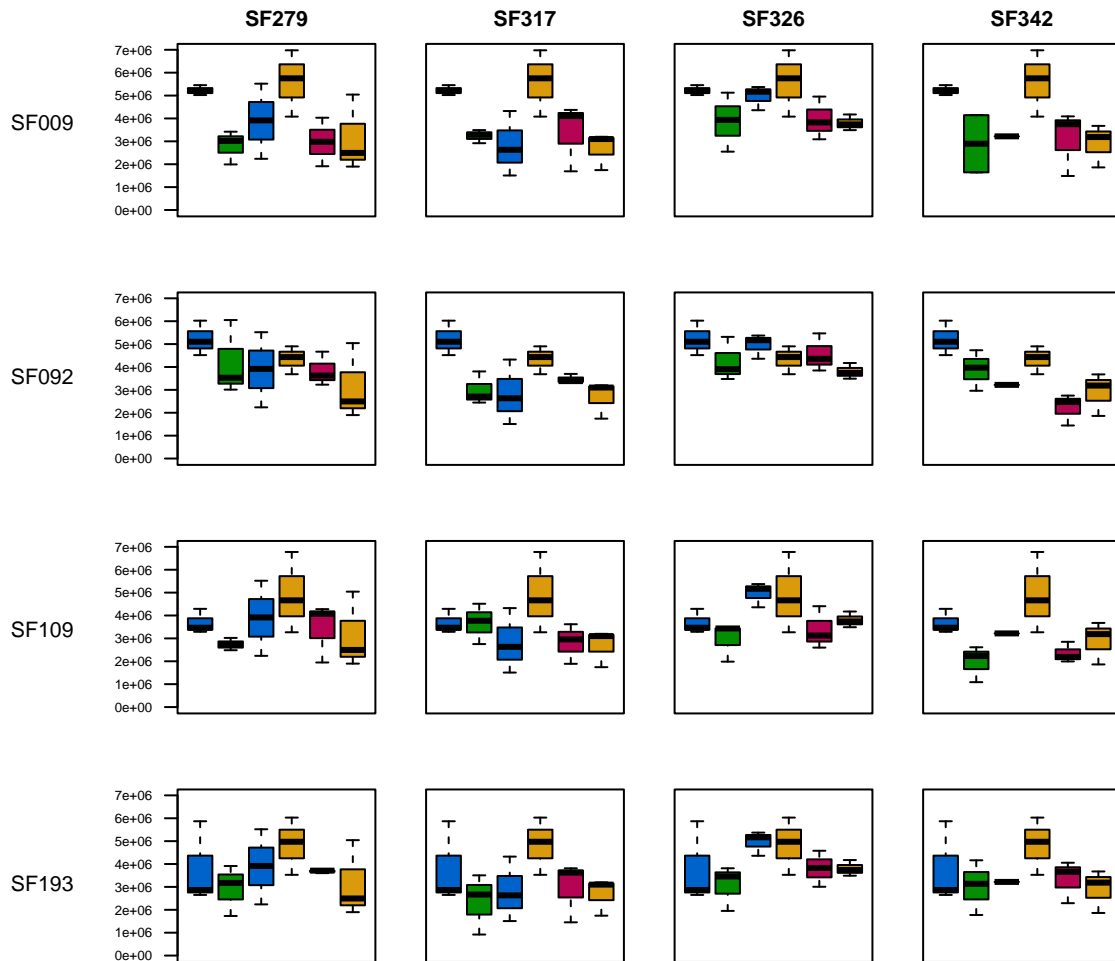

HanXRQChr10g0305801  
Probable ribosomal protein L6 family

Parents WW  
Parents WD  
Hybrids WW  
Hybrids WD

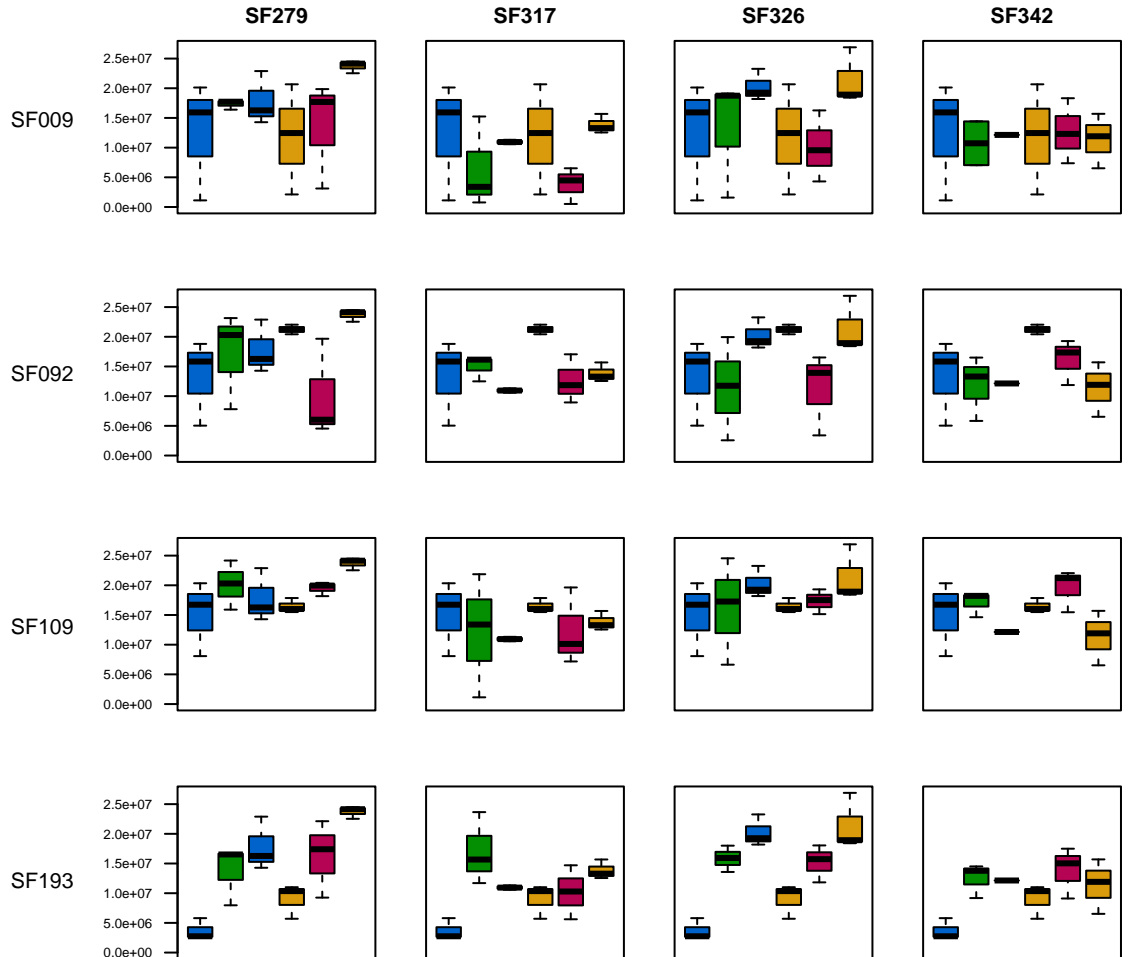

HanXRQChr13g0396501  
Probable protein SEC13 homolog

Parents WW  
Parents WD  
Hybrids WW  
Hybrids WD

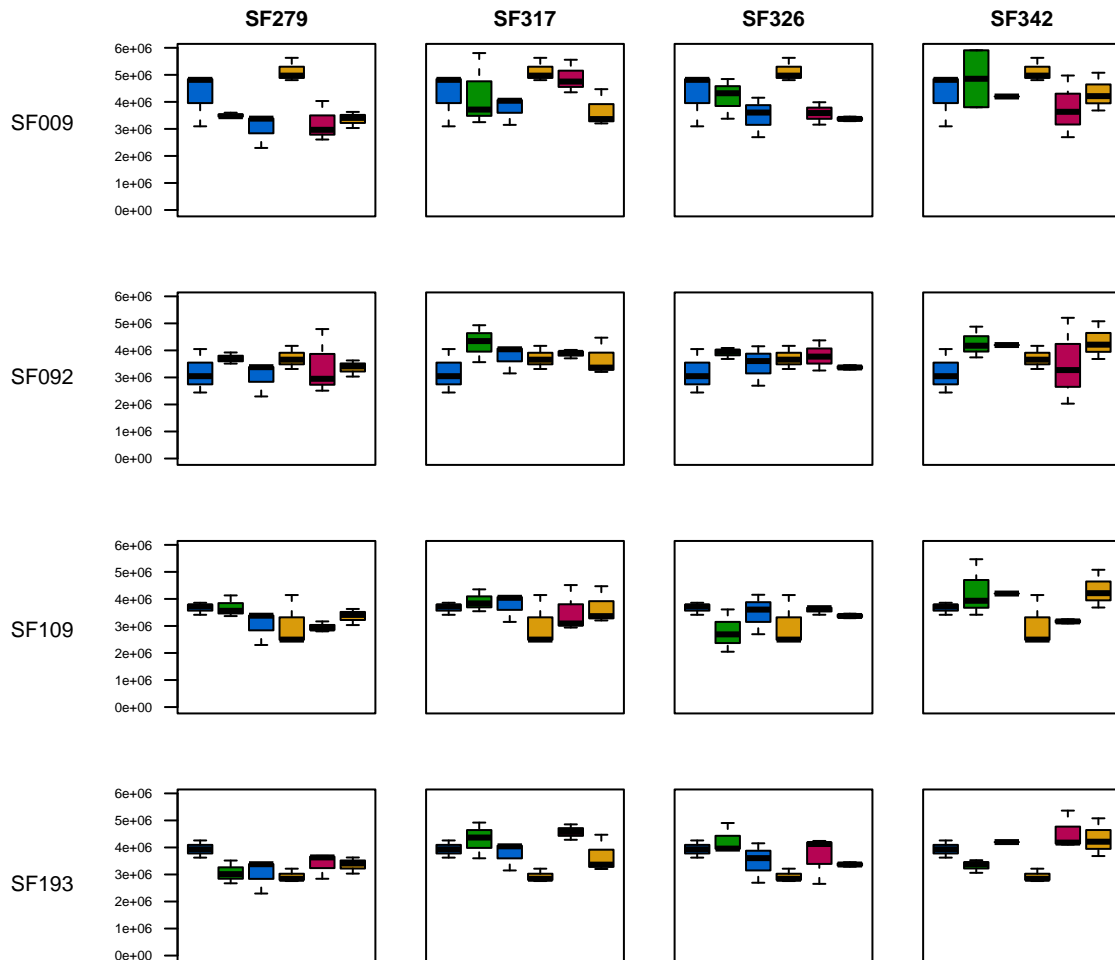

HanXRQChr06g0177121  
Putative nascent polypeptide-associated  
complex subunit alpha

Parents WW  
Parents WD  
Hybrids WW  
Hybrids WD

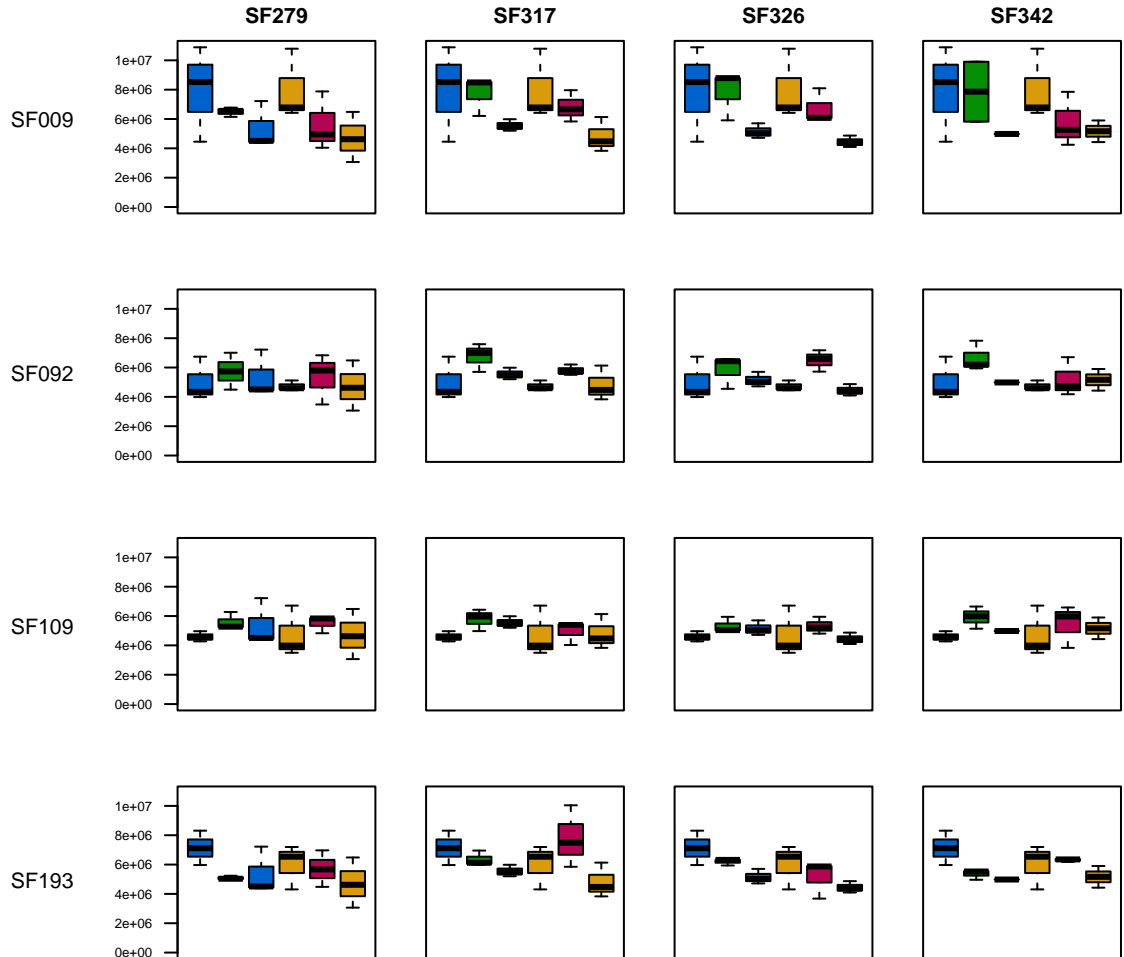

HanXRQChr13g0408441  
Probable heat shock protein 81-3

Parents WW  
Parents WD  
Hybrids WW  
Hybrids WD

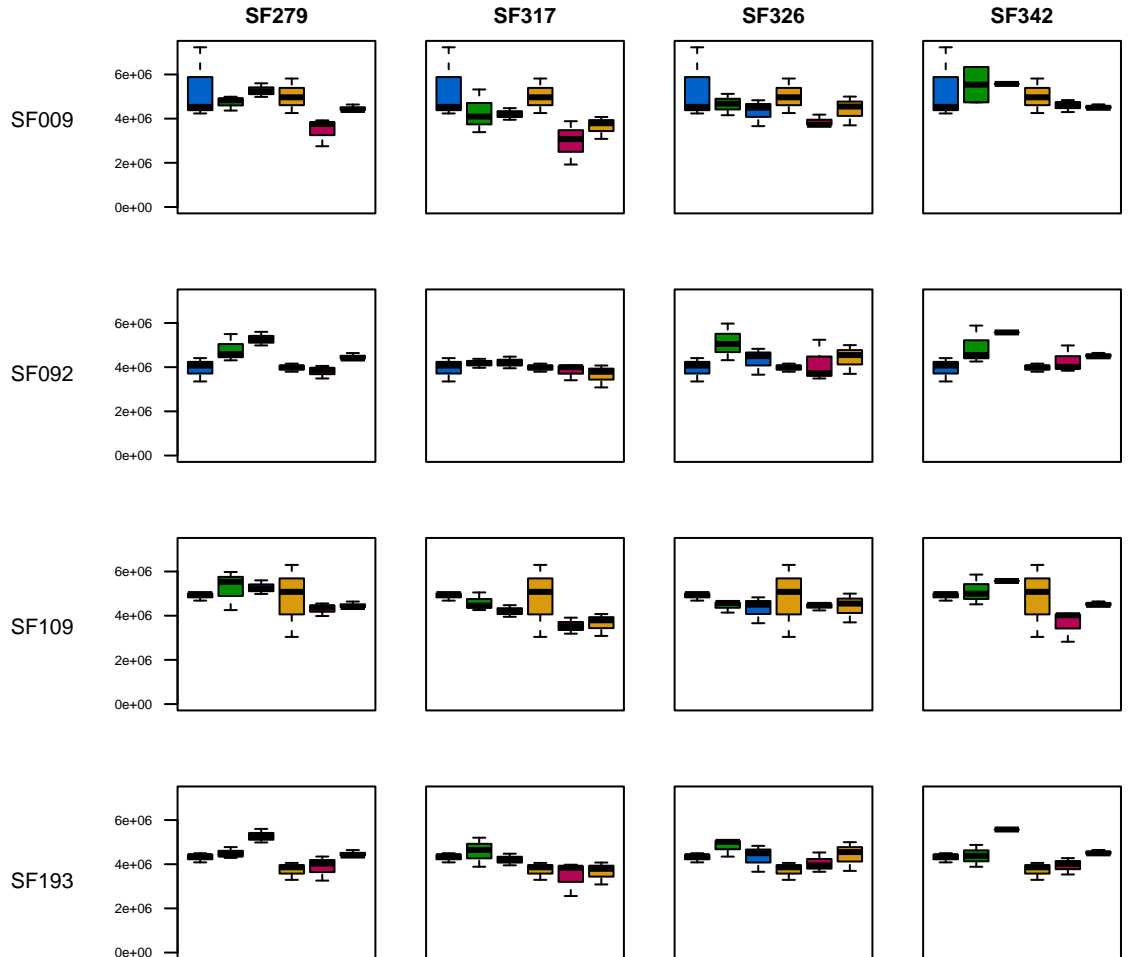



HanXRQChr09g0249701  
Probable chorismate synthase 1,  
chloroplastic

Parents WW  
Parents WD  
Hybrids WW  
Hybrids WD

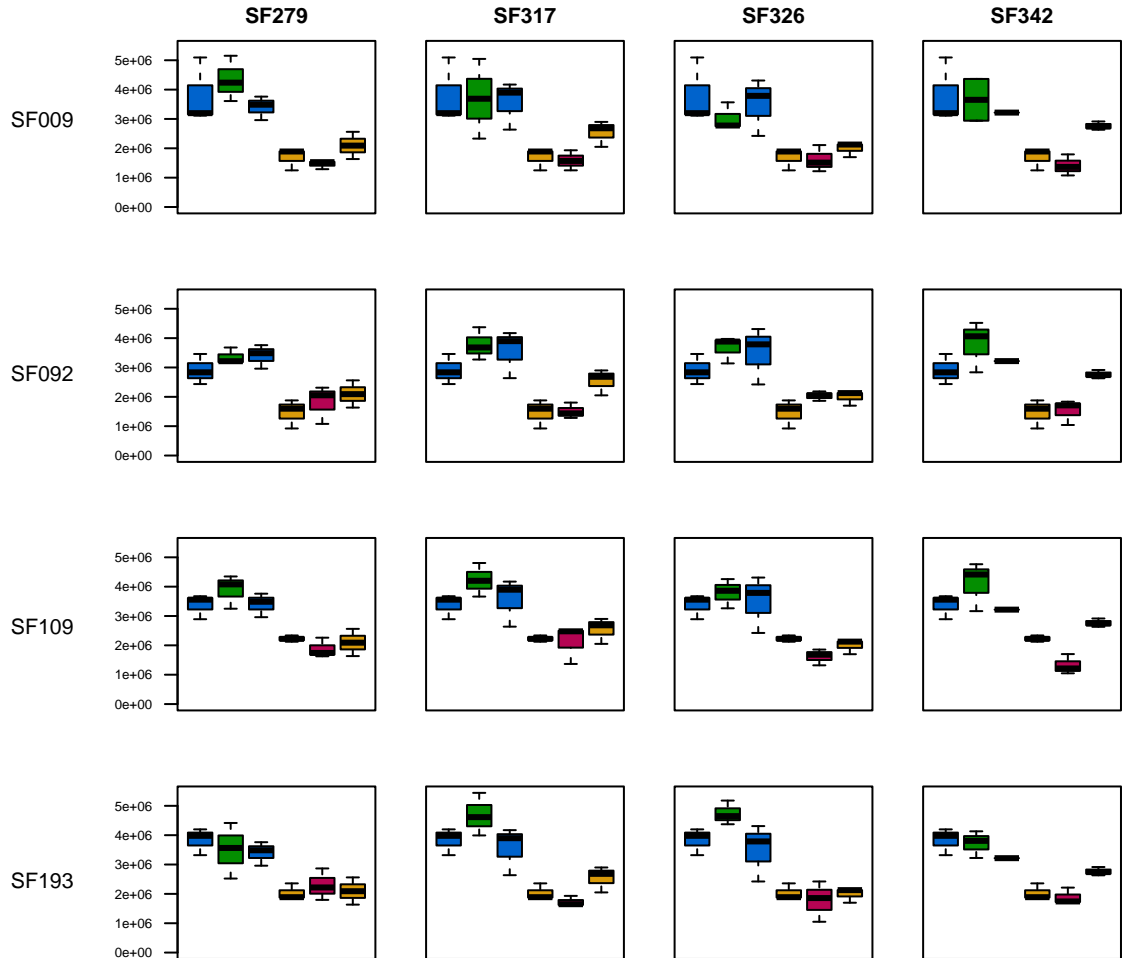

HanXRQChr05g0160651  
Putative photosystem II PsbR

- Parents WW
- Parents WD
- Hybrids WW
- Hybrids WD

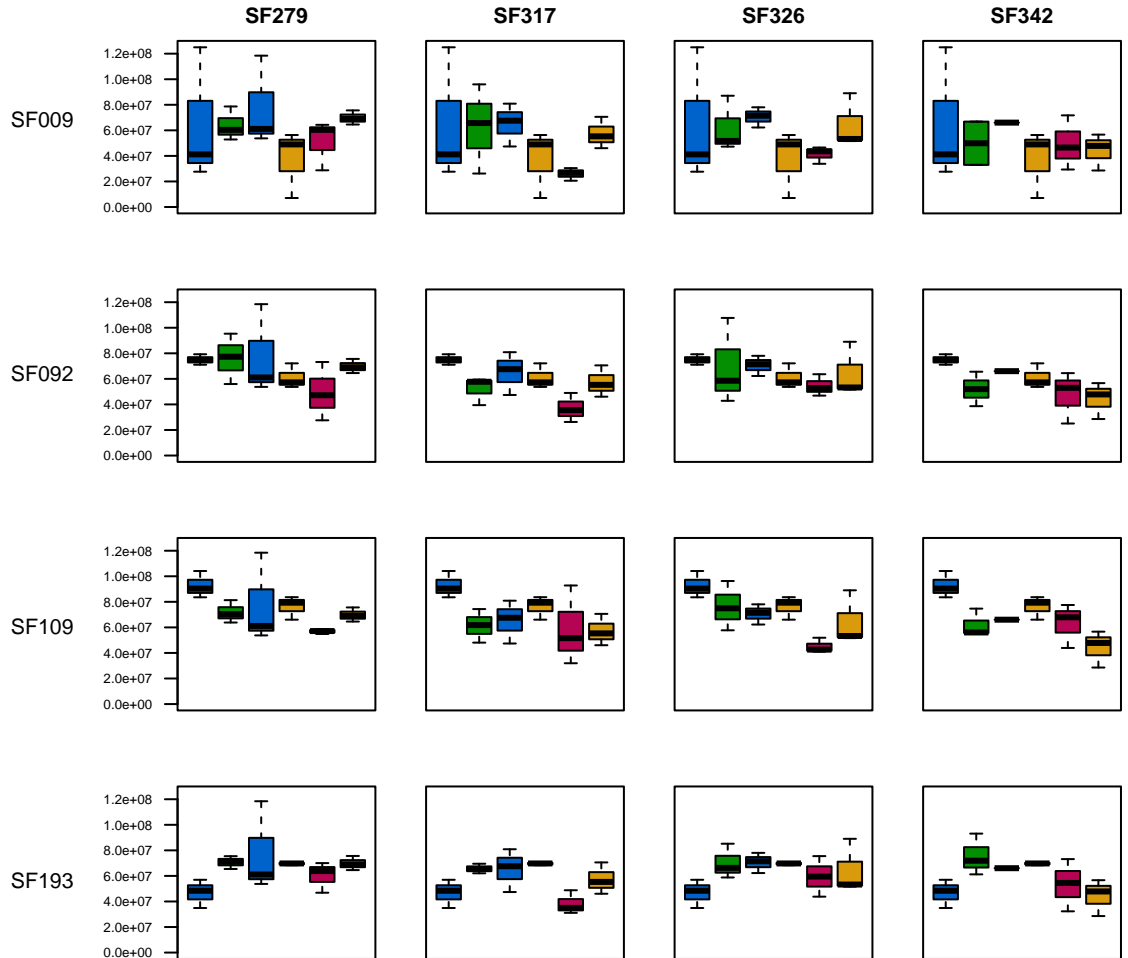

HanXRQChr03g0084481  
Probable calcium-dependent  
lipid-binding (CaLB domain) family protein

Parents WW  
Parents WD  
Hybrids WW  
Hybrids WD

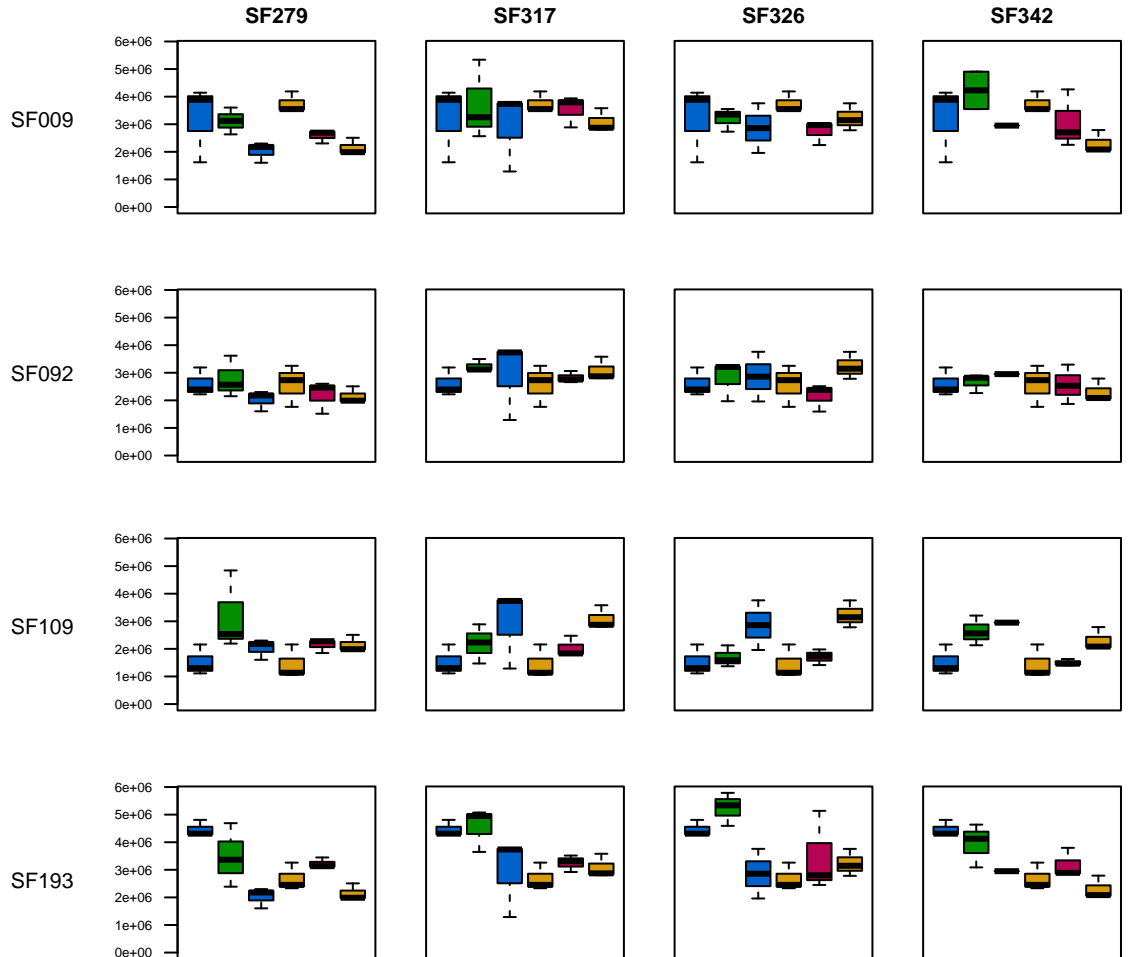

HanXRQChr11g0328581  
Putative glucose/ribitol dehydrogenase

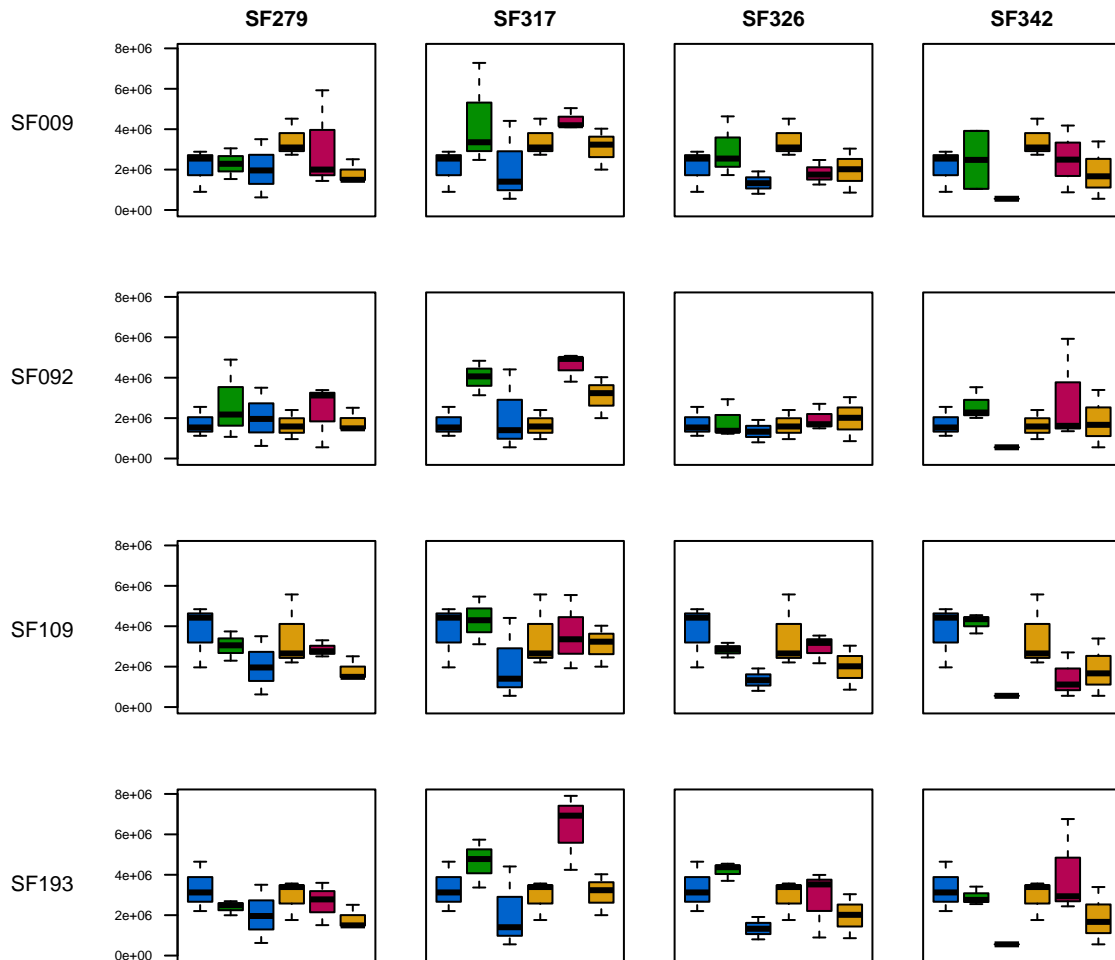

HanXRQChr16g0532531  
Putative transketolase, bacterial-like;  
Transketolase, C-terminal/Pyruvate-ferredoxin

Parents WW  
Parents WD  
Hybrids WW  
Hybrids WD

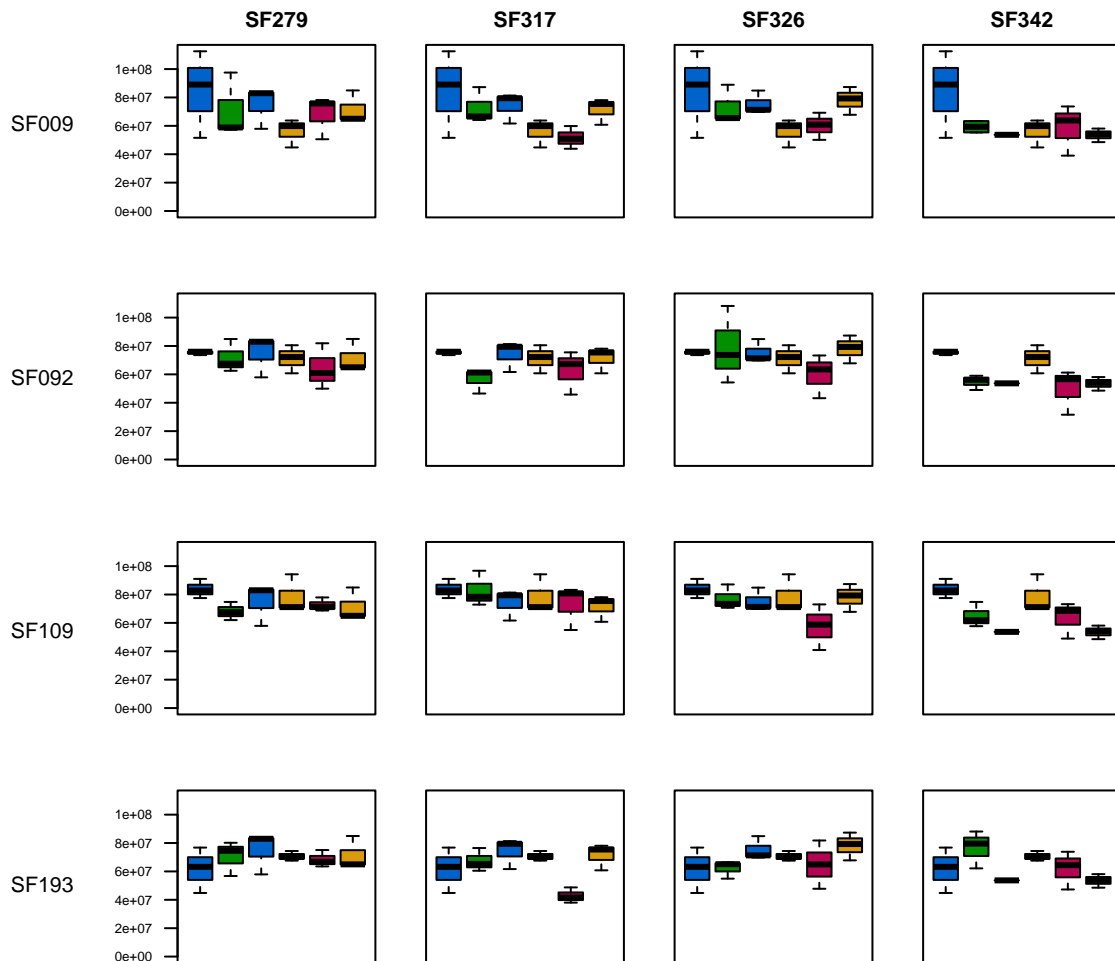

HanXRQChr15g0480141  
 Probable pentatricopeptide (PPR)  
 repeat-containing protein

Parents WW  
 Parents WD  
 Hybrids WW  
 Hybrids WD

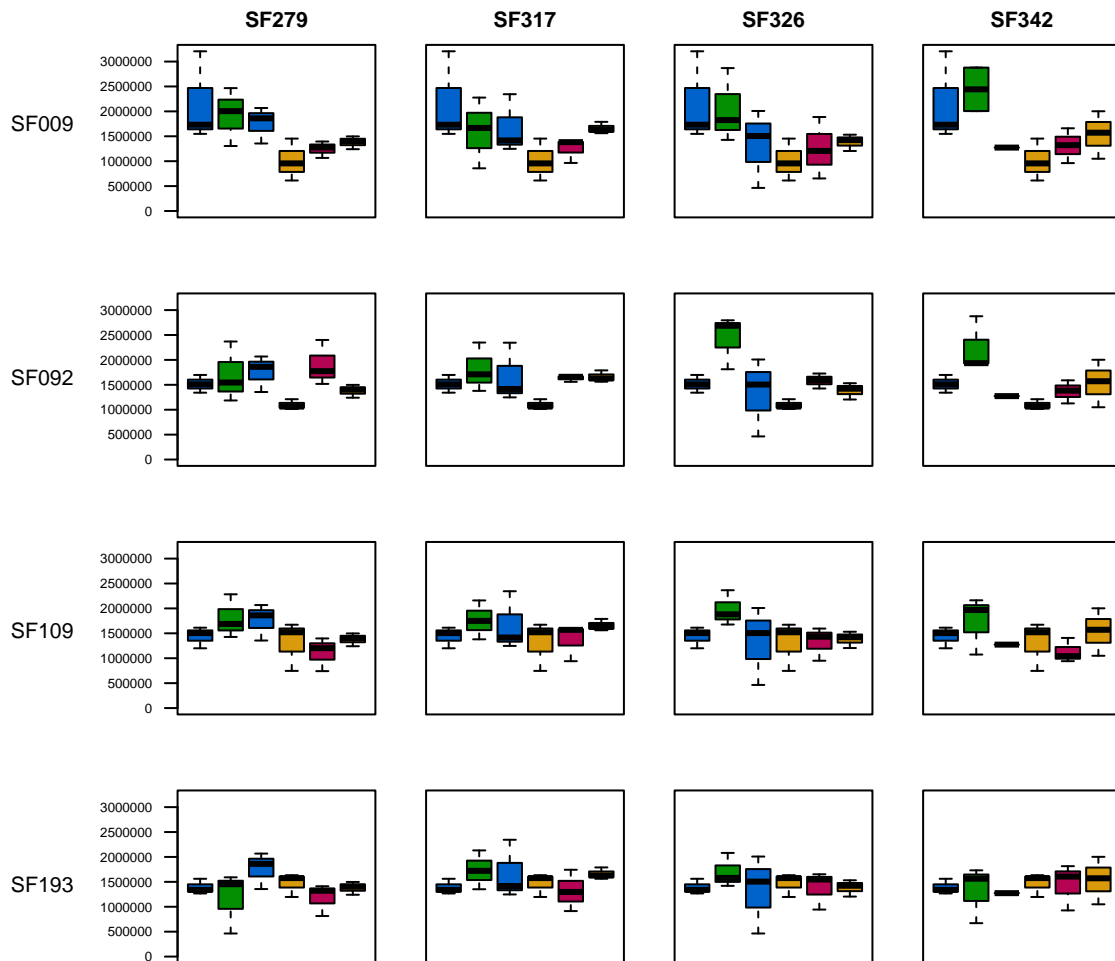

HanXRQChr03g0077251  
Probable cytochrome b6-f complex  
iron-sulfur subunit, chloroplastic

Parents WW  
Parents WD  
Hybrids WW  
Hybrids WD

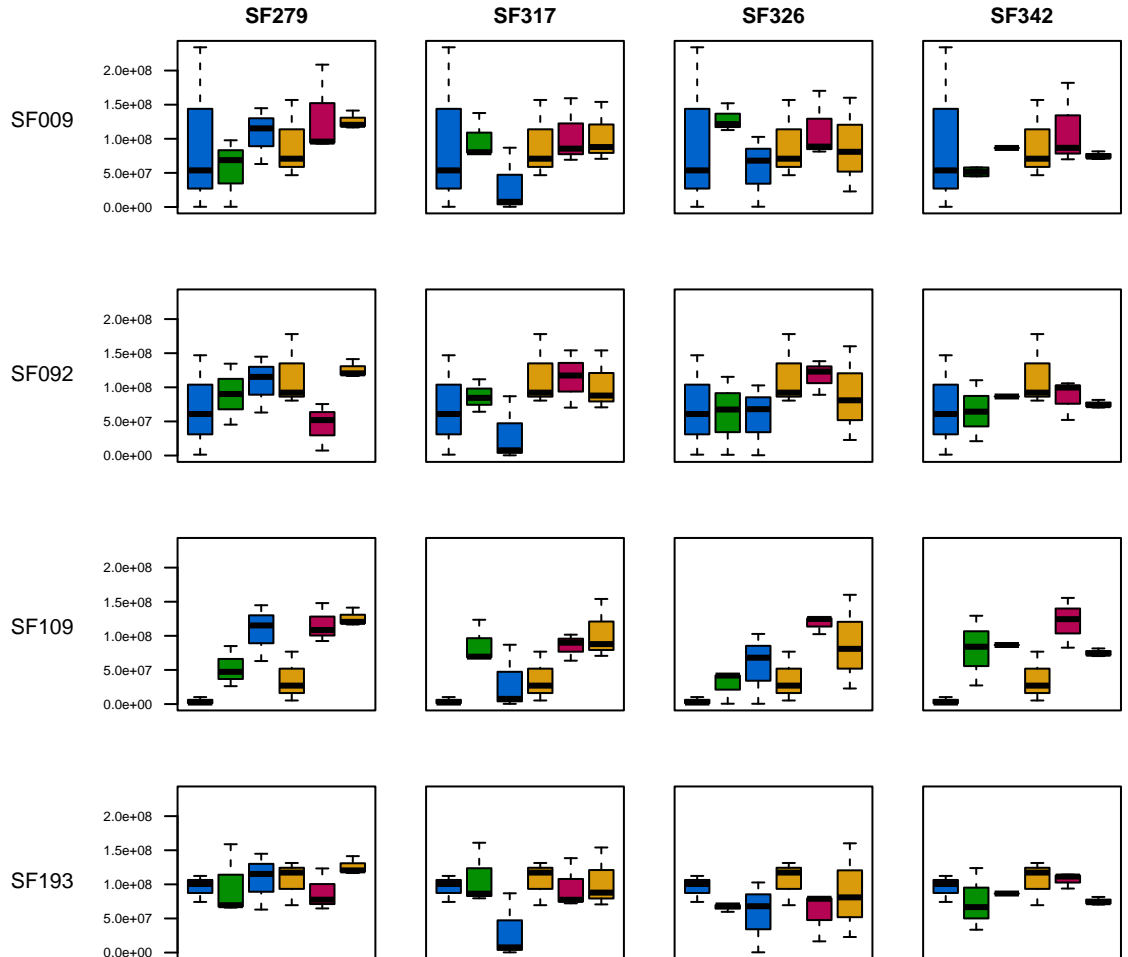

HanXRQChr15g0495271  
Putative 14-3-3 protein; 14-3-3  
protein, conserved site; 14-3-3 domain

Parents WW  
Parents WD  
Hybrids WW  
Hybrids WD

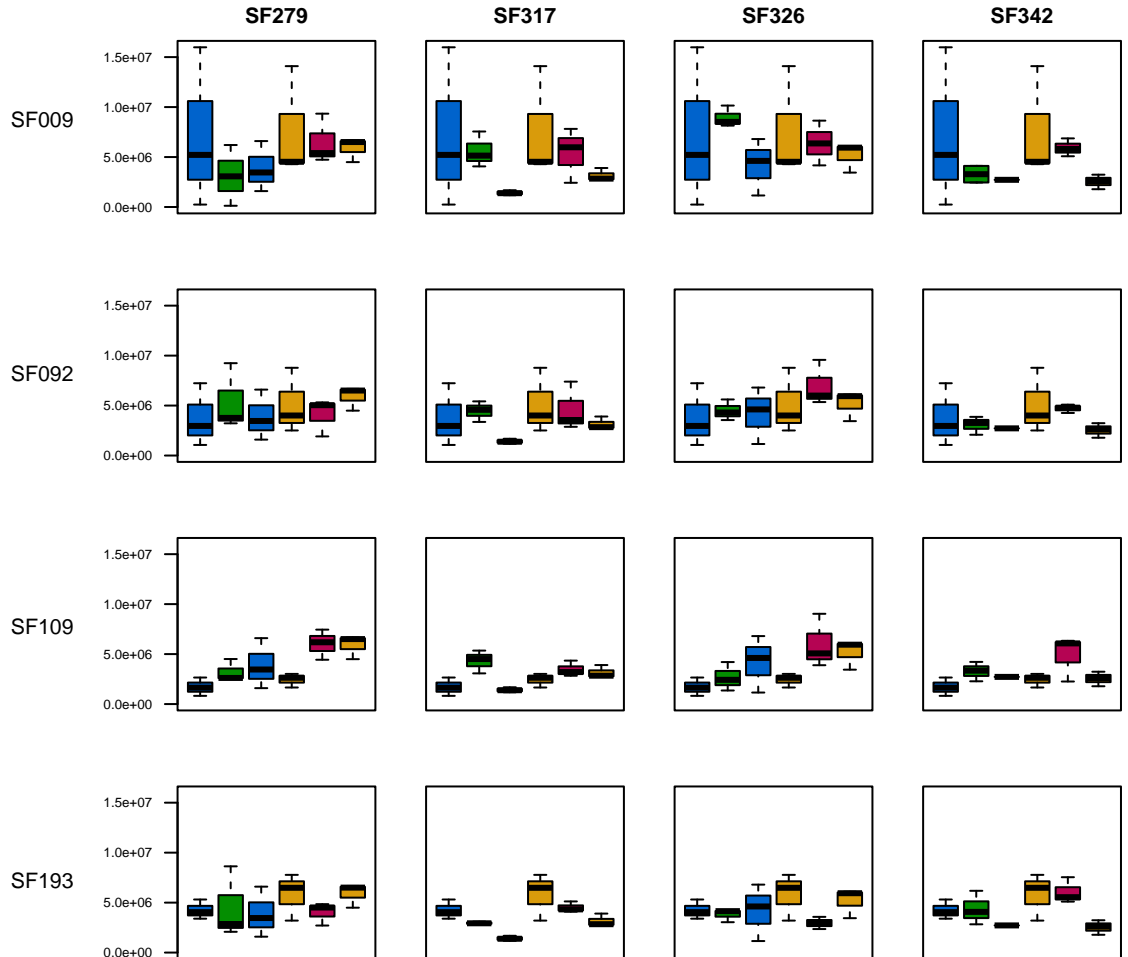



HanXRQChr10g0293191  
Probable  
beta-xylidase/alpha-L-arabinofuranosid

Parents WW  
Parents WD  
Hybrids WW  
Hybrids WD

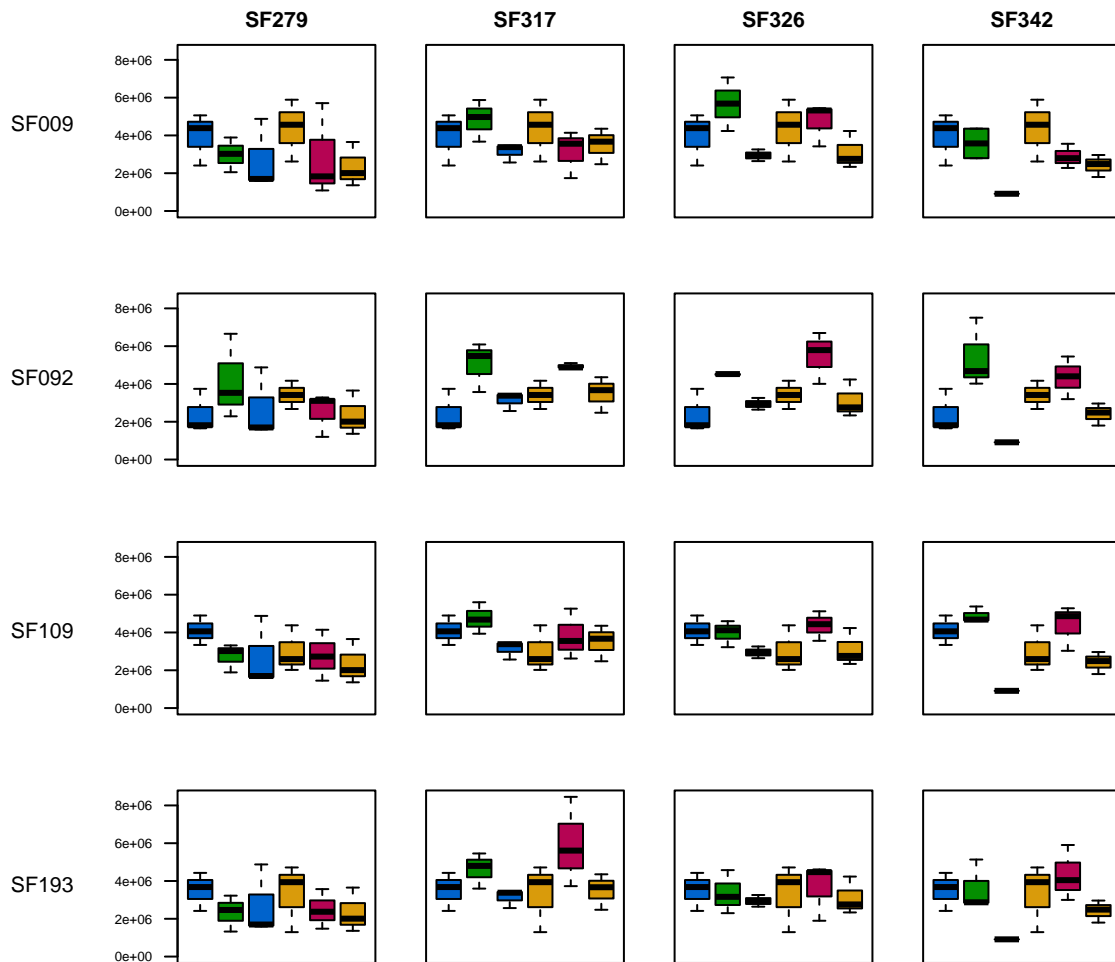

HanXRQChr02g0048101  
Probable mog1/PsbP/DUF1795-like  
photosystem II reaction center PsbP family

Parents WW  
Parents WD  
Hybrids WW  
Hybrids WD

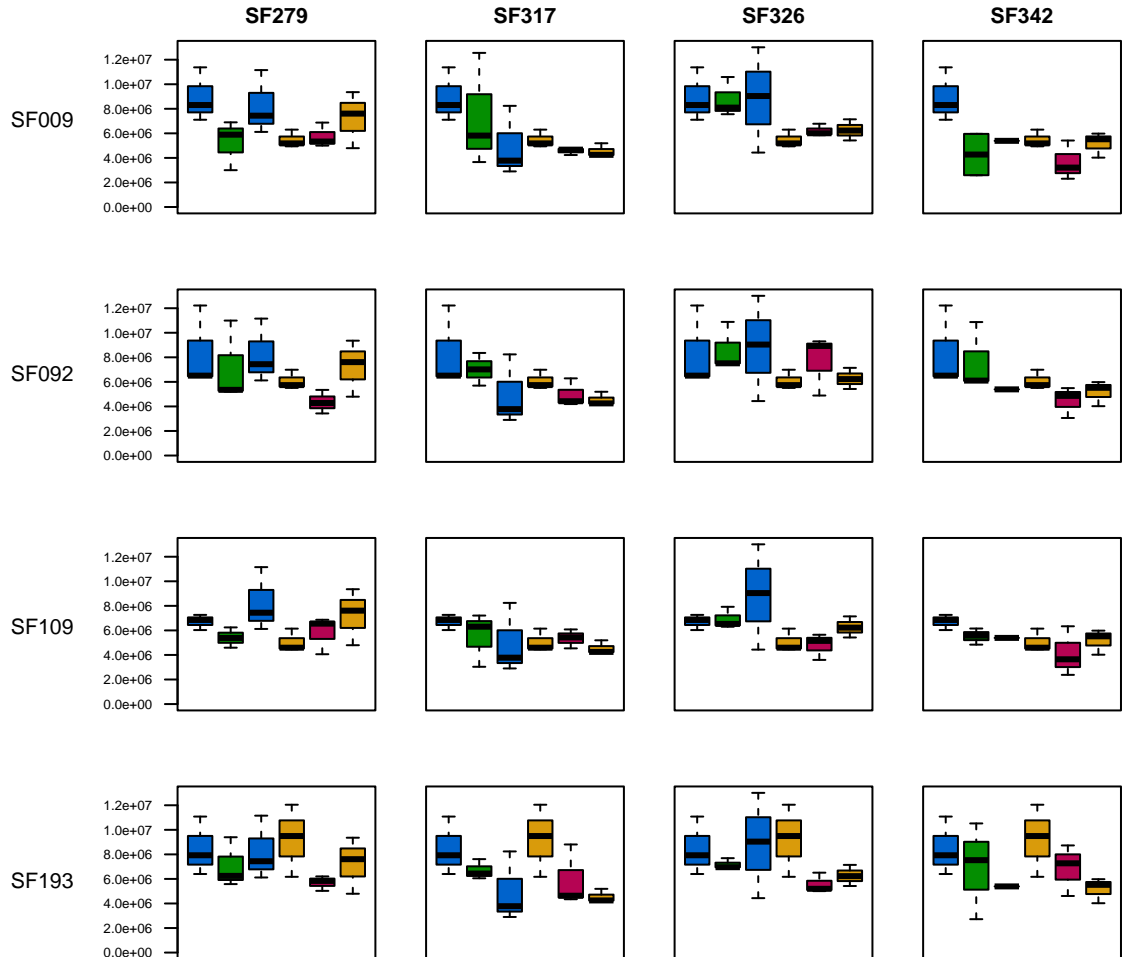

HanXRQChr04g0103861  
 Probable formate dehydrogenase,  
 mitochondrial

Parents WW  
 Parents WD  
 Hybrids WW  
 Hybrids WD

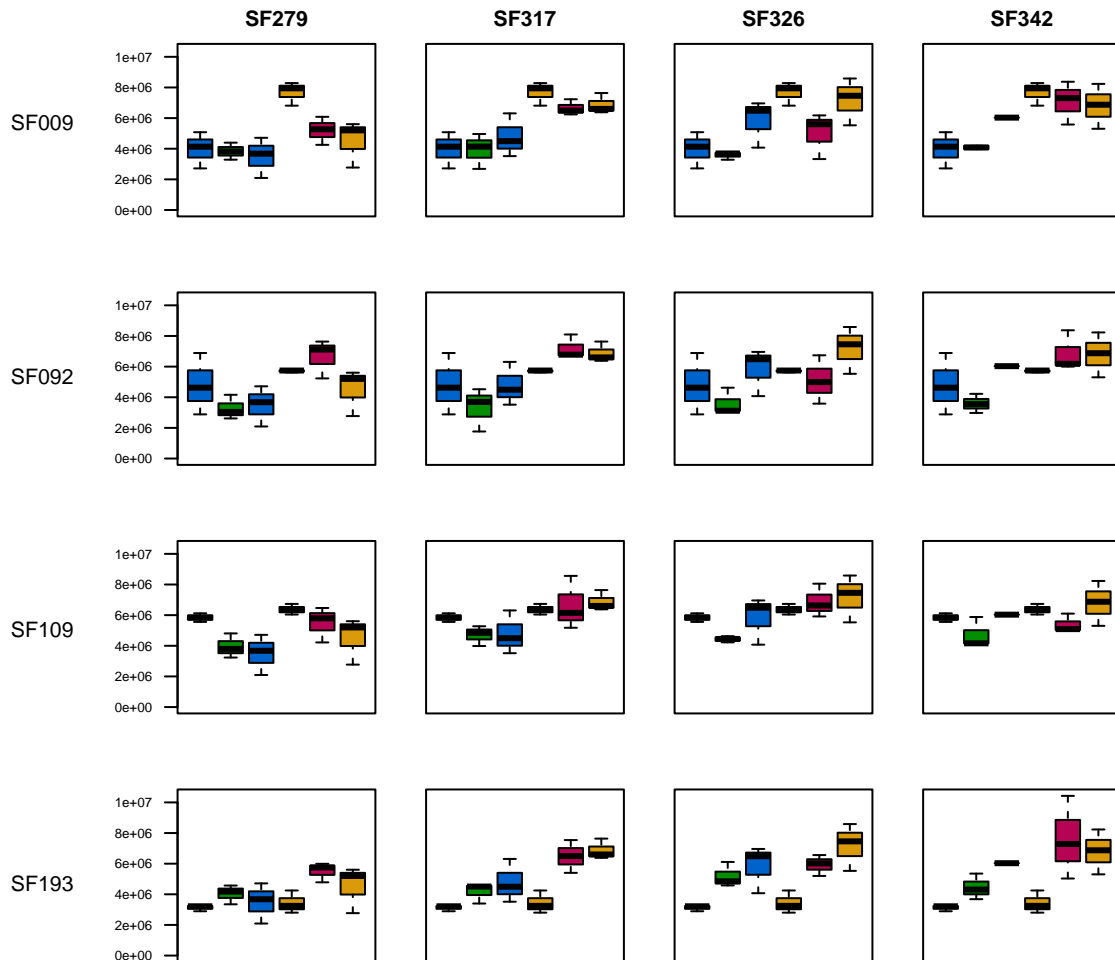

HanXRQChr15g0497361  
Probable phytoene dehydrogenase,  
chloroplastic/chromoplastic

Parents WW  
Parents WD  
Hybrids WW  
Hybrids WD

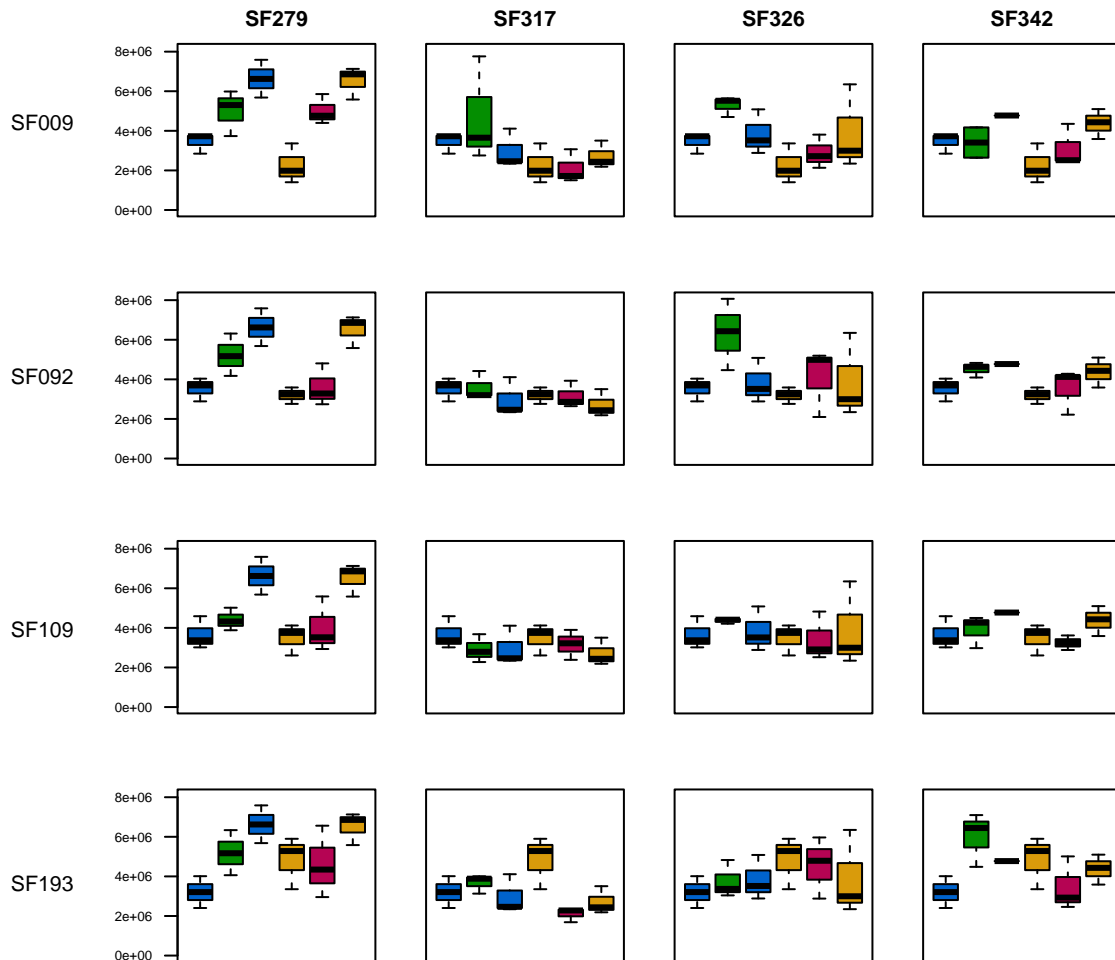

HanXRQChr08g0220871  
Putative thioredoxin; Thioredoxin-like  
fold

Parents WW  
Parents WD  
Hybrids WW  
Hybrids WD

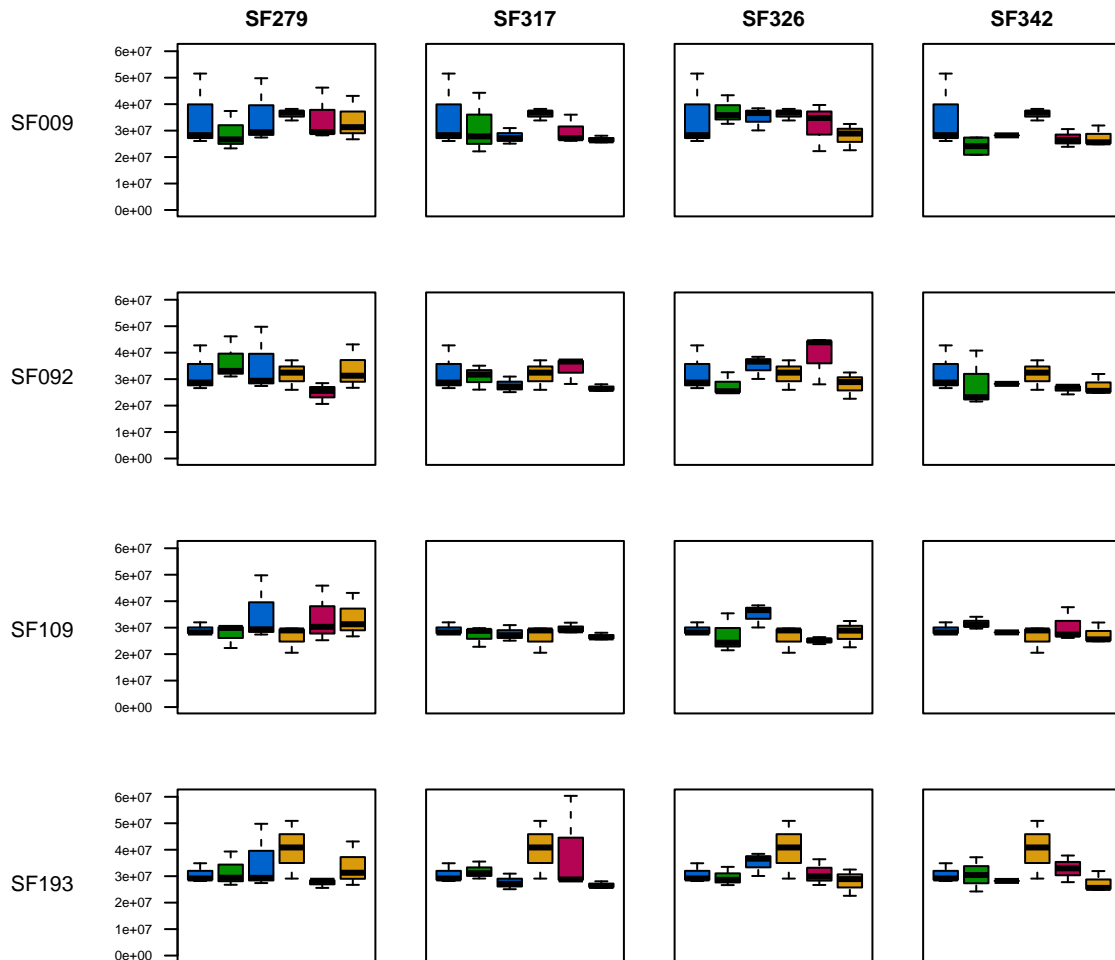

HanXRQChr14g0461411  
Probable BCL-2-associated athanogene 7

Parents WW  
Parents WD  
Hybrids WW  
Hybrids WD

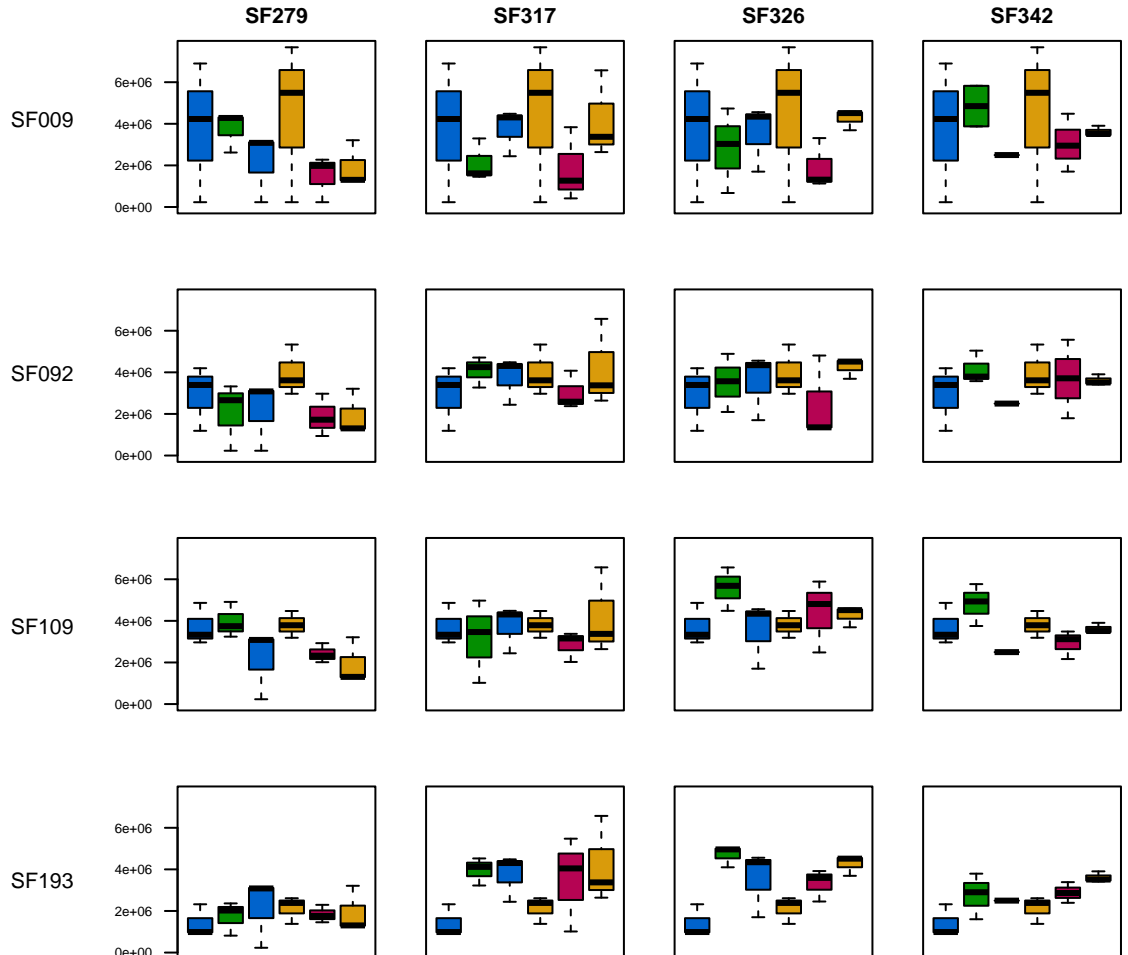

HanXRQChr03g0073261  
Probable alpha/beta-Hydrolases  
superfamily protein

Parents WW  
Parents WD  
Hybrids WW  
Hybrids WD

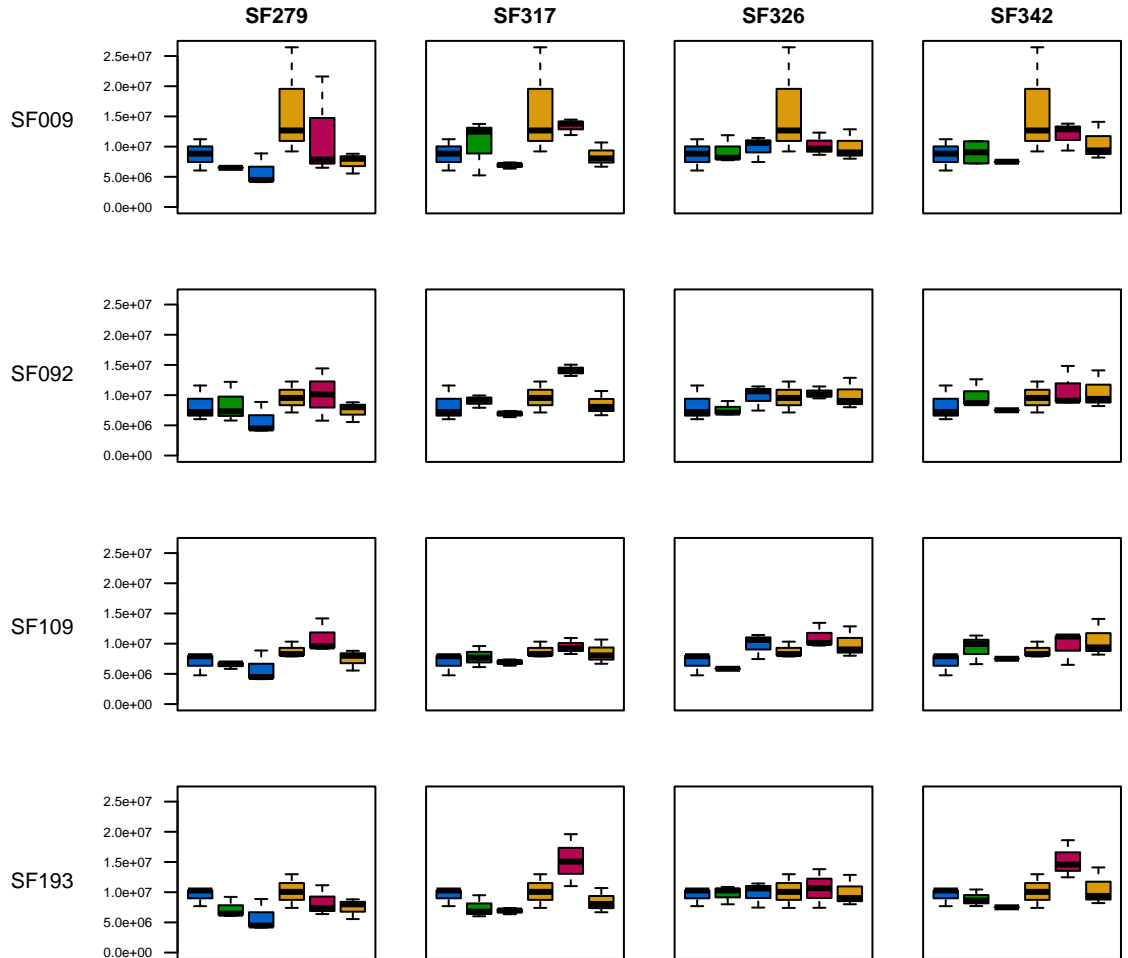

HanXRQChr15g0496591  
 Probable ribulose biphosphate  
 carboxylase/oxygenase activase, chloroplas

Parents WW  
 Parents WD  
 Hybrids WW  
 Hybrids WD

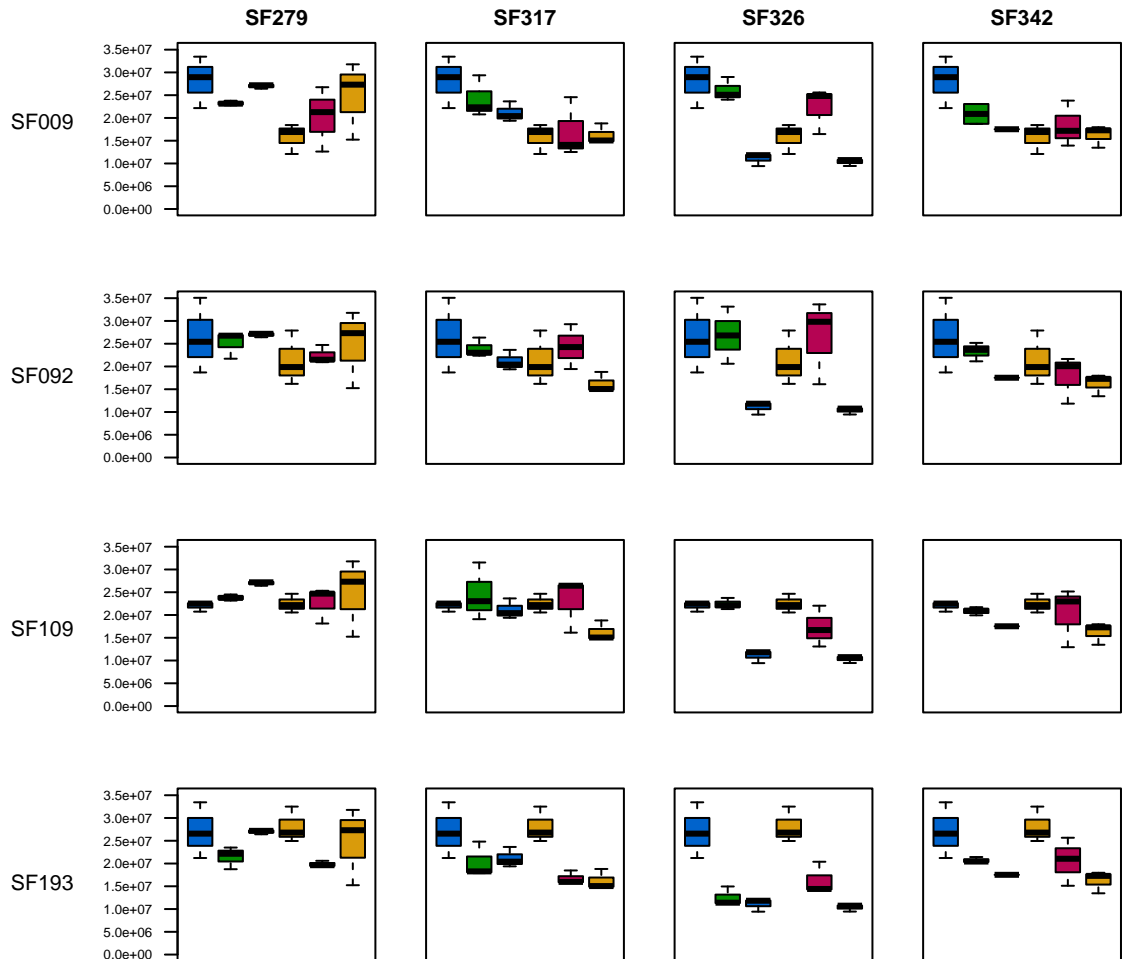



HanXRQChr17g0563441  
Putative nucleotide-binding alpha-beta  
plait domain

Parents WW  
Parents WD  
Hybrids WW  
Hybrids WD

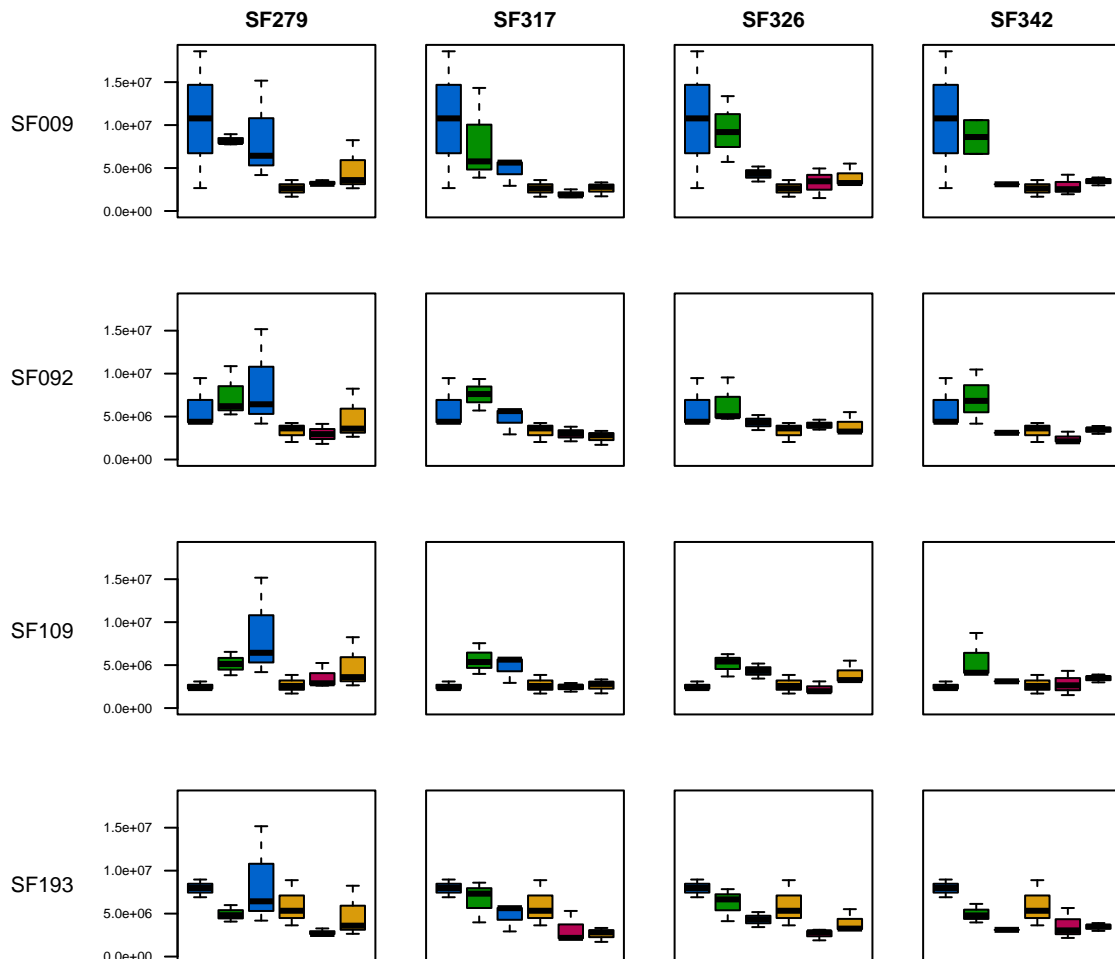

HanXRQChr04g0112791  
Putative zinc finger, CCHC-type;  
Nucleic acid-binding, OB-fold

Parents WW  
Parents WD  
Hybrids WW  
Hybrids WD

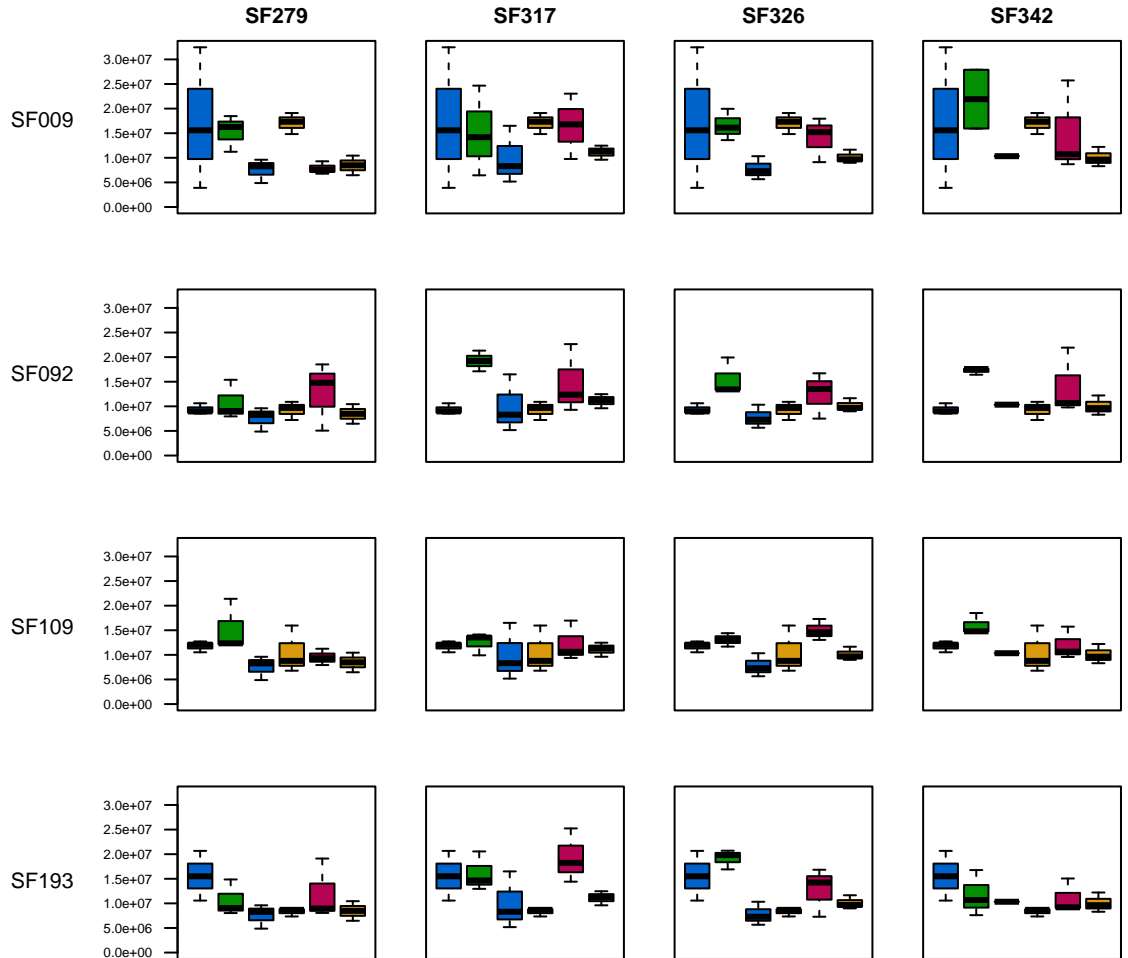

HanXRQChr12g0374381  
Putative alpha-hydroxy acid  
dehydrogenase, FMN-dependent; Aldolase

Parents WW  
Parents WD  
Hybrids WW  
Hybrids WD

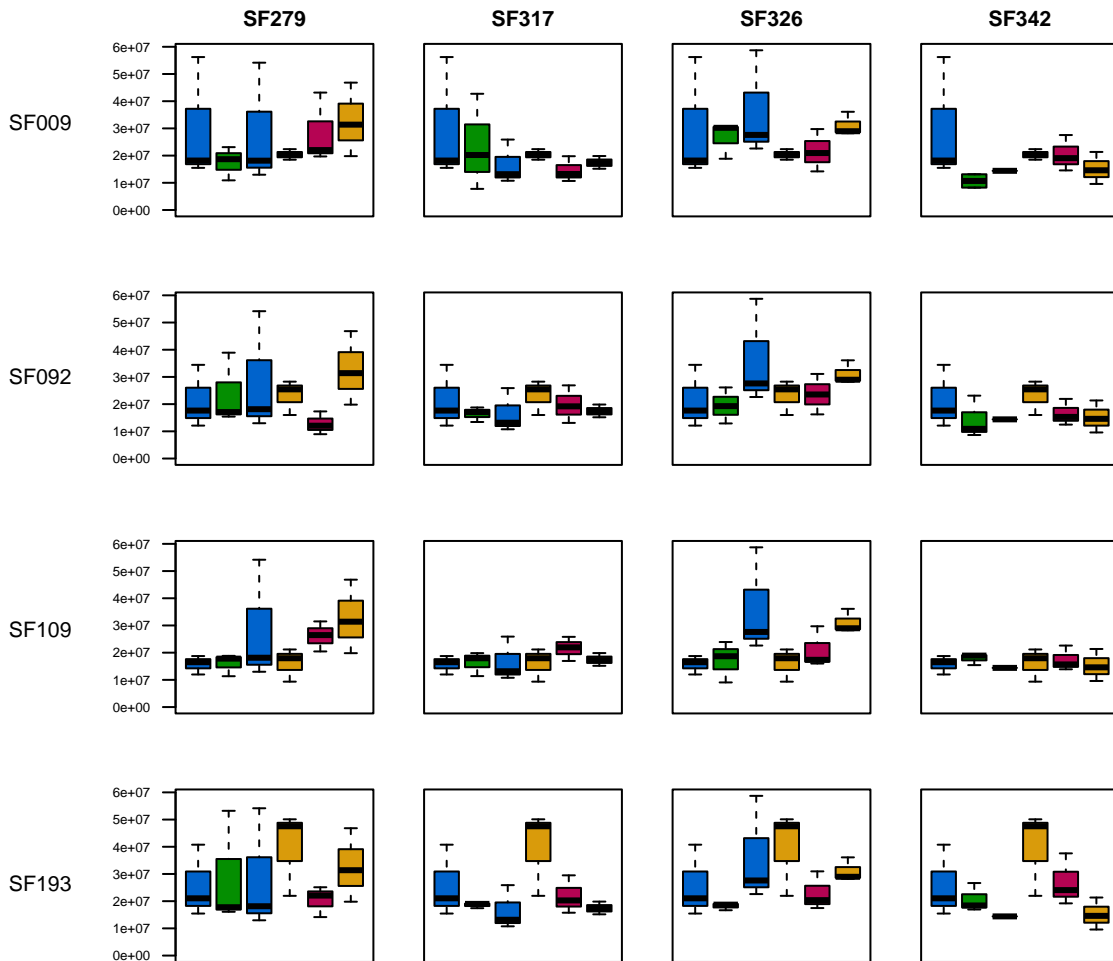

HanXRQChr17g0564321  
Probable 3-ketoacyl-acyl carrier  
protein synthase I

Parents WW  
Parents WD  
Hybrids WW  
Hybrids WD

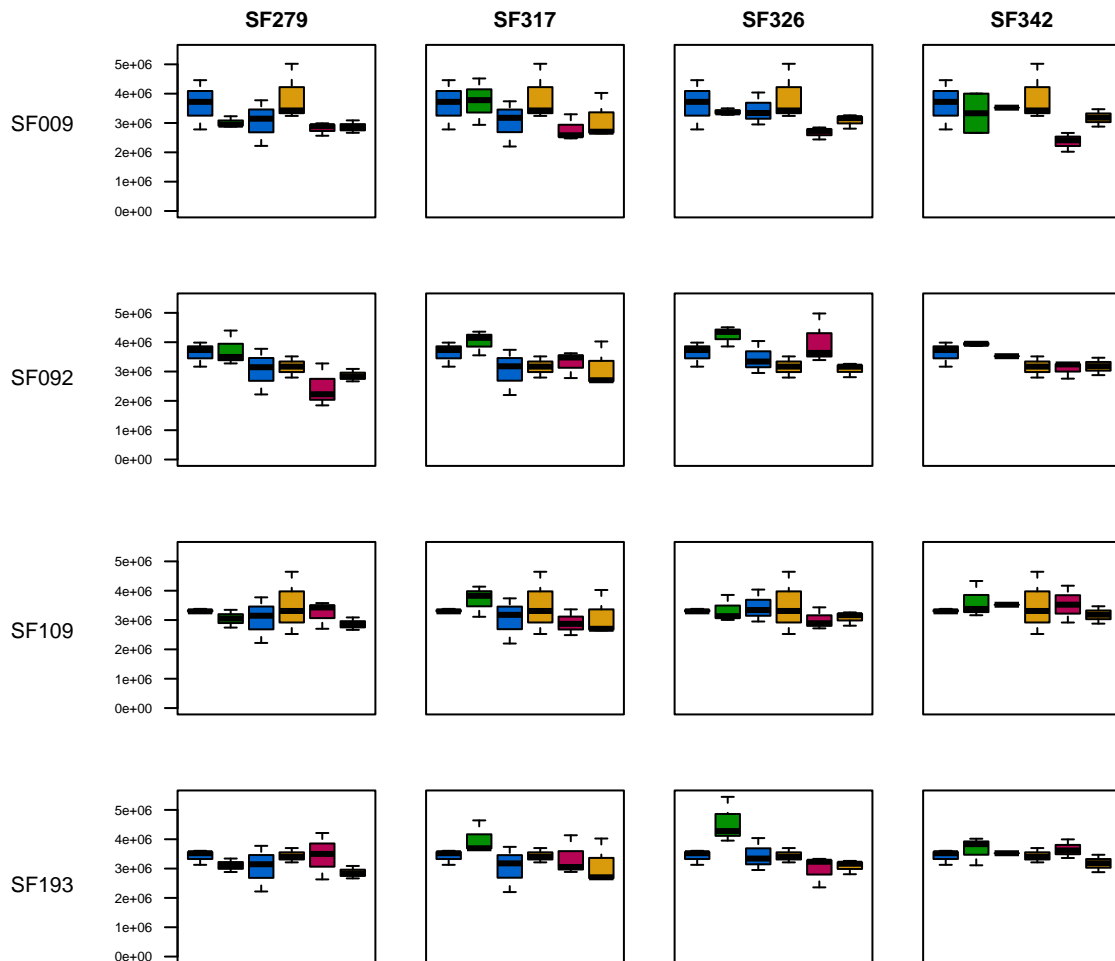

HanXRQChr08g0223071  
Probable peptide methionine sulfoxide  
reductase

Parents WW  
Parents WD  
Hybrids WW  
Hybrids WD

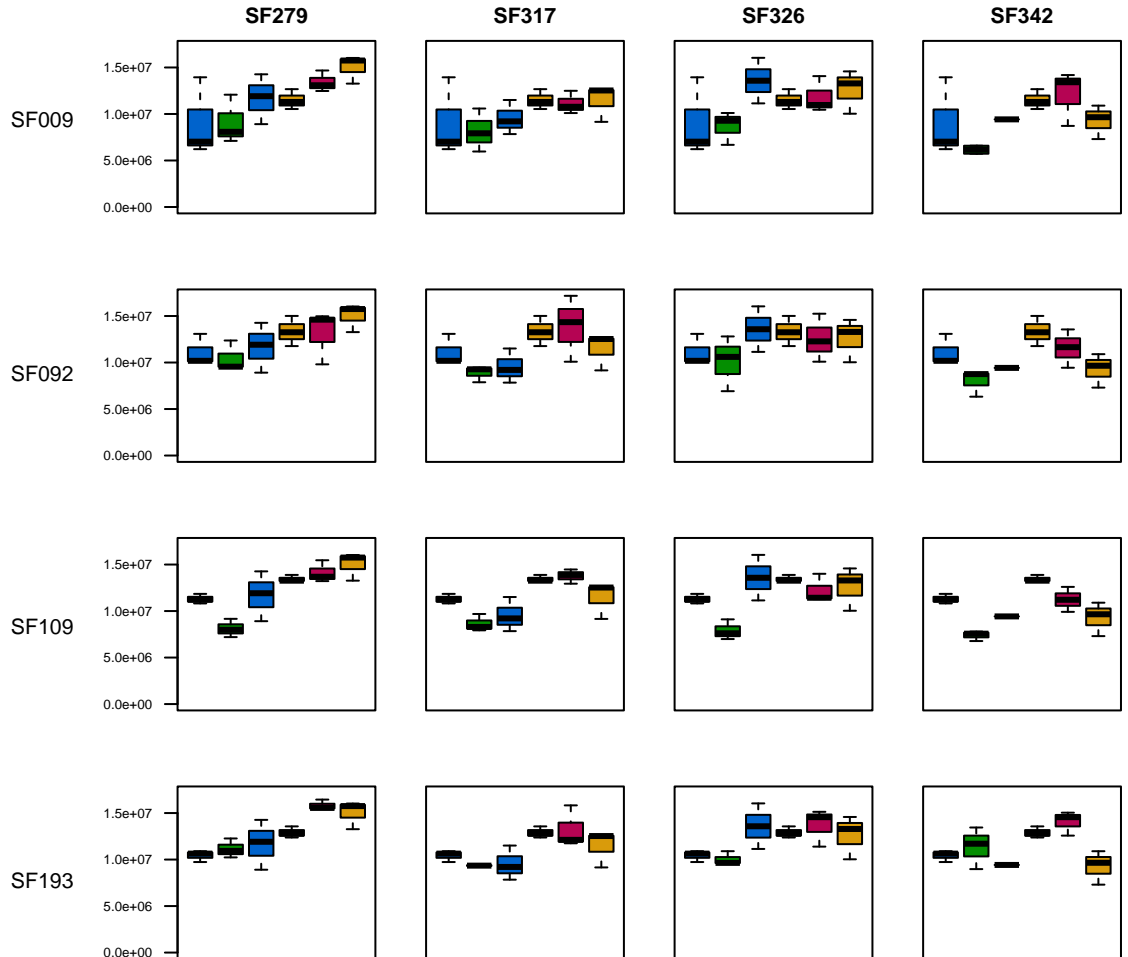

HanXRQChr16g0502051  
Putative cyclophilin-type  
peptidyl-prolyl cis-trans isomerase domain

Parents WW  
Parents WD  
Hybrids WW  
Hybrids WD

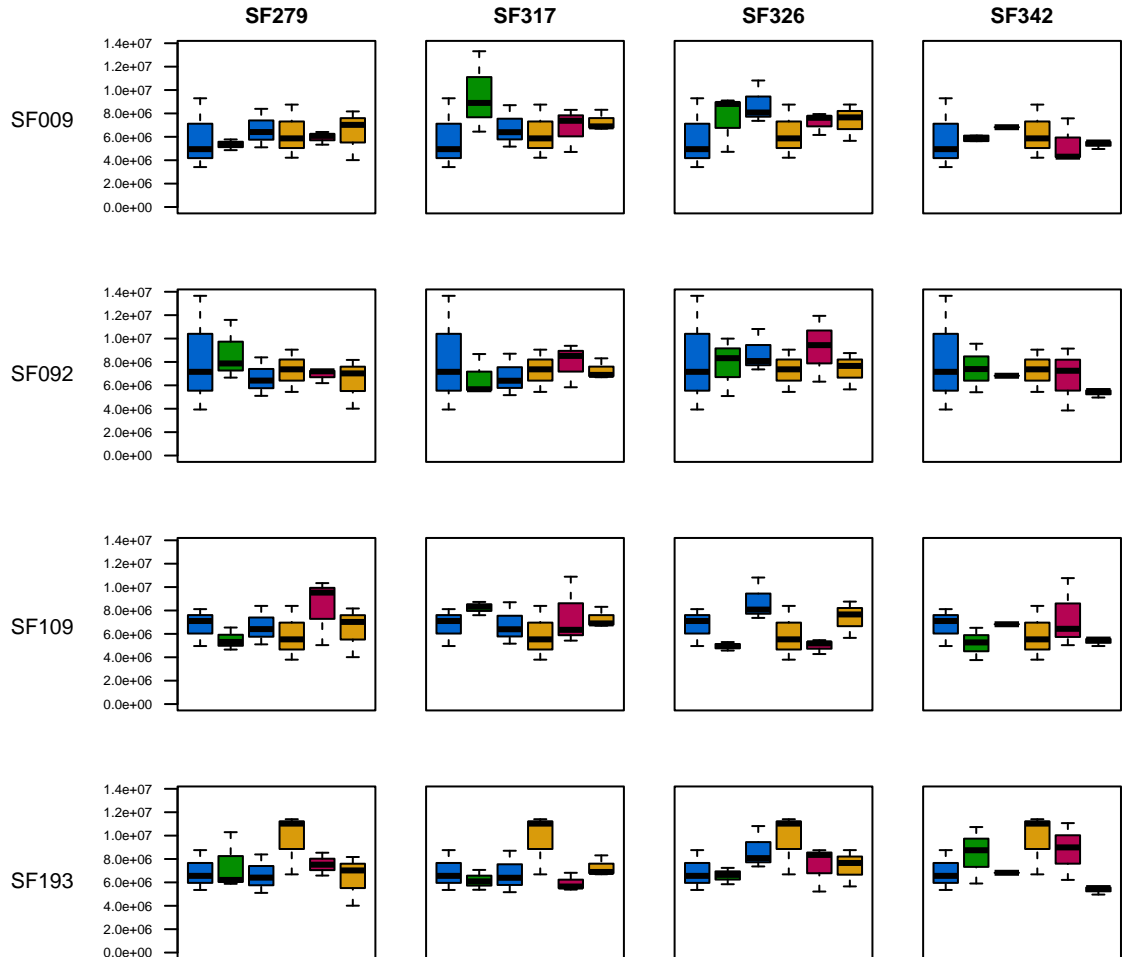

HanXRQChr13g0400041  
Probable embryonic protein DC-8

- Parents WW
- Parents WD
- Hybrids WW
- Hybrids WD

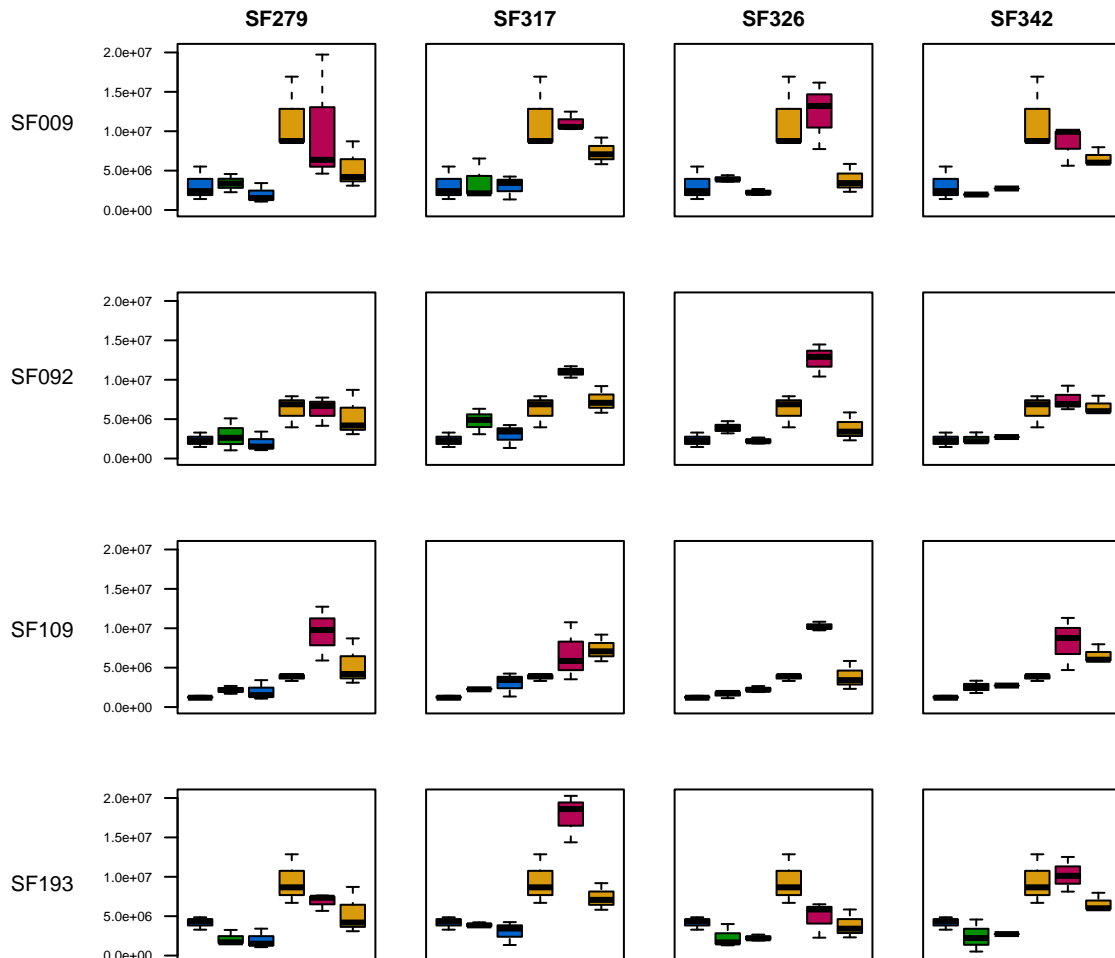

HanXRQChr01g0006731  
 Probable CONTAINS InterPro DOMAIN/s:  
 Uncharacterised protein family UPF0041 (Ir

■ Parents WW  
 ■ Parents WD  
 ■ Hybrids WW  
 ■ Hybrids WD

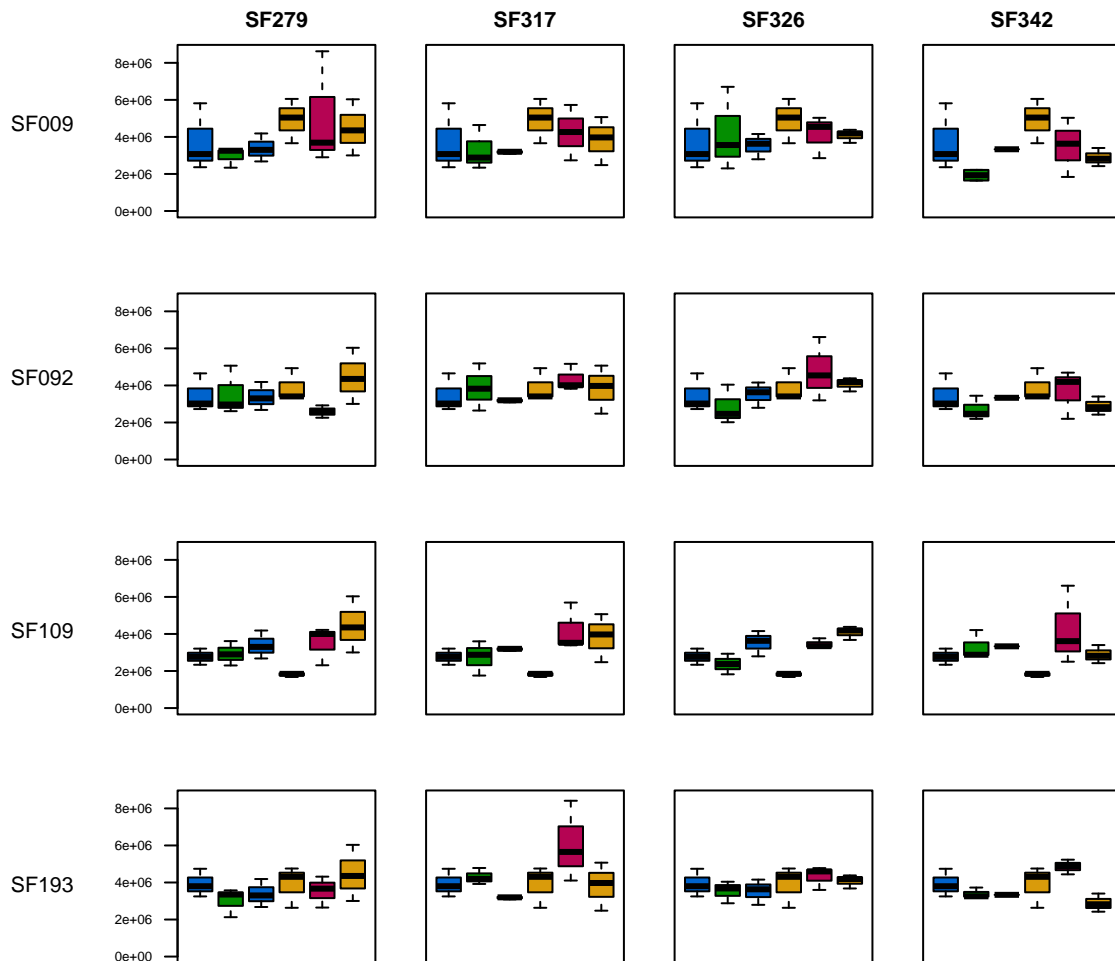



HanXRQChr02g0036611  
Putative cellular retinaldehyde  
binding/alpha-tocopherol transport; GOLD

Parents WW  
Parents WD  
Hybrids WW  
Hybrids WD

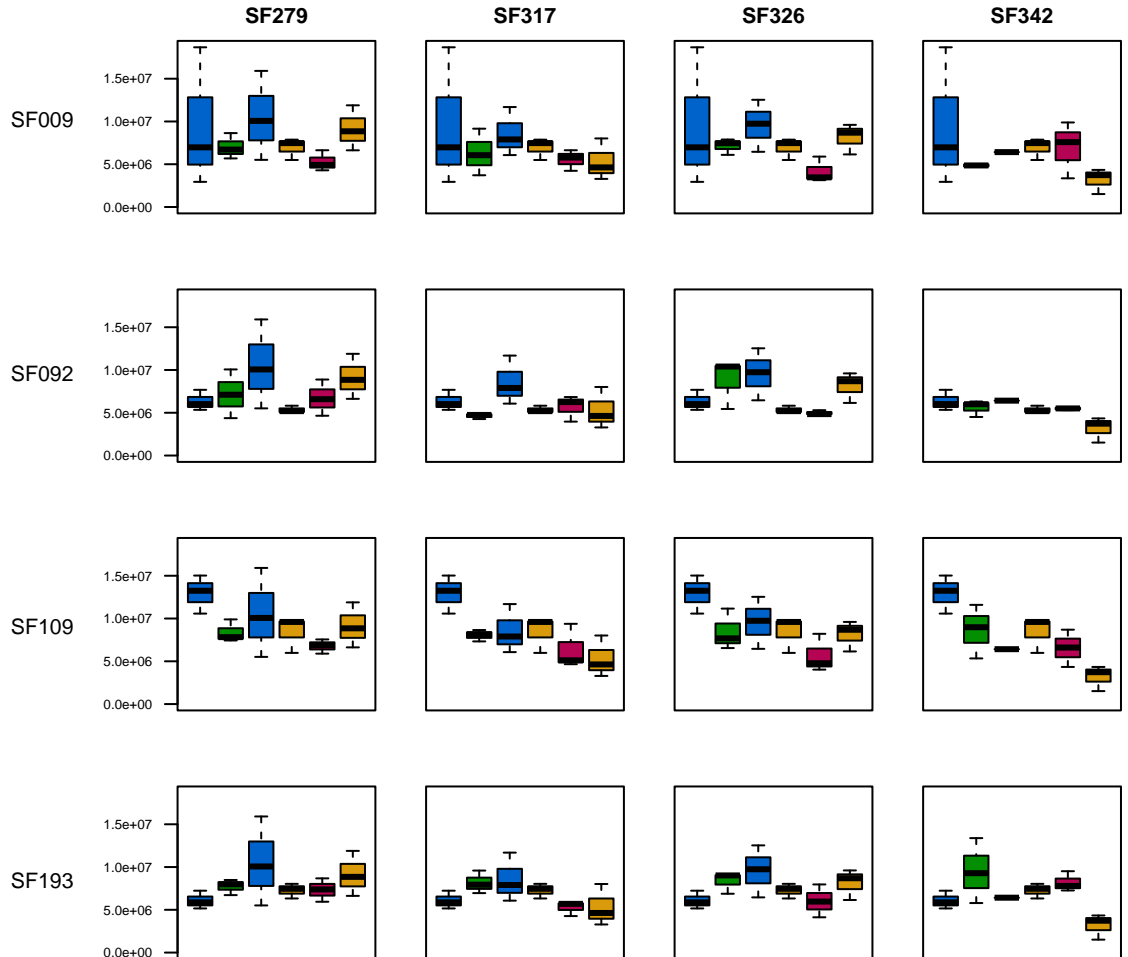

HanXRQChr06g0173861  
Probable glycine dehydrogenase  
(decarboxylating), mitochondrial

Parents WW  
Parents WD  
Hybrids WW  
Hybrids WD

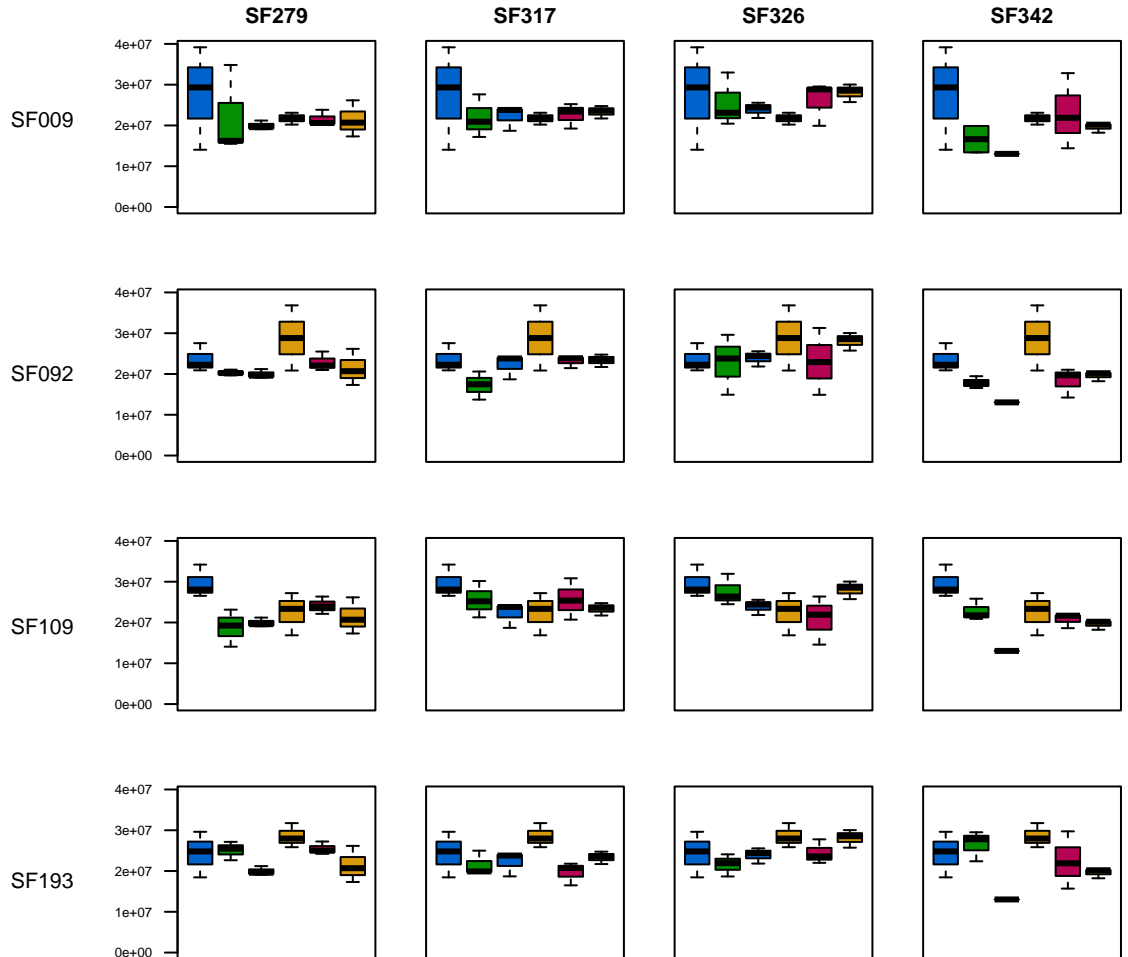

HanXRQChr03g0069341  
 Putative ATPase, AAA-type, core; 26S  
 proteasome subunit P45; P-loop containing

Parents WW  
 Parents WD  
 Hybrids WW  
 Hybrids WD

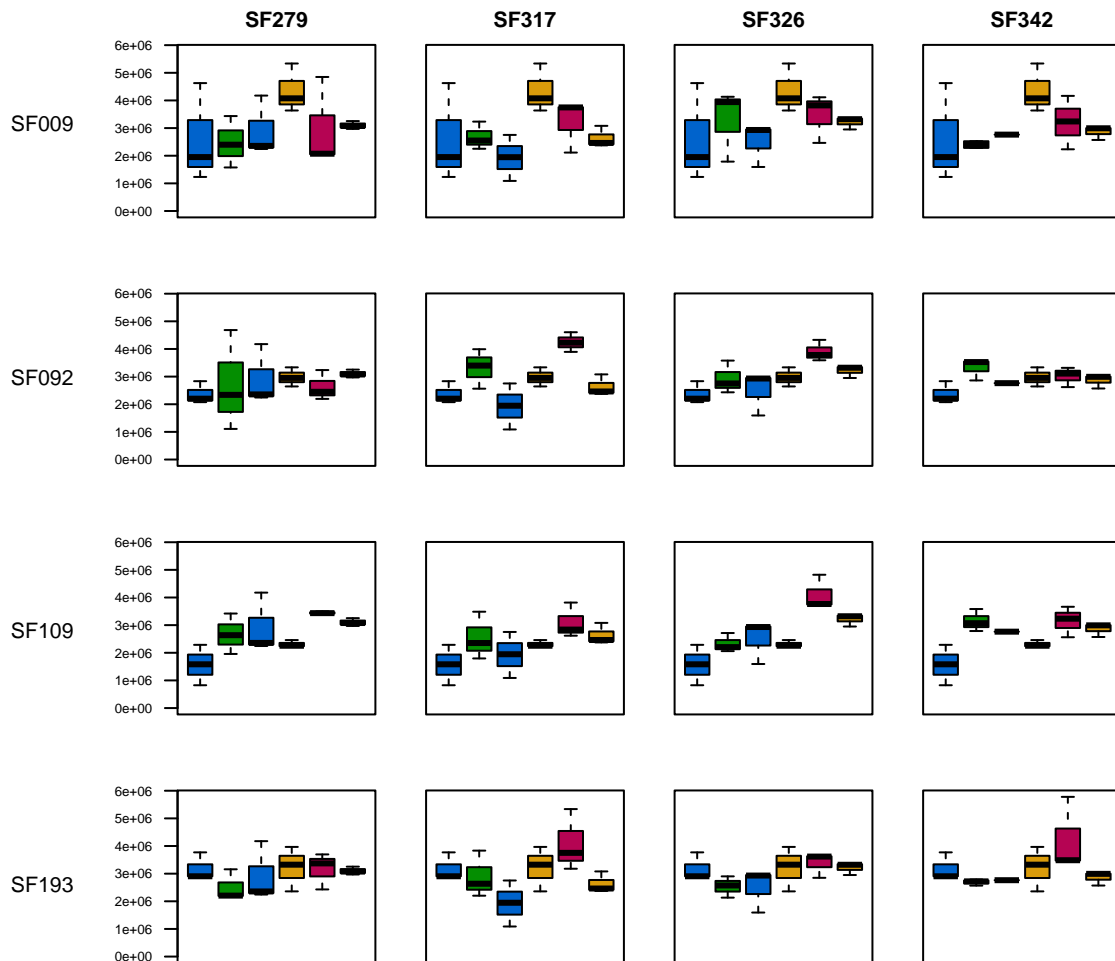

HanXRQChr04g0127591  
Putative aconitase/isopropylmalate  
dehydratase

Parents WW  
Parents WD  
Hybrids WW  
Hybrids WD

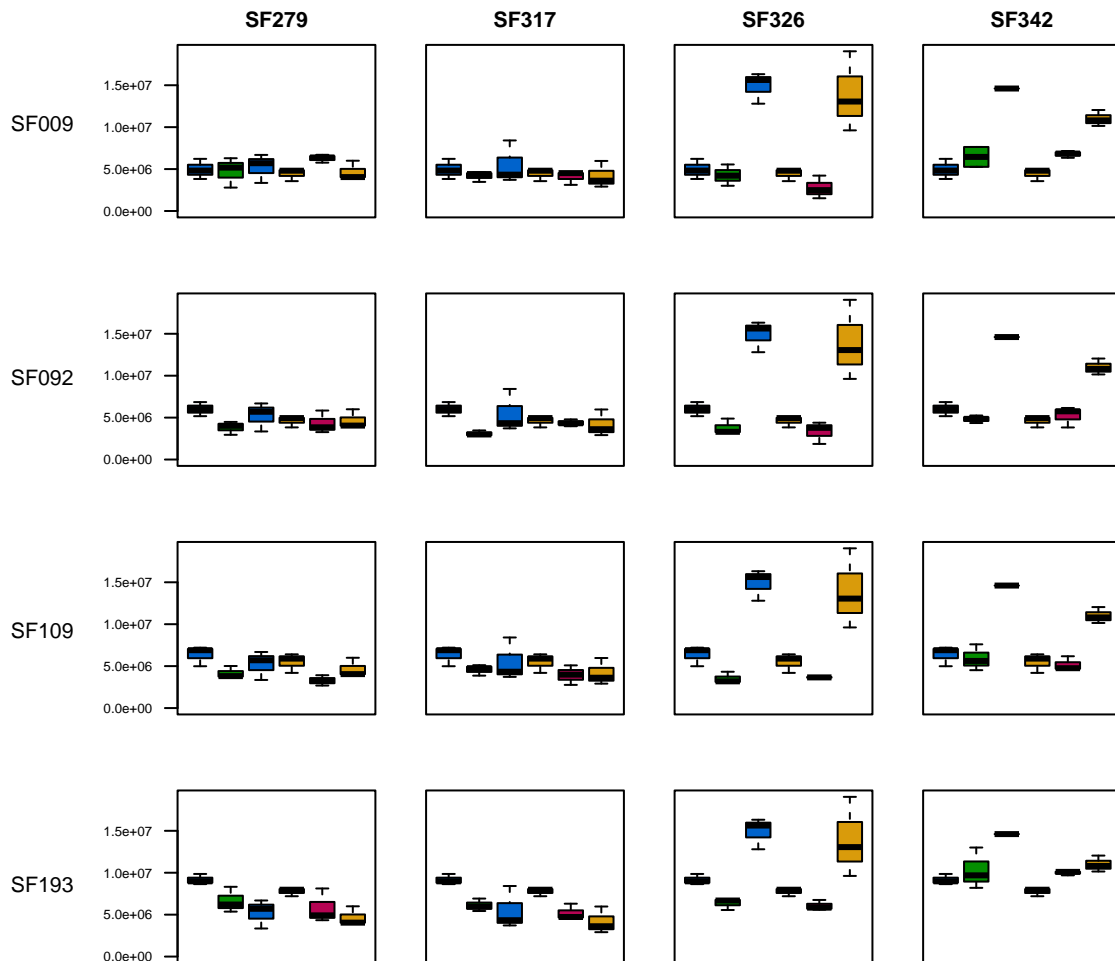

HanXRQChr14g0441641  
Putative fructose-bisphosphate  
aldolase, class-I; Aldolase-type TIM barrel

Parents WW  
Parents WD  
Hybrids WW  
Hybrids WD

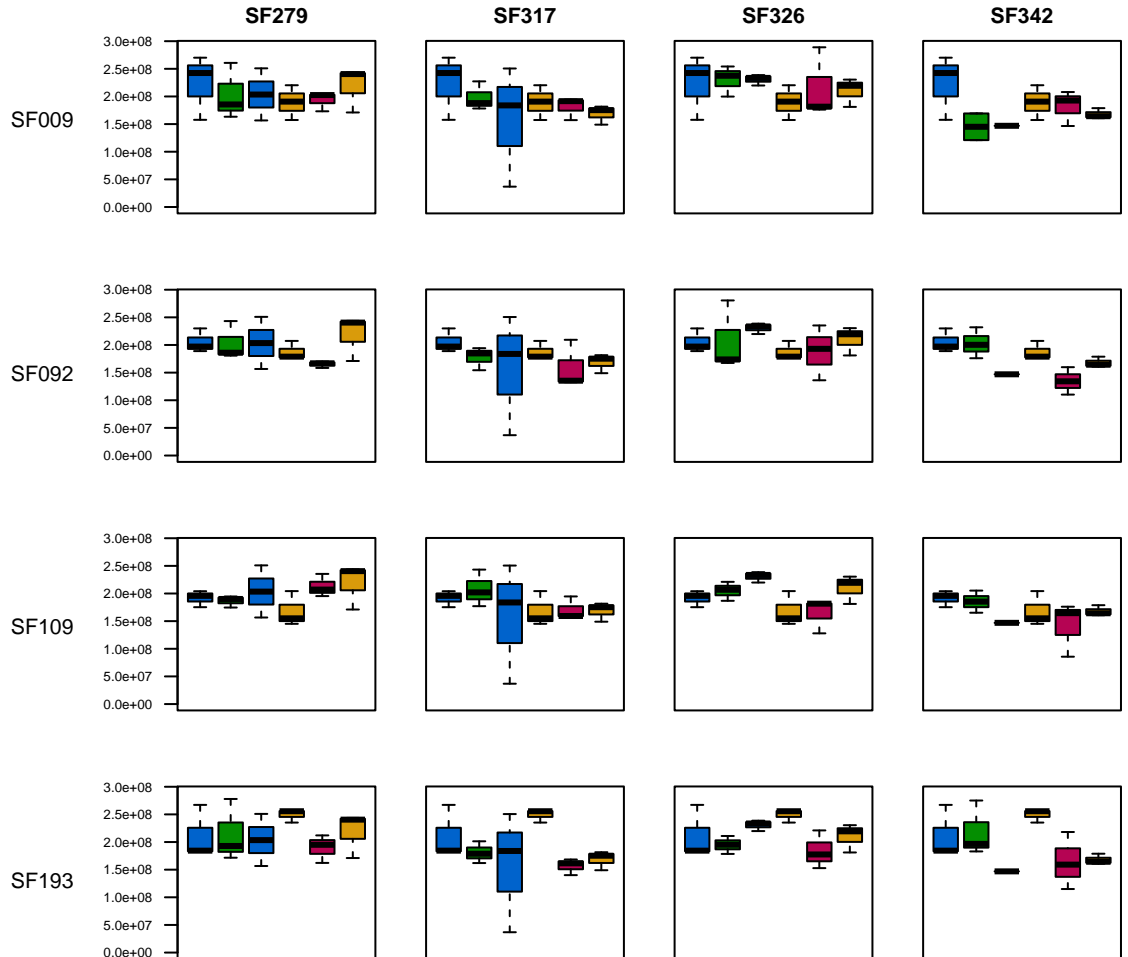

HanXRQChr16g0528421  
 Probable vacuolar ATP synthase subunit  
 C (VATC) / V-ATPase C subunit / vacuolar p

Parents WW  
 Parents WD  
 Hybrids WW  
 Hybrids WD

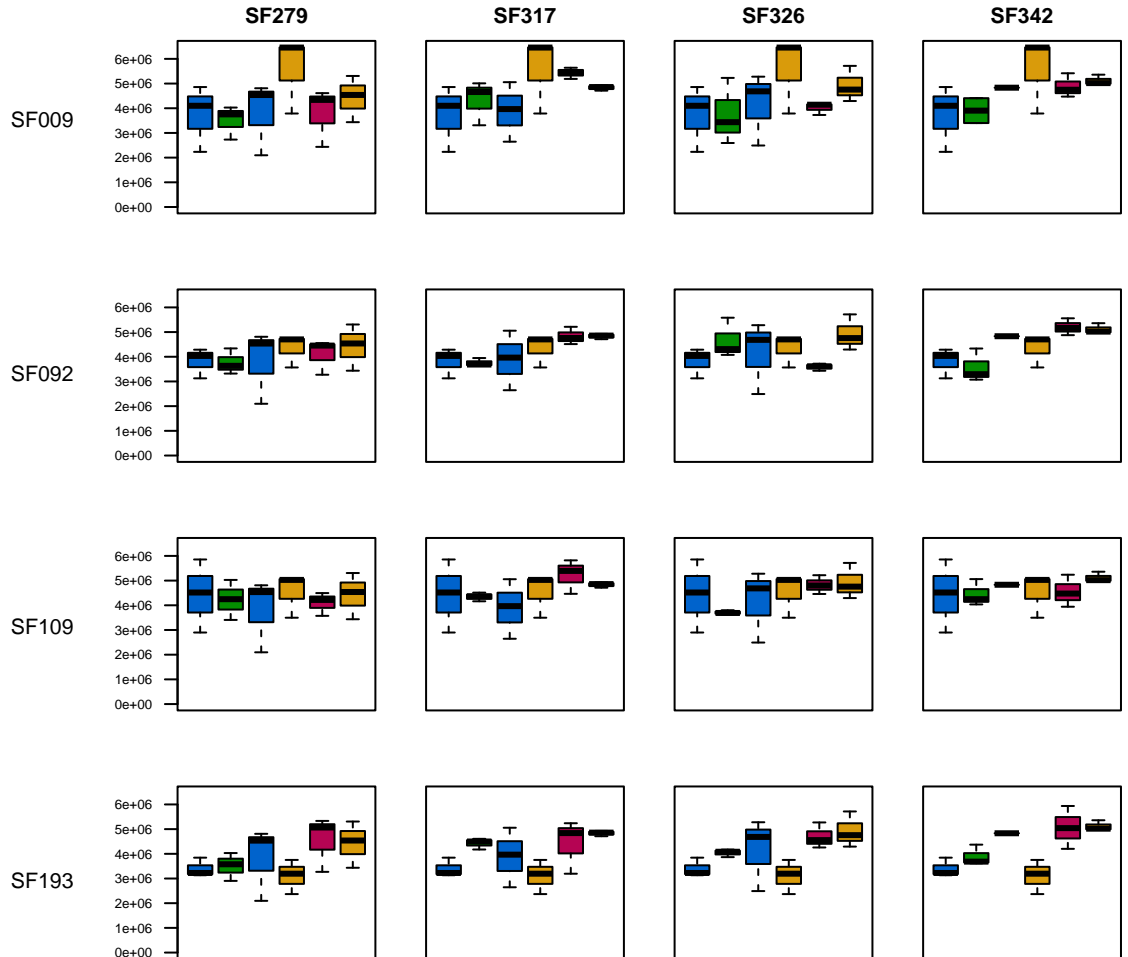

HanXRQChr02g0058711  
Putative dihydrolipoamide  
succinyltransferase; Chloramphenicol acety

Parents WW  
Parents WD  
Hybrids WW  
Hybrids WD

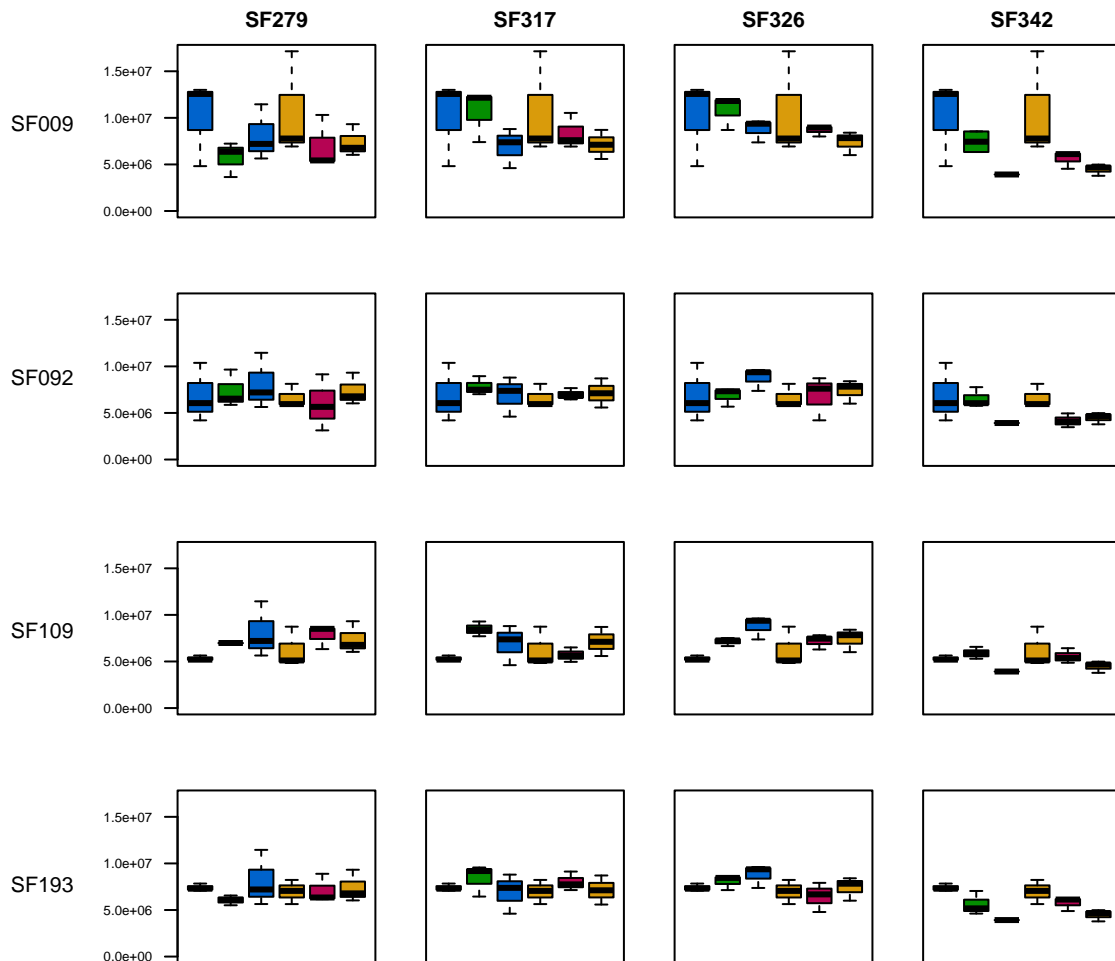

HanXRQChr11g0330251  
Putative uncharacterised domain,  
di-copper centre; Polyphenol oxidase

Parents WW  
Parents WD  
Hybrids WW  
Hybrids WD

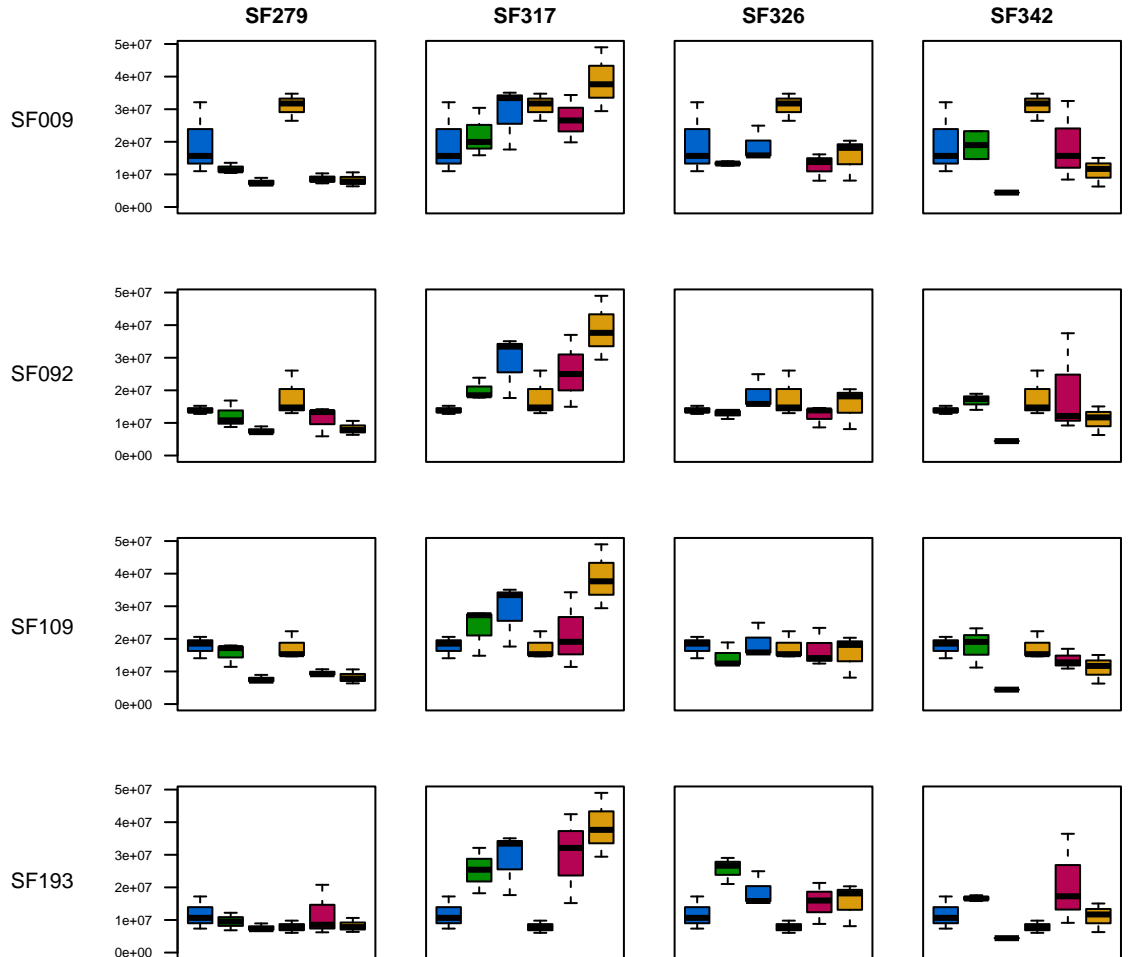



HanXRQChr09g0269471  
Probable thioredoxin H-type 1

Parents WW  
Parents WD  
Hybrids WW  
Hybrids WD

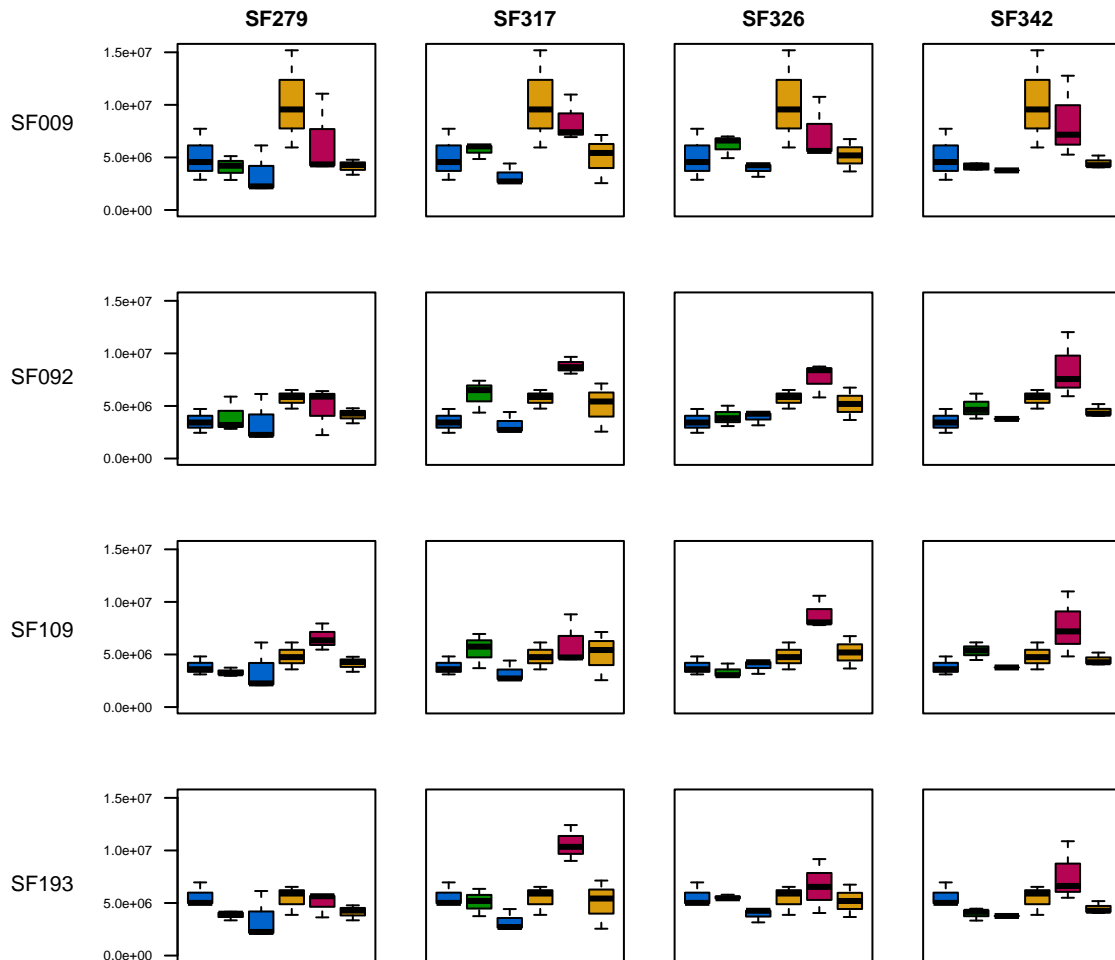

HanXRQChr01g0010601  
Probable WCRKC thioredoxin 1

Parents WW  
Parents WD  
Hybrids WW  
Hybrids WD

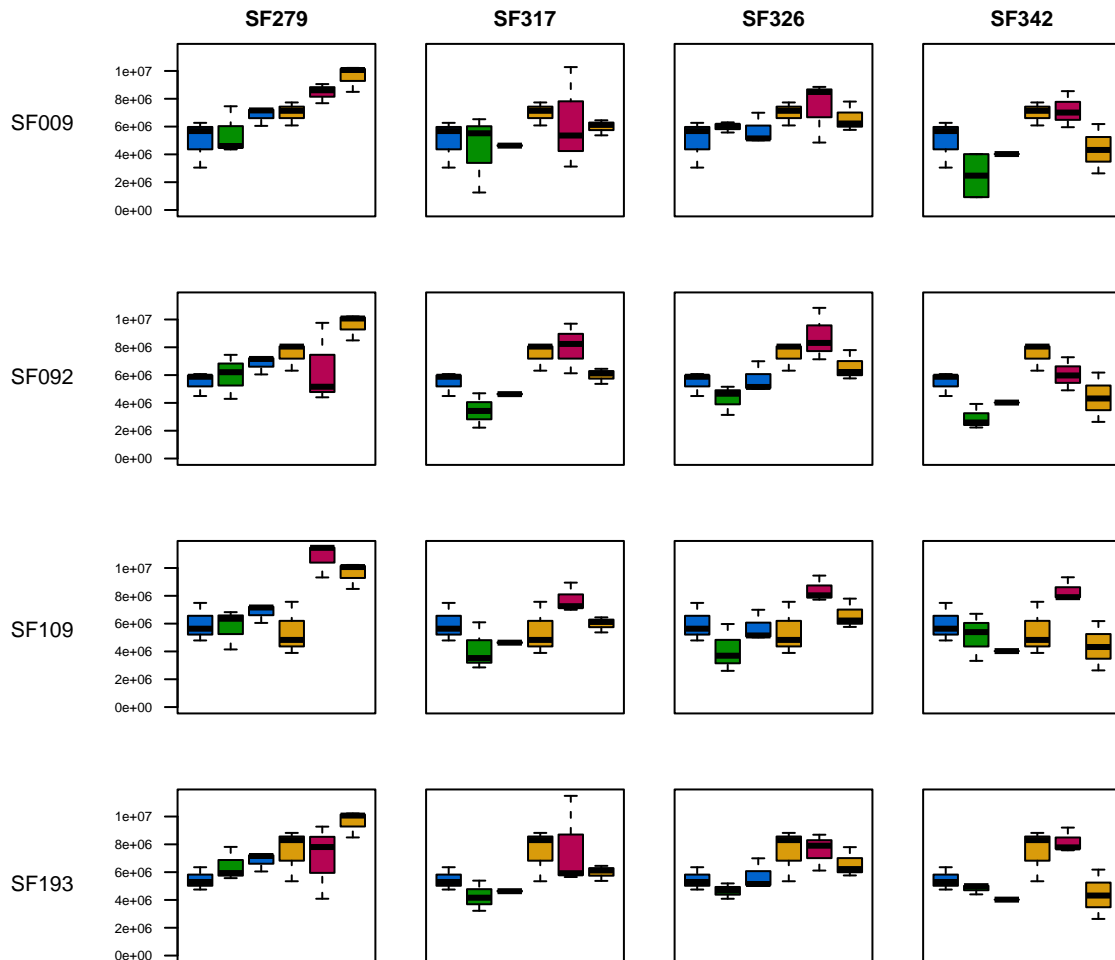

HanXRQChr15g0493441  
Probable class I glutamine  
amidotransferase-like superfamily protein

Parents WW  
Parents WD  
Hybrids WW  
Hybrids WD

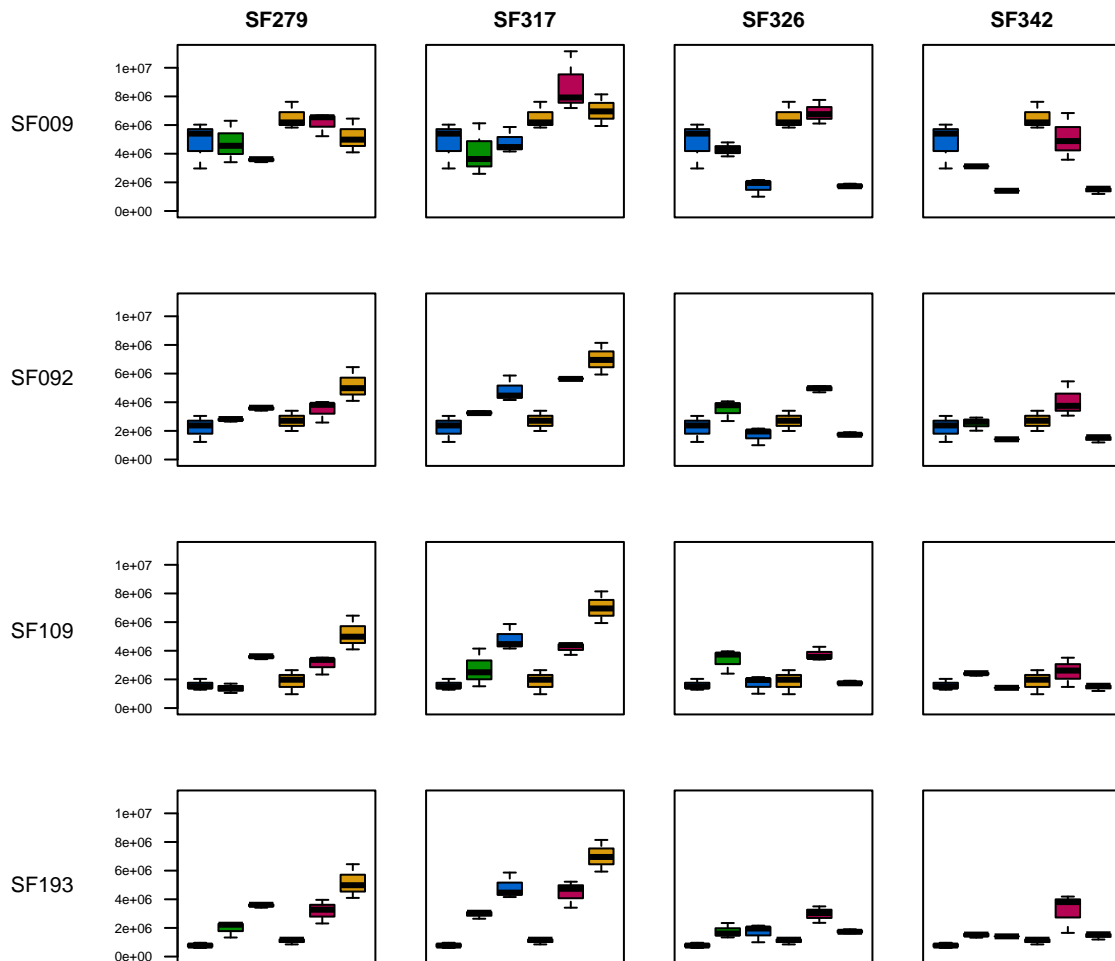

HanXRQChr13g0425221  
 Probable N-terminal nucleophile  
 aminohydrolases (Ntn hydrolases) superfan

Parents WW  
 Parents WD  
 Hybrids WW  
 Hybrids WD

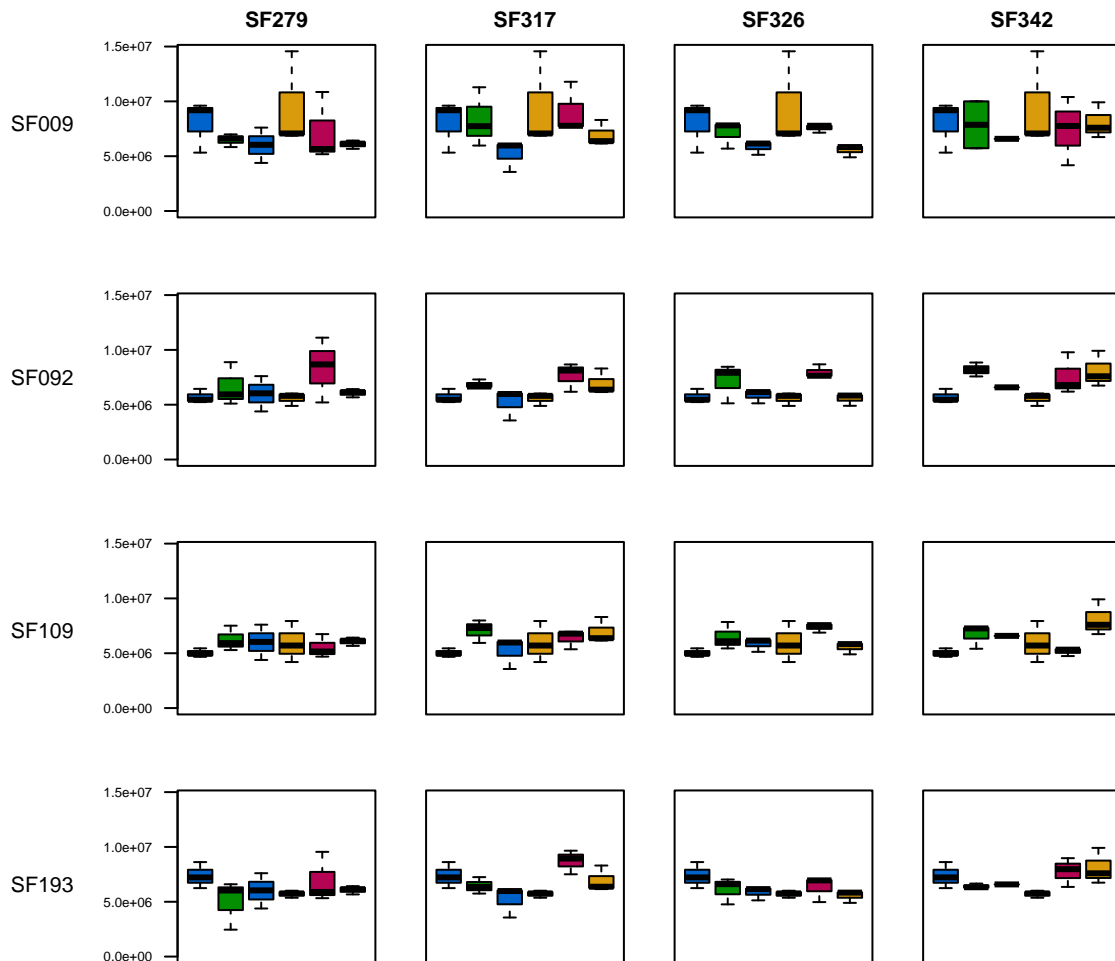

HanXRQChr02g0055341  
Probable ribosomal protein L9

Parents WW  
Parents WD  
Hybrids WW  
Hybrids WD

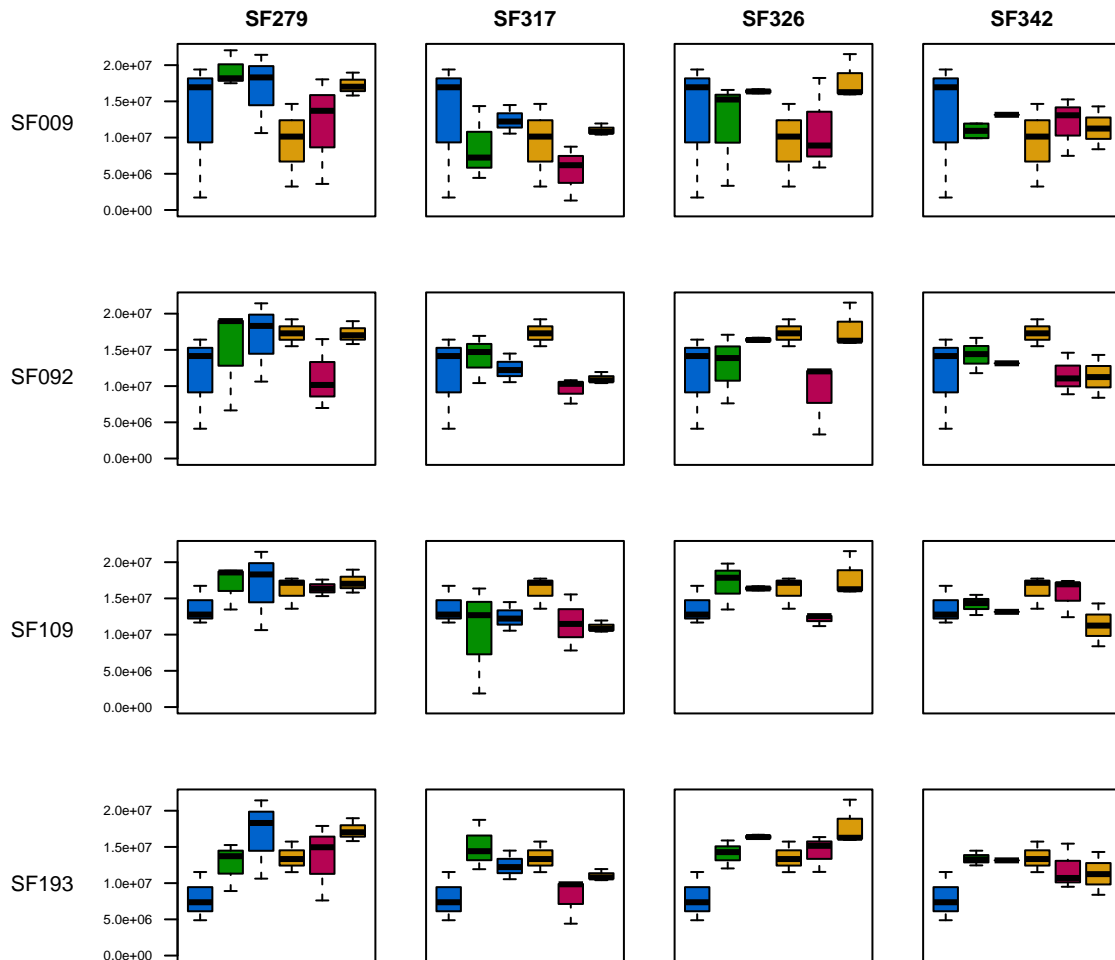

HanXRQChr01g0000141  
Putative plant lipid transfer  
protein/Par allergen; Bifunctional inhibitor/pl

Parents WW  
Parents WD  
Hybrids WW  
Hybrids WD

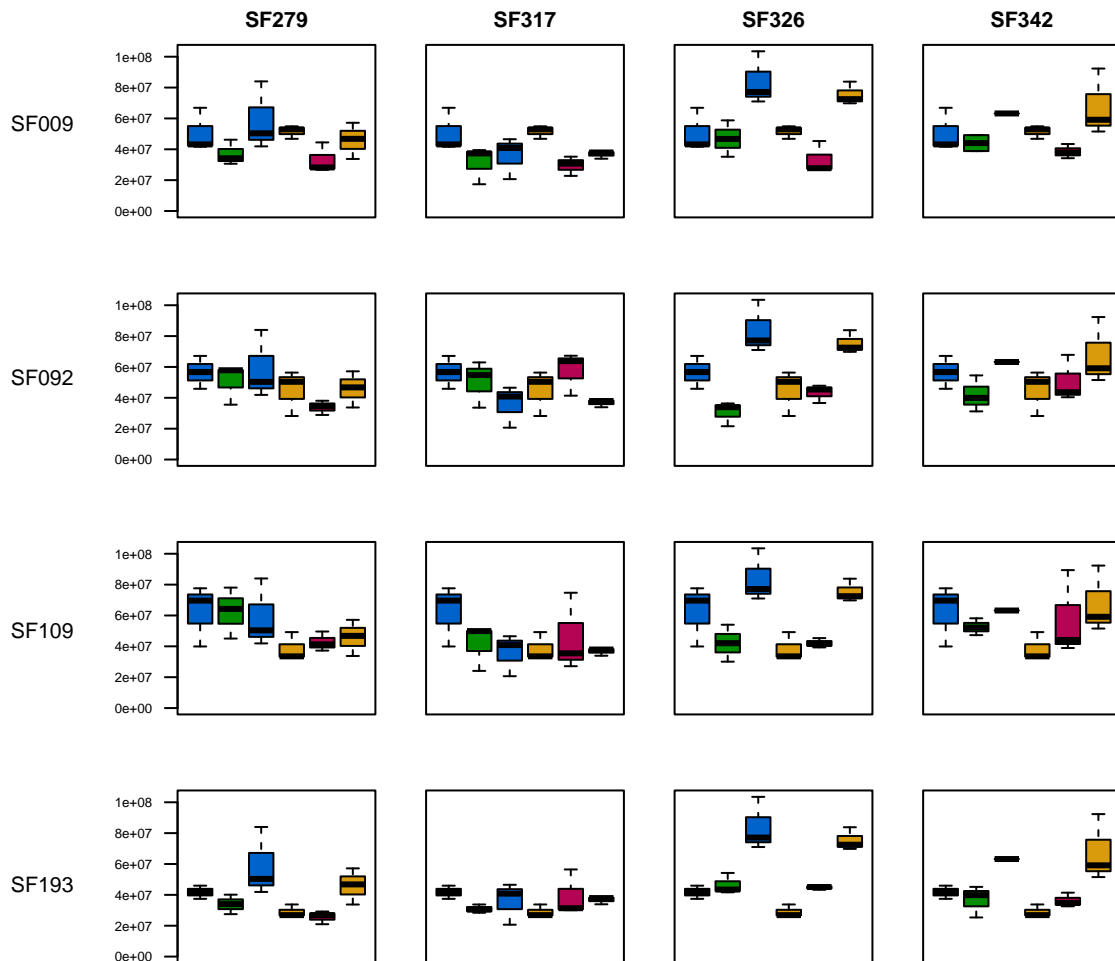

HanXRQChr10g0284101  
Probable fumarylacetoacetase, putative

Parents WW  
Parents WD  
Hybrids WW  
Hybrids WD

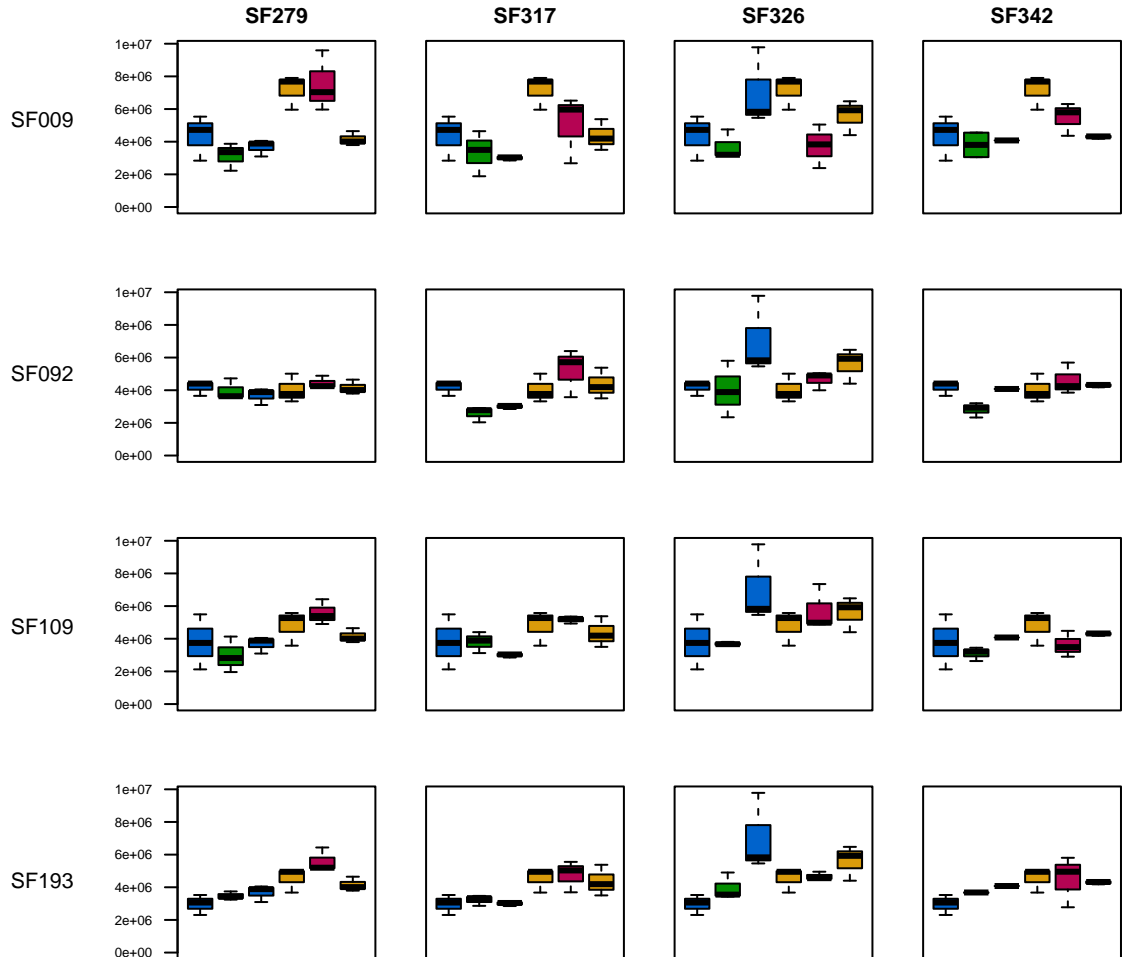

HanXRQChr14g0432741  
Probable guanine nucleotide-binding  
protein subunit beta-like protein

Parents WW  
Parents WD  
Hybrids WW  
Hybrids WD

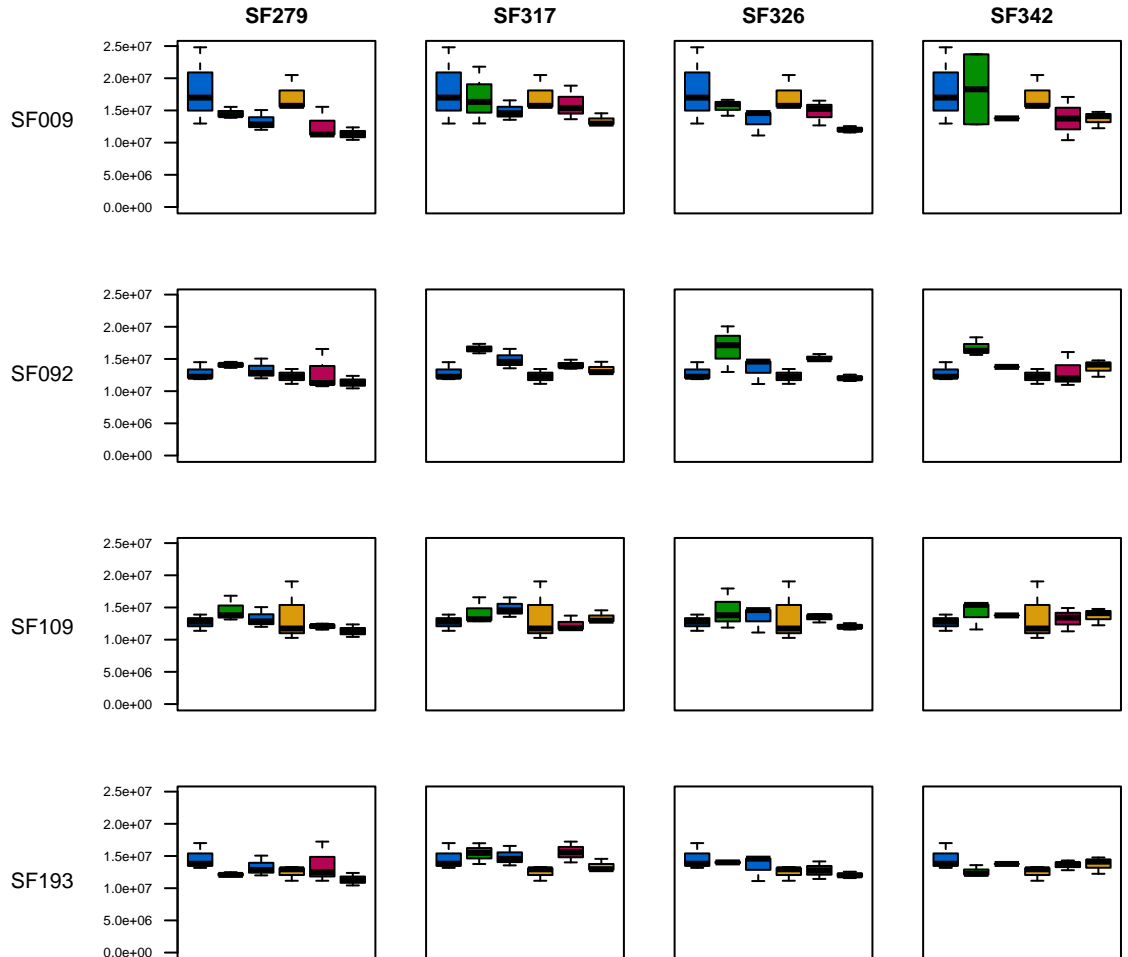



HanXRQChr13g0412571  
Probable pectinacetyltransferase family  
protein

Parents WW  
Parents WD  
Hybrids WW  
Hybrids WD

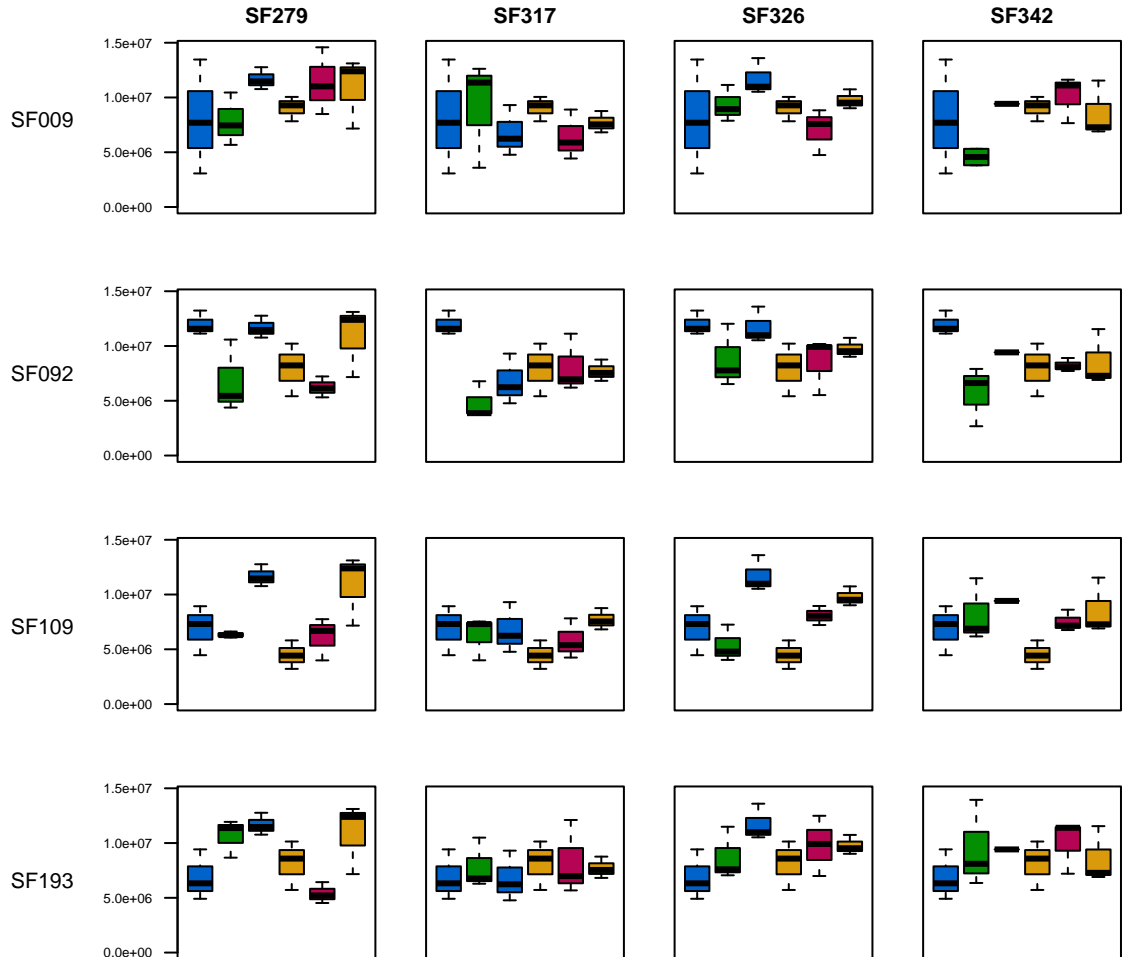

HanXRQChr10g0314491  
Putative adenylate kinase/UMP-CMP  
kinase; P-loop containing nucleoside triphc

Parents WW  
Parents WD  
Hybrids WW  
Hybrids WD

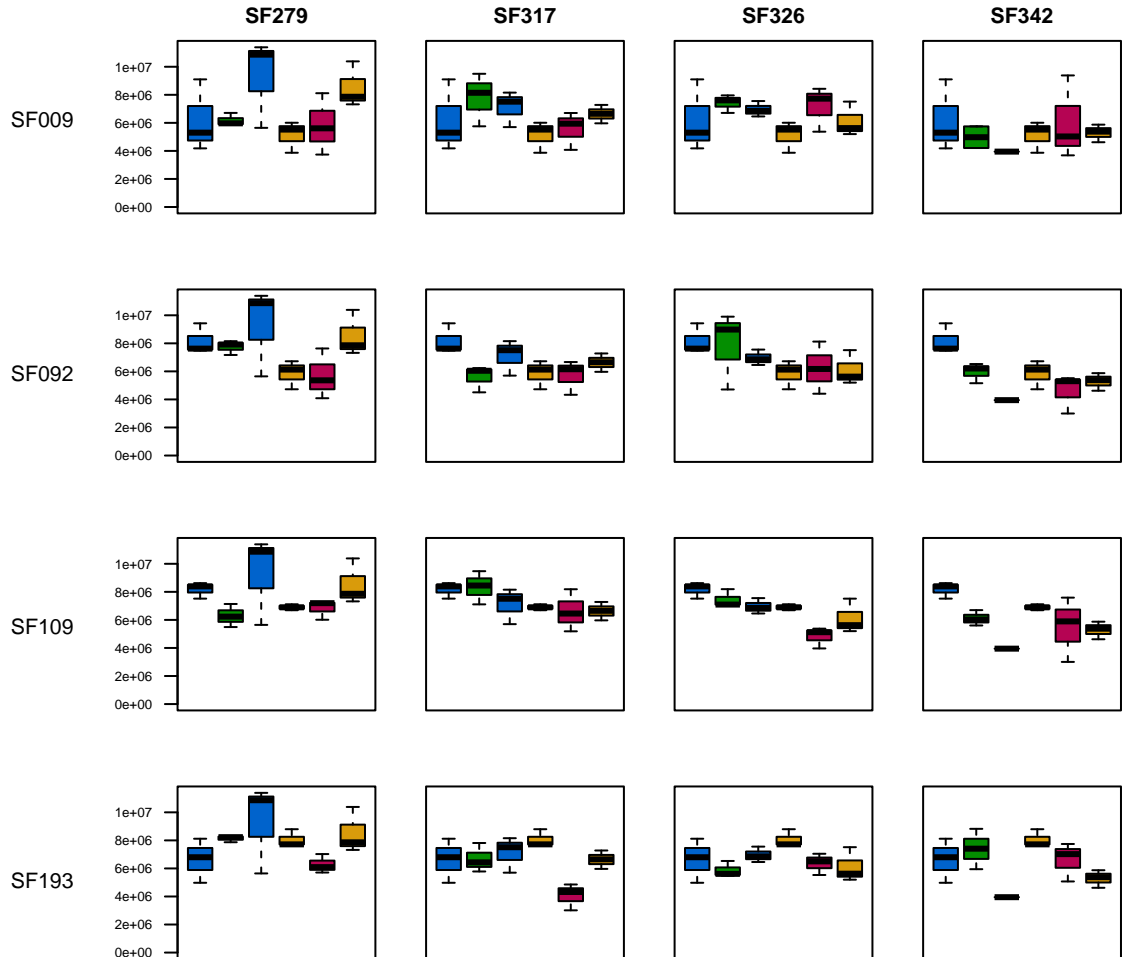

HanXRQChr01g0013111  
Uncharacterized conserved protein

Parents WW  
Parents WD  
Hybrids WW  
Hybrids WD

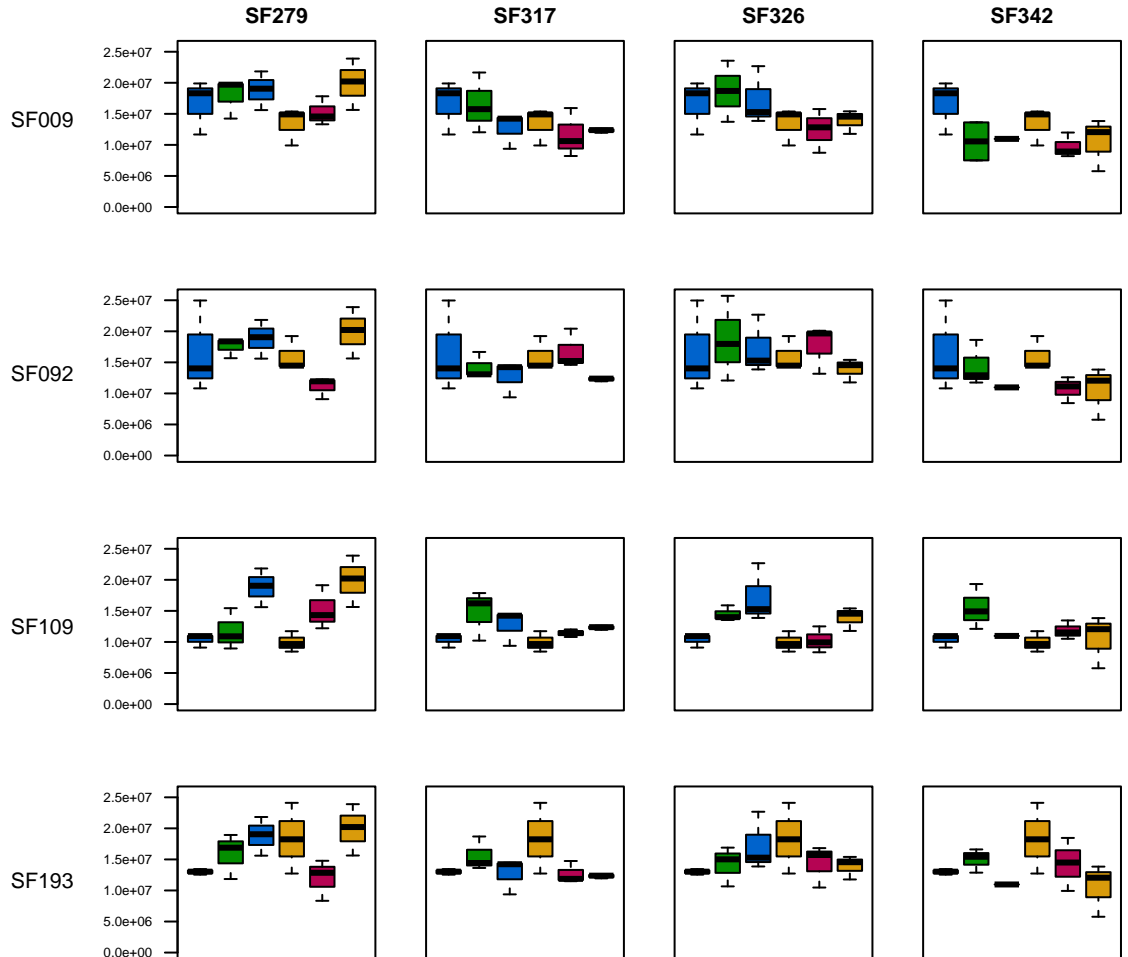

HanXRQChr09g0262361  
Probable CLP protease proteolytic  
subunit 3

Parents WW  
Parents WD  
Hybrids WW  
Hybrids WD

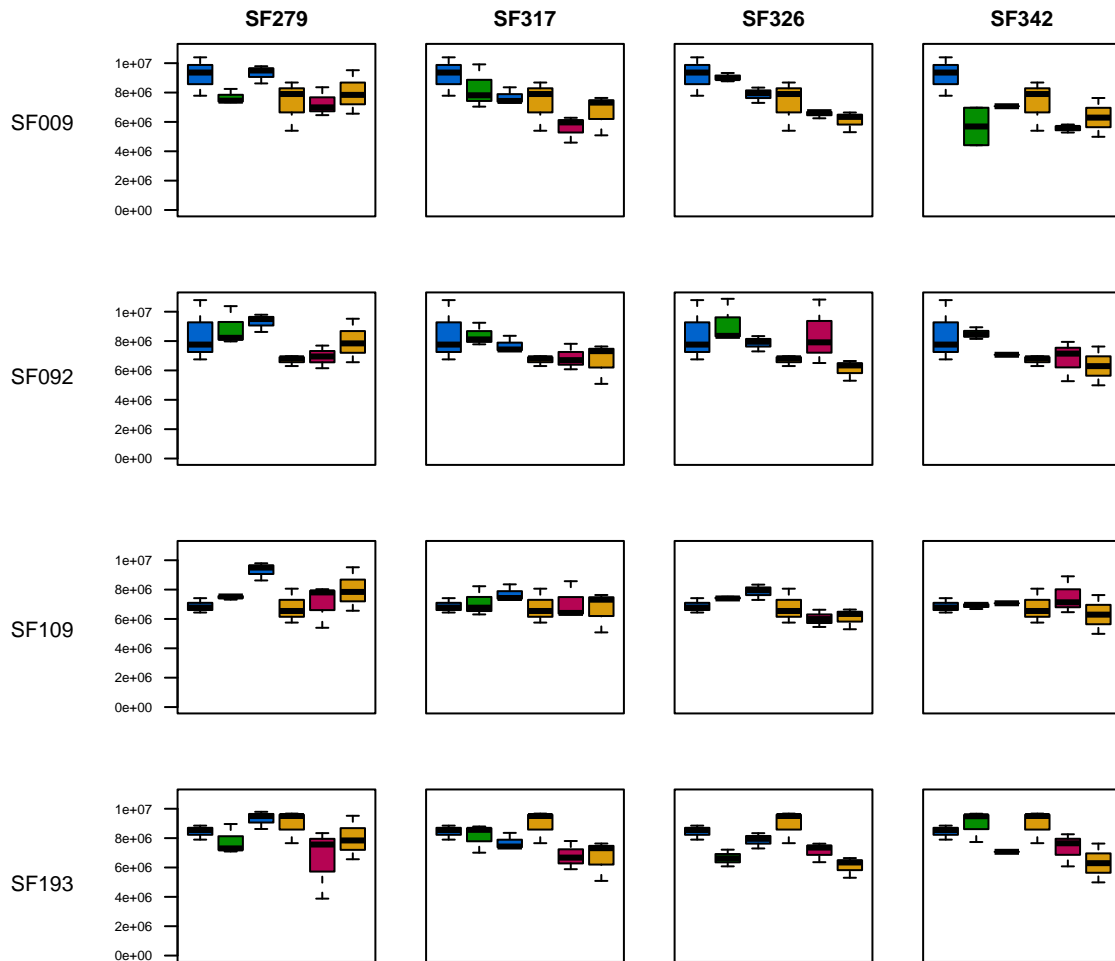

HanXRQChr03g0088221  
Probable 50S ribosomal protein L3,  
chloroplastic

Parents WW  
Parents WD  
Hybrids WW  
Hybrids WD

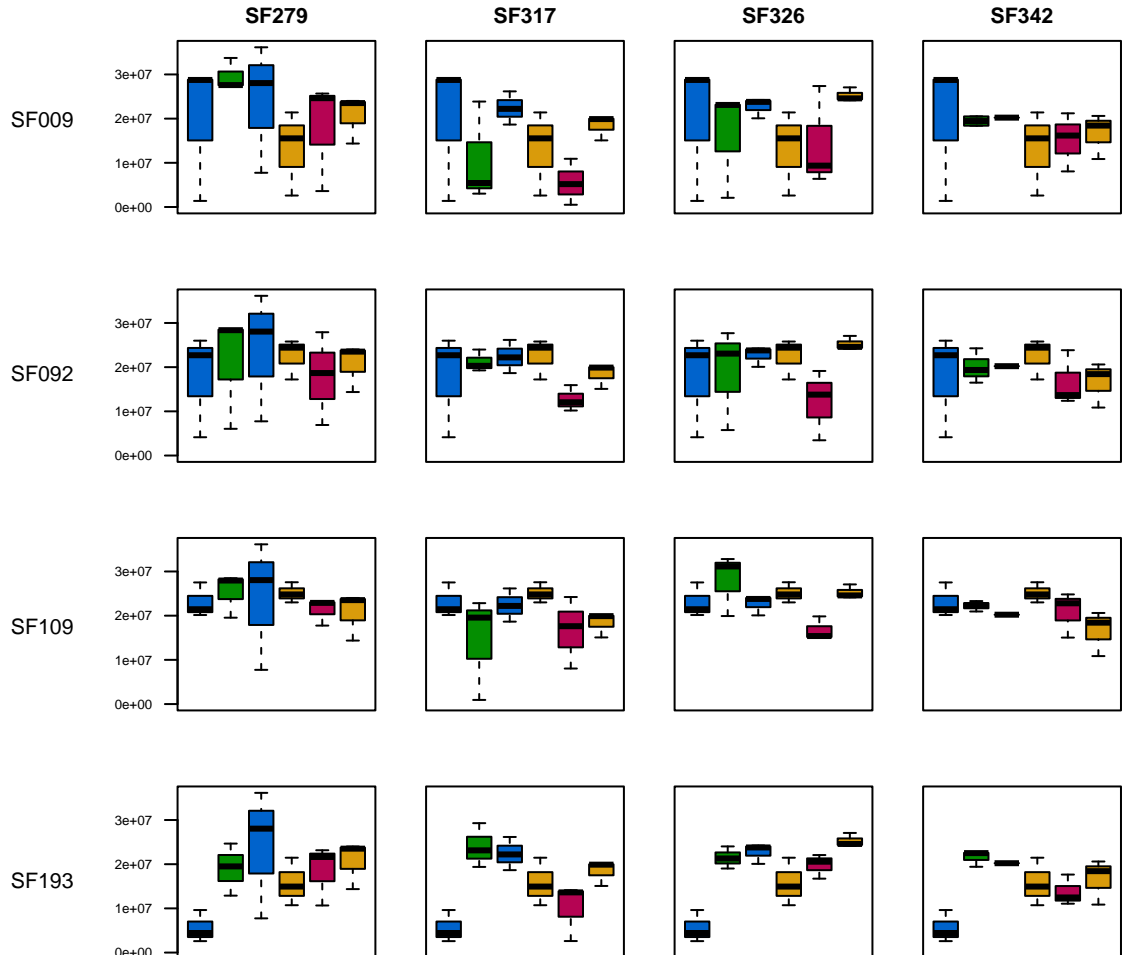

HanXRQChr10g0297791  
Probable ATP sulfurylase 1

Parents WW  
Parents WD  
Hybrids WW  
Hybrids WD

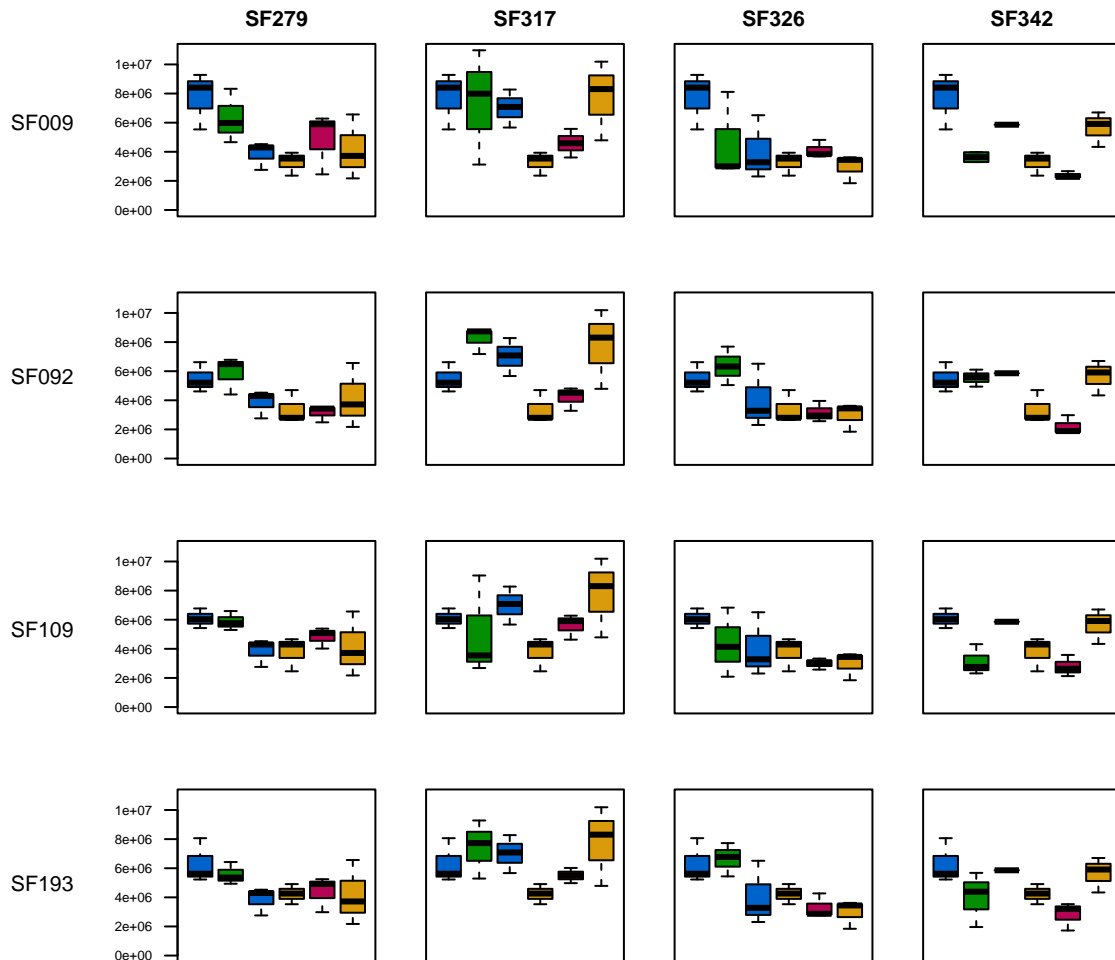

HanXRQChr02g0059101  
Probable cysteine synthase,  
chloroplastic/chromoplastic

Parents WW  
Parents WD  
Hybrids WW  
Hybrids WD

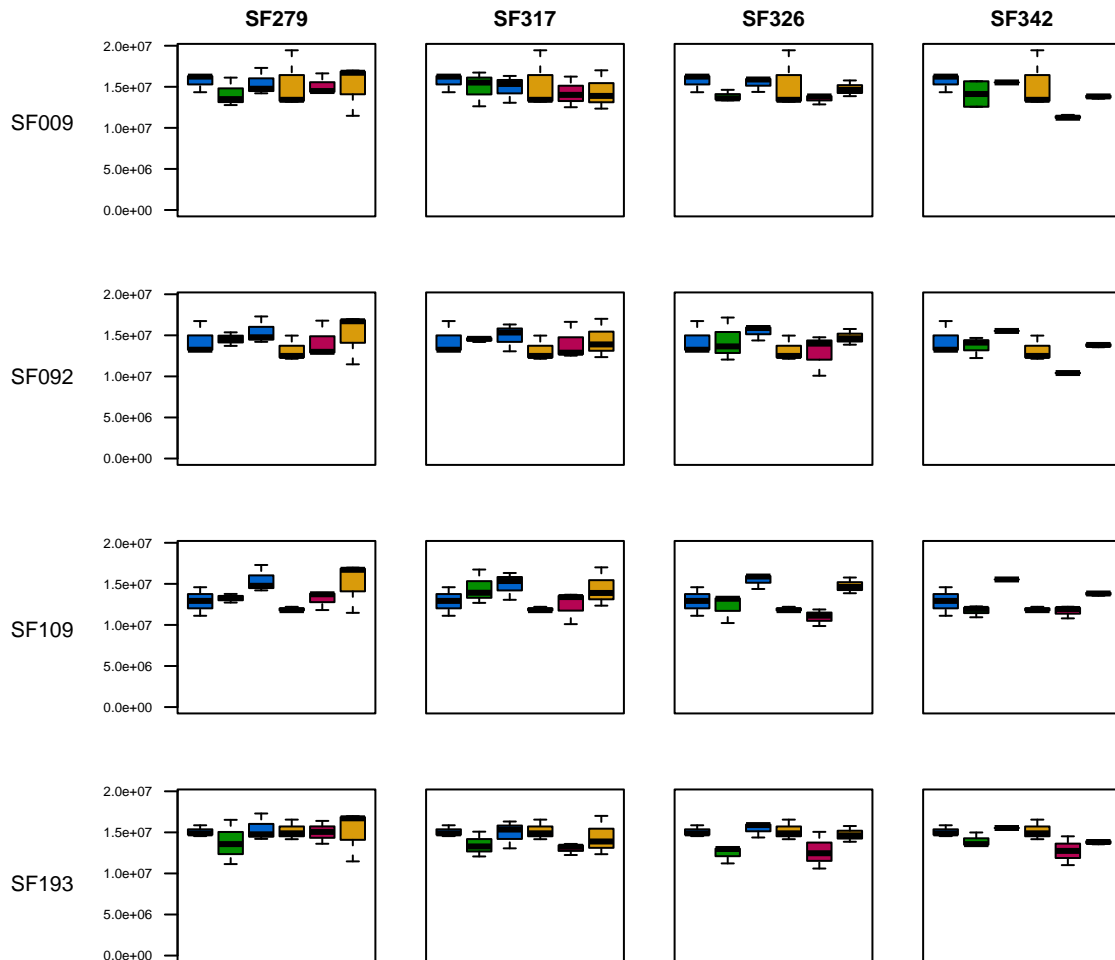

HanXRQChr16g0529891  
Probable  
phosphoglucomutase/phosphomannomutase

Parents WW  
Parents WD  
Hybrids WW  
Hybrids WD

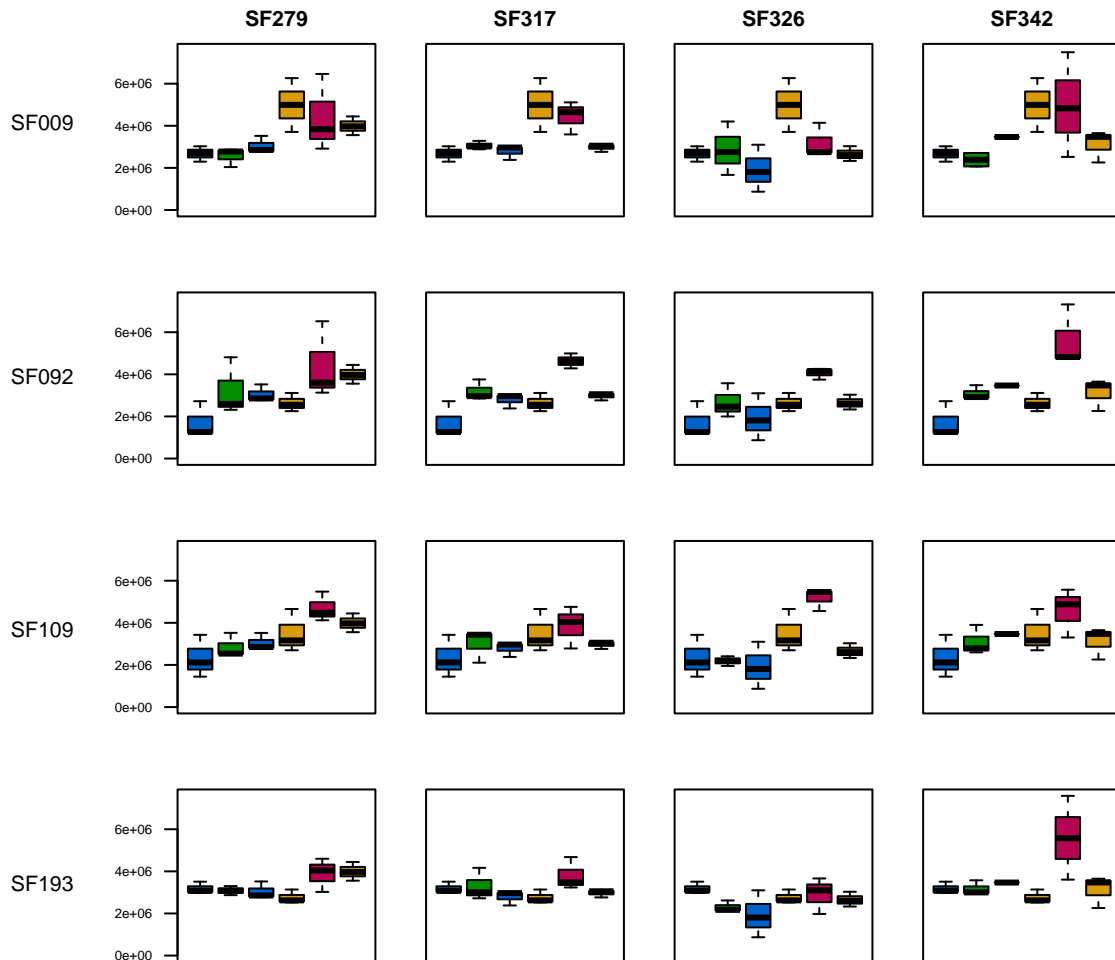



HanXRQChr10g0284611  
Probable stress-related protein

Parents WW  
Parents WD  
Hybrids WW  
Hybrids WD

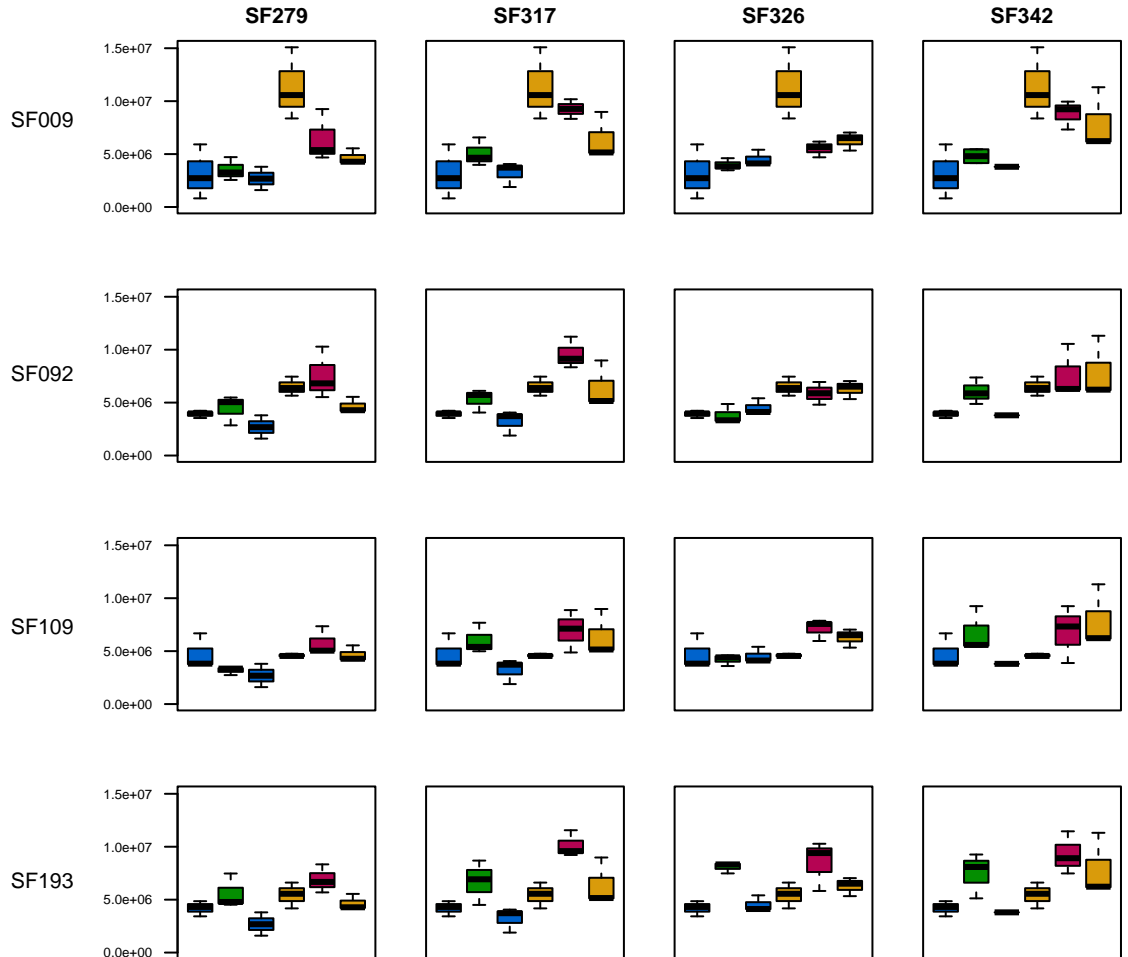

HanXRQChr08g0236291  
 Probable tocopherol cyclase,  
 chloroplast / vitamin E deficient 1 (VTE1) / ε

Parents WW  
 Parents WD  
 Hybrids WW  
 Hybrids WD

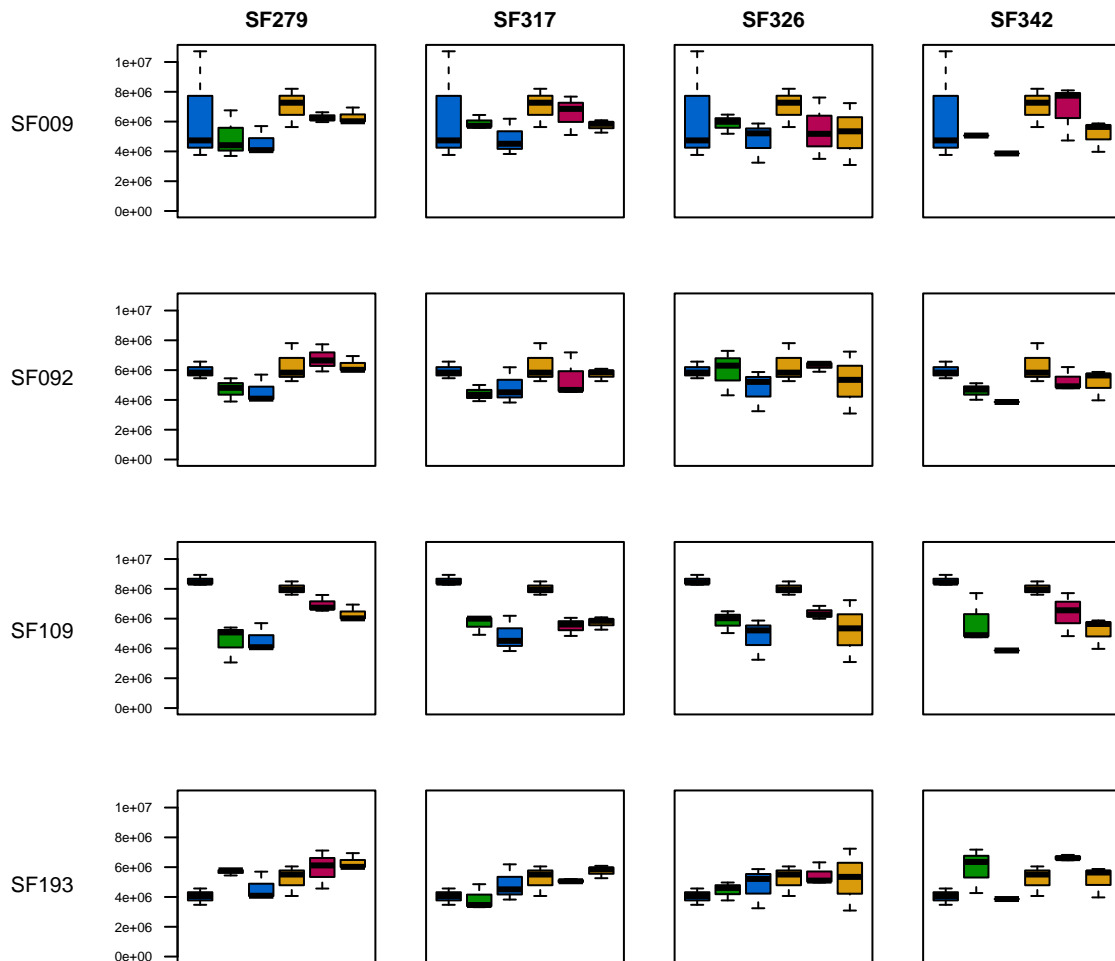

HanXRQChr14g0454371  
Putative major intrinsic protein;  
Aquaporin-like

Parents WW  
Parents WD  
Hybrids WW  
Hybrids WD

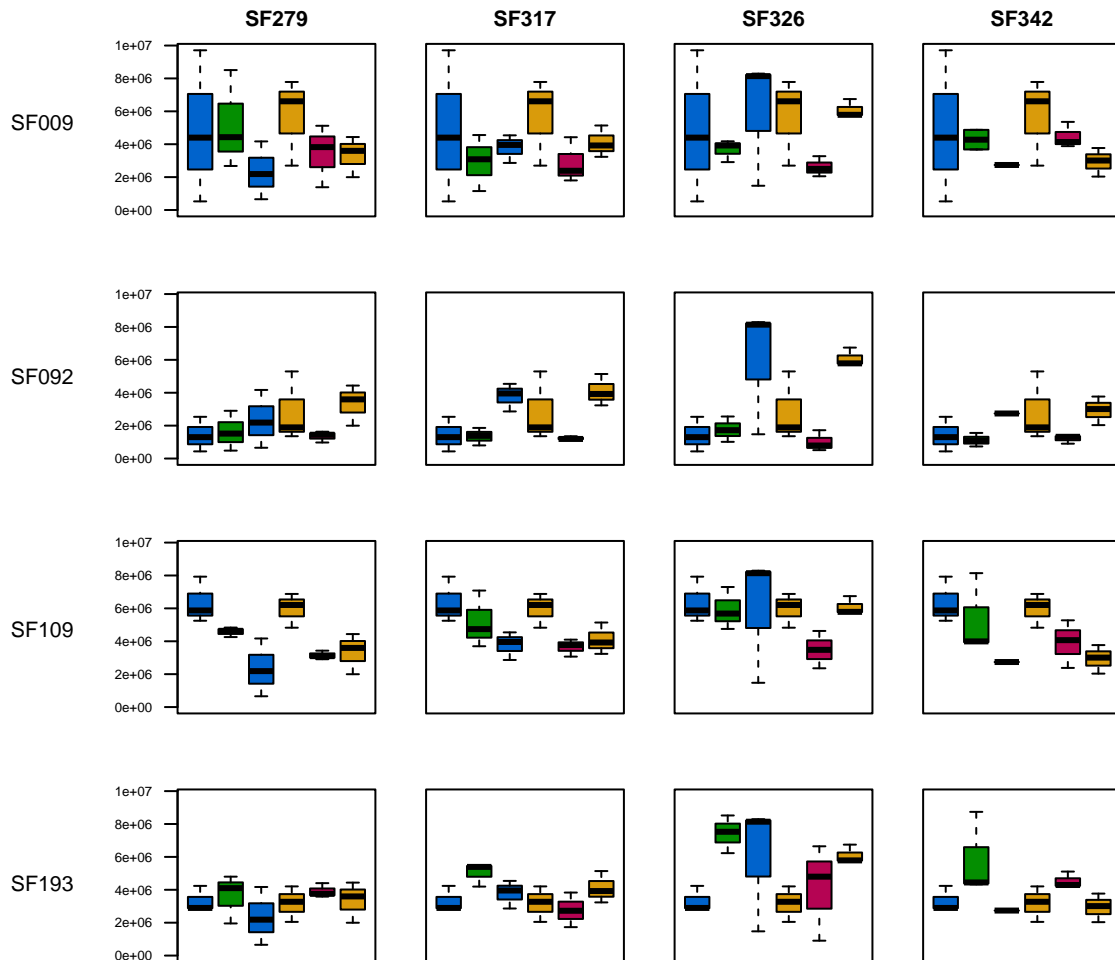

HanXRQChr03g0079051  
 Probable NADH dehydrogenase  
 [ubiquinone] iron-sulfur protein 7, mitochondrion

Parents WW  
 Parents WD  
 Hybrids WW  
 Hybrids WD

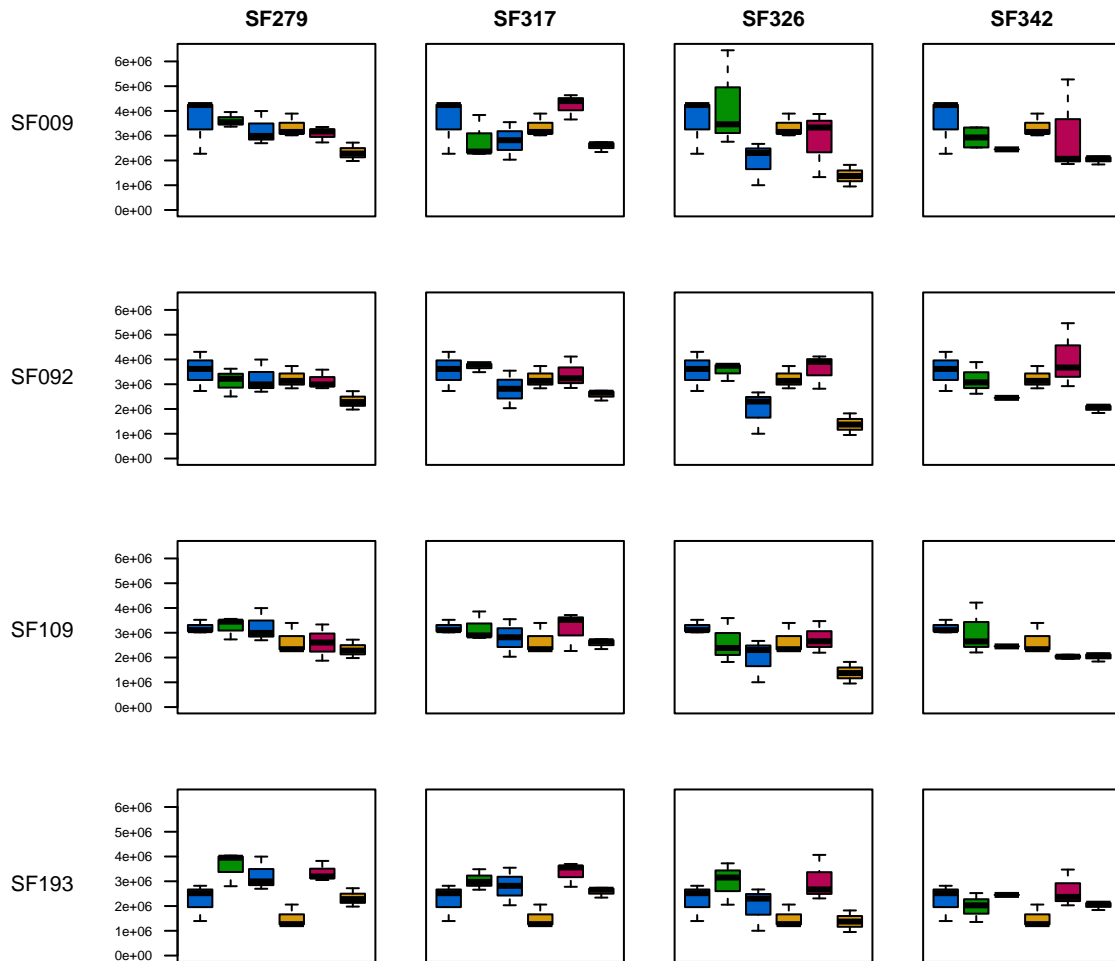

HanXRQChr16g0520371  
Probable metacaspase 4

Parents WW  
Parents WD  
Hybrids WW  
Hybrids WD

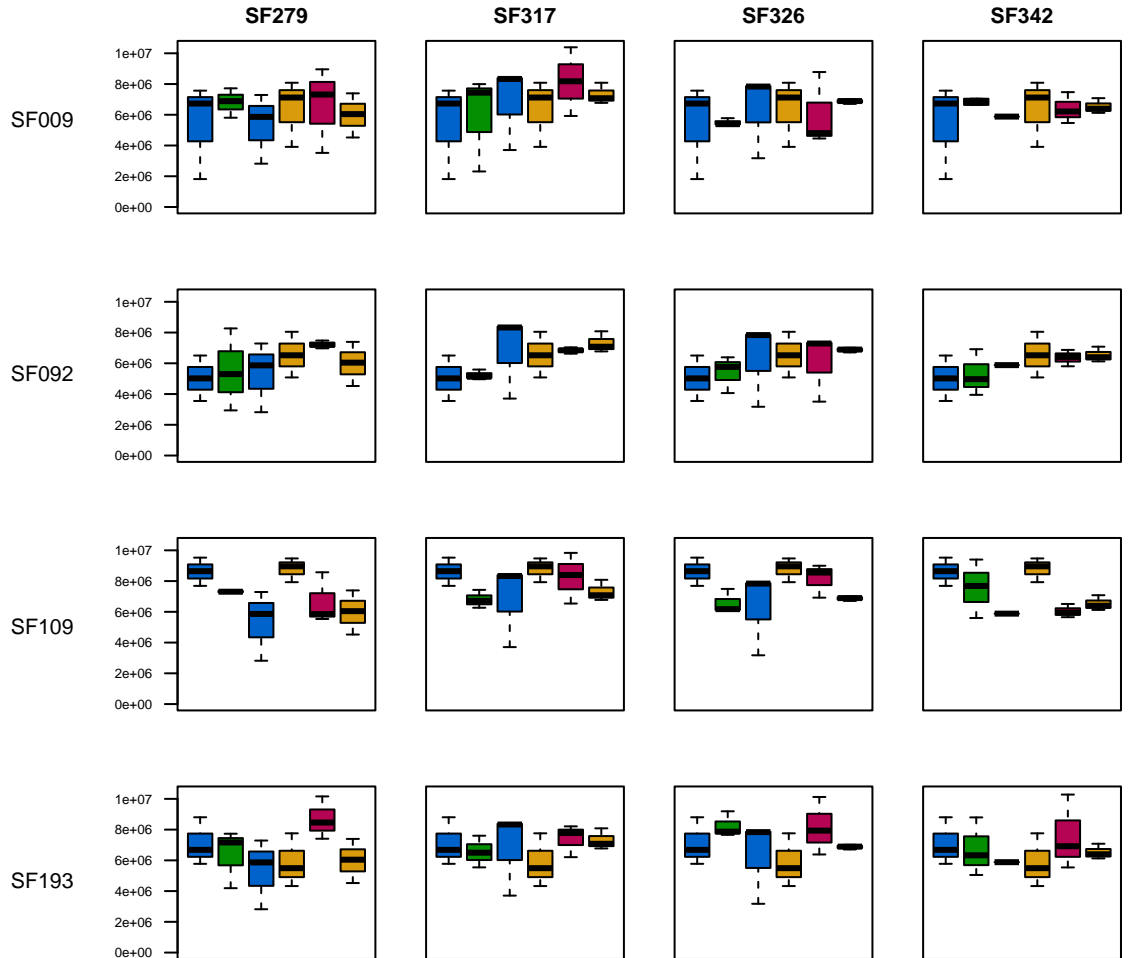

HanXRQChr17g0563041  
Putative ribulose biphosphate  
carboxylase small chain, domain; Ribulose-

Parents WW  
Parents WD  
Hybrids WW  
Hybrids WD

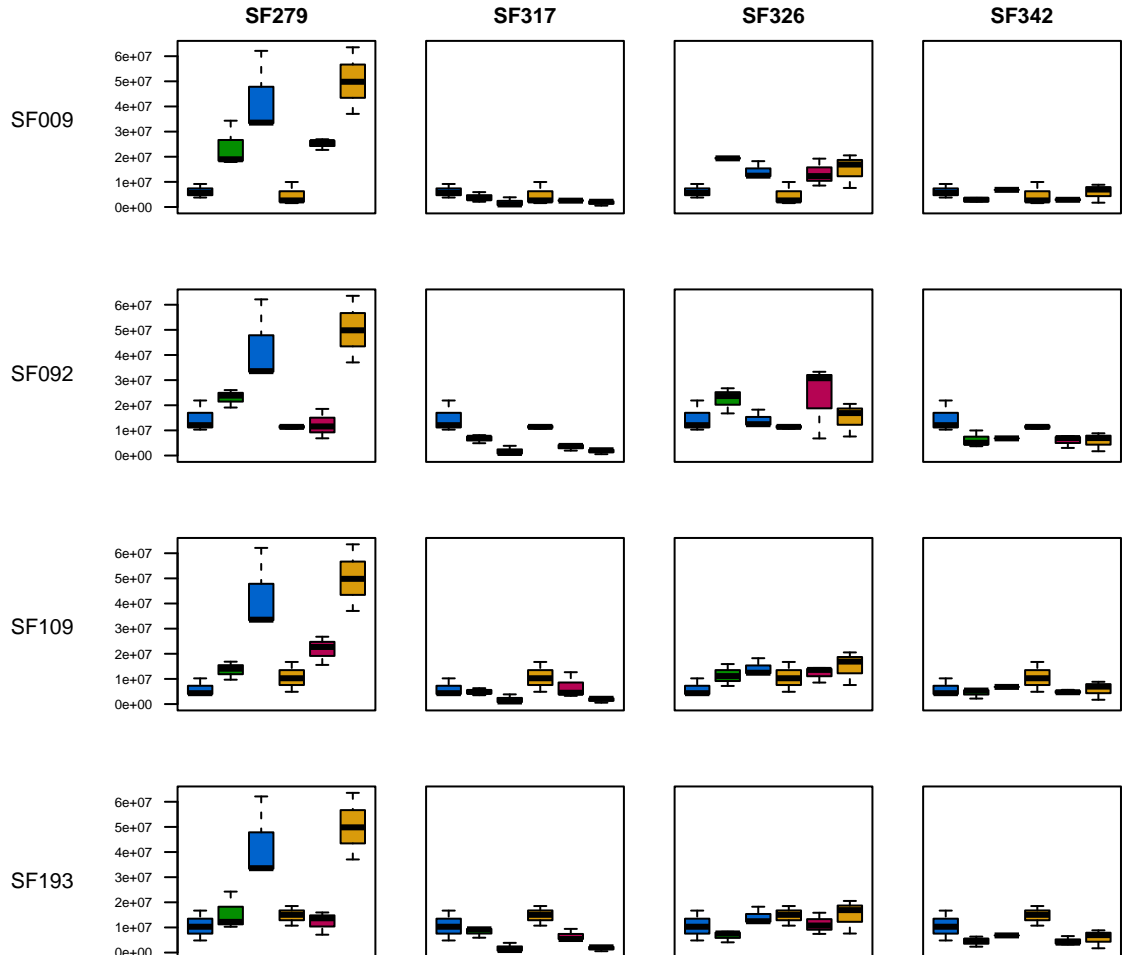

HanXRQChr09g0277451  
 Probable high chlorophyll fluorescence  
 phenotype 173

Parents WW  
 Parents WD  
 Hybrids WW  
 Hybrids WD

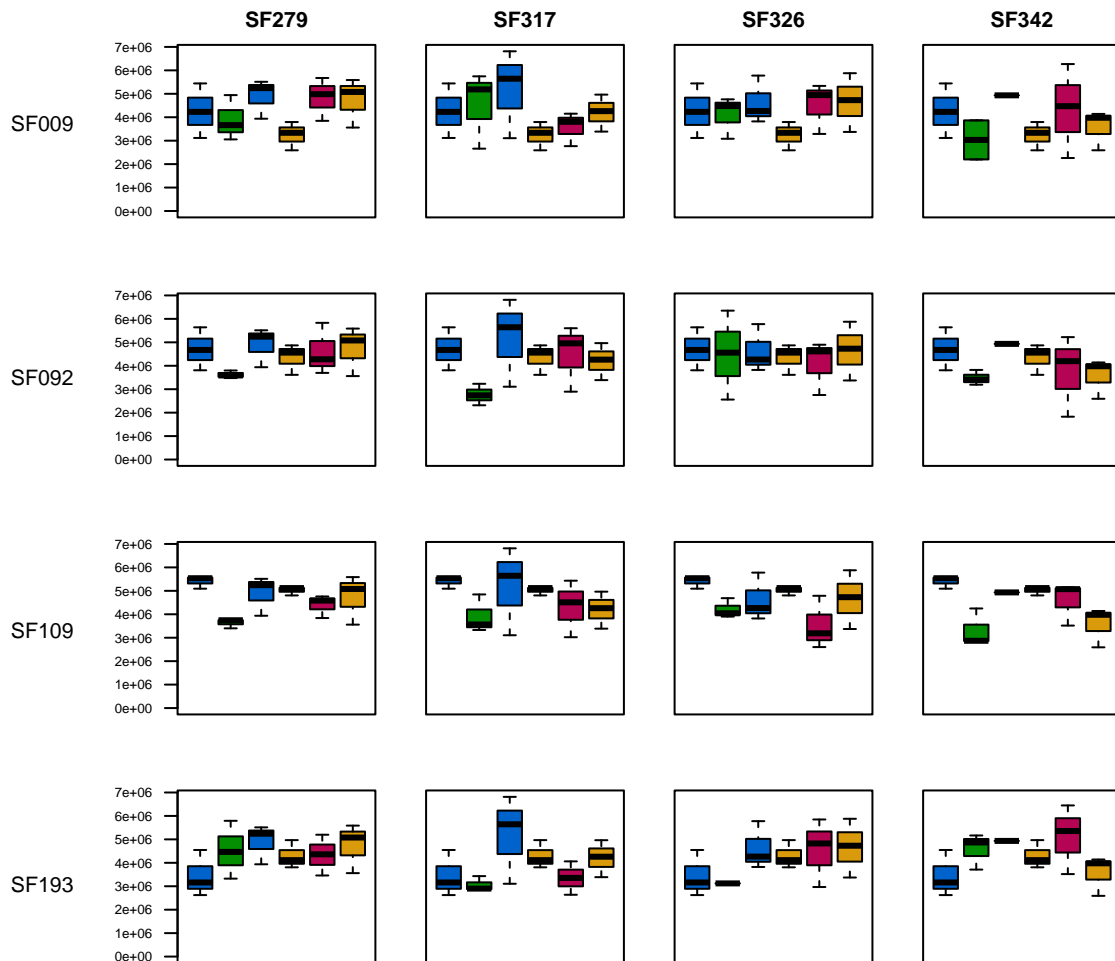

HanXRQChr01g0009271  
Probable ribulose biphosphate  
carboxylase large chain

Parents WW  
Parents WD  
Hybrids WW  
Hybrids WD

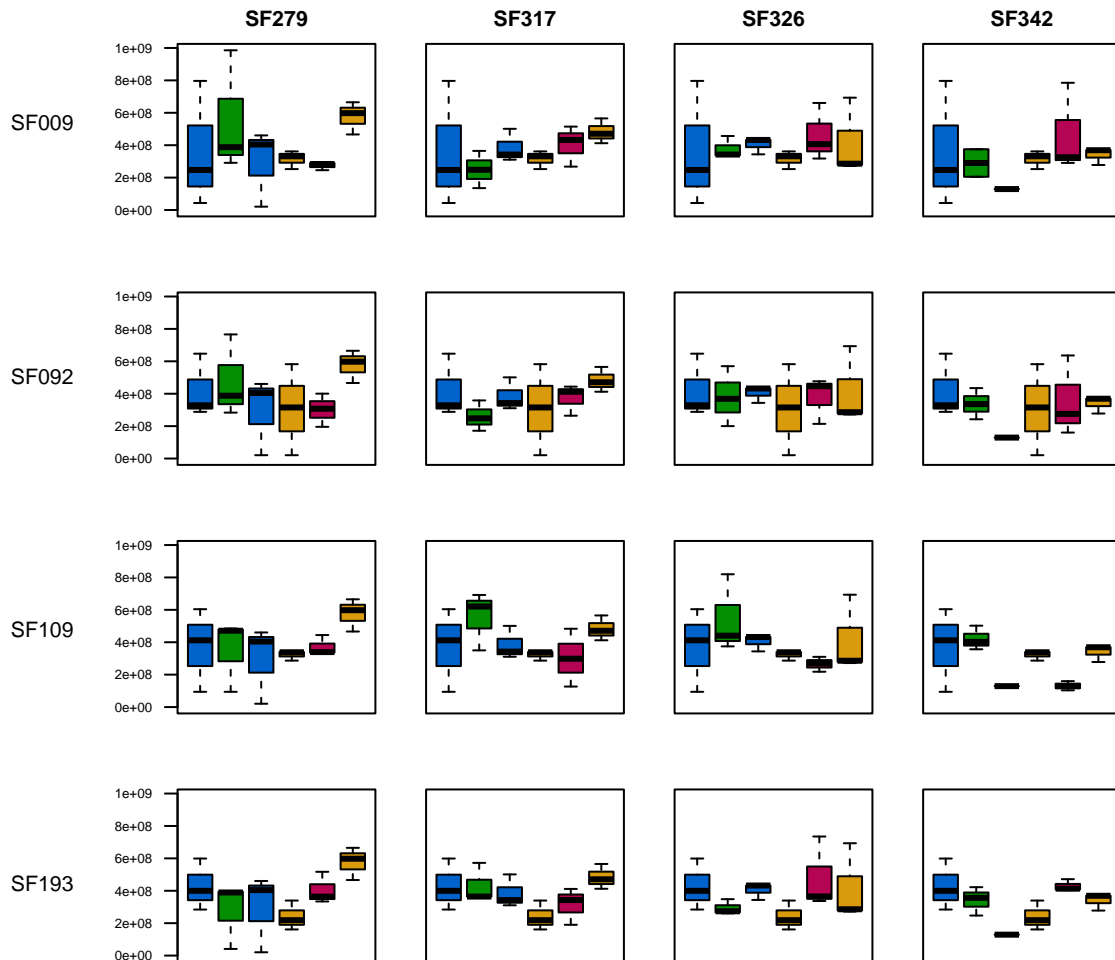



HanXRQChr09g0255141  
Uncharacterized protein, supported by  
expression data

Parents WW  
Parents WD  
Hybrids WW  
Hybrids WD

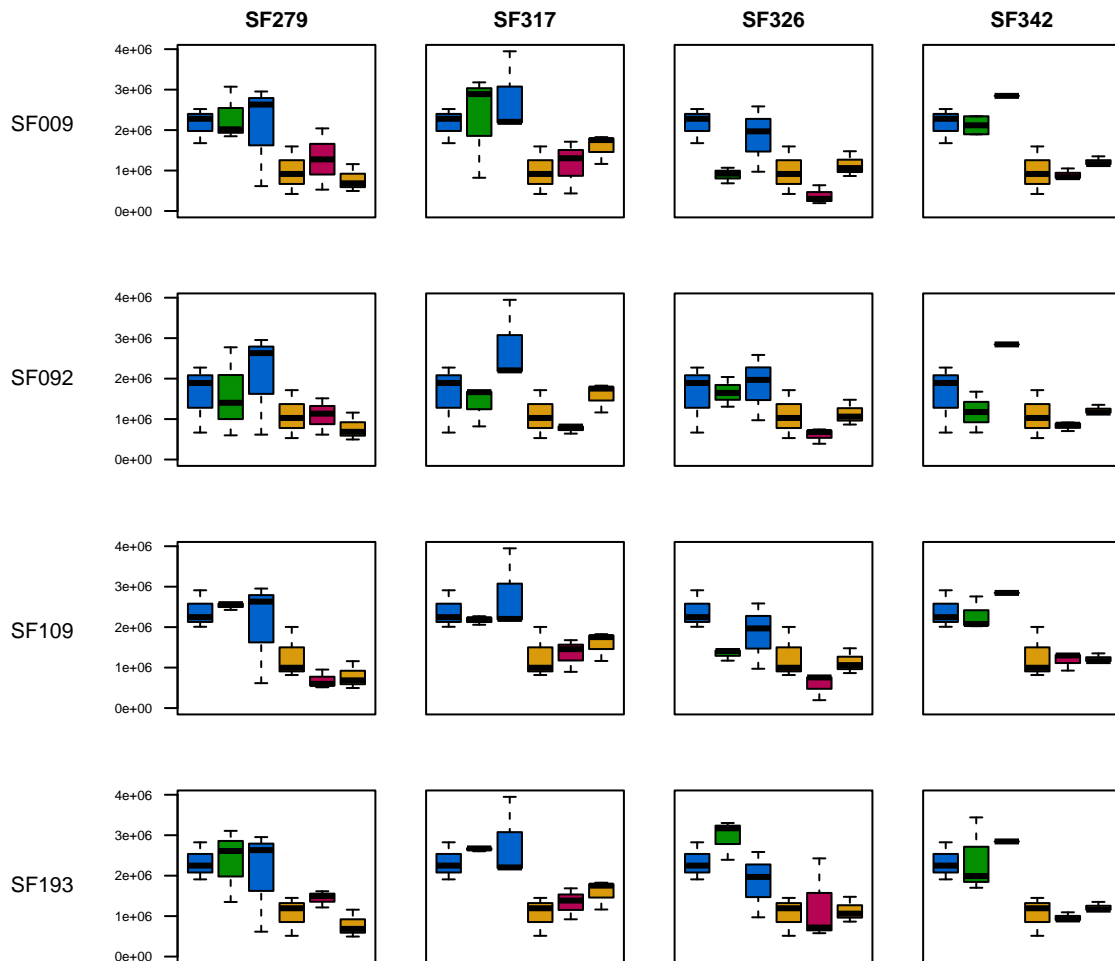

HanXRQChr09g0272941  
Putative glyceraldehyde/Erythrose  
phosphate dehydrogenase family

Parents WW  
Parents WD  
Hybrids WW  
Hybrids WD

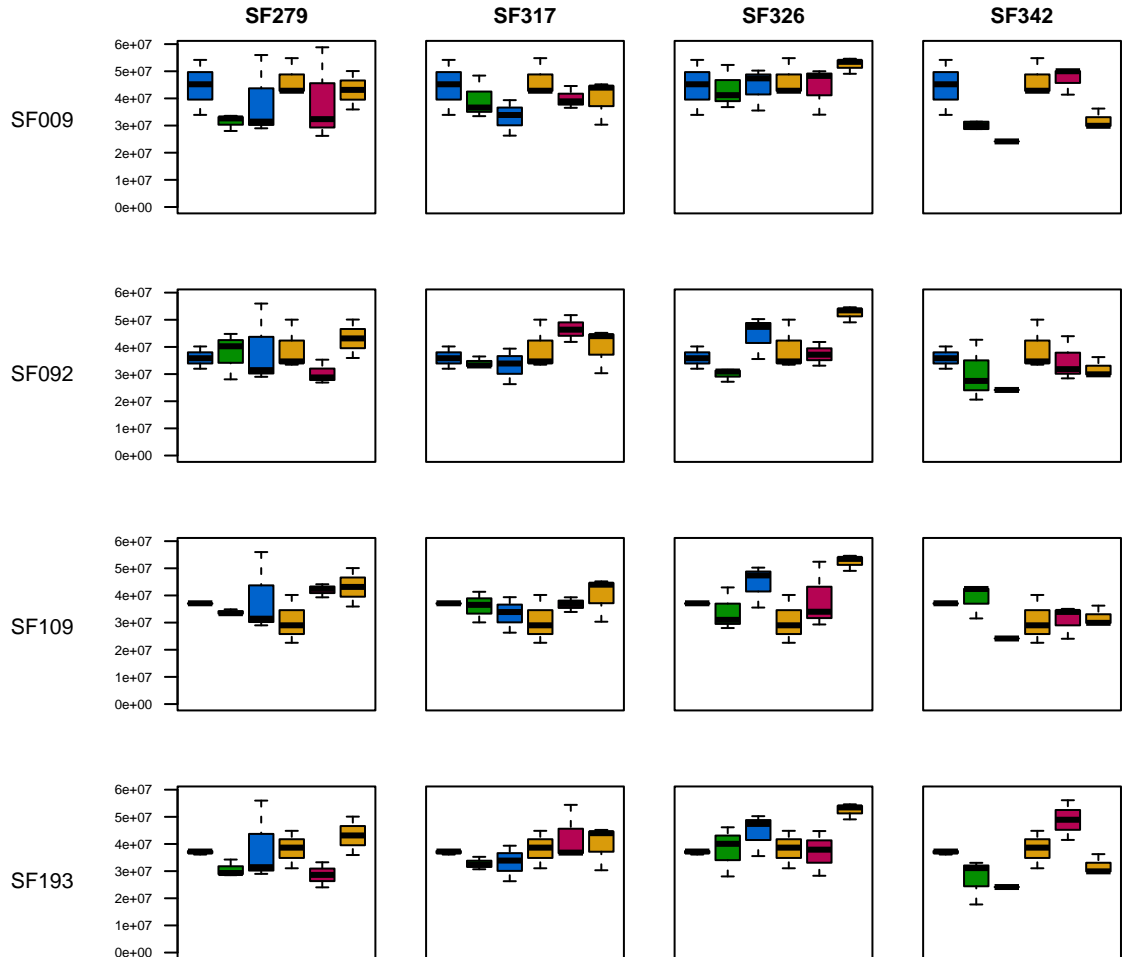

HanXRQChr14g0451091  
Putative nucleotide-binding alpha-beta  
plait domain

Parents WW  
Parents WD  
Hybrids WW  
Hybrids WD

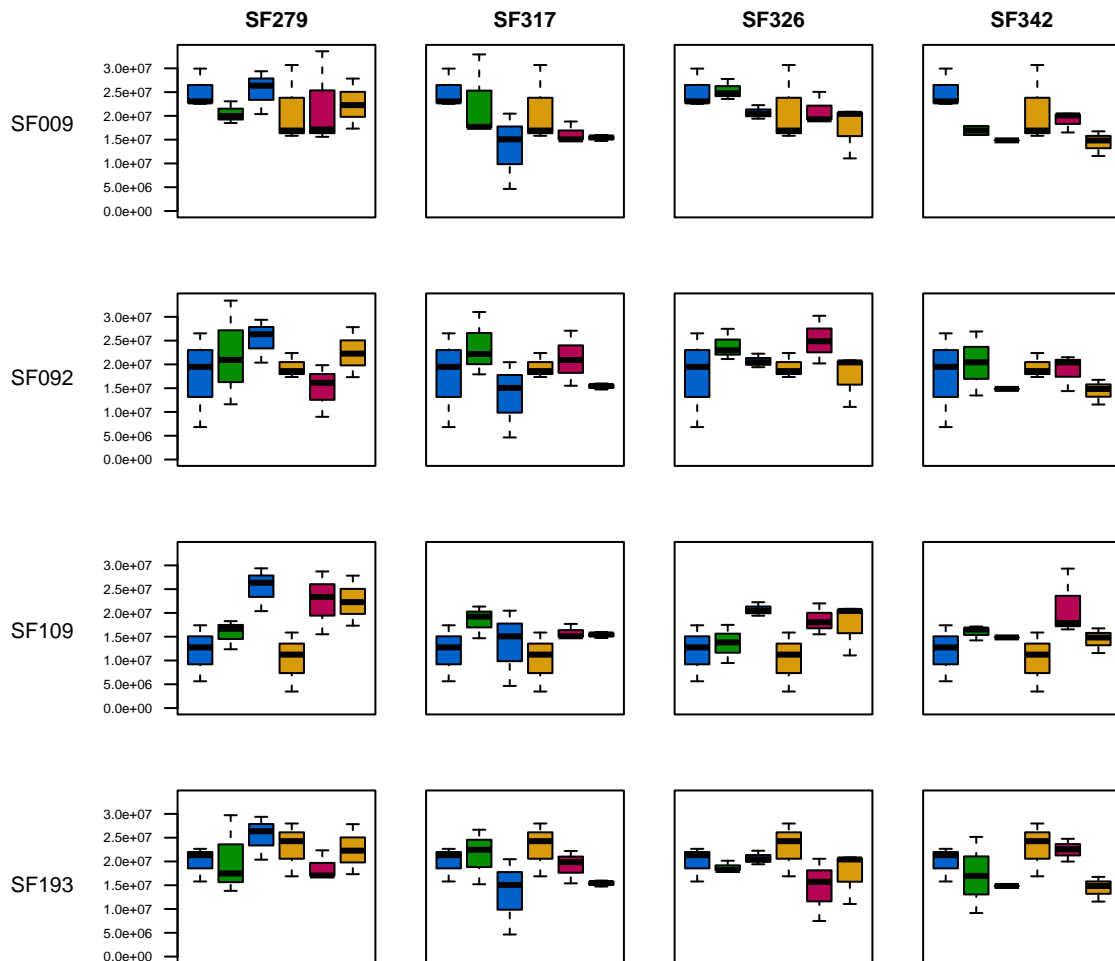

HanXRQChr17g0554911  
Putative prohibitin; Band 7 domain

Parents WW  
Parents WD  
Hybrids WW  
Hybrids WD

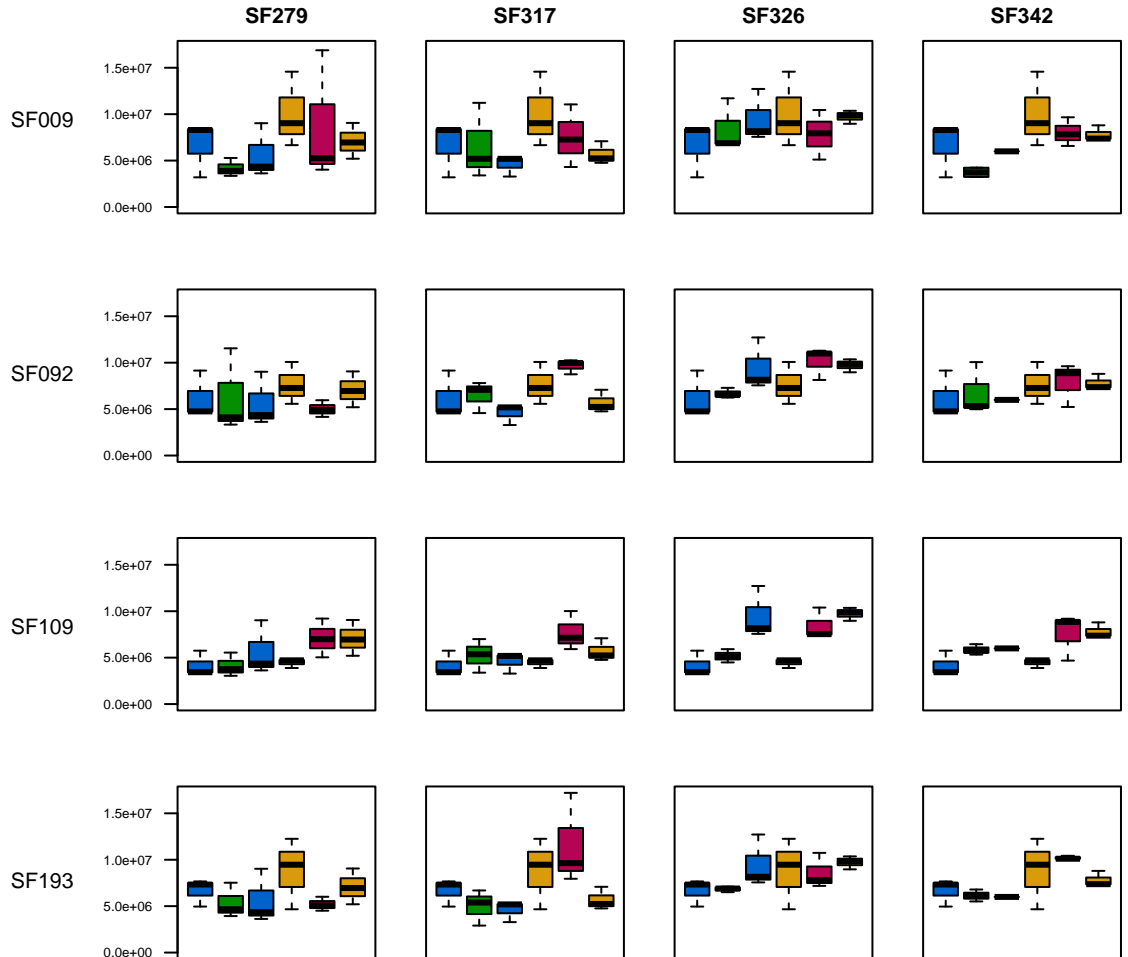

HanXRQChr12g0378191  
Probable ATP binding;leucine-tRNA  
ligases;aminoacyl-tRNA ligases;nucleotide

Parents WW  
Parents WD  
Hybrids WW  
Hybrids WD

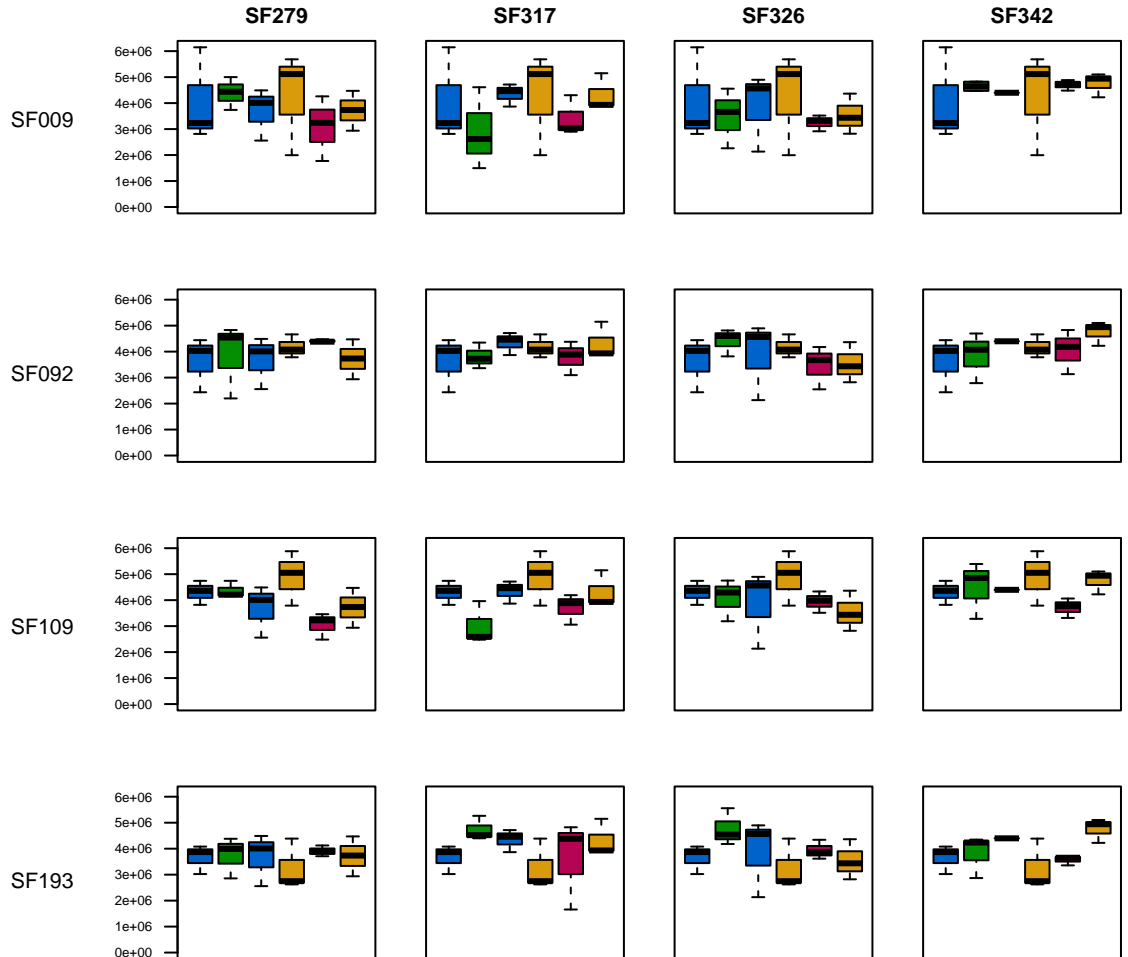

HanXRQChr02g0055691  
Probable beta-galactosidase 8

Parents WW  
Parents WD  
Hybrids WW  
Hybrids WD

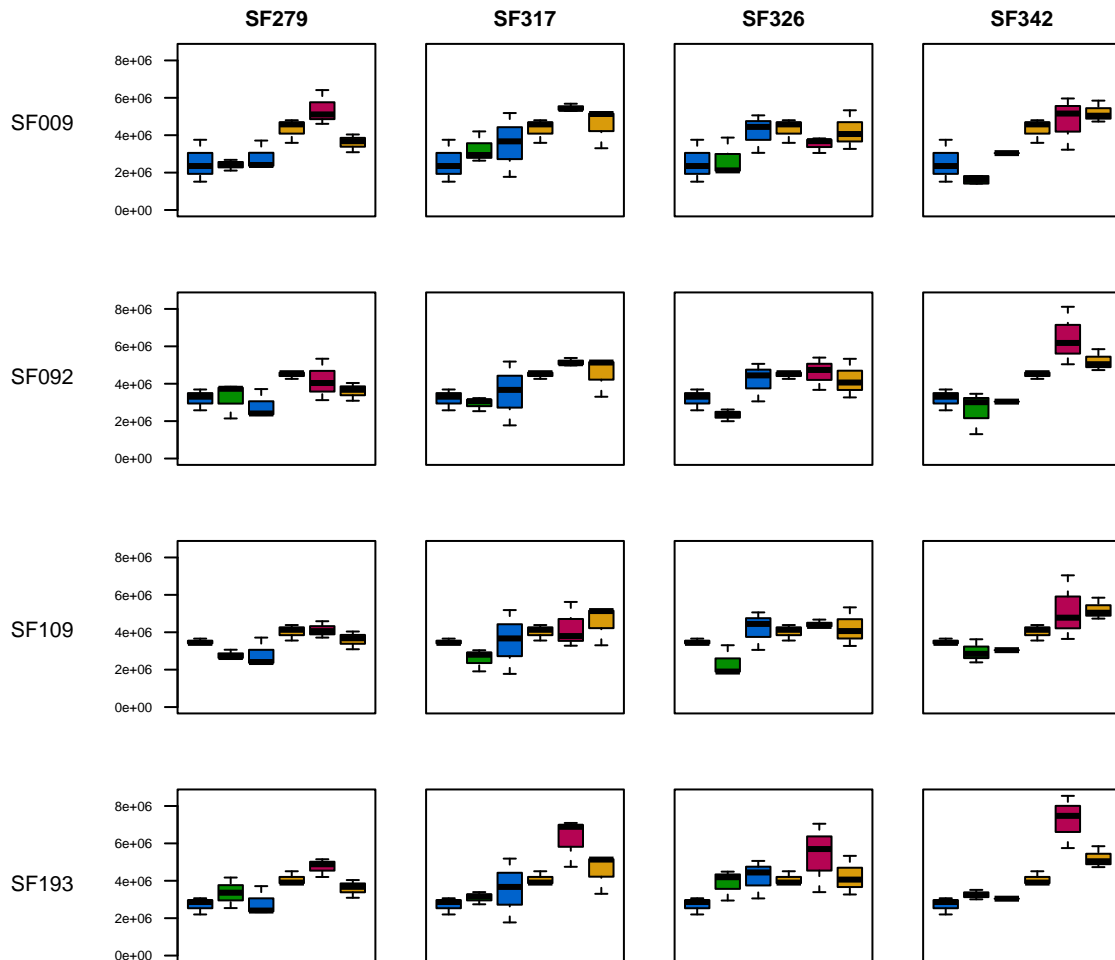

HanXRQChr17g0556431  
Probable  
amidophosphoribosyltransferase, chloropla:

Parents WW  
Parents WD  
Hybrids WW  
Hybrids WD

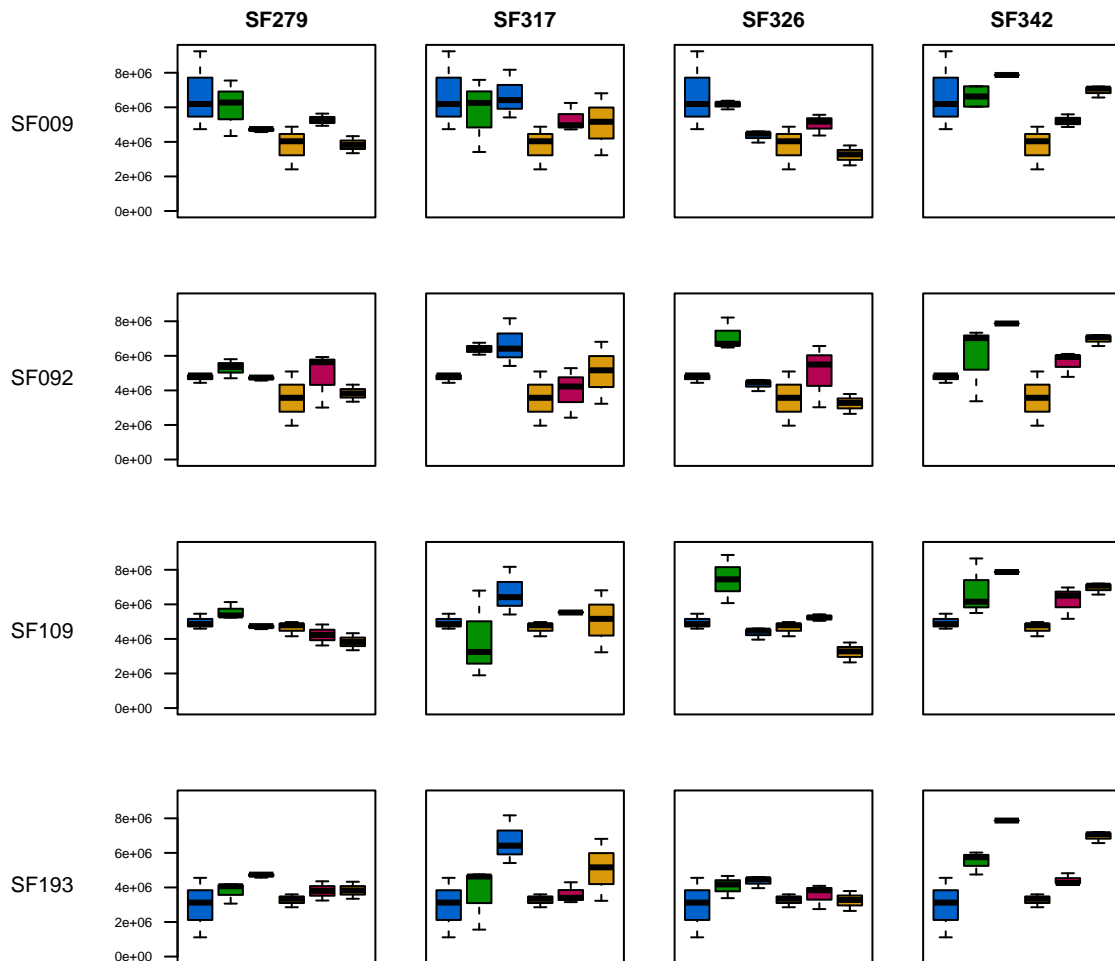

HanXRQChr15g0484401  
Probable 4- $\alpha$ -glucanotransferase,  
chloroplastic/amyloplastic

Parents WW  
Parents WD  
Hybrids WW  
Hybrids WD

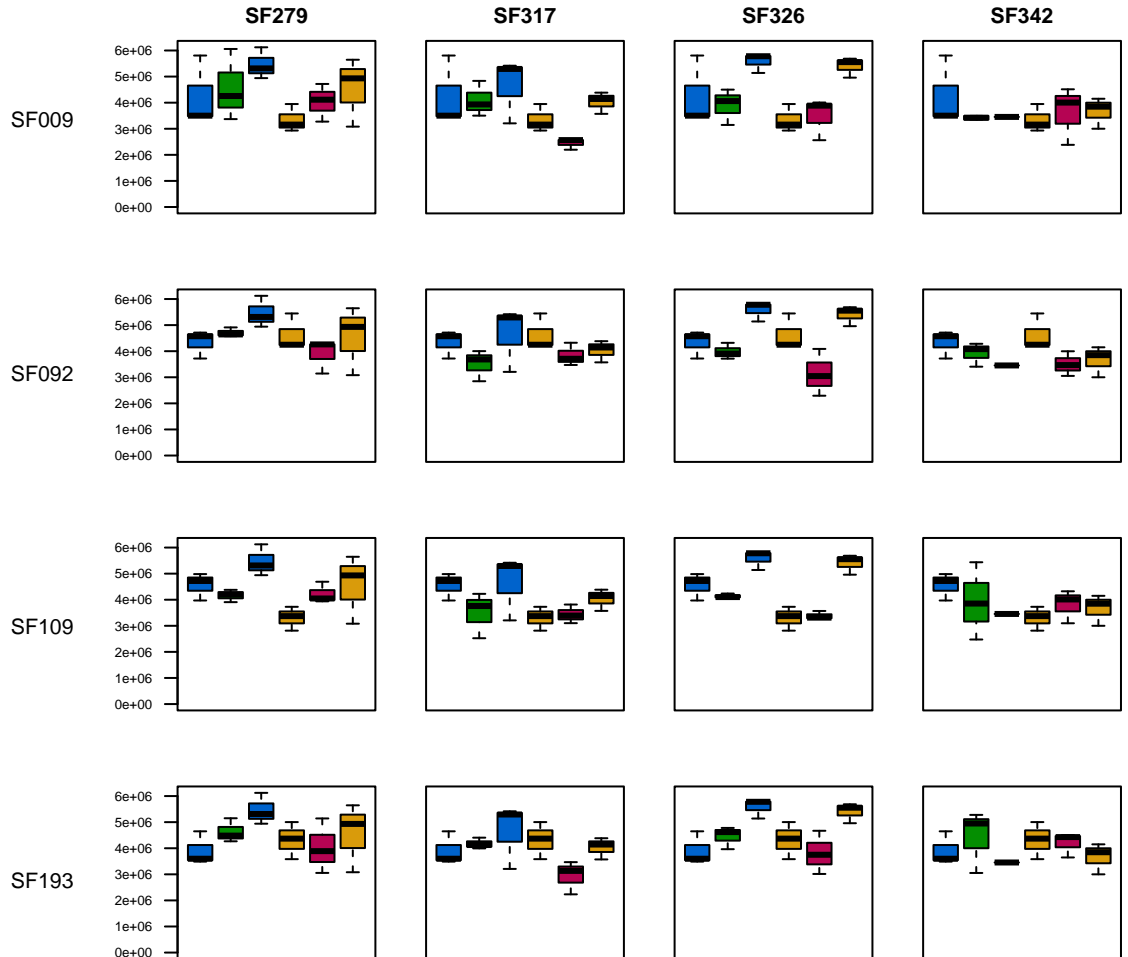



HanXRQChr02g0059341  
 Probable RNA-binding (RRM/RBD/RNP  
 motifs) family protein

Parents WW  
 Parents WD  
 Hybrids WW  
 Hybrids WD

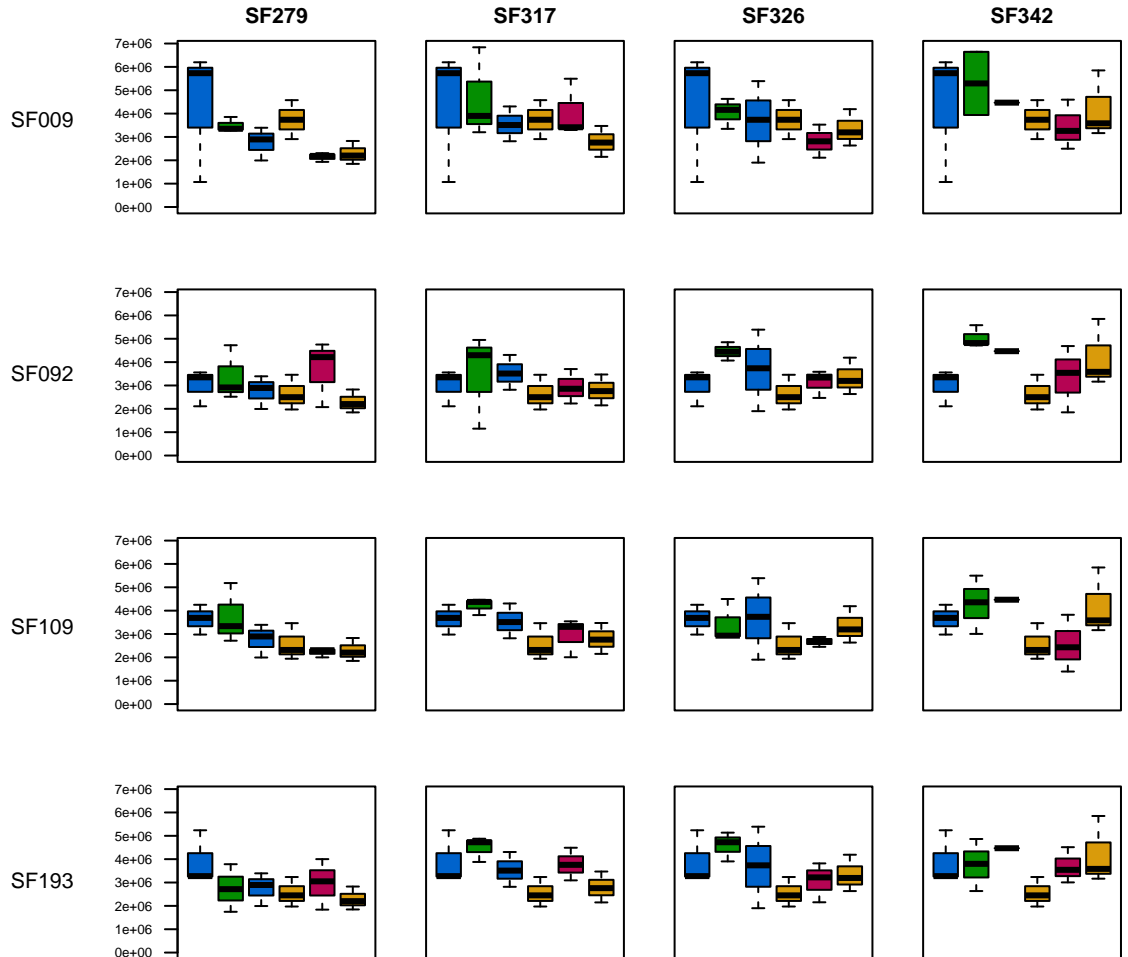

HanXRQChr02g0047051  
Putative GRAM domain

Parents WW  
Parents WD  
Hybrids WW  
Hybrids WD

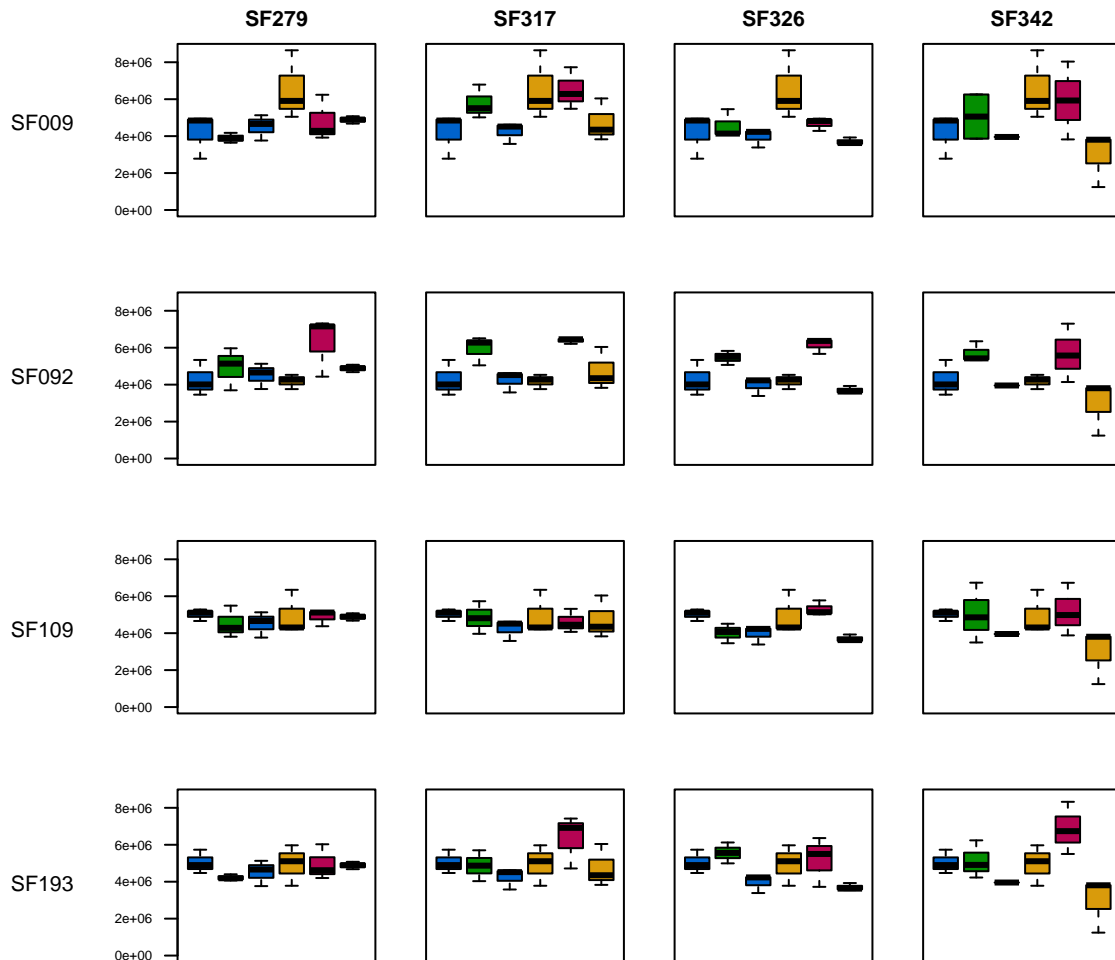

HanXRQChr06g0185051  
 Probable plastid-lipid associated  
 protein PAP / fibrillin family protein

Parents WW  
 Parents WD  
 Hybrids WW  
 Hybrids WD

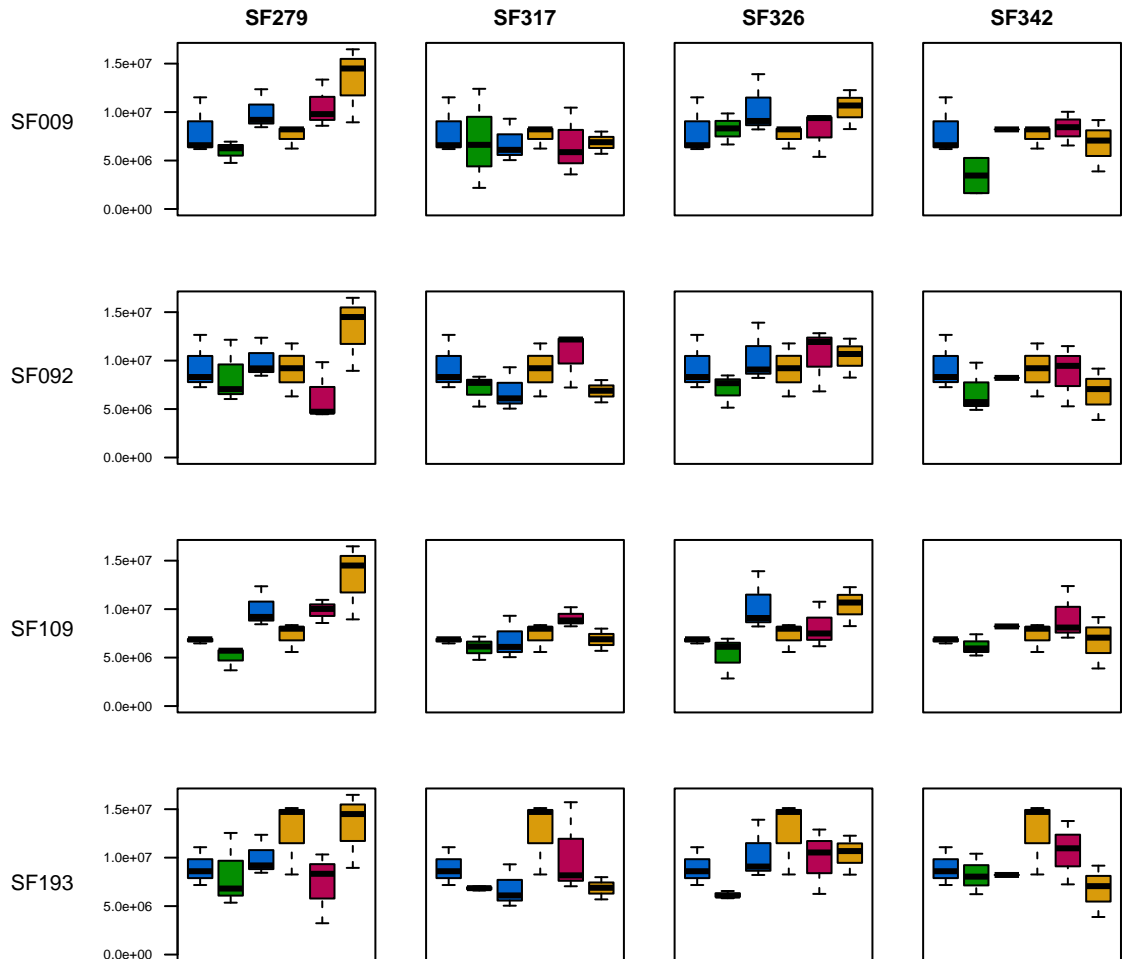

HanXRQChr03g0088611  
Probable small heat shock protein,  
chloroplastic

Parents WW  
Parents WD  
Hybrids WW  
Hybrids WD

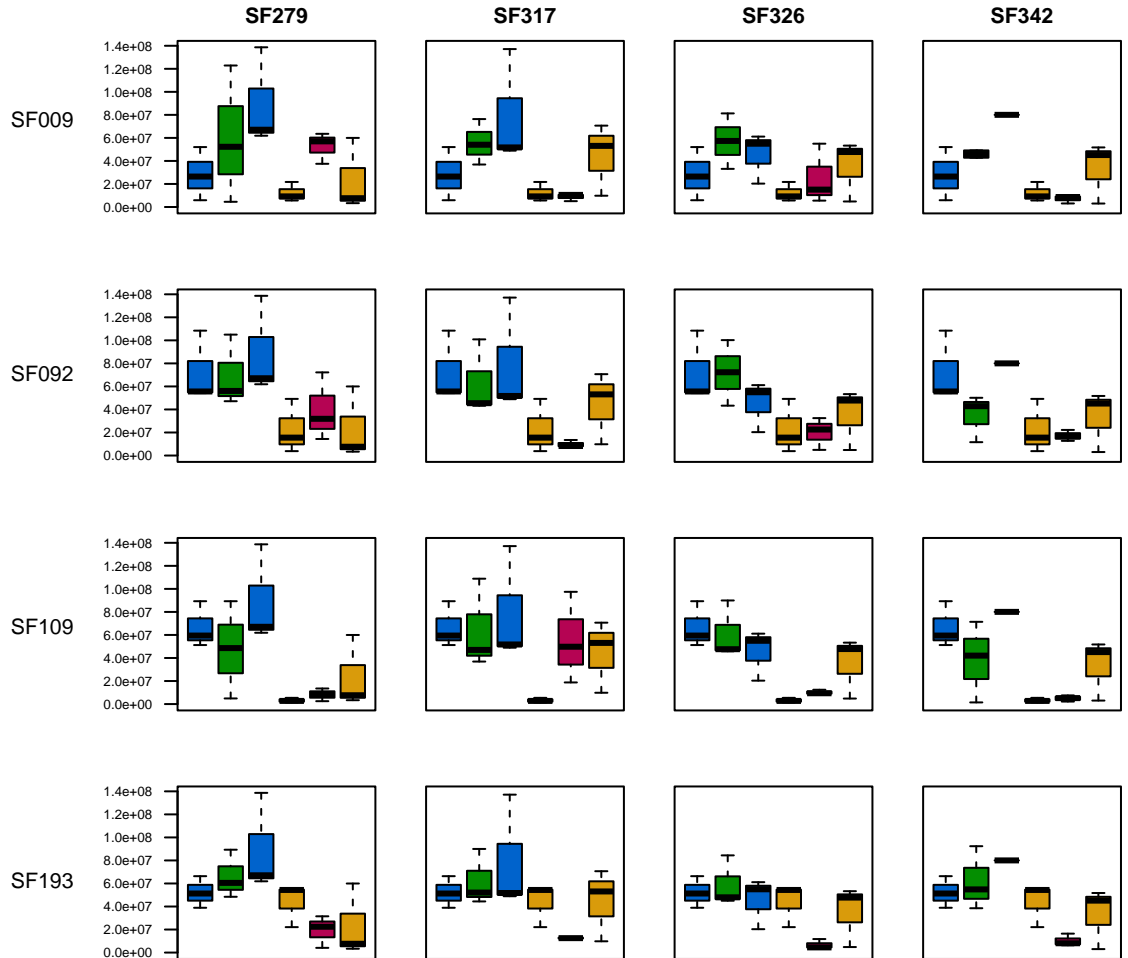

HanXRQChr06g0167231  
 Probable glycine cleavage system H  
 protein, mitochondrial

Parents WW  
 Parents WD  
 Hybrids WW  
 Hybrids WD

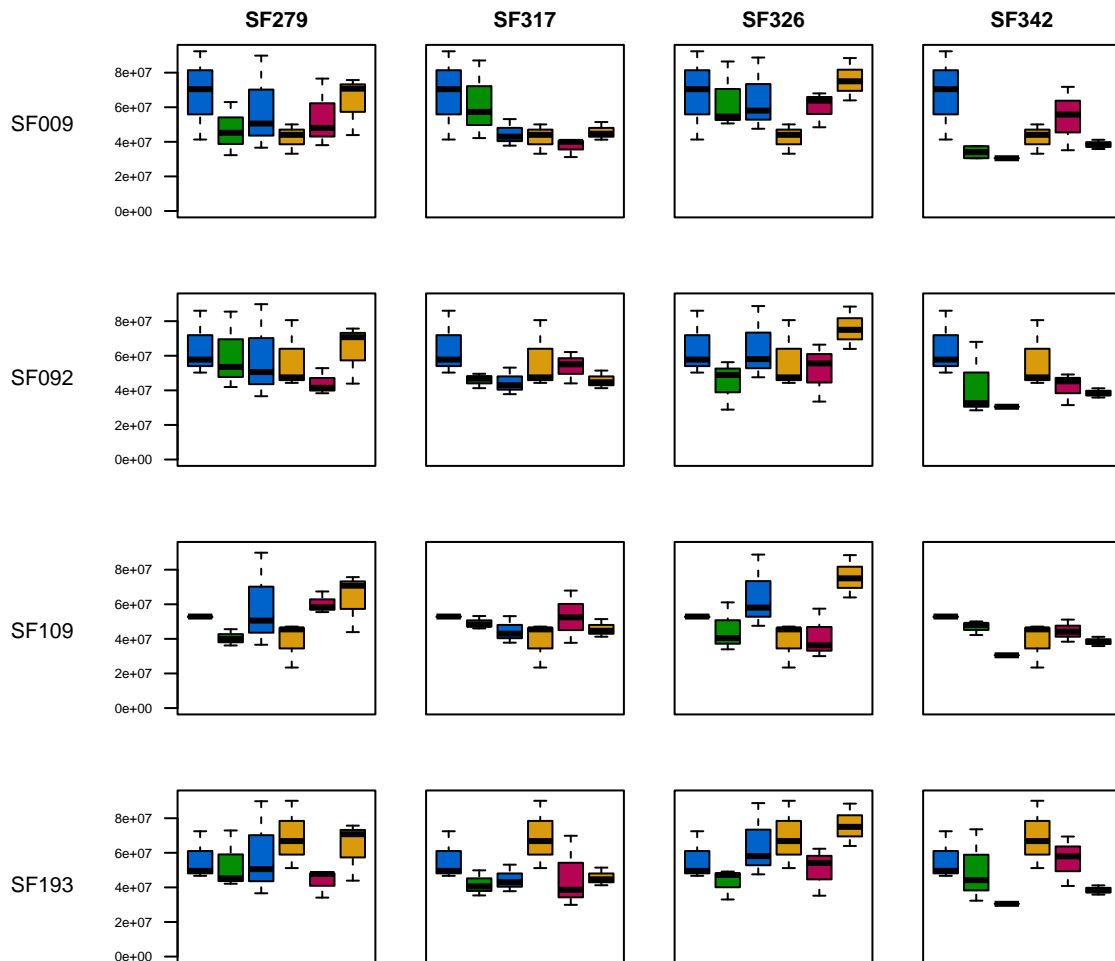

HanXRQChr01g0016761  
 Probable  
 phosphoglycerate/bisphosphoglycerate mut

Parents WW  
 Parents WD  
 Hybrids WW  
 Hybrids WD

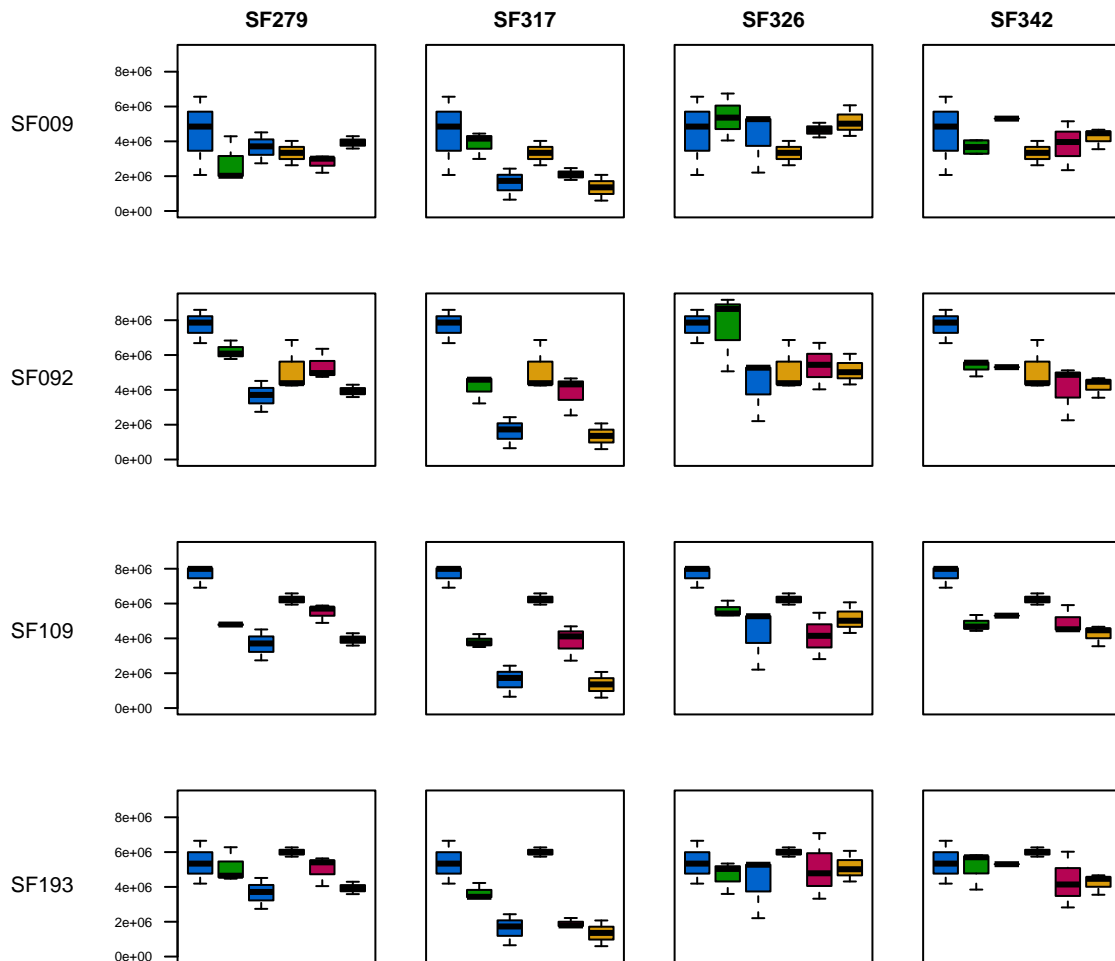

HanXRQChr05g0144801  
Probable glyceraldehyde-3-phosphate  
dehydrogenase B, chloroplastic

Parents WW  
Parents WD  
Hybrids WW  
Hybrids WD

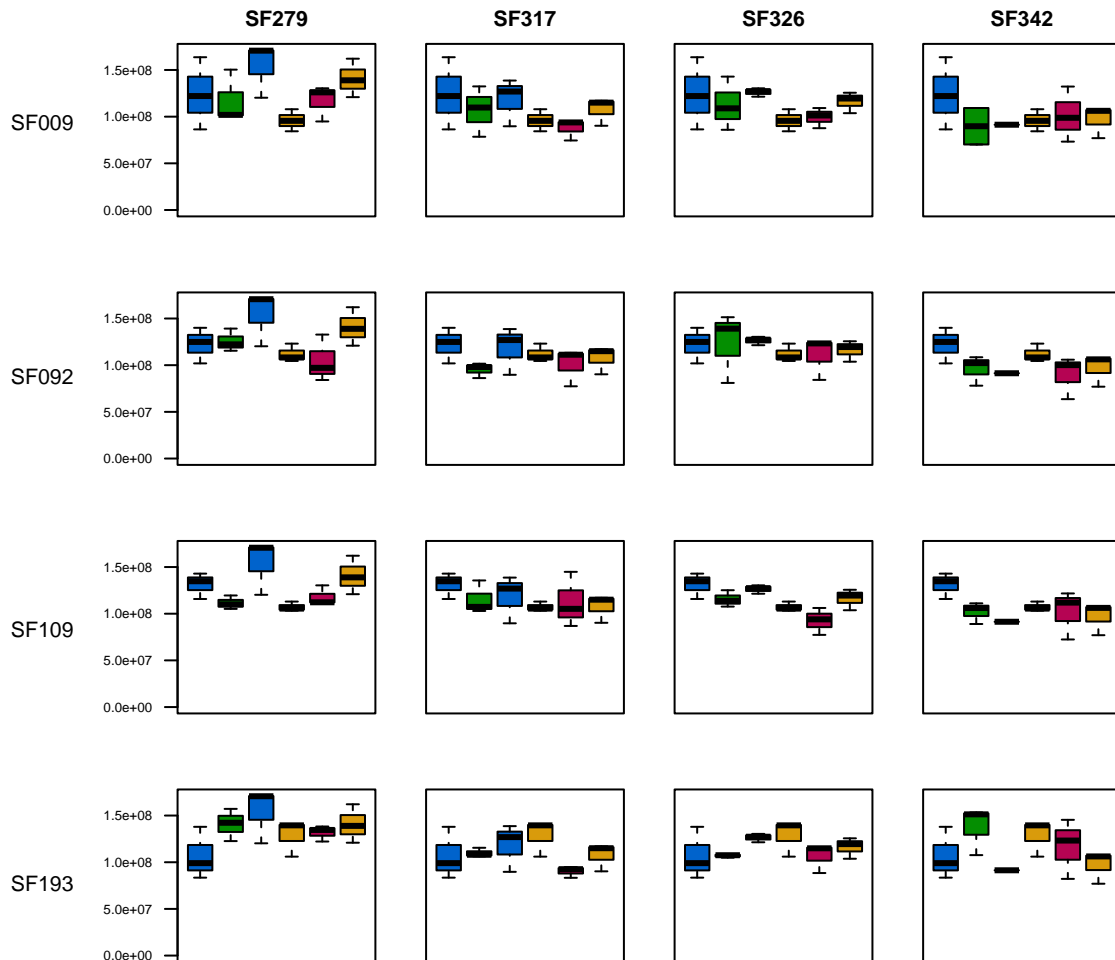

HanXRQCPg0579921  
Putative photosystem I PsA/PsaB;  
N-terminal acetyltransferase A, auxiliary su

Parents WW  
Parents WD  
Hybrids WW  
Hybrids WD

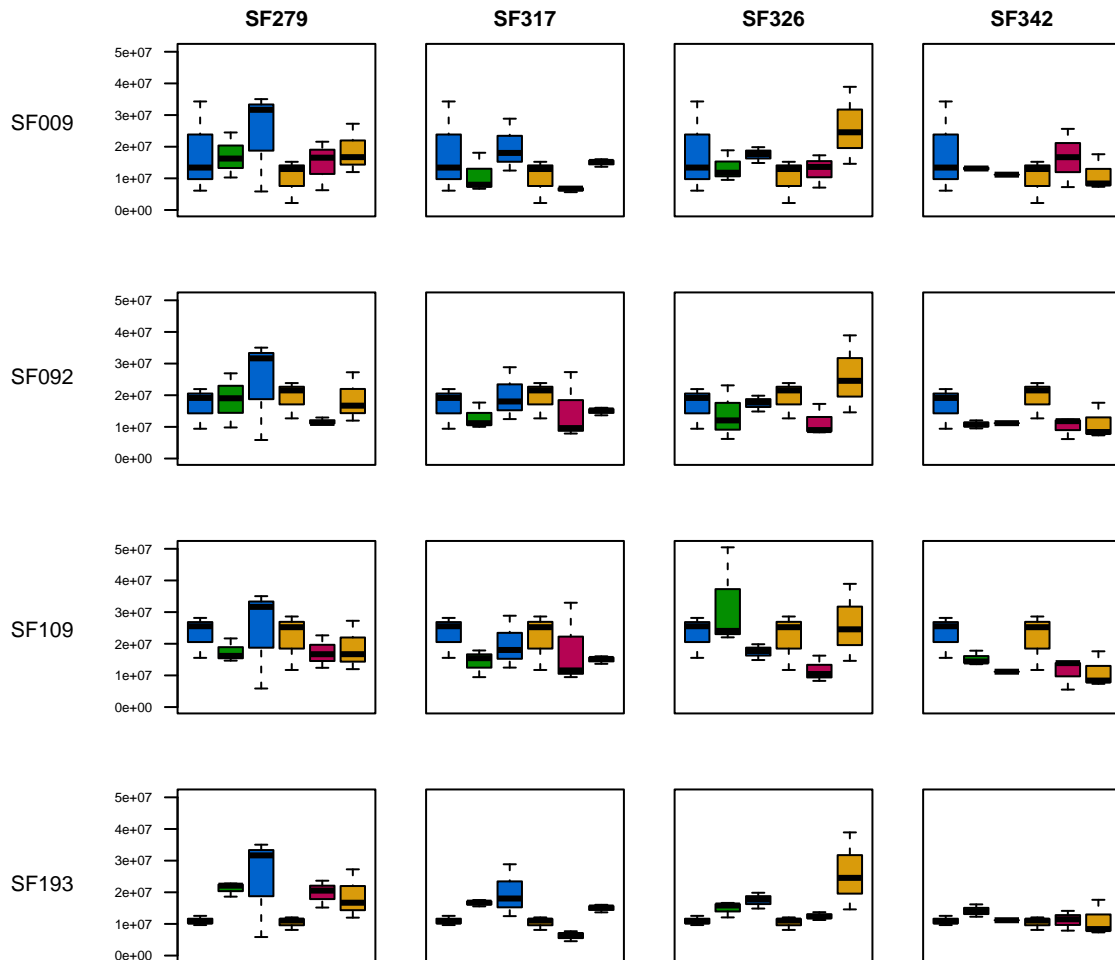



HanXRQChr05g0158941  
Putative proteinase inhibitor I3,  
Kunitz legume

■ Parents WW  
■ Parents WD  
■ Hybrids WW  
■ Hybrids WD

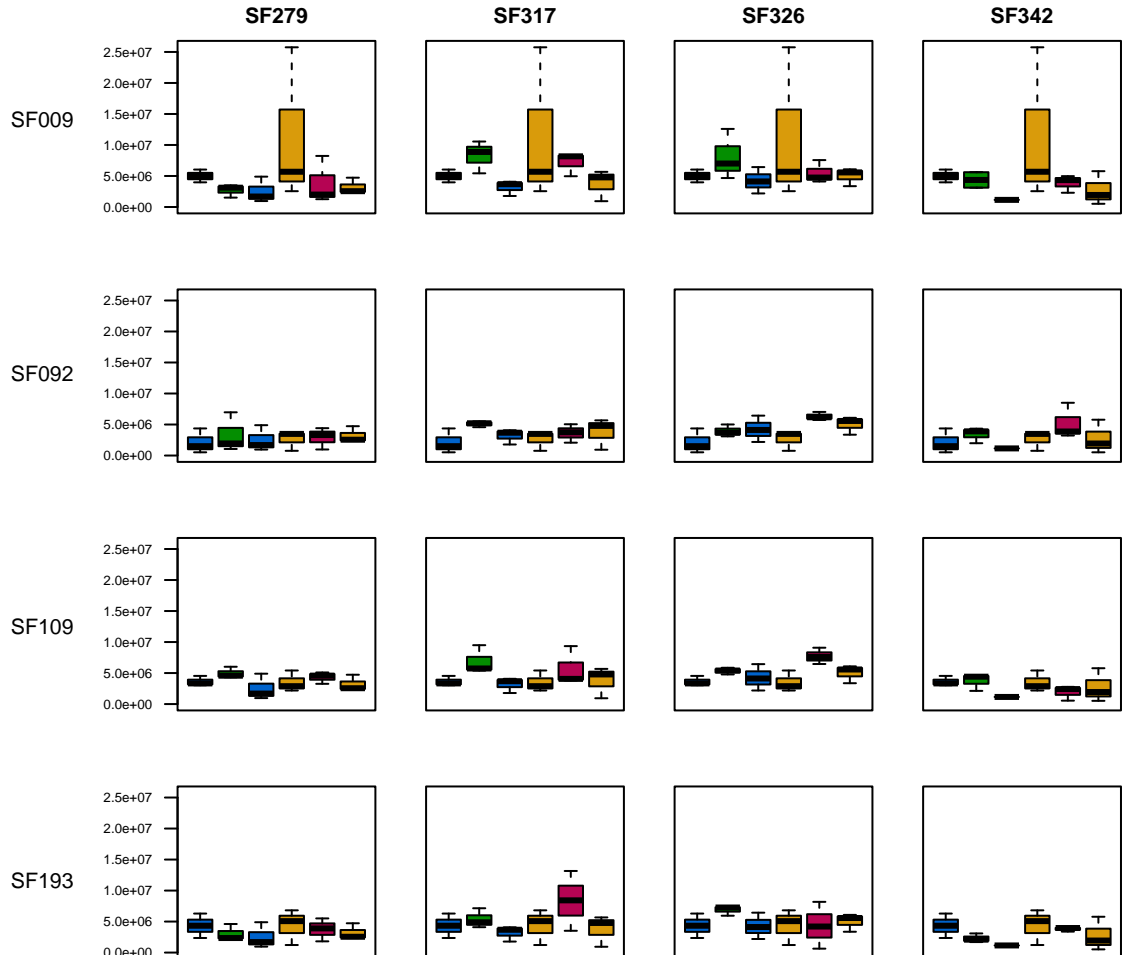

HanXRQChr06g0175631  
Putative rhodanese-like domain

- Parents WW
- Parents WD
- Hybrids WW
- Hybrids WD

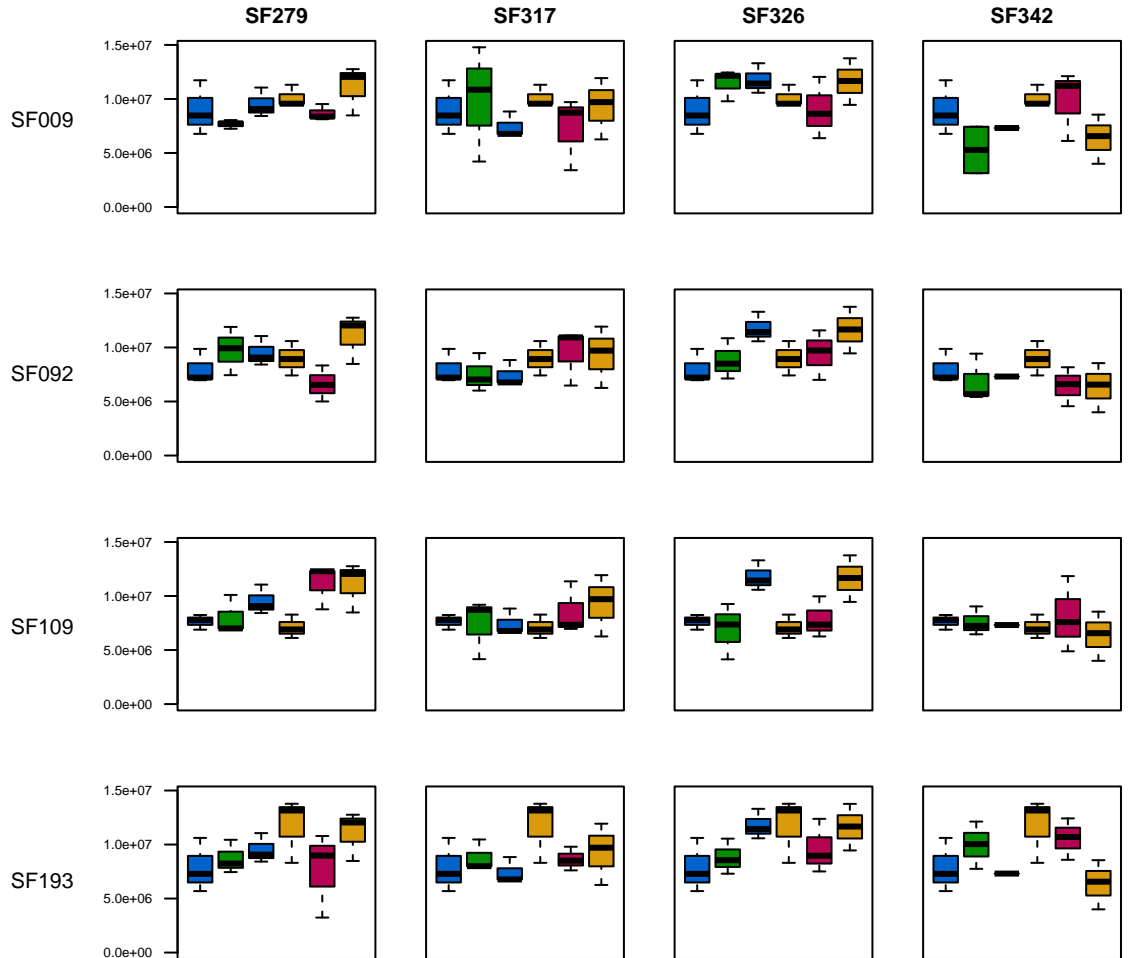

HanXRQChr05g0149801  
Probable proteasome subunit beta type-3

Parents WW  
Parents WD  
Hybrids WW  
Hybrids WD

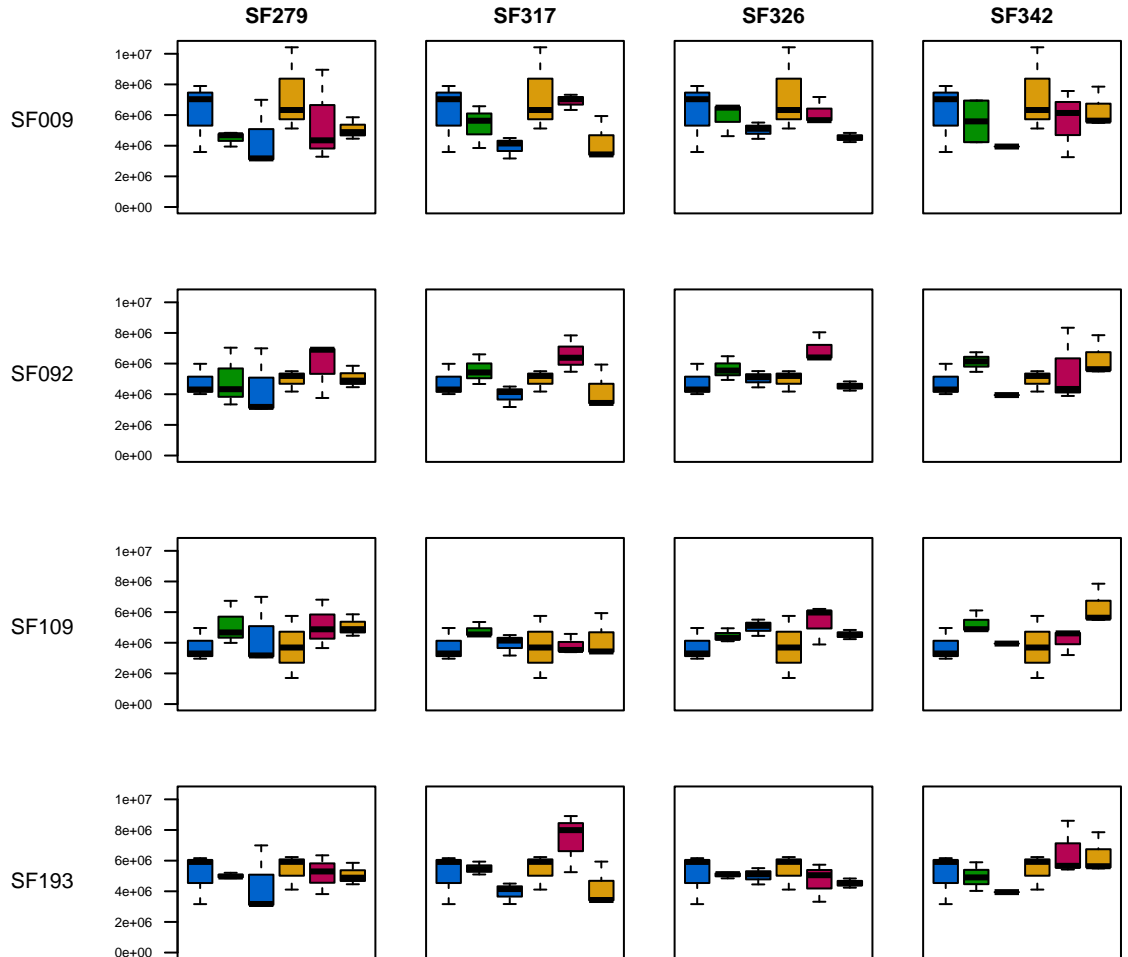

HanXRQChr14g0453431  
 Uncharacterized protein, conserved in  
 plant genome(s), supported by expression c

Parents WW  
 Parents WD  
 Hybrids WW  
 Hybrids WD

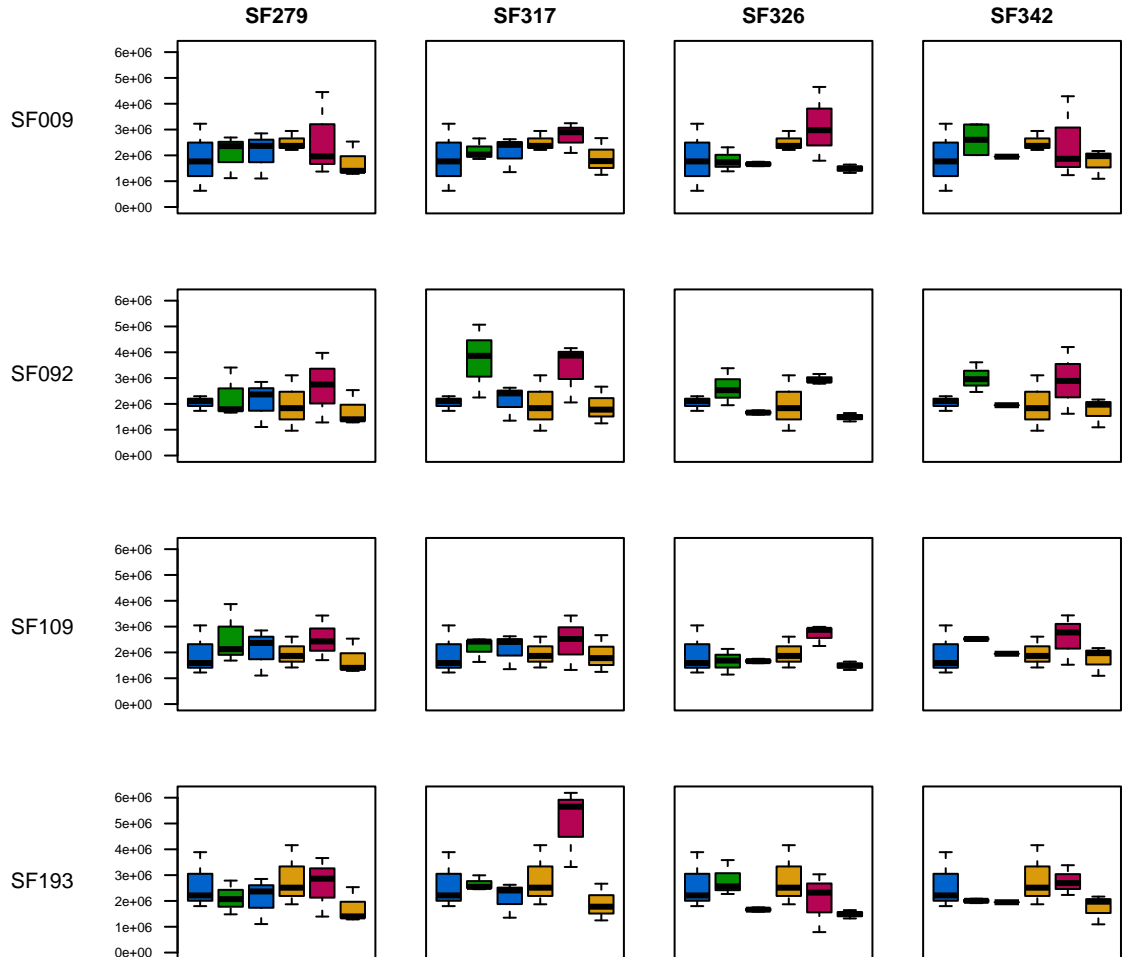

HanXRQChr14g0450701  
 Probable ribosomal protein S21 family  
 protein

Parents WW  
 Parents WD  
 Hybrids WW  
 Hybrids WD

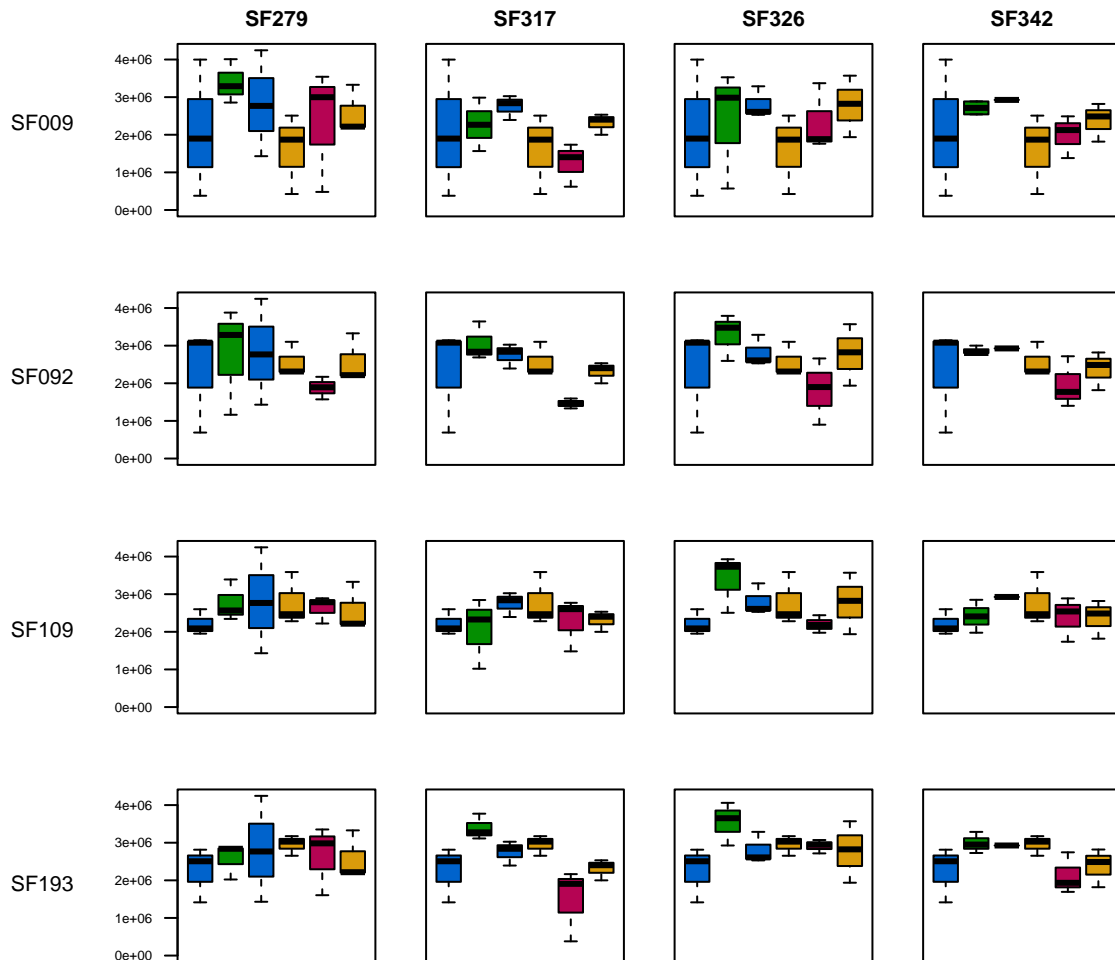

HanXRQChr02g0048731  
 Putative chaperonin Cpn60/TCP-1 family;  
 T-complex protein 1, beta subunit; GroEL

Parents WW  
 Parents WD  
 Hybrids WW  
 Hybrids WD

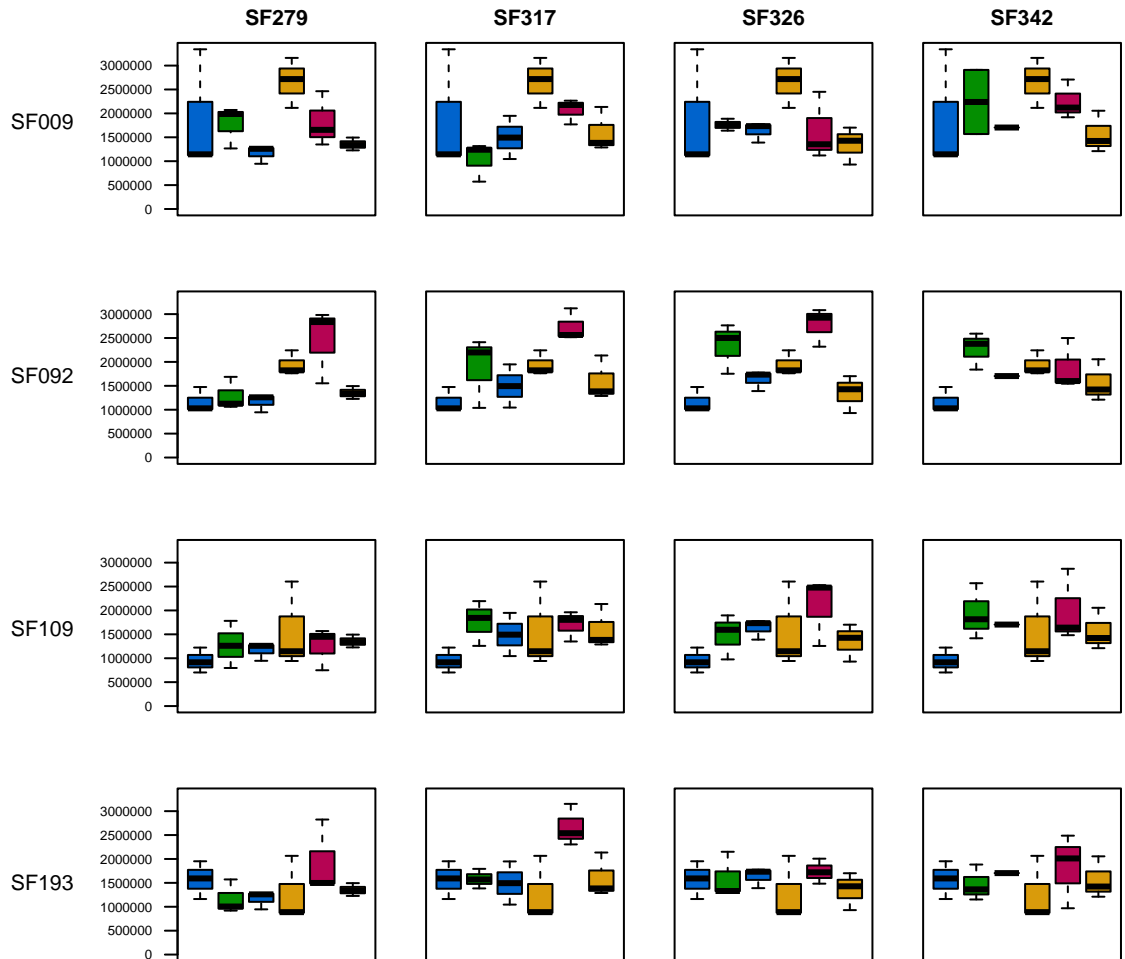

HanXRQChr10g0304171  
Probable tripeptidyl peptidase ii

Parents WW  
Parents WD  
Hybrids WW  
Hybrids WD

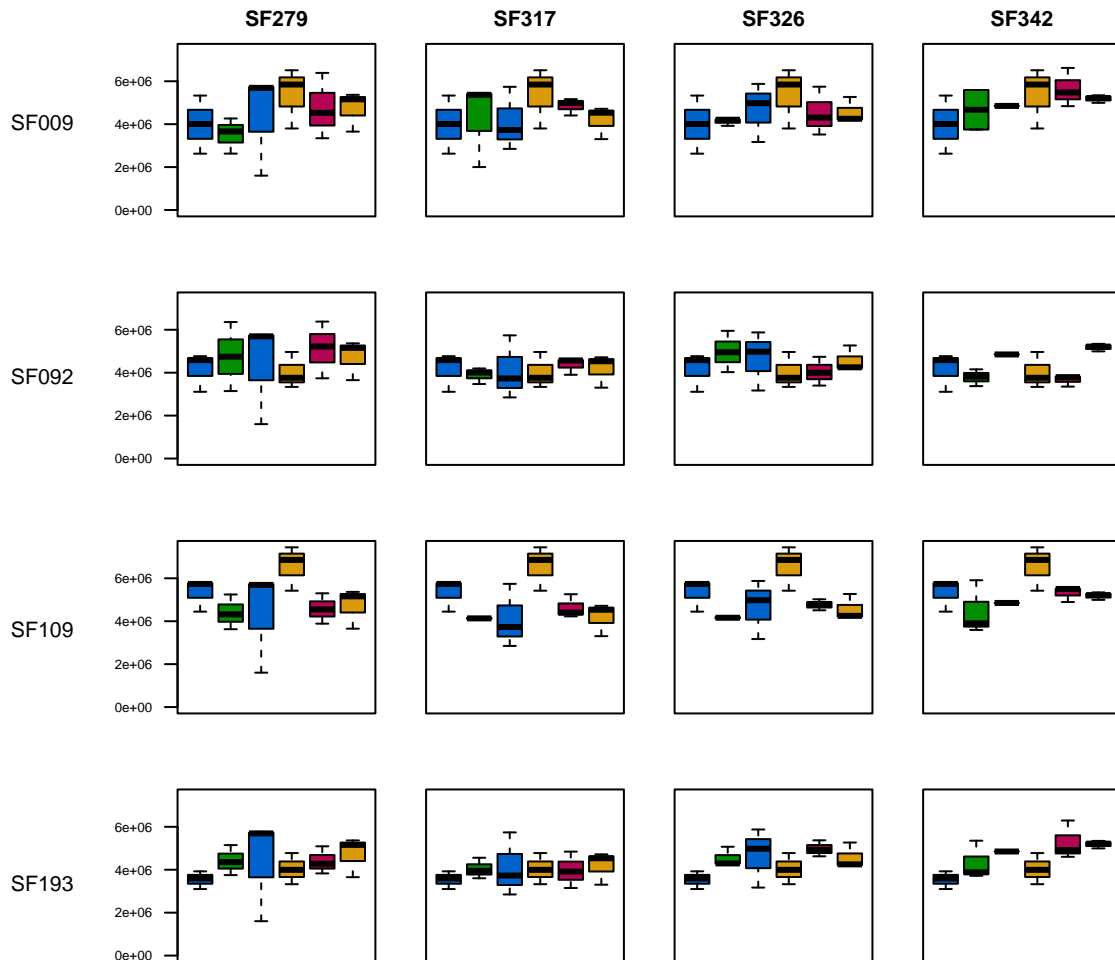

HanXRQChr02g0045151  
Probable NAD(P)H-quinone oxidoreductase  
subunit M, chloroplastic

Parents WW  
Parents WD  
Hybrids WW  
Hybrids WD

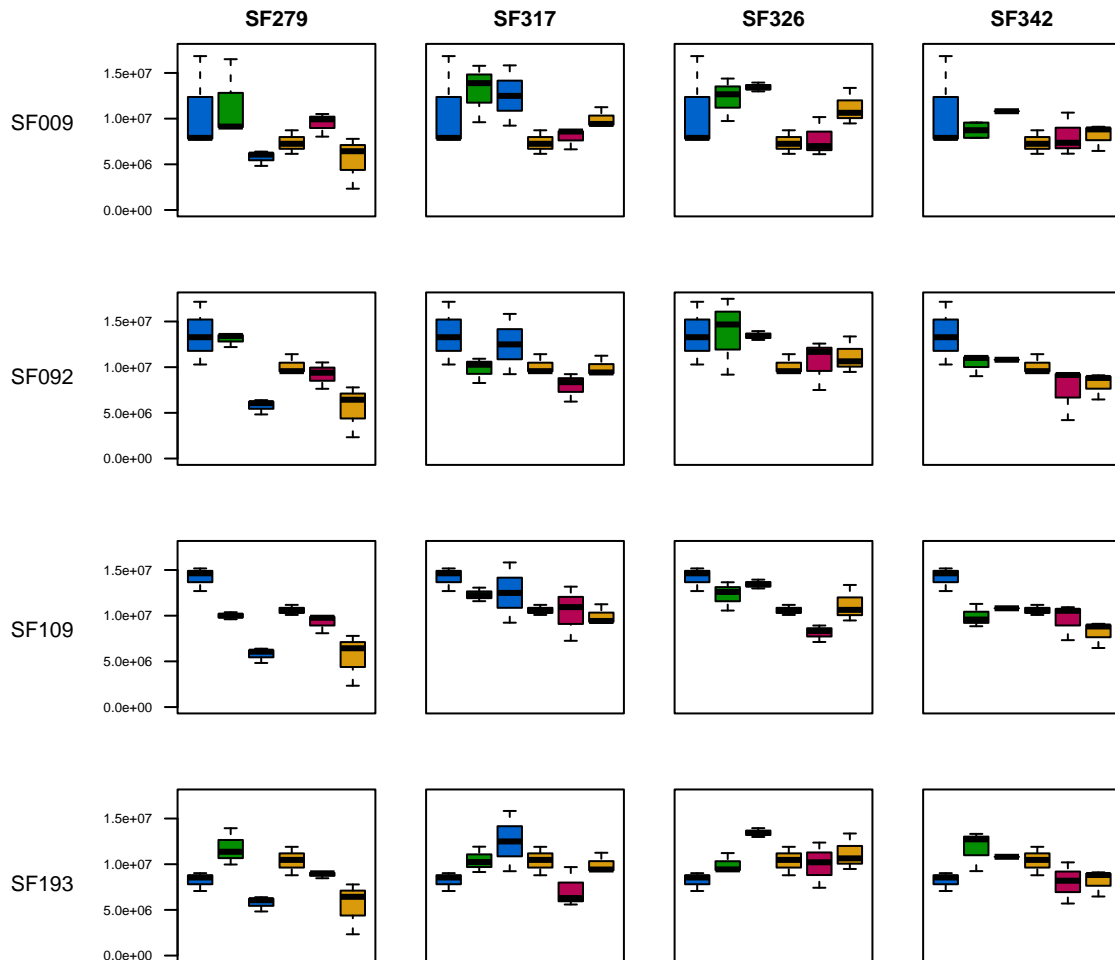



HanXRQChr09g0256531  
Probable glycosyl hydrolase family 38  
protein

Parents WW  
Parents WD  
Hybrids WW  
Hybrids WD

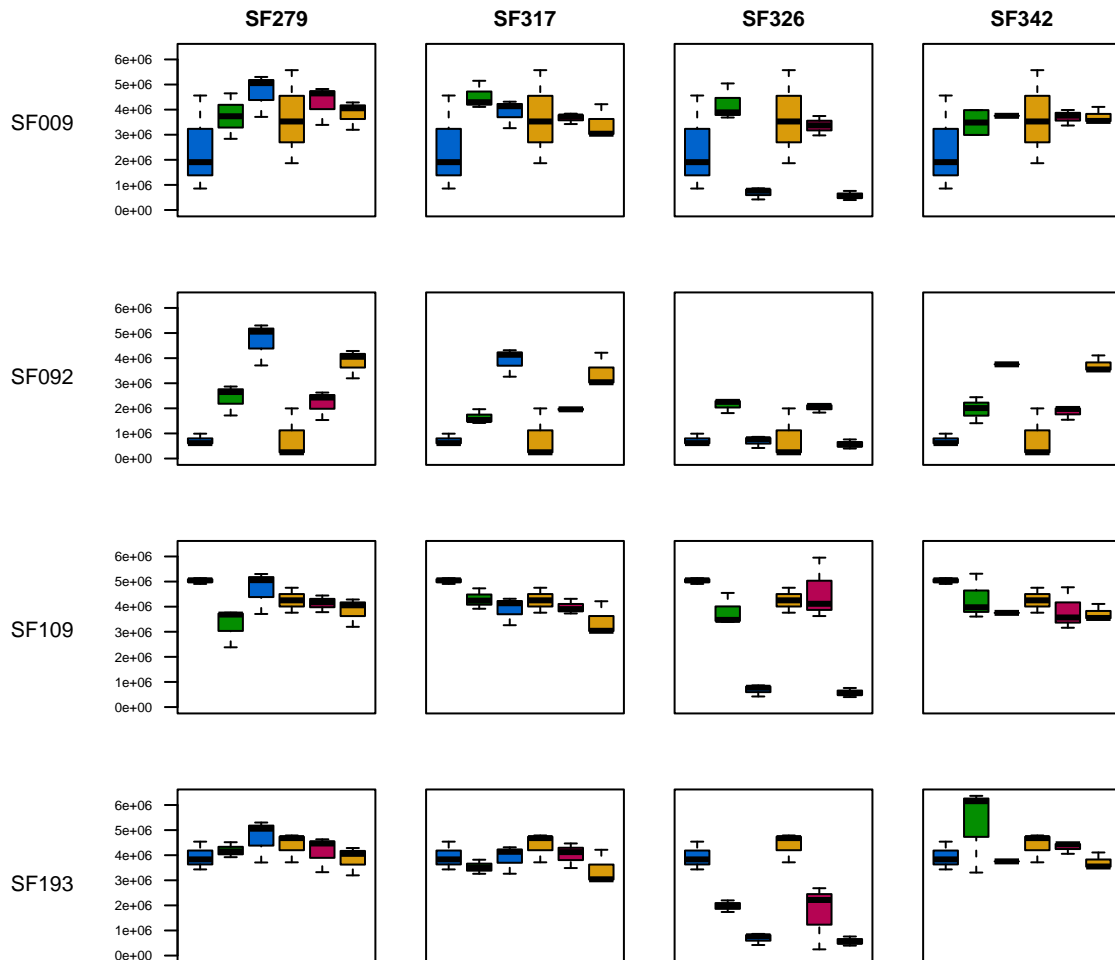

HanXRQChr15g0482381  
Probable UTP--glucose-1-phosphate  
uridylyltransferase

Parents WW  
Parents WD  
Hybrids WW  
Hybrids WD

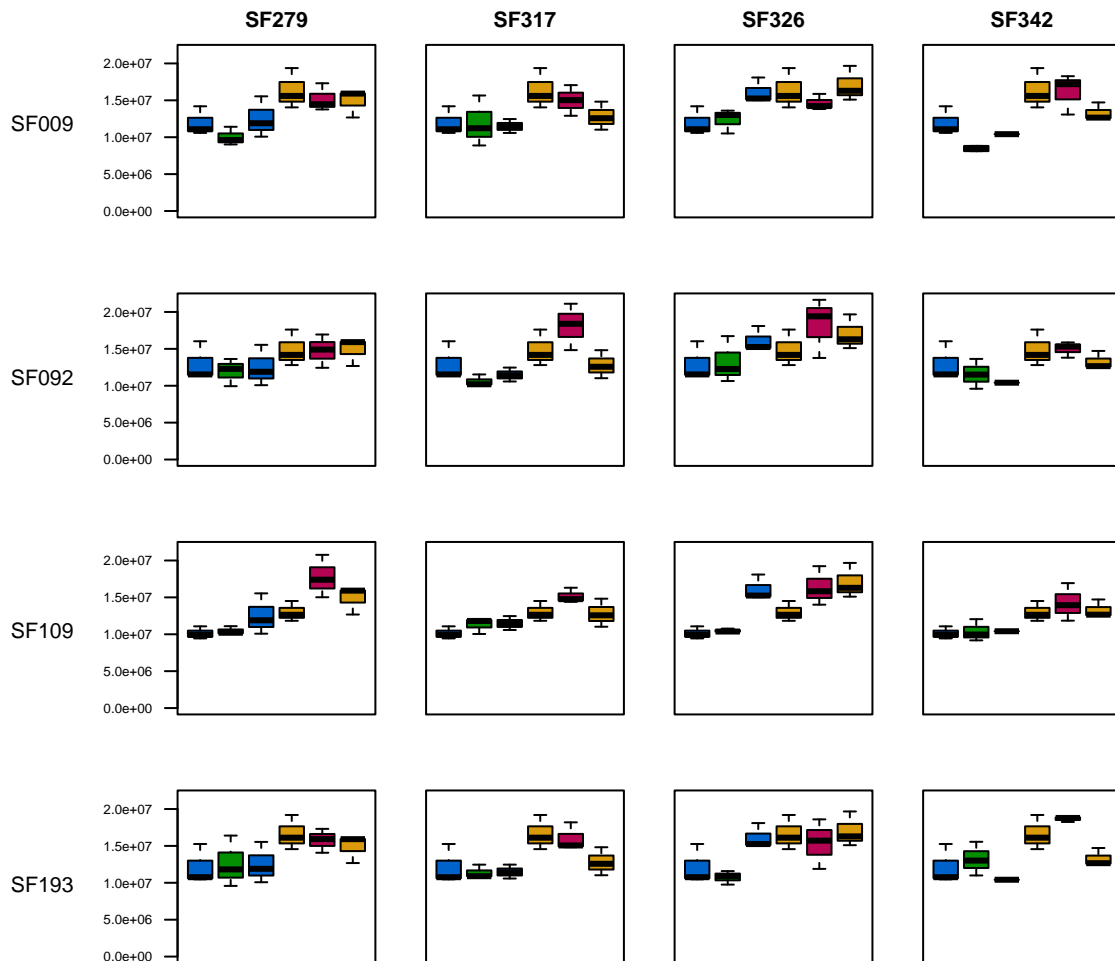

HanXRQChr09g0266161  
Probable degP protease 1

Parents WW  
Parents WD  
Hybrids WW  
Hybrids WD

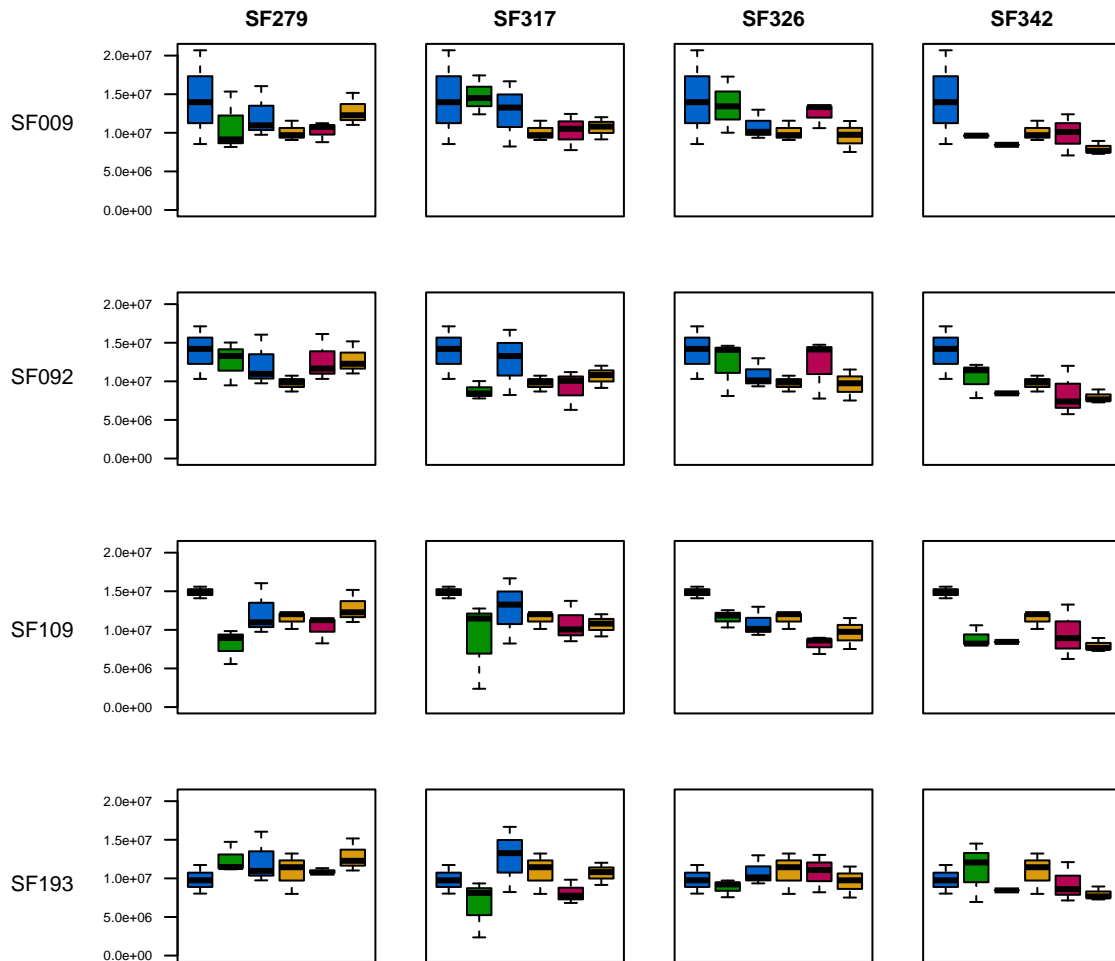

HanXRQChr11g0324971  
Probable 14-3-3-like protein

Parents WW  
Parents WD  
Hybrids WW  
Hybrids WD

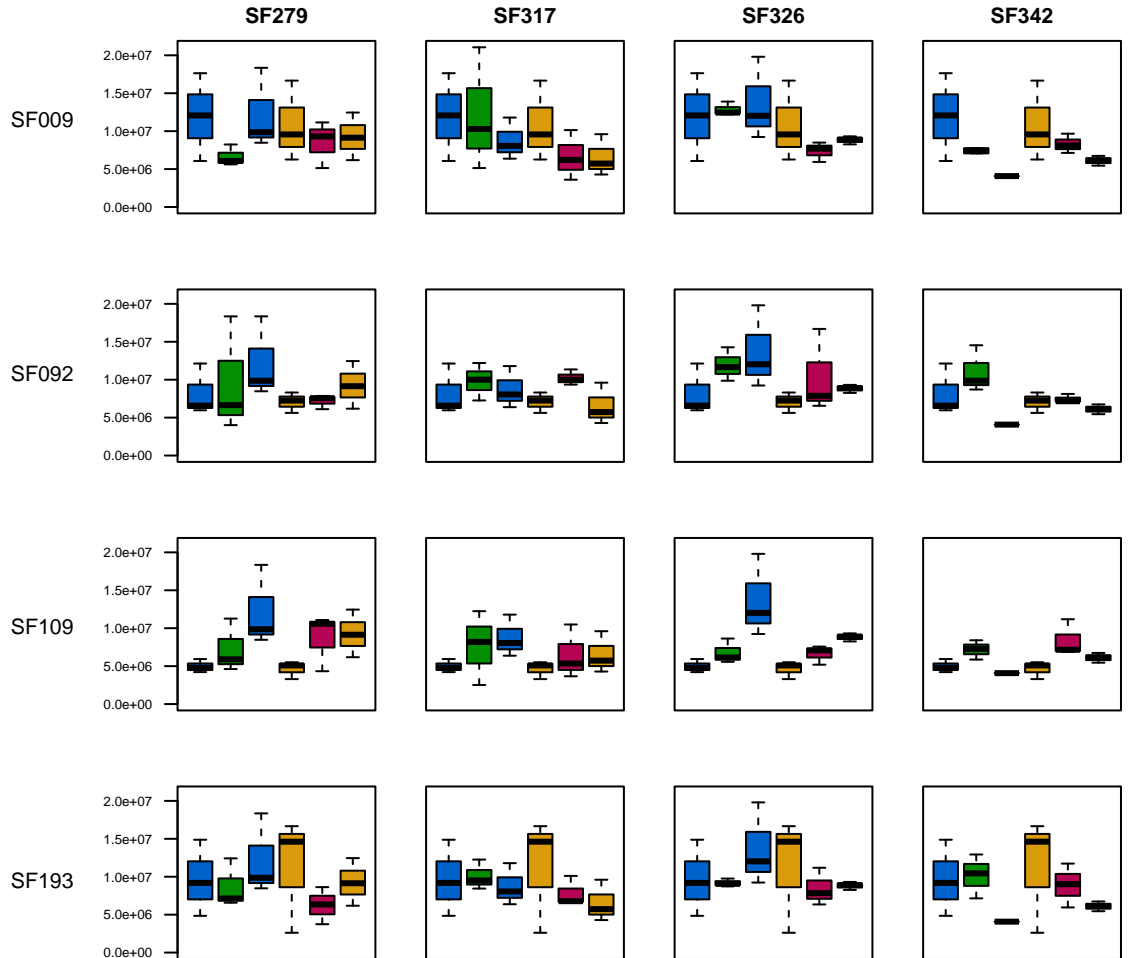

HanXRQChr15g0474991  
Putative glucose/ribitol dehydrogenase

- Parents WW
- Parents WD
- Hybrids WW
- Hybrids WD

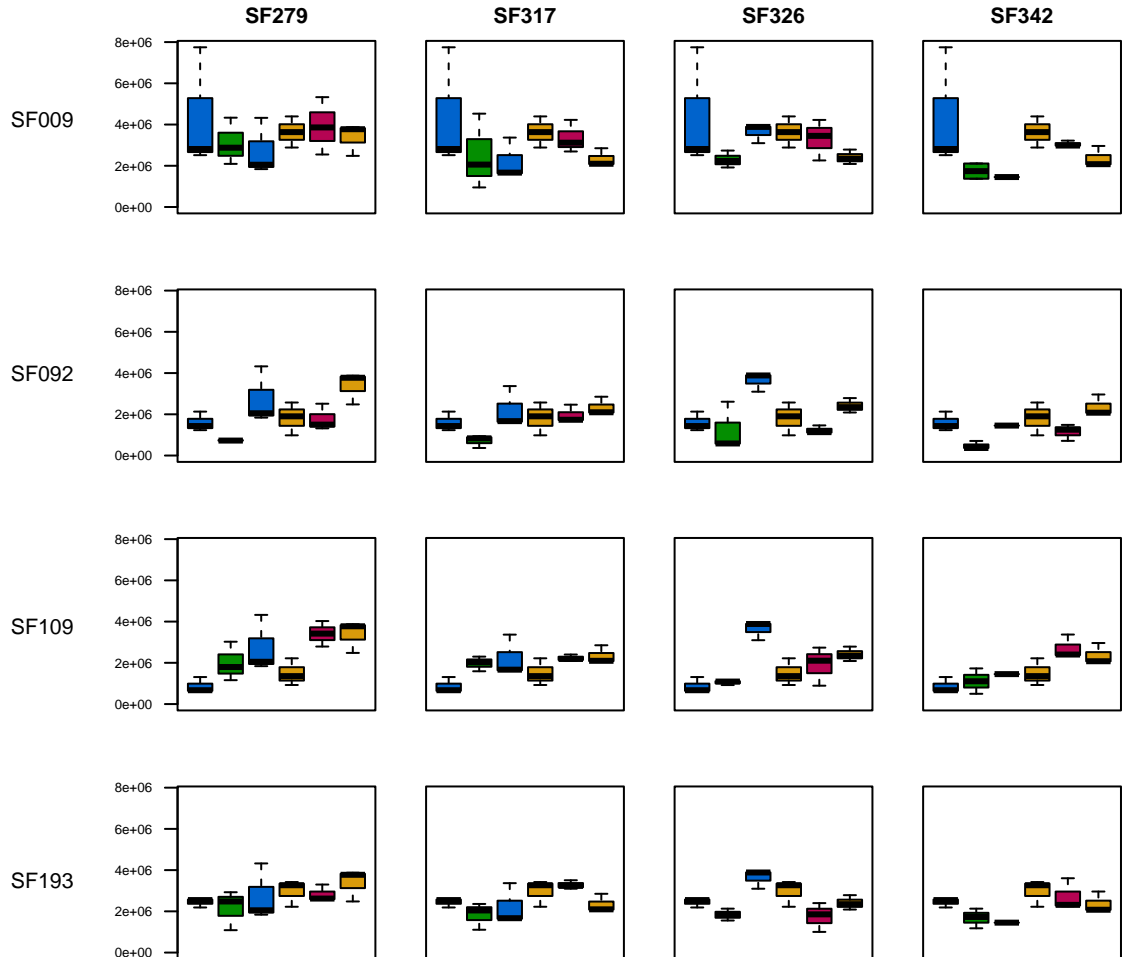

HanXRQChr08g0232301  
Probable 70 kDa peptidyl-prolyl  
isomerase

Parents WW  
Parents WD  
Hybrids WW  
Hybrids WD

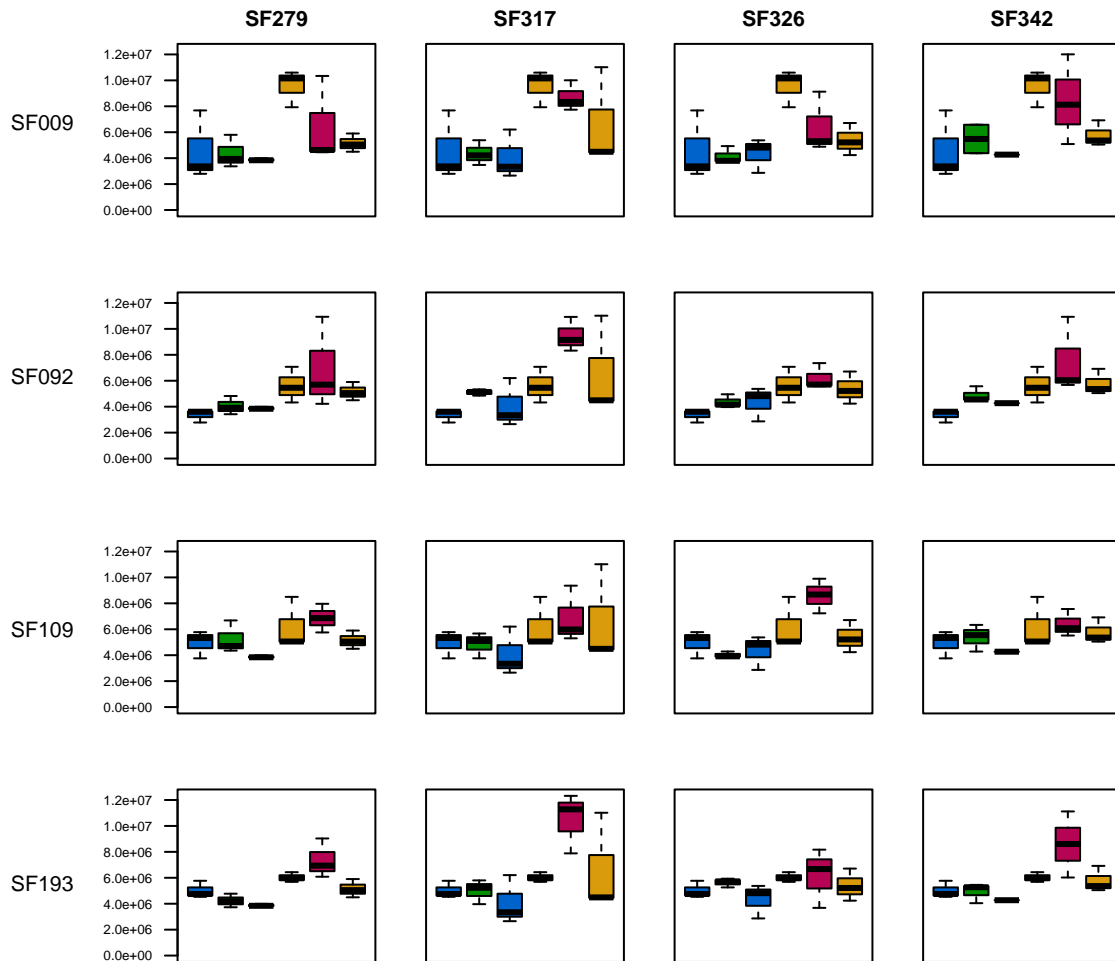

HanXRQChr05g0142871  
Putative ribosomal protein L18e/L15P;  
Ribosomal protein L15

Parents WW  
Parents WD  
Hybrids WW  
Hybrids WD

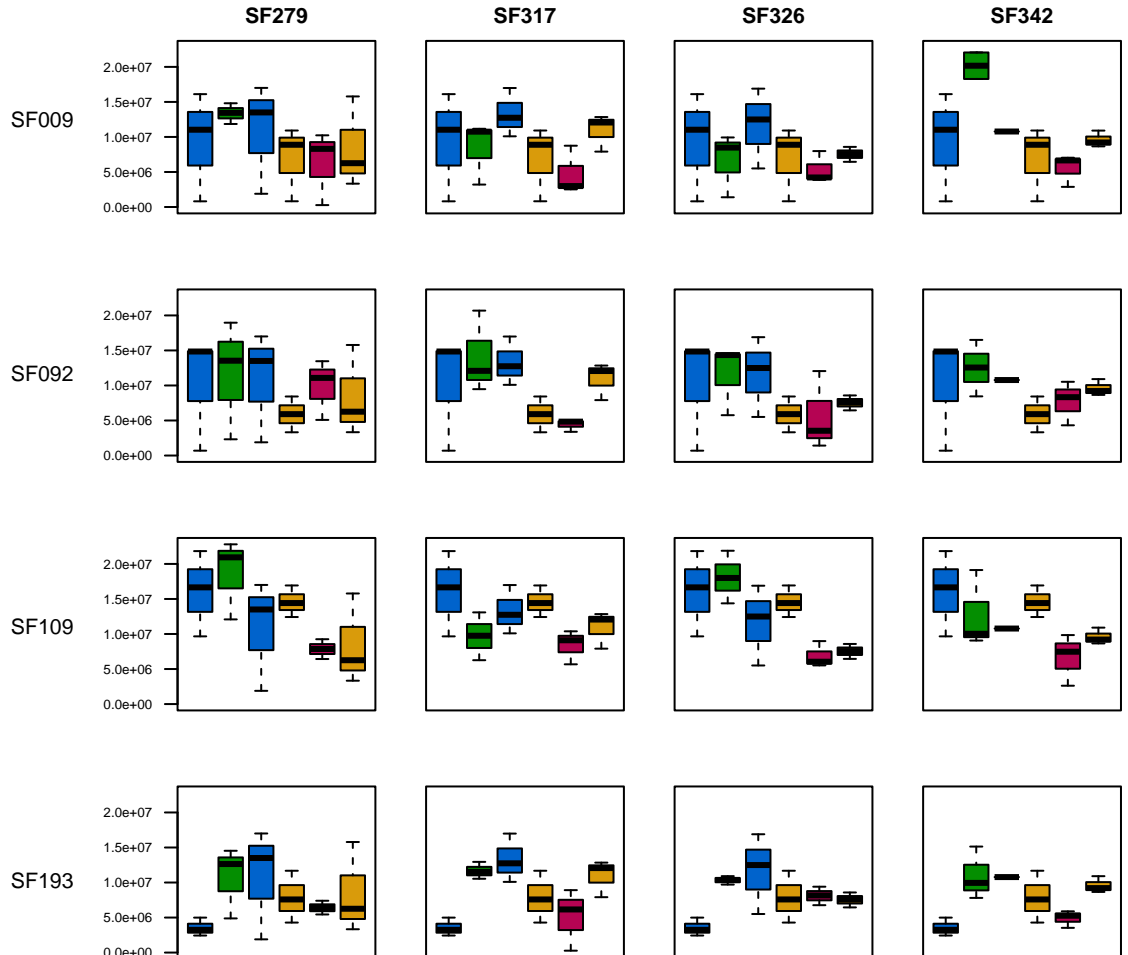

HanXRQChr06g0176171  
 Probable plastid-lipid associated  
 protein PAP / fibrillin family protein

Parents WW  
 Parents WD  
 Hybrids WW  
 Hybrids WD

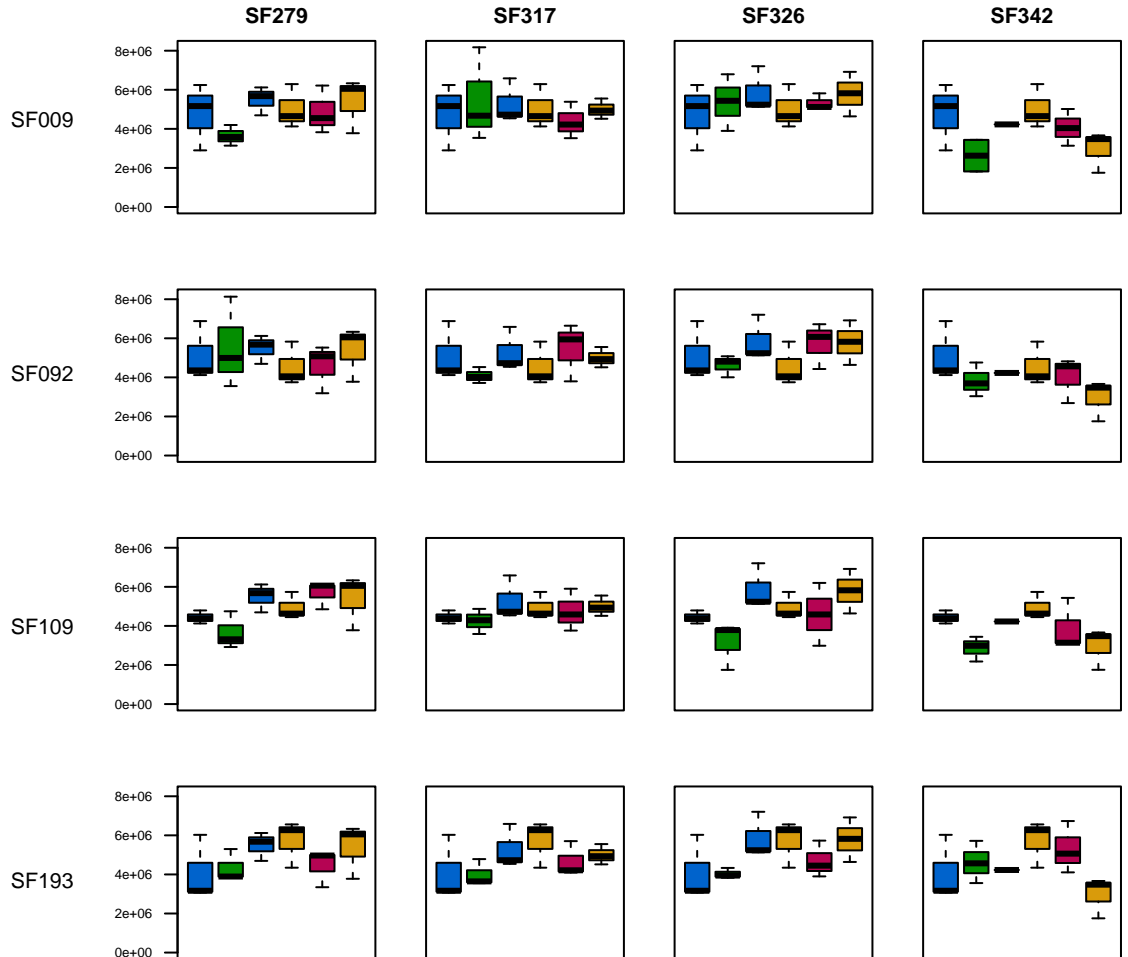



HanXRQChr16g0509121  
Probable SWIB/MDM2 domain superfamily  
protein

Parents WW  
Parents WD  
Hybrids WW  
Hybrids WD

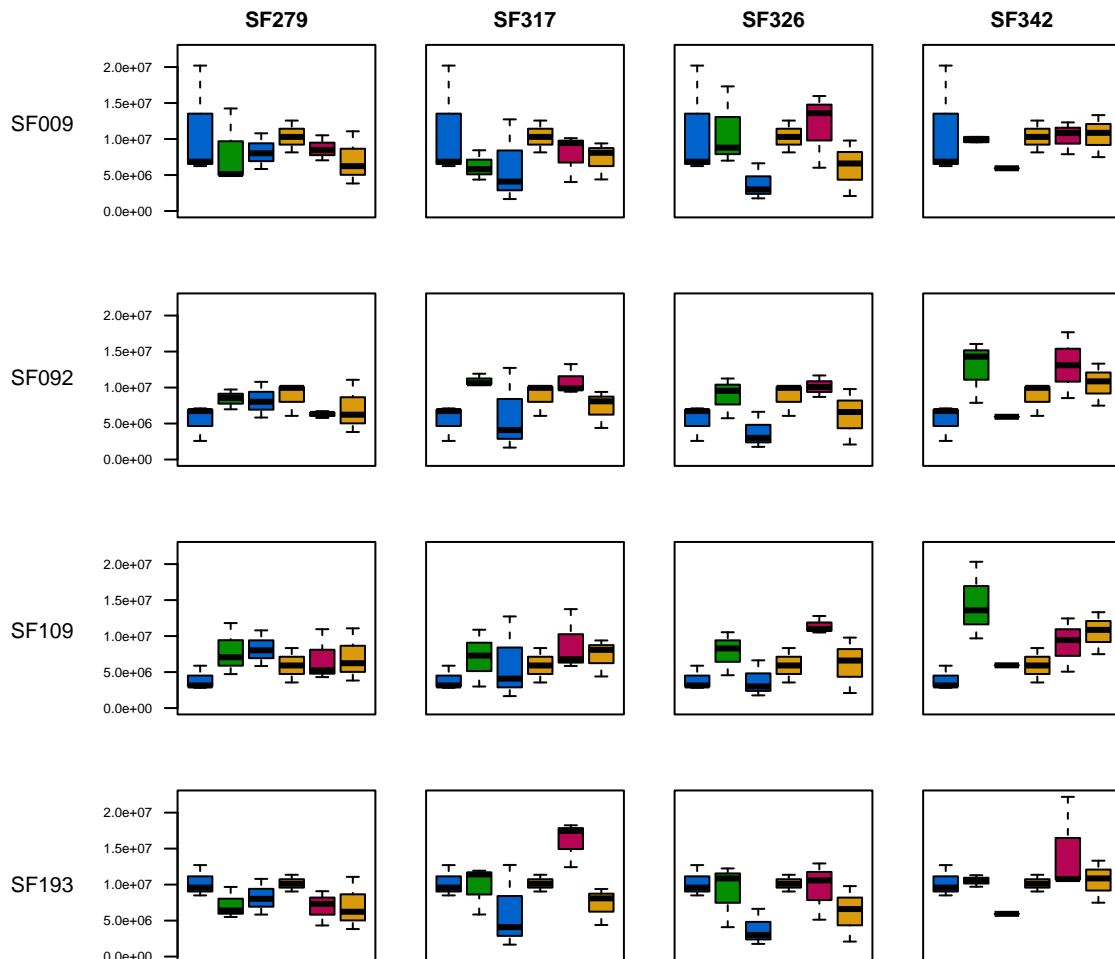

HanXRQChr09g0260341  
Putative proteinase inhibitor,  
propeptide; Peptidase S8, subtilisin-related

Parents WW  
Parents WD  
Hybrids WW  
Hybrids WD

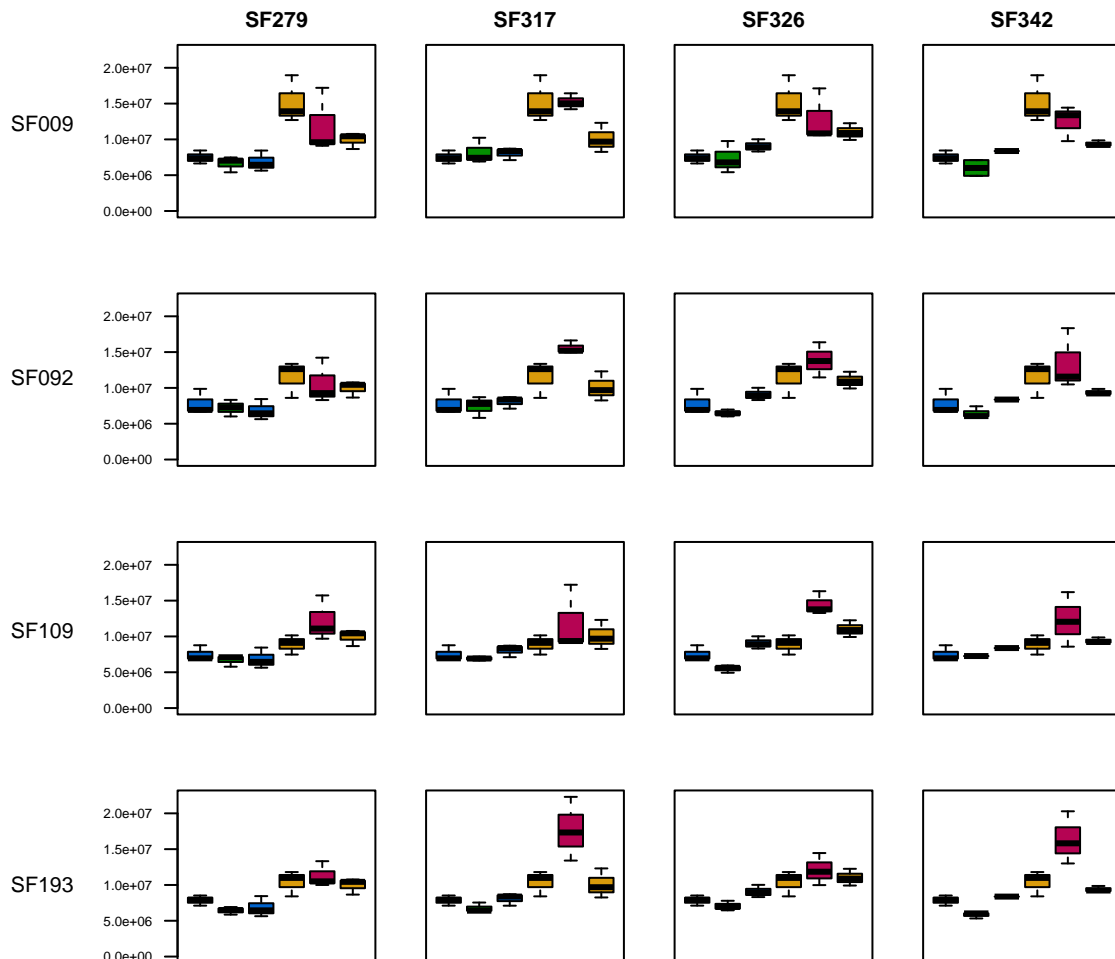

HanXRQChr11g0341301  
Uncharacterized protein, conserved in  
plant genome(s), supported by expression c

Parents WW  
Parents WD  
Hybrids WW  
Hybrids WD

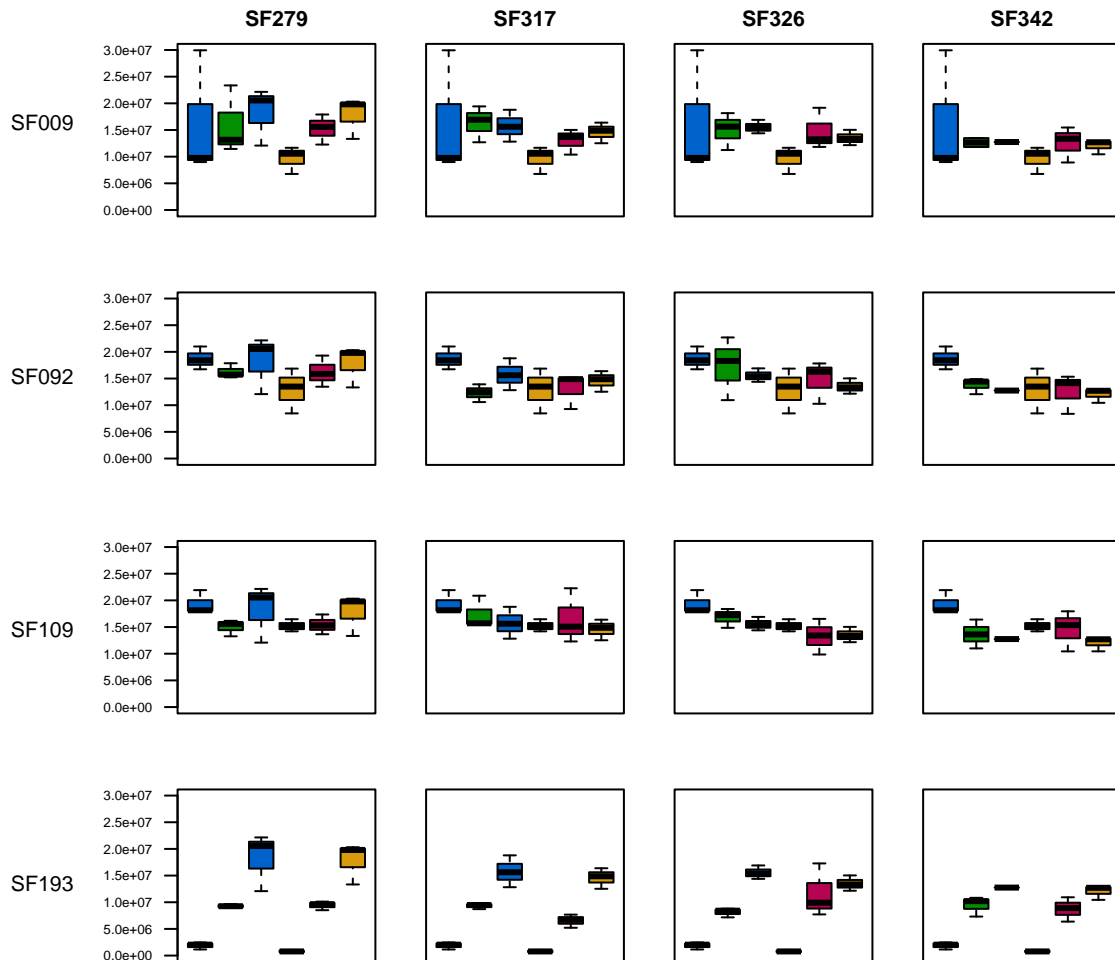

HanXRQChr16g0521111  
Probable glycine-tRNA ligases

- Parents WW
- Parents WD
- Hybrids WW
- Hybrids WD

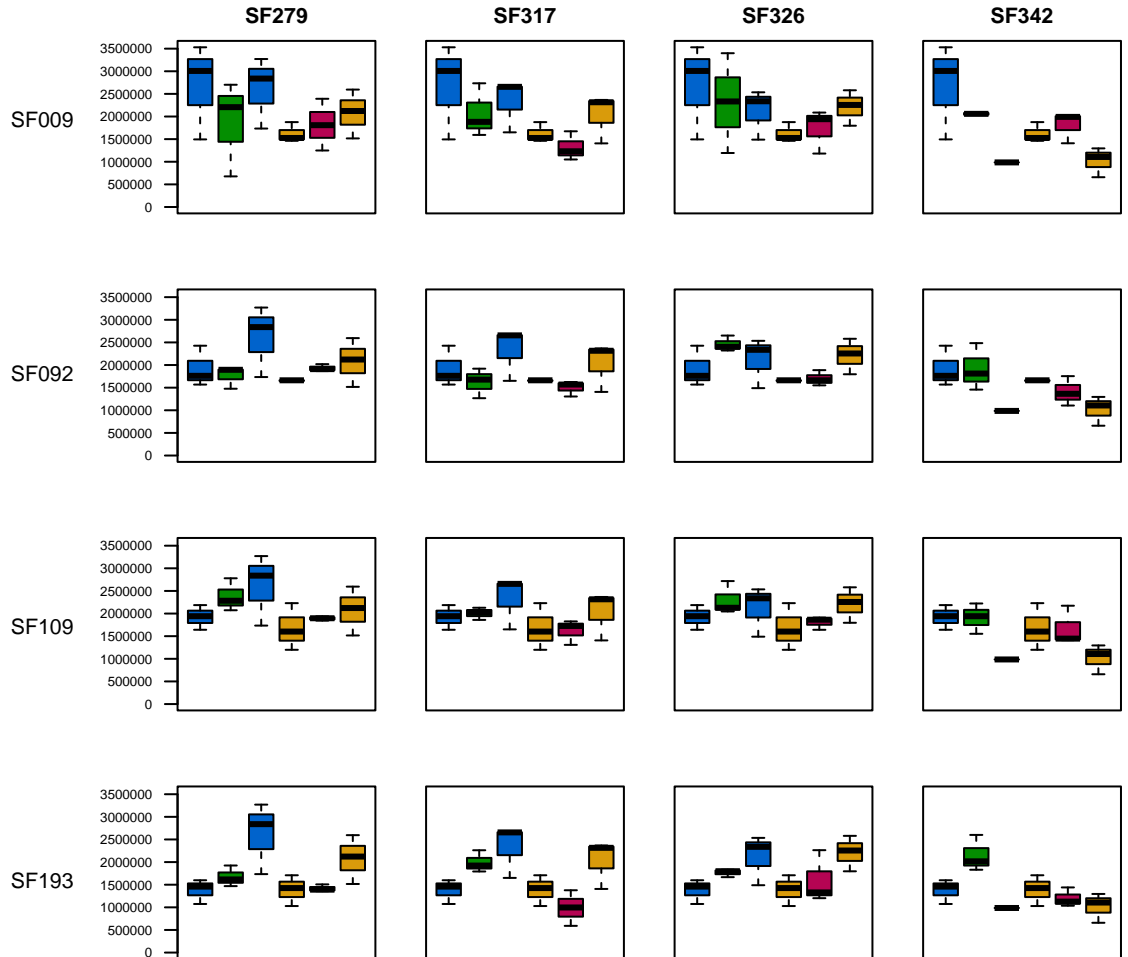

HanXRQChr05g0143821  
Probable NAD(P)-linked oxidoreductase  
superfamily protein

Parents WW  
Parents WD  
Hybrids WW  
Hybrids WD

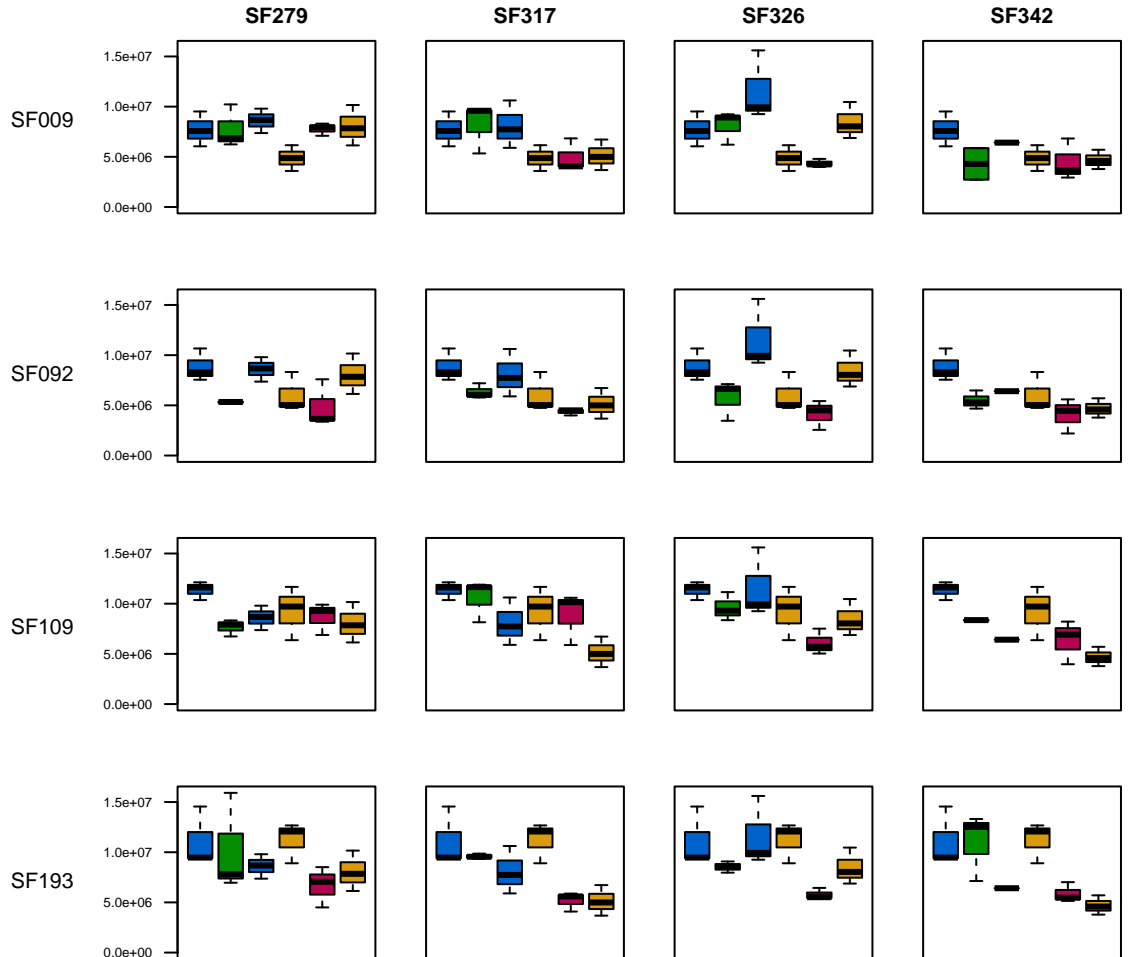

HanXRQChr08g0216431

Putative catalase haem-binding site;

Catalase immune-responsive domain; Cat

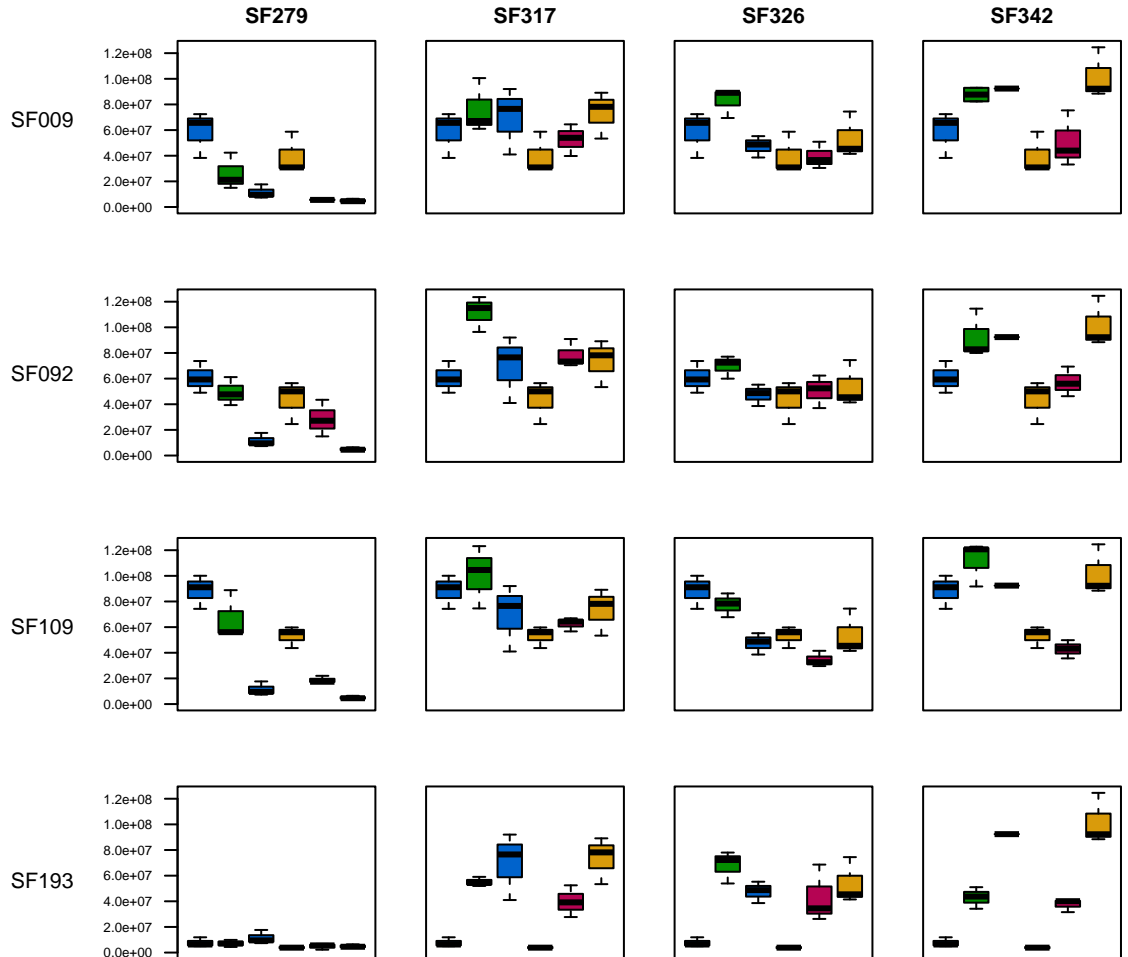

HanXRQChr13g0423401  
Probable FKBP-like peptidyl-prolyl  
cis-trans isomerase family protein

Parents WW  
Parents WD  
Hybrids WW  
Hybrids WD

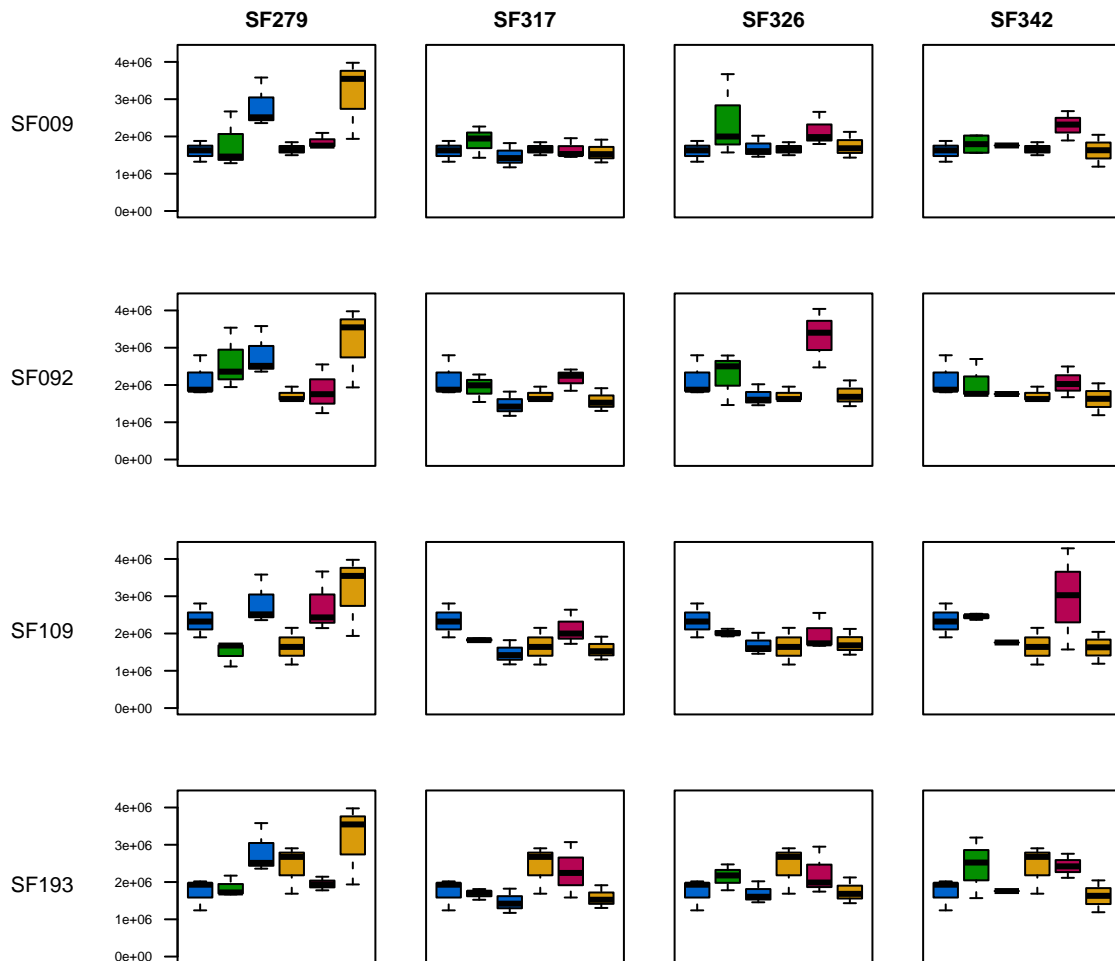

HanXRQChr04g0113911  
Putative methyltransferase type 11;  
S-adenosyl-L-methionine-dependent met

Parents WW  
Parents WD  
Hybrids WW  
Hybrids WD

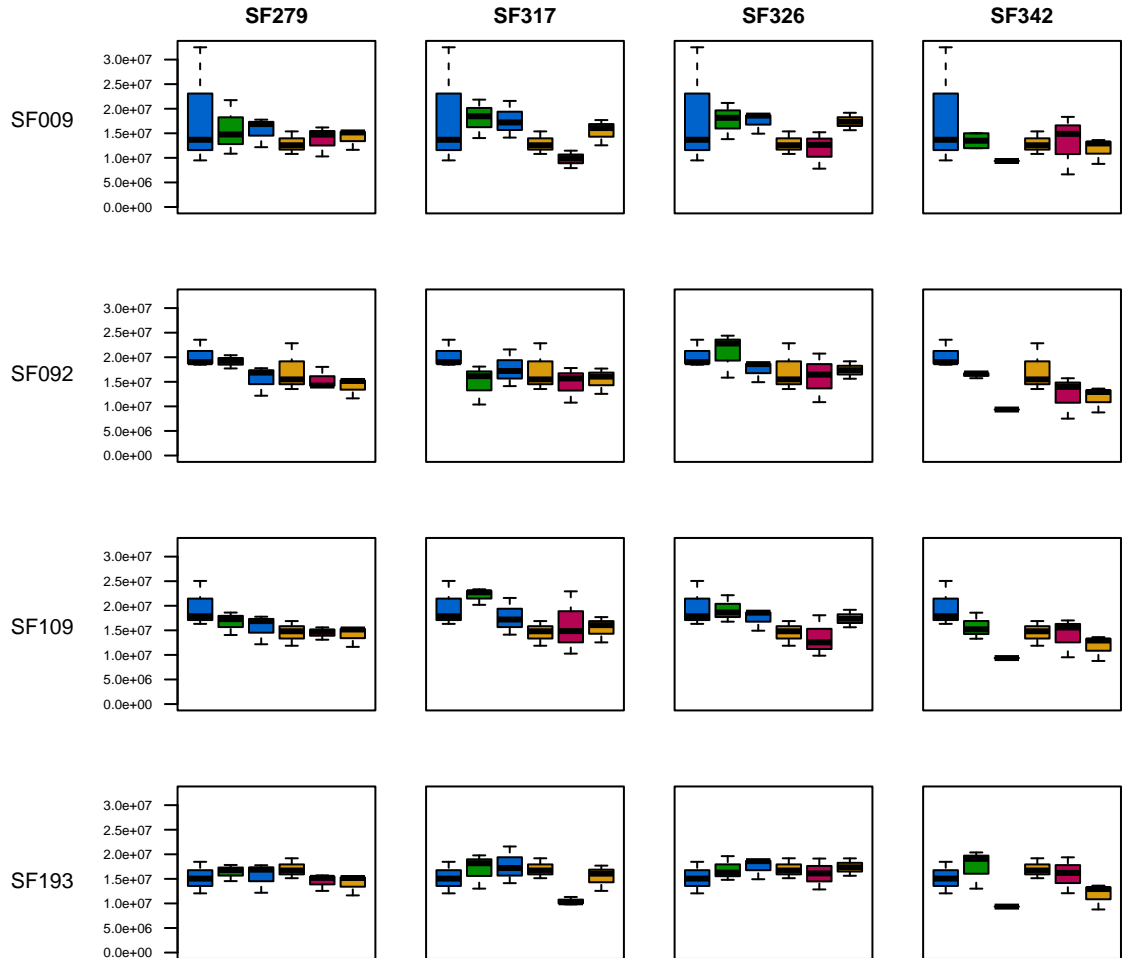



HanXRQChr08g0232321  
Probable FK506- and rapamycin-binding  
protein 15 kD-2

Parents WW  
Parents WD  
Hybrids WW  
Hybrids WD

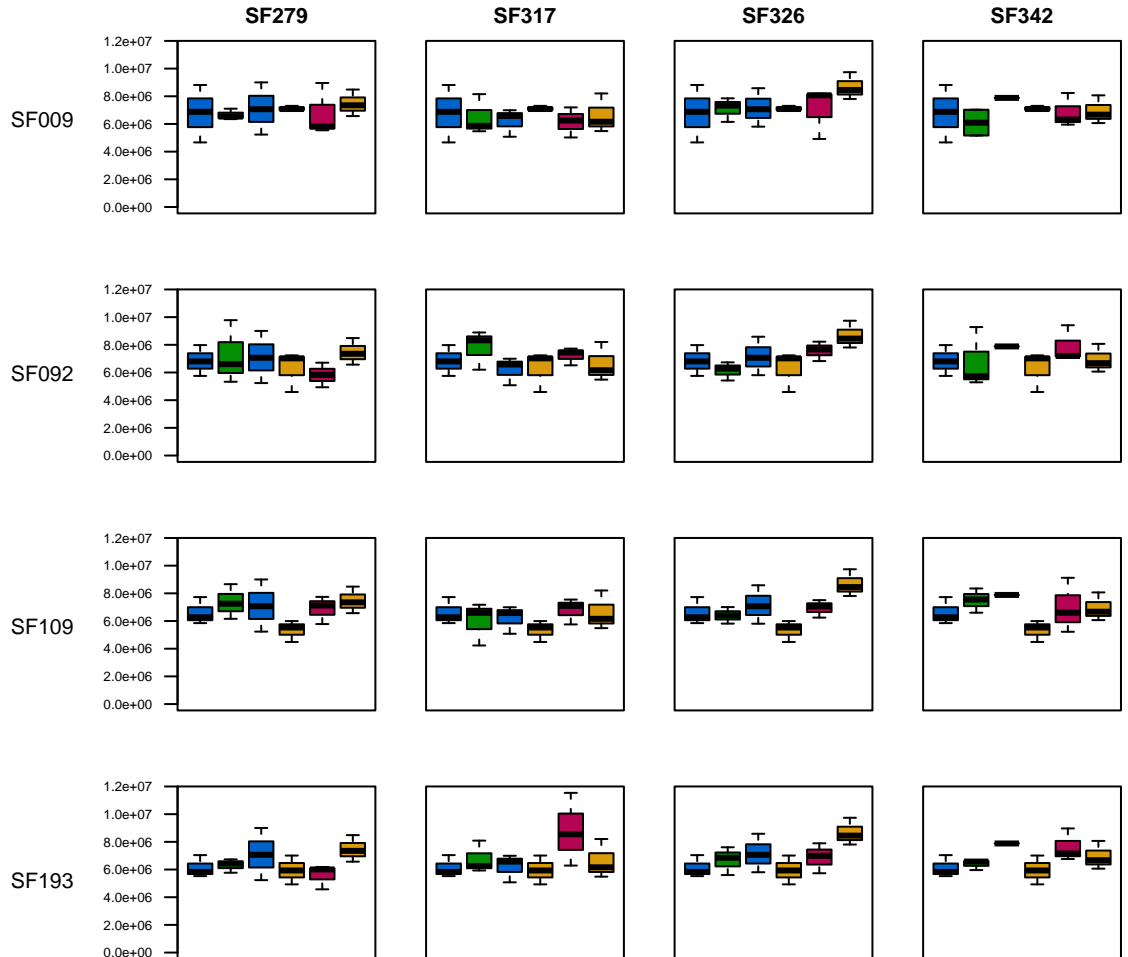

HanXRQChr06g0181111  
Probable aminopeptidase M1

Parents WW  
Parents WD  
Hybrids WW  
Hybrids WD

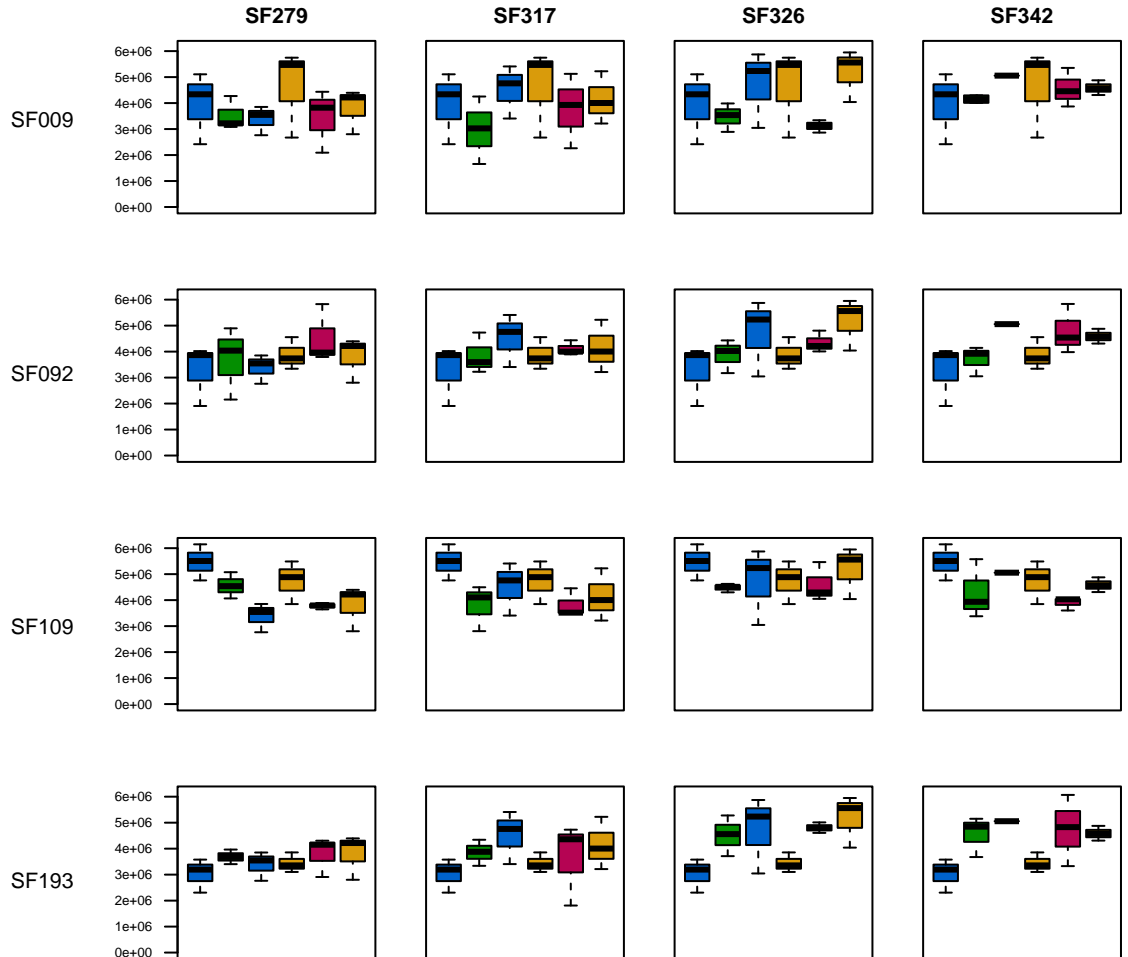

HanXRQChr10g0300081  
Probable elongation factor family  
protein

Parents WW  
Parents WD  
Hybrids WW  
Hybrids WD

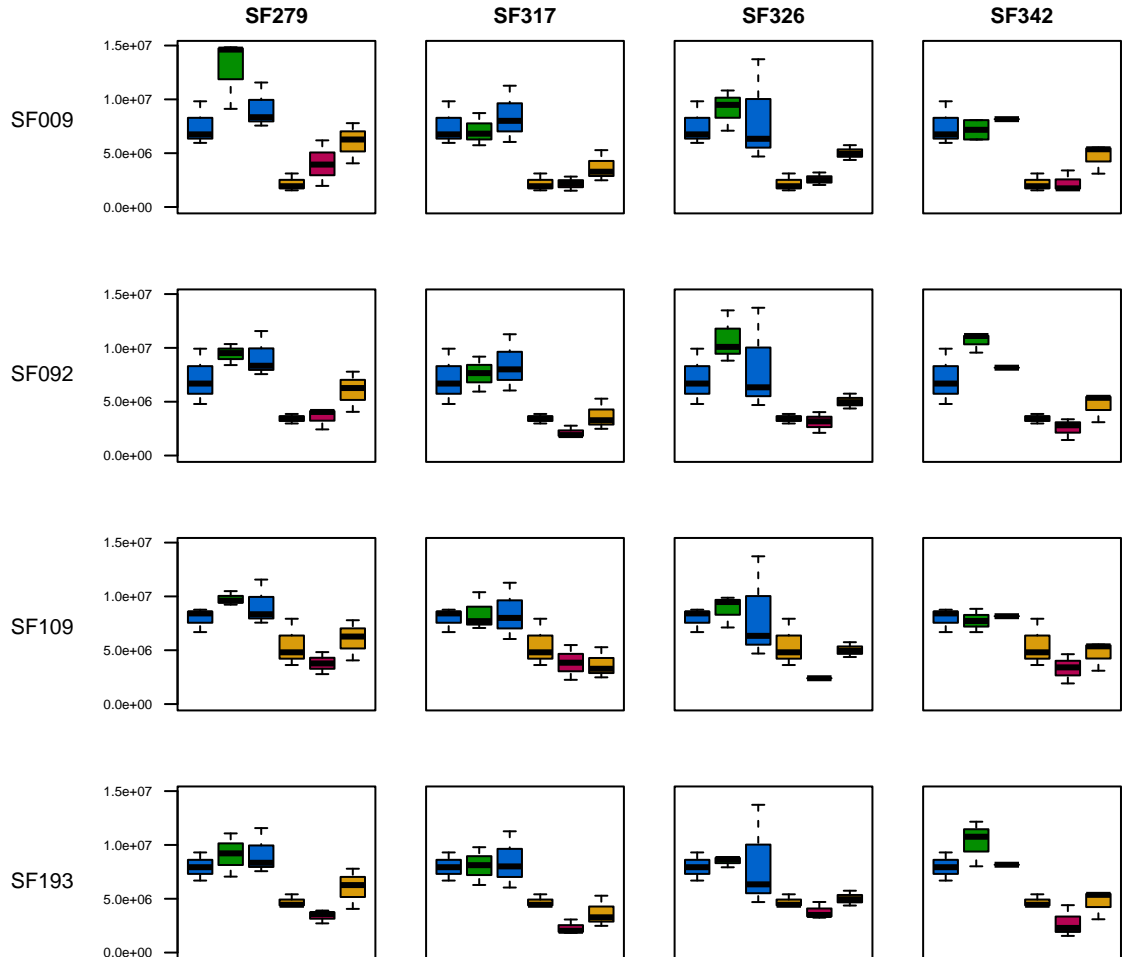

HanXRQChr01g0001731  
Putative S-crystallin; Transcriptional  
regulator Ure2

Parents WW  
Parents WD  
Hybrids WW  
Hybrids WD

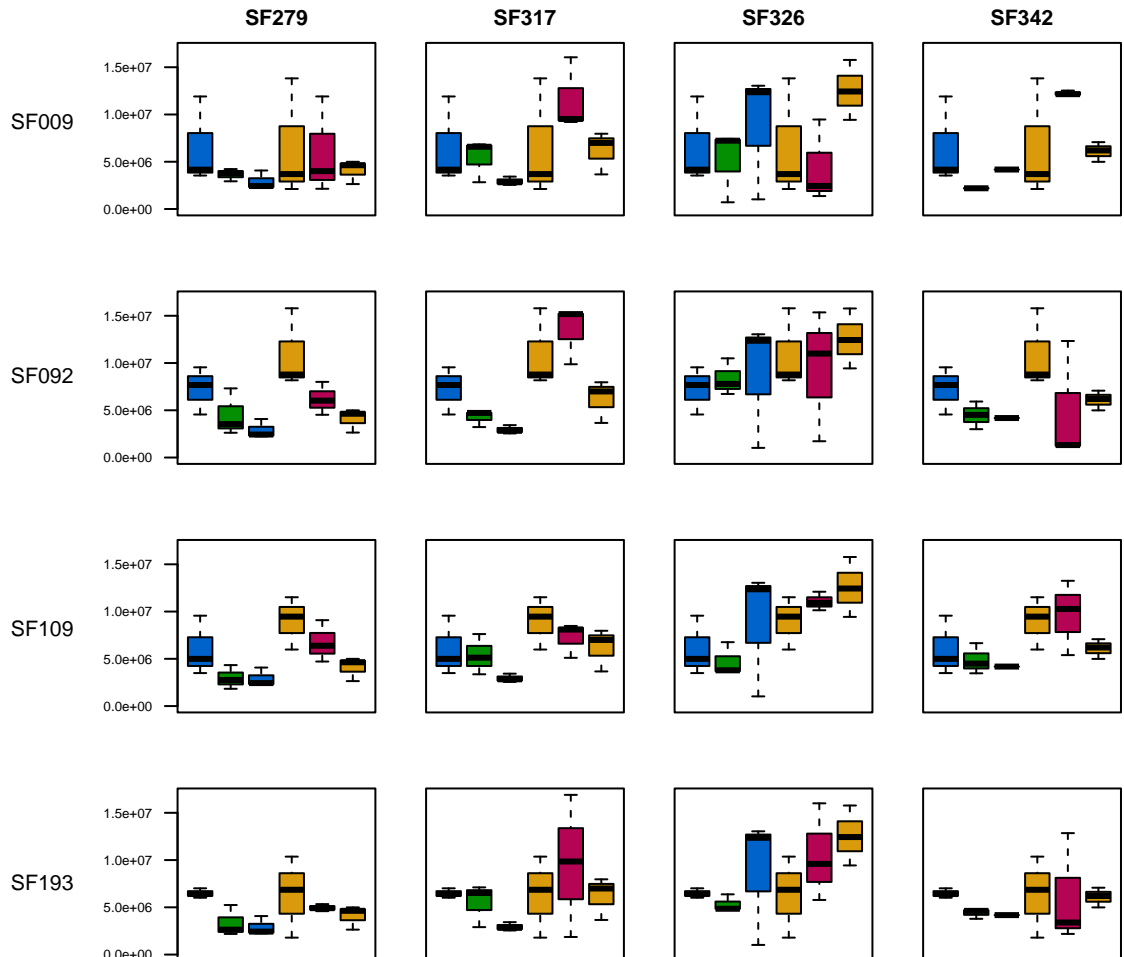

HanXRQChr05g0159241  
Probable psbQ-like 1

Parents WW  
Parents WD  
Hybrids WW  
Hybrids WD

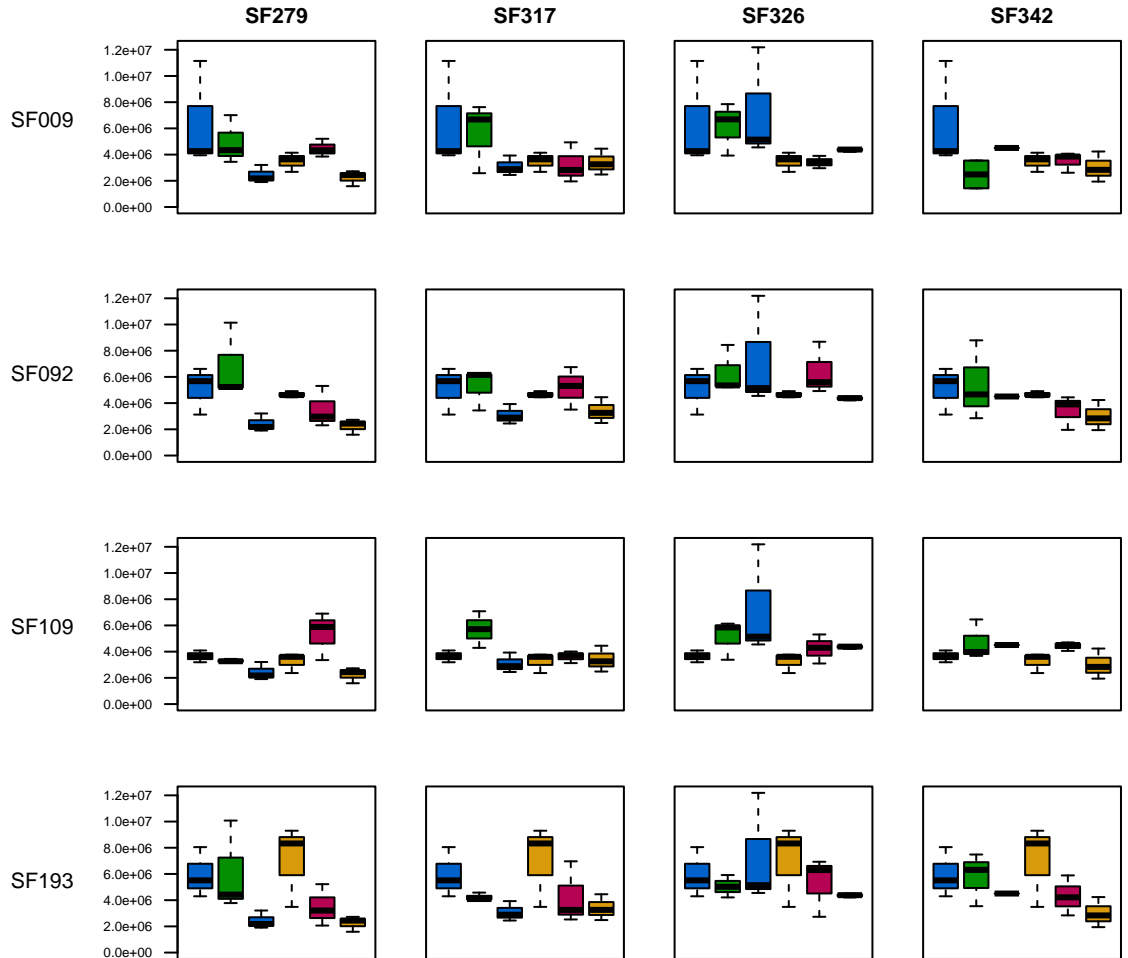

HanXRQChr11g0334971  
 Probable ribosomal protein  
 S5/Elongation factor G/III/V family protein

Parents WW  
 Parents WD  
 Hybrids WW  
 Hybrids WD

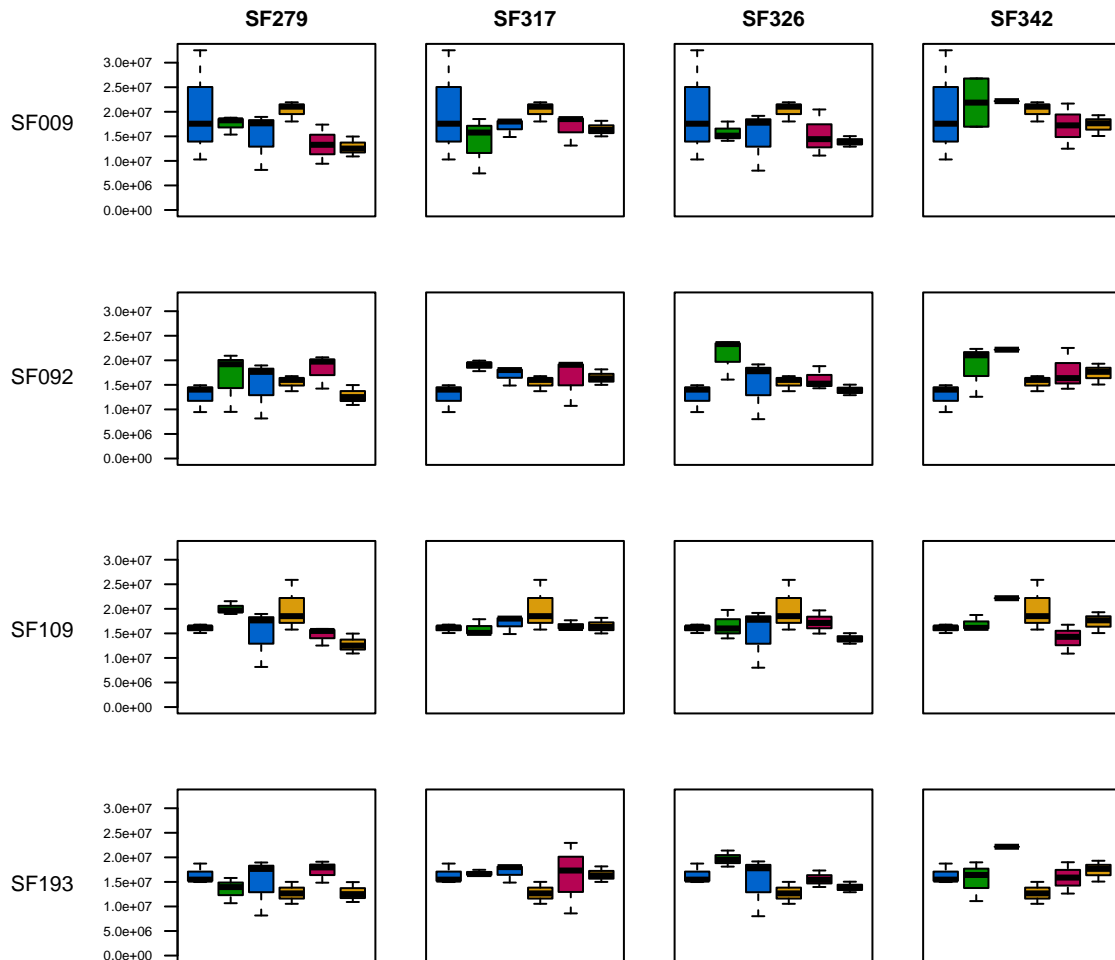

HanXRQChr09g0275271  
Probable MAR-binding filament-like  
protein 1-1

Parents WW  
Parents WD  
Hybrids WW  
Hybrids WD

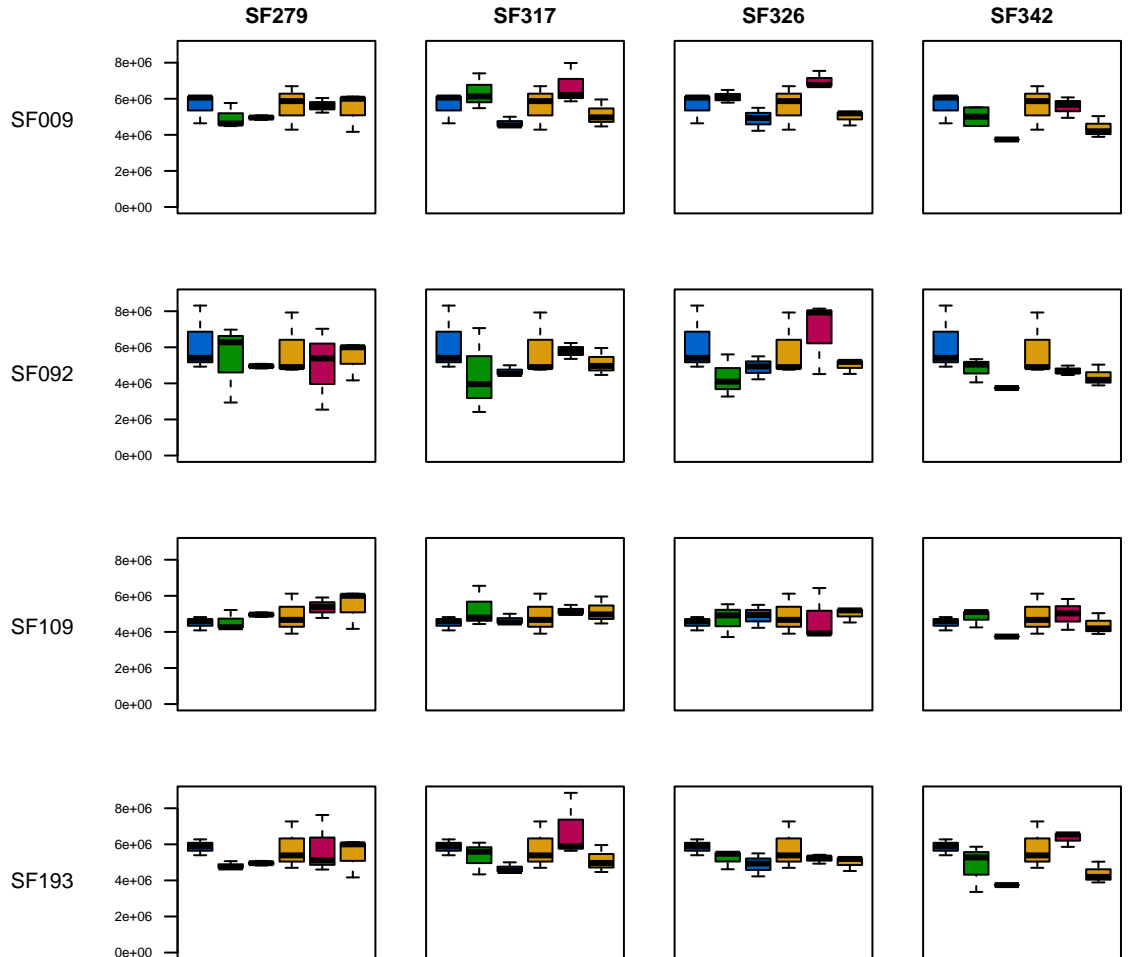

HanXRQChr16g0517311  
Putative 1-deoxy-D-xylulose 5-phosphate  
reductoisomerase; NAD(P)-binding domain

Parents WW  
Parents WD  
Hybrids WW  
Hybrids WD

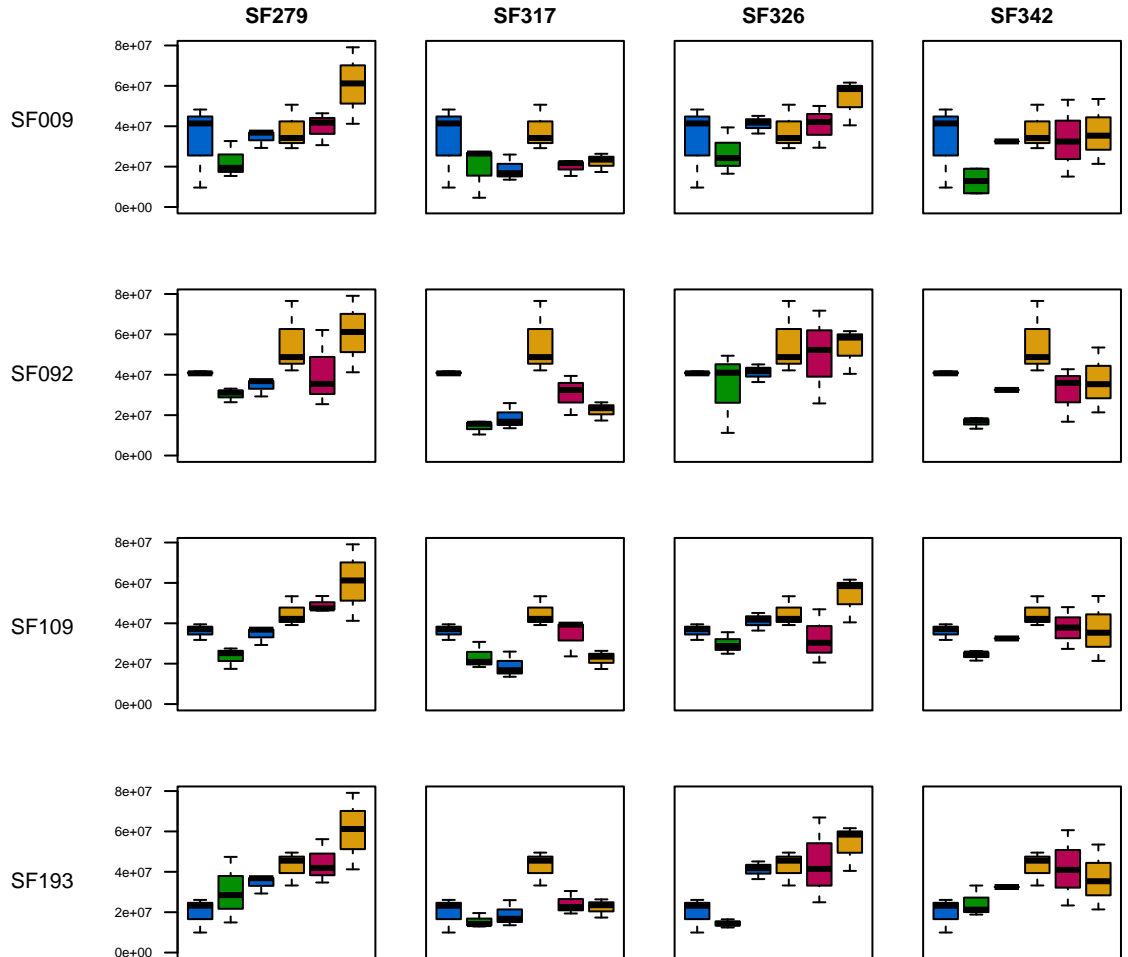



HanXRQChr01g0005271  
Putative K Homology domain

Parents WW  
Parents WD  
Hybrids WW  
Hybrids WD

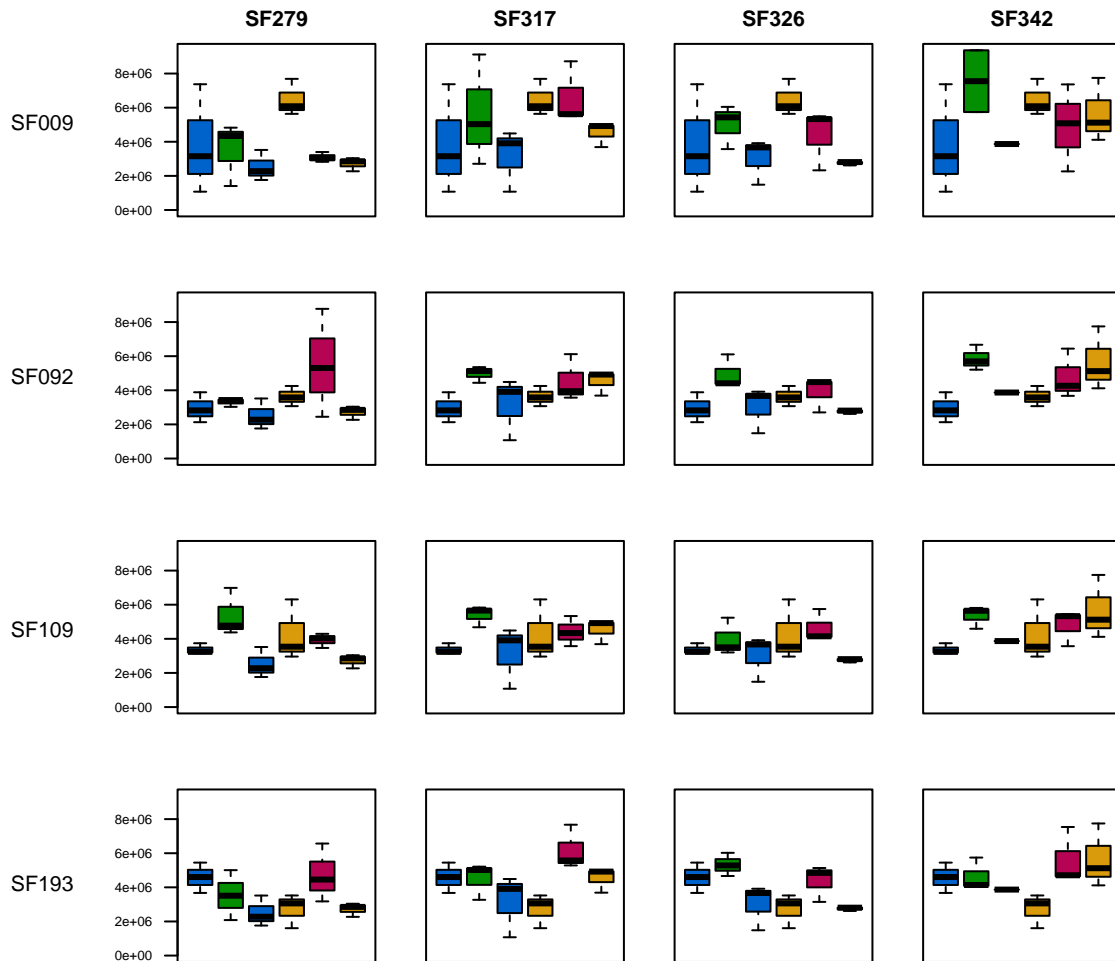

HanXRQChr14g0451681  
Putative ribosomal protein L12 family

- Parents WW
- Parents WD
- Hybrids WW
- Hybrids WD

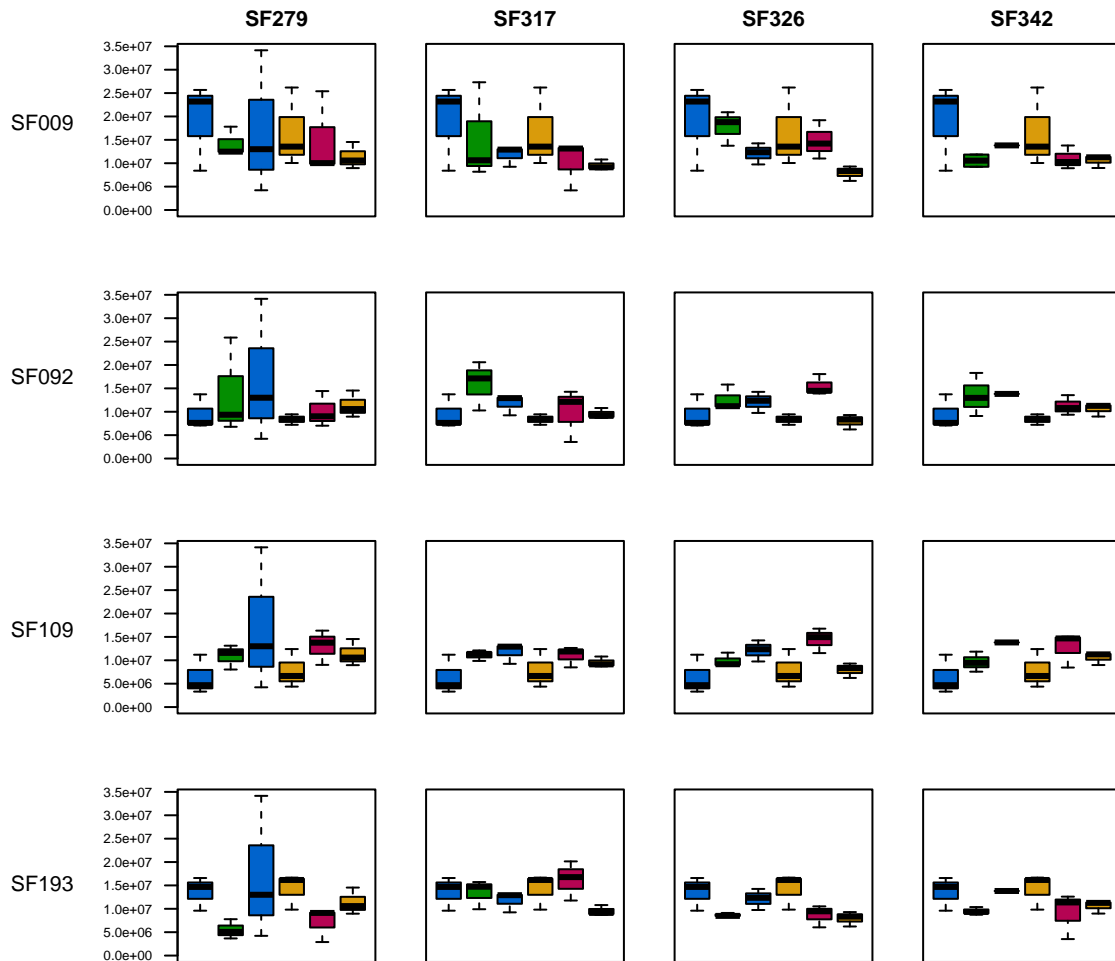

HanXRQChr01g0011491  
Probable PDI-like 1-4

Parents WW  
Parents WD  
Hybrids WW  
Hybrids WD

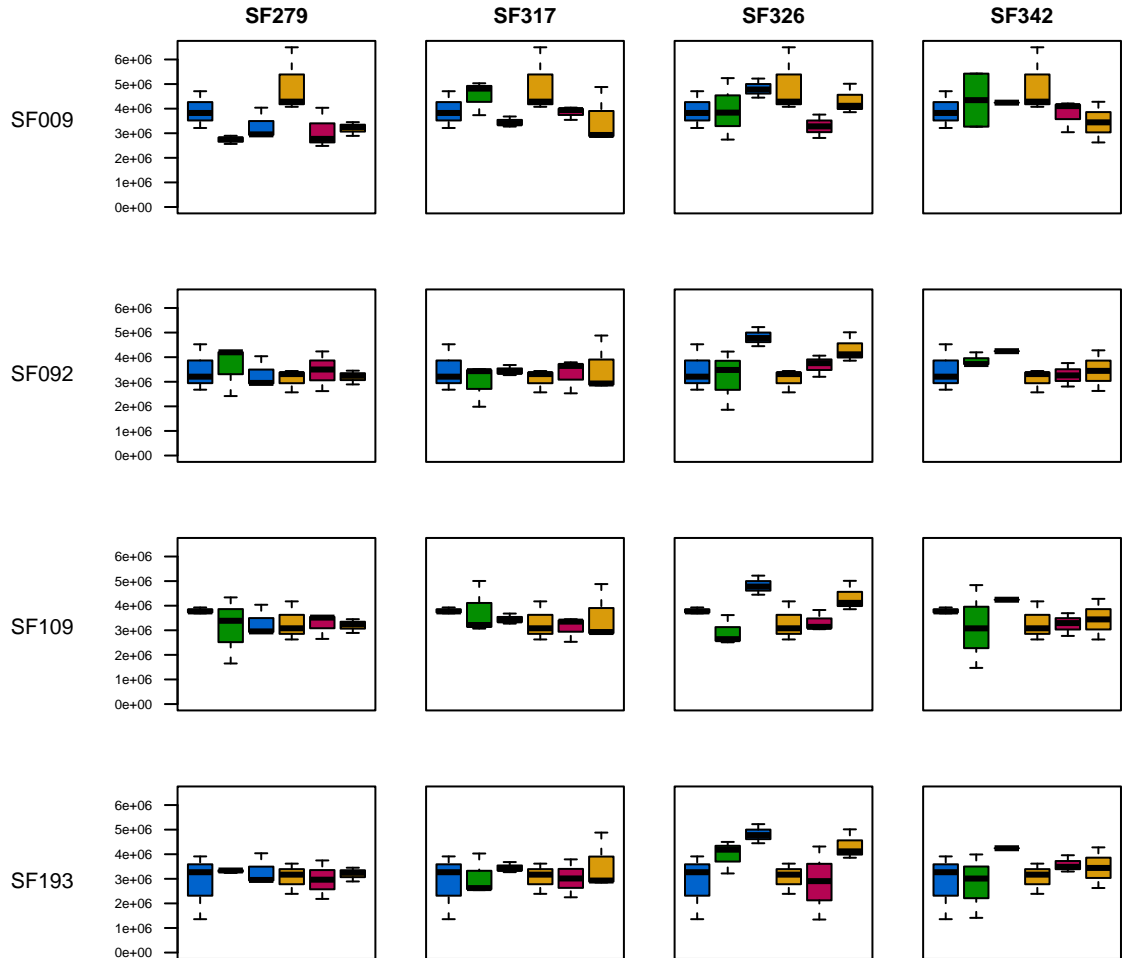

HanXRQChr08g0207371  
Putative glyceraldehyde/Erythrose  
phosphate dehydrogenase family

Parents WW  
Parents WD  
Hybrids WW  
Hybrids WD

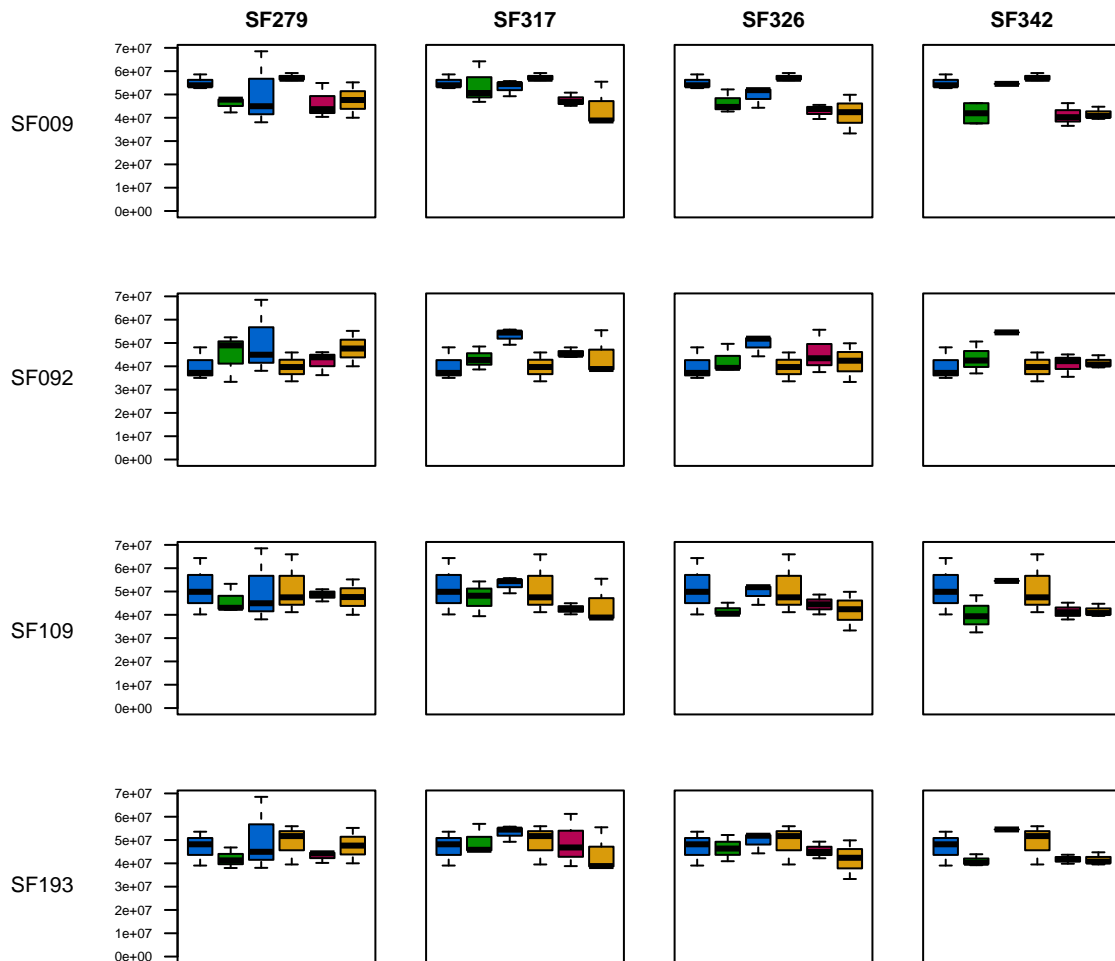

HanXRQChr06g0170291  
Probable ribosomal L5P family protein

Parents WW  
Parents WD  
Hybrids WW  
Hybrids WD

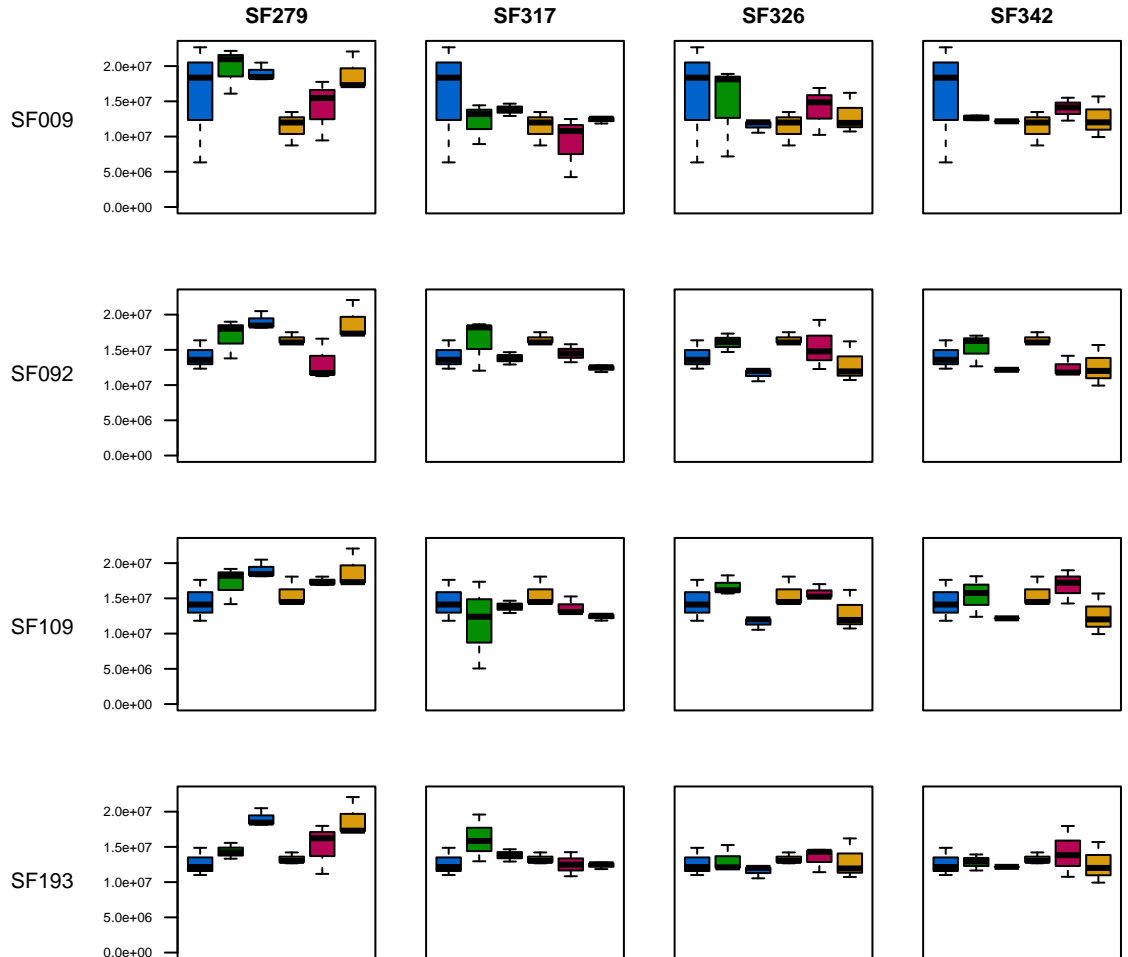

HanXRQChr12g0381711  
 Probable HSP20-like chaperones  
 superfamily protein

Parents WW  
 Parents WD  
 Hybrids WW  
 Hybrids WD

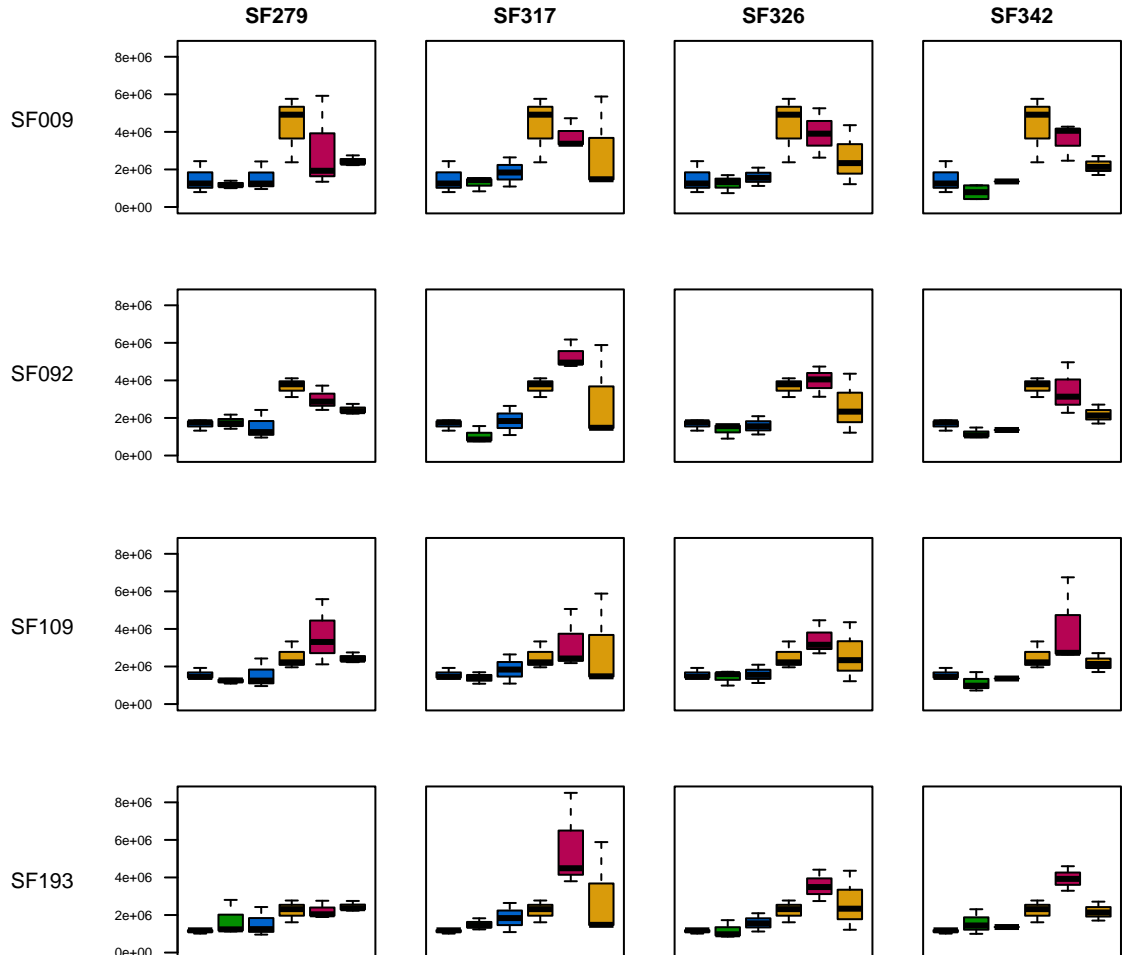

HanXRQChr03g0064531  
 Uncharacterized protein, conserved in  
 plant genome(s), supported by expression c

Parents WW  
 Parents WD  
 Hybrids WW  
 Hybrids WD

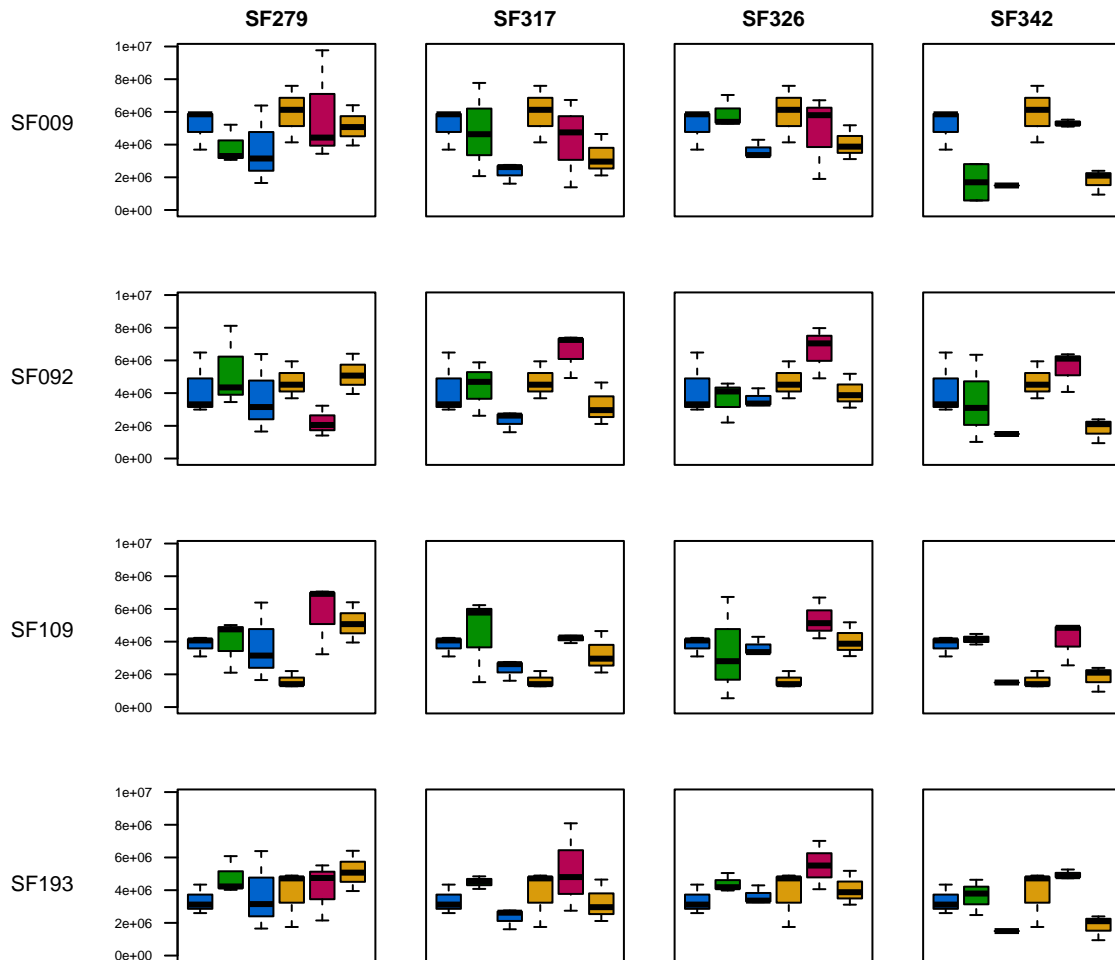

HanXRQChr03g0091361  
Putative SGNH hydrolase-type esterase  
domain

Parents WW  
Parents WD  
Hybrids WW  
Hybrids WD

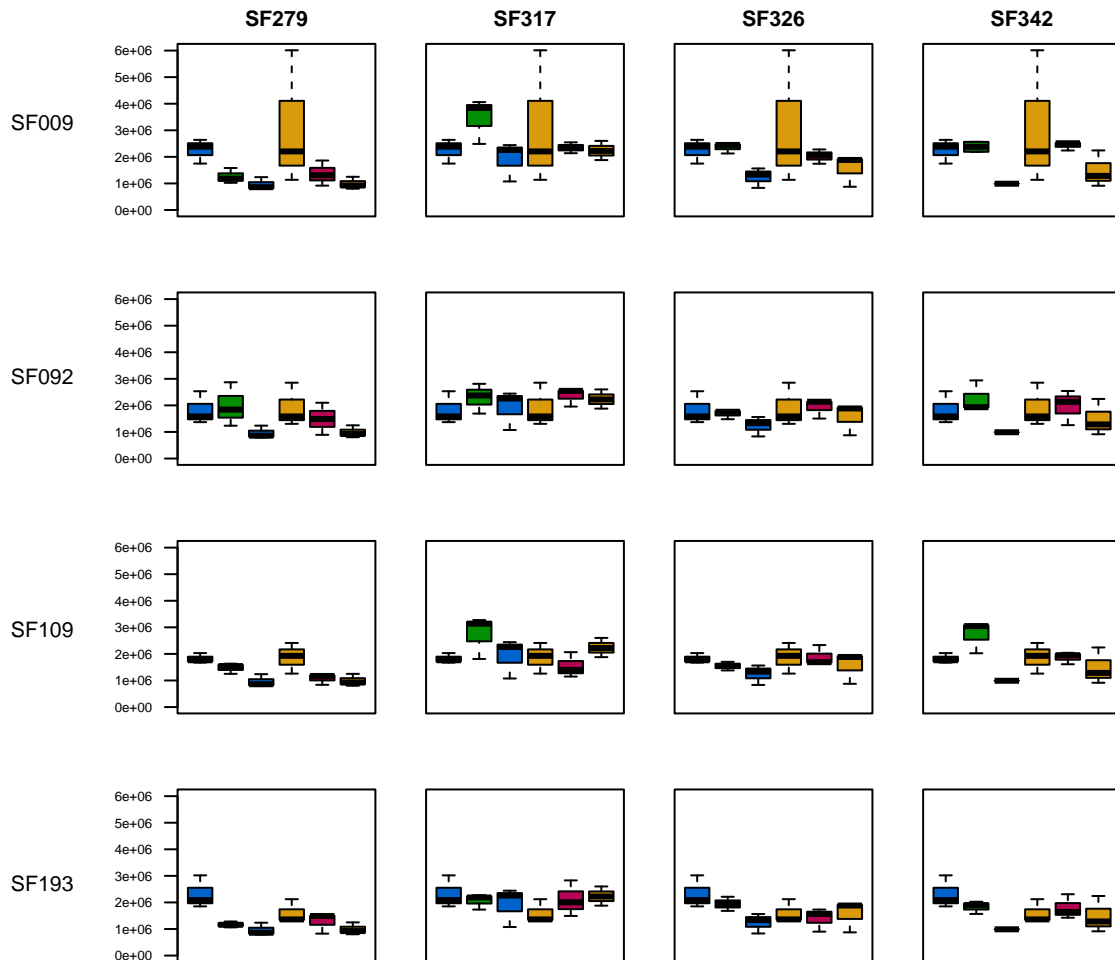



HanXRQChr02g0042811  
Putative phosphate-induced protein 1

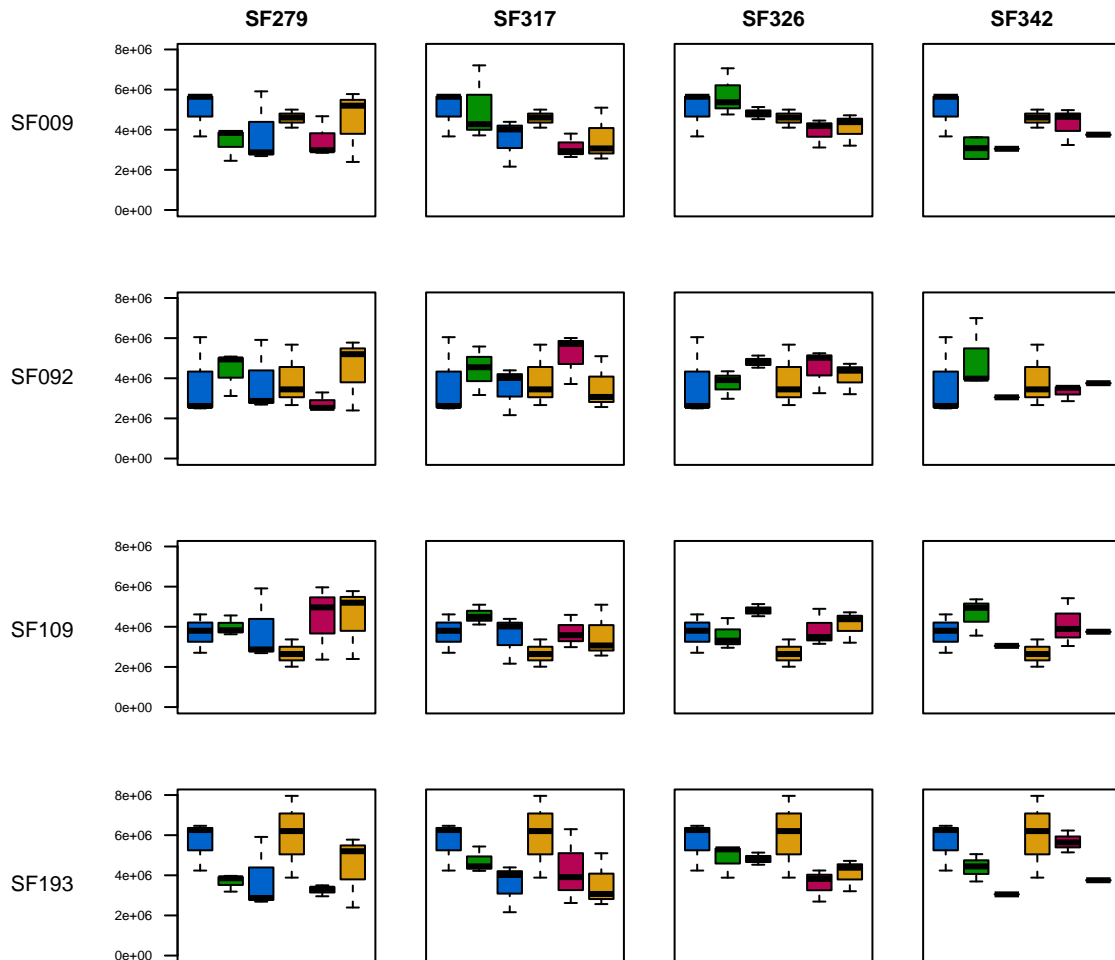

HanXRQChr10g0312561  
Probable subtilase family protein

Parents WW  
Parents WD  
Hybrids WW  
Hybrids WD

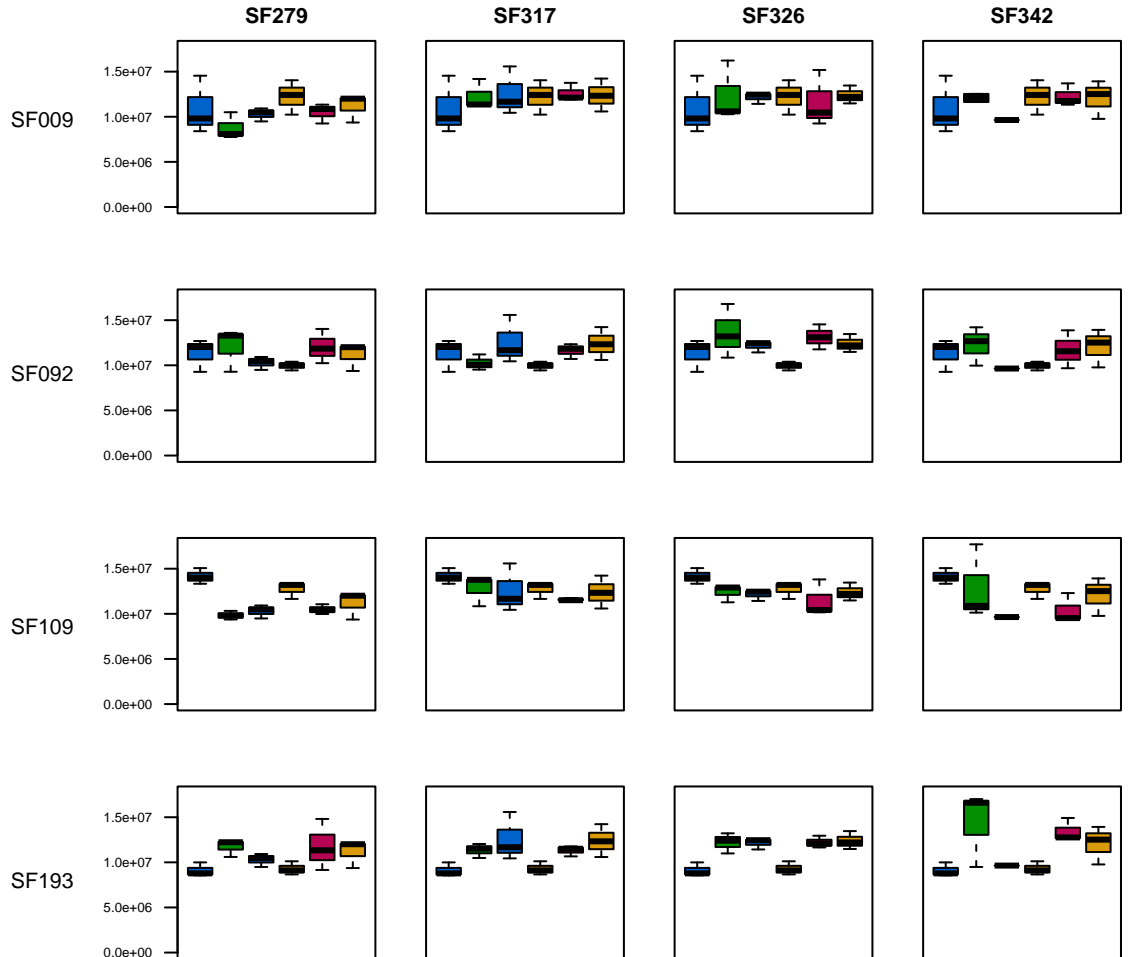

HanXRQChr16g0499501  
 Uncharacterized protein, conserved in  
 plant genome(s), supported by expression c

Parents WW  
 Parents WD  
 Hybrids WW  
 Hybrids WD

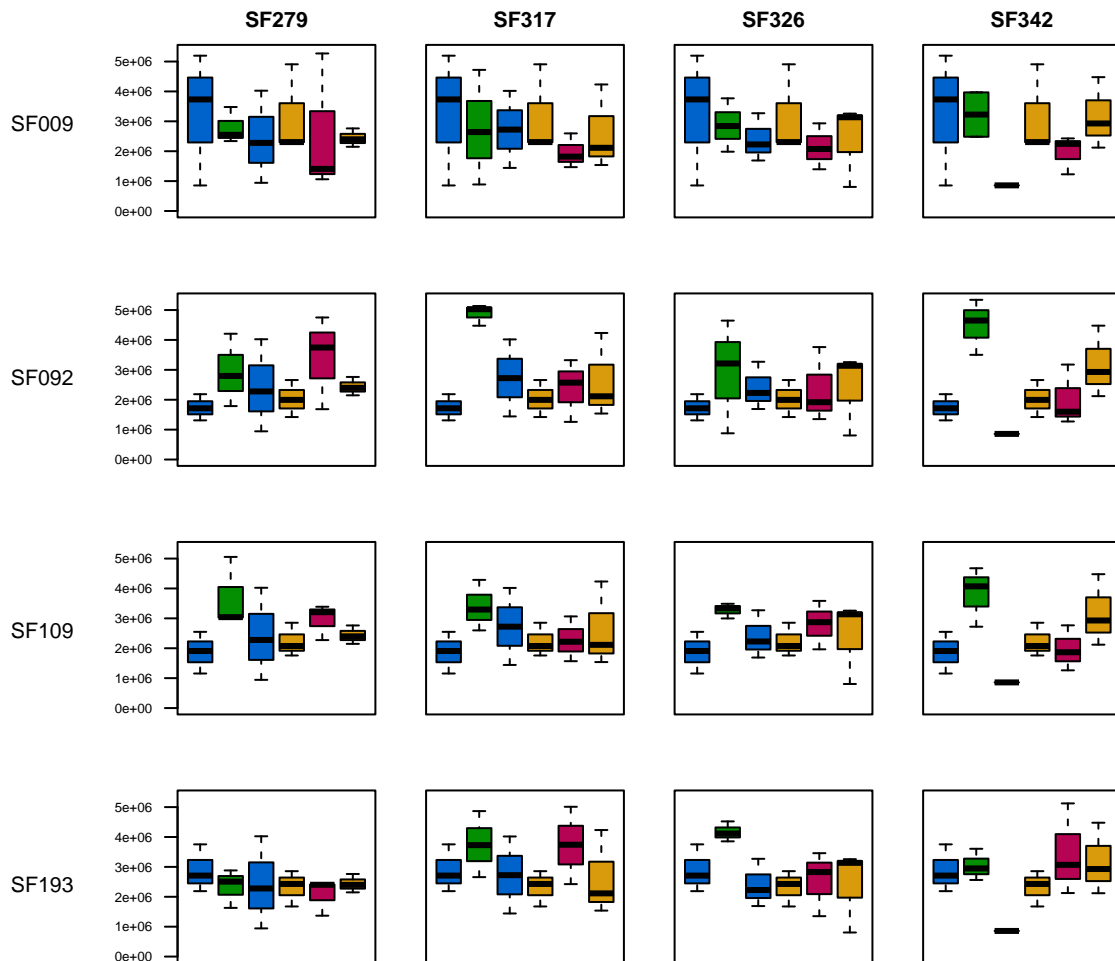

HanXRQChr06g0182811  
Probable RNA-binding (RRM/RBD/RNP  
motifs) family protein

Parents WW  
Parents WD  
Hybrids WW  
Hybrids WD

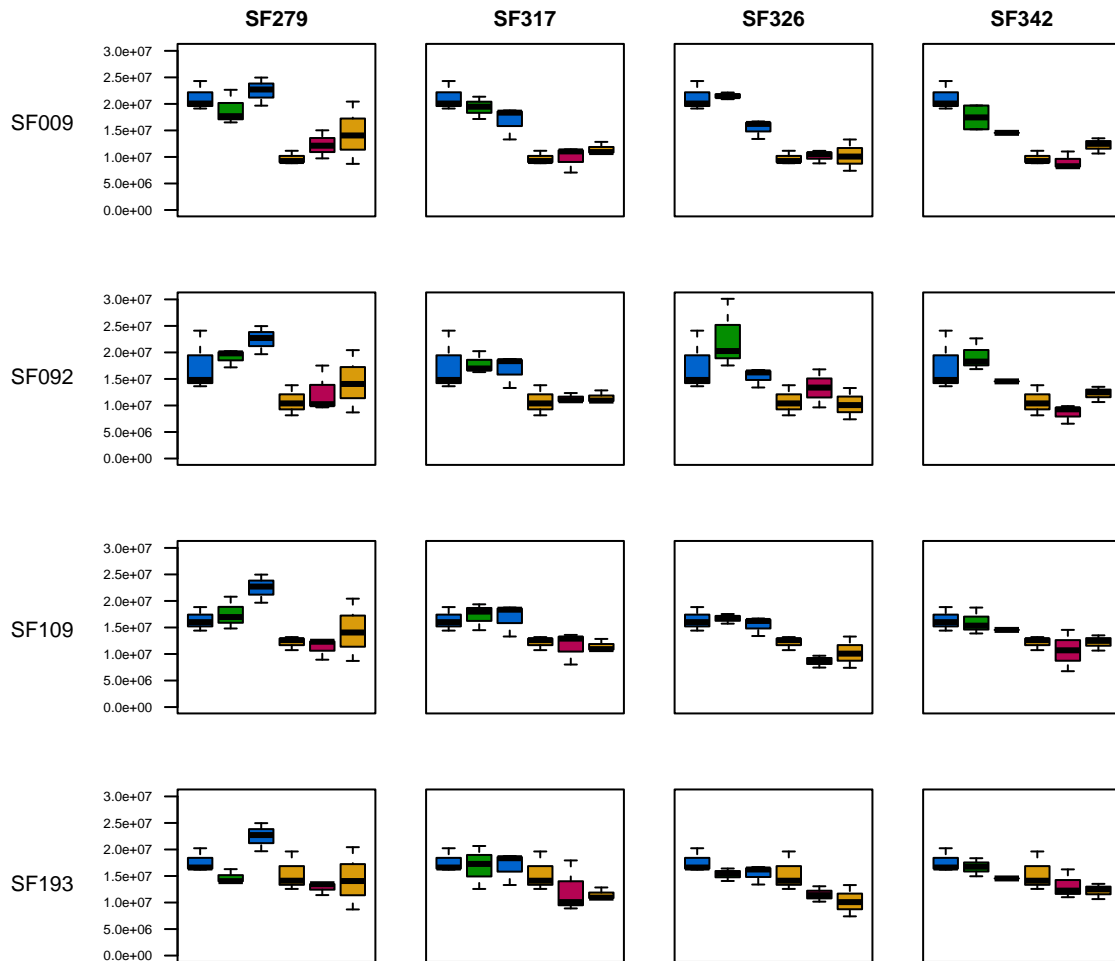

HanXRQChr04g0124381  
Probable late embryogenesis abundant  
protein (LEA) family protein

Parents WW  
Parents WD  
Hybrids WW  
Hybrids WD

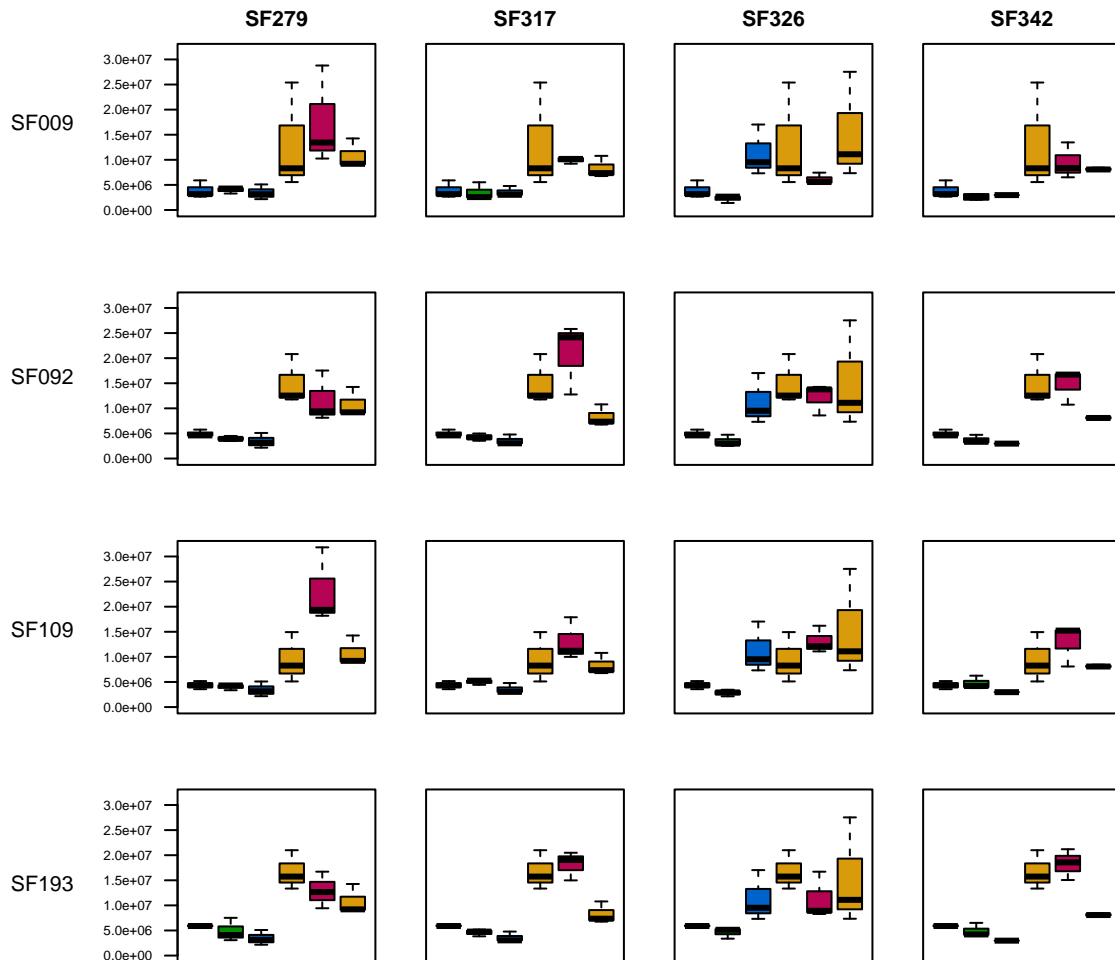

HanXRQChr10g0310521  
 Probable desiccation-related protein  
 PCC13-62

Parents WW  
 Parents WD  
 Hybrids WW  
 Hybrids WD

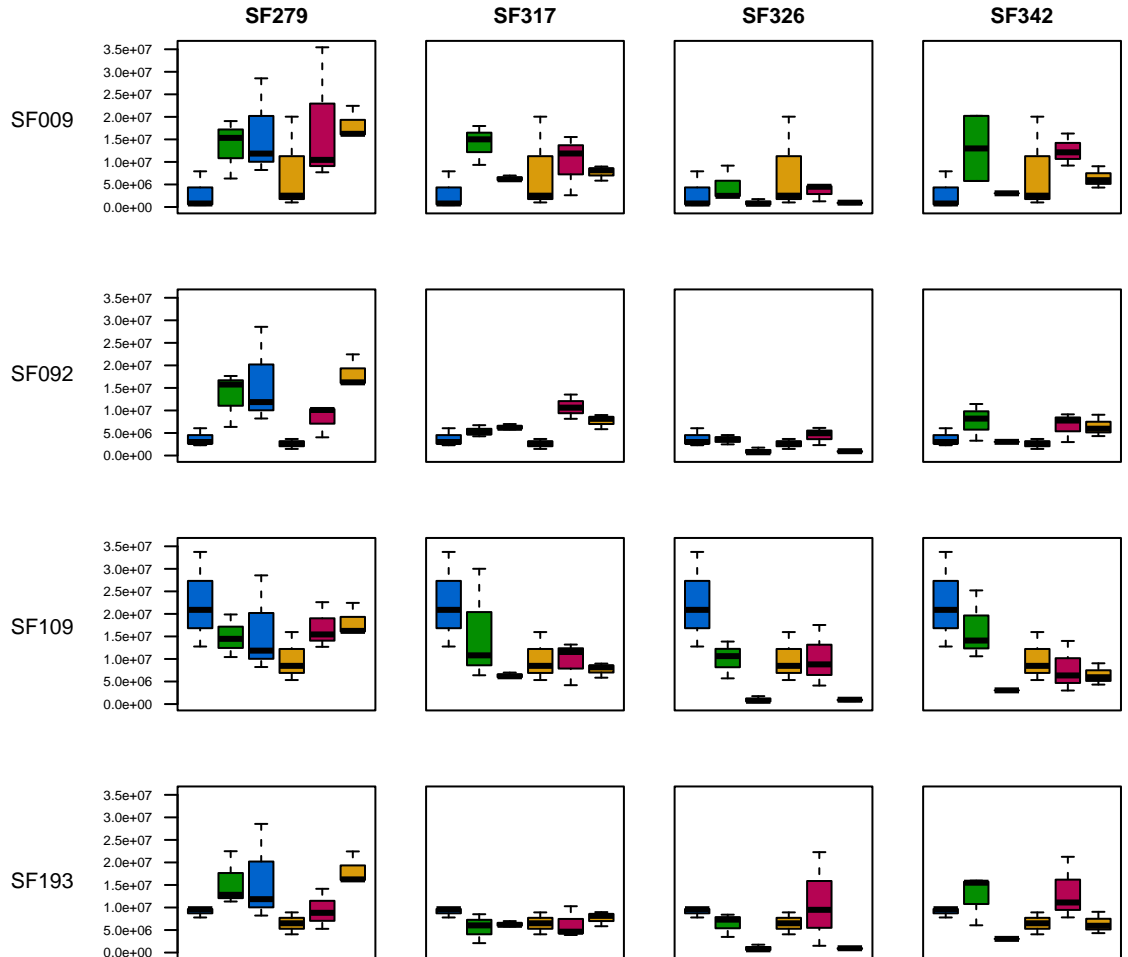

HanXRQChr10g0289411  
Probable insulinase (Peptidase family  
M16) family protein

Parents WW  
Parents WD  
Hybrids WW  
Hybrids WD

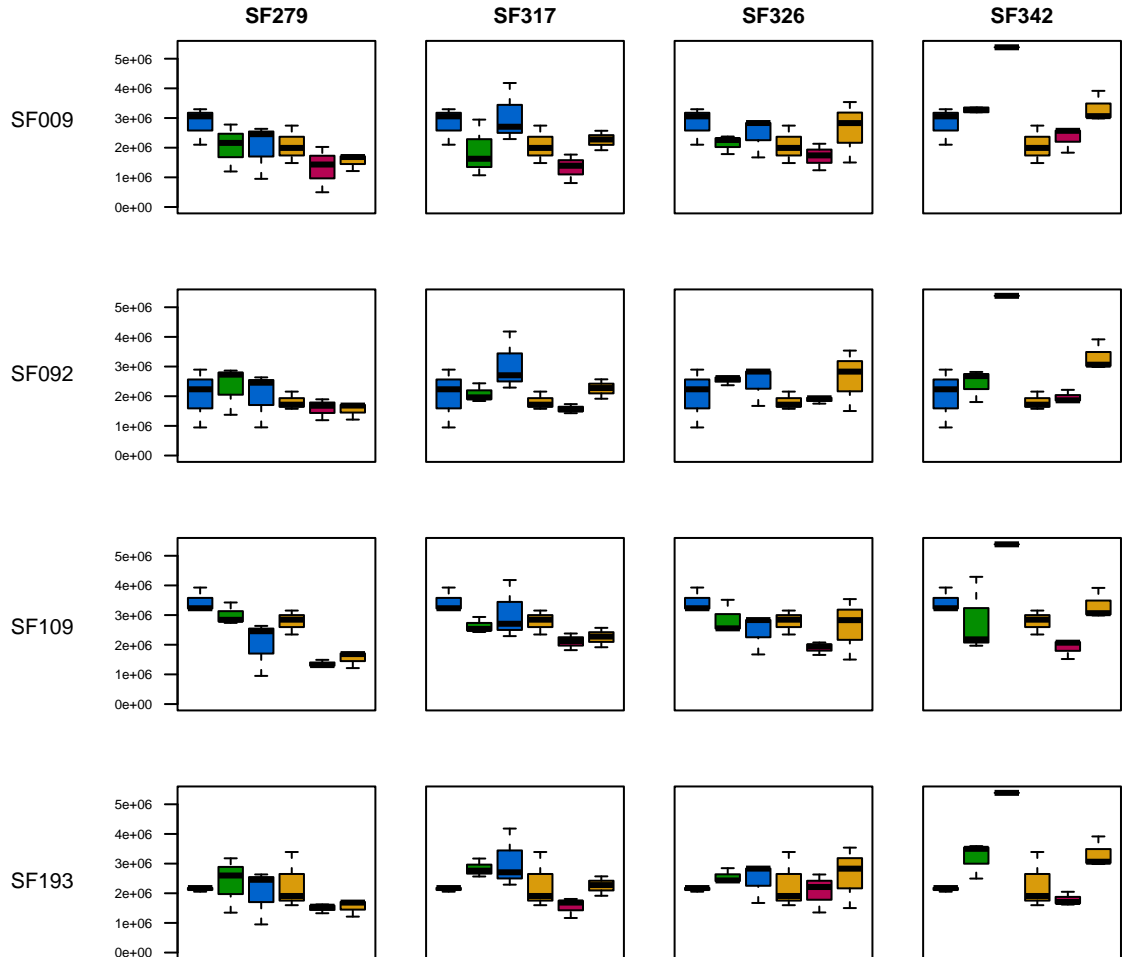

HanXRQChr10g0299441  
Probable elongation factor 1- $\gamma$  2

Parents WW  
Parents WD  
Hybrids WW  
Hybrids WD

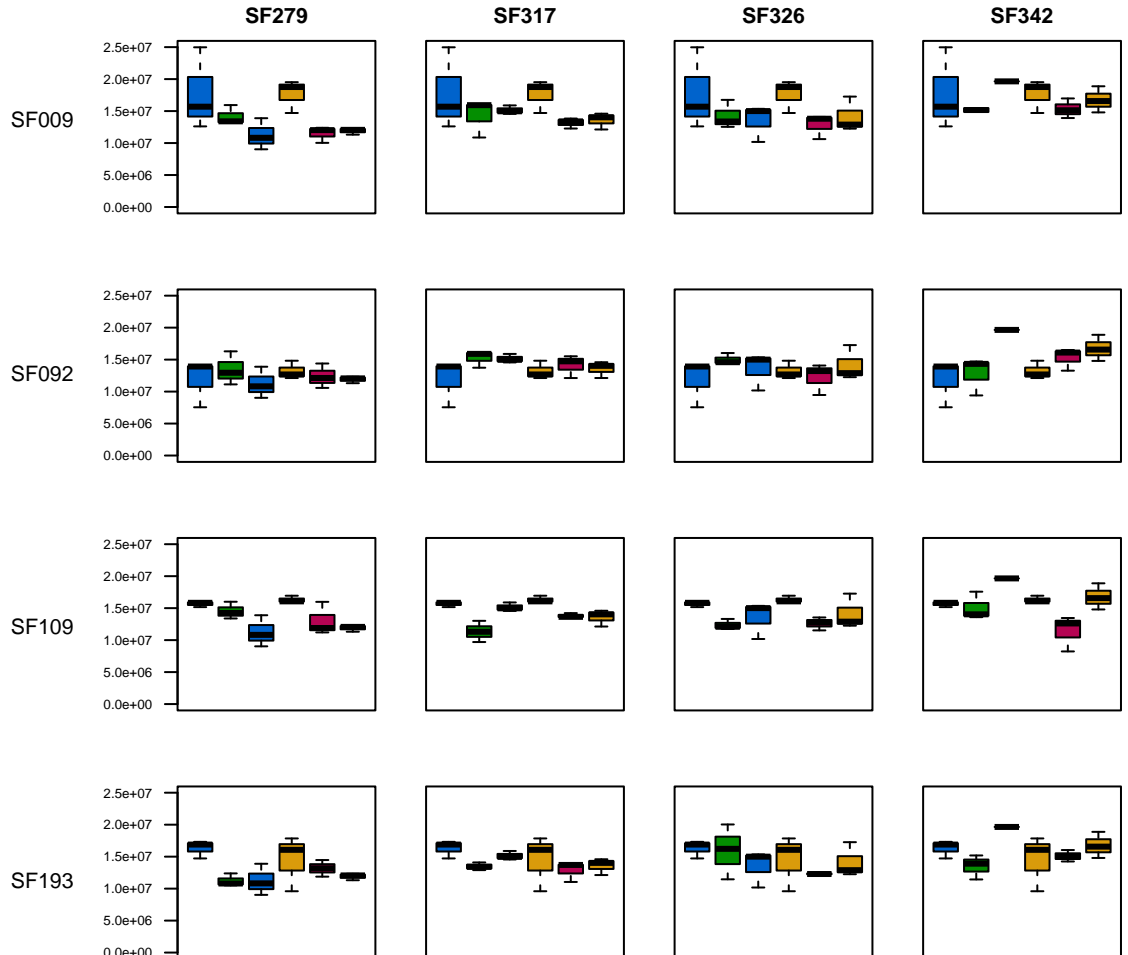



HanXRQChr08g0221961  
Probable ferritin 4

Parents WW  
Parents WD  
Hybrids WW  
Hybrids WD

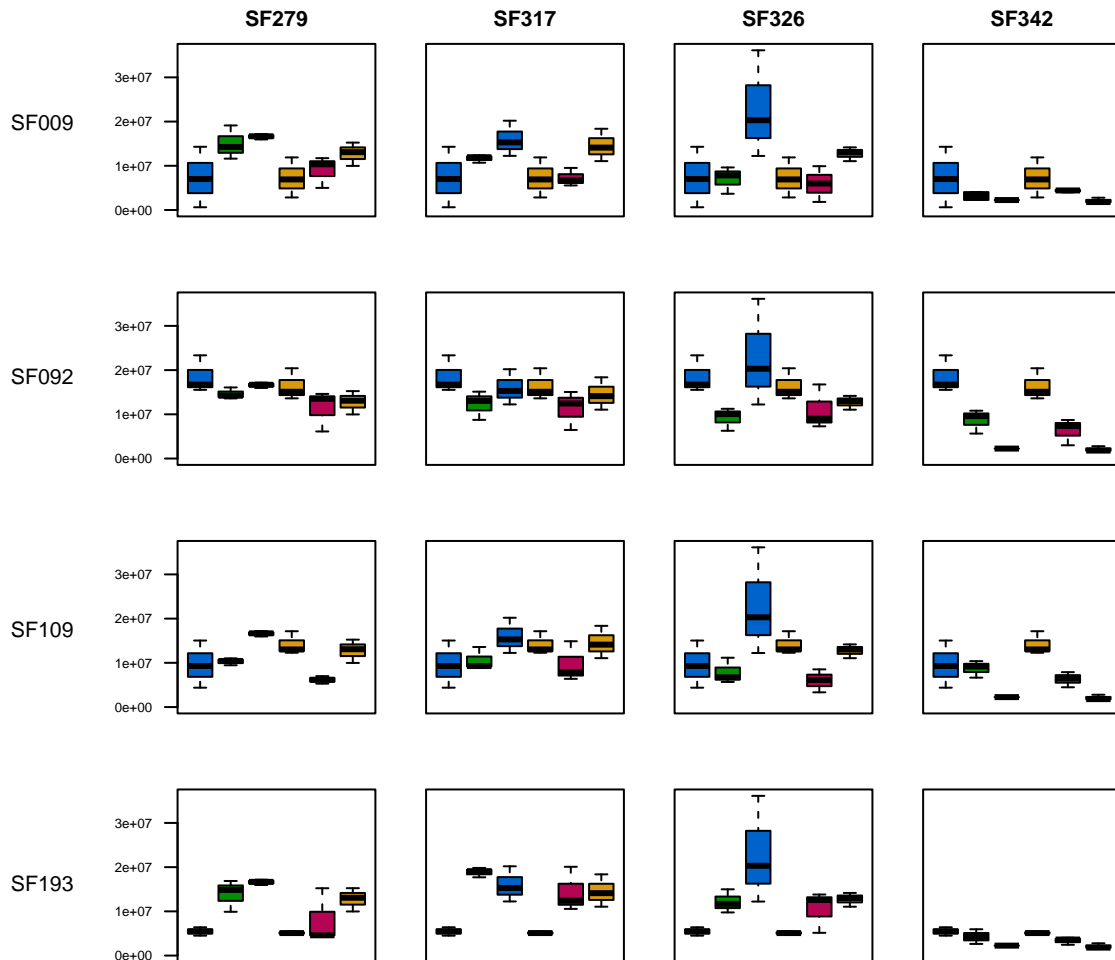

HanXRQChr15g0493231  
Probable heat shock cognate 70 kDa  
protein 2

Parents WW  
Parents WD  
Hybrids WW  
Hybrids WD

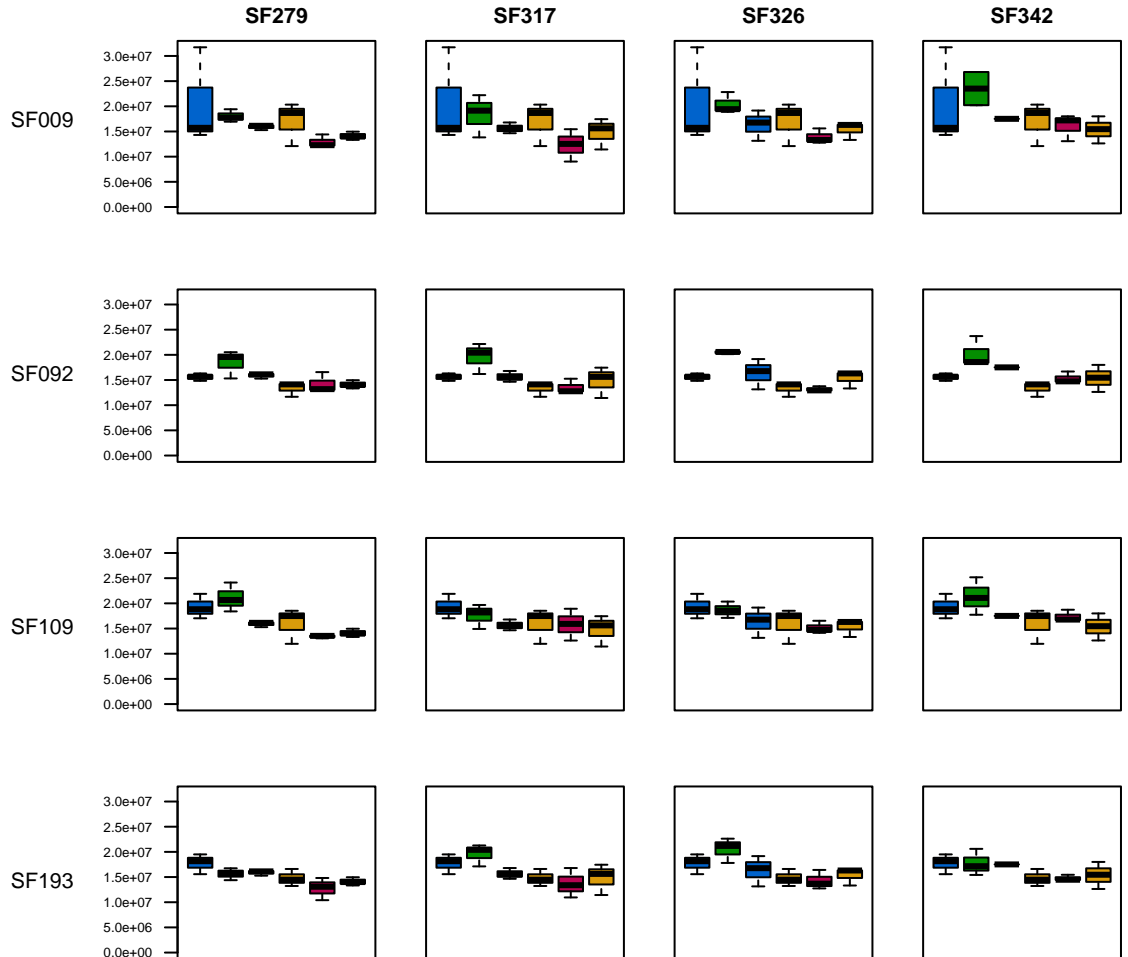

HanXRQChr03g0080391  
Probable heat shock cognate protein 80

- Parents WW
- Parents WD
- Hybrids WW
- Hybrids WD

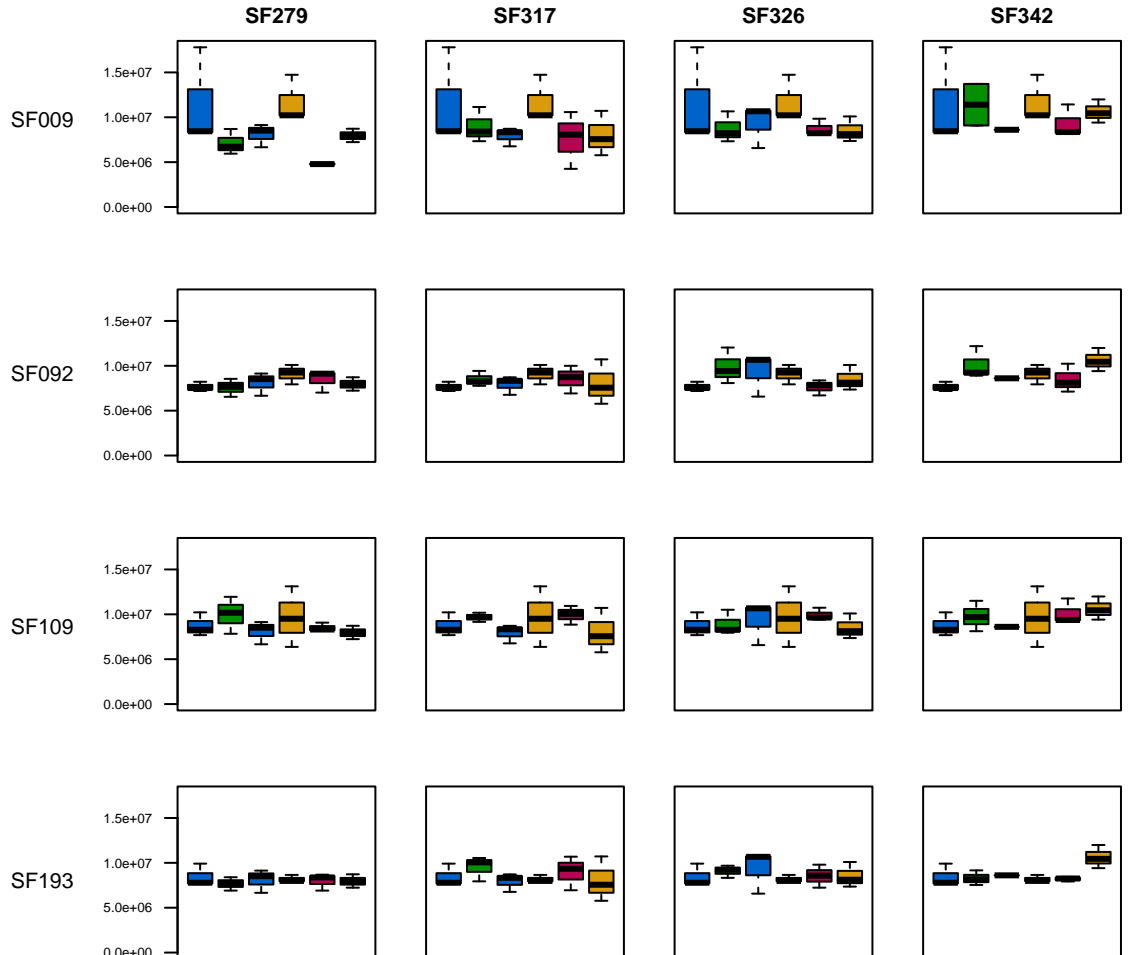

HanXRQChr05g0148381  
Probable S-adenosylmethionine synthase :

Parents WW  
Parents WD  
Hybrids WW  
Hybrids WD

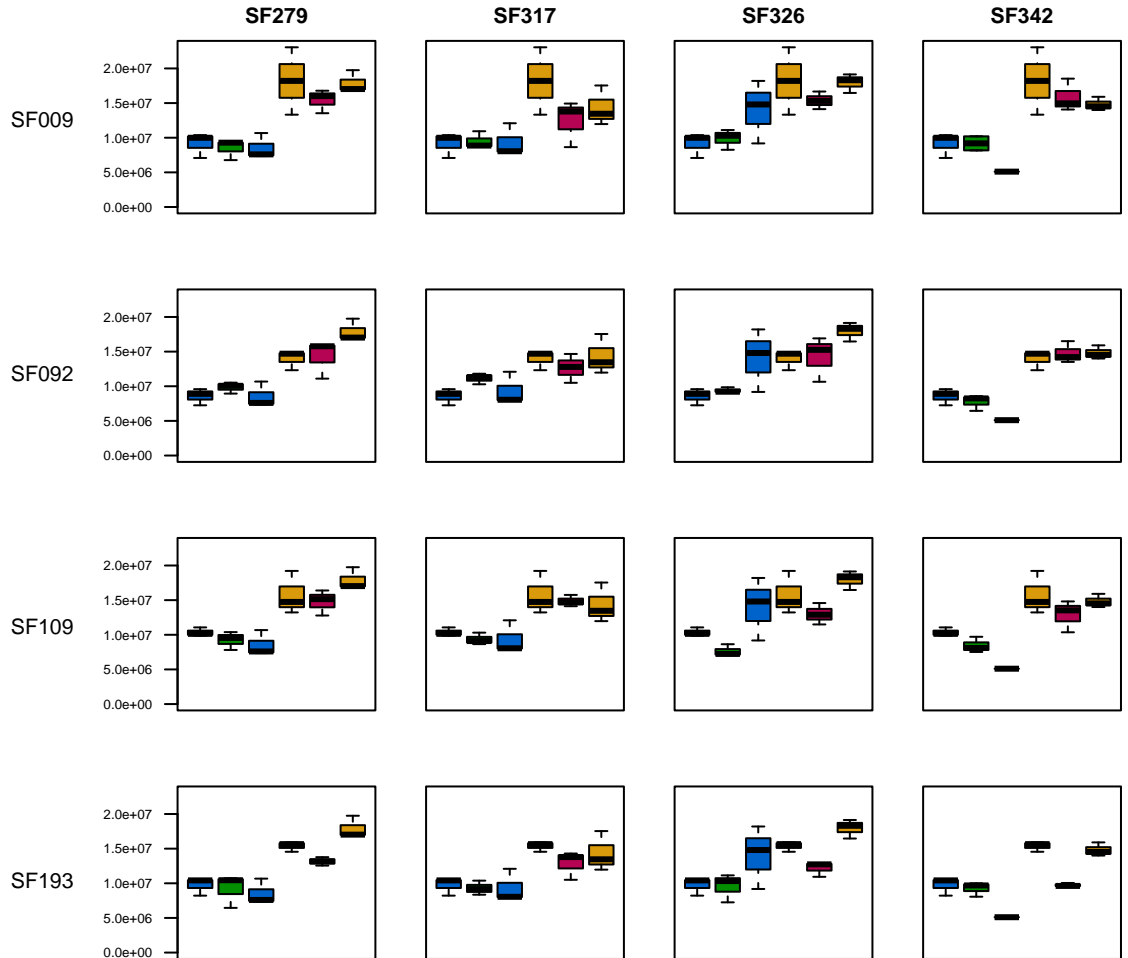

HanXRQChr11g0351571  
Putative glycoside hydrolase family 17;  
Glycoside hydrolase superfamily

Parents WW  
Parents WD  
Hybrids WW  
Hybrids WD

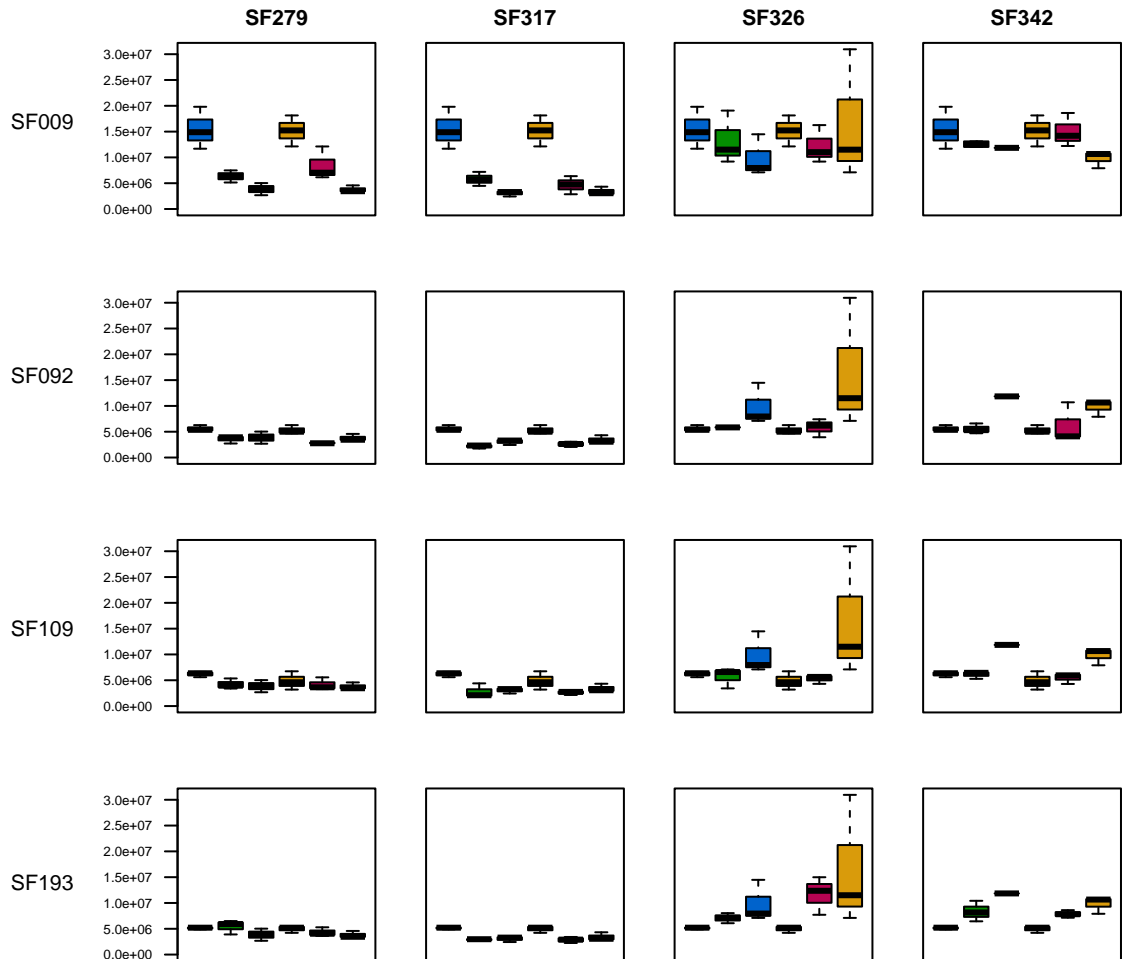

HanXRQChr09g0277241  
Probable proteasome subunit alpha type-5

Parents WW  
Parents WD  
Hybrids WW  
Hybrids WD

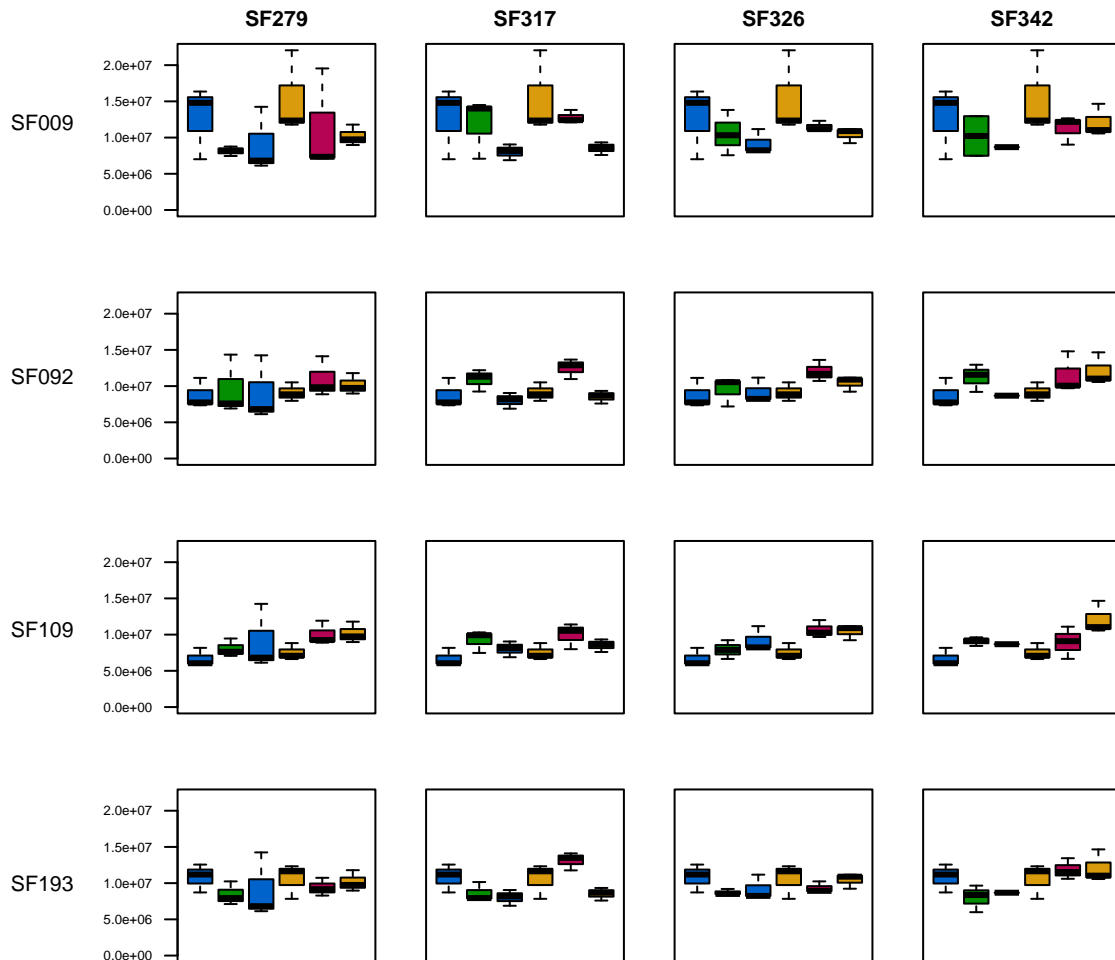

HanXRQChr06g0171911  
Probable 40S ribosomal protein S3-A

- Parents WW
- Parents WD
- Hybrids WW
- Hybrids WD

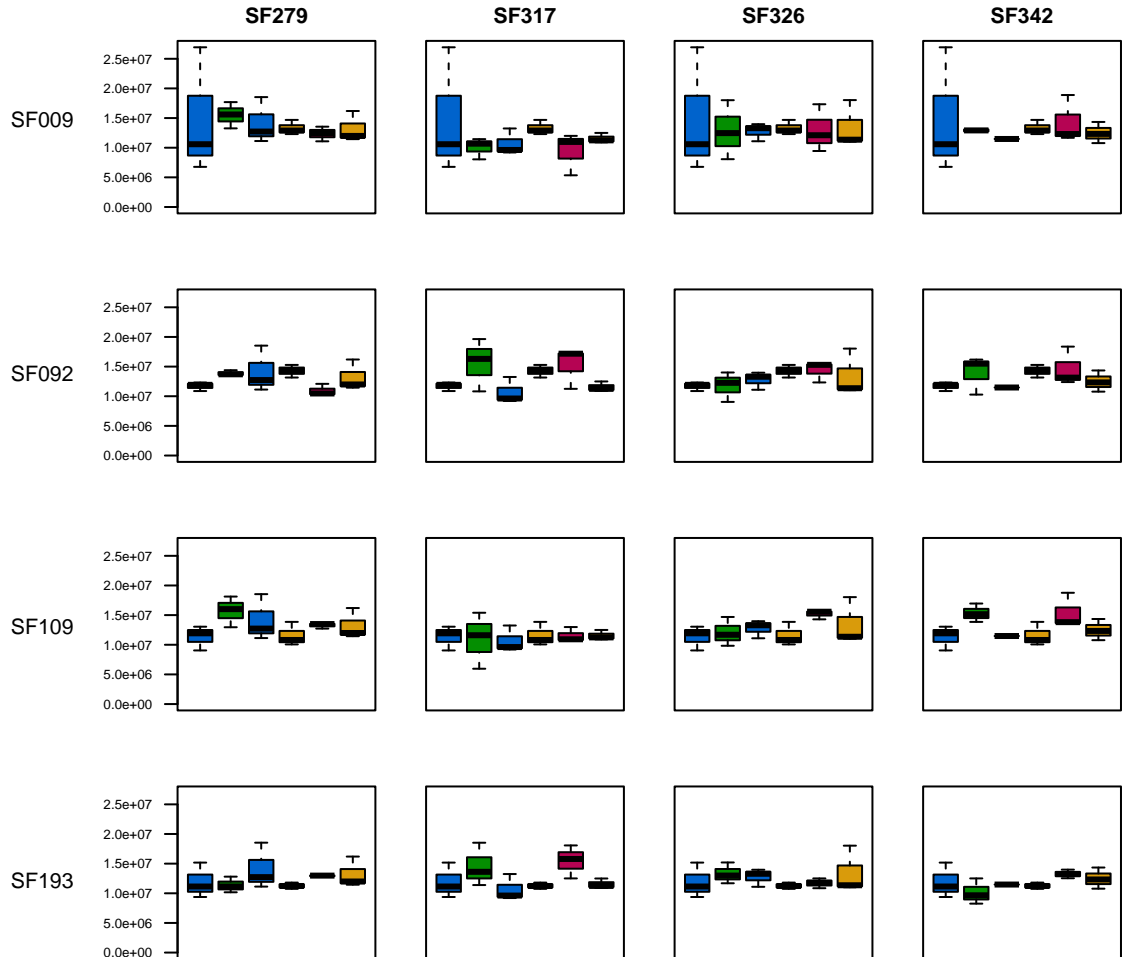

HanXRQChr01g0023821  
Probable fructokinase-2

Parents WW  
Parents WD  
Hybrids WW  
Hybrids WD

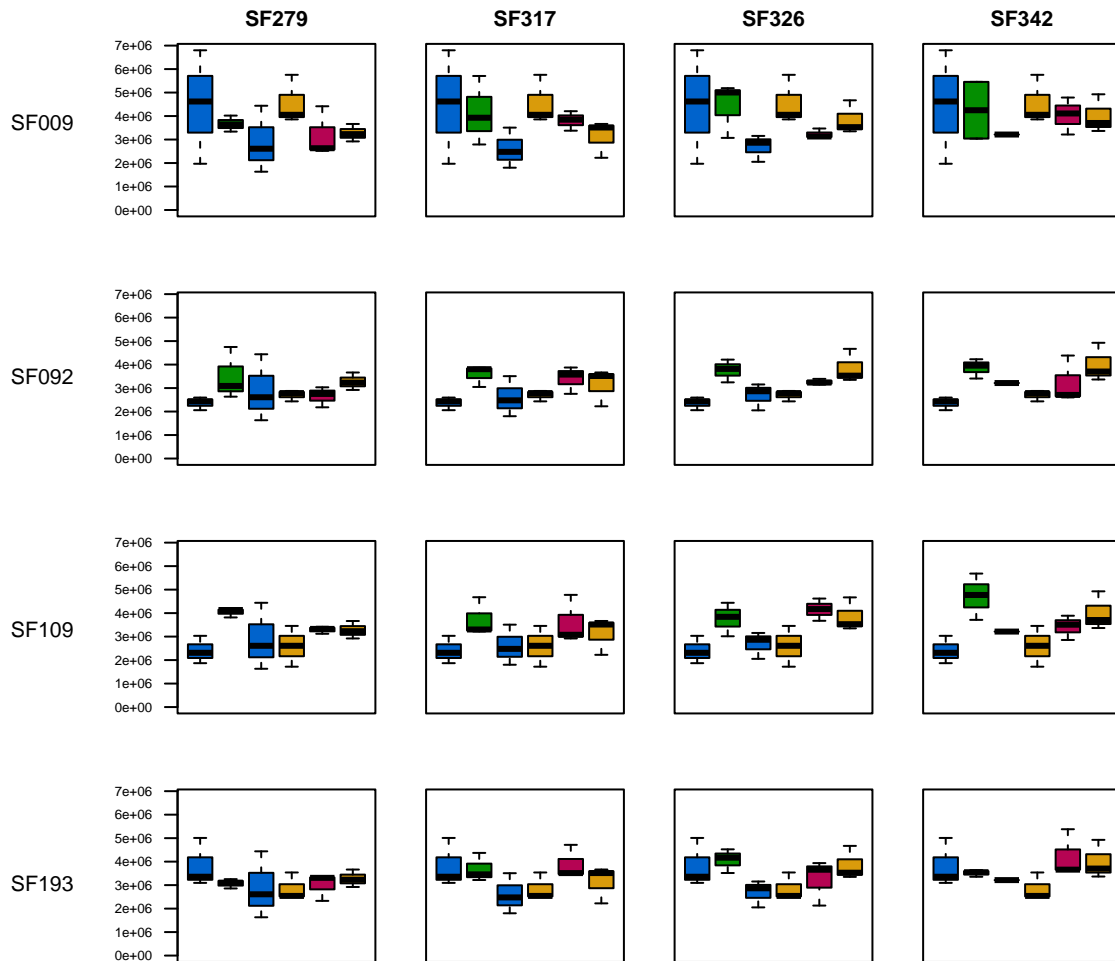



HanXRQChr15g0475151  
 Probable glucose-6-phosphate  
 1-dehydrogenase, cytoplasmic isoform

Parents WW  
 Parents WD  
 Hybrids WW  
 Hybrids WD

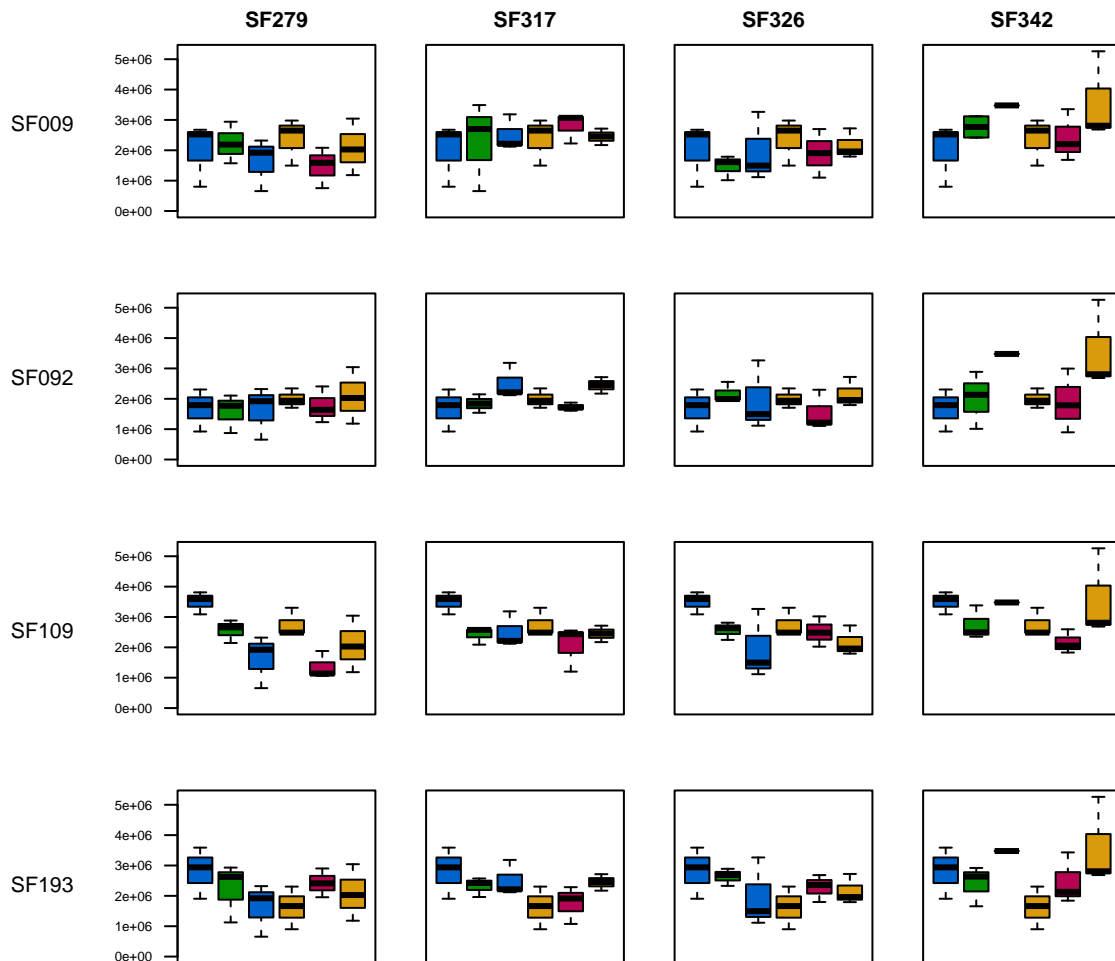

HanXRQChr15g0495351  
Probable methionine sulfoxide reductase  
B 1

Parents WW  
Parents WD  
Hybrids WW  
Hybrids WD

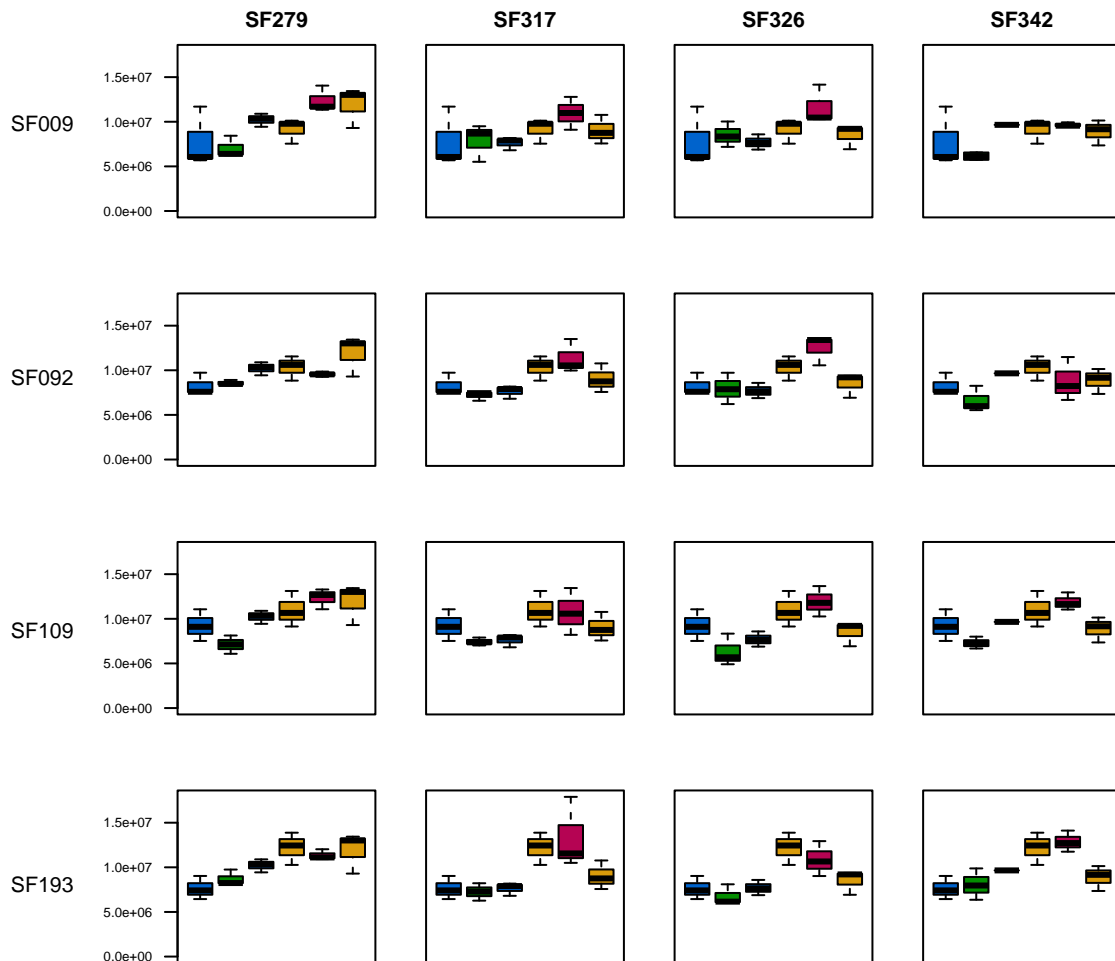

HanXRQChr06g0172011  
 Probable eukaryotic initiation factor  
 4A-3

Parents WW  
 Parents WD  
 Hybrids WW  
 Hybrids WD

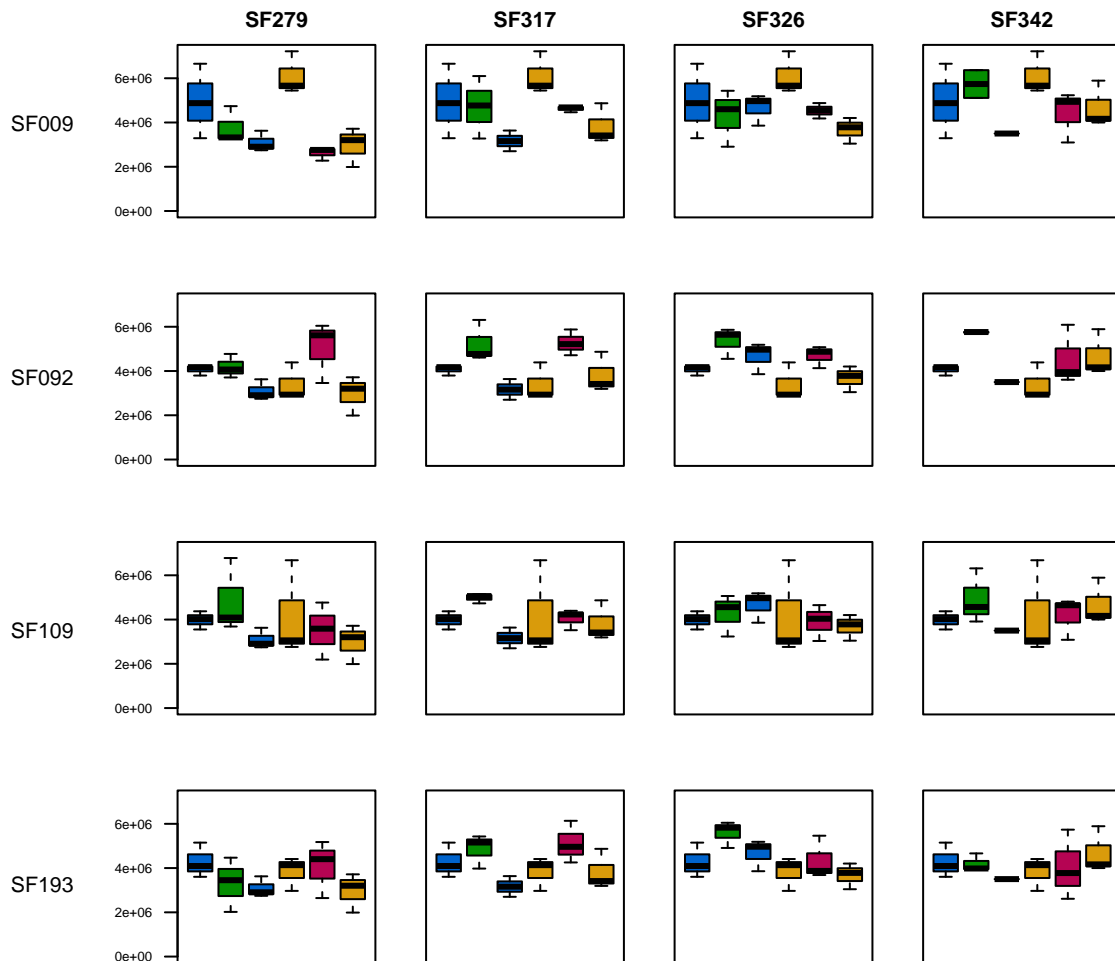

HanXRQChr10g0315681  
 Uncharacterized protein, conserved in  
 plant genome(s), supported by expression c

Parents WW  
 Parents WD  
 Hybrids WW  
 Hybrids WD

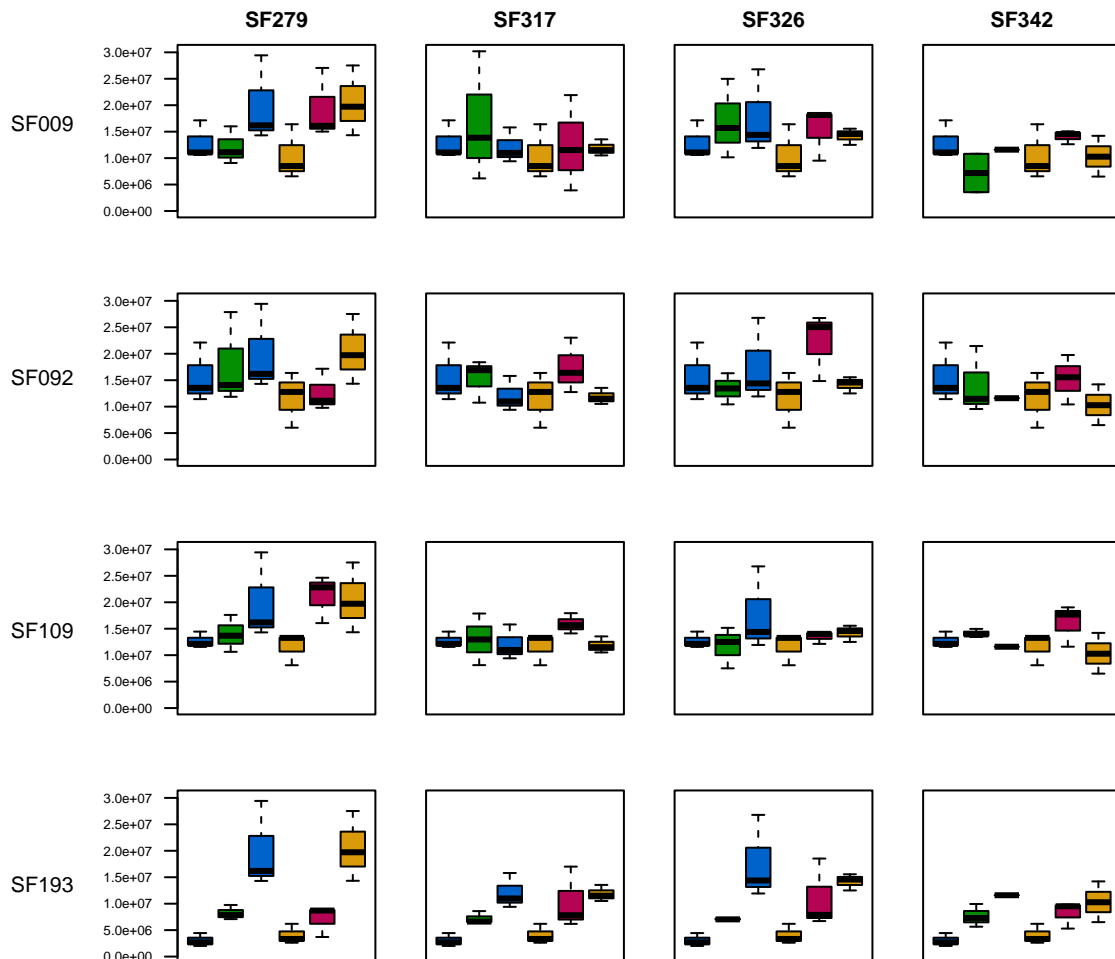

HanXRQChr01g0021711  
Probable catalytics;carbohydrate  
kinases;phosphoglucan, water dikinases

Parents WW  
Parents WD  
Hybrids WW  
Hybrids WD

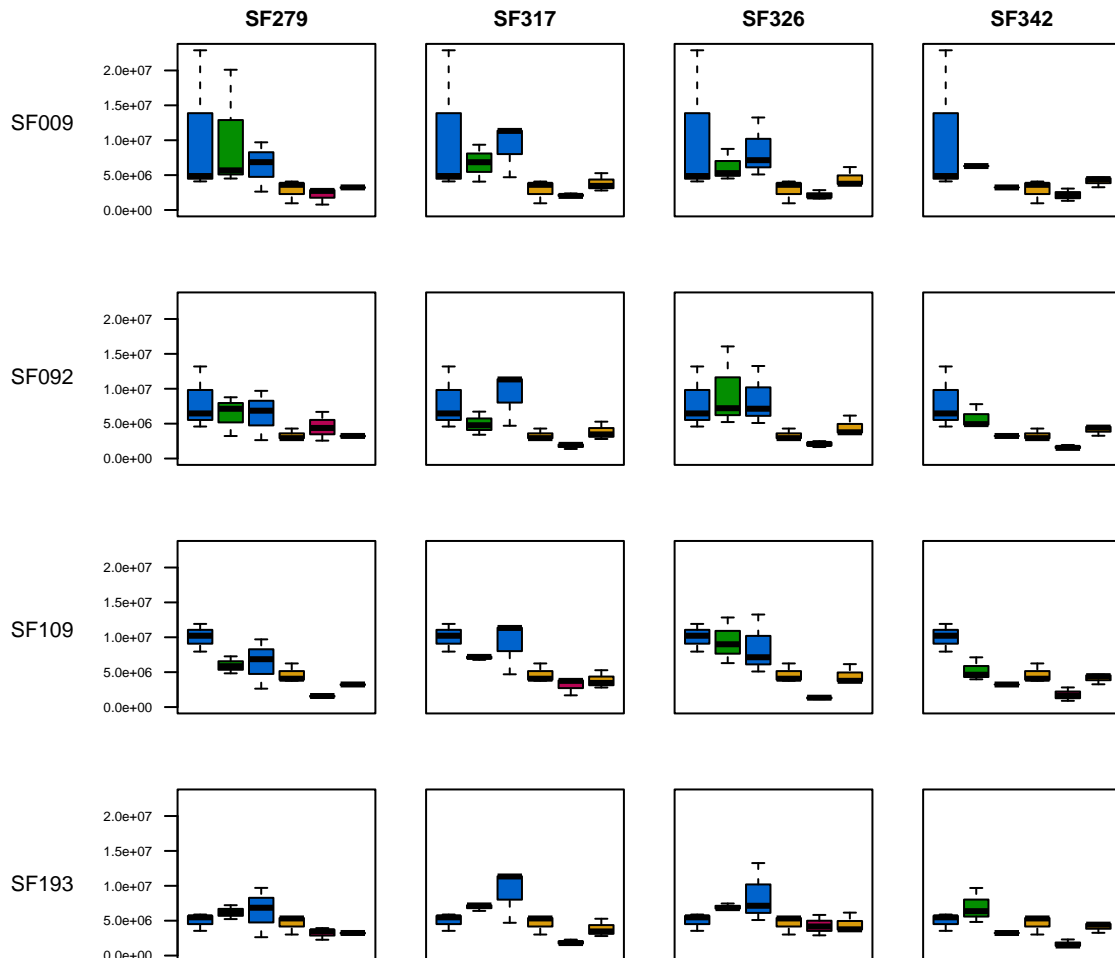

HanXRQChr01g0008071  
Probable nascent polypeptide-associated  
complex subunit alpha-like protein 3

Parents WW  
Parents WD  
Hybrids WW  
Hybrids WD

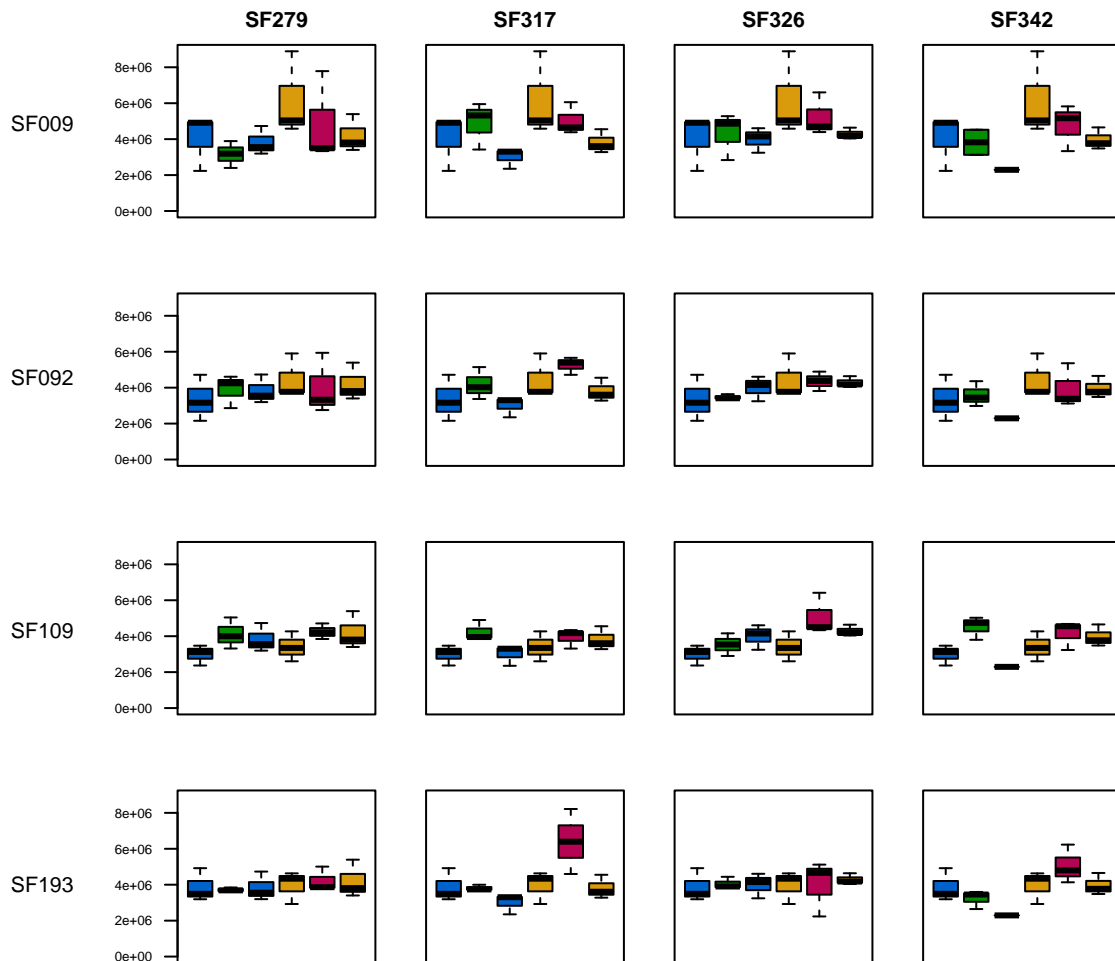

HanXRQChr16g0504721  
Probable elongation factor TuA,  
chloroplastic

Parents WW  
Parents WD  
Hybrids WW  
Hybrids WD

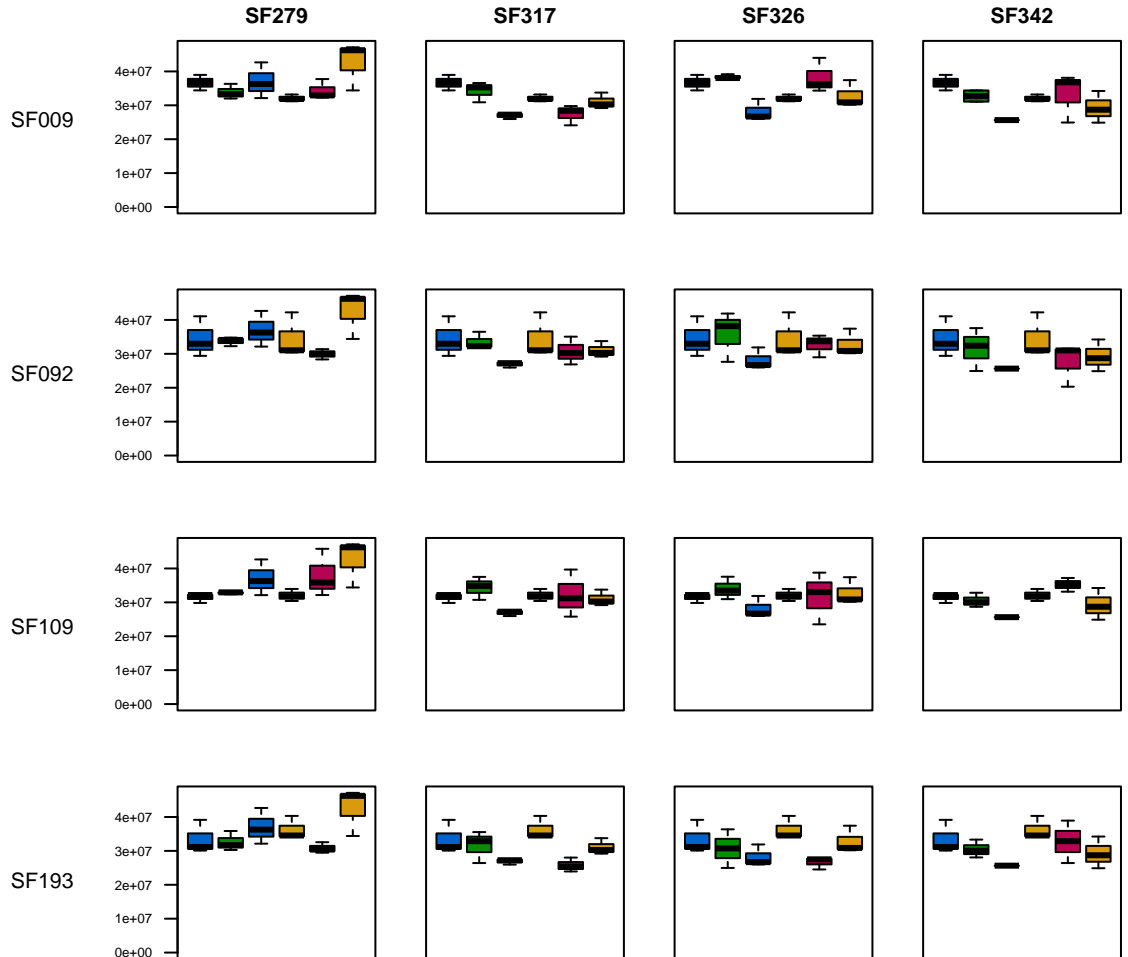

HanXRQChr13g0408231  
Putative *grpE* nucleotide exchange factor

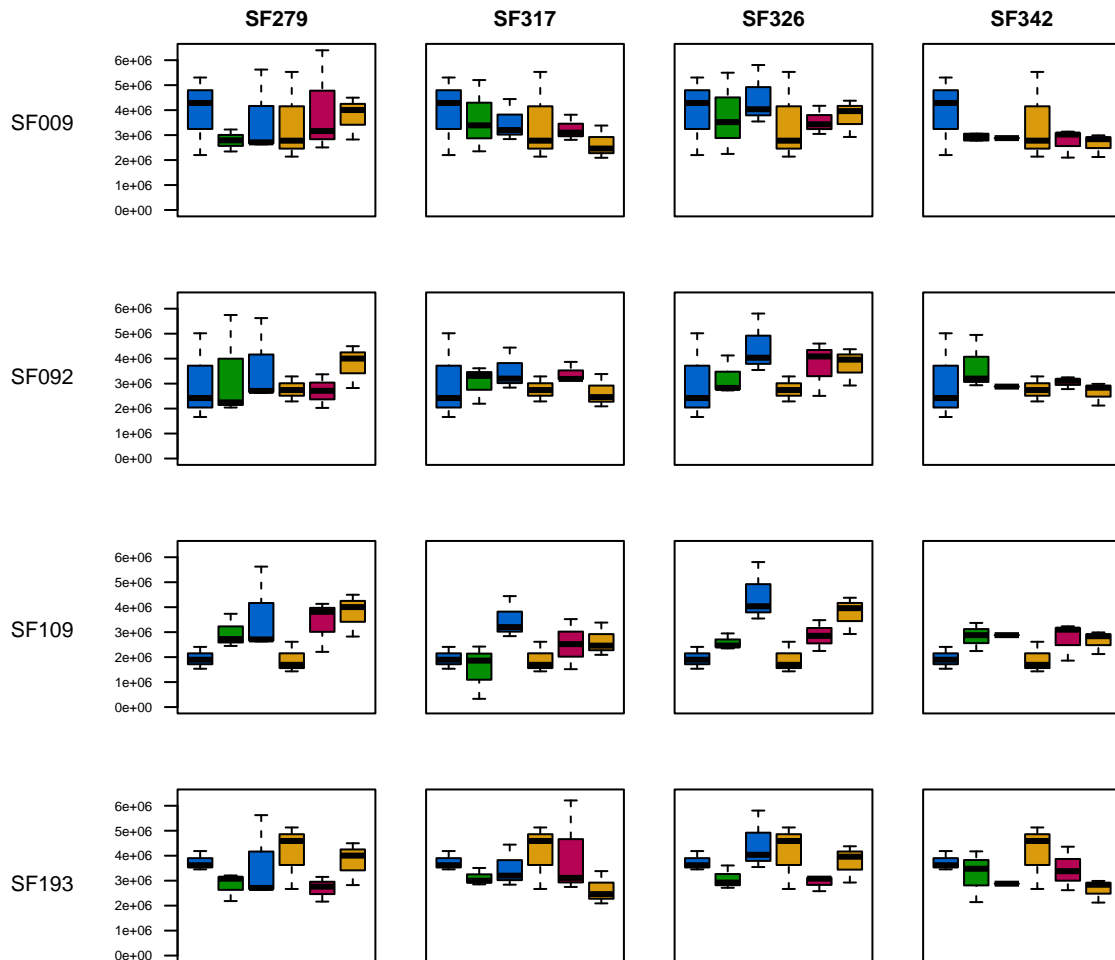



HanXRQChr02g0031661  
Probable aquaporin PIP2-5

Parents WW  
Parents WD  
Hybrids WW  
Hybrids WD

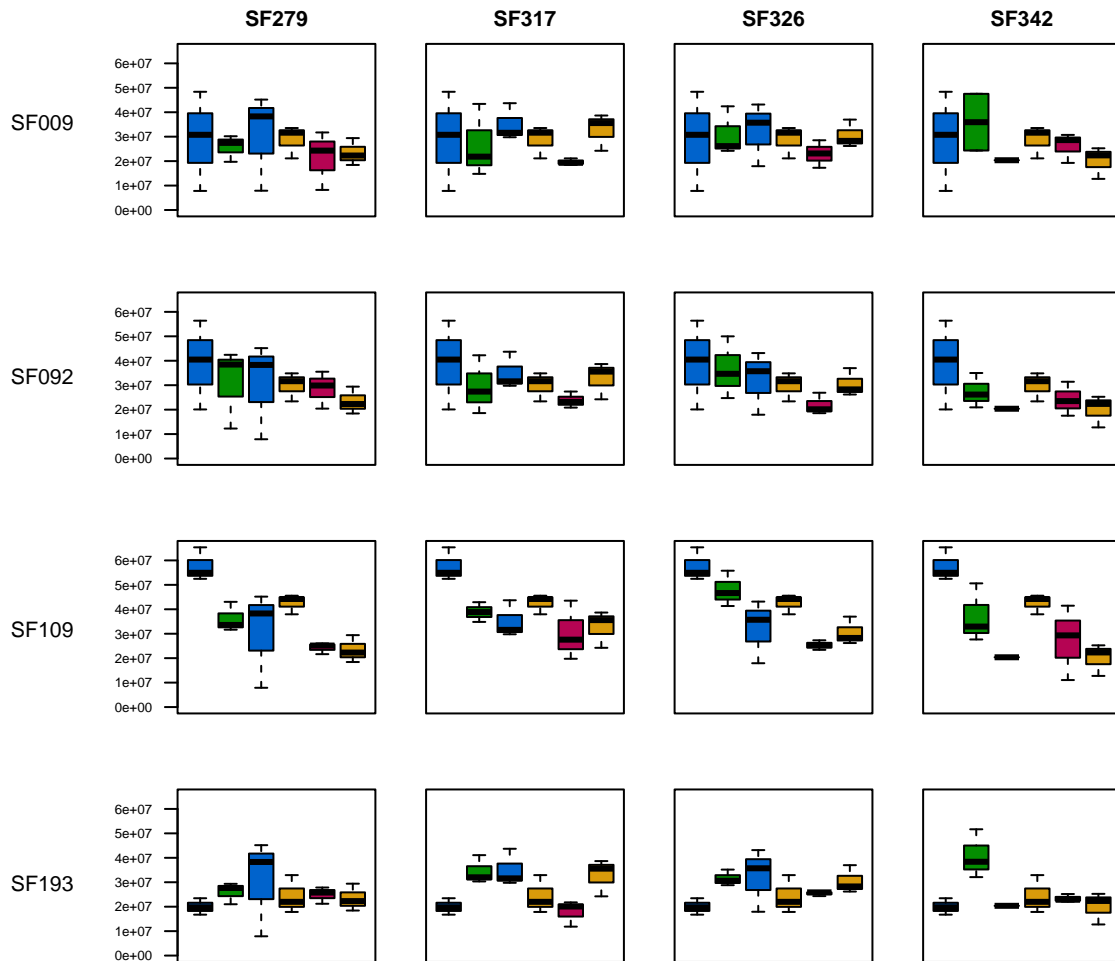

HanXRQChr17g0537111  
Probable acyl-CoA-binding protein

Parents WW  
Parents WD  
Hybrids WW  
Hybrids WD

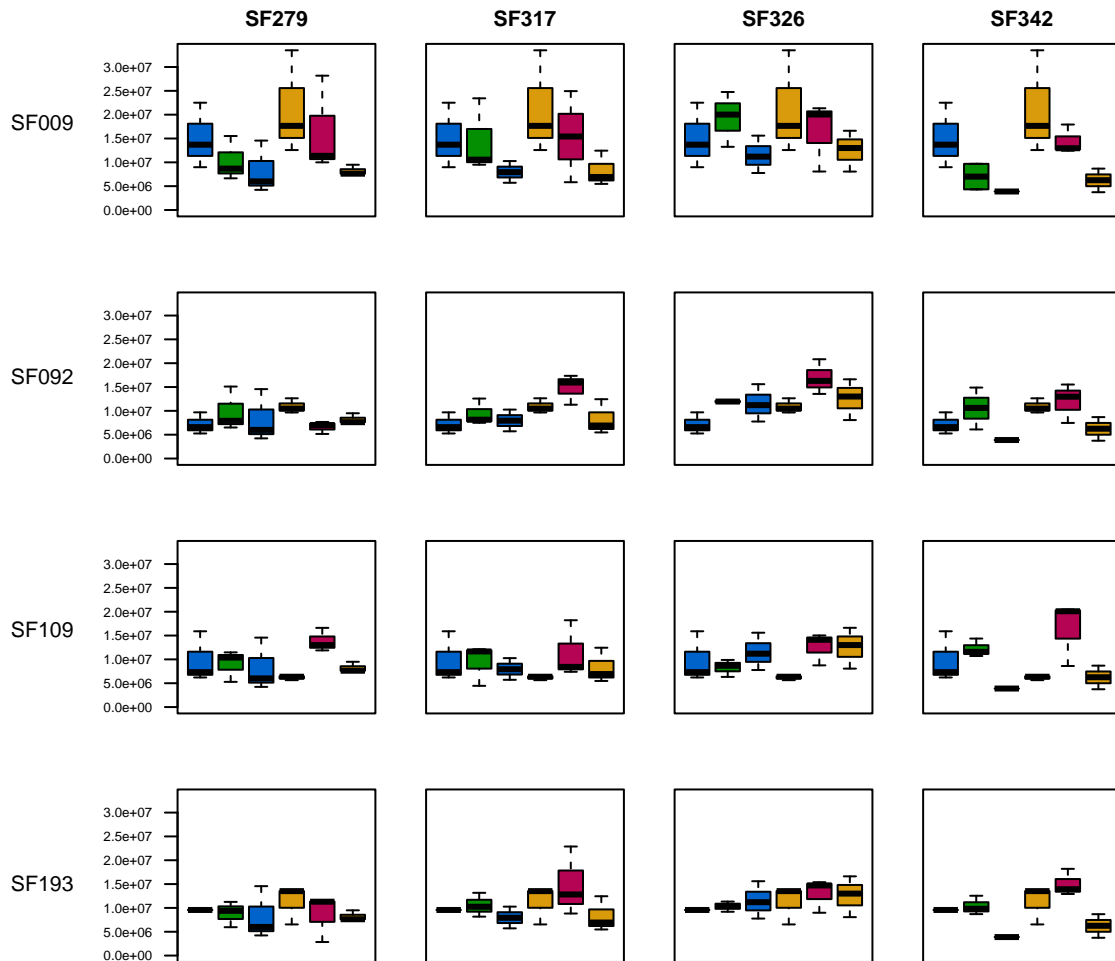

HanXRQChr09g0241661  
Putative DNA-binding domain

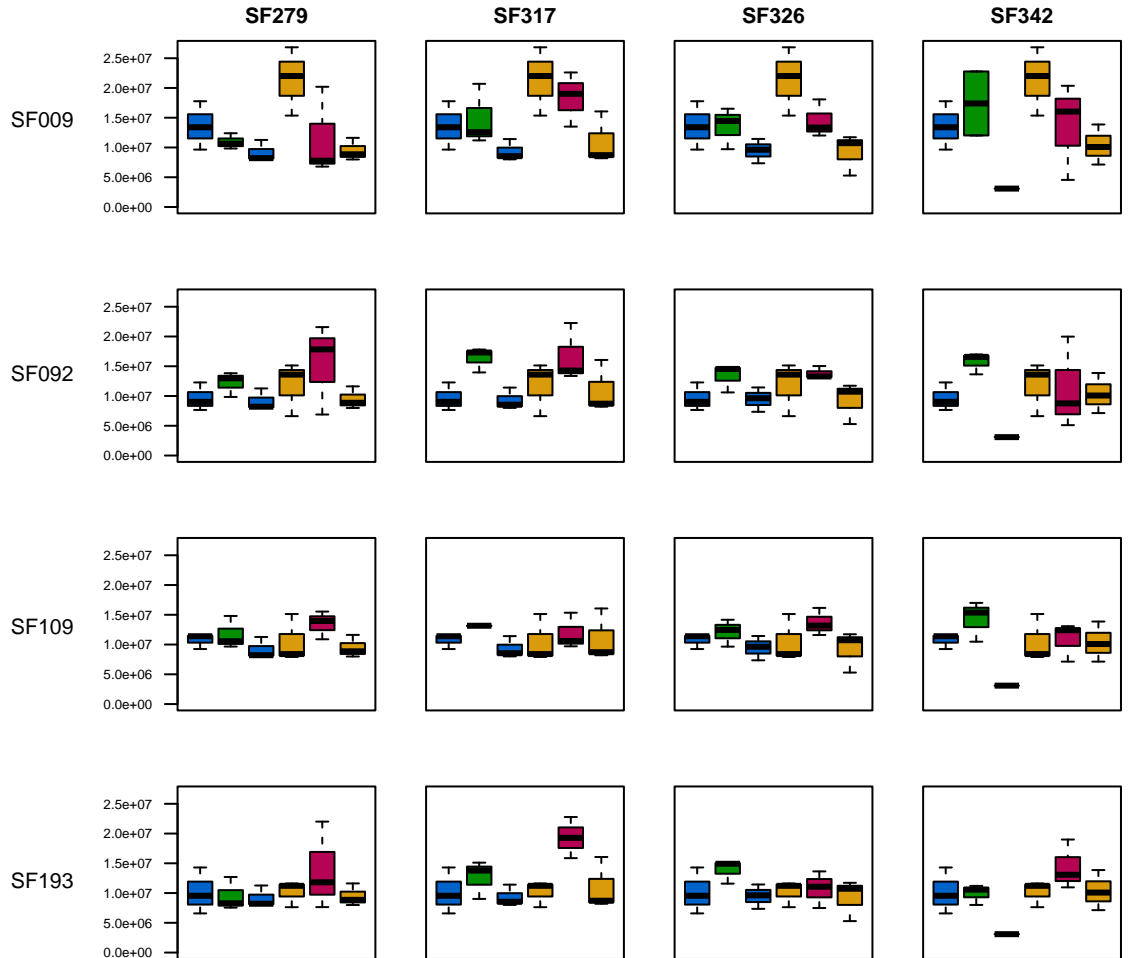

HanXRQCPg0579731  
Putative photosynthetic reaction  
centre, L/M

Parents WW  
Parents WD  
Hybrids WW  
Hybrids WD

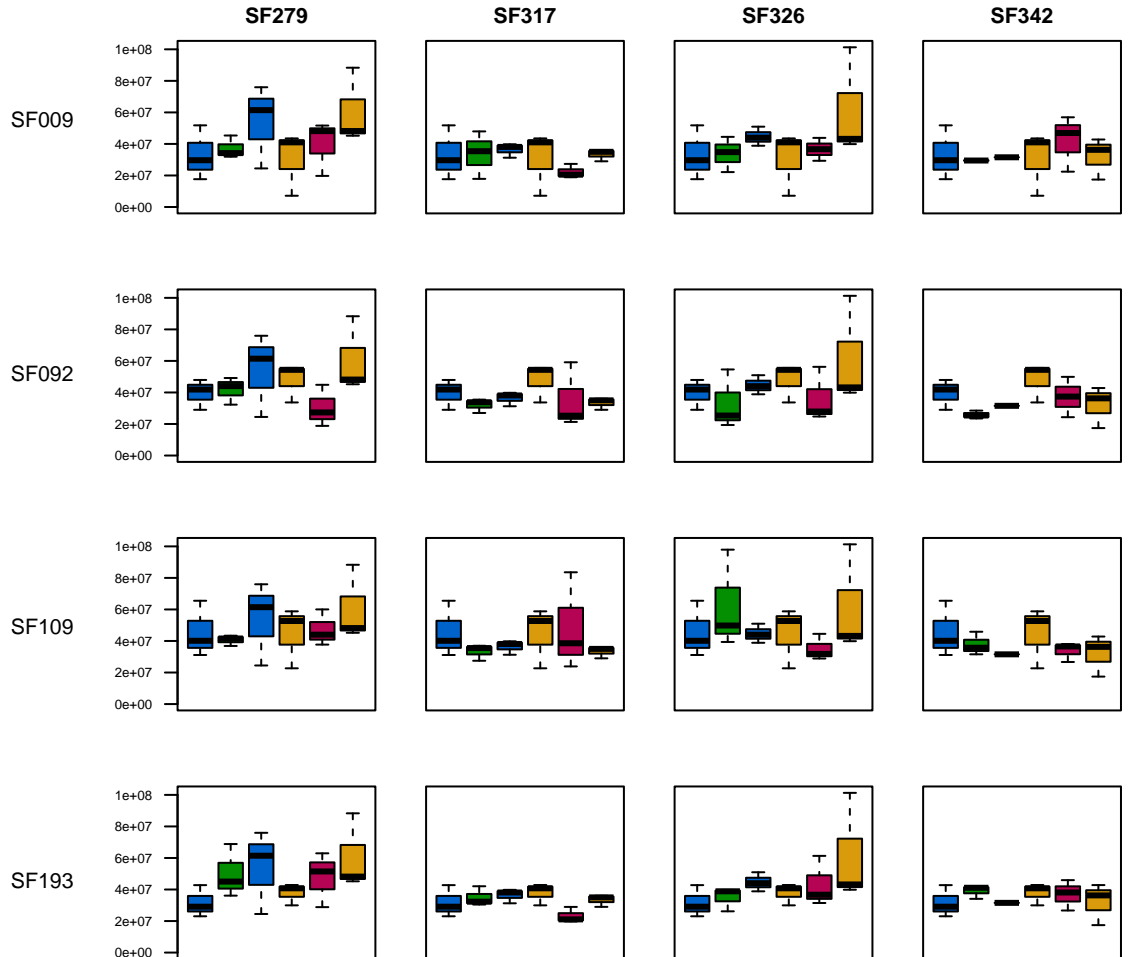

HanXRQChr12g0357021  
Protein of unknown function, DUF538

Parents WW  
Parents WD  
Hybrids WW  
Hybrids WD

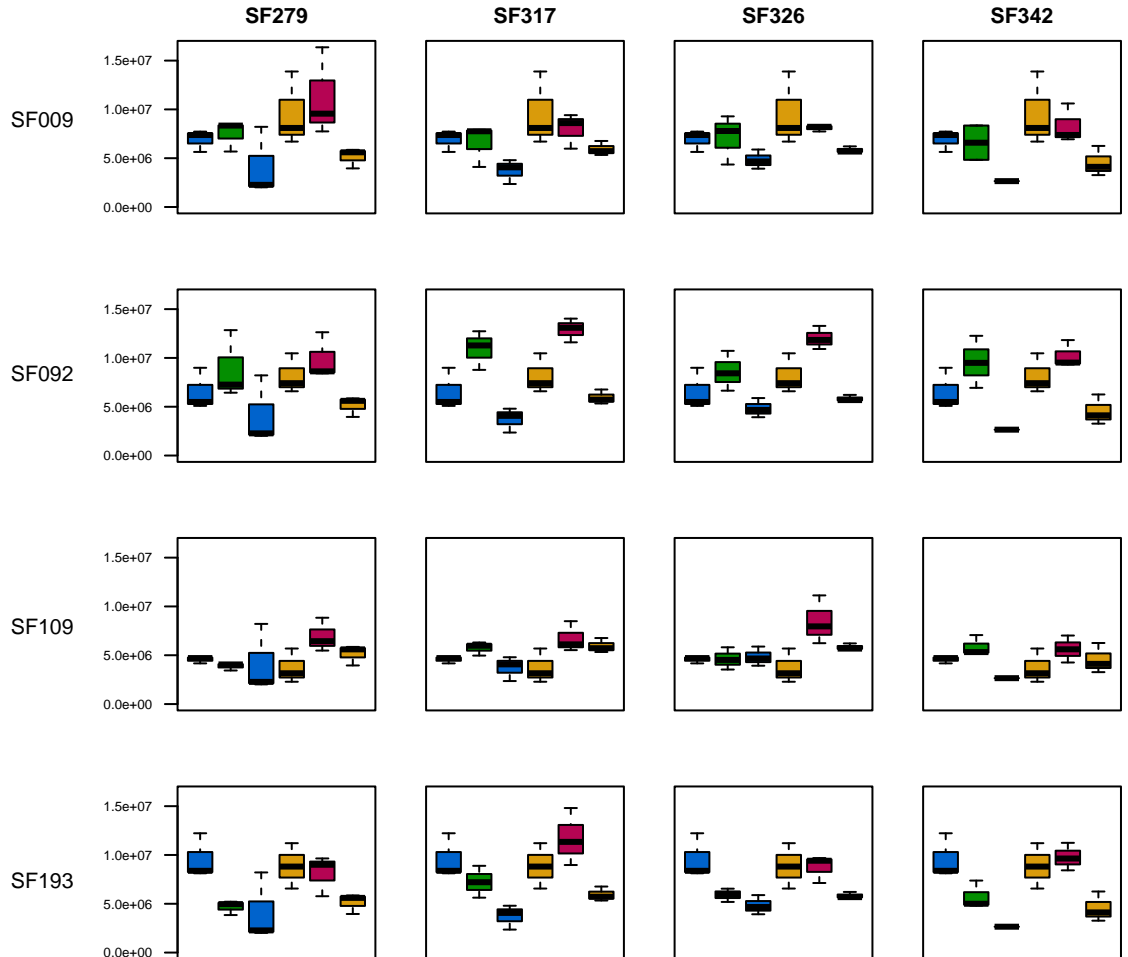

HanXRQChr11g0329391  
Probable acetoacetyl-CoA thiolase 2

Parents WW  
Parents WD  
Hybrids WW  
Hybrids WD

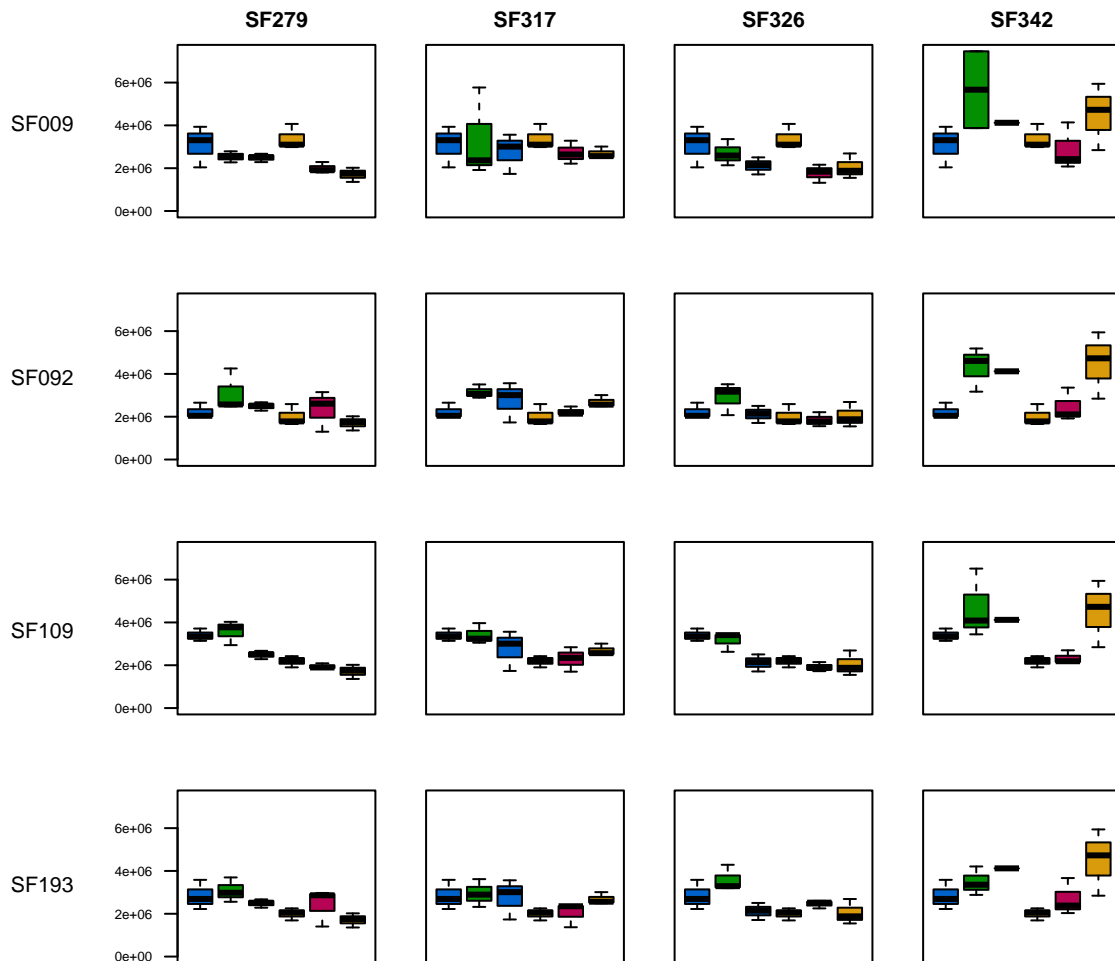

HanXRQChr07g0193521  
Probable non-symbiotic hemoglobin 2

- Parents WW
- Parents WD
- Hybrids WW
- Hybrids WD

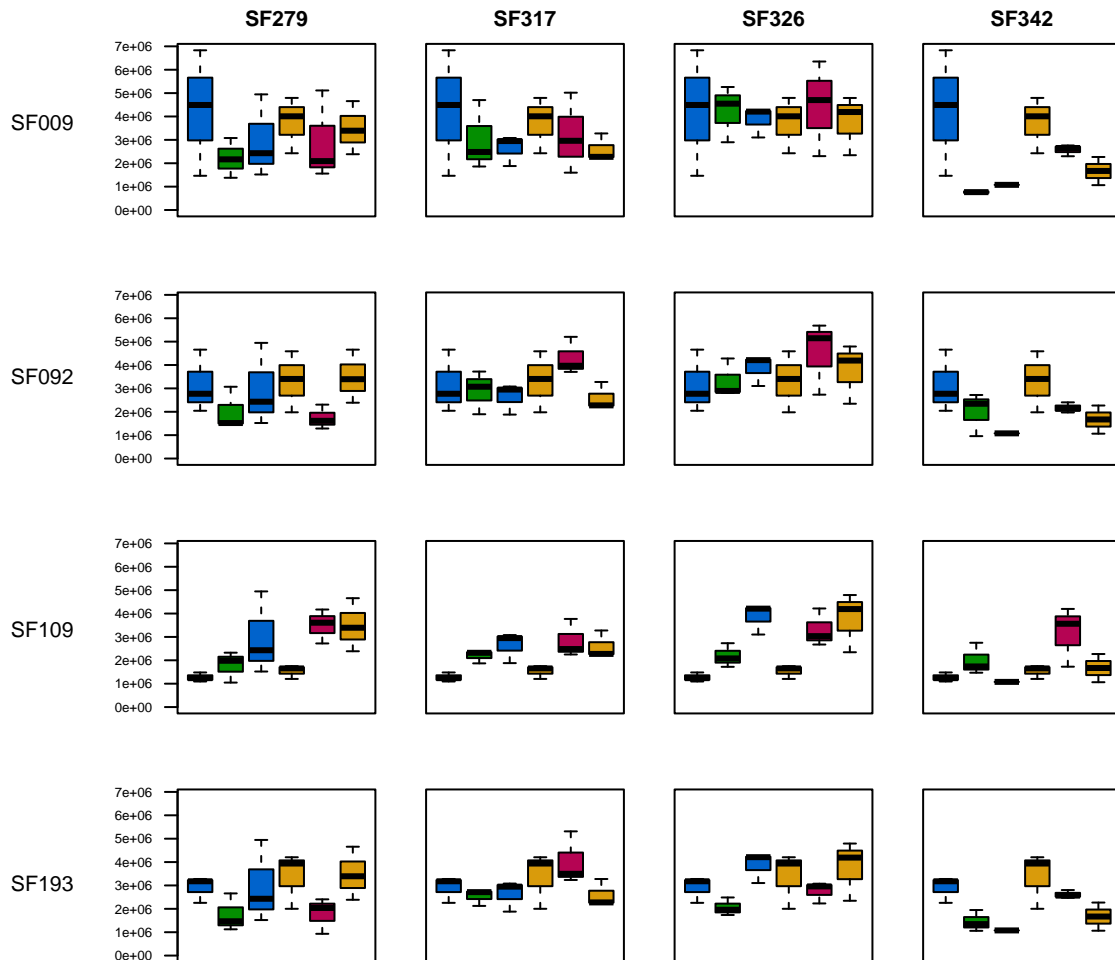

HanXRQChr14g0429861  
Putative sulphate adenylyltransferase;  
Sulphate adenylyltransferase, prokaryotic-t

Parents WW  
Parents WD  
Hybrids WW  
Hybrids WD

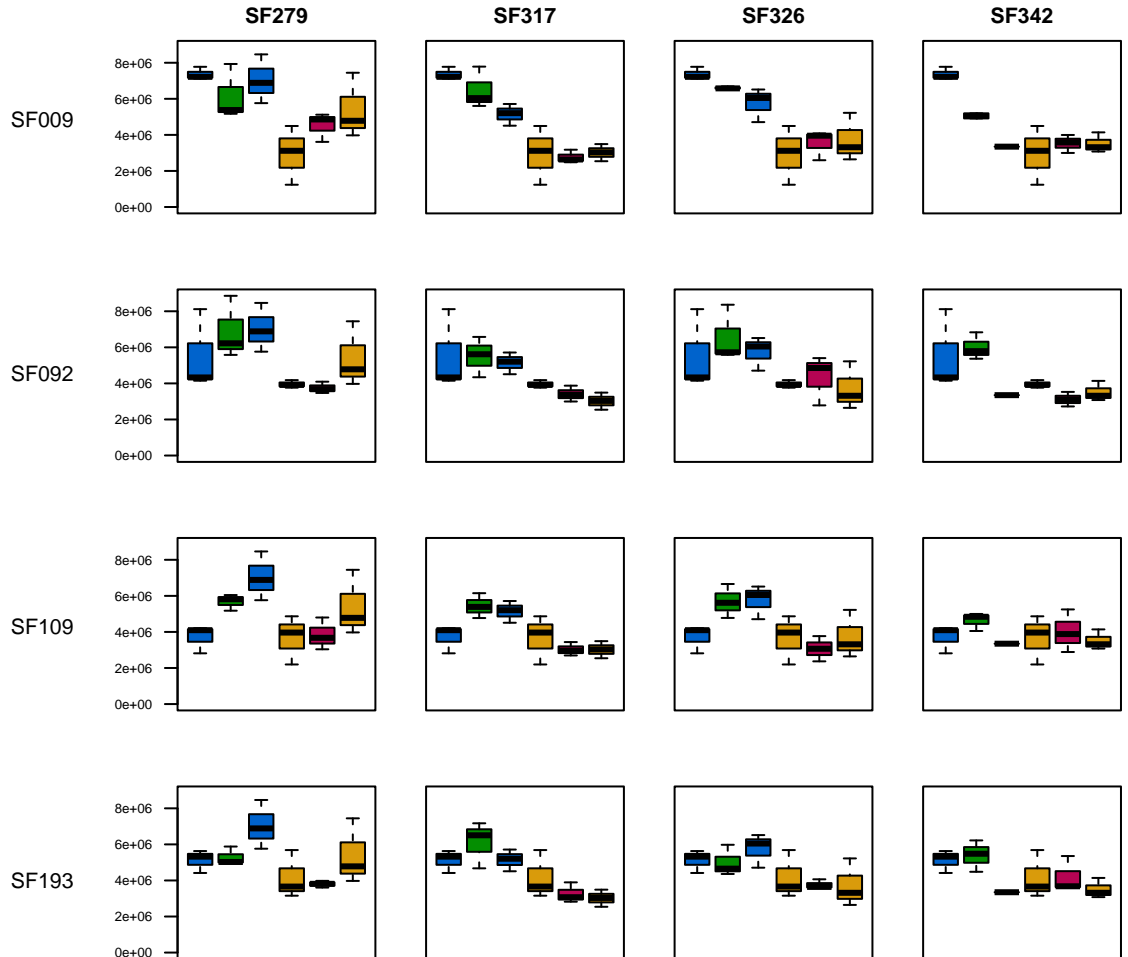



HanXRQChr04g0117261  
 Probable chlorophyll a-b binding  
 protein AB80, chloroplastic

Parents WW  
 Parents WD  
 Hybrids WW  
 Hybrids WD

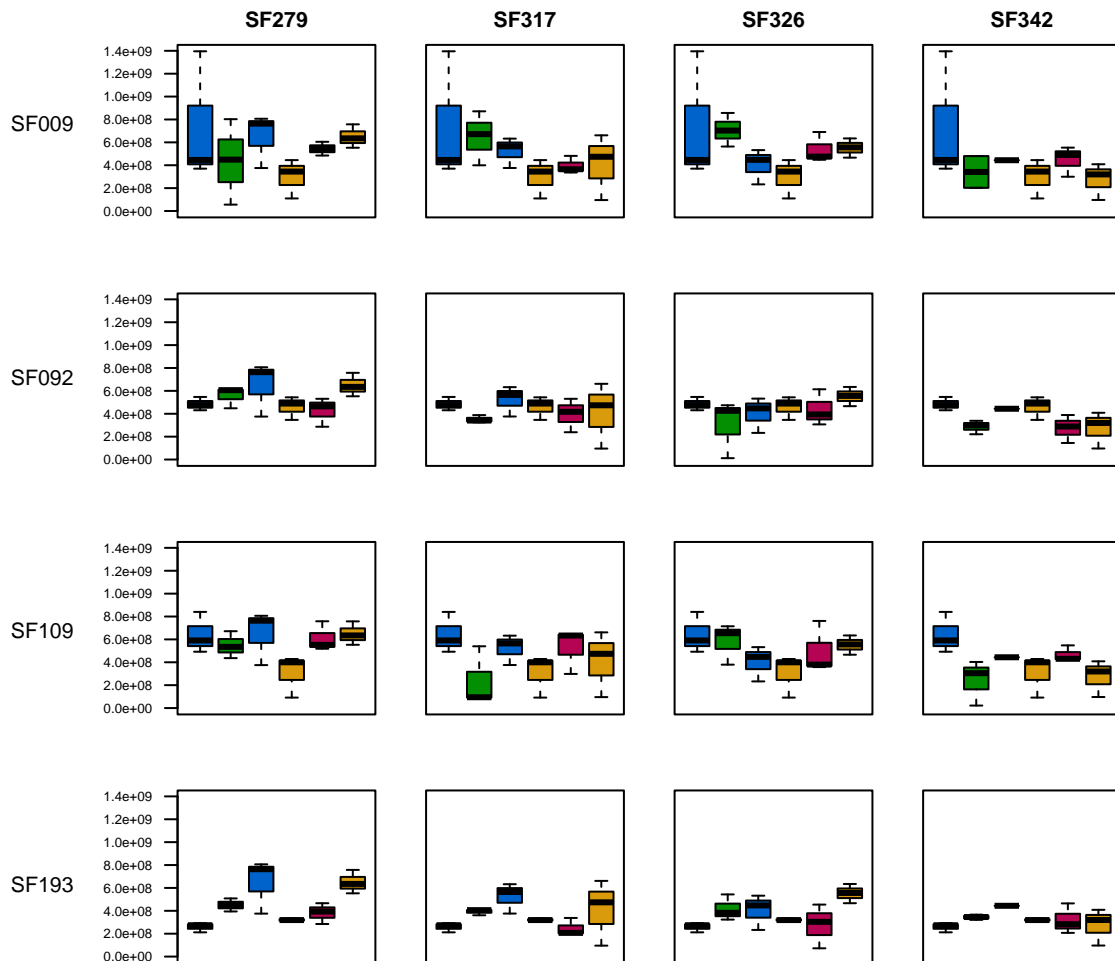

HanXRQChr02g0038551  
Uncharacterized protein, supported by  
expression data

Parents WW  
Parents WD  
Hybrids WW  
Hybrids WD

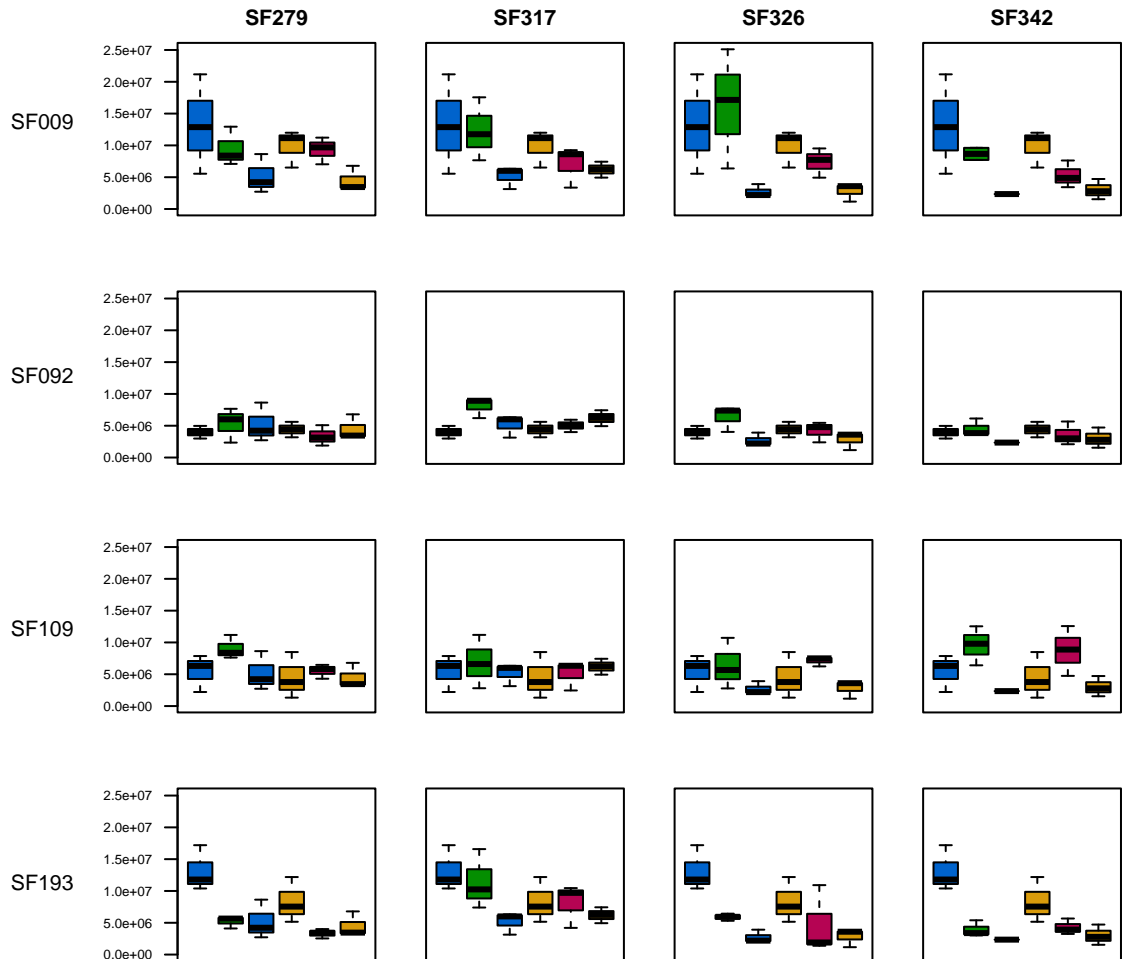

HanXRQChr16g0529741  
Putative bet v I/Major latex protein;  
START-like domain

■ Parents WW  
■ Parents WD  
■ Hybrids WW  
■ Hybrids WD

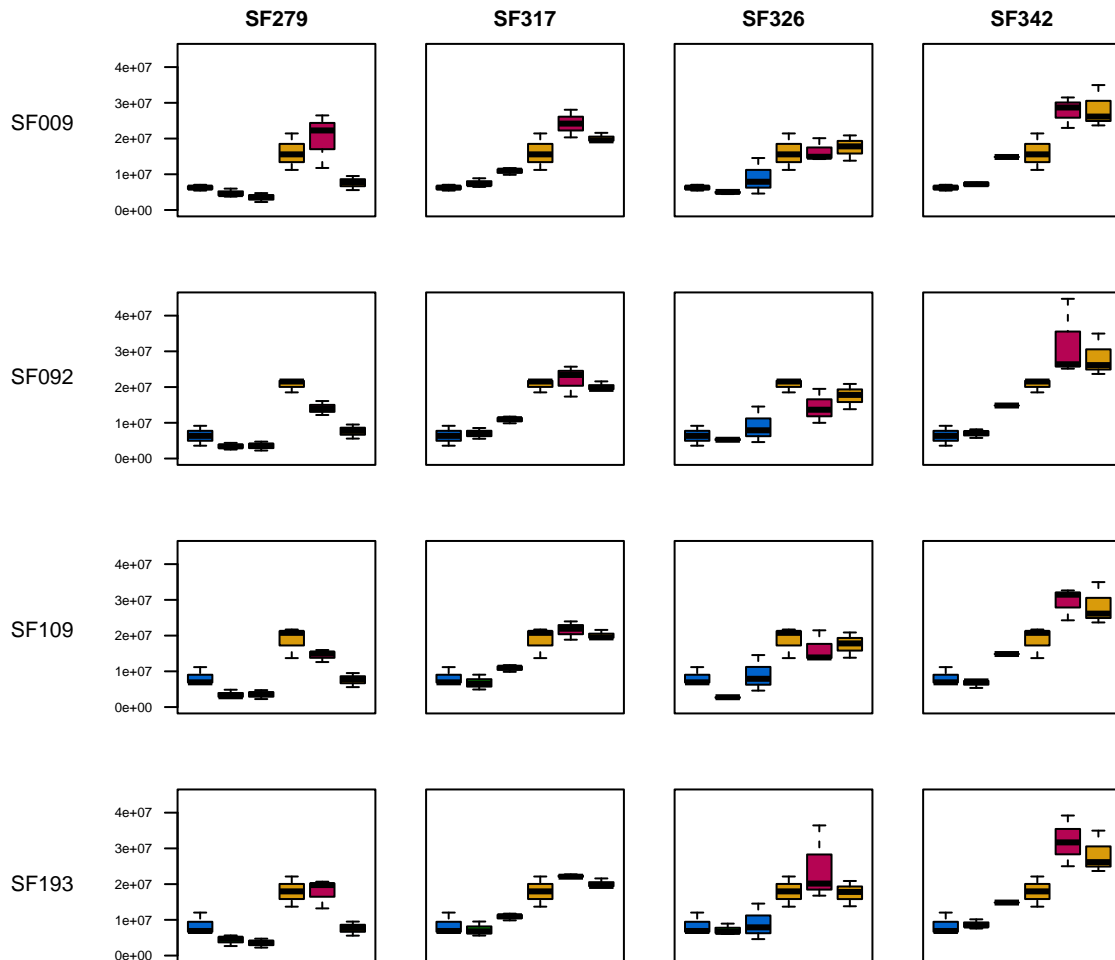

HanXRQChr09g0249391  
Probable 14-3-3 protein 10

Parents WW  
Parents WD  
Hybrids WW  
Hybrids WD

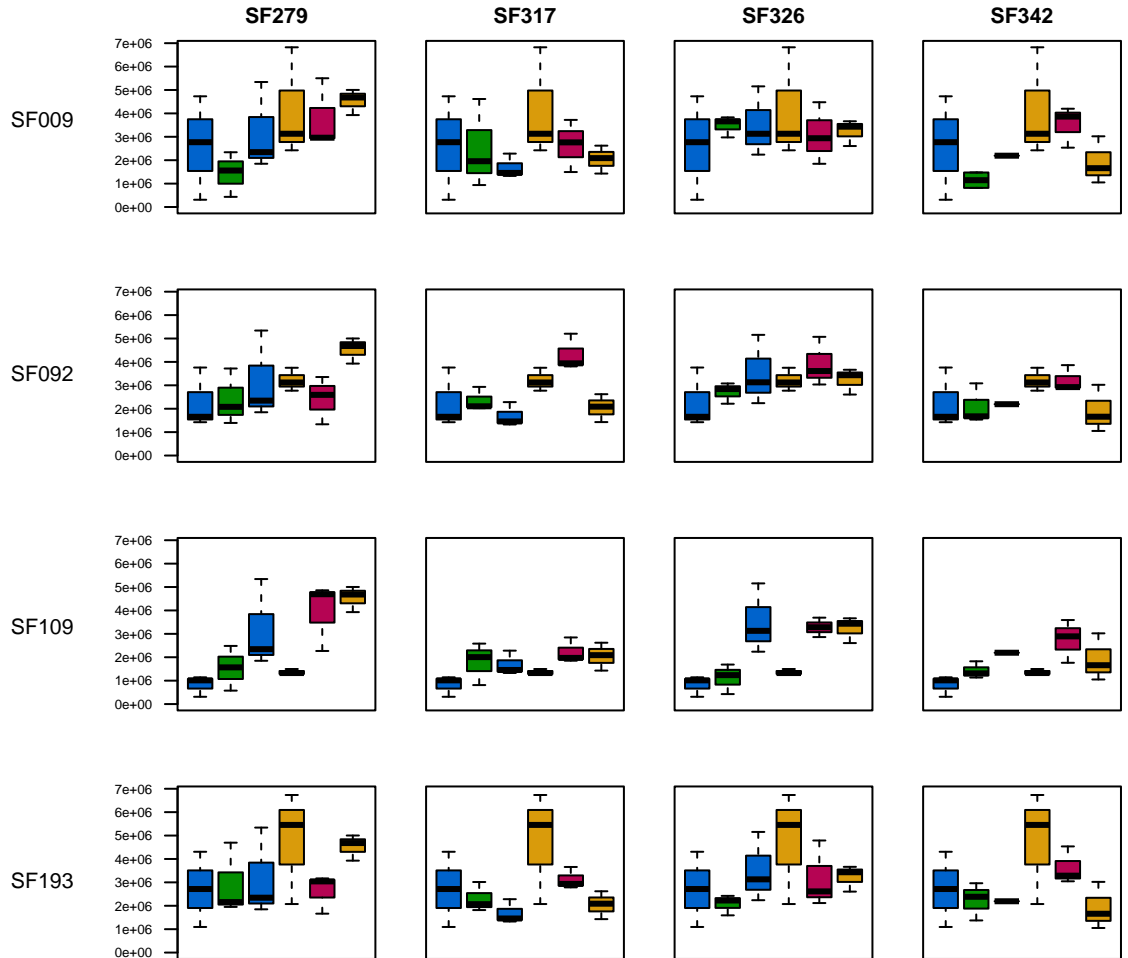

HanXRQChr05g0128921  
Probable cyclophilin 20-2

Parents WW  
Parents WD  
Hybrids WW  
Hybrids WD

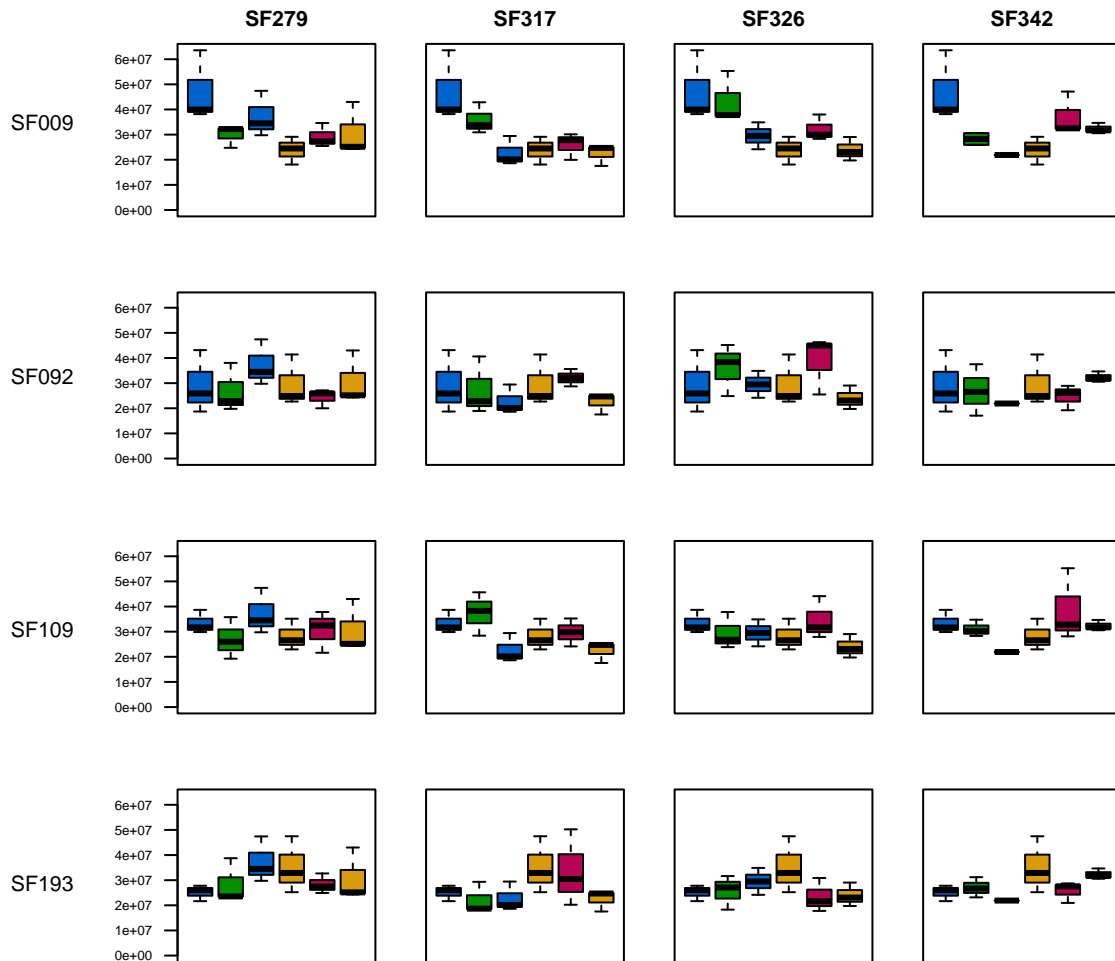

HanXRQChr01g0027621  
Probable ATPase, AAA-type, CDC48 protei

Parents WW  
Parents WD  
Hybrids WW  
Hybrids WD

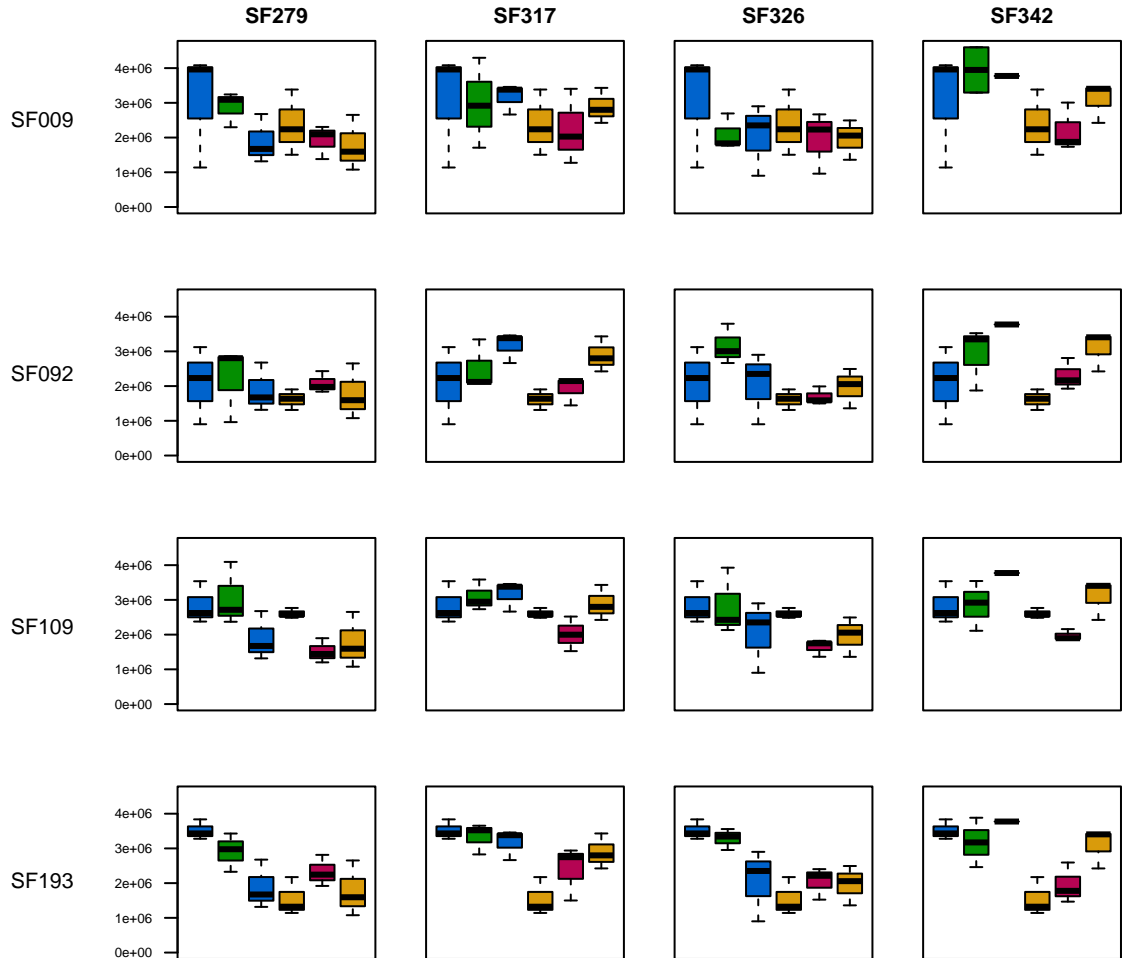

HanXRQChr04g0102931  
Probable KH domain-containing protein

Parents WW  
Parents WD  
Hybrids WW  
Hybrids WD

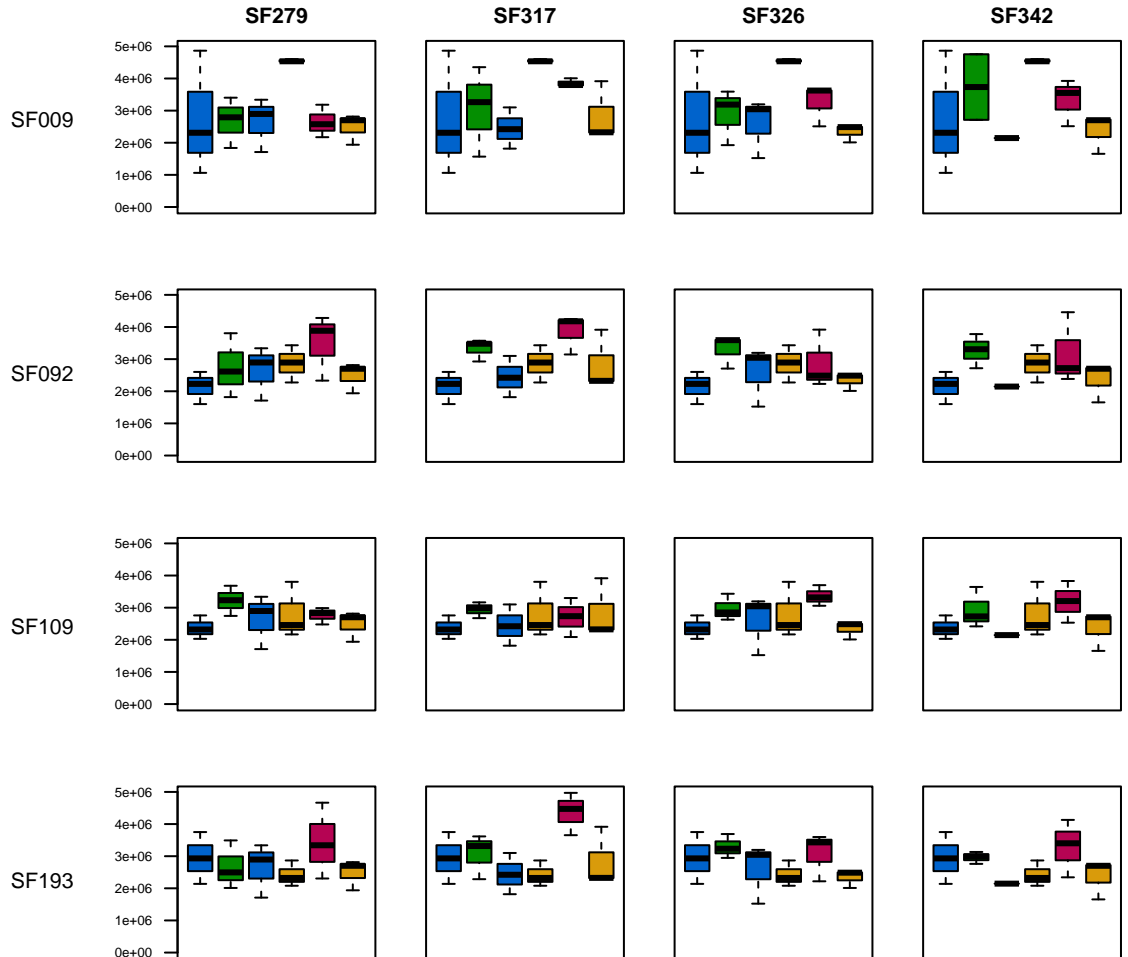

HanXRQChr15g0465731  
Putative chloroplast protein import  
component Toc86/159; Translocase of chlor

Parents WW  
Parents WD  
Hybrids WW  
Hybrids WD

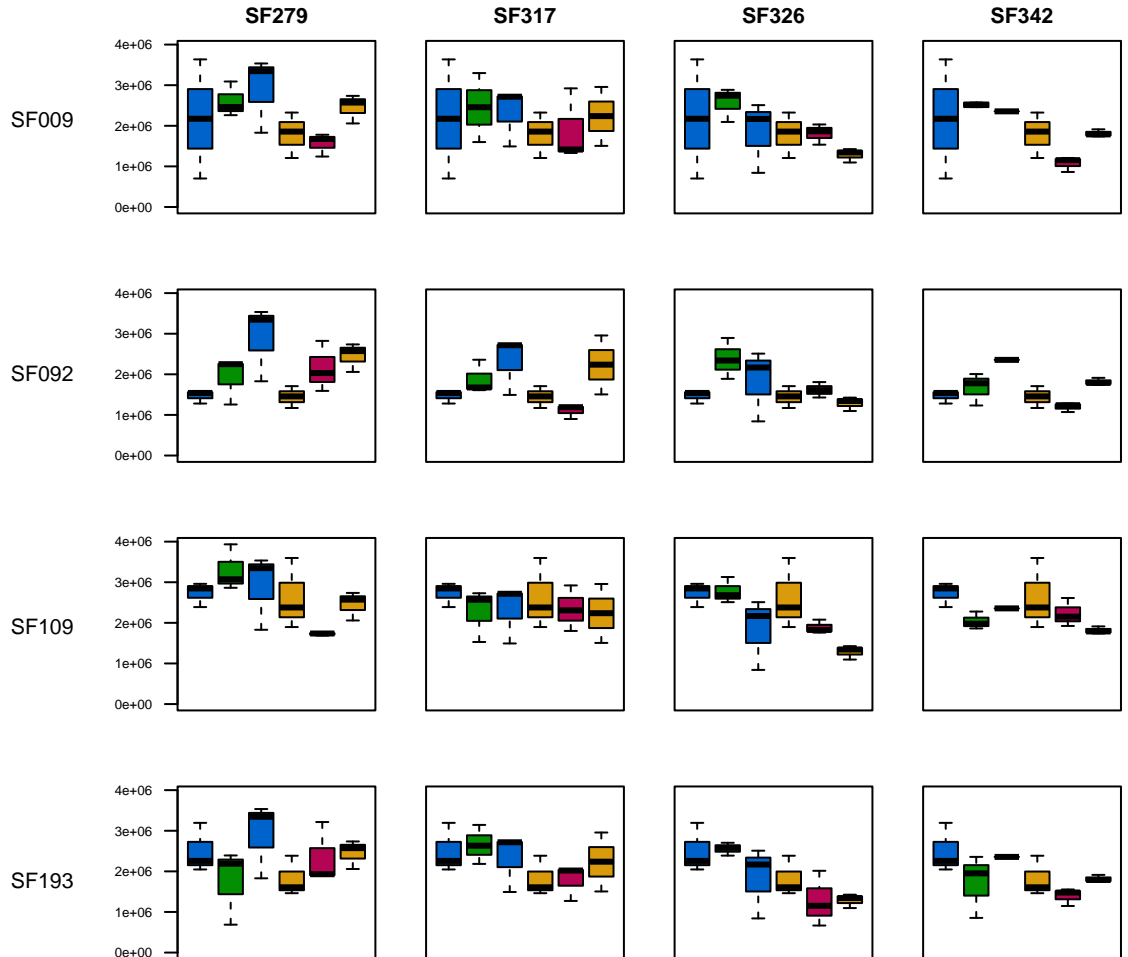



HanXRQChr17g0543441  
Putative pyruvate kinase; Pyruvate  
kinase, barrel

Parents WW  
Parents WD  
Hybrids WW  
Hybrids WD

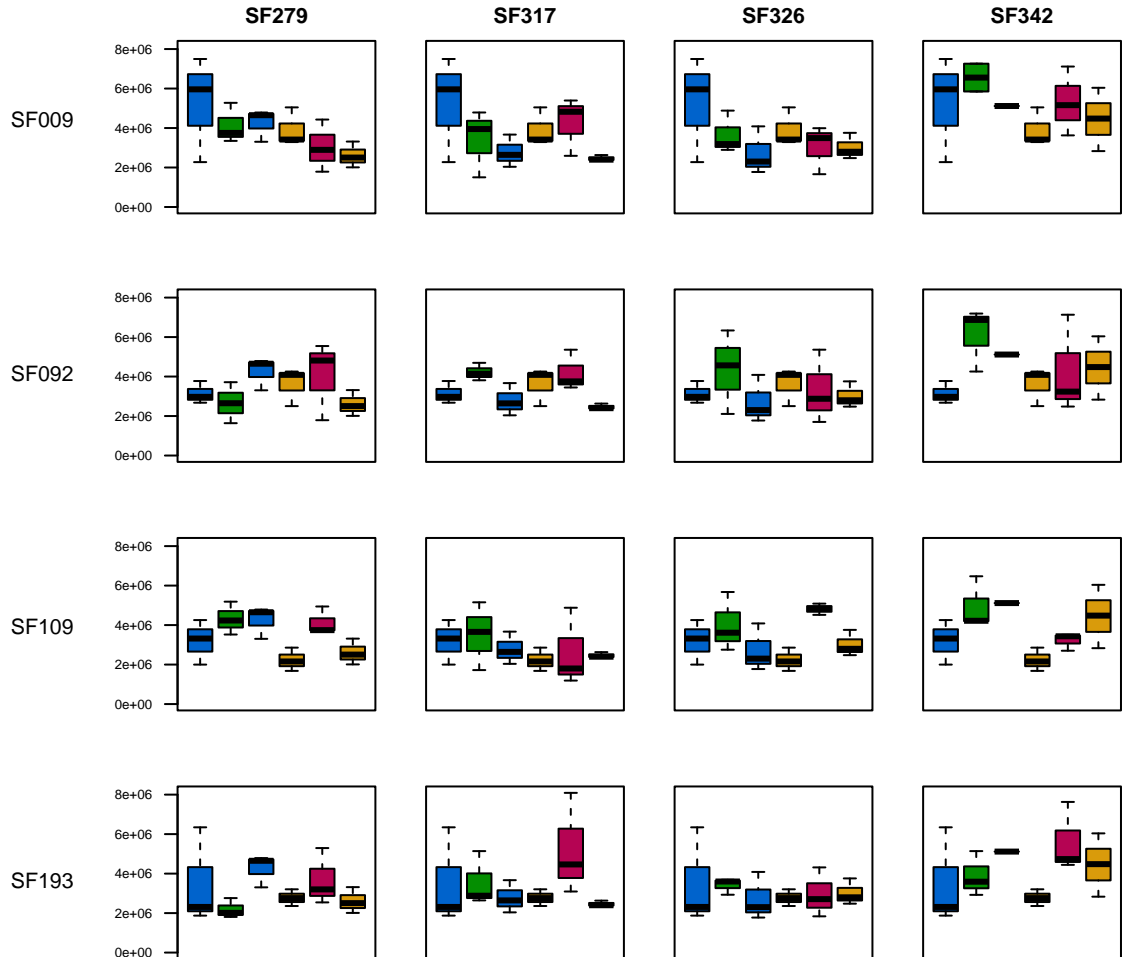

HanXRQChr02g0048911  
Probable nucleic acid-binding,  
OB-fold-like protein

Parents WW  
Parents WD  
Hybrids WW  
Hybrids WD

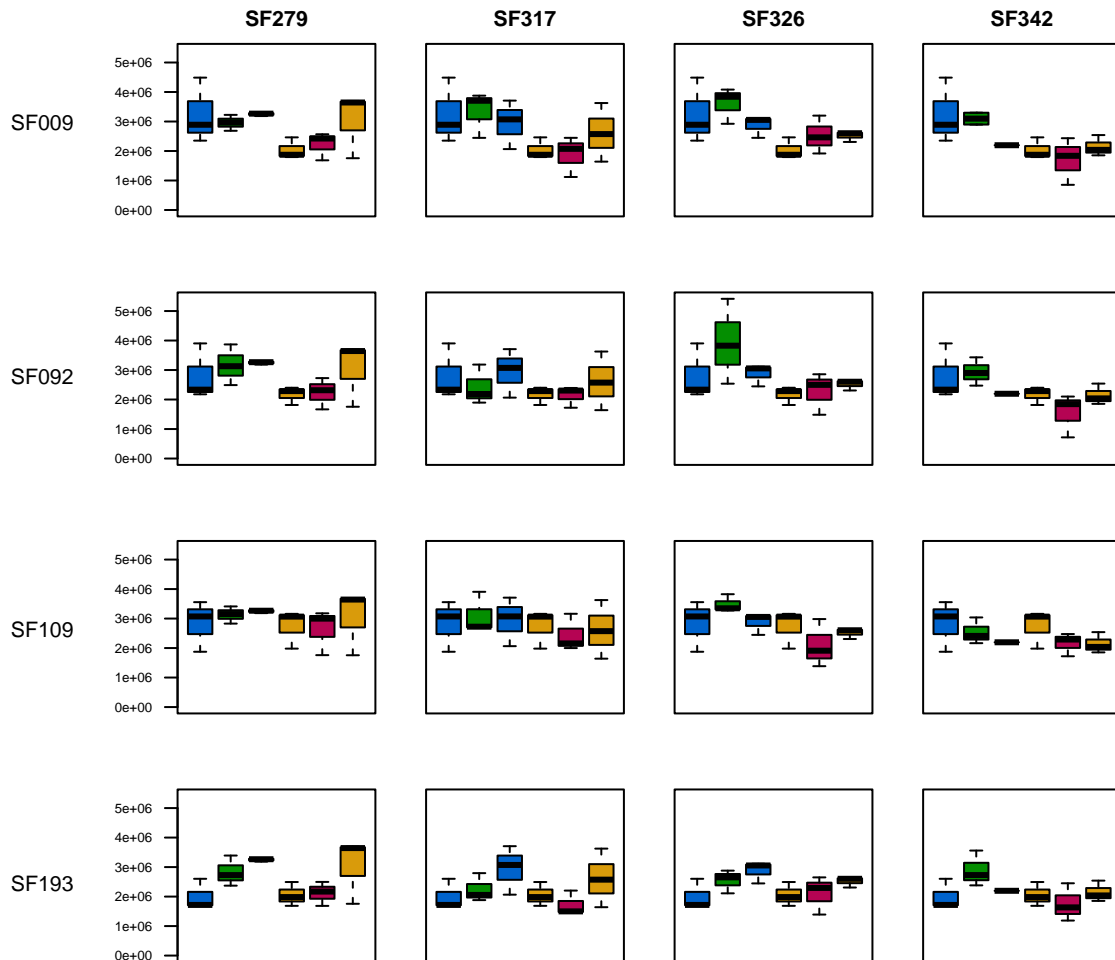

HanXRQChr17g0546201  
Putative glycerophosphoryl diester  
phosphodiesterase

Parents WW  
Parents WD  
Hybrids WW  
Hybrids WD

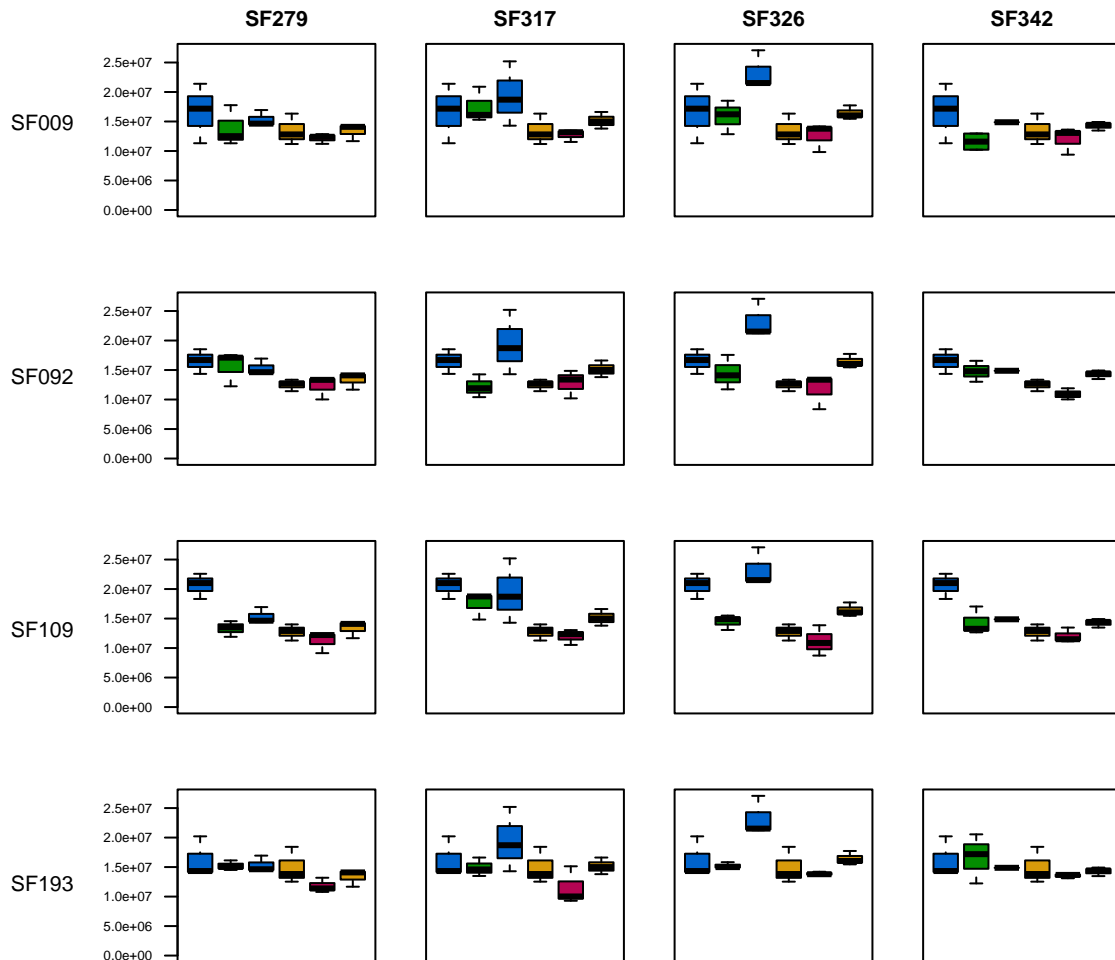

HanXRQChr10g0294381  
 Probable cysteine synthase EC=2.5.1.51  
 EC=4.2.1.50 EC=2.5.1.52

Parents WW  
 Parents WD  
 Hybrids WW  
 Hybrids WD

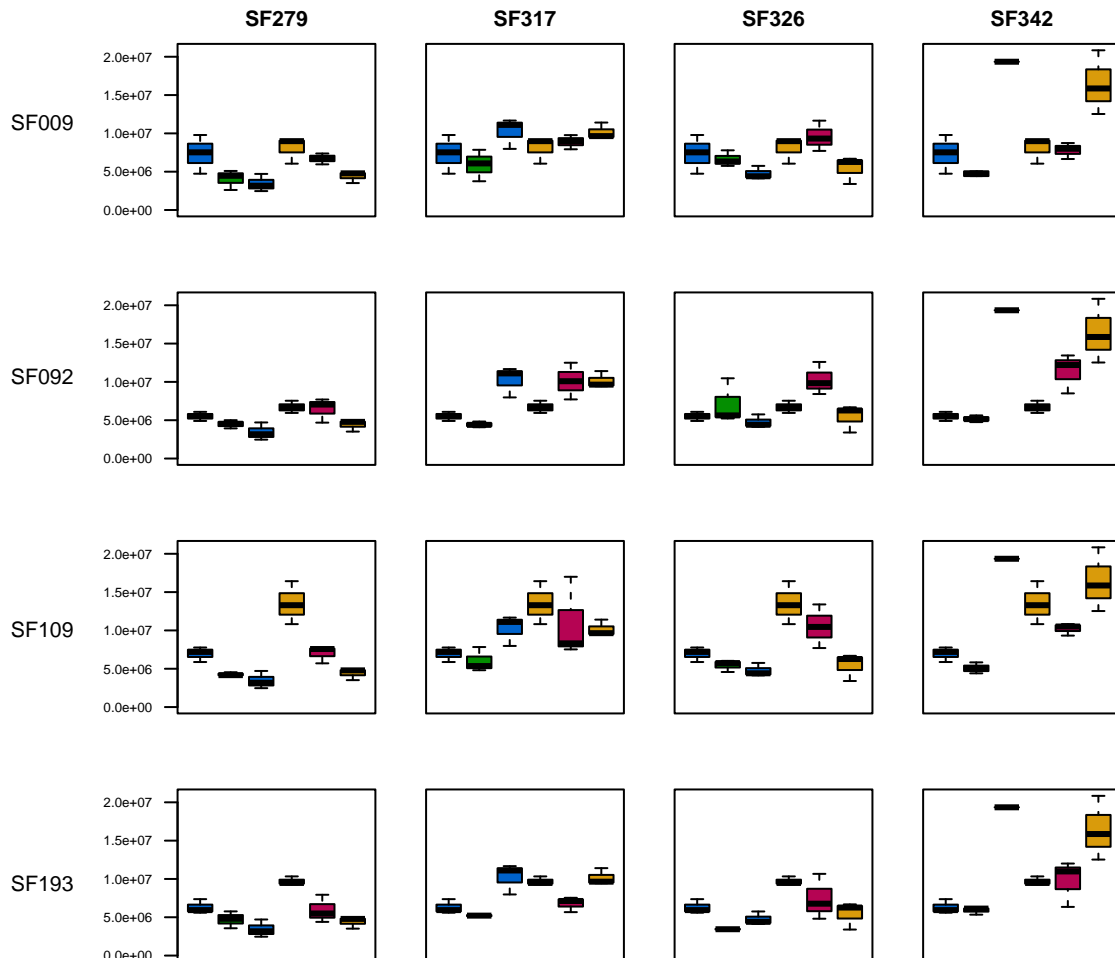

HanXRQChr16g0508431  
 Probable oxidoreductases, acting on  
 NADH or NADPH, quinone or similar comp

Parents WW  
 Parents WD  
 Hybrids WW  
 Hybrids WD

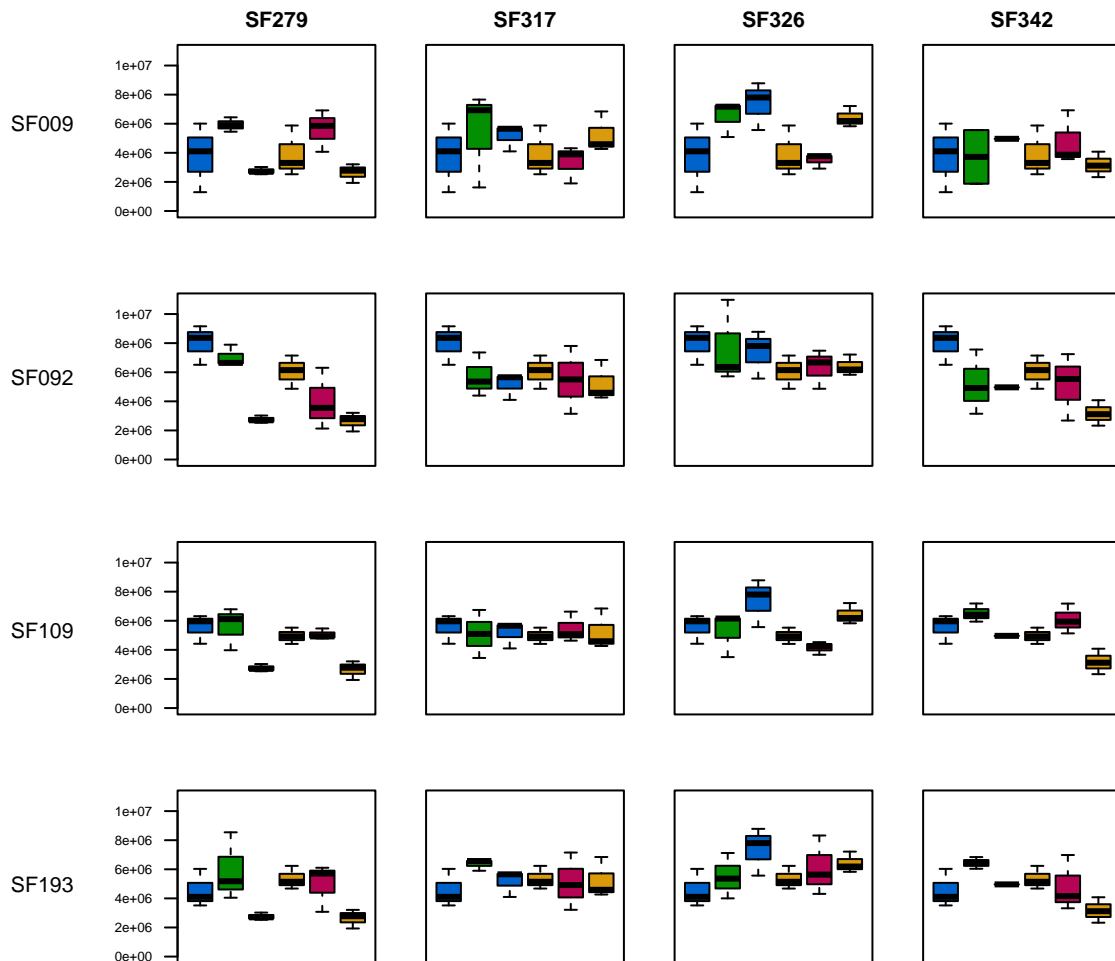

HanXRQChr01g0017591  
Probable late embryogenesis abundant  
protein, group 2

Parents WW  
Parents WD  
Hybrids WW  
Hybrids WD

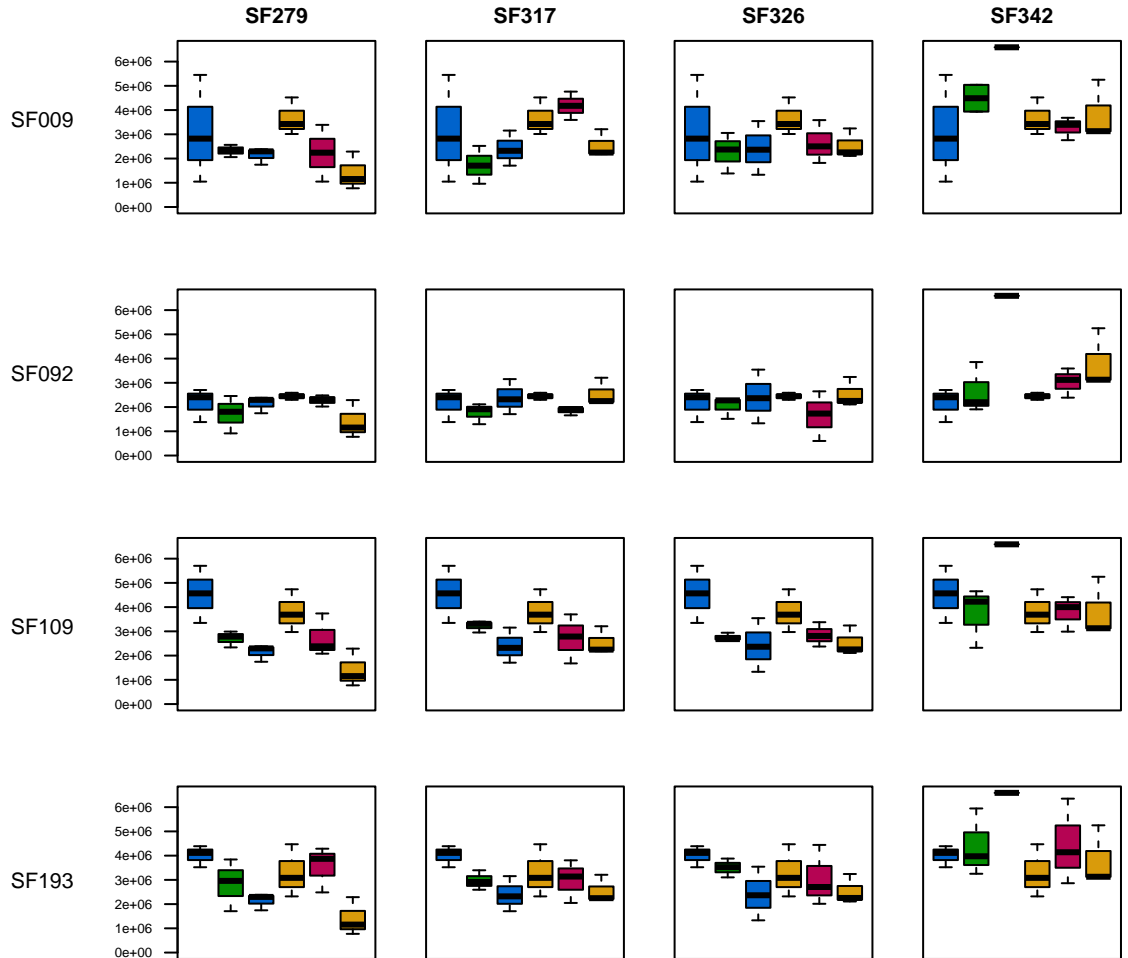

HanXRQChr13g0407021  
Probable thioredoxin M2, chloroplastic

Parents WW  
Parents WD  
Hybrids WW  
Hybrids WD

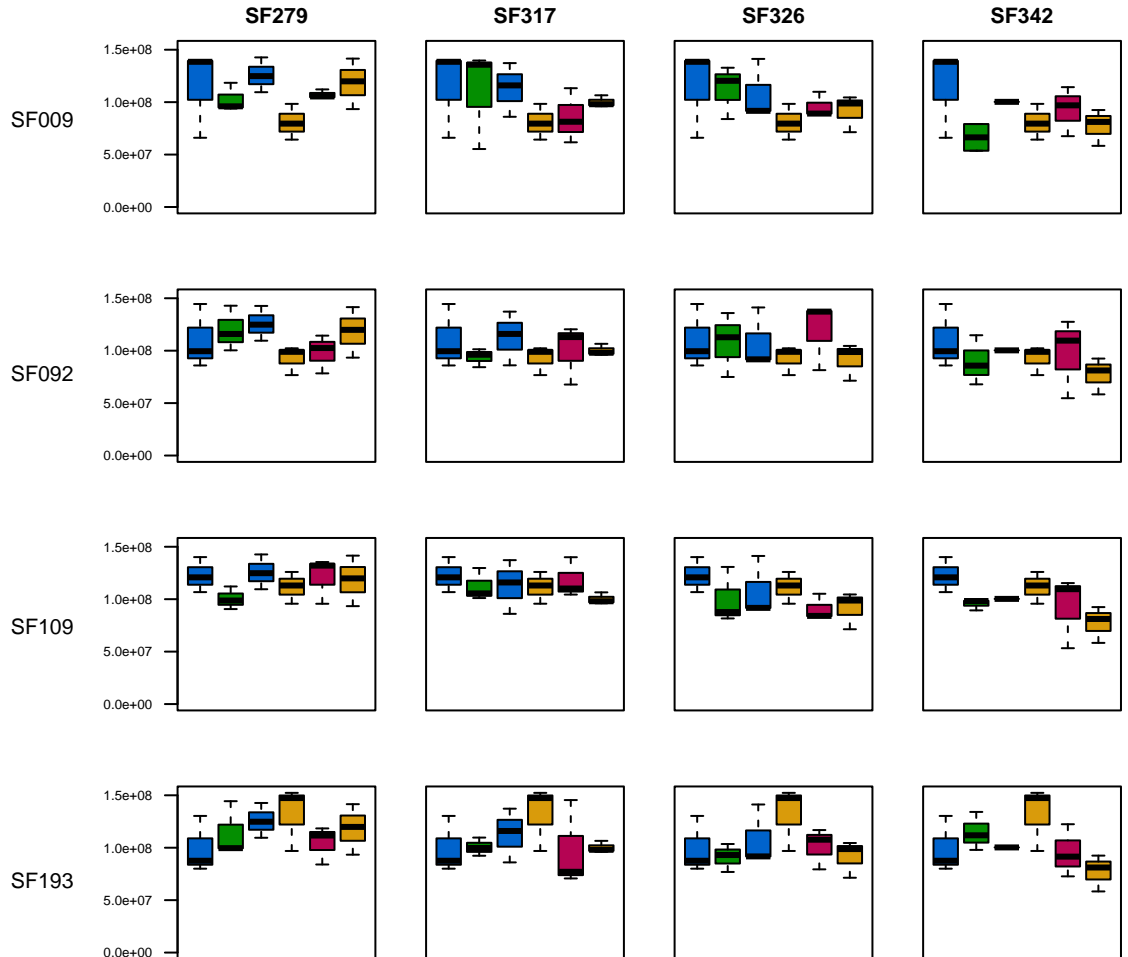

HanXRQChr08g0232581  
Probable  
phosphoribosylformylglycinamide synthas

Parents WW  
Parents WD  
Hybrids WW  
Hybrids WD

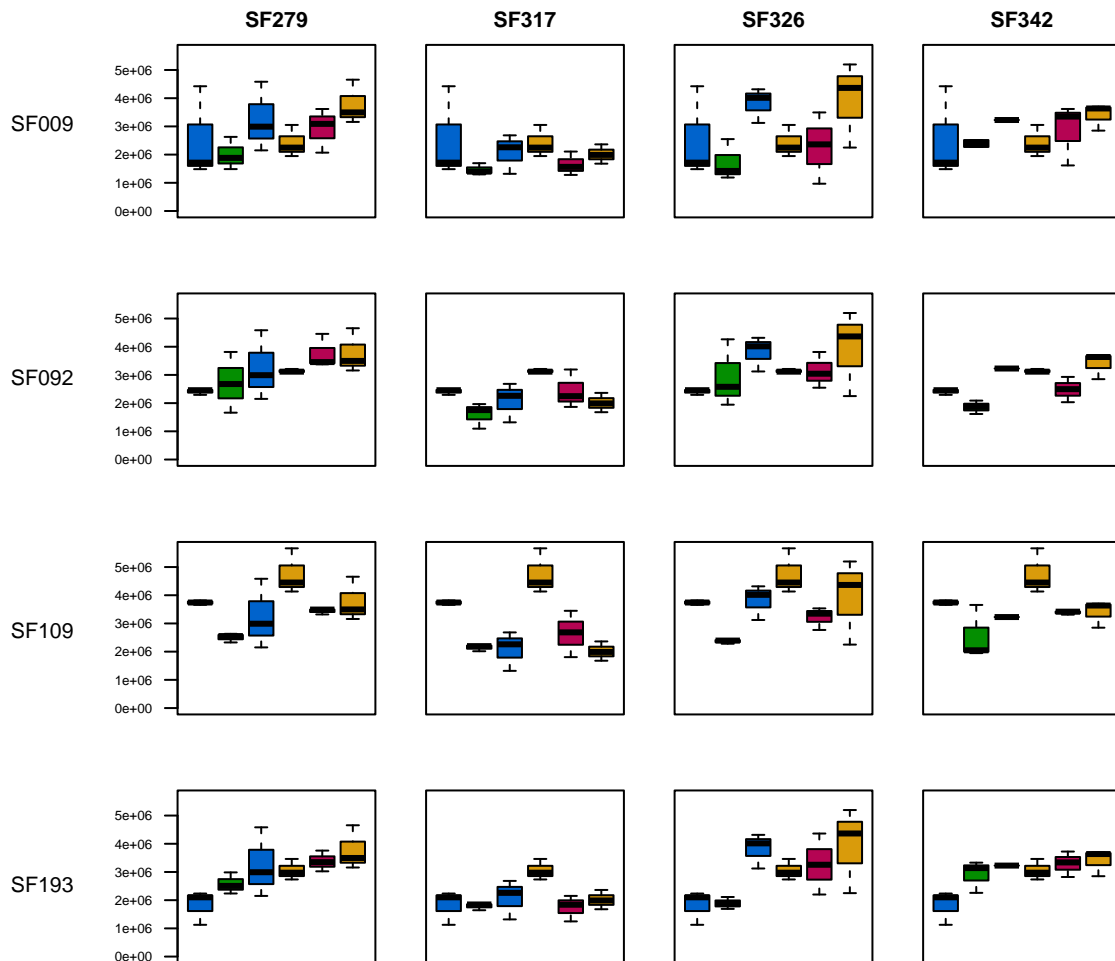



HanXRQChr10g0307591  
Putative translation initiation factor 3

- Parents WW
- Parents WD
- Hybrids WW
- Hybrids WD

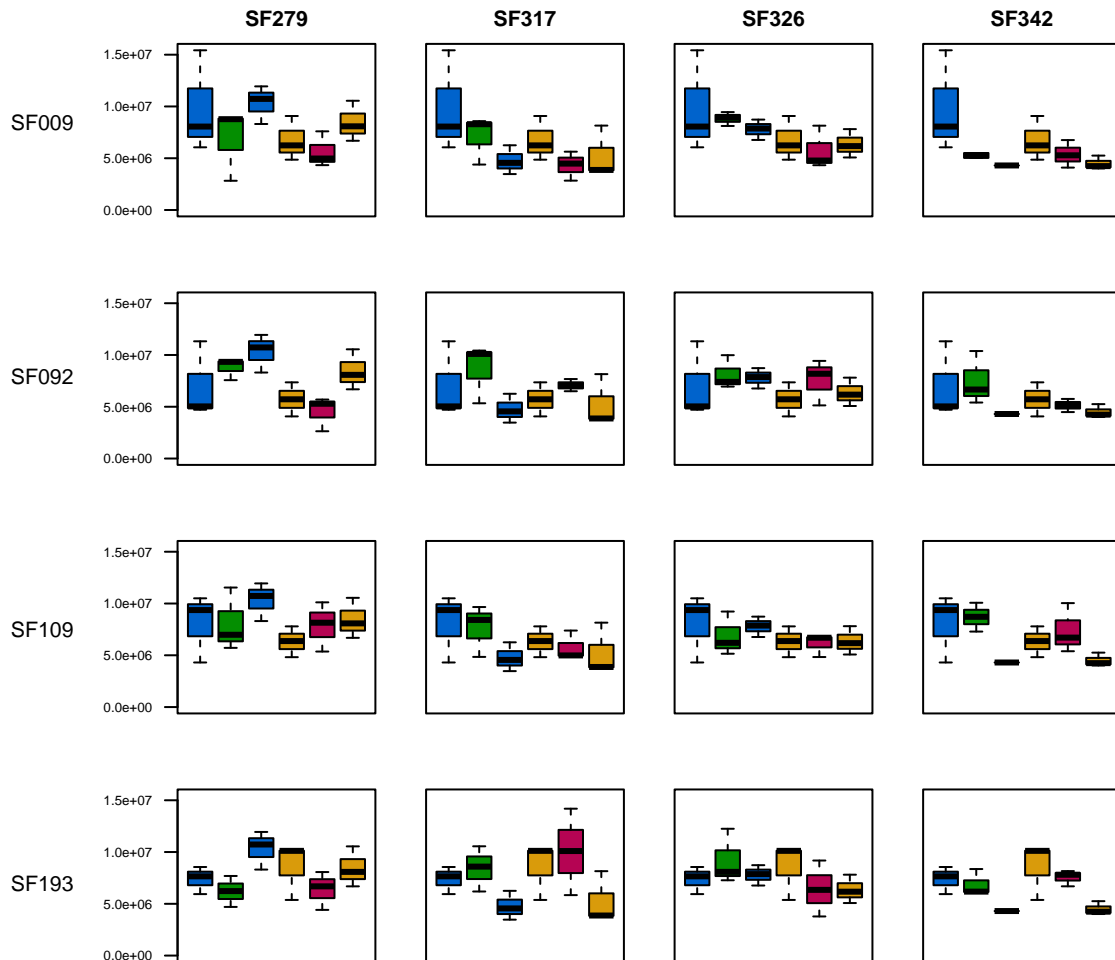

HanXRQChr10g0312621  
Putative germin

- Parents WW
- Parents WD
- Hybrids WW
- Hybrids WD

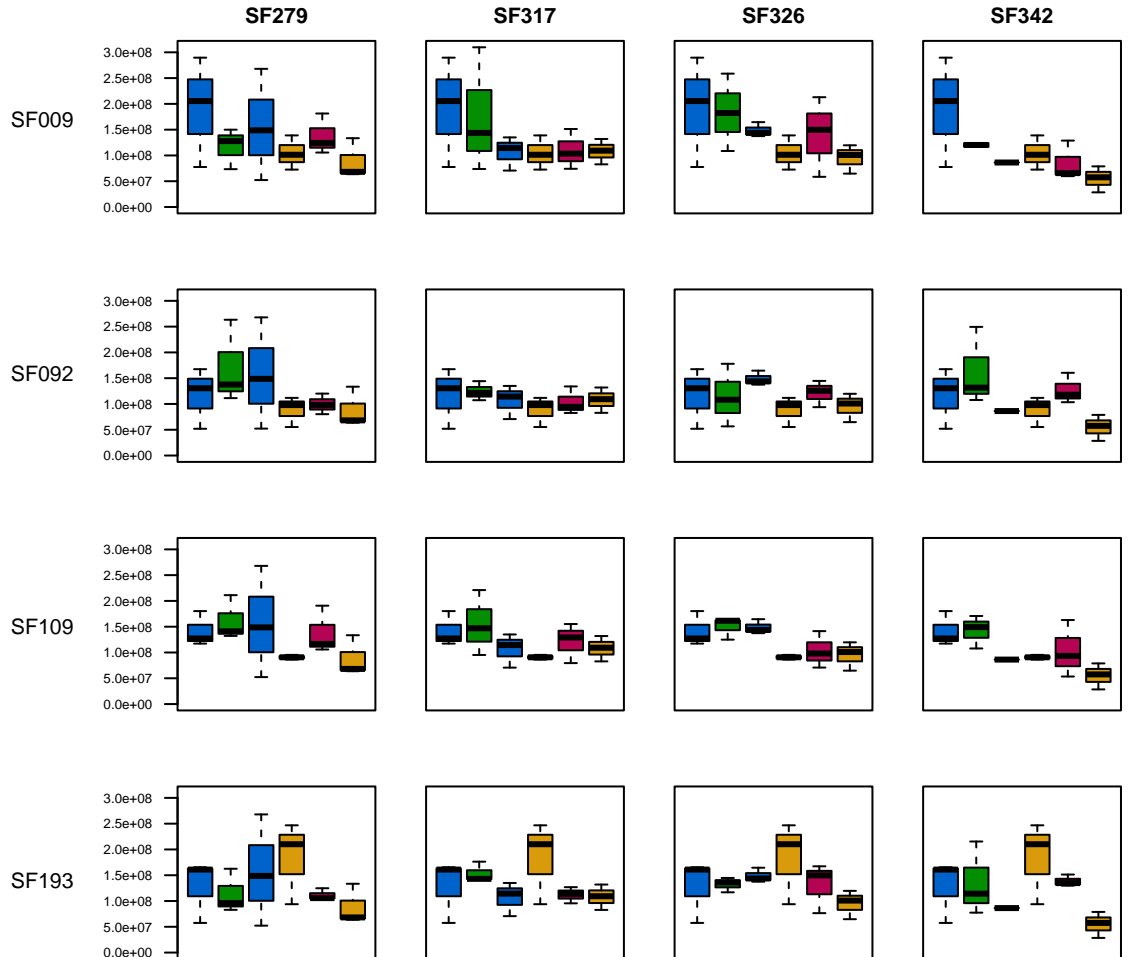

HanXRQChr14g0447051  
Probable phosphoenolpyruvate  
carboxykinase 2

Parents WW  
Parents WD  
Hybrids WW  
Hybrids WD

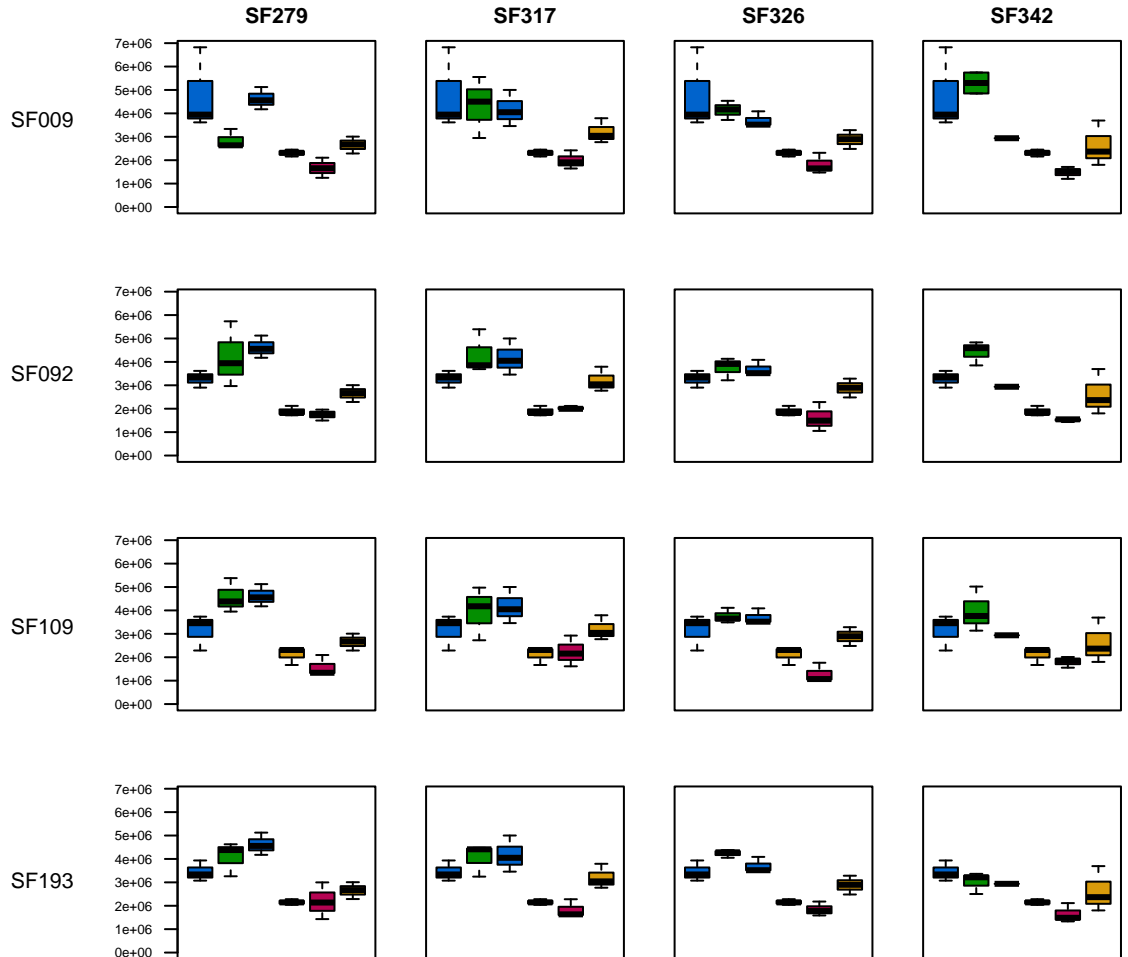

HanXRQChr12g035551  
Putative aspartate/other  
aminotransferase; Pyridoxal phosphate-dep

Parents WW  
Parents WD  
Hybrids WW  
Hybrids WD

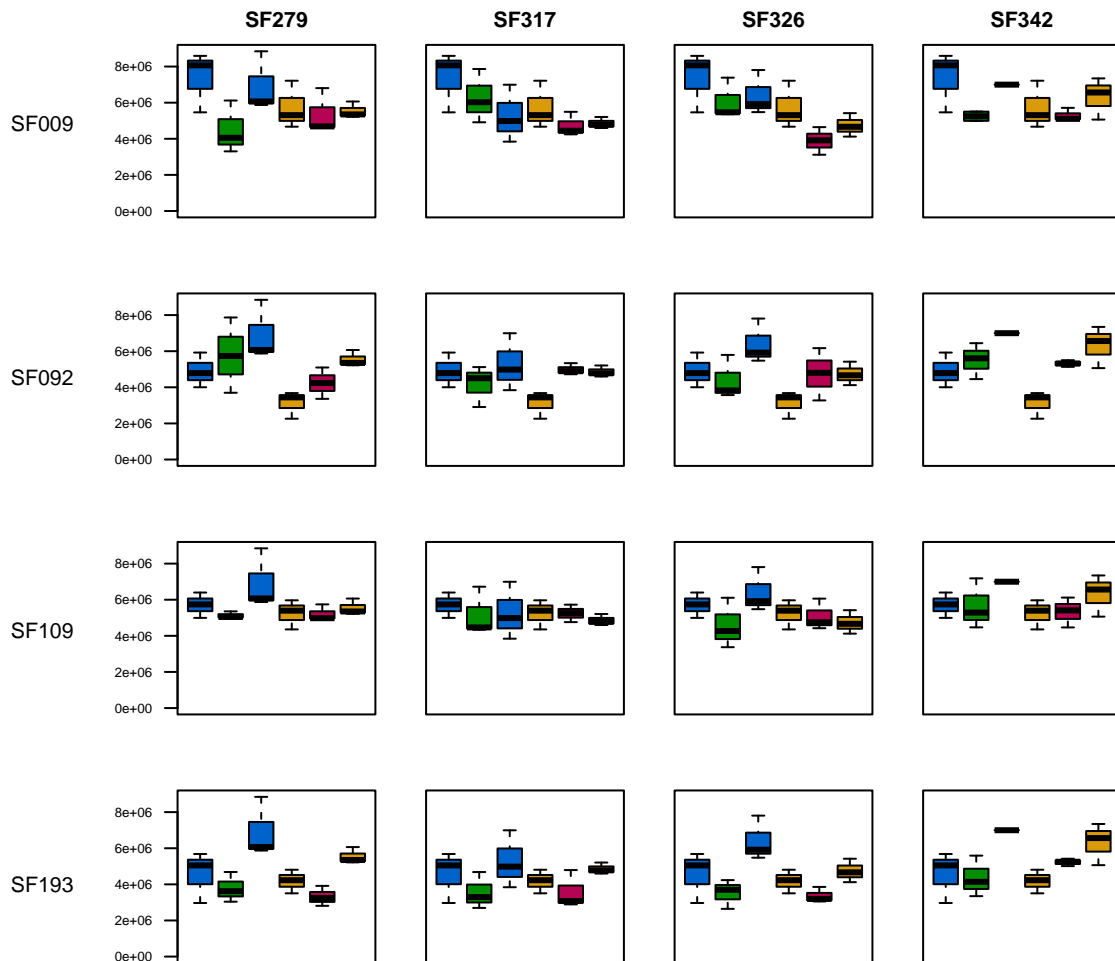

HanXRQChr02g0053301  
Probable immunoglobulin E-set  
superfamily protein

Parents WW  
Parents WD  
Hybrids WW  
Hybrids WD

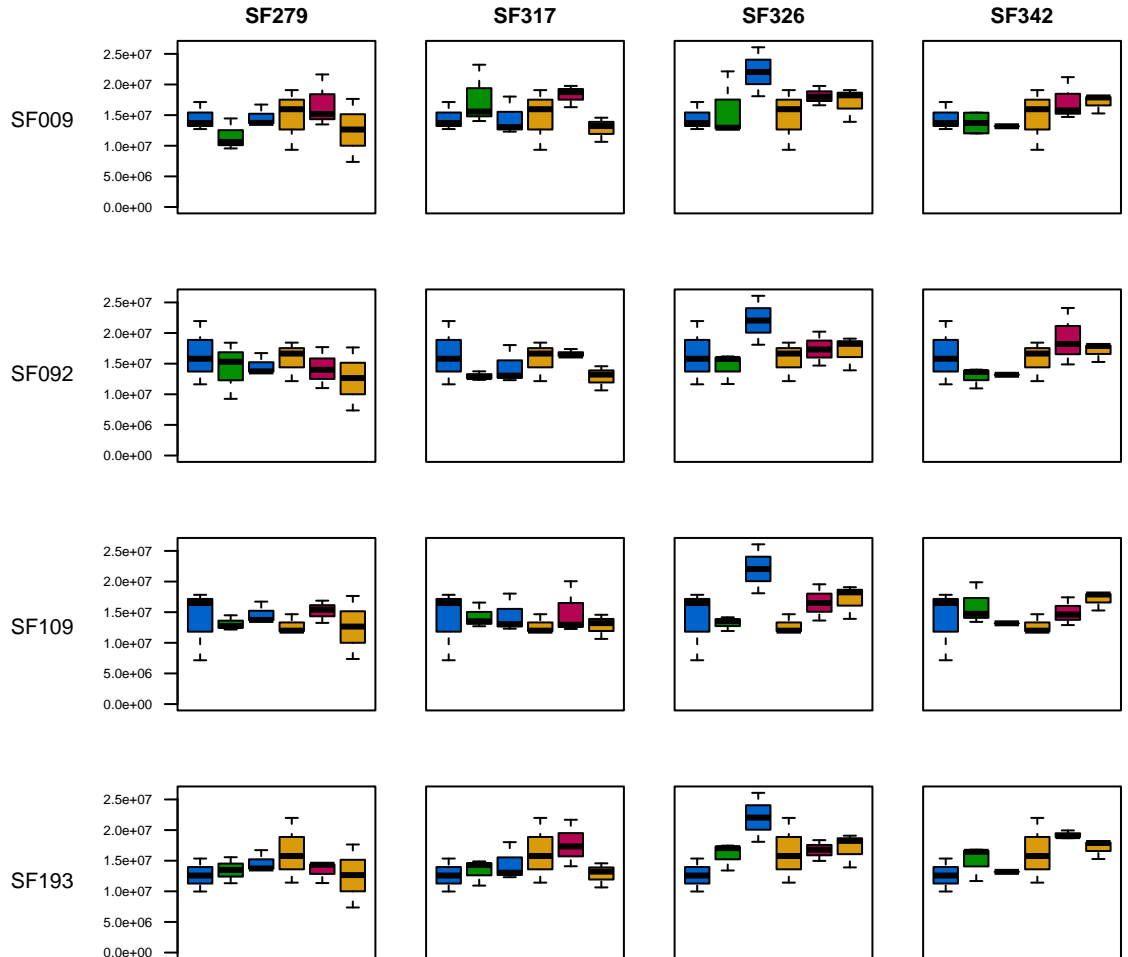

HanXRQChr08g0230211  
Probable 26S protease regulatory  
subunit 6B homolog

Parents WW  
Parents WD  
Hybrids WW  
Hybrids WD

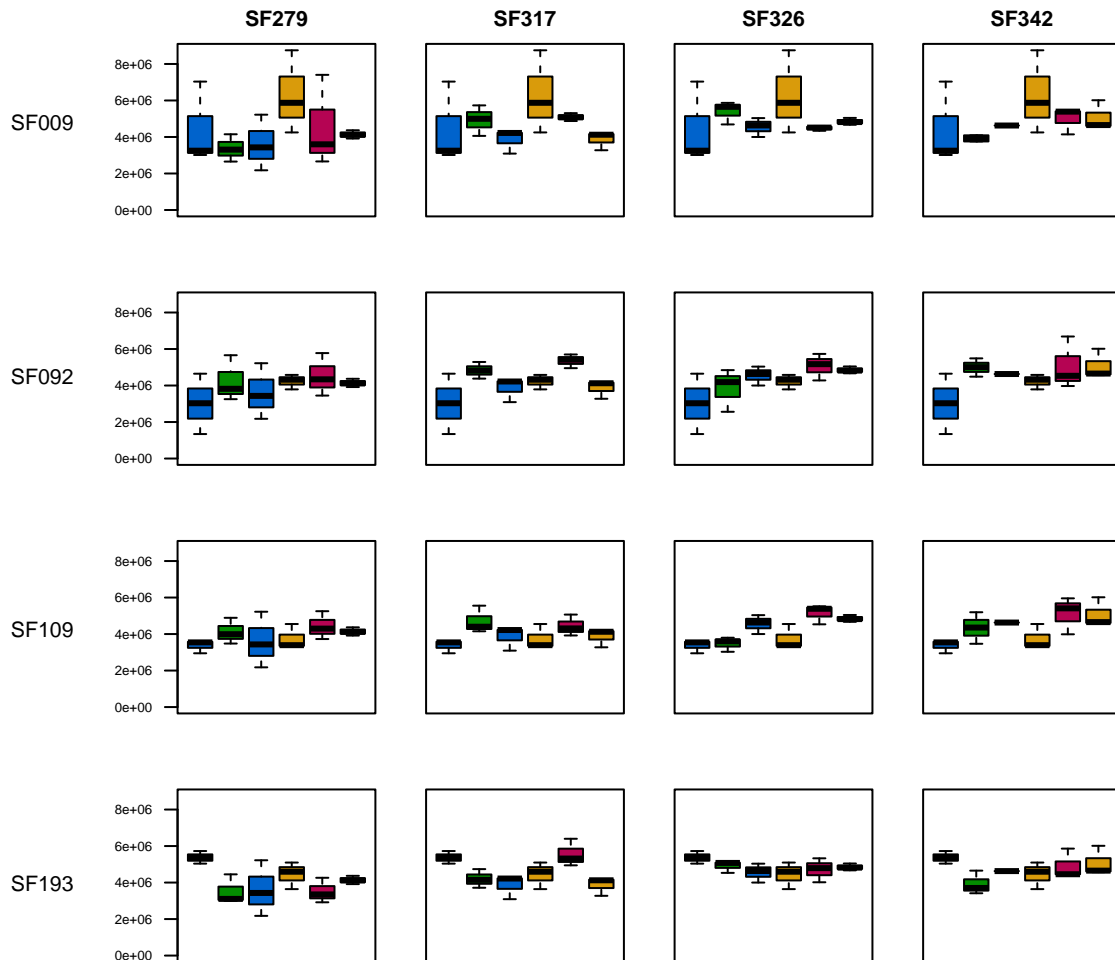

HanXRQChr06g0171511  
Probable ycf48-like protein

Parents WW  
Parents WD  
Hybrids WW  
Hybrids WD

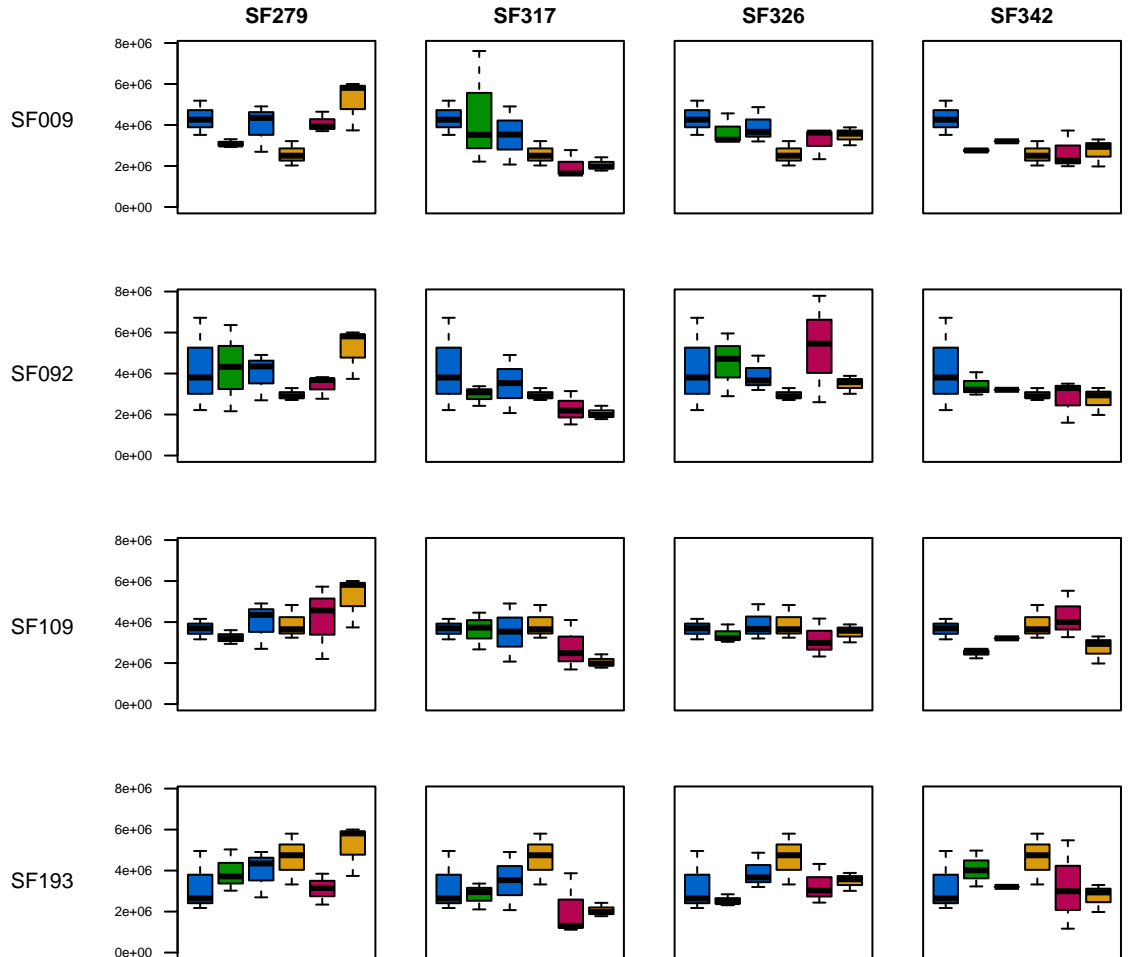

HanXRQChr01g0013711  
Probable glyoxylate reductase 1

Parents WW  
Parents WD  
Hybrids WW  
Hybrids WD

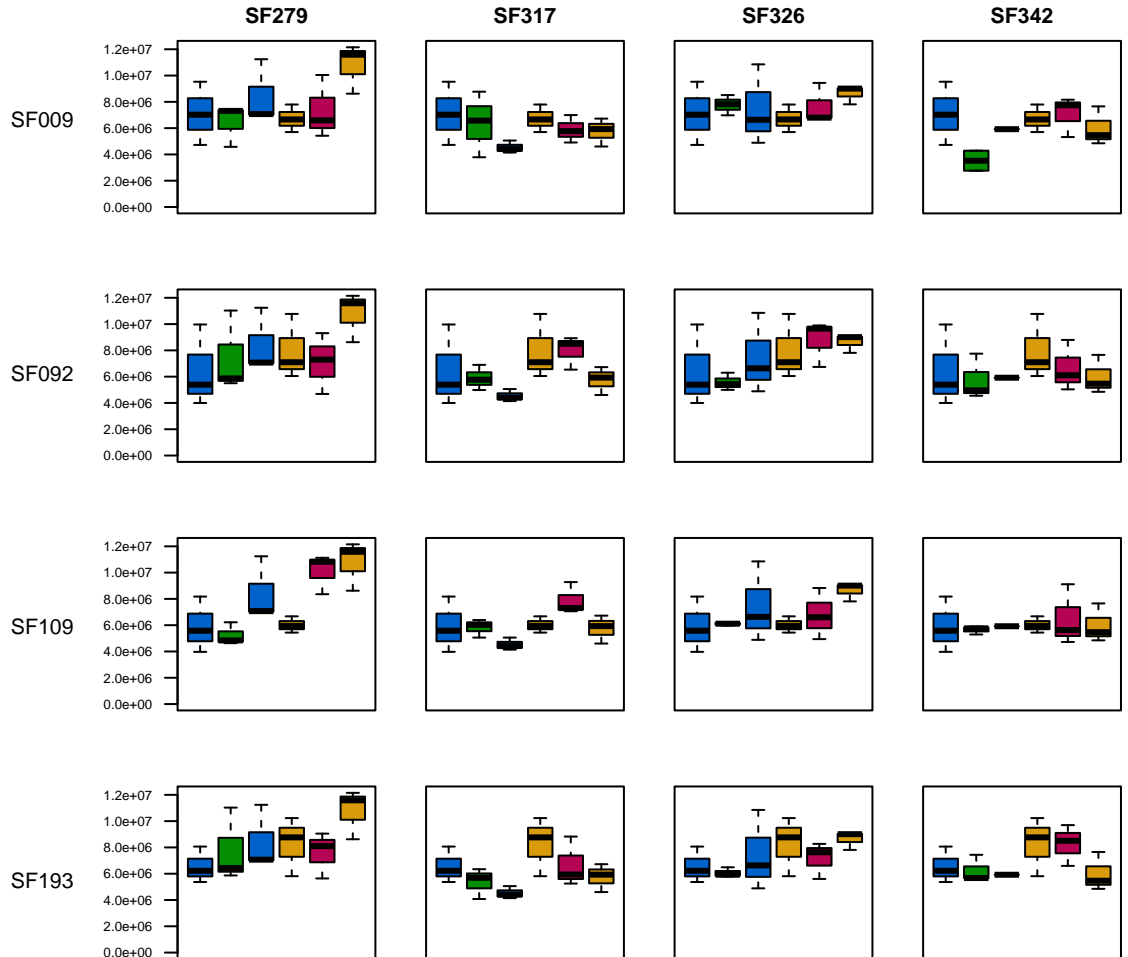



HanXRQChr03g0087601  
Probable guanosine nucleotide  
diphosphate dissociation inhibitor 1

Parents WW  
Parents WD  
Hybrids WW  
Hybrids WD

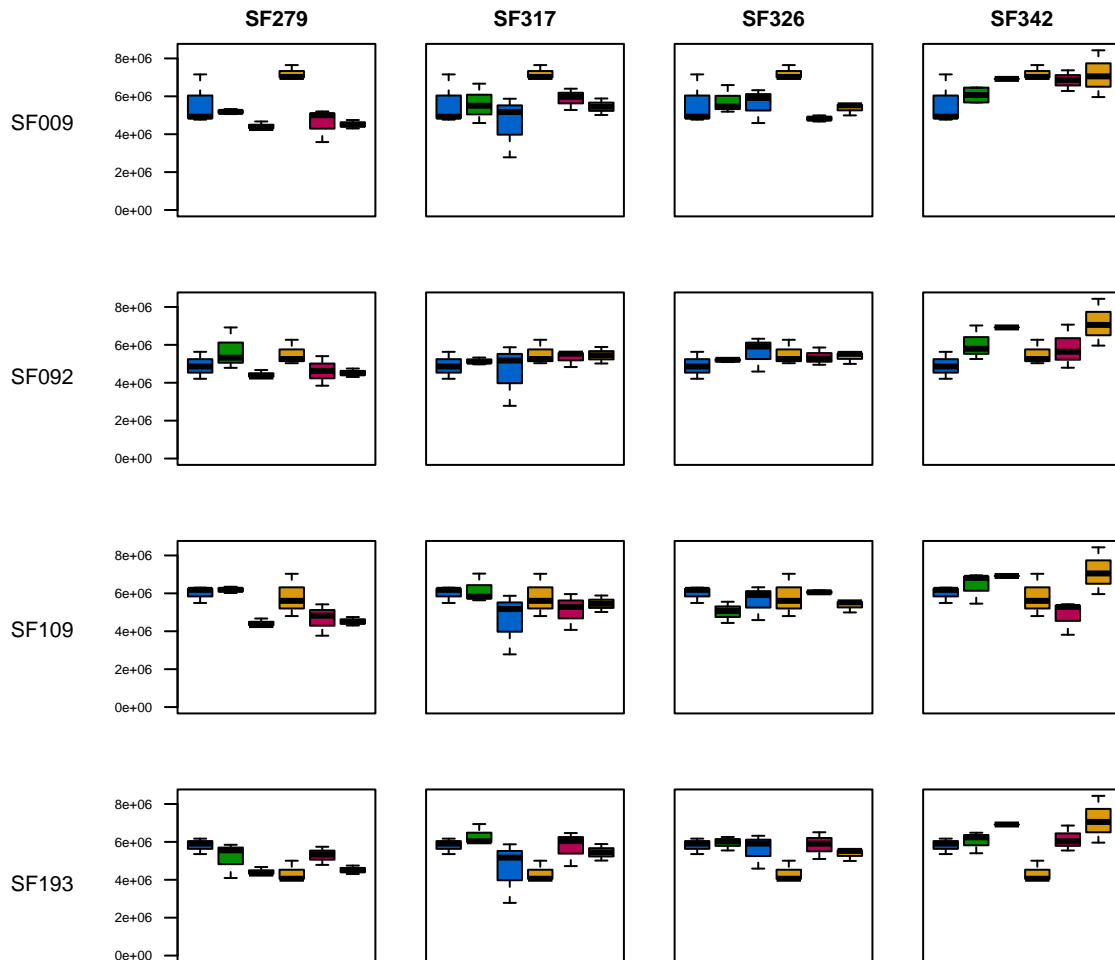

HanXRQChr06g0181801  
Putative germin

Parents WW  
Parents WD  
Hybrids WW  
Hybrids WD

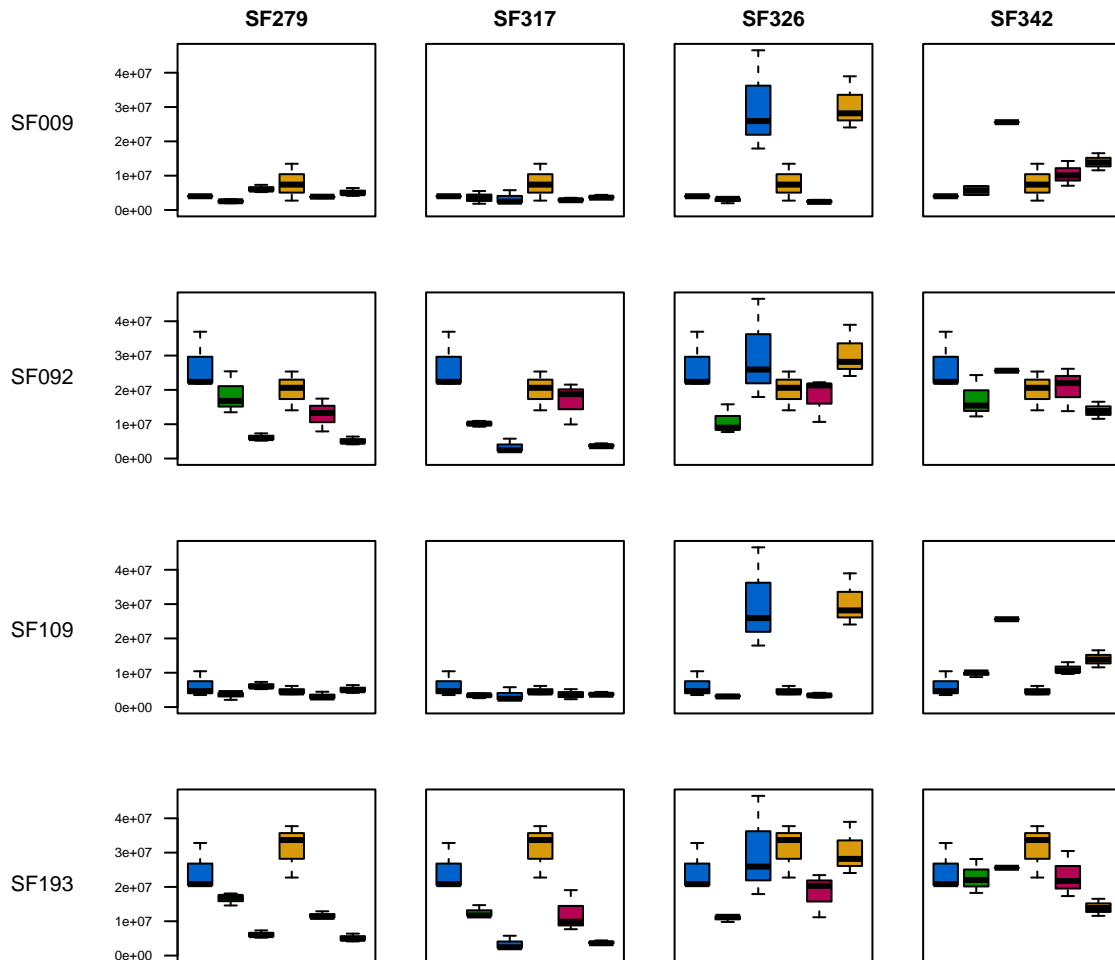

HanXRQChr15g0484471  
Uncharacterized protein, supported by  
expression data

Parents WW  
Parents WD  
Hybrids WW  
Hybrids WD

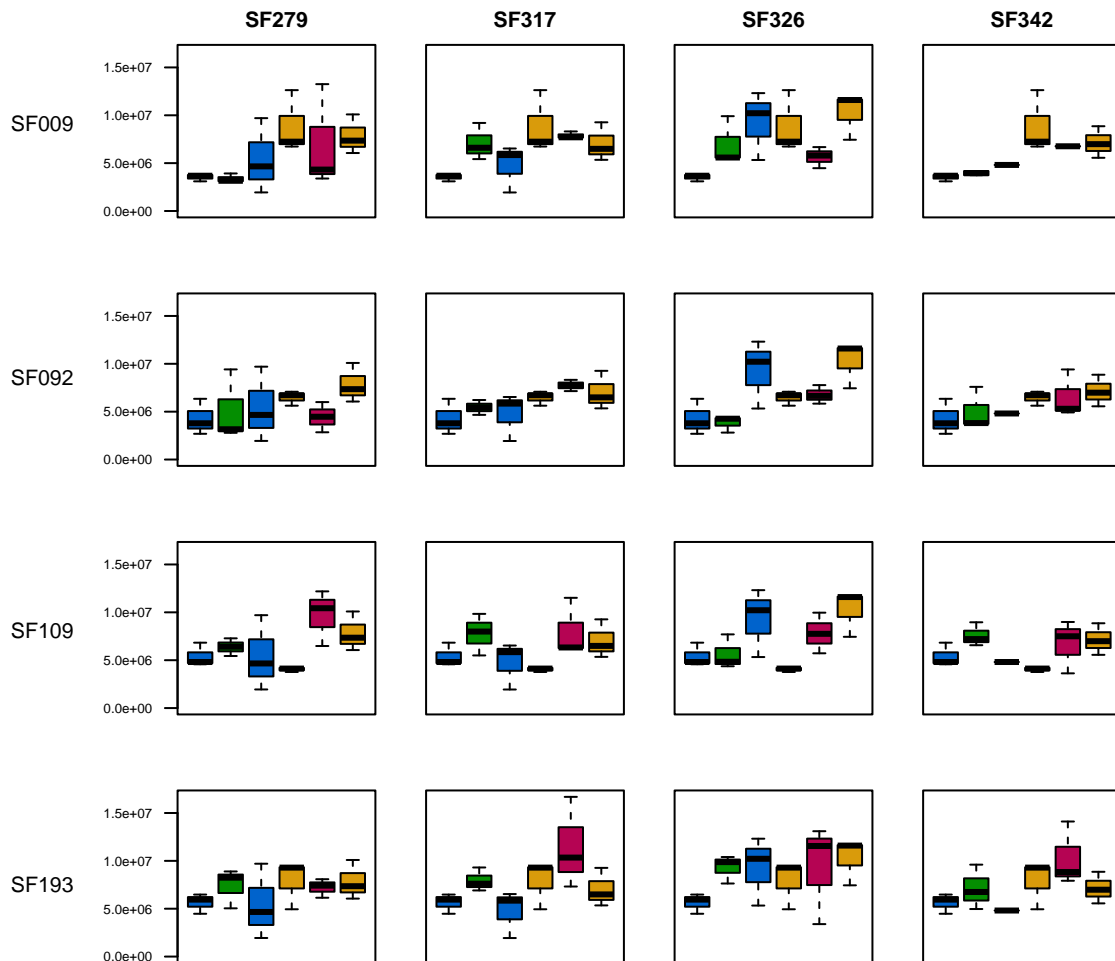

HanXRQChr15g0487501  
Probable  
dolichyl–diphosphooligosaccharide–protein

Parents WW  
Parents WD  
Hybrids WW  
Hybrids WD

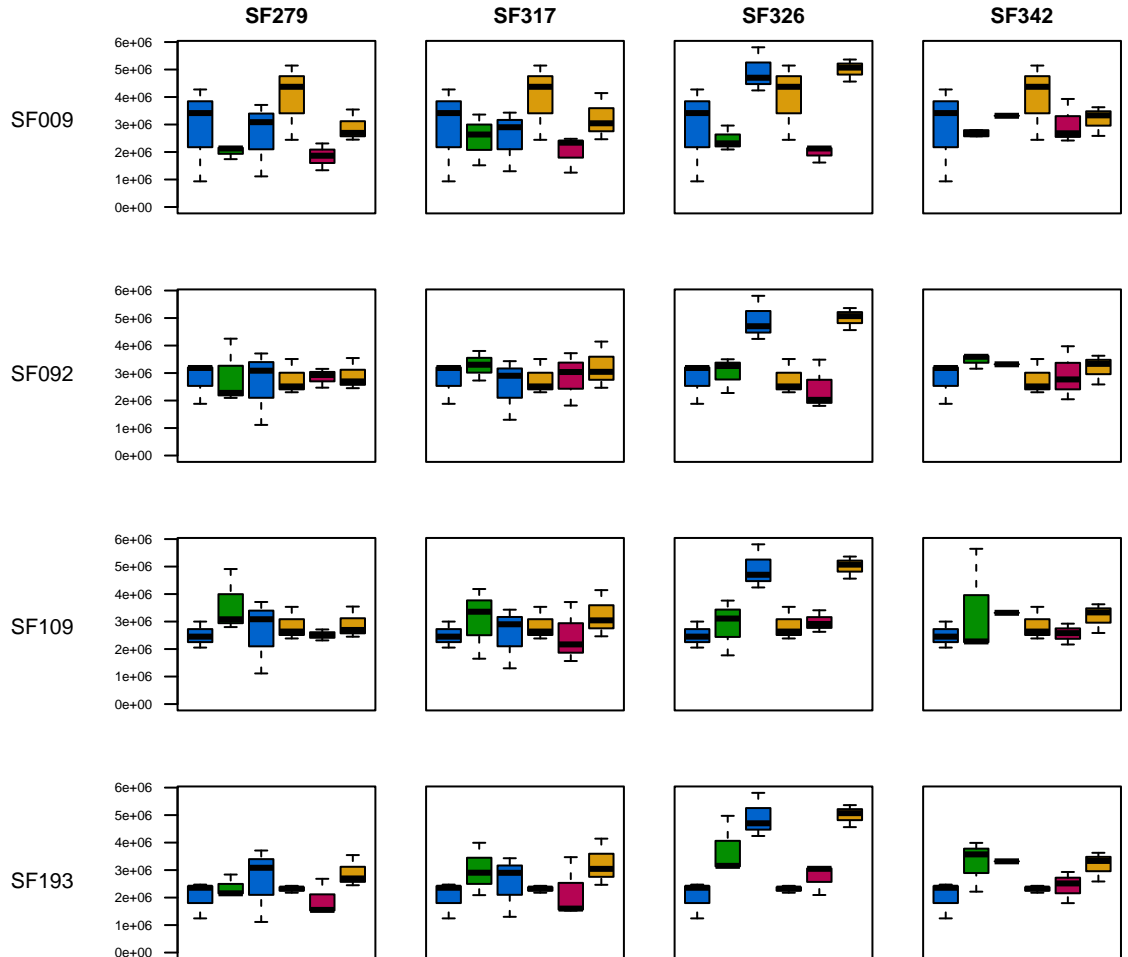

HanXRQChr04g0125461  
Putative grpE nucleotide exchange factor

- Parents WW
- Parents WD
- Hybrids WW
- Hybrids WD

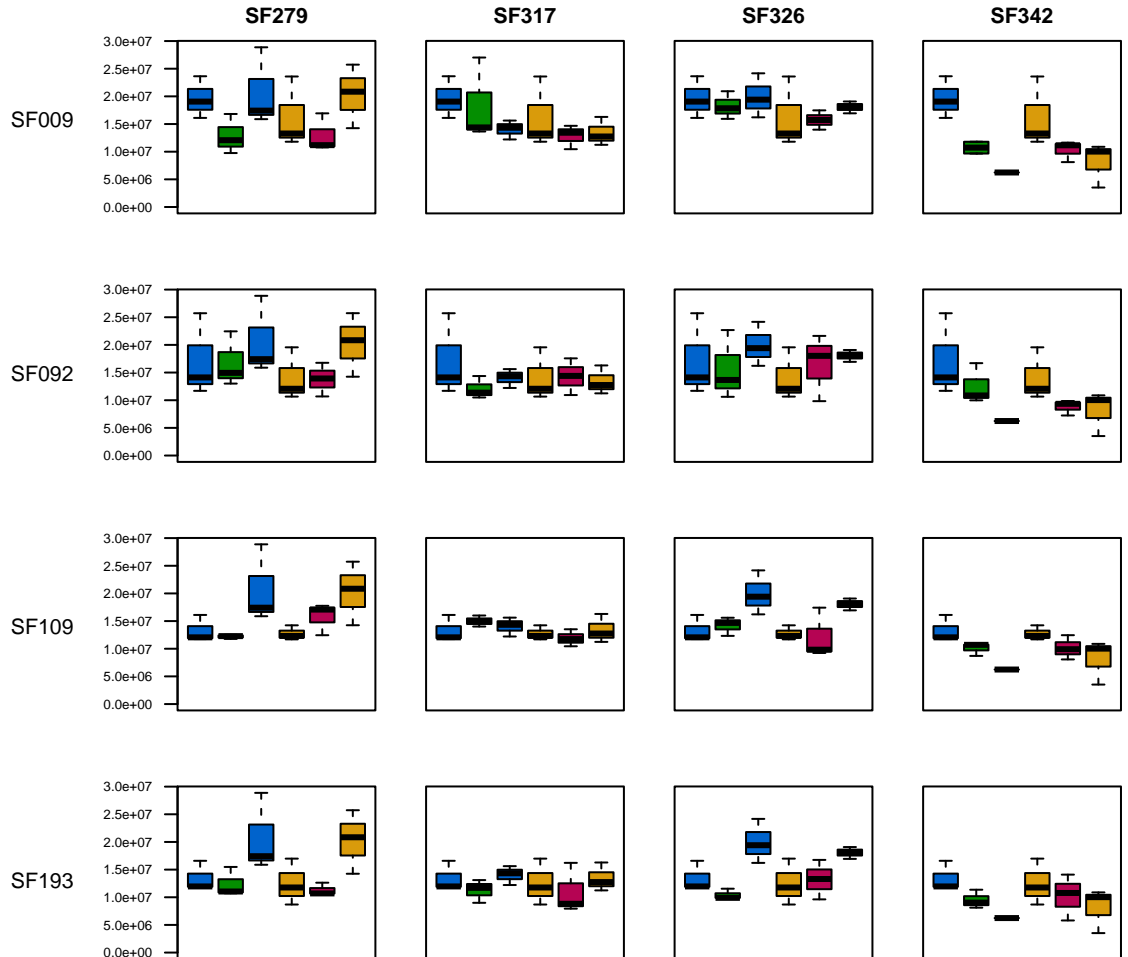

HanXRQChr03g0090751  
Putative EF-hand domain pair;  
Mitochondrial Rho GTPase

Parents WW  
Parents WD  
Hybrids WW  
Hybrids WD

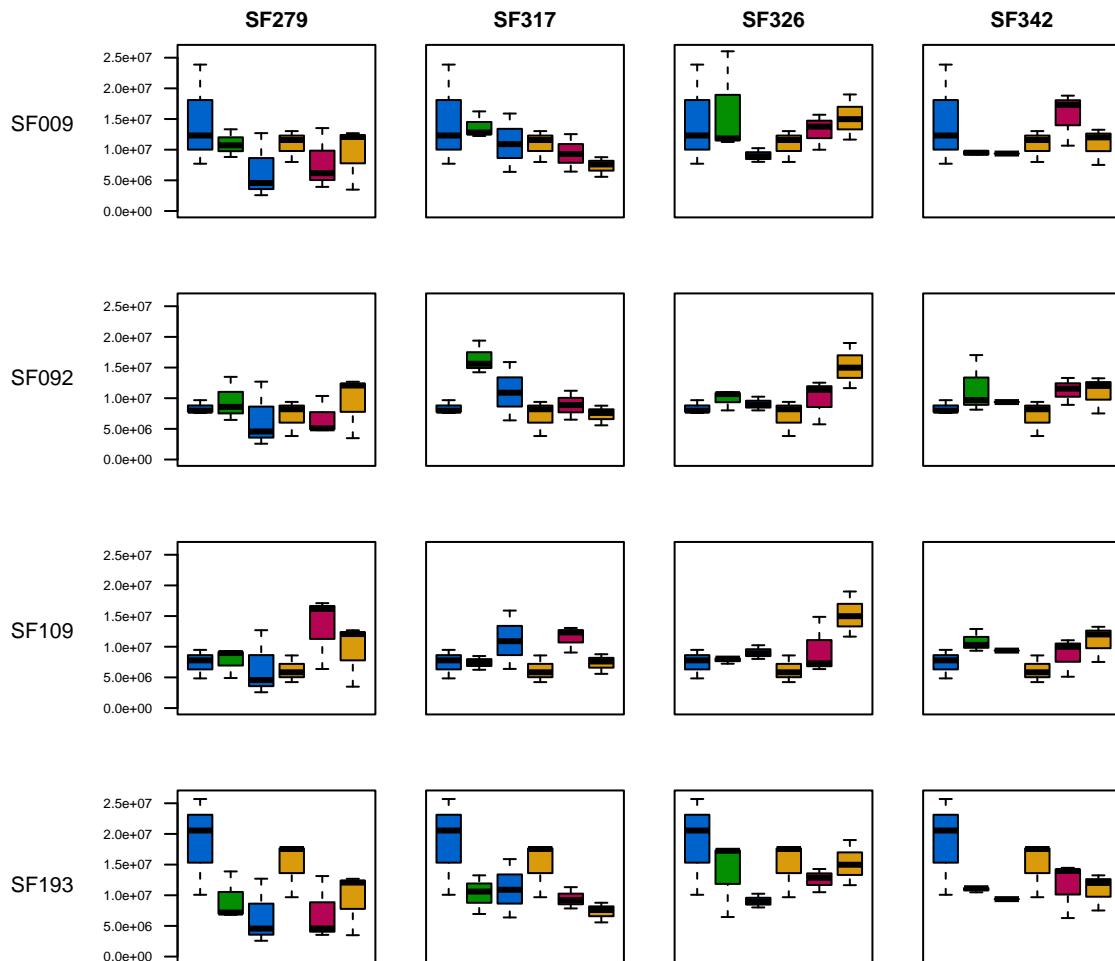

HanXRQChr10g0290201  
Putative S-crystallin

- Parents WW
- Parents WD
- Hybrids WW
- Hybrids WD

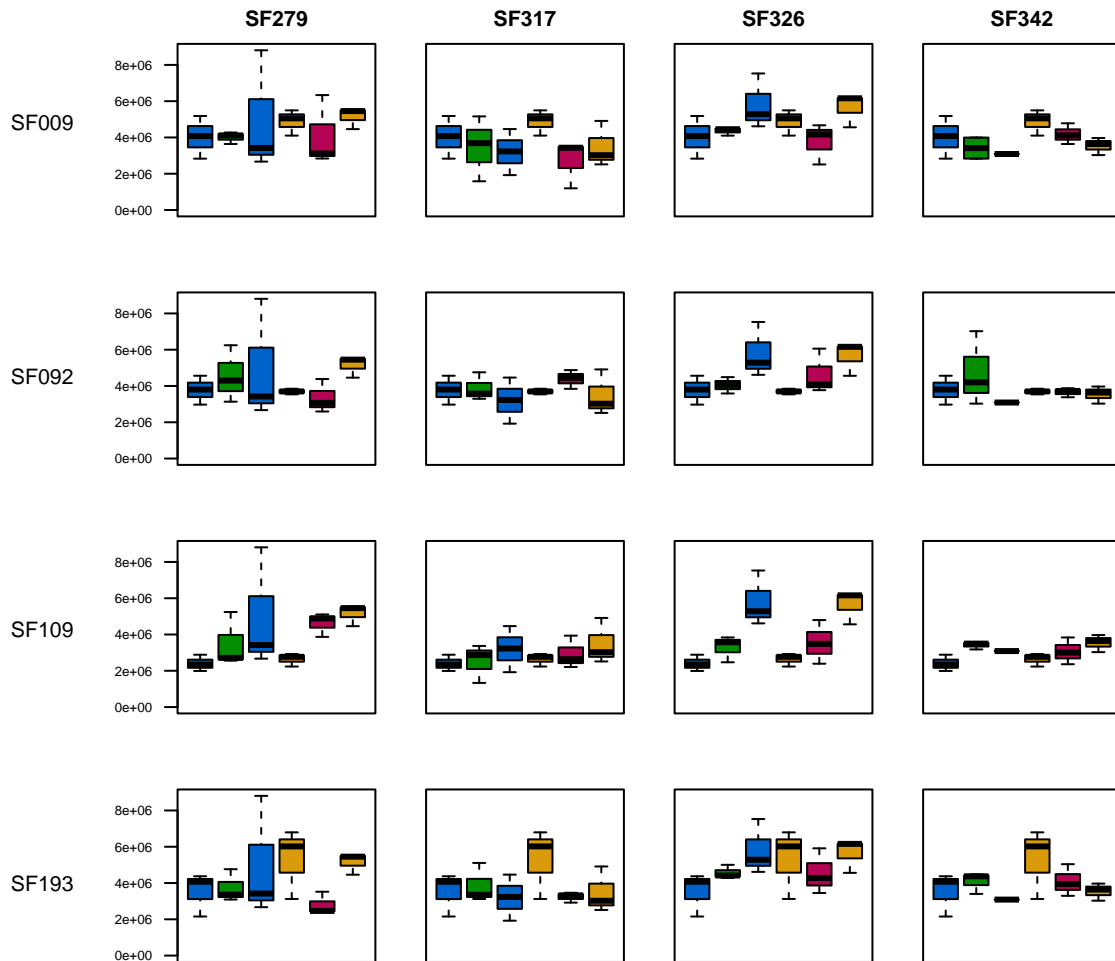

HanXRQChr10g0299031  
Probable glycine rich protein 2

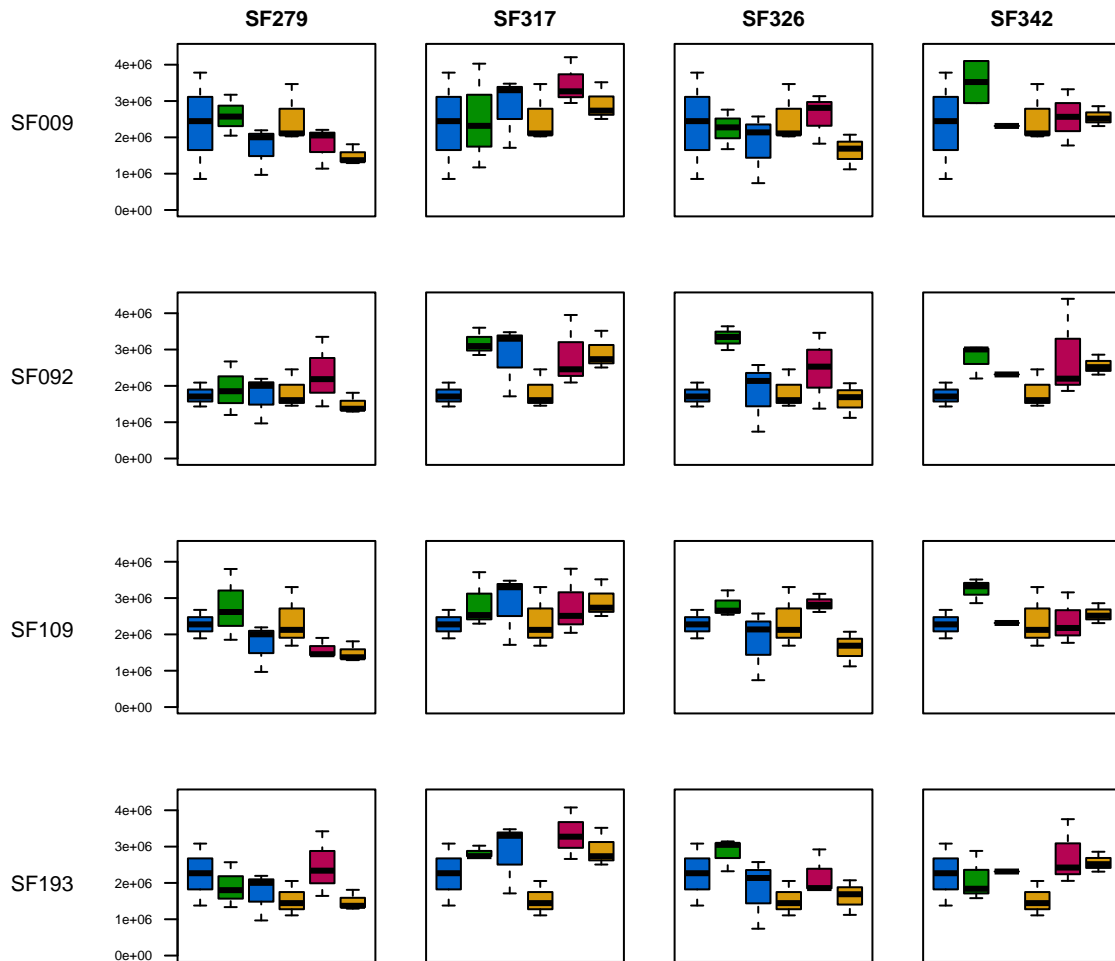



HanXRQChr04g0105831  
Putative ribosomal protein S4e; 40S  
ribosomal protein S4, C-terminal domain

Parents WW  
Parents WD  
Hybrids WW  
Hybrids WD

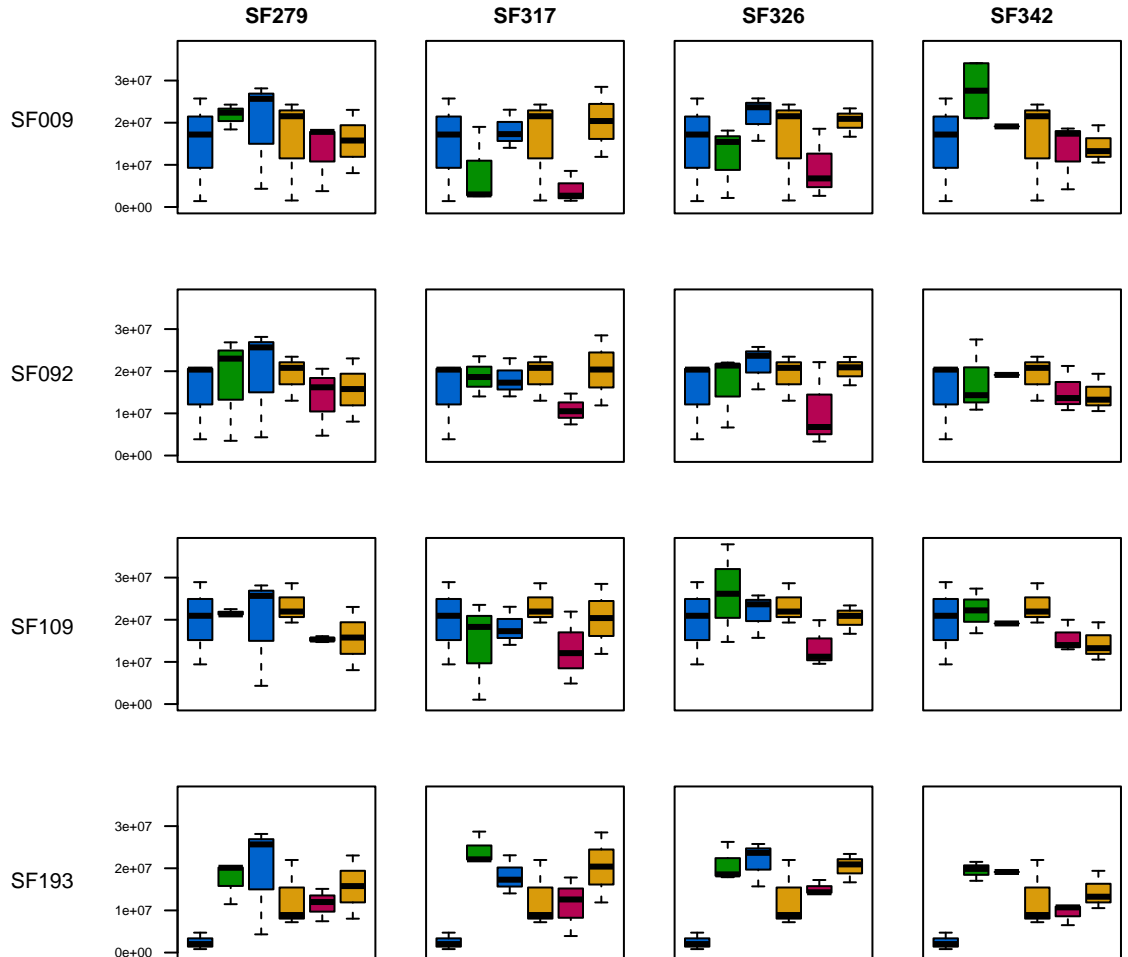

HanXRQChr09g0253541  
Probable remorin

Parents WW  
Parents WD  
Hybrids WW  
Hybrids WD

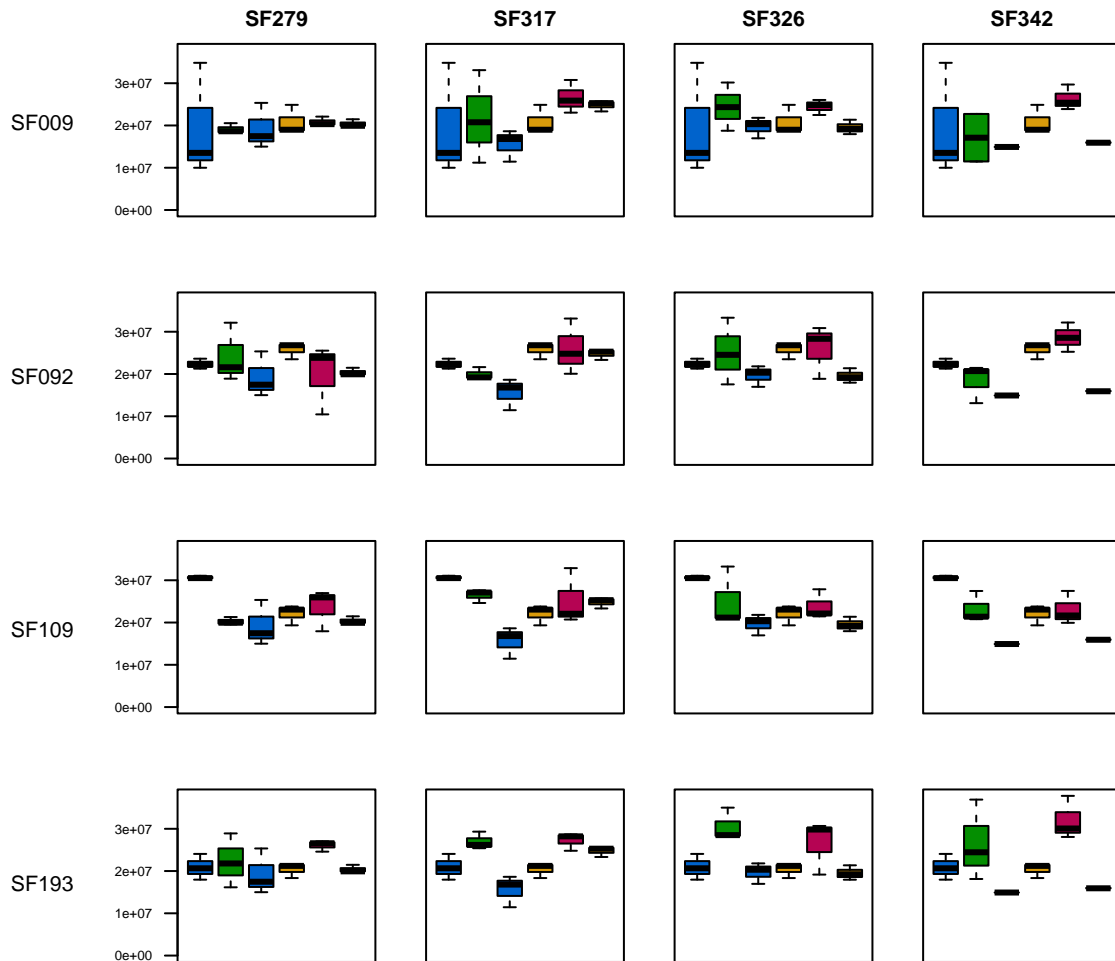

HanXRQCPg0580001  
Putative ATPase, F1 complex,  
delta/epsilon subunit; ATPase, F1 complex,

Parents WW  
Parents WD  
Hybrids WW  
Hybrids WD

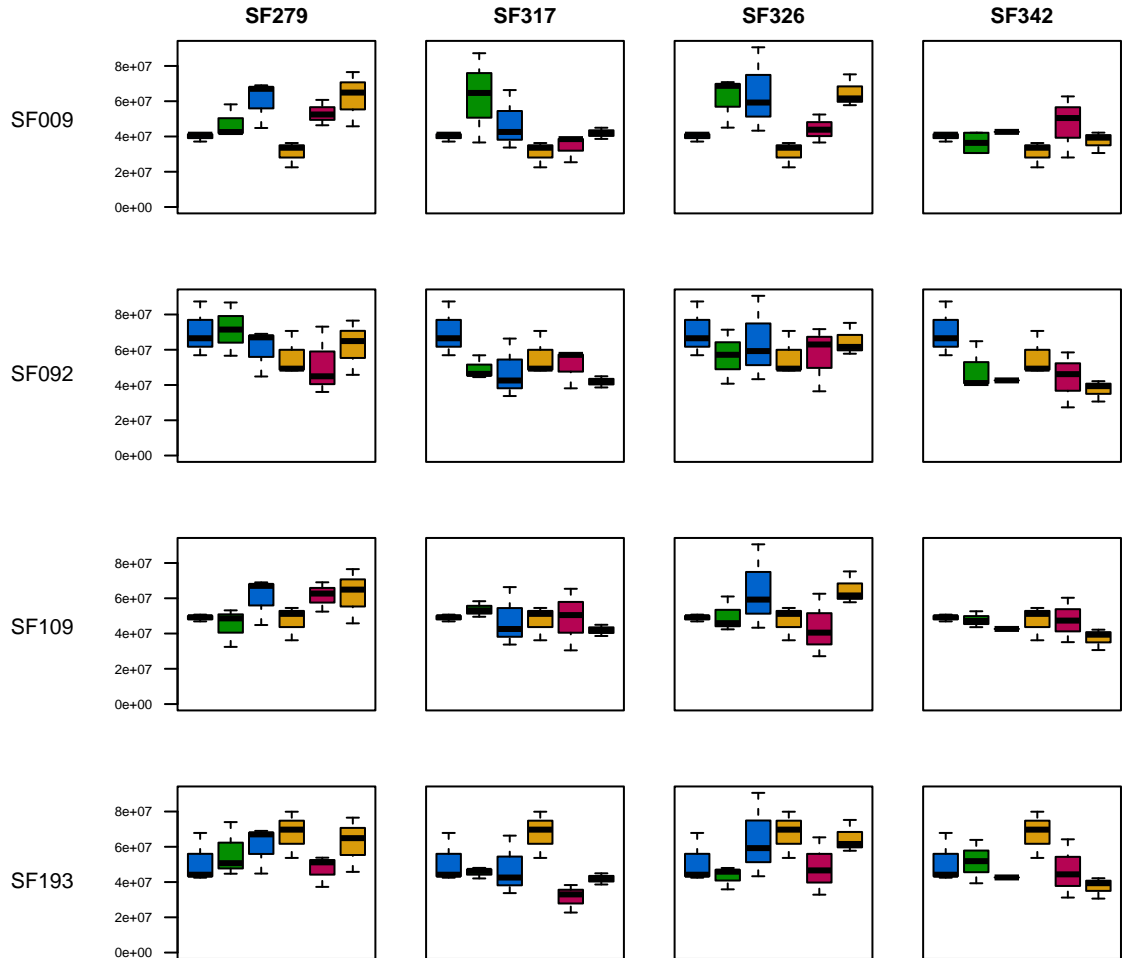

HanXRQChr04g0121181  
Uncharacterized conserved protein

- Parents WW
- Parents WD
- Hybrids WW
- Hybrids WD

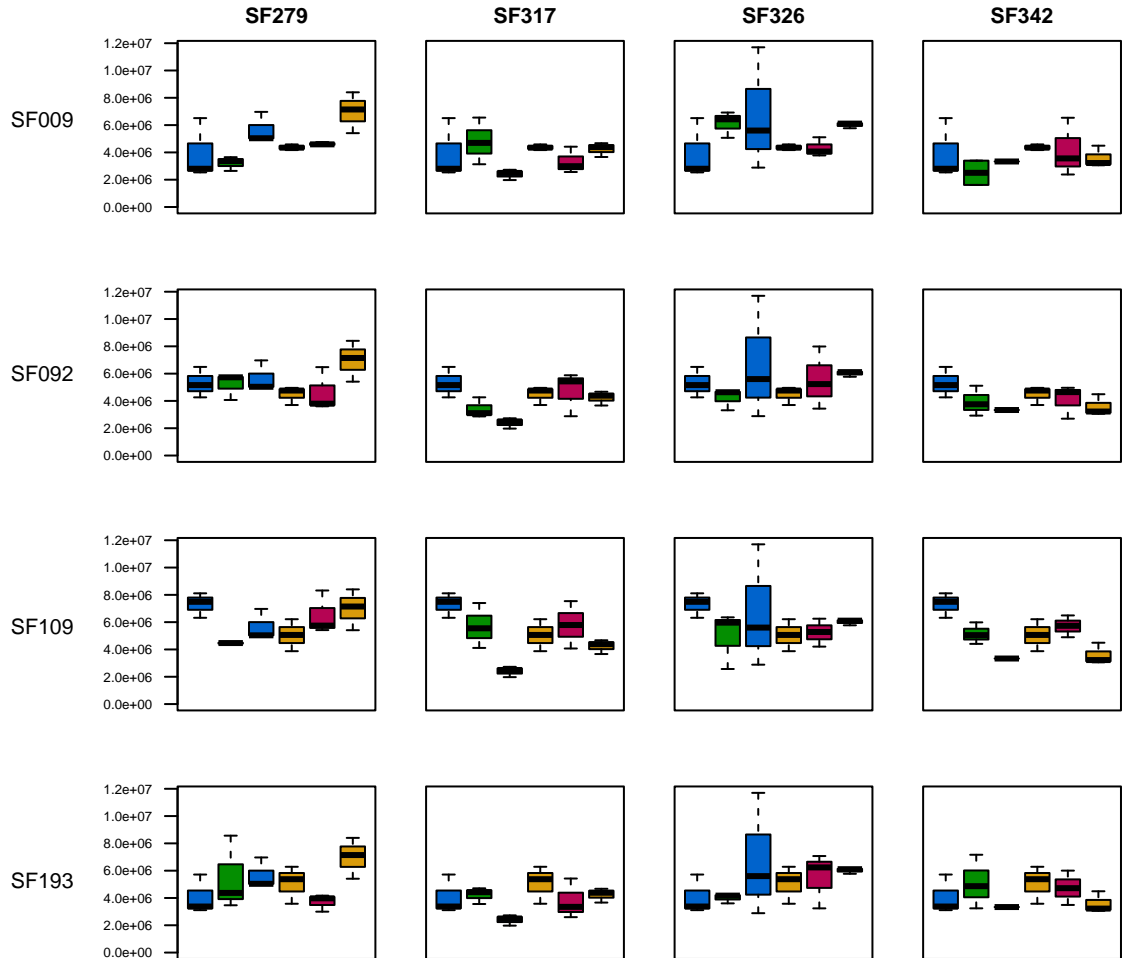

HanXRQChr12g0360081  
Putative pectinesterase inhibitor  
domain; Pectin lyase fold/virulence factor; F

Parents WW  
Parents WD  
Hybrids WW  
Hybrids WD

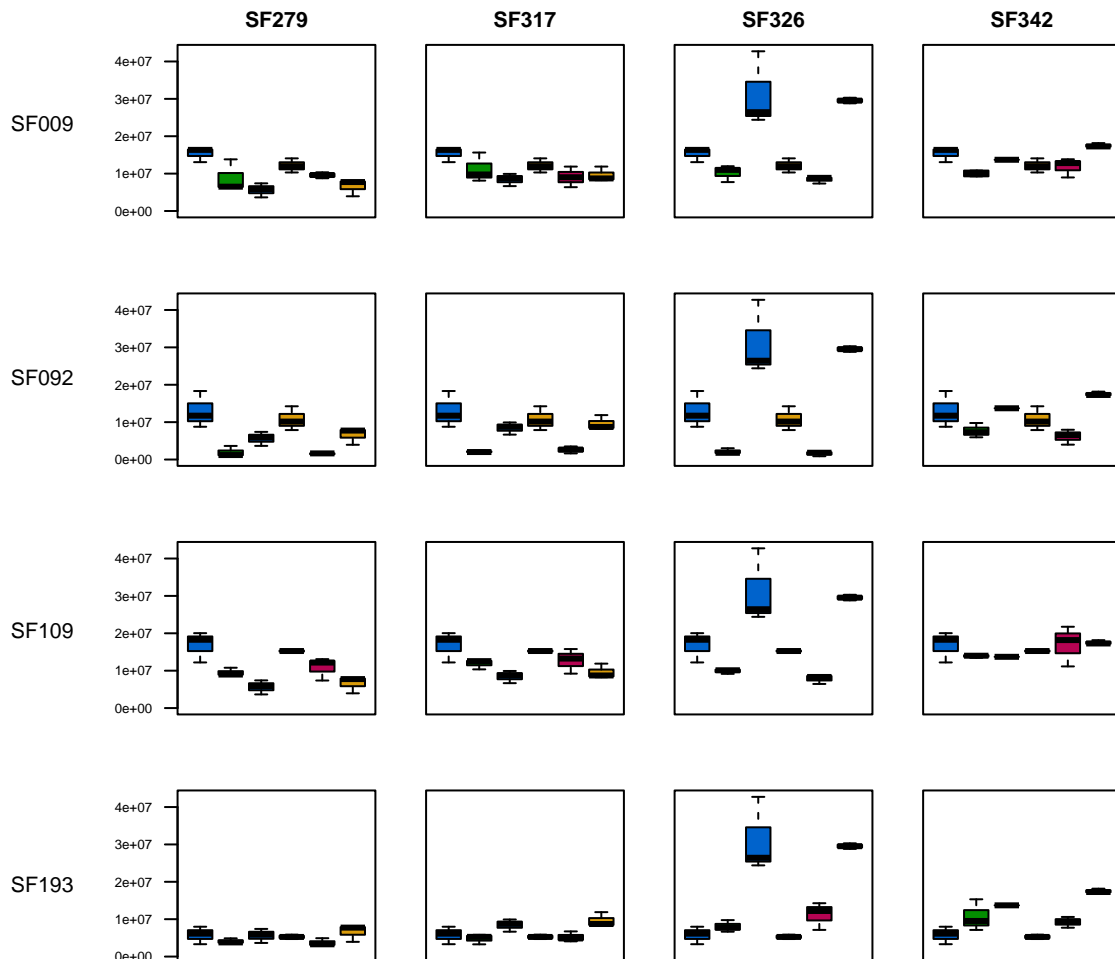

HanXRQChr09g0276191  
 Putative acid phosphatase, class  
 B-like; Acid phosphatase, plant; HAD-like (

■ Parents WW  
 ■ Parents WD  
 ■ Hybrids WW  
 ■ Hybrids WD

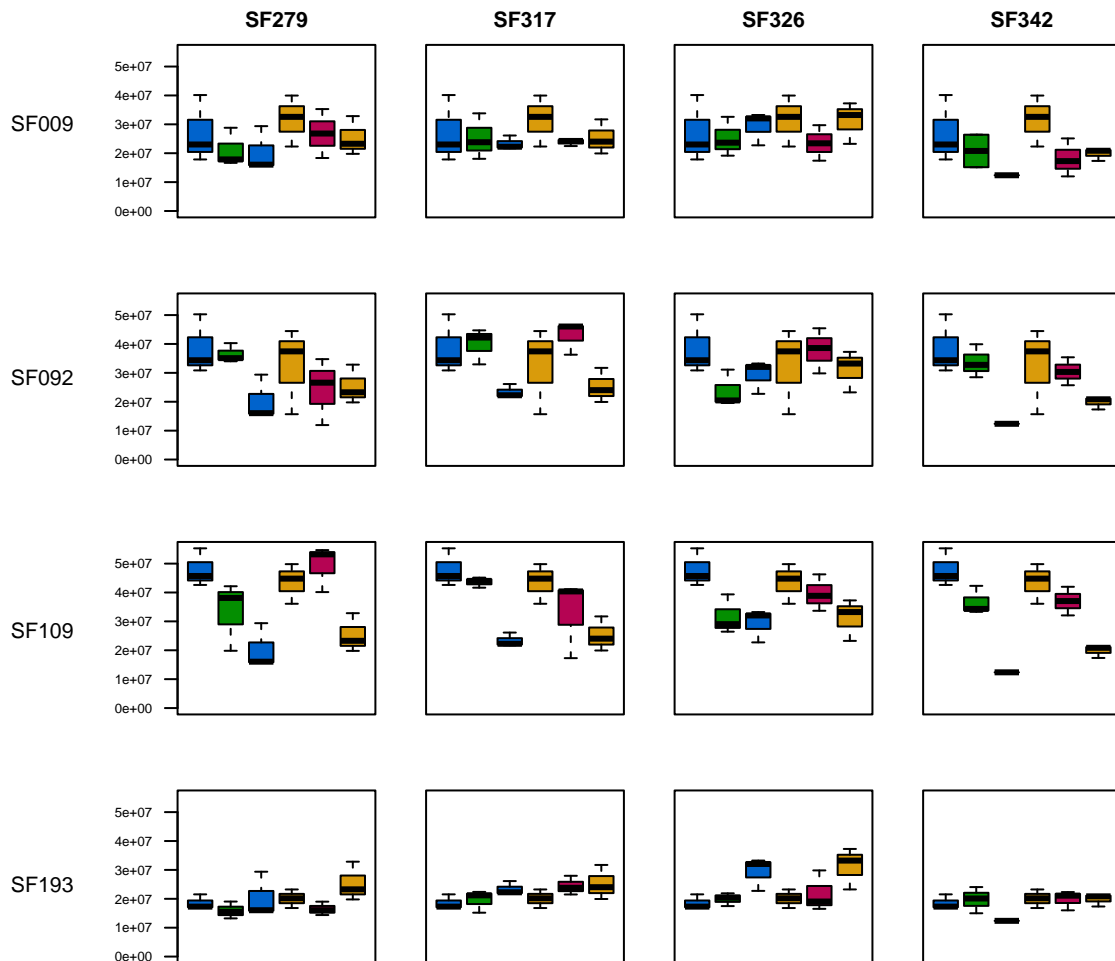

HanXRQChr05g0162231  
 Putative peptide chain release factor  
 eRF1/aRF1; Peptide Chain Release Factor

Parents WW  
 Parents WD  
 Hybrids WW  
 Hybrids WD

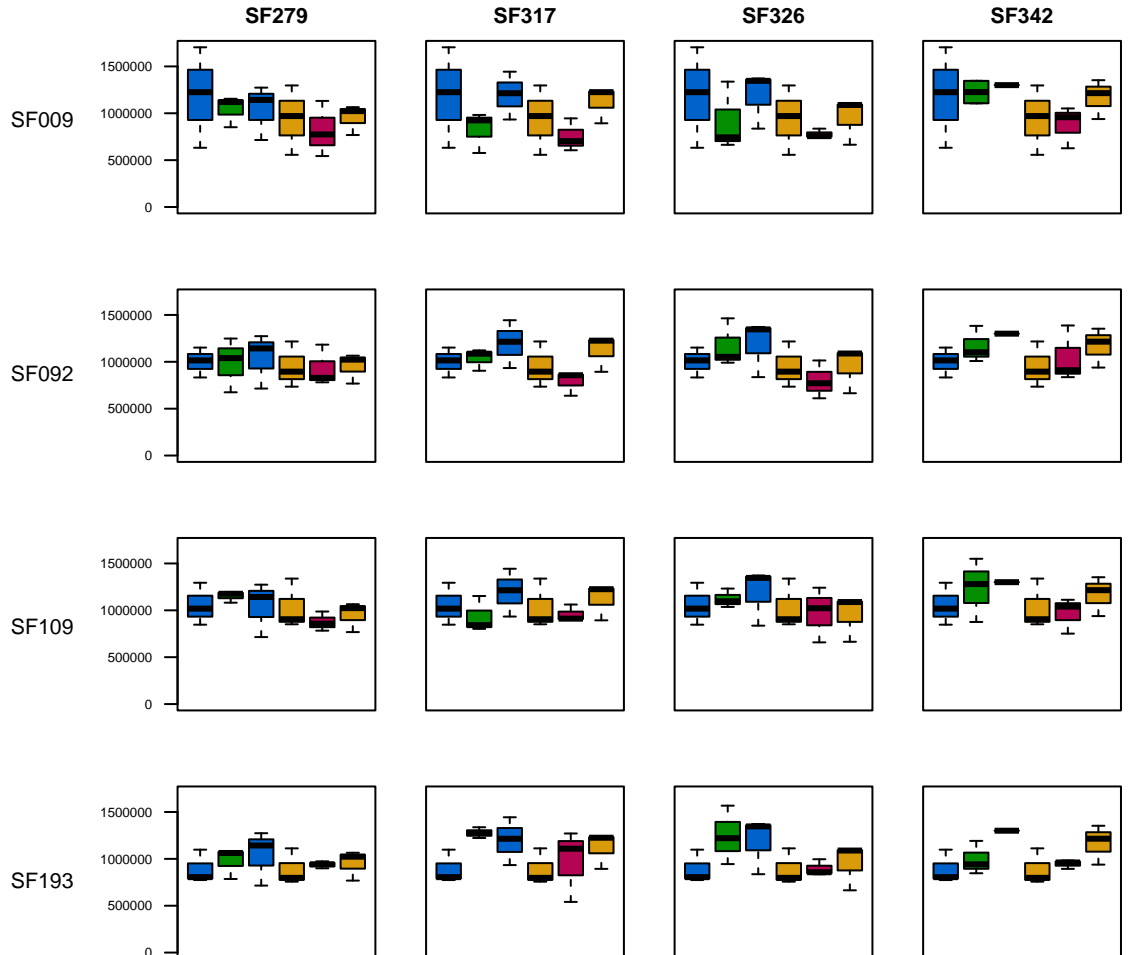

HanXRQChr02g0034681  
Probable thylakoid lumenal 17.9 kDa  
protein, chloroplast

Parents WW  
Parents WD  
Hybrids WW  
Hybrids WD

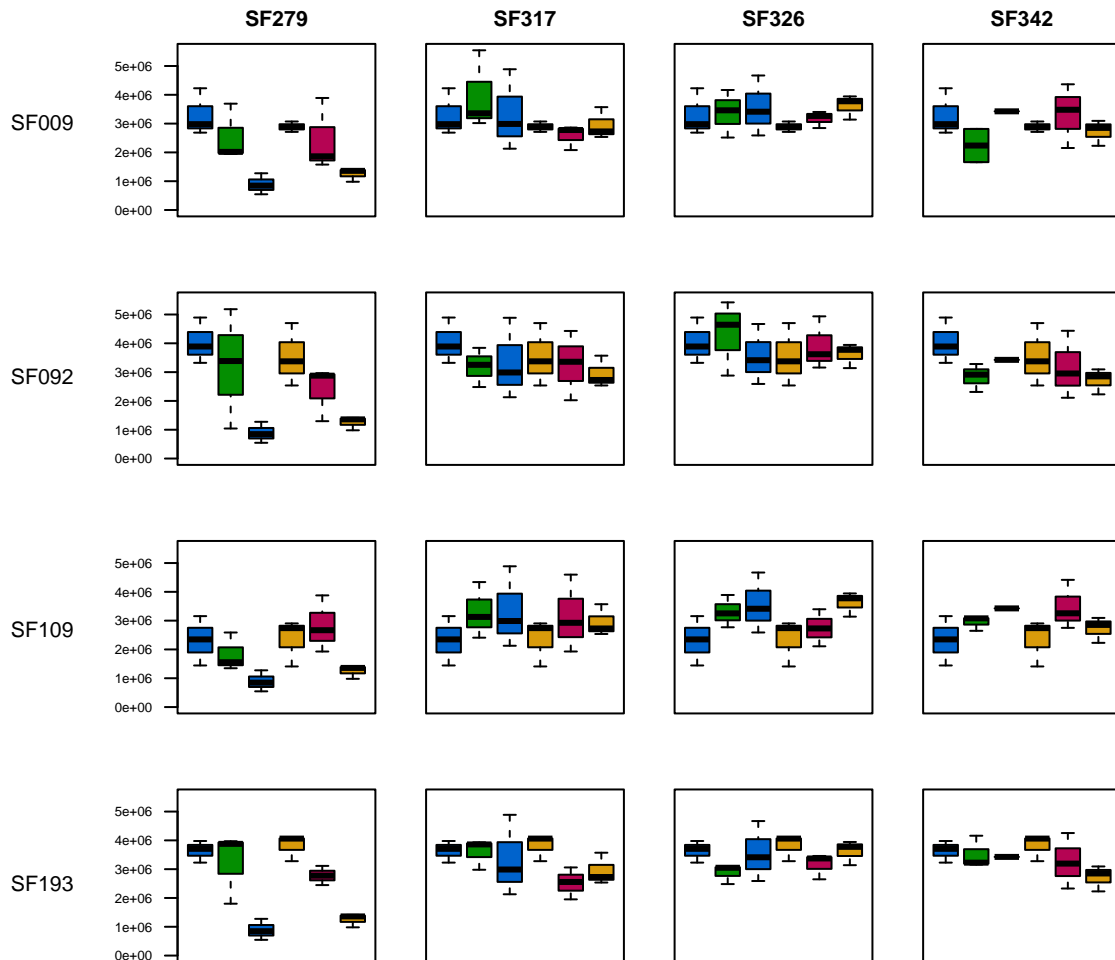



HanXRQChr10g0292011  
 Putative aspartic peptidase A1 family;  
 Aspartic peptidase domain; Xylanase inhibi

■ Parents WW  
 ■ Parents WD  
 ■ Hybrids WW  
 ■ Hybrids WD

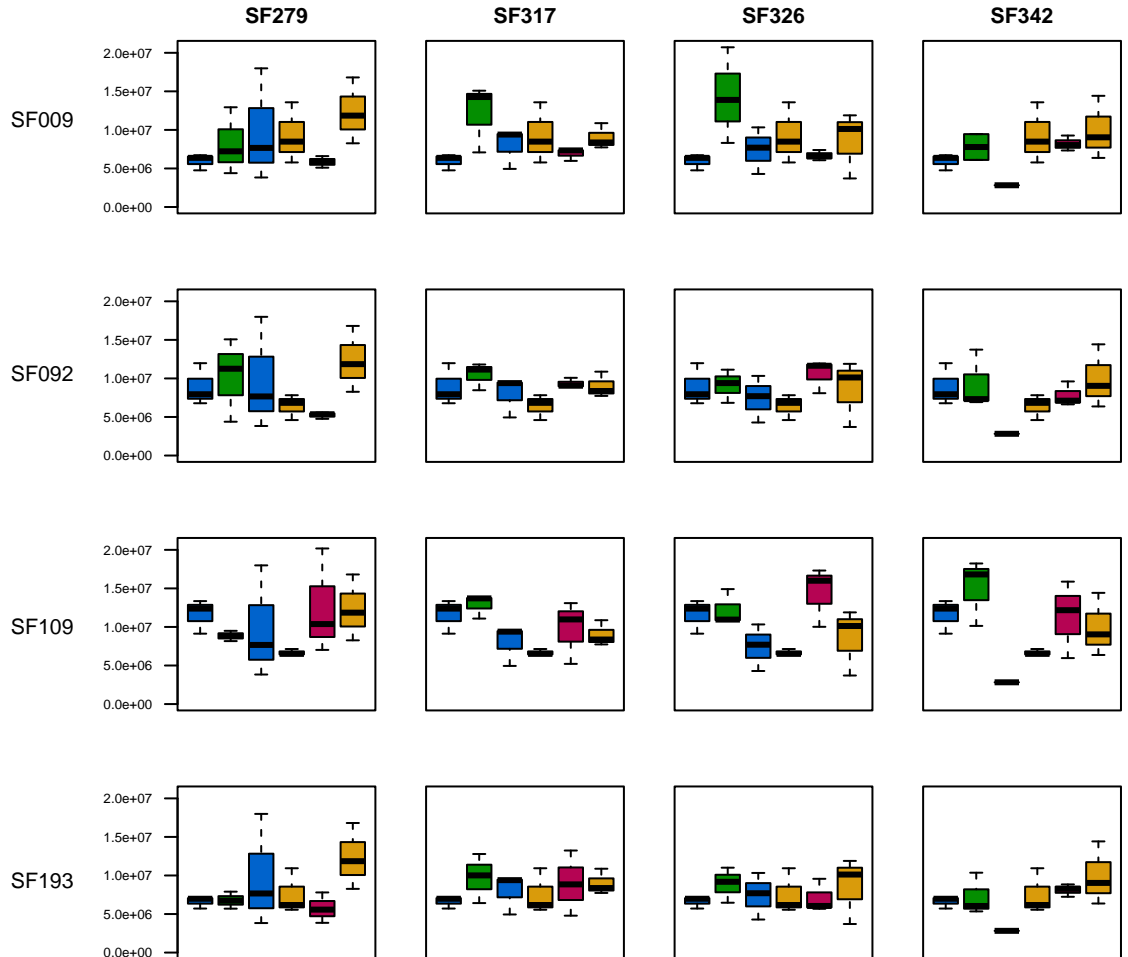

HanXRQChr11g0326521  
Putative chlorophyll A-B binding  
protein; Chlorophyll a/b binding protein dom

Parents WW  
Parents WD  
Hybrids WW  
Hybrids WD

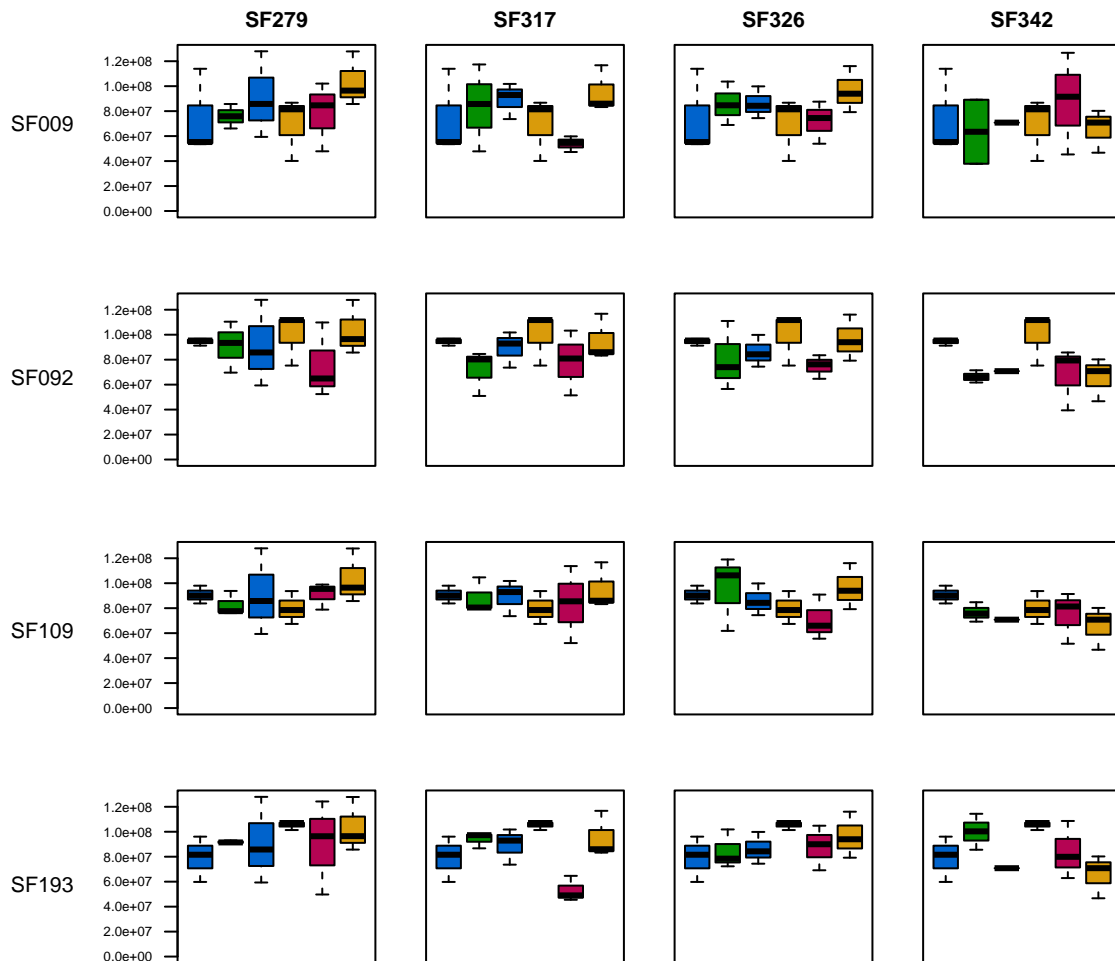

HanXRQChr05g0145711  
Putative S-crystallin; Glutathione  
S-transferase (GST)

Parents WW  
Parents WD  
Hybrids WW  
Hybrids WD

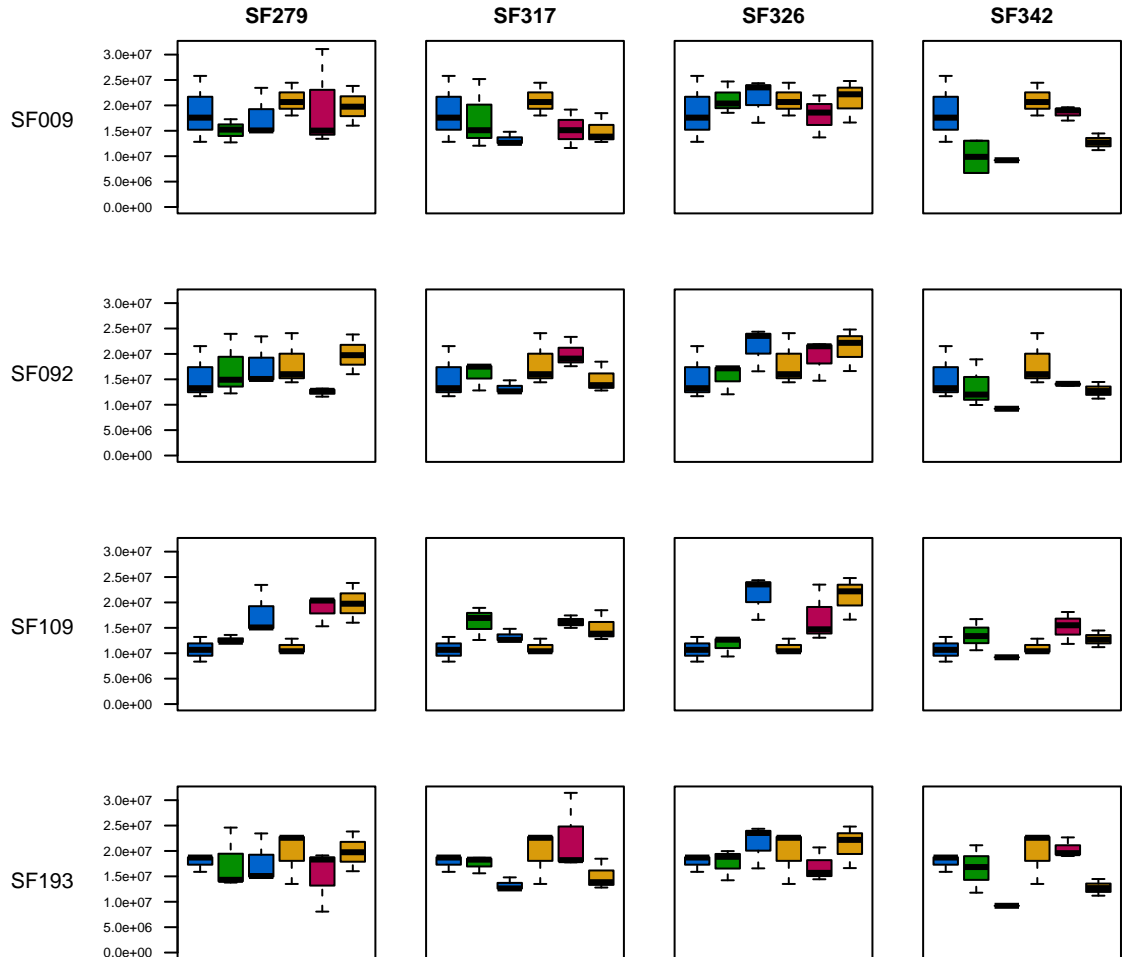

HanXRQChr04g0115801  
Probable 60S ribosomal protein L11

Parents WW  
Parents WD  
Hybrids WW  
Hybrids WD

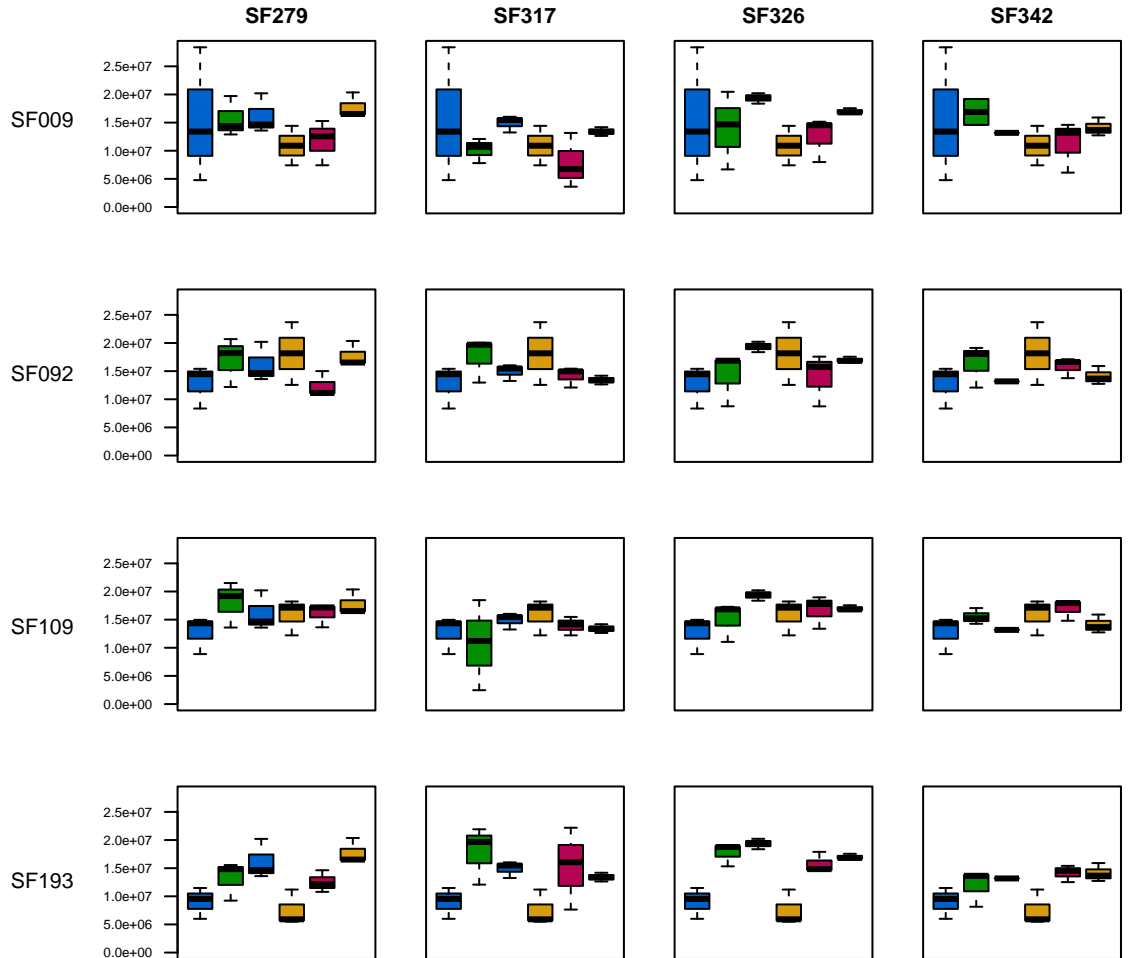

HanXRQChr01g0028911  
Probable aldolase superfamily protein

Parents WW  
Parents WD  
Hybrids WW  
Hybrids WD

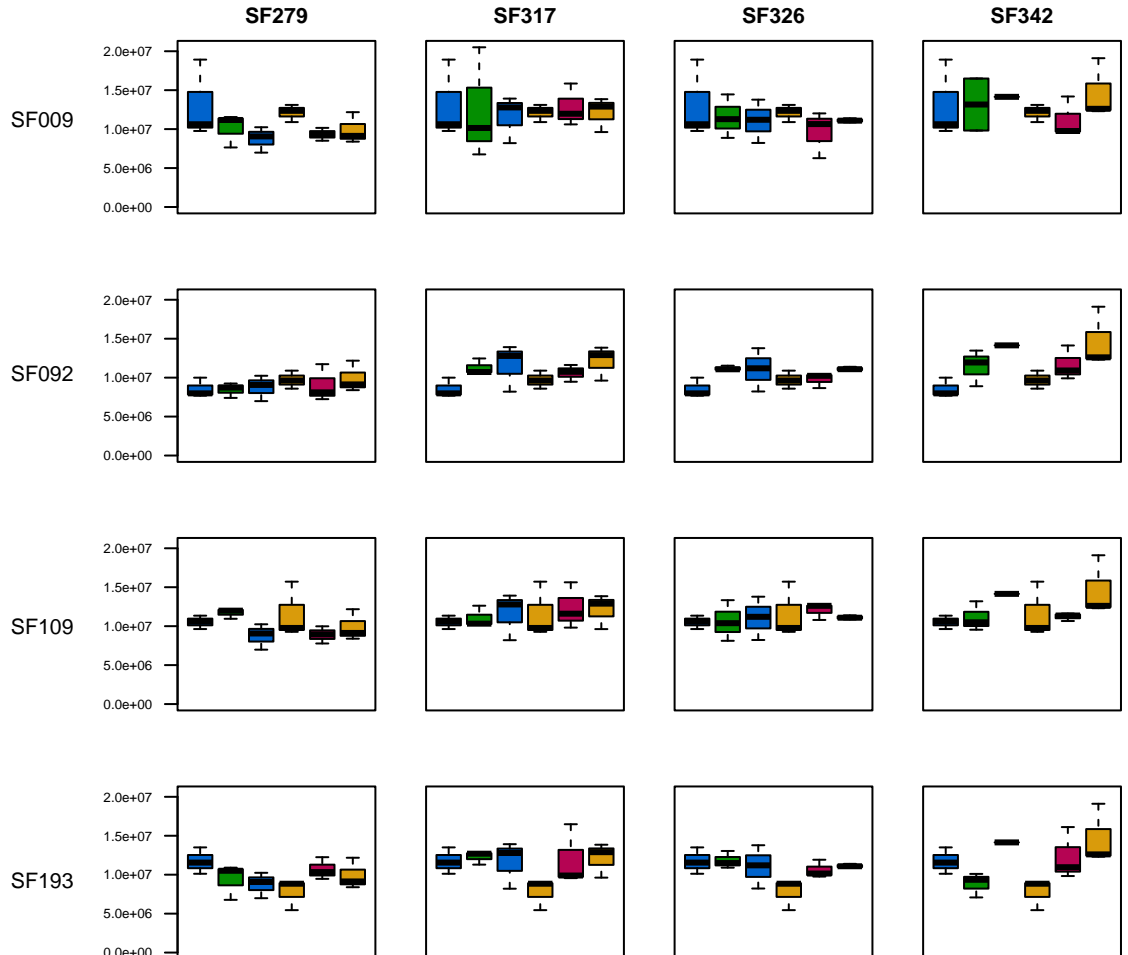

HanXRQChr10g0319701  
Probable cysteine proteinases  
superfamily protein

Parents WW  
Parents WD  
Hybrids WW  
Hybrids WD

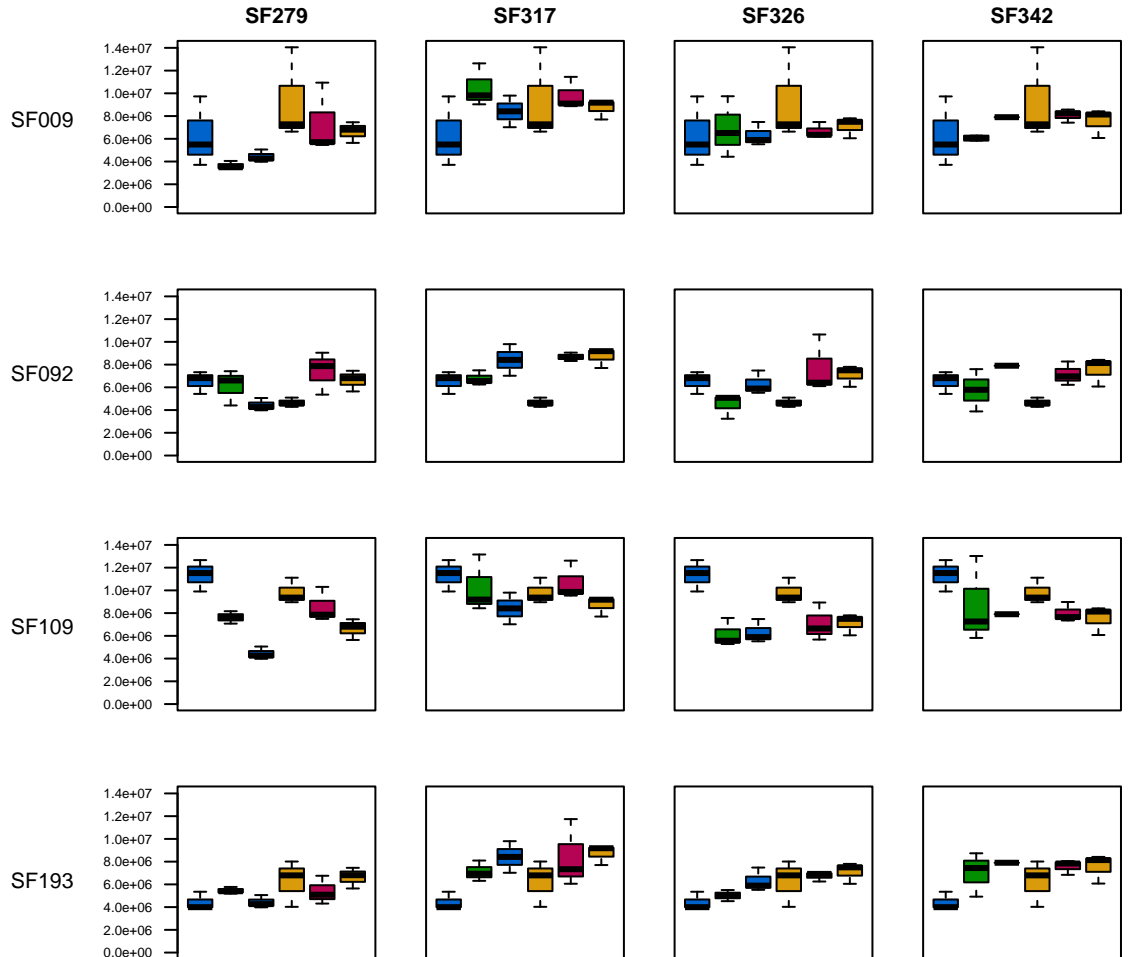

HanXRQChr12g0376551  
Putative ribosomal protein S7e

- Parents WW
- Parents WD
- Hybrids WW
- Hybrids WD

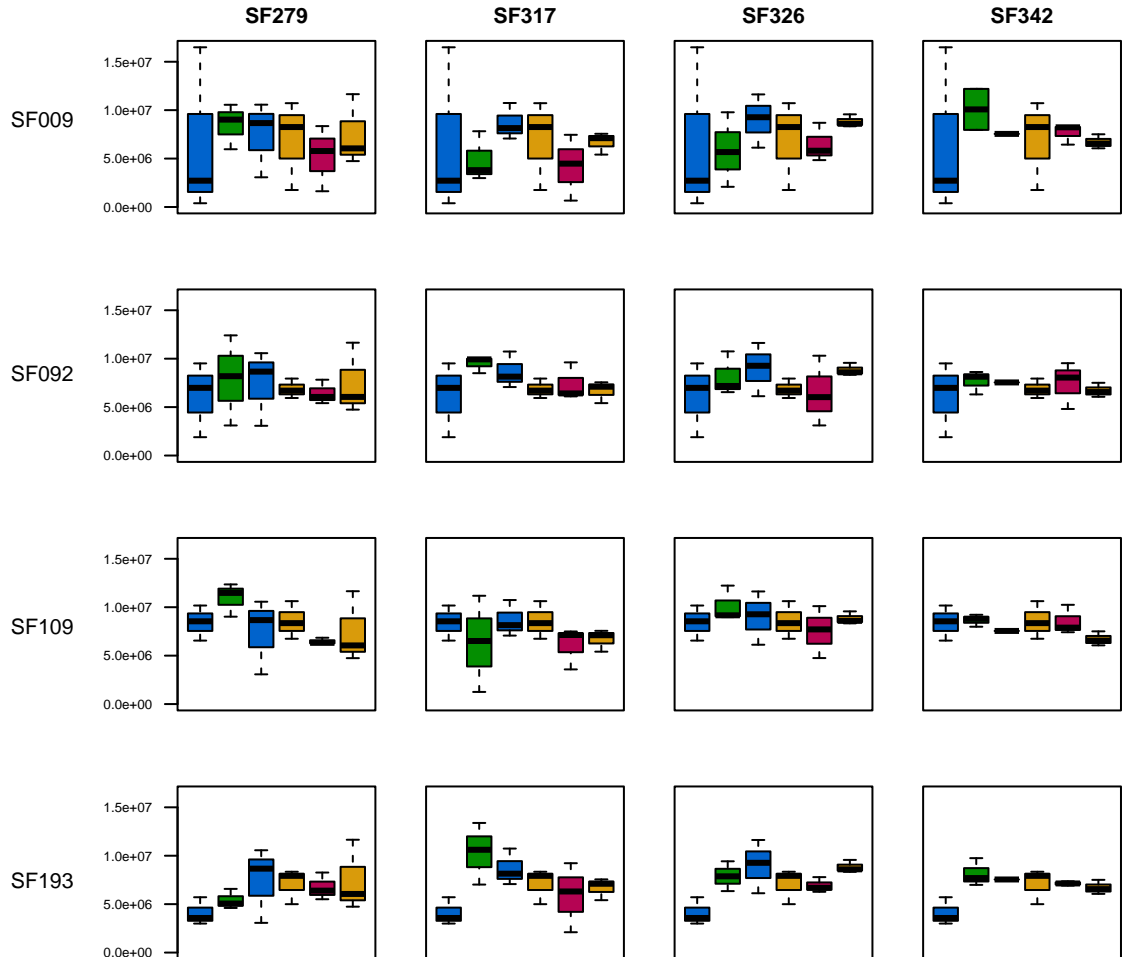

HanXRQChr16g0512141  
Plant Protein of unknown function  
(DUF827)

Parents WW  
Parents WD  
Hybrids WW  
Hybrids WD

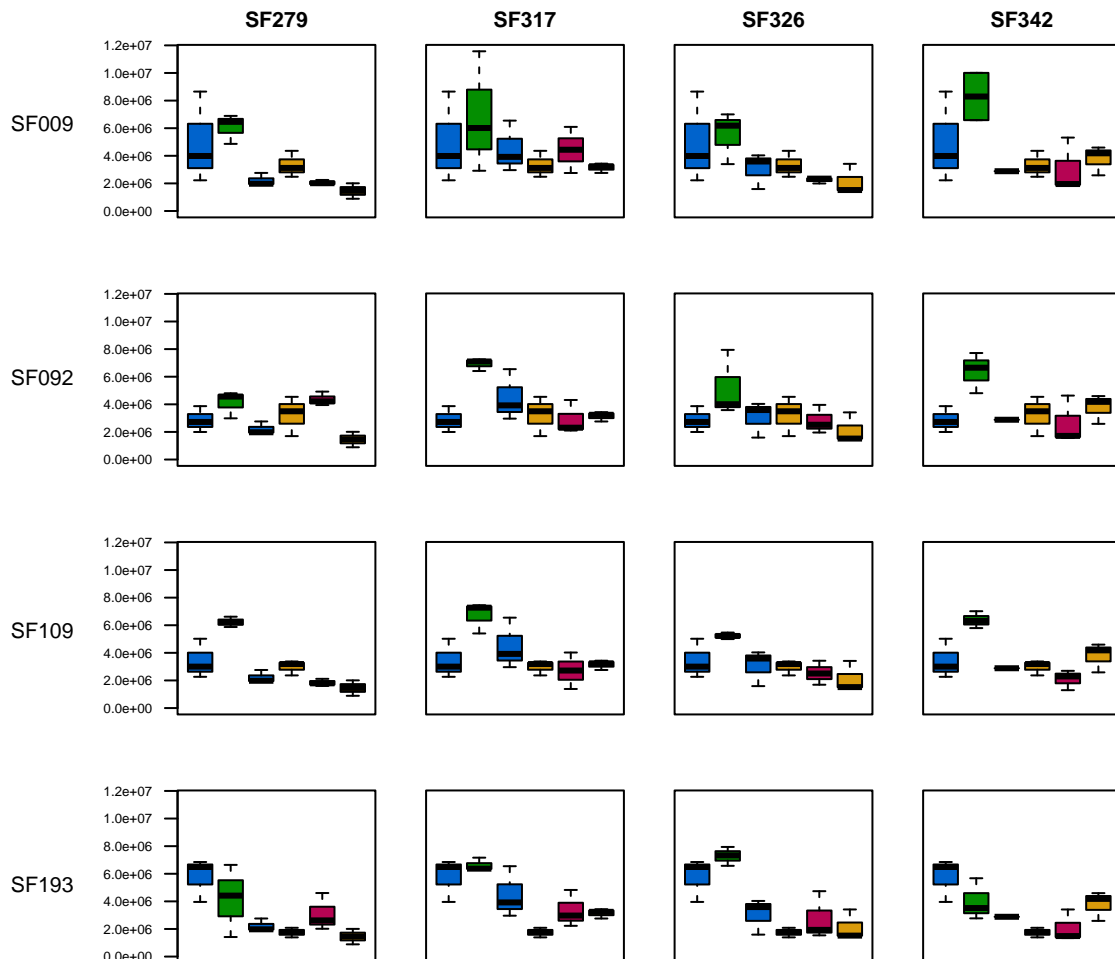



HanXRQChr05g0135521  
Probable alpha-glucan phosphorylase, H  
isozyme

Parents WW  
Parents WD  
Hybrids WW  
Hybrids WD

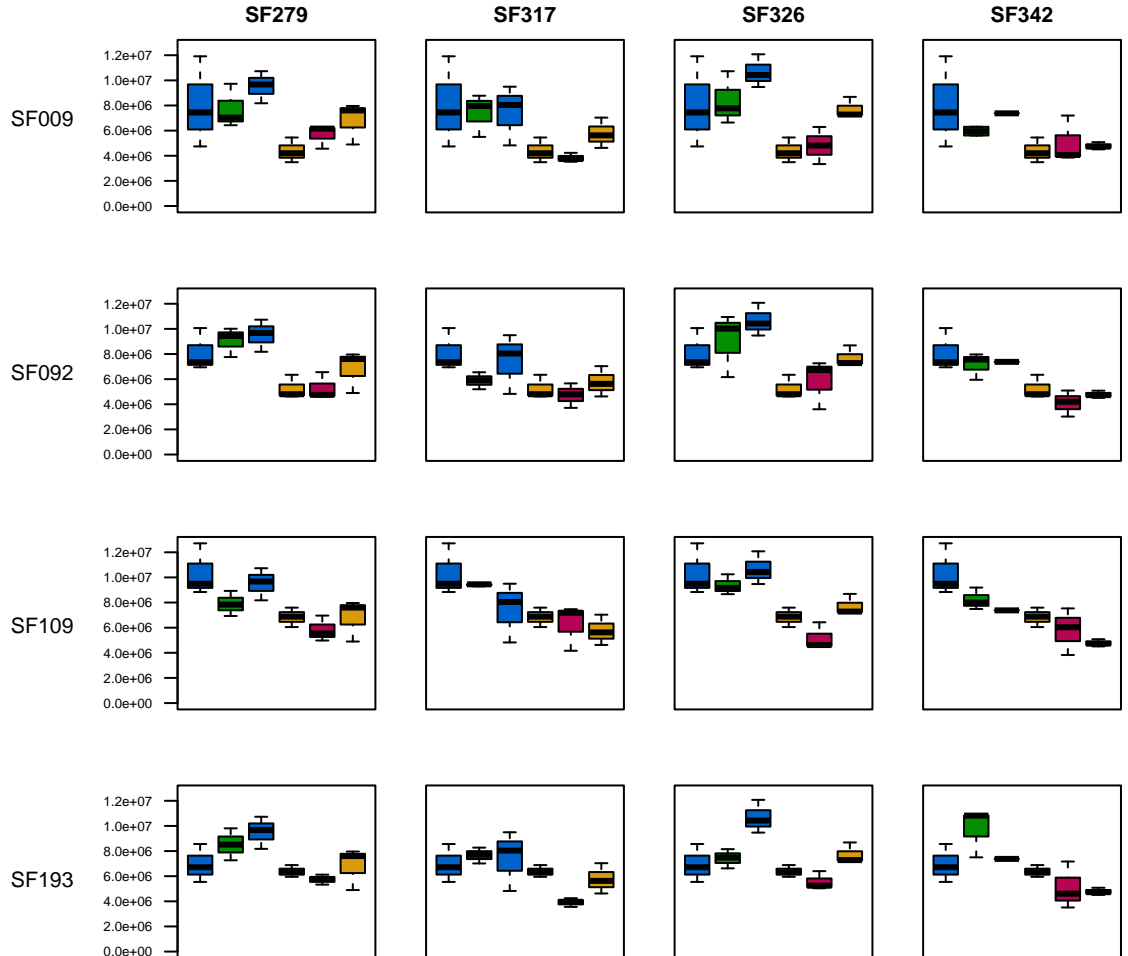

HanXRQChr14g0455611  
Putative PPC domain

Parents WW  
Parents WD  
Hybrids WW  
Hybrids WD

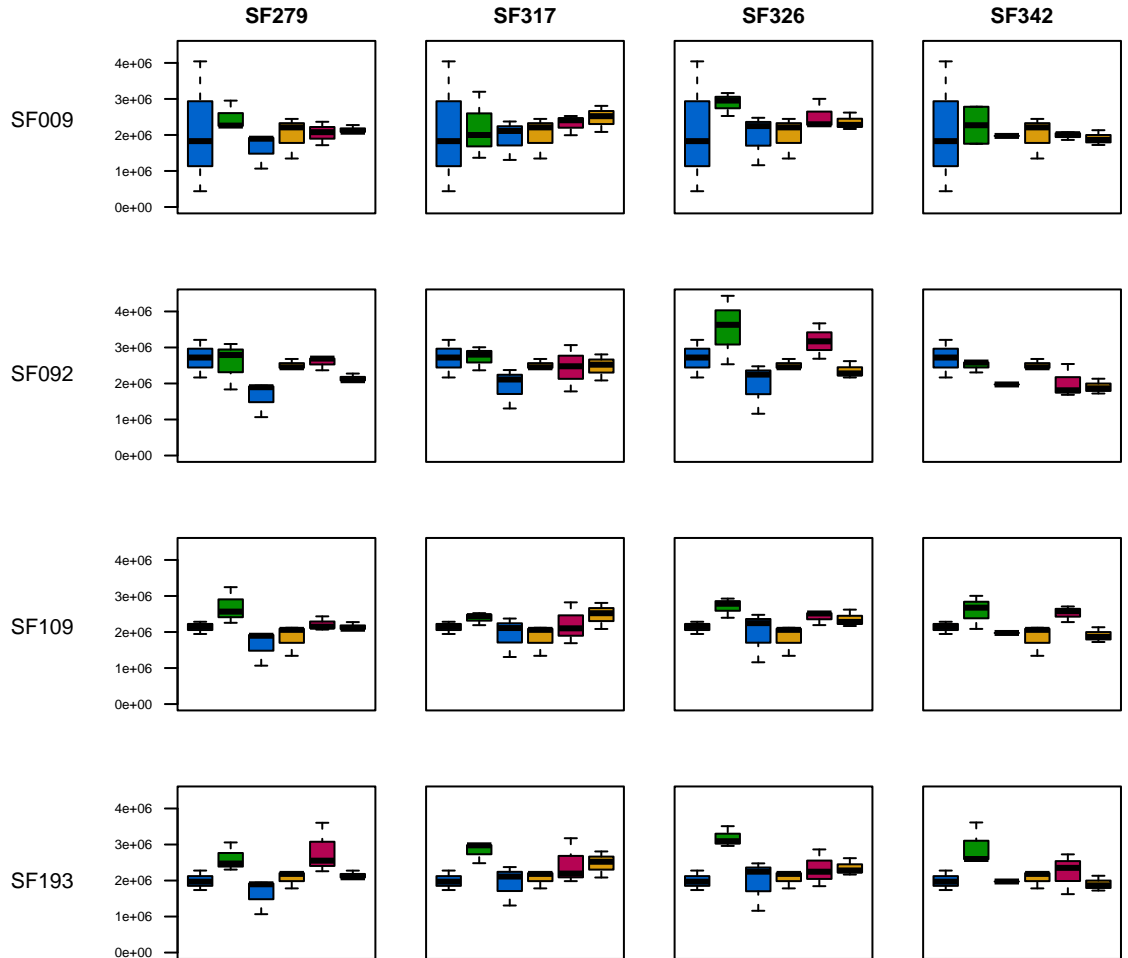

HanXRQChr08g0213481  
Uncharacterized conserved protein

- Parents WW
- Parents WD
- Hybrids WW
- Hybrids WD

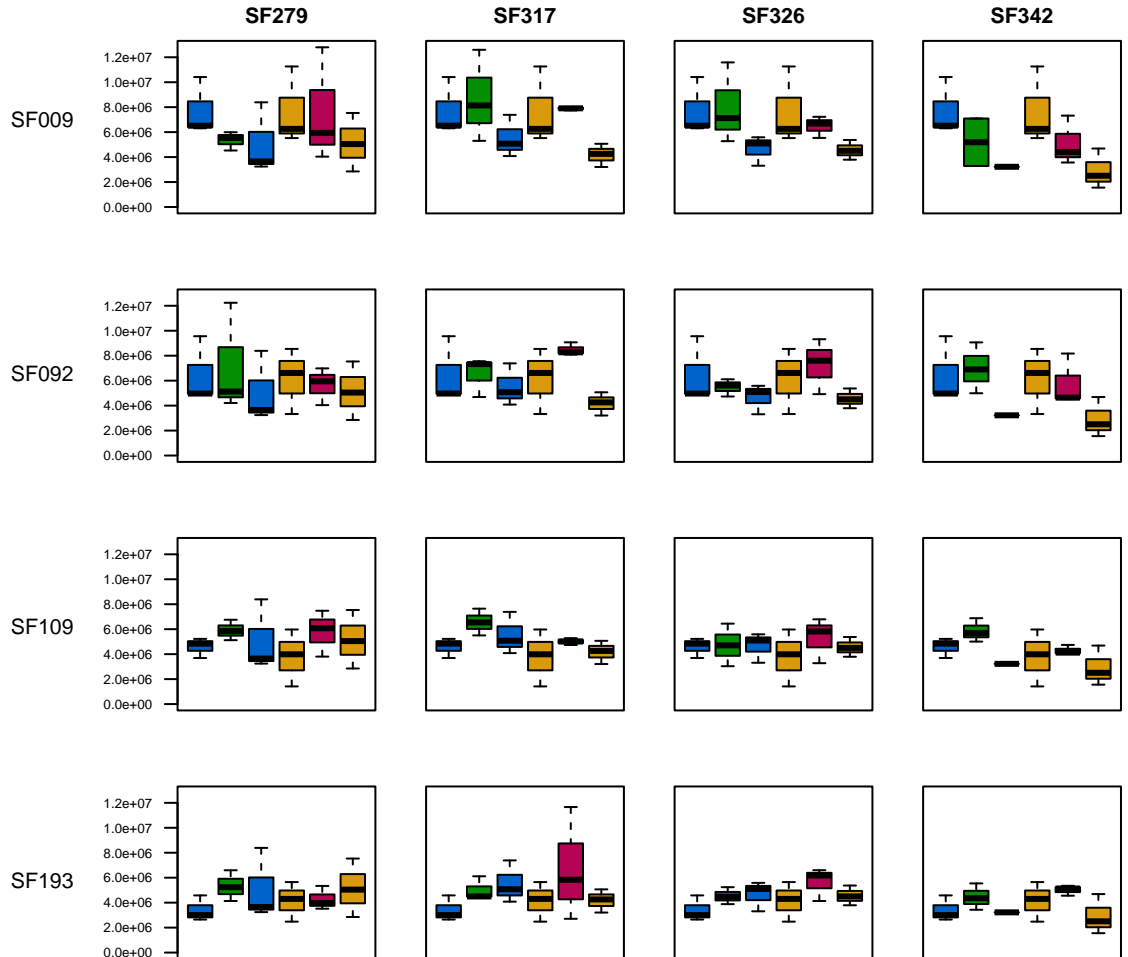

HanXRQChr13g0410681  
Probable KH domain-containing protein

Parents WW  
Parents WD  
Hybrids WW  
Hybrids WD

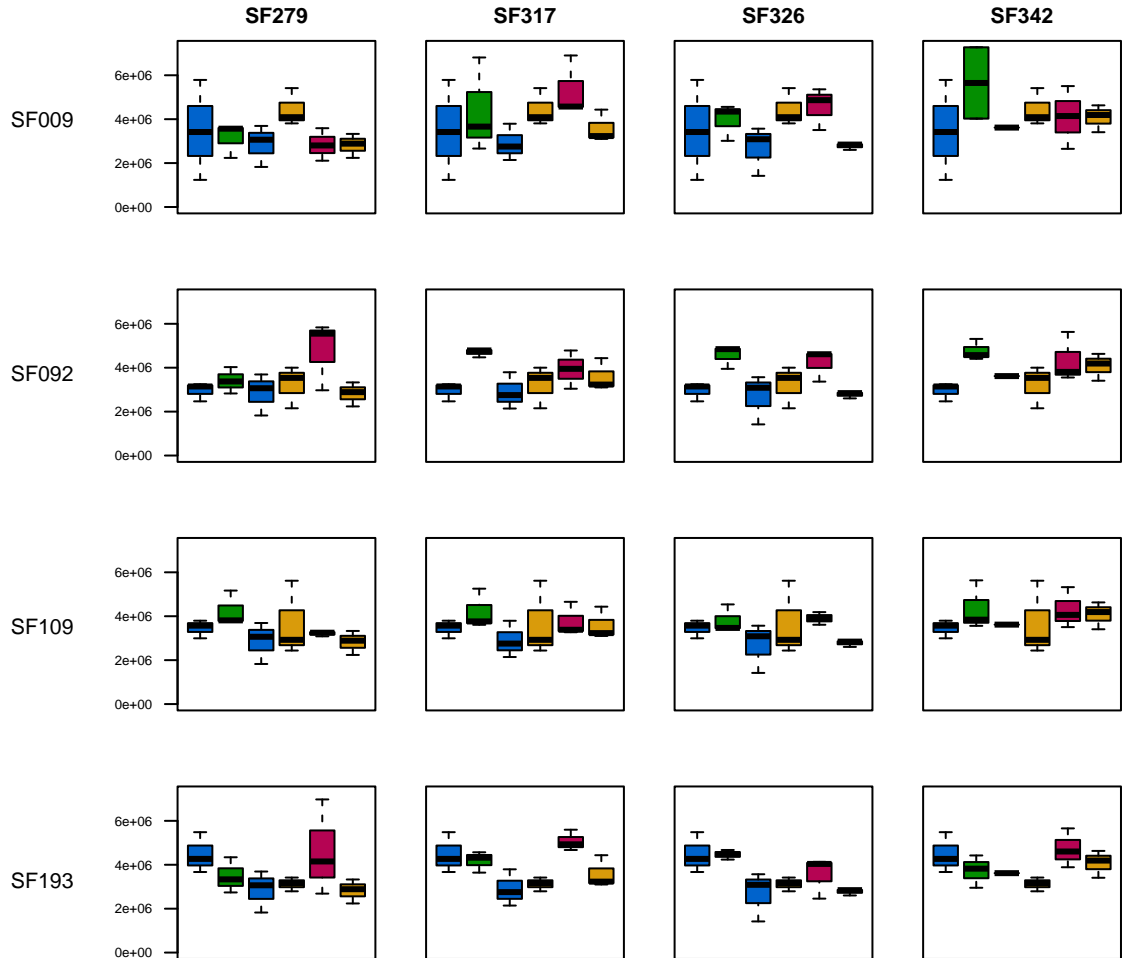

HanXRQChr14g0451901  
Putative 4-hydroxyphenylpyruvate  
dioxygenase; Glyoxalase/Bleomycin resista

Parents WW  
Parents WD  
Hybrids WW  
Hybrids WD

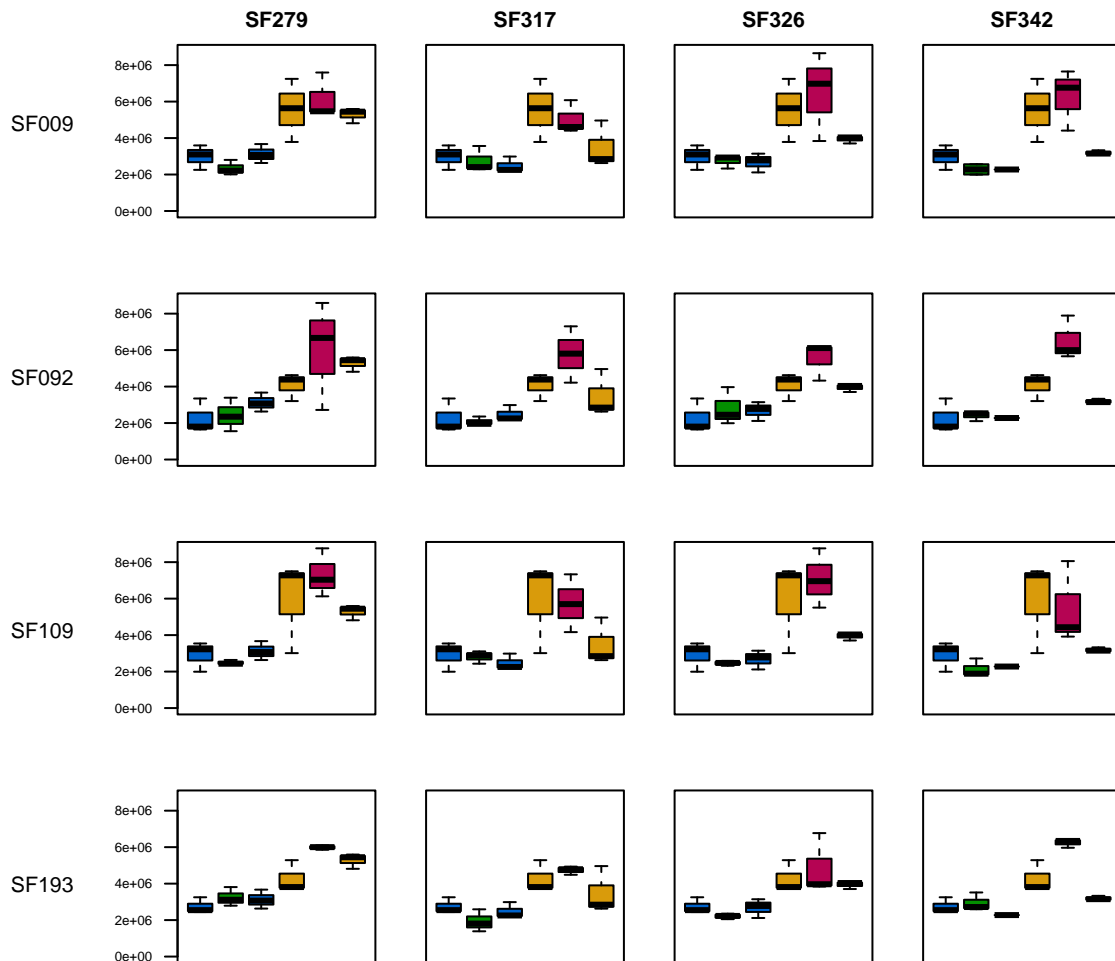

HanXRQChr16g0531101  
Putative fructose-bisphosphate  
aldolase, class-I; Aldolase-type TIM barrel

Parents WW  
Parents WD  
Hybrids WW  
Hybrids WD

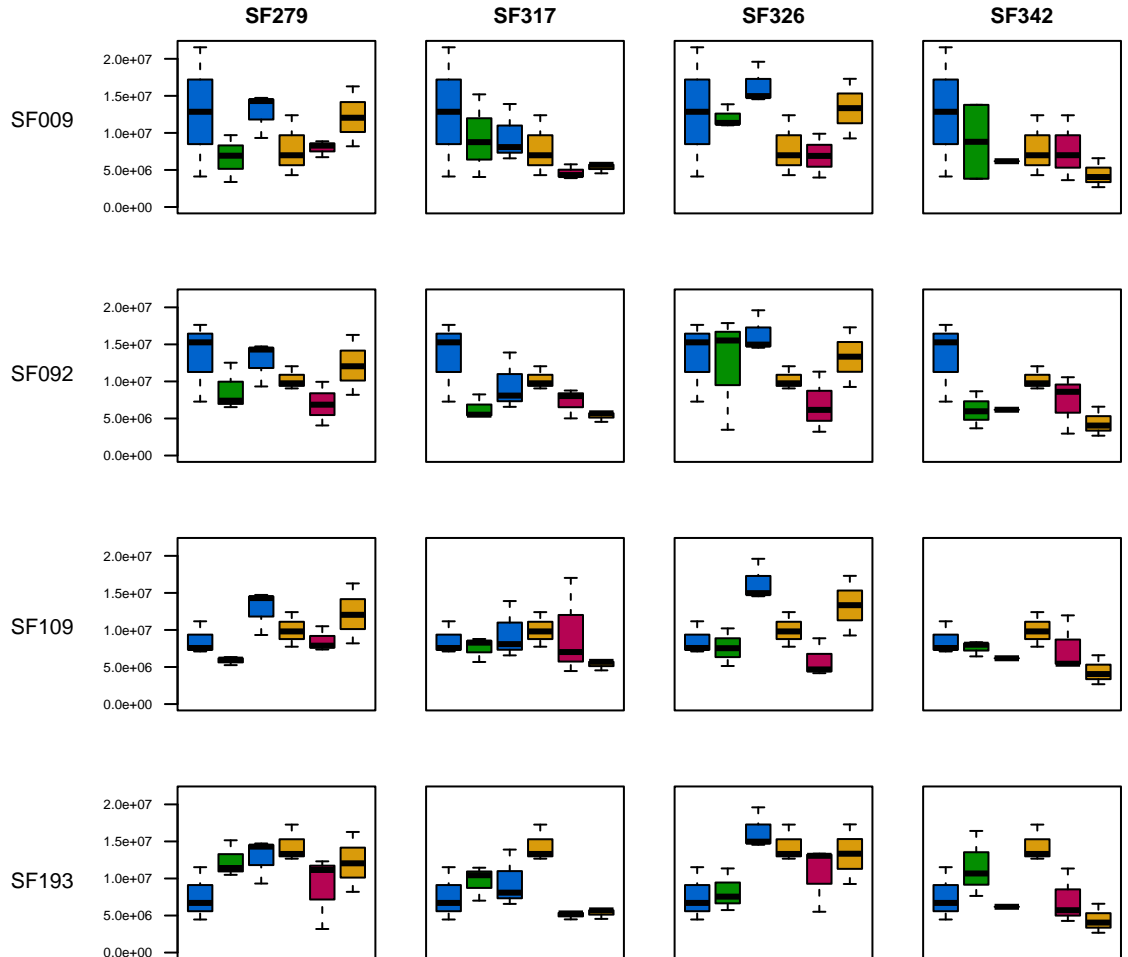

HanXRQChr06g0169891  
Probable phosphomannomutase

Parents WW  
Parents WD  
Hybrids WW  
Hybrids WD

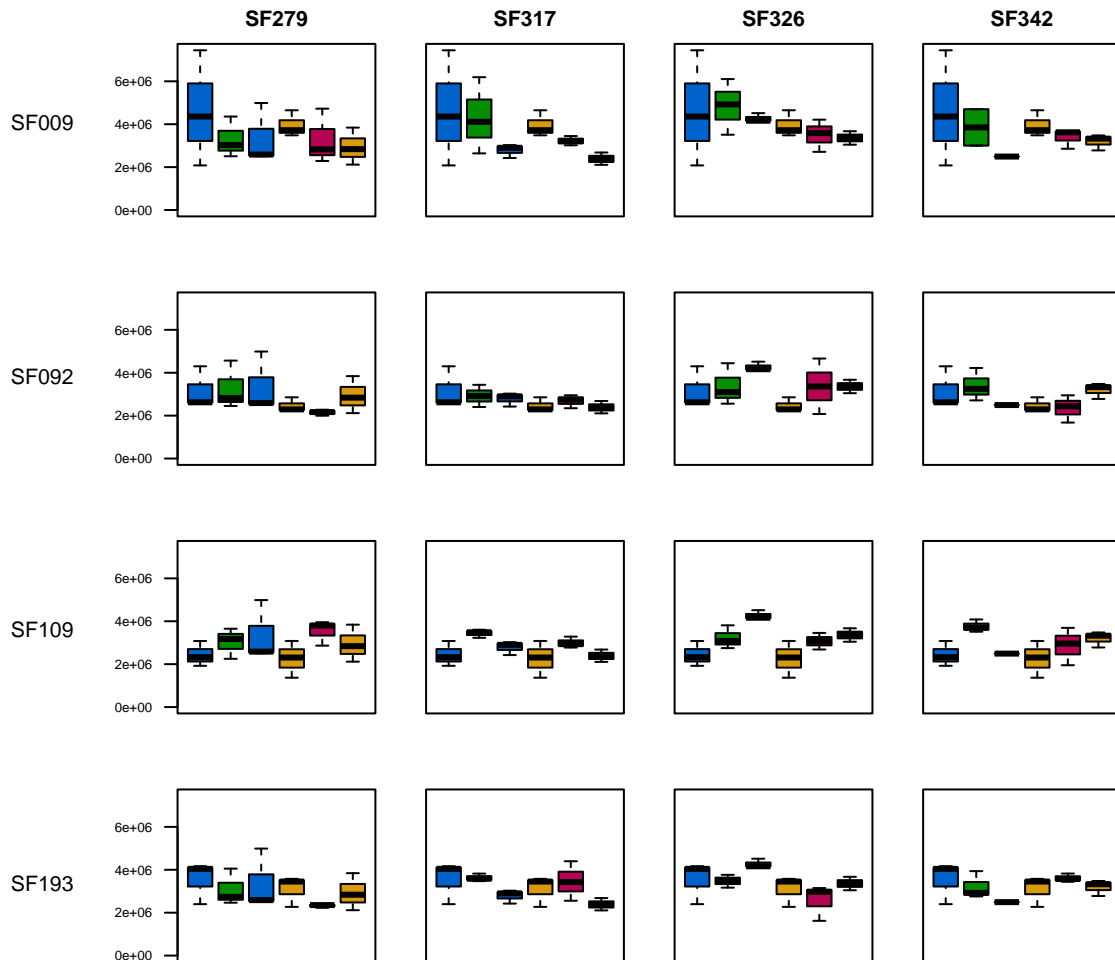

HanXRQChr11g0340641  
Putative NAD(P)-binding domain

Parents WW  
Parents WD  
Hybrids WW  
Hybrids WD

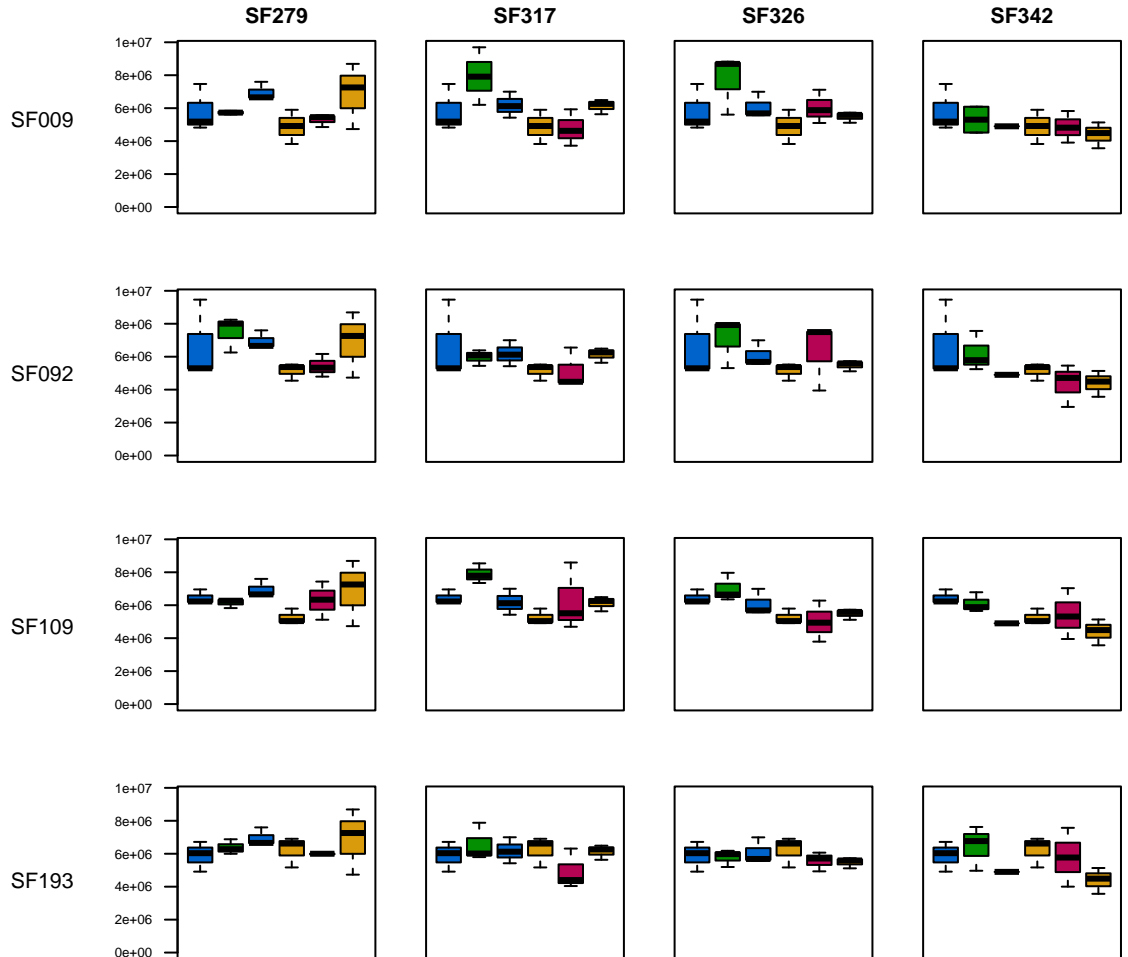



HanXRQChr05g0149811  
Probable membrane-associated 30 kDa  
protein, chloroplastic

Parents WW  
Parents WD  
Hybrids WW  
Hybrids WD

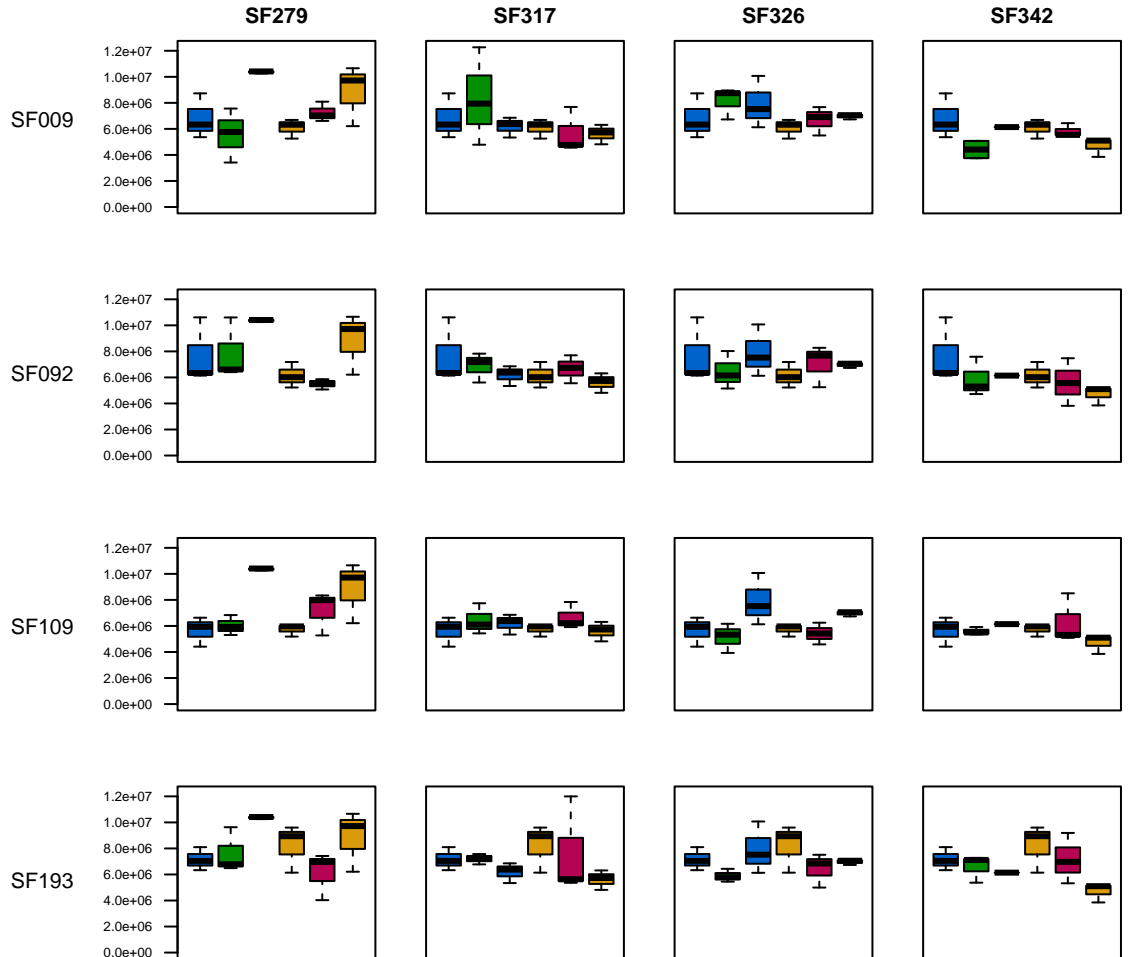

HanXRQChr11g0336221  
Probable RNA-binding protein 45A

Parents WW  
Parents WD  
Hybrids WW  
Hybrids WD

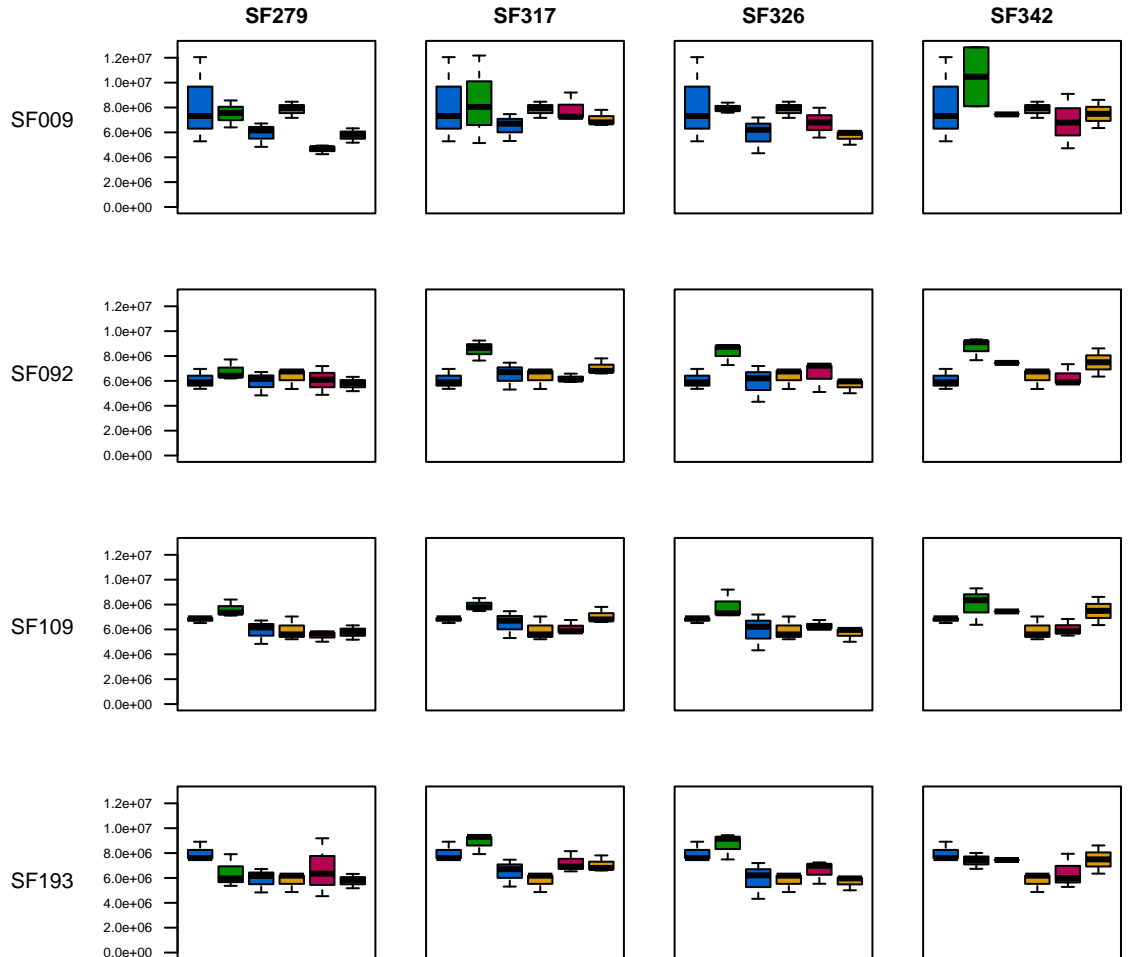

HanXRQChr08g0214241  
Putative ribosomal protein PSRP-3/Ycf65

- Parents WW
- Parents WD
- Hybrids WW
- Hybrids WD

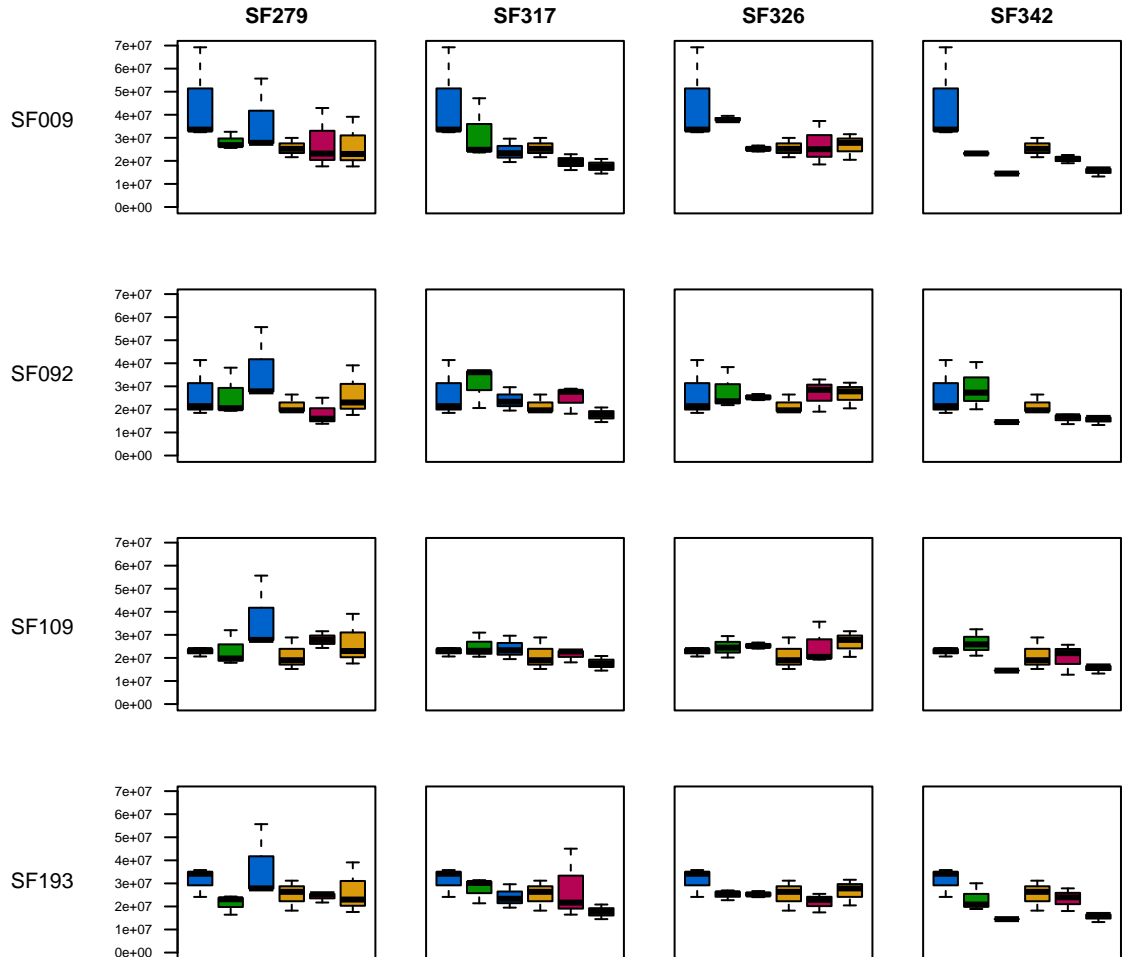

HanXRQChr03g0090501  
Probable 40S ribosomal protein S5

Parents WW  
Parents WD  
Hybrids WW  
Hybrids WD

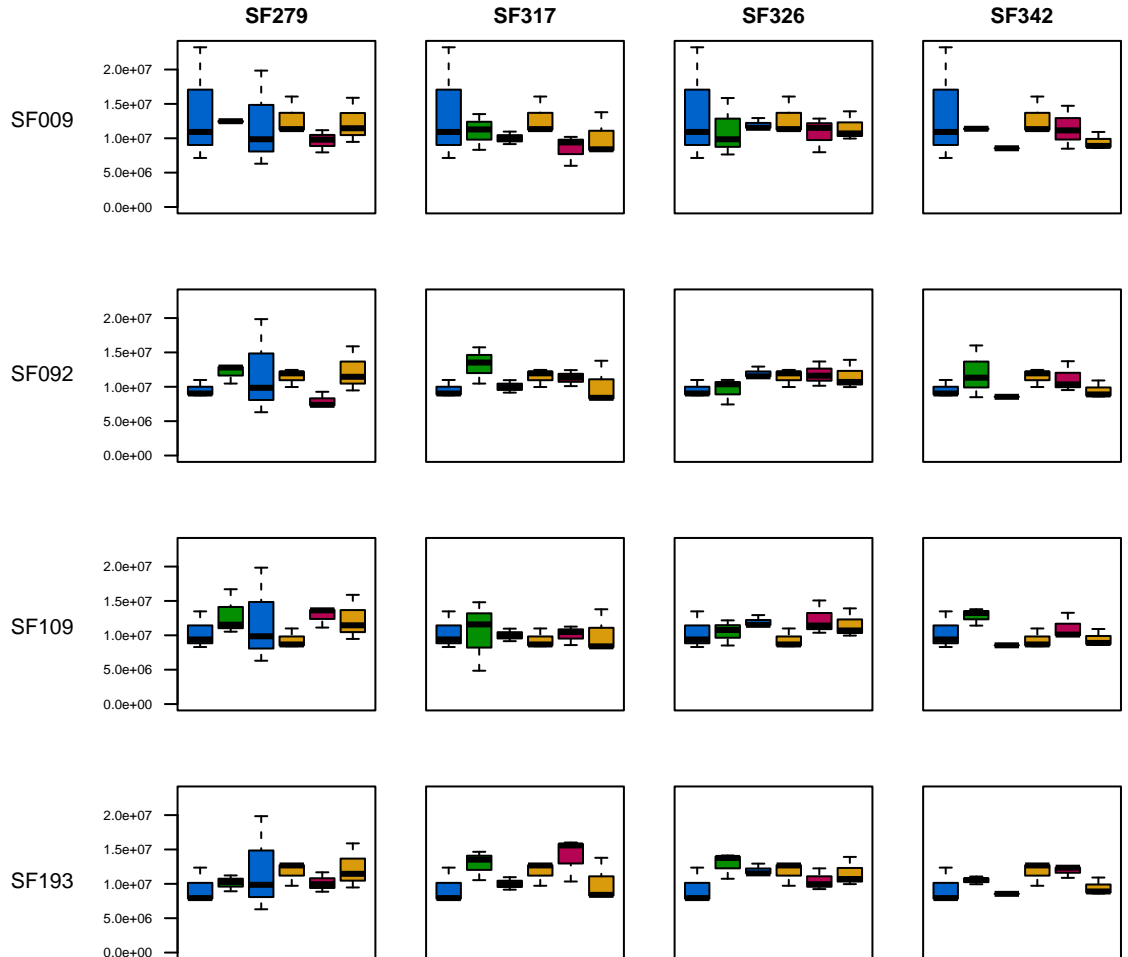

HanXRQChr12g0355041  
Putative thioredoxin-like fold

Parents WW  
Parents WD  
Hybrids WW  
Hybrids WD

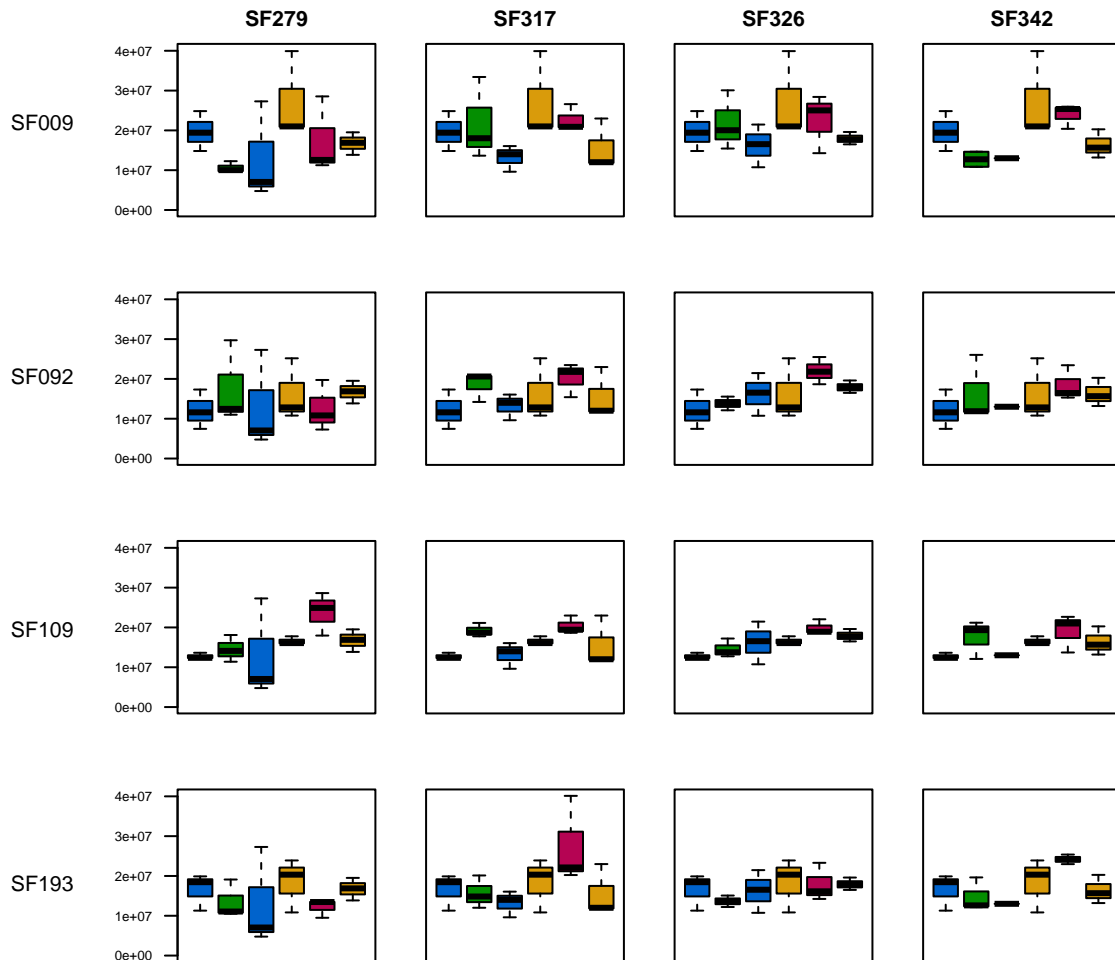

HanXRQChr17g0534831  
 Probable nucleoside diphosphate kinase  
 family protein

Parents WW  
 Parents WD  
 Hybrids WW  
 Hybrids WD

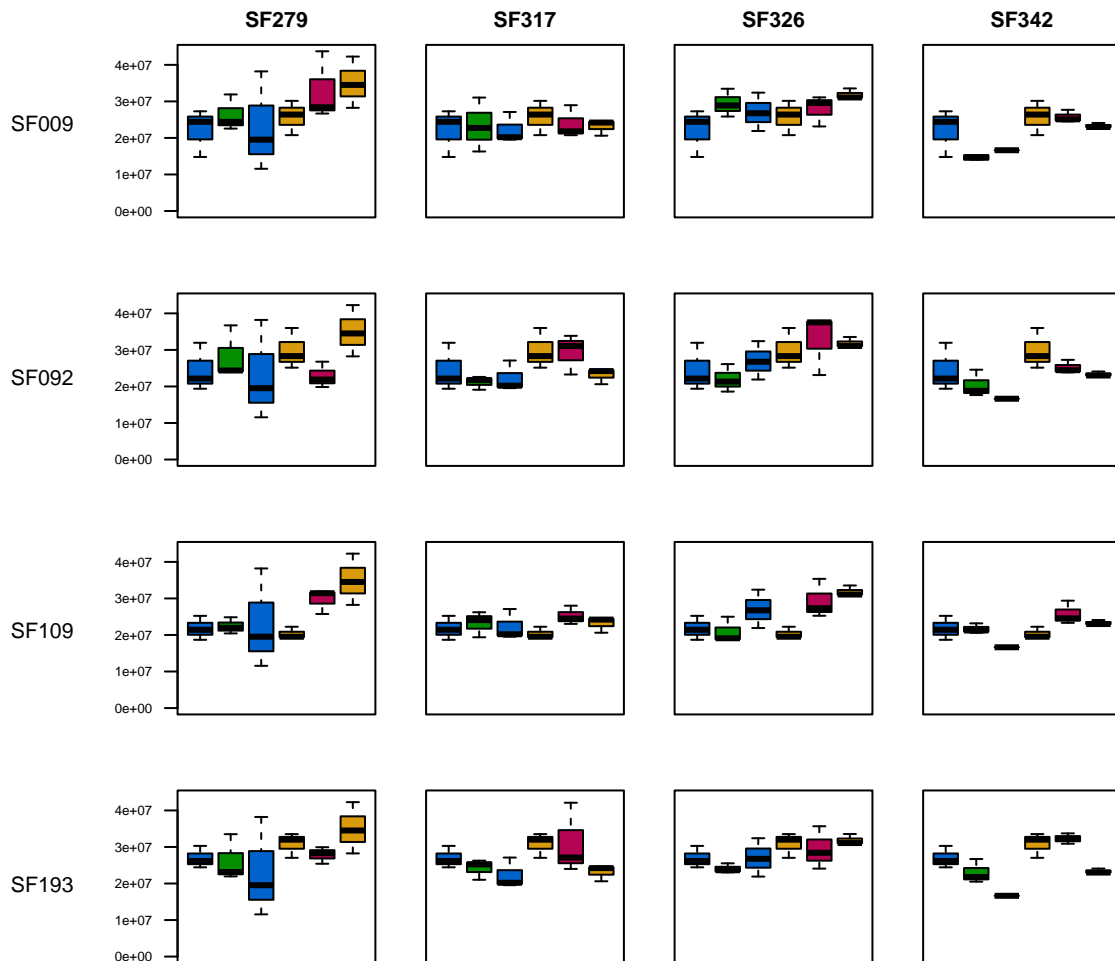

HanXRQChr15g0479701  
Probable 2-methylene-furan-3-one  
reductase

Parents WW  
Parents WD  
Hybrids WW  
Hybrids WD

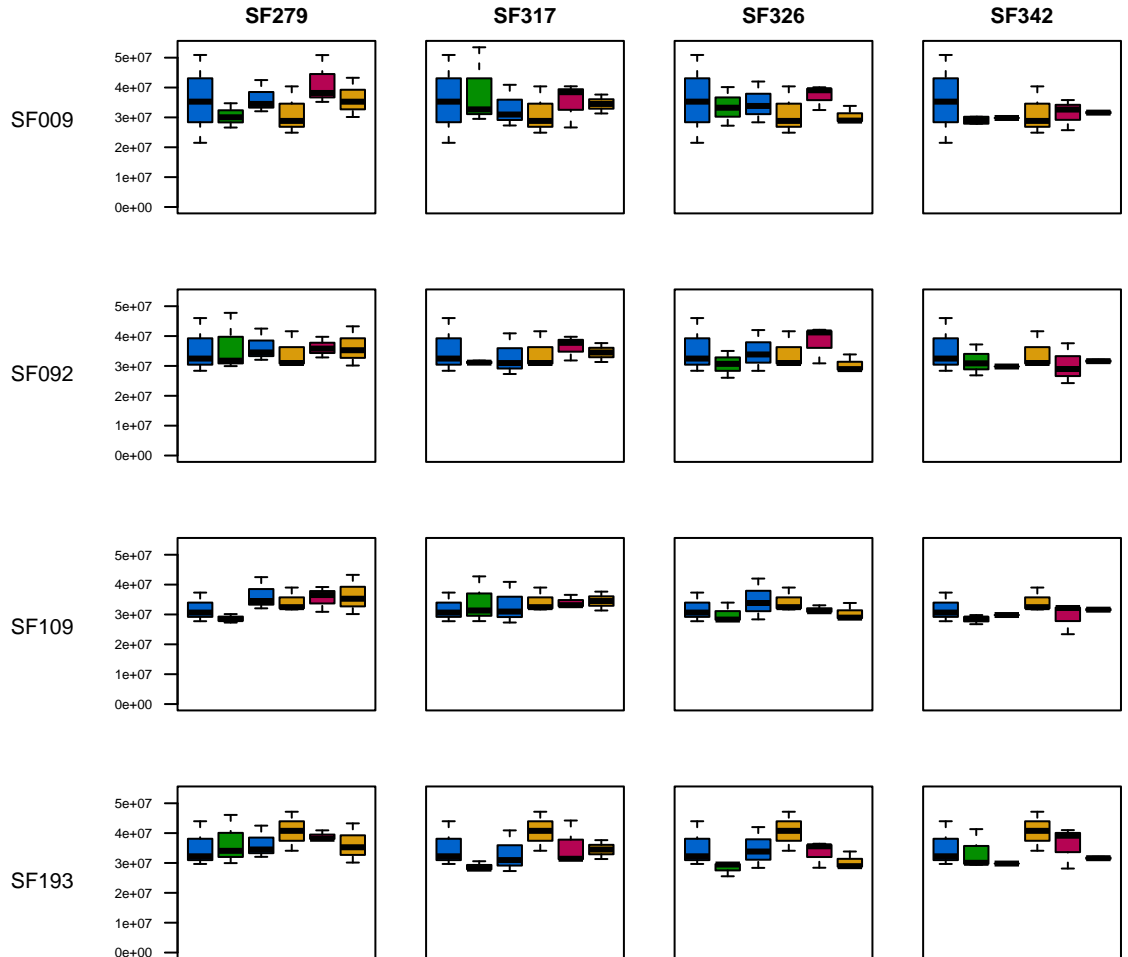

HanXRQChr09g0258391  
Putative thioredoxin; Thioredoxin-like  
fold

Parents WW  
Parents WD  
Hybrids WW  
Hybrids WD

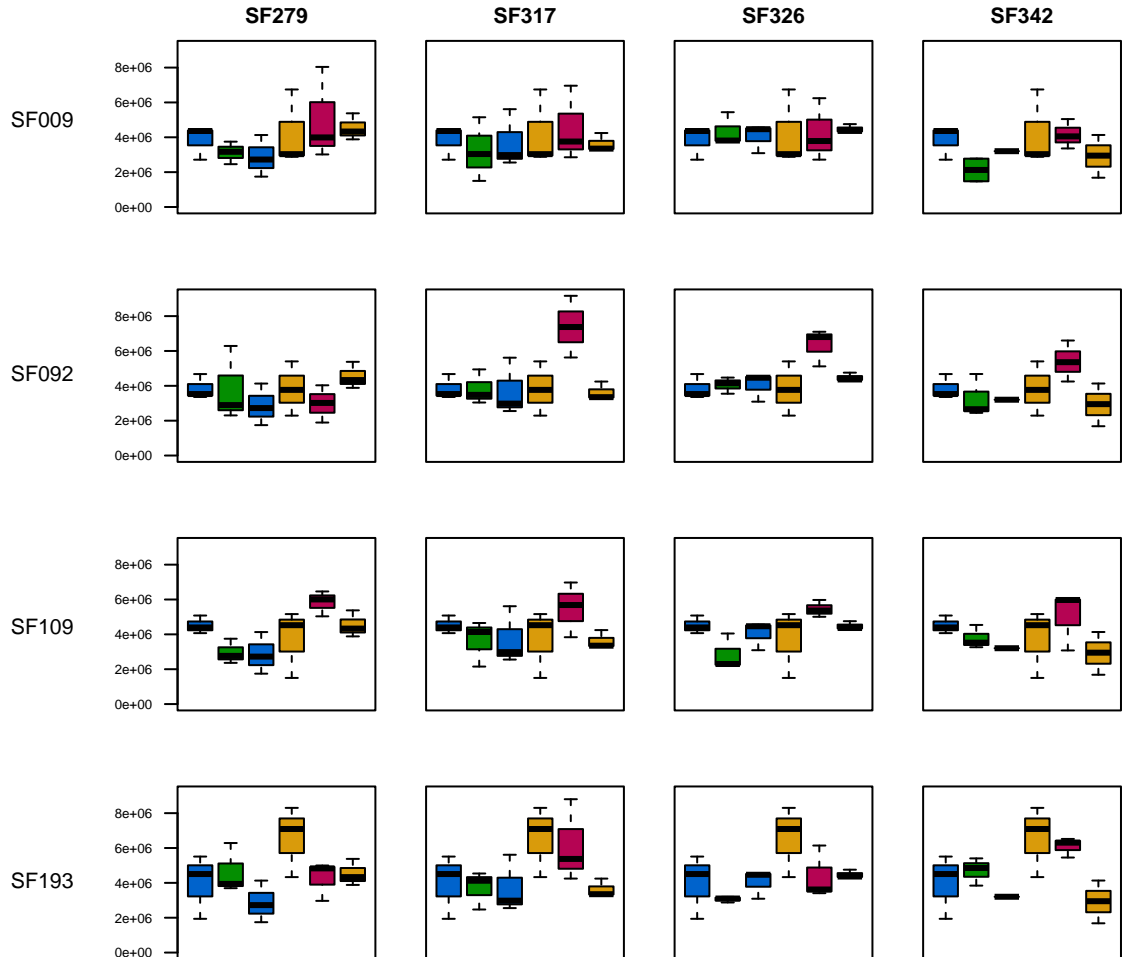



HanXRQChr06g0167341  
Putative SUF system FeS cluster  
assembly, SufBD

Parents WW  
Parents WD  
Hybrids WW  
Hybrids WD

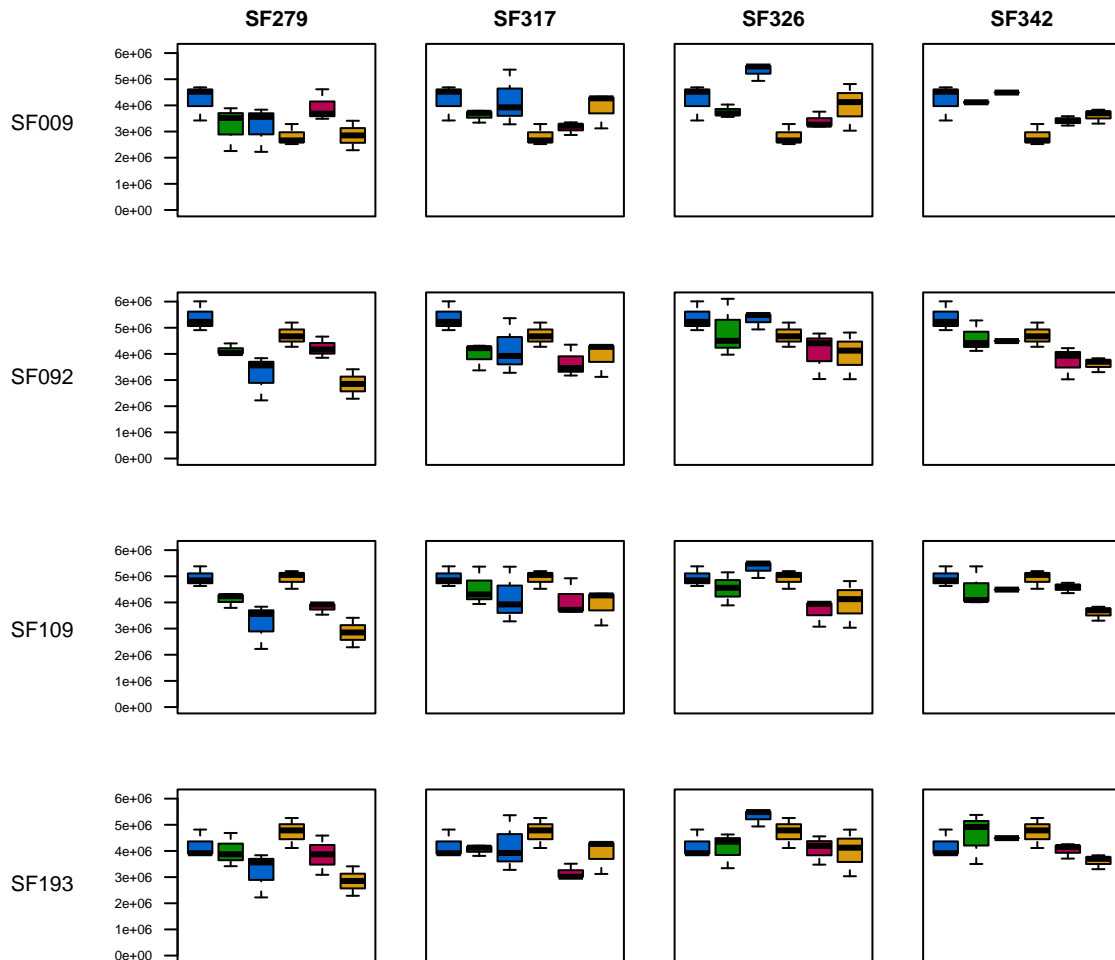

HanXRQChr16g0510391  
Putative proteasome alpha-subunit,  
N-terminal domain; Proteasome, subunit al

Parents WW  
Parents WD  
Hybrids WW  
Hybrids WD

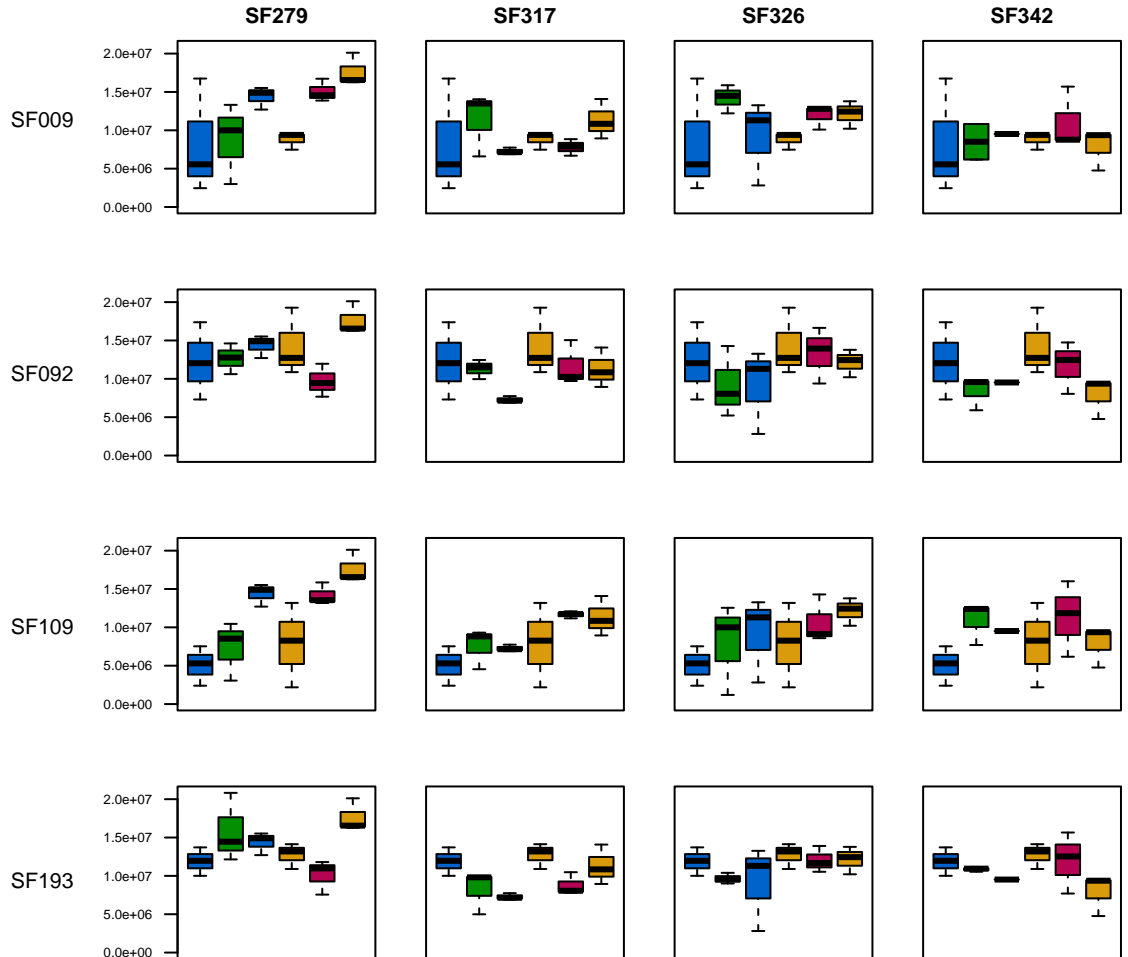

HanXRQChr13g0407051  
 Probable leucine-rich repeat (LRR)  
 family protein

Parents WW  
 Parents WD  
 Hybrids WW  
 Hybrids WD

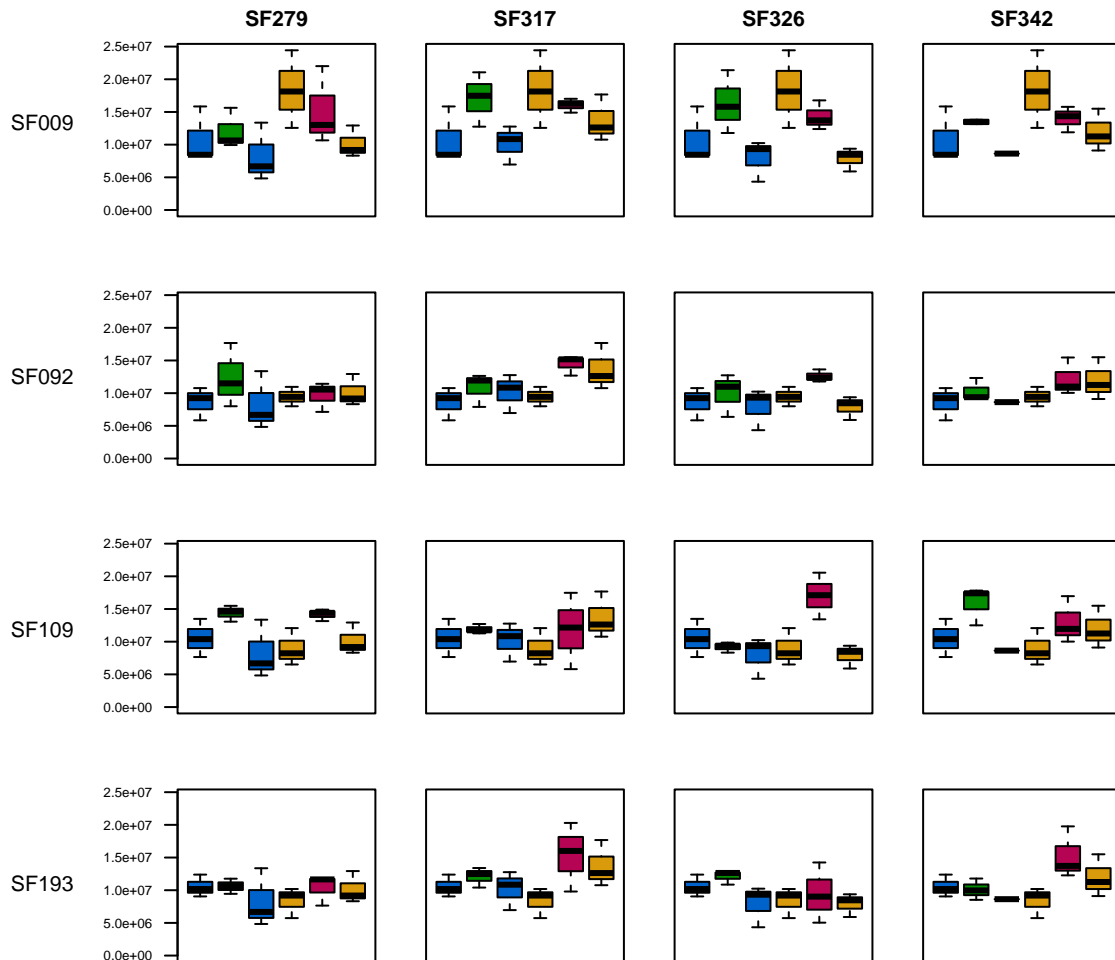

HanXRQChr04g0103951  
Putative aldolase-type TIM barrel

Parents WW  
Parents WD  
Hybrids WW  
Hybrids WD

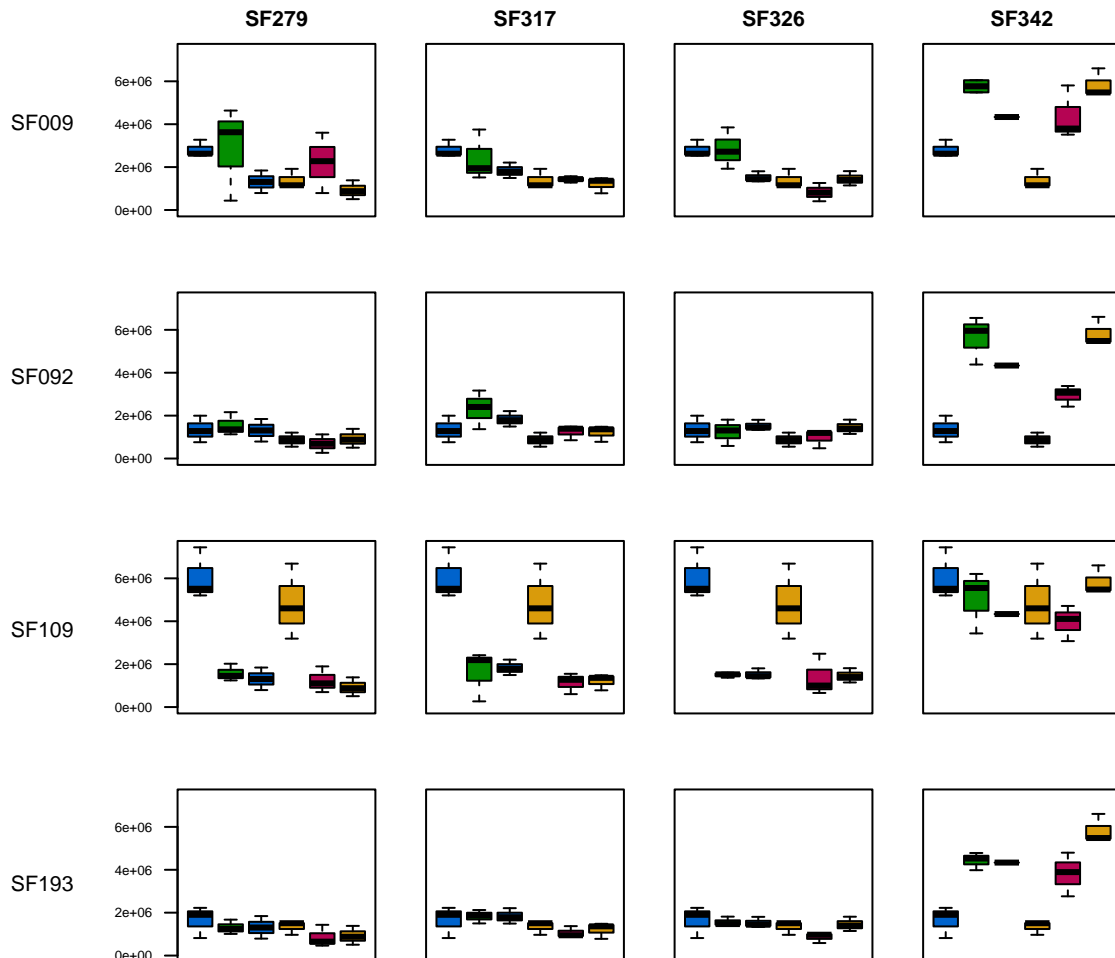

HanXRQChr02g0041131  
Putative FKBP-type peptidyl-polyl  
cis-trans isomerase domain; Peptidyl-proly

Parents WW  
Parents WD  
Hybrids WW  
Hybrids WD

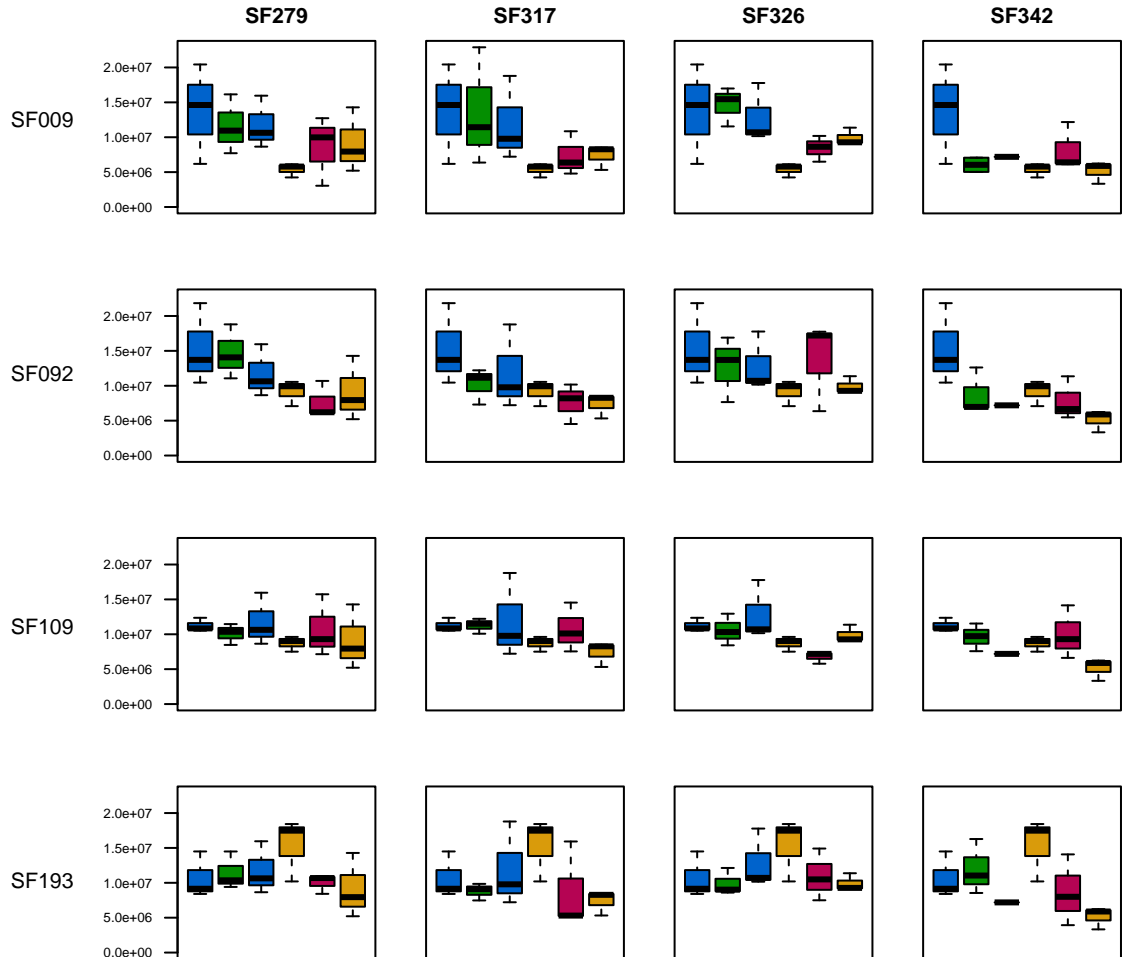

HanXRQChr08g0207321  
Uncharacterized conserved protein

- Parents WW
- Parents WD
- Hybrids WW
- Hybrids WD

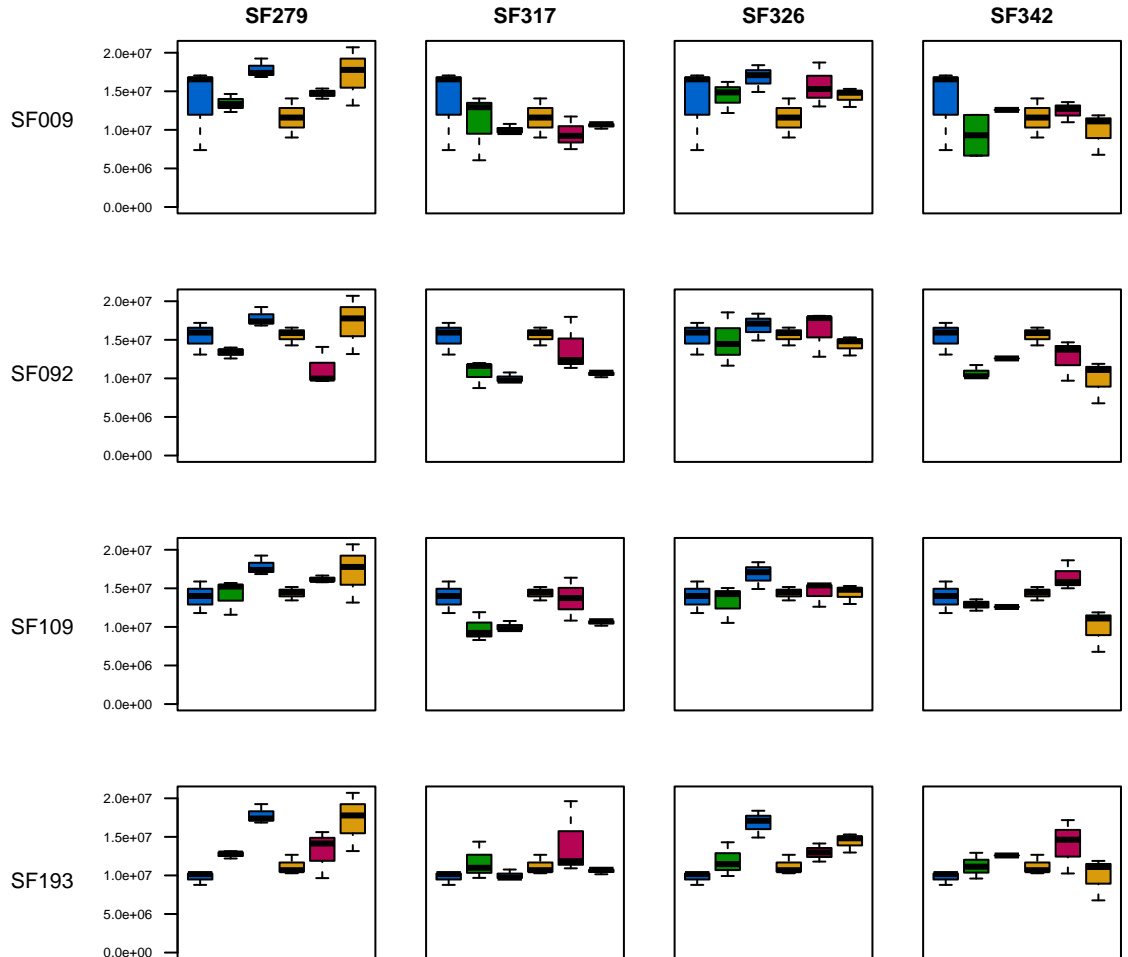

HanXRQChr09g0245891  
Probable proteasome subunit PAB1

Parents WW  
Parents WD  
Hybrids WW  
Hybrids WD

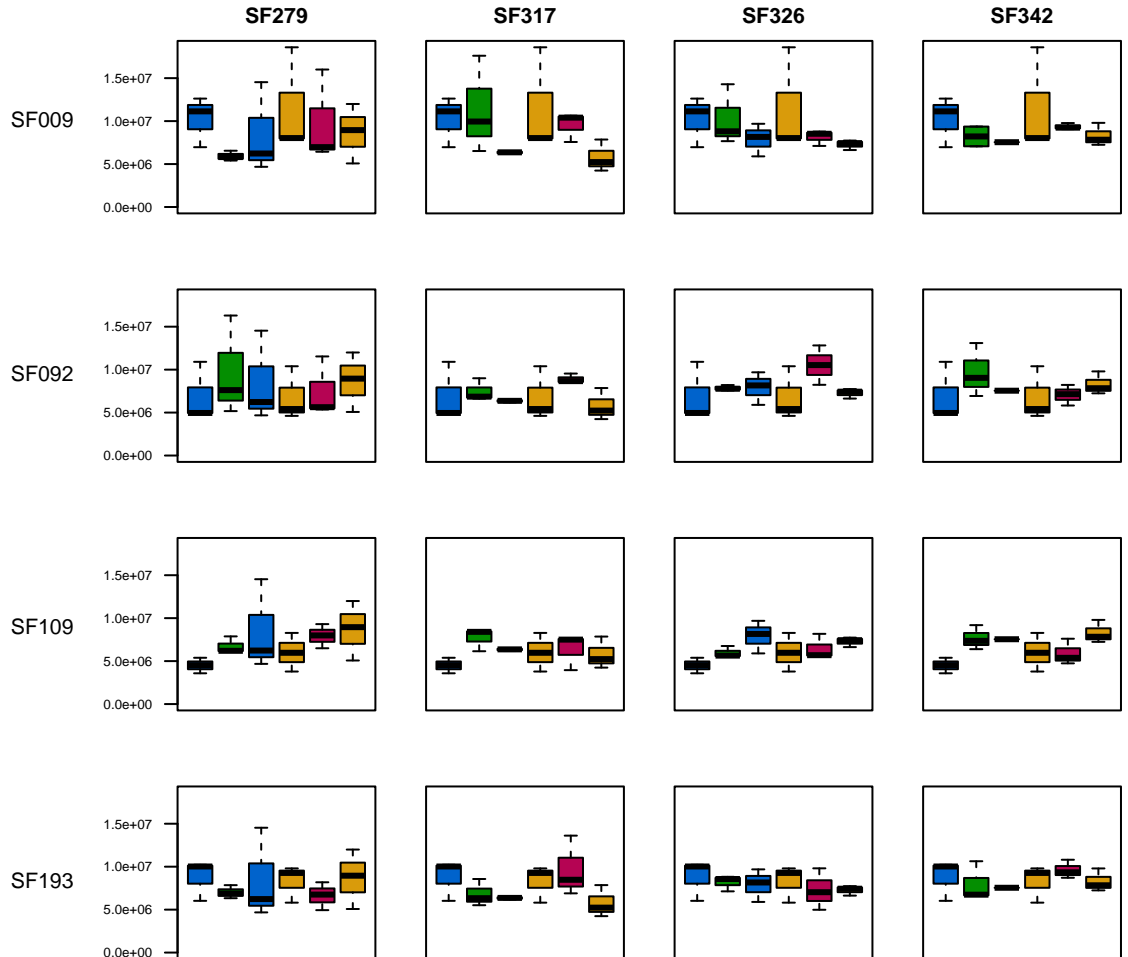

HanXRQChr14g0444641  
Probable NADH-ubiquinone oxidoreductase  
75 kDa subunit, mitochondrial EC=1.6.99.3

Parents WW  
Parents WD  
Hybrids WW  
Hybrids WD

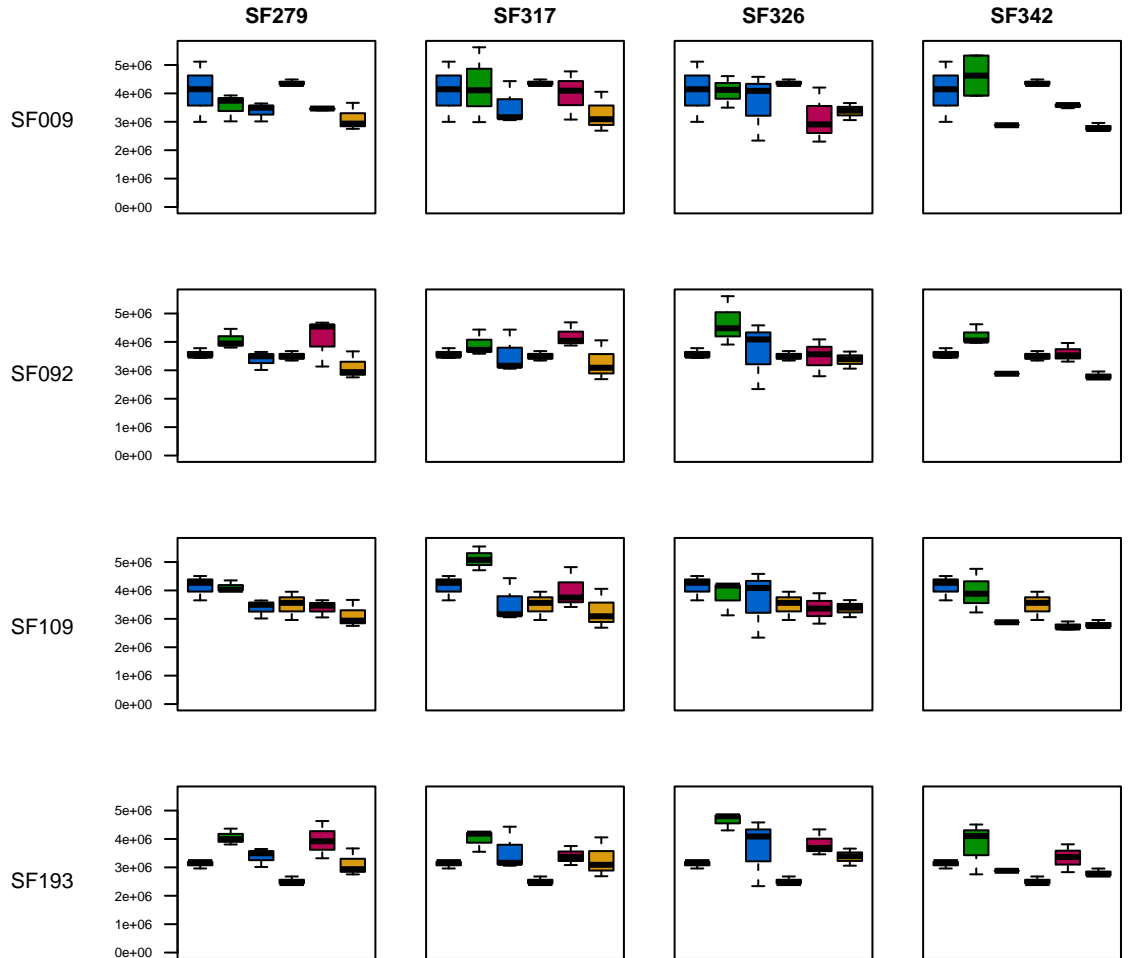



HanXRQChr15g0492101  
Putative dihydroorotate dehydrogenase  
domain; Aldolase-type TIM barrel

Parents WW  
Parents WD  
Hybrids WW  
Hybrids WD

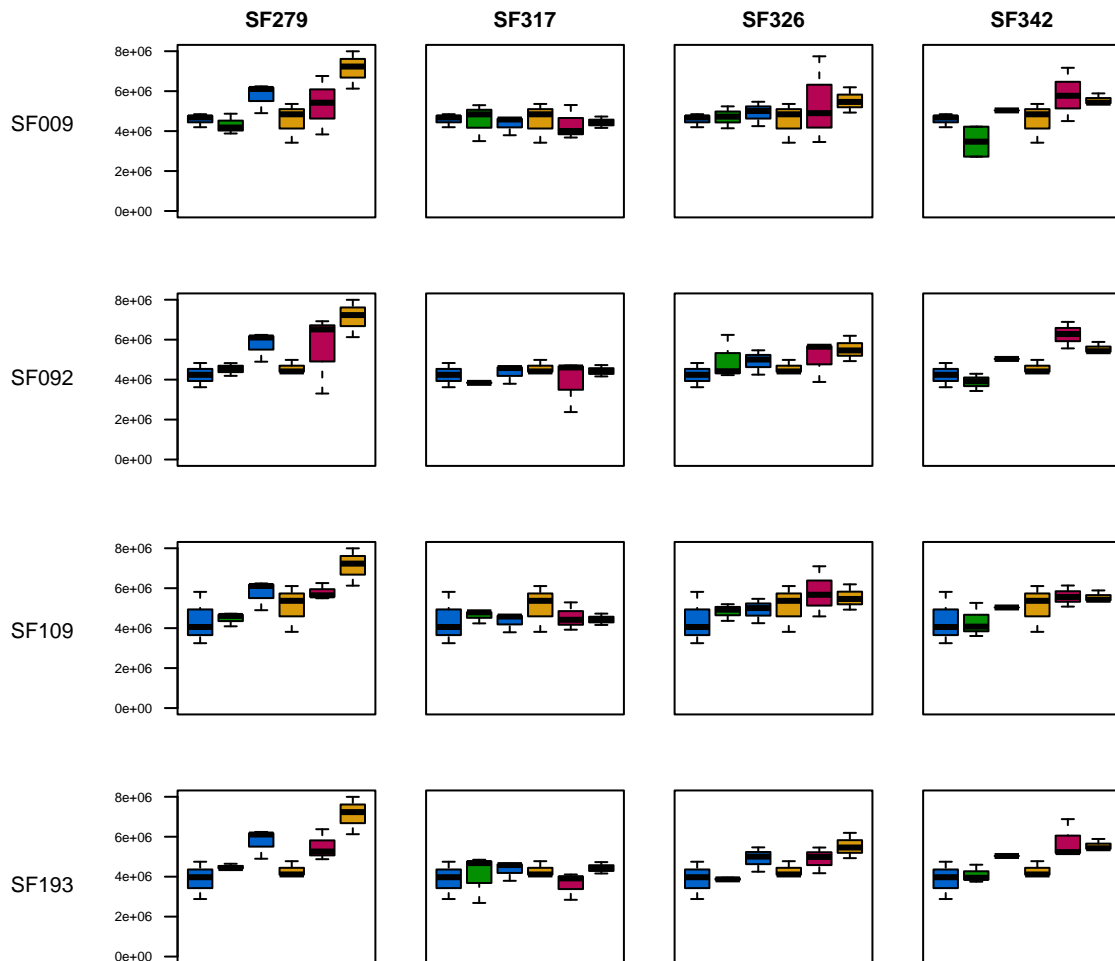

HanXRQChr07g0202161  
Probable lysyl-tRNA synthetase 1

- Parents WW
- Parents WD
- Hybrids WW
- Hybrids WD

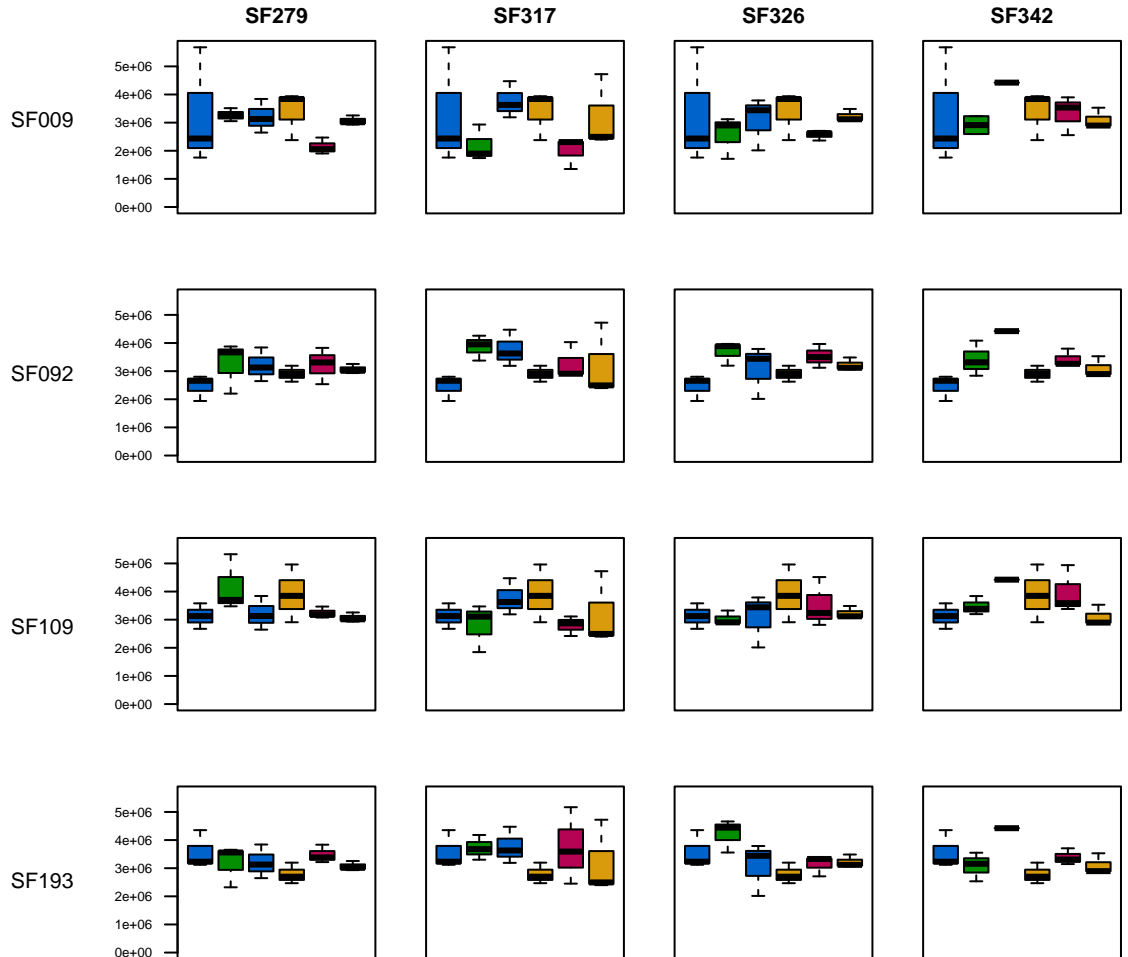

HanXRQChr04g0110491  
Probable ribophorin II (RPN2) family  
protein

Parents WW  
Parents WD  
Hybrids WW  
Hybrids WD

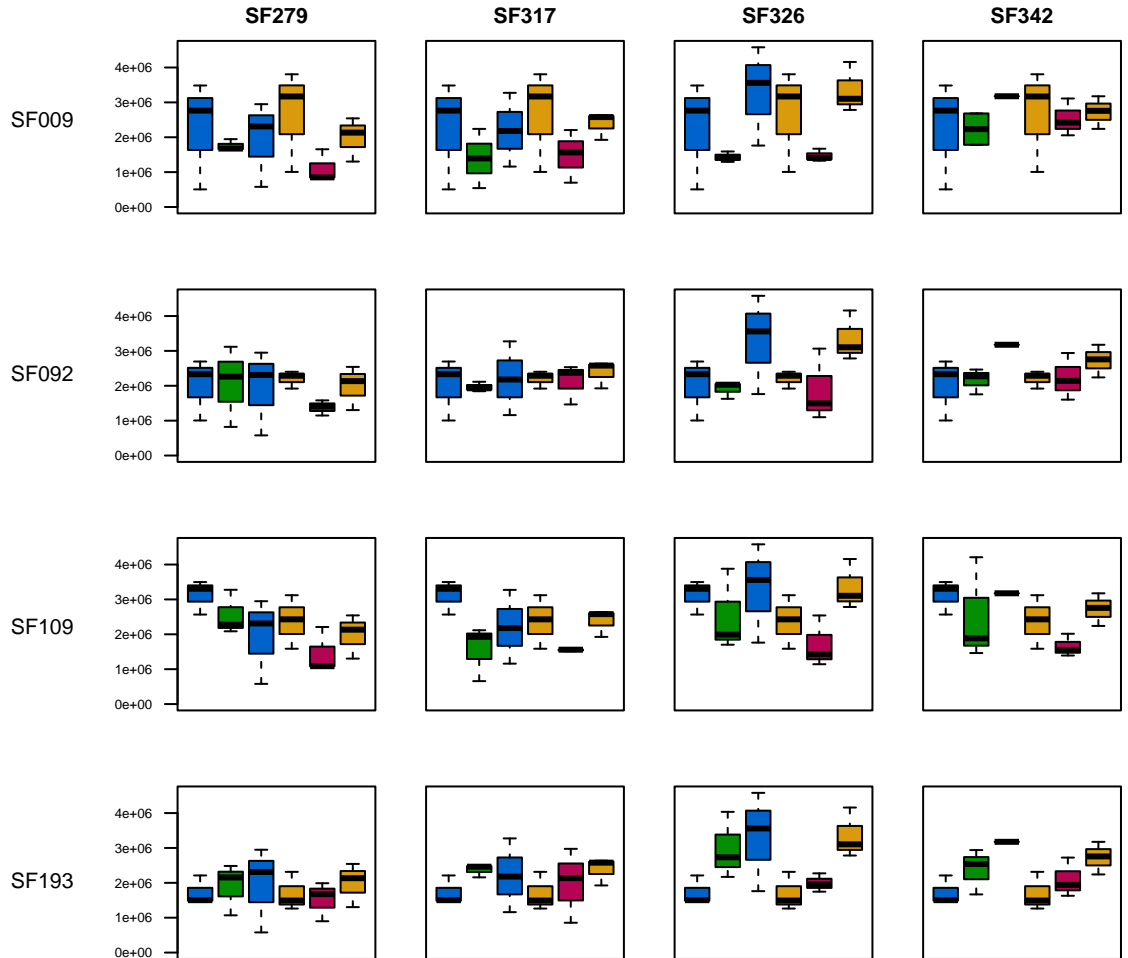

HanXRQChr02g0046191  
Probable mannosylglycoprotein  
endo- $\beta$ -mannosidase

Parents WW  
Parents WD  
Hybrids WW  
Hybrids WD

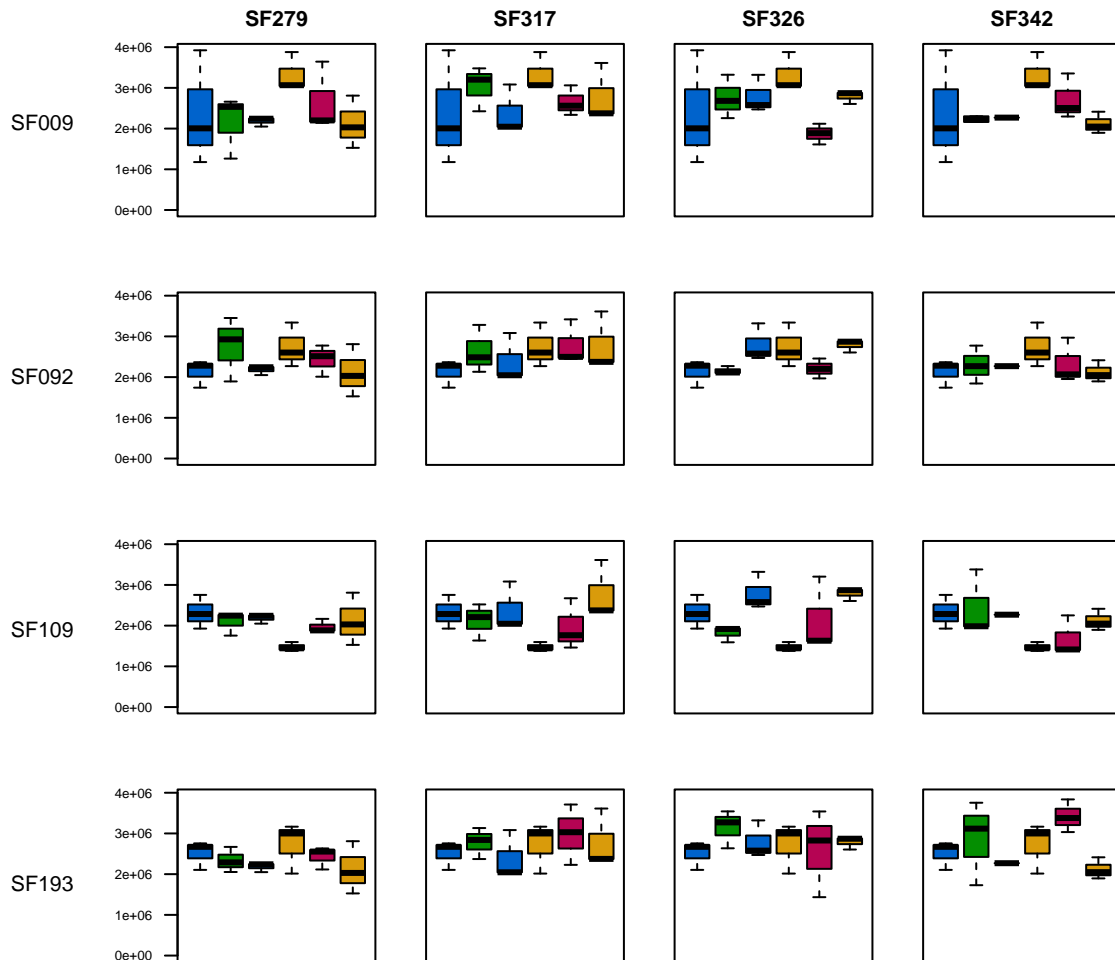

HanXRQChr17g0567741  
Probable serine carboxypeptidase S28  
family protein

Parents WW  
Parents WD  
Hybrids WW  
Hybrids WD

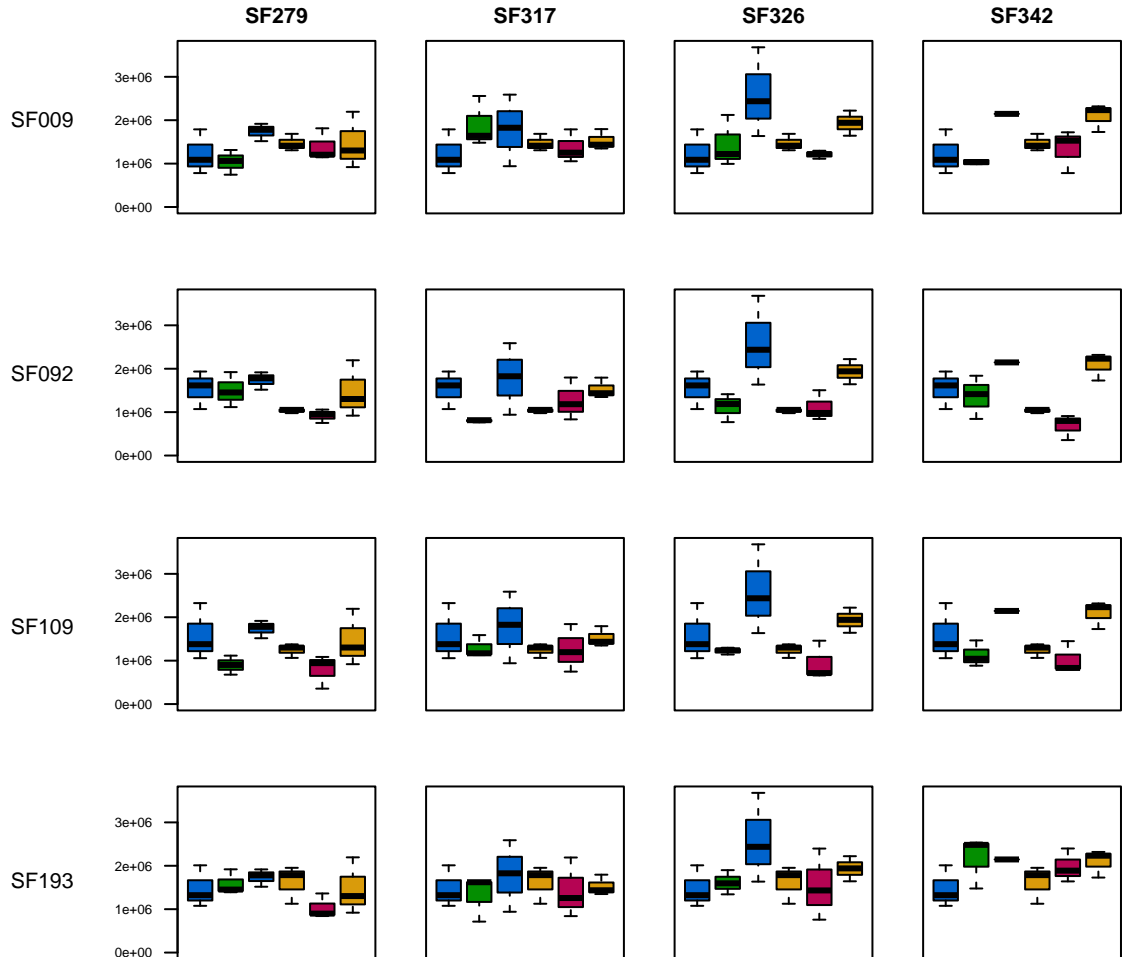

HanXRQChr17g0541921  
Probable 26S proteasome regulatory  
subunit S2 1A

Parents WW  
Parents WD  
Hybrids WW  
Hybrids WD

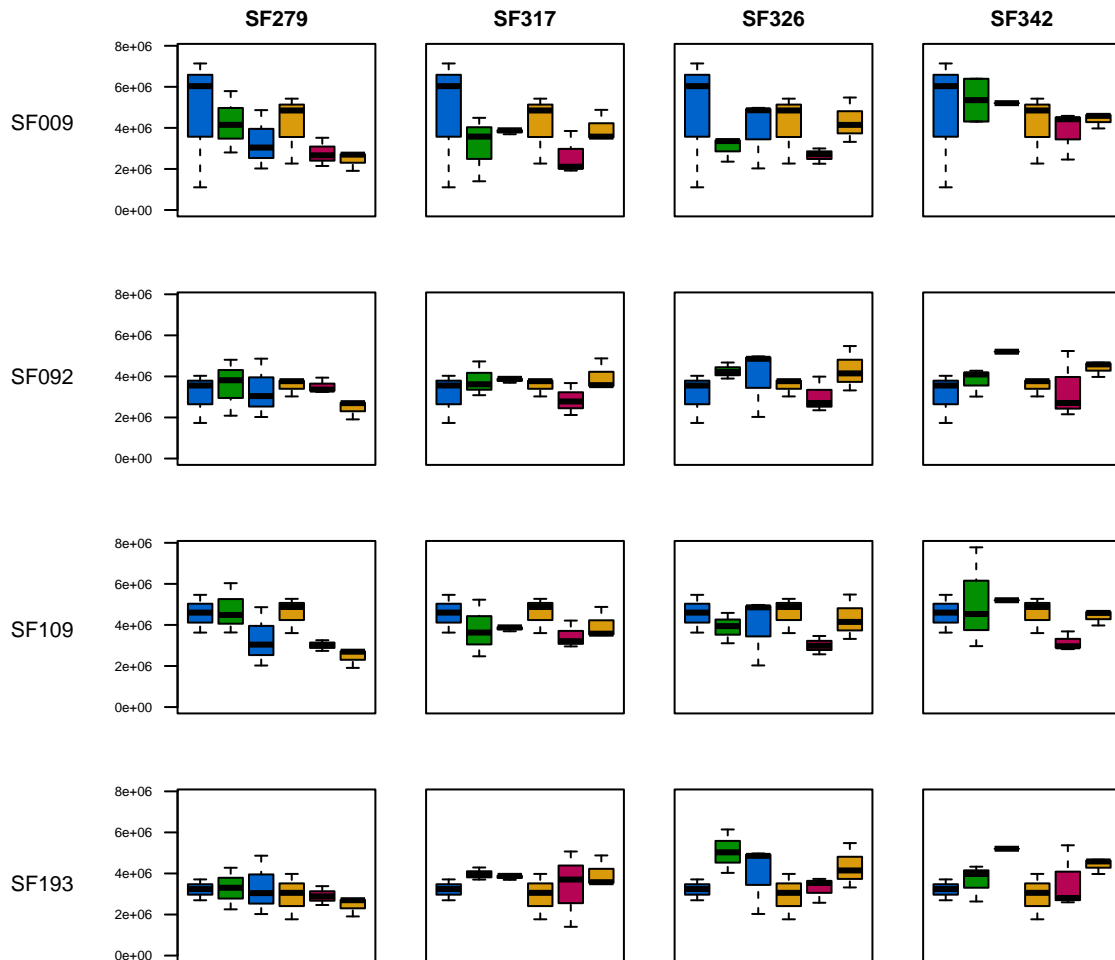

HanXRQChr10g0301751  
Probable presequence protease 2

Parents WW  
Parents WD  
Hybrids WW  
Hybrids WD

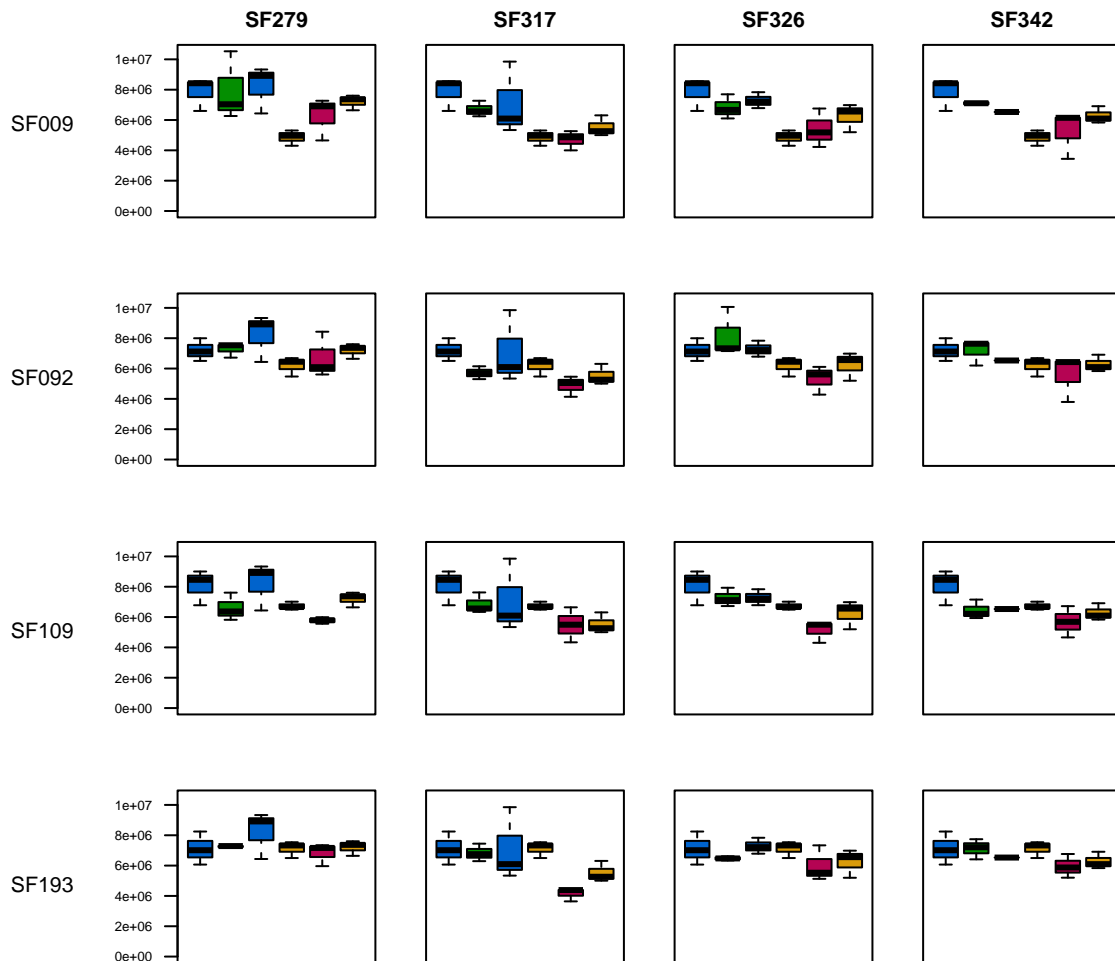

HanXRQChr14g0437491  
 Probable putative mitochondrial  
 2-oxoglutarate/malate carrier protein

Parents WW  
 Parents WD  
 Hybrids WW  
 Hybrids WD

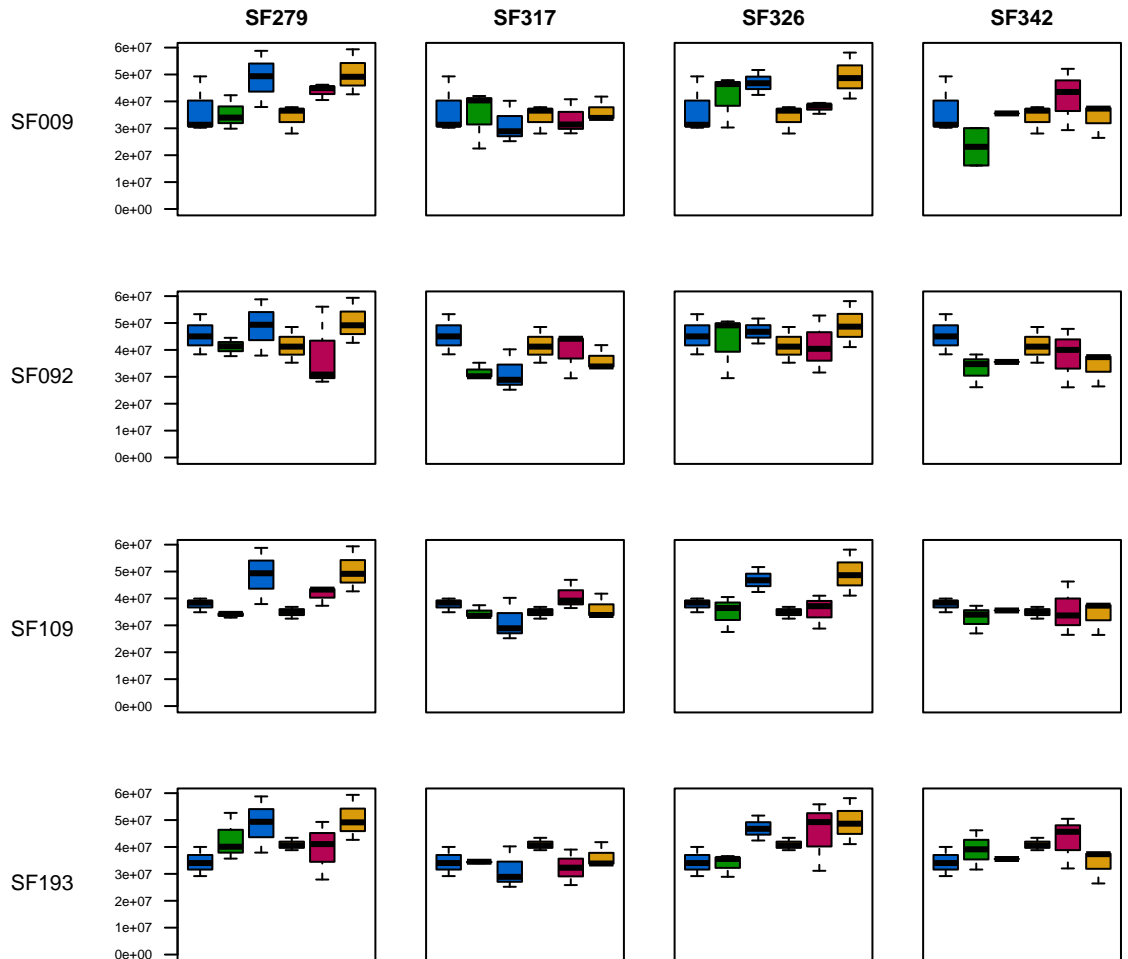



HanXRQChr05g0153181  
Putative histone H5

Parents WW  
Parents WD  
Hybrids WW  
Hybrids WD

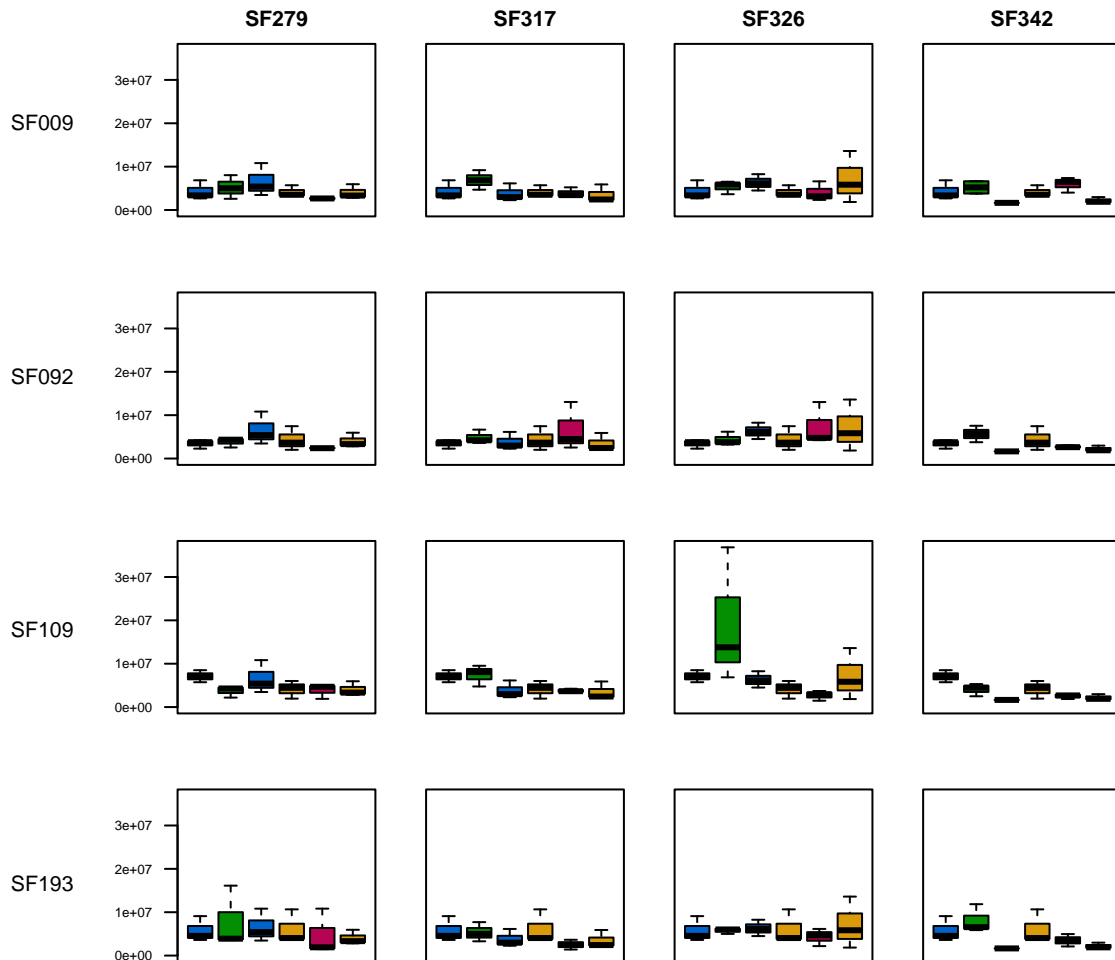

HanXRQChr06g0164571  
Probable translation elongation factor  
EF1B/ribosomal protein S6 family protein

Parents WW  
Parents WD  
Hybrids WW  
Hybrids WD

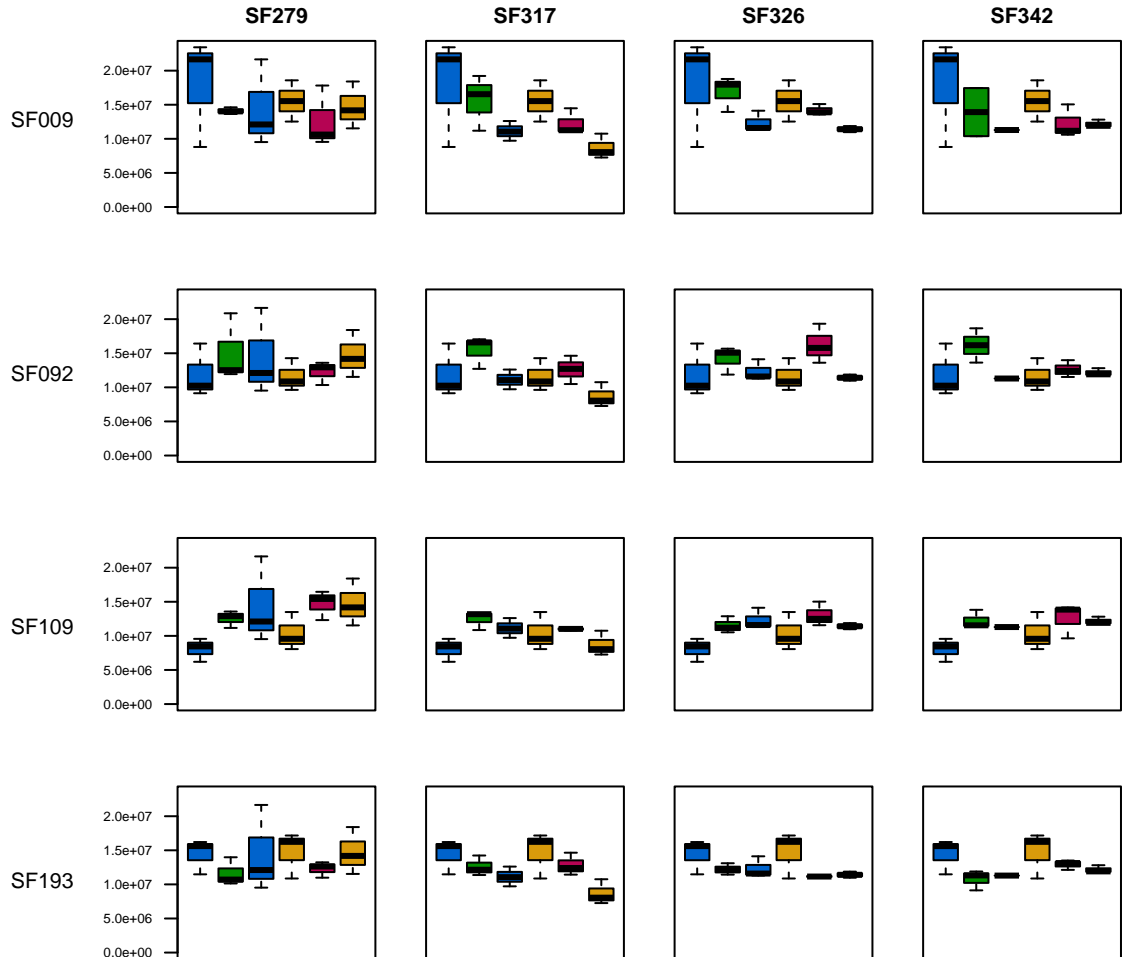

HanXRQChr02g0041231  
Probable oxidoreductase family protein

Parents WW  
Parents WD  
Hybrids WW  
Hybrids WD

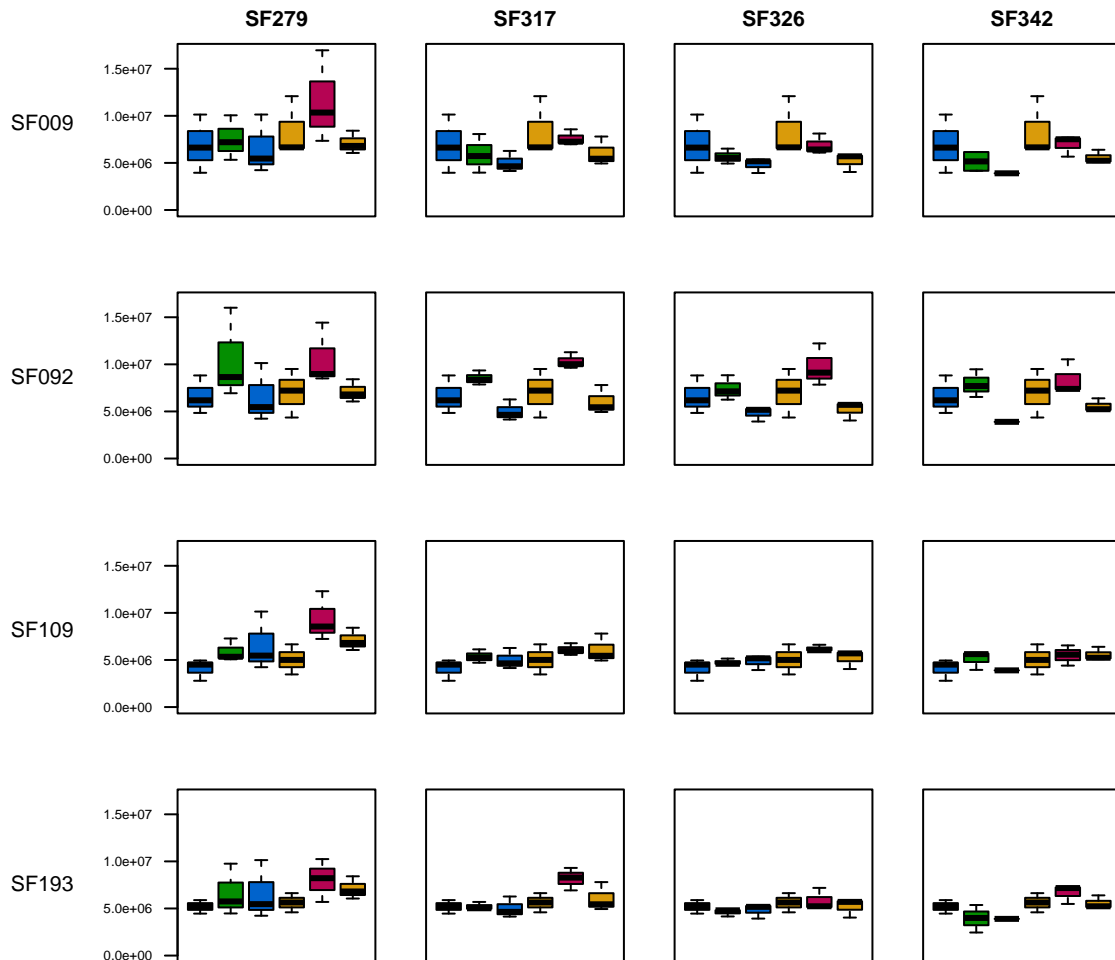

HanXRQChr12g0378221  
 Probable myo-inositol monophosphatase  
 like 1

Parents WW  
 Parents WD  
 Hybrids WW  
 Hybrids WD

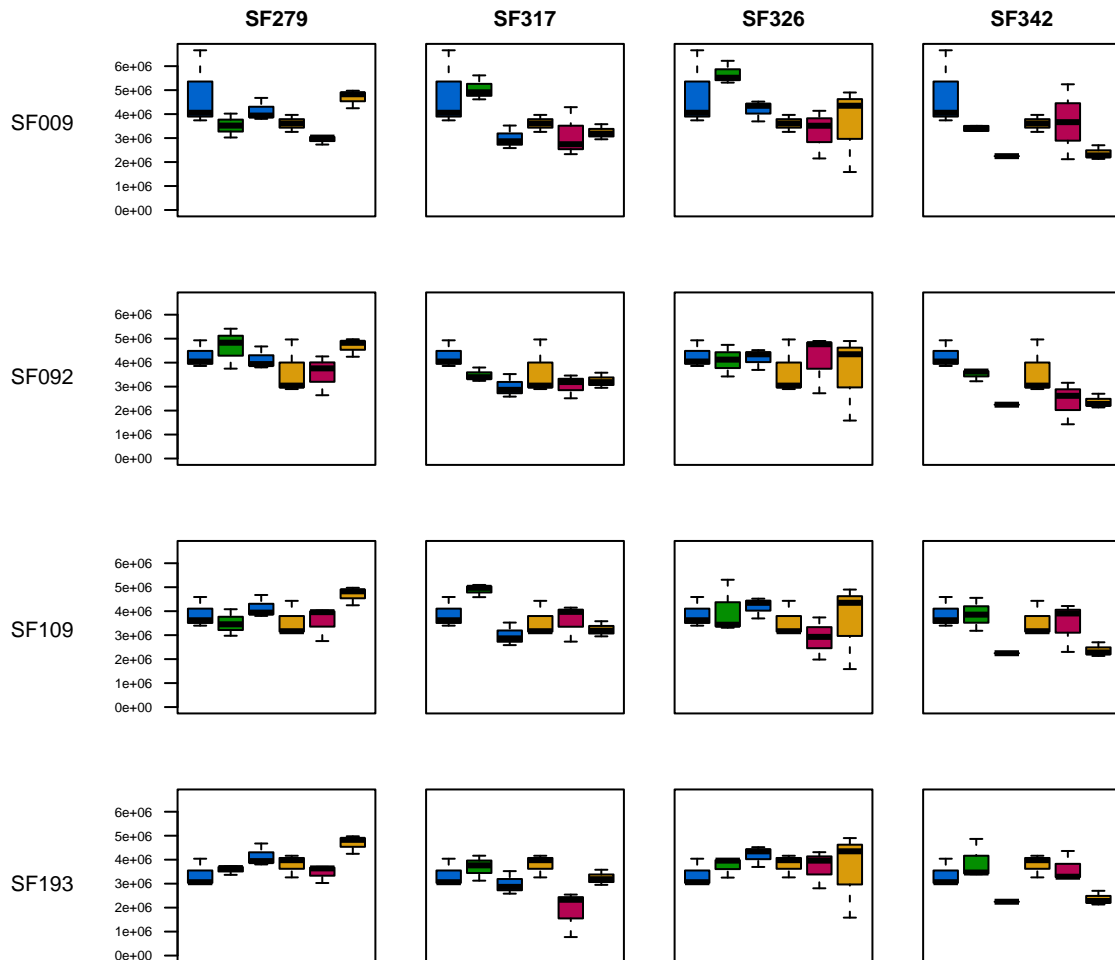

HanXRQChr14g0459921  
 Probable  
 sedoheptulose-1,7-bisphosphatase, chloro

Parents WW  
 Parents WD  
 Hybrids WW  
 Hybrids WD

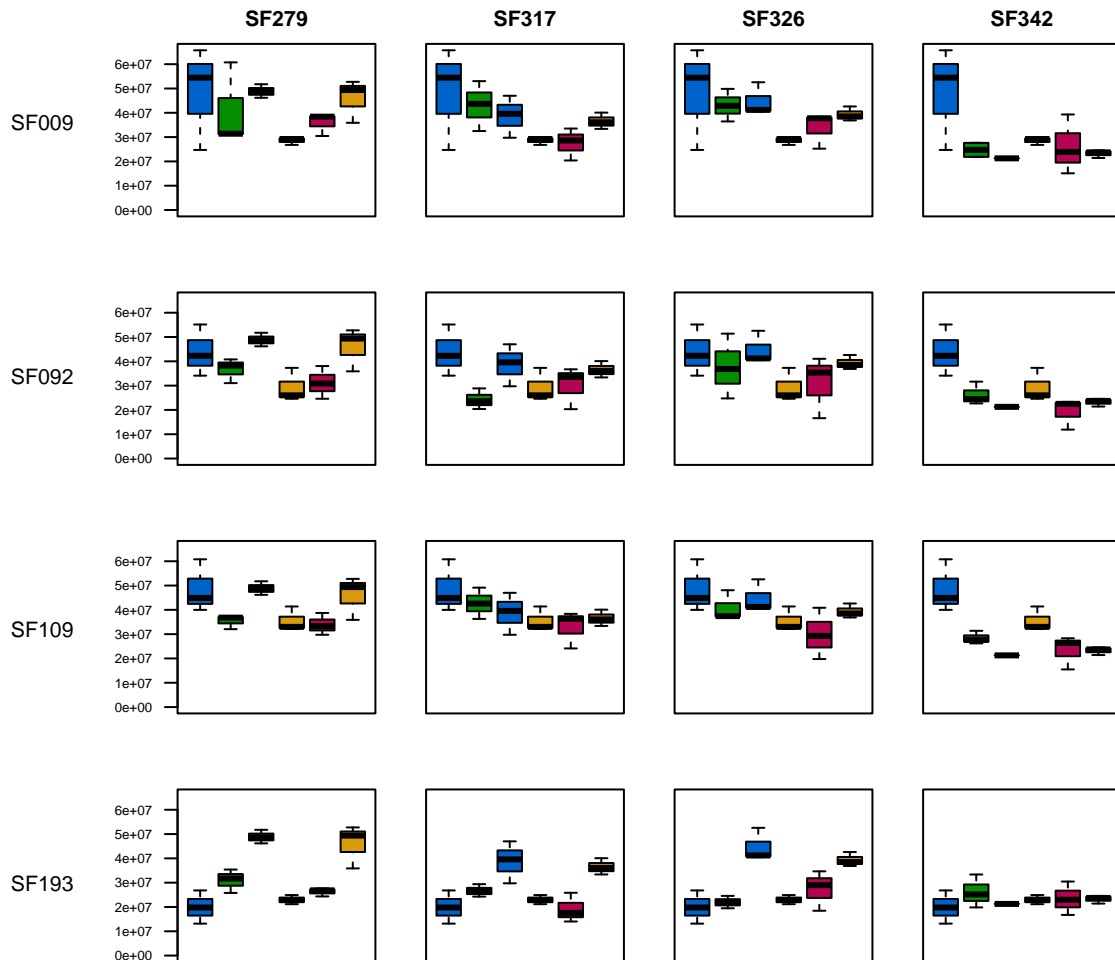

HanXRQChr16g0515011  
Putative RNA recognition motif domain,  
eukaryote; Polyadenylate binding protein, h

Parents WW  
Parents WD  
Hybrids WW  
Hybrids WD

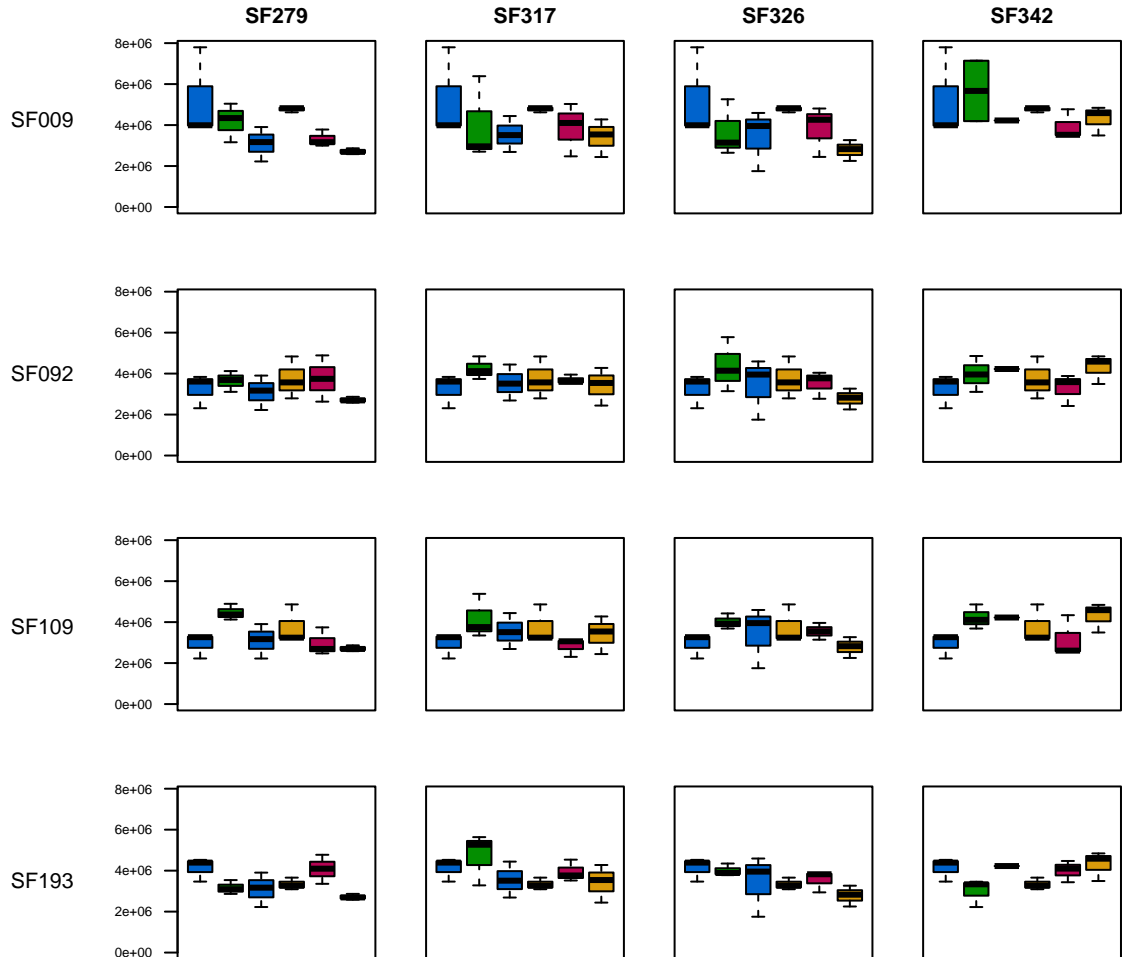

HanXRQChr17g0559211  
Putative ATPase, AAA-type, core;  
Peptidase, FtsH; P-loop containing nucleos

Parents WW  
Parents WD  
Hybrids WW  
Hybrids WD

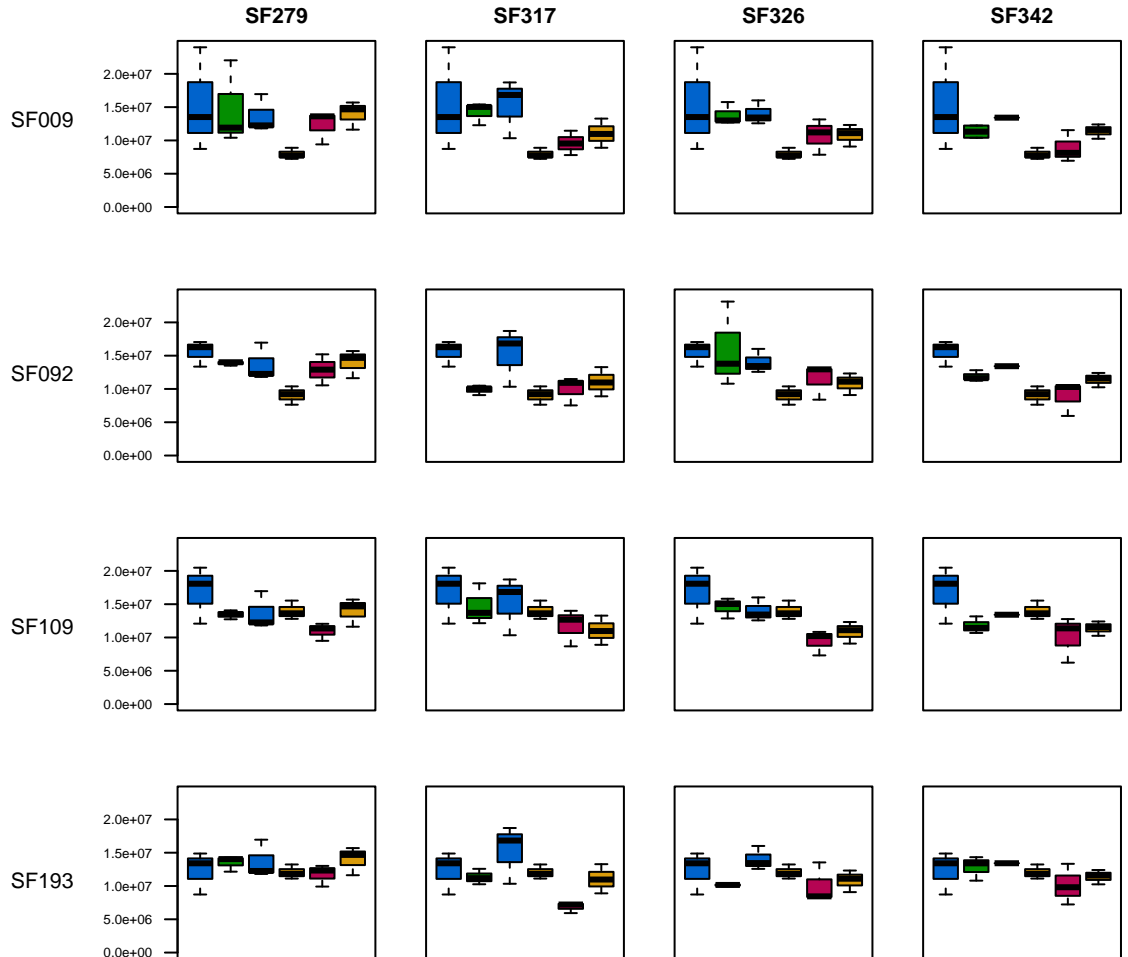

HanXRQChr07g0191971  
Probable mitochondrial outer membrane  
protein porin of 36 kDa

Parents WW  
Parents WD  
Hybrids WW  
Hybrids WD

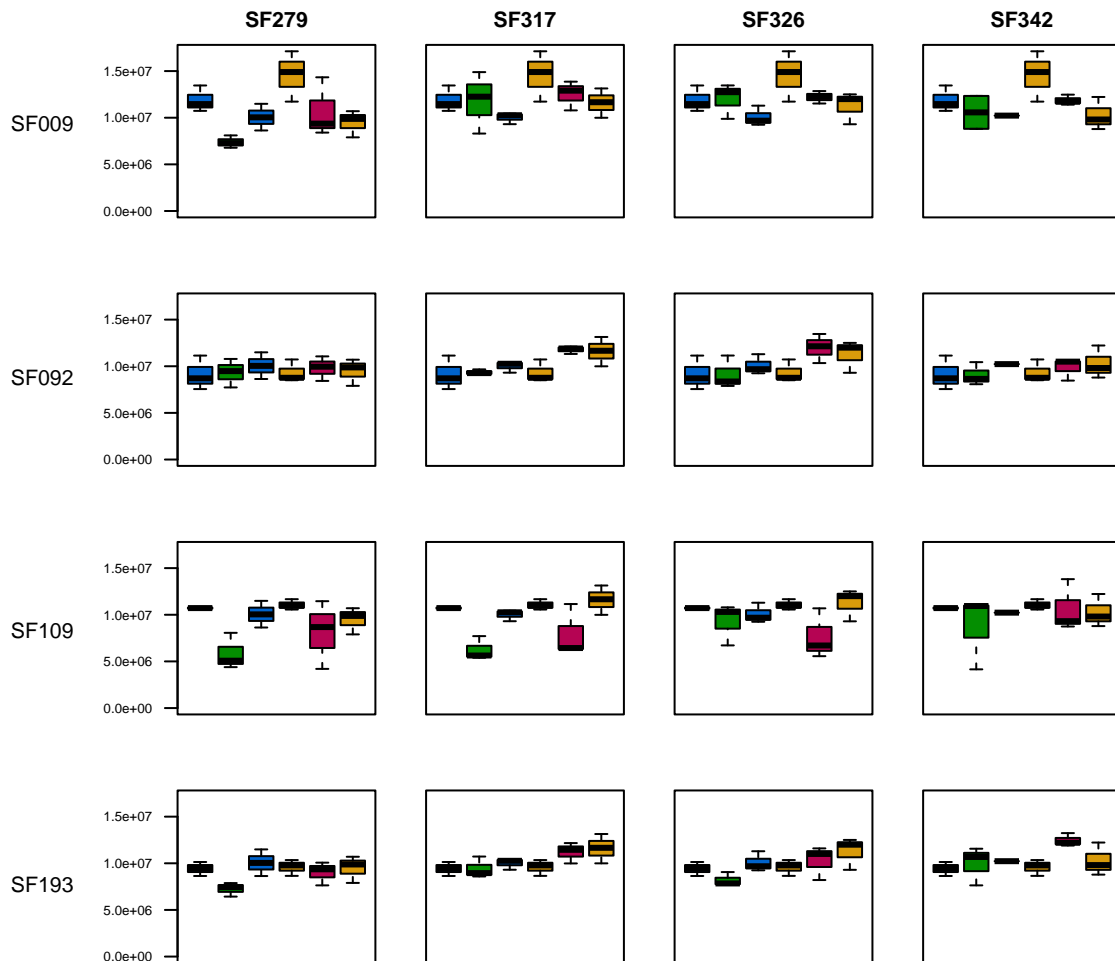



HanXRQChr04g0121171  
Putative HAD-like domain

Parents WW  
Parents WD  
Hybrids WW  
Hybrids WD

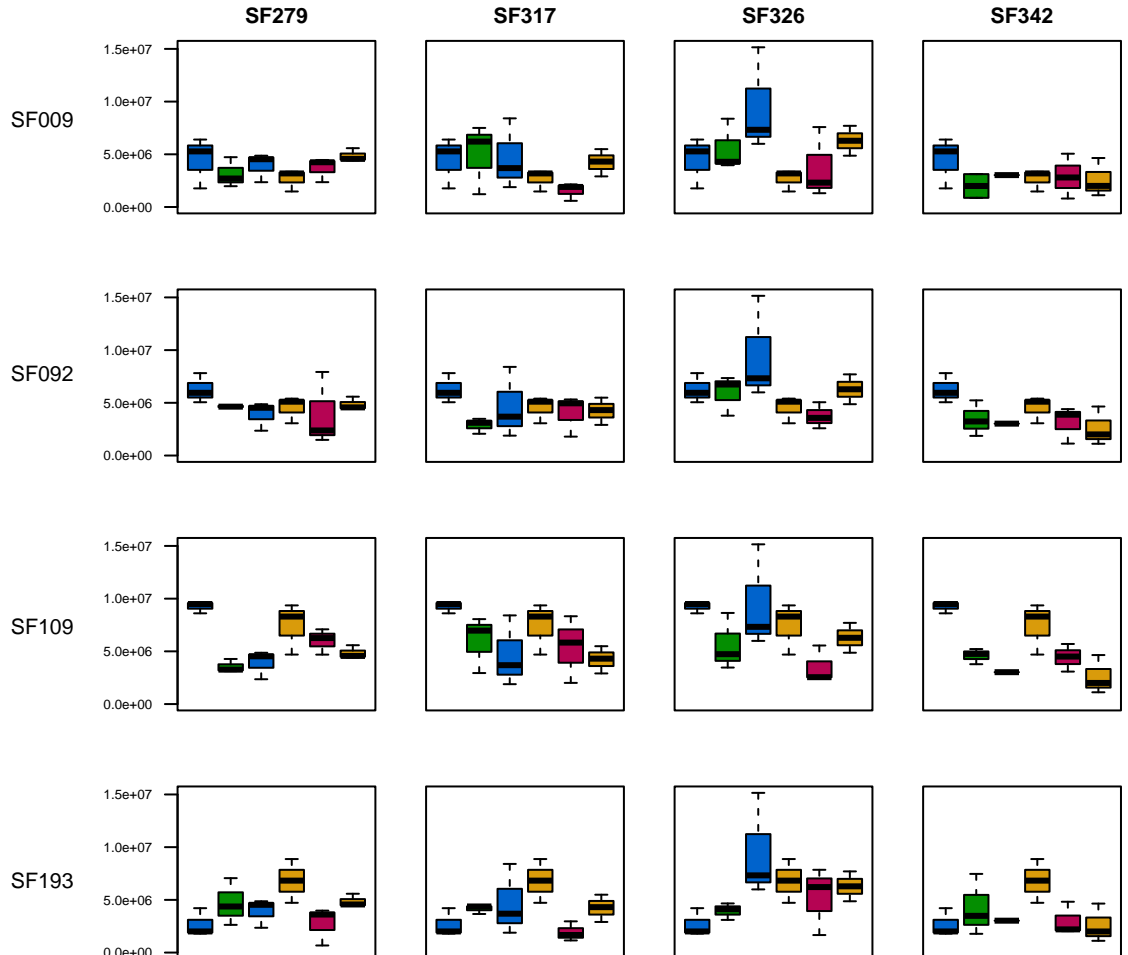

HanXRQChr15g0492501  
Probable glyceraldehyde-3-phosphate  
dehydrogenase B, chloroplastic

Parents WW  
Parents WD  
Hybrids WW  
Hybrids WD

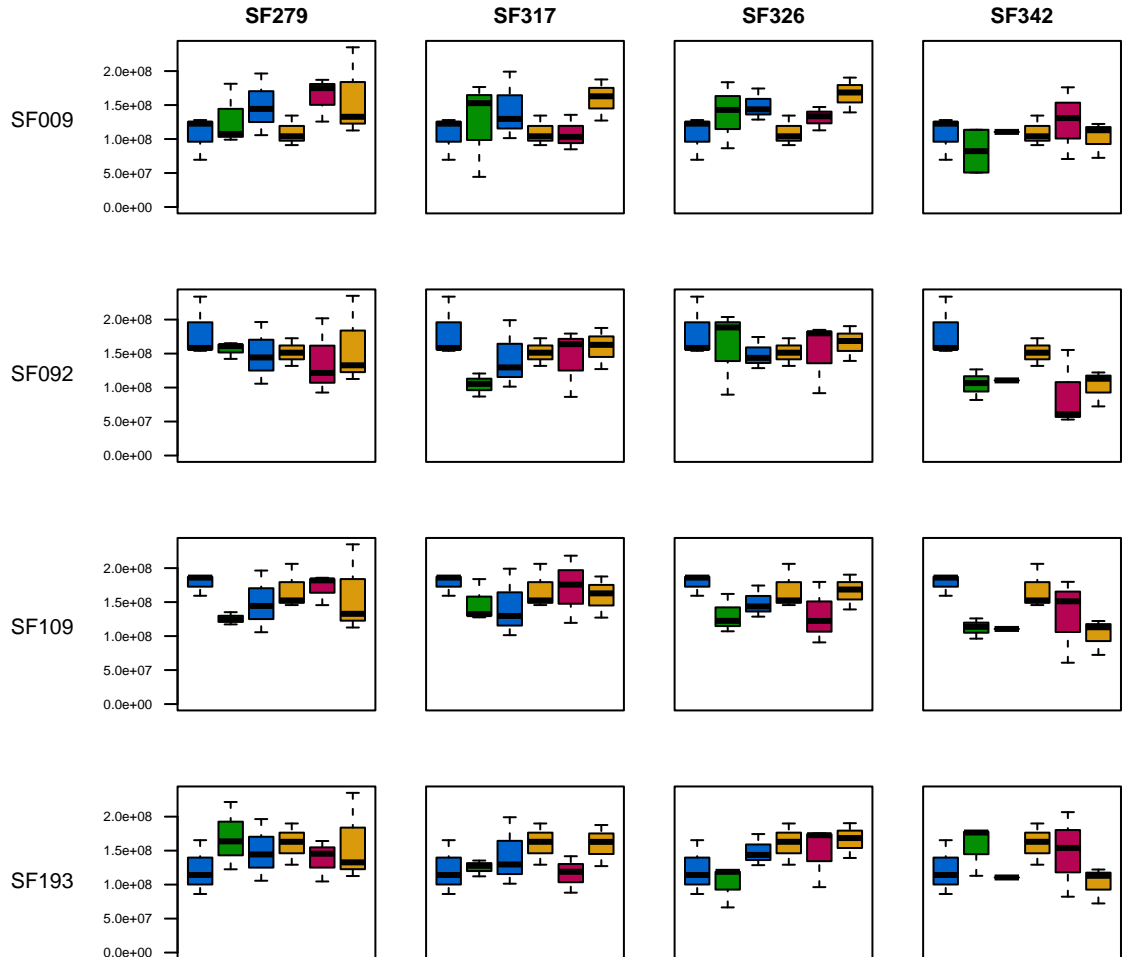

HanXRQChr01g0005901  
Putative SGNH hydrolase-type esterase  
domain

Parents WW  
Parents WD  
Hybrids WW  
Hybrids WD

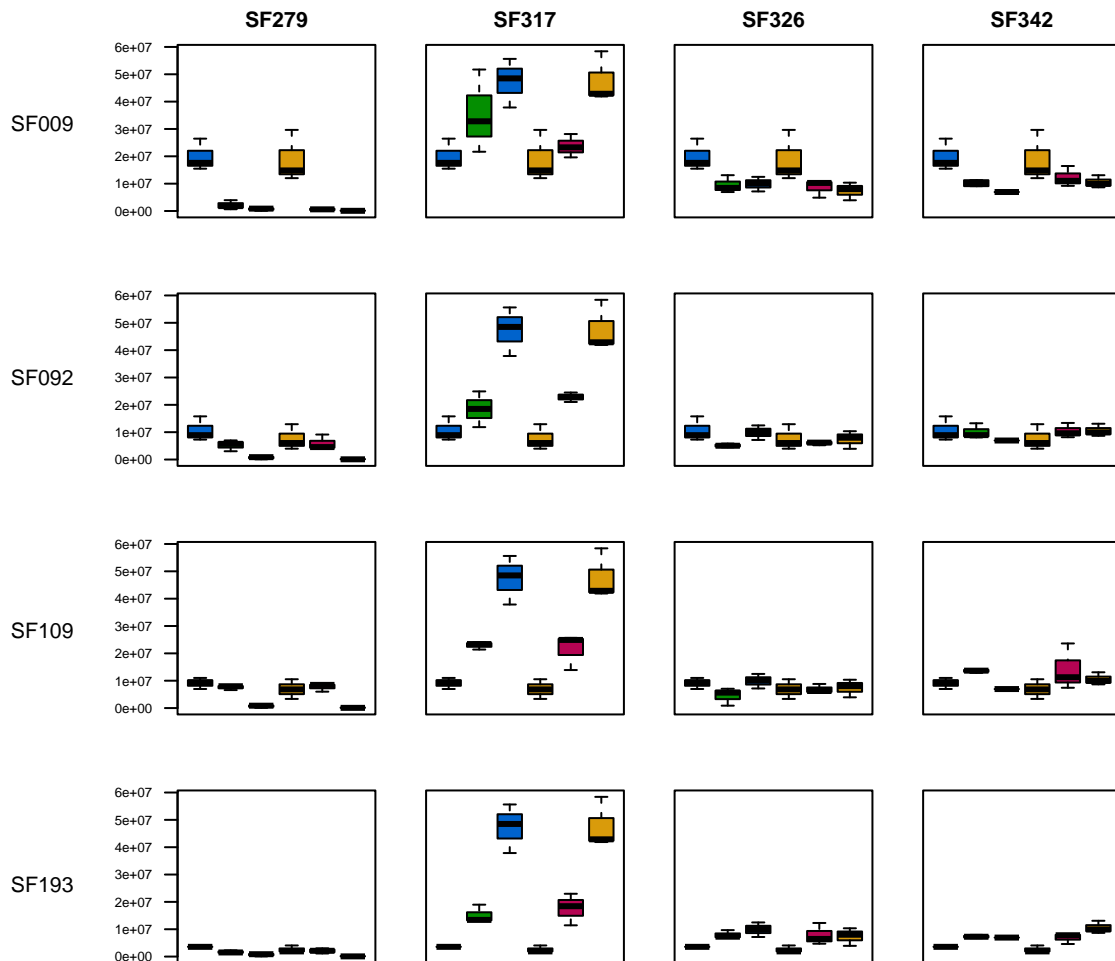

HanXRQChr01g0016781  
Putative dimeric alpha-beta barrel

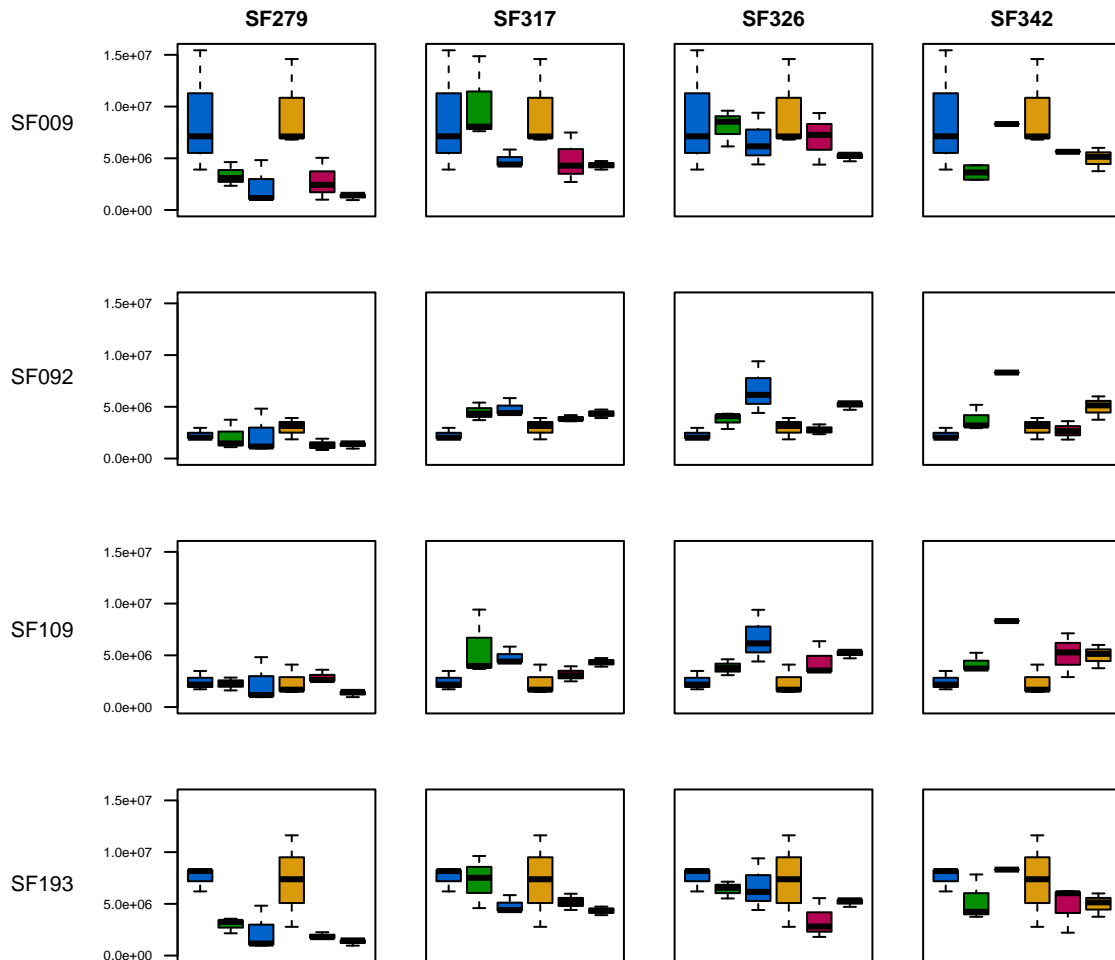

HanXRQChr14g0451961  
 Probable MORN (Membrane Occupation and  
 Recognition Nexus) repeat-containing protein

Parents WW  
 Parents WD  
 Hybrids WW  
 Hybrids WD

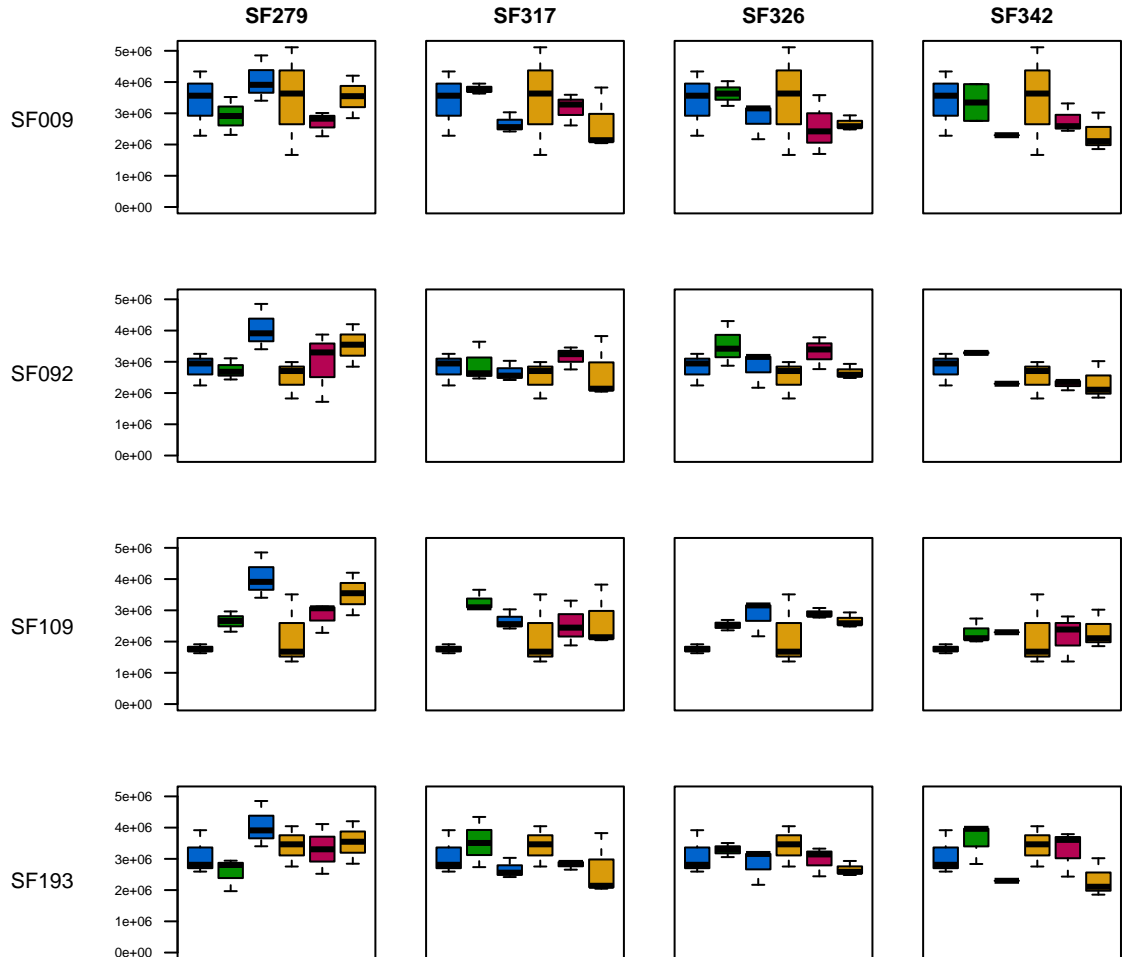

HanXRQChr16g0508901  
Putative granulin; Peptidase C1A;  
Cysteine peptidase, histidine active site; Cy

Parents WW  
Parents WD  
Hybrids WW  
Hybrids WD

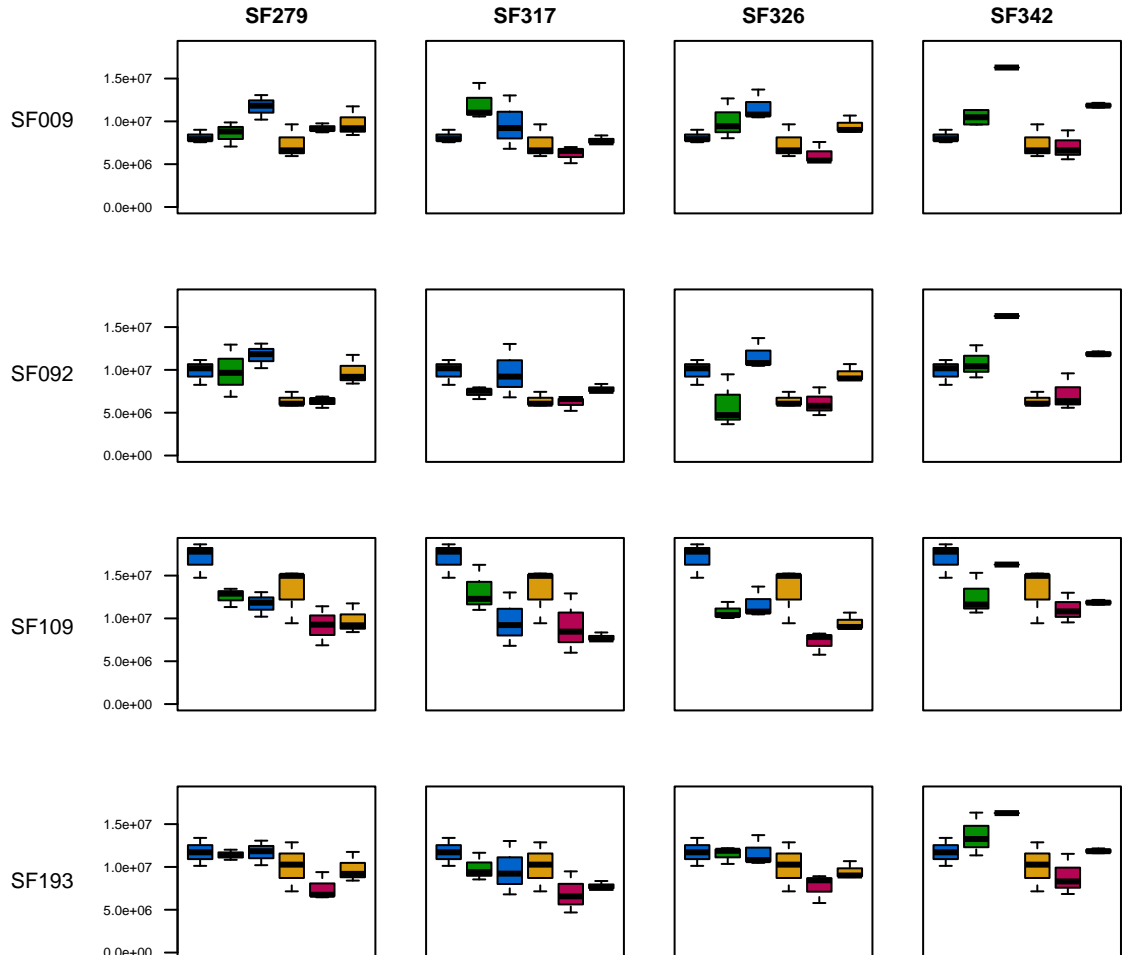

HanXRQChr13g0388191  
 Probable chloroplast stem-loop binding  
 protein of 41 kDa

Parents WW  
 Parents WD  
 Hybrids WW  
 Hybrids WD

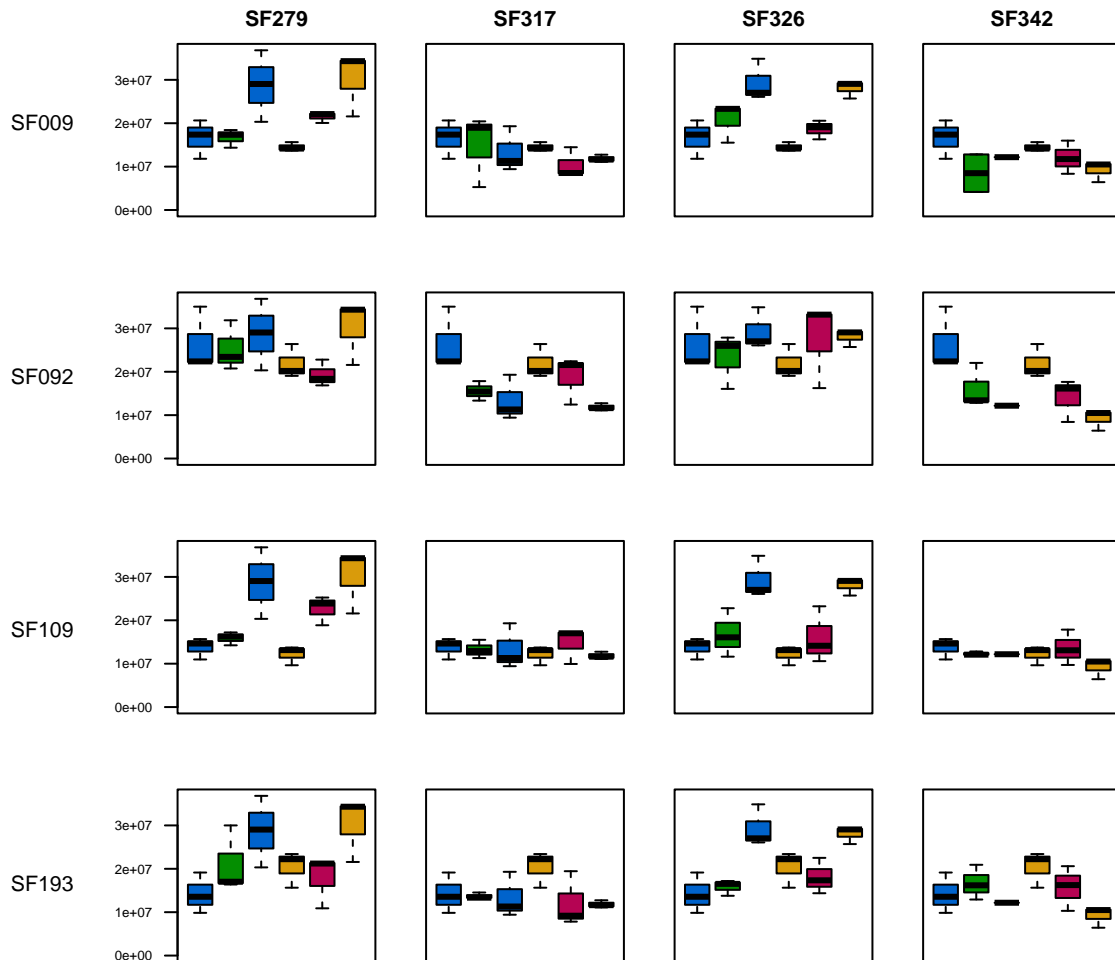

HanXRQChr13g0399621  
Probable 60S acidic ribosomal protein P0

- Parents WW
- Parents WD
- Hybrids WW
- Hybrids WD

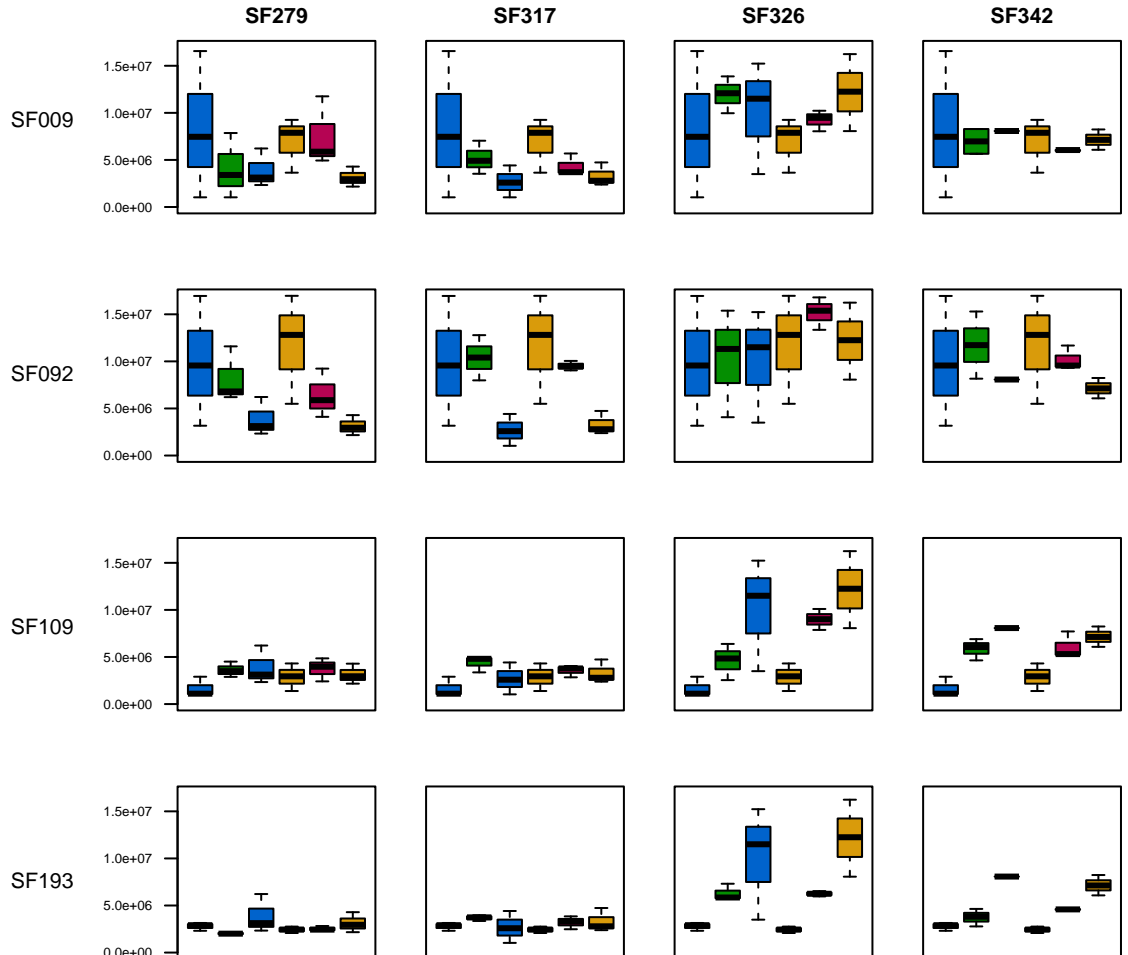



HanXRQChr13g0421951  
Putative L-lactate/malate  
dehydrogenase; Malate dehydrogenase, tyr

Parents WW  
Parents WD  
Hybrids WW  
Hybrids WD

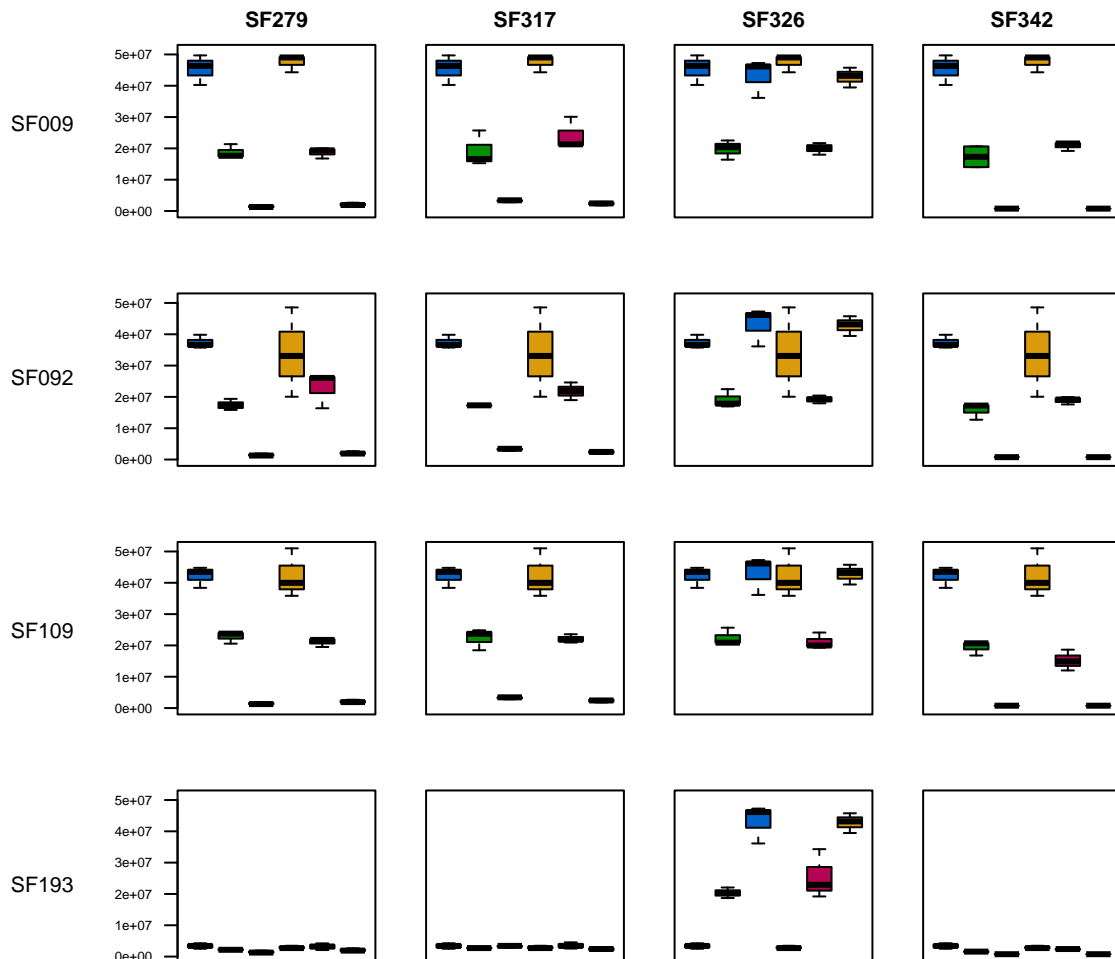

HanXRQChr04g0107061  
Putative heat shock protein 70 family;  
Heat shock protein 70kD, peptide-binding c

Parents WW  
Parents WD  
Hybrids WW  
Hybrids WD

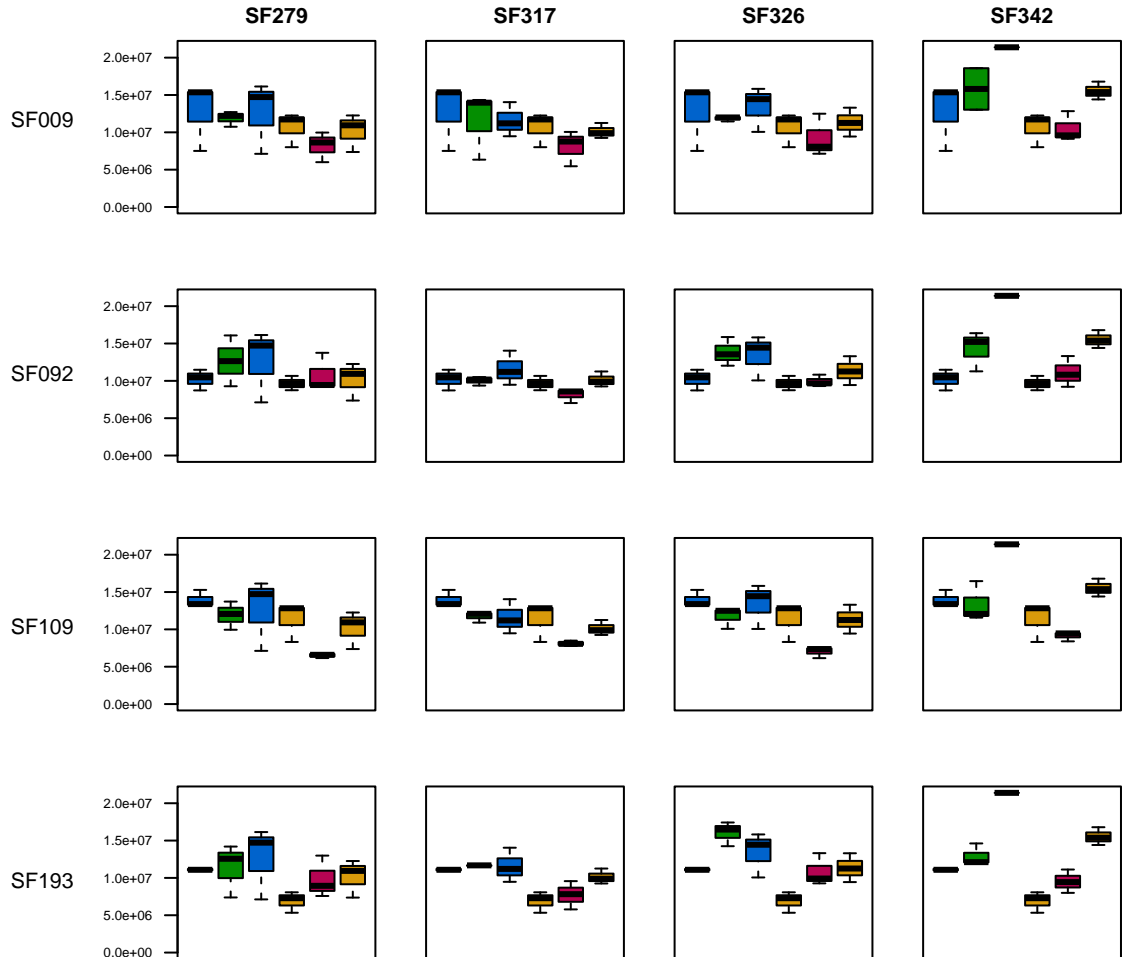

HanXRQChr05g0142181  
Probable glutaredoxin family protein

Parents WW  
Parents WD  
Hybrids WW  
Hybrids WD

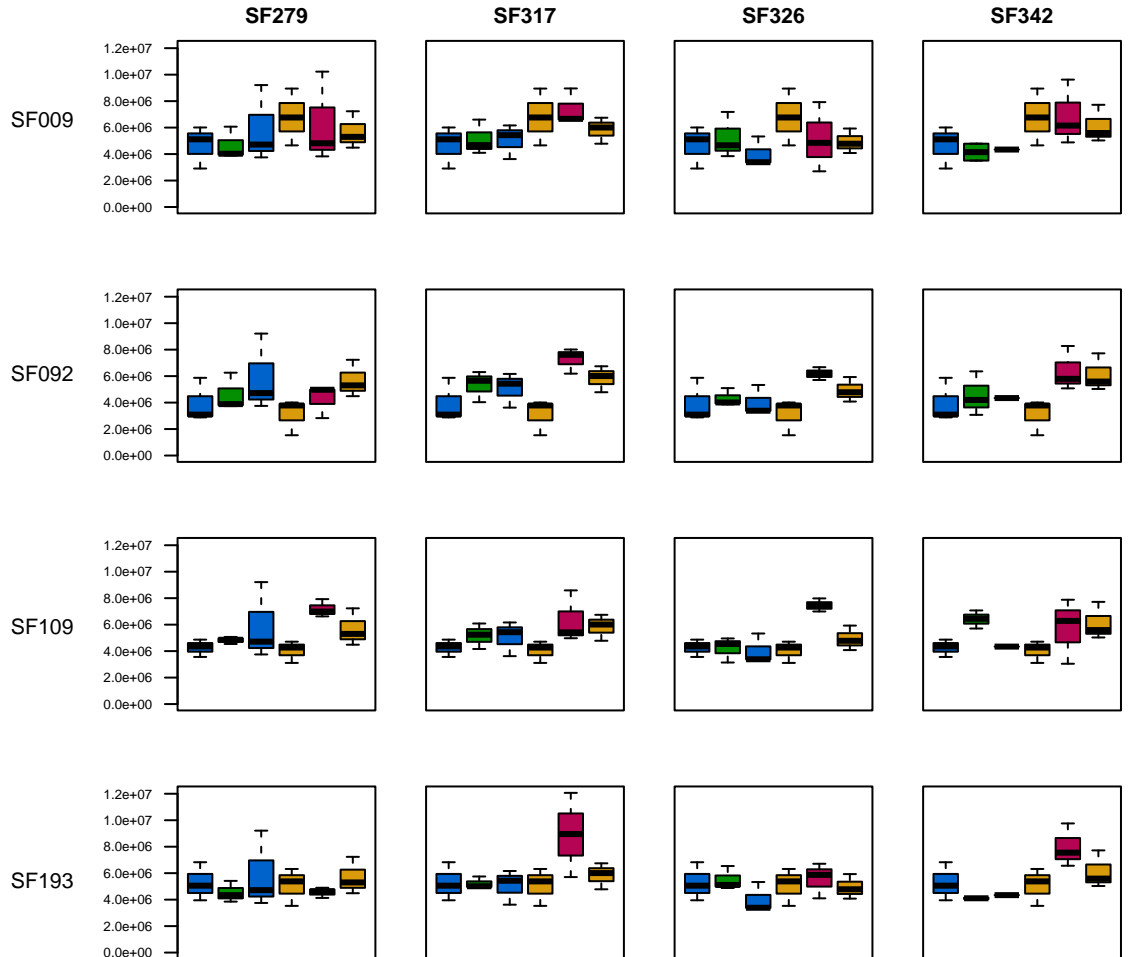

HanXRQChr17g0555771  
Probable groES-like zinc-binding  
alcohol dehydrogenase family protein

Parents WW  
Parents WD  
Hybrids WW  
Hybrids WD

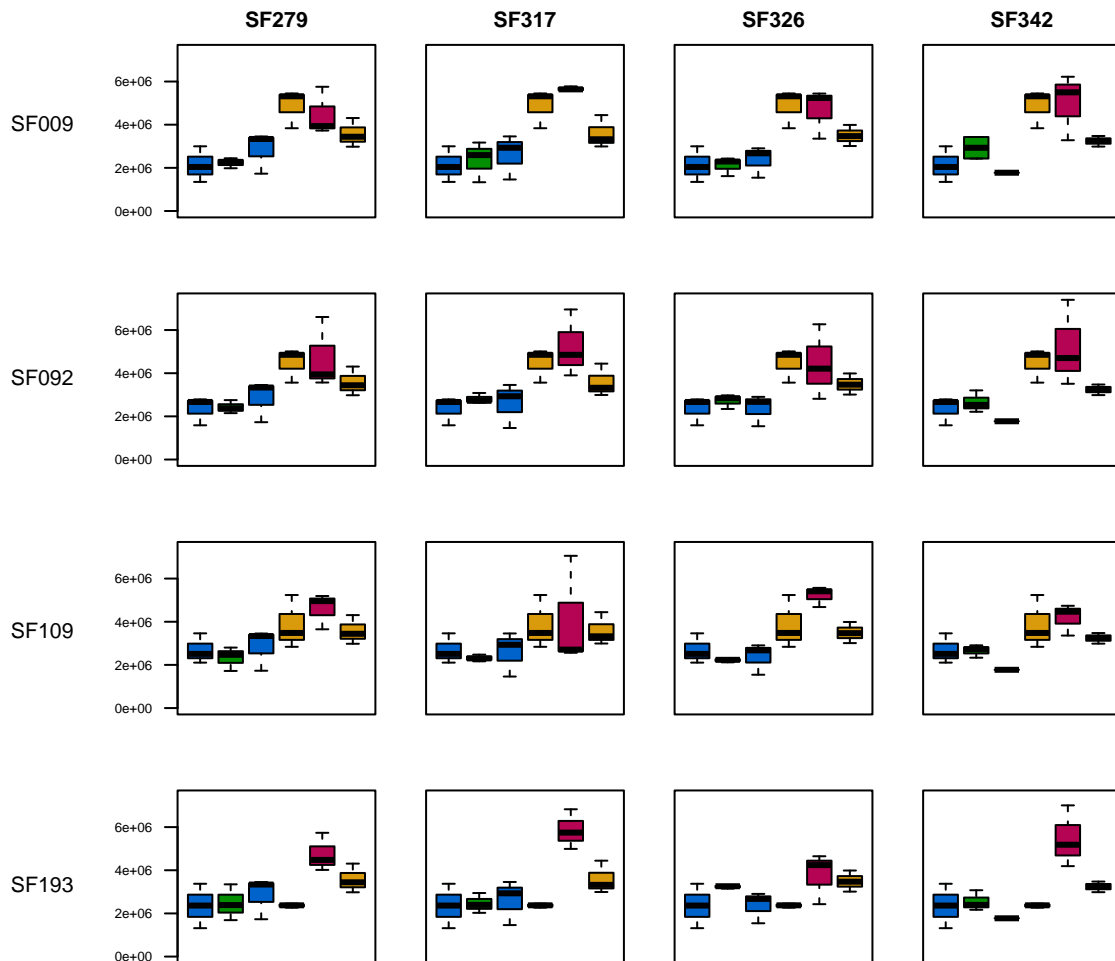

HanXRQChr16g0511141  
Probable ribosomal protein L6 family

Parents WW  
Parents WD  
Hybrids WW  
Hybrids WD

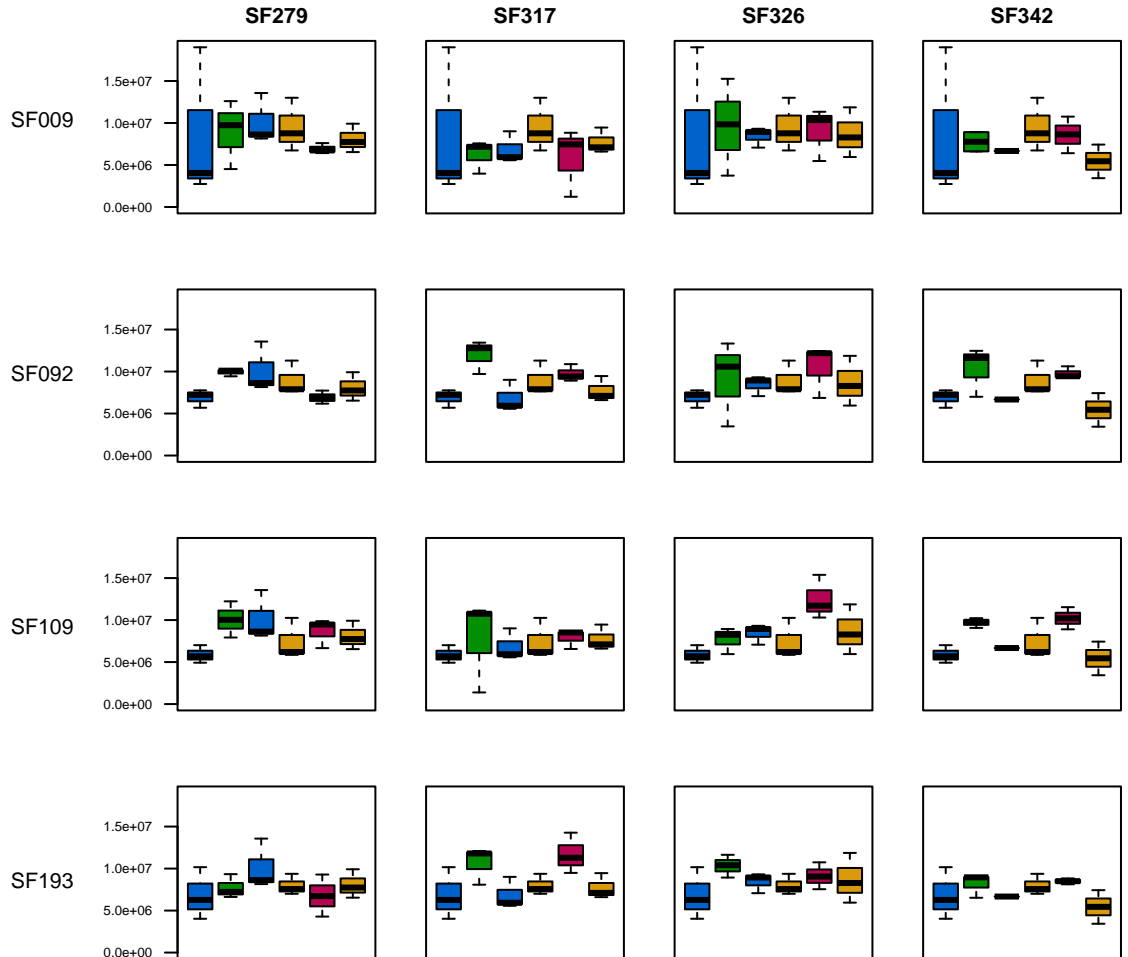

HanXRQChr04g0108381  
Probable rotamase FKBP 1

Parents WW  
Parents WD  
Hybrids WW  
Hybrids WD

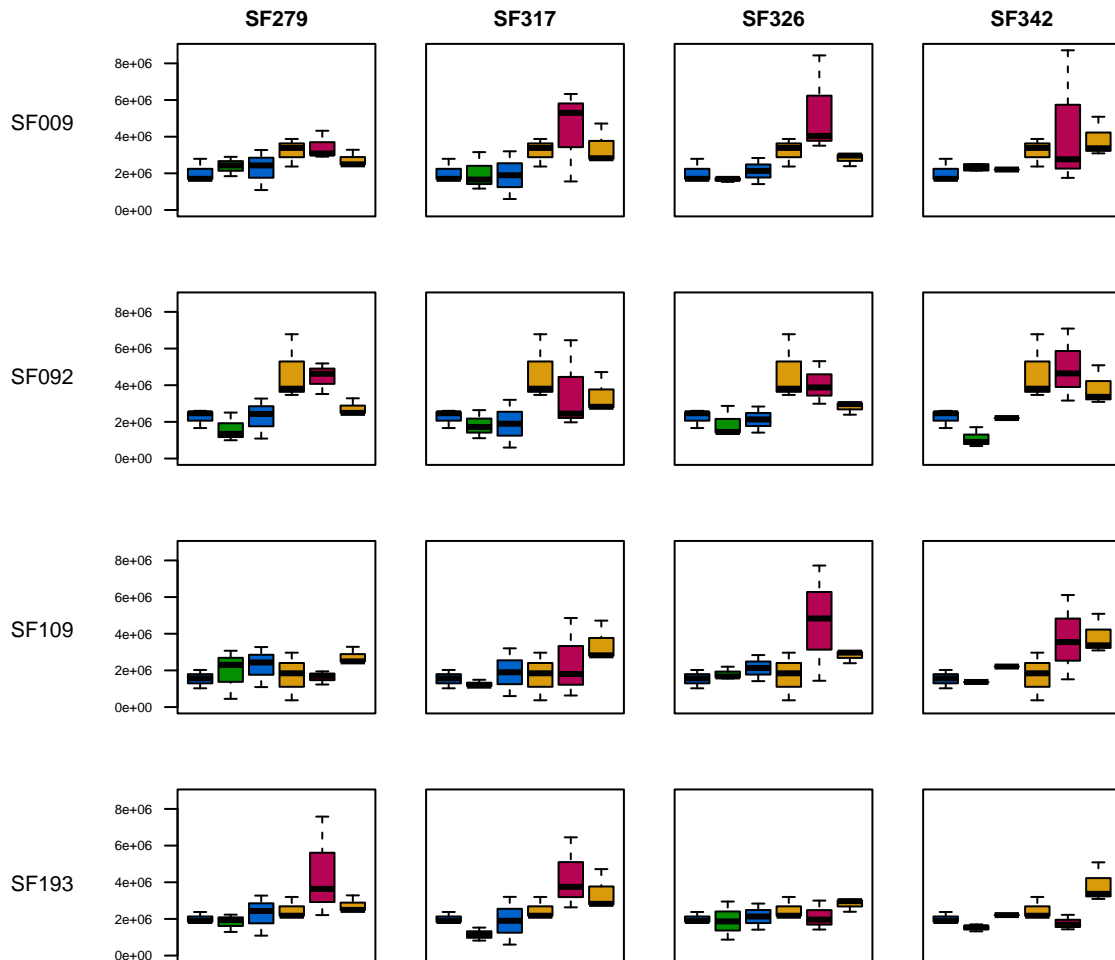

HanXRQChr01g0023331  
 Putative alcohol dehydrogenase  
 superfamily, zinc-type; NAD(P)-binding doi

Parents WW  
 Parents WD  
 Hybrids WW  
 Hybrids WD

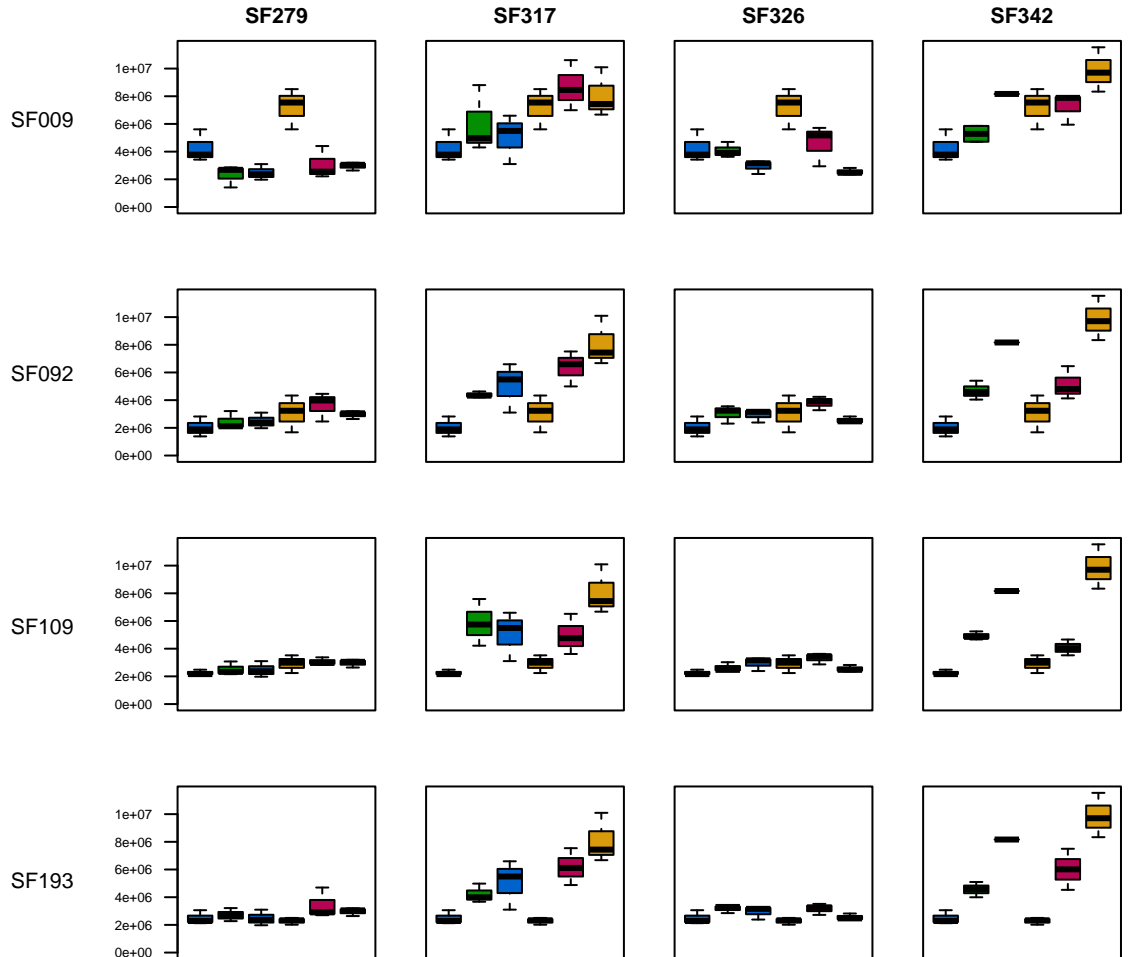

HanXRQChr03g0069451  
Probable aconitase 3

Parents WW  
Parents WD  
Hybrids WW  
Hybrids WD

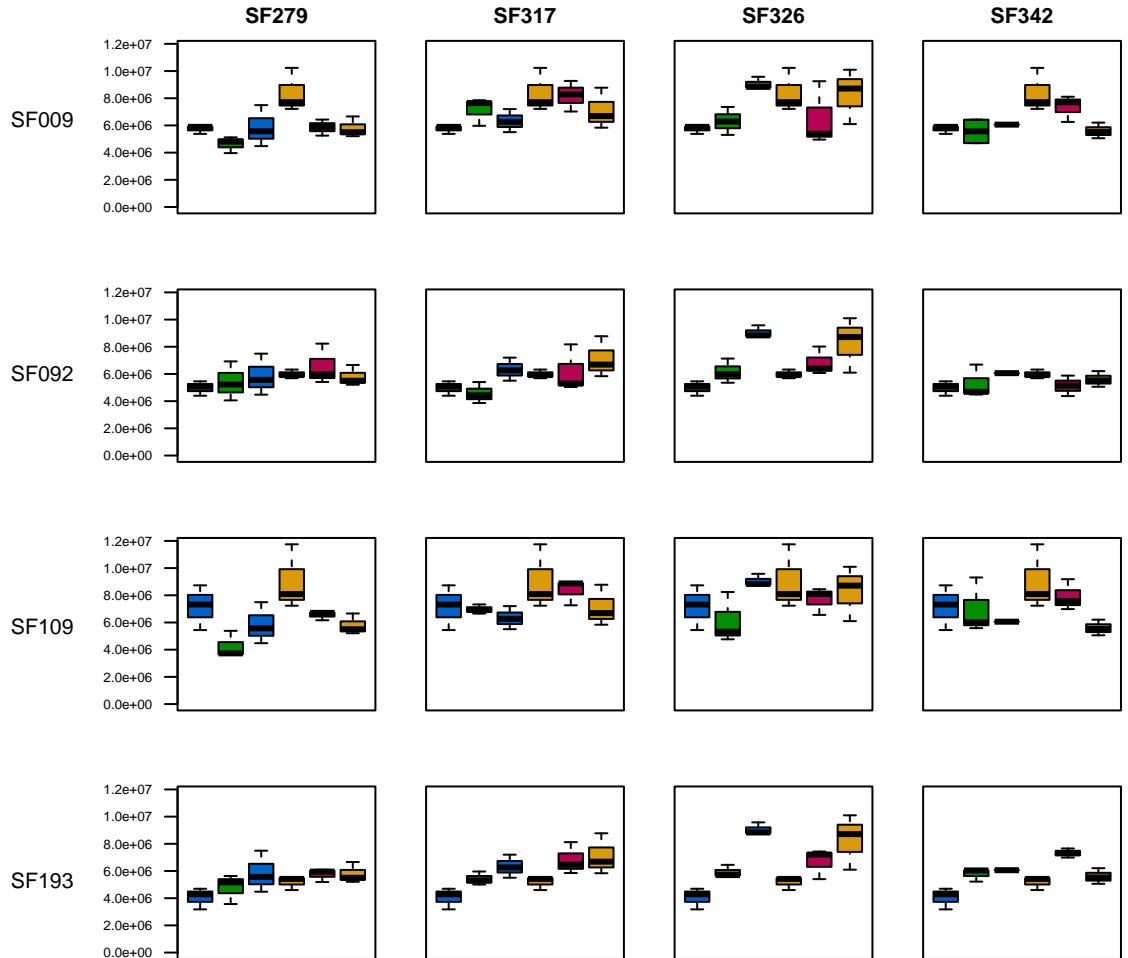



HanXRQChr17g0534531  
Probable uroporphyrinogen decarboxylase

- Parents WW
- Parents WD
- Hybrids WW
- Hybrids WD

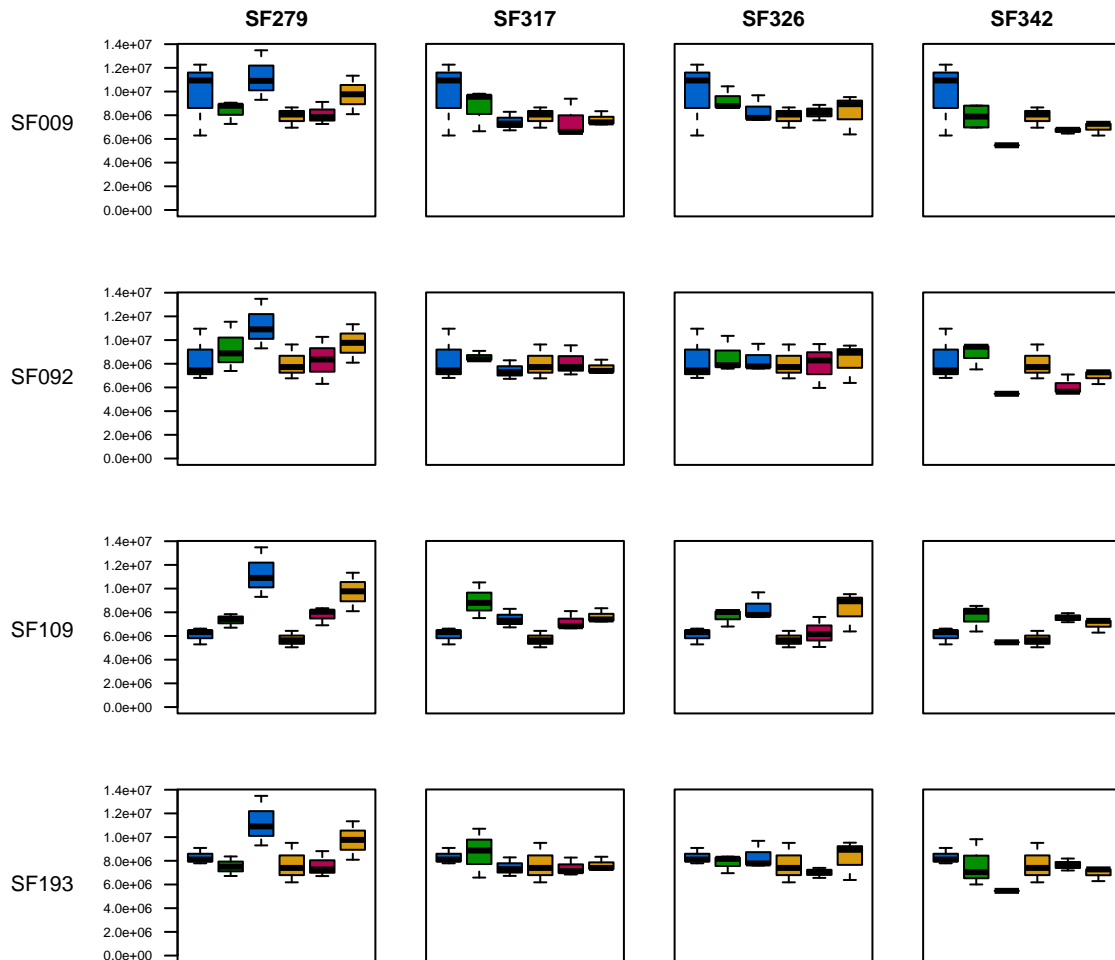

HanXRQChr15g0485591  
 Probable ferredoxin--NADP reductase,  
 leaf isozyme, chloroplastic

Parents WW  
 Parents WD  
 Hybrids WW  
 Hybrids WD

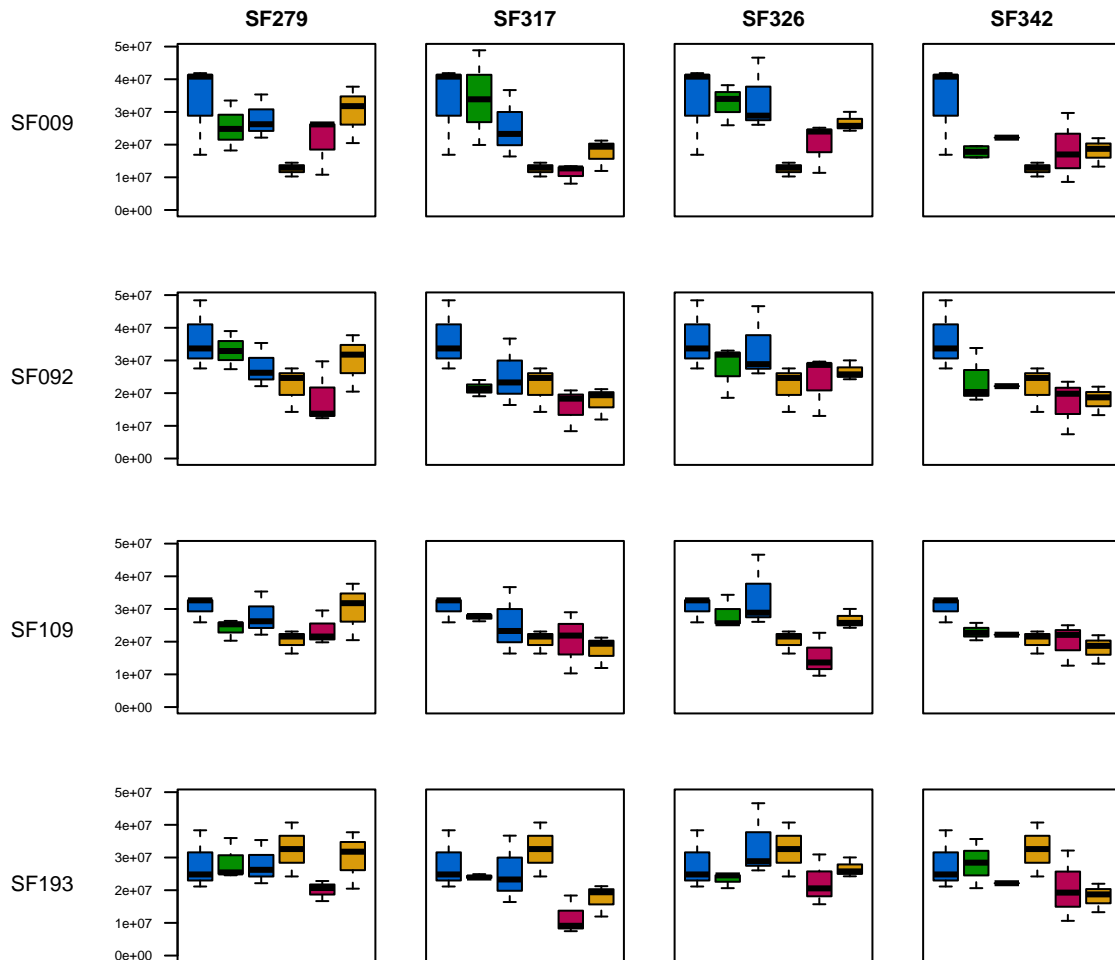

HanXRQChr17g0551761  
Putative ribosomal protein S19e; Winged  
helix–turn–helix DNA–binding domain

Parents WW  
Parents WD  
Hybrids WW  
Hybrids WD

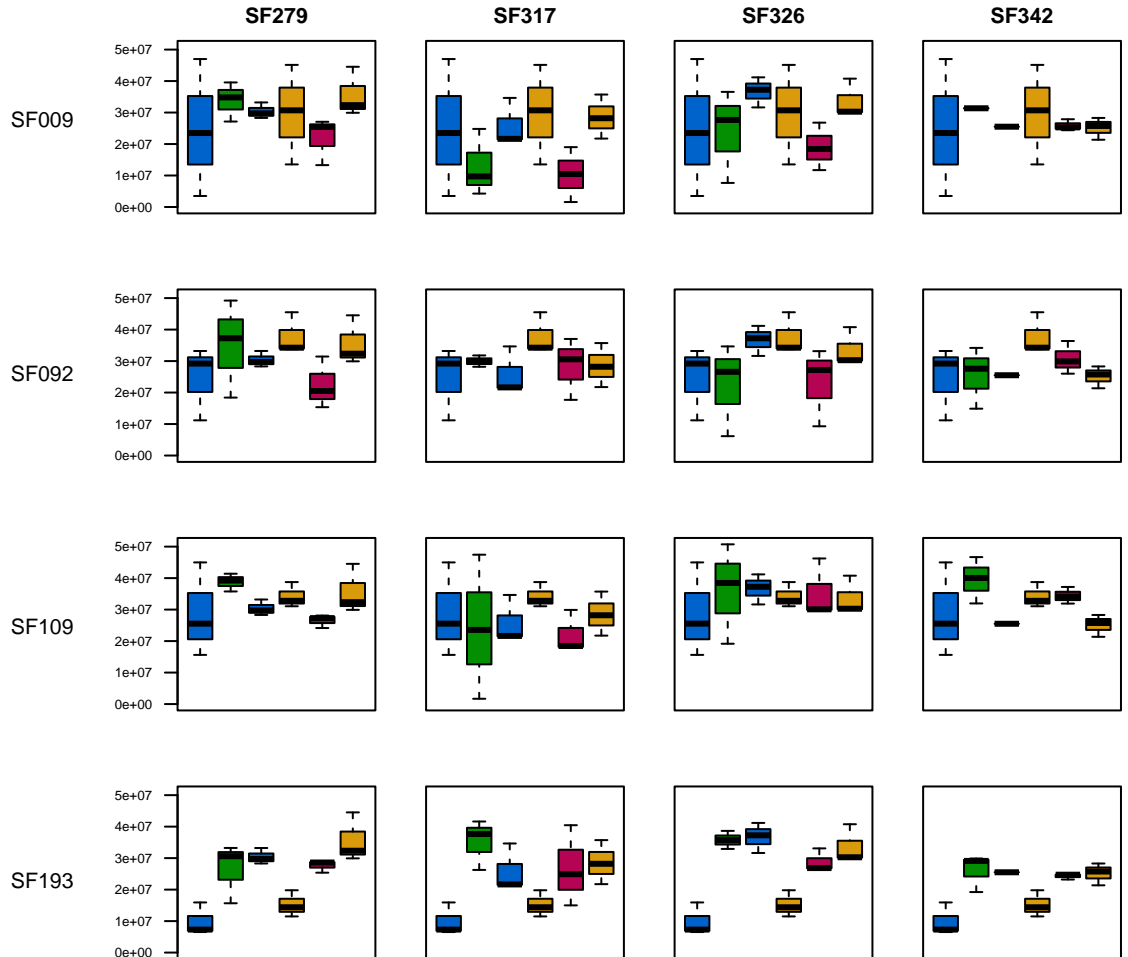

HanXRQChr06g0175251  
Putative cyclophilin-type  
peptidyl-prolyl cis-trans isomerase domain

Parents WW  
Parents WD  
Hybrids WW  
Hybrids WD

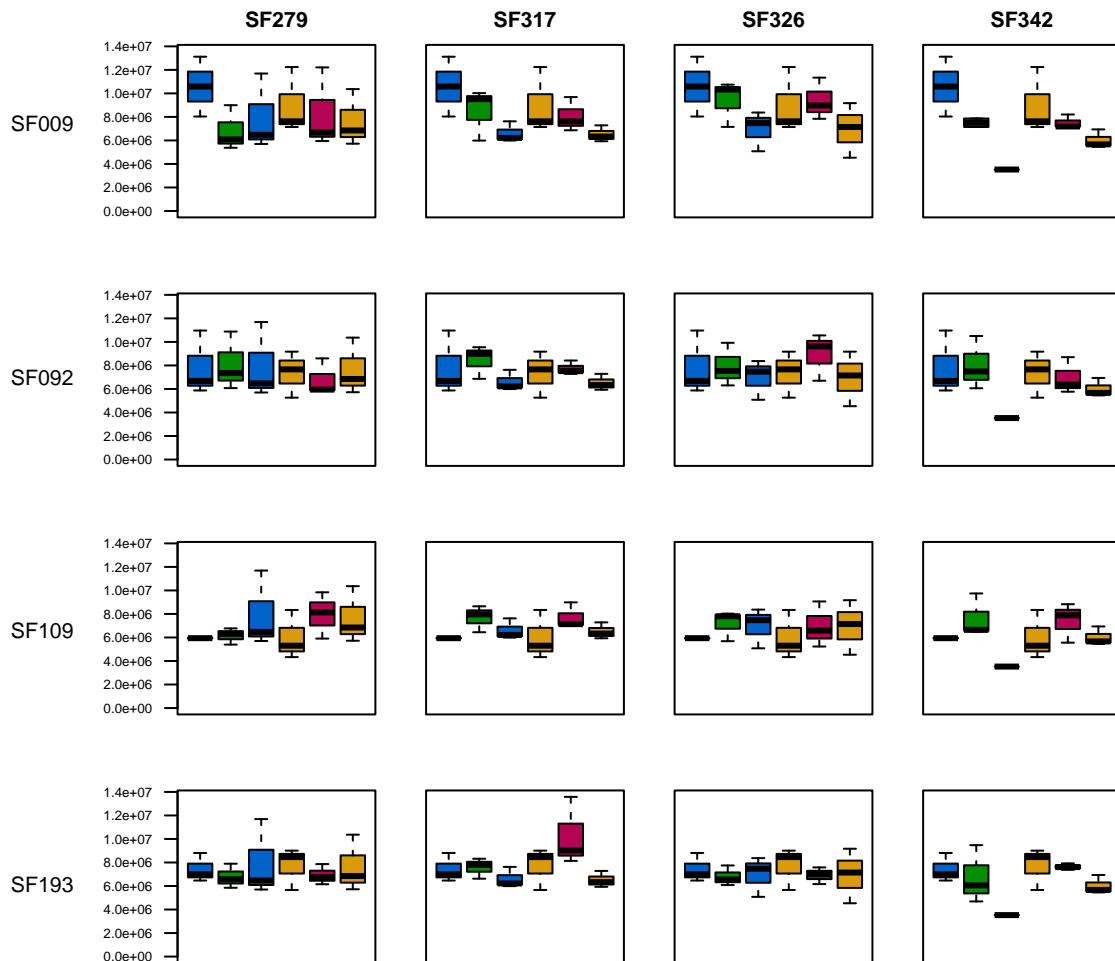

HanXRQChr06g0174621  
 Probable chlorophyll a-b binding  
 protein, chloroplastic

Parents WW  
 Parents WD  
 Hybrids WW  
 Hybrids WD

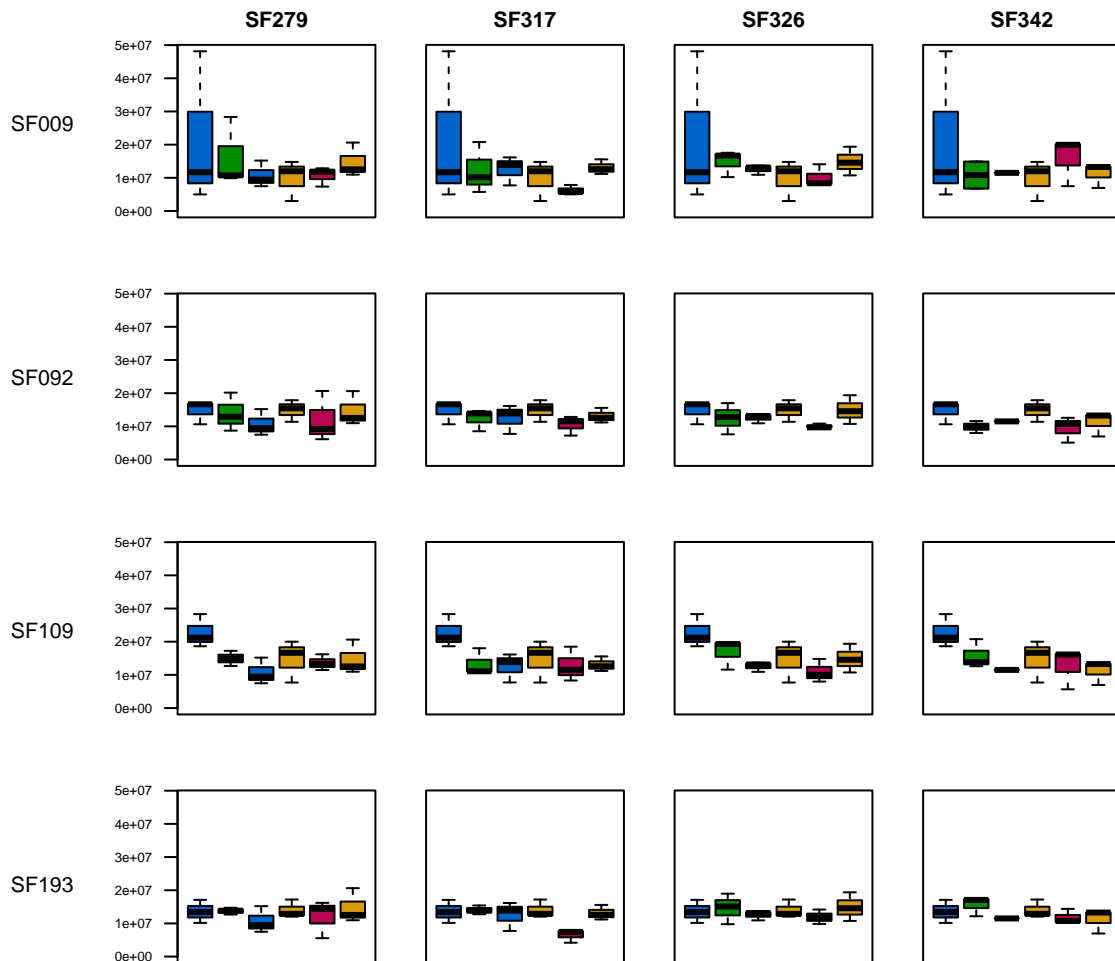

HanXRQChr04g0107661  
Probable groES-like zinc-binding  
dehydrogenase family protein

Parents WW  
Parents WD  
Hybrids WW  
Hybrids WD

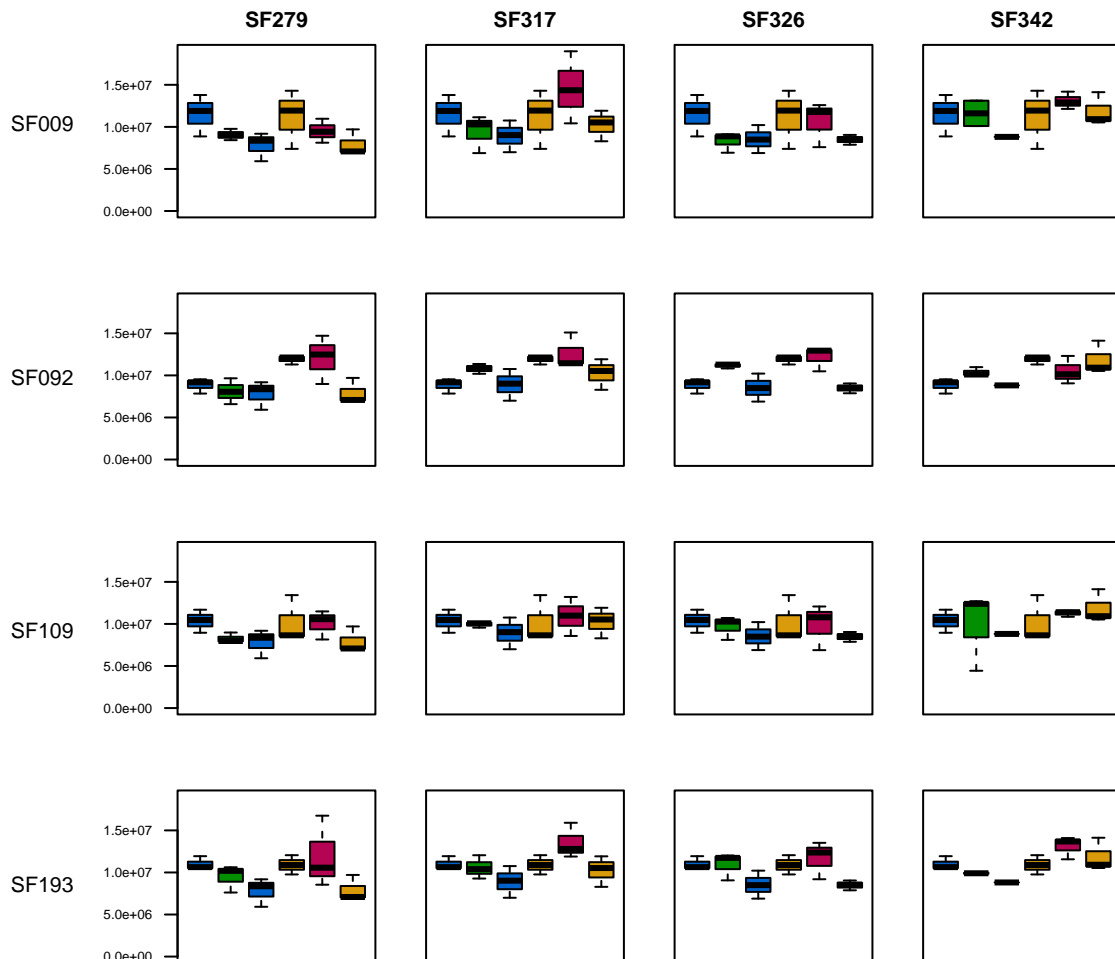

HanXRQChr09g0260041  
Probable protochlorophyllide reductase,  
chloroplastic

Parents WW  
Parents WD  
Hybrids WW  
Hybrids WD

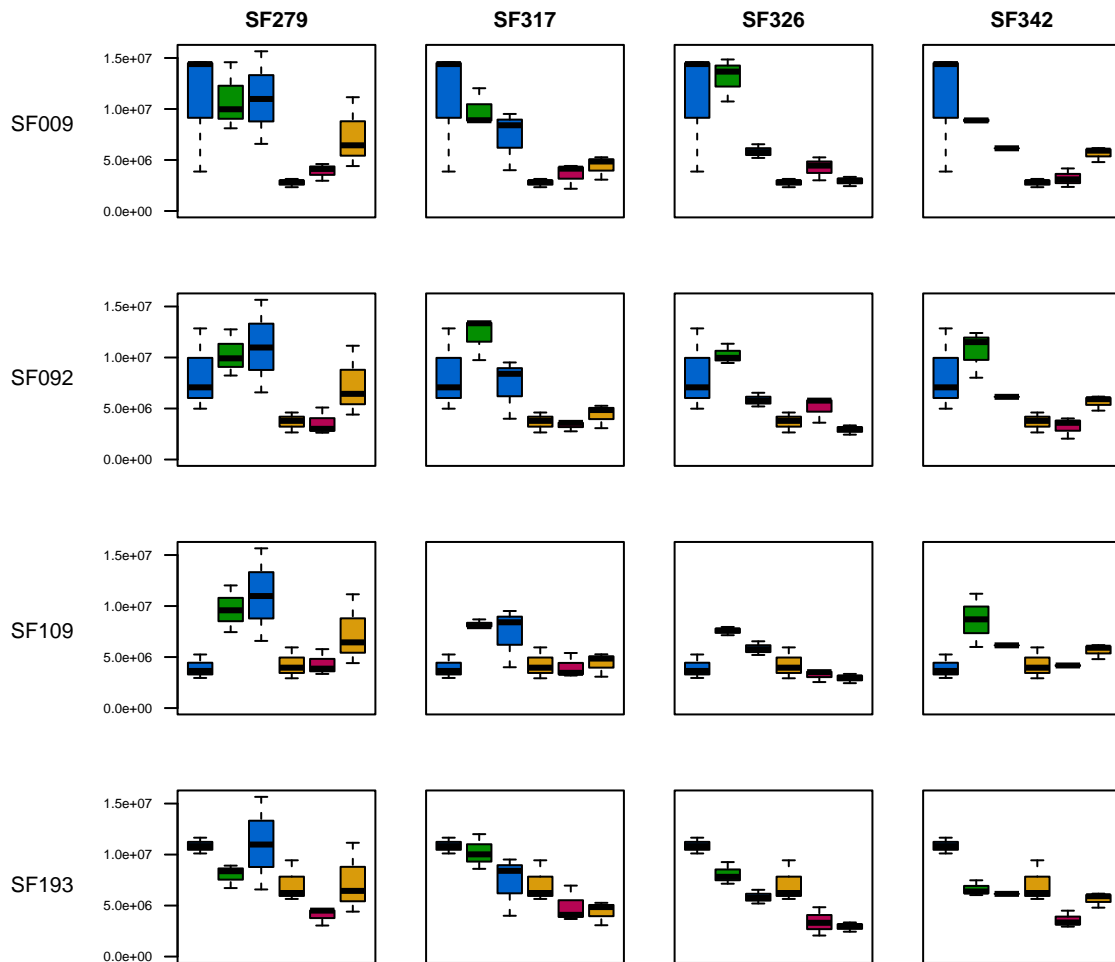

HanXRQChr14g0446441  
Probable pyridoxal phosphate  
(PLP)-dependent transferases superfamily

Parents WW  
Parents WD  
Hybrids WW  
Hybrids WD

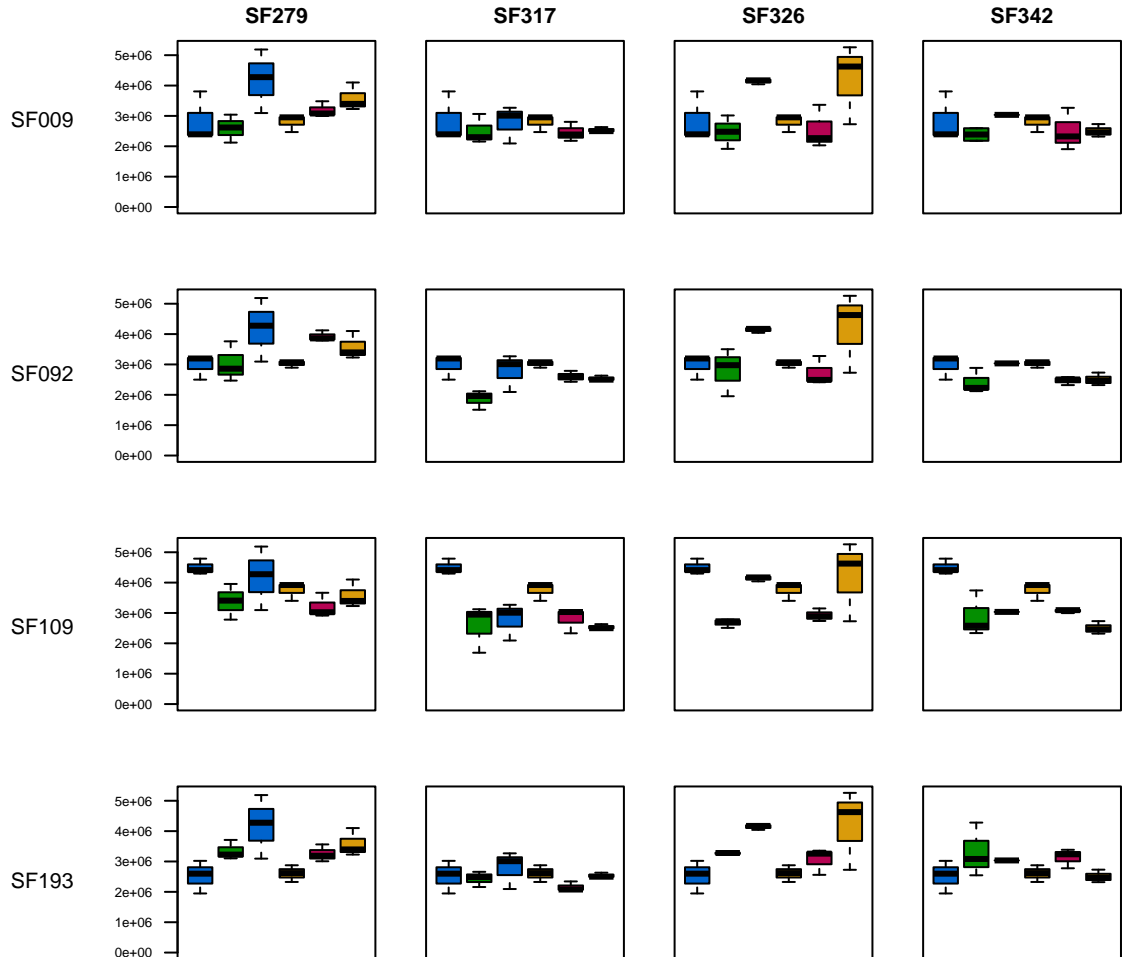



HanXRQChr15g0485721  
Probable soluble starch synthase 1,  
chloroplastic/amyloplastic

Parents WW  
Parents WD  
Hybrids WW  
Hybrids WD

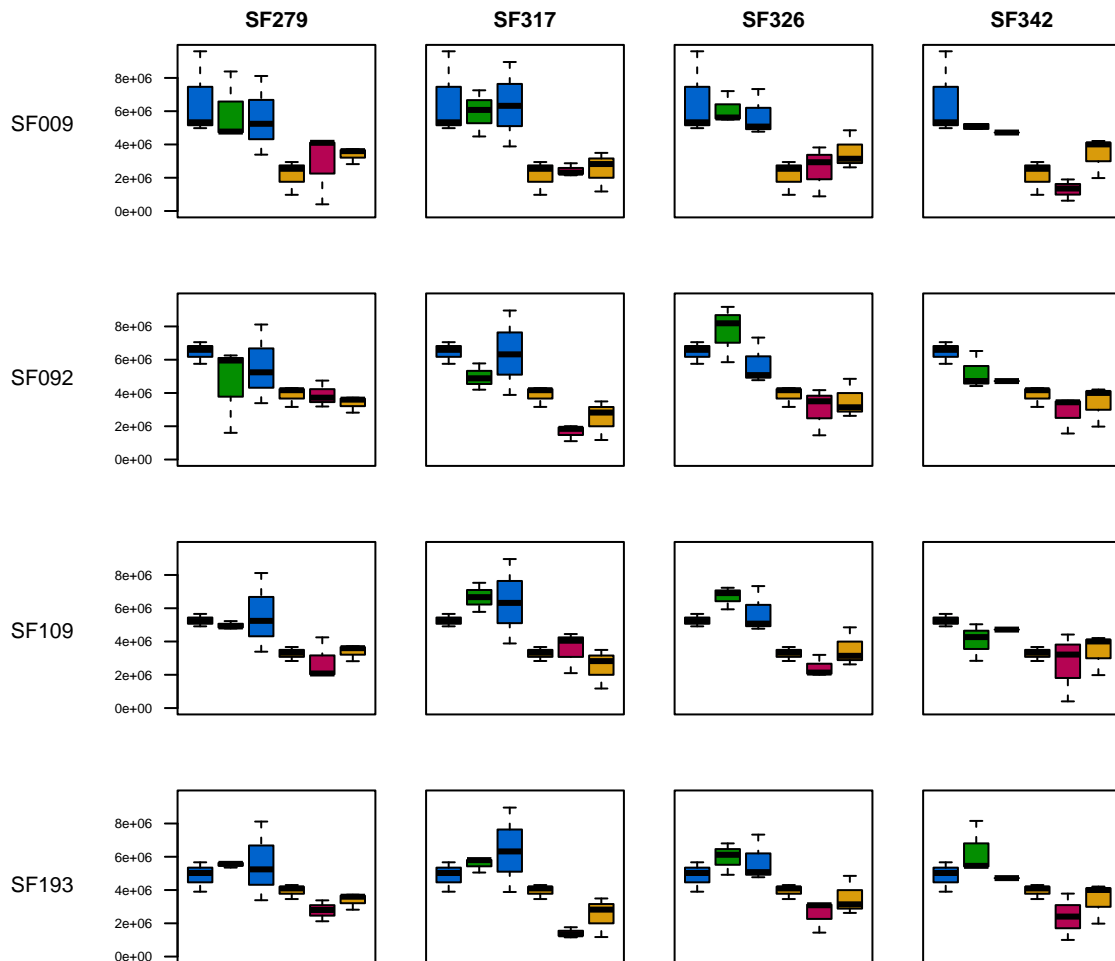

HanXRQChr11g0324951  
Probable allene oxide cyclase 2

Parents WW  
Parents WD  
Hybrids WW  
Hybrids WD

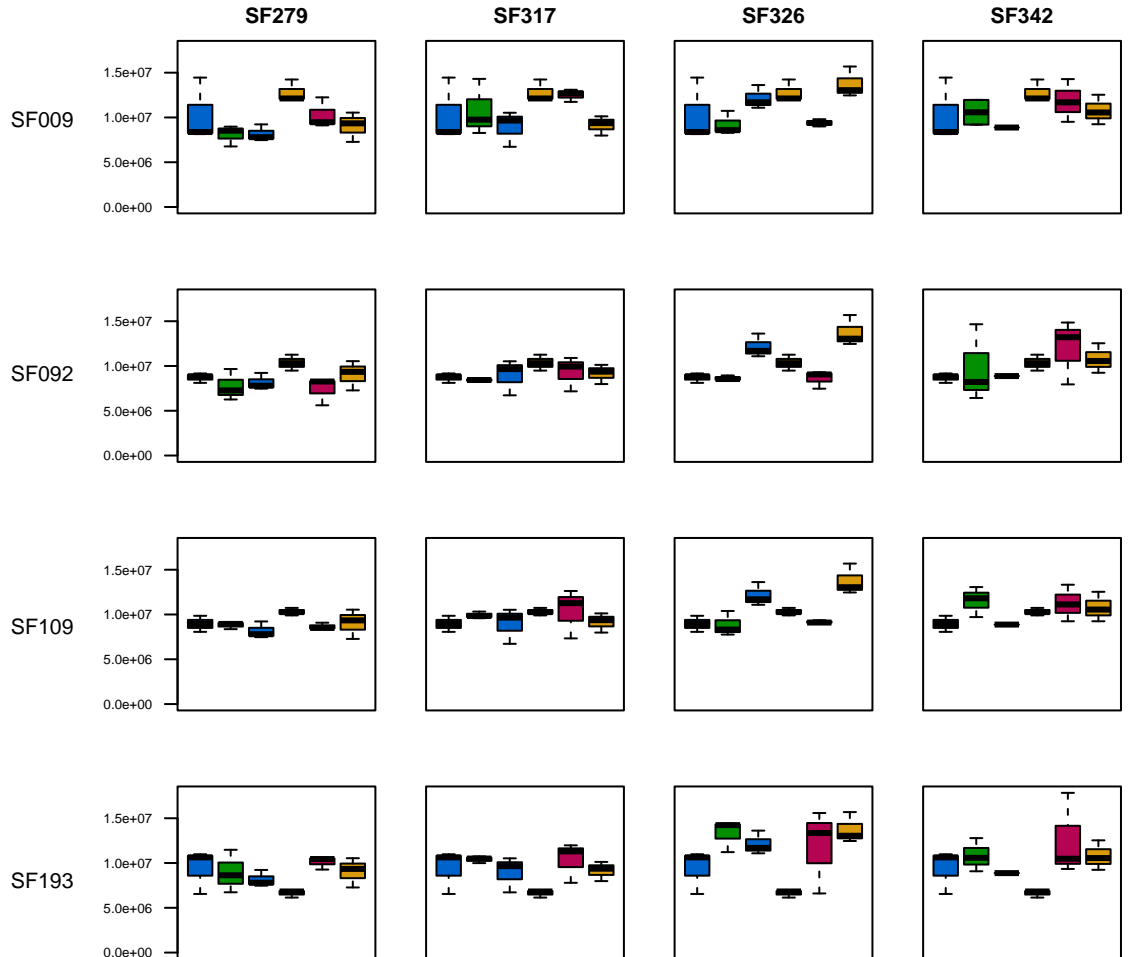

HanXRQChr06g0170491  
Putative cyanobacterial aminoacyl-tRNA  
synthetase, CAAD domain

Parents WW  
Parents WD  
Hybrids WW  
Hybrids WD

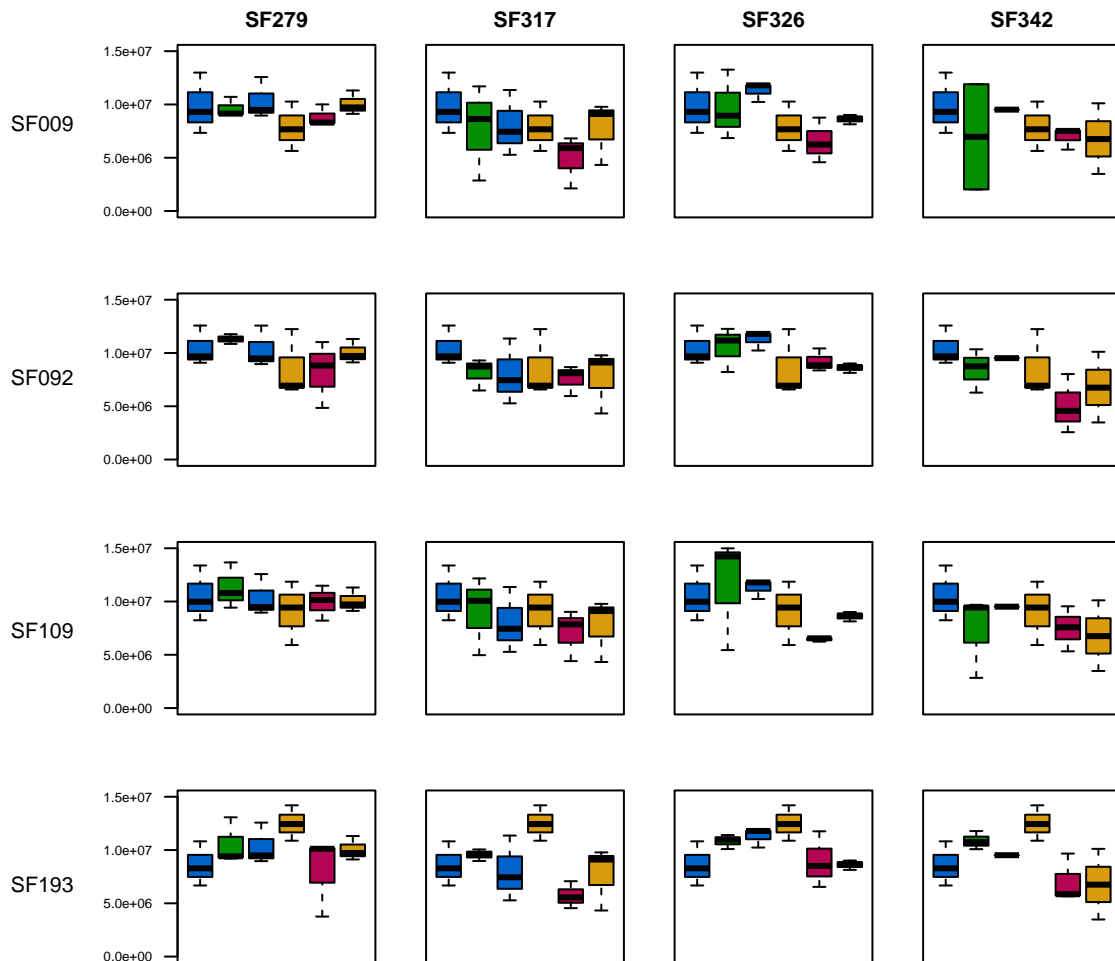

HanXRQChr10g0291721  
Probable DNAJ heat shock family protein

Parents WW  
Parents WD  
Hybrids WW  
Hybrids WD

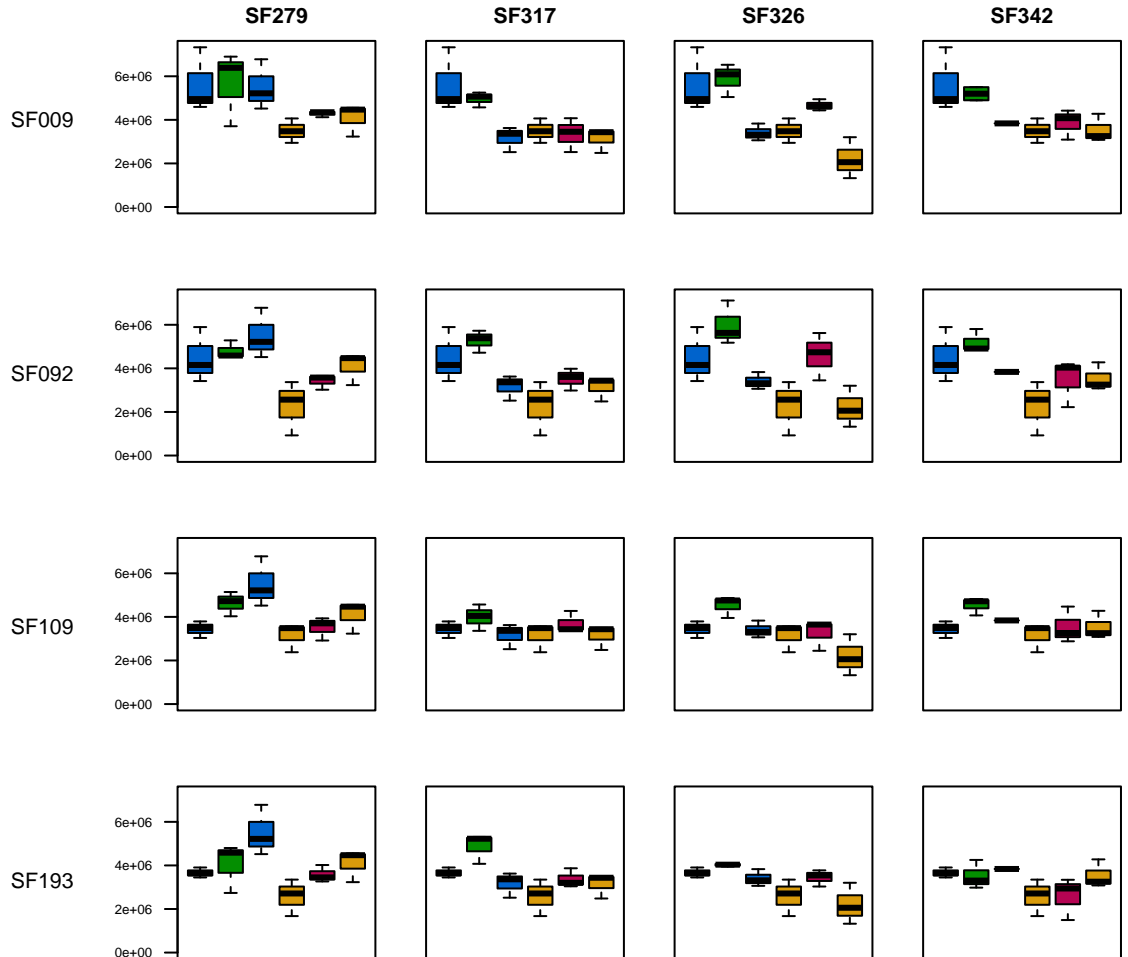

HanXRQChr14g0438721  
Probable T-complex protein 1 subunit  
zeta

Parents WW  
Parents WD  
Hybrids WW  
Hybrids WD

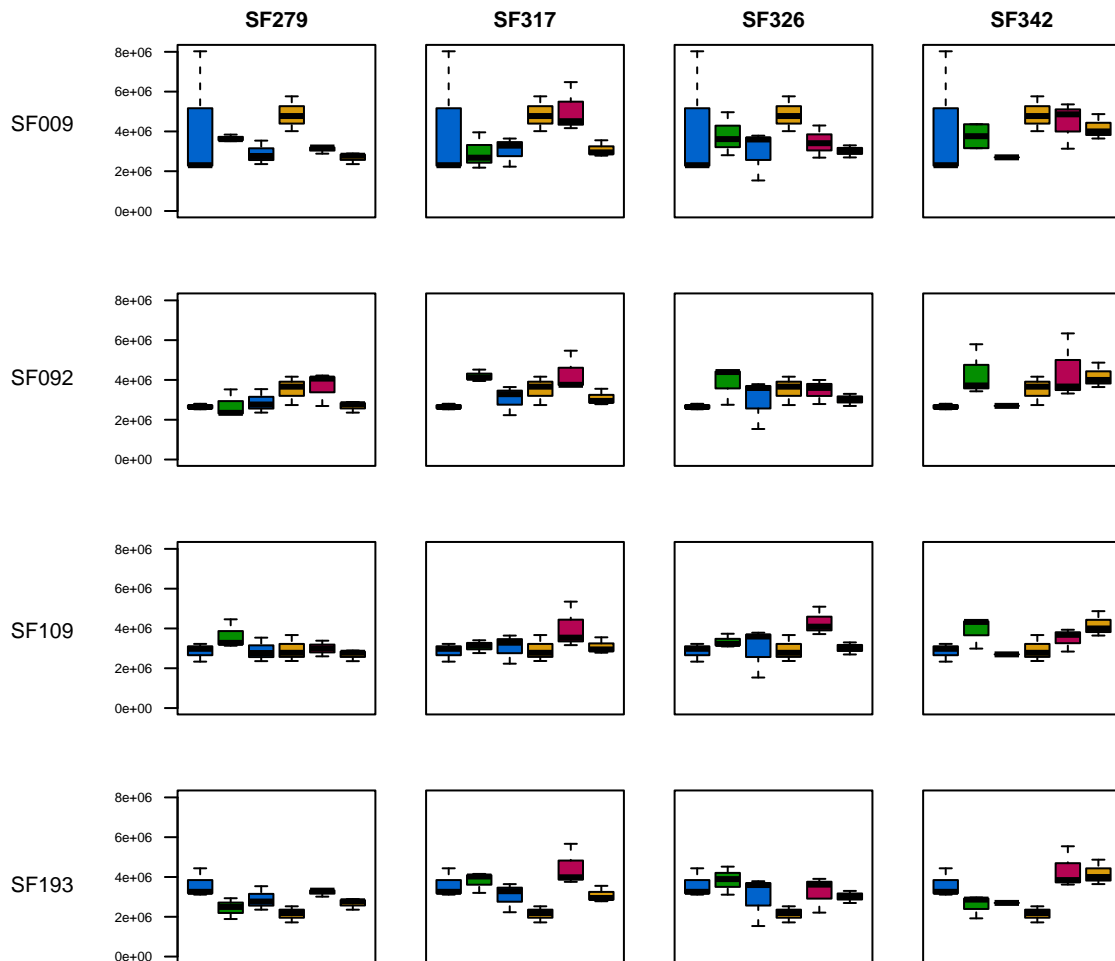

HanXRQChr14g0459361  
Probable ferritin-2, chloroplastic

Parents WW  
Parents WD  
Hybrids WW  
Hybrids WD

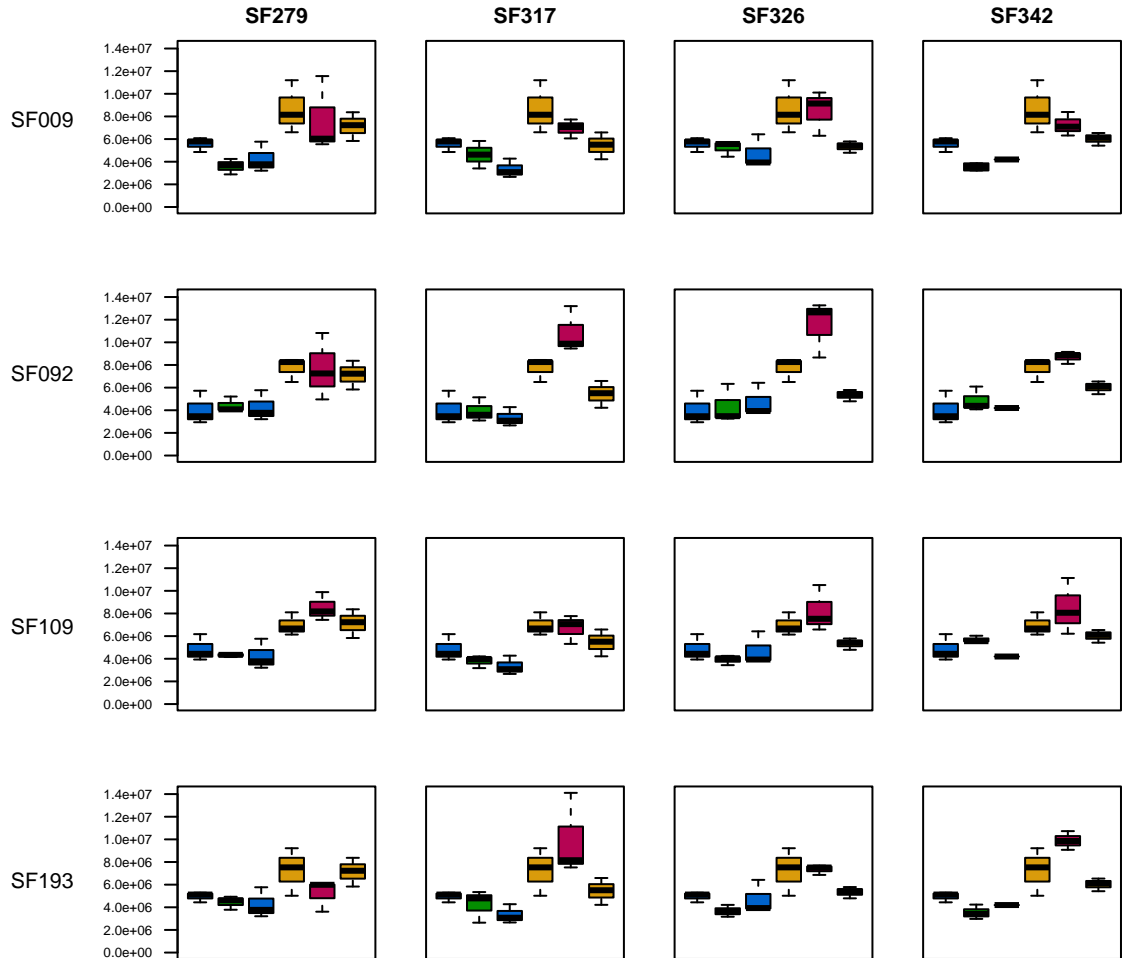

HanXRQChr14g0448791  
 Uncharacterized protein, conserved in  
 plant genome(s), supported by expression c

Parents WW  
 Parents WD  
 Hybrids WW  
 Hybrids WD

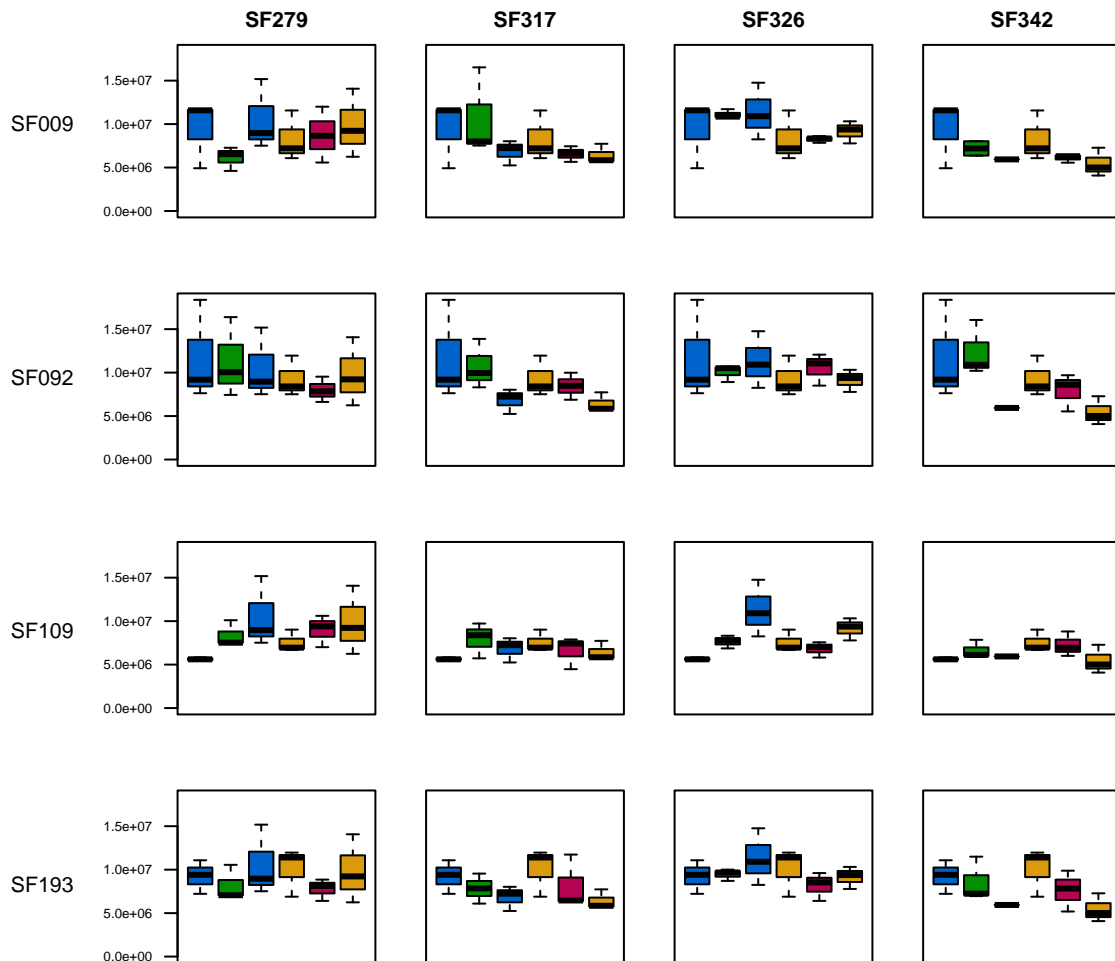

HanXRQChr14g0457241  
Probable serine carboxypeptidase-like 27

Parents WW  
Parents WD  
Hybrids WW  
Hybrids WD

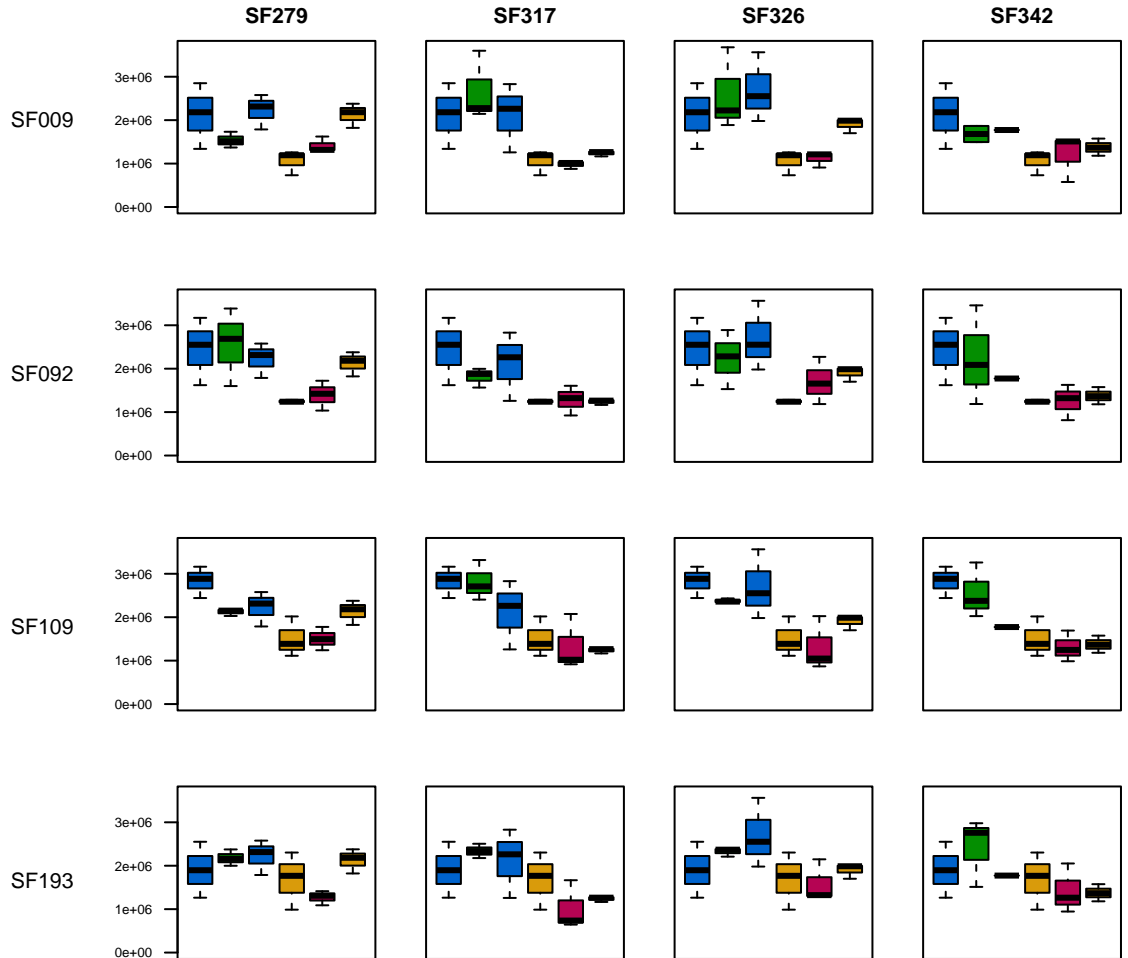



HanXRQChr16g0518791  
Putative nucleotide-binding alpha-beta  
plait domain

Parents WW  
Parents WD  
Hybrids WW  
Hybrids WD

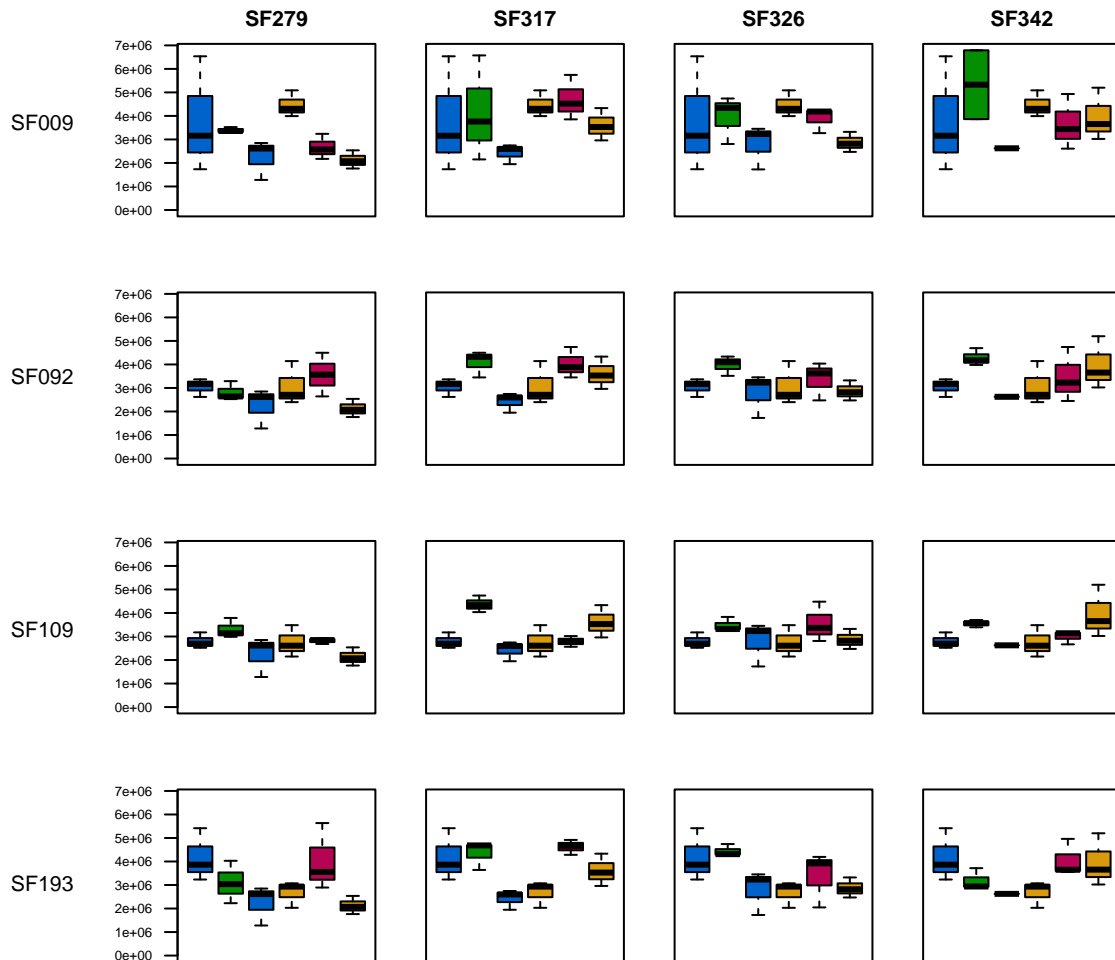

HanXRQChr13g0398501  
Putative nucleotide-binding alpha-beta  
plait domain

Parents WW  
Parents WD  
Hybrids WW  
Hybrids WD

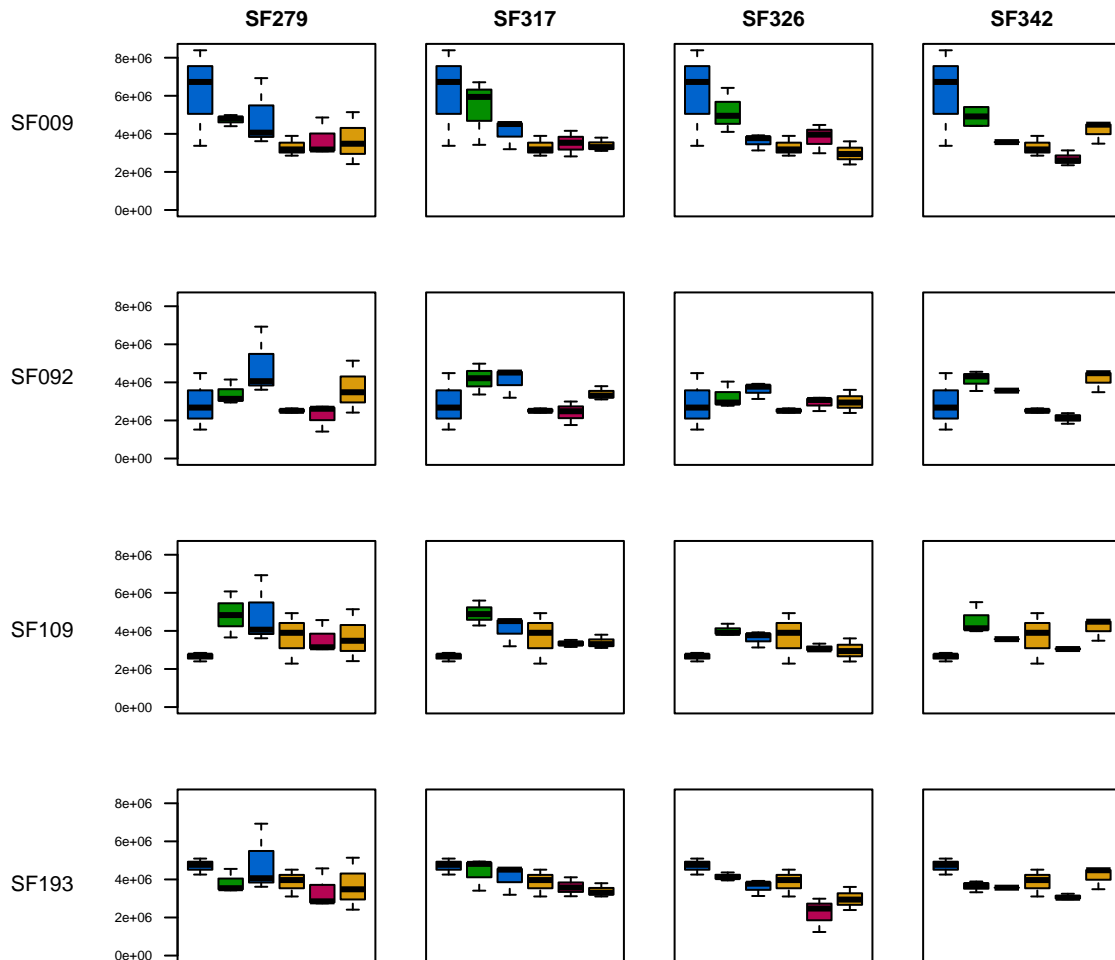

HanXRQChr01g0015591  
 Probable chlorophyll a-b binding  
 protein 21, chloroplastic

Parents WW  
 Parents WD  
 Hybrids WW  
 Hybrids WD

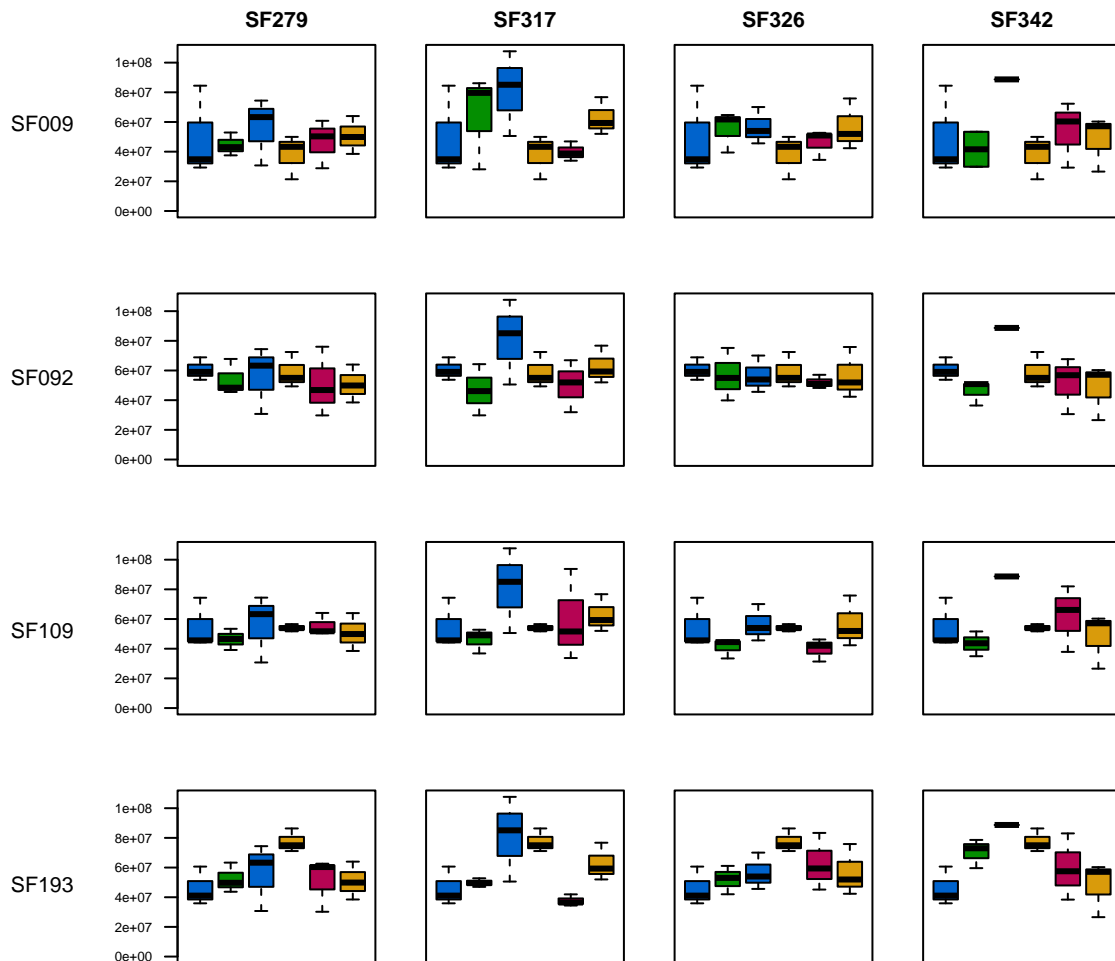

HanXRQChr06g0172671  
Putative plastid lipid-associated  
protein/fibrillin conserved domain

Parents WW  
Parents WD  
Hybrids WW  
Hybrids WD

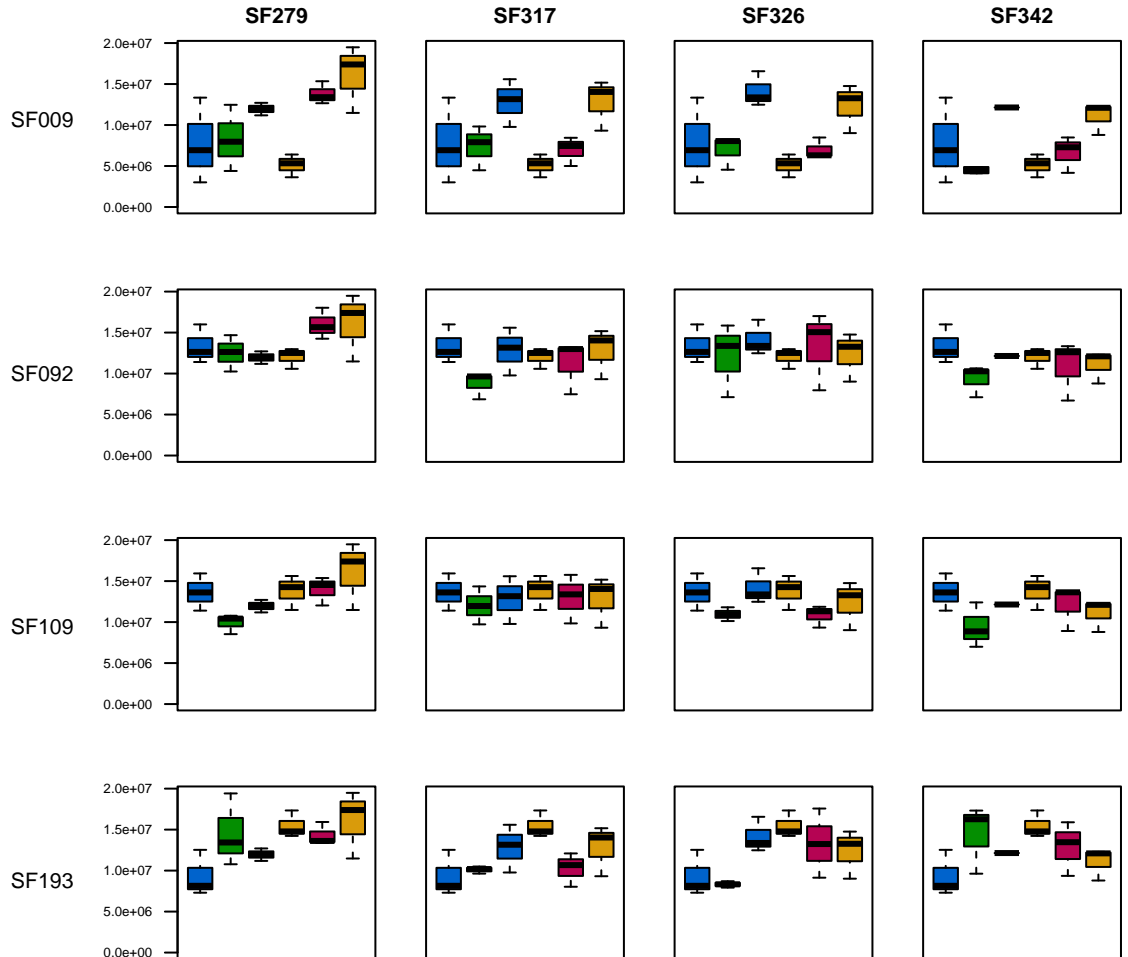

HanXRQChr04g0123791  
Putative dormancyauxin associated

- Parents WW
- Parents WD
- Hybrids WW
- Hybrids WD

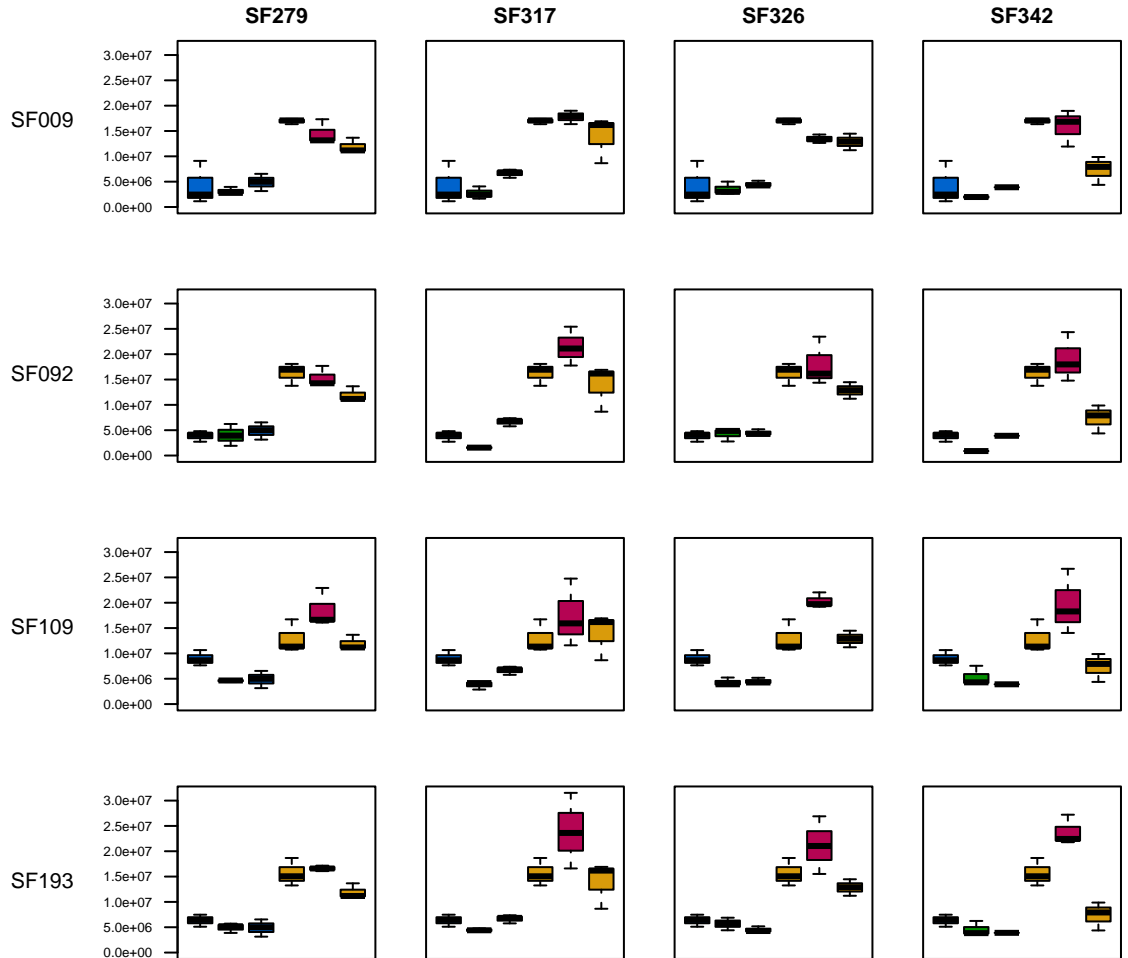

HanXRQChr07g0198871  
 Probable monodehydroascorbate reductase  
 4

Parents WW  
 Parents WD  
 Hybrids WW  
 Hybrids WD

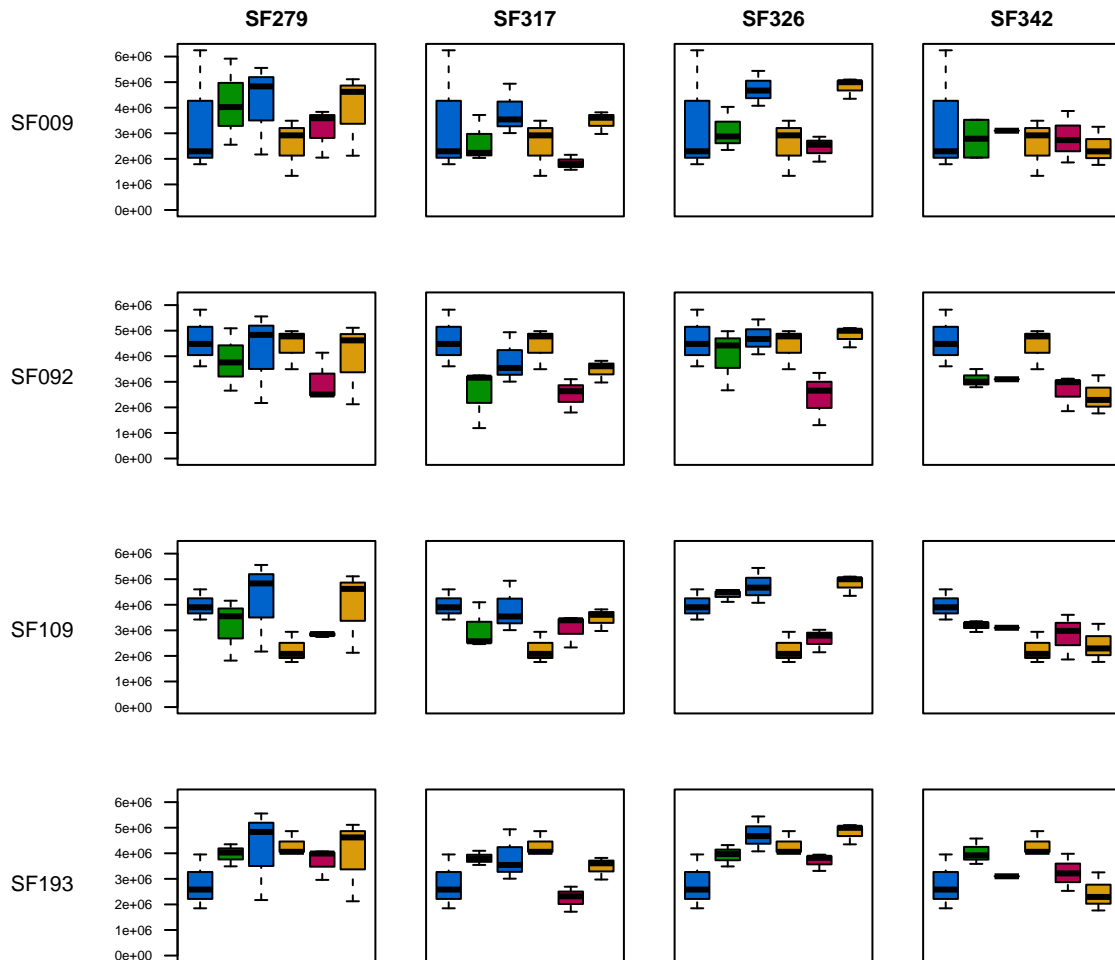

HanXRQChr08g0208091  
Probable alanine-2-oxoglutarate  
aminotransferase 2

Parents WW  
Parents WD  
Hybrids WW  
Hybrids WD

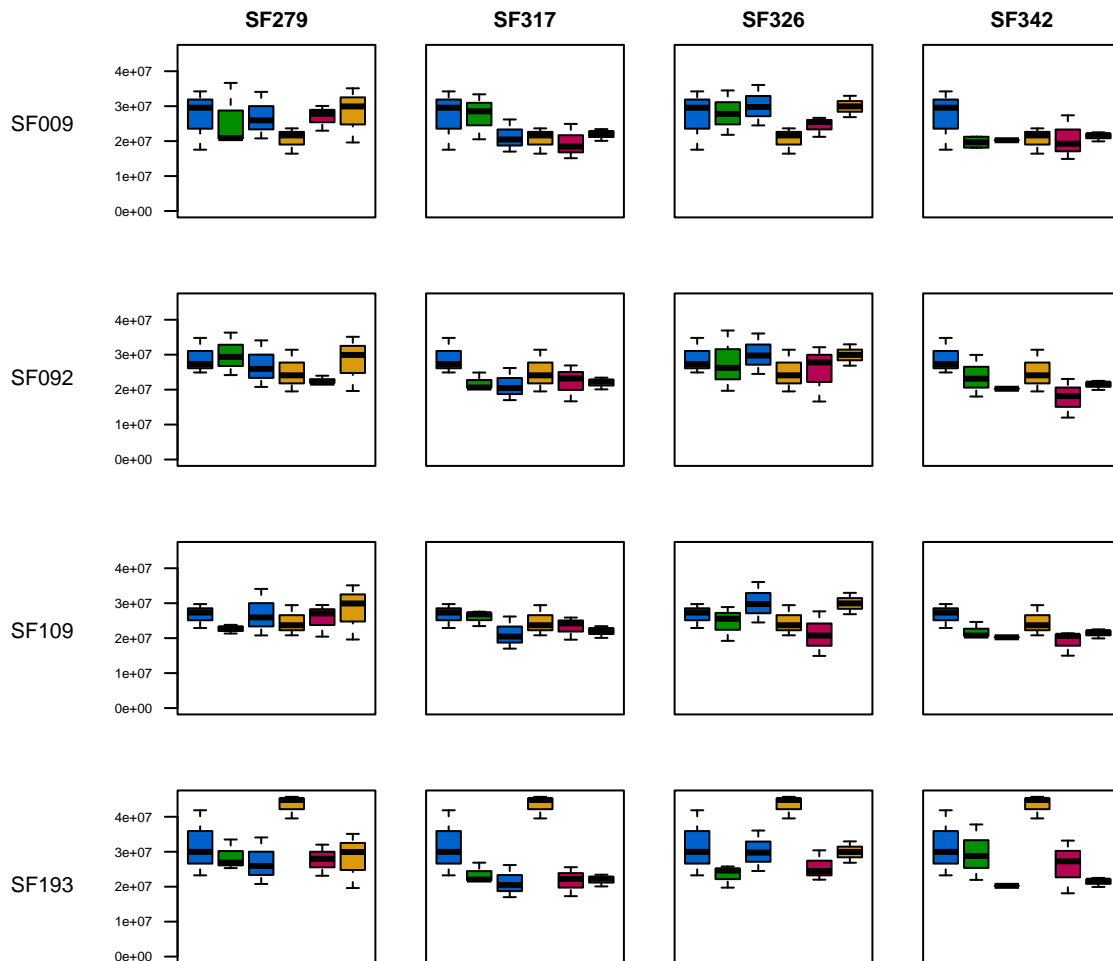

HanXRQChr14g0448551  
Probable FUNCTIONS IN:  
molecular\_function unknown

Parents WW  
Parents WD  
Hybrids WW  
Hybrids WD

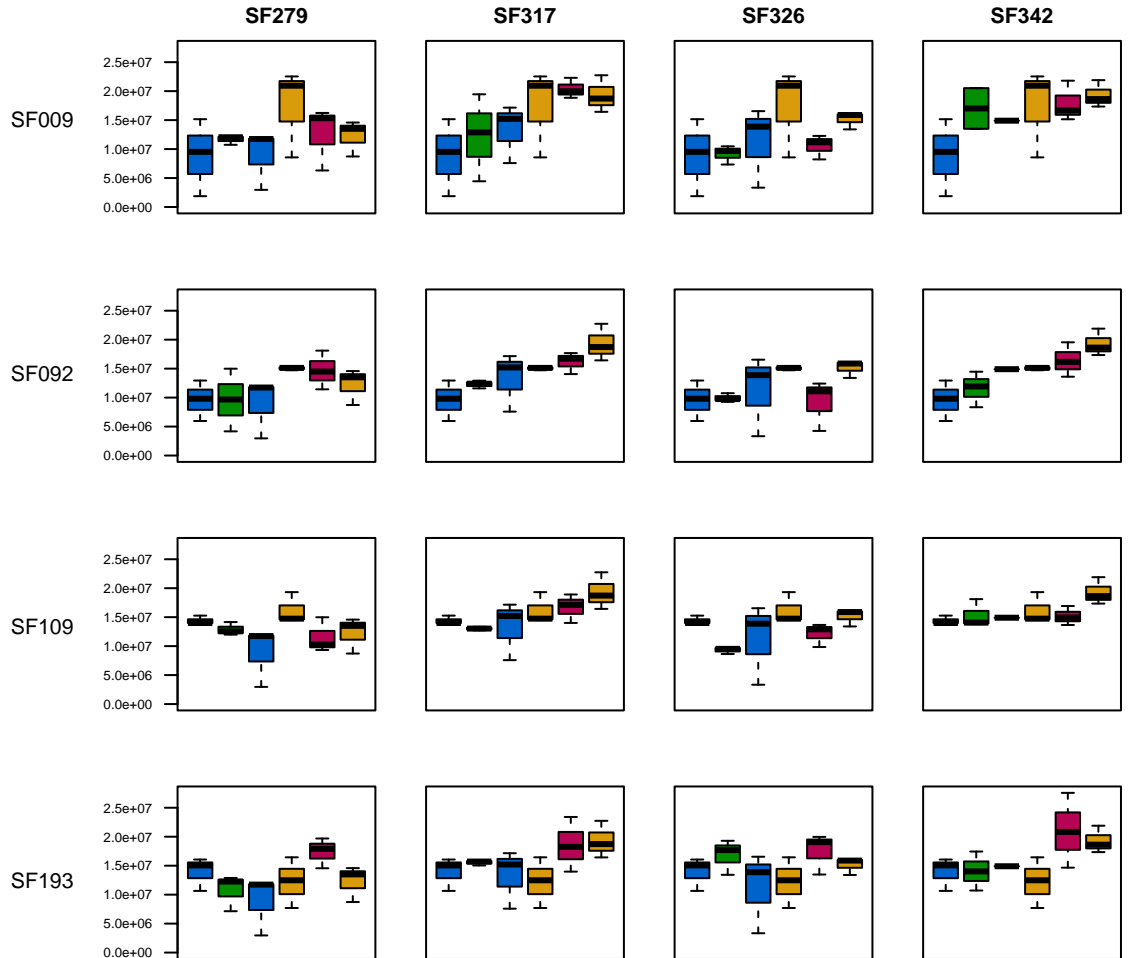



HanXRQChr12g0354261  
Probable sucrose synthase isoform 1

- Parents WW
- Parents WD
- Hybrids WW
- Hybrids WD

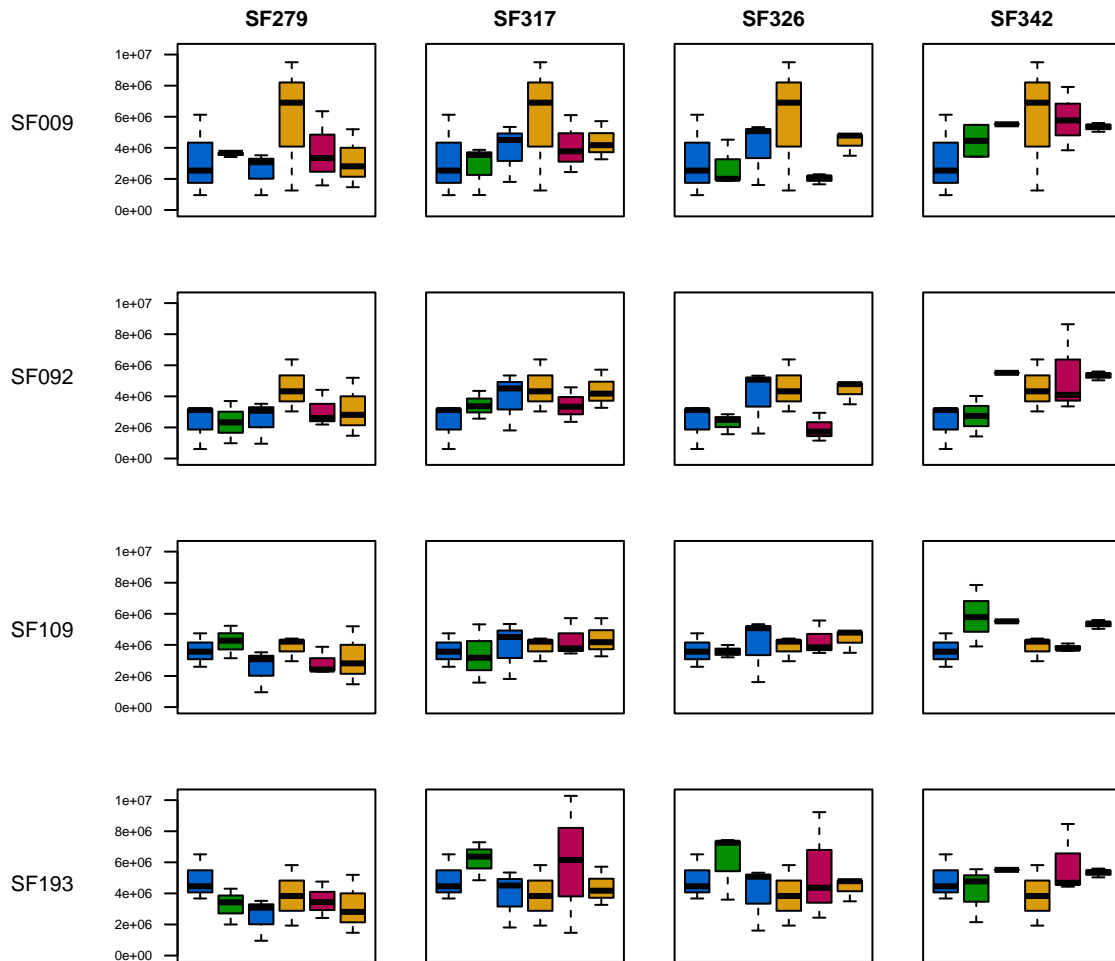

HanXRQChr10g0284601  
 Putative chloroplast protein import  
 component Toc86/159; Translocase of chlor

Parents WW  
 Parents WD  
 Hybrids WW  
 Hybrids WD

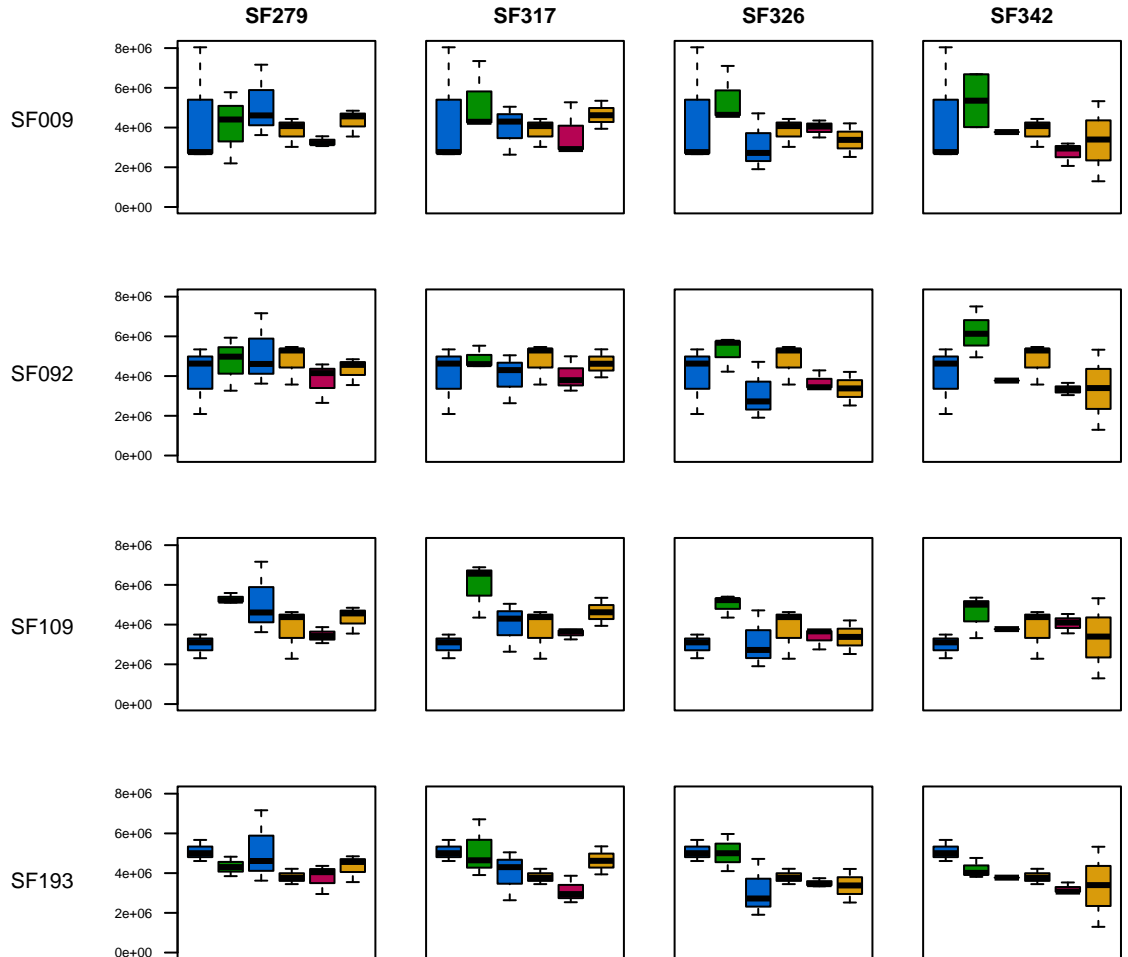

HanXRQChr12g0356351  
Probable FAD/NAD(P)-binding  
oxidoreductase

Parents WW  
Parents WD  
Hybrids WW  
Hybrids WD

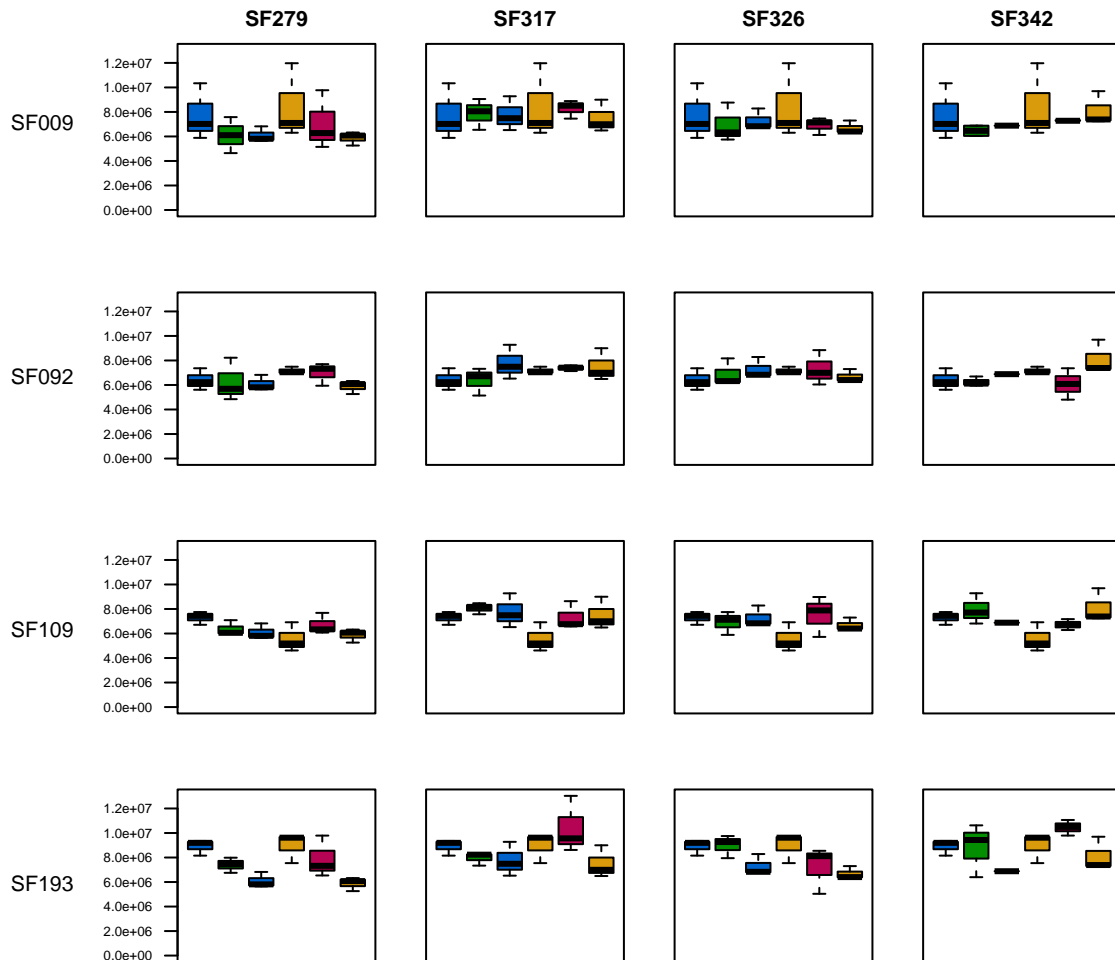

HanXRQChr00c0055g0571381  
 Putative ATPase, F1 complex, alpha  
 subunit; ATP synthase subunit beta, bacteri

Parents WW  
 Parents WD  
 Hybrids WW  
 Hybrids WD

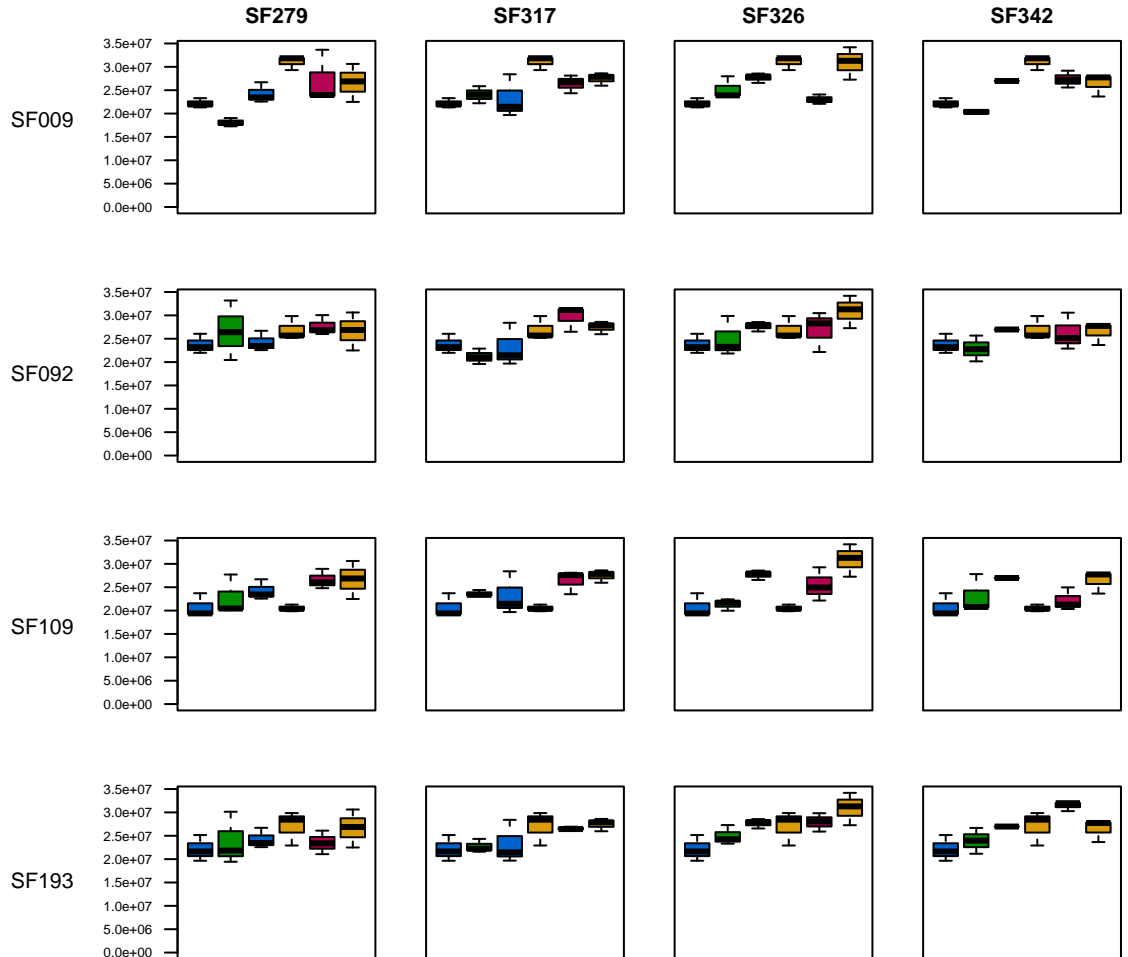

HanXRQChr01g0019421  
Probable plasma membrane intrinsic  
protein 2

Parents WW  
Parents WD  
Hybrids WW  
Hybrids WD

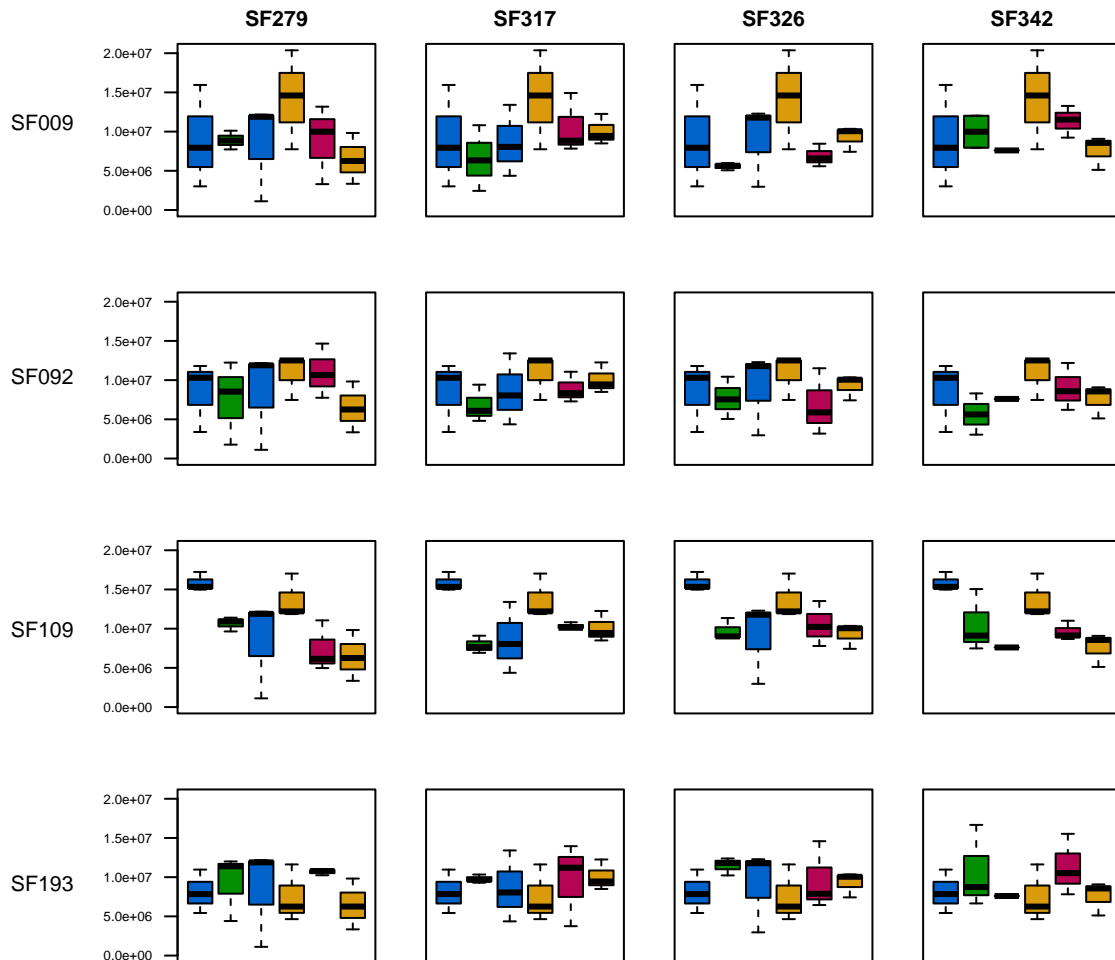

HanXRQChr01g0014941  
Probable NAD(P)-binding Rossmann-fold  
superfamily protein

Parents WW  
Parents WD  
Hybrids WW  
Hybrids WD

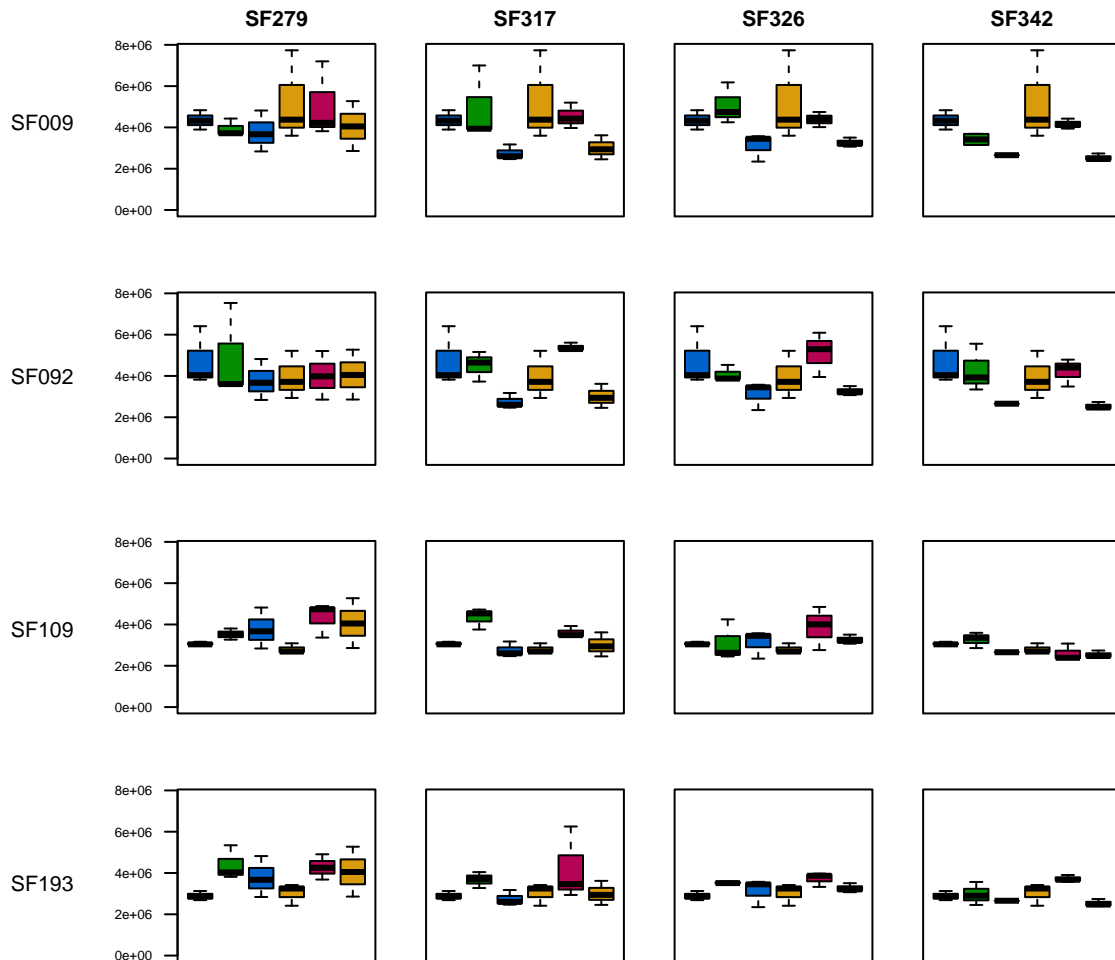

HanXRQChr11g0325011  
Probable ribulose biphosphate  
carboxylase small chain 4, chloroplastic

Parents WW  
Parents WD  
Hybrids WW  
Hybrids WD

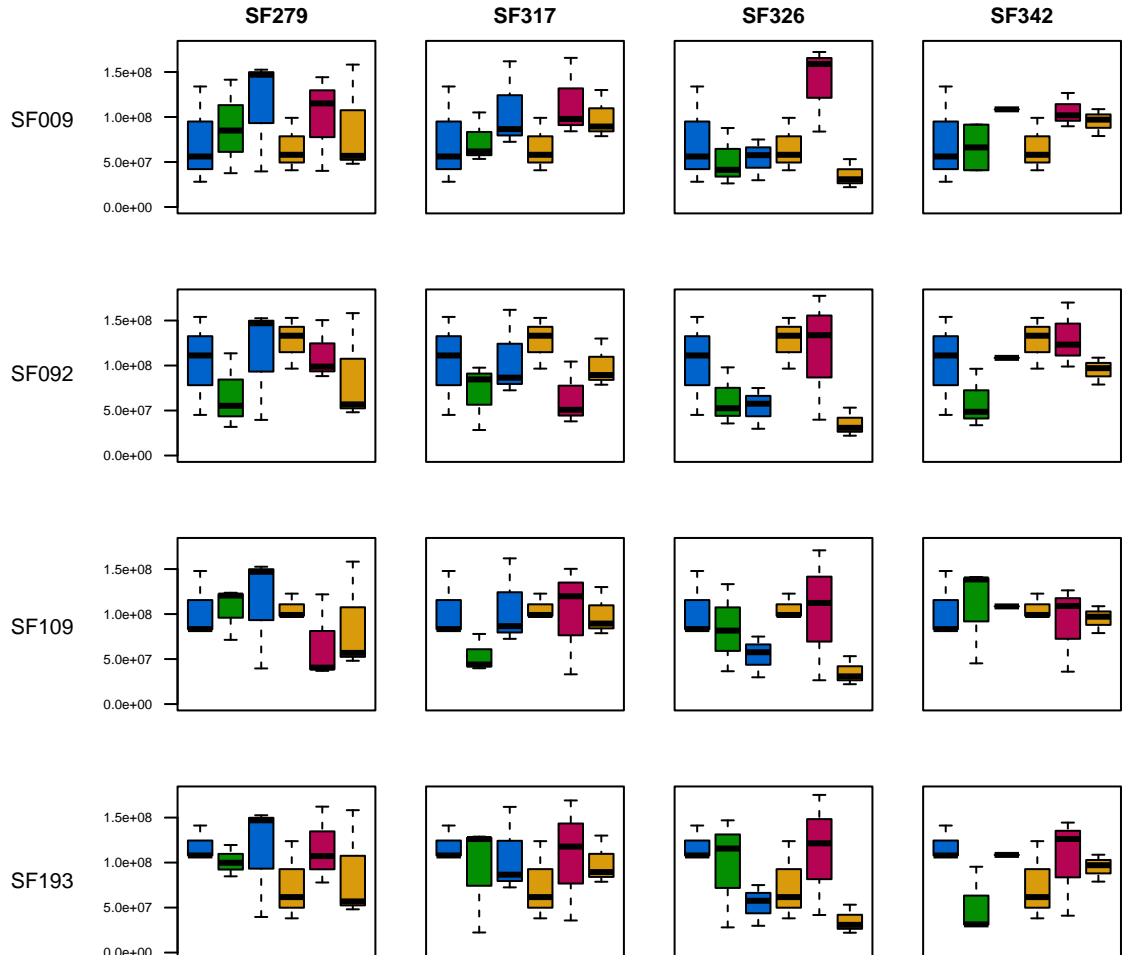

HanXRQChr08g0212971  
Probable ATP synthase subunit beta,  
mitochondrial

Parents WW  
Parents WD  
Hybrids WW  
Hybrids WD

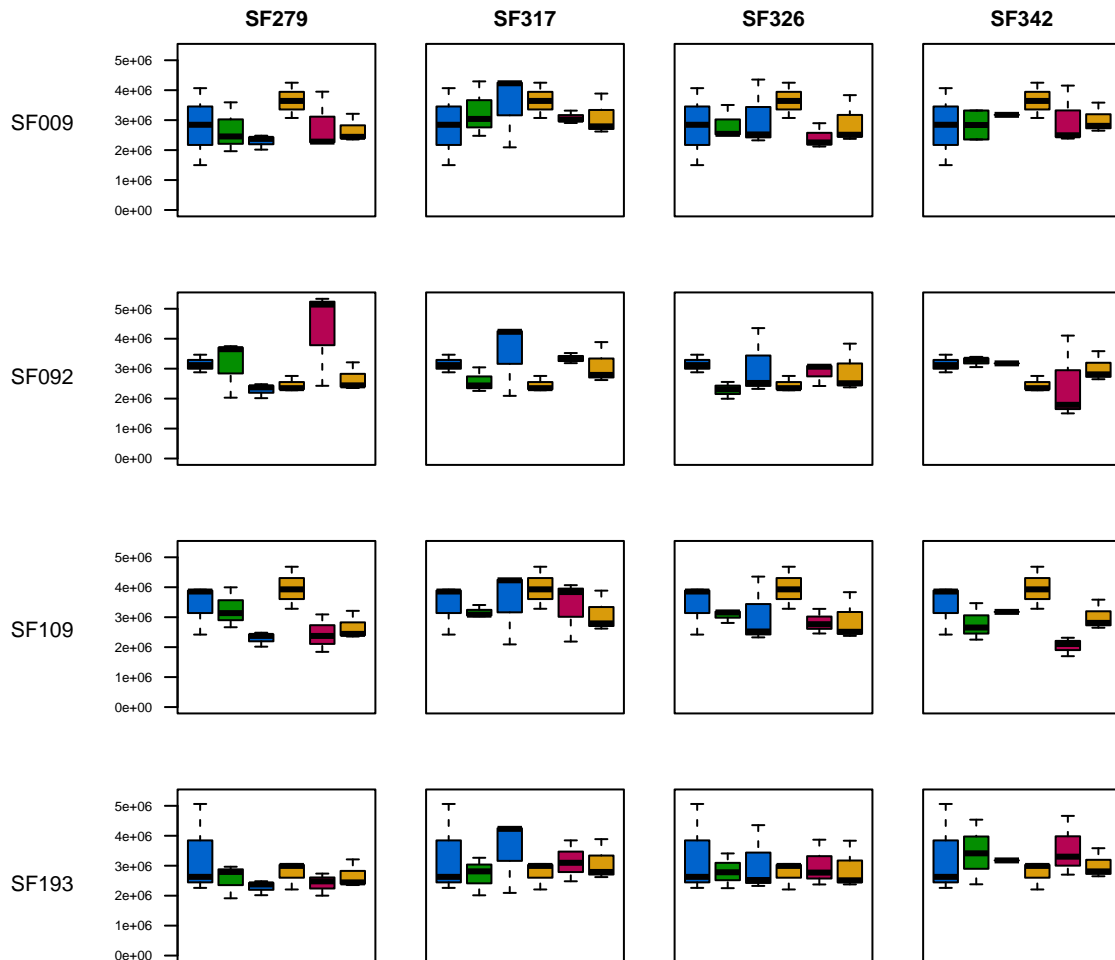



HanXRQChr15g0494291  
Probable chloroplastic lipocalin

Parents WW  
Parents WD  
Hybrids WW  
Hybrids WD

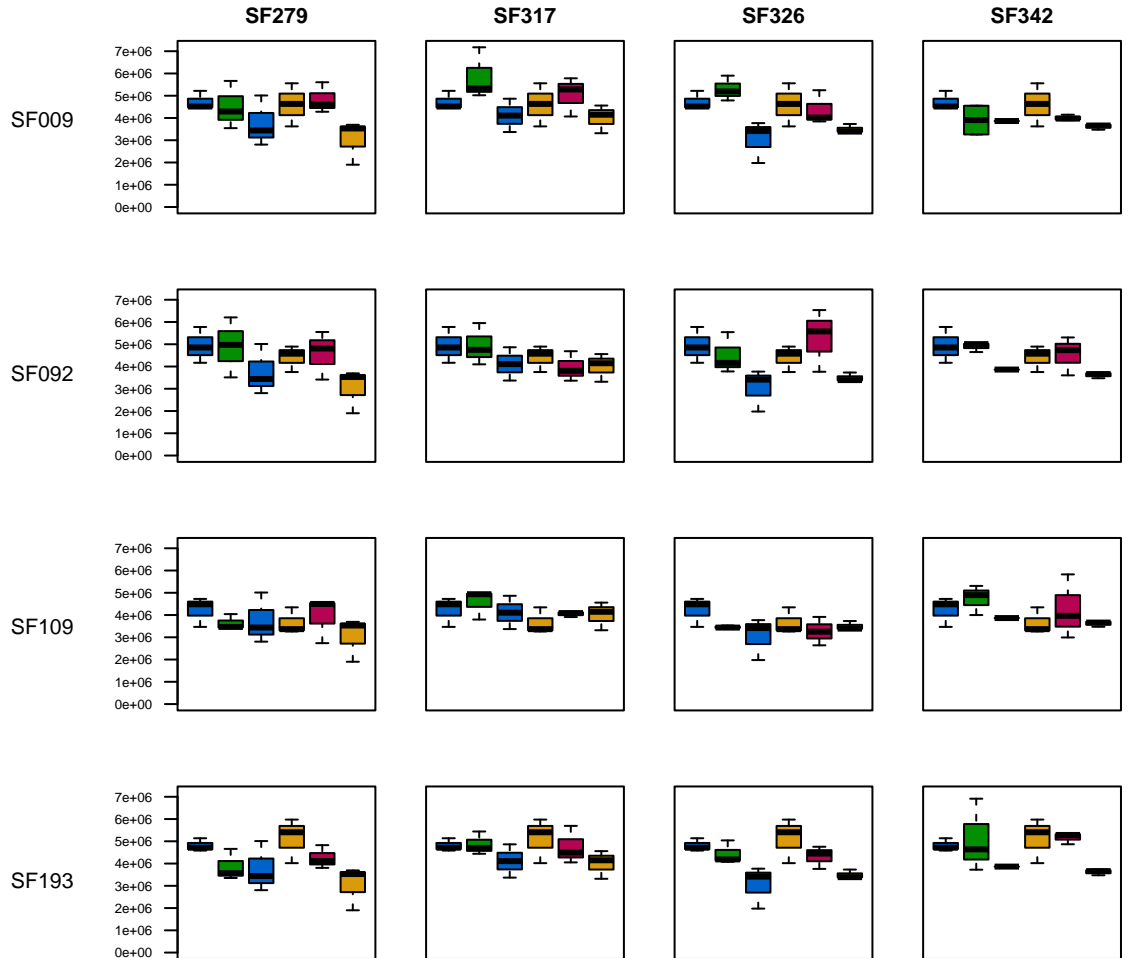

HanXRQChr06g0183721  
Probable calnexin 1

Parents WW  
Parents WD  
Hybrids WW  
Hybrids WD

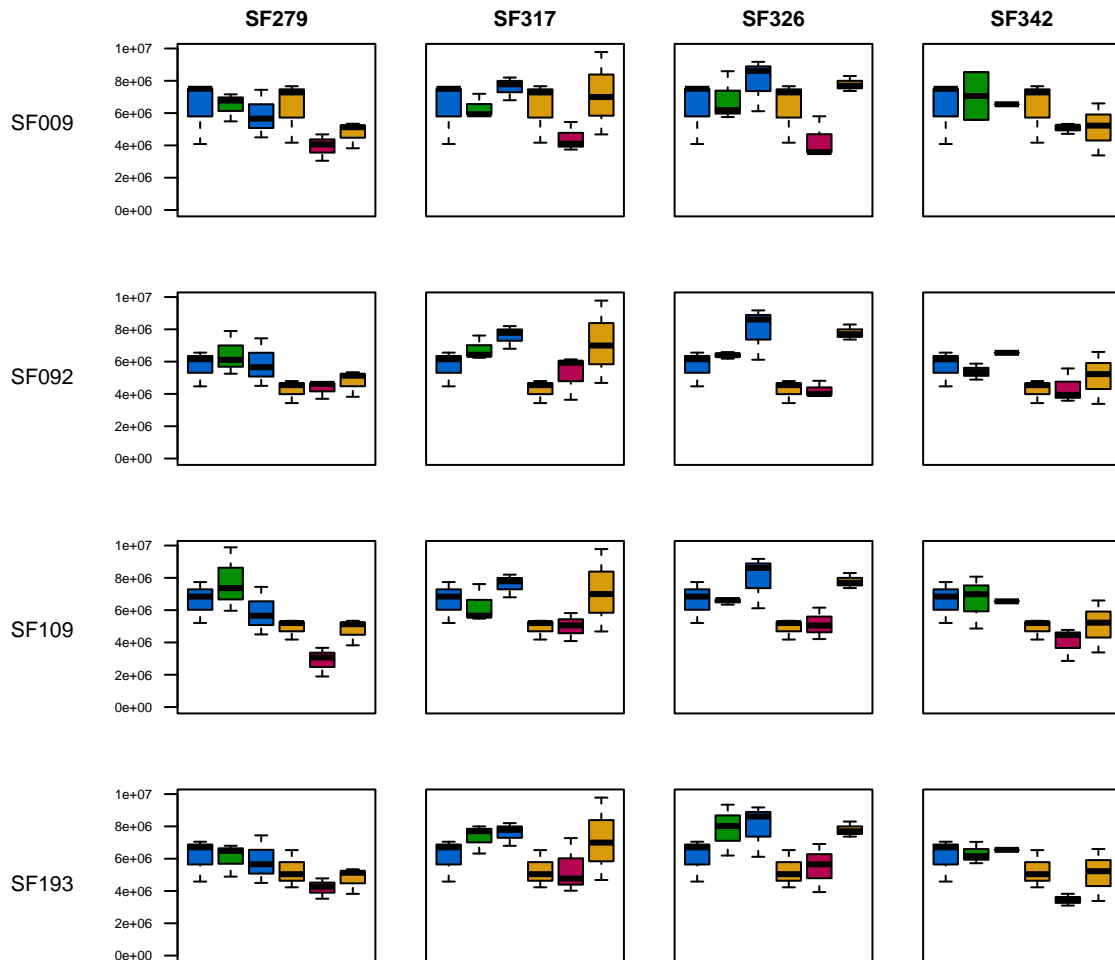

HanXRQChr13g0399791  
Probable glutathione transferase lambda  
1

Parents WW  
Parents WD  
Hybrids WW  
Hybrids WD

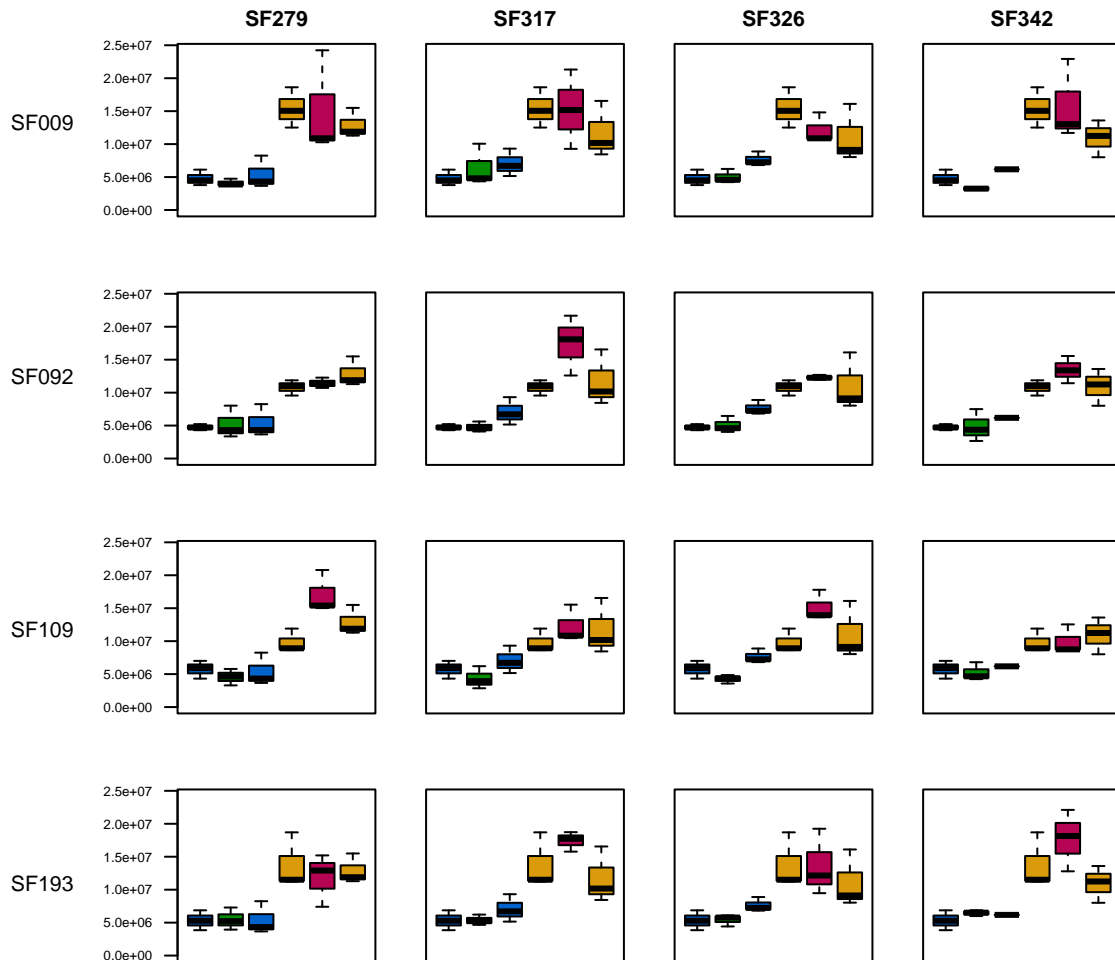

HanXRQChr13g0408351  
Probable heat shock protein 81-2

Parents WW  
Parents WD  
Hybrids WW  
Hybrids WD

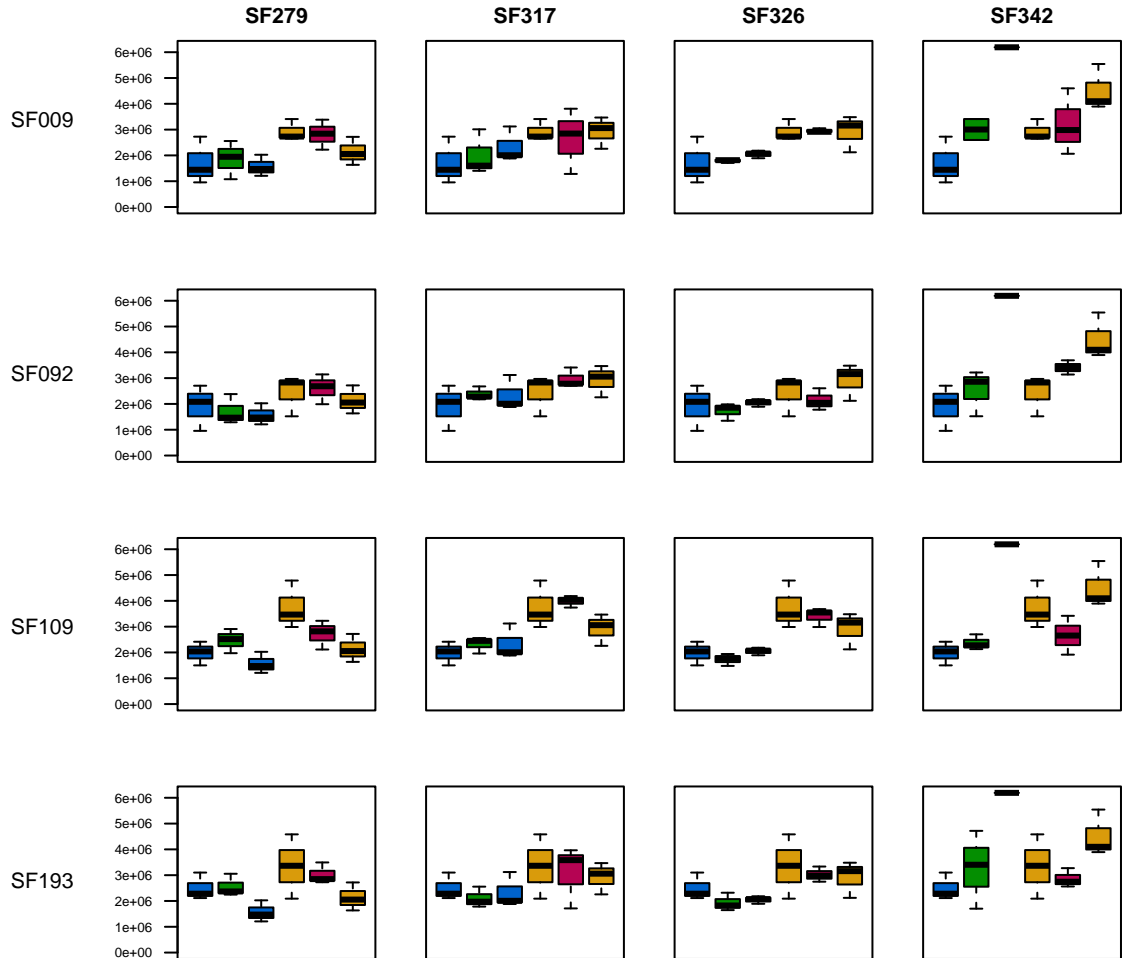

HanXRQChr03g0079131  
Probable phosphoenolpyruvate  
carboxylase 1

Parents WW  
Parents WD  
Hybrids WW  
Hybrids WD

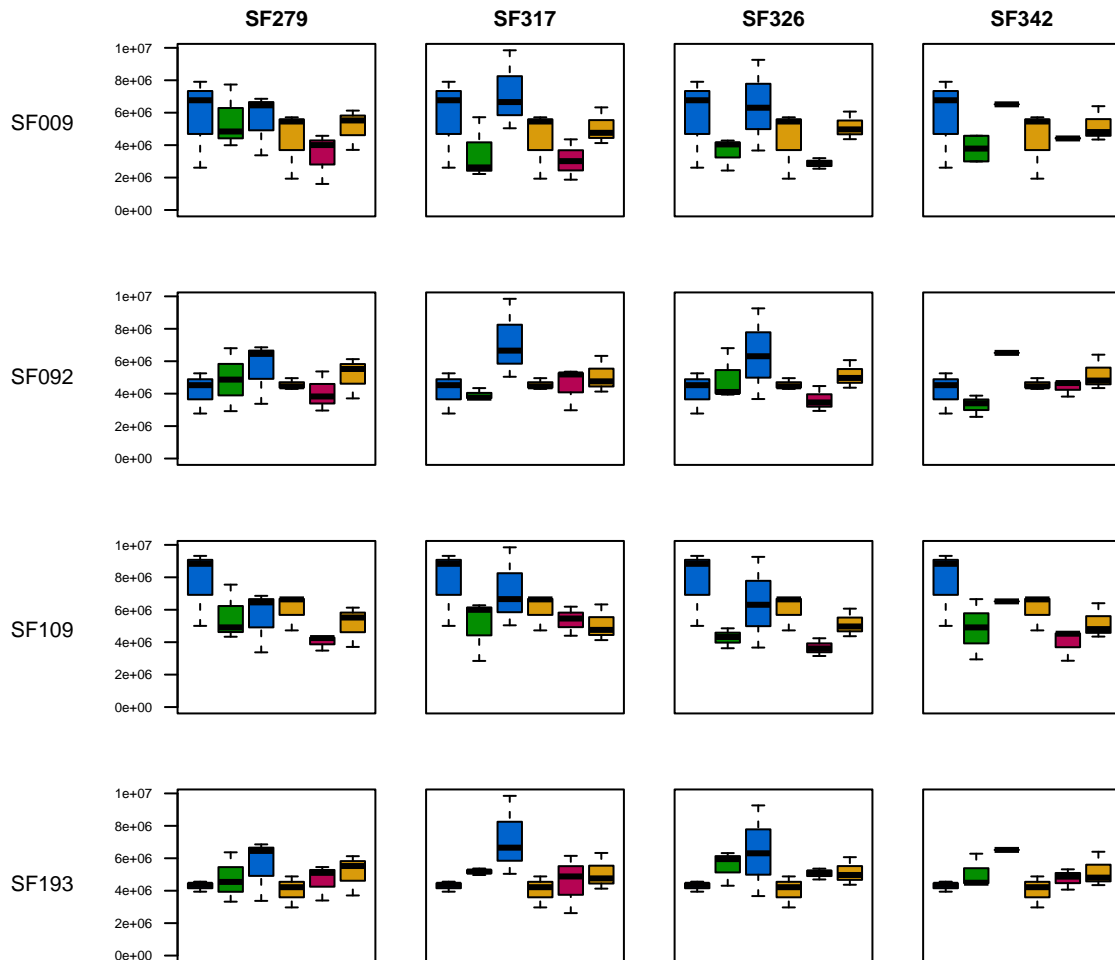

HanXRQChr17g0553881  
Putative zinc finger, CCHC-type; Cold  
shock, CspA

Parents WW  
Parents WD  
Hybrids WW  
Hybrids WD

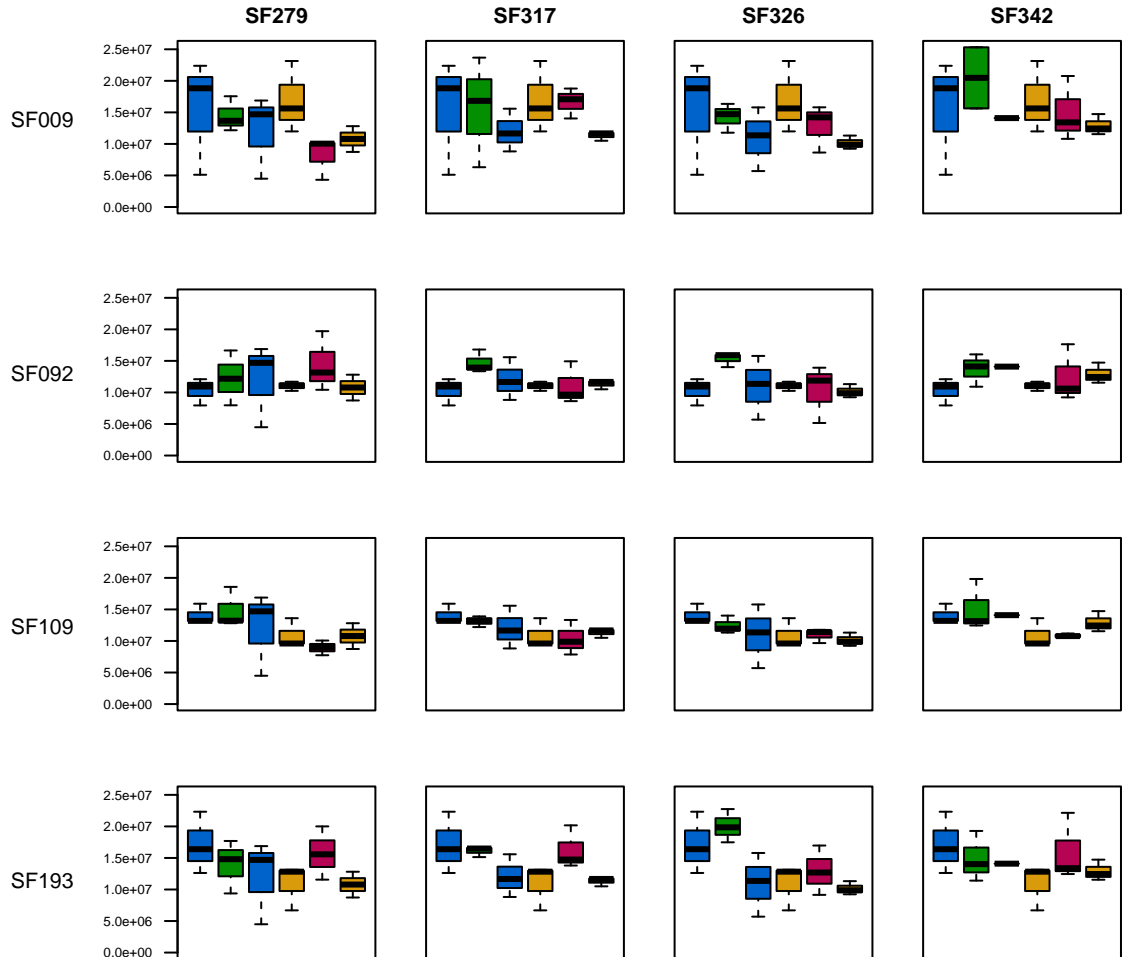

HanXRQChr13g0398861  
Putative cobalamin-independent  
methionine synthase

Parents WW  
Parents WD  
Hybrids WW  
Hybrids WD

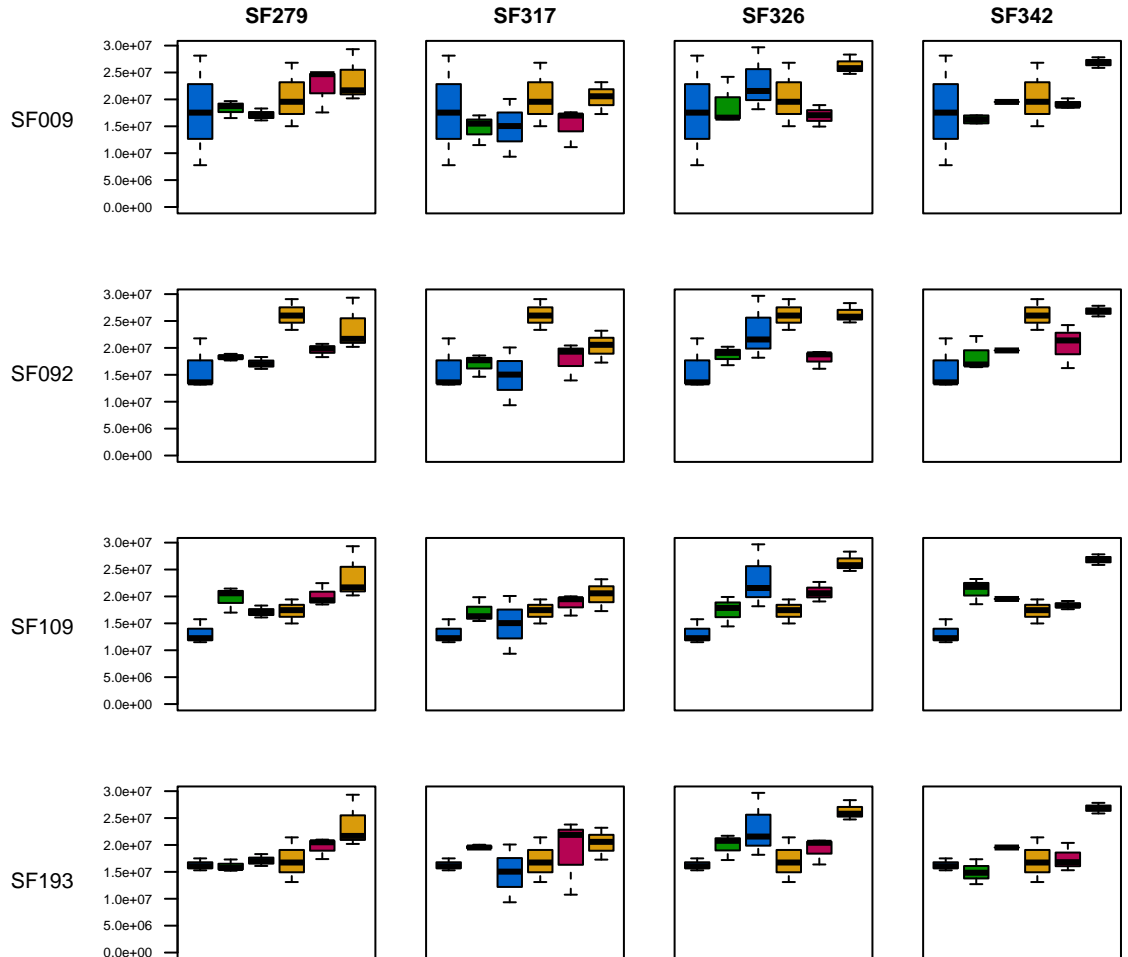

HanXRQChr04g0102091  
Putative heat shock chaperonin-binding

Parents WW  
Parents WD  
Hybrids WW  
Hybrids WD

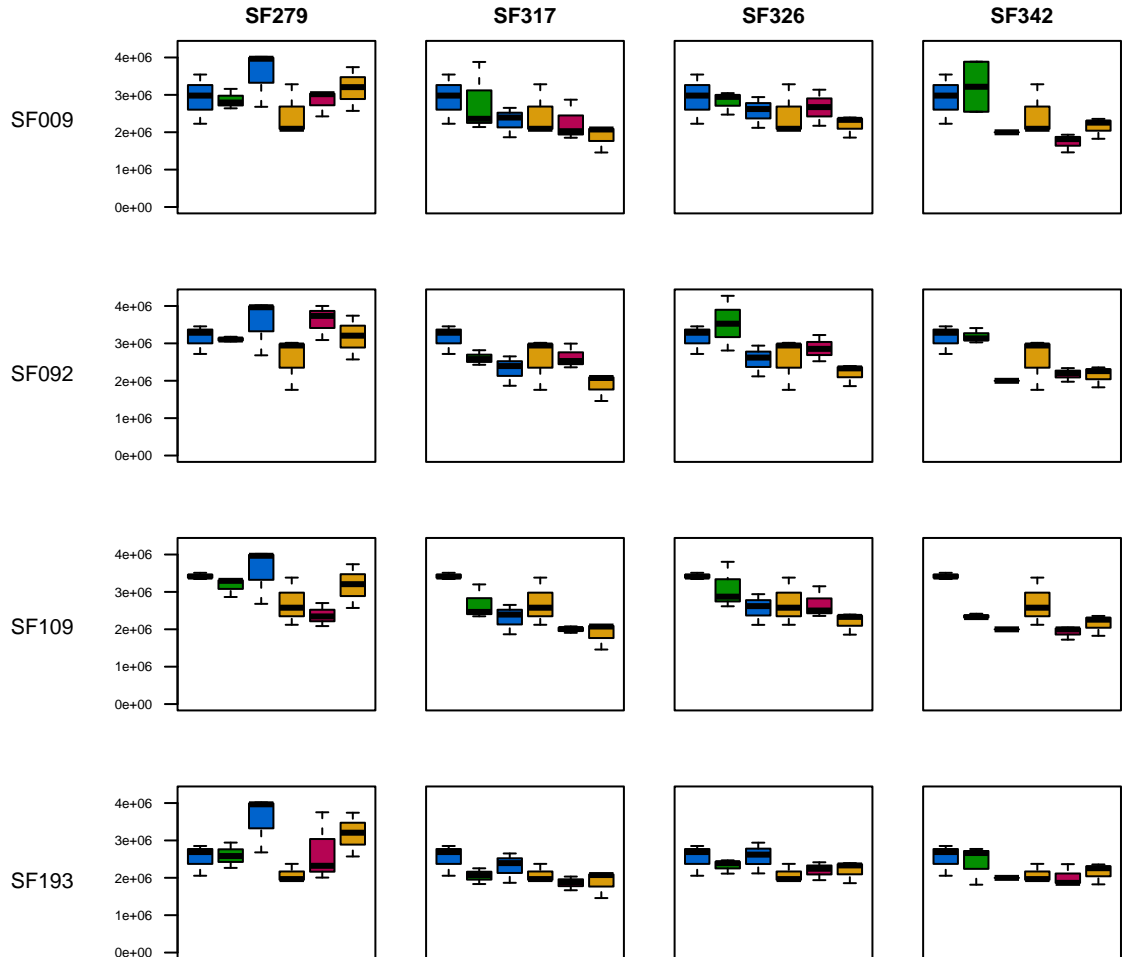



HanXRQCPg0580221  
Putative ribosomal protein L22/L17;  
Ribosomal protein S3, eukaryotic/archaeal;

Parents WW  
Parents WD  
Hybrids WW  
Hybrids WD

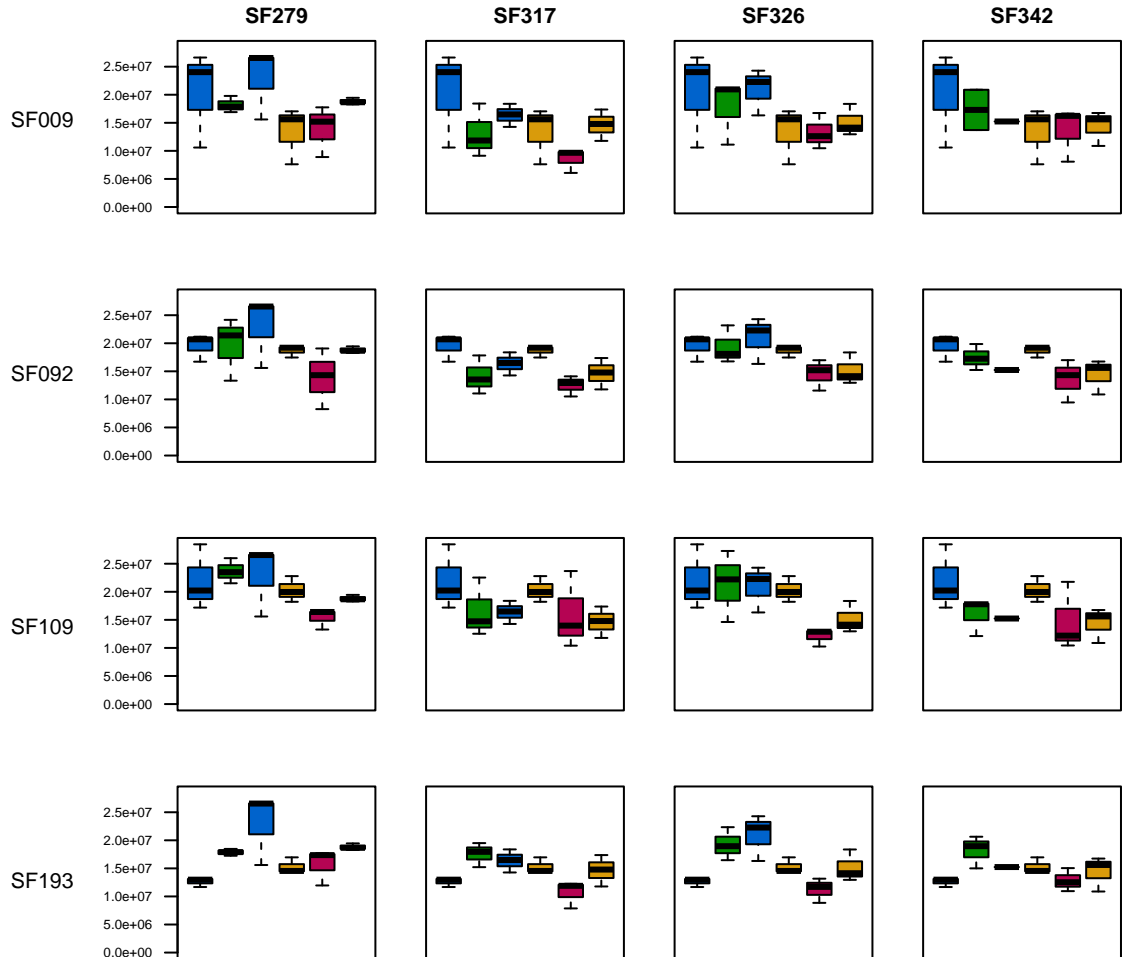

HanXRQChr05g0132711  
Probable carbamoyl-phosphate synthase  
small chain, chloroplastic

Parents WW  
Parents WD  
Hybrids WW  
Hybrids WD

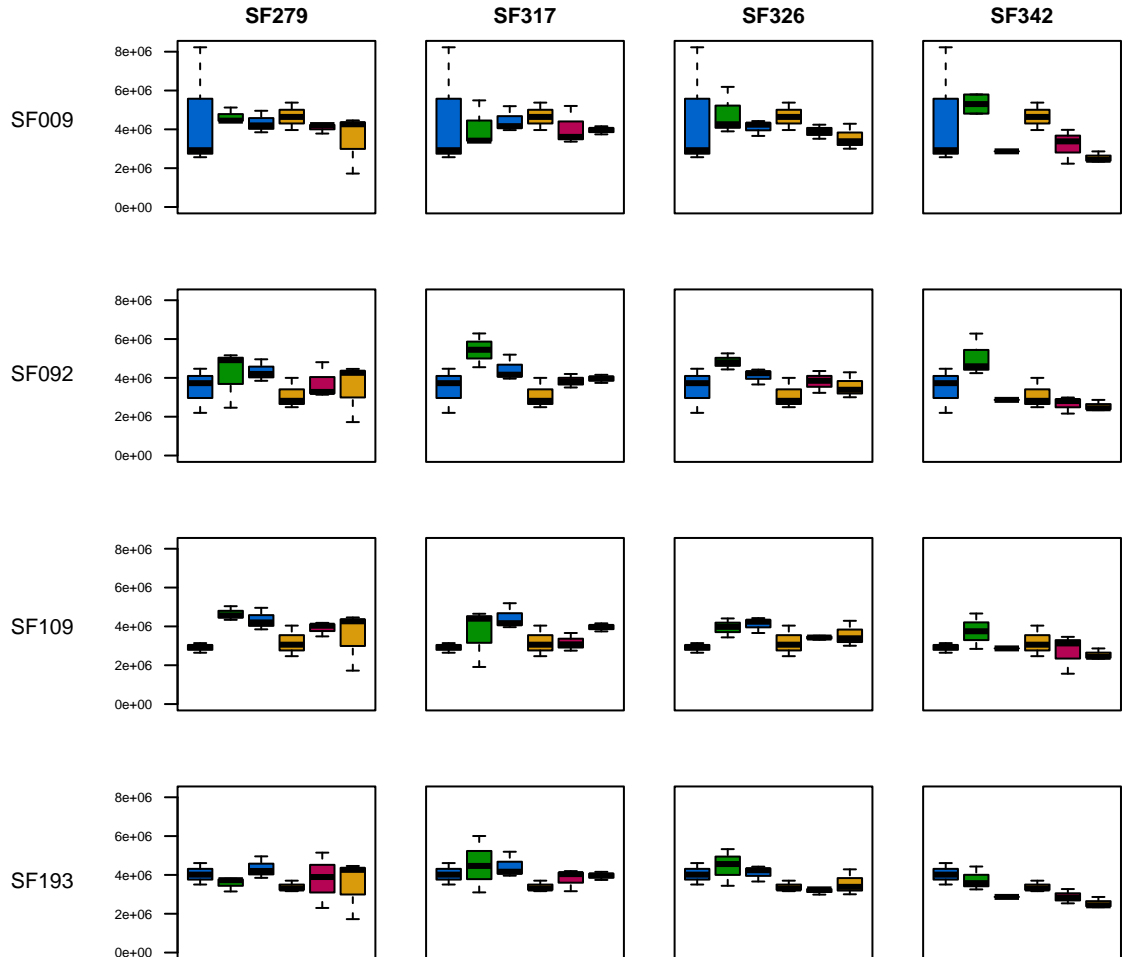

HanXRQChr05g0140271  
Probable bolA-like family protein

Parents WW  
Parents WD  
Hybrids WW  
Hybrids WD

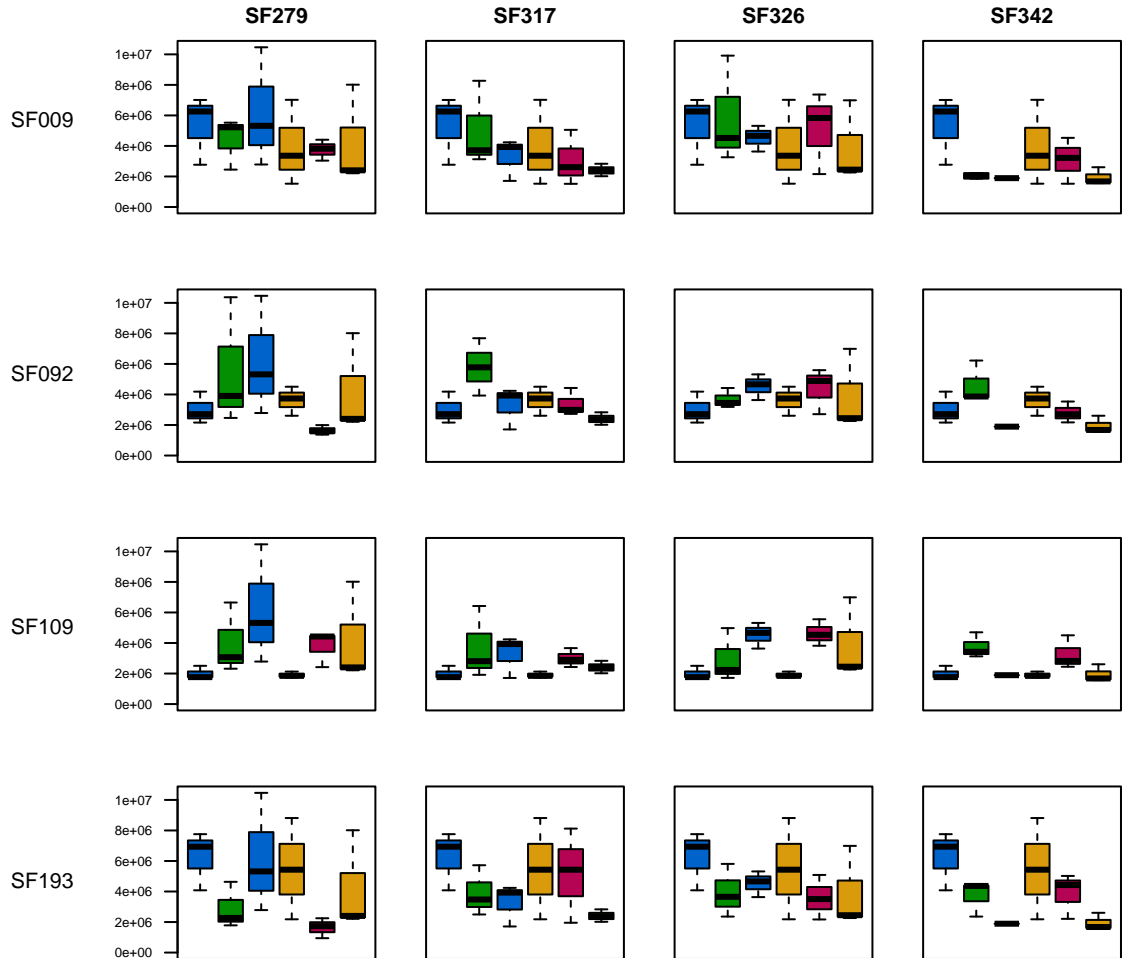

HanXRQChr06g0182631  
Putative LSM domain

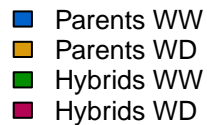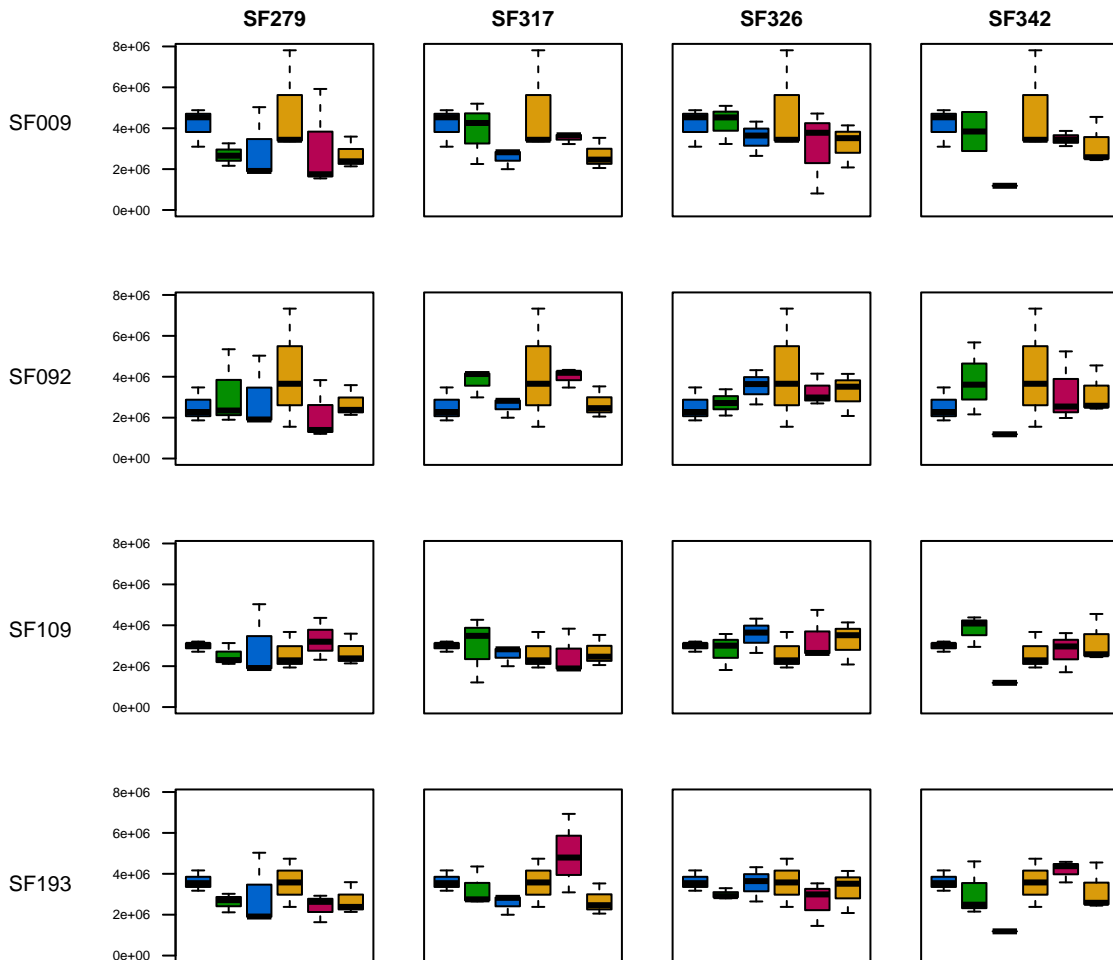

HanXRQChr14g0444501  
Probable dehydroascorbate reductase 1

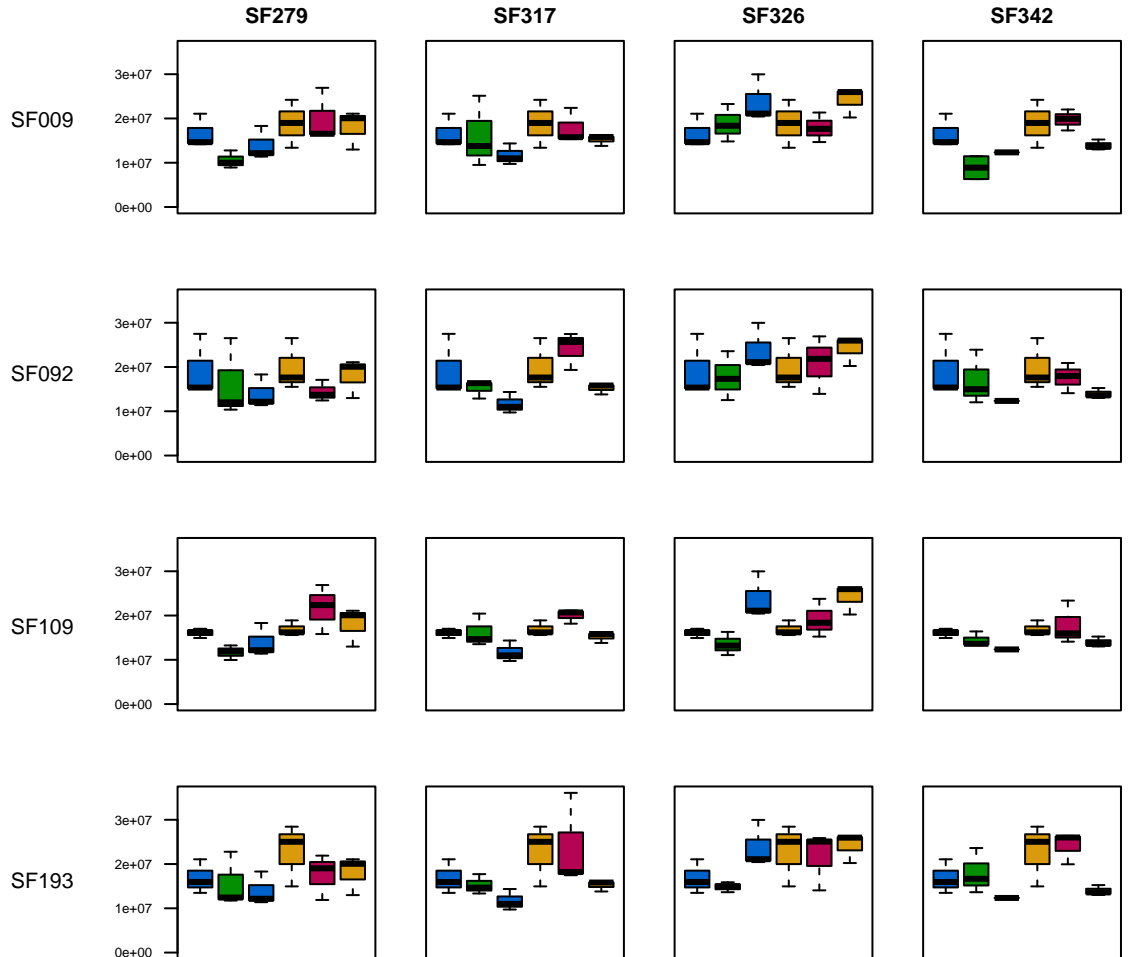

HanXRQChr06g0175781  
 Probable RNA-binding (RRM/RBD/RNP  
 motifs) family protein

Parents WW  
 Parents WD  
 Hybrids WW  
 Hybrids WD

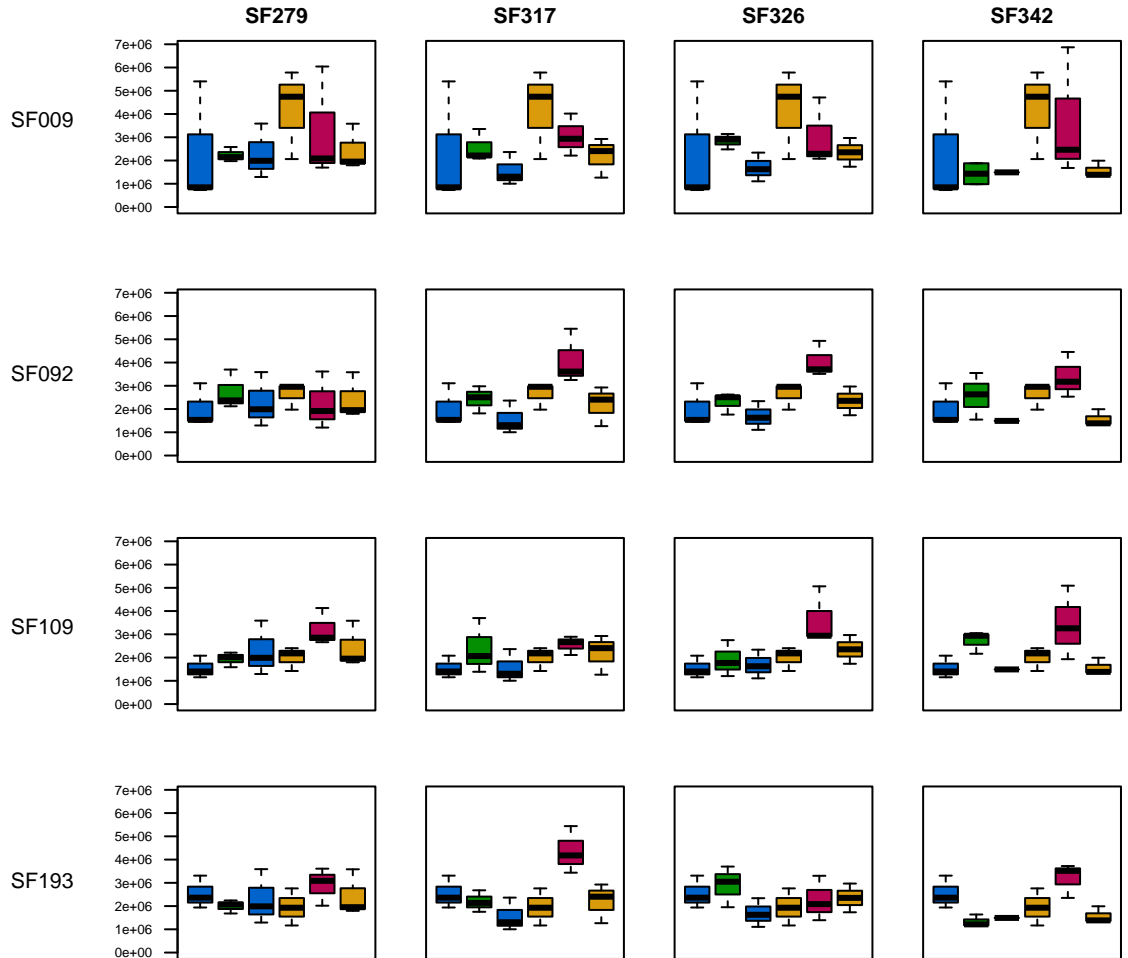

HanXRQChr16g0525591  
Probable transketolase family protein

Parents WW  
Parents WD  
Hybrids WW  
Hybrids WD

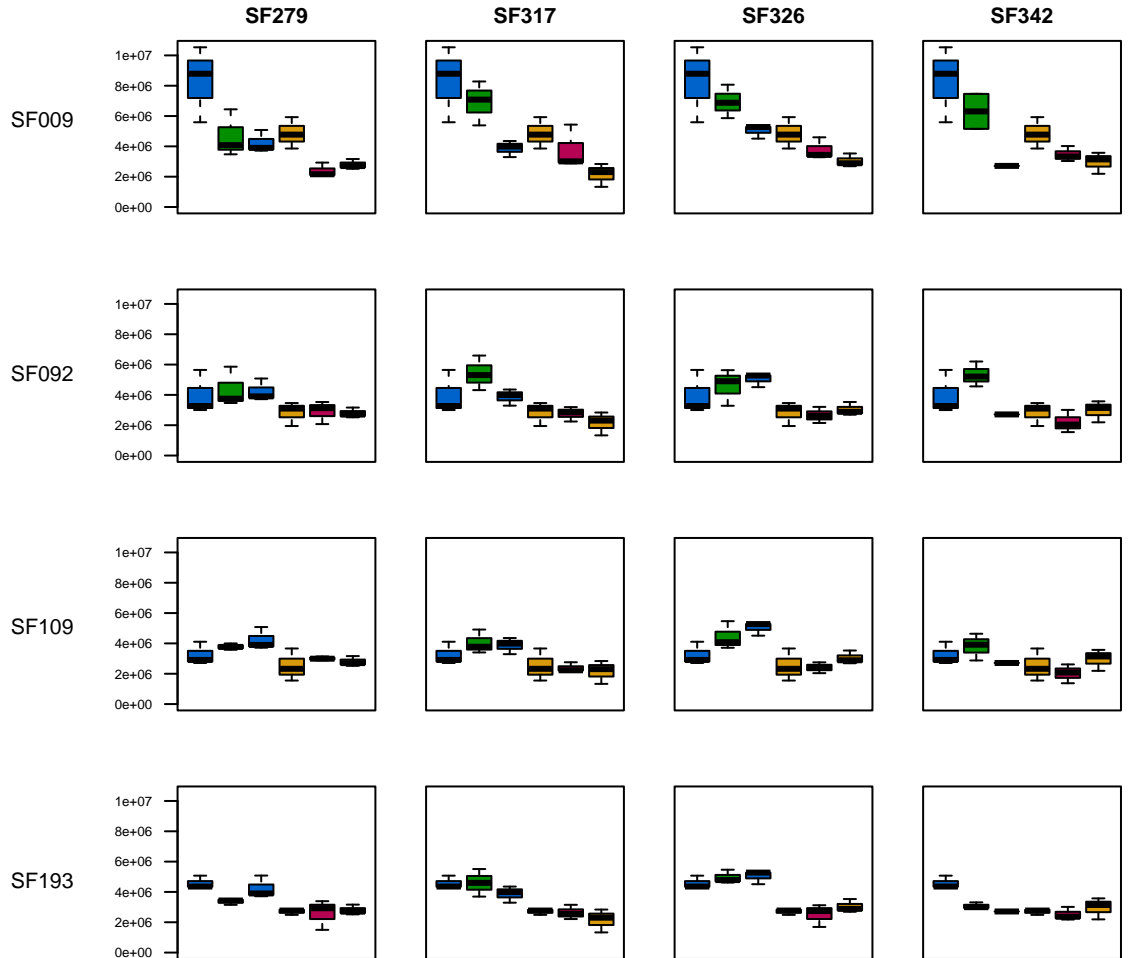

HanXRQChr14g0455221  
Putative pyridoxal phosphate-dependent  
transferase; Threonine aldolase

Parents WW  
Parents WD  
Hybrids WW  
Hybrids WD

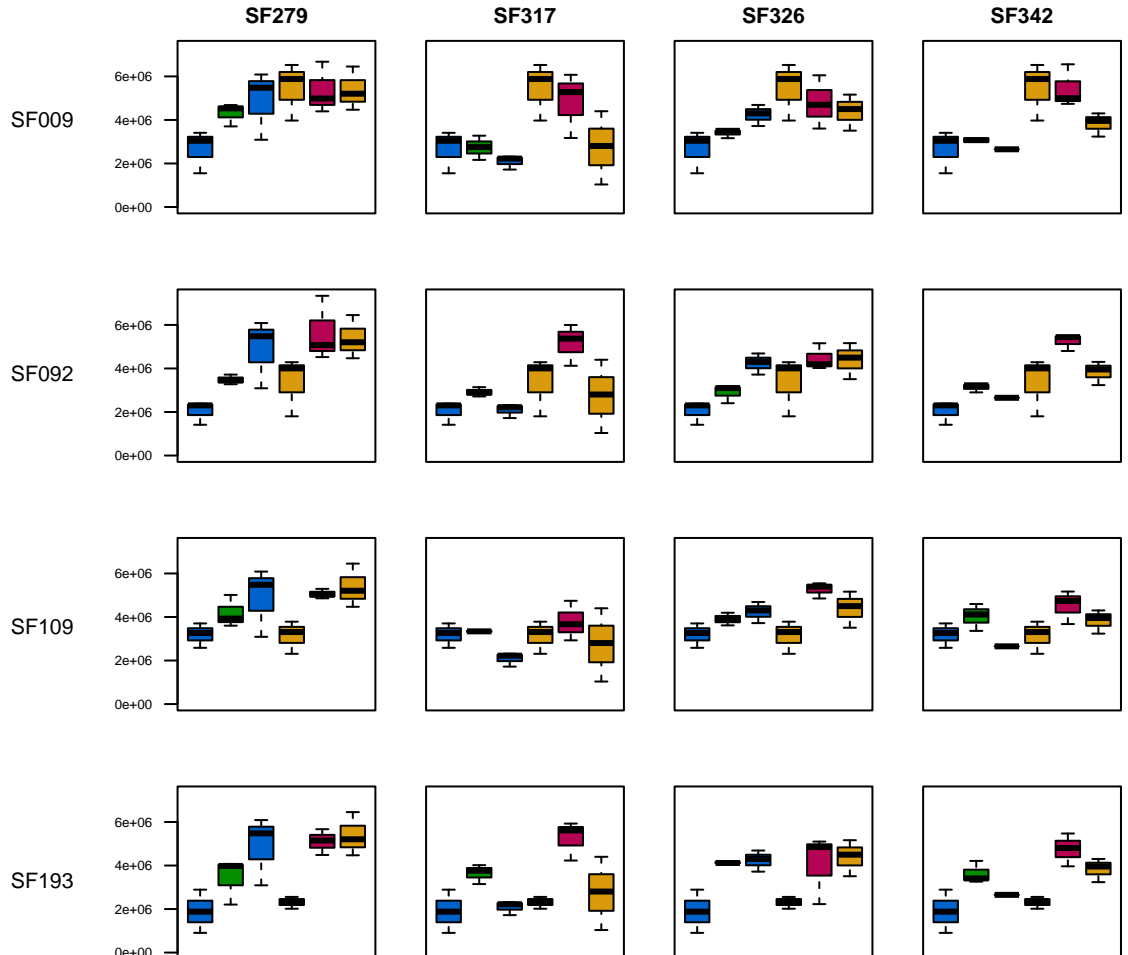



HanXRQChr02g0048961  
Probable ribosomal protein S5 family  
protein

Parents WW  
Parents WD  
Hybrids WW  
Hybrids WD

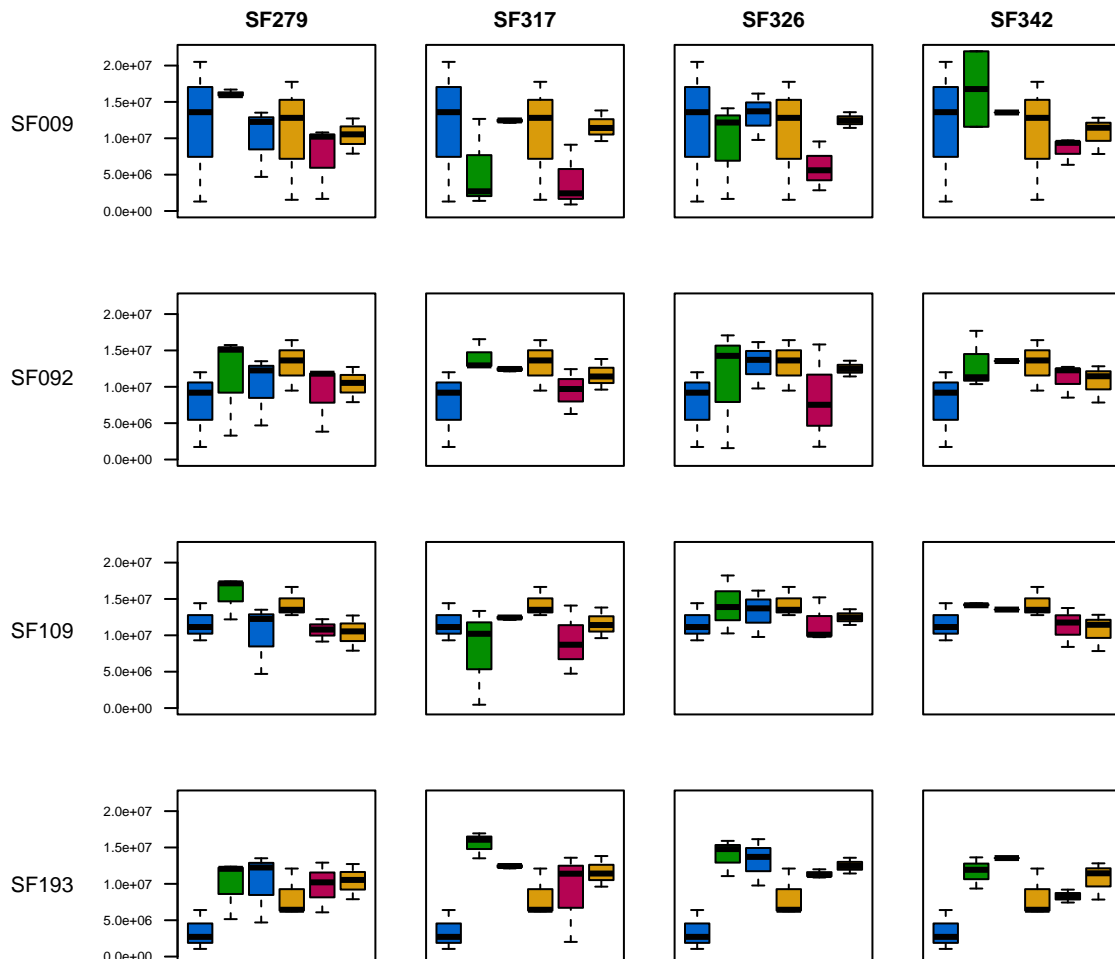

HanXRQChr13g0396471  
Probable thioredoxin reductase NTRC

Parents WW  
Parents WD  
Hybrids WW  
Hybrids WD

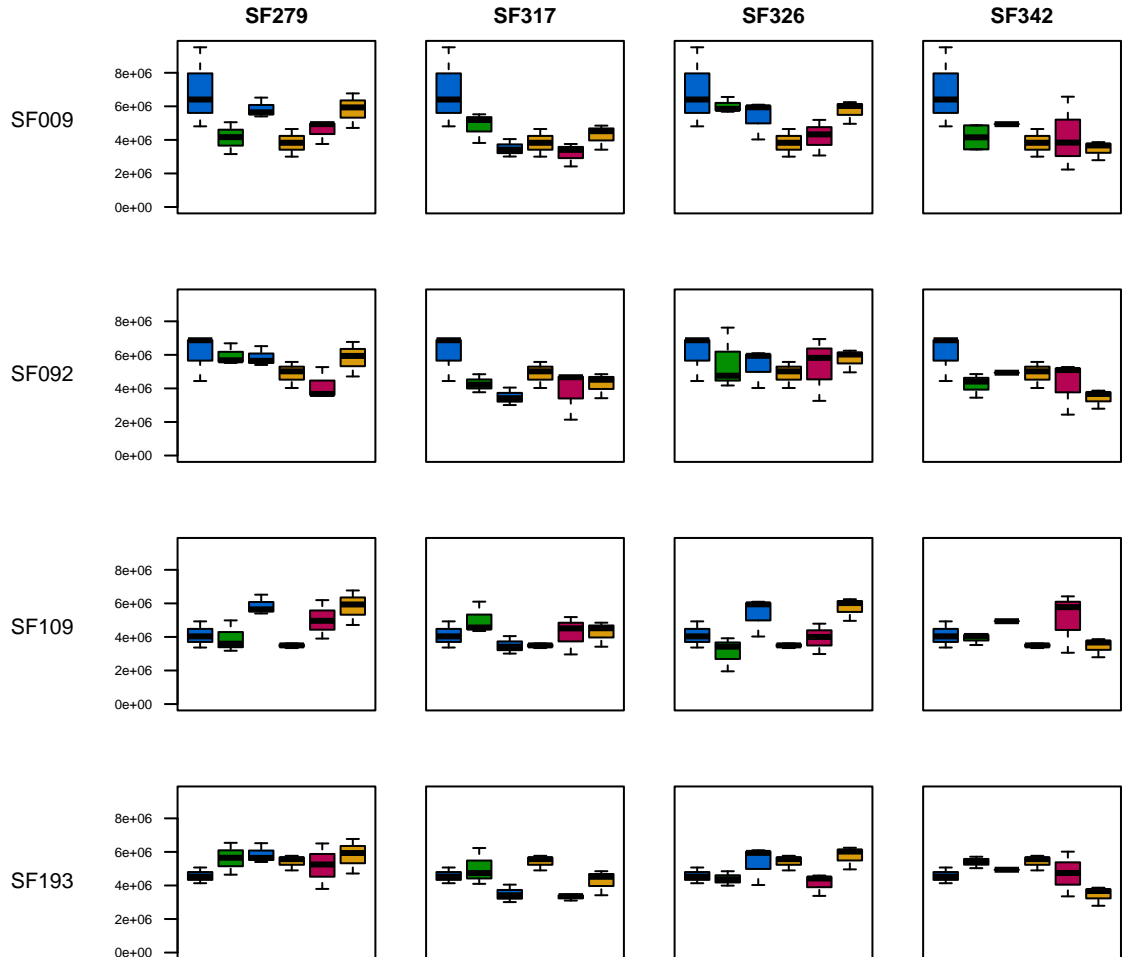

HanXRQChr06g0173891  
Probable UDP-sulfoquinovose synthase,  
chloroplastic

Parents WW  
Parents WD  
Hybrids WW  
Hybrids WD

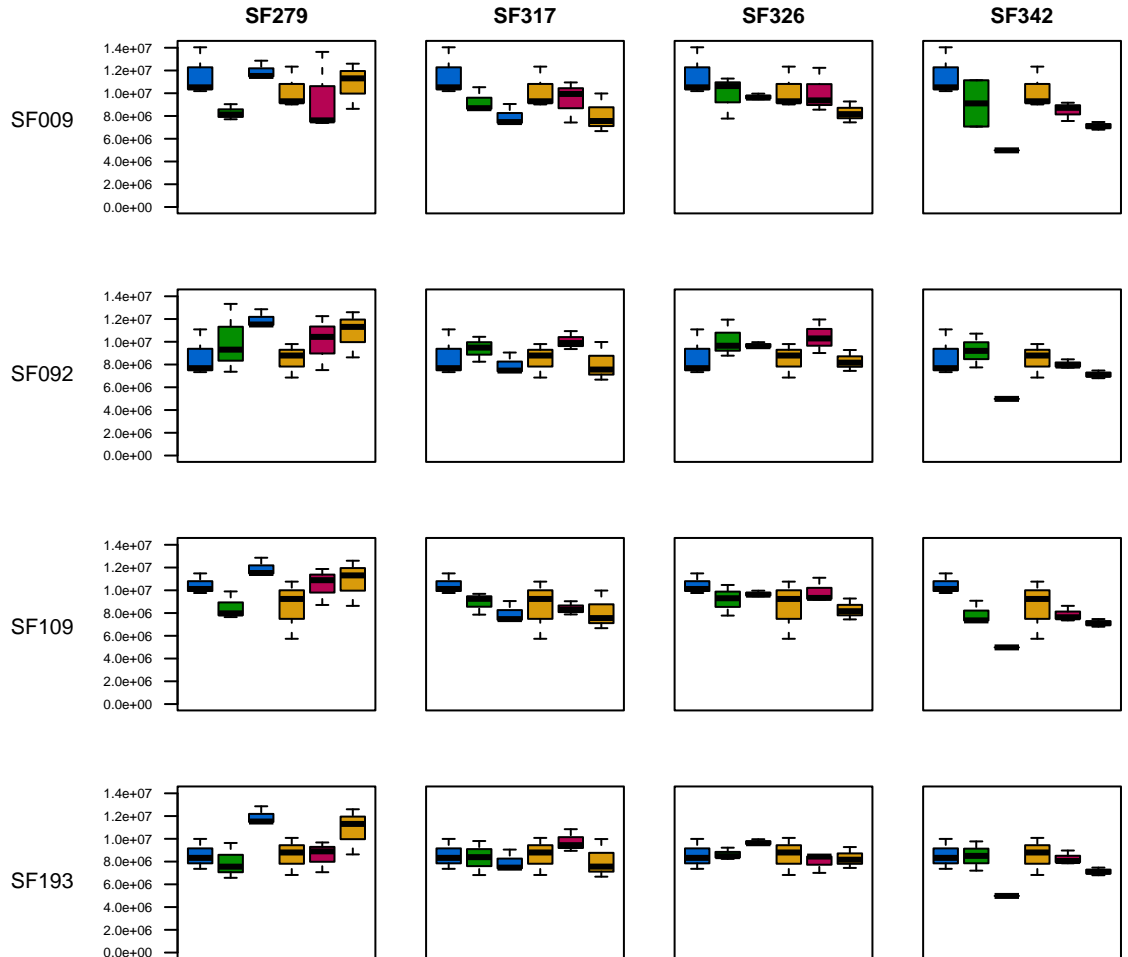

HanXRQChr15g0485821  
Probable aldo-keto reductase 2

Parents WW  
Parents WD  
Hybrids WW  
Hybrids WD

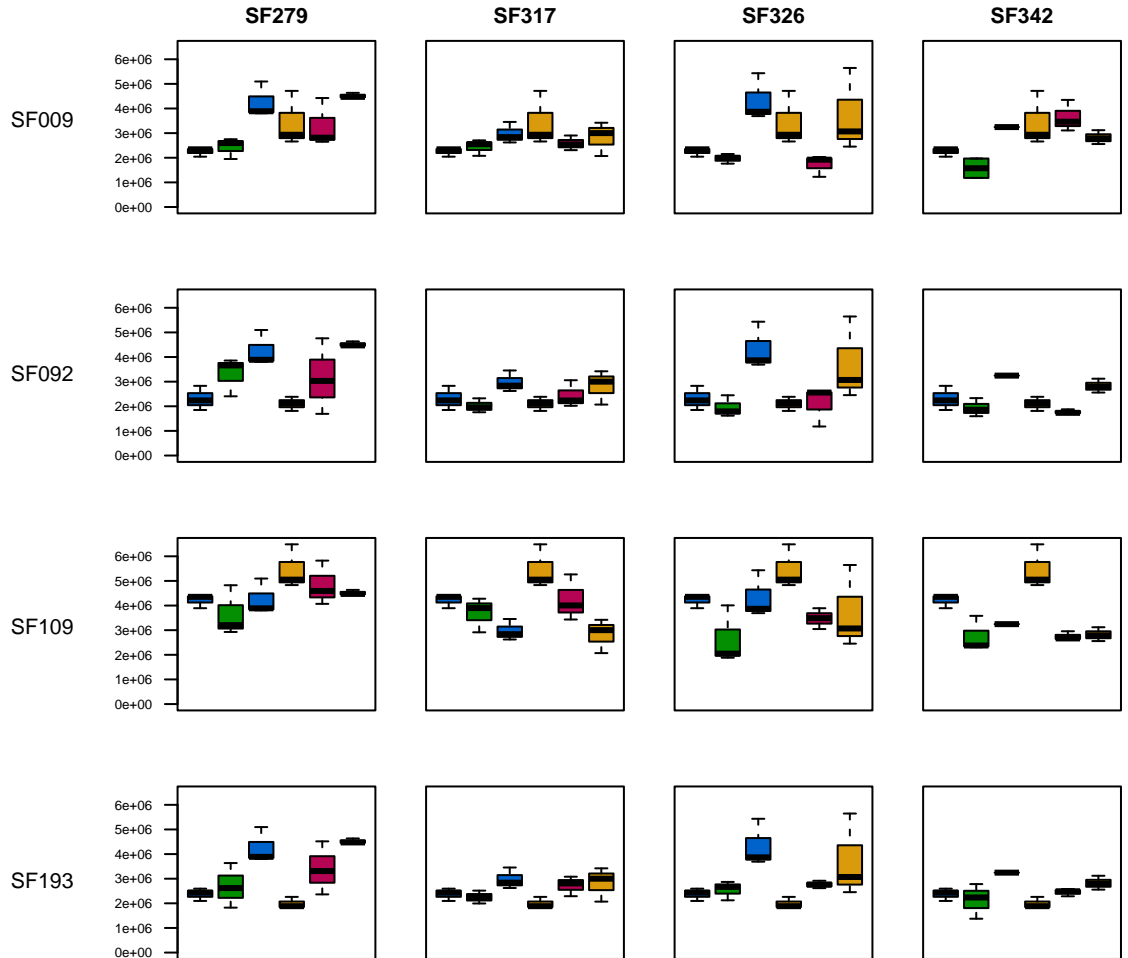

HanXRQChr16g0519941  
Putative ureohydrolase; Ureohydrolase  
domain

Parents WW  
Parents WD  
Hybrids WW  
Hybrids WD

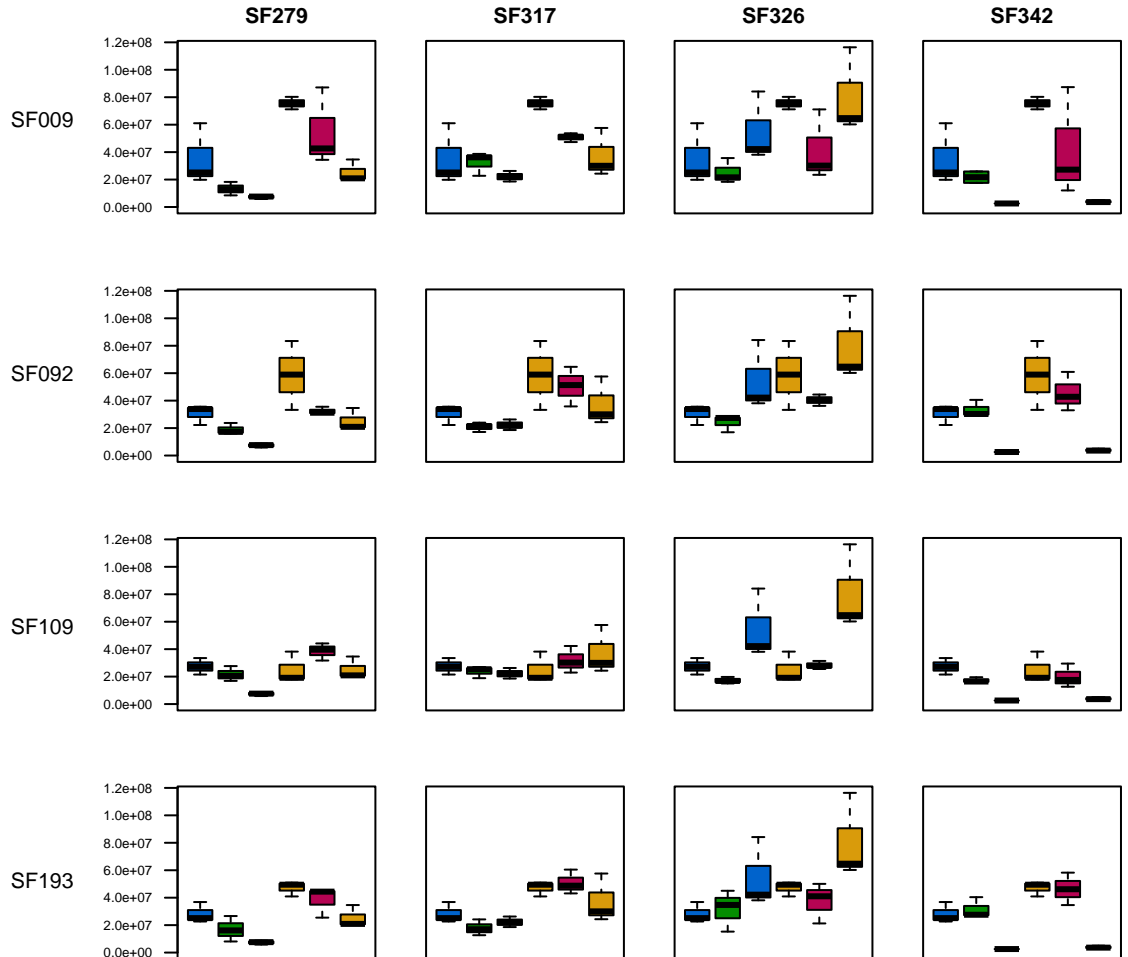

HanXRQChr05g0146641  
Probable chloroplastic drought-induced  
stress protein of 32 kD

Parents WW  
Parents WD  
Hybrids WW  
Hybrids WD

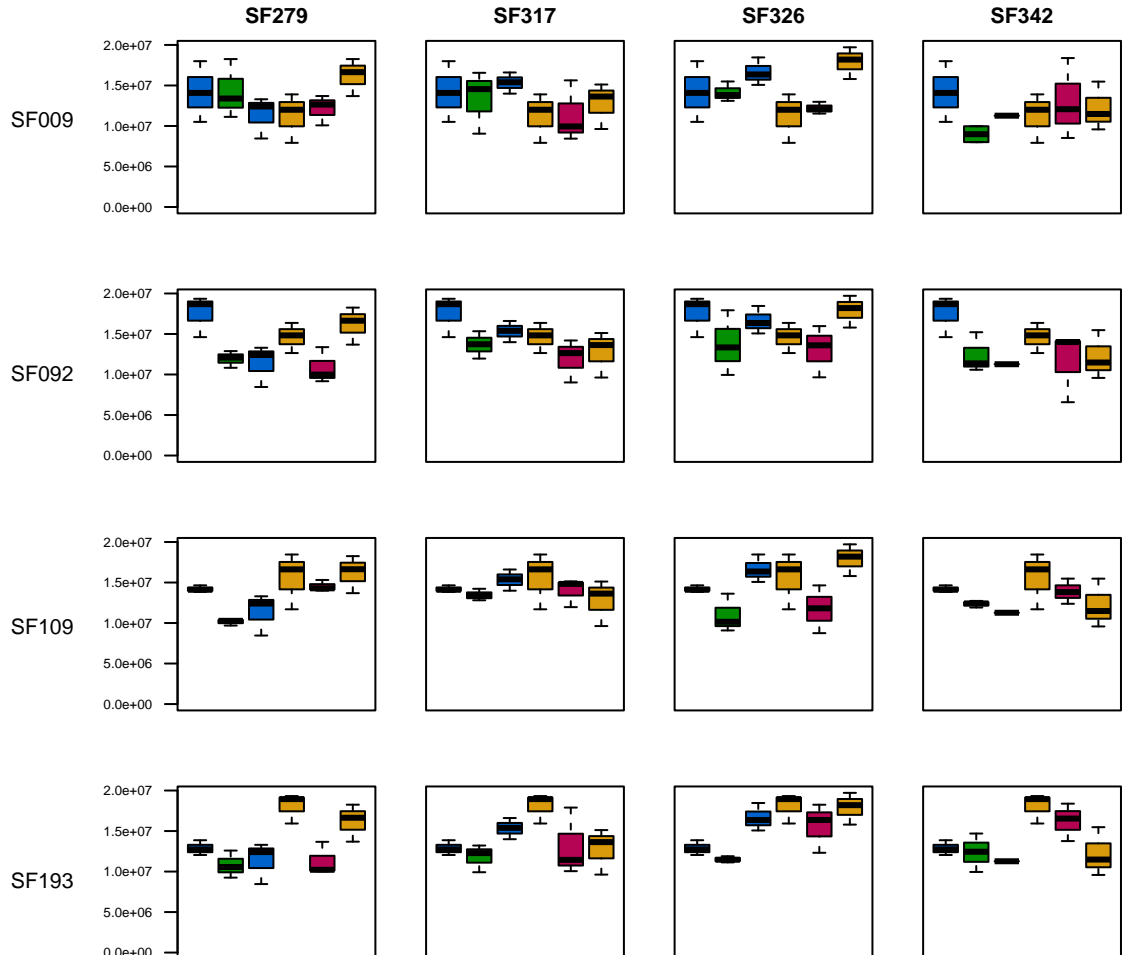

HanXRQChr16g0513741  
Putative cysteine synthase

- Parents WW
- Parents WD
- Hybrids WW
- Hybrids WD

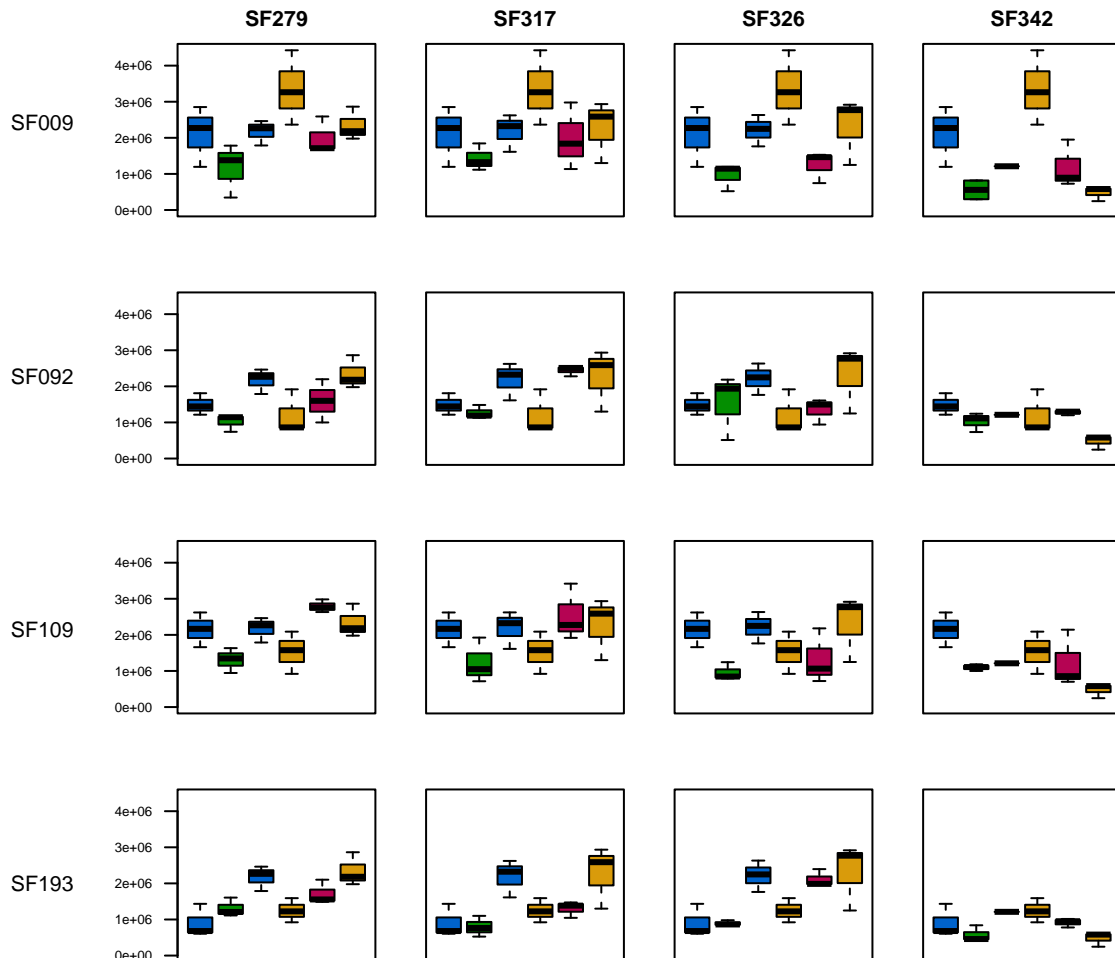

HanXRQChr08g0235911  
 Probable P-loop containing nucleoside  
 triphosphate hydrolases superfamily protein

Parents WW  
 Parents WD  
 Hybrids WW  
 Hybrids WD

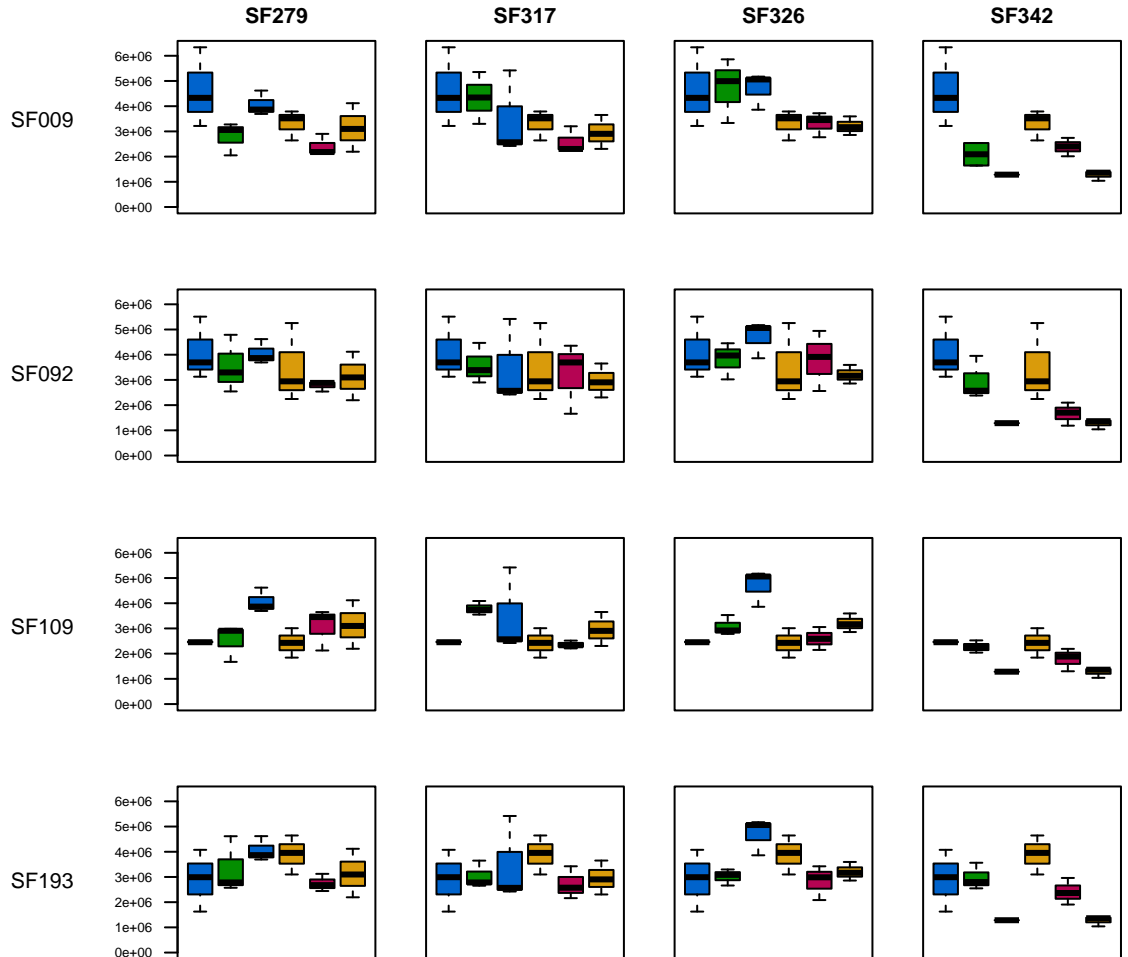



HanXRQChr08g0213821  
Probable alpha-xylosidase 1

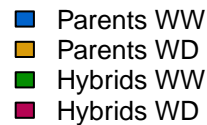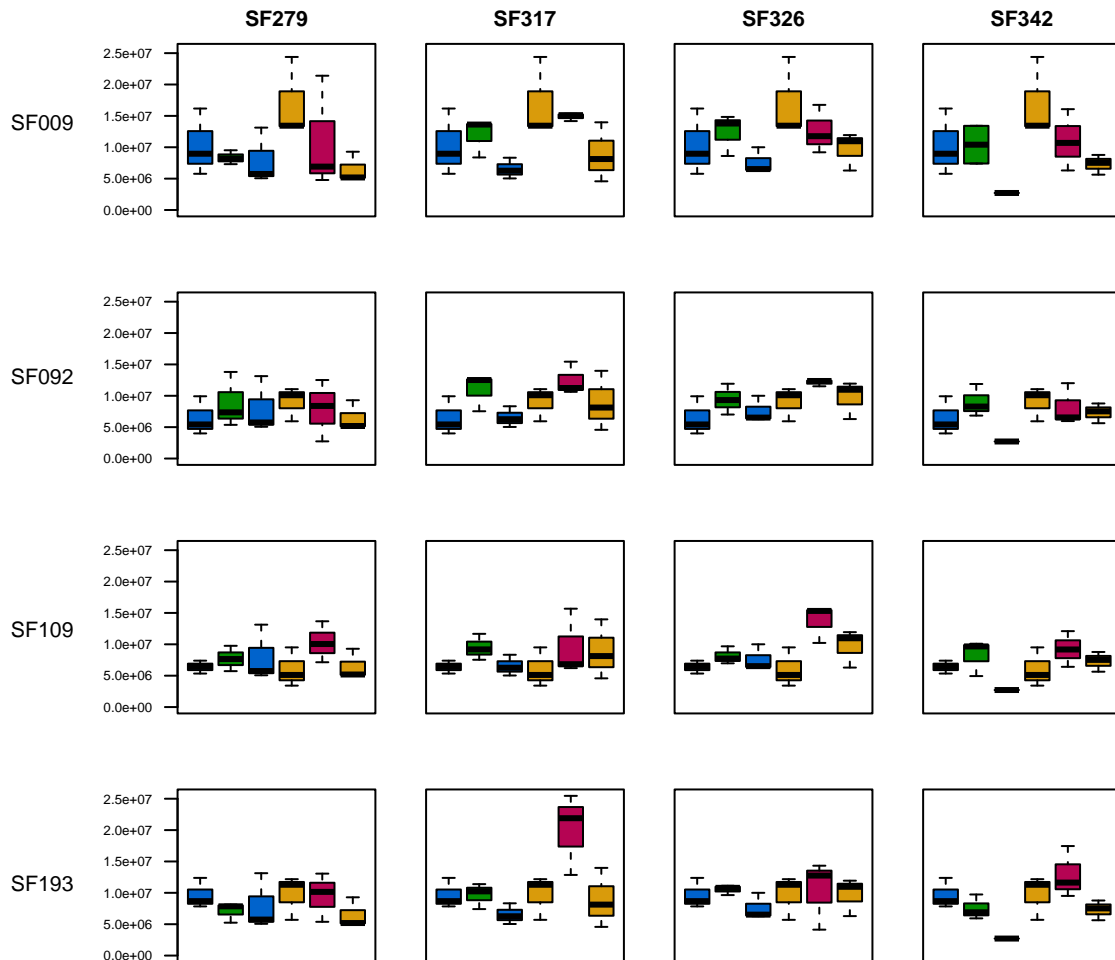

HanXRQChr07g0197831  
 Uncharacterized protein, conserved in  
 plant genome(s), supported by expression c

Parents WW  
 Parents WD  
 Hybrids WW  
 Hybrids WD

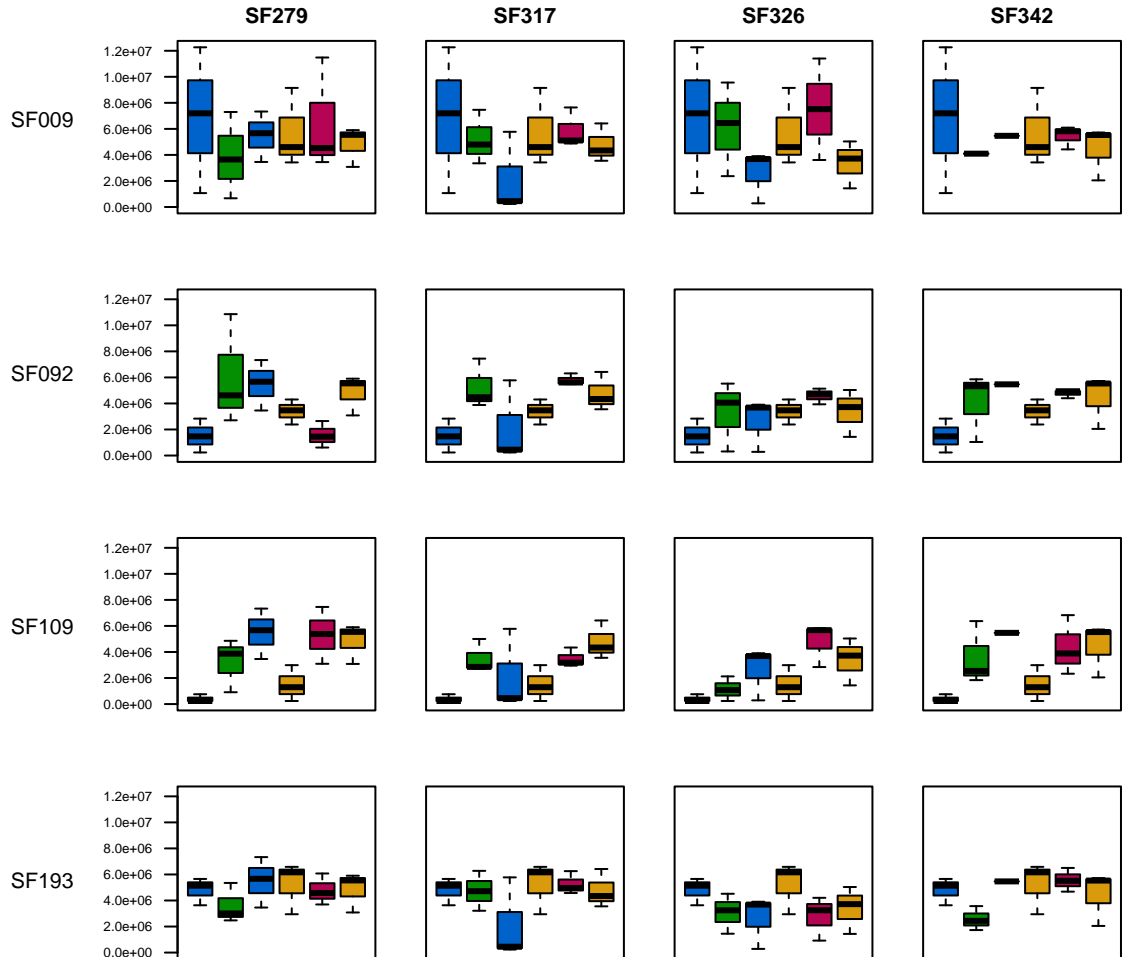

HanXRQChr15g0496871  
Probable chalcone--flavonone isomerase 2

Parents WW  
Parents WD  
Hybrids WW  
Hybrids WD

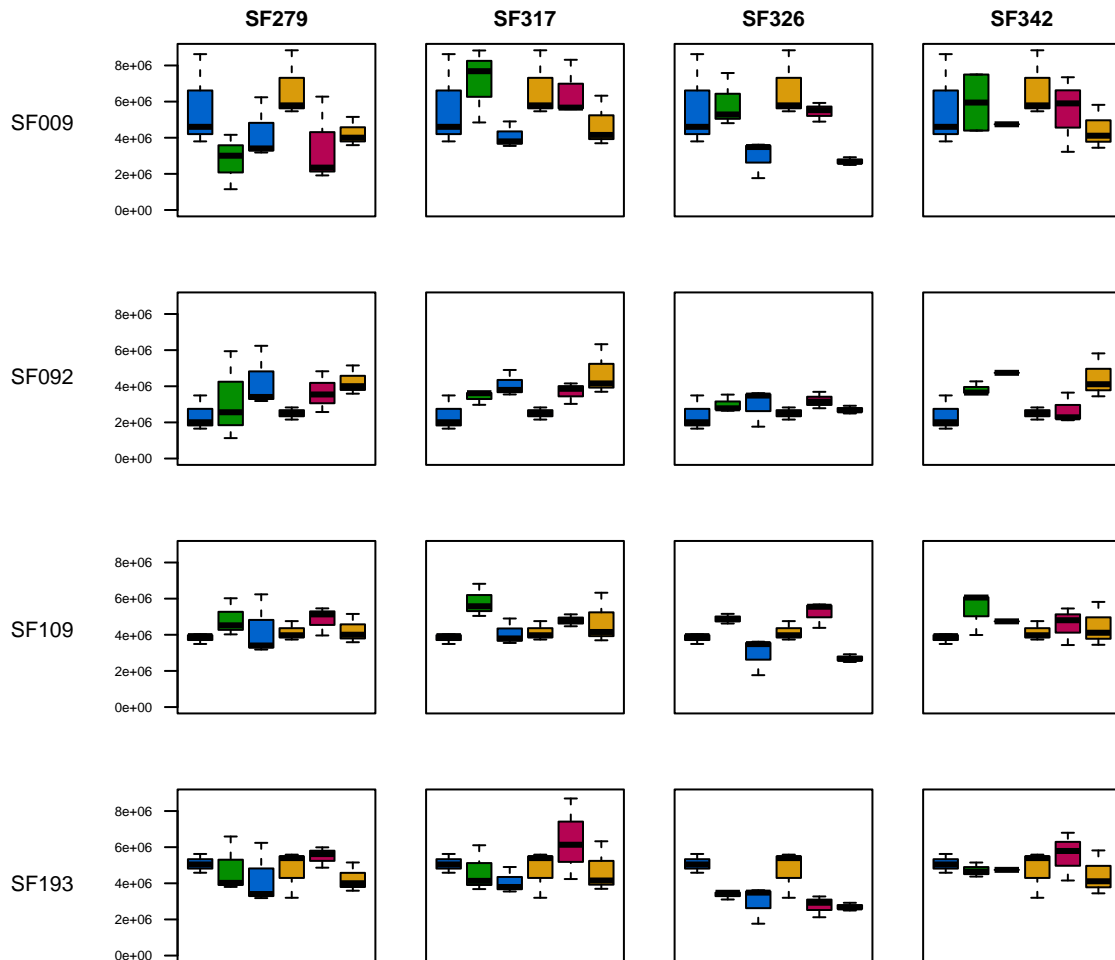

HanXRQChr14g0433441  
Probable chloroplastic NIFS-like  
cysteine desulfurase

Parents WW  
Parents WD  
Hybrids WW  
Hybrids WD

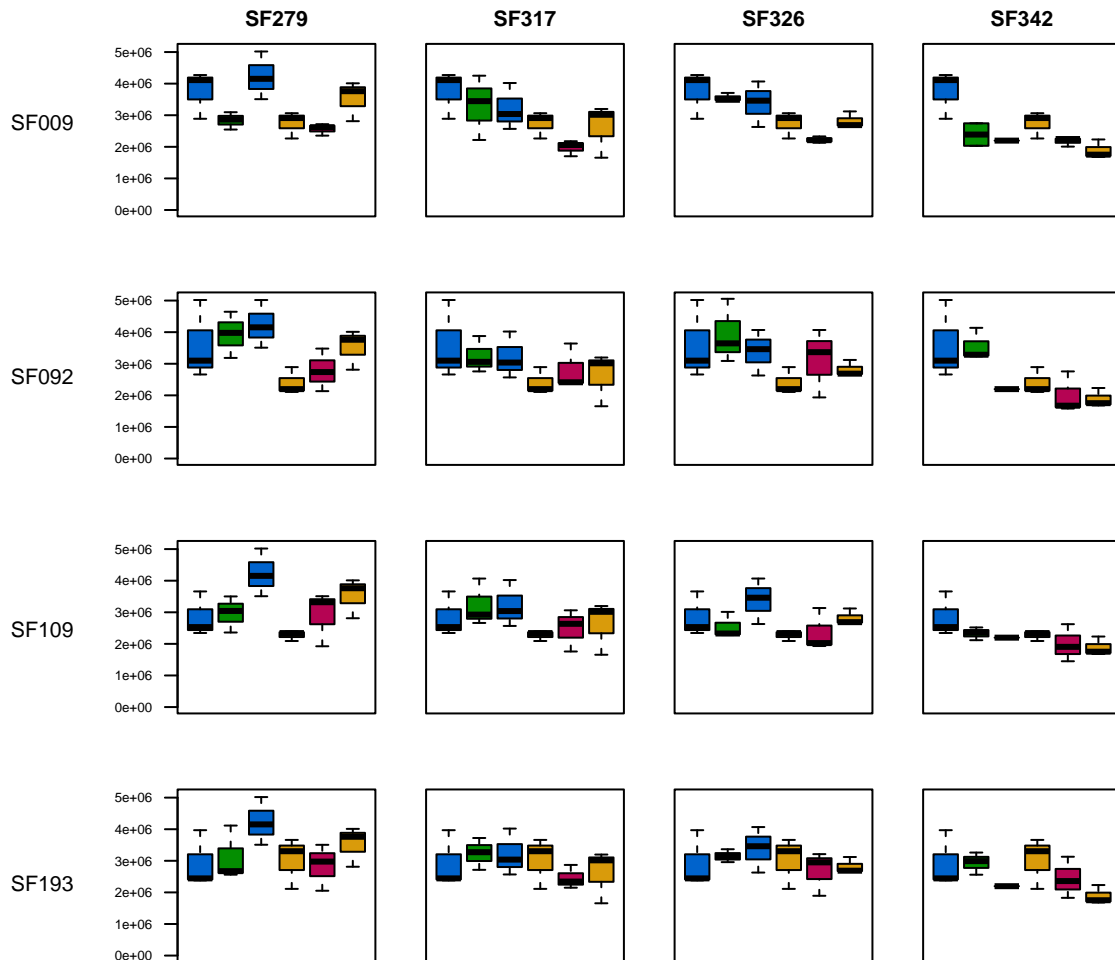

HanXRQChr11g0351201  
Probable family of unknown function  
(DUF662)

Parents WW  
Parents WD  
Hybrids WW  
Hybrids WD

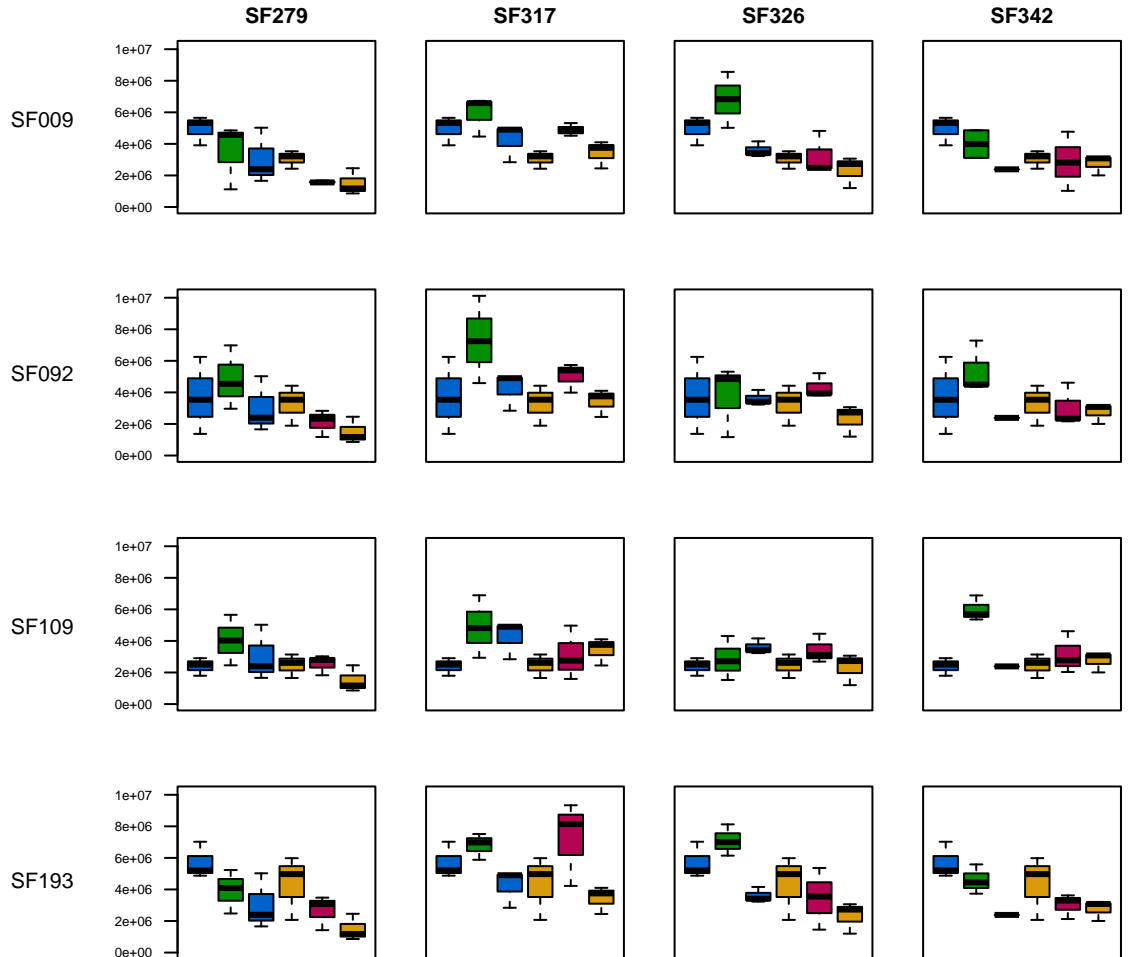

HanXRQChr01g0017991  
Putative bifunctional polymyxin  
resistance protein, ArnA

Parents WW  
Parents WD  
Hybrids WW  
Hybrids WD

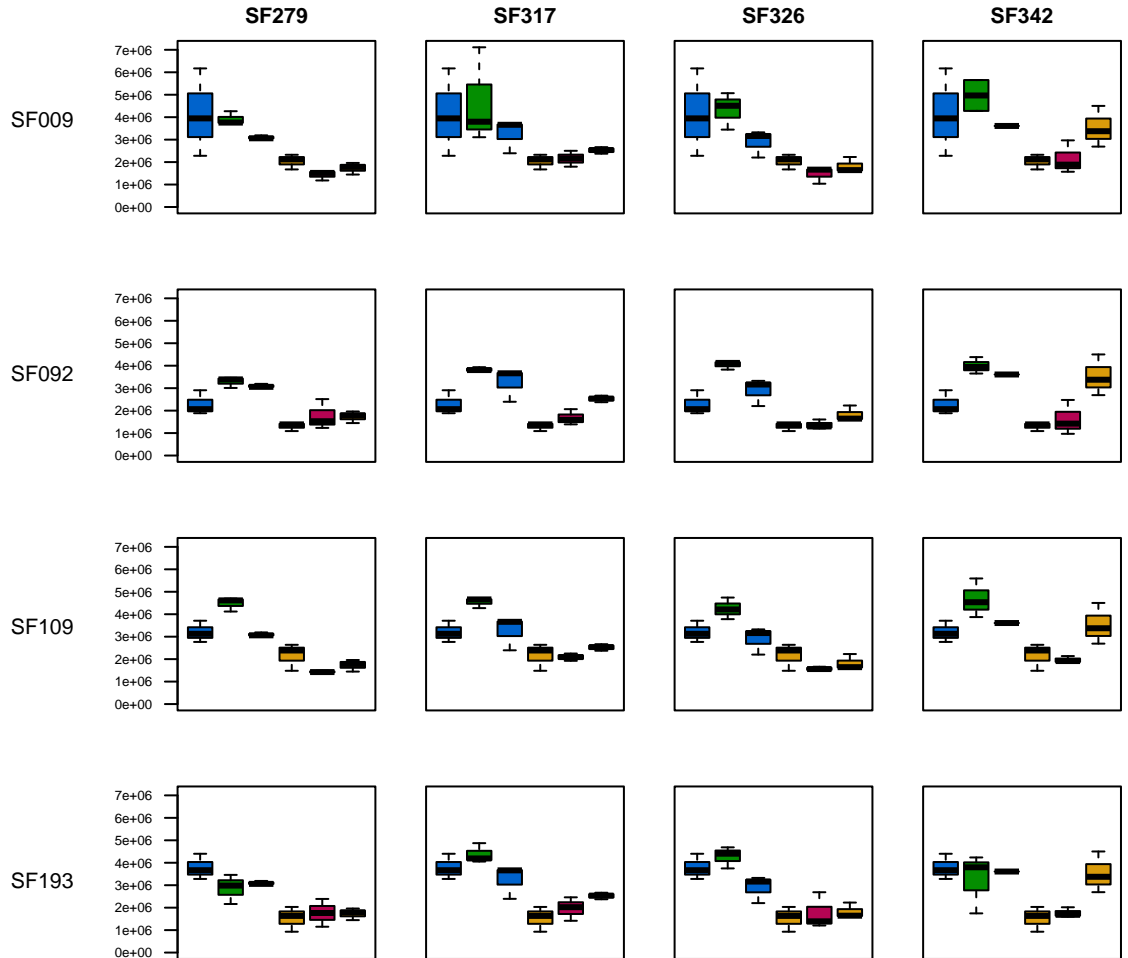

HanXRQChr04g0094541  
Probable proteasome subunit alpha type-6

Parents WW  
Parents WD  
Hybrids WW  
Hybrids WD

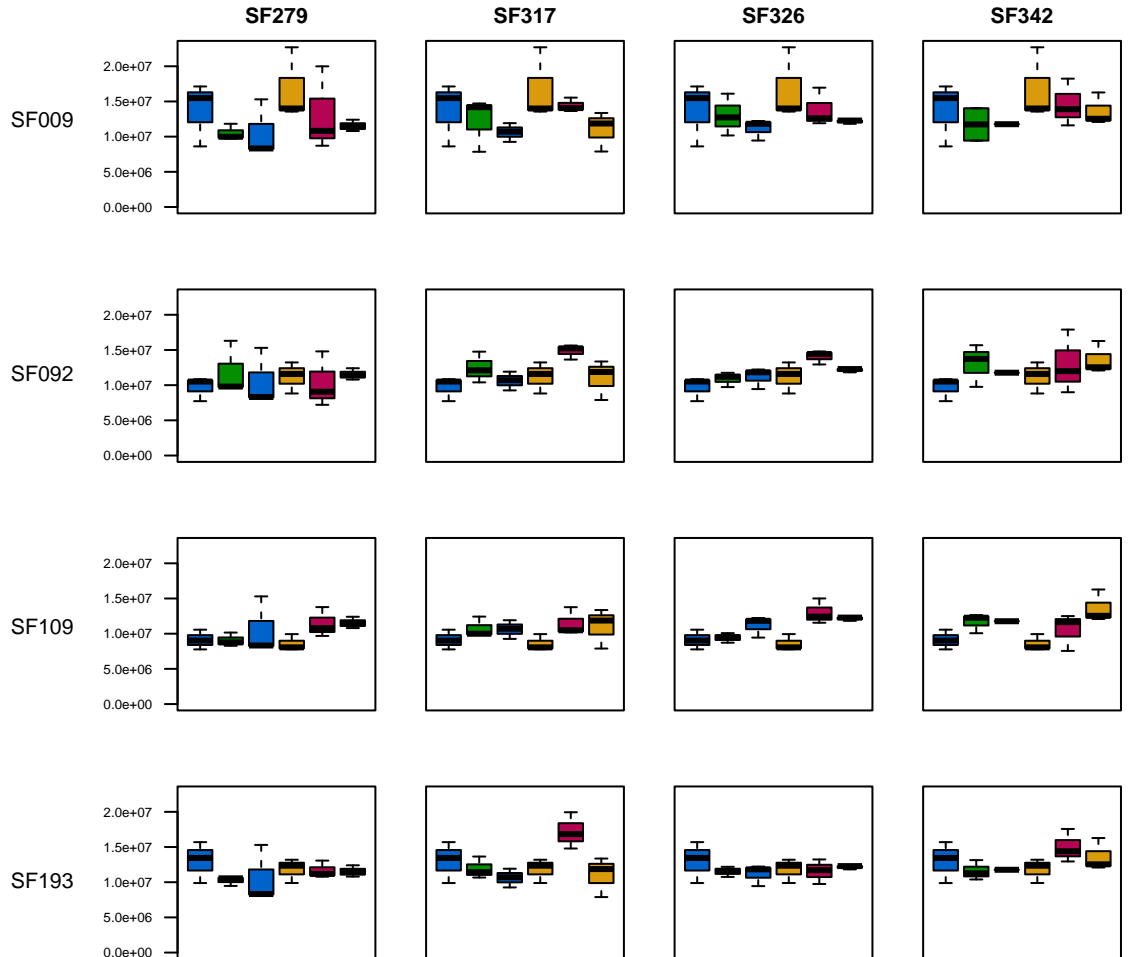

HanXRQChr08g0210761  
Probable psbQ-like 2

Parents WW  
Parents WD  
Hybrids WW  
Hybrids WD

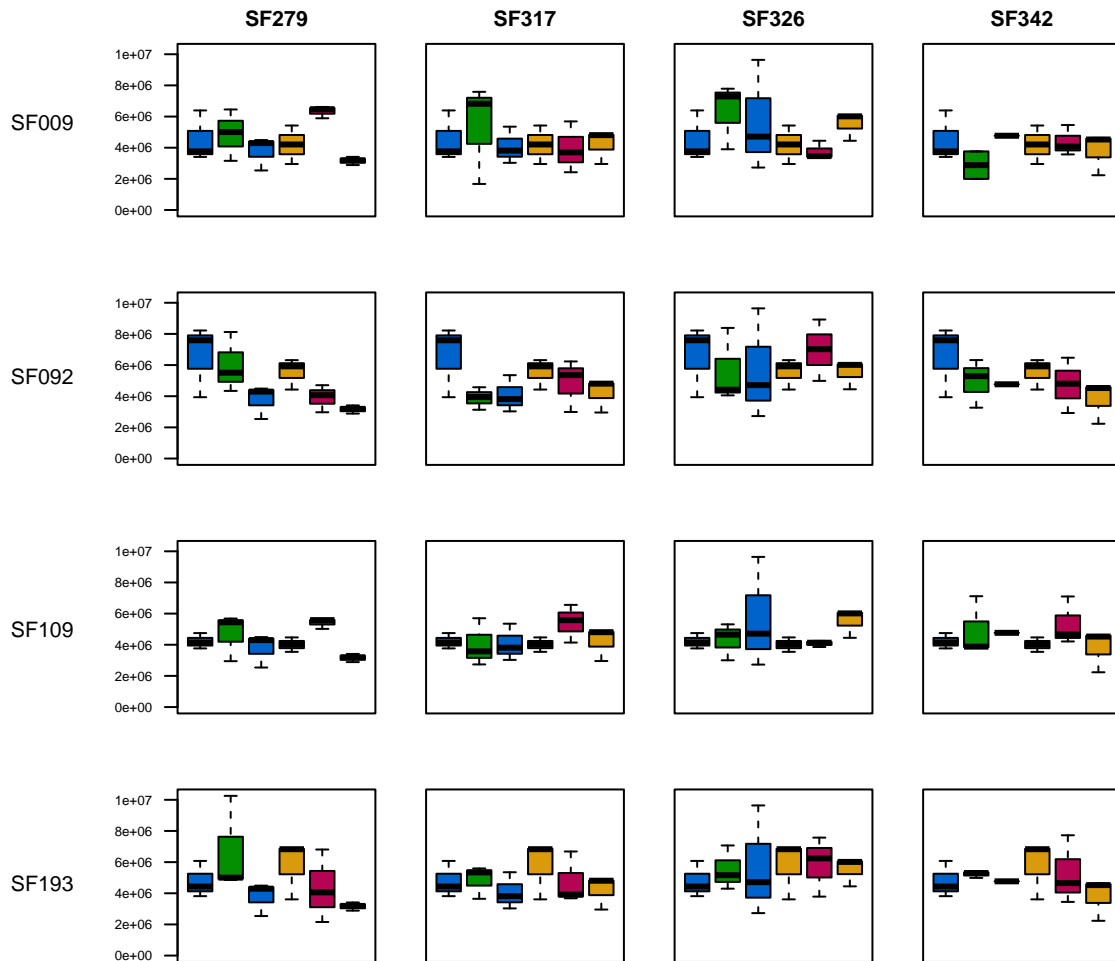



HanXRQChr13g0424561  
 Probable 3-dehydroquinase synthase,  
 chloroplastic

Parents WW  
 Parents WD  
 Hybrids WW  
 Hybrids WD

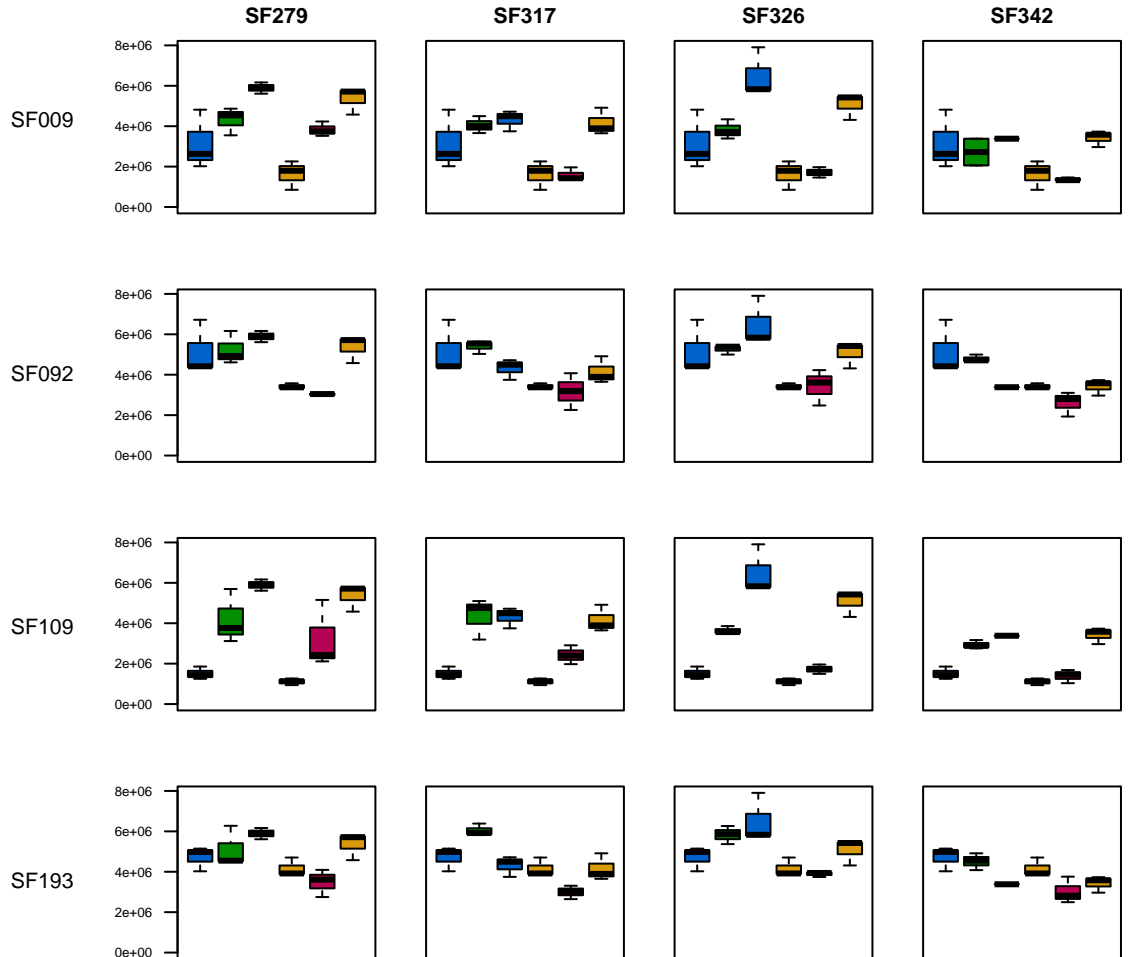

HanXRQChr05g0146131  
Probable mevalonate/galactokinase  
family protein

Parents WW  
Parents WD  
Hybrids WW  
Hybrids WD

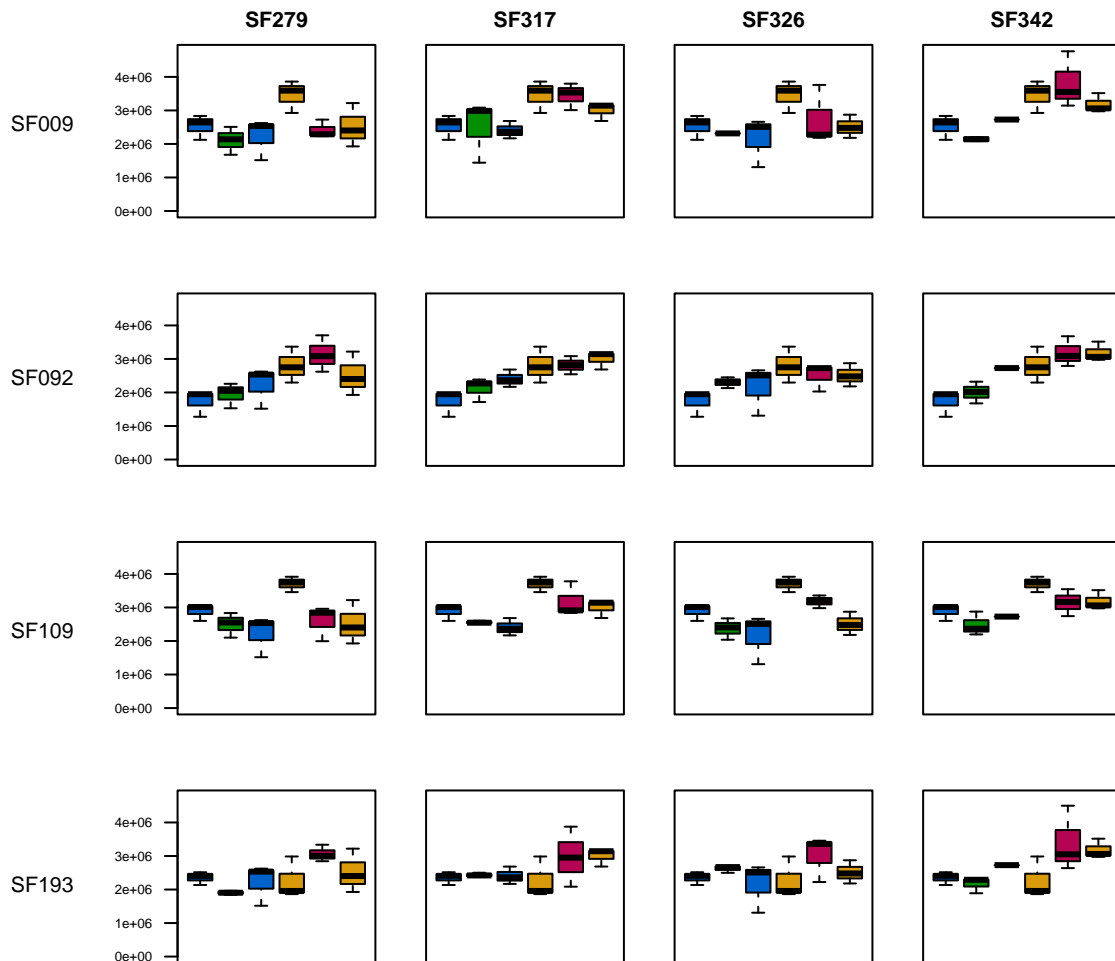

HanXRQChr15g0475131  
Probable prohibitin 3

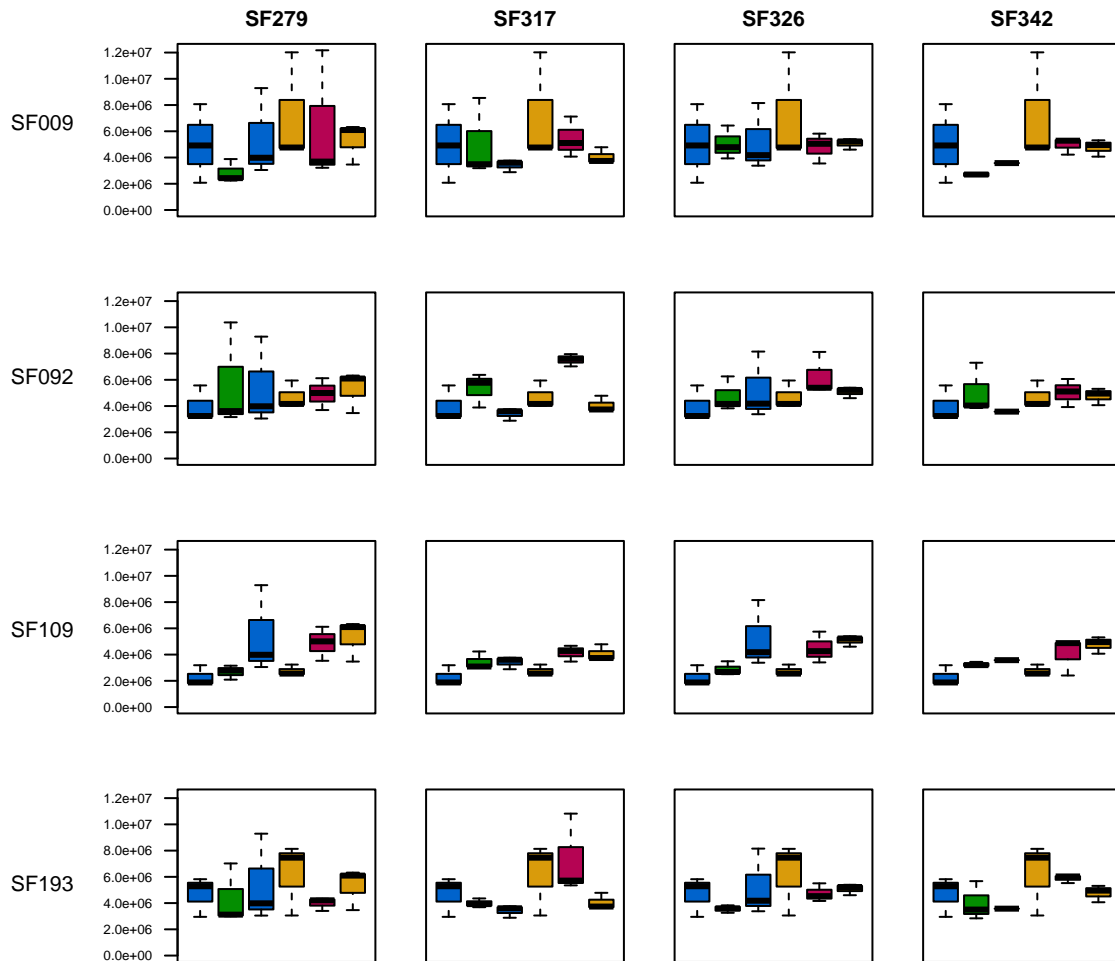

HanXRQChr12g0372271  
Probable glyceraldehyde-3-phosphate  
dehydrogenase, cytosolic

Parents WW  
Parents WD  
Hybrids WW  
Hybrids WD

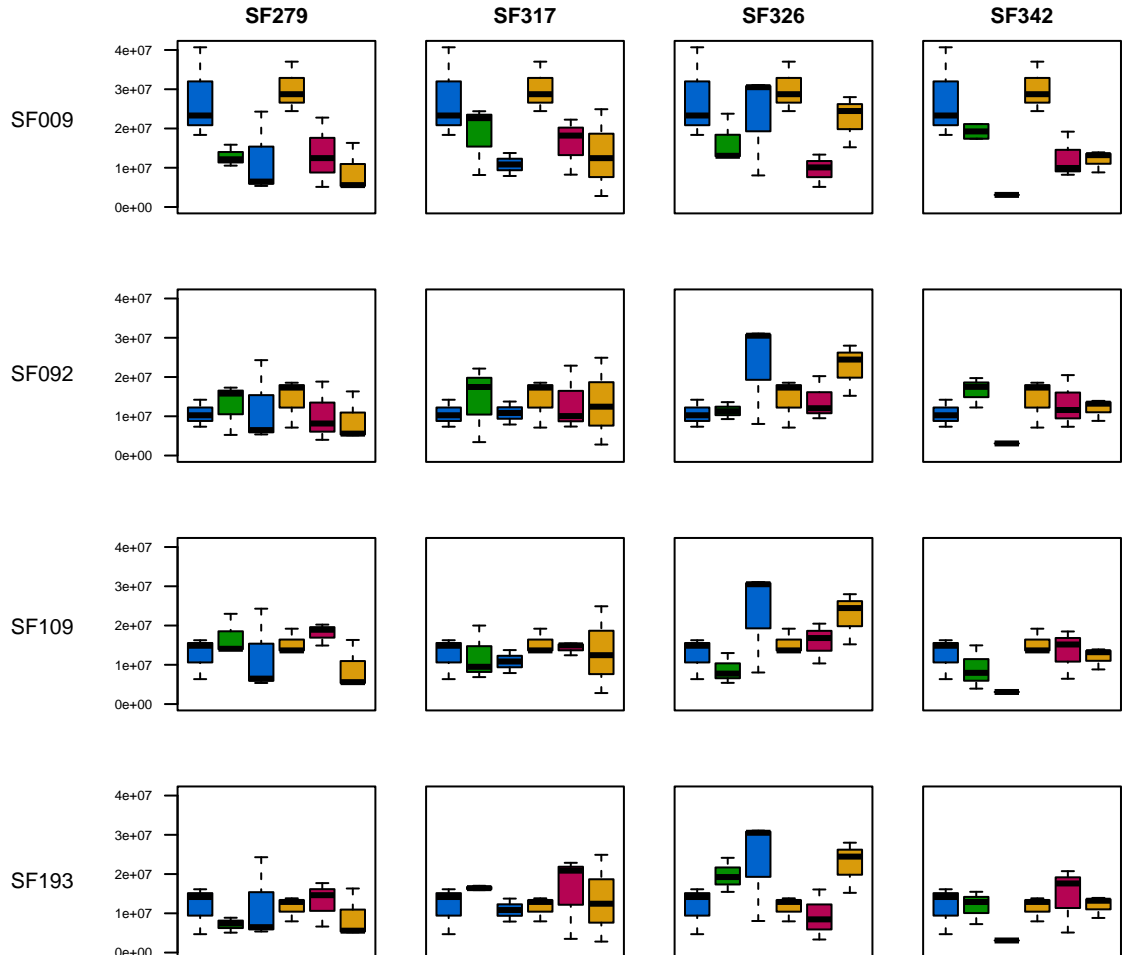

HanXRQChr10g0309971  
Uncharacterized conserved protein

- Parents WW
- Parents WD
- Hybrids WW
- Hybrids WD

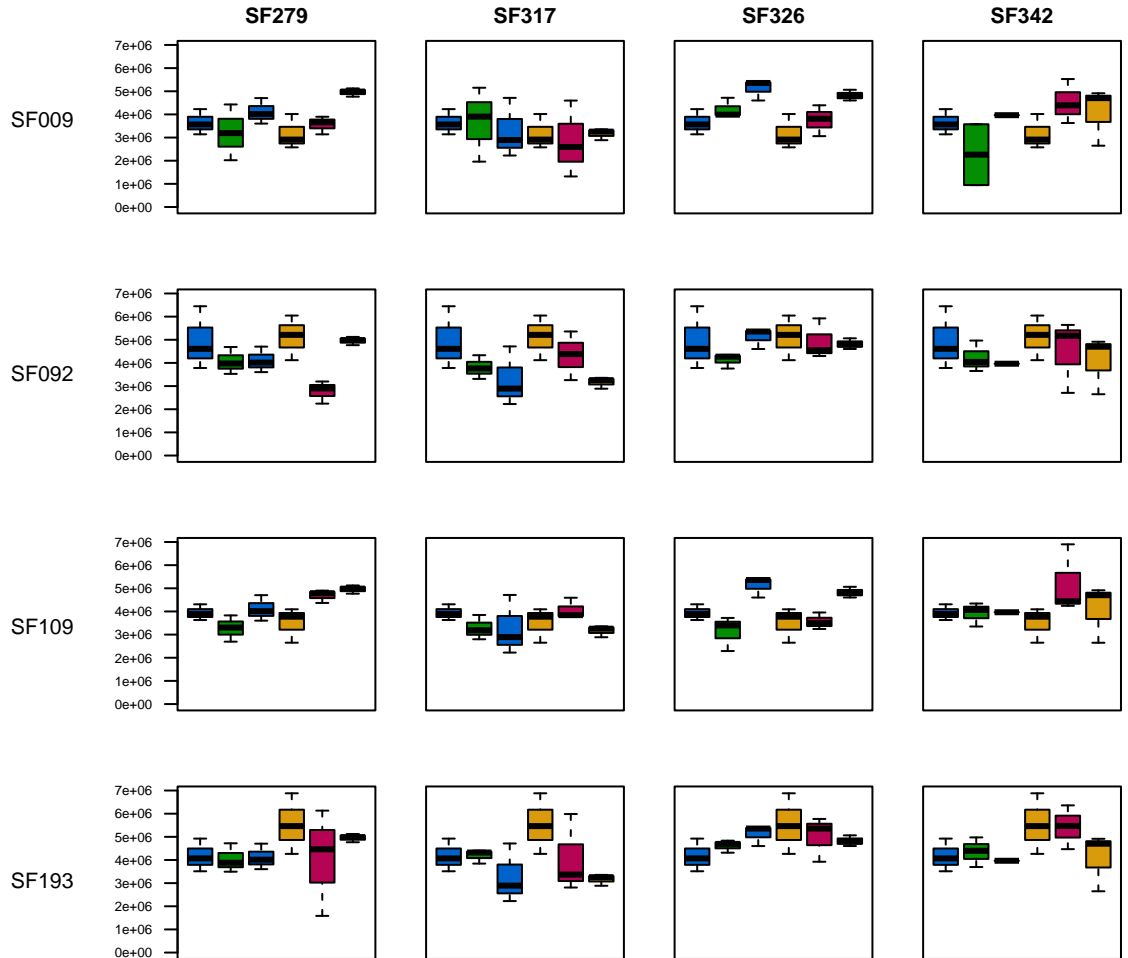

HanXRQChr02g0049421  
 Probable NAD(P)-binding Rossmann-fold  
 superfamily protein

Parents WW  
 Parents WD  
 Hybrids WW  
 Hybrids WD

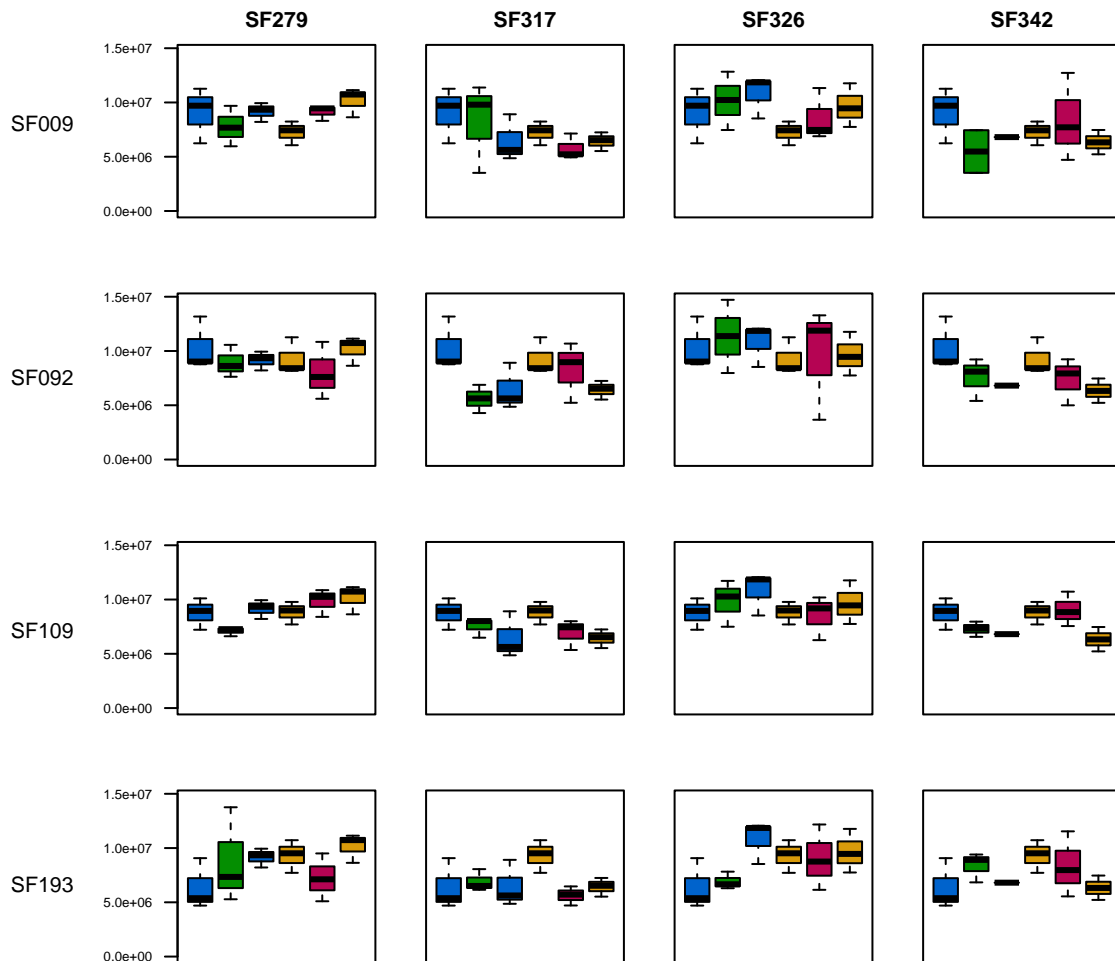

HanXRQChr09g0277271  
 Probable pectinesterase/pectinesterase  
 inhibitor U1

Parents WW  
 Parents WD  
 Hybrids WW  
 Hybrids WD

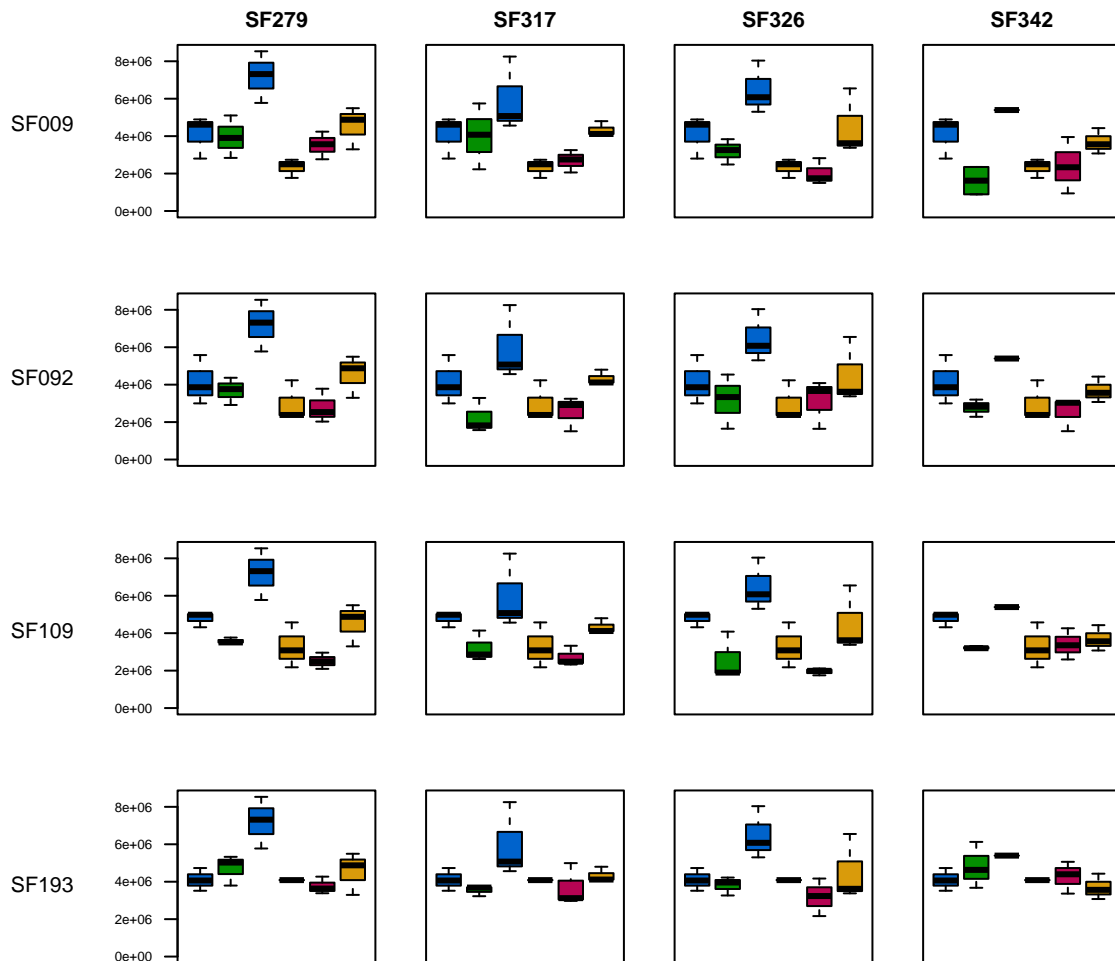

HanXRQChr07g0188901  
Probable 8-hydroxygeraniol dehydrogenase

Parents WW  
Parents WD  
Hybrids WW  
Hybrids WD

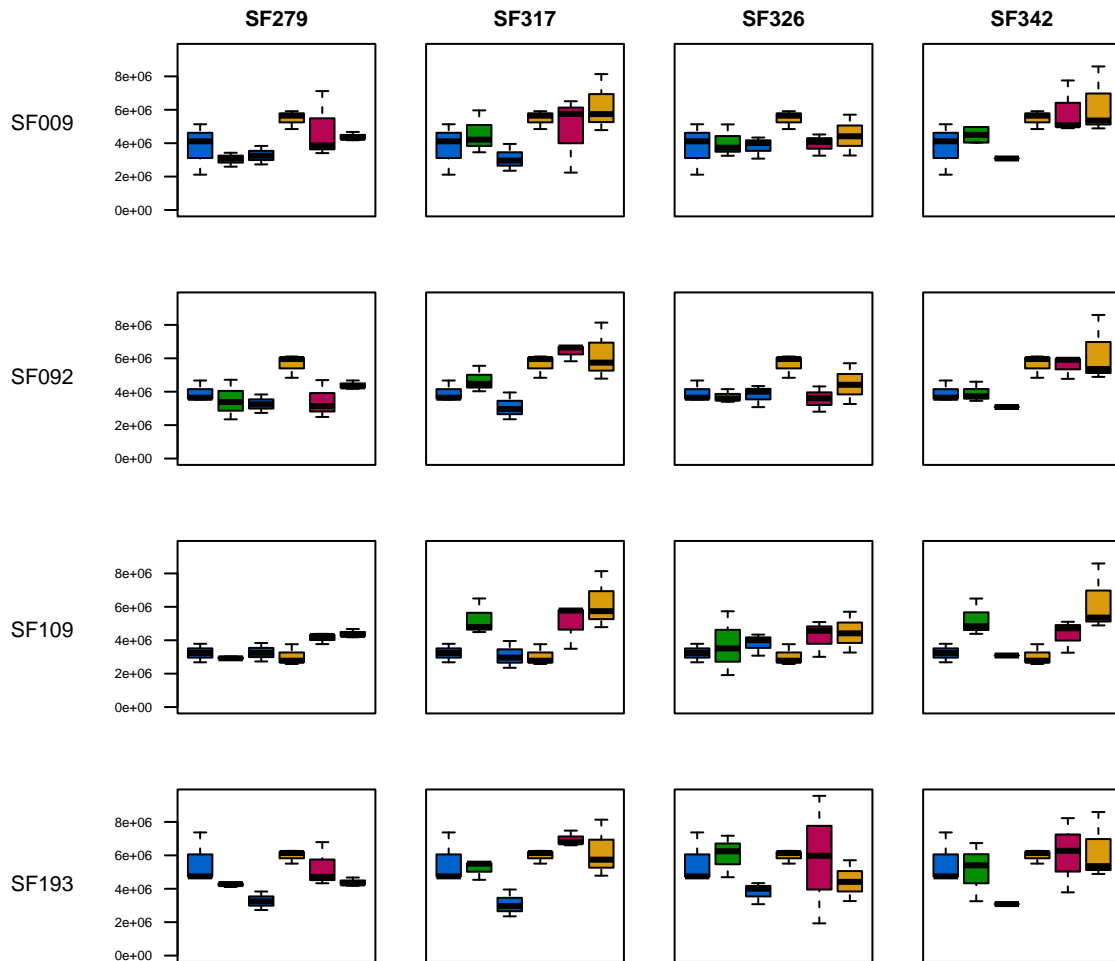



HanXRQChr12g0373081  
 Probable voltage dependent anion  
 channel 2

Parents WW  
 Parents WD  
 Hybrids WW  
 Hybrids WD

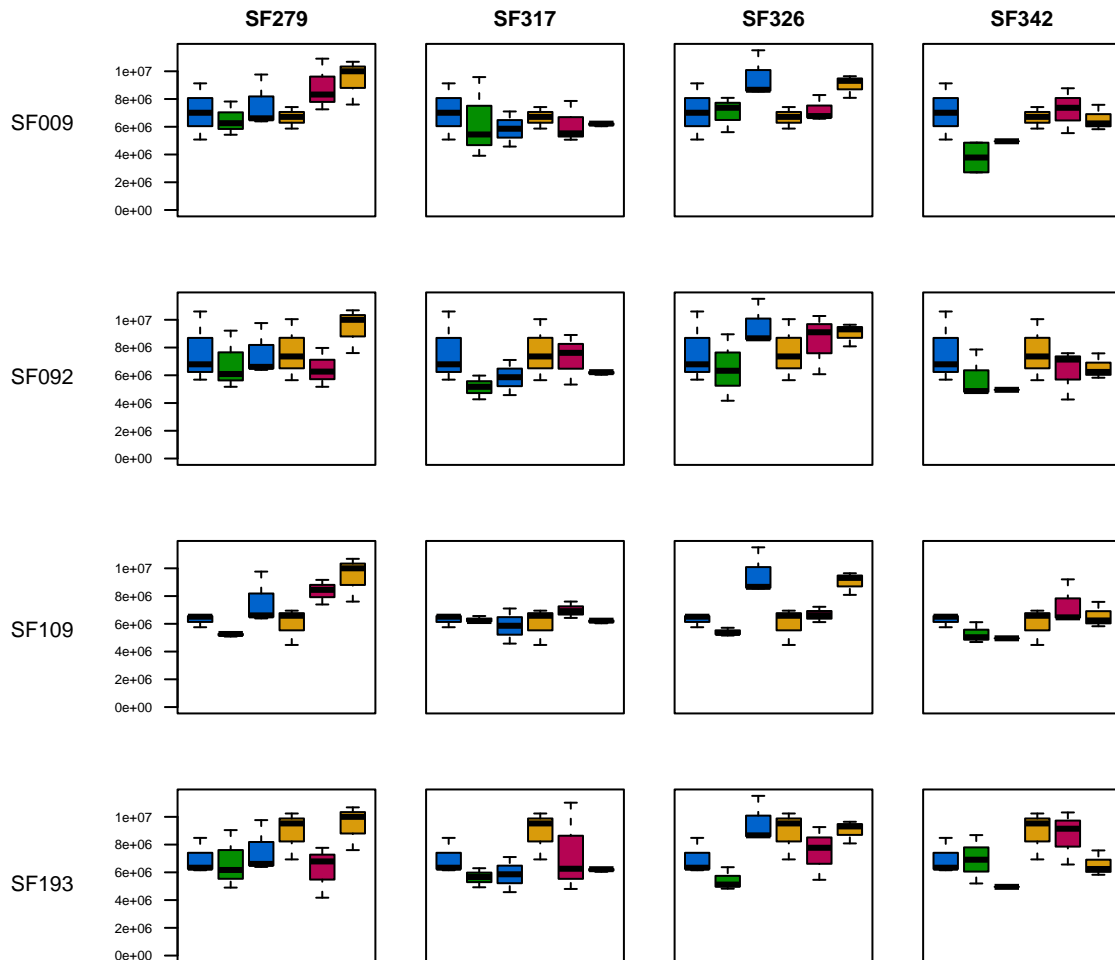

HanXRQChr09g0275121  
Probable ABC transporter G family  
member 37

Parents WW  
Parents WD  
Hybrids WW  
Hybrids WD

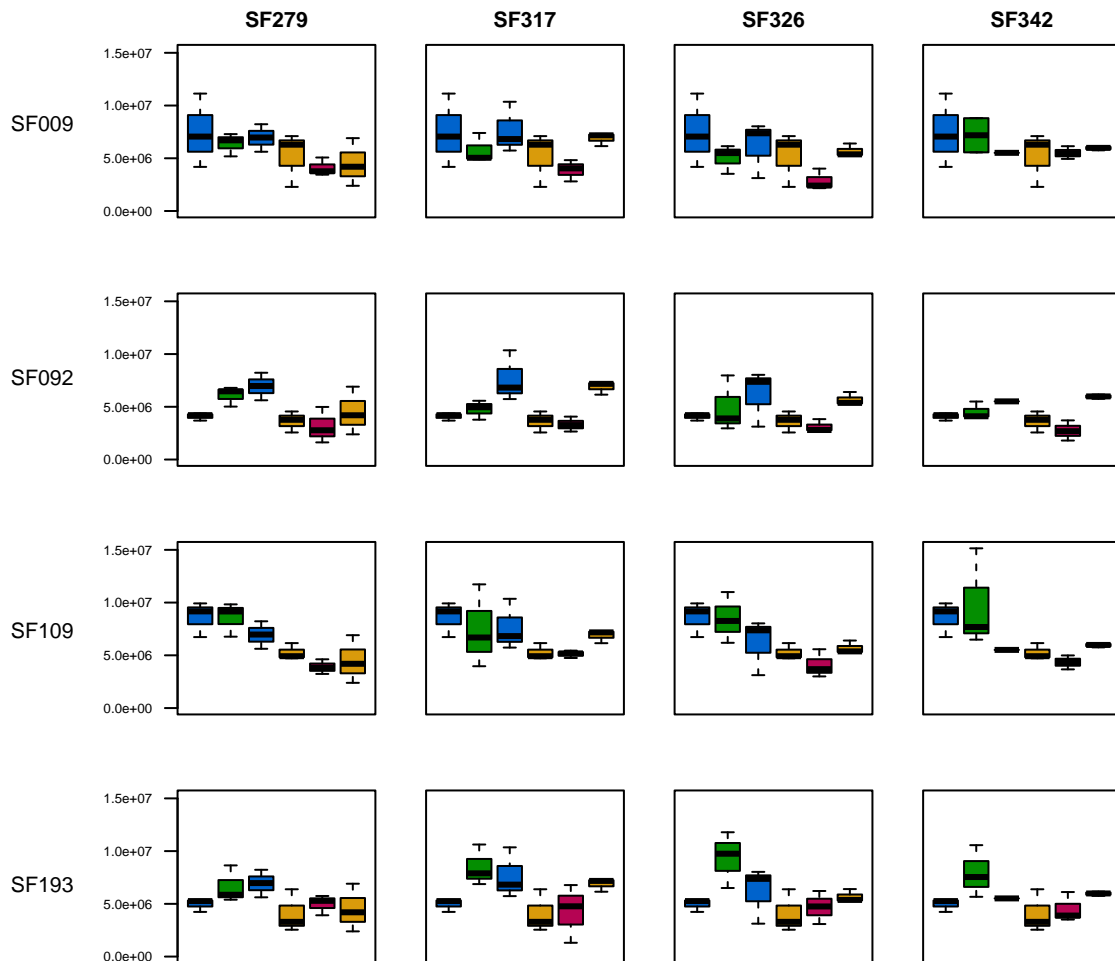

HanXRQChr11g0340011  
 Probable regulatory particle triple-A  
 ATPase 5A

Parents WW  
 Parents WD  
 Hybrids WW  
 Hybrids WD

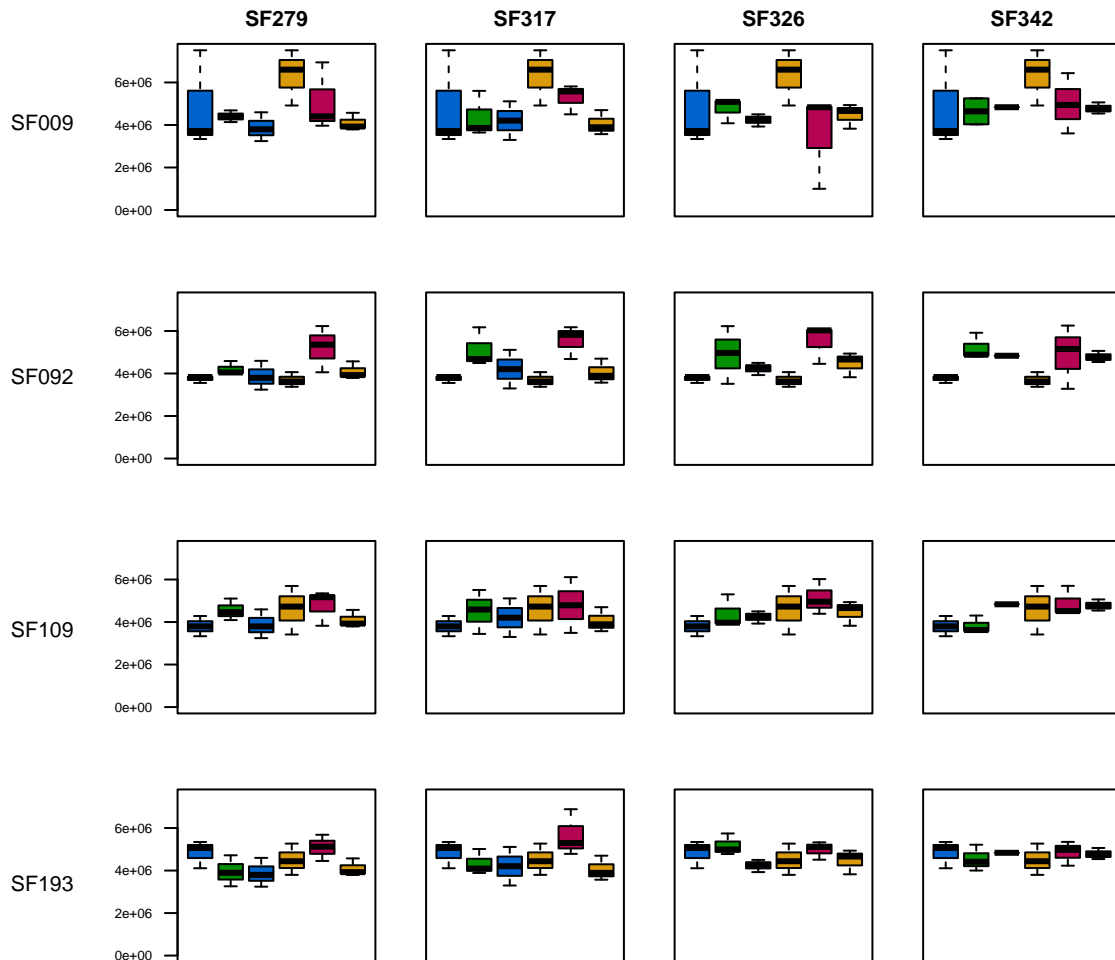

HanXRQChr05g0146621  
Probable plastocyanin, chloroplastic

Parents WW  
Parents WD  
Hybrids WW  
Hybrids WD

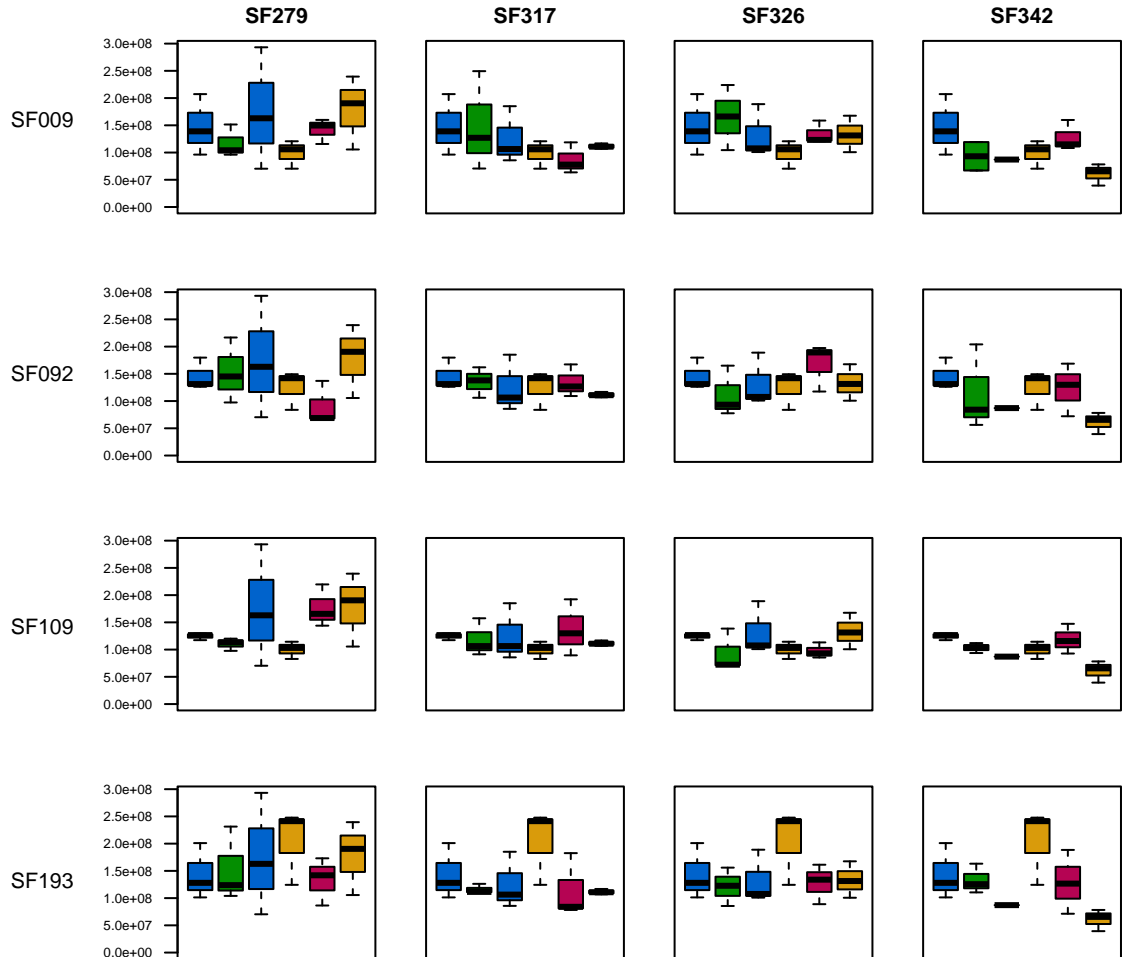

HanXRQChr09g0276451  
Probable transducin family protein /  
WD-40 repeat family protein

Parents WW  
Parents WD  
Hybrids WW  
Hybrids WD

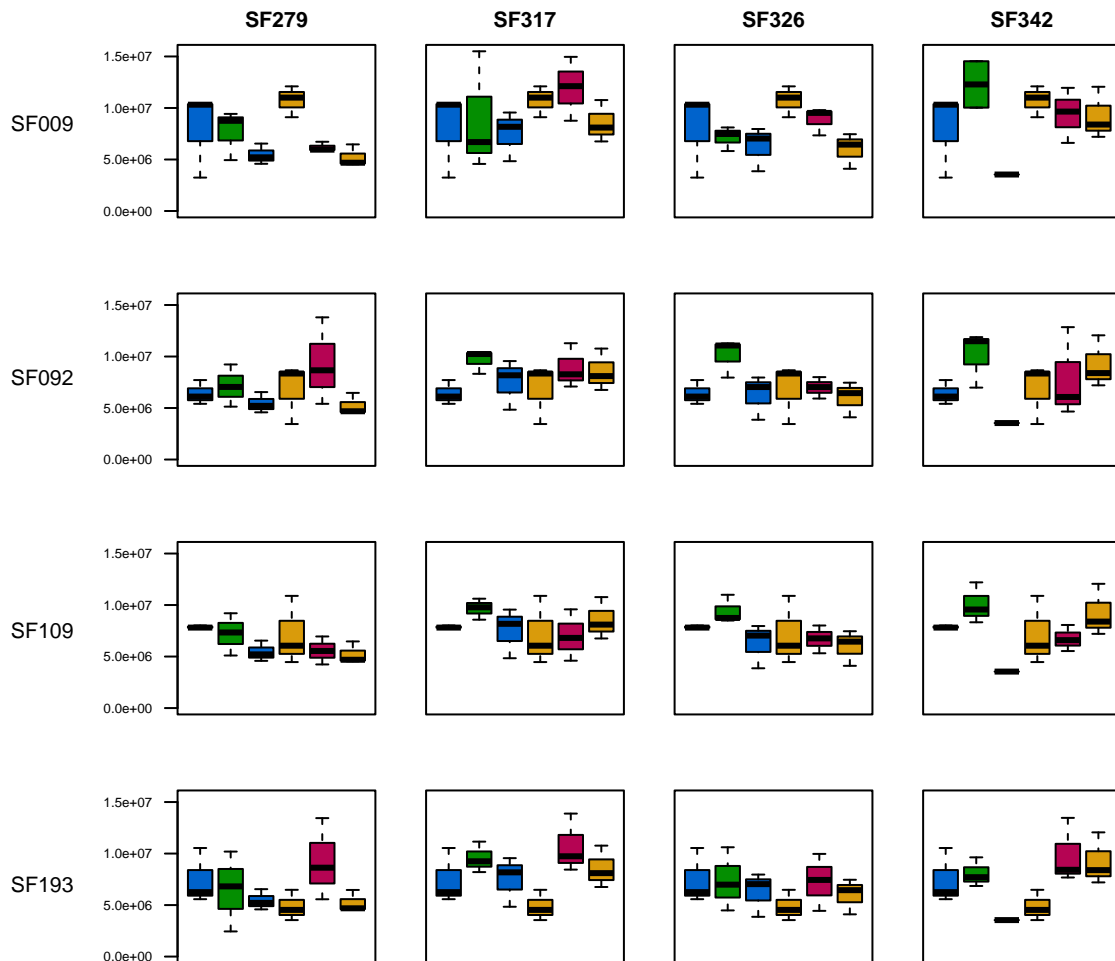

HanXRQChr07g0190491  
Putative rmlC-like jelly roll fold

Parents WW  
Parents WD  
Hybrids WW  
Hybrids WD

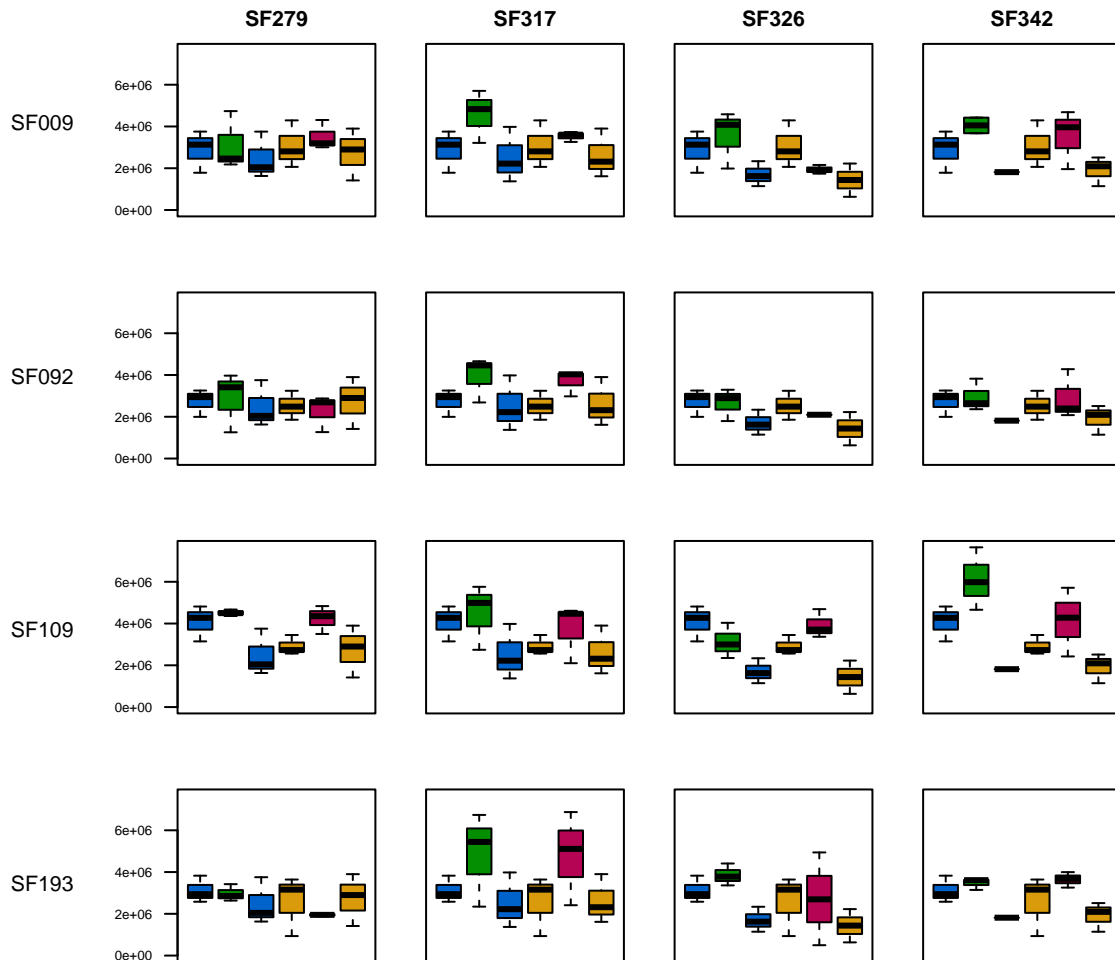

HanXRQChr12g0367151  
 Probable phenylalanyl-tRNA synthetase  
 class IIc family protein

Parents WW  
 Parents WD  
 Hybrids WW  
 Hybrids WD

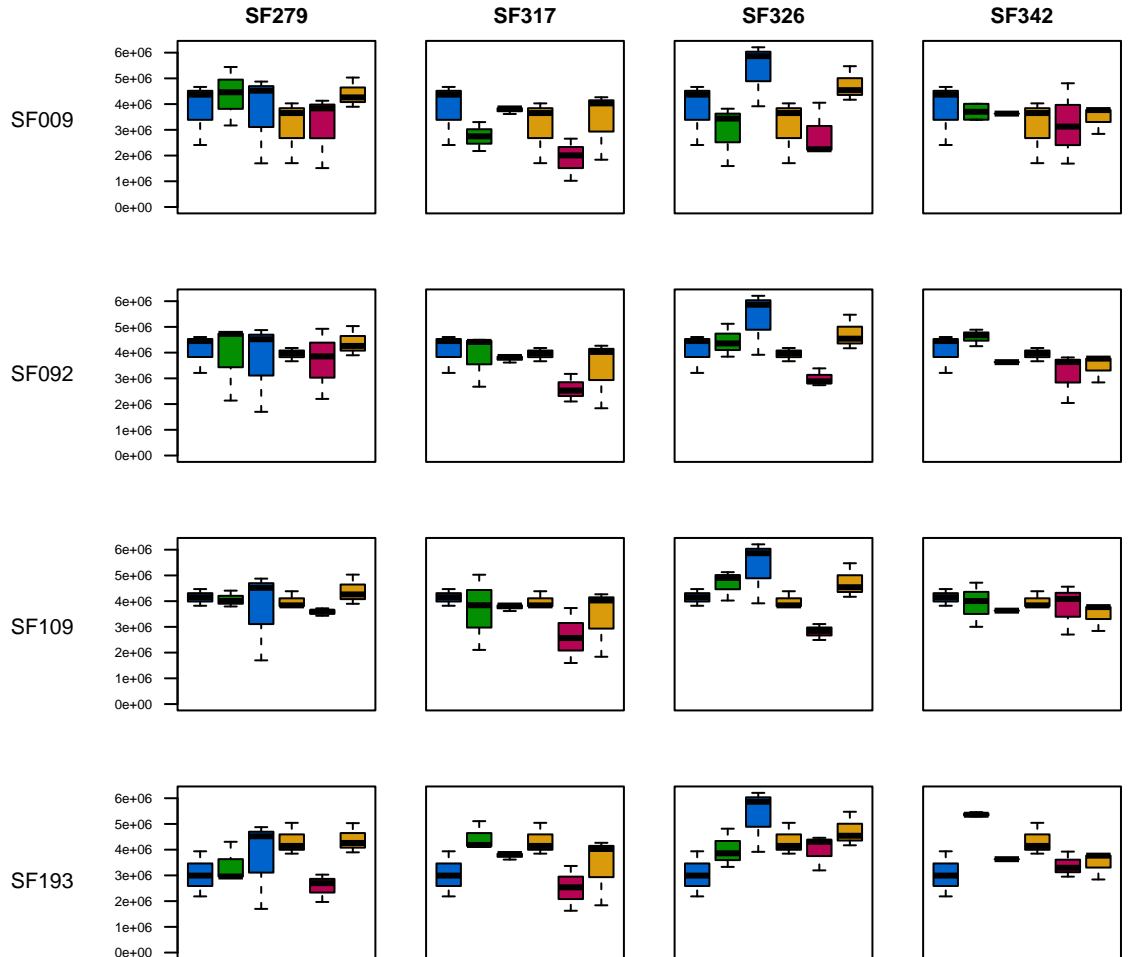

HanXRQChr10g0319011  
Probable mitochondrial-processing  
peptidase subunit alpha EC=1.10.2.2

Parents WW  
Parents WD  
Hybrids WW  
Hybrids WD

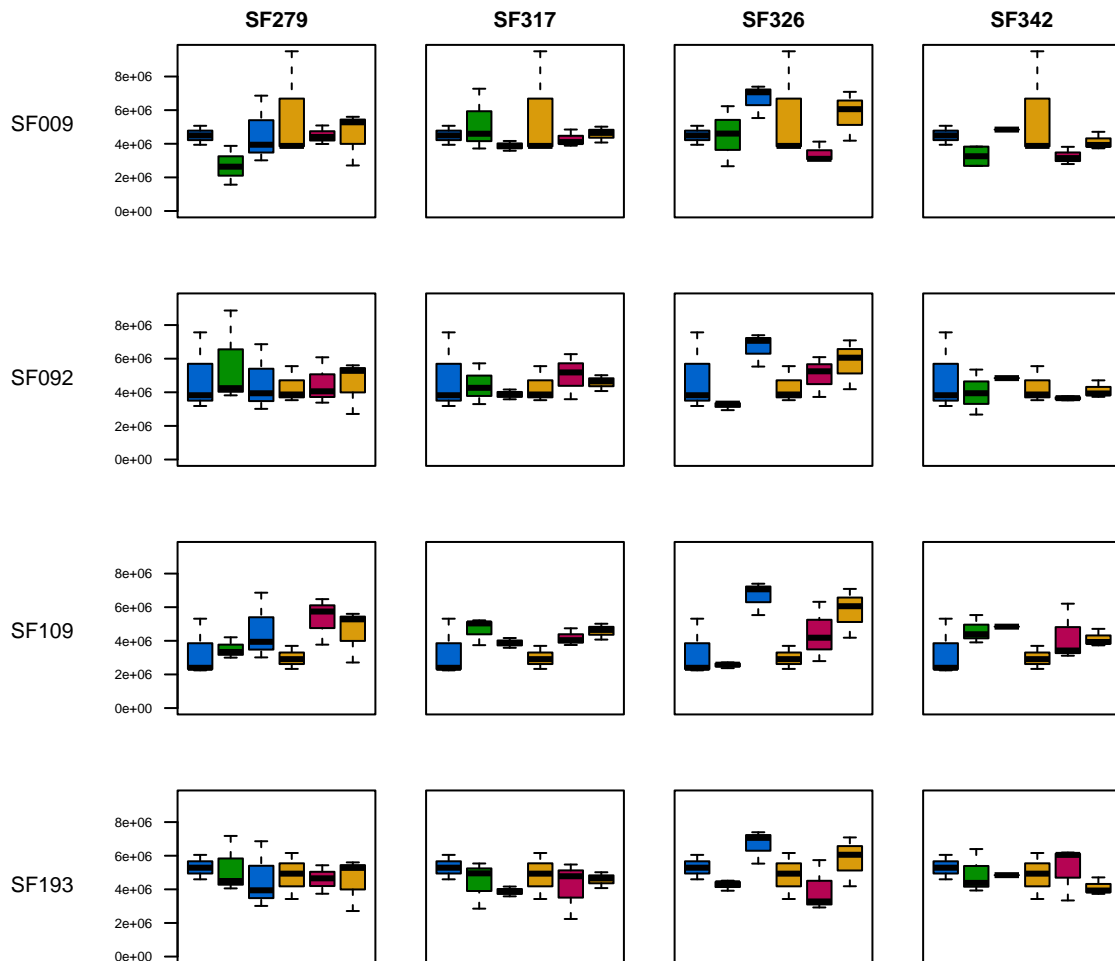



HanXRQChr01g0019411  
Putative ribosomal protein L11/L12

Parents WW  
Parents WD  
Hybrids WW  
Hybrids WD

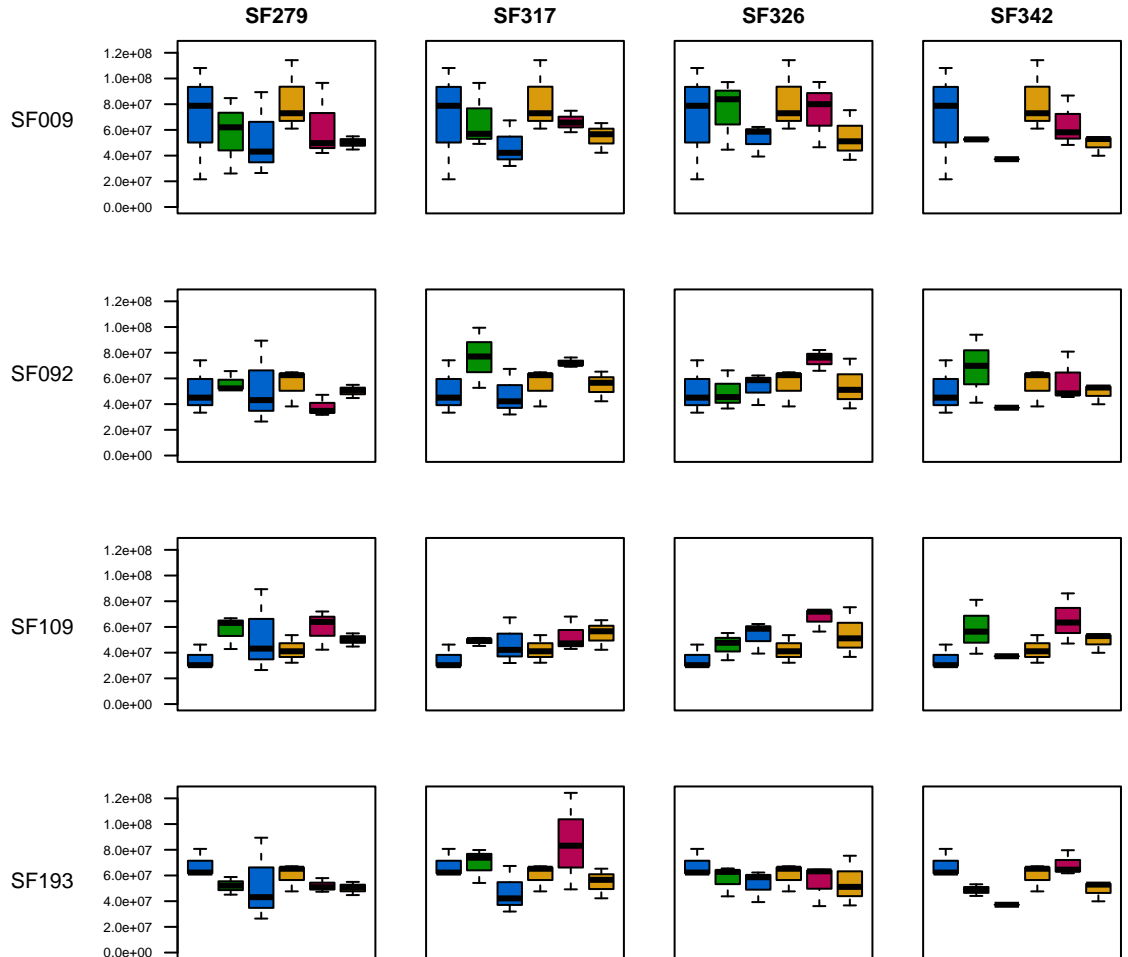

HanXRQChr08g0236571  
Probable geranylgeranyl diphosphate  
reductase, chloroplastic

Parents WW  
Parents WD  
Hybrids WW  
Hybrids WD

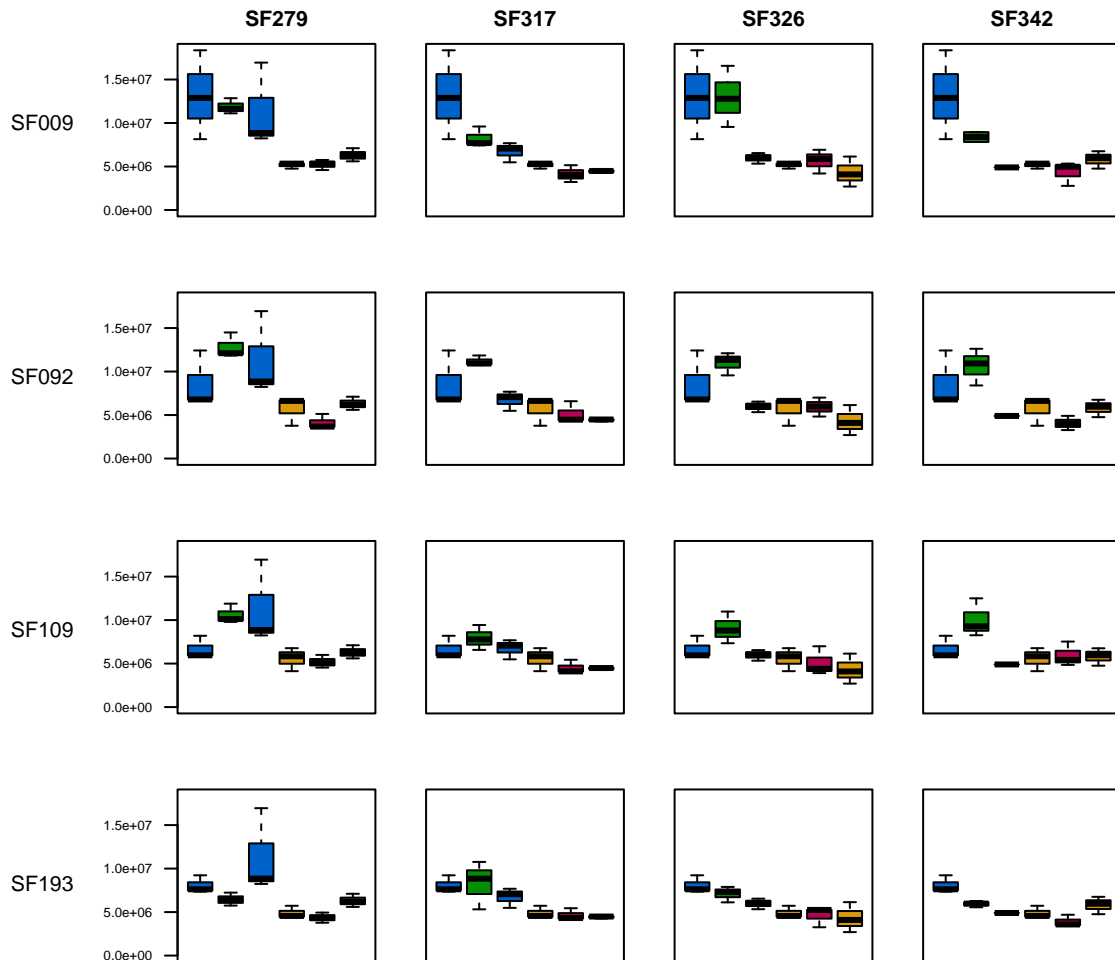

HanXRQChr08g0216051  
Probable cold-regulated 47

Parents WW  
Parents WD  
Hybrids WW  
Hybrids WD

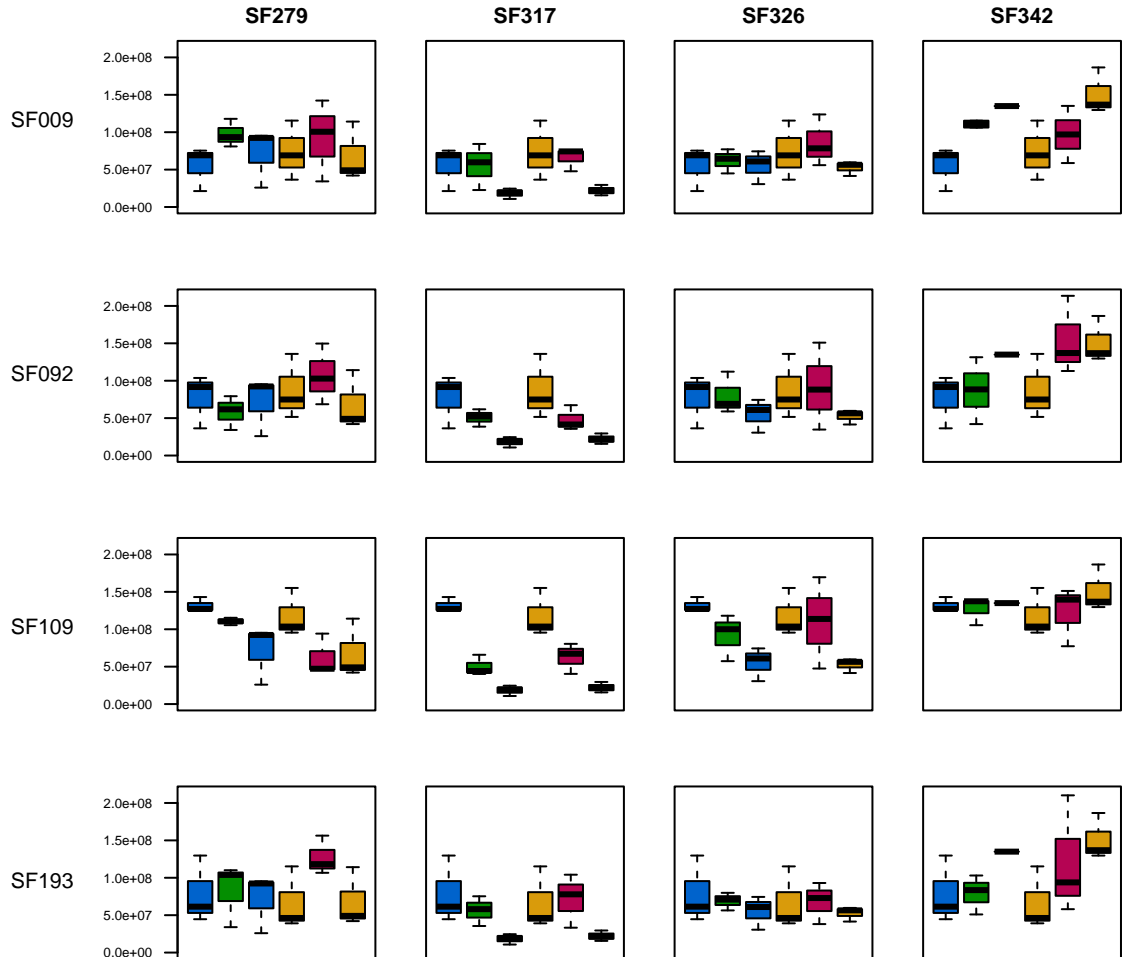

HanXRQChr13g0414711  
 Probable fructose-bisphosphate aldolase  
 1

Parents WW  
 Parents WD  
 Hybrids WW  
 Hybrids WD

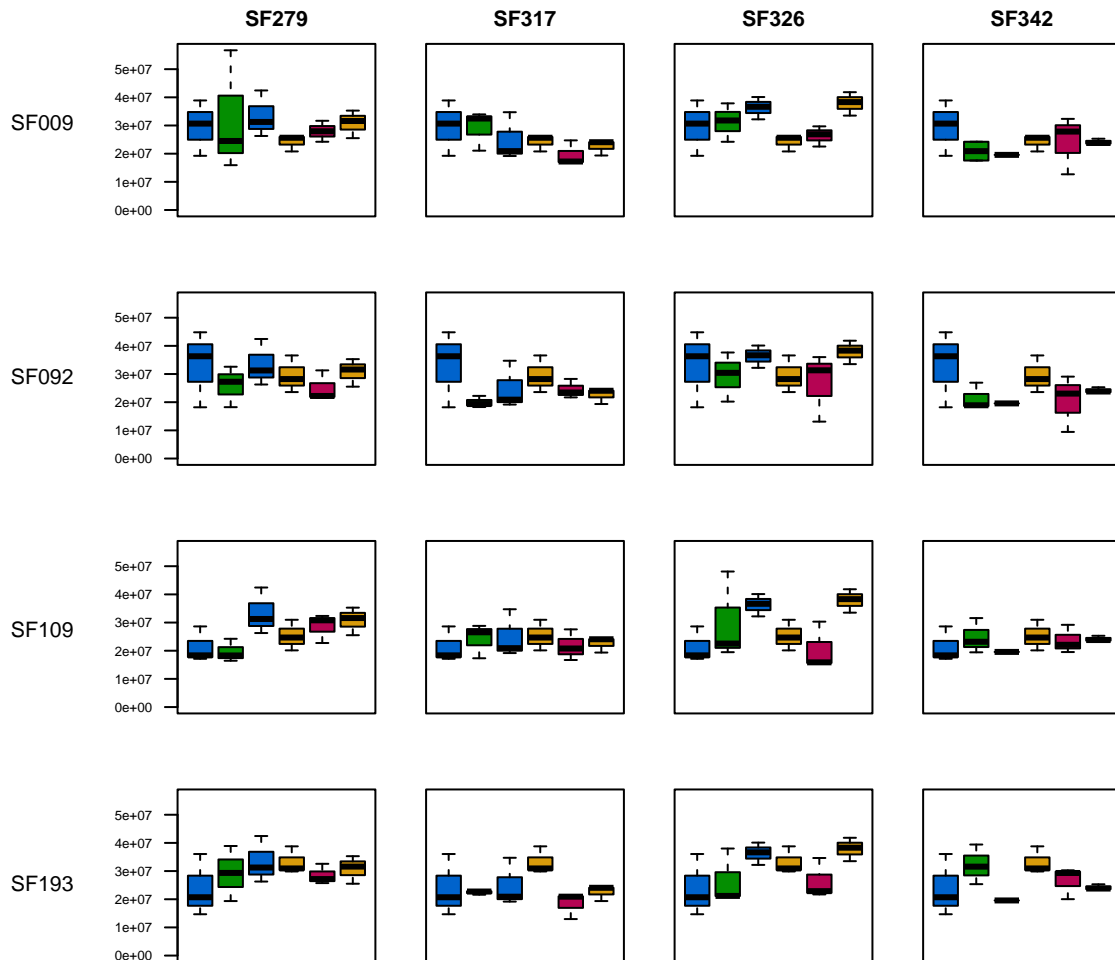

HanXRQChr10g0278591  
Probable peroxidase superfamily protein

Parents WW  
Parents WD  
Hybrids WW  
Hybrids WD

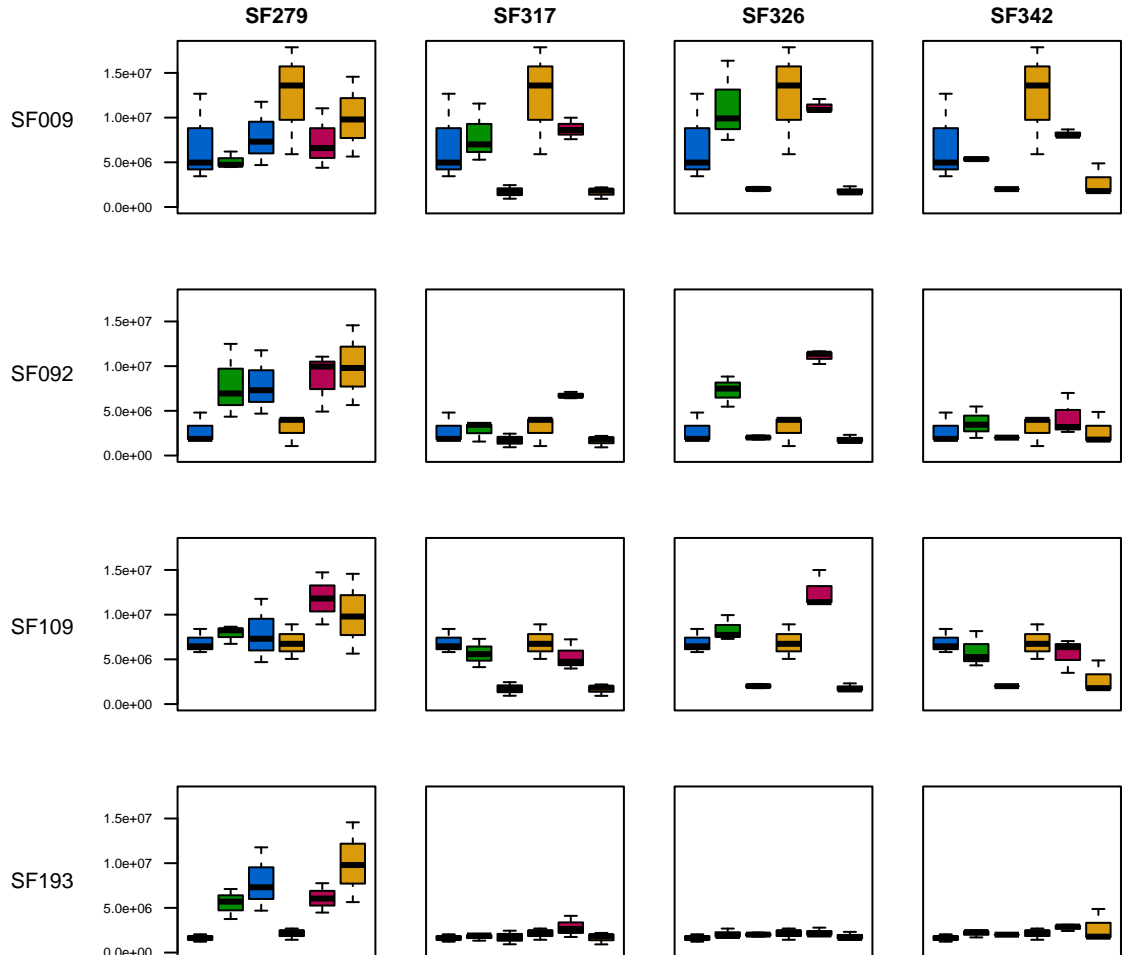

HanXRQChr06g0170251  
Probable NAD(P)-binding Rossmann-fold  
superfamily protein

Parents WW  
Parents WD  
Hybrids WW  
Hybrids WD

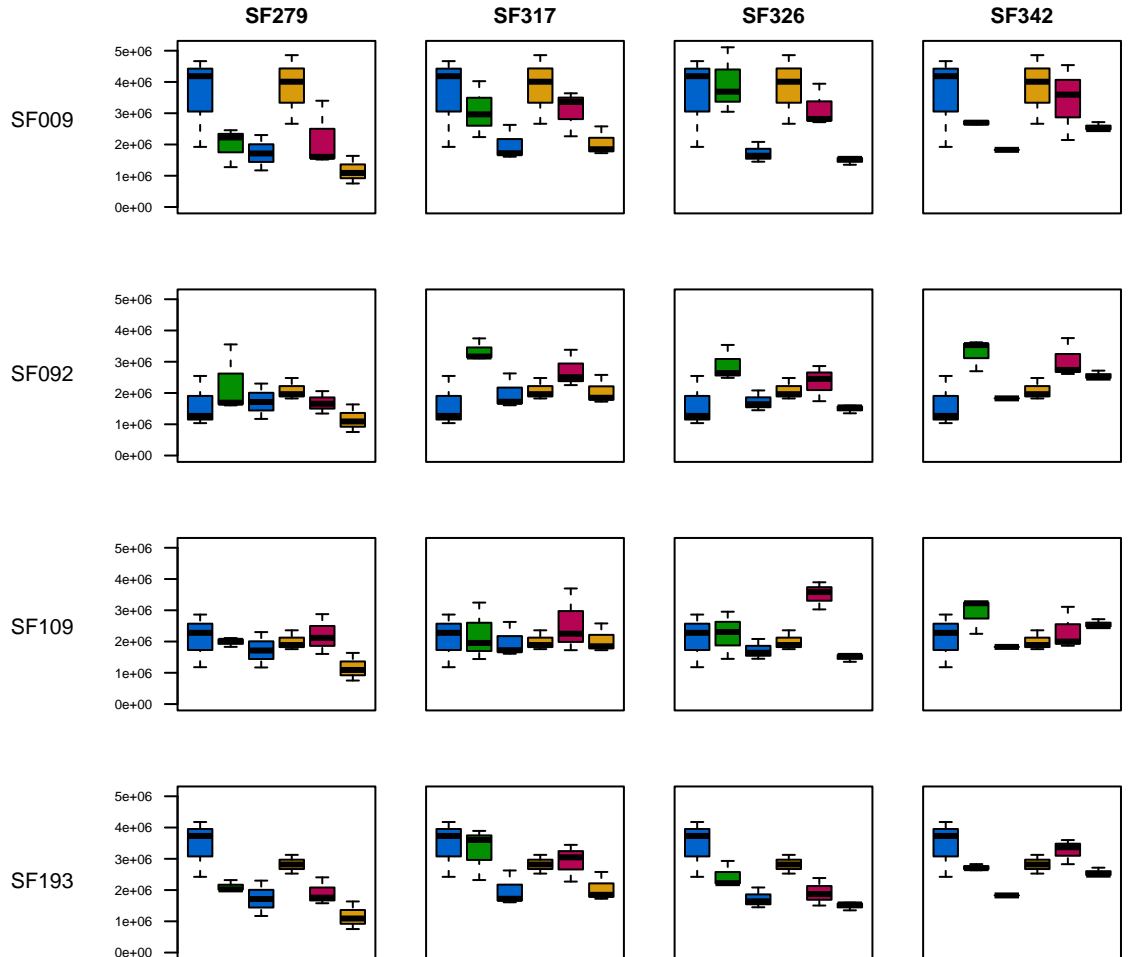

HanXRQChr05g0142571  
Putative ribosomal protein L15e;  
Ribosomal protein L15e core domain

Parents WW  
Parents WD  
Hybrids WW  
Hybrids WD

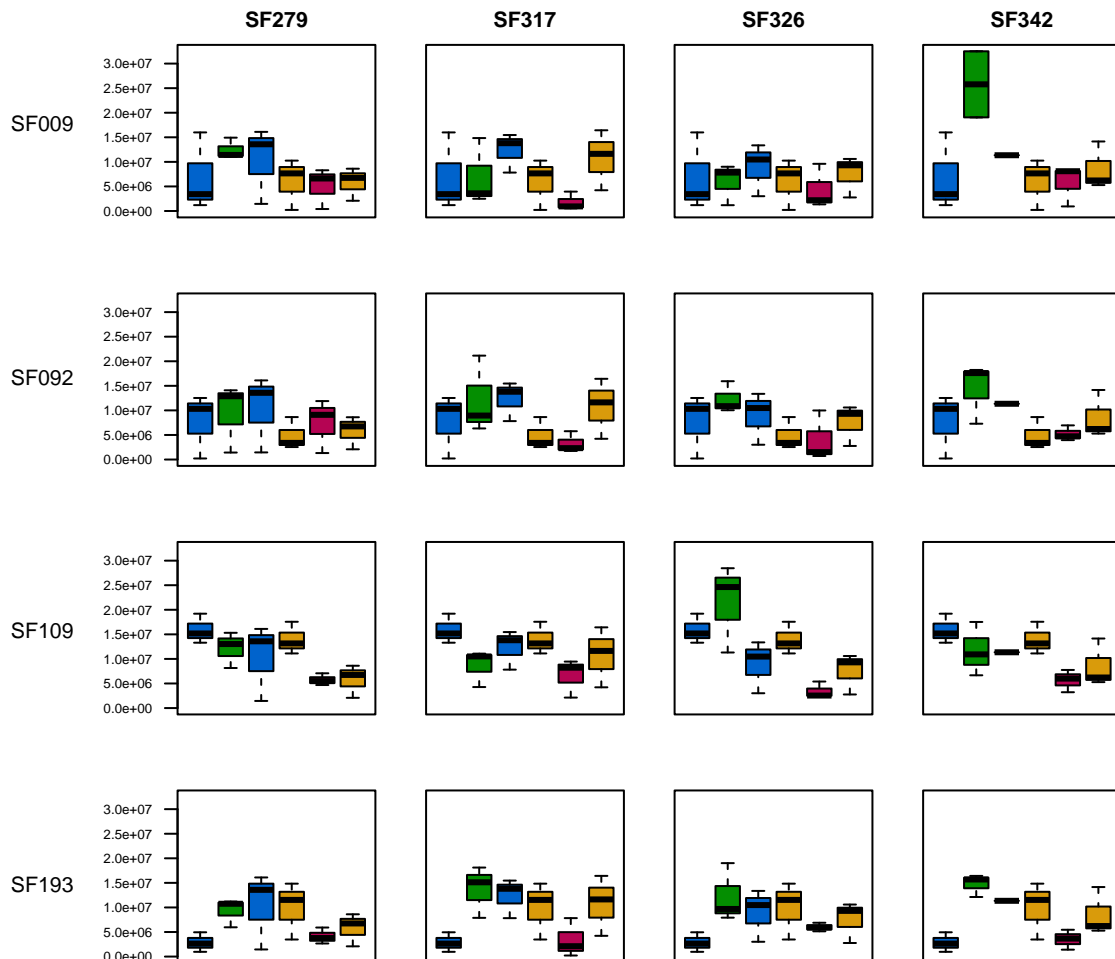

HanXRQChr12g0355221  
 Probable mitochondrial-processing  
 peptidase subunit alpha

Parents WW  
 Parents WD  
 Hybrids WW  
 Hybrids WD

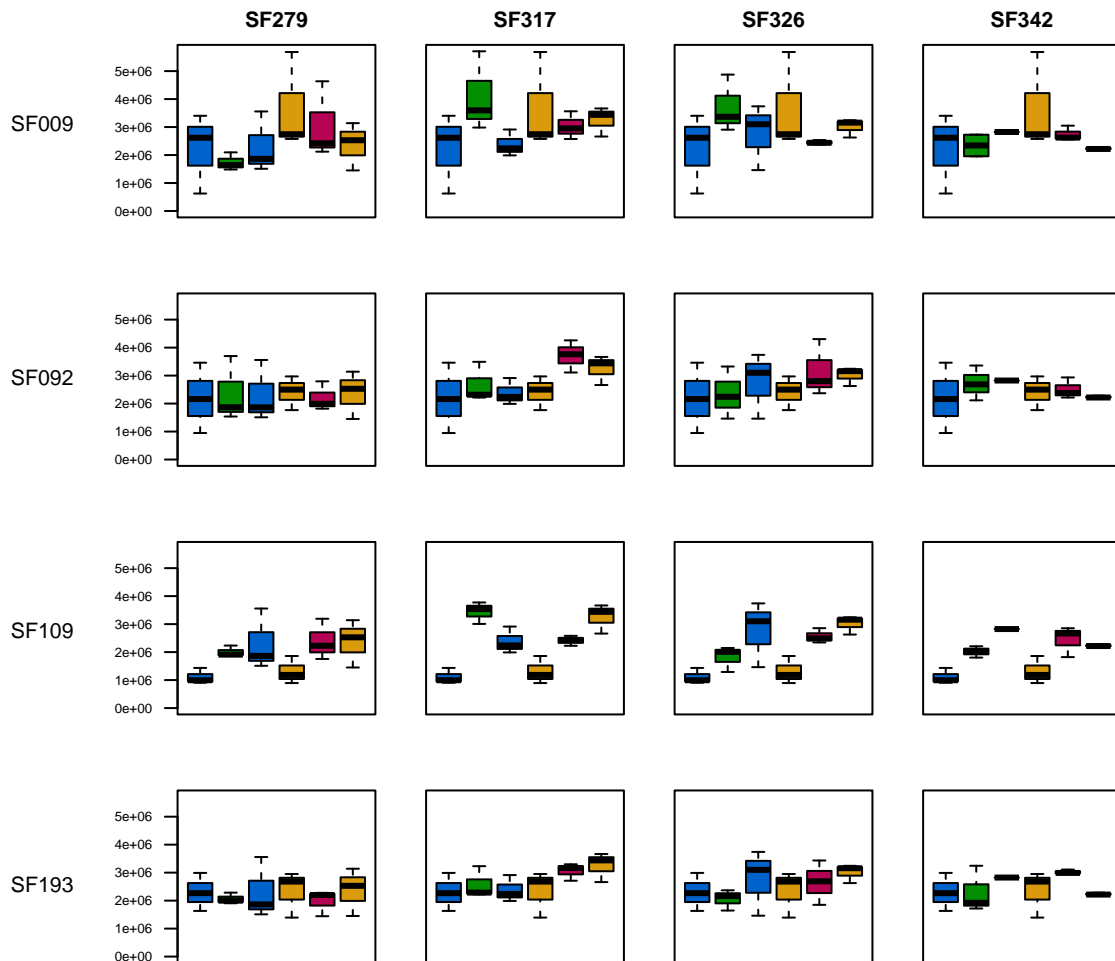



HanXRQChr10g0280751  
Probable succinyl-CoA ligase  
[ADP-forming] subunit beta, mitochondrial

Parents WW  
Parents WD  
Hybrids WW  
Hybrids WD

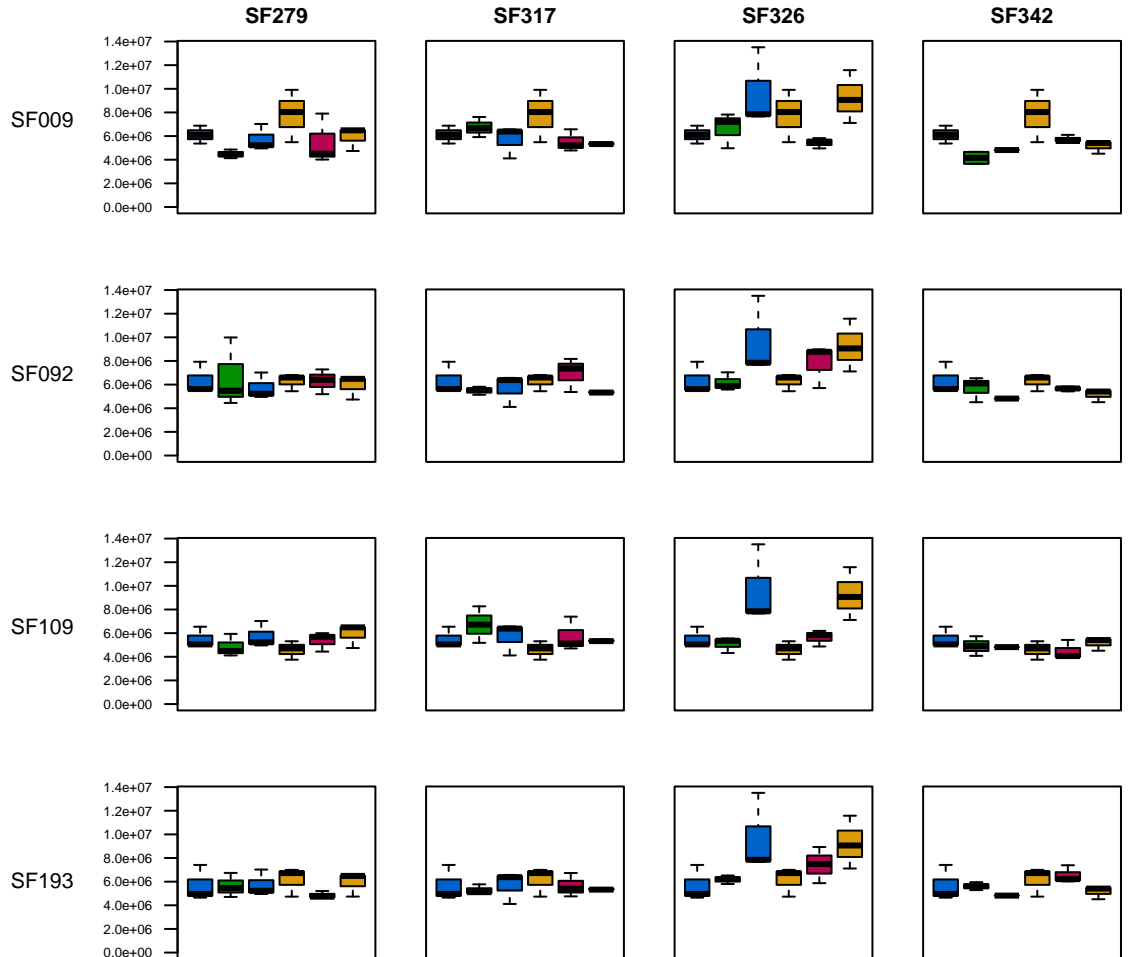

HanXRQChr01g0011731  
 Probable ran-specific GTPase-activating  
 protein

Parents WW  
 Parents WD  
 Hybrids WW  
 Hybrids WD

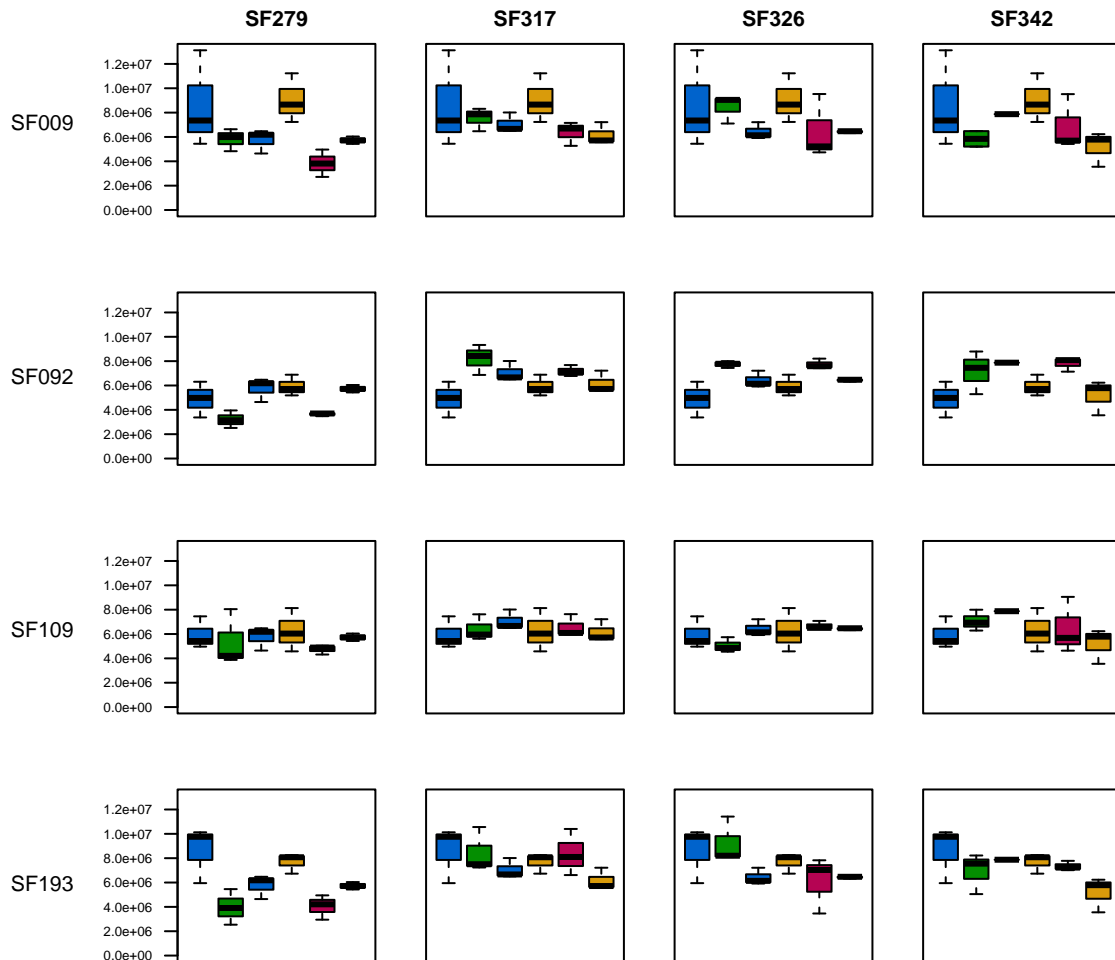

HanXRQChr08g0227401  
Probable FKBP-like peptidyl-prolyl  
cis-trans isomerase family protein

Parents WW  
Parents WD  
Hybrids WW  
Hybrids WD

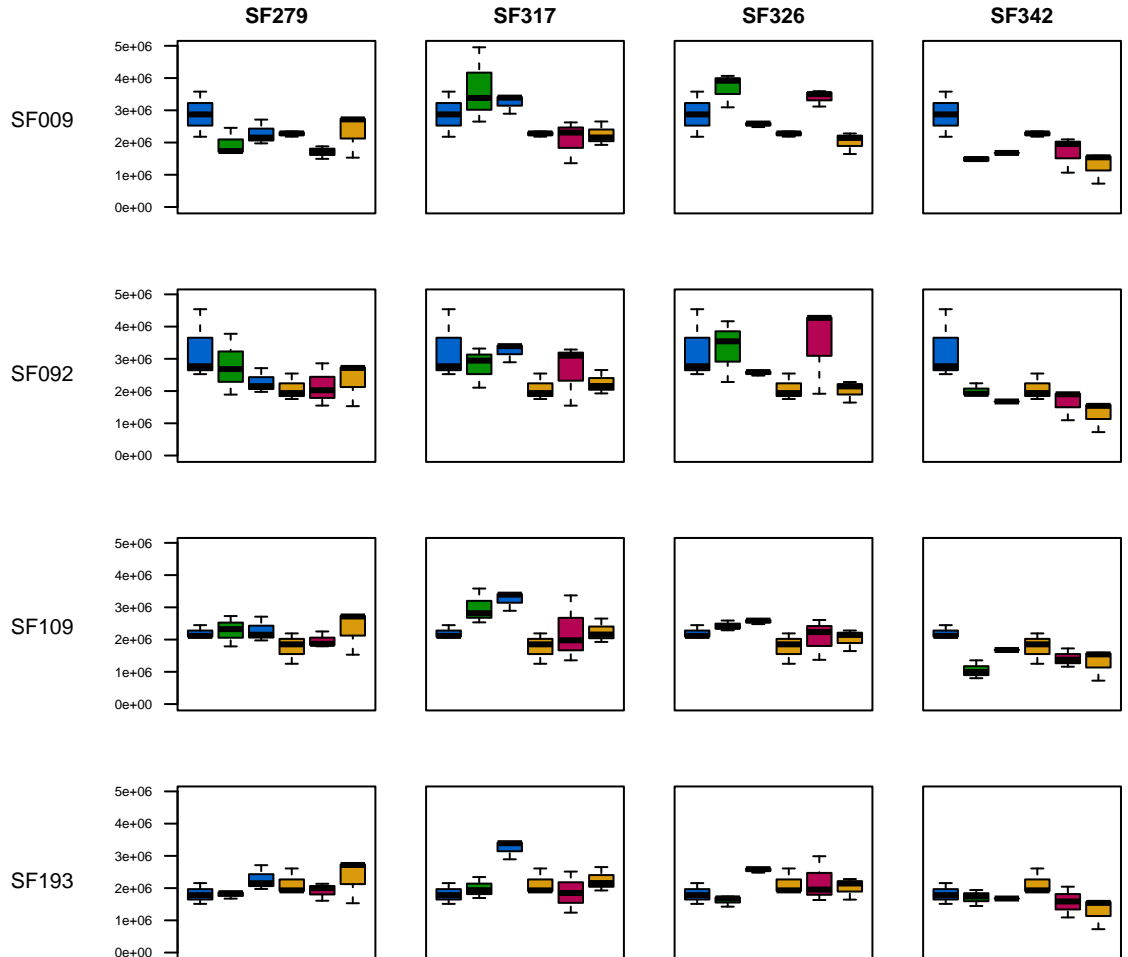

HanXRQChr08g0234181  
Putative flavoprotein WrbA;  
Flavoprotein-like domain

Parents WW  
Parents WD  
Hybrids WW  
Hybrids WD

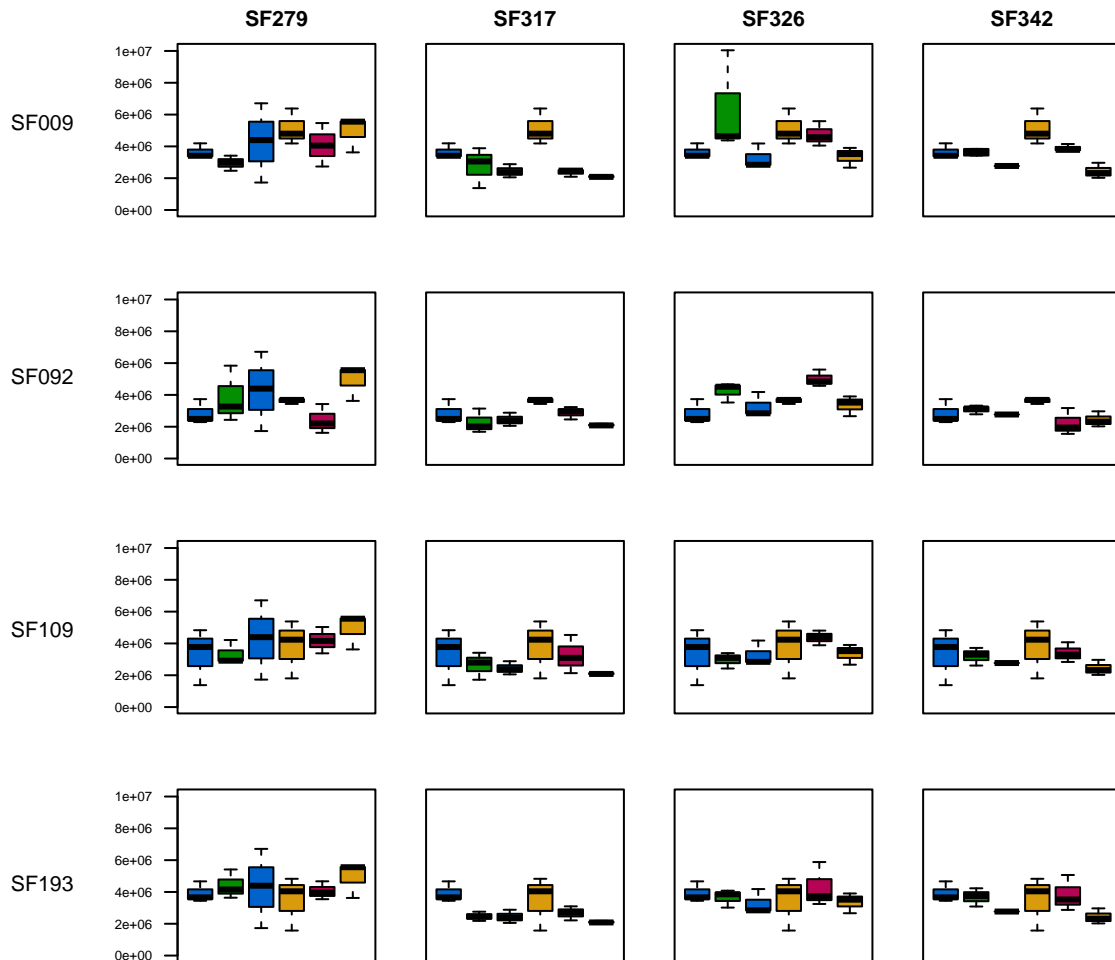

HanXRQChr16g0526461  
Probable proteasome subunit beta type-2

Parents WW  
Parents WD  
Hybrids WW  
Hybrids WD

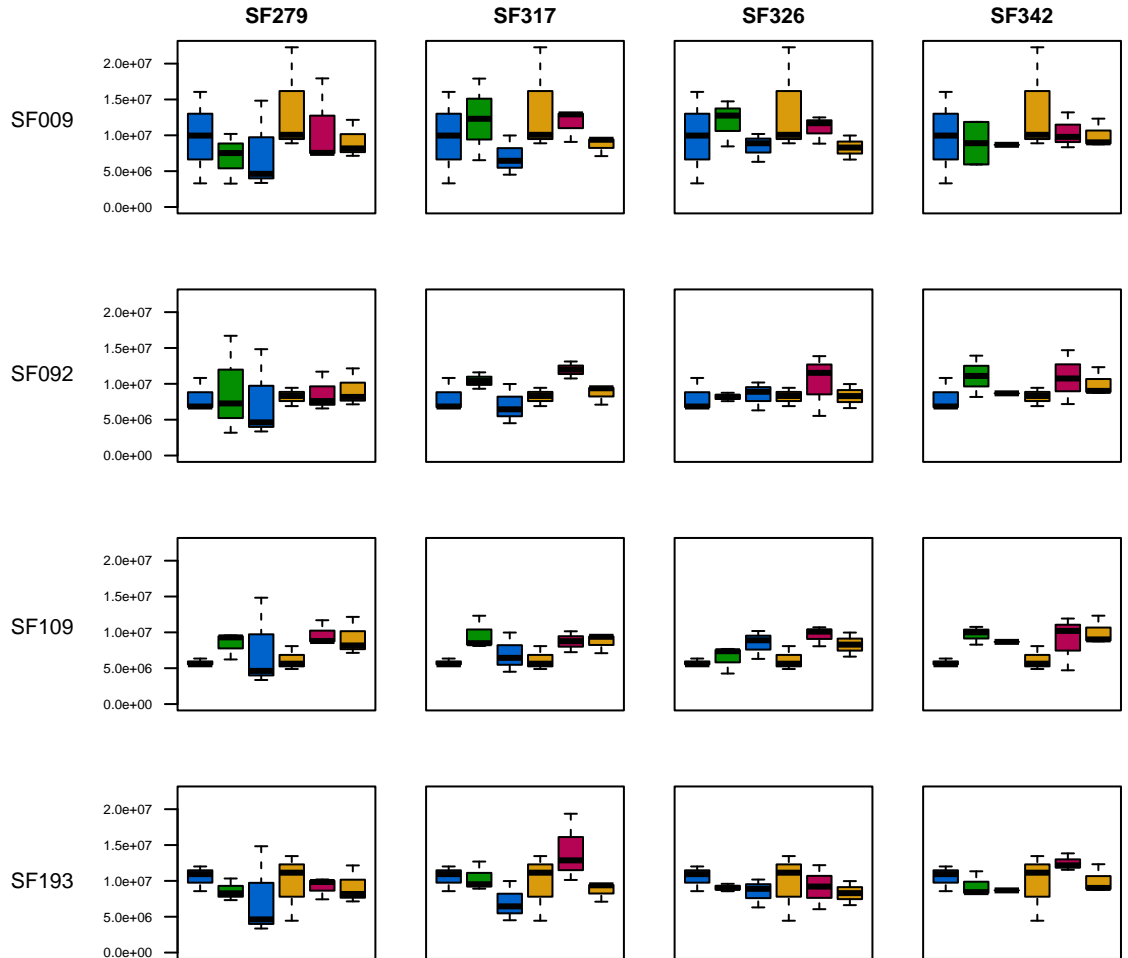

HanXRQChr10g0301191  
Probable plastid transcriptionally  
active 12

Parents WW  
Parents WD  
Hybrids WW  
Hybrids WD

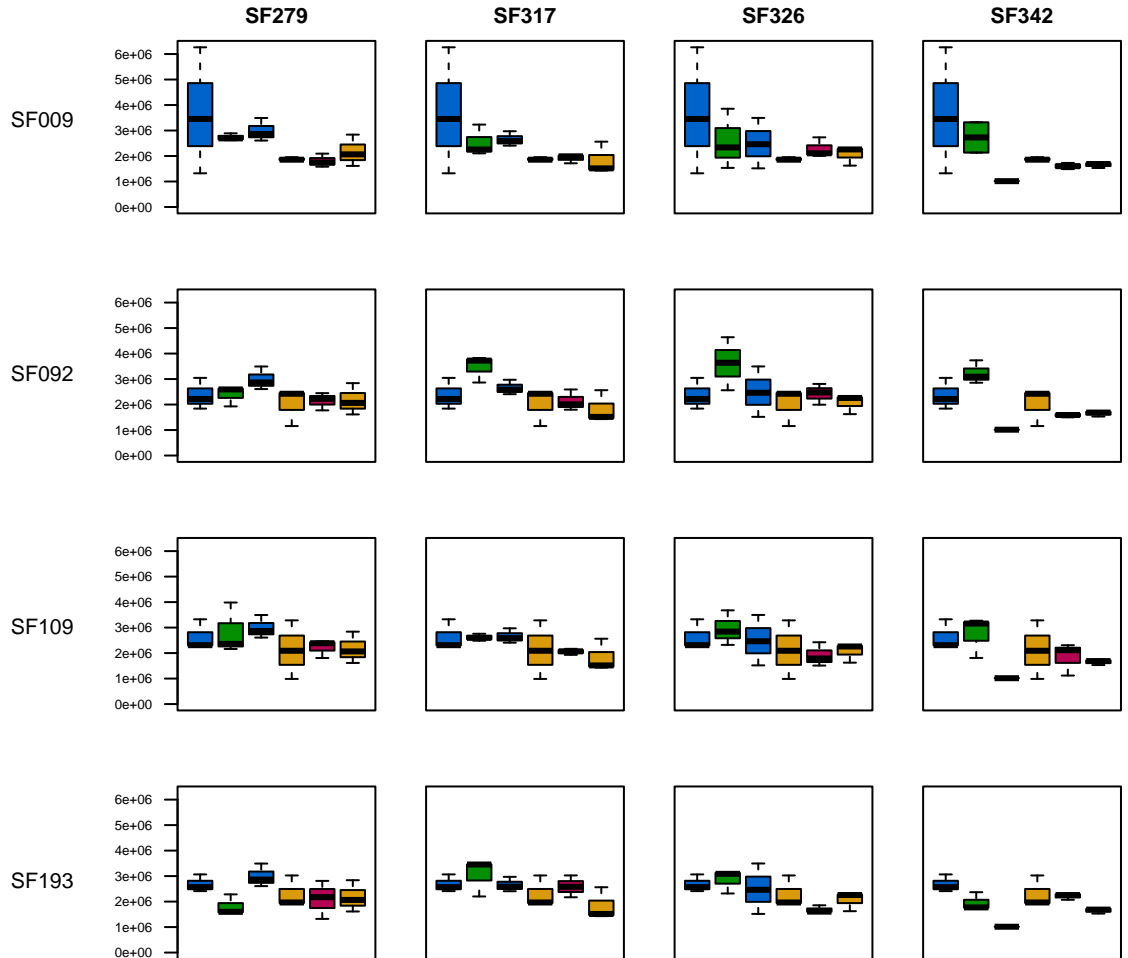

HanXRQCPg0580211  
Putative ribosomal protein L16;  
Ribosomal protein L10e/L16

Parents WW  
Parents WD  
Hybrids WW  
Hybrids WD

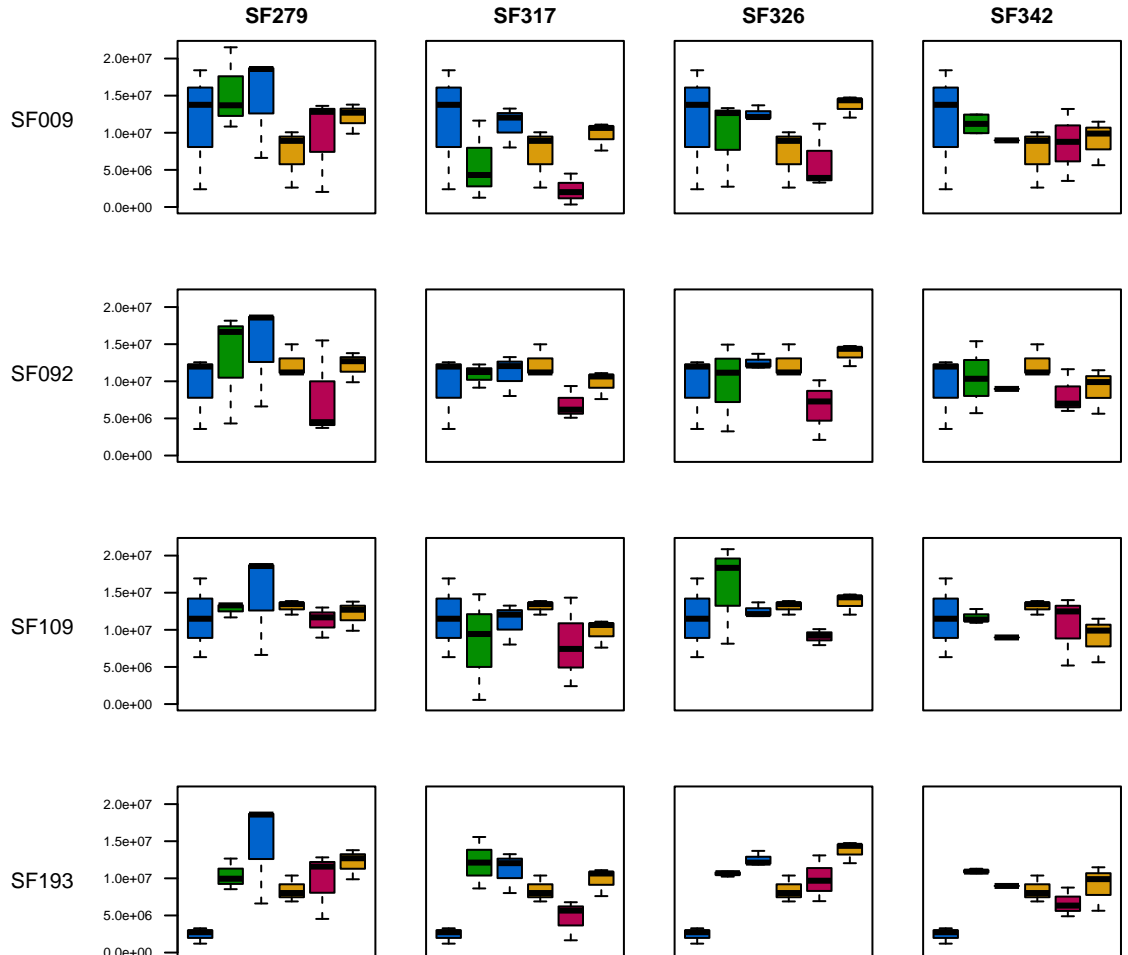

HanXRQChr09g0260321  
Probable DPP6 N-terminal domain-like  
protein

Parents WW  
Parents WD  
Hybrids WW  
Hybrids WD

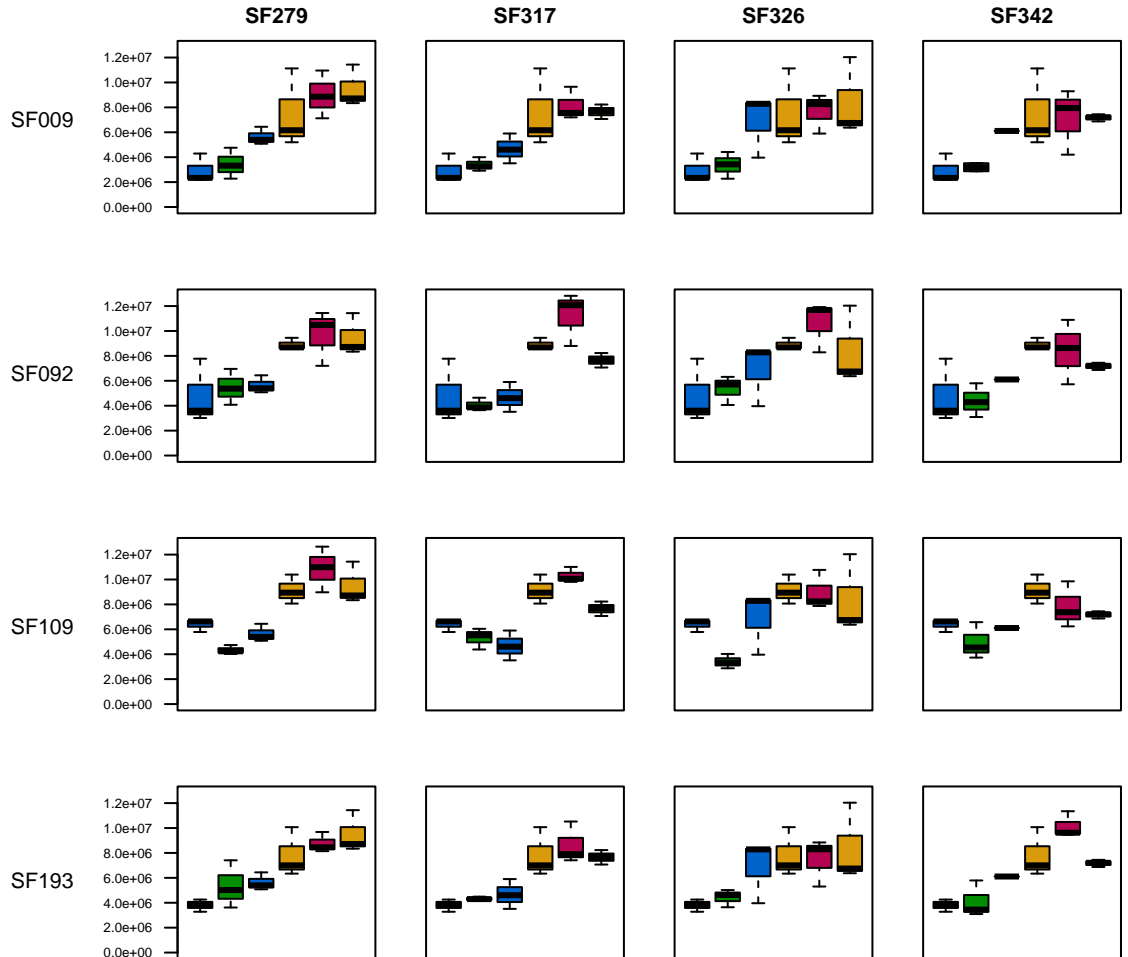



HanXRQChr05g0159361  
 Putative yjgF/YER057c/UK114 family;  
 Endoribonuclease L–PSP/chorismate muta

■ Parents WW  
 ■ Parents WD  
 ■ Hybrids WW  
 ■ Hybrids WD

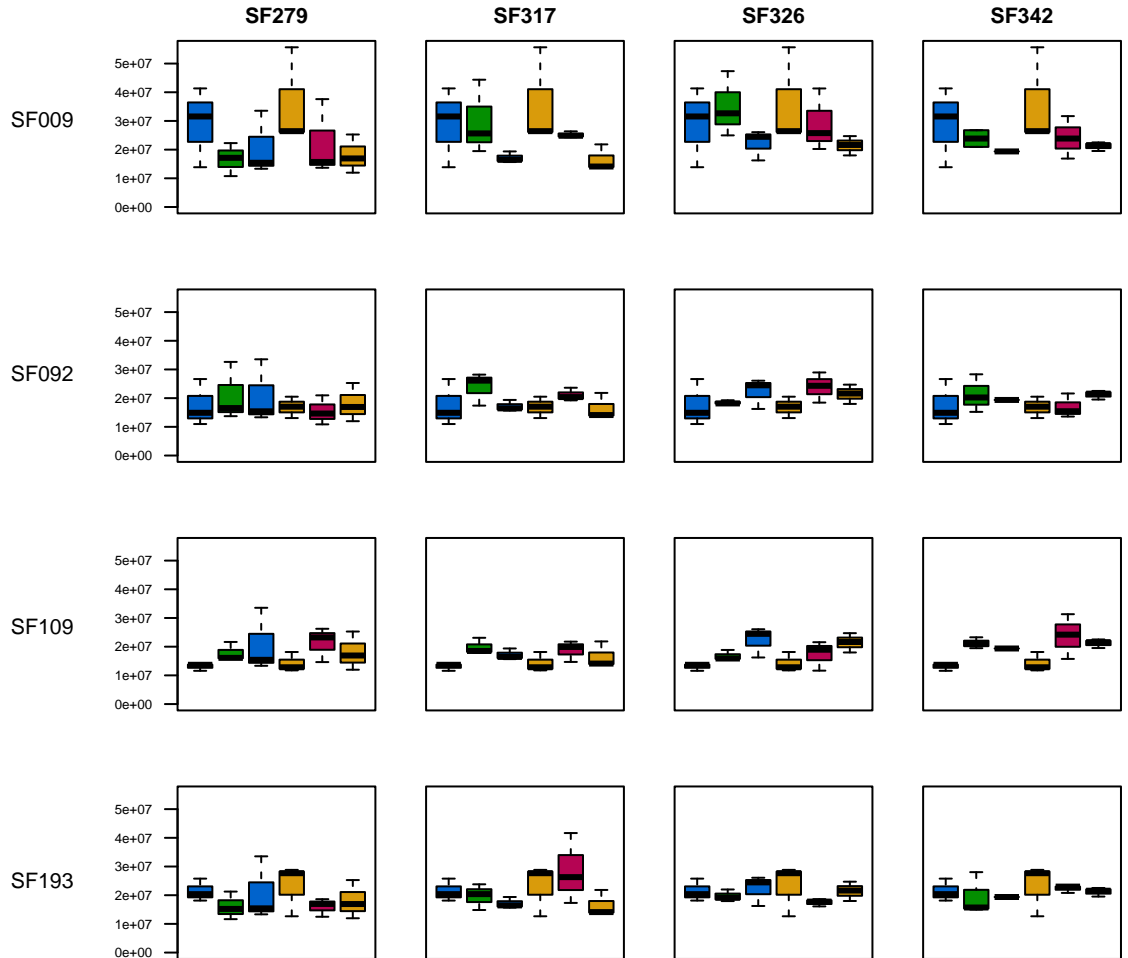

HanXRQChr08g0227971  
Probable tropomyosin-related

Parents WW  
Parents WD  
Hybrids WW  
Hybrids WD

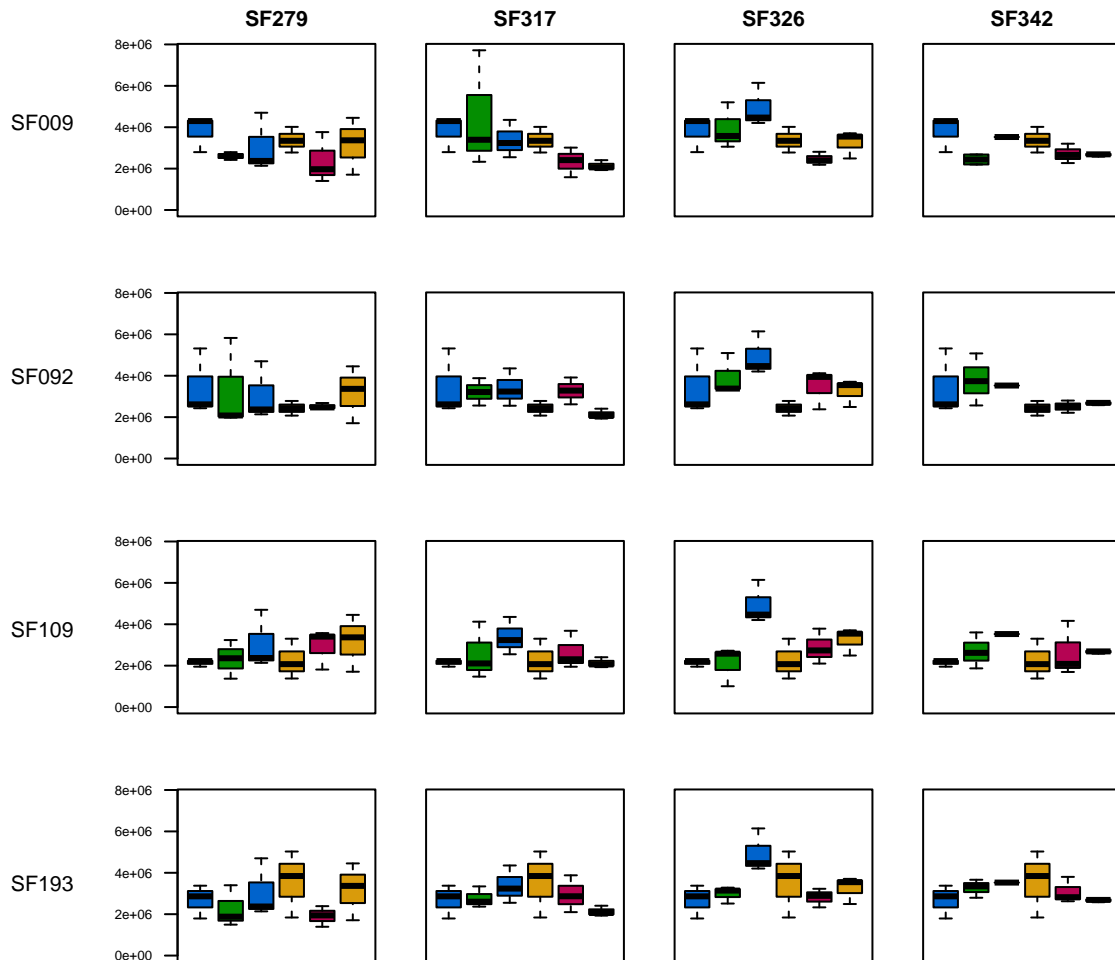

HanXRQChr03g0063181  
Putative sucrose phosphate synthase,  
plant; Sucrose-phosphate synthase, glycos

Parents WW  
Parents WD  
Hybrids WW  
Hybrids WD

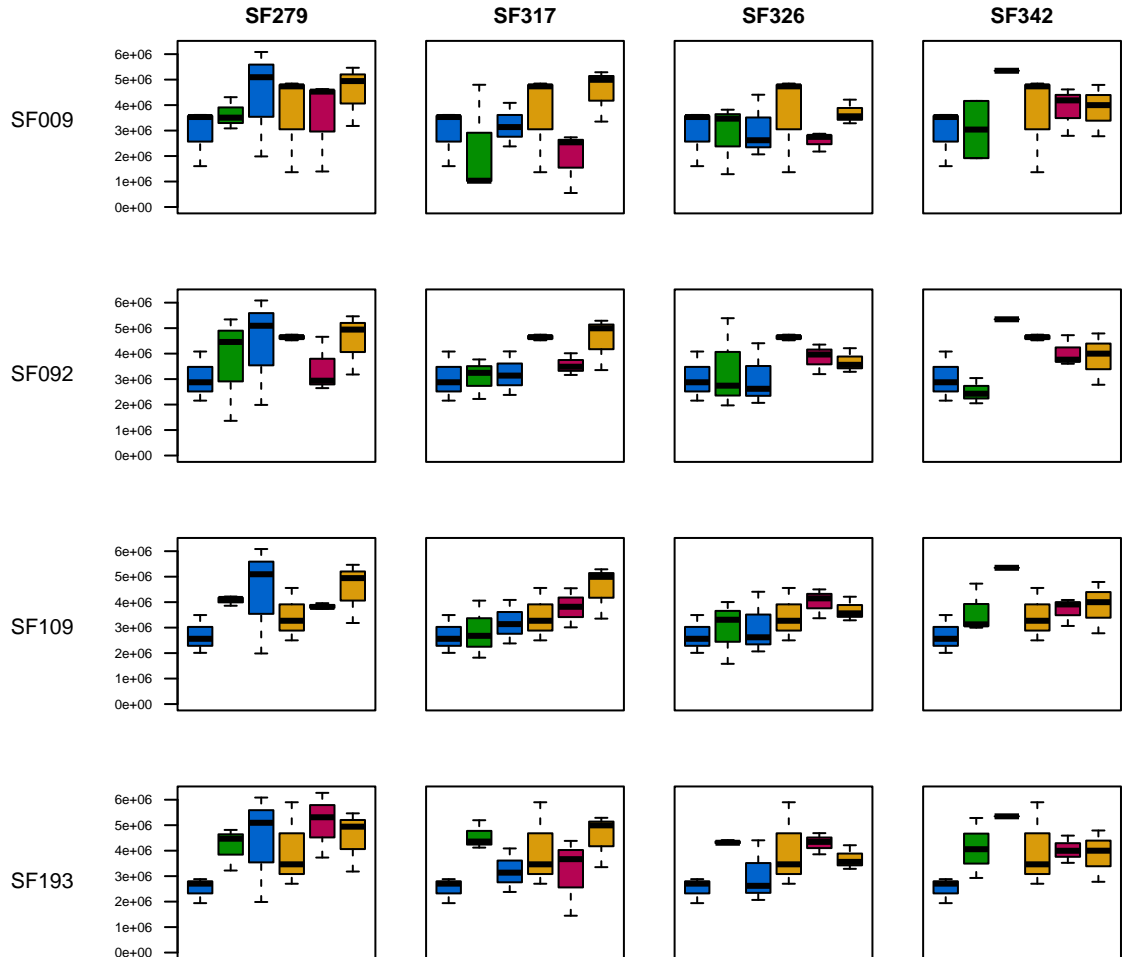

HanXRQChr17g0537871  
 Probable lysm domain GPI-anchored  
 protein 2 precursor

Parents WW  
 Parents WD  
 Hybrids WW  
 Hybrids WD

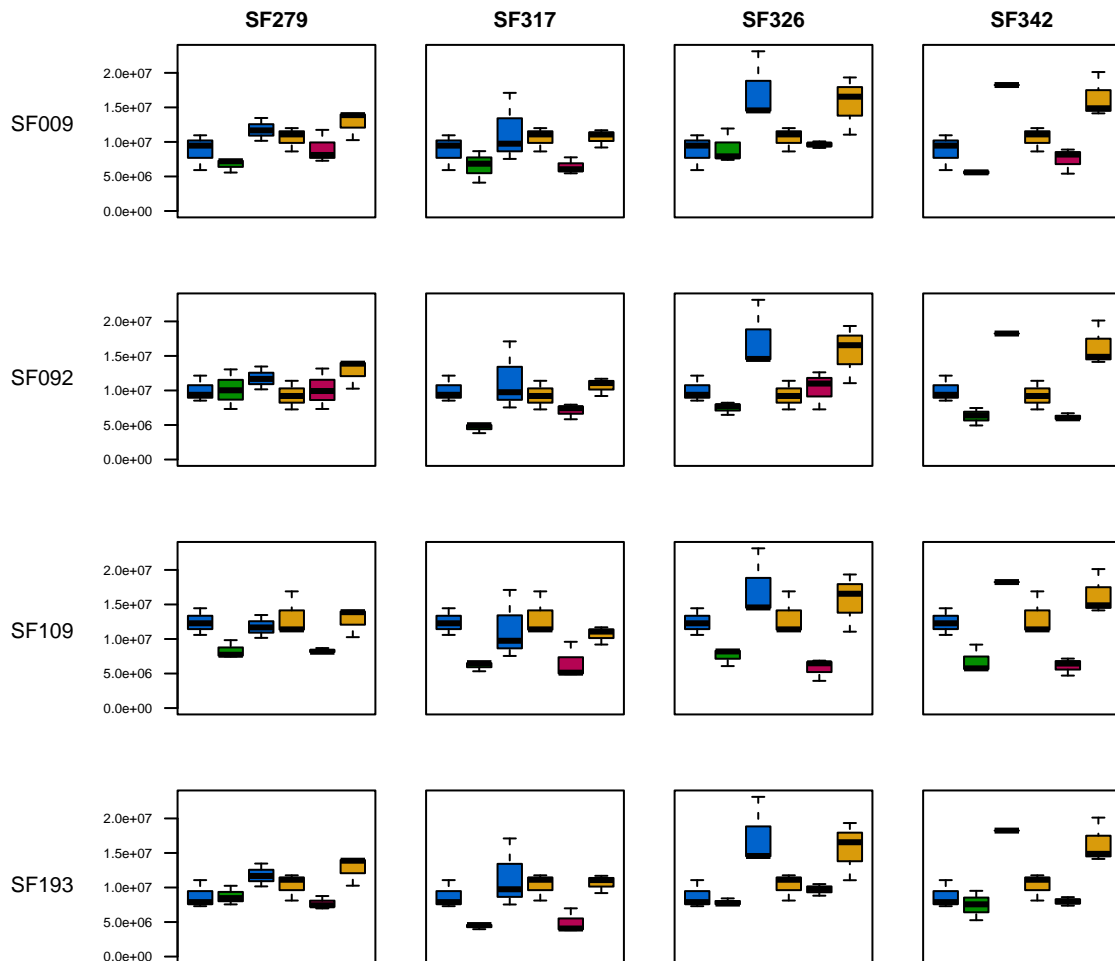

HanXRQChr10g0299511  
Probable chloroplast heat shock protein  
70-1

Parents WW  
Parents WD  
Hybrids WW  
Hybrids WD

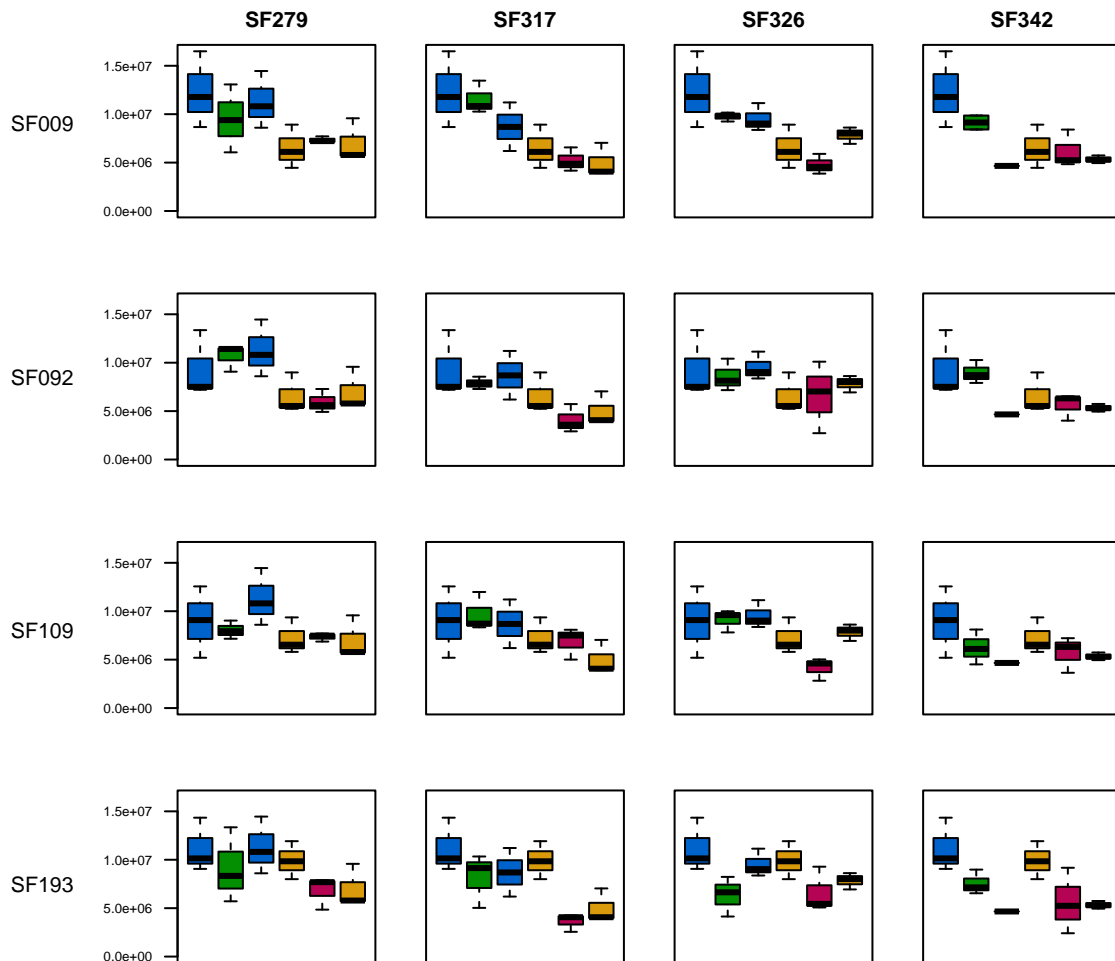

HanXRQChr03g0060471  
Putative ribosomal protein L13;  
Ribosomal protein L13, conserved site; Rib

Parents WW  
Parents WD  
Hybrids WW  
Hybrids WD

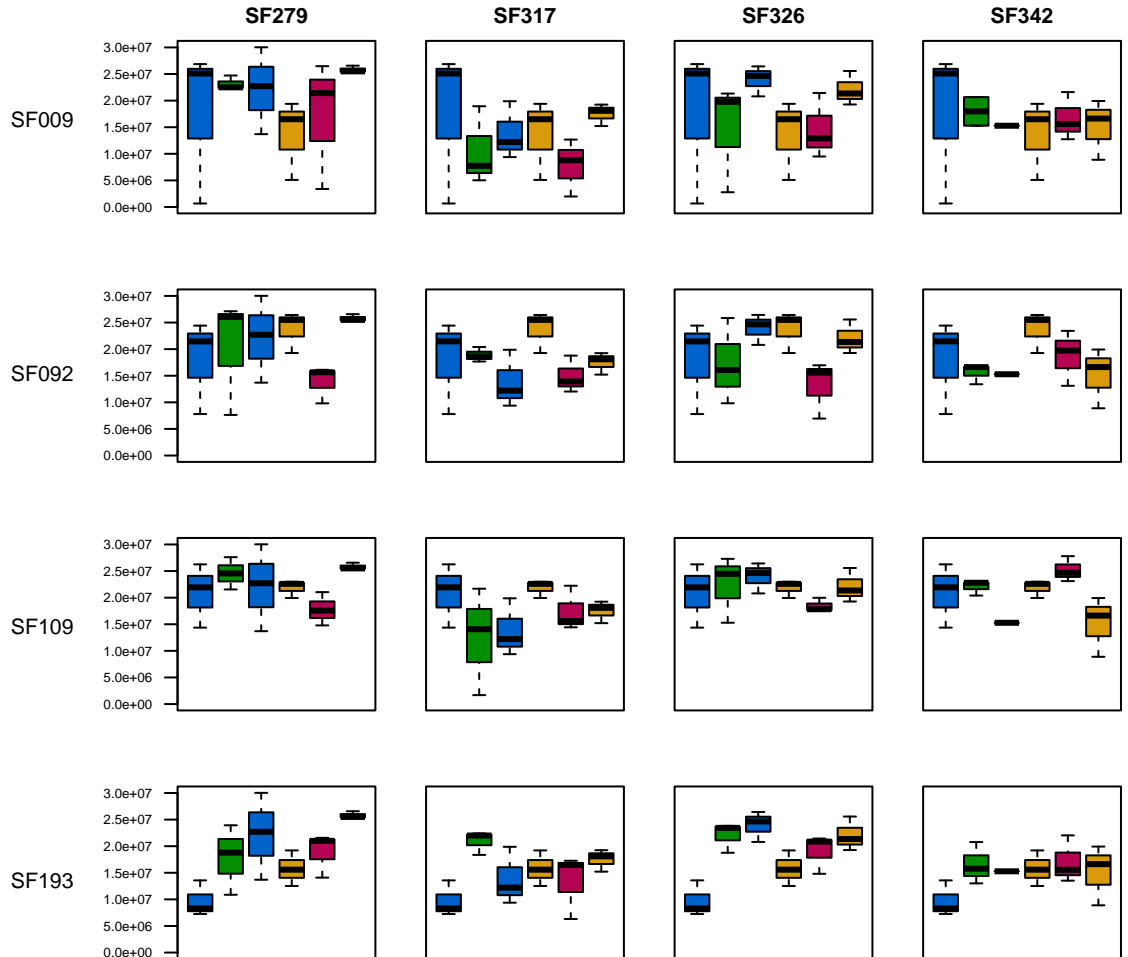

HanXRQChr12g0355131  
Probable hexokinase 2

Parents WW  
Parents WD  
Hybrids WW  
Hybrids WD

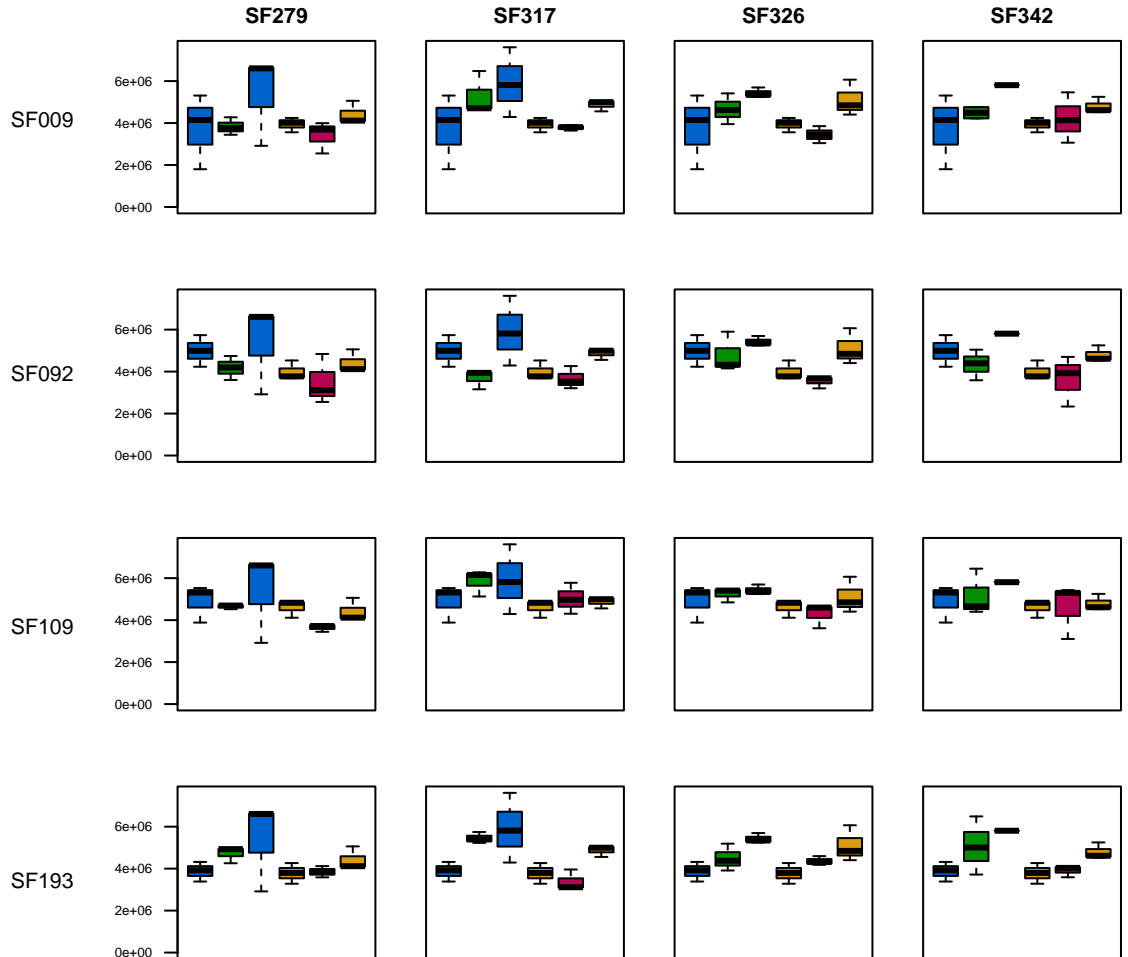

HanXRQChr13g0424331  
Probable cystatin B

- Parents WW
- Parents WD
- Hybrids WW
- Hybrids WD

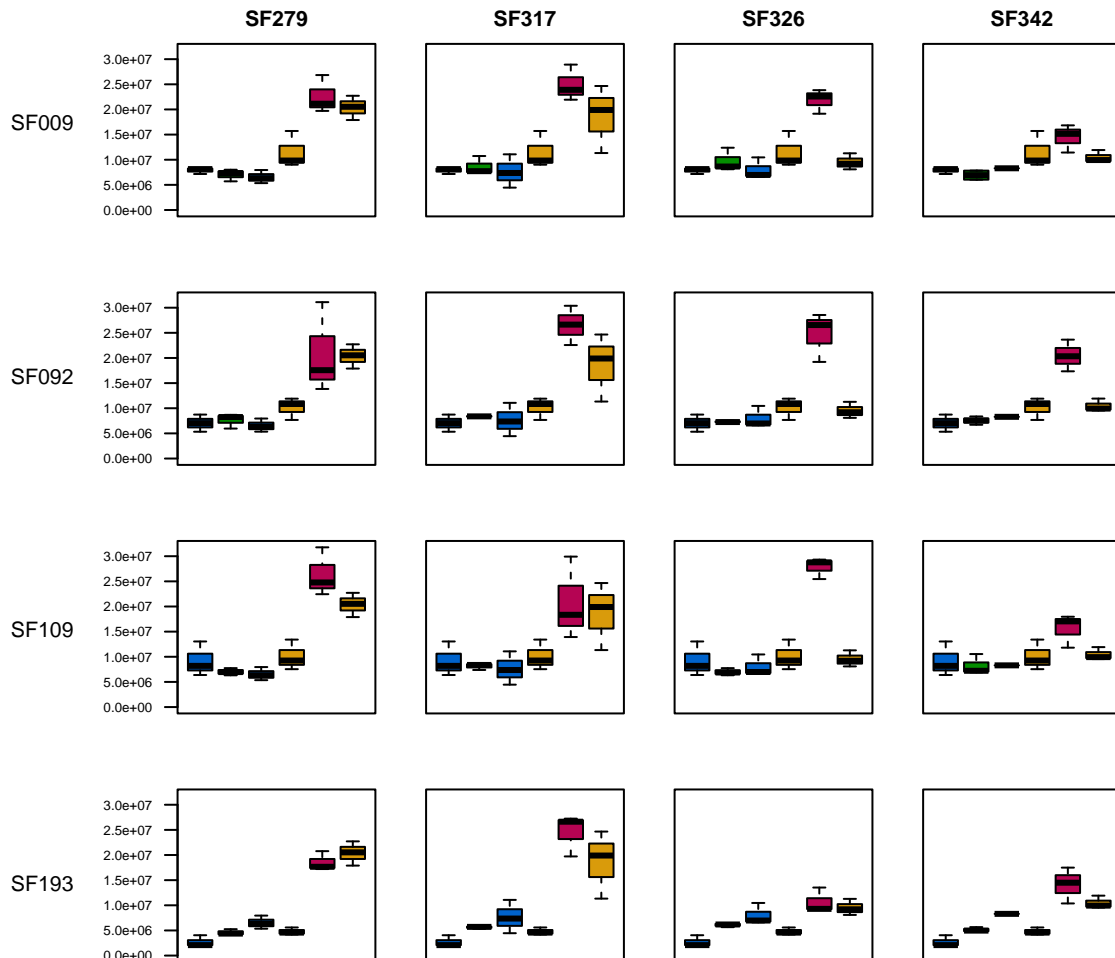



HanXRQChr15g0465921  
Putative HSP20-like chaperone

- Parents WW
- Parents WD
- Hybrids WW
- Hybrids WD

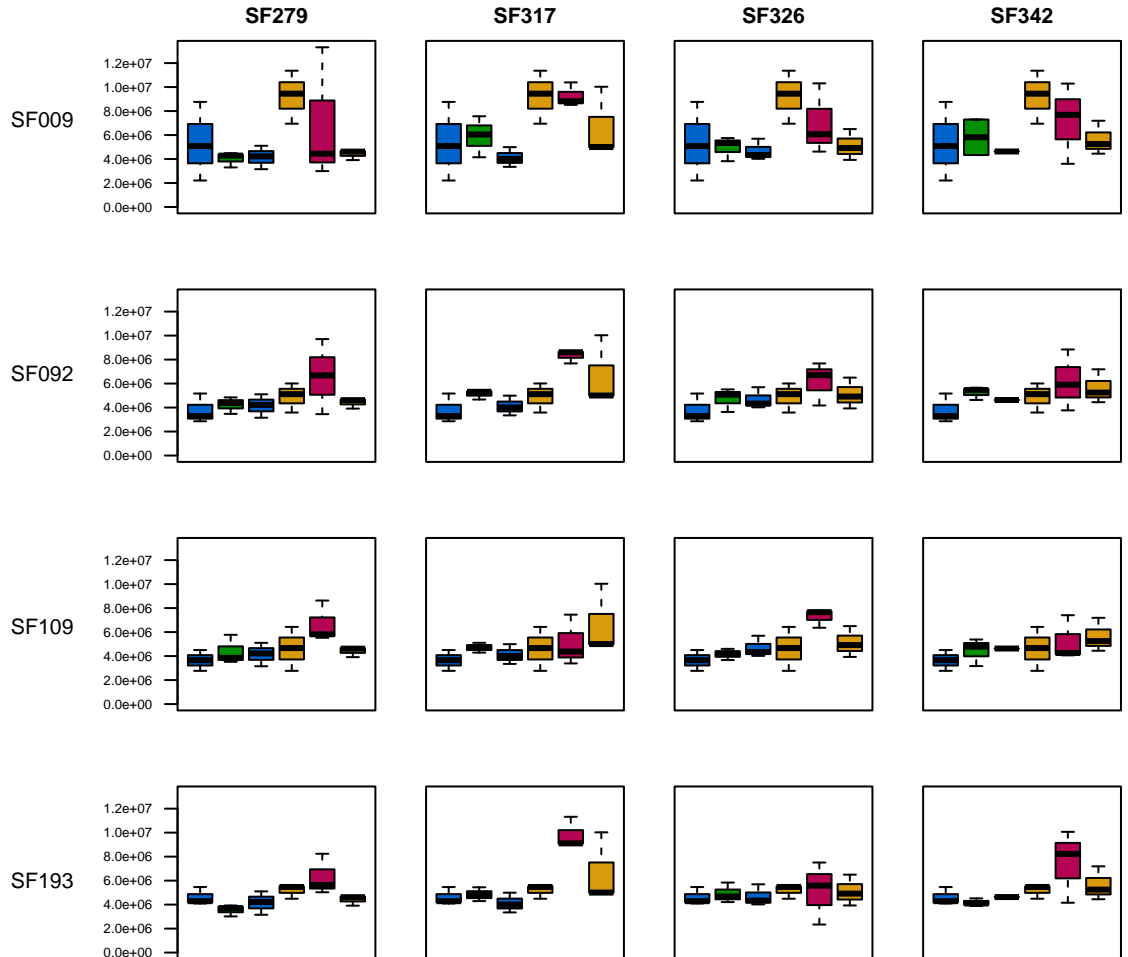

HanXRQChr13g0403971  
 Putative leucine-rich repeat-containing  
 N-terminal, plant-type; Leucine-rich repea

Parents WW  
 Parents WD  
 Hybrids WW  
 Hybrids WD

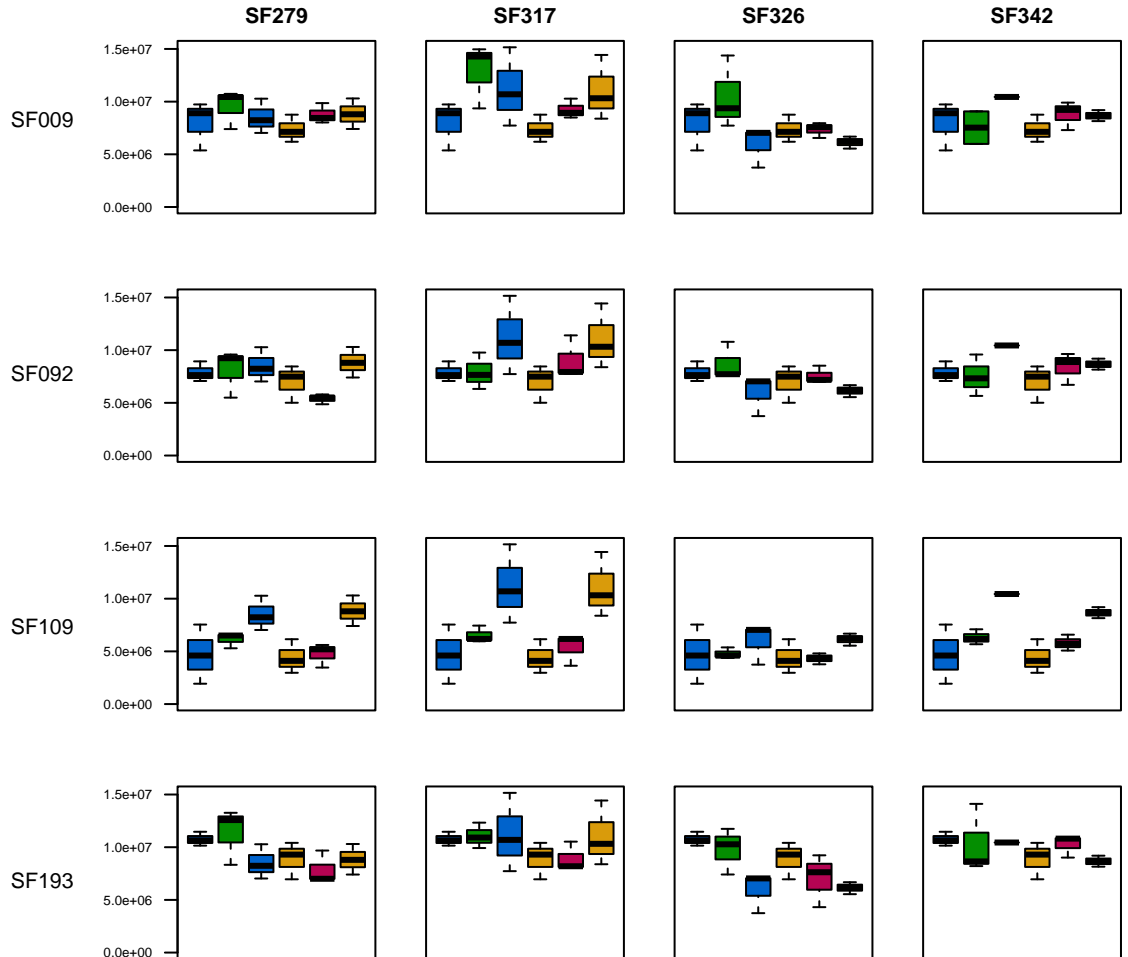

HanXRQChr01g0016601  
Putative FKBP-type peptidyl-prolyl  
cis-trans isomerase domain; Peptidyl-prolyl

Parents WW  
Parents WD  
Hybrids WW  
Hybrids WD

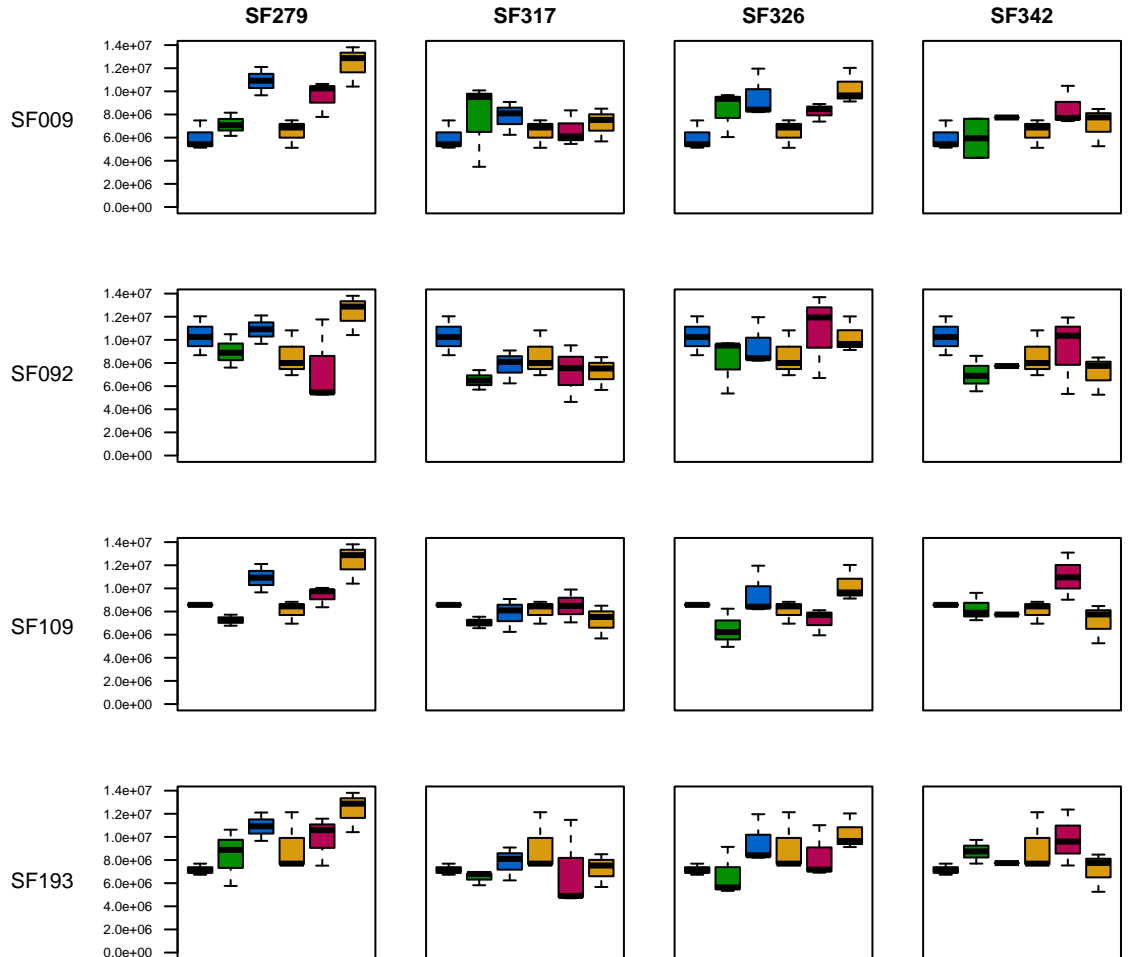

HanXRQChr13g0405801  
Probable mitochondrial substrate  
carrier family protein

Parents WW  
Parents WD  
Hybrids WW  
Hybrids WD

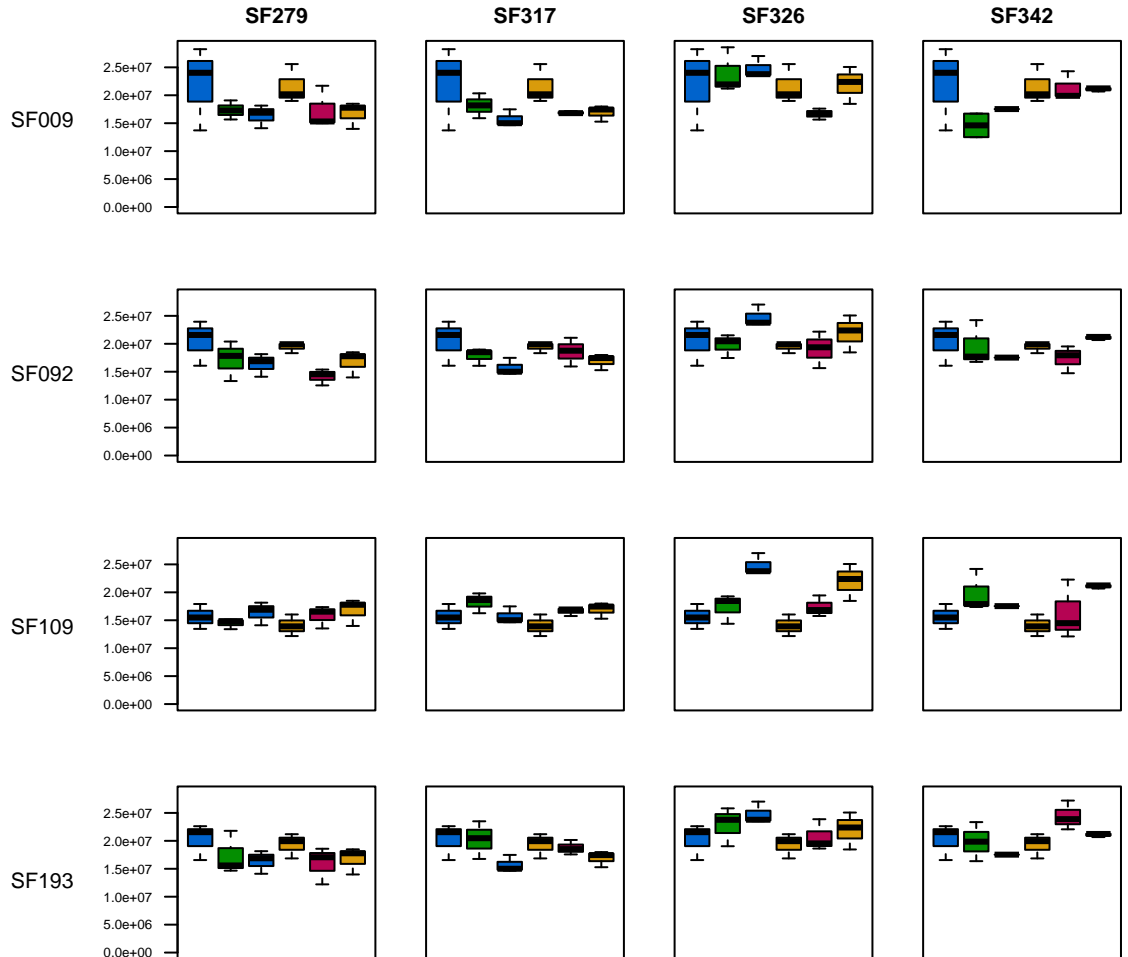

HanXRQChr10g0282491  
 Putative ATPase, F0 complex, subunit C;  
 ATPase, F0 complex, subunit B/B', bacterial

Parents WW  
 Parents WD  
 Hybrids WW  
 Hybrids WD

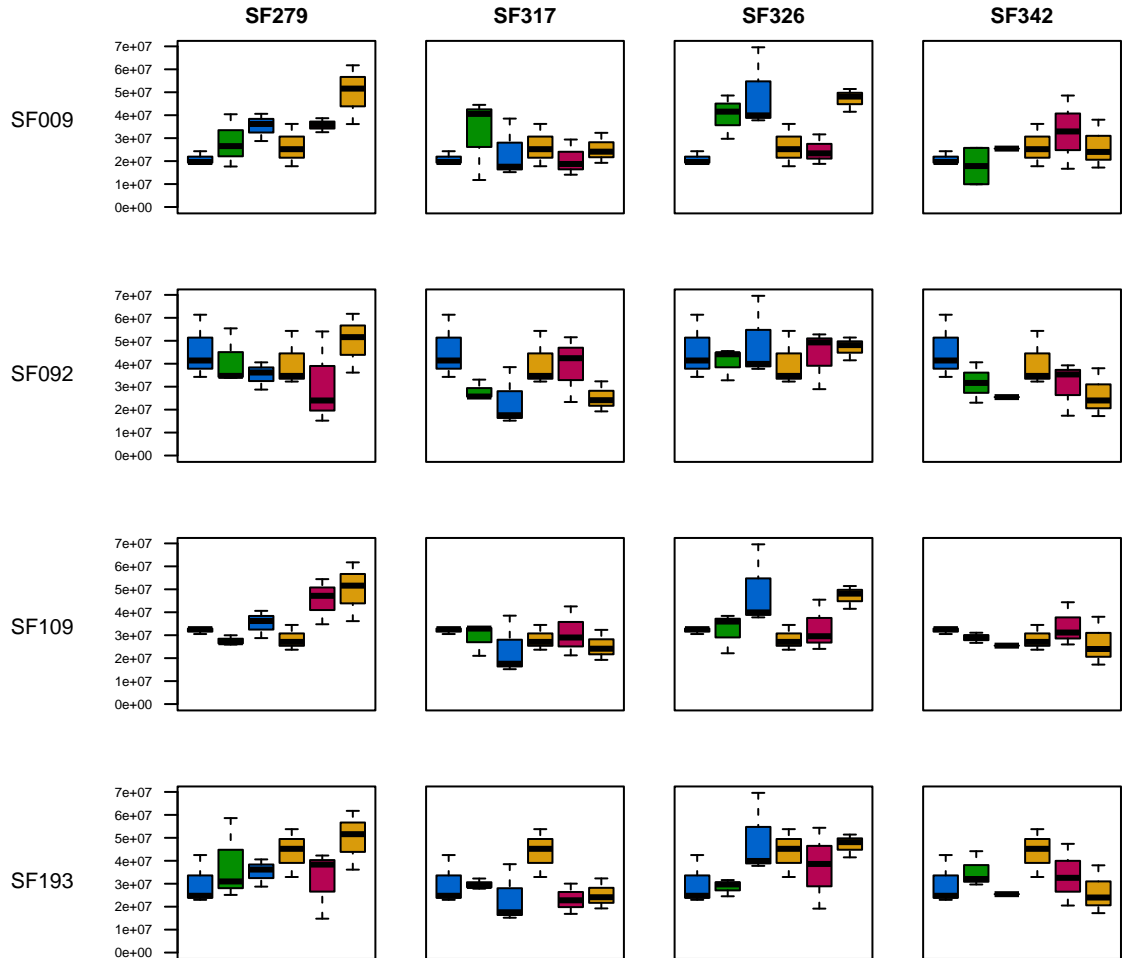

HanXRQChr17g0562991  
Probable carotenoid  
9,10(9',10')-cleavage dioxygenase 1

Parents WW  
Parents WD  
Hybrids WW  
Hybrids WD

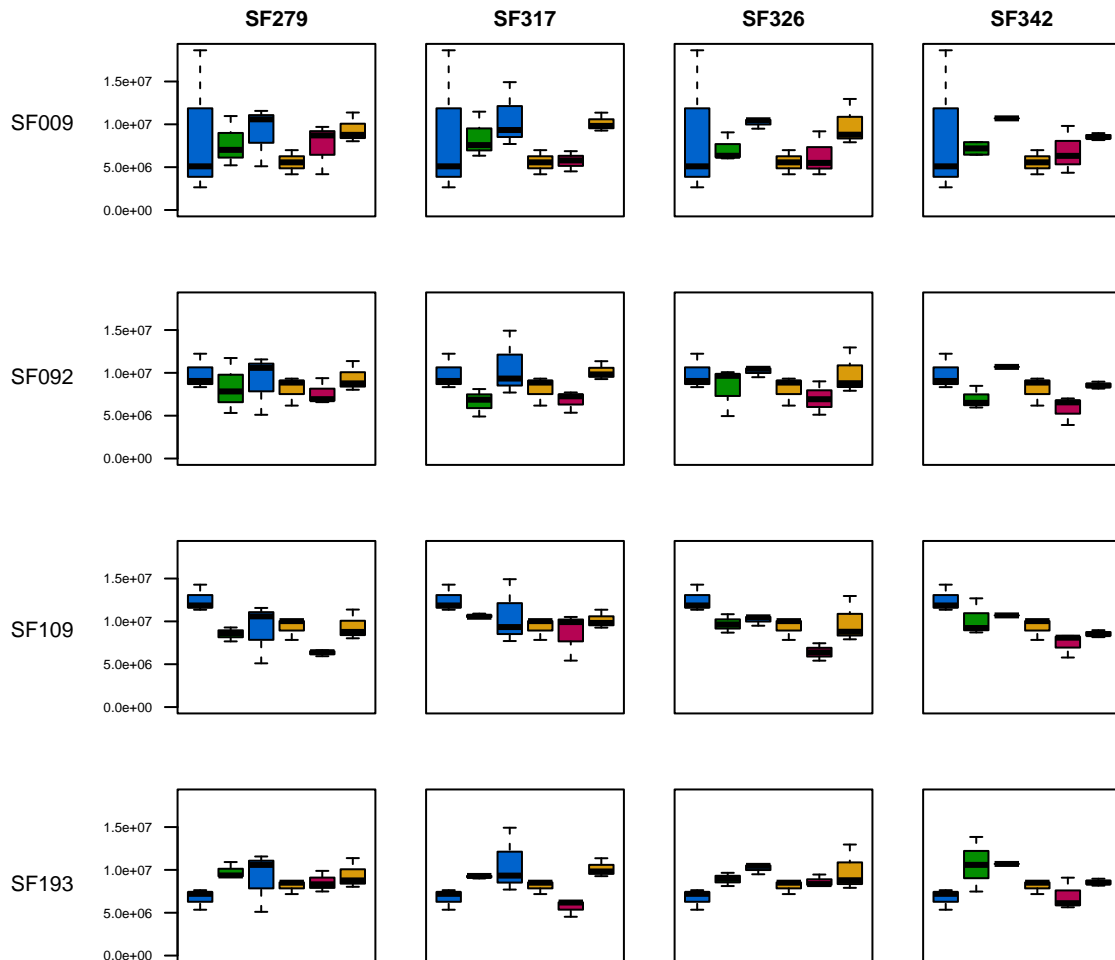

HanXRQChr08g0222021  
Probable  
peptide-N4-(N-acetyl-beta-glucosaminyl)

Parents WW  
Parents WD  
Hybrids WW  
Hybrids WD

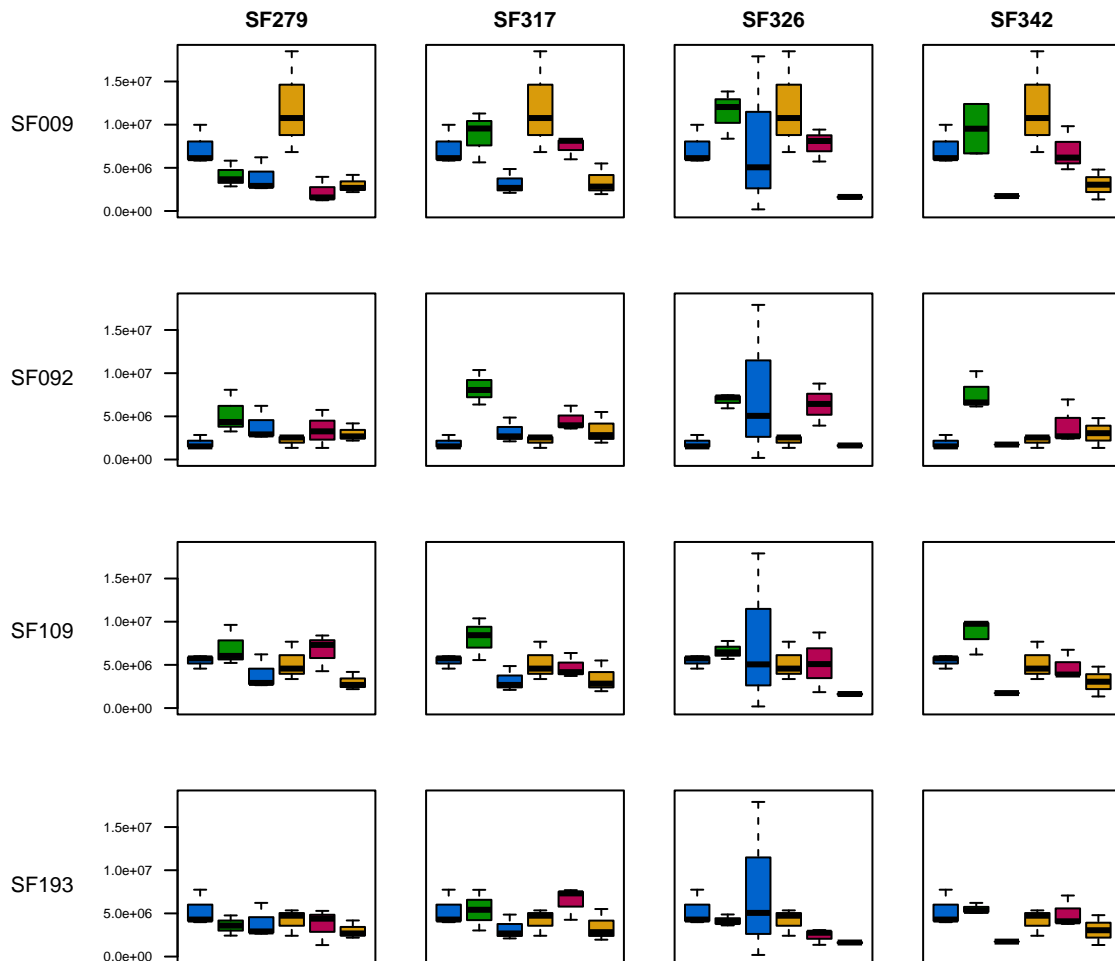

HanXRQChr13g0419741  
Probable non-specific lipid-transfer  
protein

Parents WW  
Parents WD  
Hybrids WW  
Hybrids WD

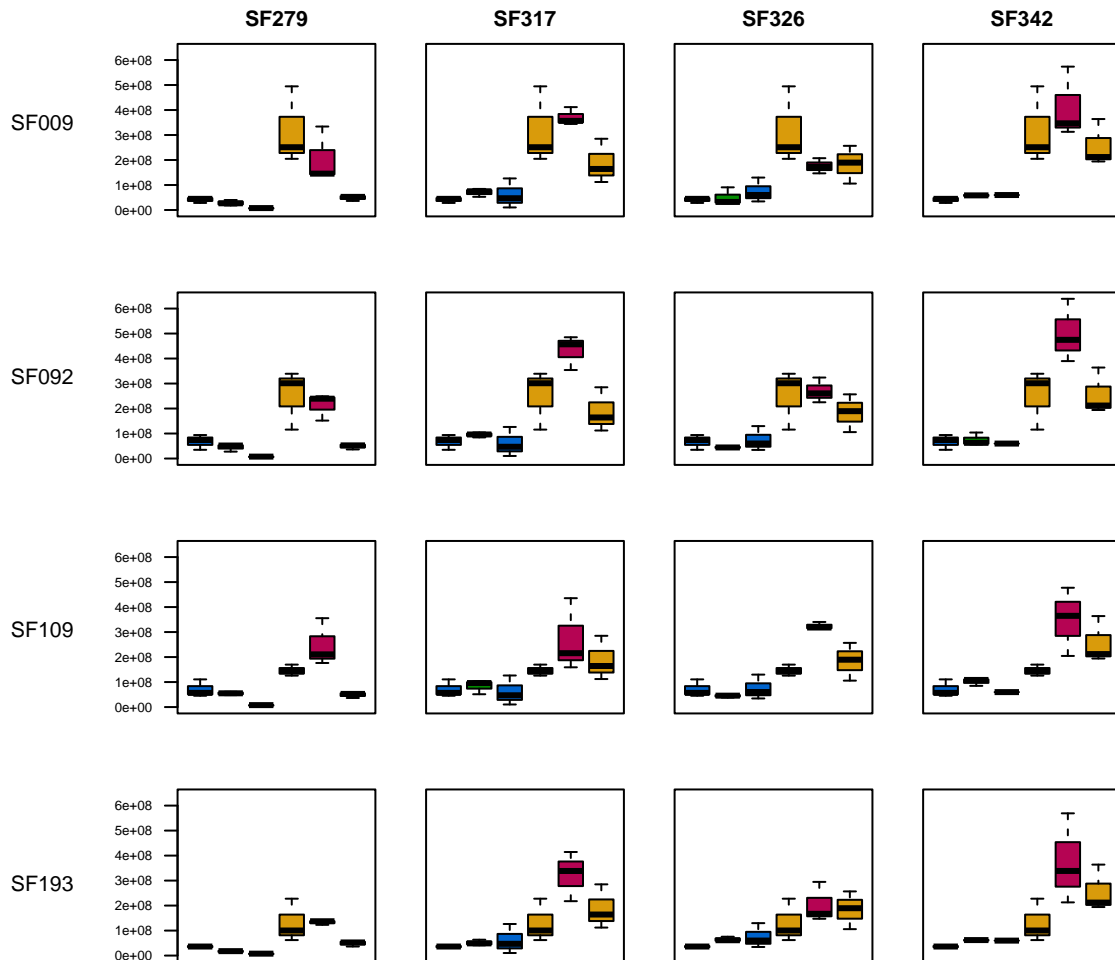



HanXRQChr12g0366161  
 Probable ribose 5-phosphate isomerase,  
 type A protein

Parents WW  
 Parents WD  
 Hybrids WW  
 Hybrids WD

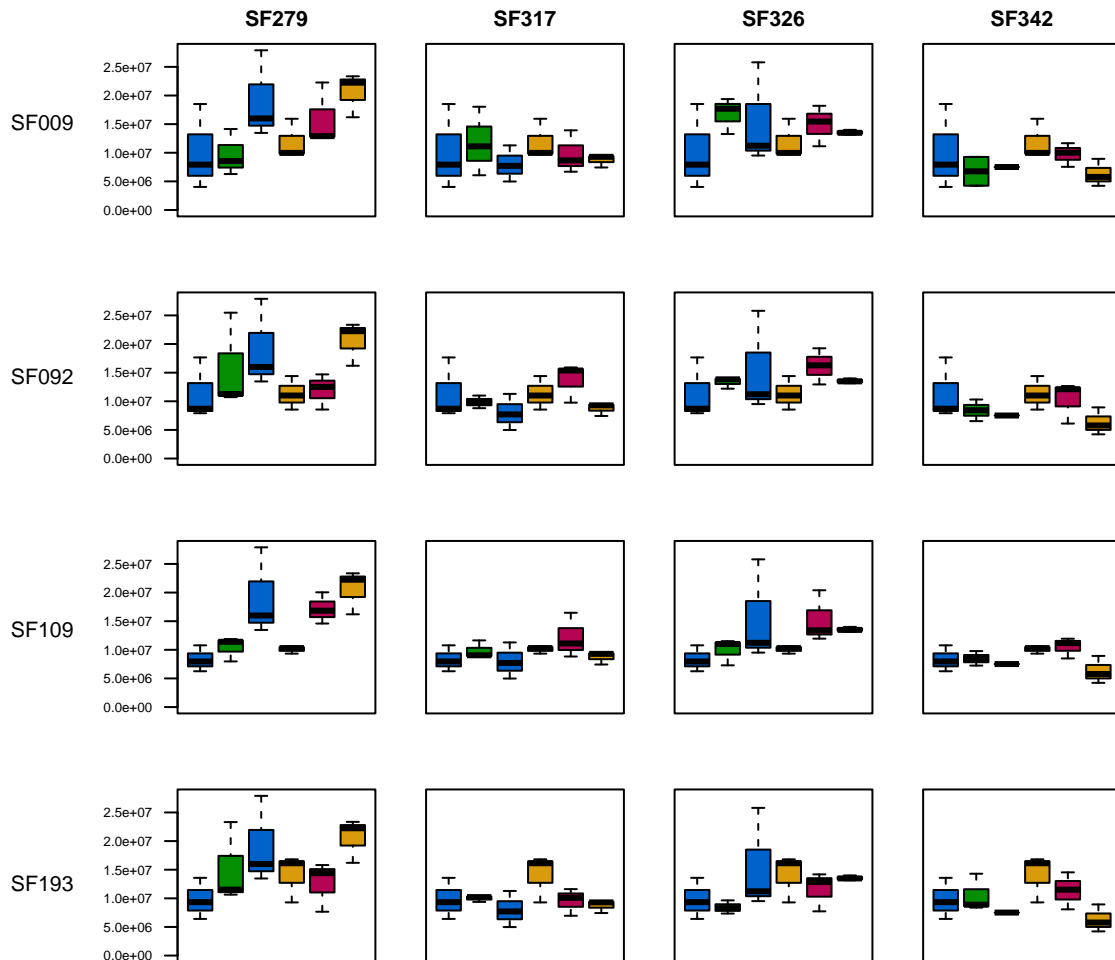

HanXRQChr13g0417841  
Putative hydrolyase LeuD/HacB/DmdB;  
Aconitase/isopropylmalate dehydratase

Parents WW  
Parents WD  
Hybrids WW  
Hybrids WD

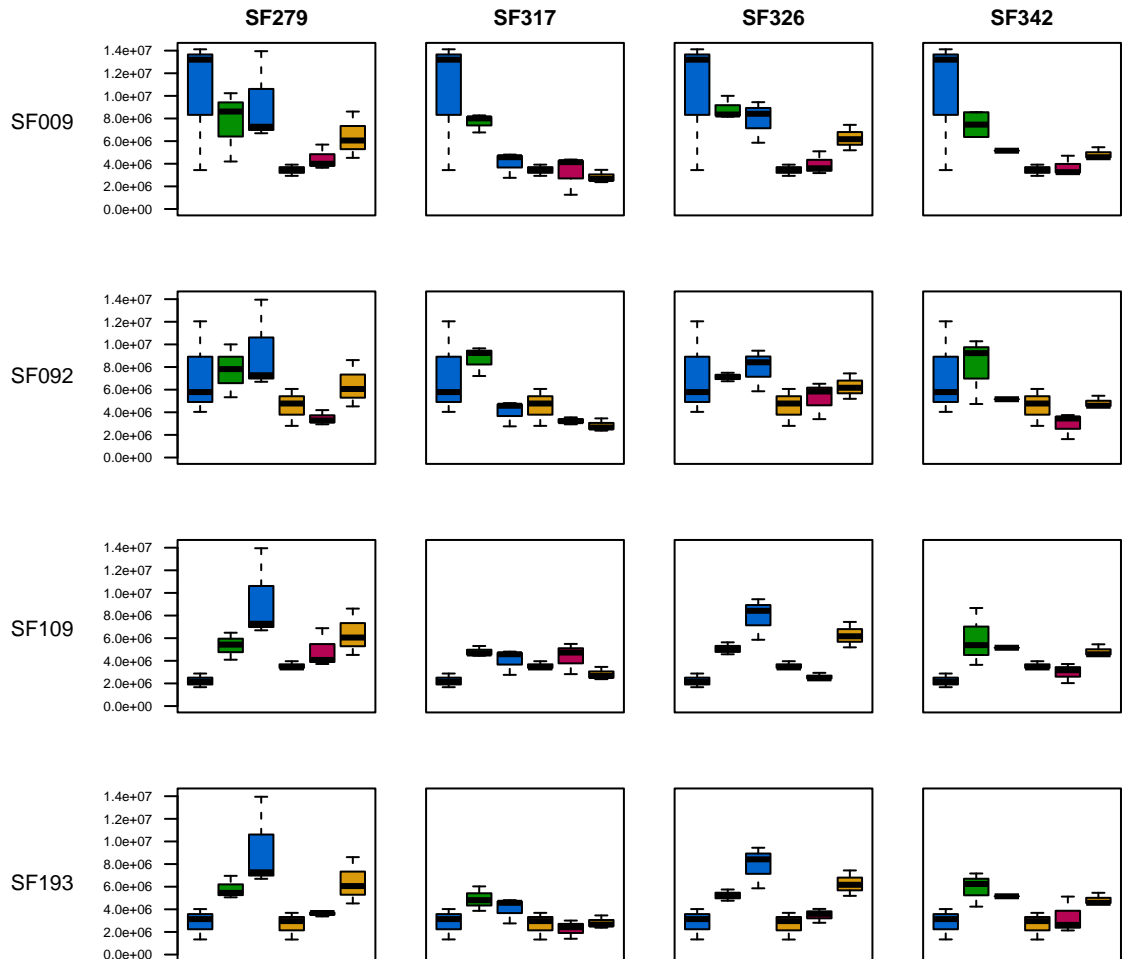

HanXRQChr04g0117931  
 Probable SPFH/Band 7/PHB  
 domain-containing membrane-associated

Parents WW  
 Parents WD  
 Hybrids WW  
 Hybrids WD

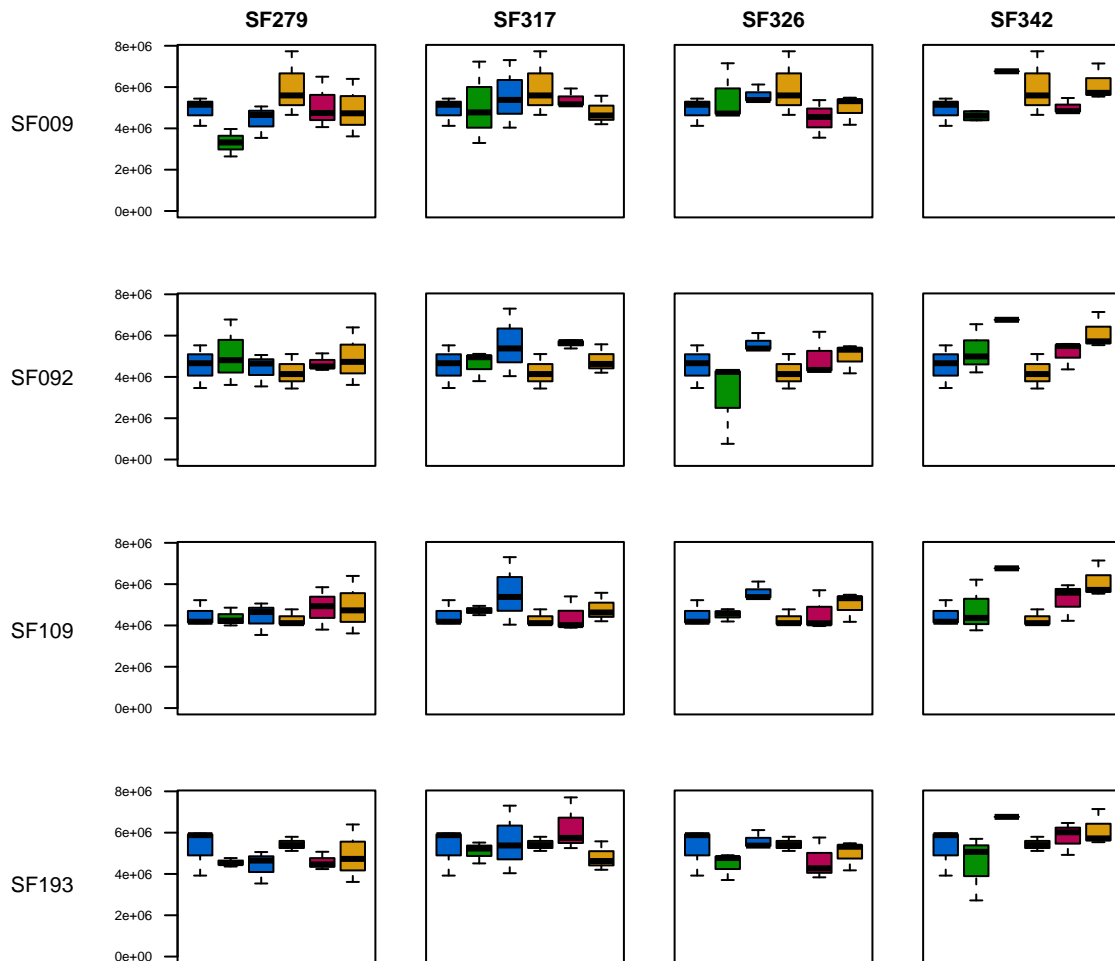

HanXRQChr14g0440331  
 Probable pfkB-like carbohydrate kinase  
 family protein

Parents WW  
 Parents WD  
 Hybrids WW  
 Hybrids WD

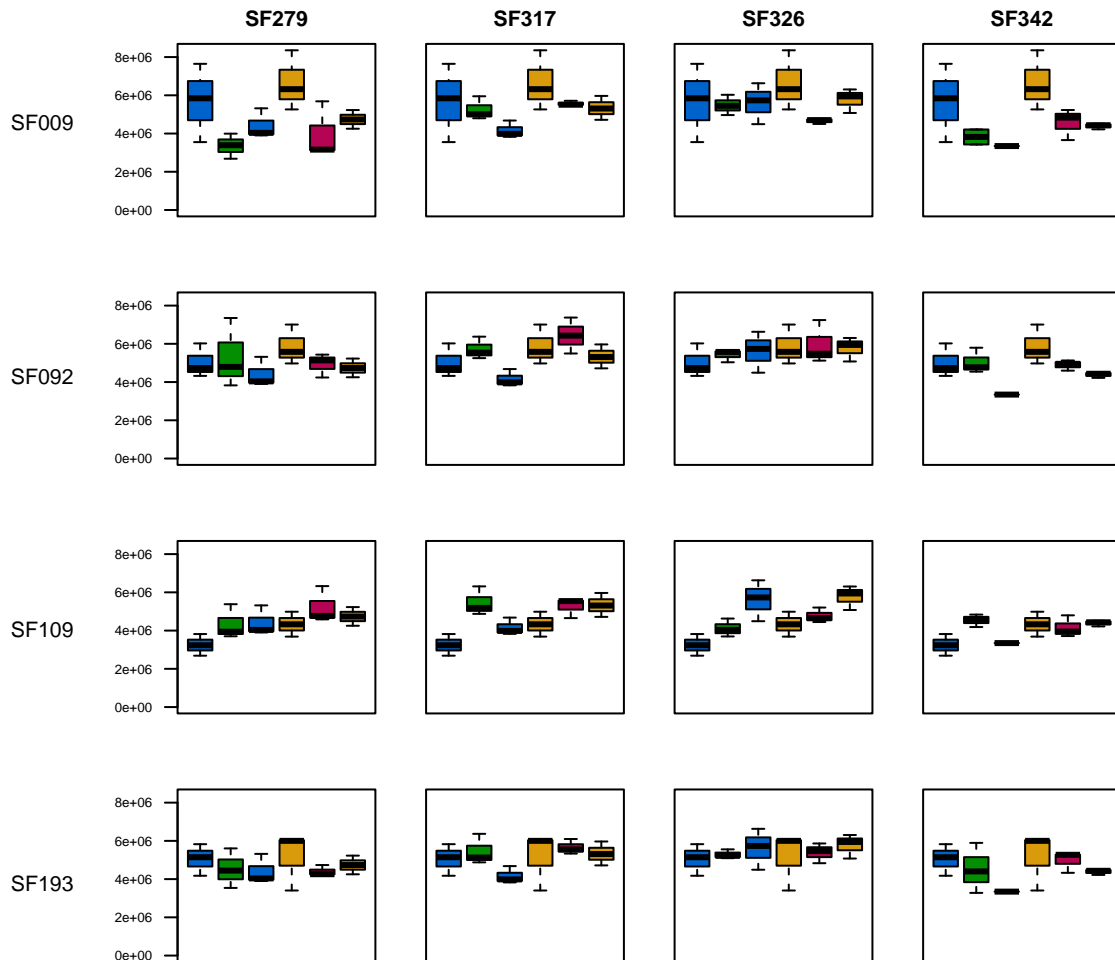

HanXRQChr09g0257641  
Putative glyoxalase/Bleomycin  
resistance protein/Dihydroxybiphenyl dioxyg

Parents WW  
Parents WD  
Hybrids WW  
Hybrids WD

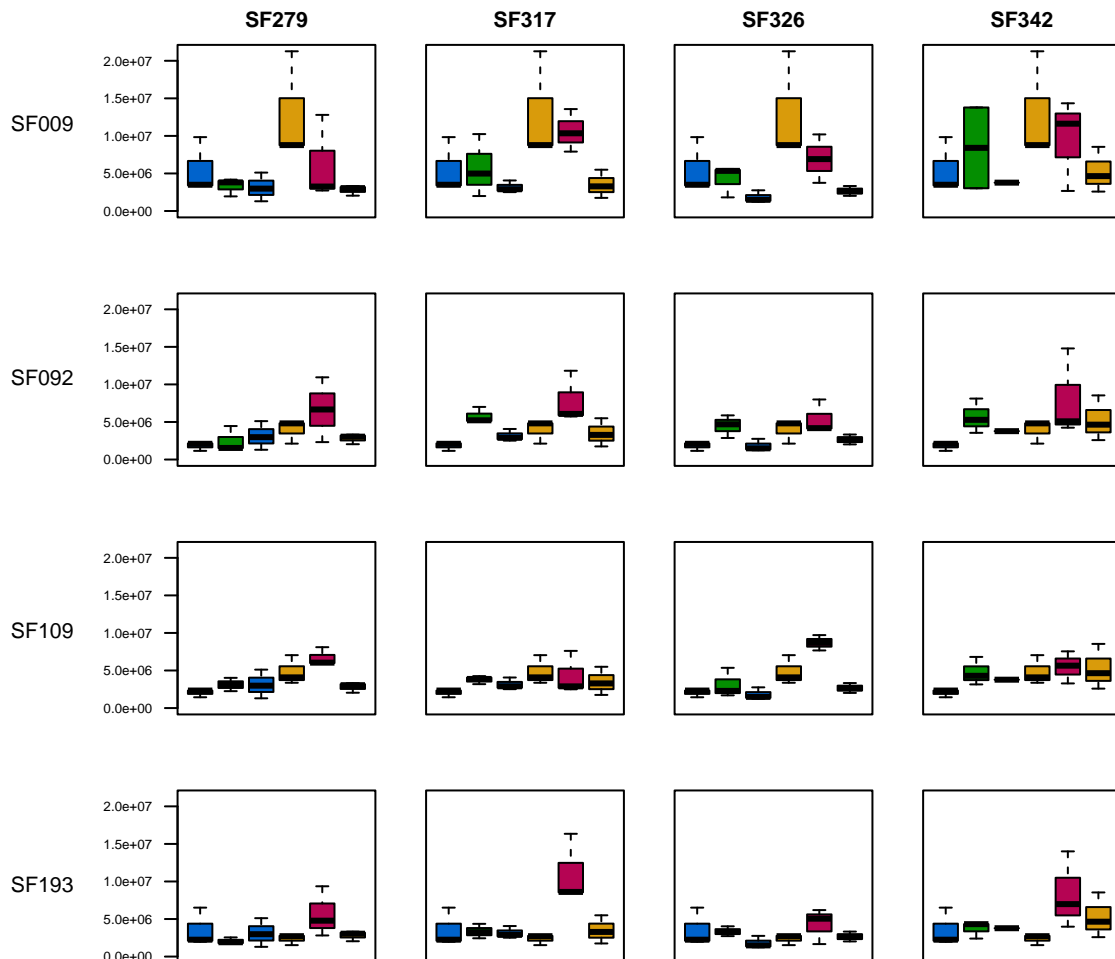

HanXRQChr01g0009541  
Probable proteasome subunit alpha type-3

Parents WW  
Parents WD  
Hybrids WW  
Hybrids WD

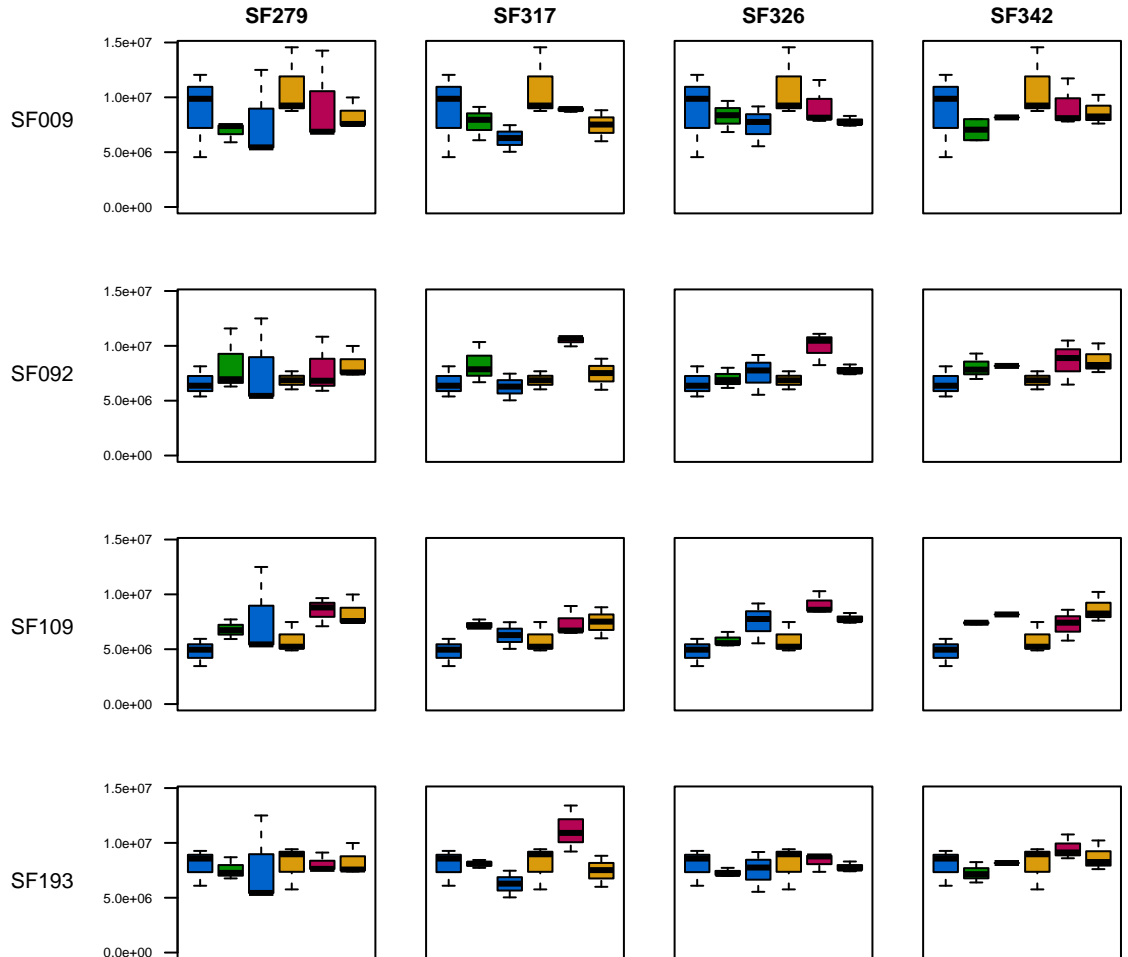

HanXRQChr05g0130491  
Probable alpha-L-arabinofuranosidase 1

Parents WW  
Parents WD  
Hybrids WW  
Hybrids WD

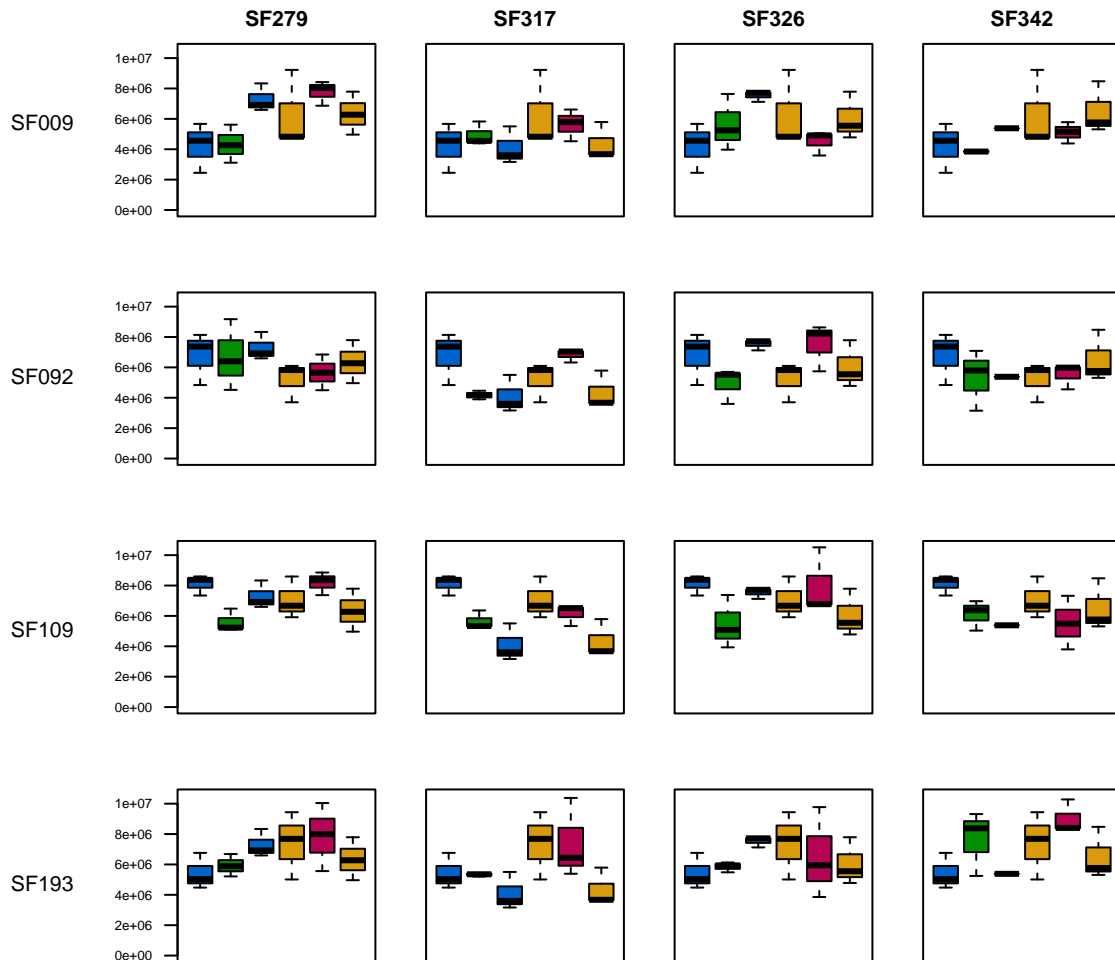

HanXRQChr13g0401231  
Putative RNA-binding motif protein 8;  
Nucleotide-binding alpha-beta plait domain

Parents WW  
Parents WD  
Hybrids WW  
Hybrids WD

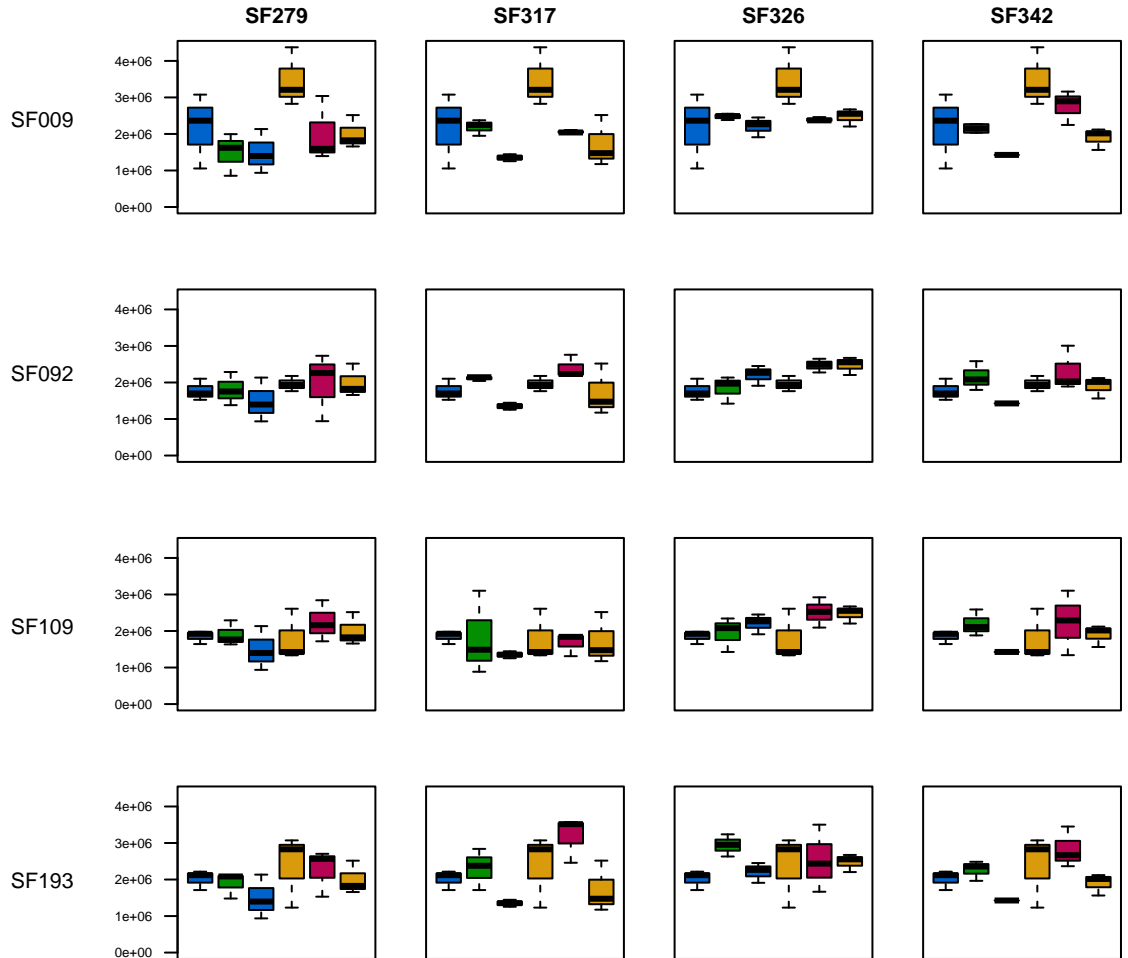



HanXRQChr07g0201181  
Probable histidinol dehydrogenase,  
chloroplastic

Parents WW  
Parents WD  
Hybrids WW  
Hybrids WD

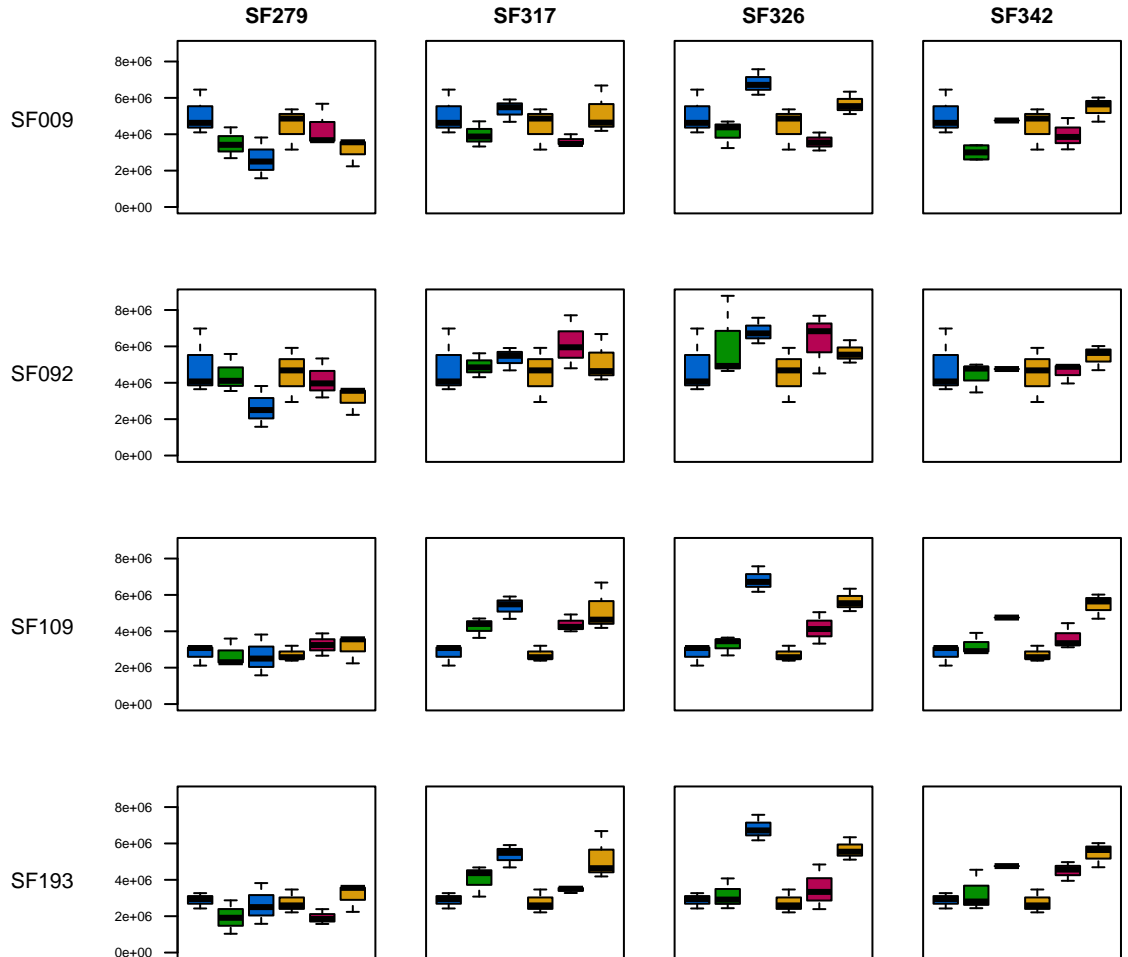

HanXRQChr07g0197421  
Probable elongation factor 1- $\alpha$

Parents WW  
Parents WD  
Hybrids WW  
Hybrids WD

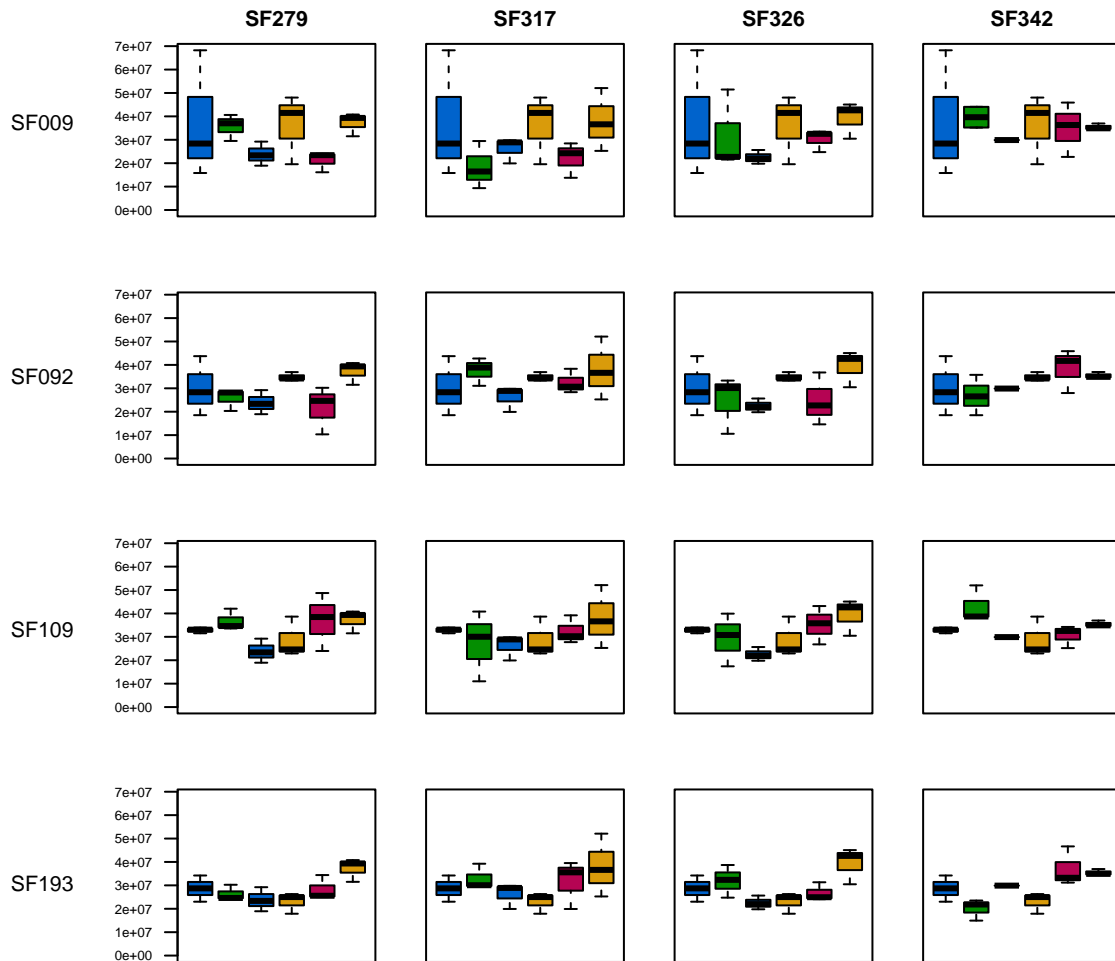

HanXRQChr00c0313g0573421  
 Putative photosynthetic reaction  
 centre, L/M; Photosystem antenna protein--

Parents WW  
 Parents WD  
 Hybrids WW  
 Hybrids WD

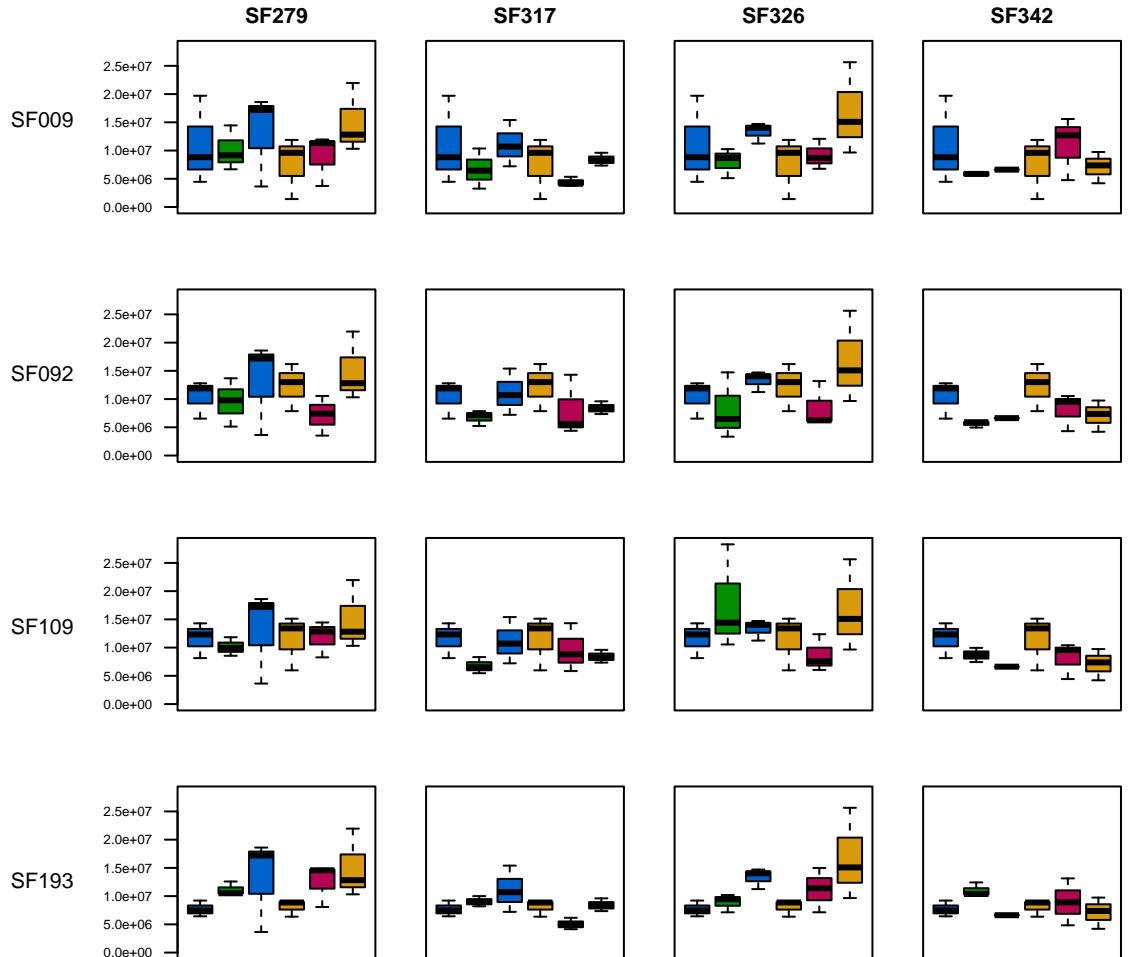

HanXRQChr14g0454811  
Putative S-adenosylmethionine synthetase

- Parents WW
- Parents WD
- Hybrids WW
- Hybrids WD

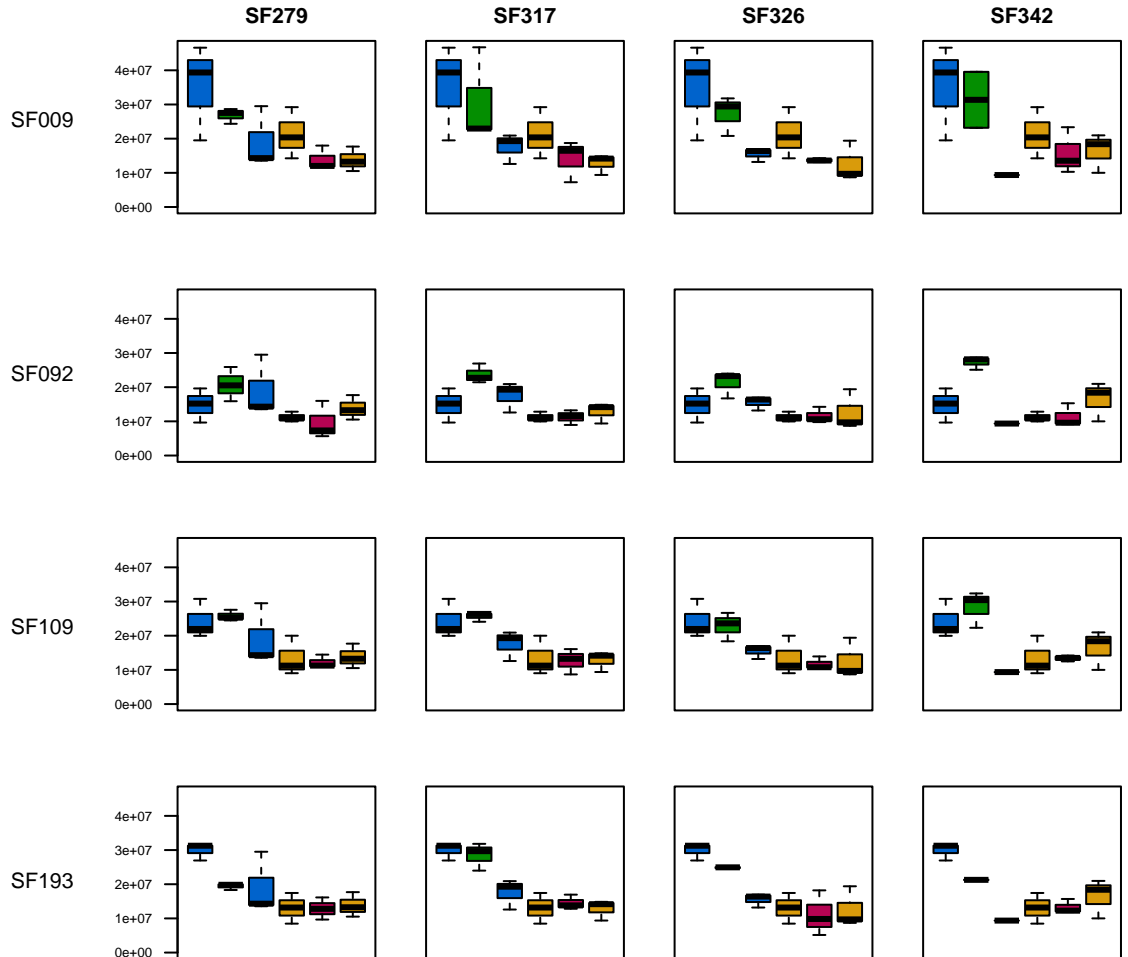

HanXRQChr10g0291901  
Putative universal stress protein A

Parents WW  
Parents WD  
Hybrids WW  
Hybrids WD

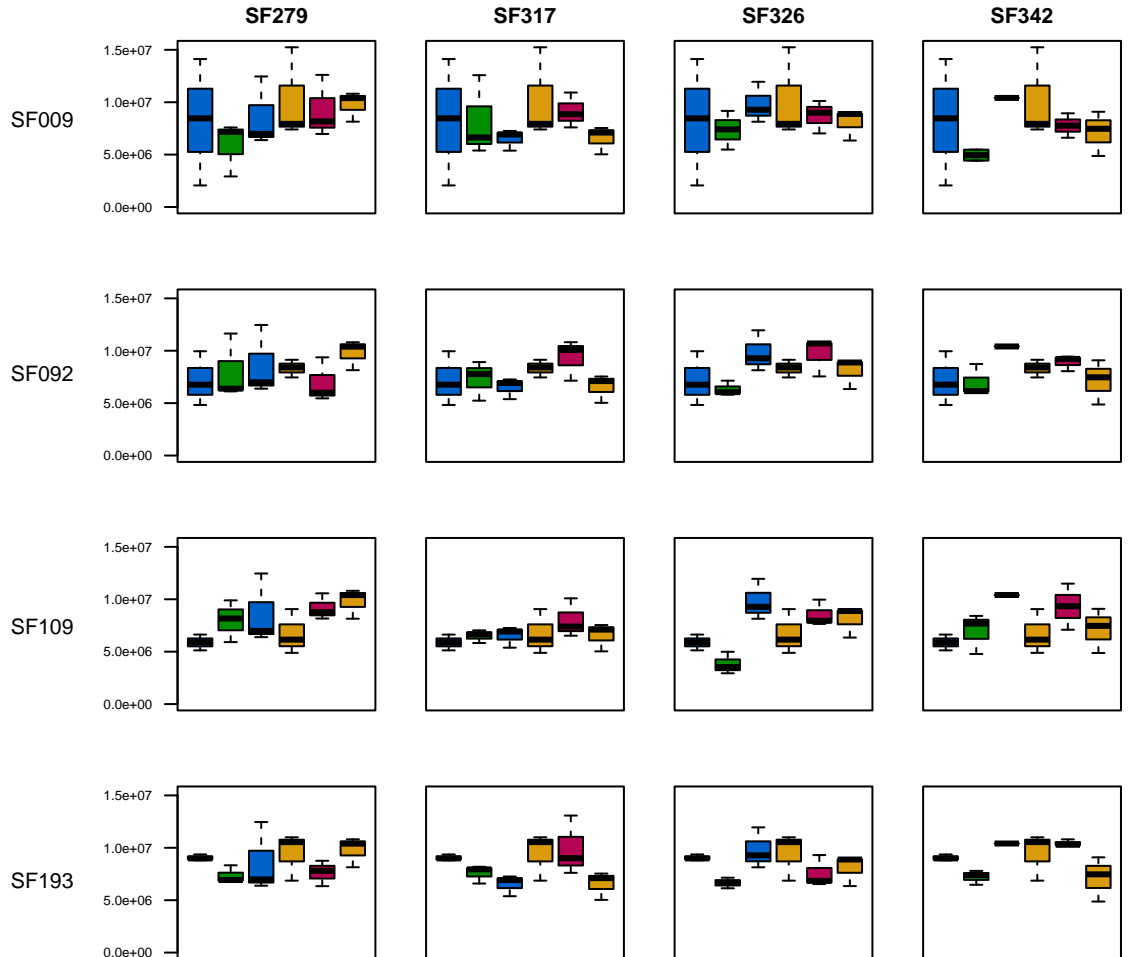

HanXRQChr11g0320251  
Probable one-helix protein 2

Parents WW  
Parents WD  
Hybrids WW  
Hybrids WD

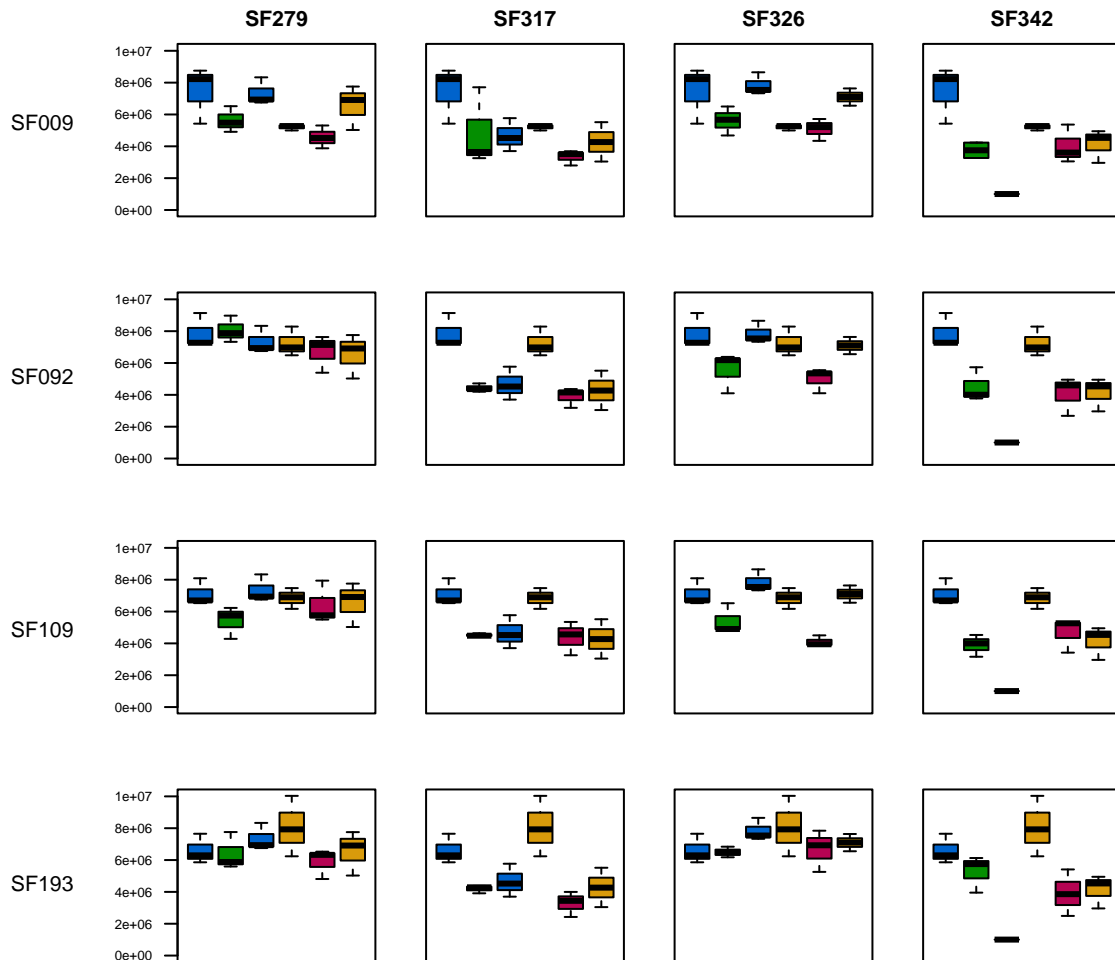

HanXRQChr15g0466671  
Putative NAD(P)-binding domain

- Parents WW
- Parents WD
- Hybrids WW
- Hybrids WD

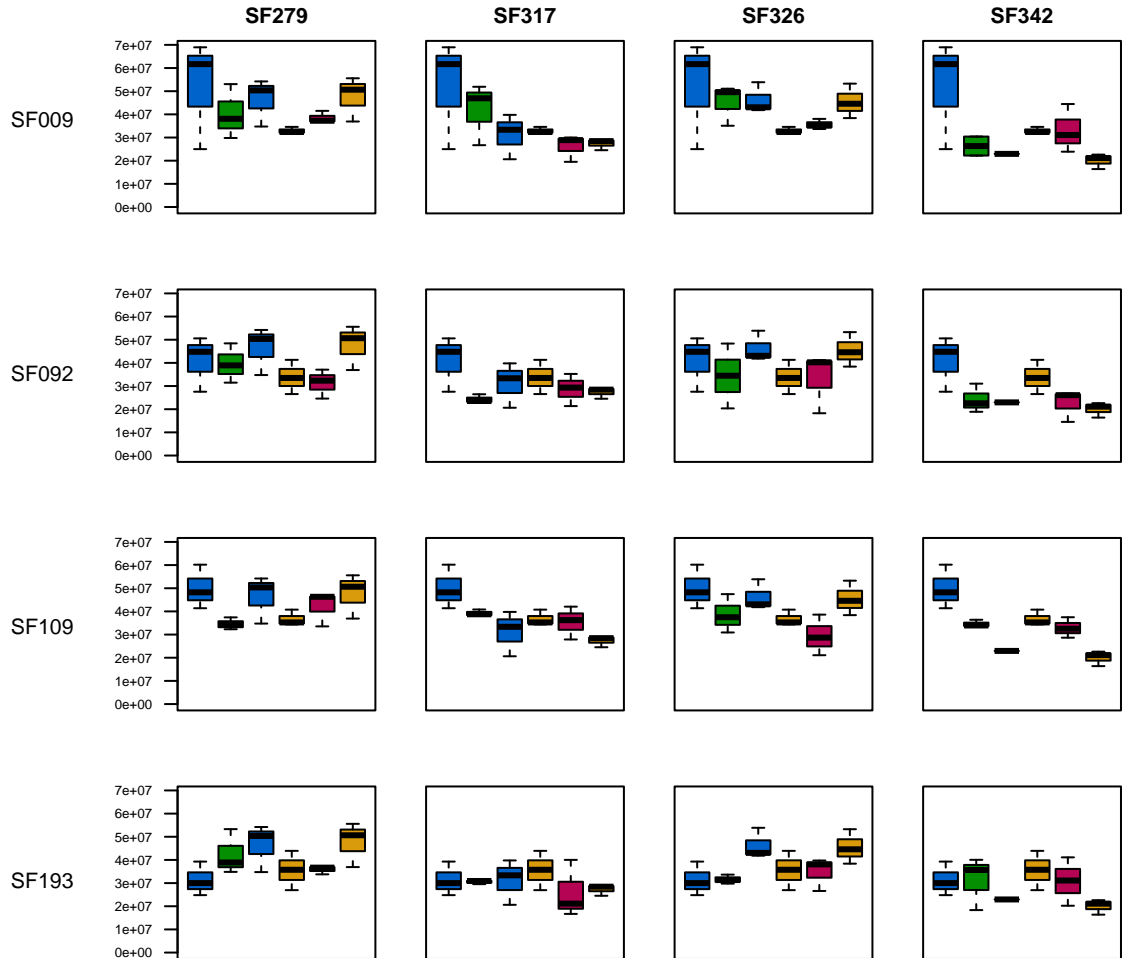

HanXRQChr12g0376591  
Putative alcohol dehydrogenase  
superfamily, zinc-type; NAD(P)-binding do

Parents WW  
Parents WD  
Hybrids WW  
Hybrids WD

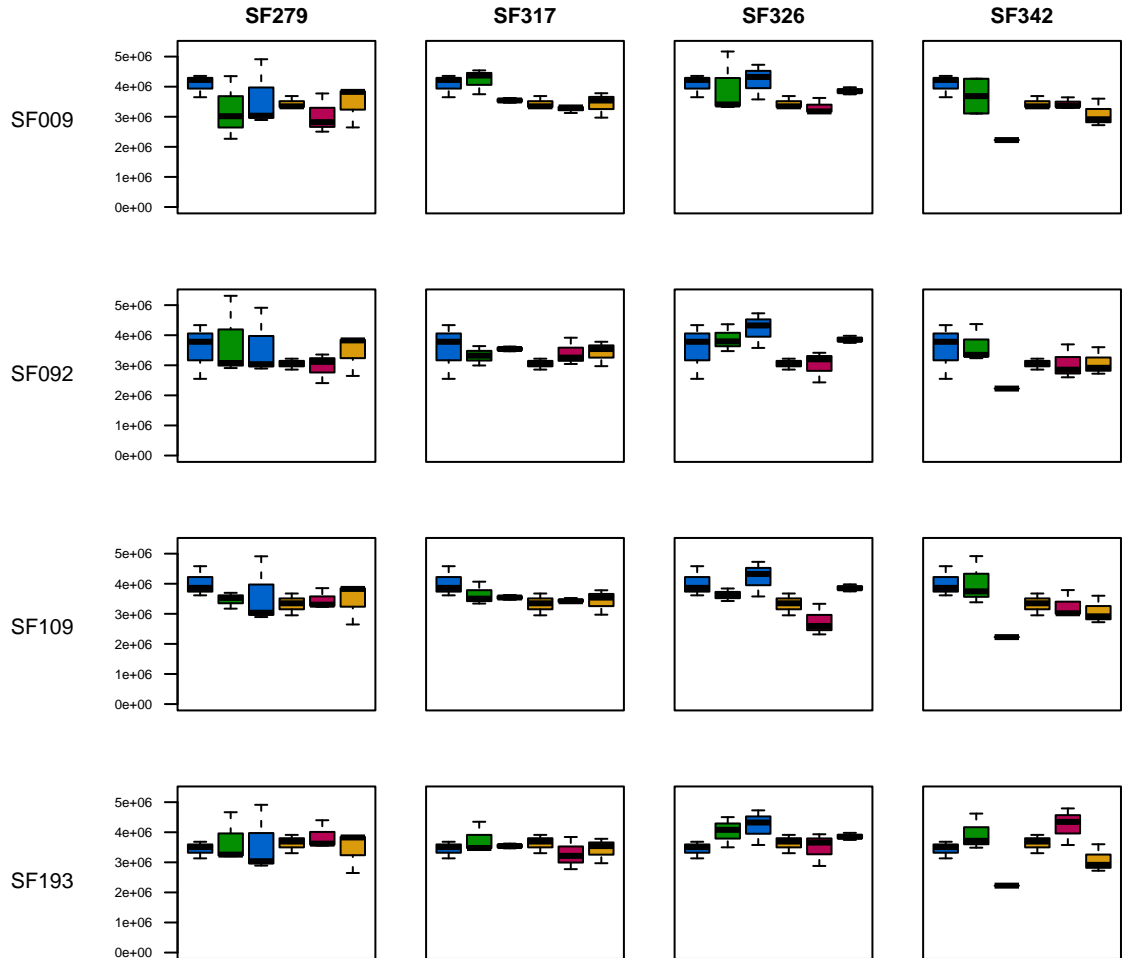



HanXRQChr10g0319651  
Probable stress responsive alpha-beta  
barrel domain protein

Parents WW  
Parents WD  
Hybrids WW  
Hybrids WD

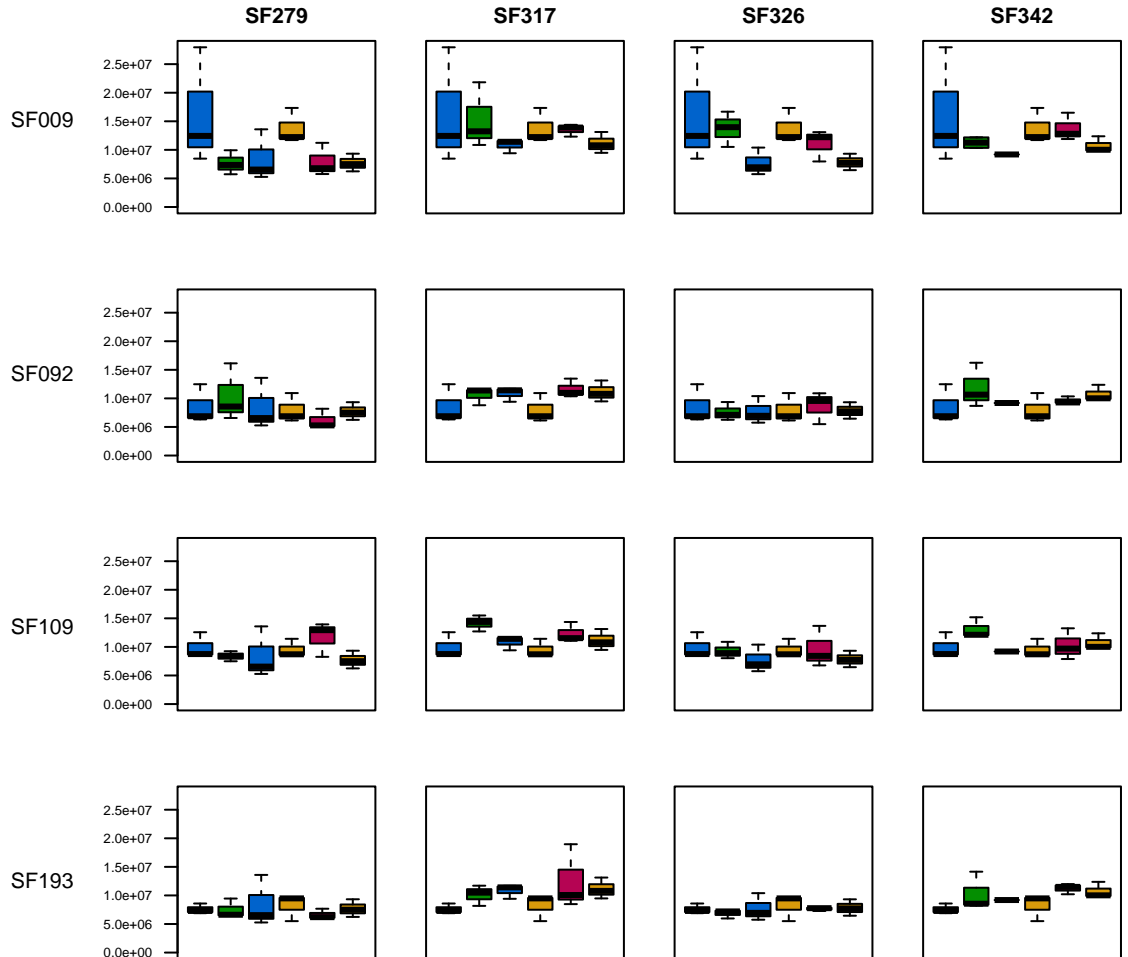

HanXRQChr10g0301801  
Putative RNA recognition motif domain,  
eukaryote; Polyadenylate binding protein, h

Parents WW  
Parents WD  
Hybrids WW  
Hybrids WD

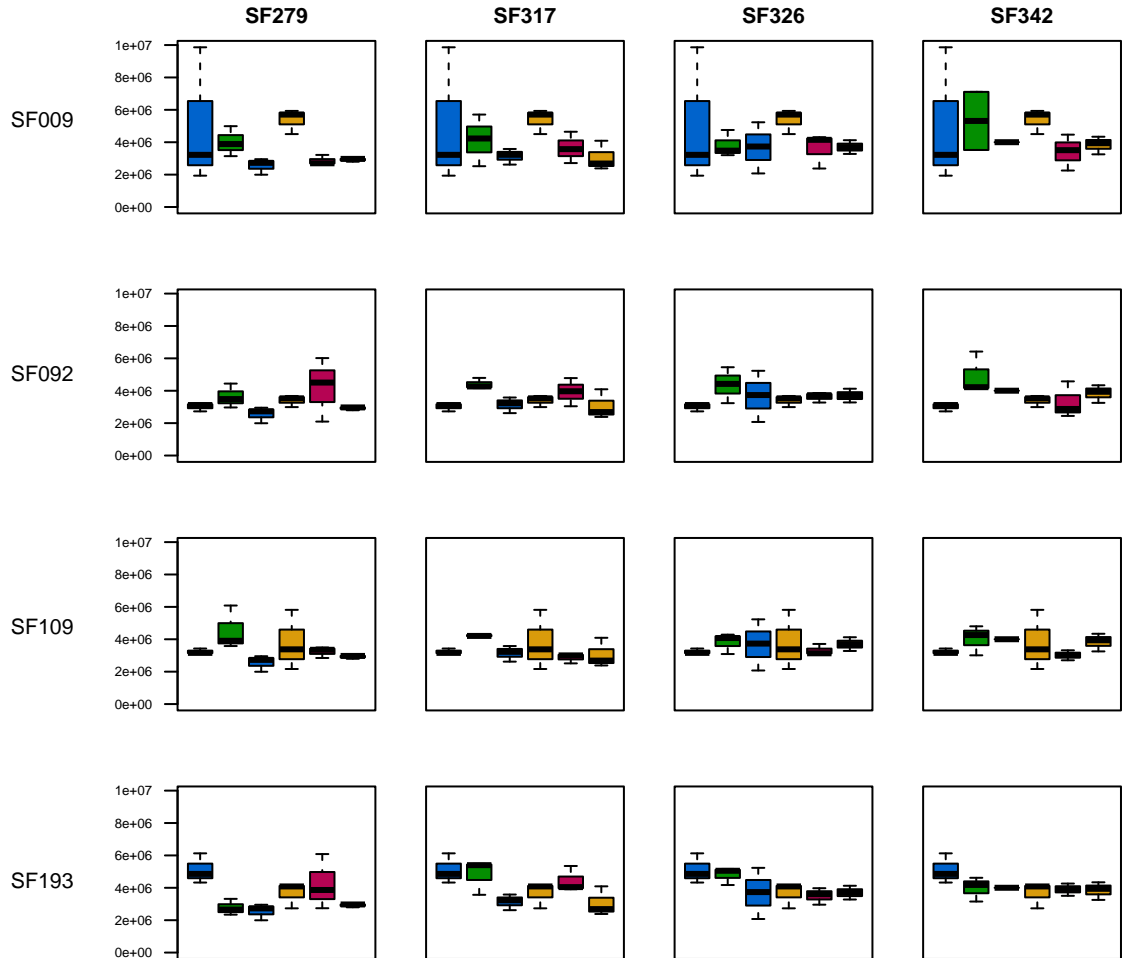

HanXRQCPg0580191  
Putative ribosomal protein S8

Parents WW  
Parents WD  
Hybrids WW  
Hybrids WD

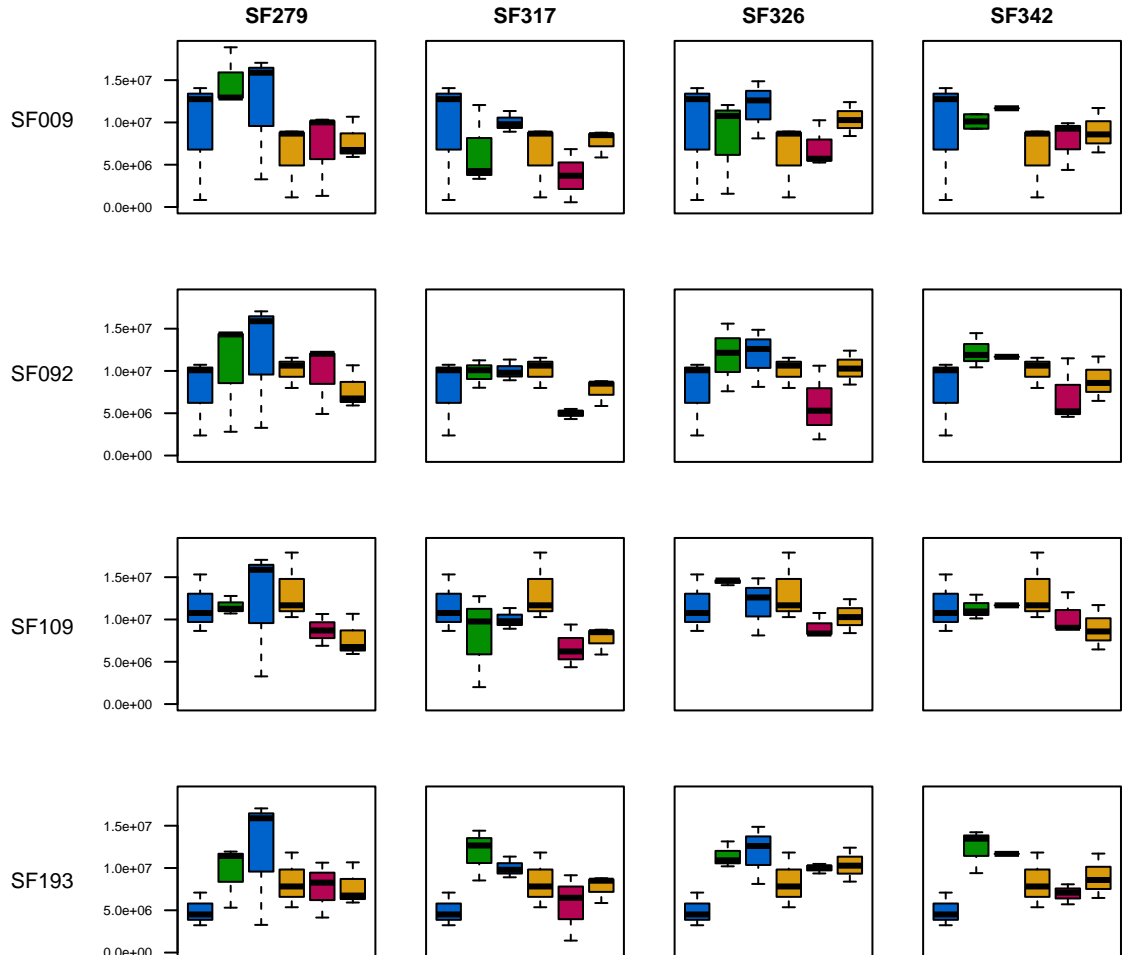

HanXRQChr09g0253381  
Probable ribosomal protein S5 family  
protein

Parents WW  
Parents WD  
Hybrids WW  
Hybrids WD

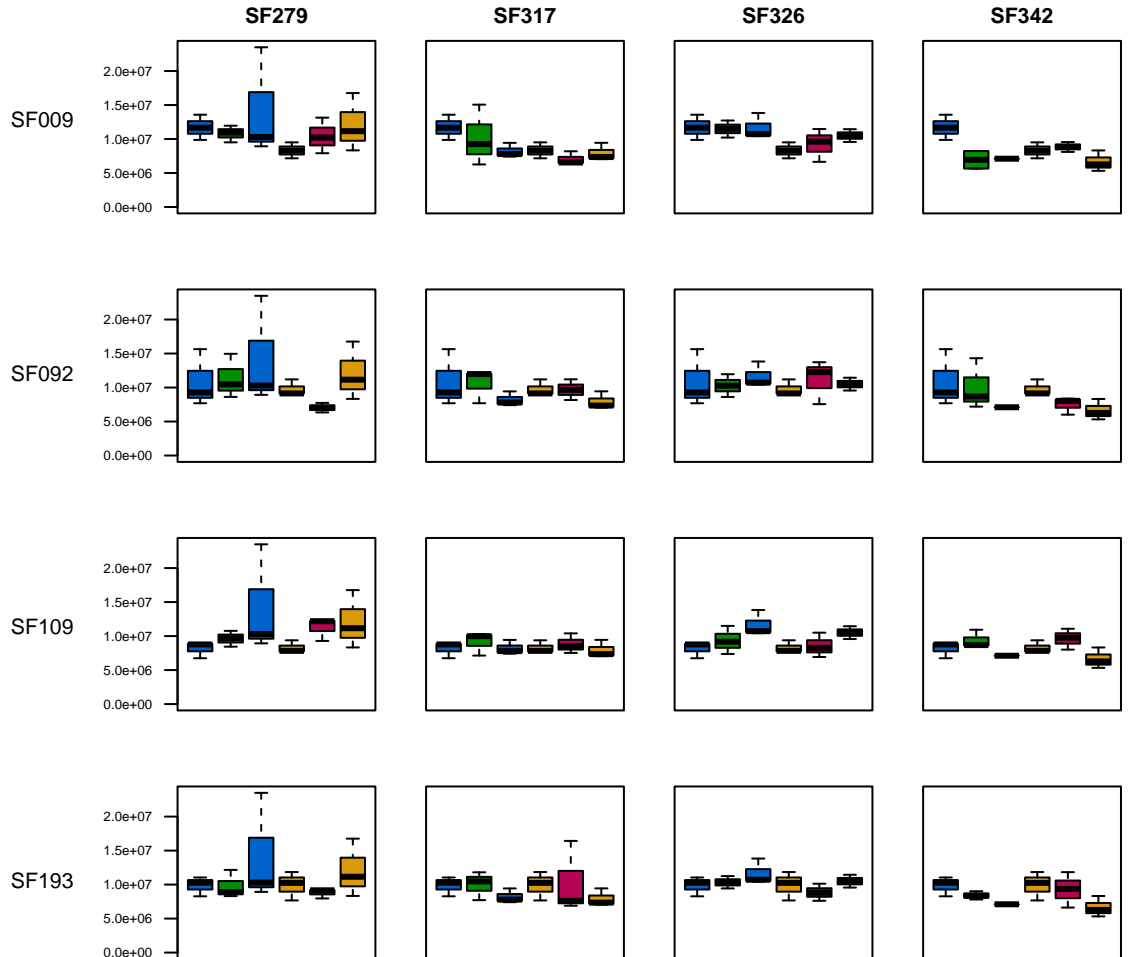

HanXRQChr12g0380701  
Putative ribosomal protein S4/S9,  
N-terminal; Ribosomal protein S4/S9, euka

Parents WW  
Parents WD  
Hybrids WW  
Hybrids WD

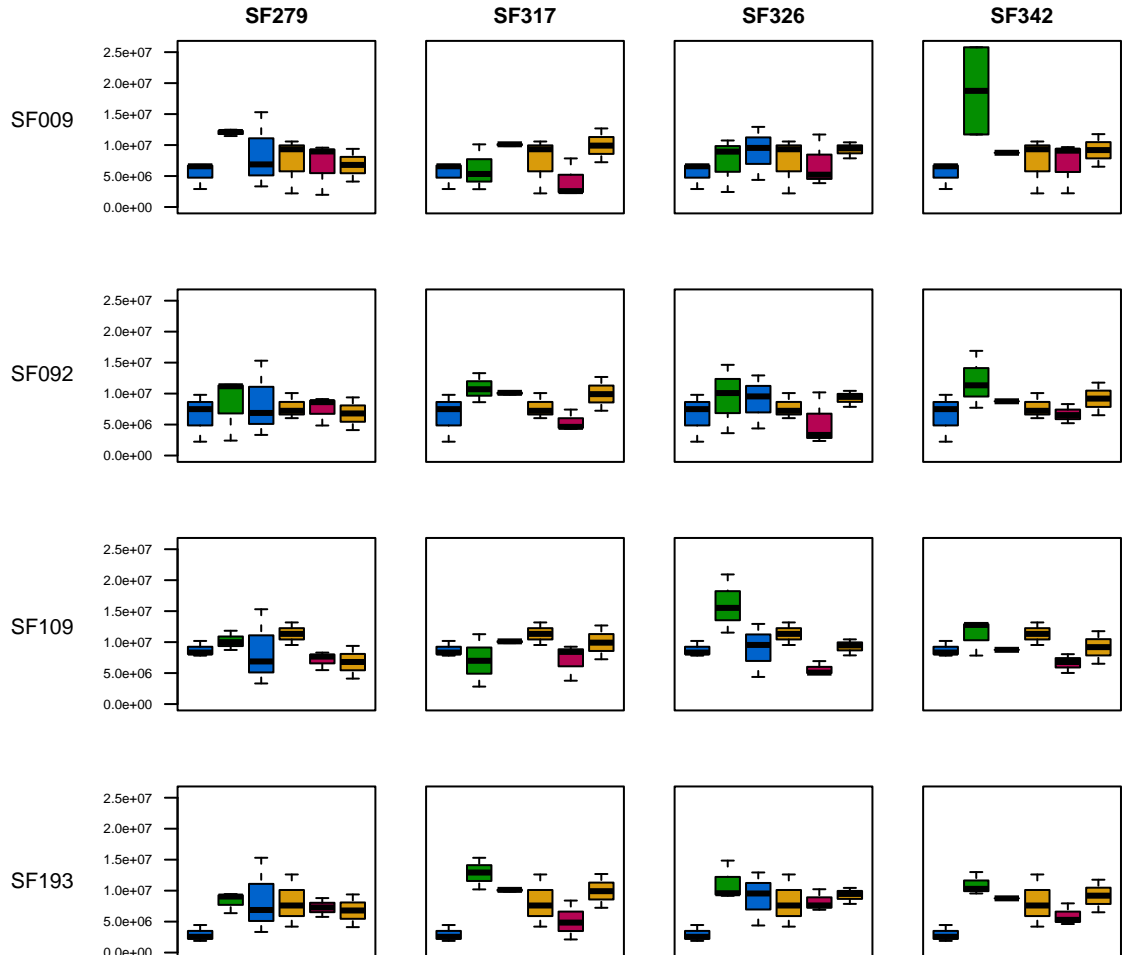

HanXRQChr16g0505631  
Putative nucleotide-binding alpha-beta  
plait domain

Parents WW  
Parents WD  
Hybrids WW  
Hybrids WD

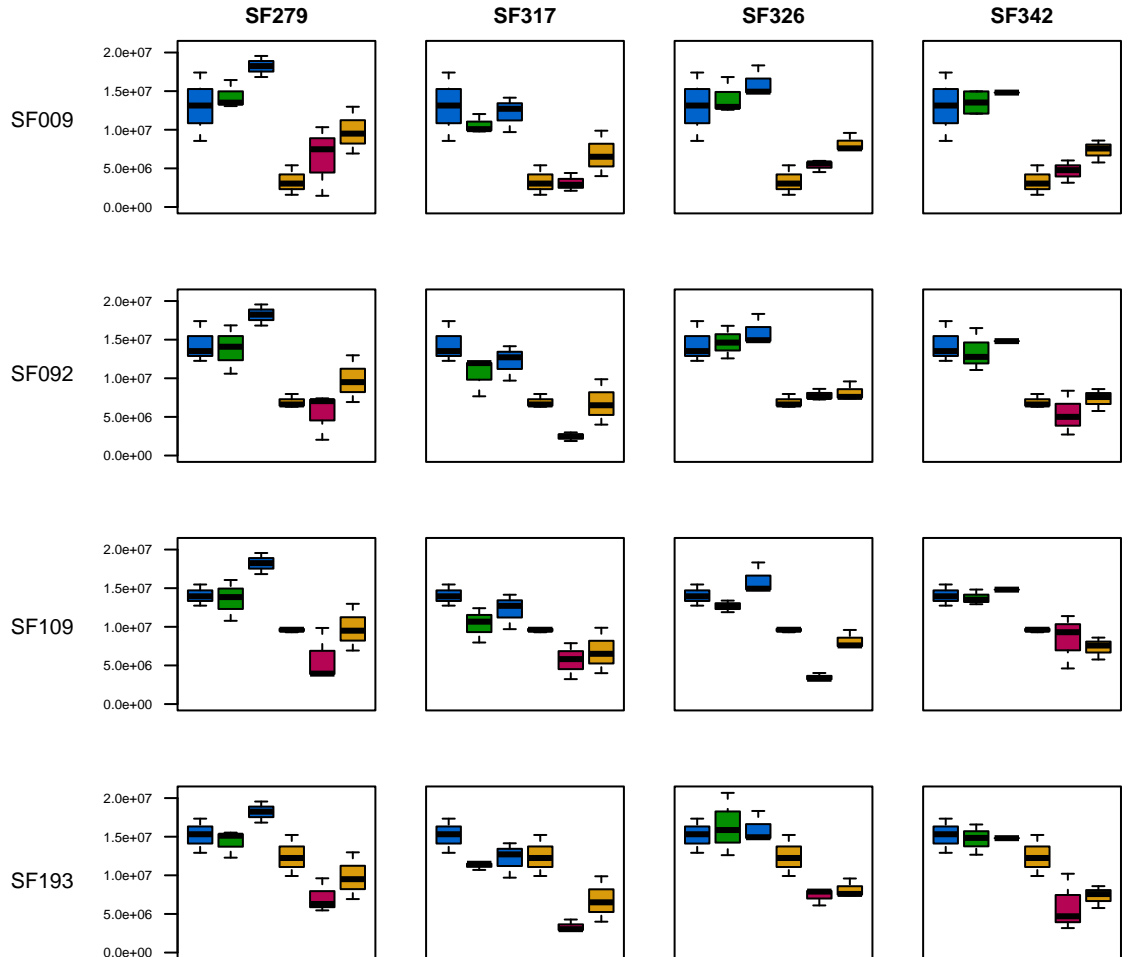

HanXRQChr03g0065301  
Probable domain of unknown function  
(DUF26)

Parents WW  
Parents WD  
Hybrids WW  
Hybrids WD

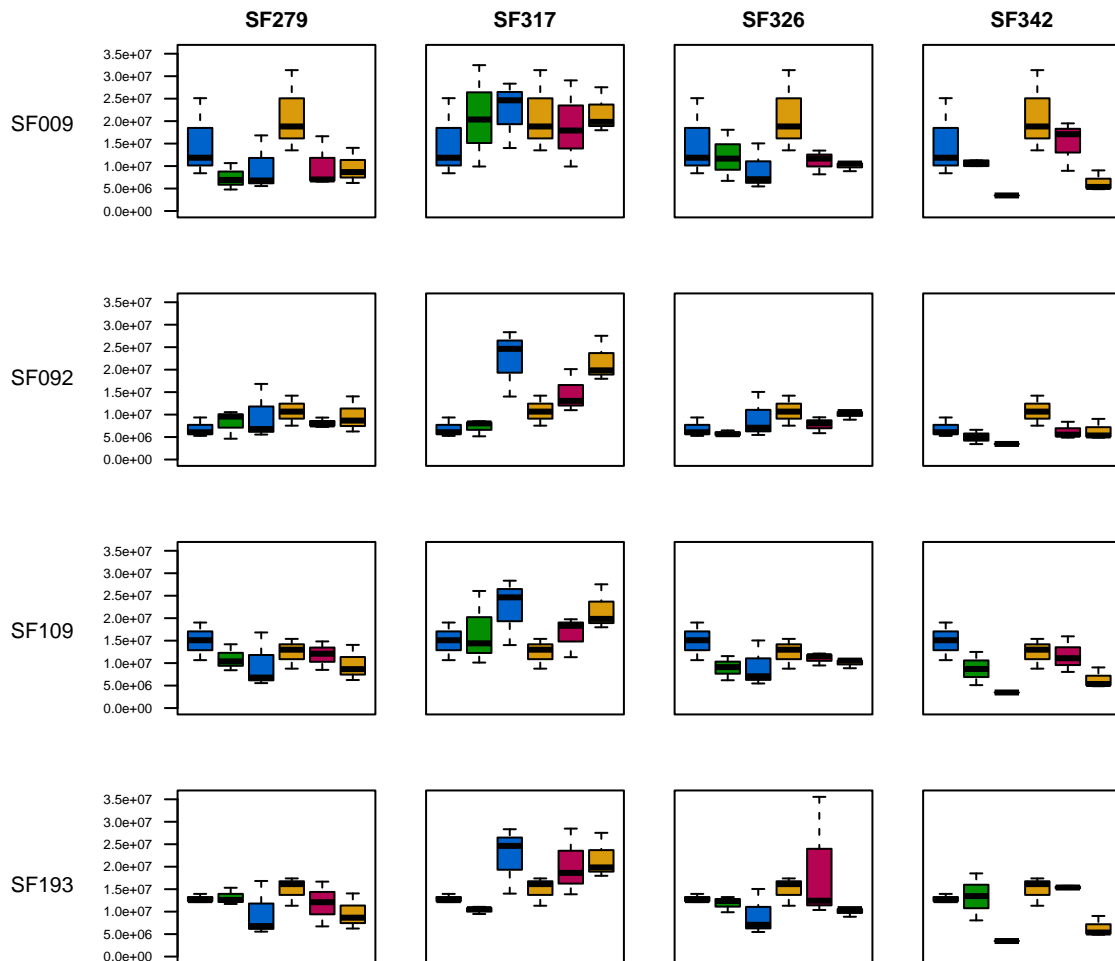

HanXRQChr14g0438141  
Probable superoxide dismutase [Cu-Zn] 2

- Parents WW
- Parents WD
- Hybrids WW
- Hybrids WD

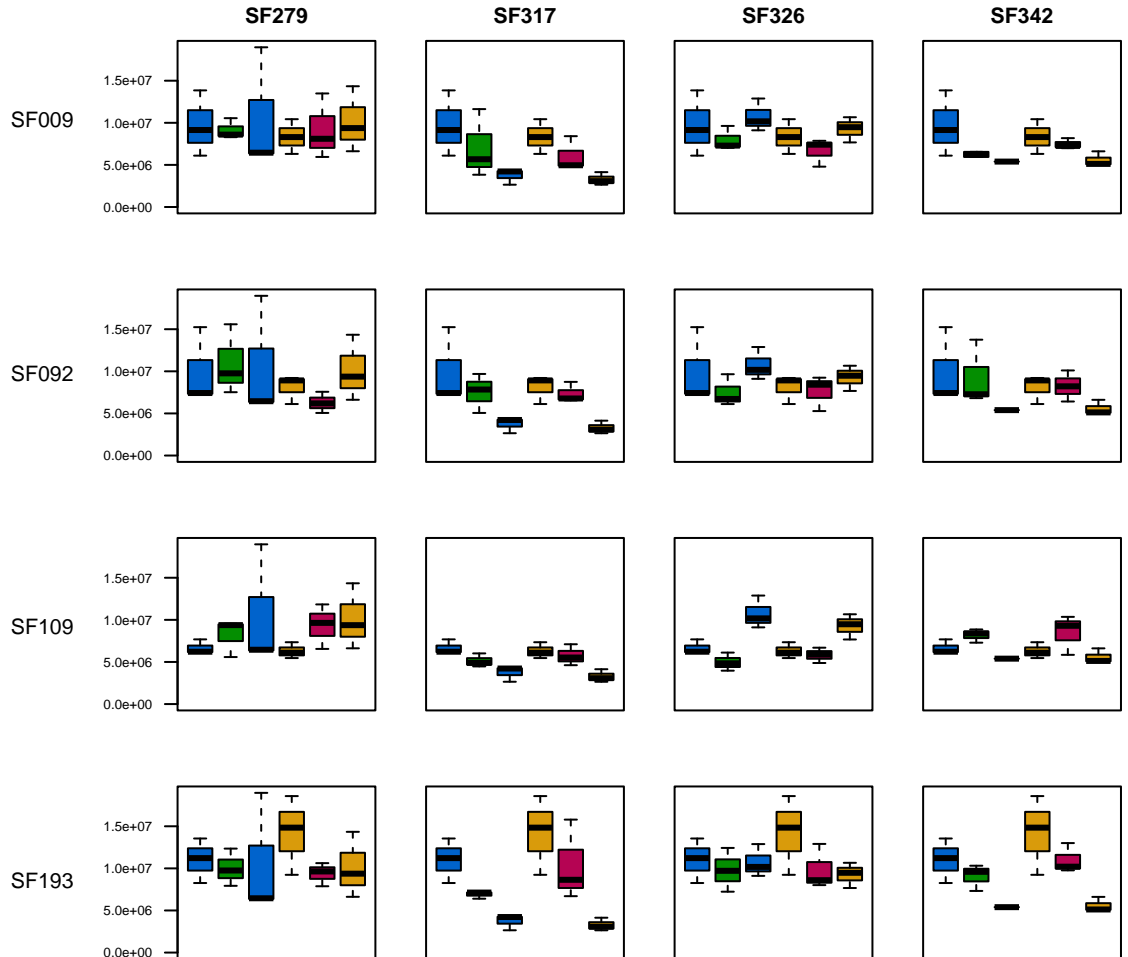



HanXRQChr00c0392g0574491  
Putative ribosomal protein S11;  
DNA-directed RNA polymerase, RBP11-lik

Parents WW  
Parents WD  
Hybrids WW  
Hybrids WD

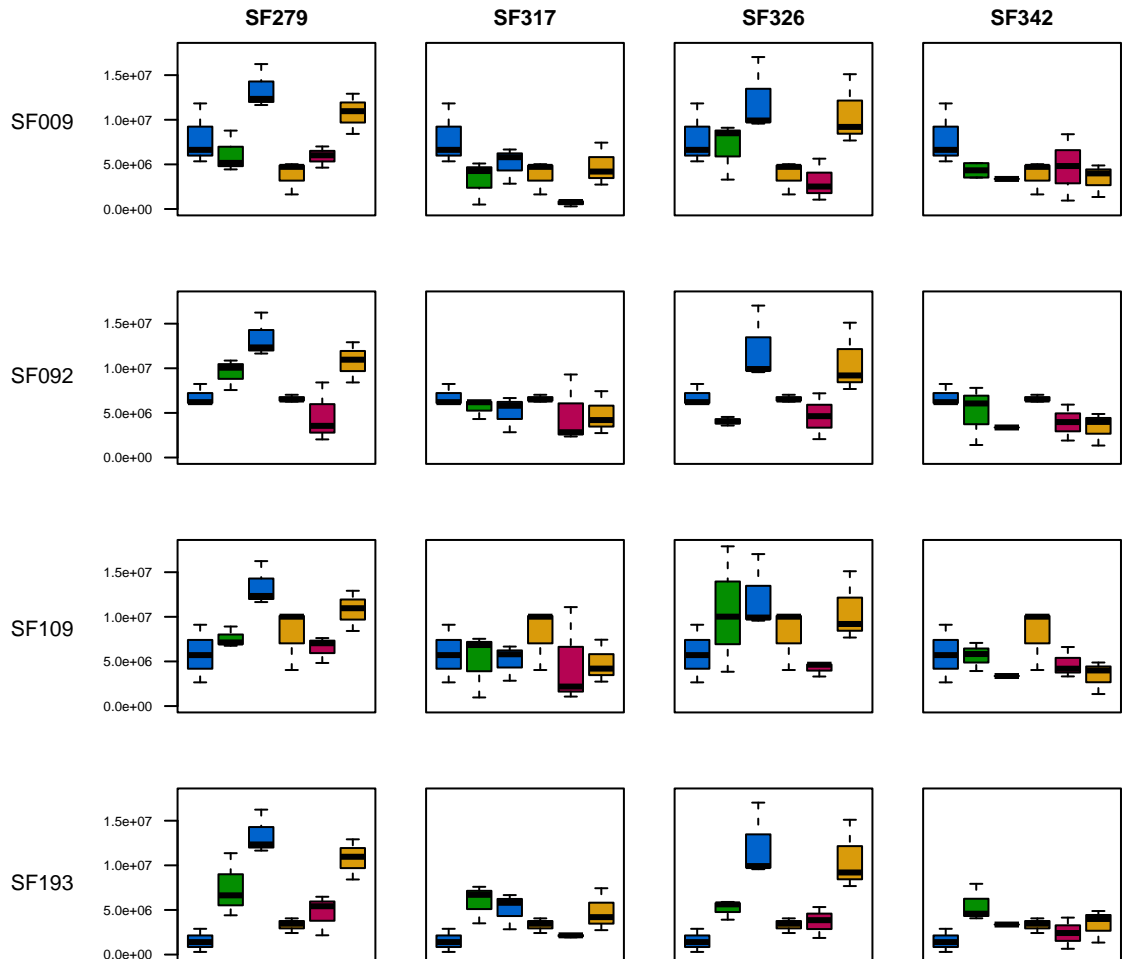

HanXRQChr13g0393431  
Probable ATP-citrate synthase beta  
chain protein 1

Parents WW  
Parents WD  
Hybrids WW  
Hybrids WD

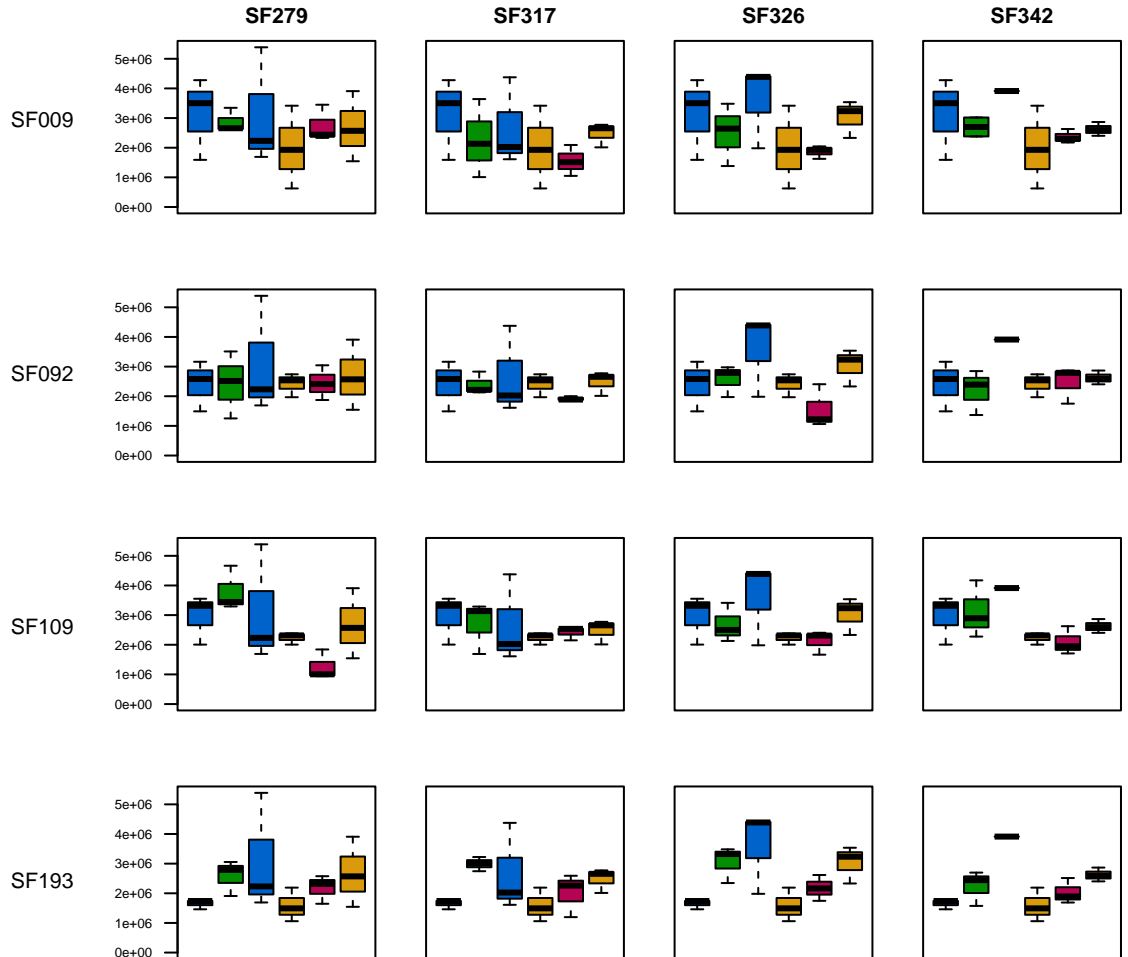

HanXRQChr08g0221521  
Probable superoxide dismutase [Mn],  
mitochondrial

Parents WW  
Parents WD  
Hybrids WW  
Hybrids WD

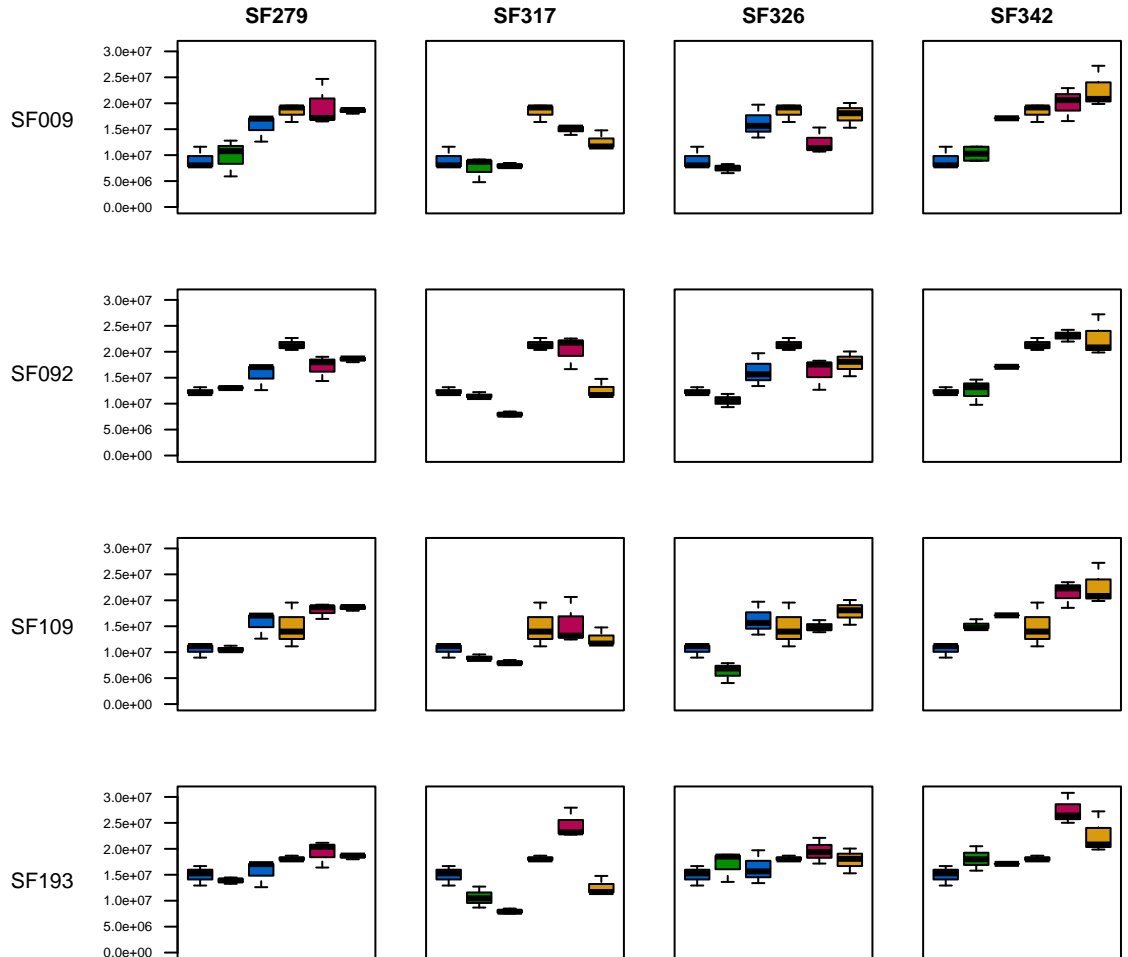

HanXRQChr13g0410301  
Probable cyclase associated protein 1

Parents WW  
Parents WD  
Hybrids WW  
Hybrids WD

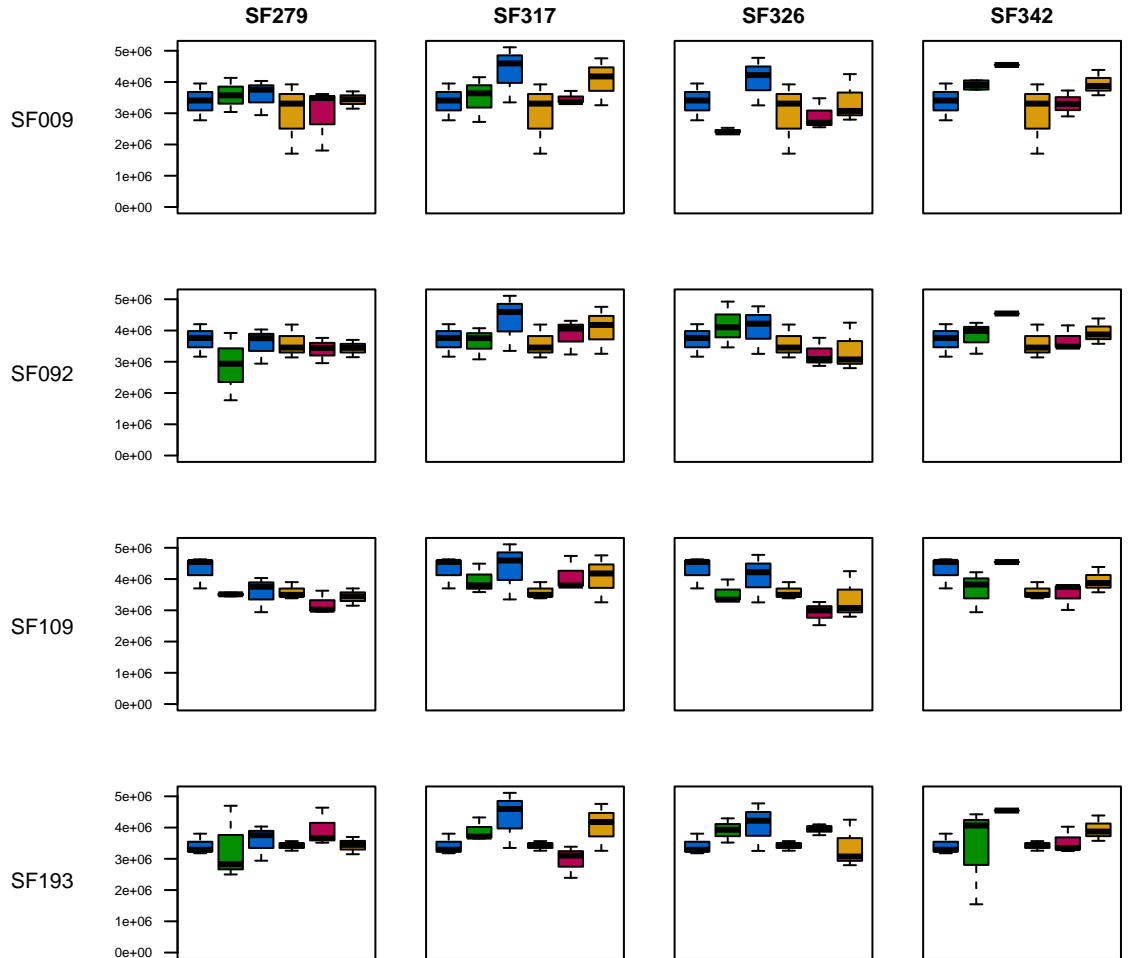

HanXRQChr17g0534151  
Probable outer envelope protein of 80  
kDa

Parents WW  
Parents WD  
Hybrids WW  
Hybrids WD

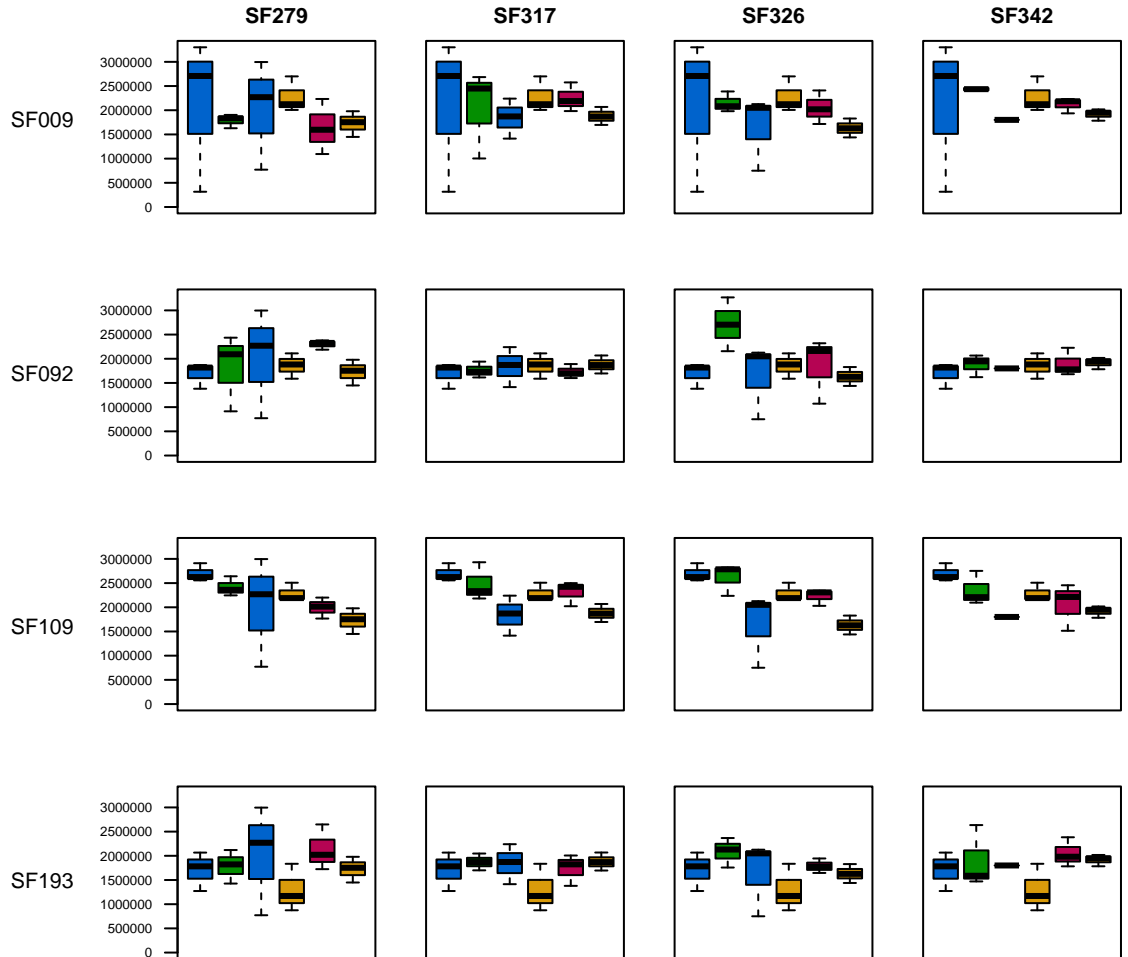

HanXRQChr10g0302791  
Probable thioredoxin M1, chloroplastic

Parents WW  
Parents WD  
Hybrids WW  
Hybrids WD

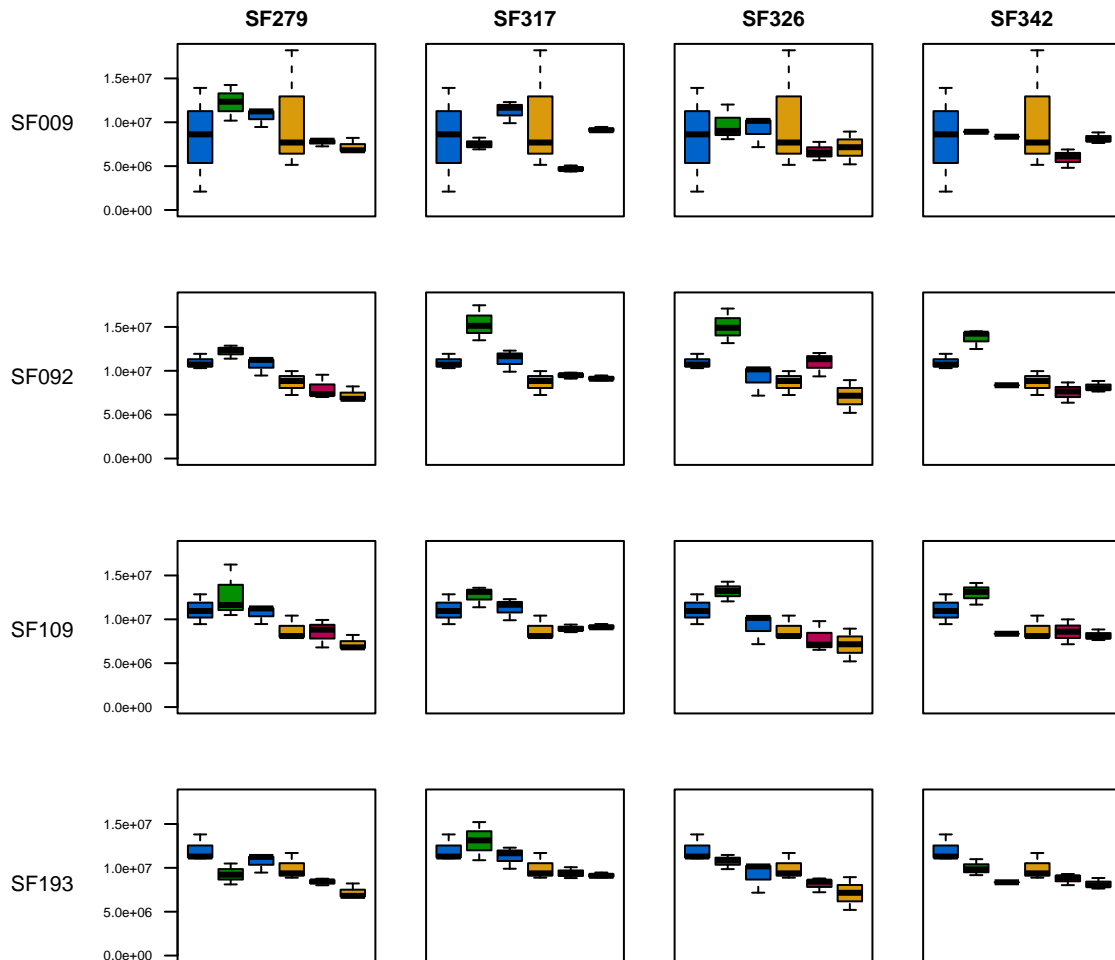

HanXRQChr14g0453231  
Probable sucrose-phosphatase 2

- Parents WW
- Parents WD
- Hybrids WW
- Hybrids WD

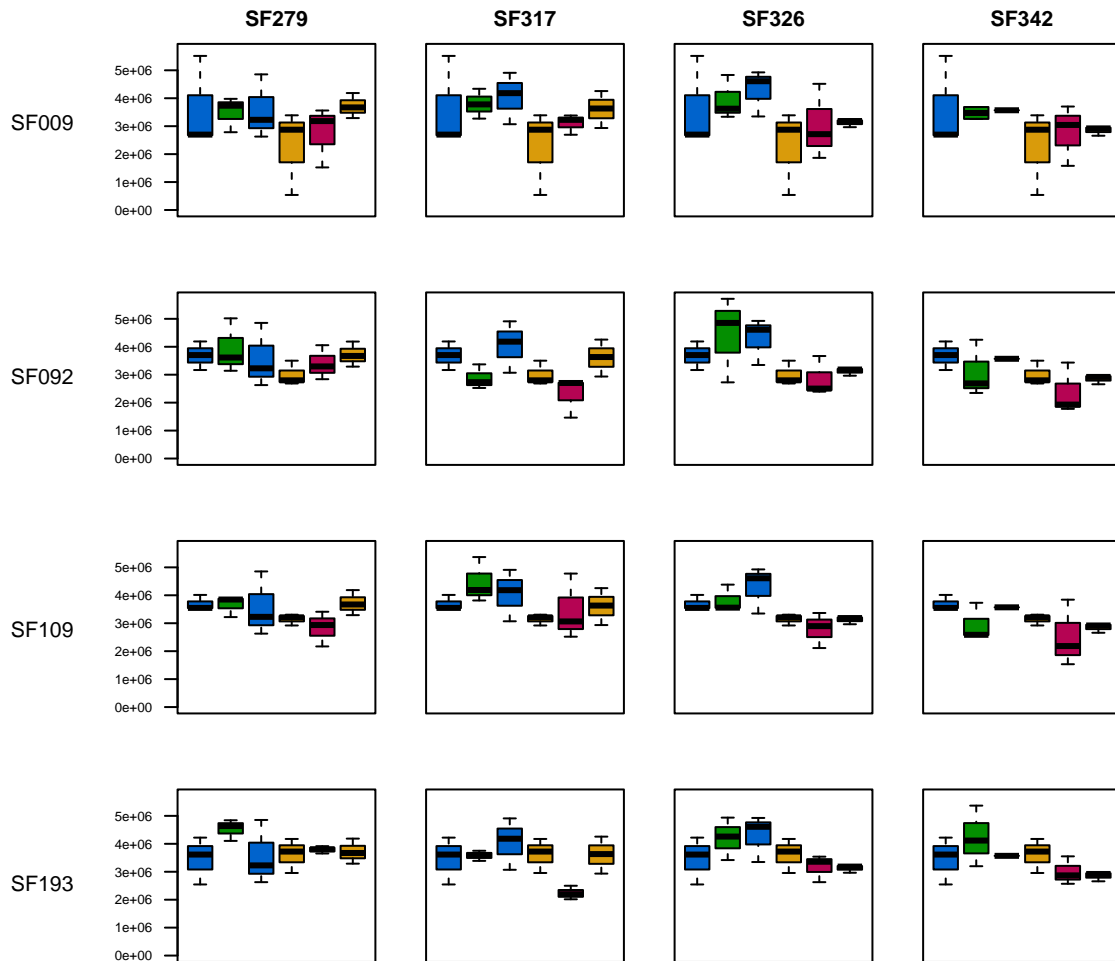

HanXRQChr15g0487121  
Probable succinate dehydrogenase 2-2

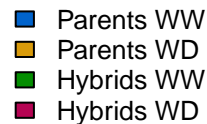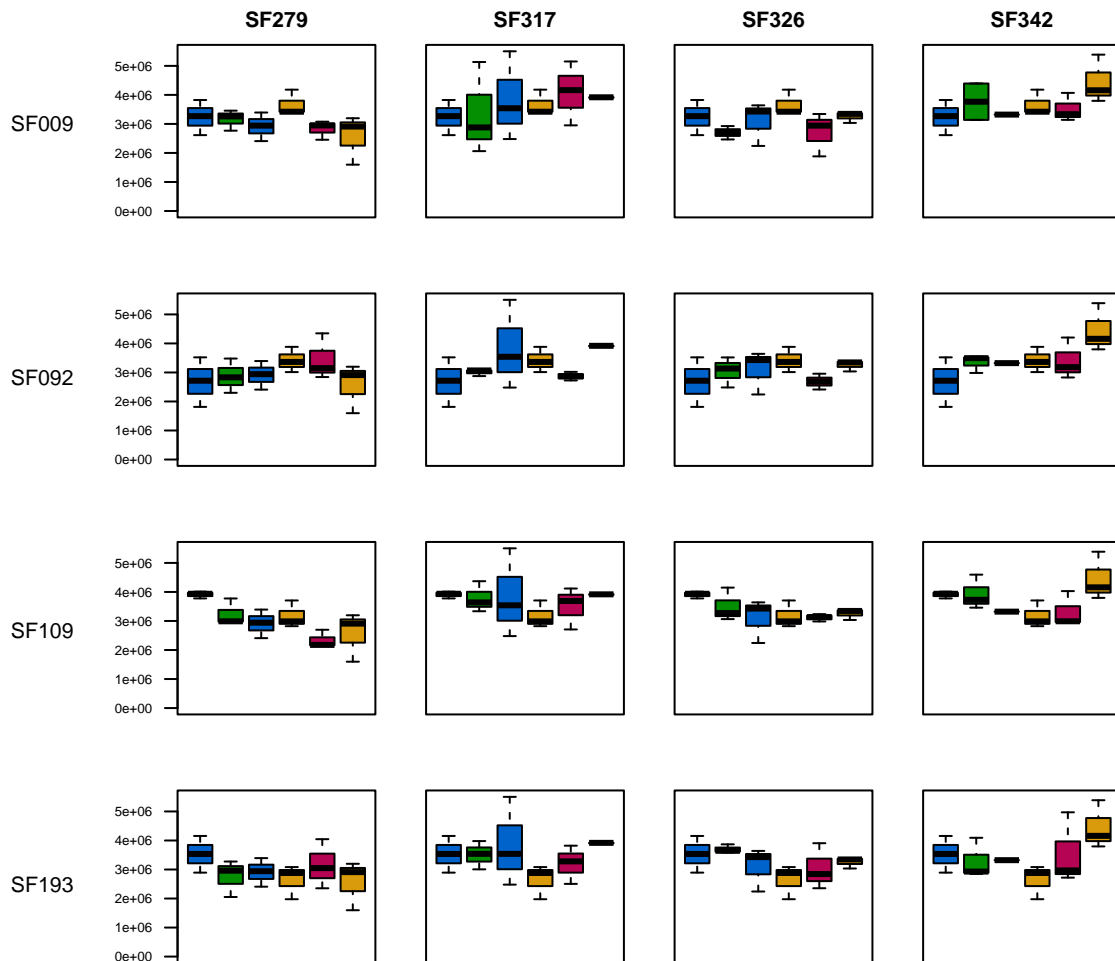



HanXRQChr10g0291221  
Putative heat shock protein 70 family;  
Heat shock protein 70kD, peptide-binding c

Parents WW  
Parents WD  
Hybrids WW  
Hybrids WD

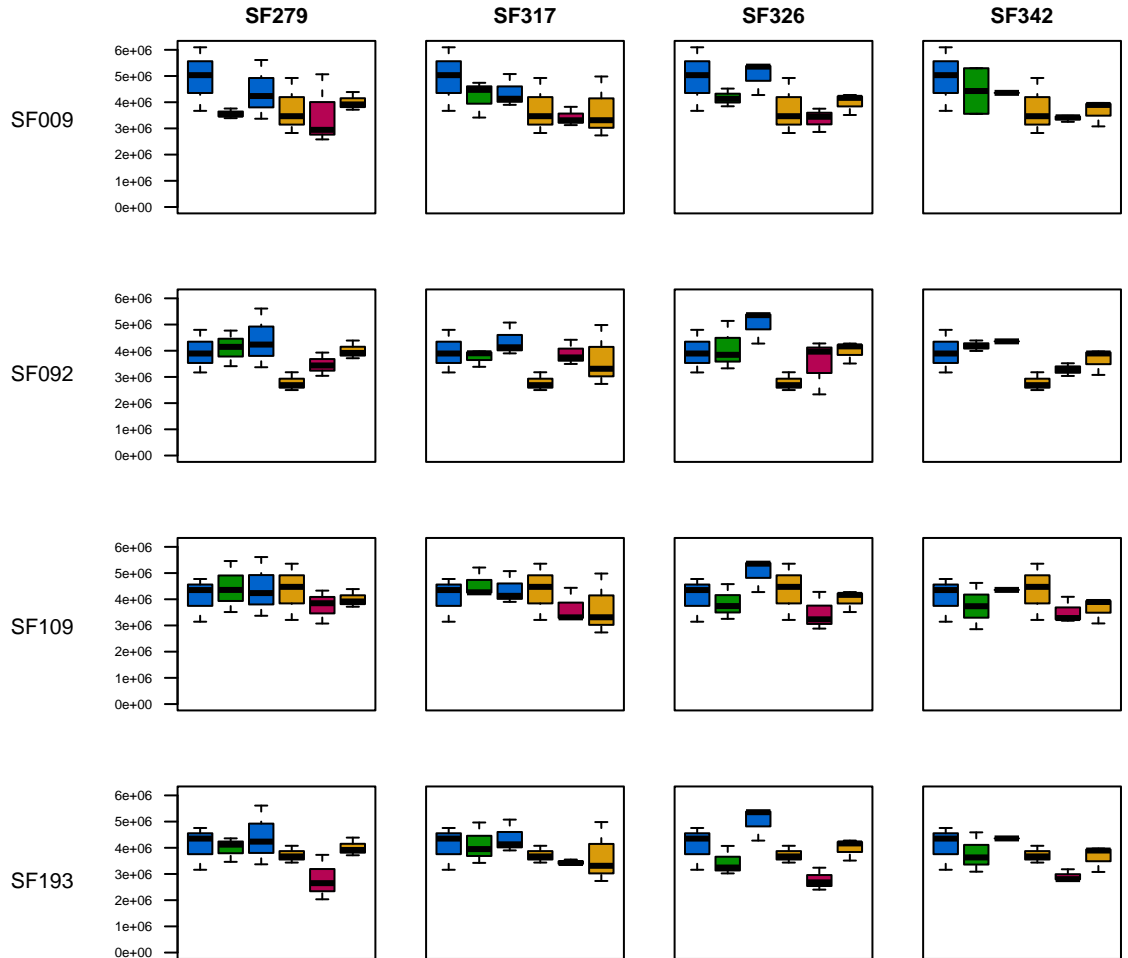

HanXRQChr17g0541211  
Putative ketol-acid reductoisomerase;  
UDP-glucose/GDP-mannose dehydrogenase

Parents WW  
Parents WD  
Hybrids WW  
Hybrids WD

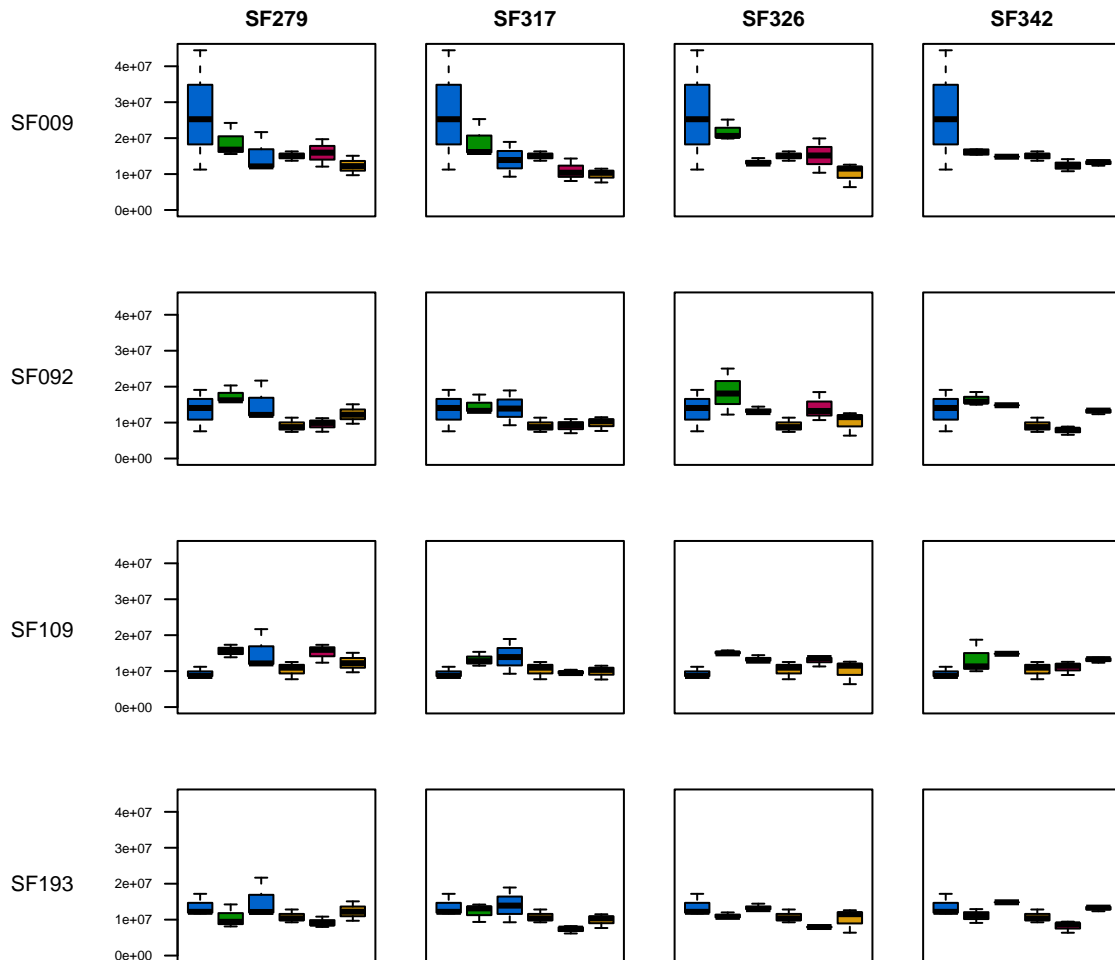

HanXRQChr10g0297011  
Putative  
UDP-glucuronosyl/UDP-glucosyltransferas

Parents WW  
Parents WD  
Hybrids WW  
Hybrids WD

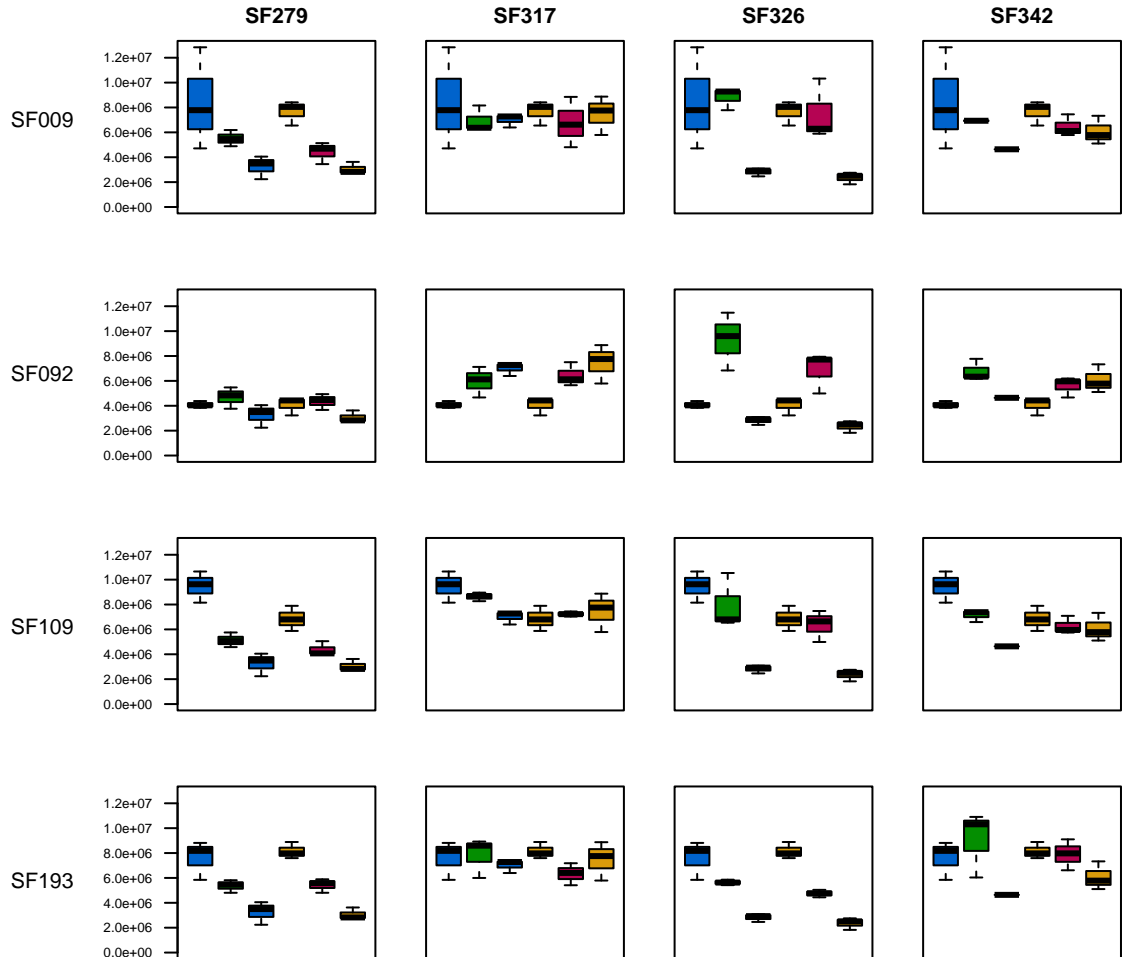

HanXRQChr14g0456781  
Probable adenosine kinase 2

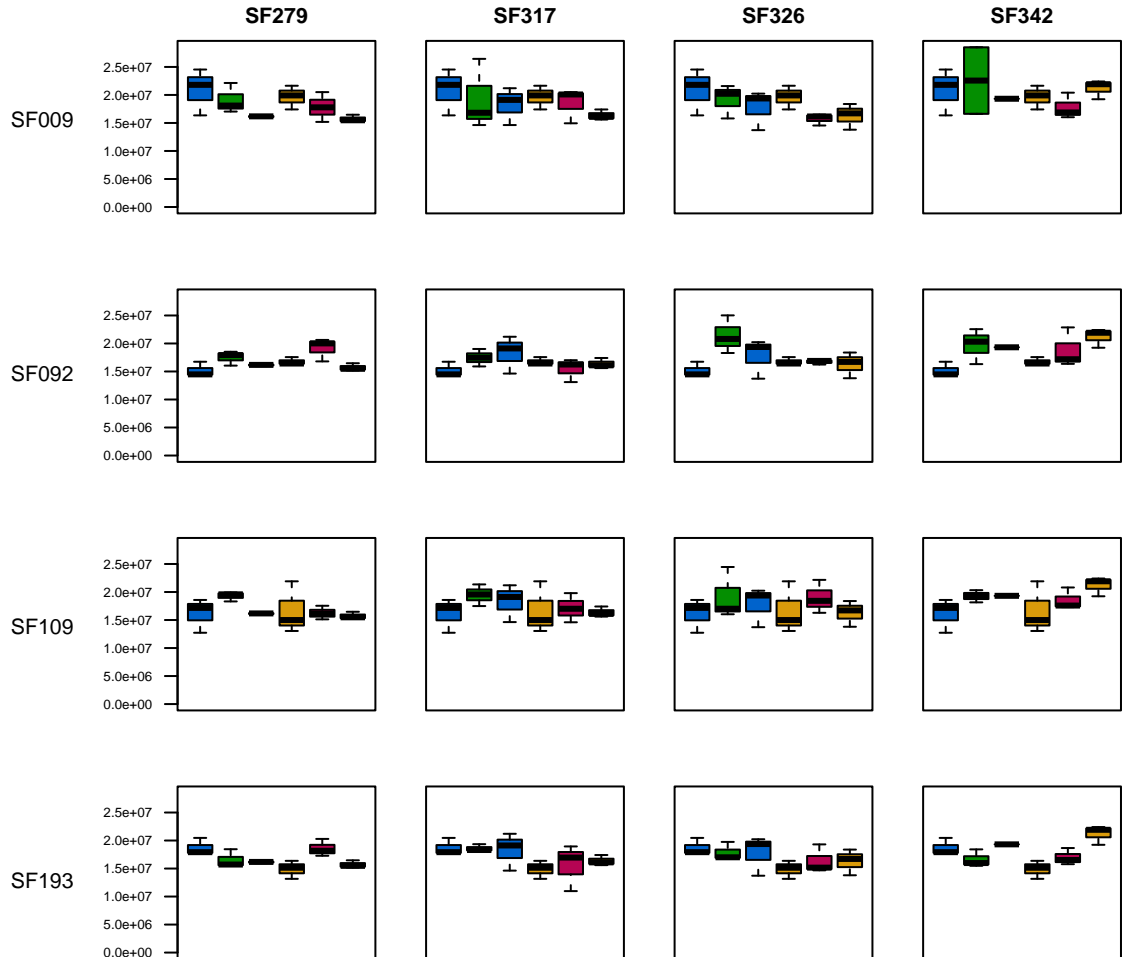

HanXRQChr16g0531381  
 Probable ferredoxin--NADP reductase,  
 leaf-type isozyme, chloroplastic

Parents WW  
 Parents WD  
 Hybrids WW  
 Hybrids WD

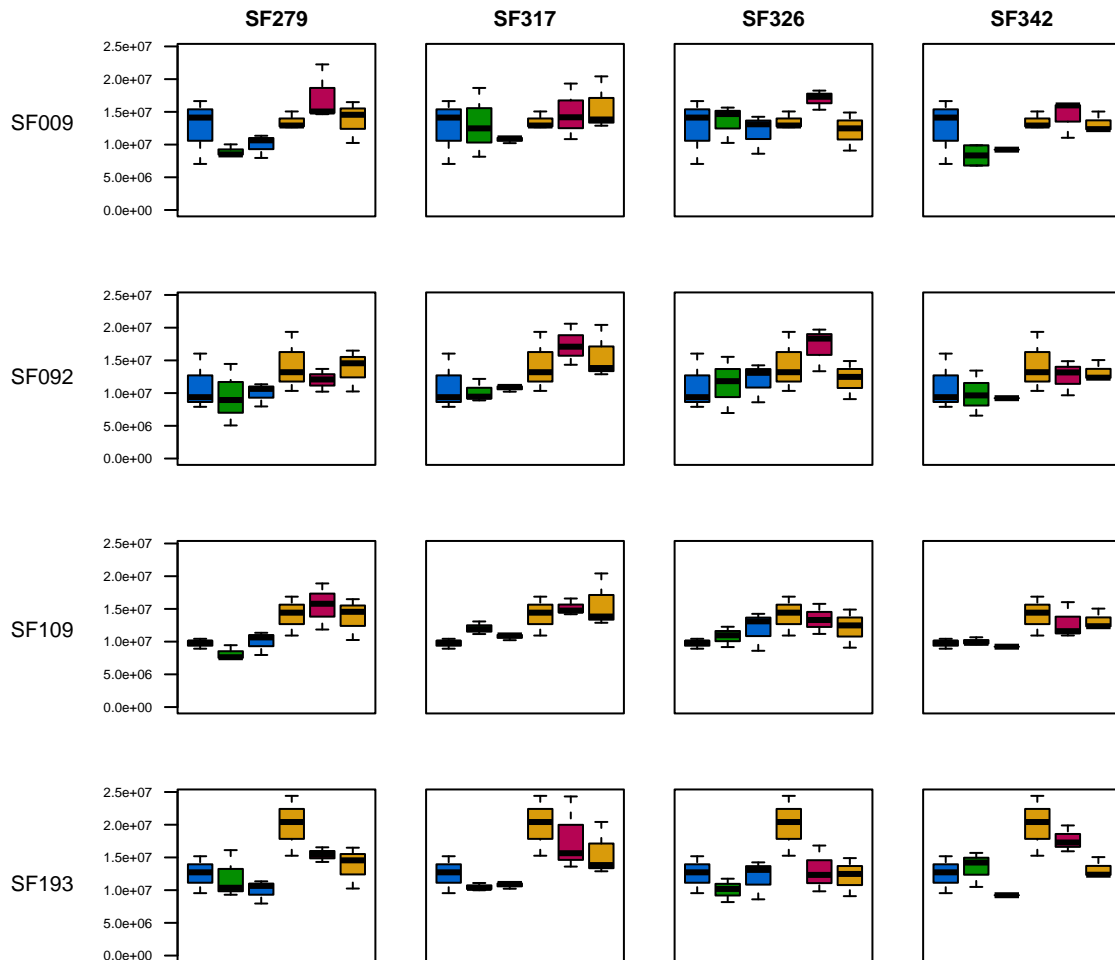

HanXRQChr12g0367761  
Probable peptidase M1 family protein

Parents WW  
Parents WD  
Hybrids WW  
Hybrids WD

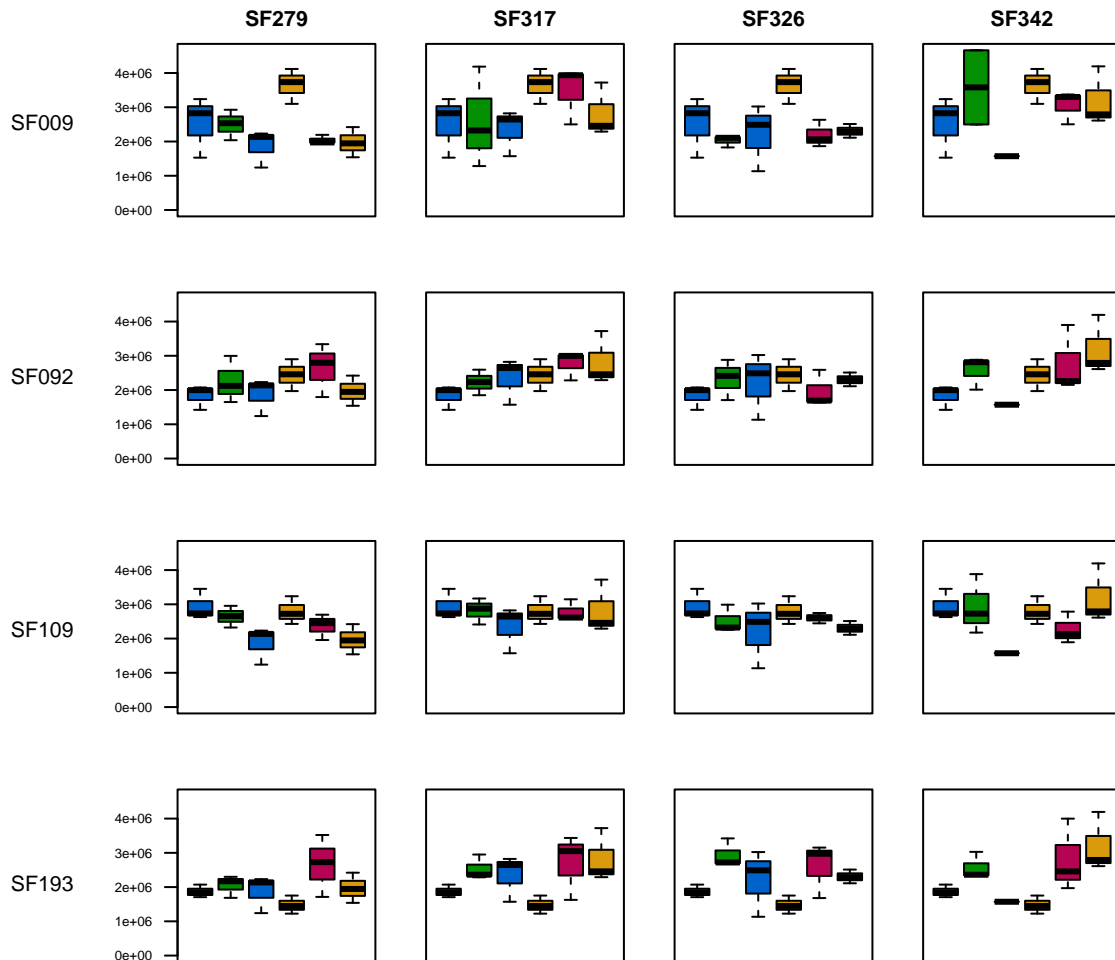

HanXRQChr08g0211871  
 Probable insulinase (Peptidase family  
 M16) protein

Parents WW  
 Parents WD  
 Hybrids WW  
 Hybrids WD

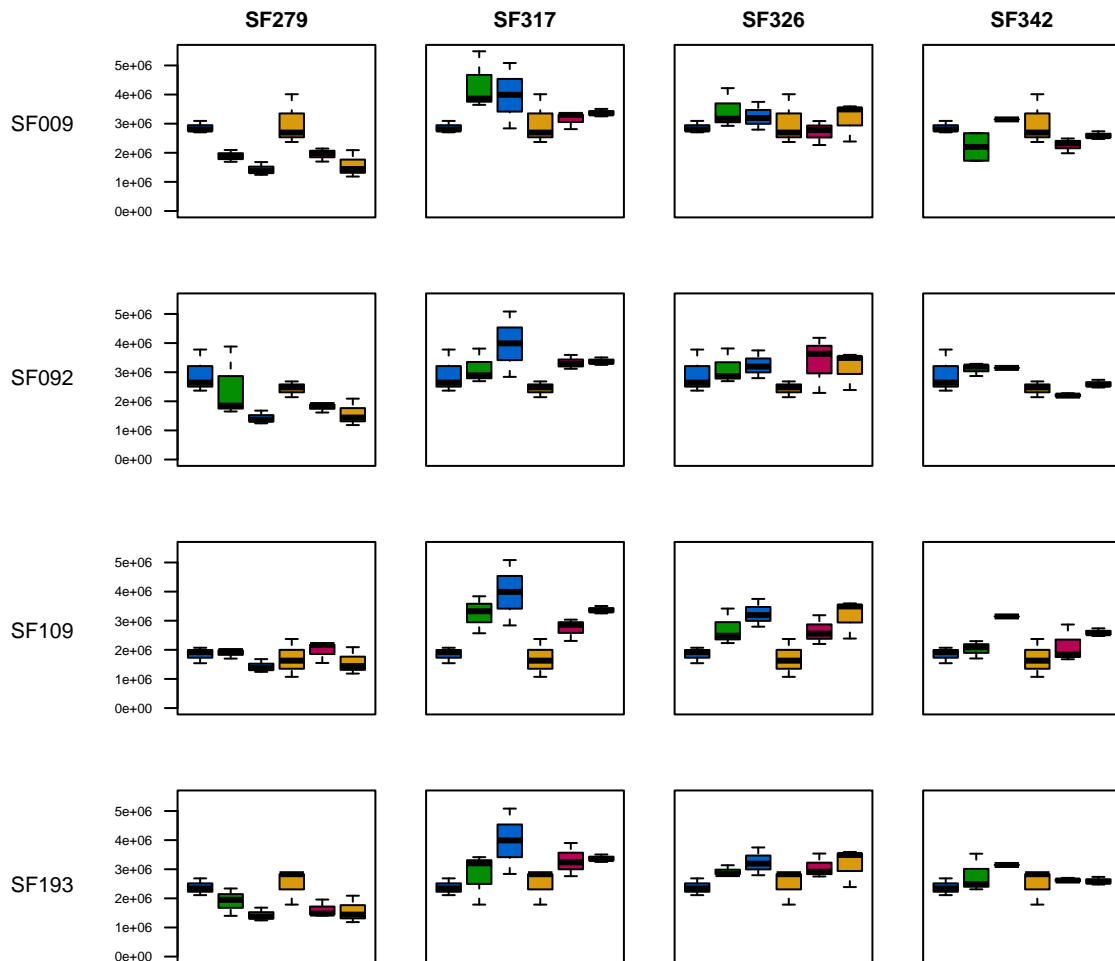

HanXRQChr09g0265401  
Putative peptidase M10A;  
Metallopeptidase, catalytic domain

Parents WW  
Parents WD  
Hybrids WW  
Hybrids WD

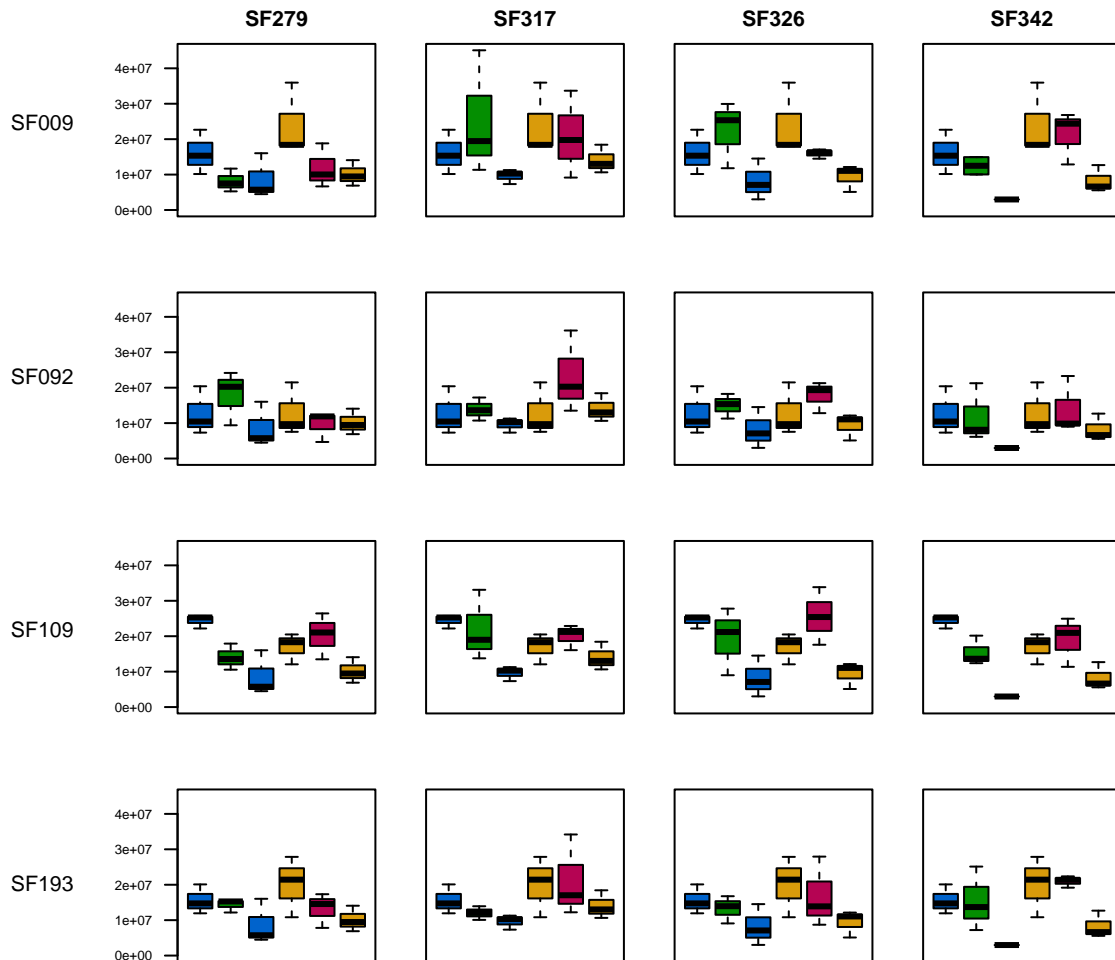



HanXRQChr03g0066731  
Putative bifunctional polymyxin  
resistance protein, ArnA

Parents WW  
Parents WD  
Hybrids WW  
Hybrids WD

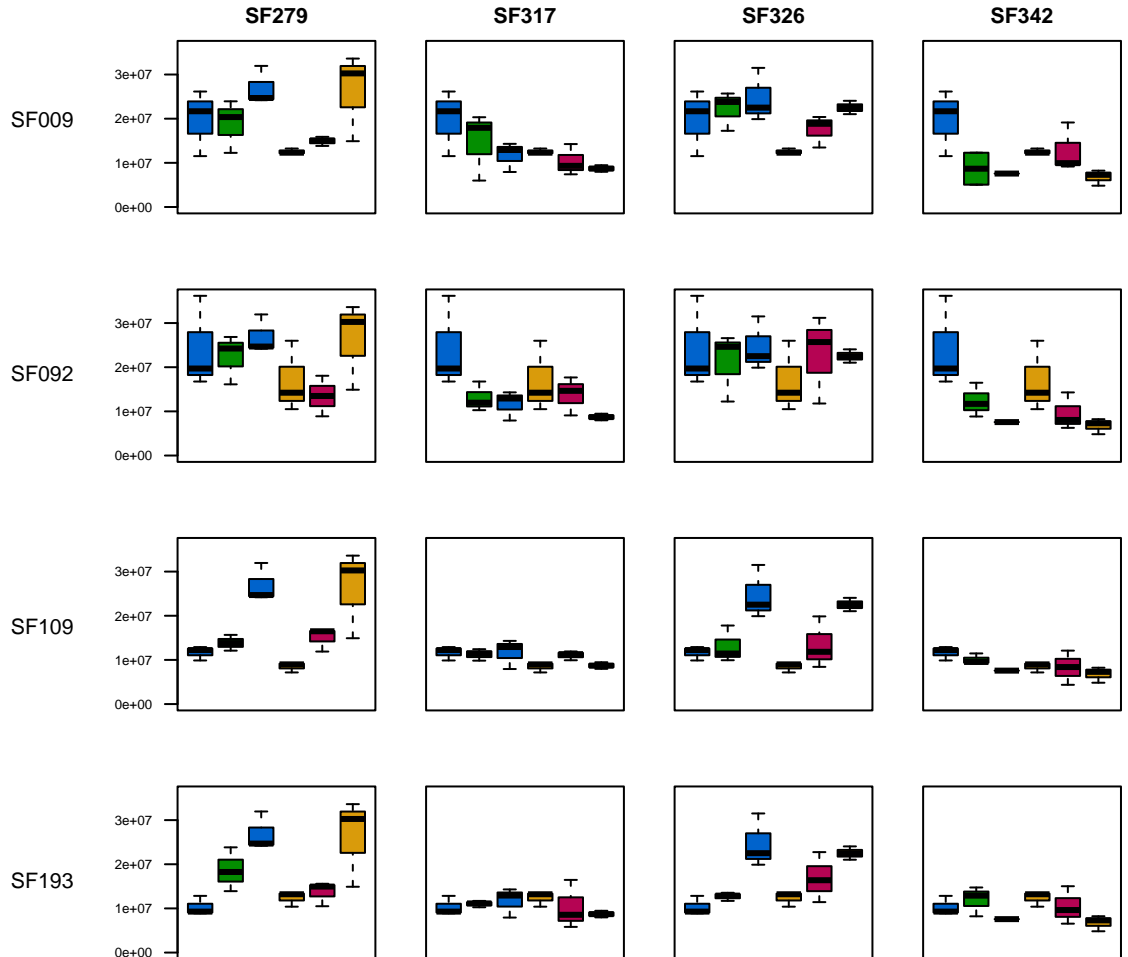

HanXRQChr01g0001631  
Probable peptide chain release factor 1

Parents WW  
Parents WD  
Hybrids WW  
Hybrids WD

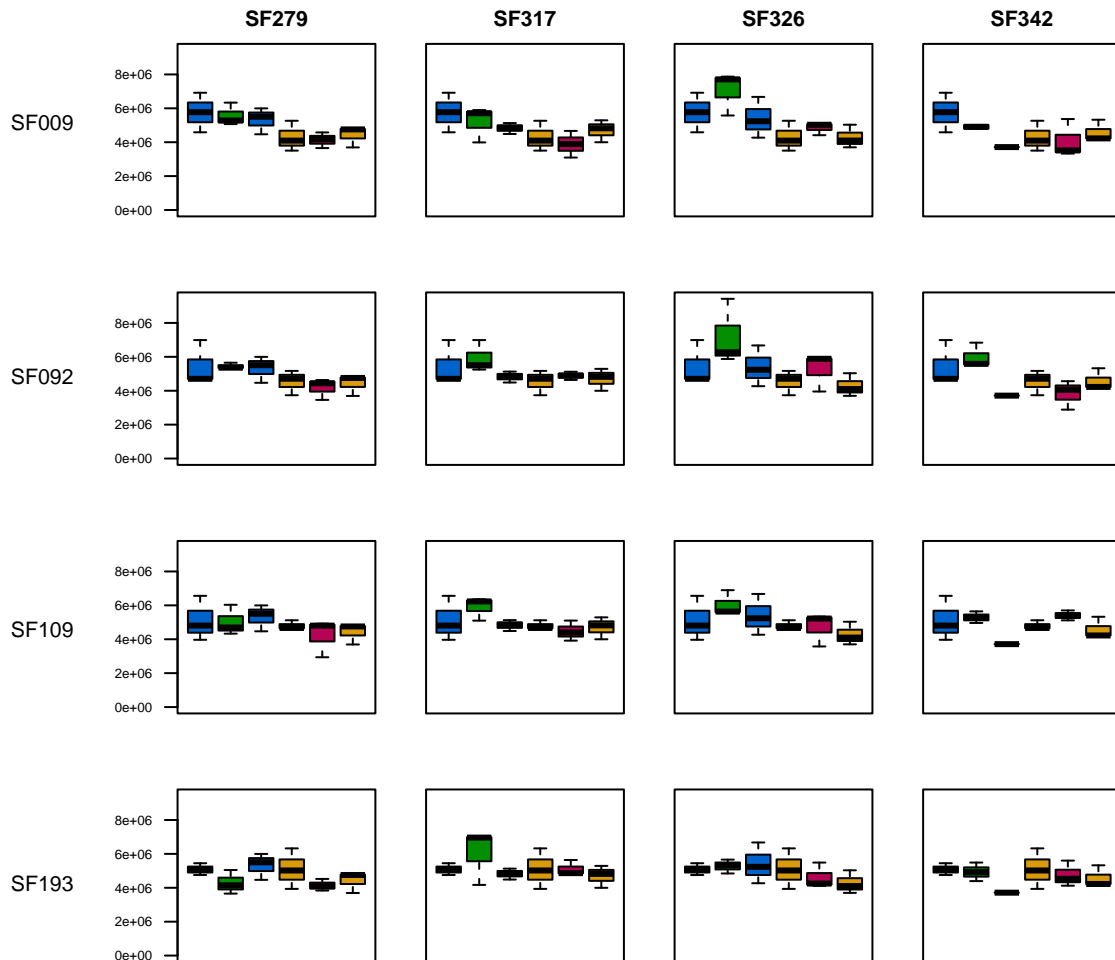

HanXRQChr04g0115051  
Putative ubiquitin; Ubiquitin-related  
domain

Parents WW  
Parents WD  
Hybrids WW  
Hybrids WD

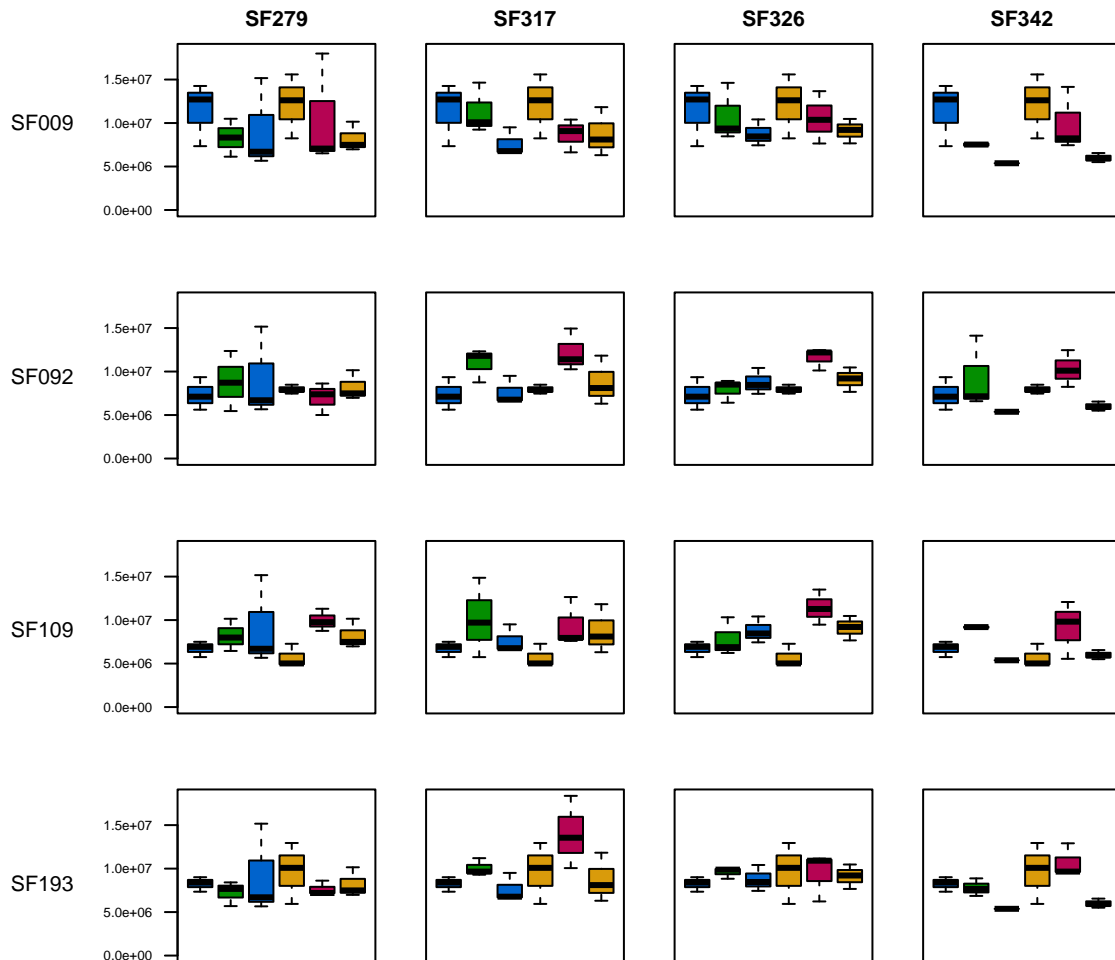

HanXRQChr10g0315571  
Putative 2-oxoglutarate dehydrogenase  
E1 component; Thiamin diphosphate-bindi

Parents WW  
Parents WD  
Hybrids WW  
Hybrids WD

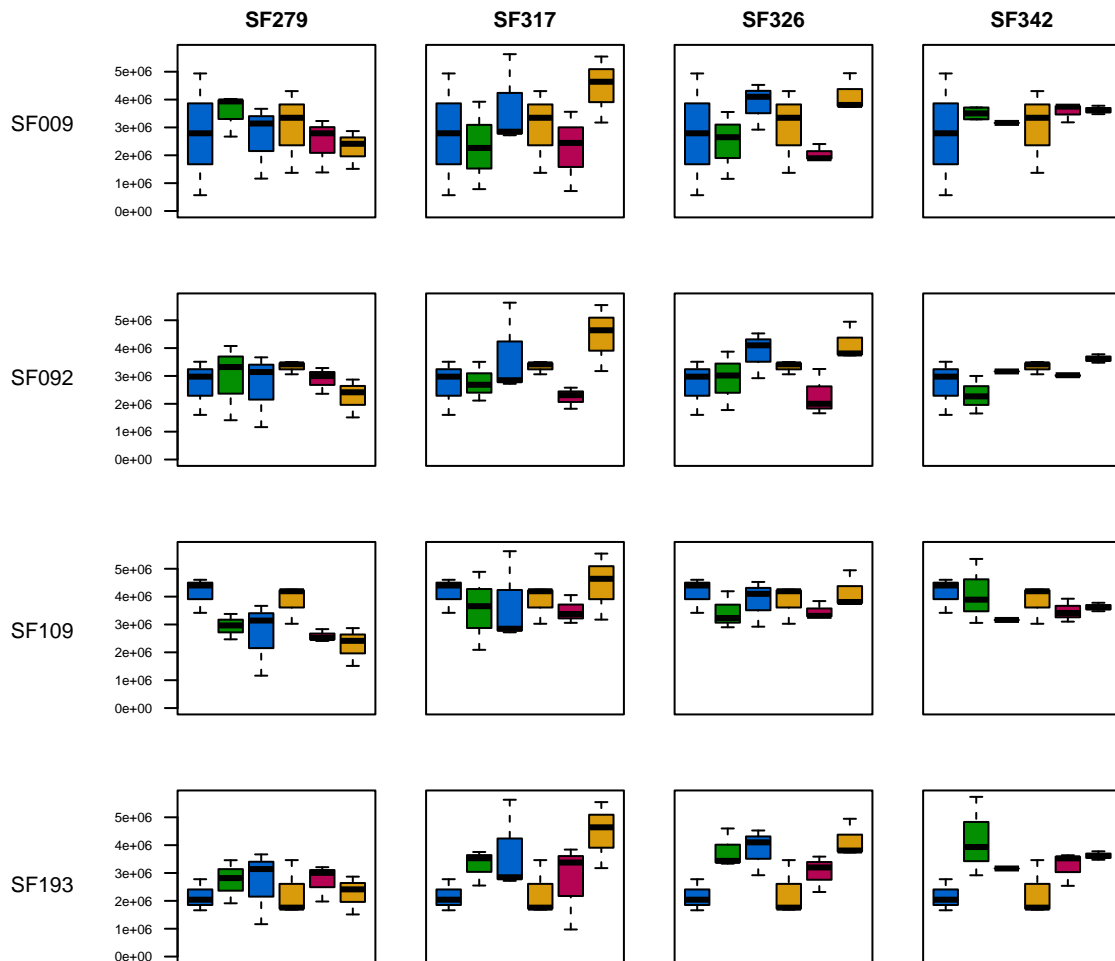

HanXRQChr02g0053581  
Probable NAD(P)-binding Rossmann-fold  
superfamily protein

Parents WW  
Parents WD  
Hybrids WW  
Hybrids WD

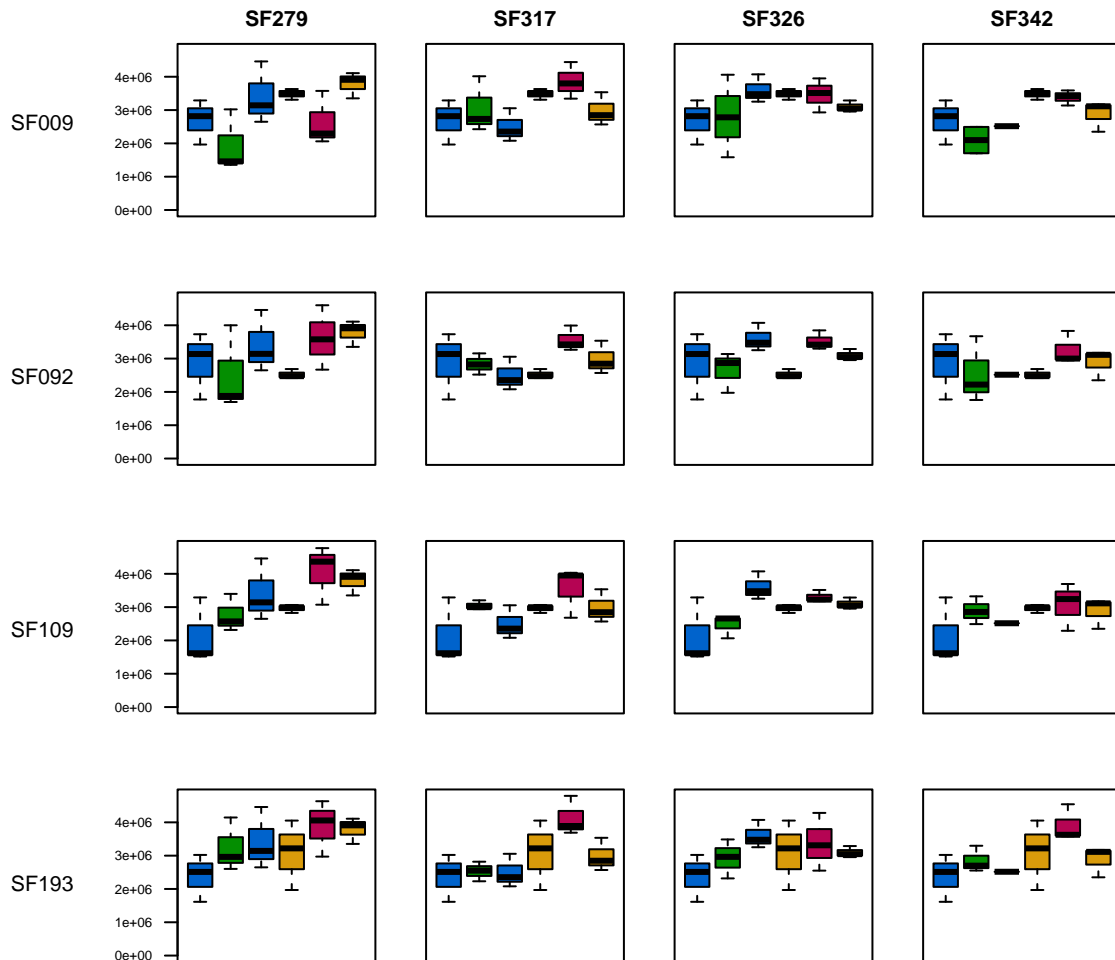

HanXRQChr17g0556041  
Probable magnesium-chelatase subunit  
ChlI, chloroplastic

Parents WW  
Parents WD  
Hybrids WW  
Hybrids WD

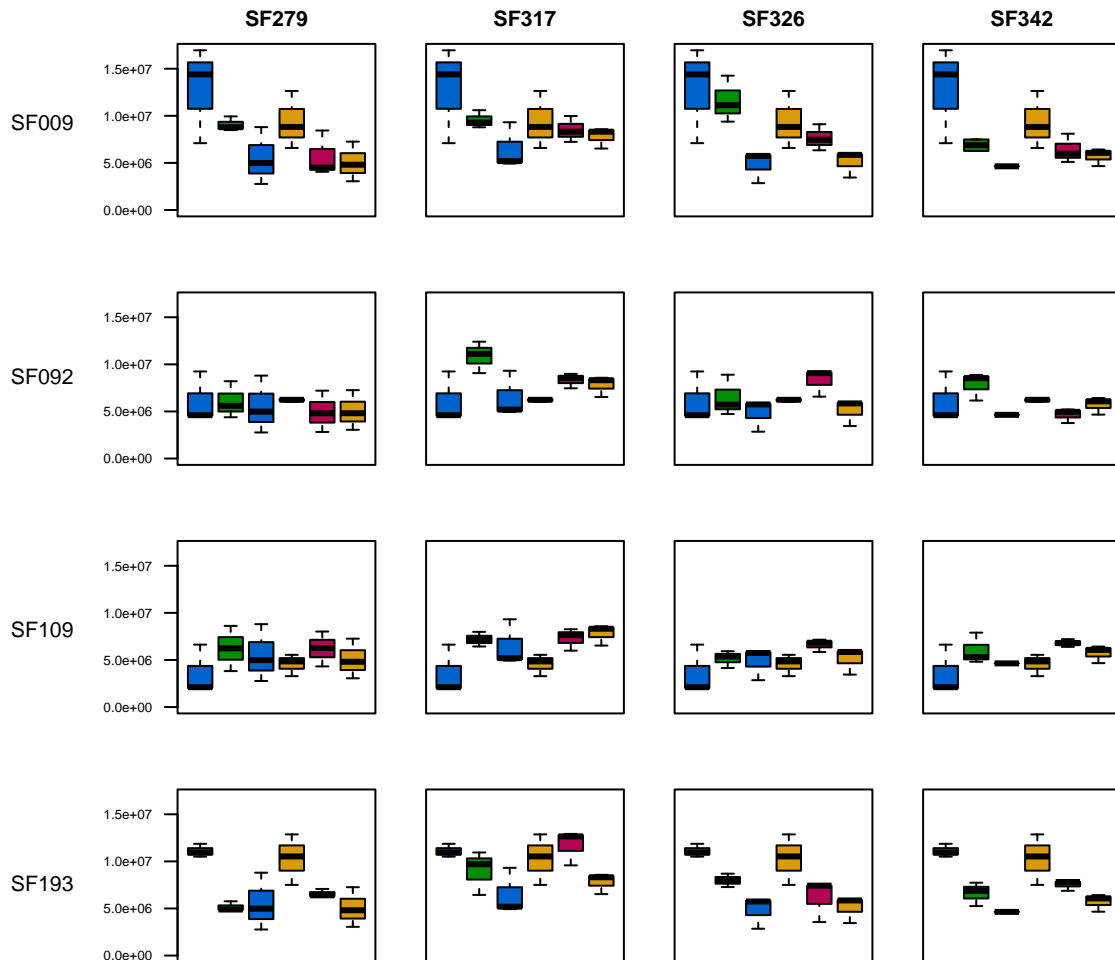

HanXRQChr14g0462551  
Putative heat shock protein Hsp90 family

- Parents WW
- Parents WD
- Hybrids WW
- Hybrids WD

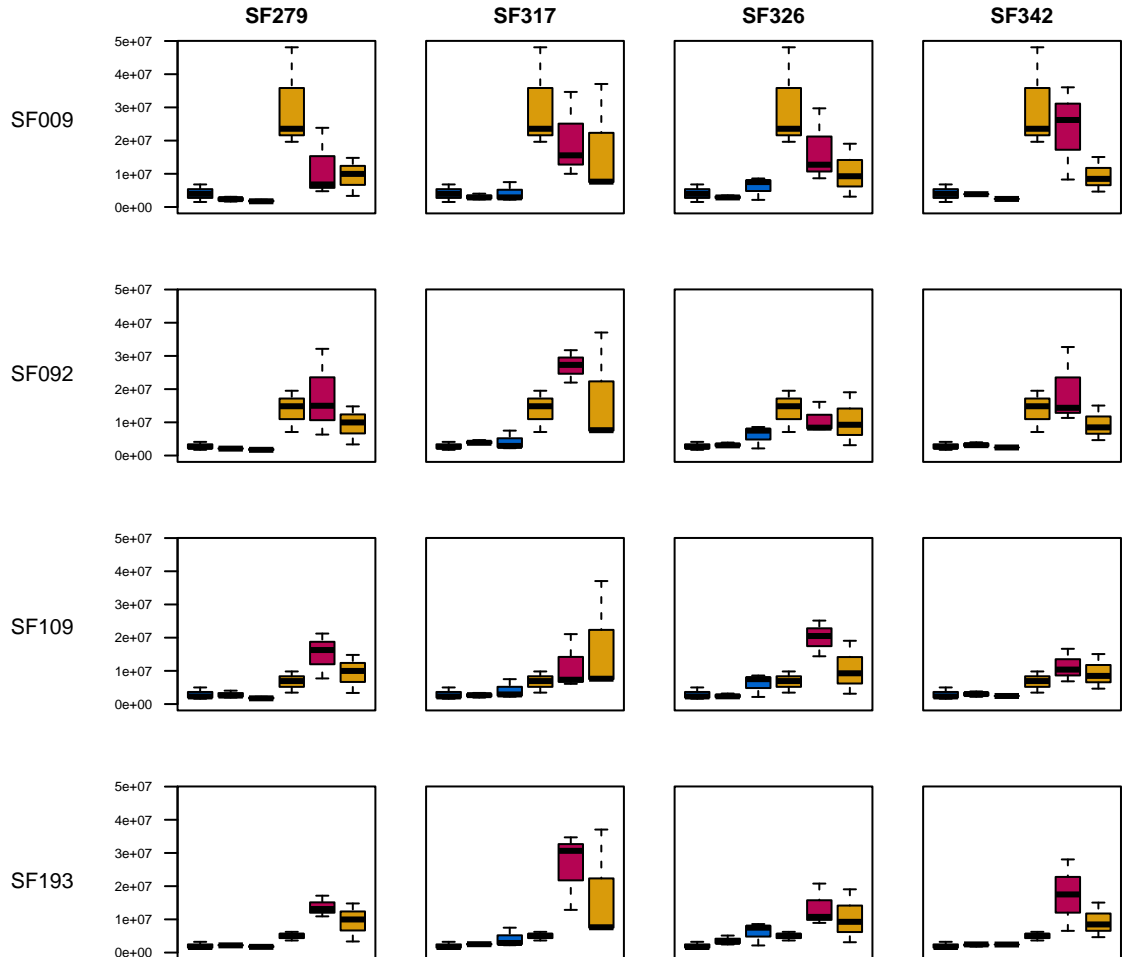

HanXRQChr17g0547901  
Probable carbonic anhydrase 1

Parents WW  
Parents WD  
Hybrids WW  
Hybrids WD

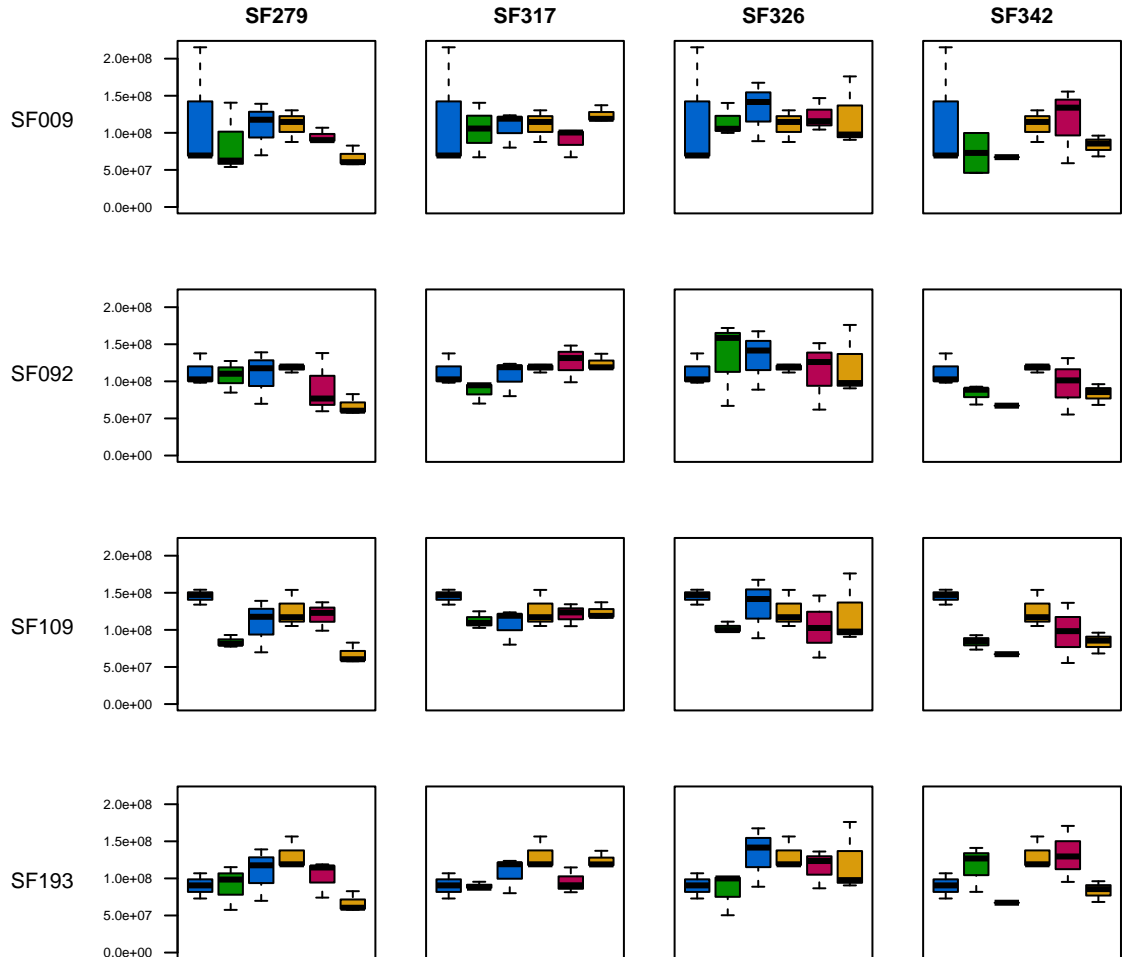



HanXRQChr09g0270191  
Putative ribosomal protein S19e; Winged  
helix–turn–helix DNA–binding domain

Parents WW  
Parents WD  
Hybrids WW  
Hybrids WD

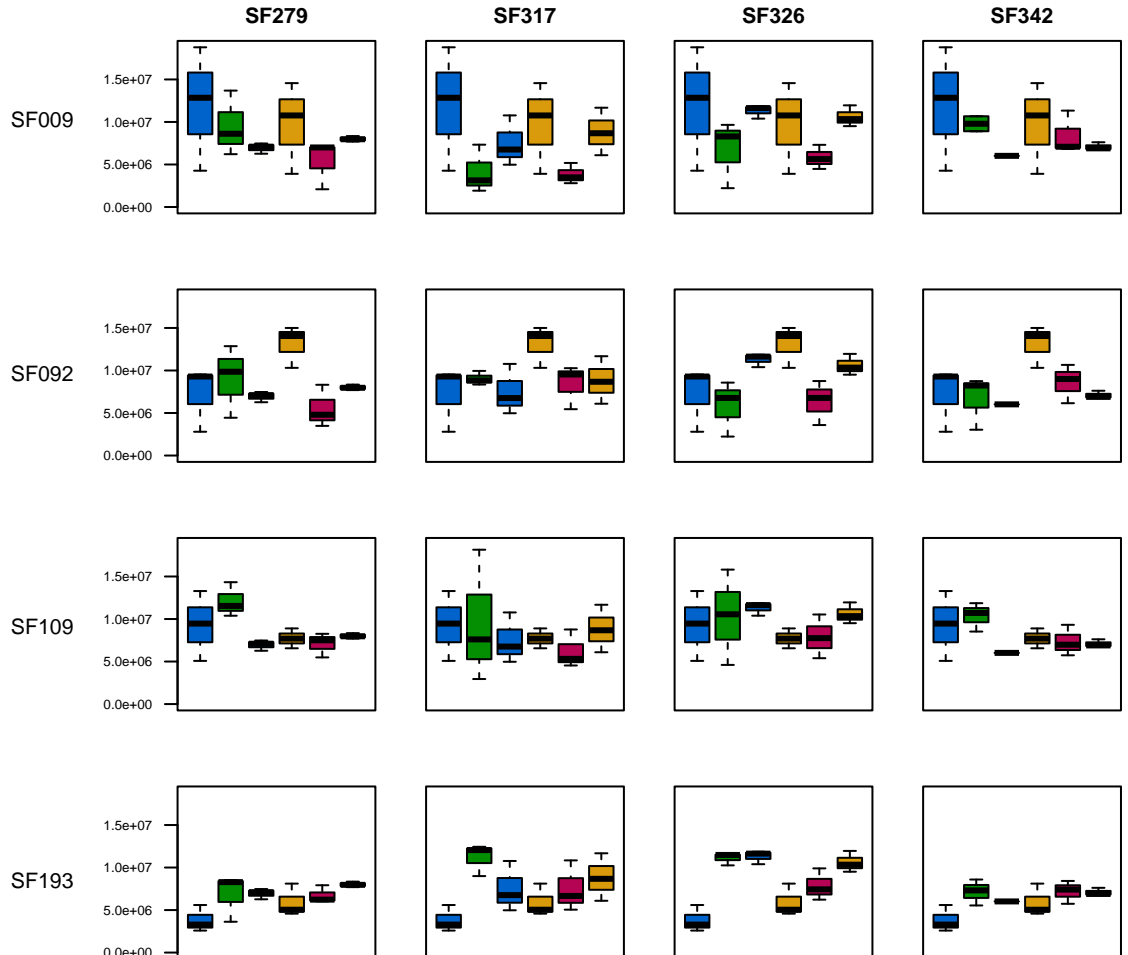

HanXRQChr10g0291961  
Probable magnesium-protoporphyrin IX  
monomethyl ester [oxidative] cyclase, chloro

Parents WW  
Parents WD  
Hybrids WW  
Hybrids WD

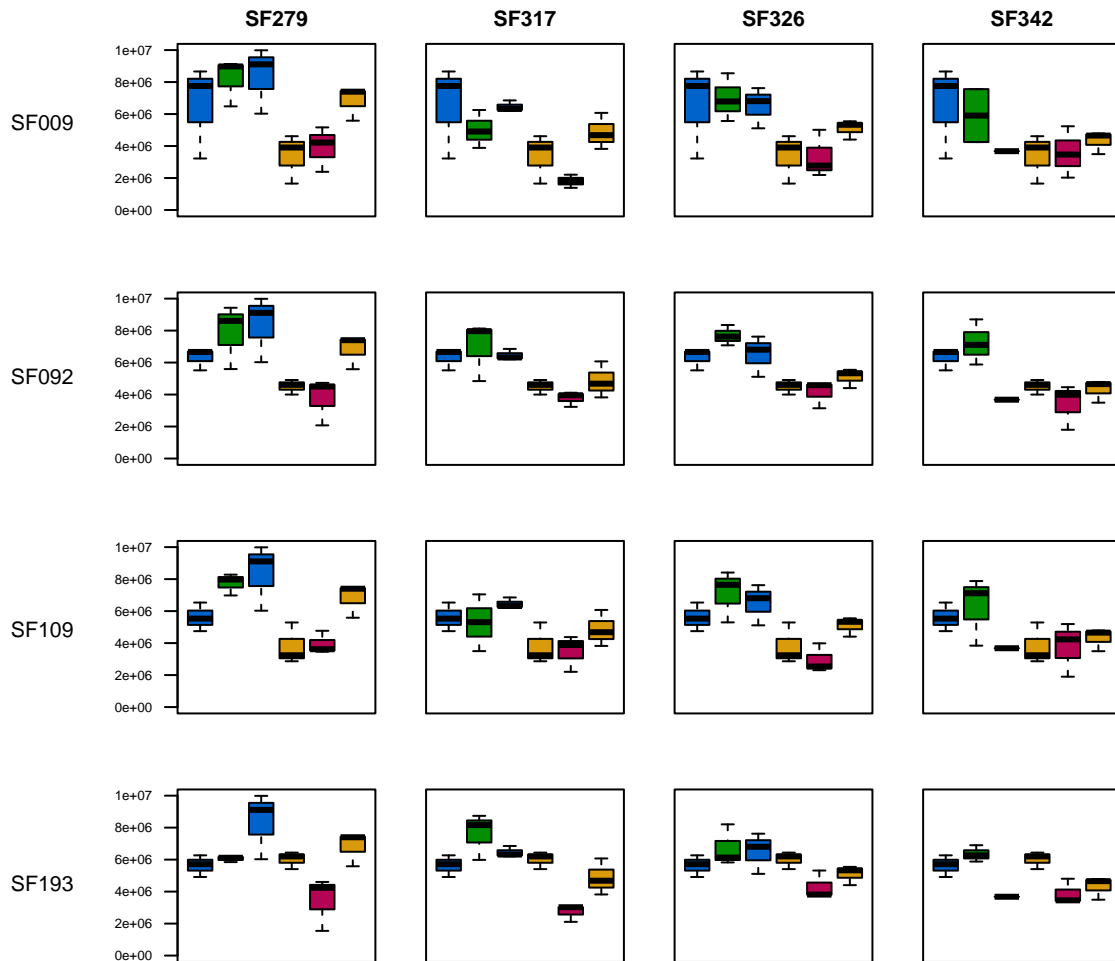

HanXRQChr15g0469481  
 Probable haloacid dehalogenase-like  
 hydrolase (HAD) superfamily protein

Parents WW  
 Parents WD  
 Hybrids WW  
 Hybrids WD

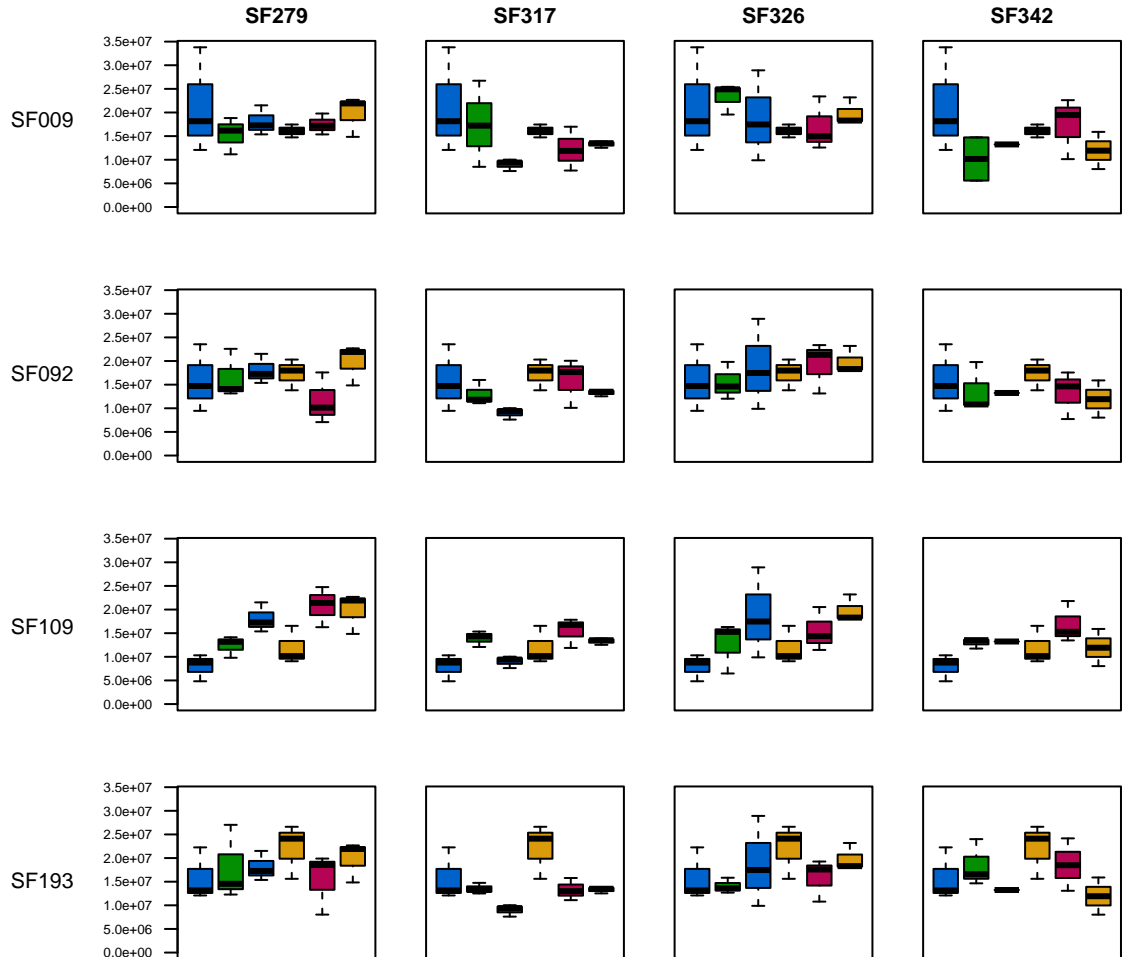

HanXRQChr03g0089781  
 Putative clp protease proteolytic  
 subunit /Translocation-enhancing protein Tc

Parents WW  
 Parents WD  
 Hybrids WW  
 Hybrids WD

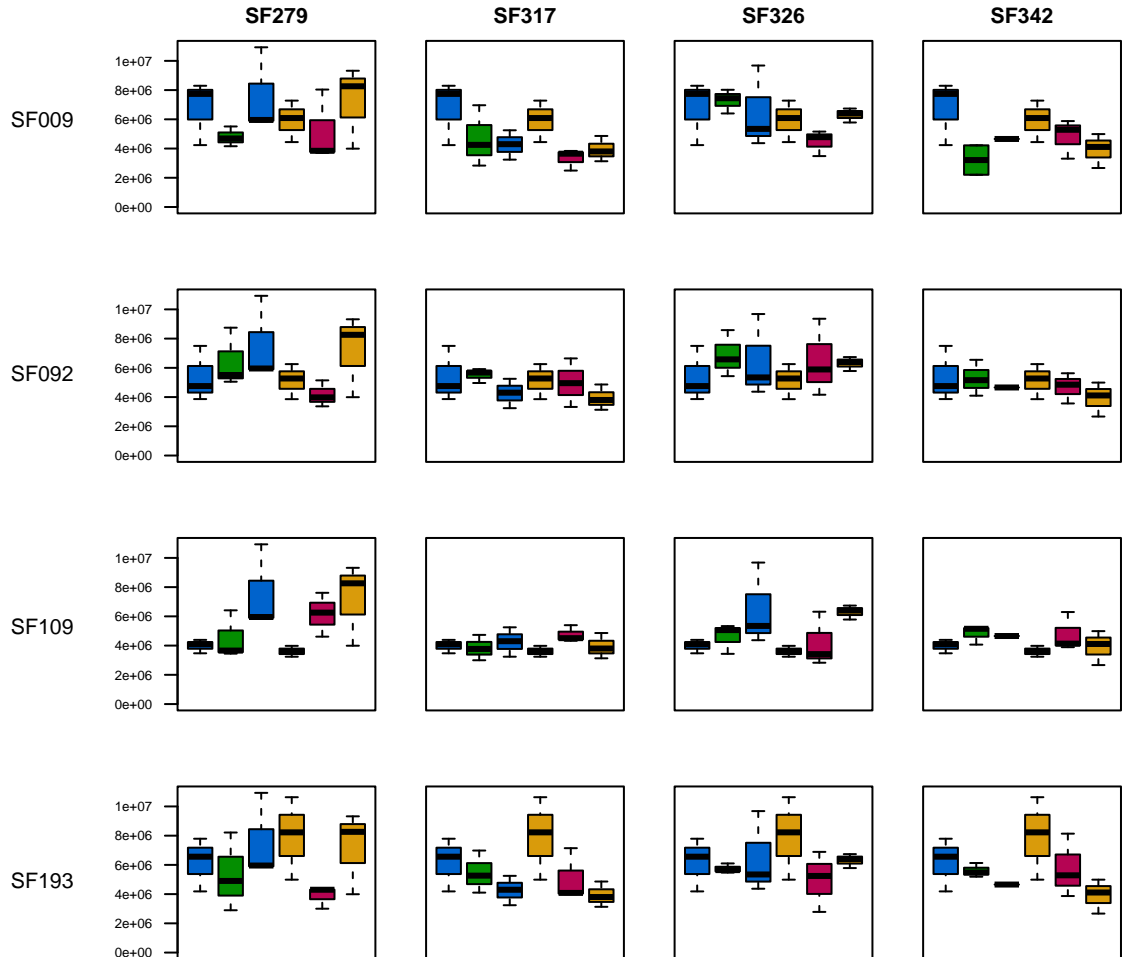

HanXRQChr07g0186621  
Putative PDZ domain;  
Tetratricopeptide-like helical domain

Parents WW  
Parents WD  
Hybrids WW  
Hybrids WD

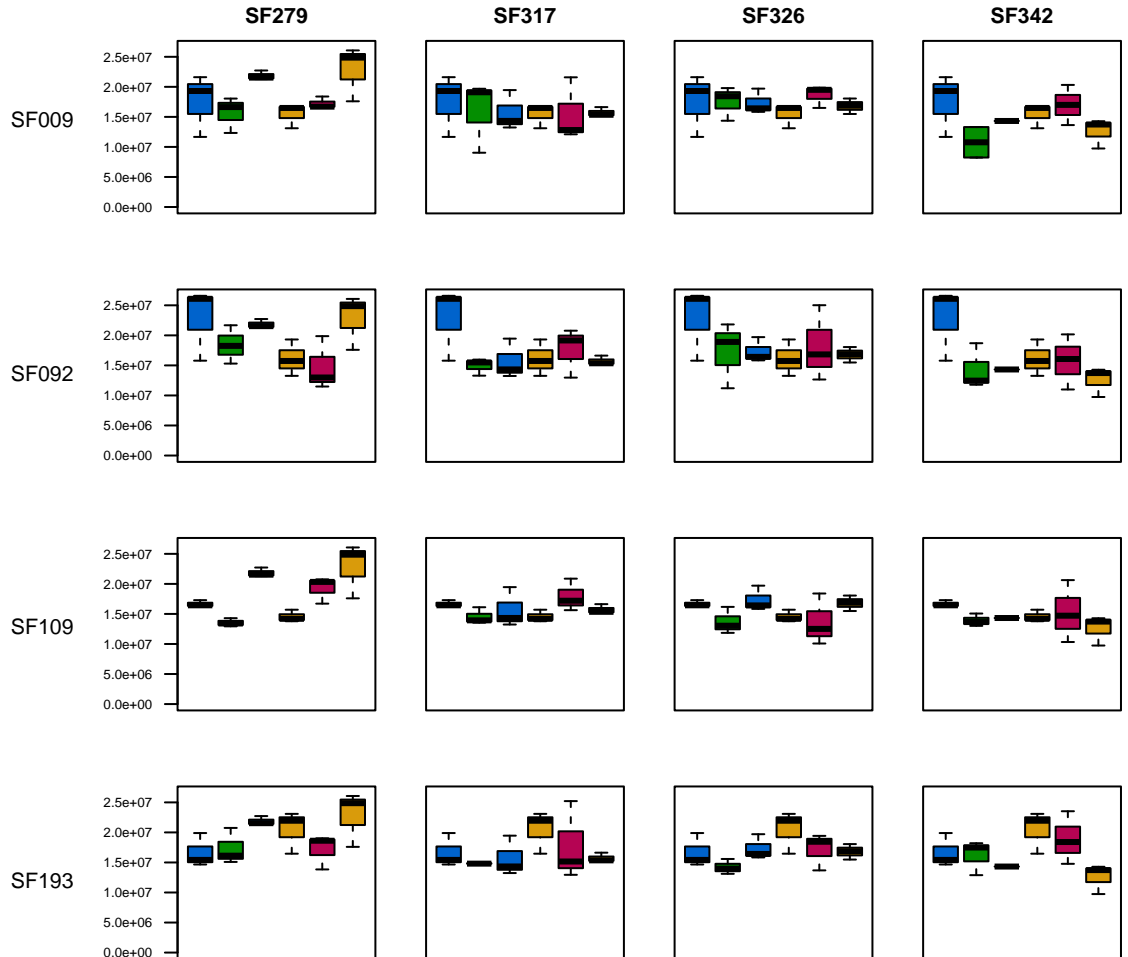

HanXRQChr16g0515251  
 Putative glucose-1-phosphate  
 adenylyltransferase; Nucleotide-diphospho

Parents WW  
 Parents WD  
 Hybrids WW  
 Hybrids WD

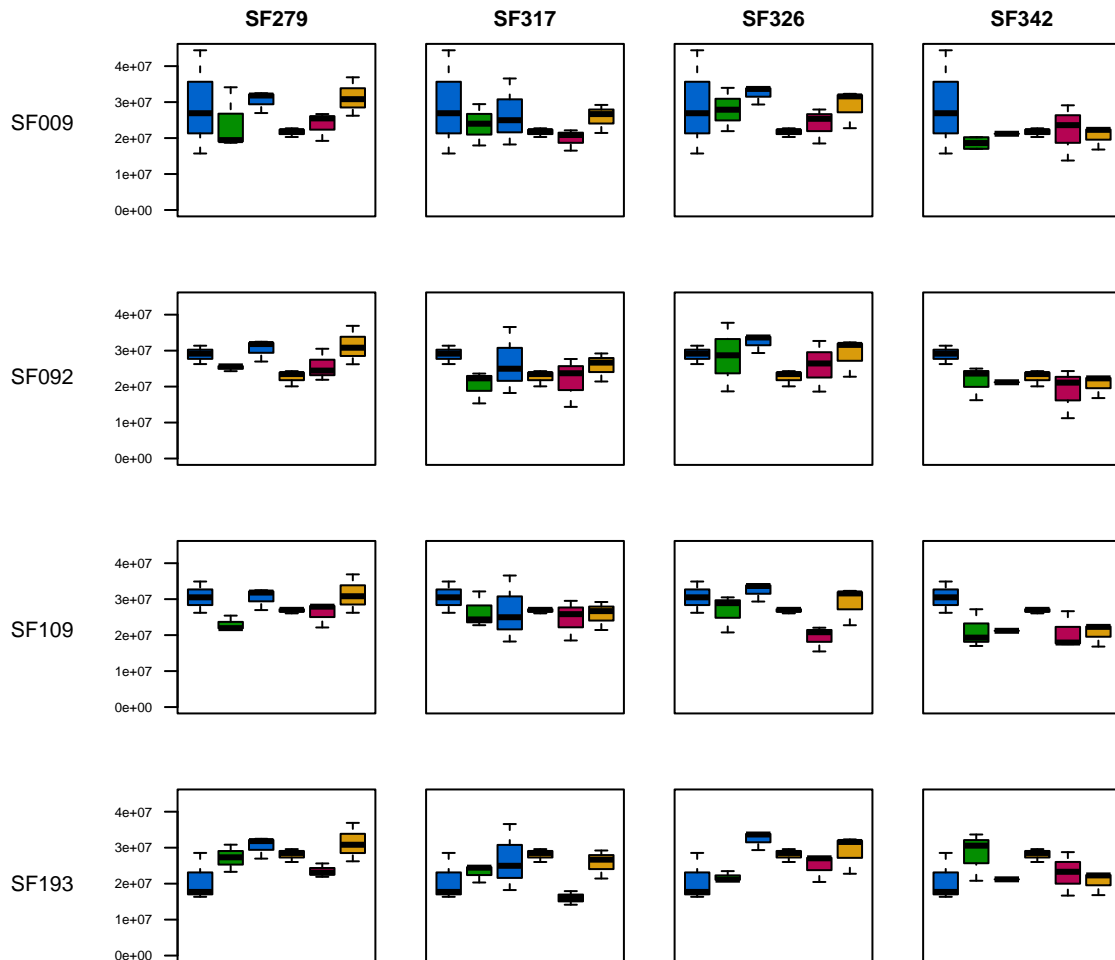

HanXRQChr11g0324441  
Probable serine  
hydroxymethyltransferase 1, mitochondrial

Parents WW  
Parents WD  
Hybrids WW  
Hybrids WD

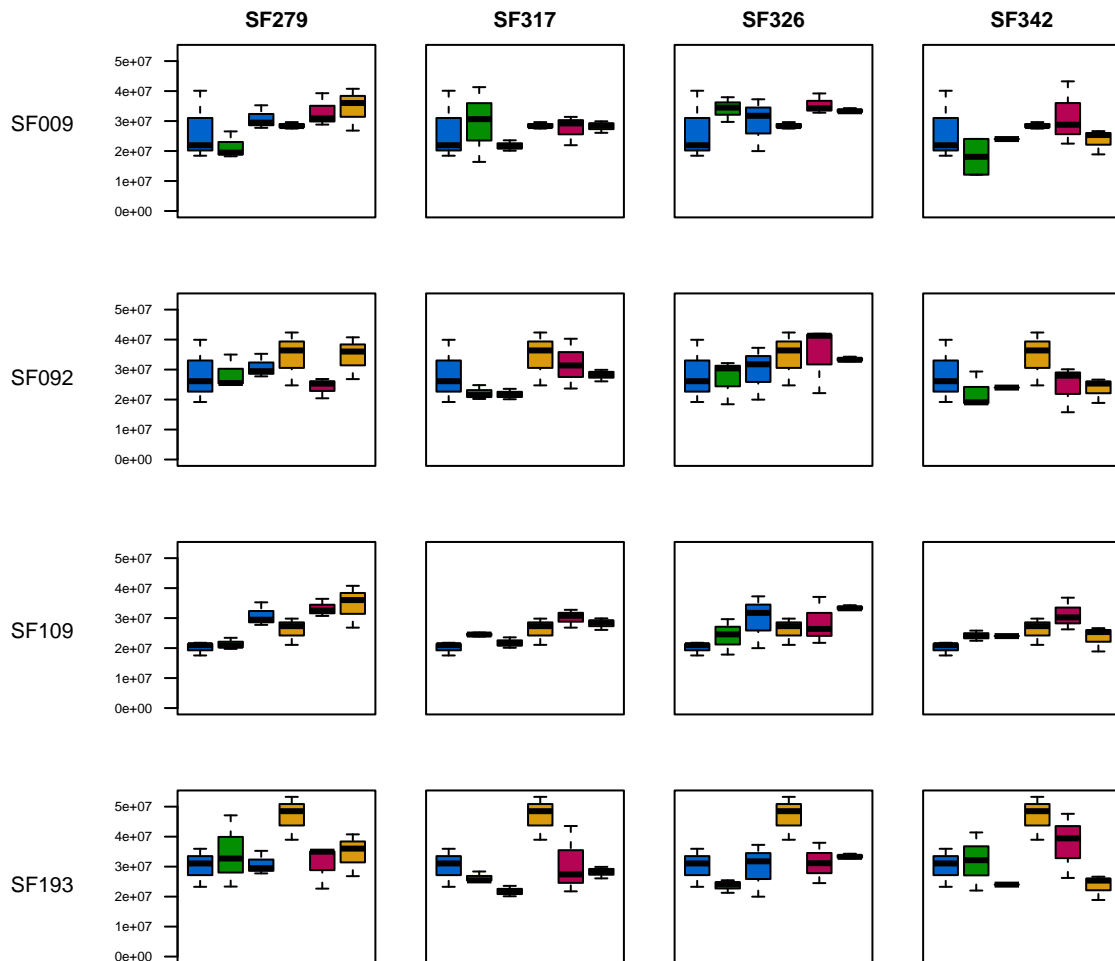

HanXRQChr14g0447101  
 Probable zincin-like metalloproteases  
 family protein

Parents WW  
 Parents WD  
 Hybrids WW  
 Hybrids WD

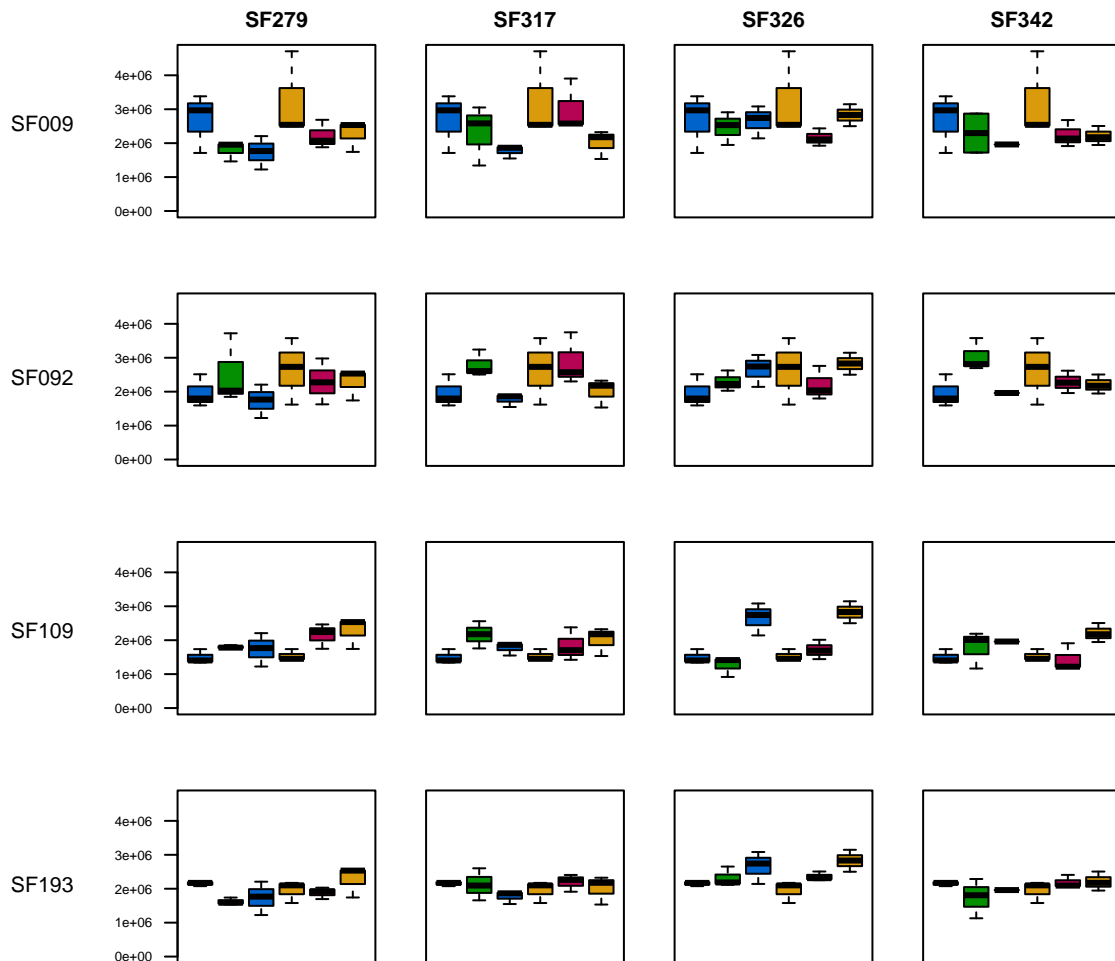



HanXRQChr12g0354331  
Probable artemisinic aldehyde  
Delta(11(13)) reductase

Parents WW  
Parents WD  
Hybrids WW  
Hybrids WD

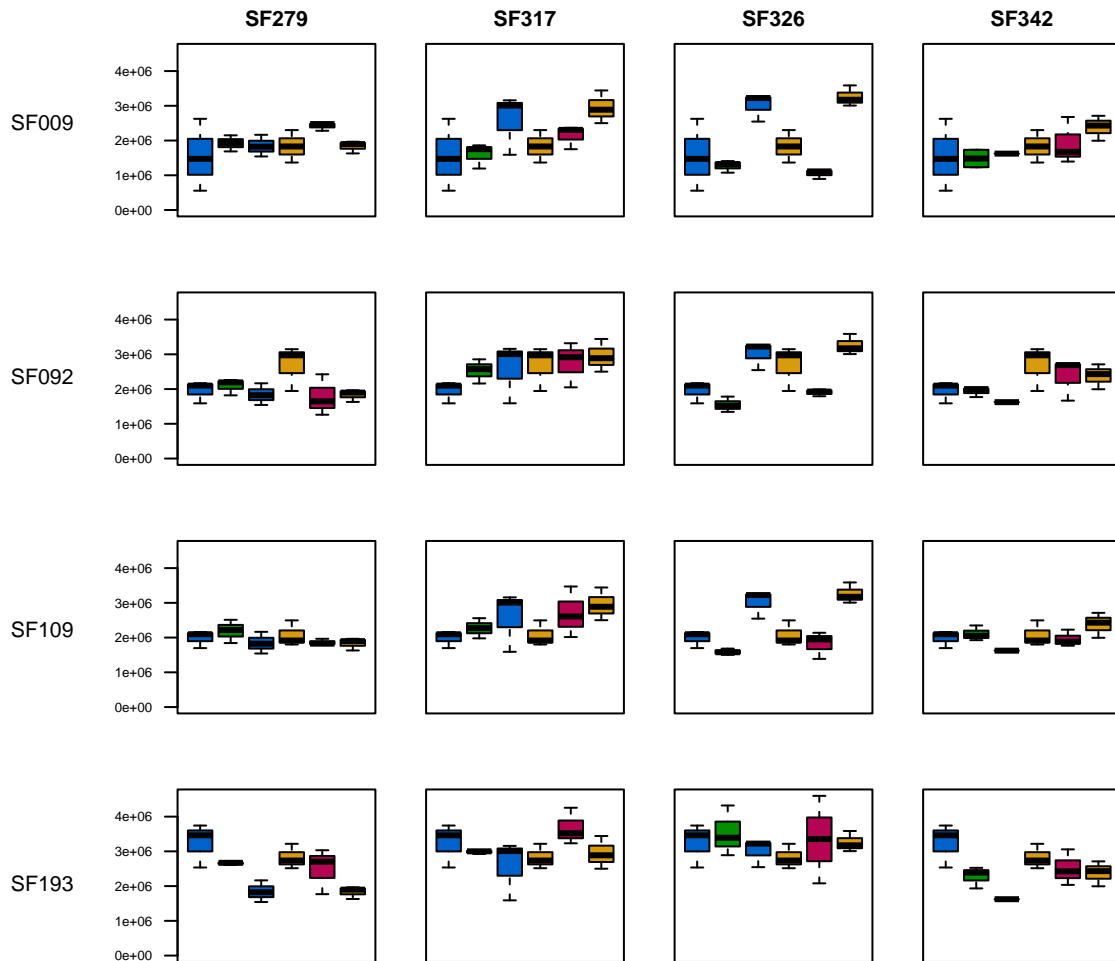

HanXRQChr15g0493261  
 Probable pathogenesis-related thaumatin  
 superfamily protein

■ Parents WW  
 ■ Parents WD  
 ■ Hybrids WW  
 ■ Hybrids WD

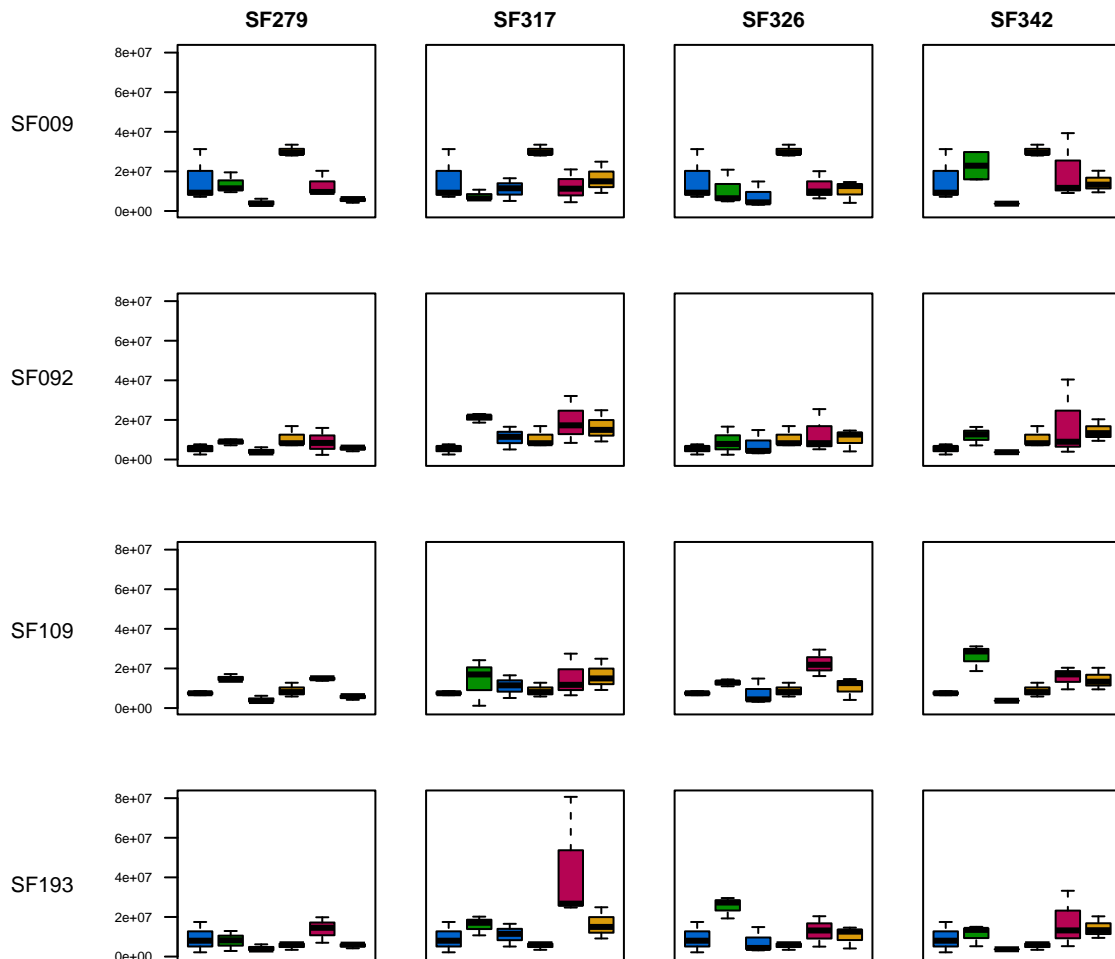

HanXRQChr11g0331711  
Probable CAX-interacting protein 2

Parents WW  
Parents WD  
Hybrids WW  
Hybrids WD

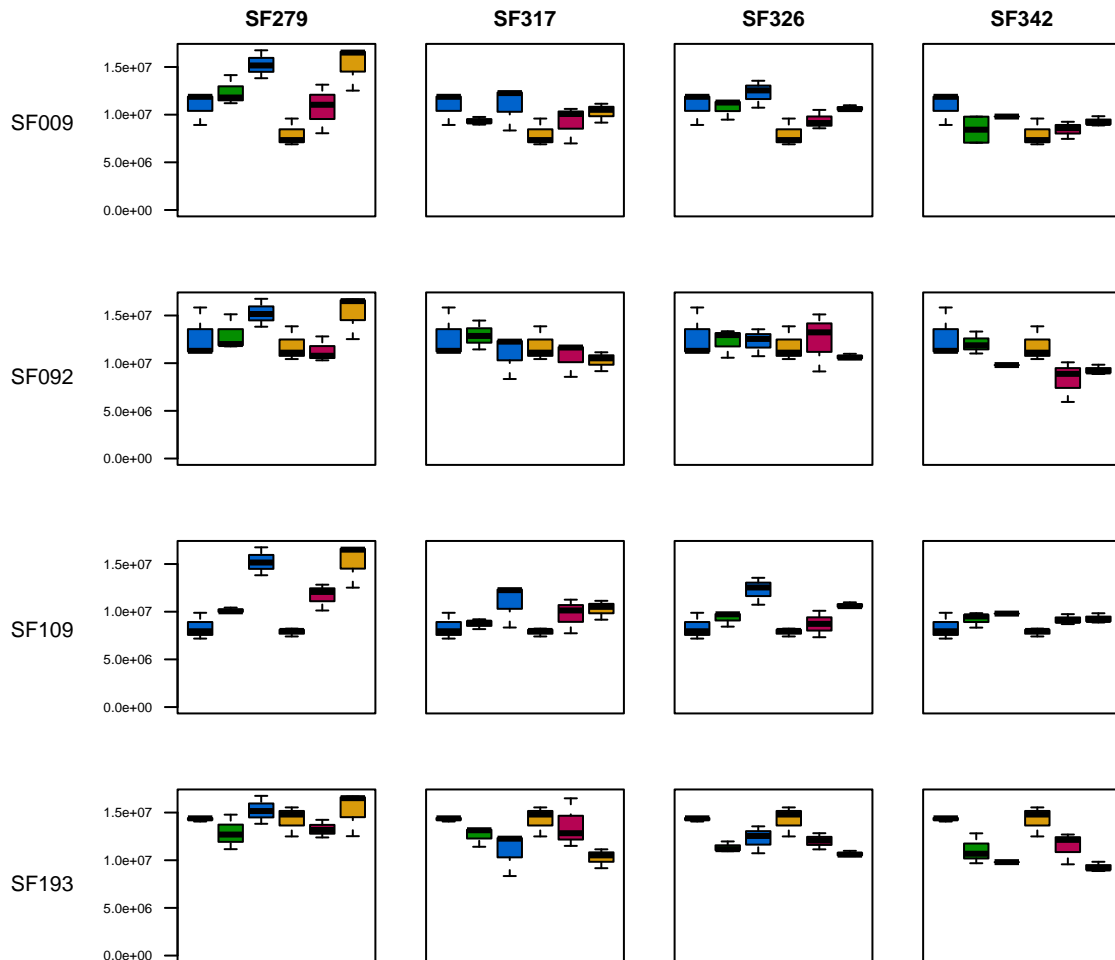

HanXRQChr09g0247831  
Probable 2Fe-2S ferredoxin-like  
superfamily protein

Parents WW  
Parents WD  
Hybrids WW  
Hybrids WD

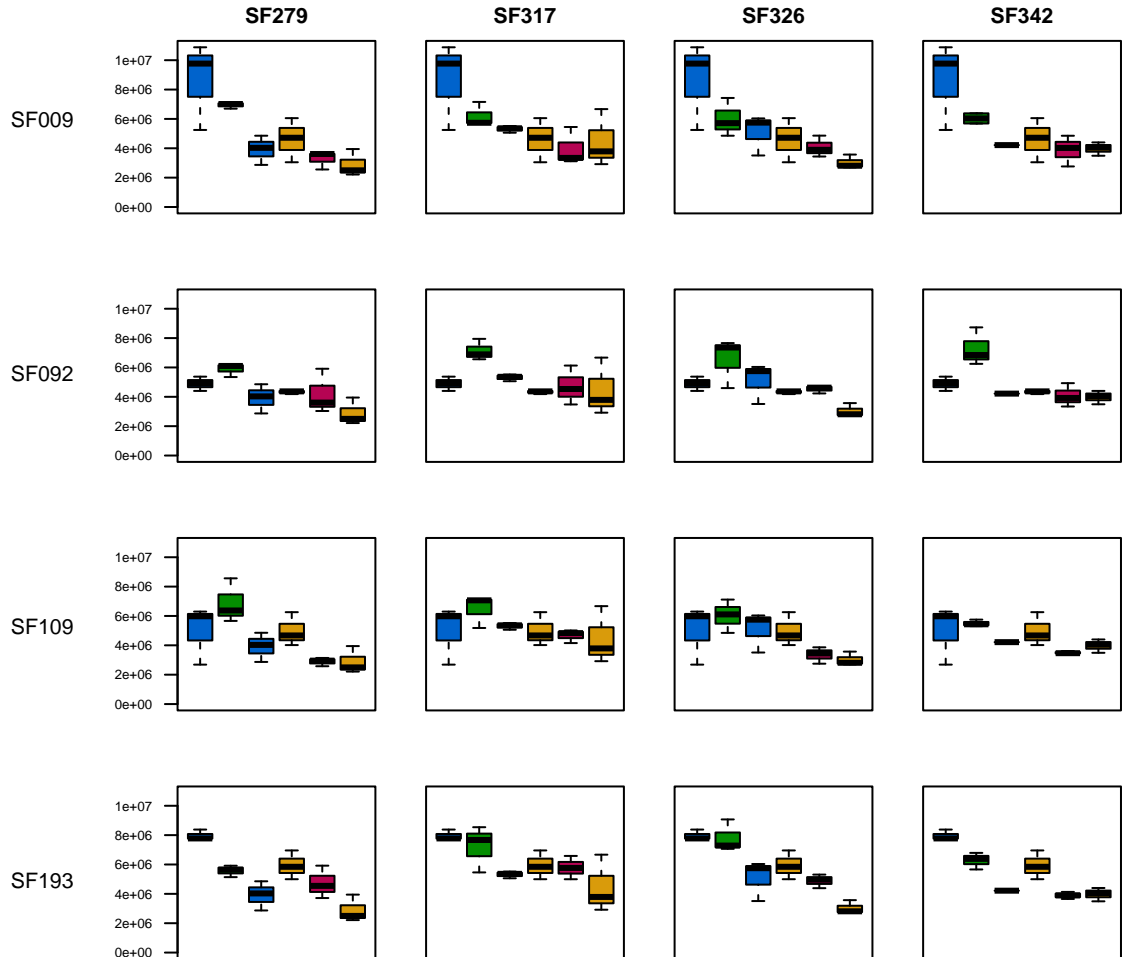

HanXRQChr09g0262071  
 Putative thioredoxin-like fold;  
 Peroxiredoxin-like FAM213/AAED1

■ Parents WW  
 ■ Parents WD  
 ■ Hybrids WW  
 ■ Hybrids WD

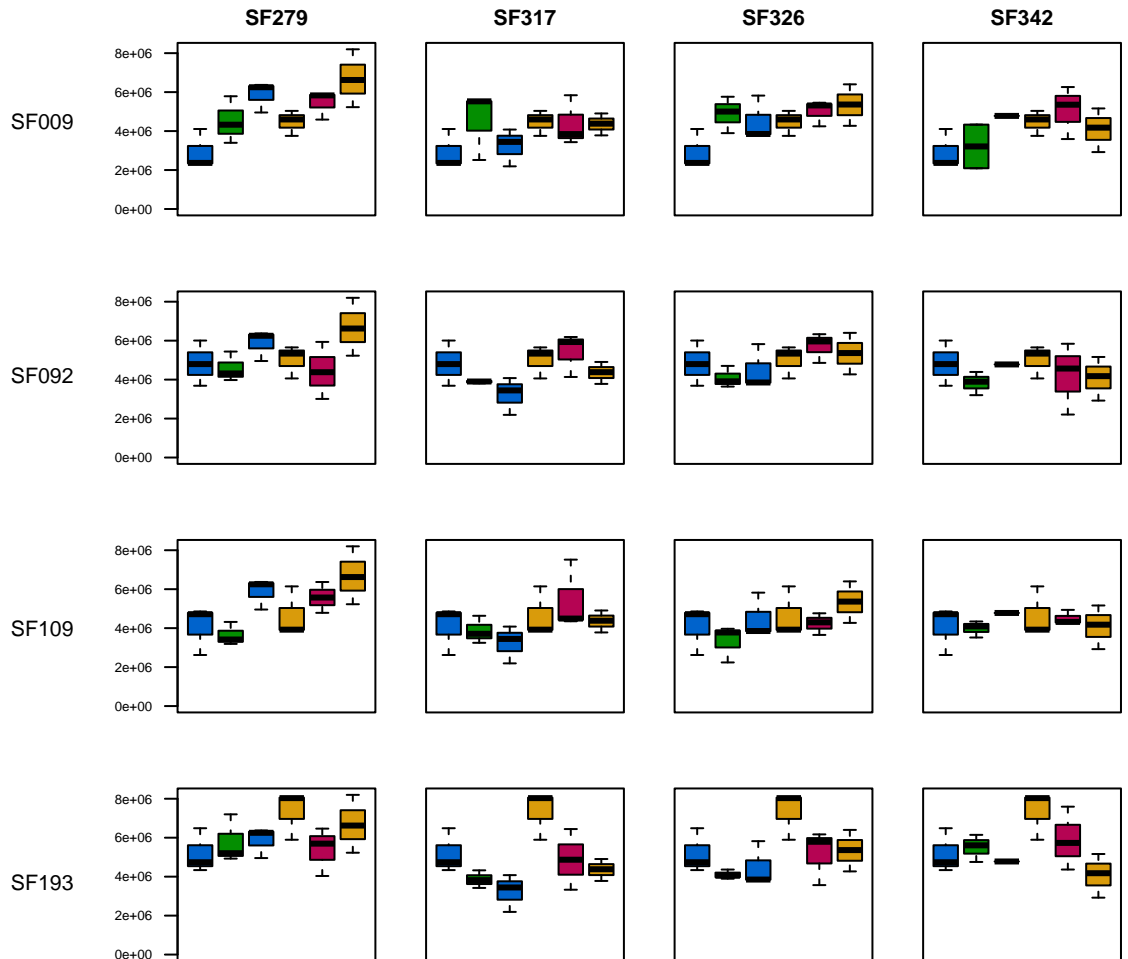

HanXRQChr14g0445541  
 Putative ribosomal protein L4/L1e;  
 Ribosomal protein L4 domain; 60S ribosom

Parents WW  
 Parents WD  
 Hybrids WW  
 Hybrids WD

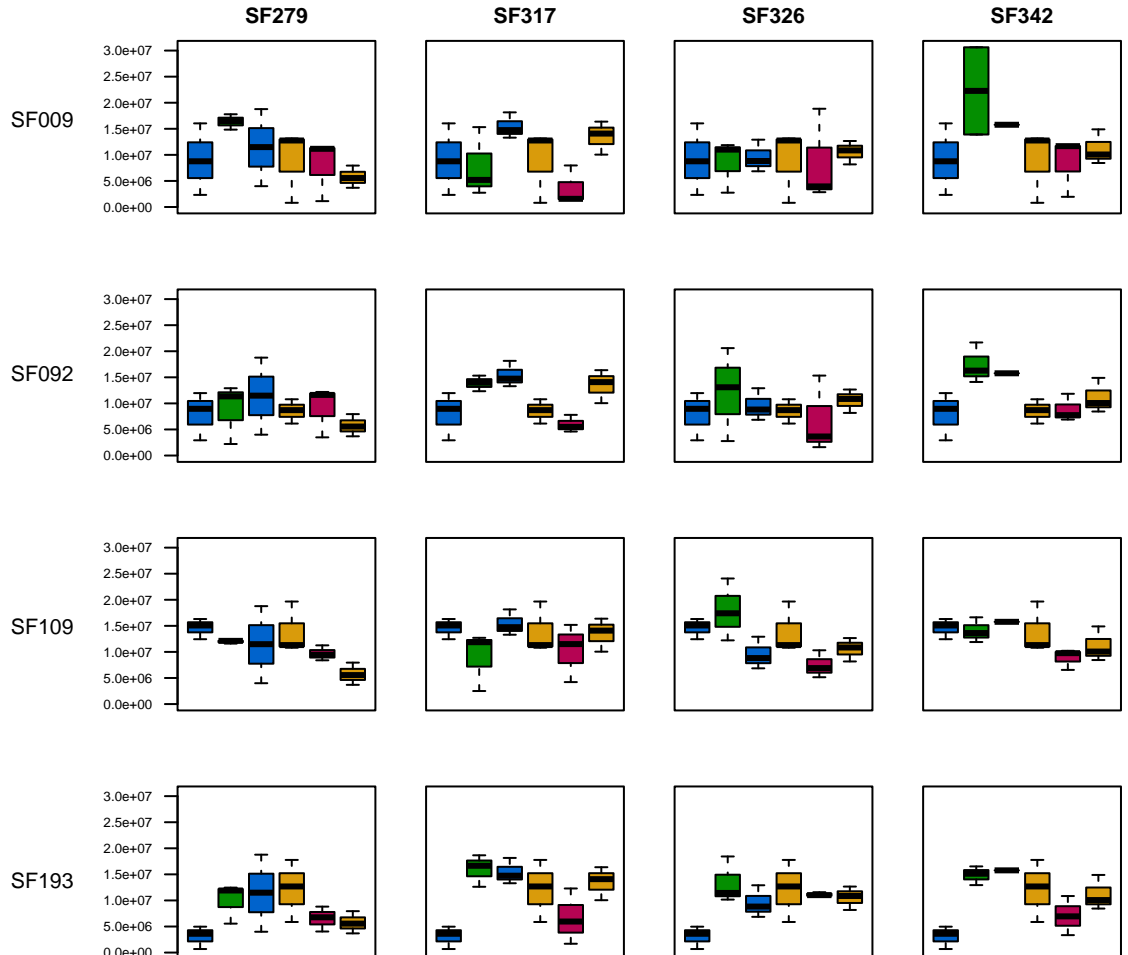

HanXRQChr10g0277881  
Putative cytochrome c oxidase, subunit  
VIb

Parents WW  
Parents WD  
Hybrids WW  
Hybrids WD

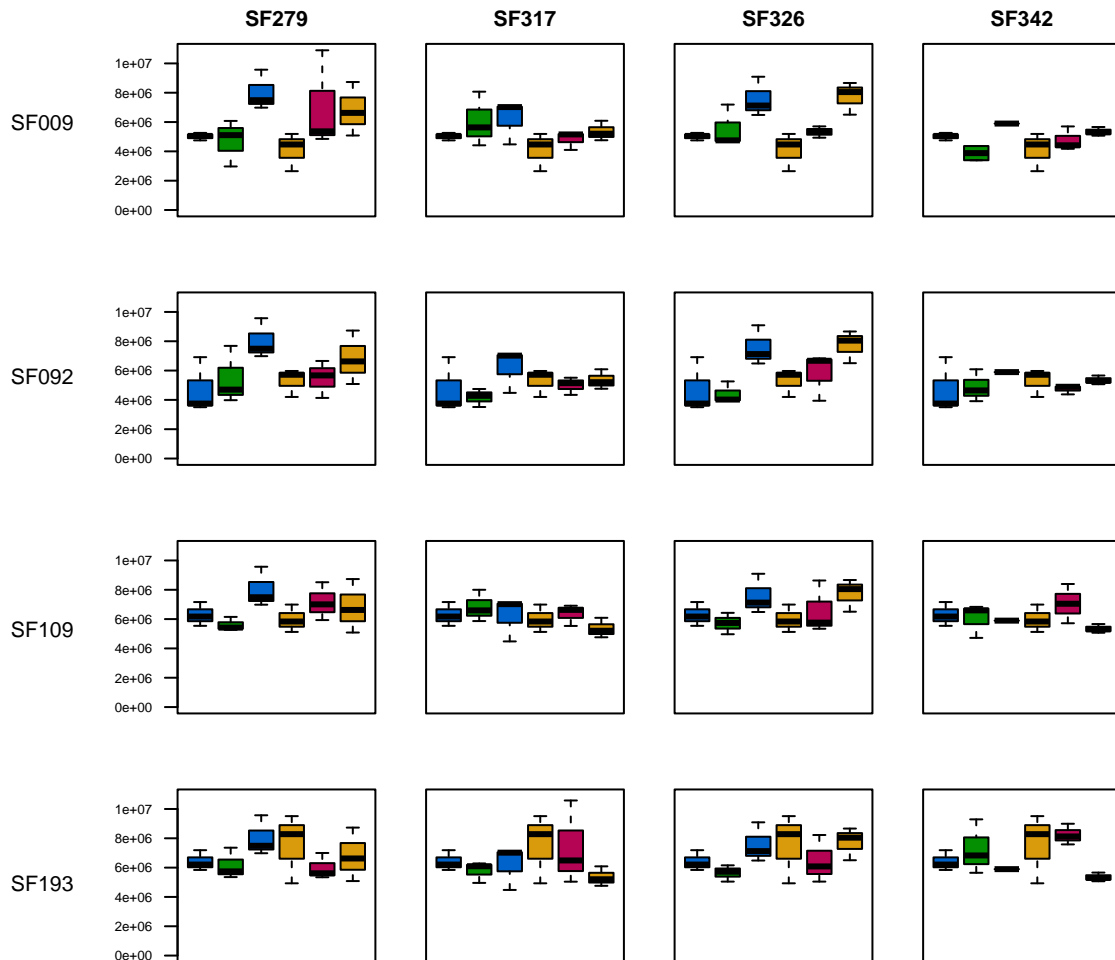

HanXRQChr04g0115371  
Probable cyanate hydratase

Parents WW  
Parents WD  
Hybrids WW  
Hybrids WD

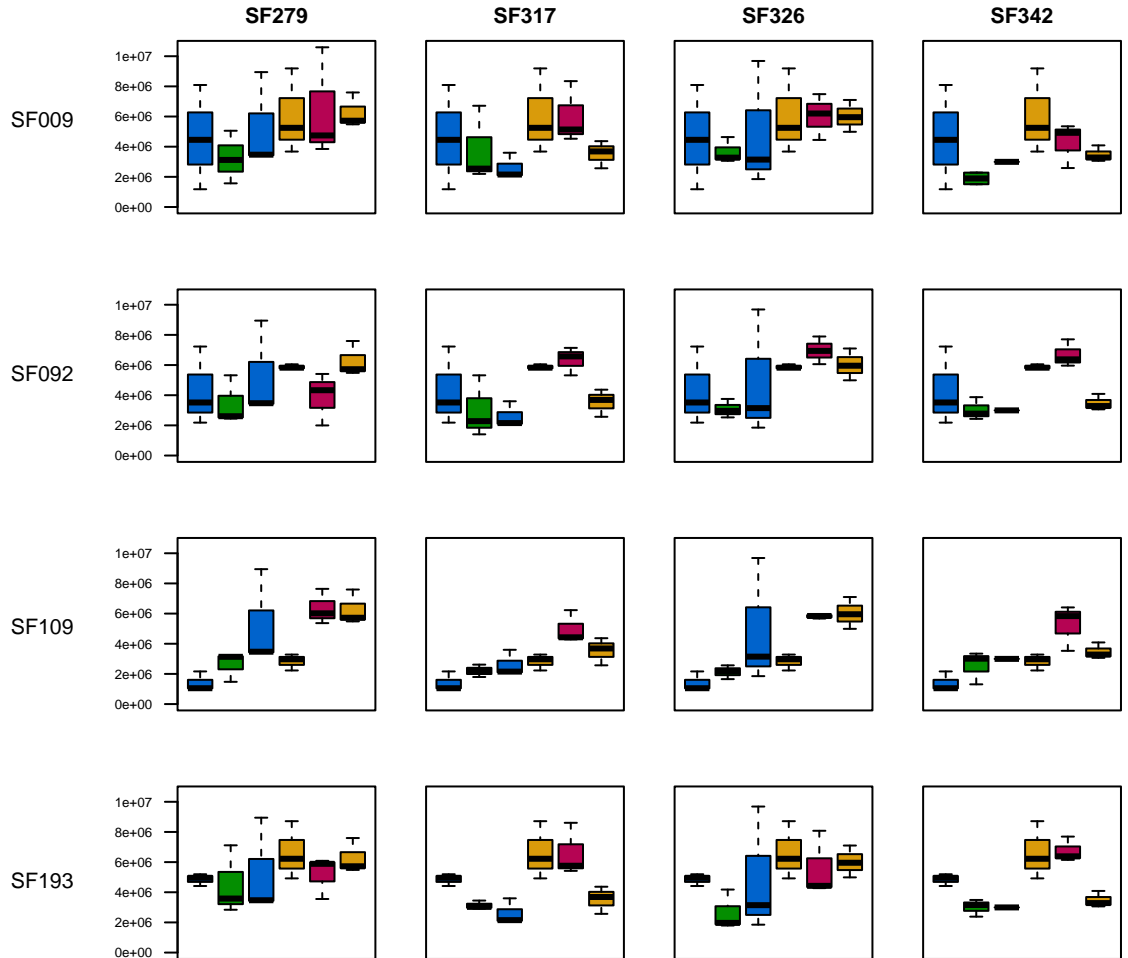



HanXRQChr09g0246191  
Probable HOPW1-1-interacting 2

Parents WW  
Parents WD  
Hybrids WW  
Hybrids WD

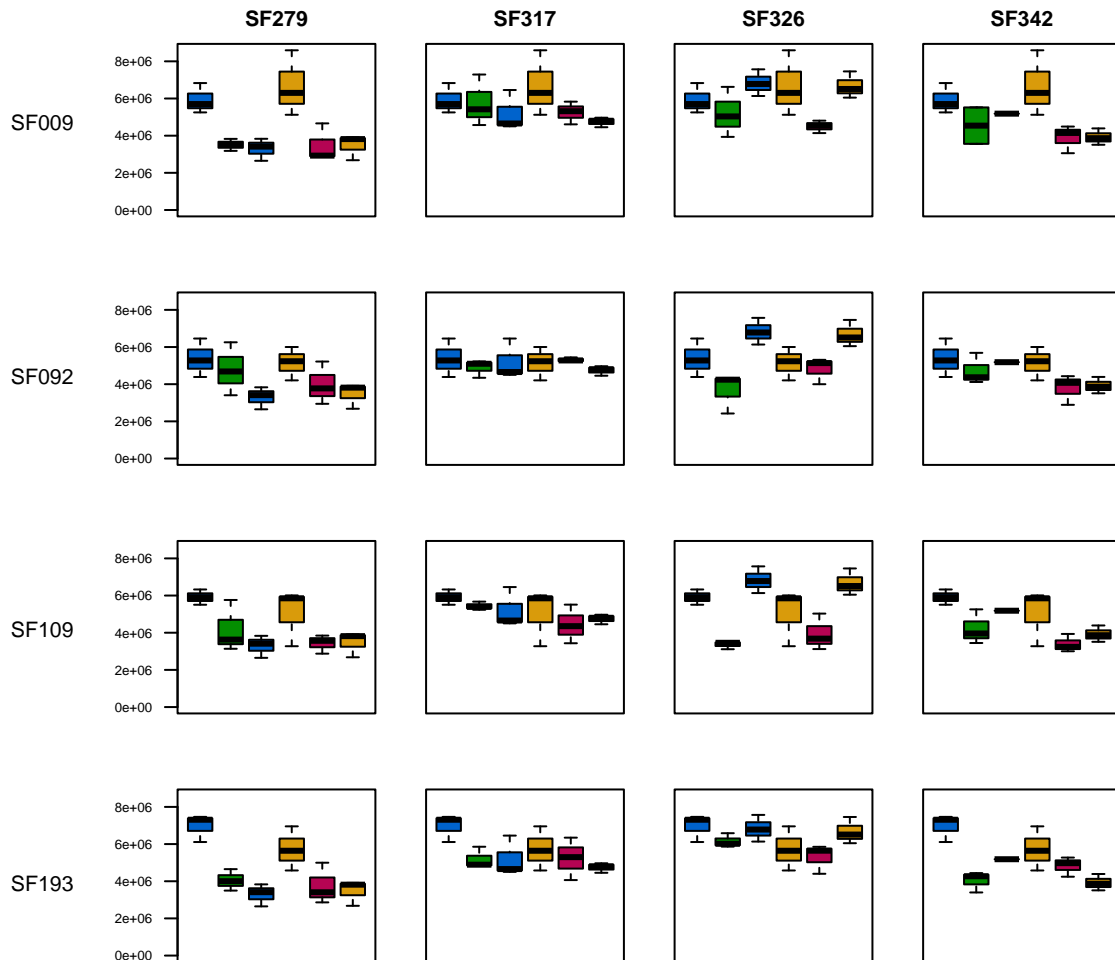

HanXRQChr08g0231021  
Probable translocase of the outer  
mitochondrial membrane 40

Parents WW  
Parents WD  
Hybrids WW  
Hybrids WD

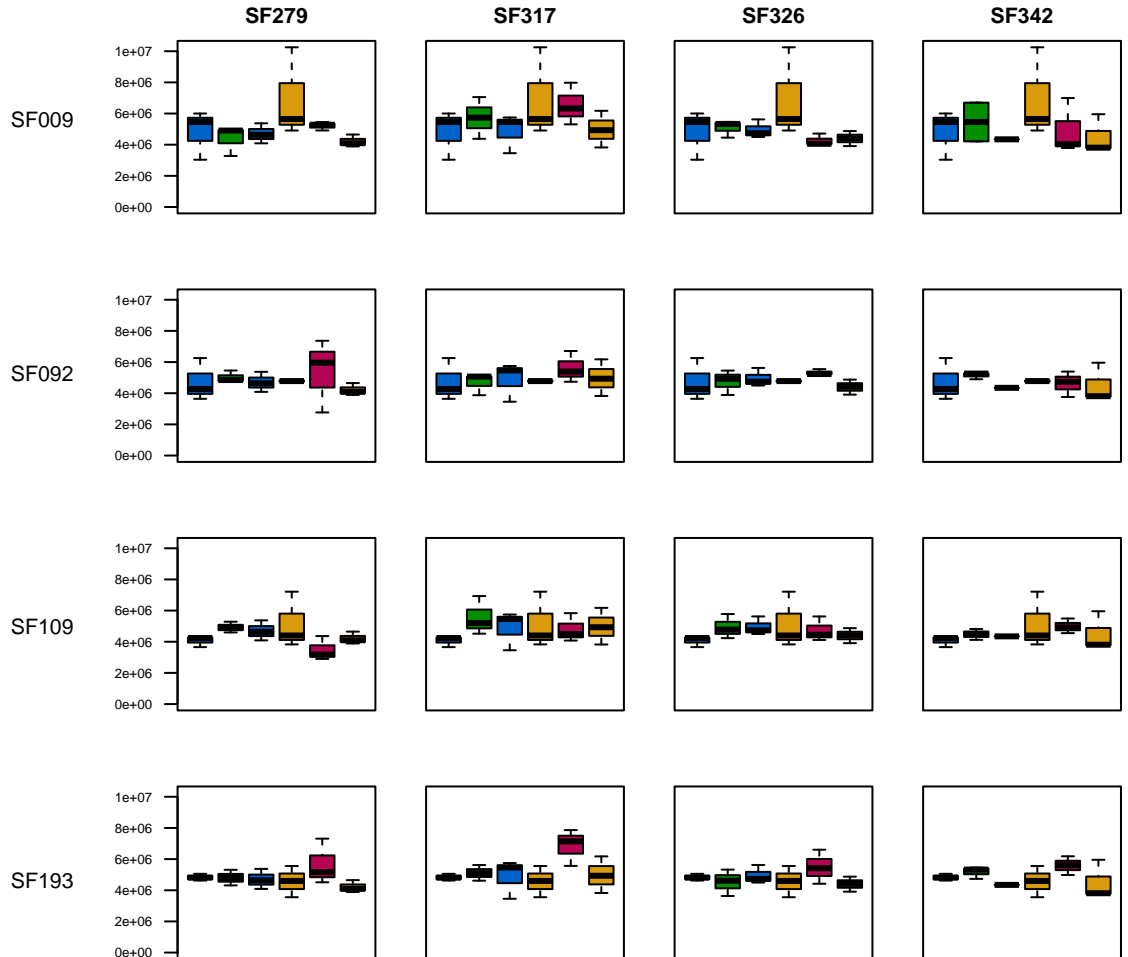

HanXRQChr04g0102641  
Putative nitrite reductase [NAD(P)H]  
small subunit, NirD; Chlorophyll a/b binding

Parents WW  
Parents WD  
Hybrids WW  
Hybrids WD

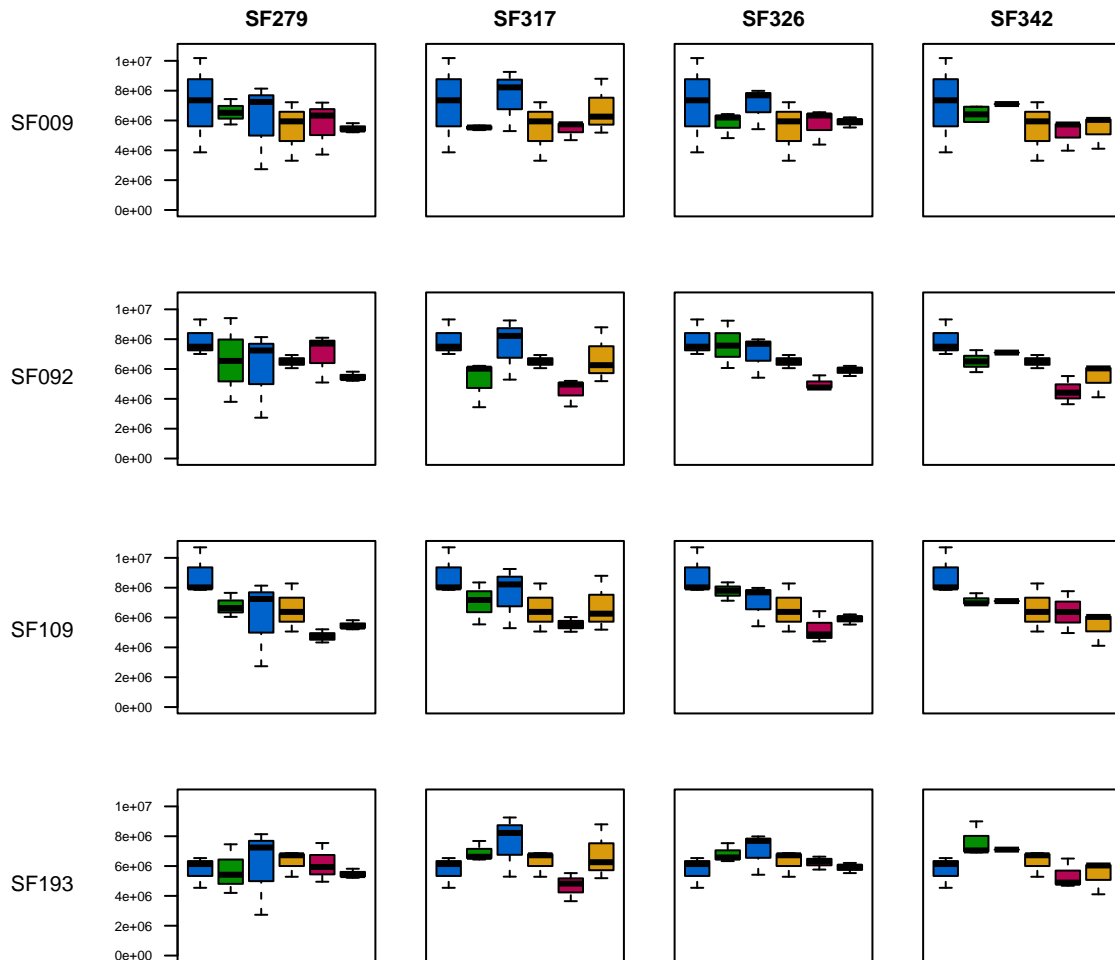

HanXRQChr17g0544921  
Probable photosystem II  
stability/assembly factor HCF136, chloropla

Parents WW  
Parents WD  
Hybrids WW  
Hybrids WD

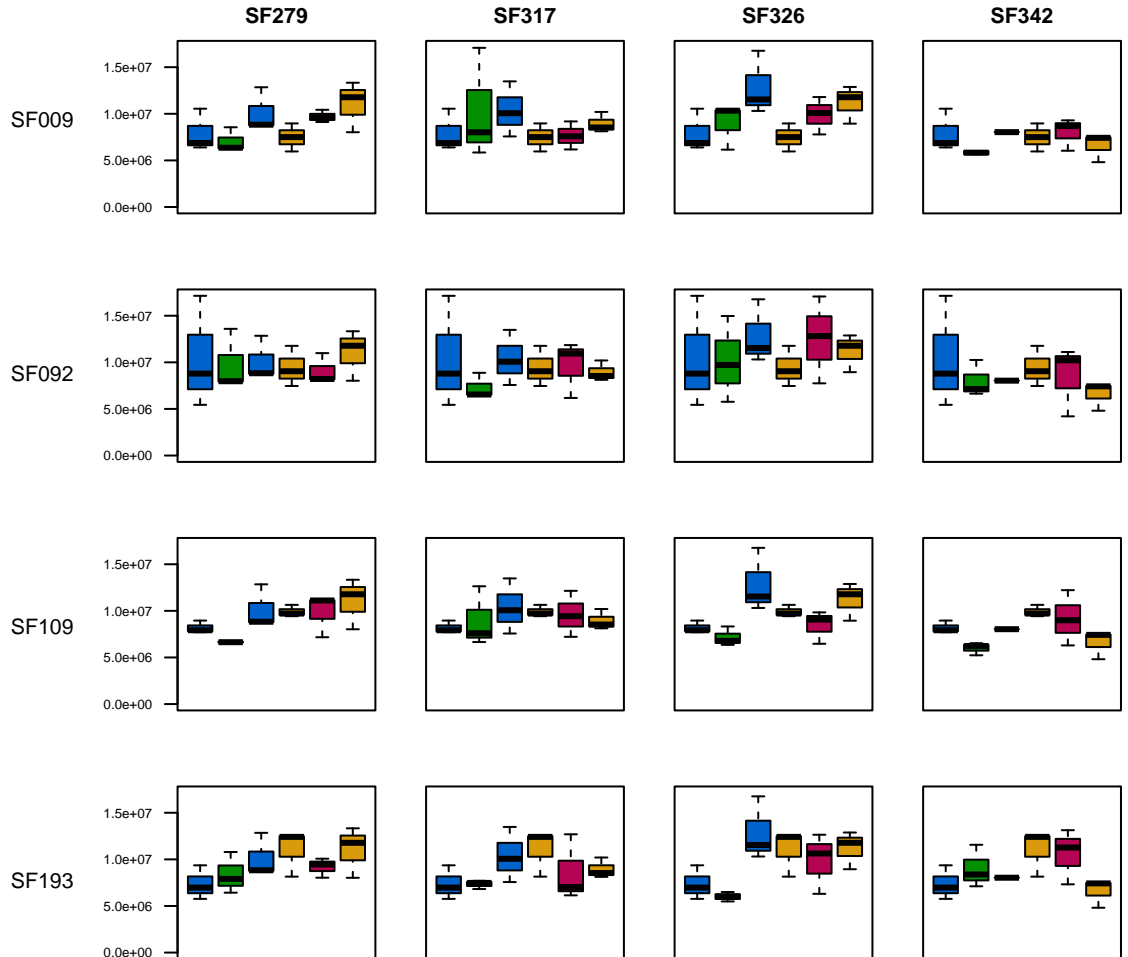

HanXRQChr17g0567081  
 Putative ATPase, F1 complex, beta  
 subunit; ATPase, F1 complex beta subunit/\

Parents WW  
 Parents WD  
 Hybrids WW  
 Hybrids WD

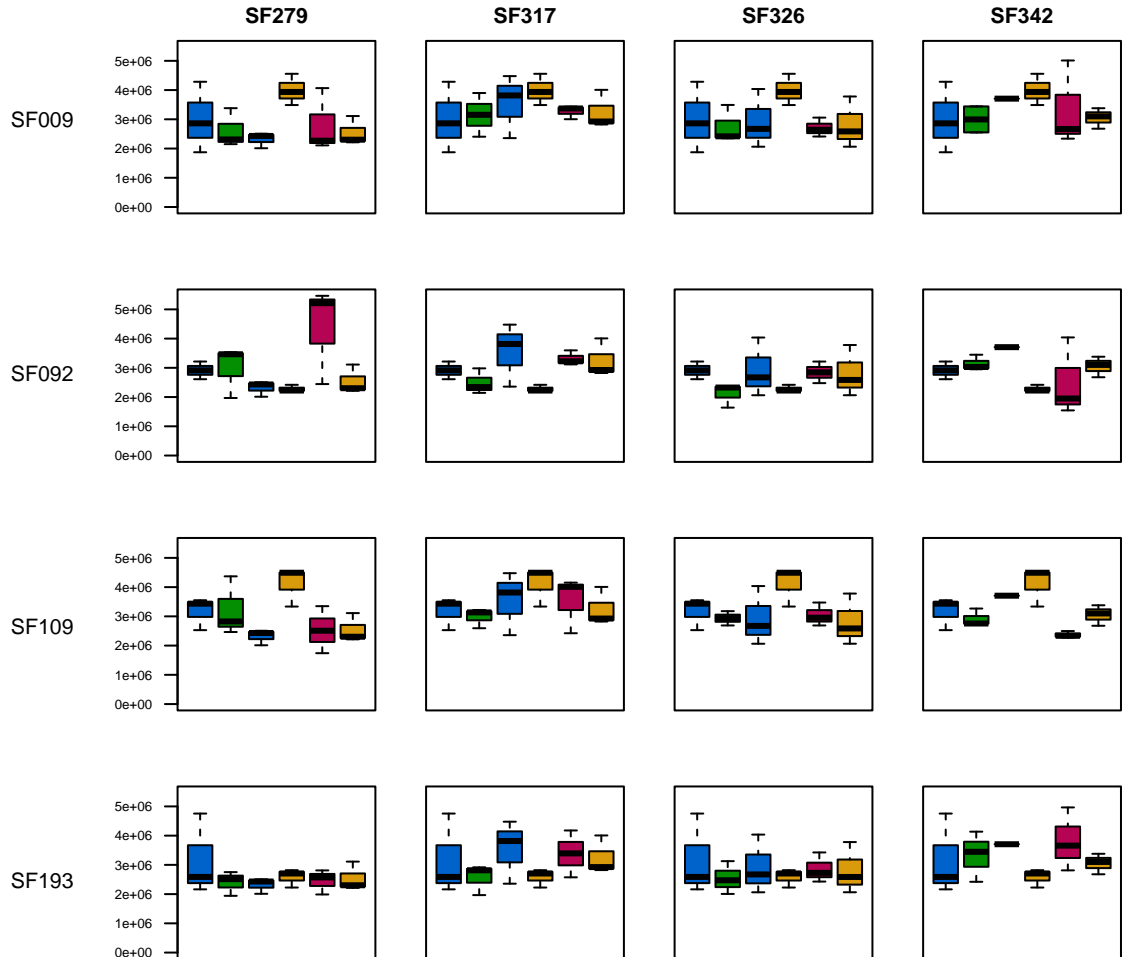

HanXRQChr15g0488011  
Probable fructose-bisphosphate  
aldolase, cytoplasmic isozyme 1

Parents WW  
Parents WD  
Hybrids WW  
Hybrids WD

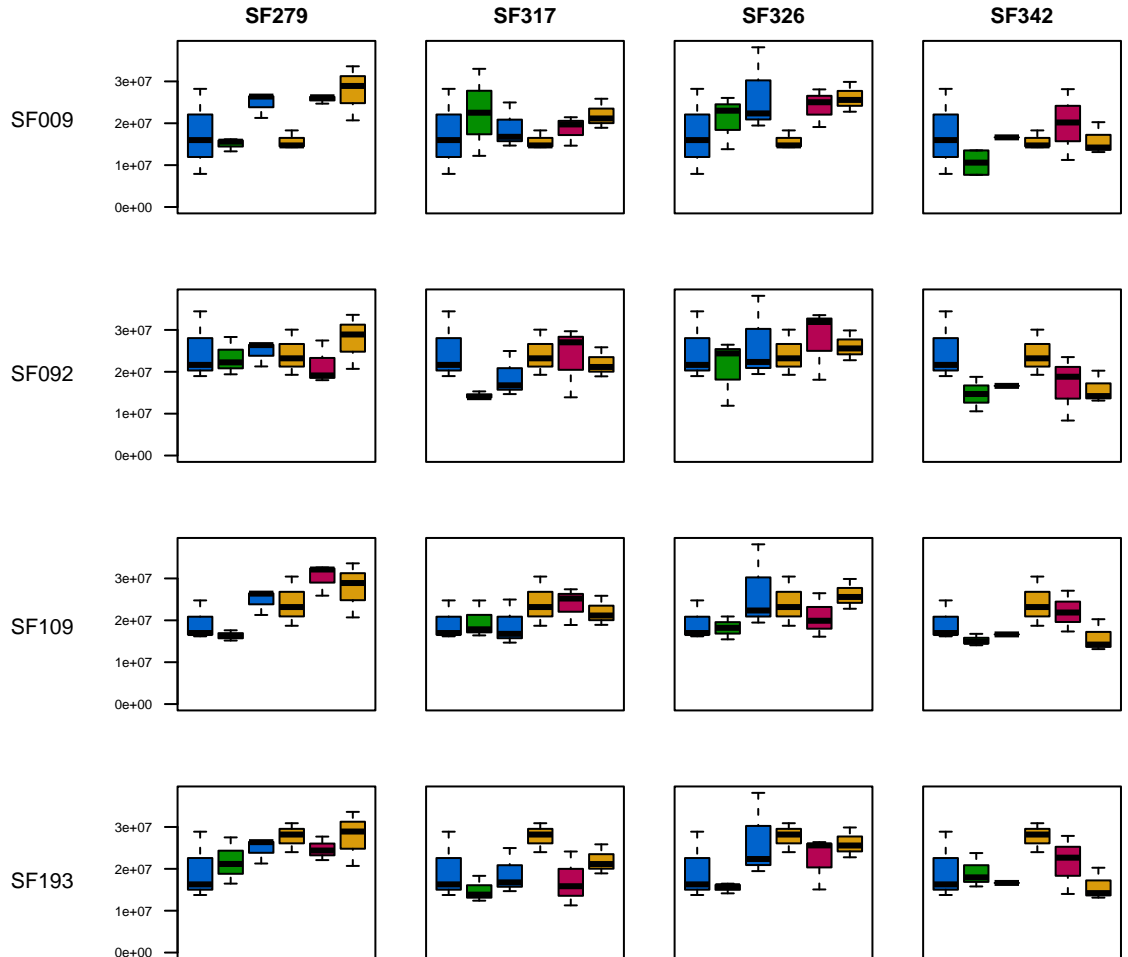

HanXRQChr15g0495261  
Probable phosphoenolpyruvate carboxylase

Parents WW  
Parents WD  
Hybrids WW  
Hybrids WD

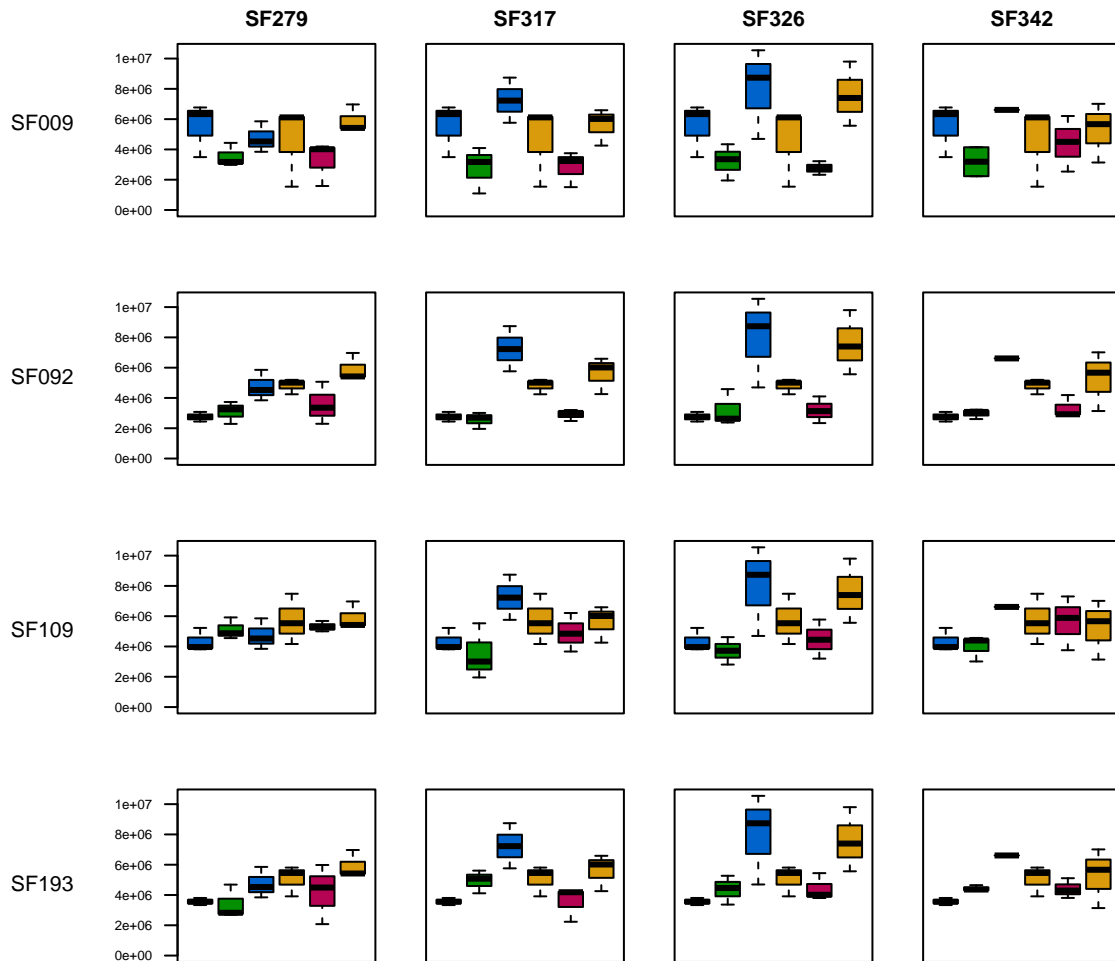

HanXRQChr15g0487661  
Probable glutaredoxin

Parents WW  
Parents WD  
Hybrids WW  
Hybrids WD

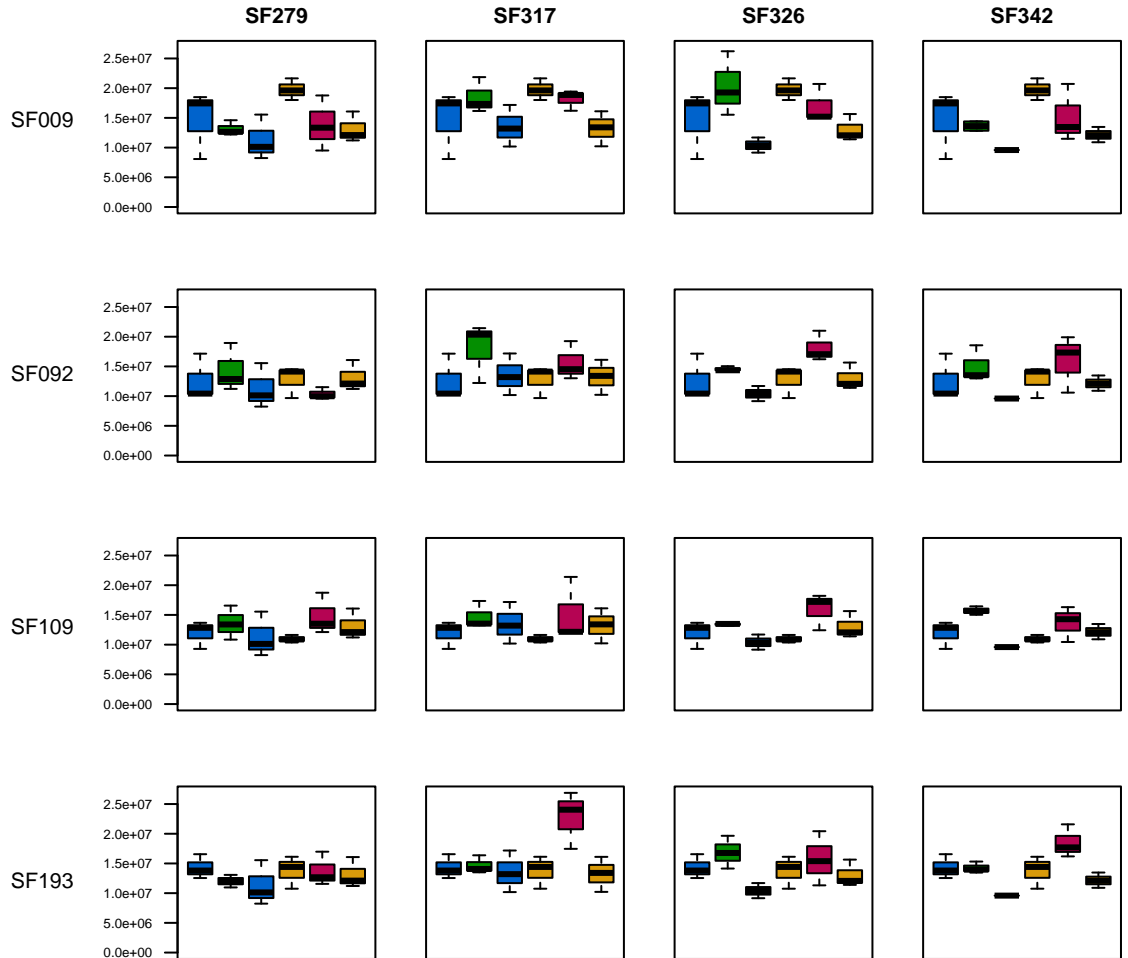



HanXRQChr16g0529301  
Putative glycoside hydrolase family 31;  
Galactose mutarotase-like domain; Glycosyl

Parents WW  
Parents WD  
Hybrids WW  
Hybrids WD

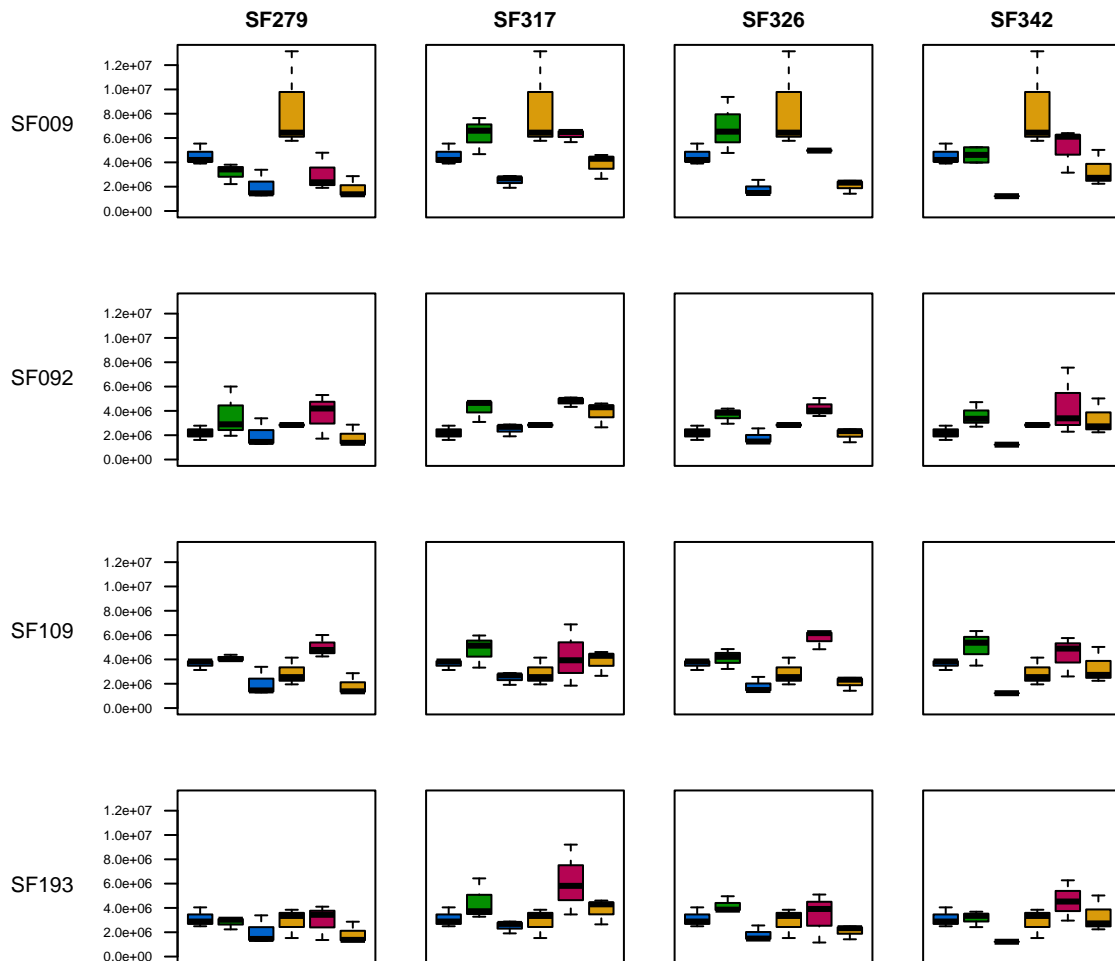

HanXRQChr03g0075061  
 Probable FASCICLIN-like arabinogalactan  
 2

Parents WW  
 Parents WD  
 Hybrids WW  
 Hybrids WD

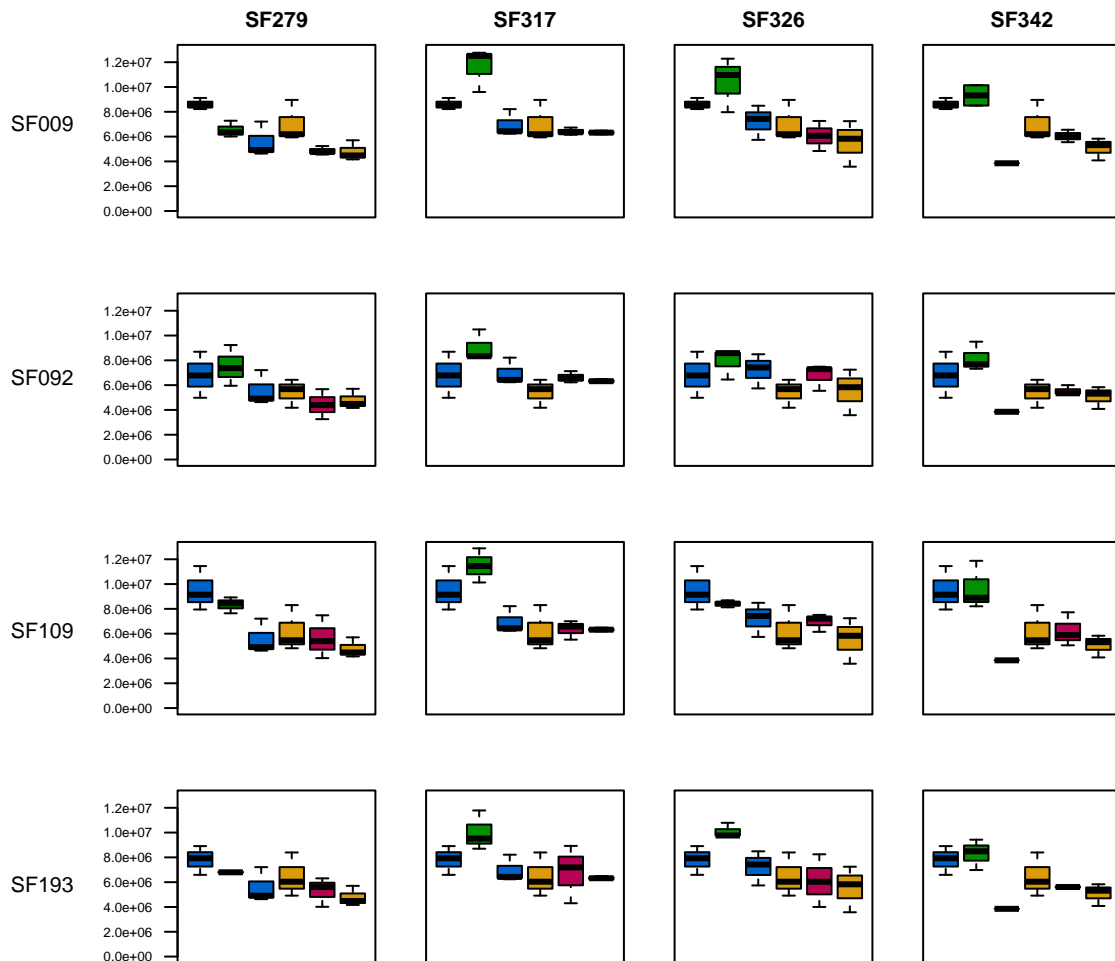

HanXRQChr13g0426481  
Probable pyruvate dehydrogenase E1 alpha

Parents WW  
Parents WD  
Hybrids WW  
Hybrids WD

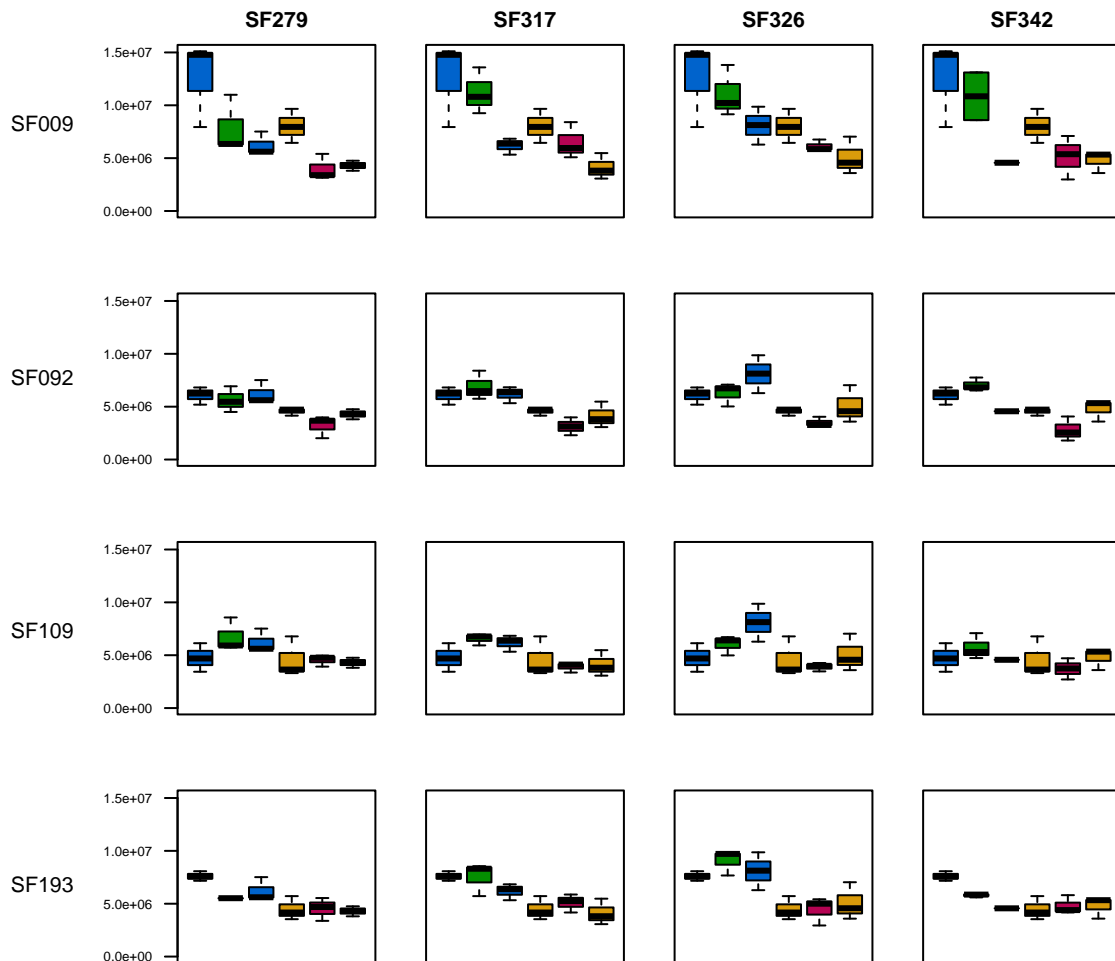

HanXRQChr16g0528561  
Putative  
N-acetyl-γ-glutamyl-phosphate red

Parents WW  
Parents WD  
Hybrids WW  
Hybrids WD

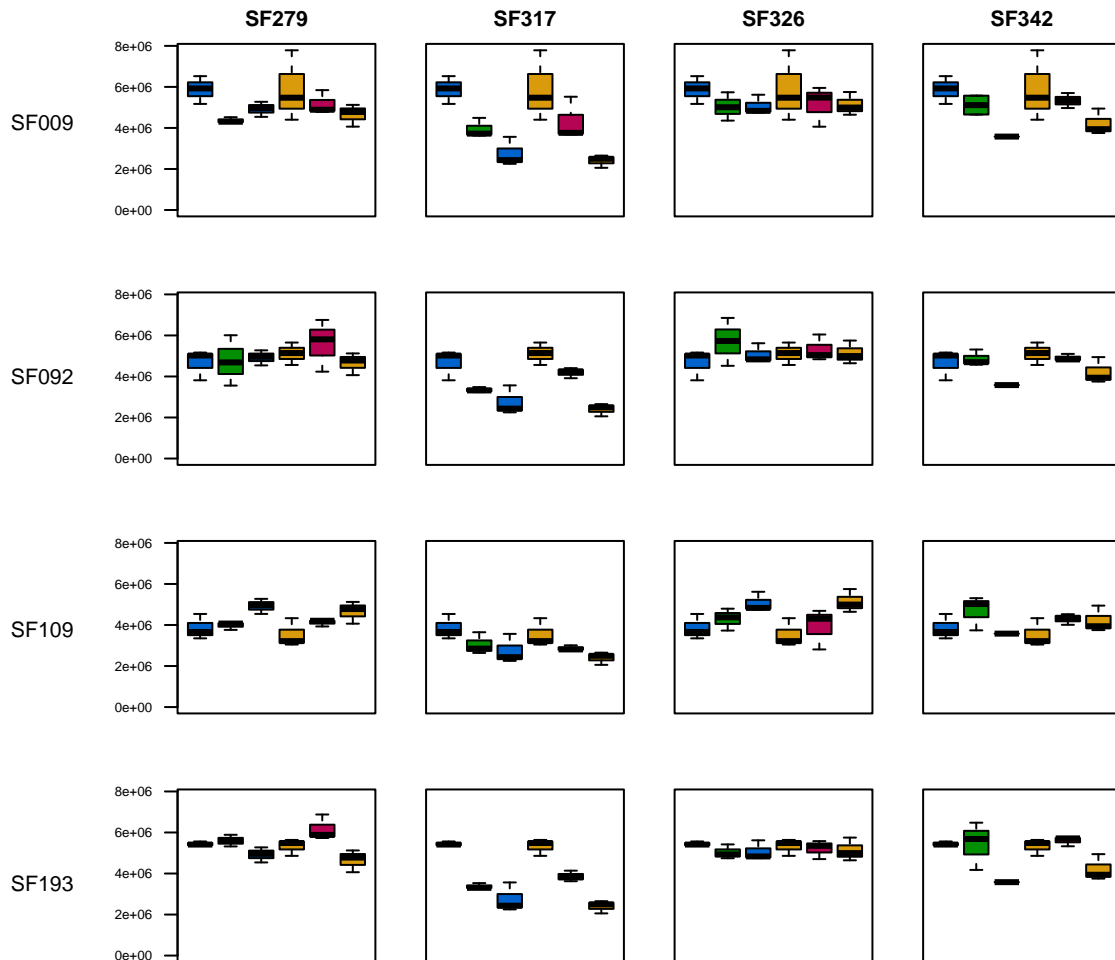

HanXRQChr07g0206791  
Probable groES-like zinc-binding  
alcohol dehydrogenase family protein

Parents WW  
Parents WD  
Hybrids WW  
Hybrids WD

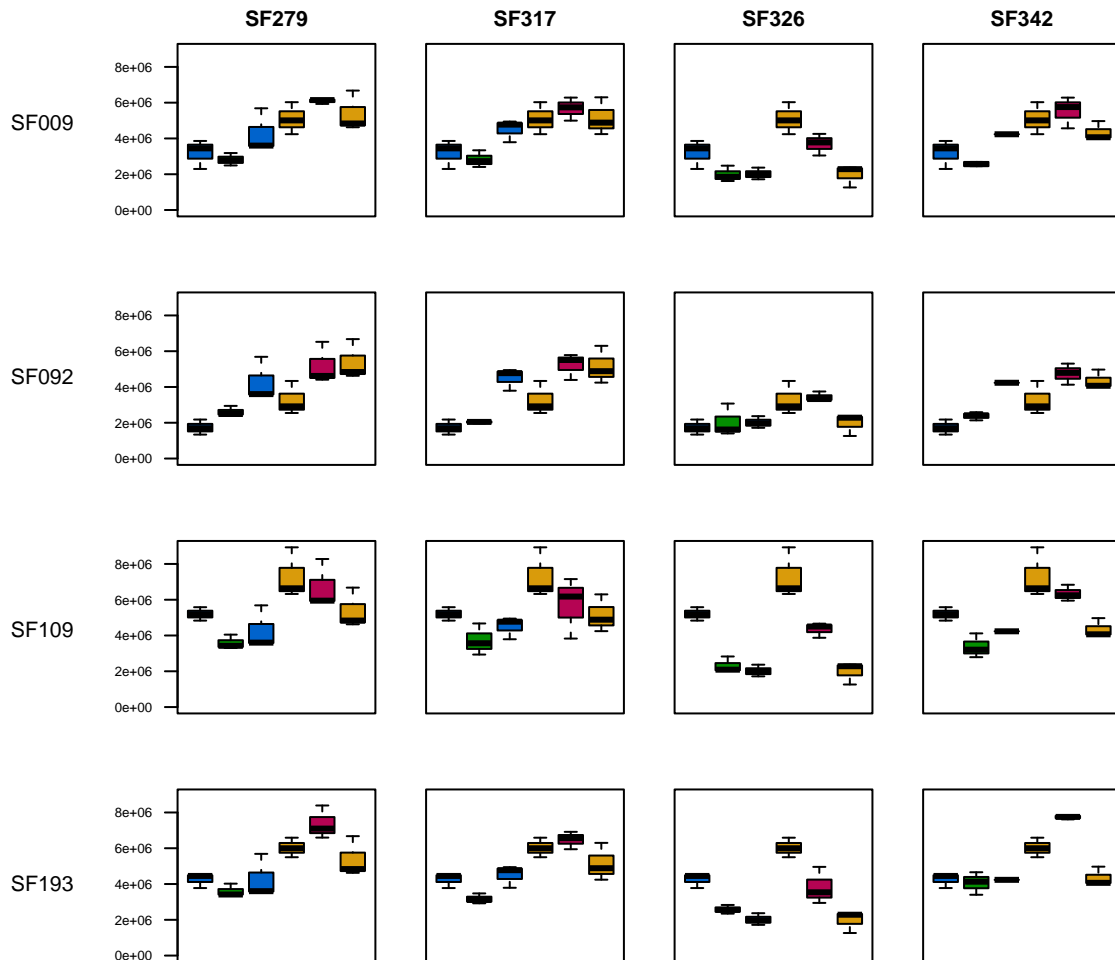

HanXRQChr09g0245691  
Putative ribosomal protein S15;  
Ribosomal protein S13/S15, N-terminal

Parents WW  
Parents WD  
Hybrids WW  
Hybrids WD

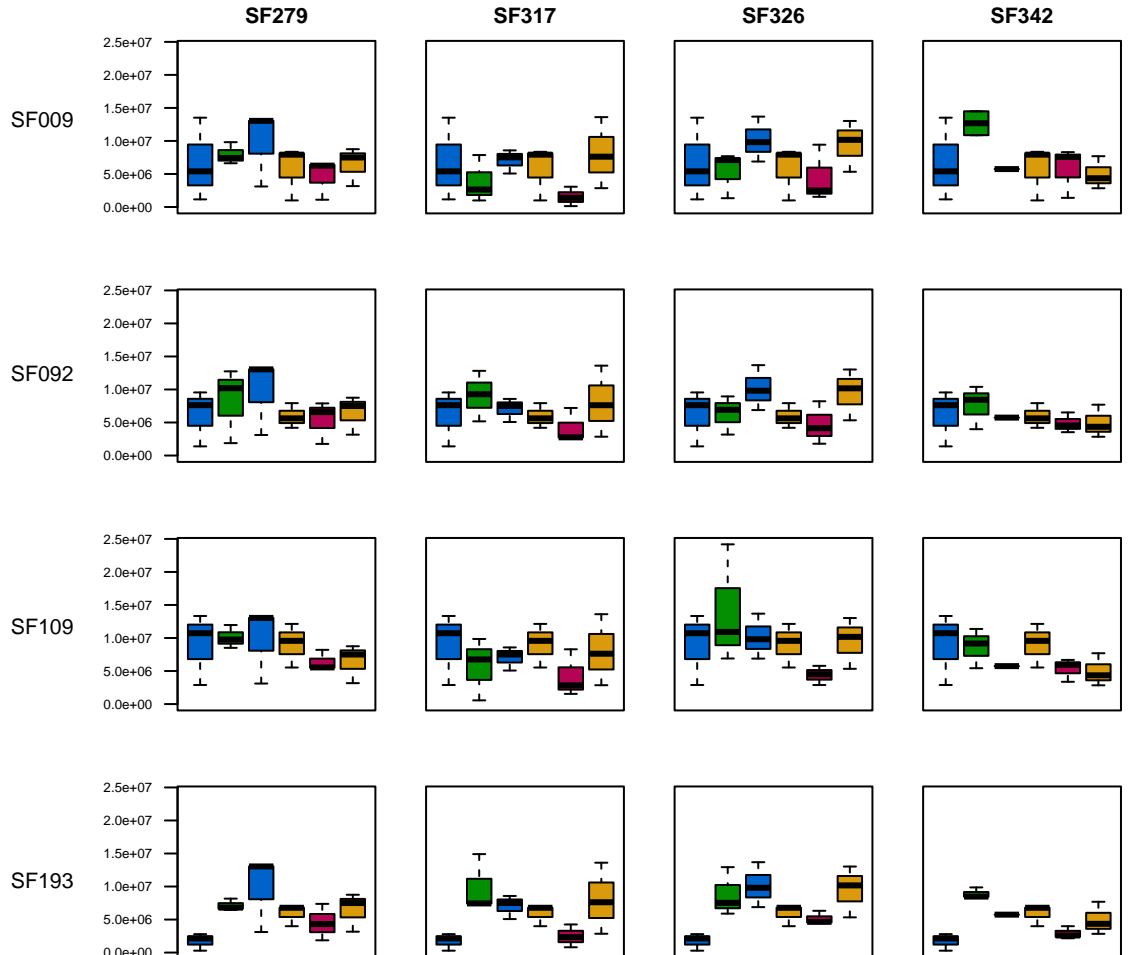

HanXRQChr15g0492411  
 Probable photosystem I light harvesting  
 complex gene 3

Parents WW  
 Parents WD  
 Hybrids WW  
 Hybrids WD

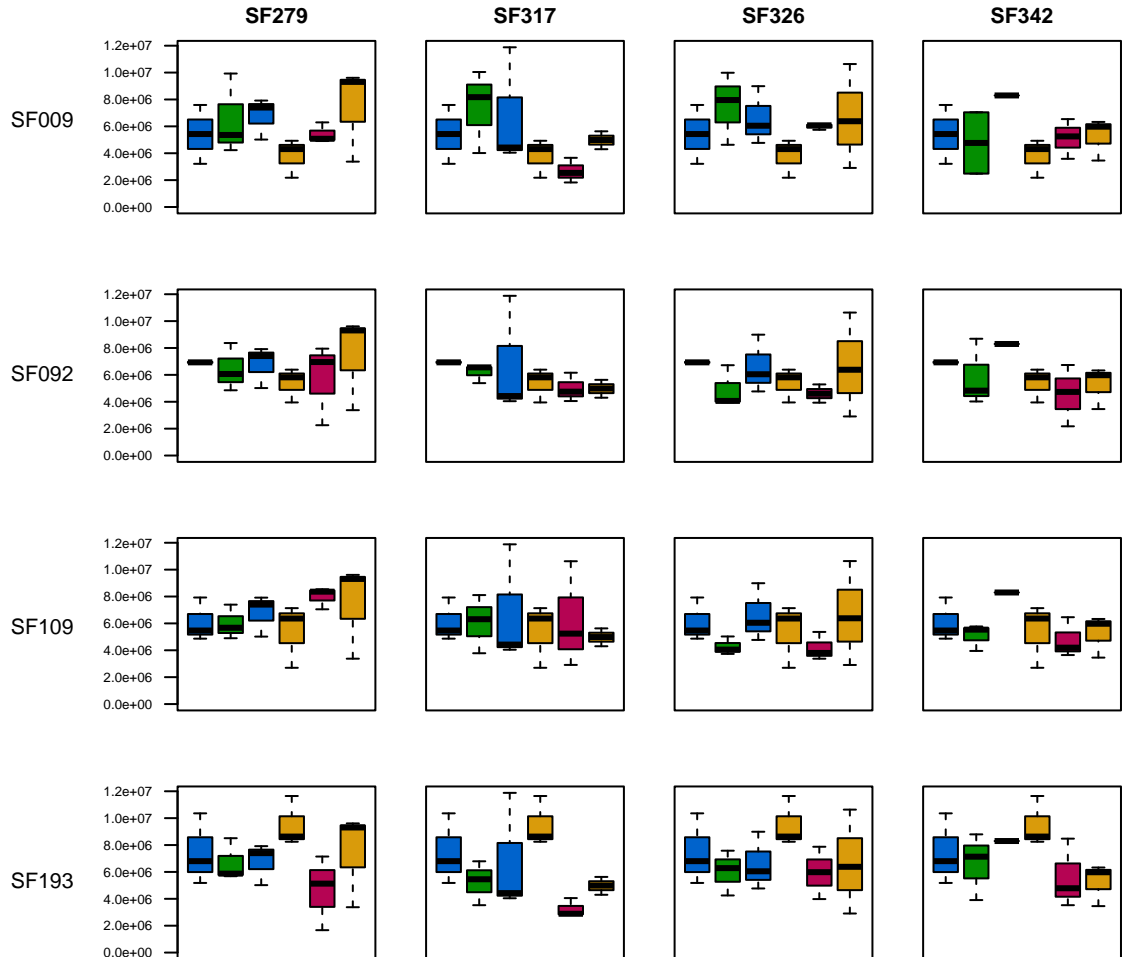

HanXRQChr01g0004221  
Putative carbohydrate binding module  
family 25; Bacterial/plant glycogen synthase

Parents WW  
Parents WD  
Hybrids WW  
Hybrids WD

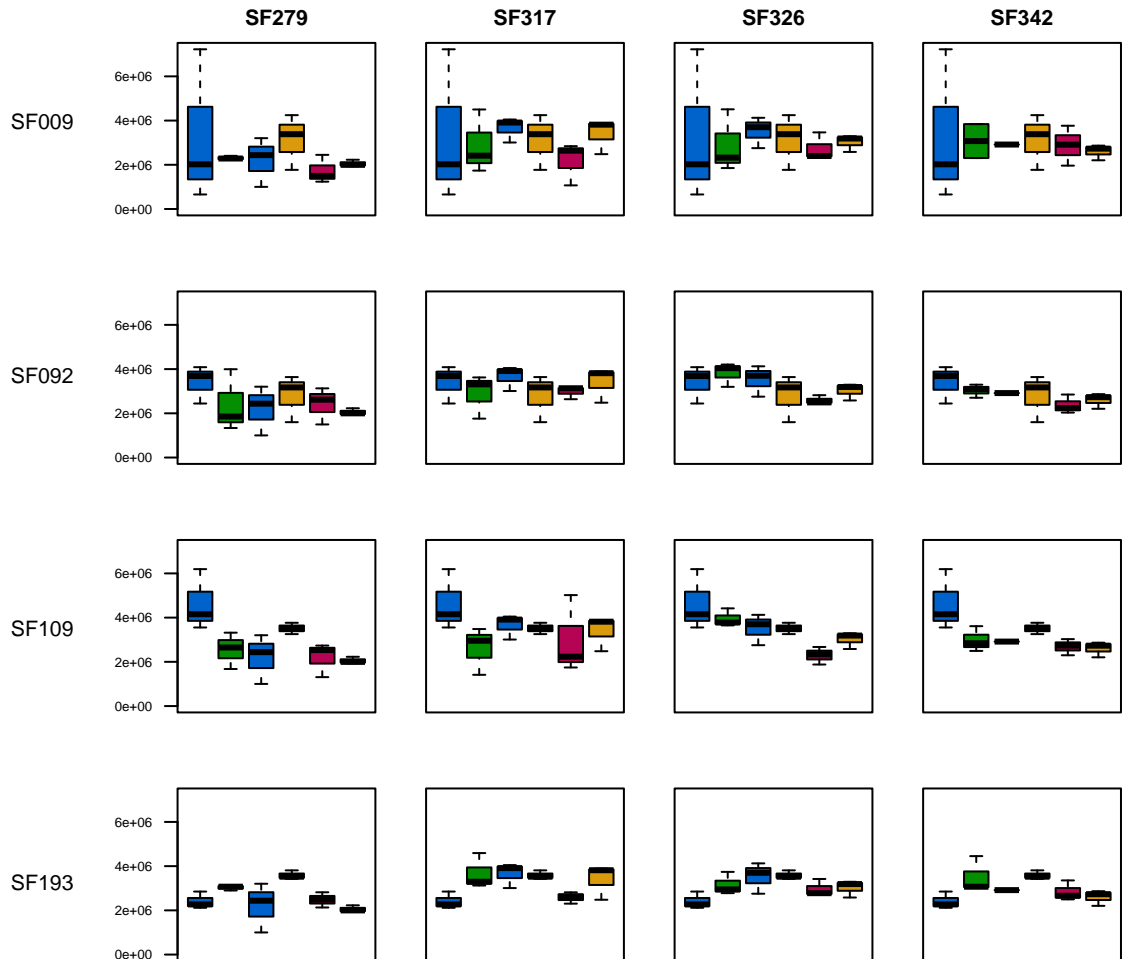



HanXRQChr10g0297801  
Probable regulator of chromosome  
condensation (RCC1) family protein

Parents WW  
Parents WD  
Hybrids WW  
Hybrids WD

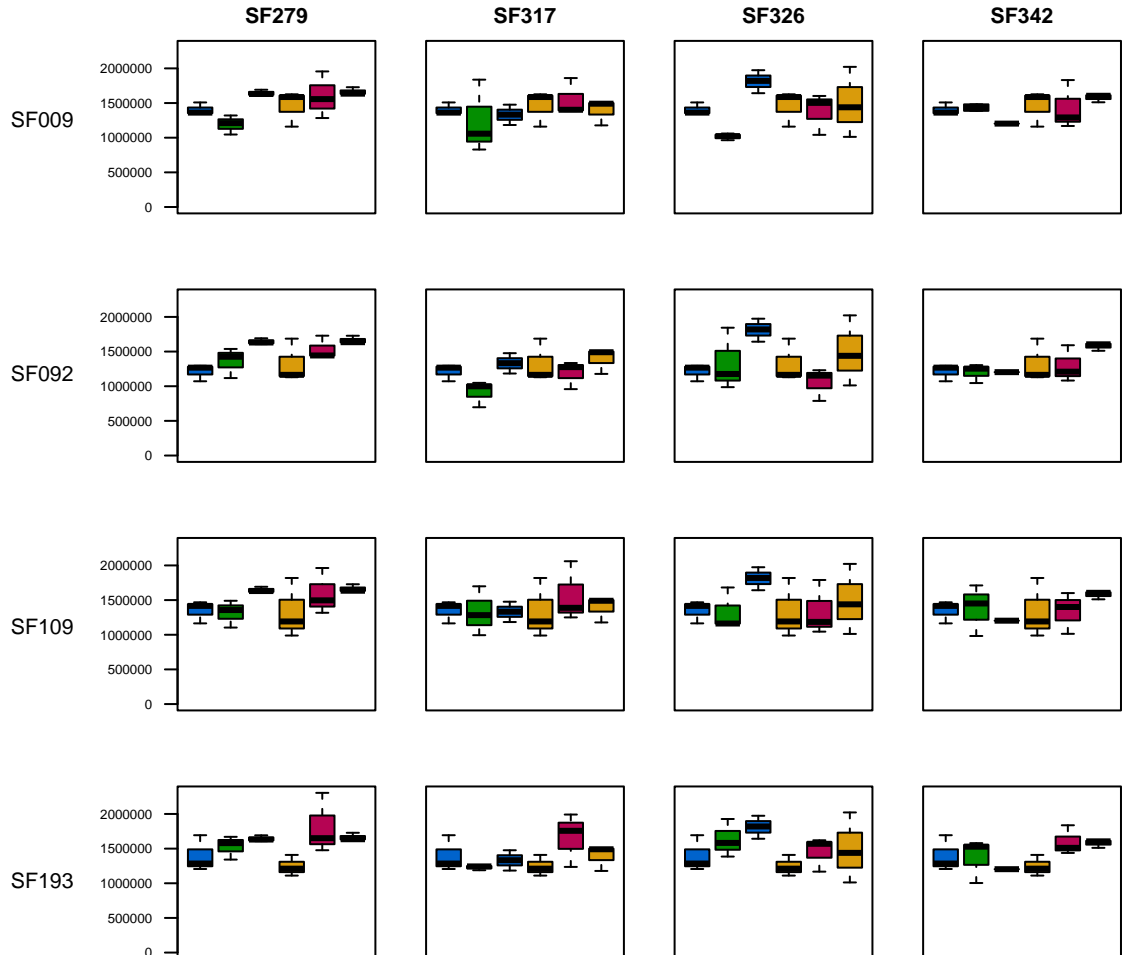

HanXRQChr01g0002941  
Putative ribosomal protein S13;  
Ribosomal protein S13-like, H2TH; 30s rib

Parents WW  
Parents WD  
Hybrids WW  
Hybrids WD

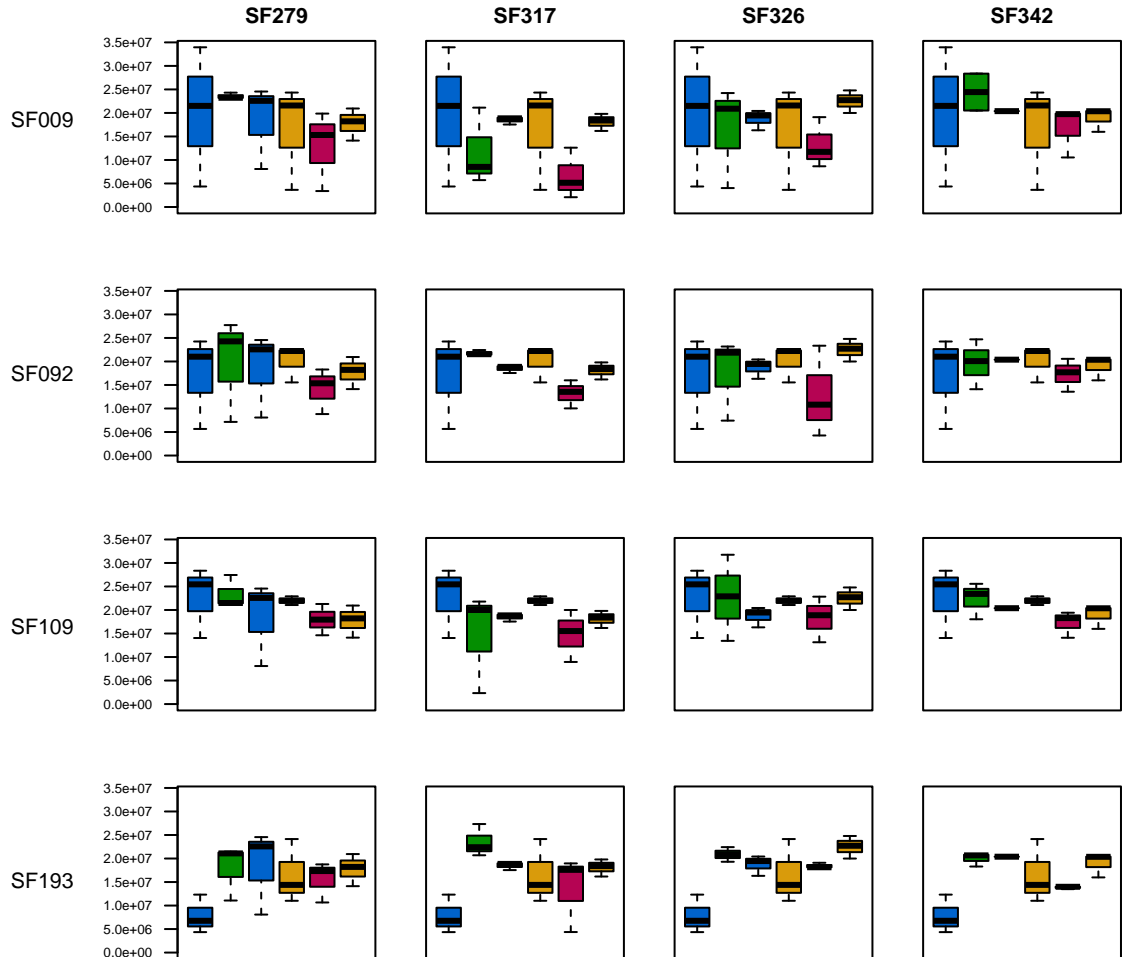

HanXRQChr14g0446641  
Putative actin family

- Parents WW
- Parents WD
- Hybrids WW
- Hybrids WD

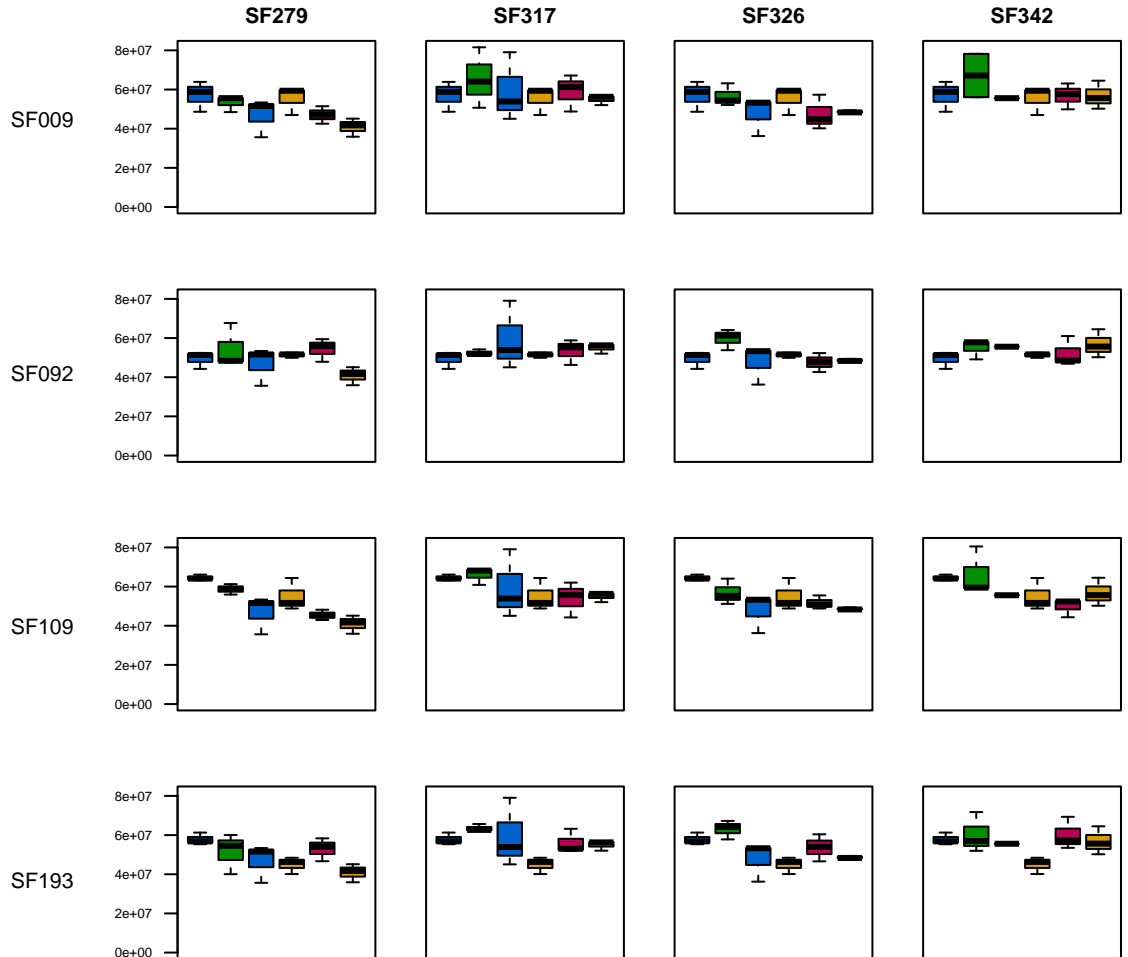

HanXRQChr03g0065901  
Probable EG45-like domain containing  
protein

Parents WW  
Parents WD  
Hybrids WW  
Hybrids WD

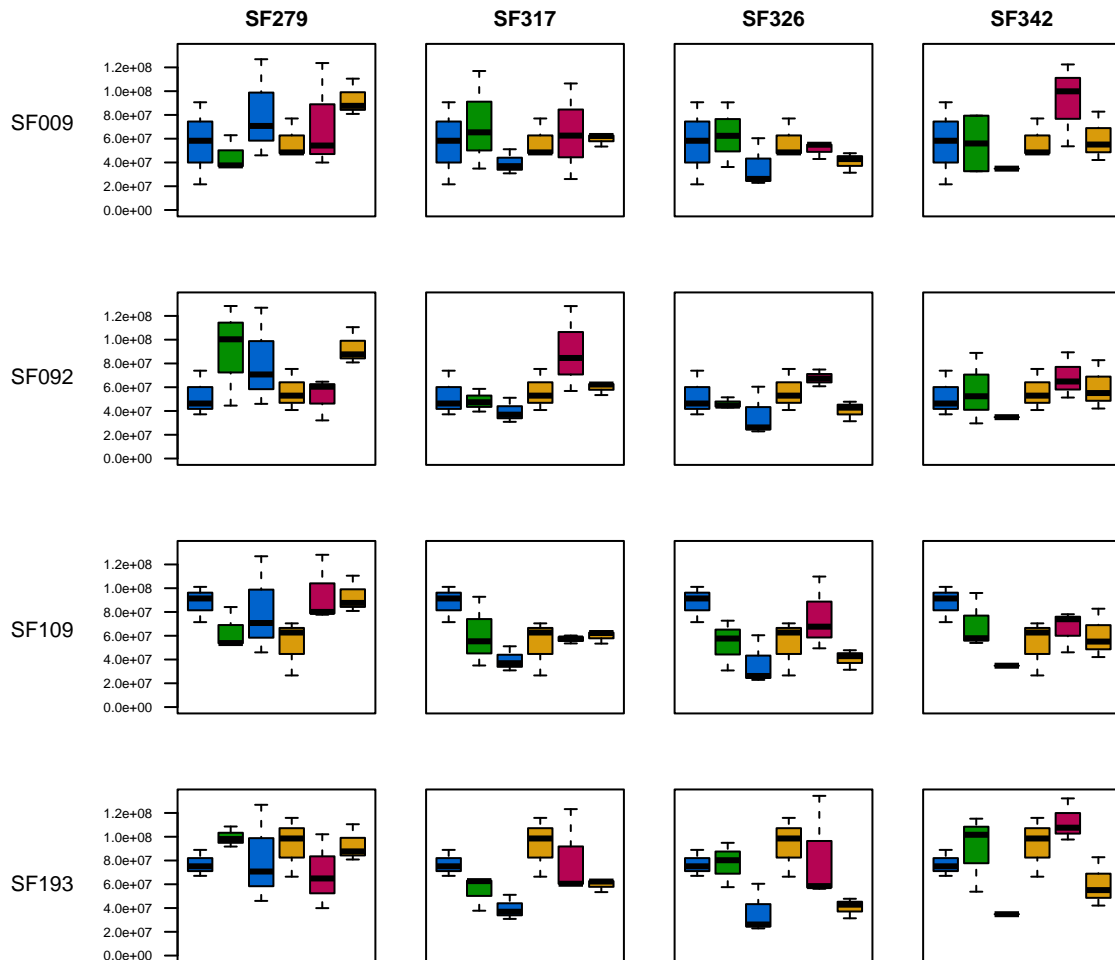

HanXRQChr14g0439821  
Probable ribosomal protein L1p/L10e  
family

Parents WW  
Parents WD  
Hybrids WW  
Hybrids WD

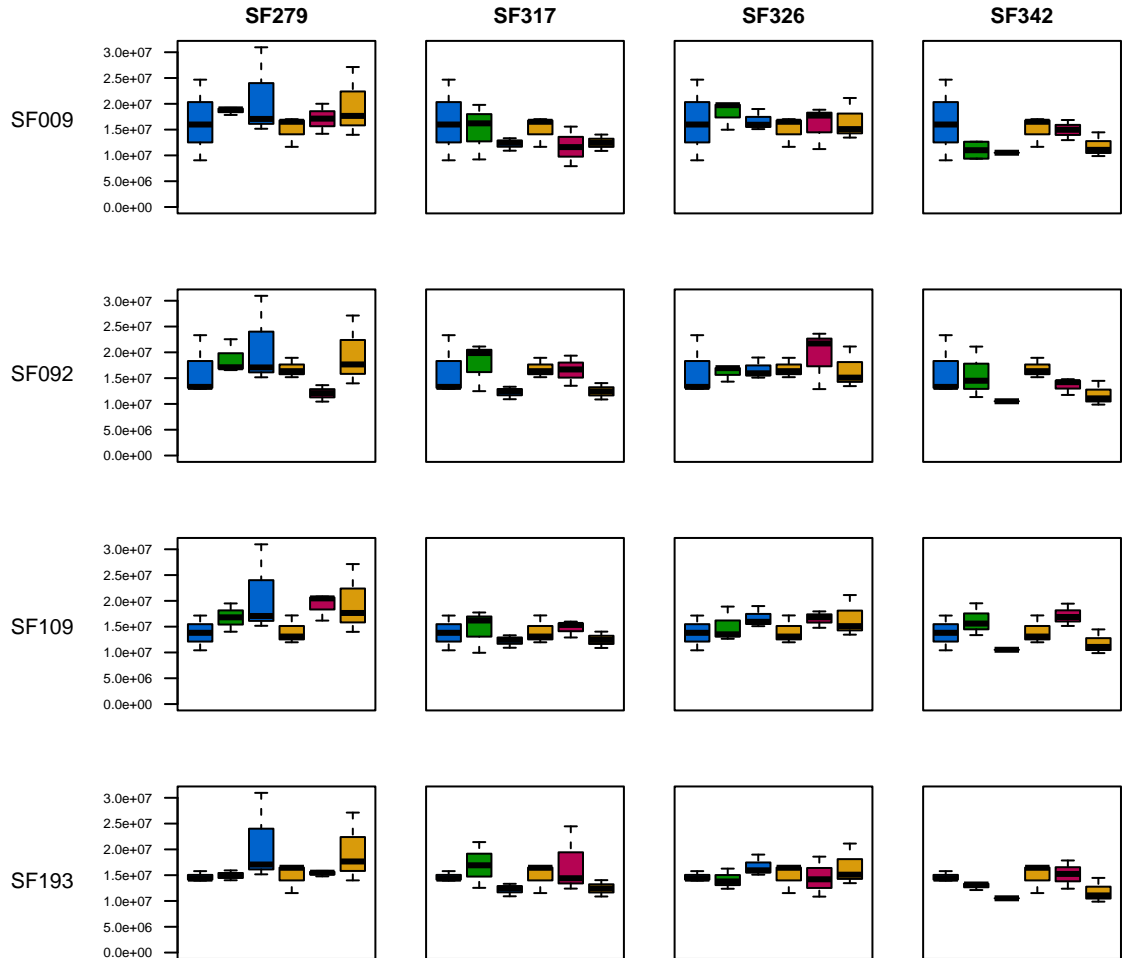

HanXRQChr17g0536361  
Probable membrane-associated  
progesterone binding protein 2

Parents WW  
Parents WD  
Hybrids WW  
Hybrids WD

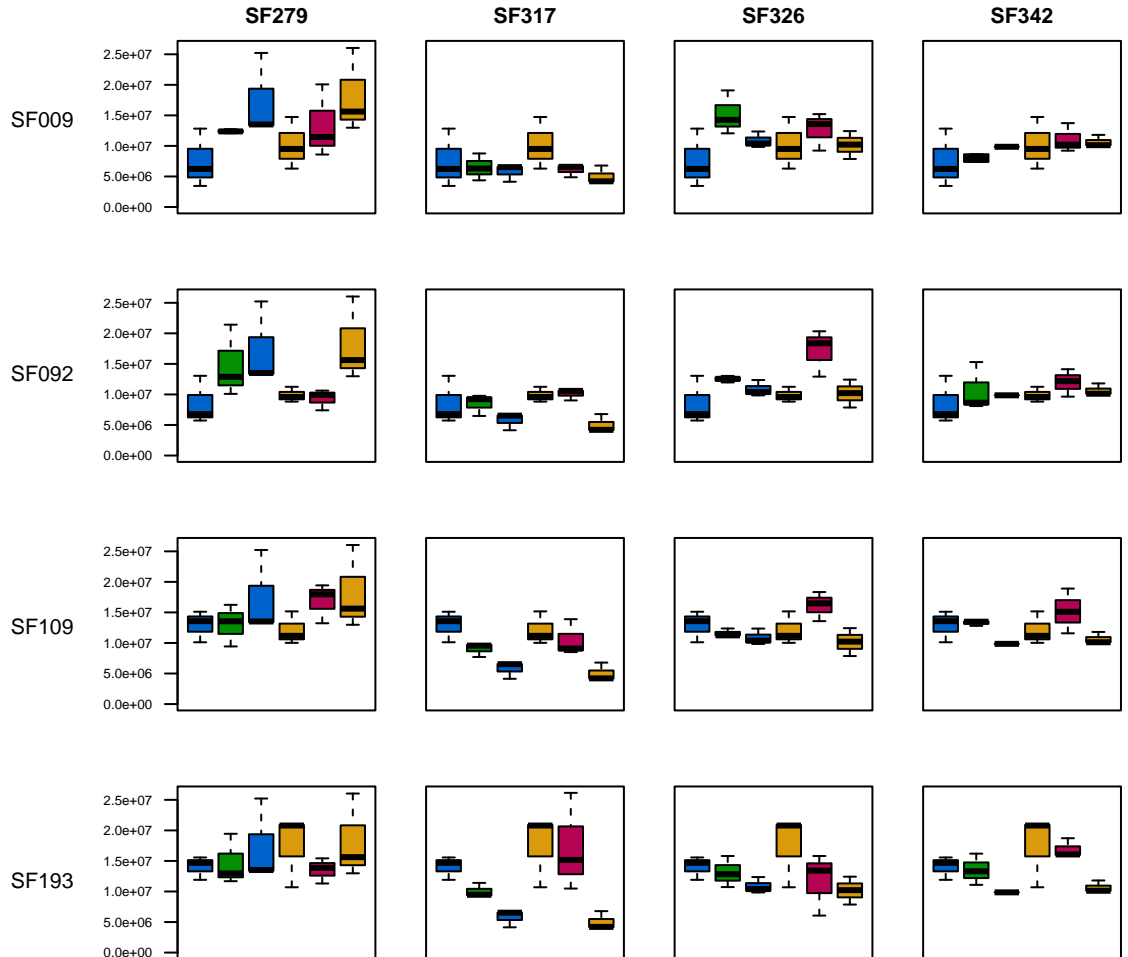

HanXRQChr08g0235061  
 Probable ATP-dependent Clp protease  
 ATP-binding subunit ClpA homolog CD4B,

Parents WW  
 Parents WD  
 Hybrids WW  
 Hybrids WD

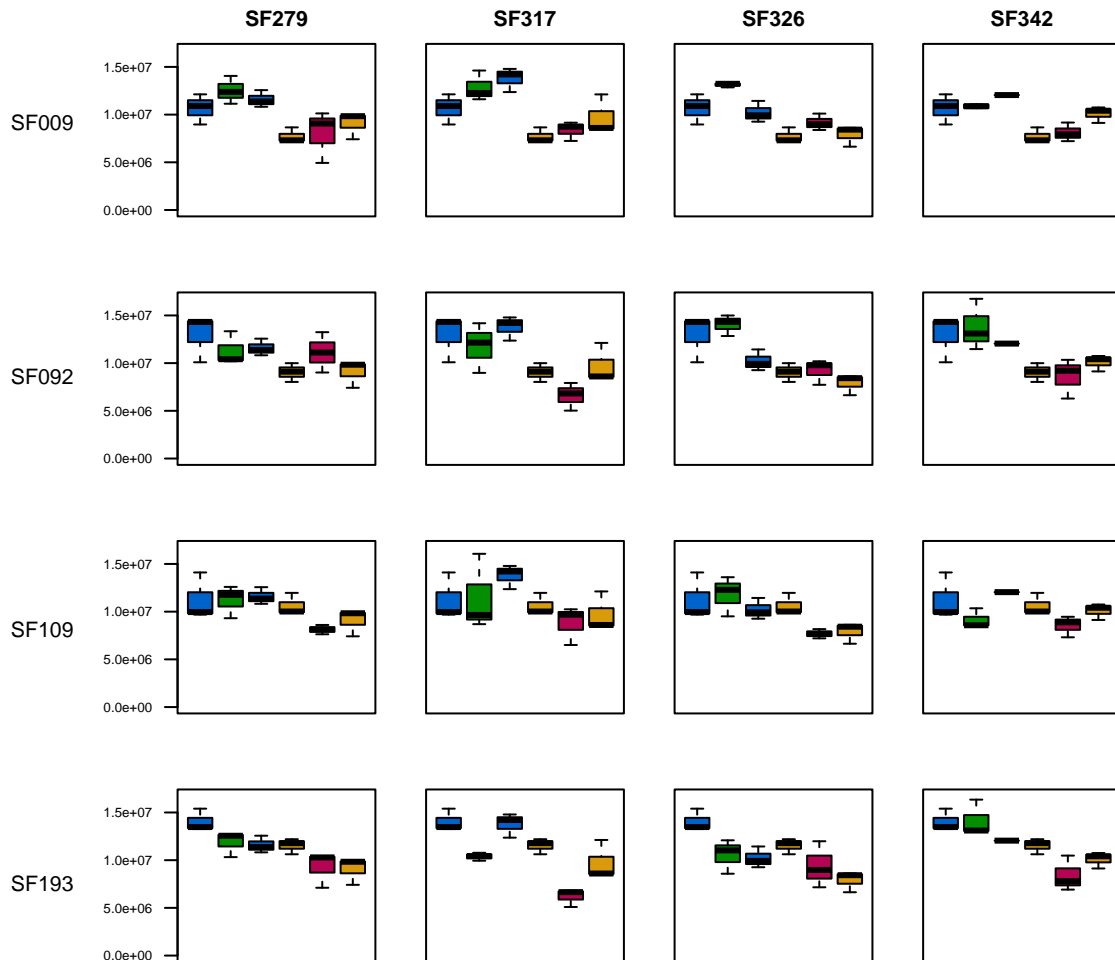

HanXRQCPg0579971  
Putative NADH:ubiquinone  
oxidoreductase, 30kDa subunit; NADH dehydrogenase

Parents WW  
Parents WD  
Hybrids WW  
Hybrids WD

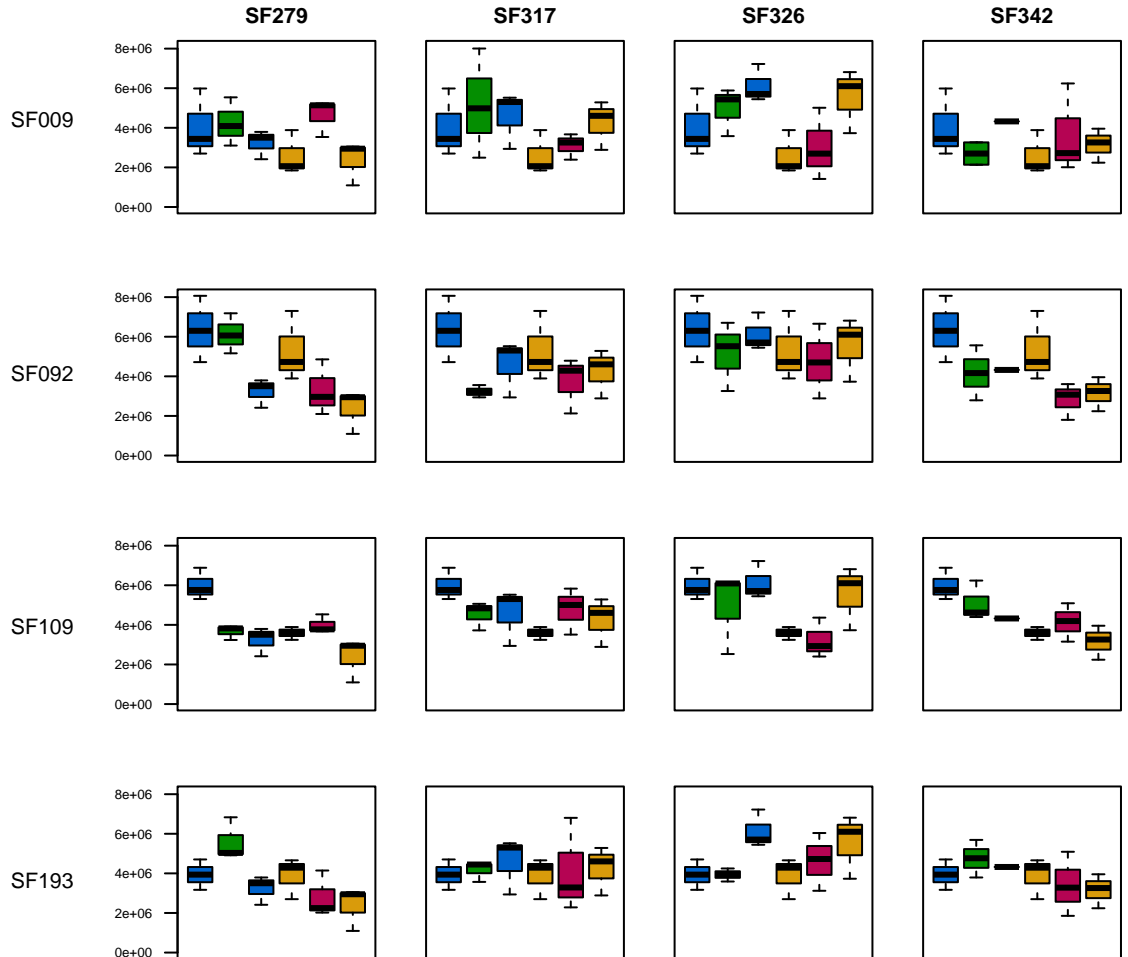



HanXRQChr11g0353951  
Probable 30S ribosomal protein S1,  
chloroplastic

Parents WW  
Parents WD  
Hybrids WW  
Hybrids WD

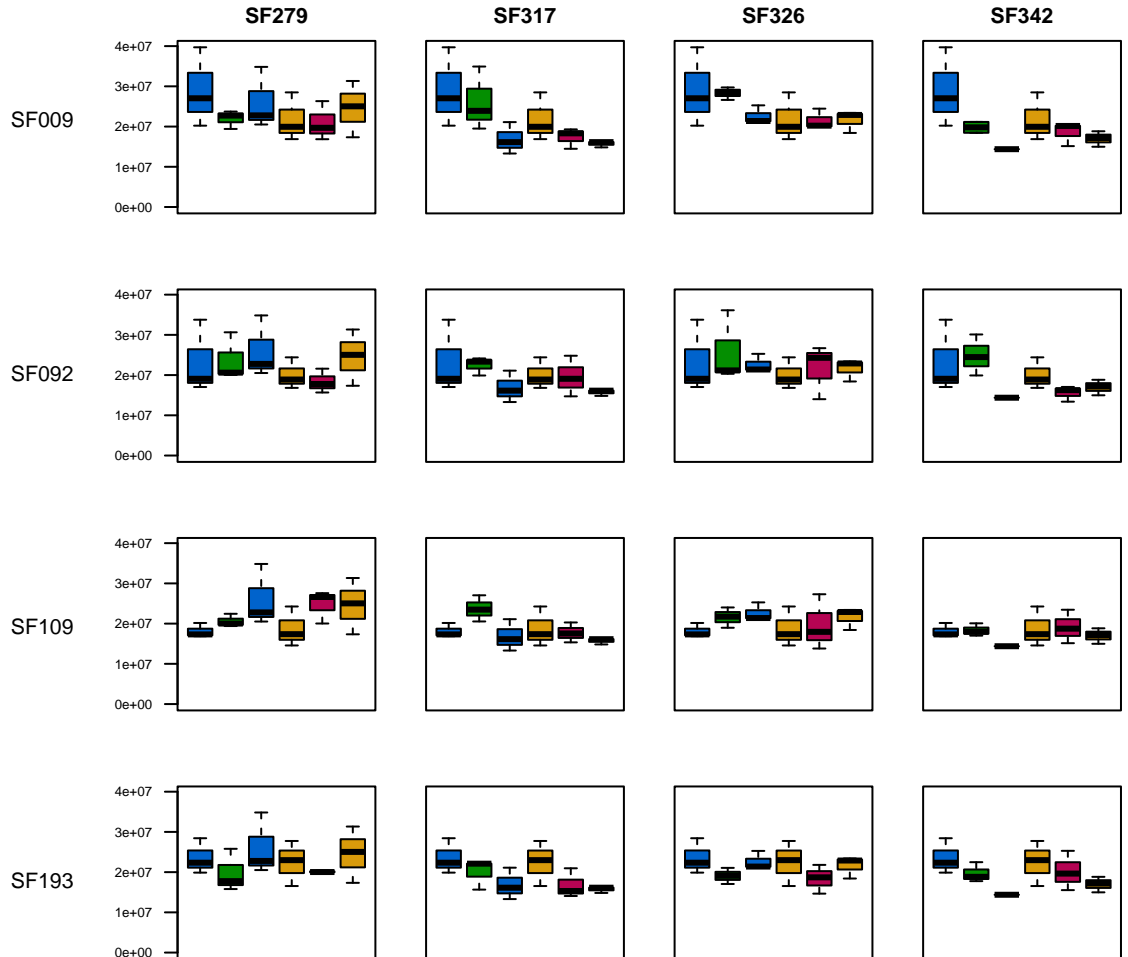

HanXRQChr05g0146341  
Probable prolyl oligopeptidase family  
protein

Parents WW  
Parents WD  
Hybrids WW  
Hybrids WD

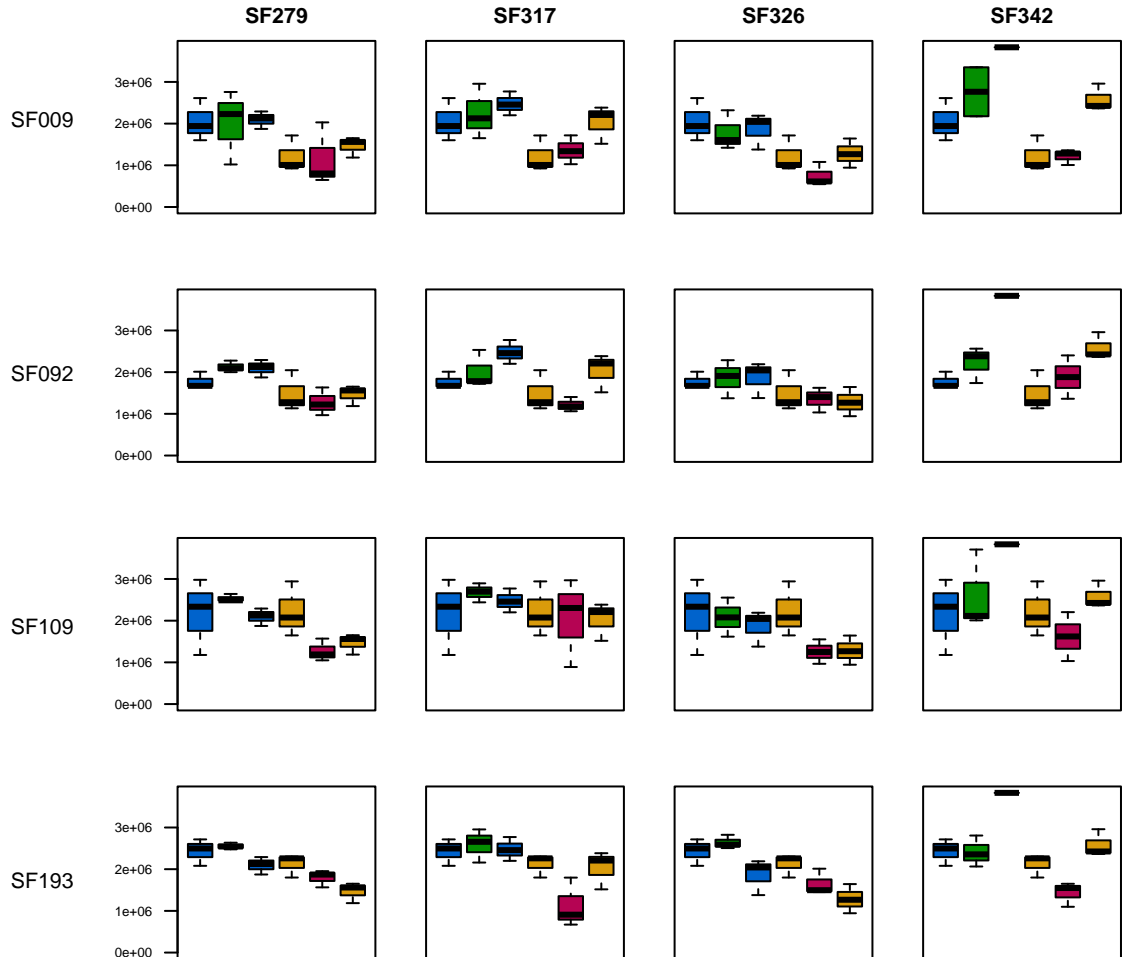

HanXRQChr03g0074991  
Putative nucleotide-binding alpha-beta  
plait domain

Parents WW  
Parents WD  
Hybrids WW  
Hybrids WD

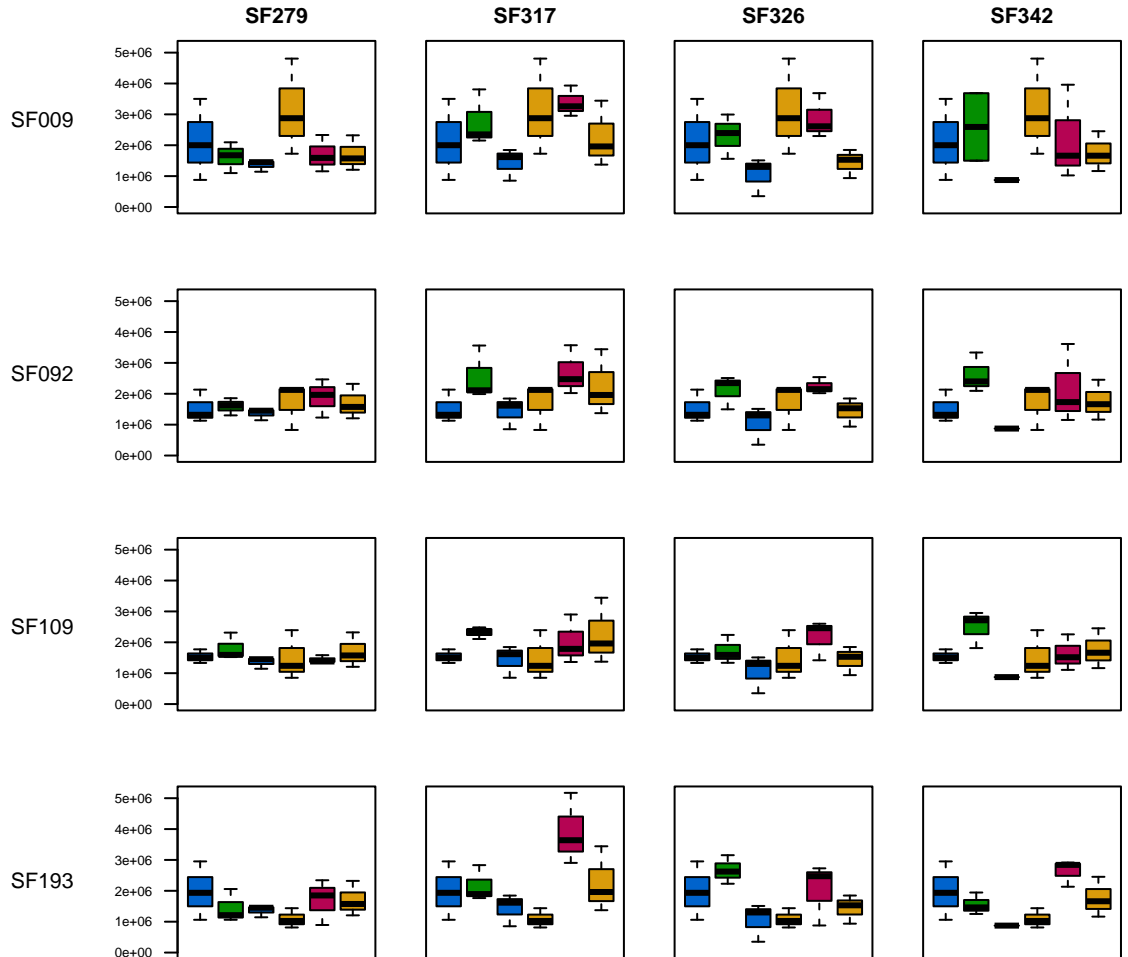

HanXRQChr17g0563021  
 Putative lipoyl synthase; Electron  
 transport accessory protein-like domain

Parents WW  
 Parents WD  
 Hybrids WW  
 Hybrids WD

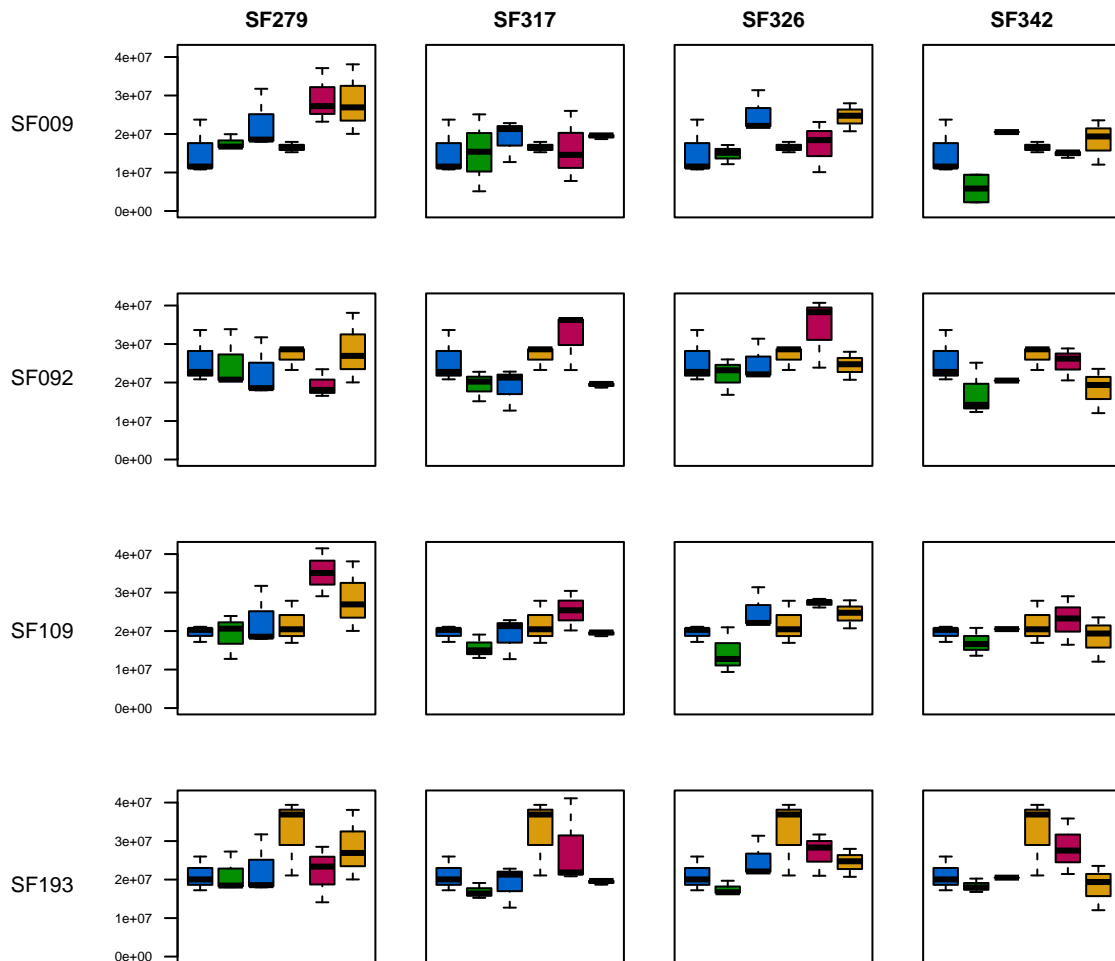

HanXRQChr14g0450601  
Probable nuclear transport factor 2B

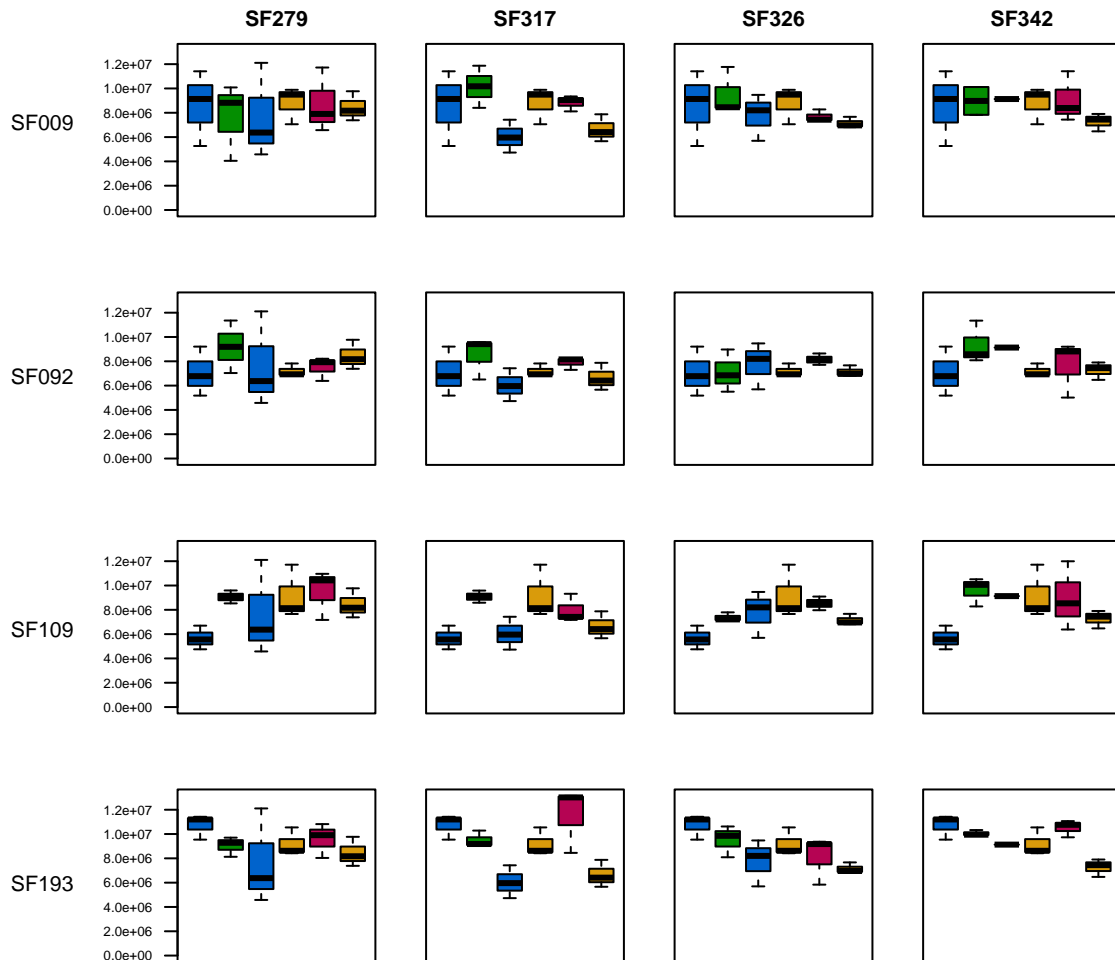

HanXRQChr02g0053981  
 Probable glycosyl hydrolases family 31  
 protein

Parents WW  
 Parents WD  
 Hybrids WW  
 Hybrids WD

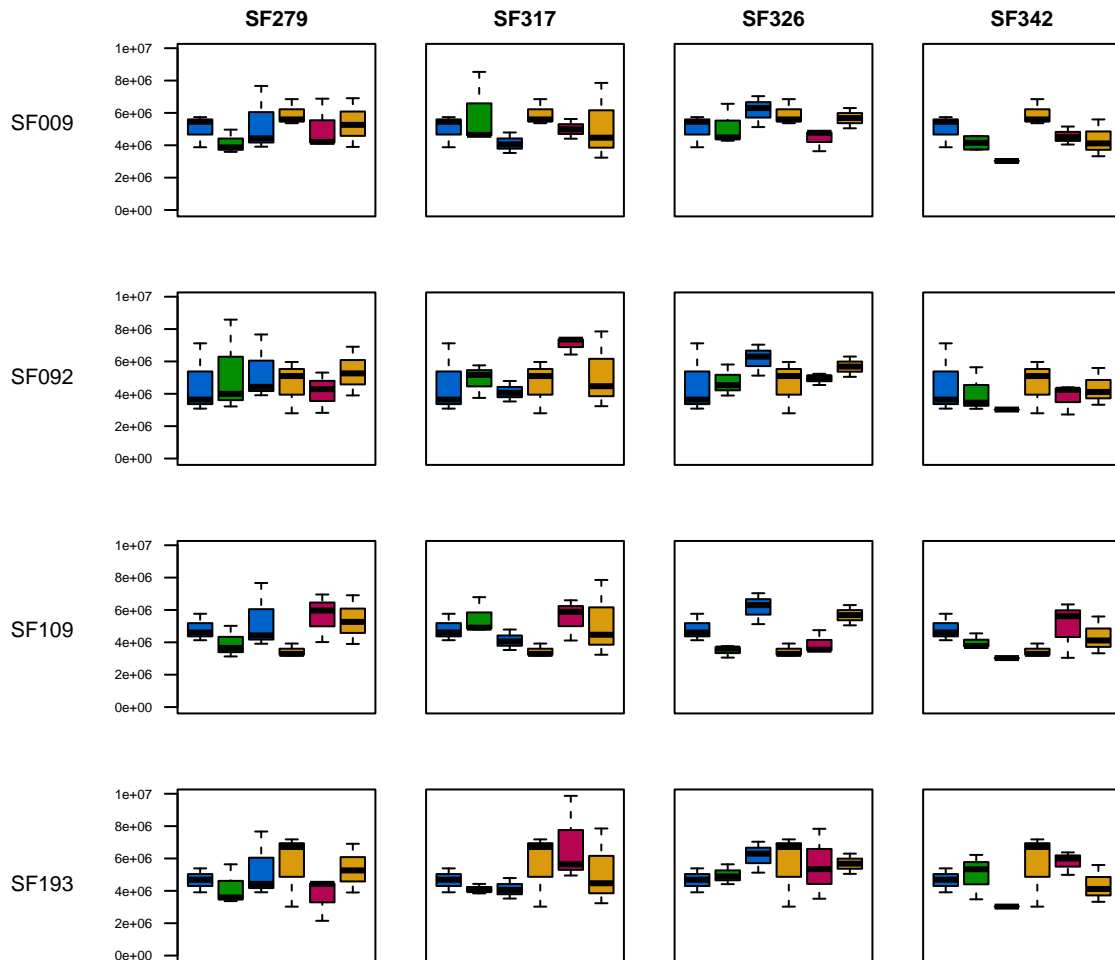

HanXRQChr03g0092721  
Putative ribosomal protein S19/S15;  
Ribosomal protein S19, superfamily

Parents WW  
Parents WD  
Hybrids WW  
Hybrids WD

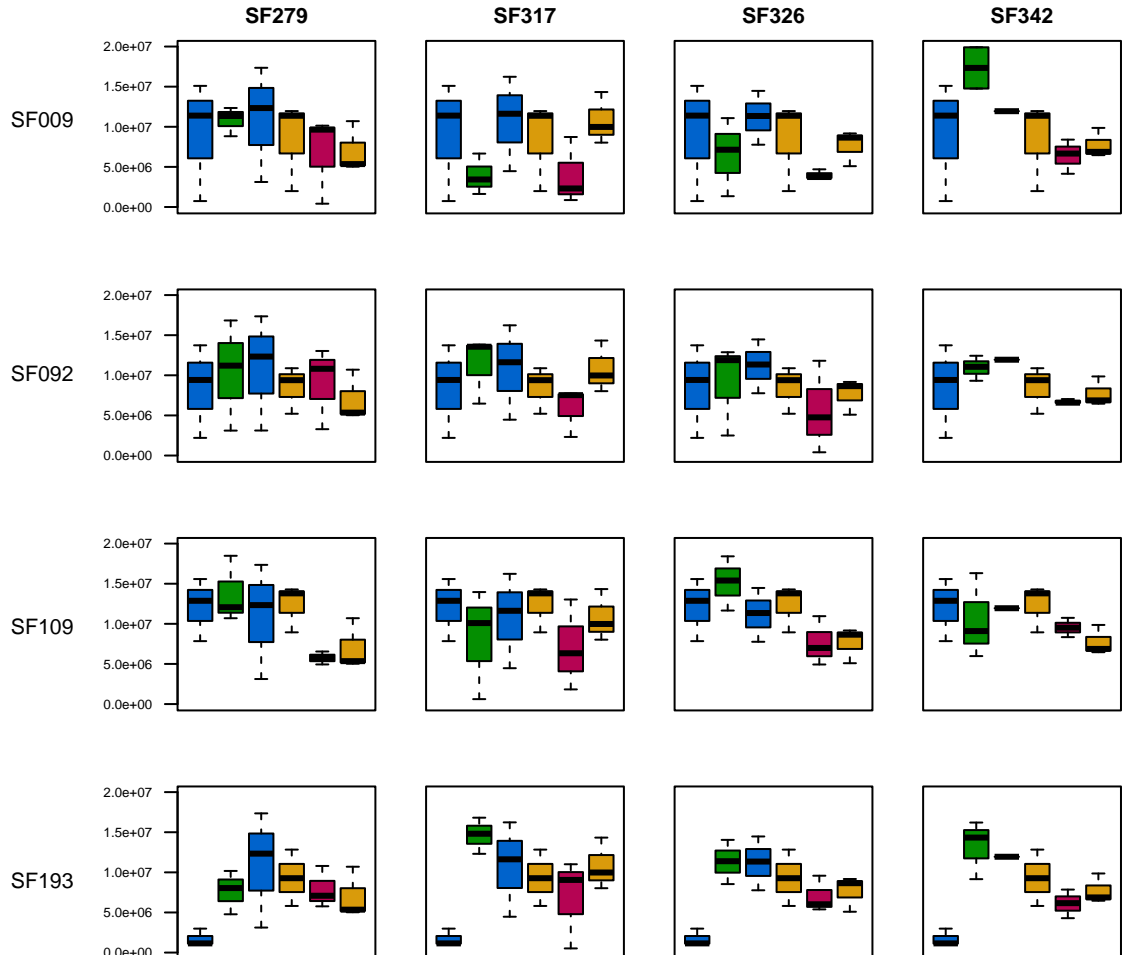

HanXRQChr00c0496g0575161  
Putative ribosomal protein S16;  
Ribosomal protein S16 domain

Parents WW  
Parents WD  
Hybrids WW  
Hybrids WD

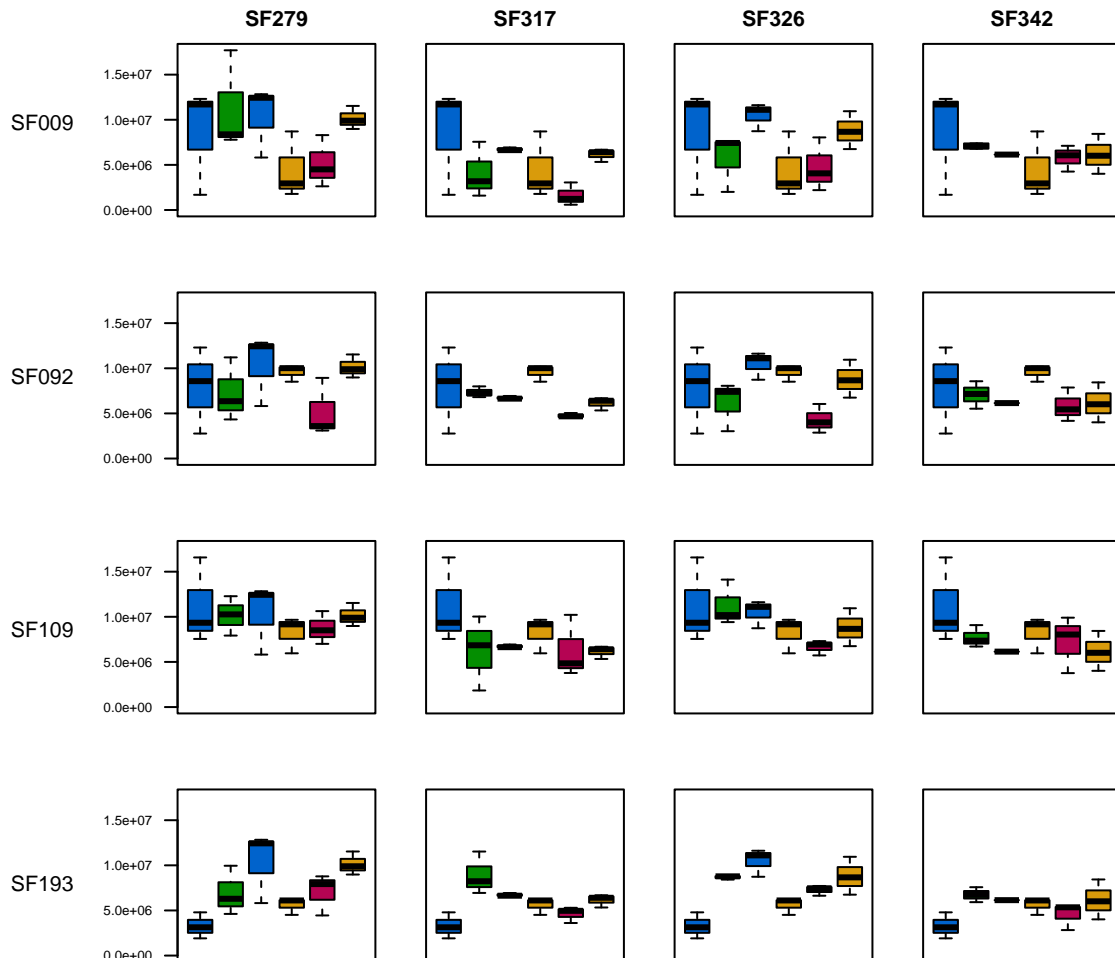



HanXRQChr15g0467021  
 Probable NADH-ubiquinone oxidoreductas  
 24 kDa subunit, putative

Parents WW  
 Parents WD  
 Hybrids WW  
 Hybrids WD

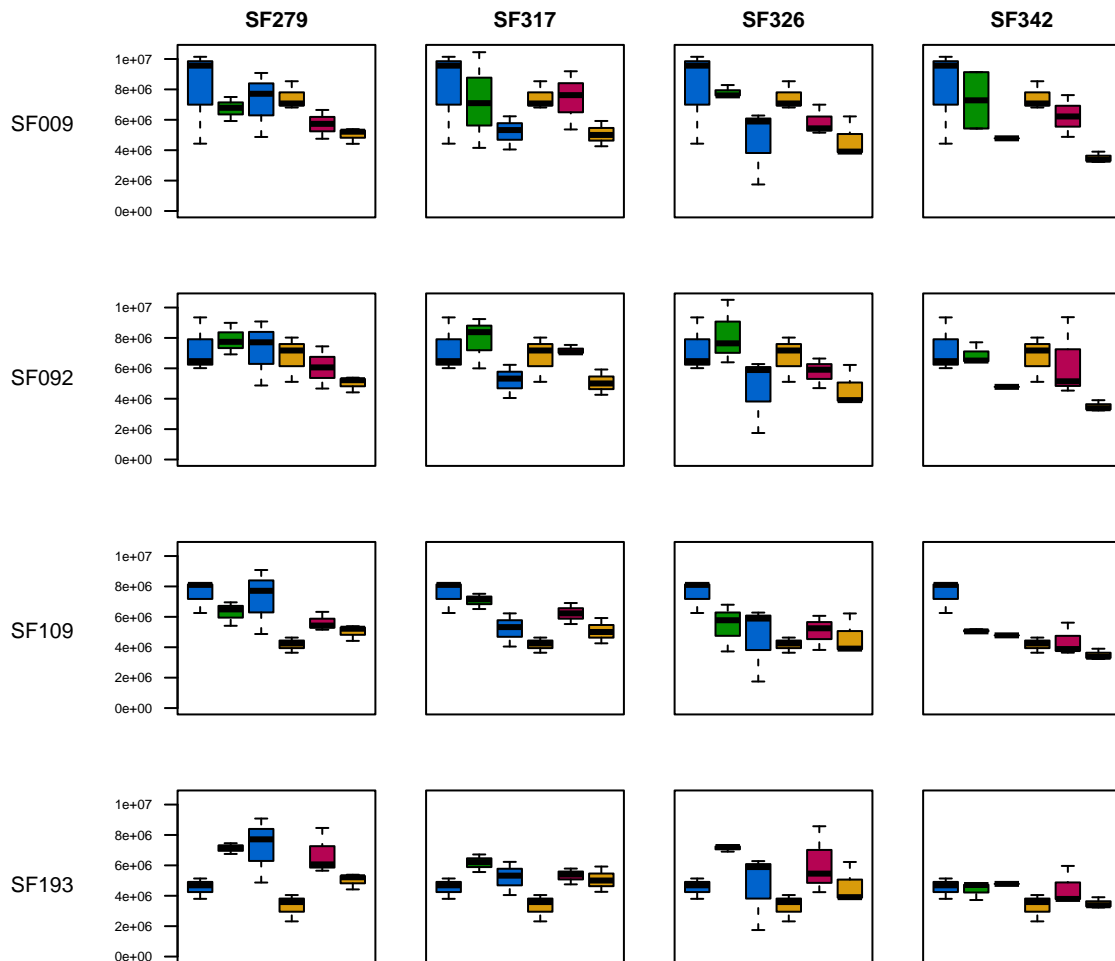

HanXRQChr10g0303441  
Probable nitrilase/cyanide hydratase  
and apolipoprotein N-acyltransferase family

Parents WW  
Parents WD  
Hybrids WW  
Hybrids WD

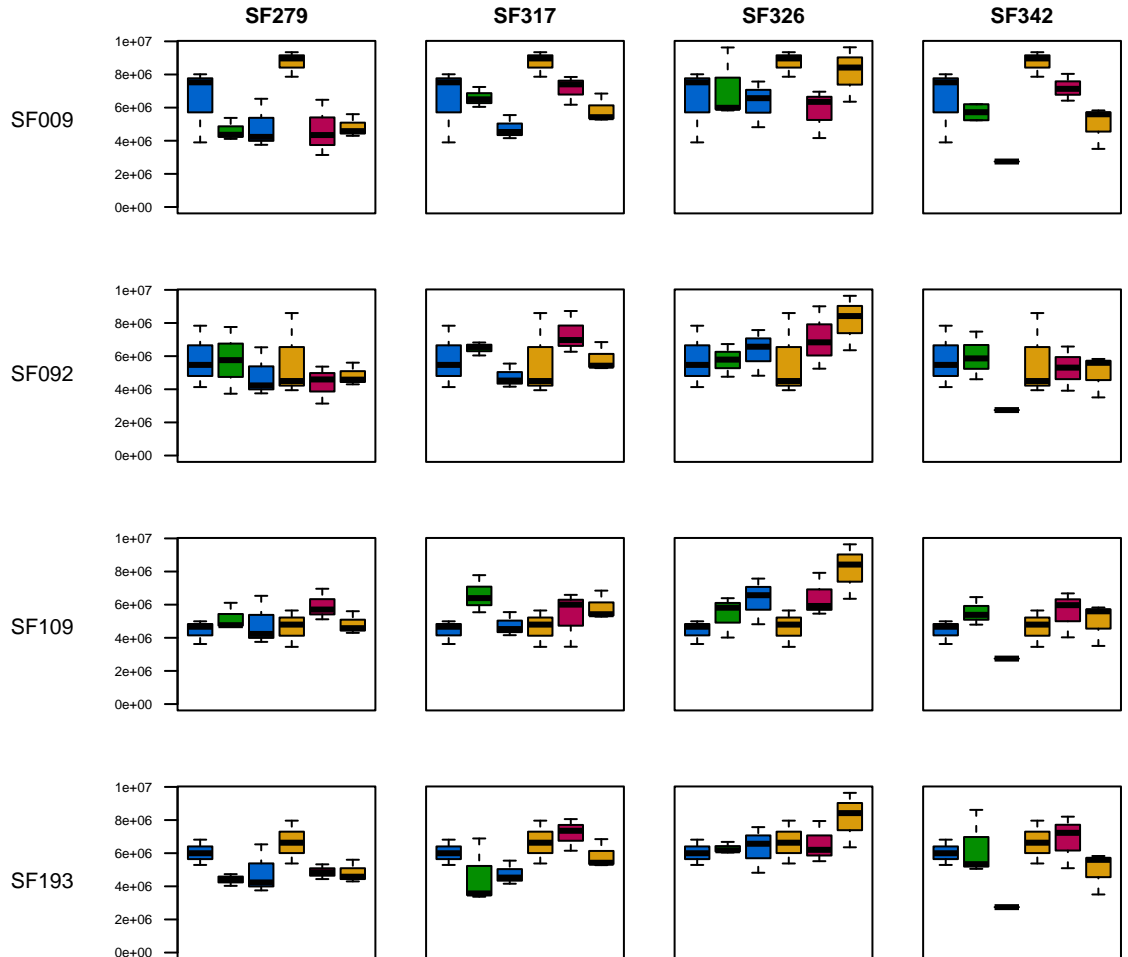

HanXRQChr07g0191741  
Probable NADH dehydrogenase  
[ubiquinone] iron-sulfur protein 1, mitochond

Parents WW  
Parents WD  
Hybrids WW  
Hybrids WD

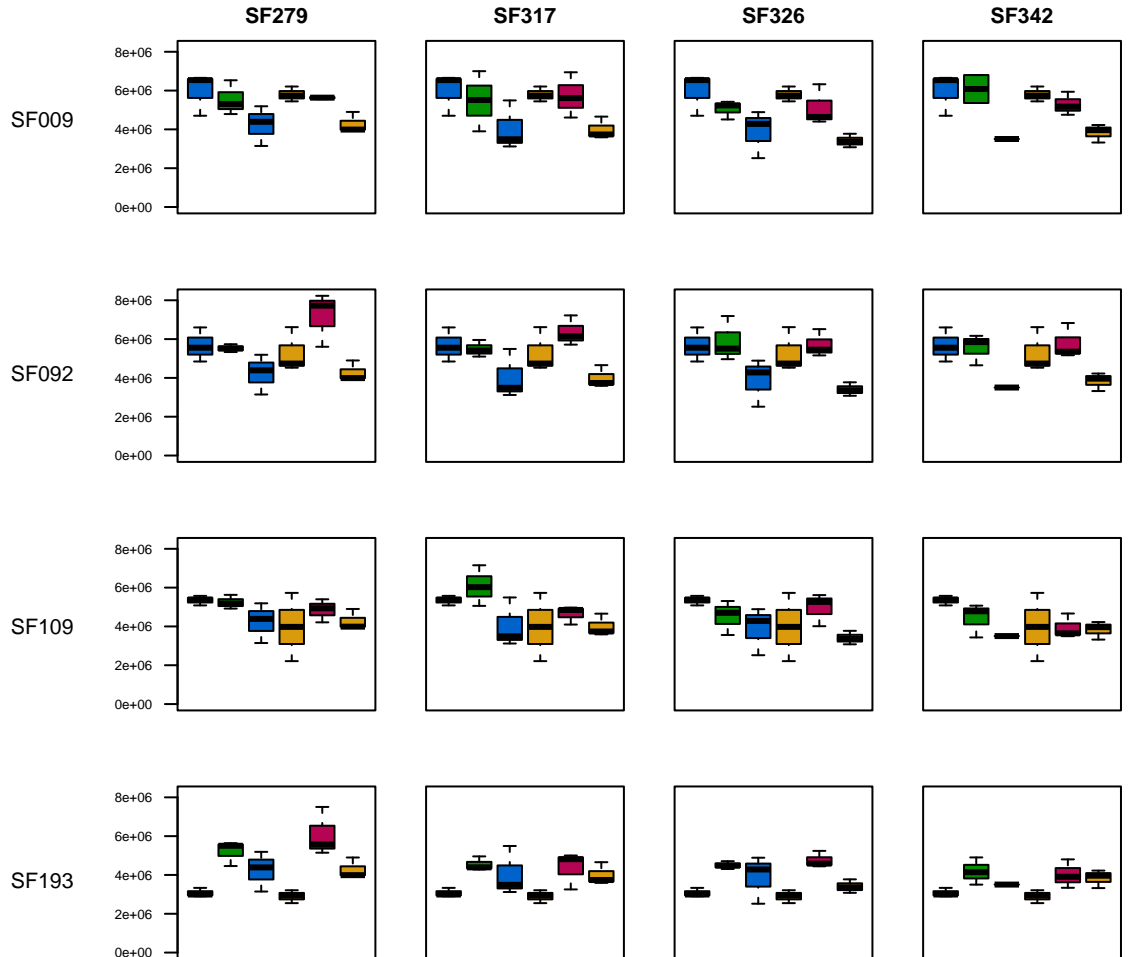

HanXRQChr01g0015151  
 Putative ribosomal protein L13;  
 Ribosomal protein L13, conserved site; Rib

Parents WW  
 Parents WD  
 Hybrids WW  
 Hybrids WD

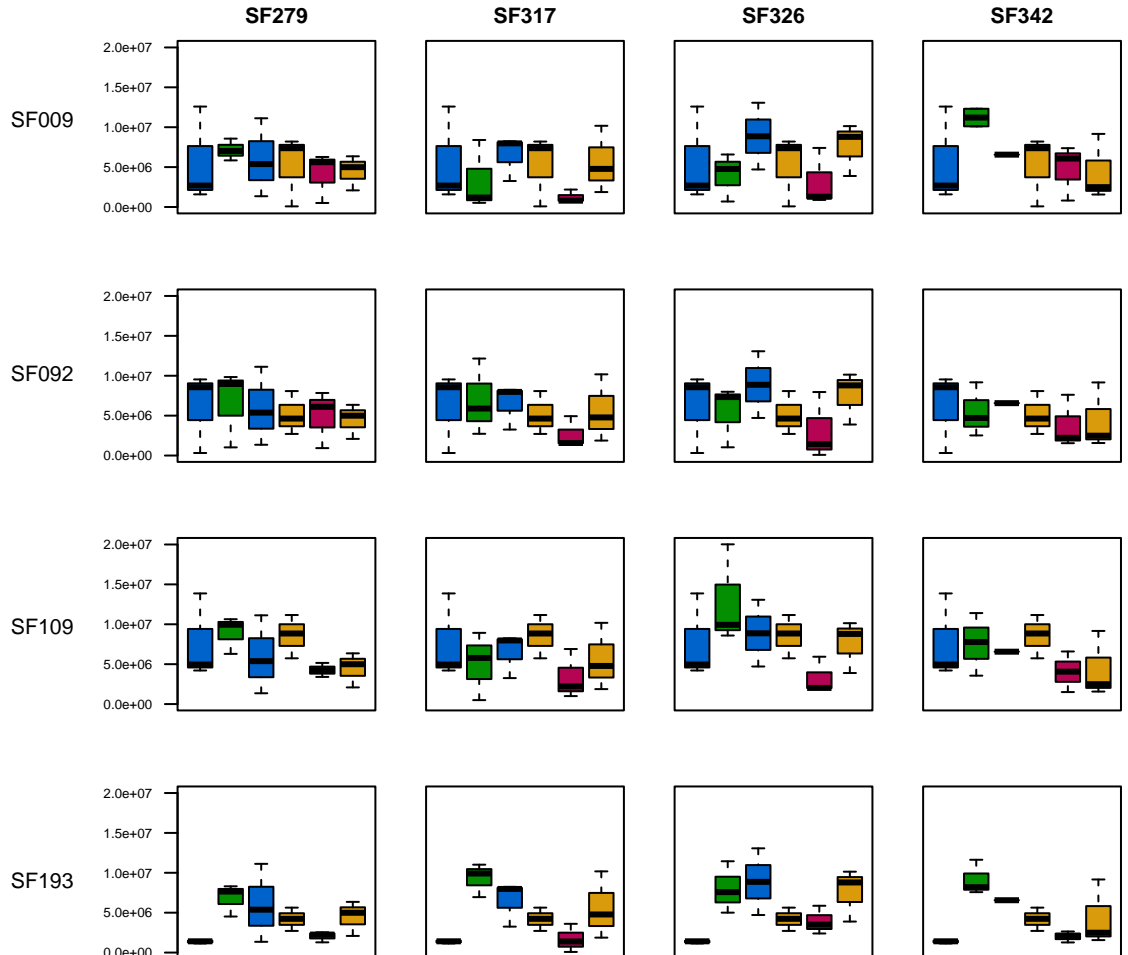

HanXRQChr16g0513601  
Probable elongation factor 1-gamma

Parents WW  
Parents WD  
Hybrids WW  
Hybrids WD

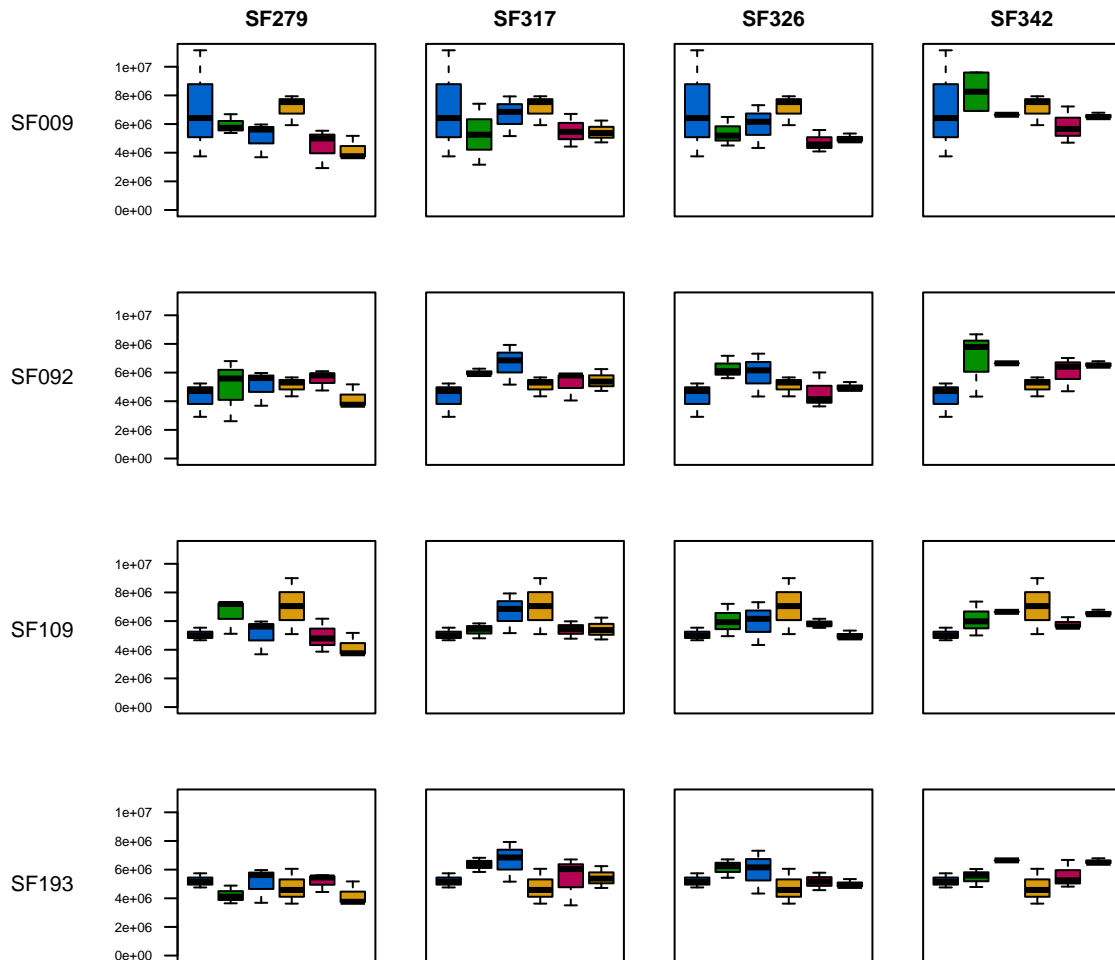

HanXRQChr06g0177301  
Probable disproportionating enzyme 2

Parents WW  
Parents WD  
Hybrids WW  
Hybrids WD

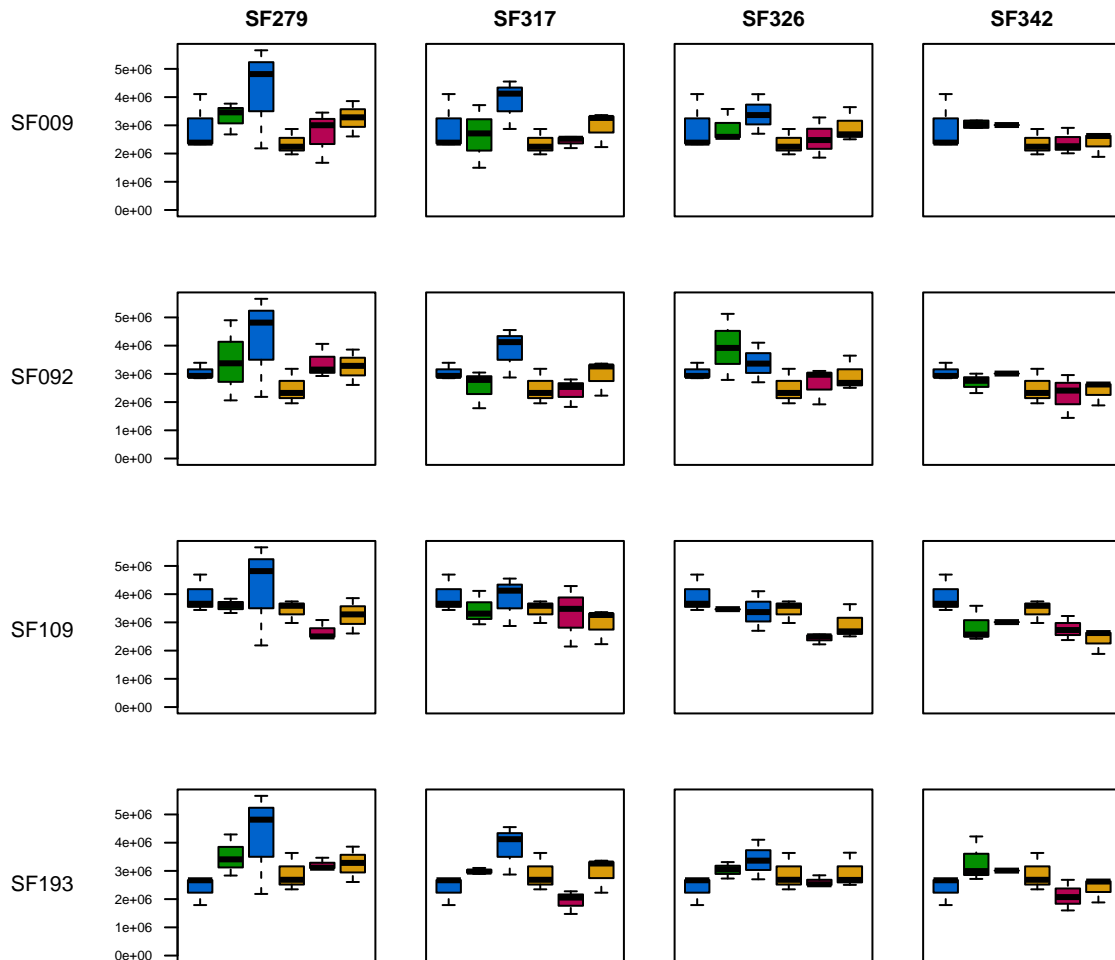

HanXRQChr11g0351581  
Putative glycoside hydrolase family 17;  
Glycoside hydrolase superfamily

Parents WW  
Parents WD  
Hybrids WW  
Hybrids WD

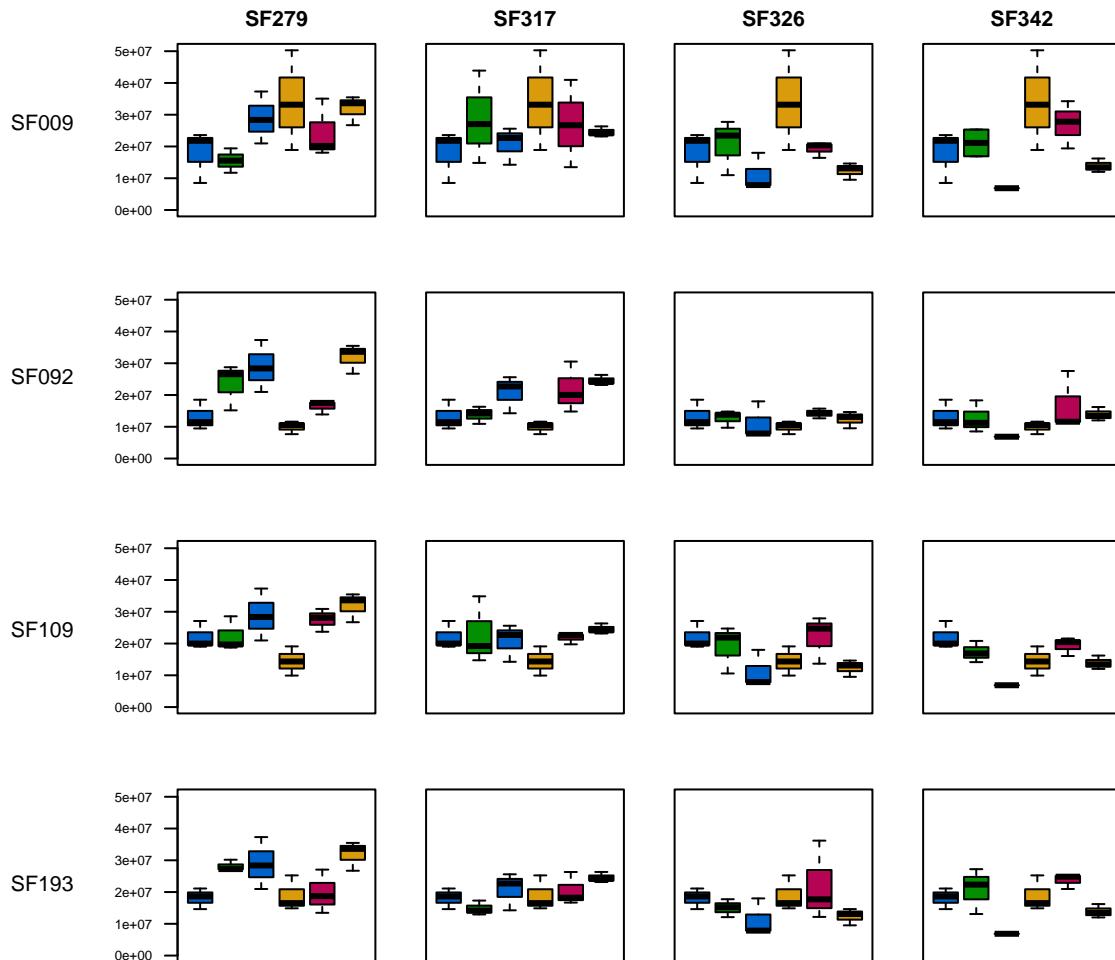

HanXRQChr08g0222581  
Uncharacterized conserved protein

Parents WW  
Parents WD  
Hybrids WW  
Hybrids WD

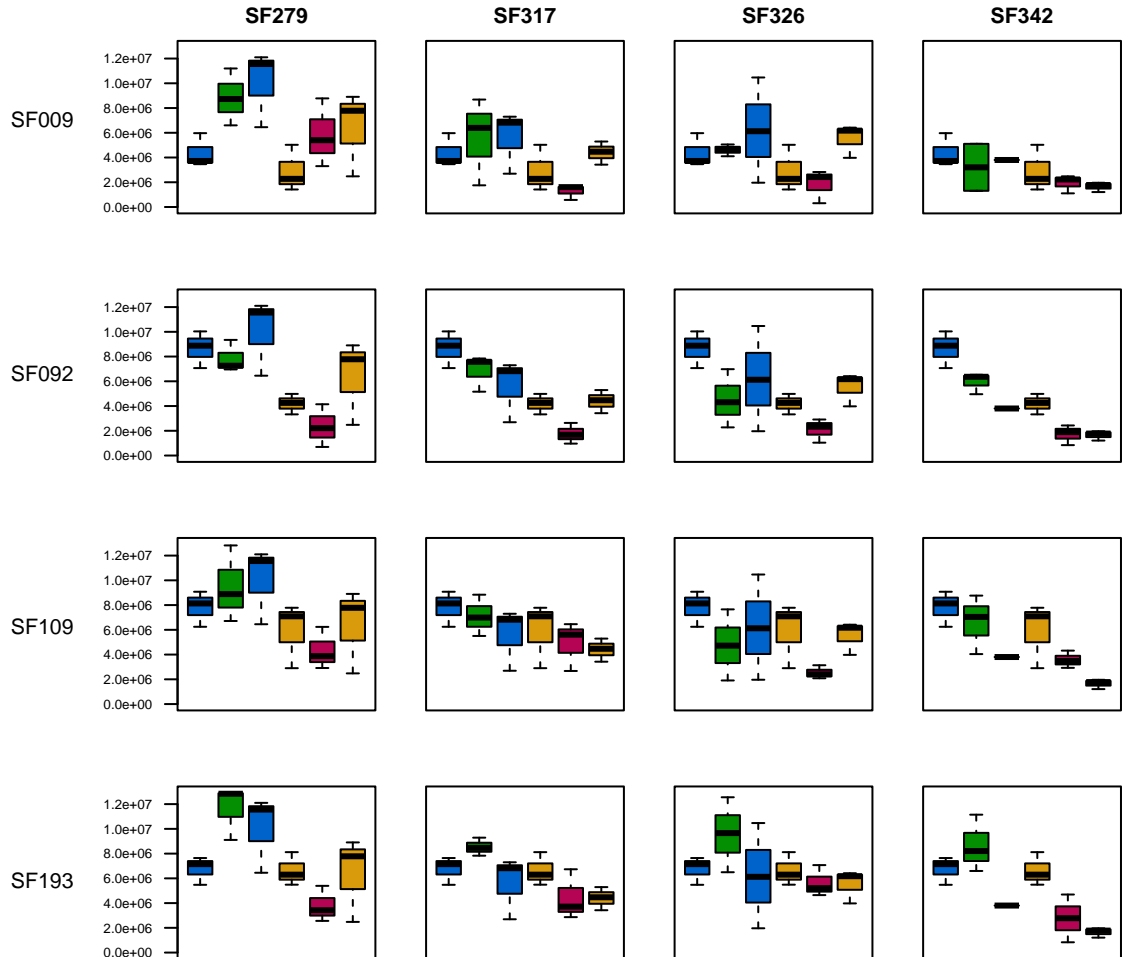



HanXRQChr13g0423741  
Putative hyaluronan/mRNA-binding  
protein; Stm1, N-terminal

Parents WW  
Parents WD  
Hybrids WW  
Hybrids WD

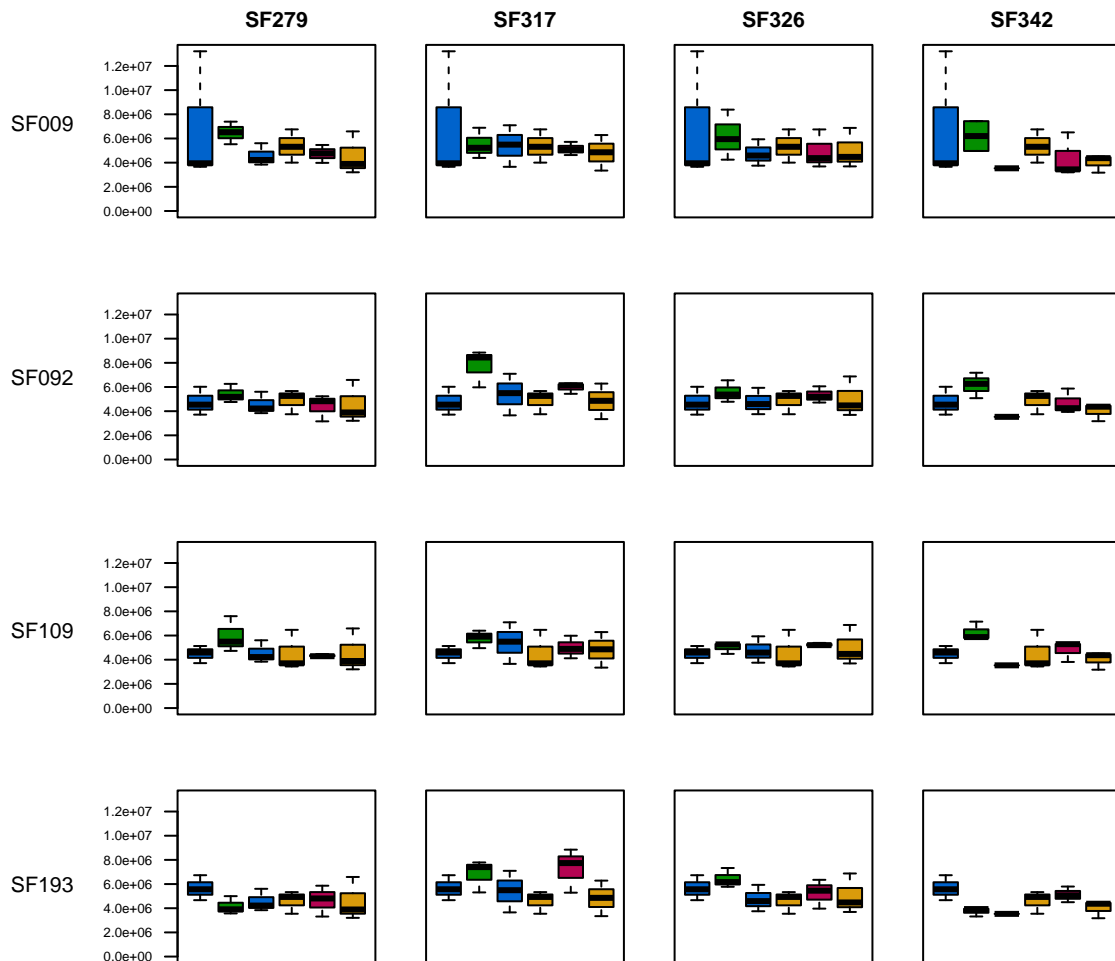

HanXRQChr17g0537361  
Putative  
UDP-glucuronosyl/UDP-glucosyltransferas

Parents WW  
Parents WD  
Hybrids WW  
Hybrids WD

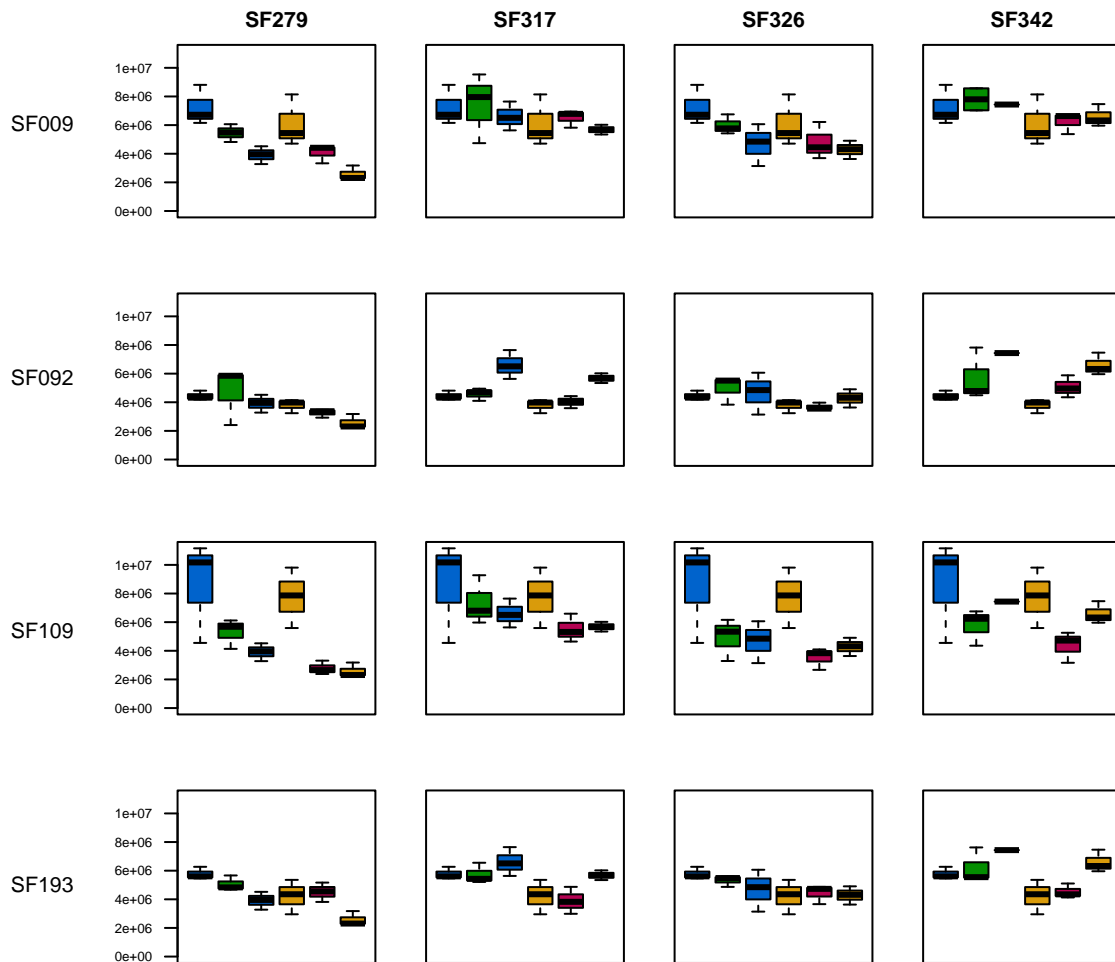

HanXRQChr08g0230021  
Probable urease accessory protein G

- Parents WW
- Parents WD
- Hybrids WW
- Hybrids WD

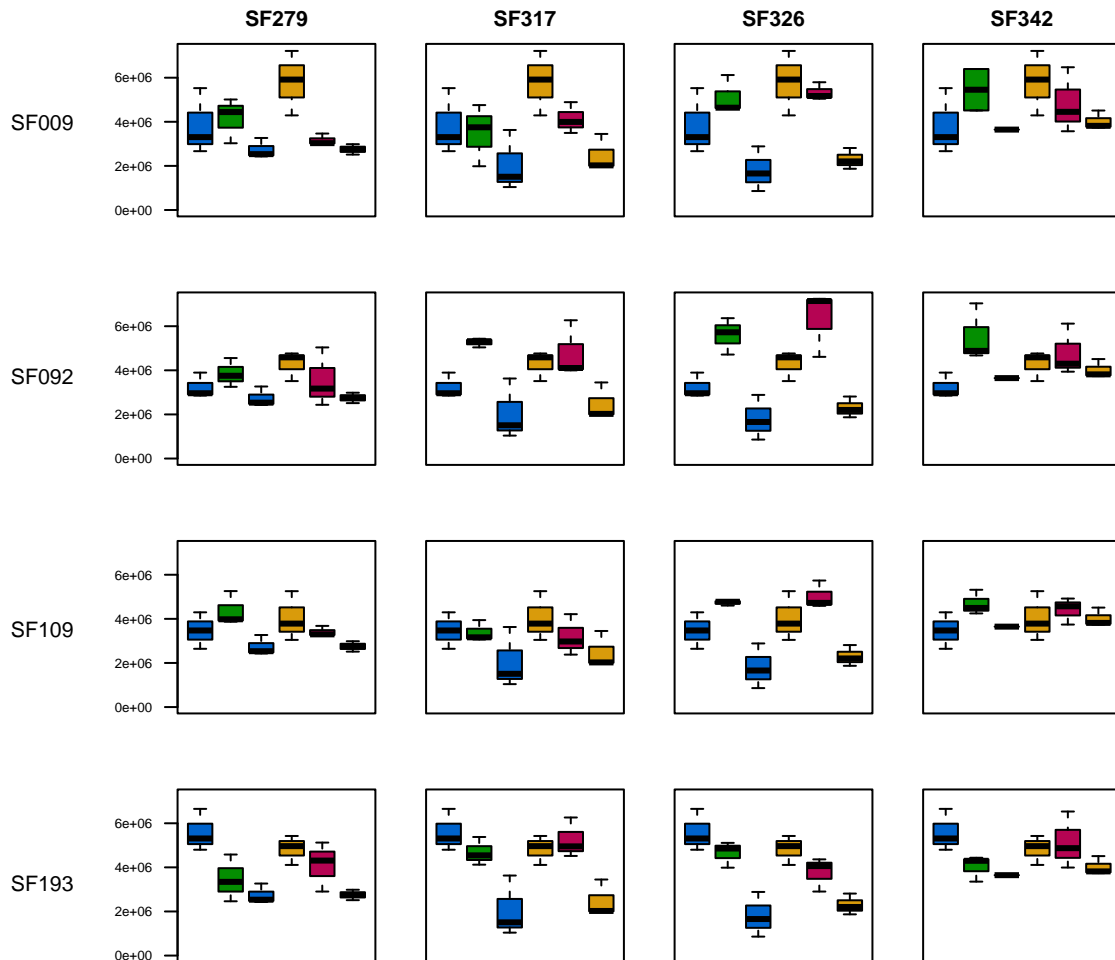

HanXRQChr16g0502021  
Probable calcium sensing receptor

Parents WW  
Parents WD  
Hybrids WW  
Hybrids WD

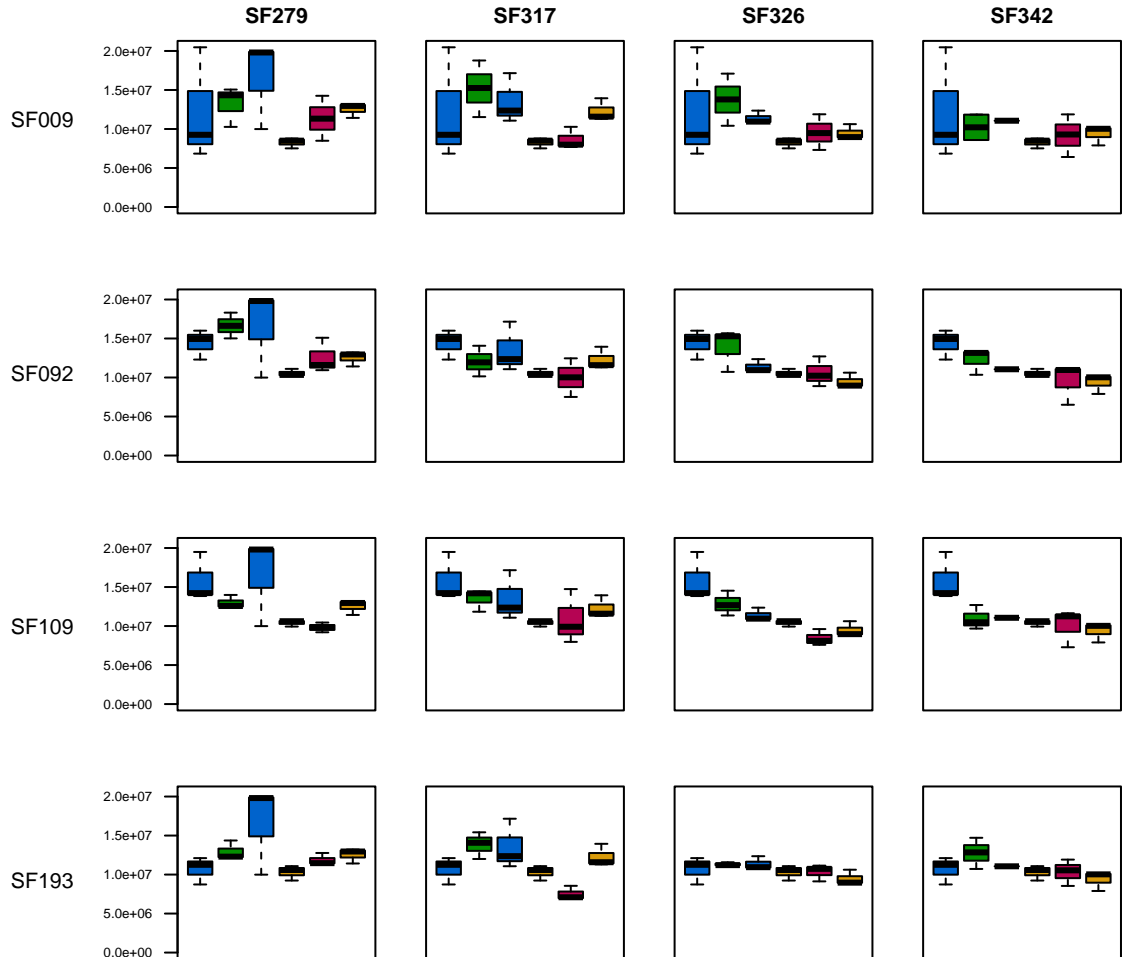

HanXRQChr07g0193781  
 Probable thiamine pyrophosphate  
 dependent pyruvate decarboxylase family p

Parents WW  
 Parents WD  
 Hybrids WW  
 Hybrids WD

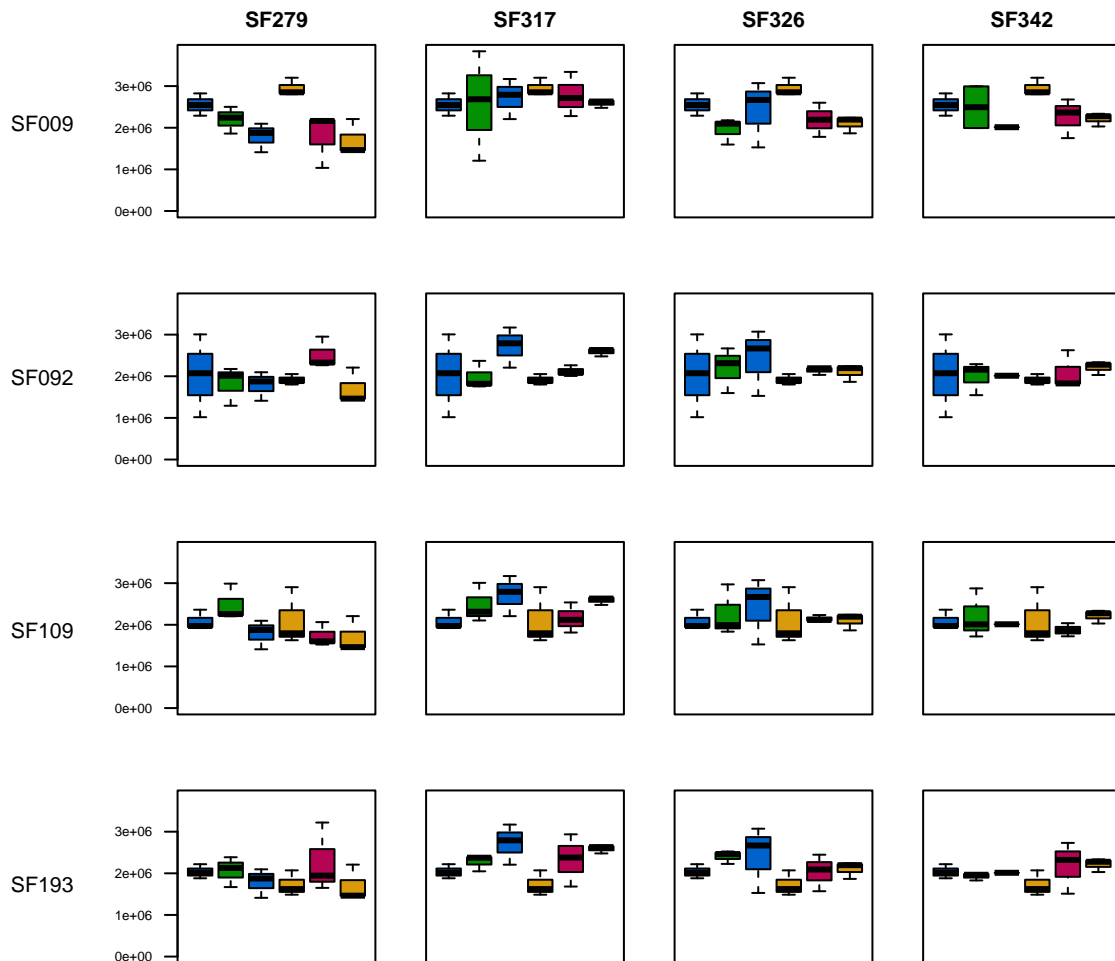

HanXRQChr17g0563781  
Probable beta-amylase

Parents WW  
Parents WD  
Hybrids WW  
Hybrids WD

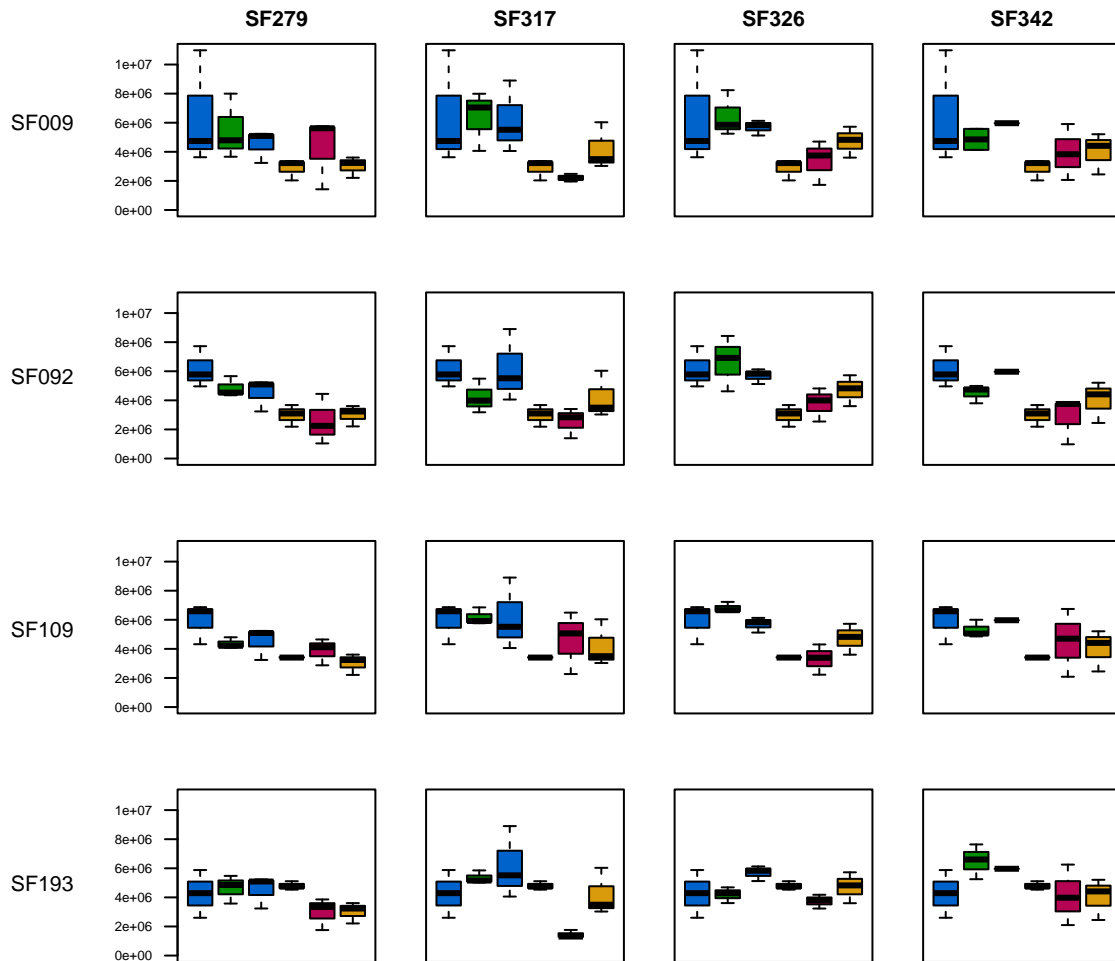

HanXRQChr07g0194741  
Probable S-adenosylmethionine synthase :

Parents WW  
Parents WD  
Hybrids WW  
Hybrids WD

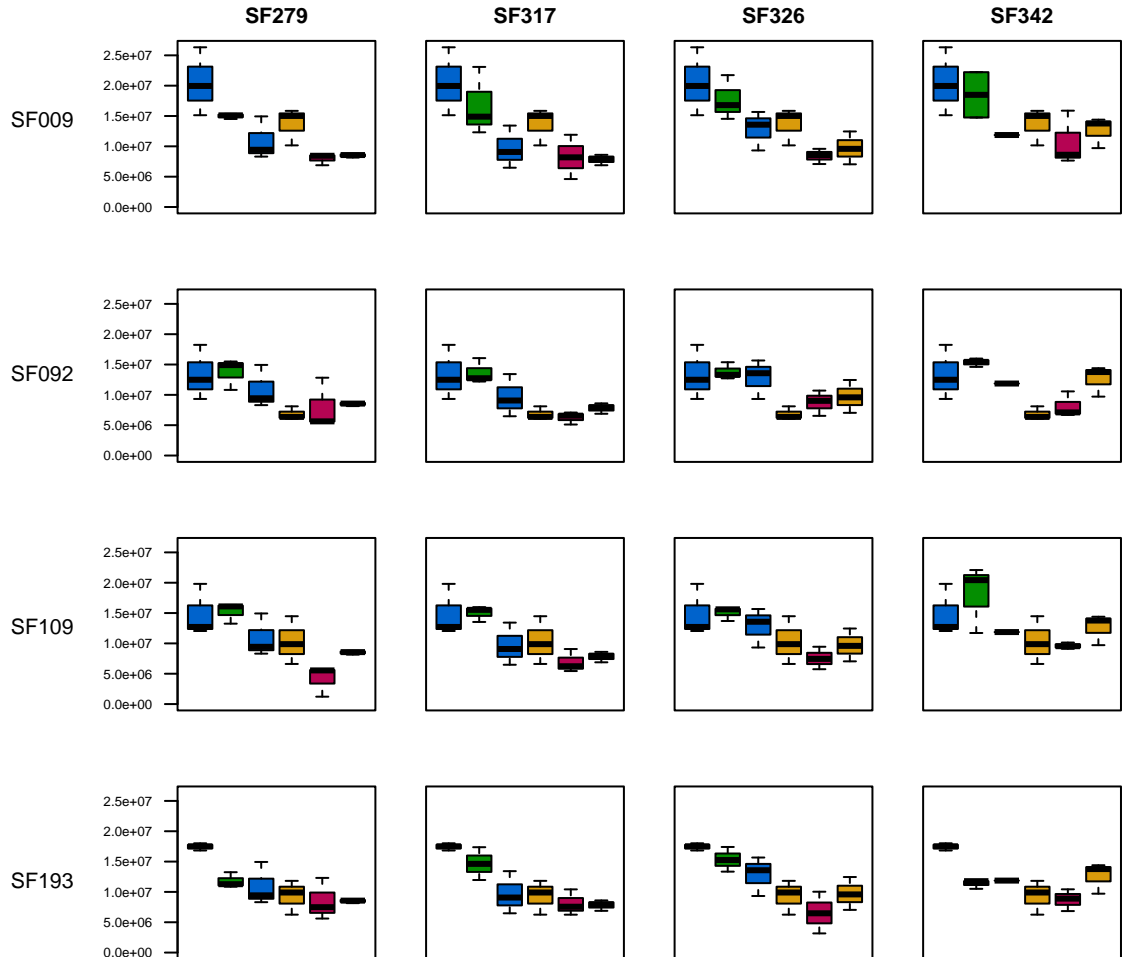

HanXRQChr03g0060701  
Putative ATPase, F0 complex, subunit G,  
mitochondrial

Parents WW  
Parents WD  
Hybrids WW  
Hybrids WD

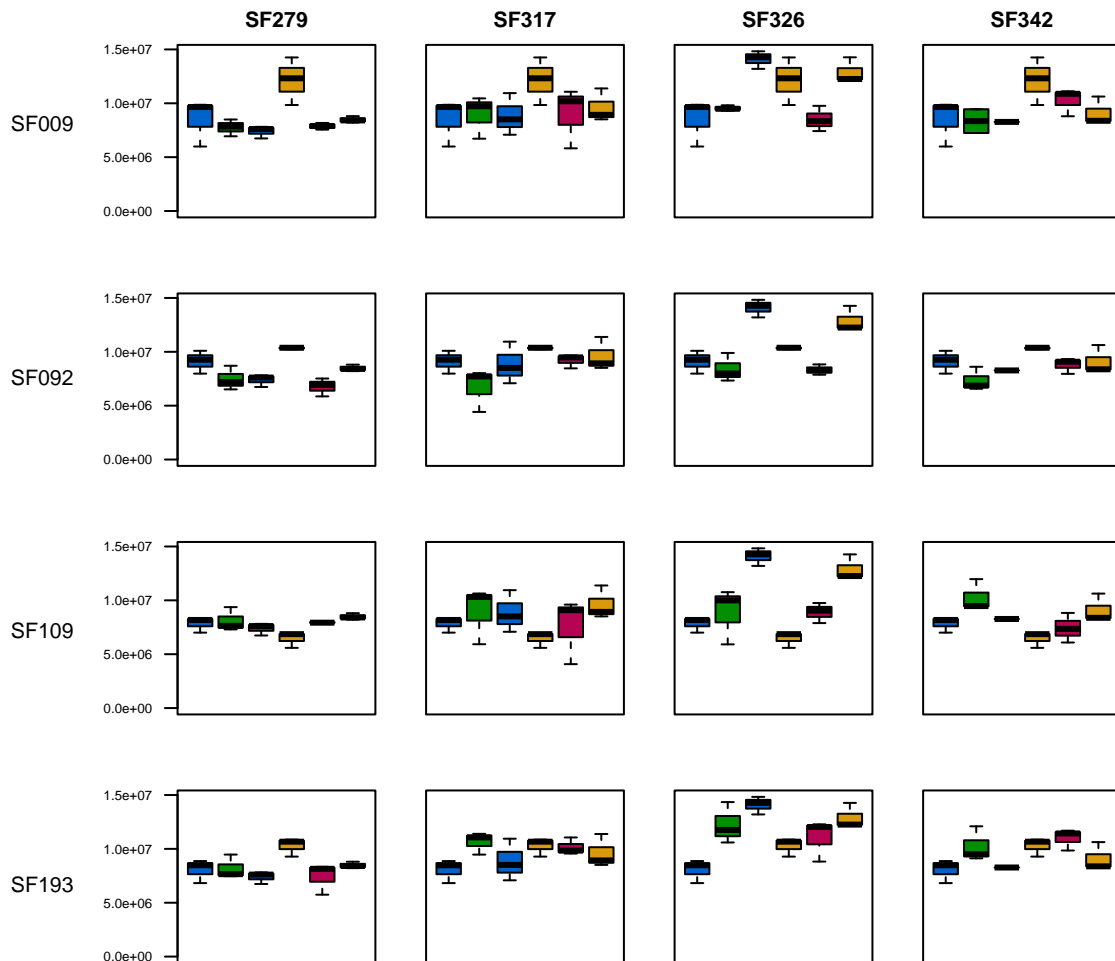



HanXRQChr03g0060811  
 Probable nucleosome/chromatin assembly  
 factor C5

Parents WW  
 Parents WD  
 Hybrids WW  
 Hybrids WD

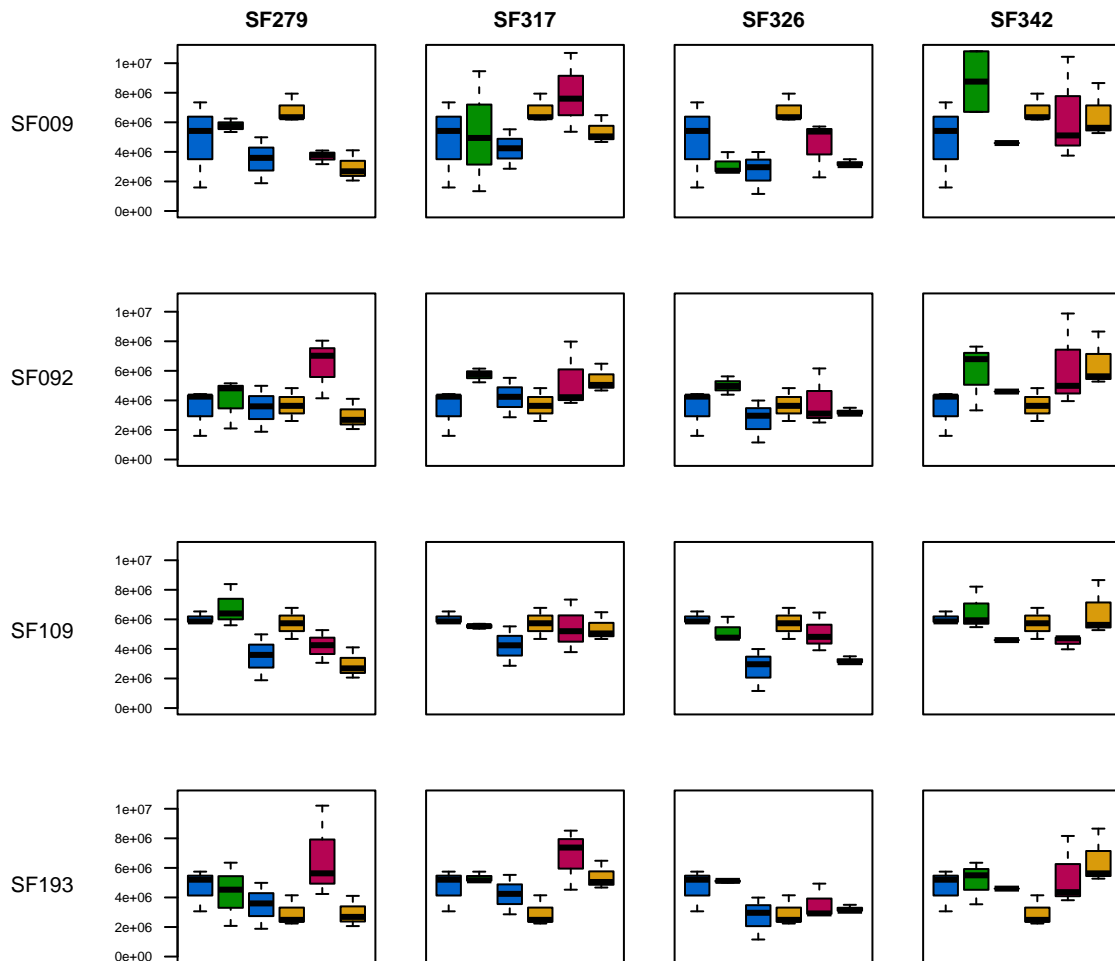

HanXRQChr15g0472661  
 Probable mitochondrial outer membrane  
 protein porin 5

Parents WW  
 Parents WD  
 Hybrids WW  
 Hybrids WD

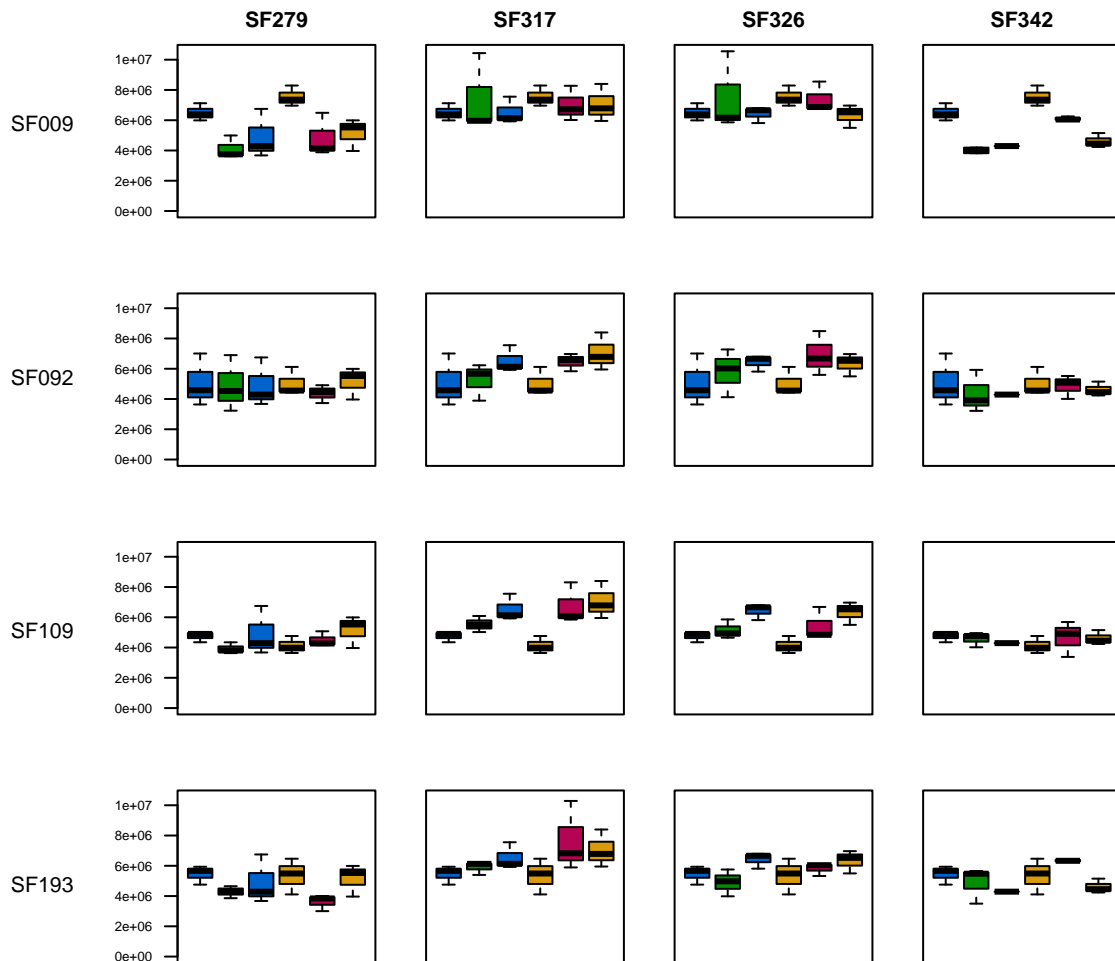

HanXRQChr15g0463511  
Probable non-specific lipid-transfer  
protein 2

Parents WW  
Parents WD  
Hybrids WW  
Hybrids WD

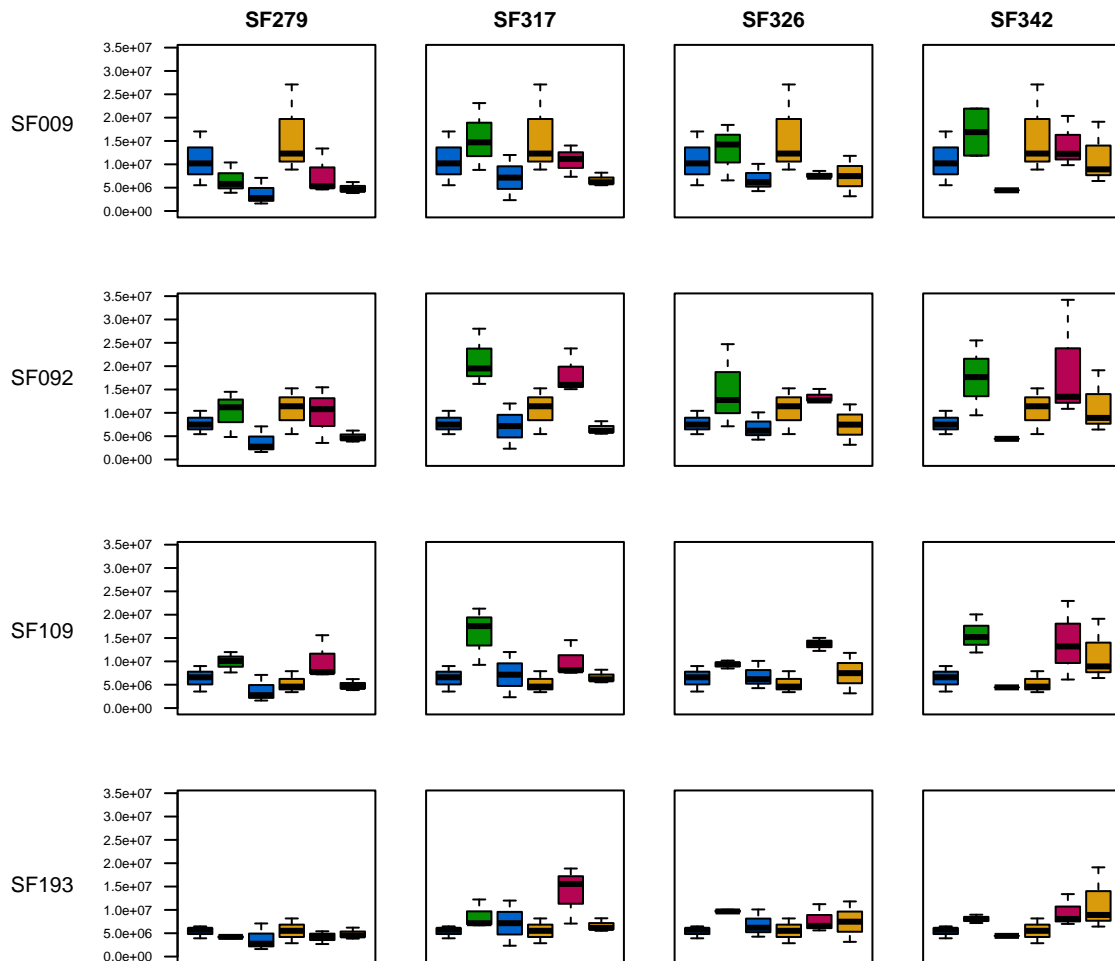

HanXRQChr13g0423671  
Probable beta-galactosidase 10

Parents WW  
Parents WD  
Hybrids WW  
Hybrids WD

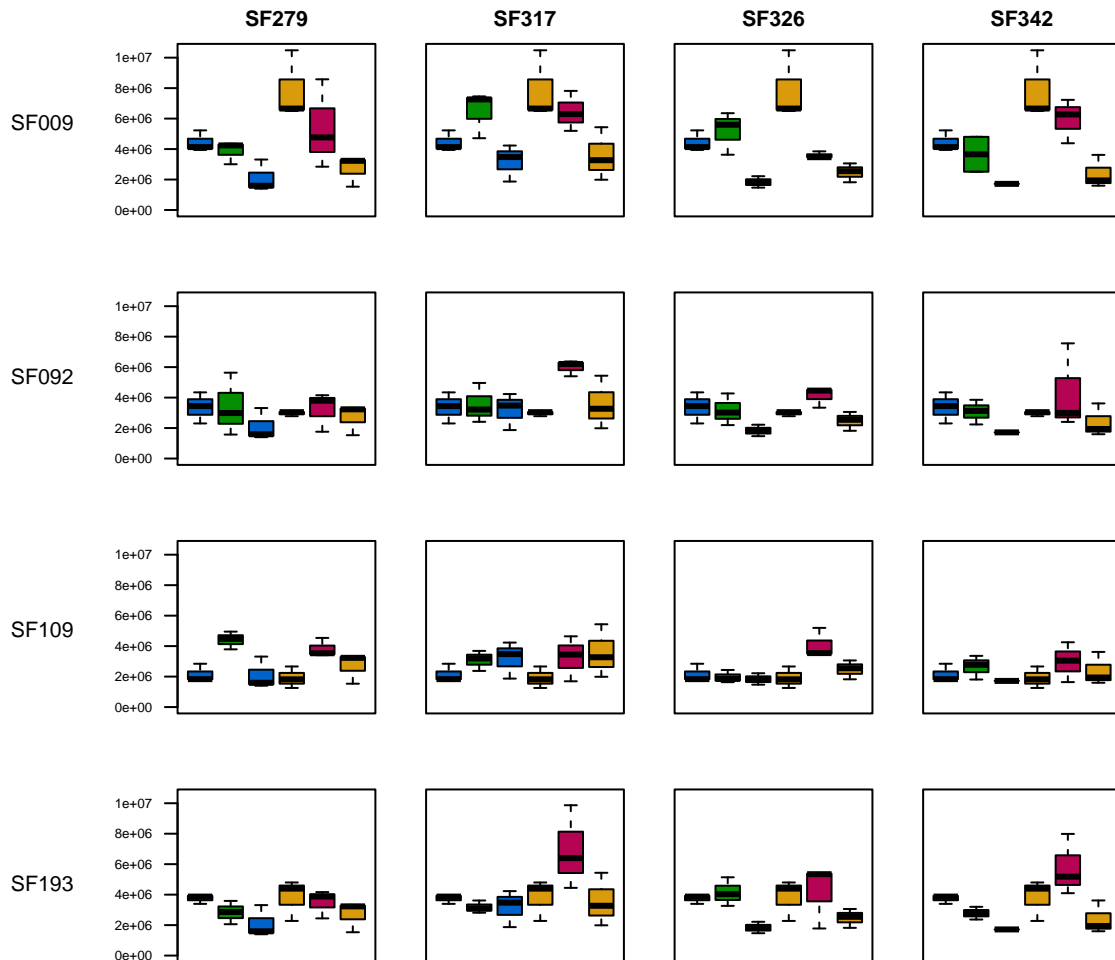

HanXRQChr07g0191921  
Probable alpha-amylase-like 3

Parents WW  
Parents WD  
Hybrids WW  
Hybrids WD

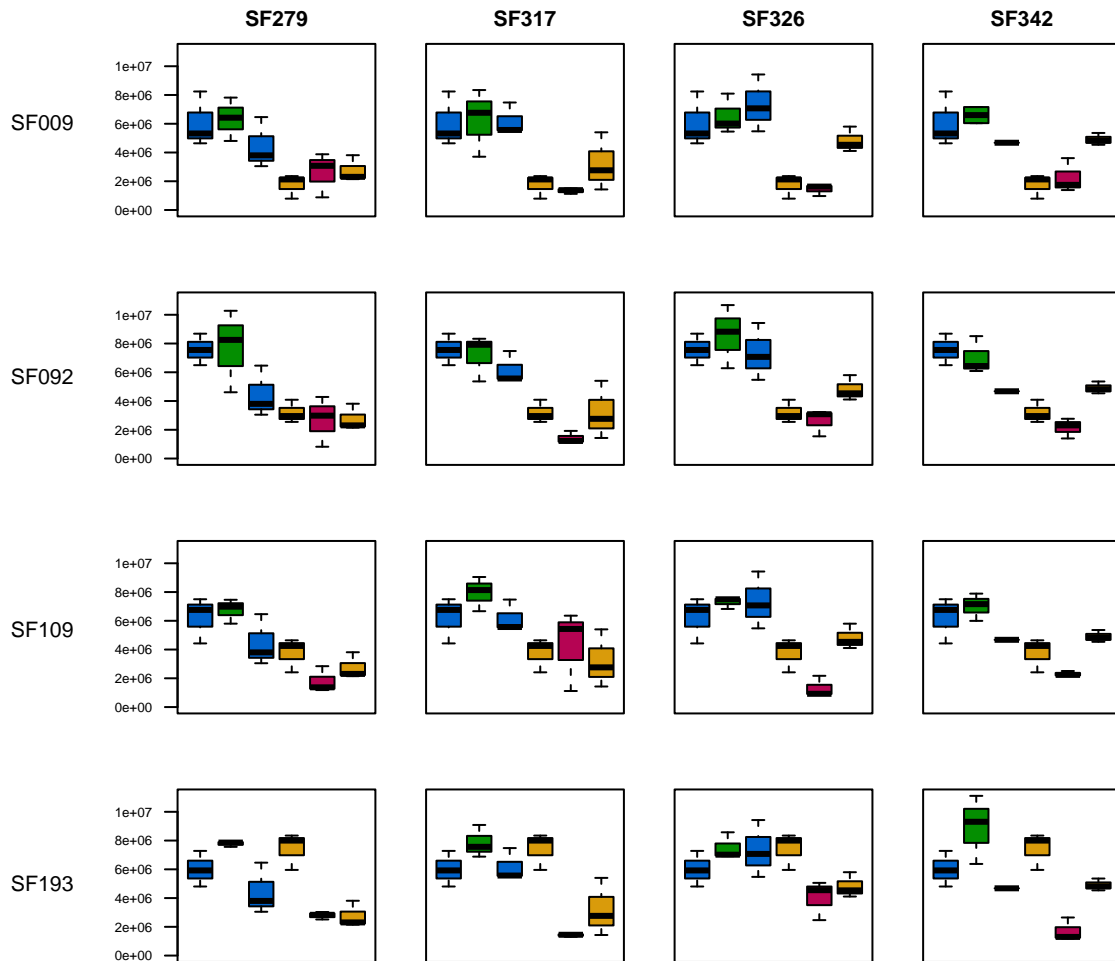

HanXRQChr10g0286481  
Probable flavin containing amine  
oxidoreductase family

Parents WW  
Parents WD  
Hybrids WW  
Hybrids WD

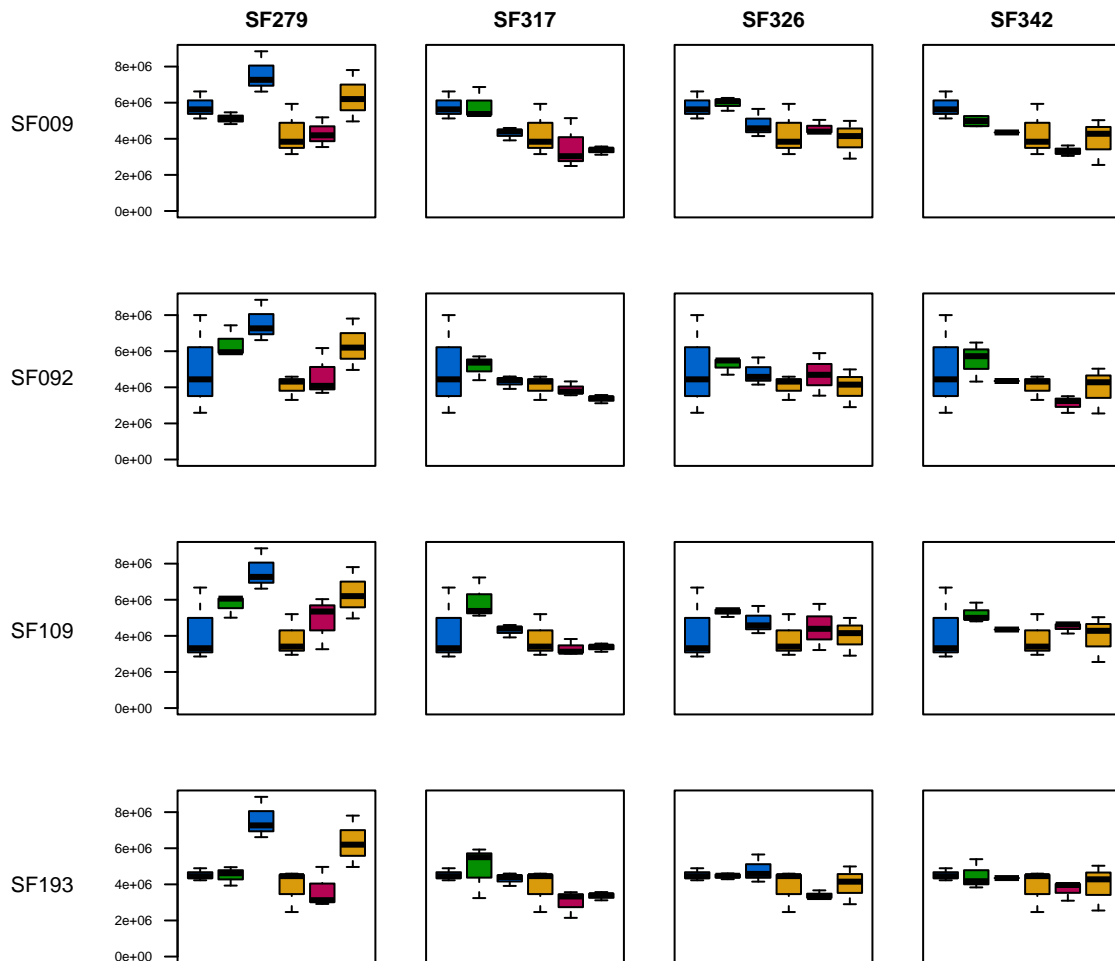

HanXRQChr03g0087851  
Probable aldolase superfamily protein

Parents WW  
Parents WD  
Hybrids WW  
Hybrids WD

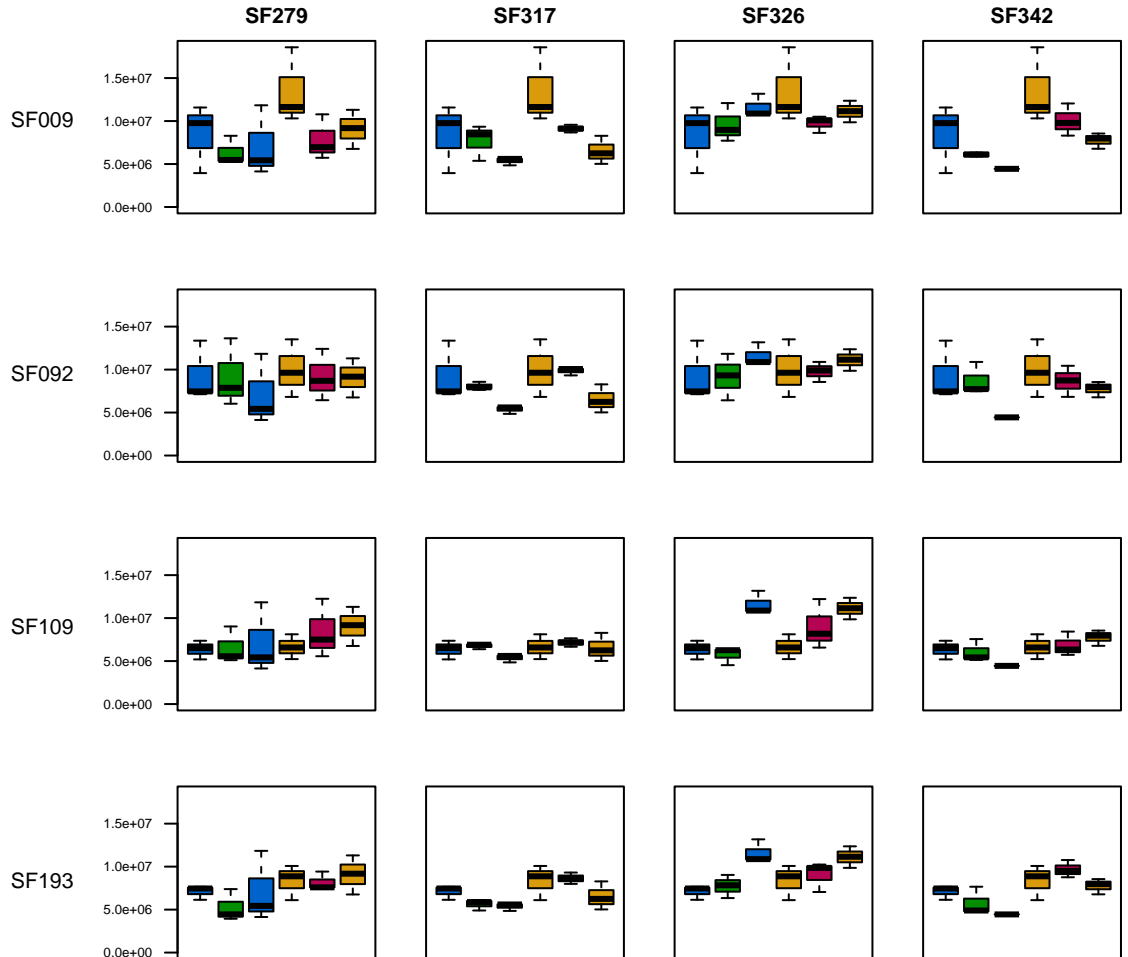

HanXRQChr03g0085961  
Probable monodehydroascorbate reductase  
6

Parents WW  
Parents WD  
Hybrids WW  
Hybrids WD

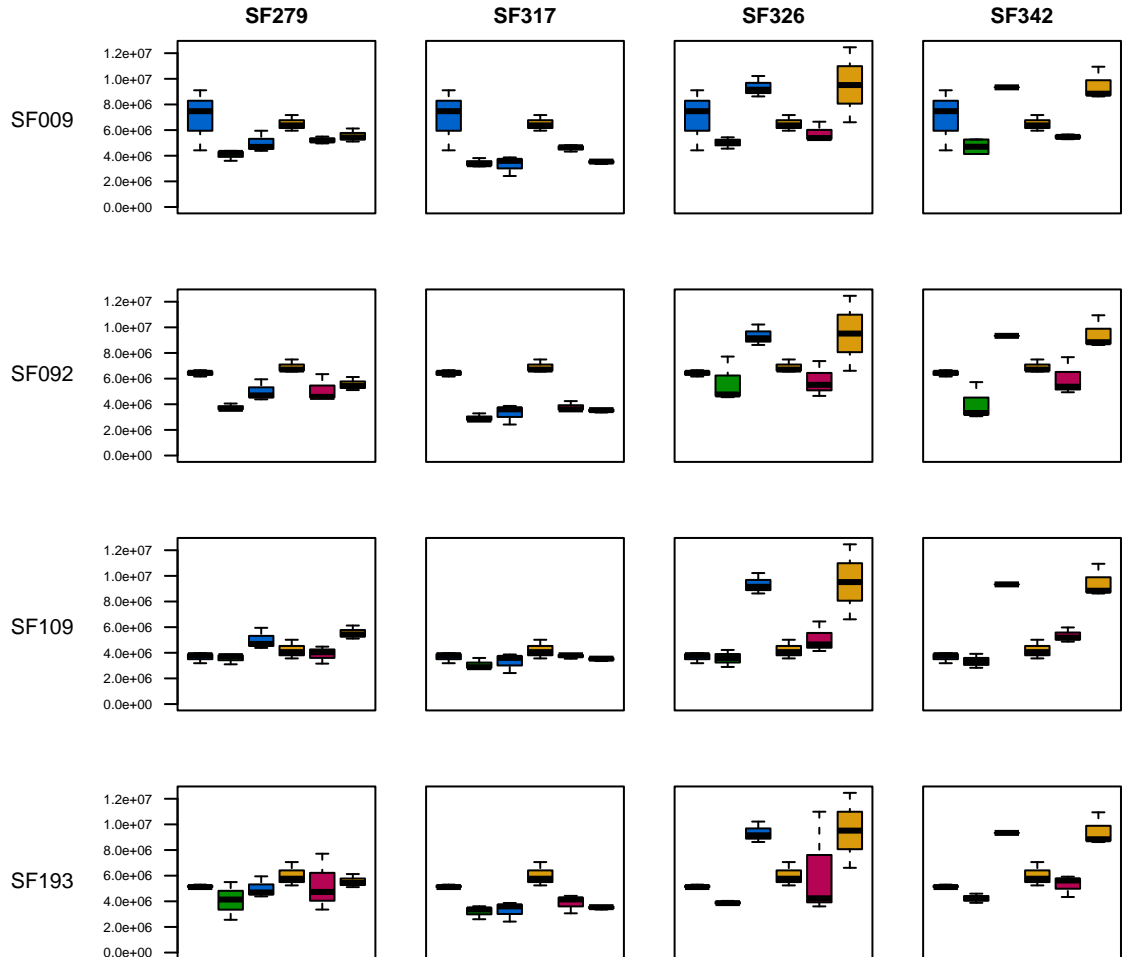



HanXRQChr08g0229051  
Putative ubiquitin/SUMO-activating  
enzyme E1; Ubiquitin-activating enzyme E

Parents WW  
Parents WD  
Hybrids WW  
Hybrids WD

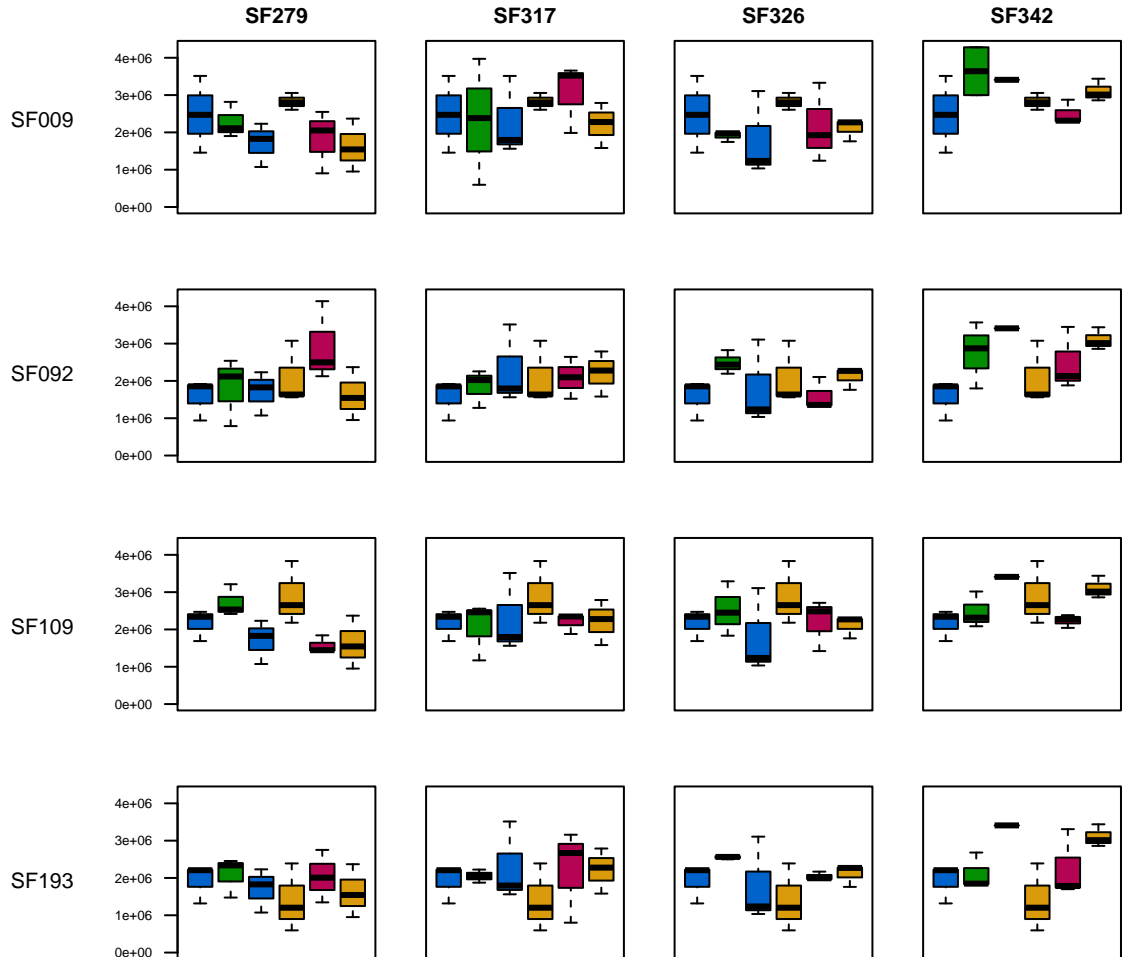

HanXRQChr09g0250891  
Probable phosphoglucose isomerase 1

- Parents WW
- Parents WD
- Hybrids WW
- Hybrids WD

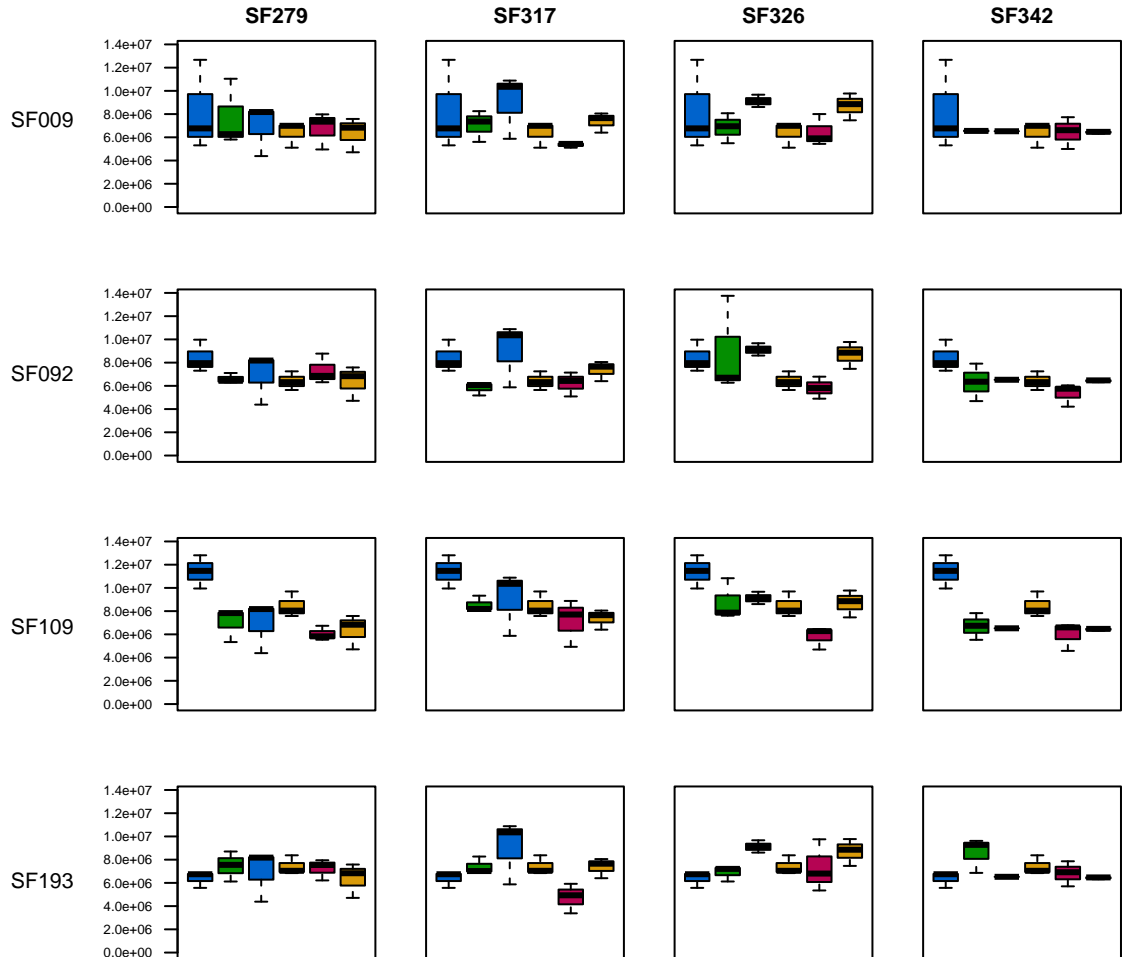

HanXRQCPg0580021  
Putative acetyl-CoA carboxylase  
carboxyl transferase, beta subunit; ClpP/crc

Parents WW  
Parents WD  
Hybrids WW  
Hybrids WD

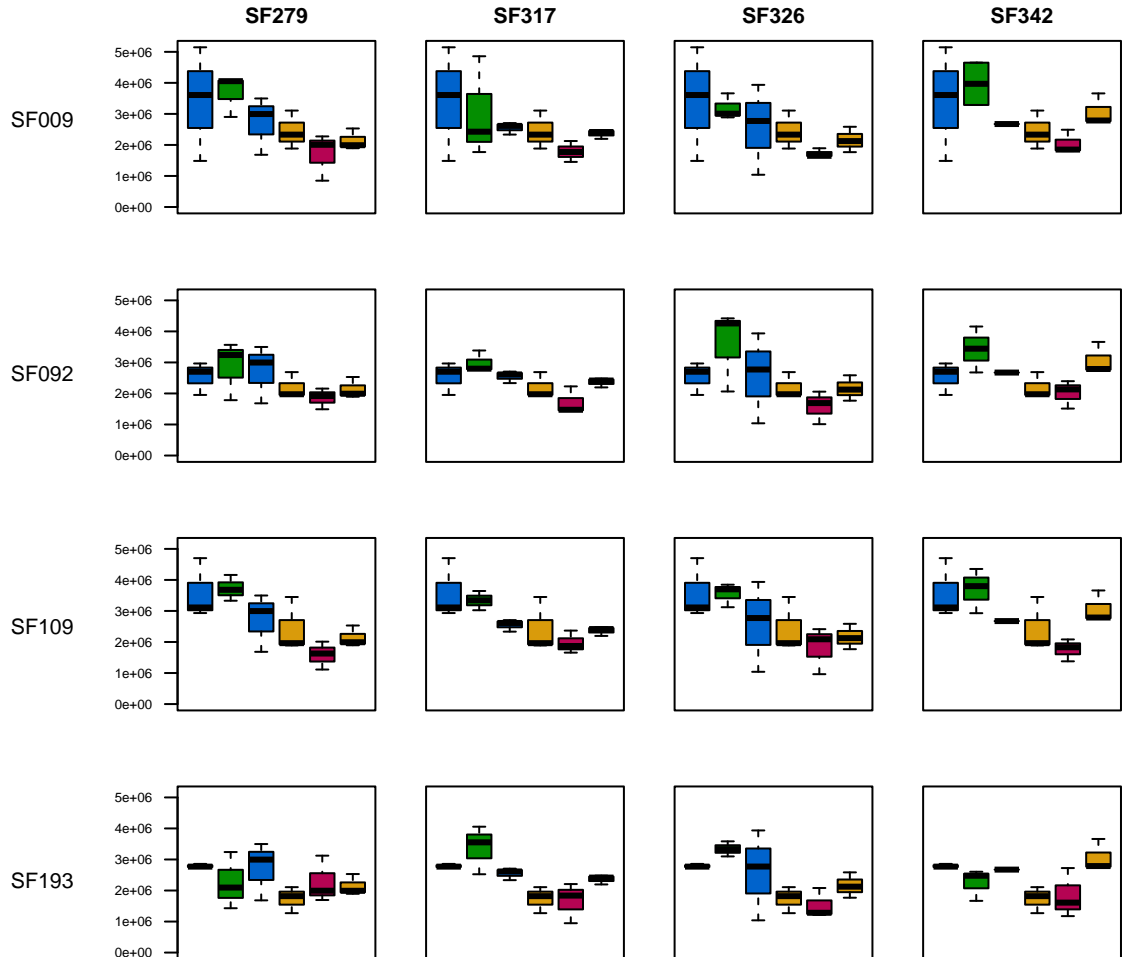

HanXRQChr10g0285091  
 Putative clpP, Ser active site; Clp  
 protease proteolytic subunit /Translocation-

Parents WW  
 Parents WD  
 Hybrids WW  
 Hybrids WD

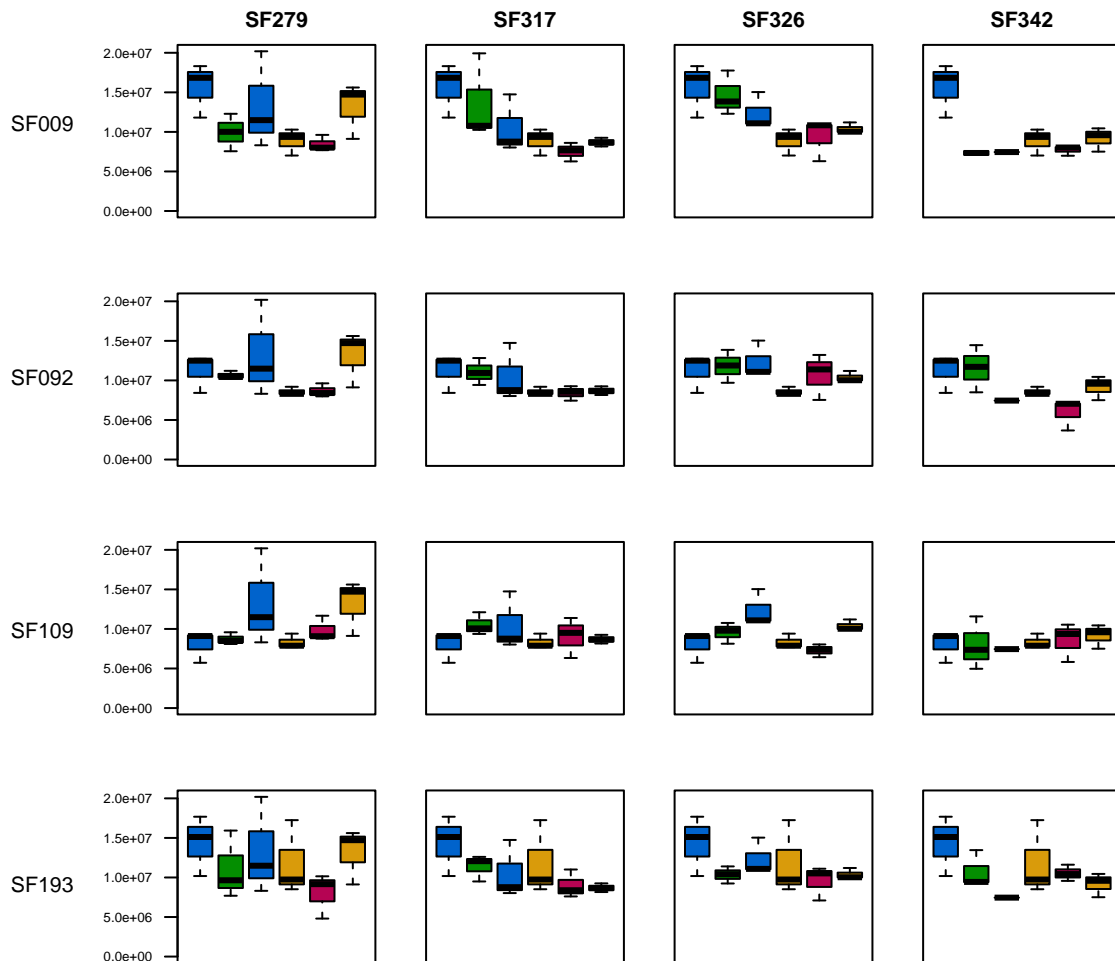

HanXRQChr02g0054161  
Probable NDH-dependent cyclic electron  
flow 1

Parents WW  
Parents WD  
Hybrids WW  
Hybrids WD

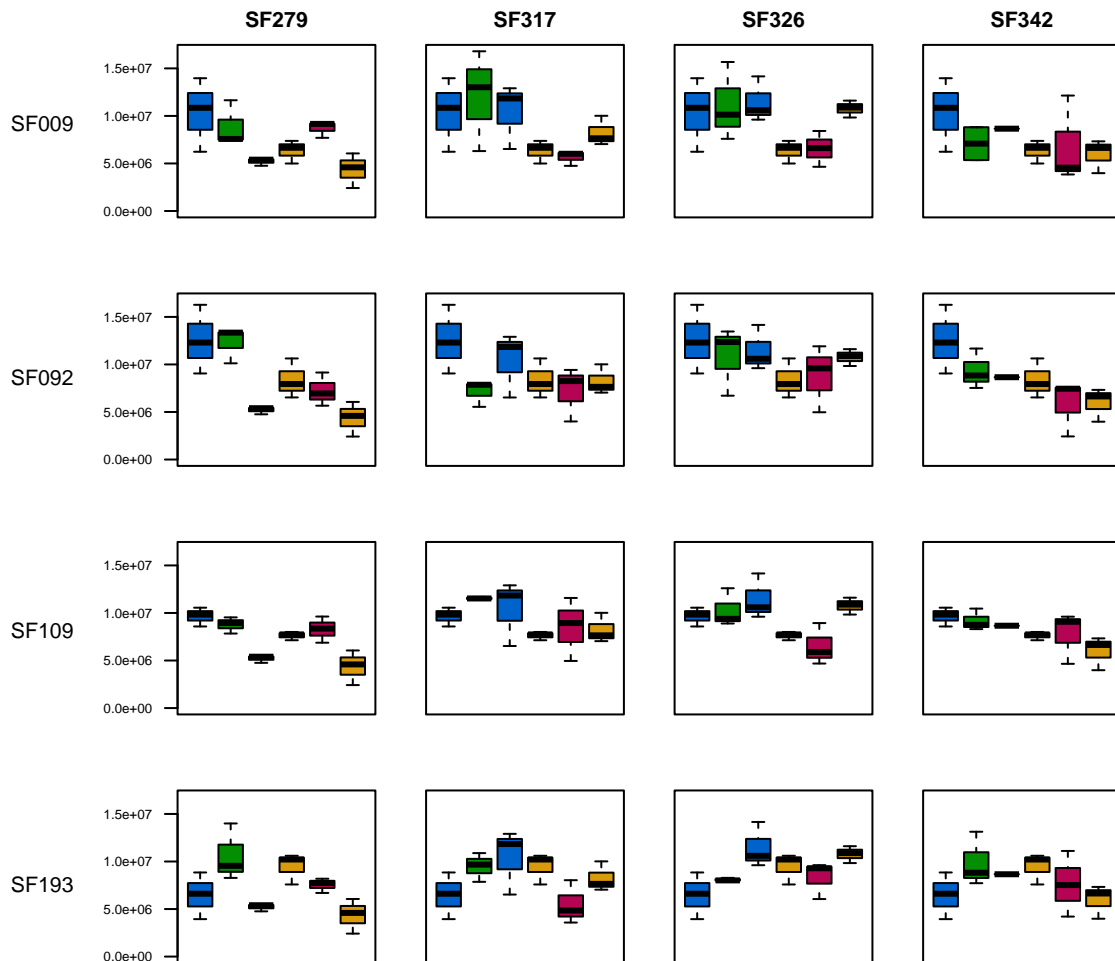

HanXRQChr01g0002771  
Probable DEGP protease 2

Parents WW  
Parents WD  
Hybrids WW  
Hybrids WD

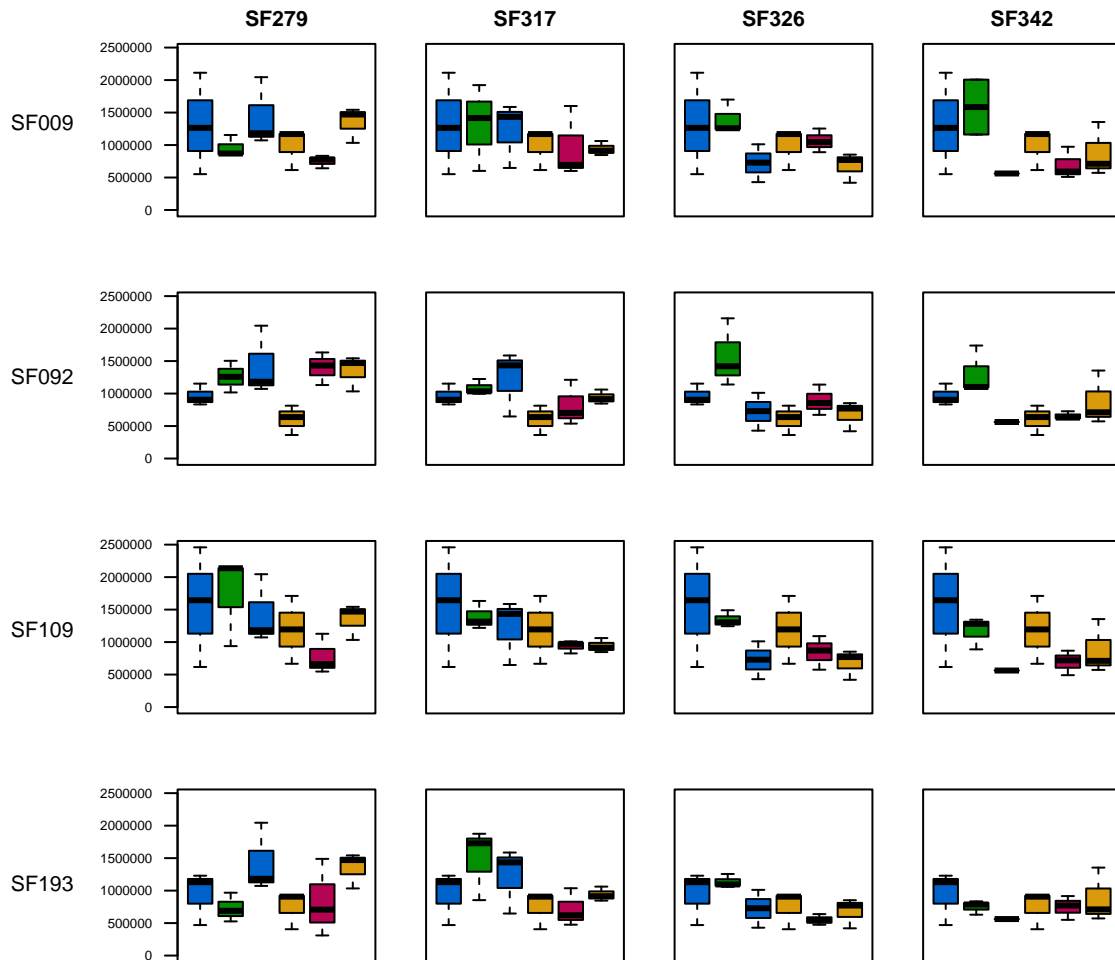

HanXRQCPg0580201  
Putative ribosomal protein L14b/L23e;  
Ribosomal protein L14 domain

Parents WW  
Parents WD  
Hybrids WW  
Hybrids WD

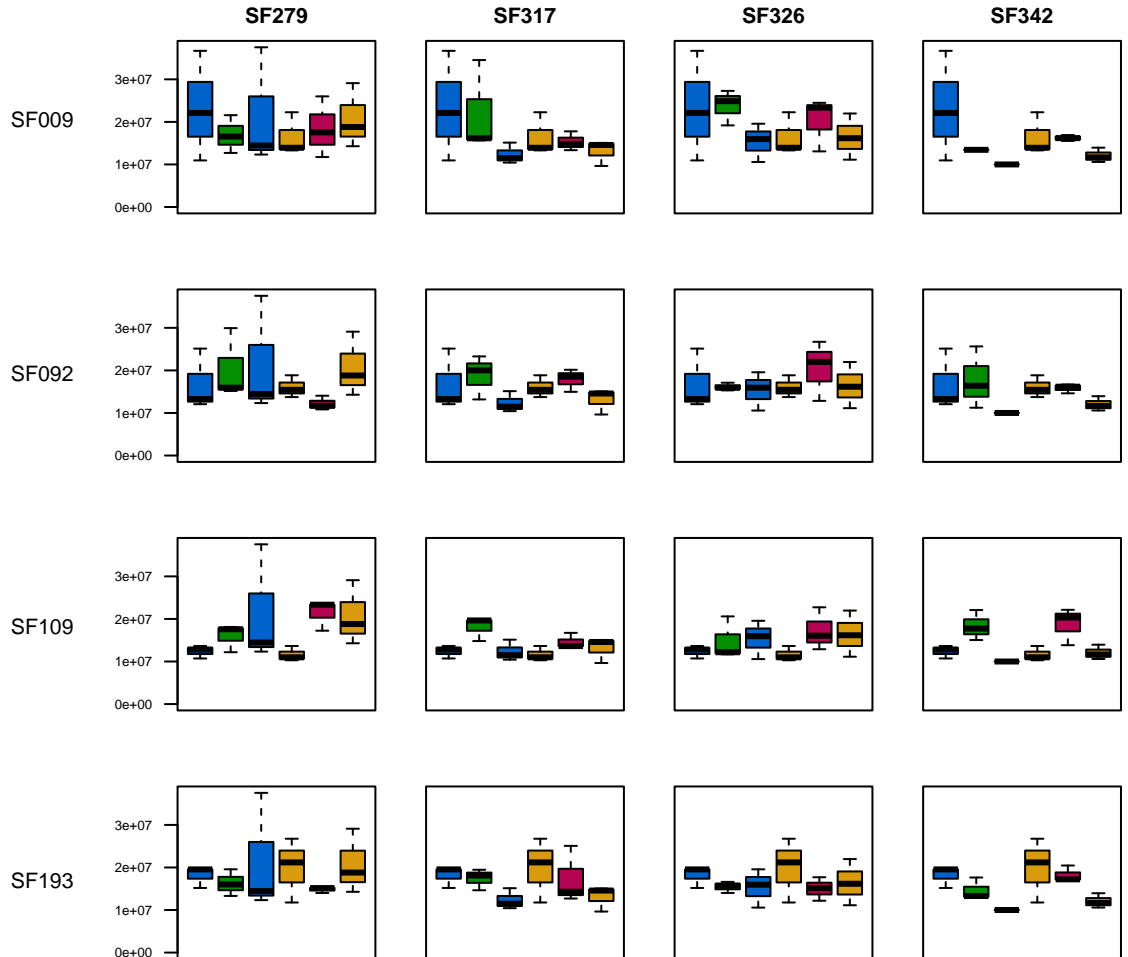

HanXRQChr11g0351041  
Probable MLP-like protein 423

Parents WW  
Parents WD  
Hybrids WW  
Hybrids WD

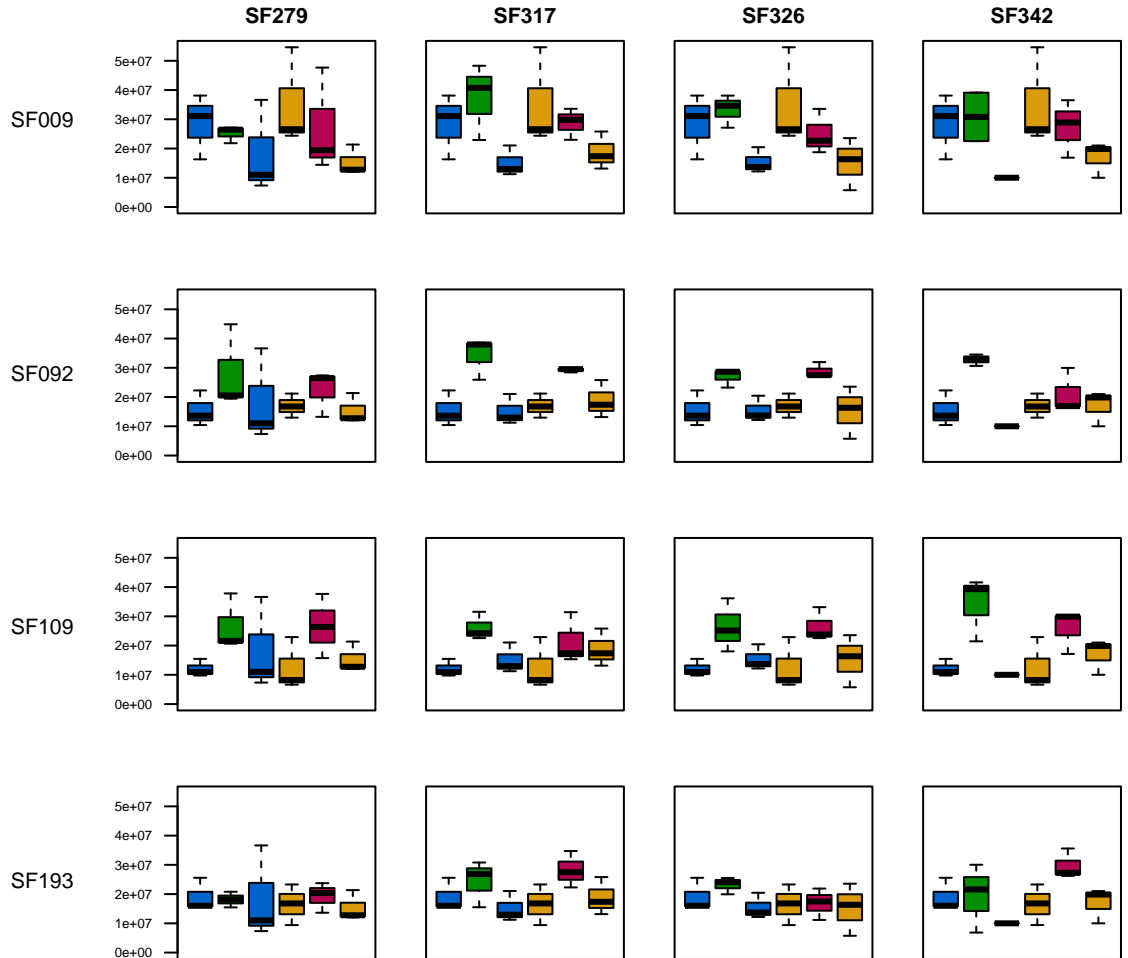



HanXRQChr14g0460961  
 Probable  
 metallo-hydrolase/oxidoreductase superfan

Parents WW  
 Parents WD  
 Hybrids WW  
 Hybrids WD

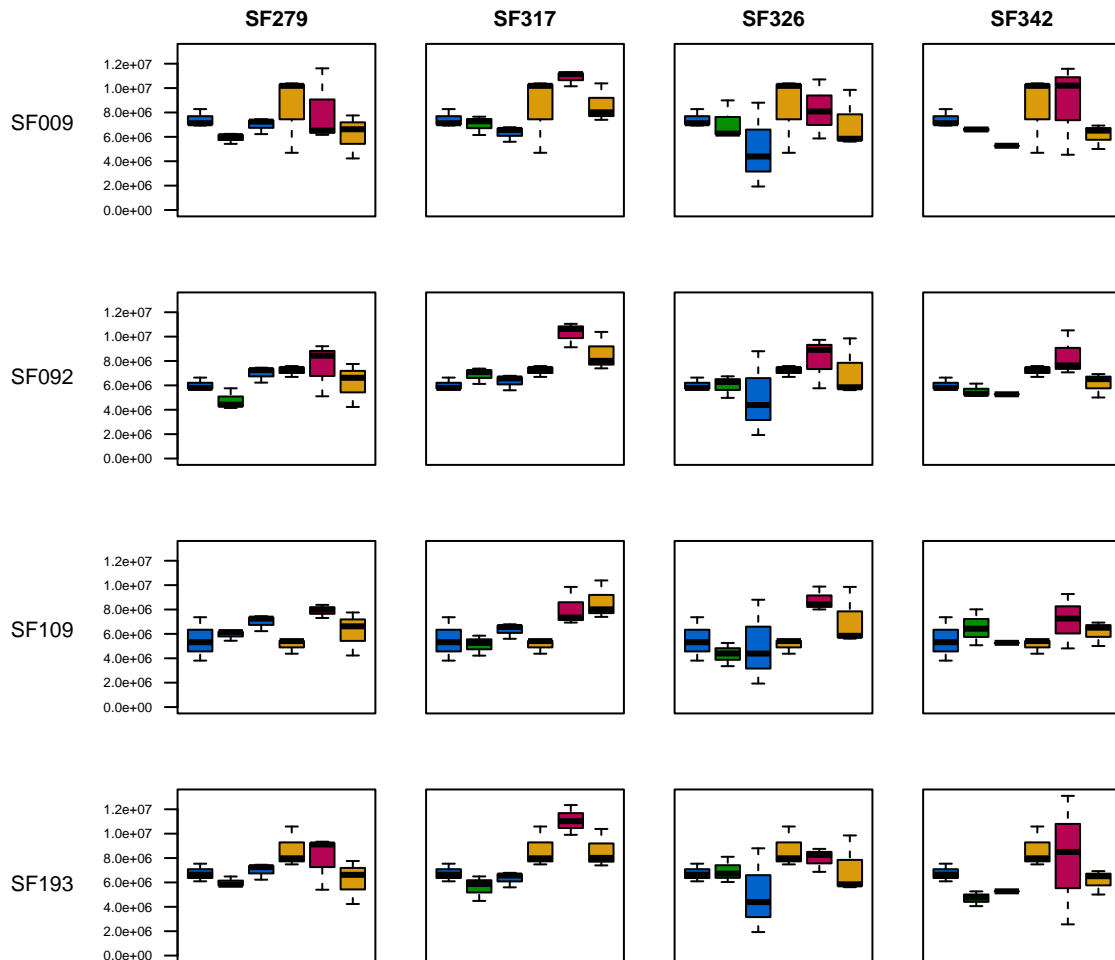

HanXRQChr08g0233371  
 Probable FASCICLIN-like arabinogalactan  
 1

Parents WW  
 Parents WD  
 Hybrids WW  
 Hybrids WD

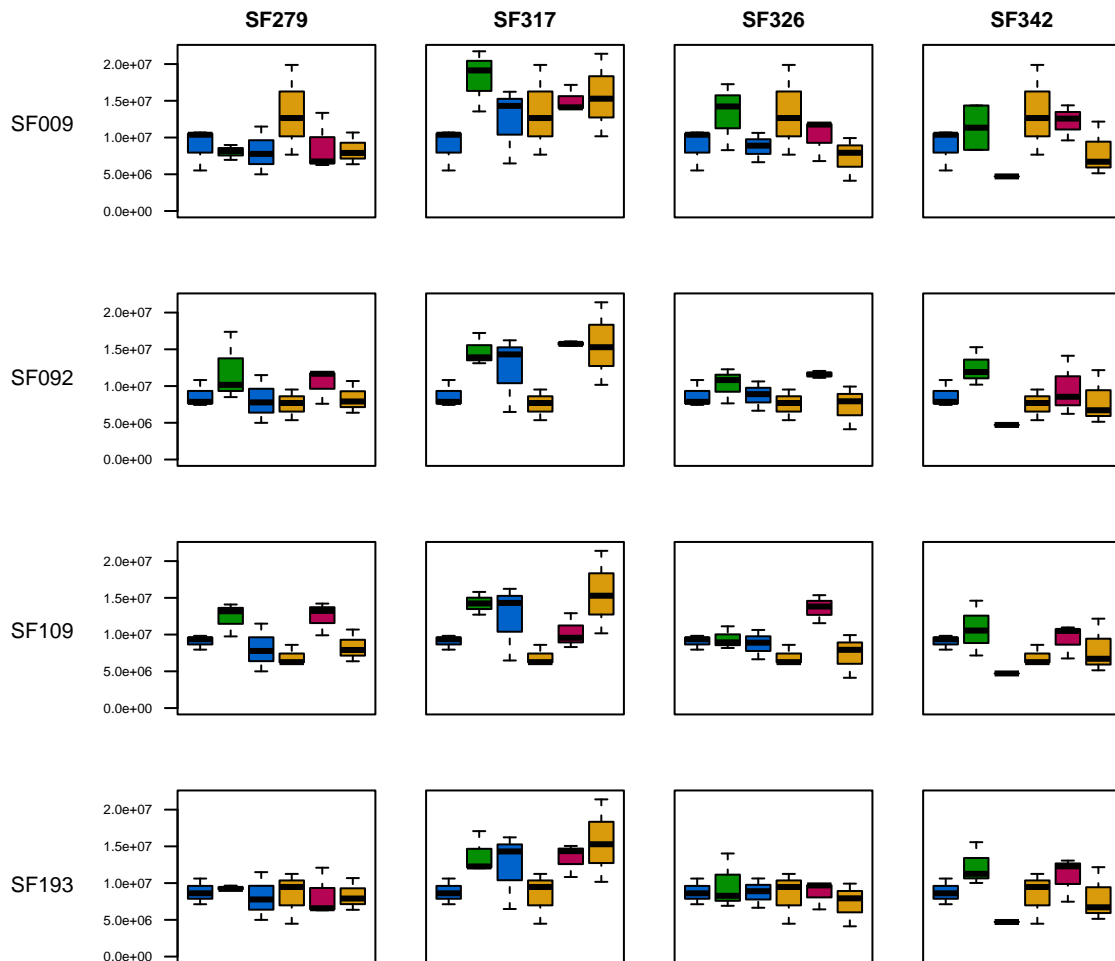

HanXRQChr05g0148271  
Probable adenine nucleotide alpha  
hydrolases-like superfamily protein

Parents WW  
Parents WD  
Hybrids WW  
Hybrids WD

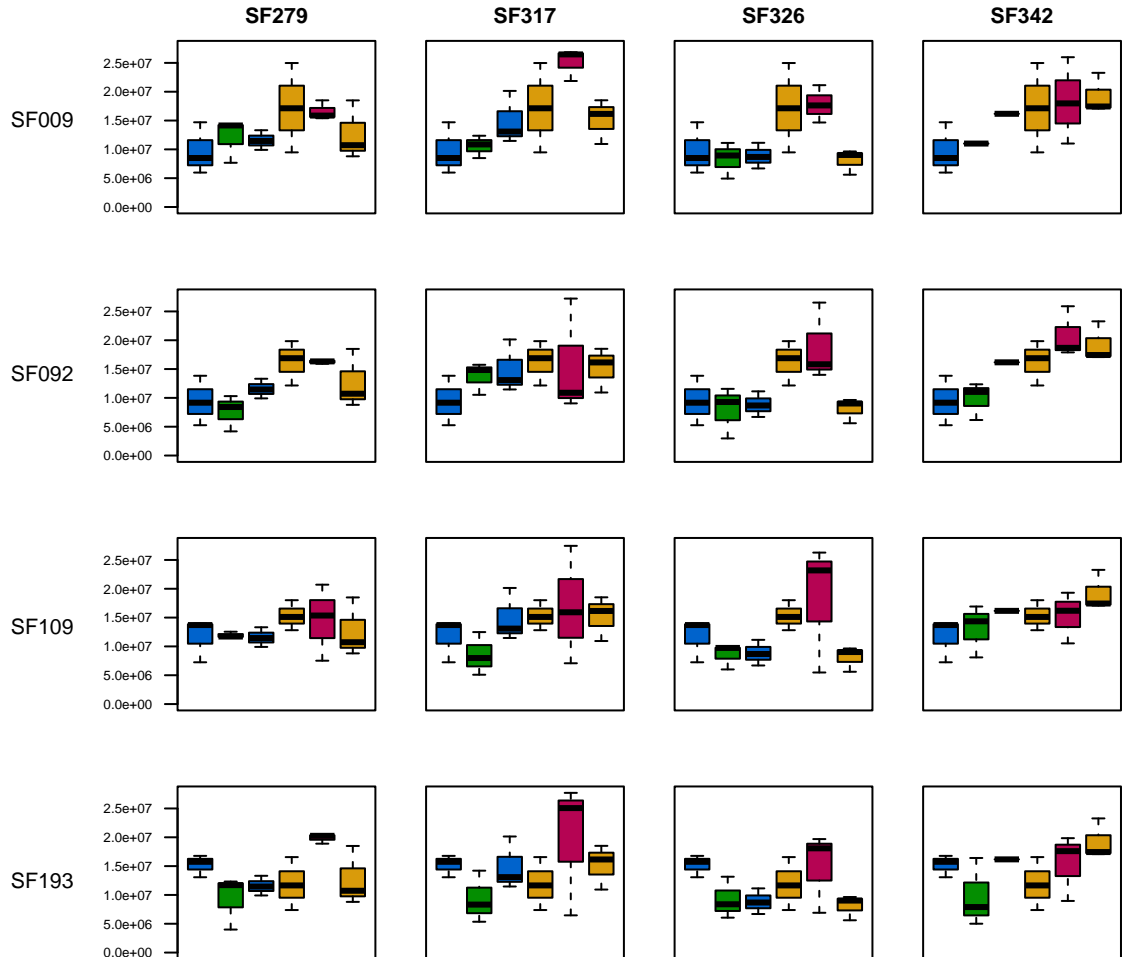

HanXRQChr15g0494531  
Probable adenine nucleotide alpha  
hydrolases-like superfamily protein

Parents WW  
Parents WD  
Hybrids WW  
Hybrids WD

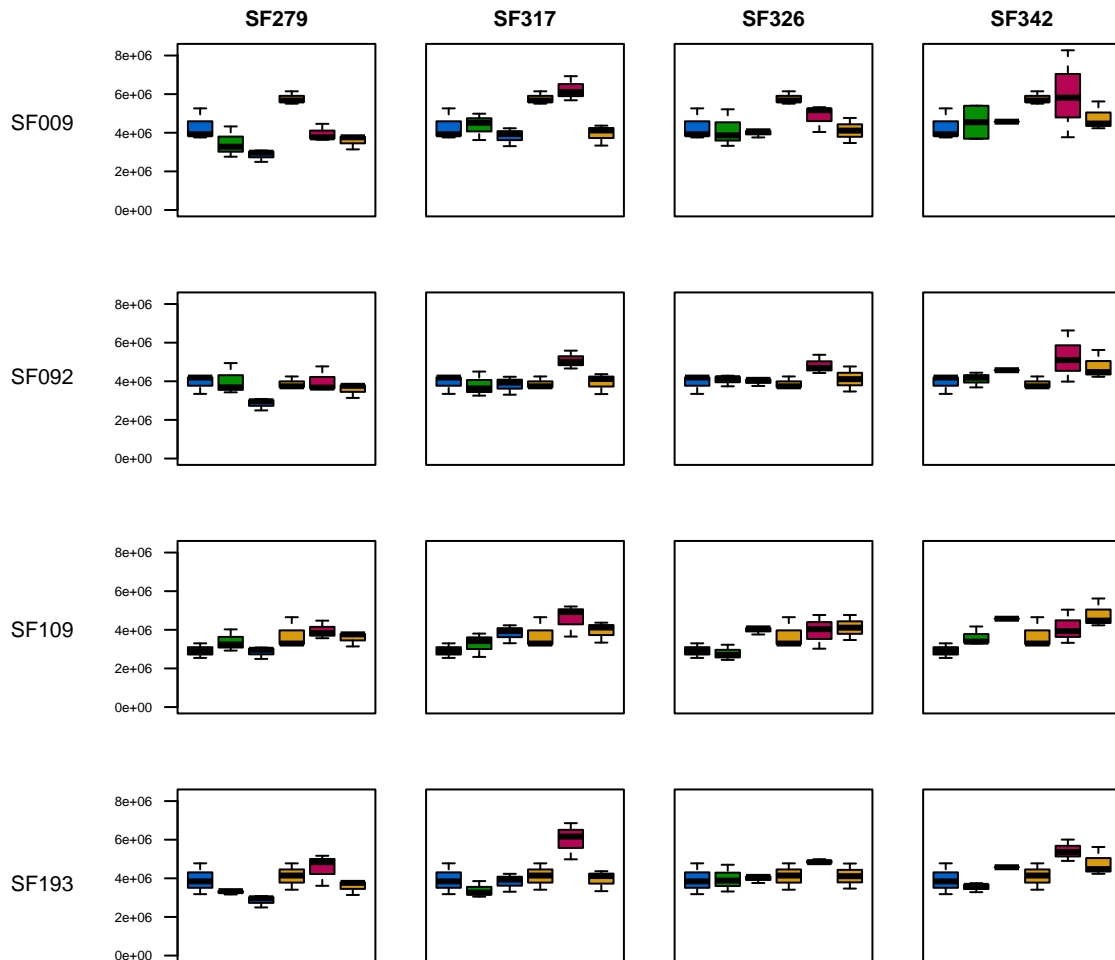

HanXRQChr11g0335601  
Probable mercaptopyruvate  
sulfurtransferase 1

Parents WW  
Parents WD  
Hybrids WW  
Hybrids WD

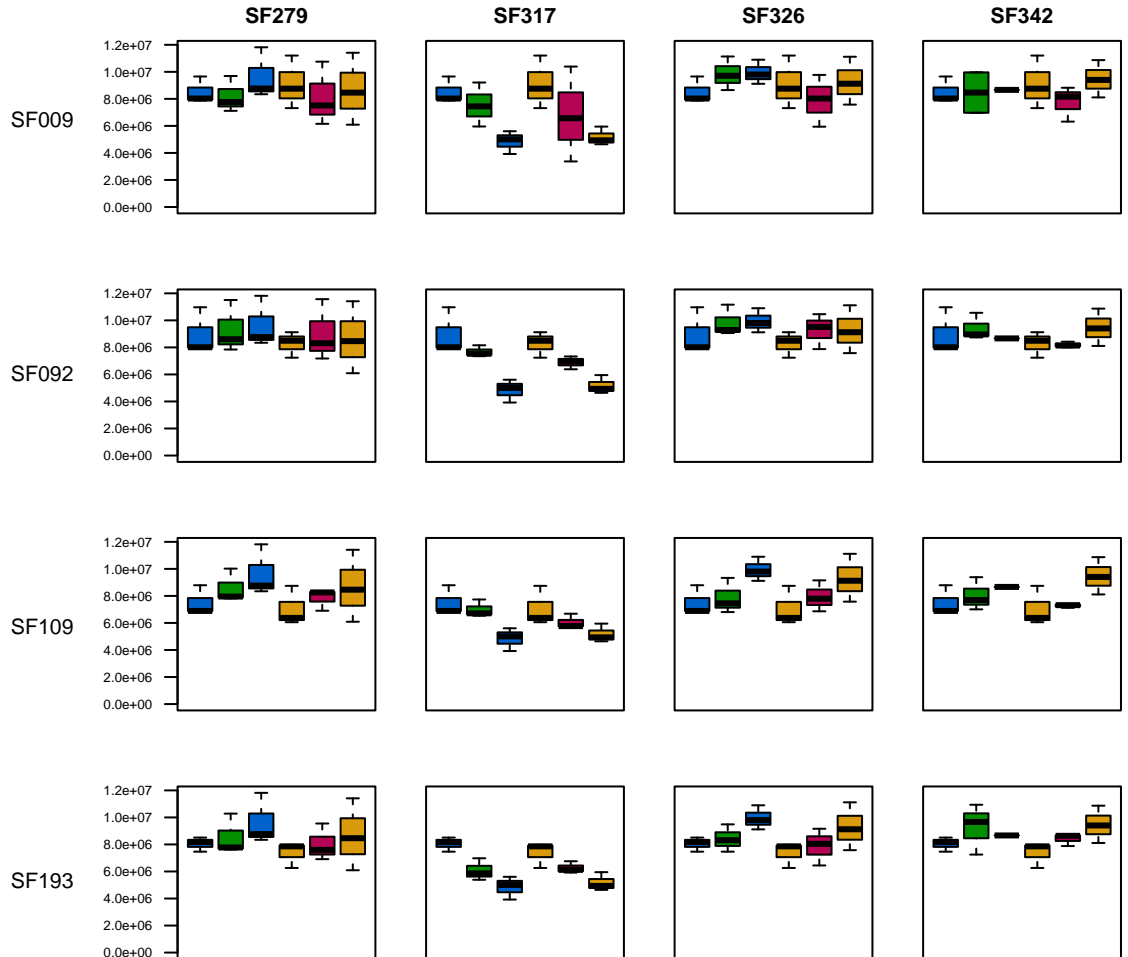

HanXRQChr10g0295961  
 Probable chlorophyll a-b binding  
 protein CP24, chloroplastic

Parents WW  
 Parents WD  
 Hybrids WW  
 Hybrids WD

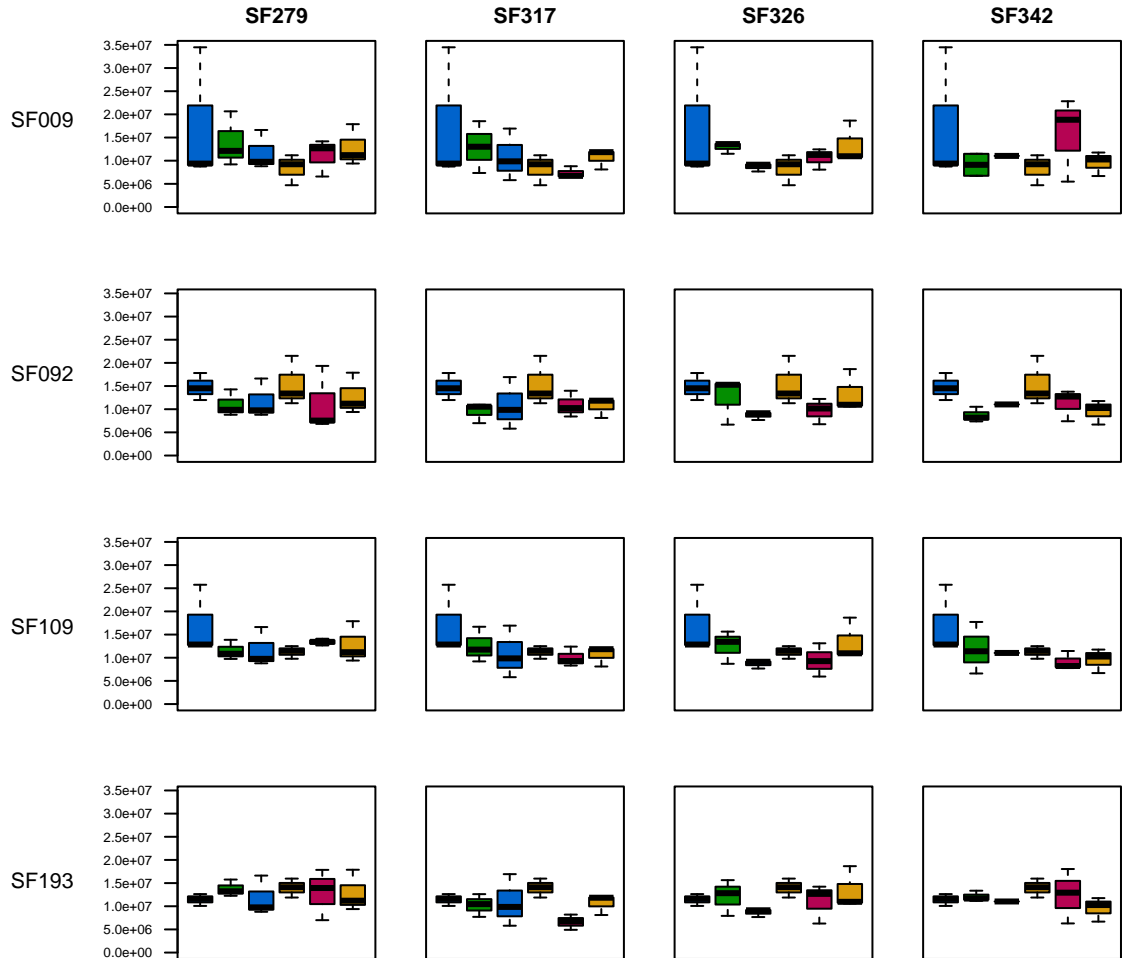

HanXRQChr11g0343611  
Probable 10 kDa chaperonin

Parents WW  
Parents WD  
Hybrids WW  
Hybrids WD

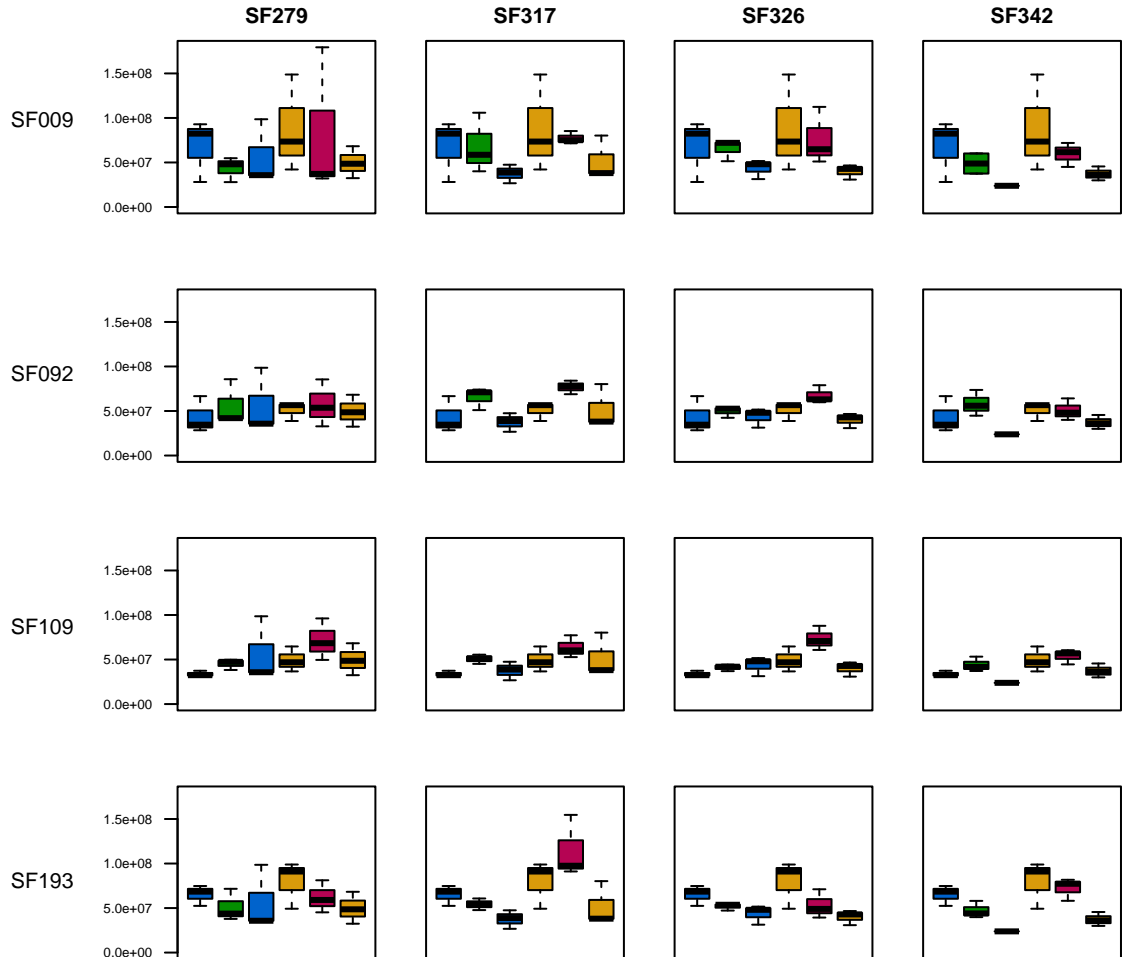

HanXRQChr14g0455851  
Probable small nuclear  
ribonucleoprotein F

Parents WW  
Parents WD  
Hybrids WW  
Hybrids WD

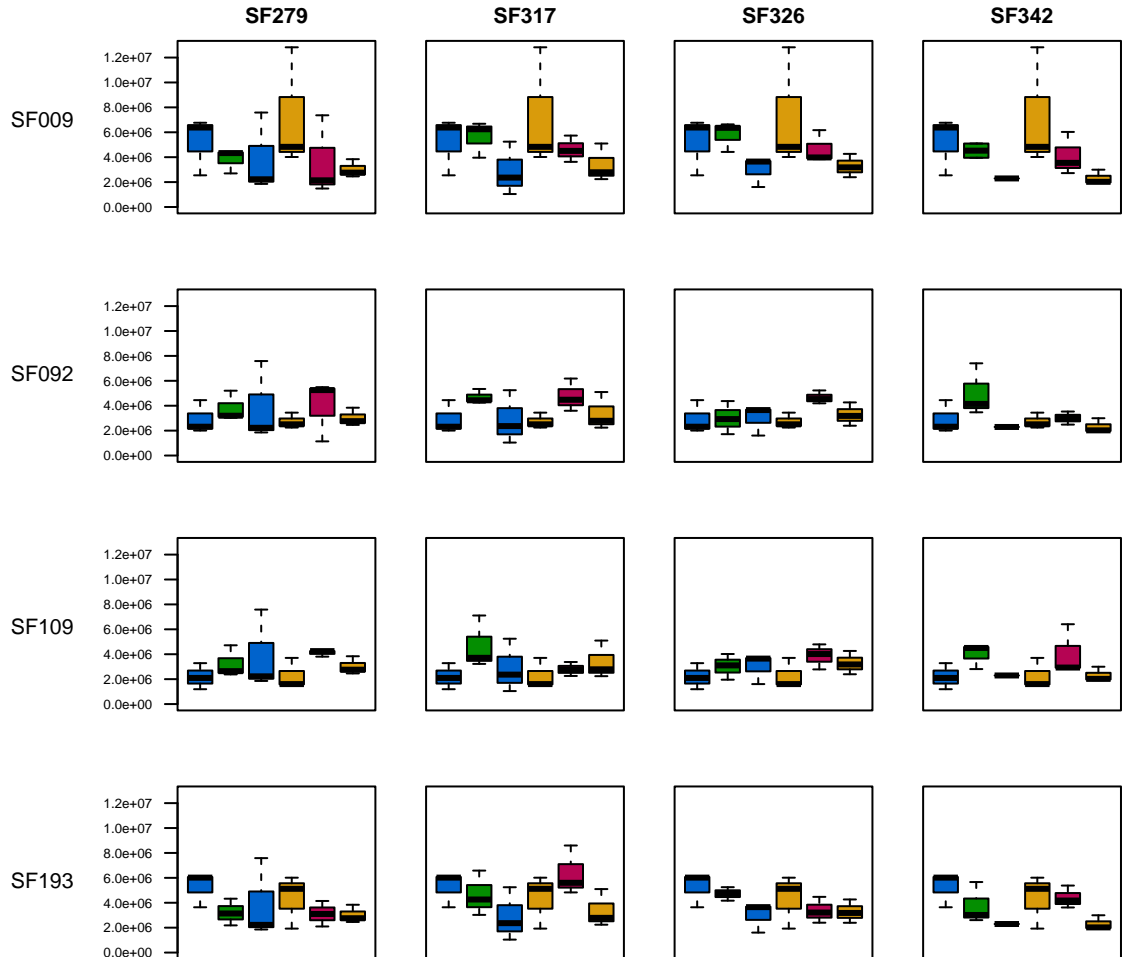



HanXRQChr13g0387351  
 Probable glutamyl-tRNA(Gln)  
 amidotransferase subunit A, chloroplastic/r

Parents WW  
 Parents WD  
 Hybrids WW  
 Hybrids WD

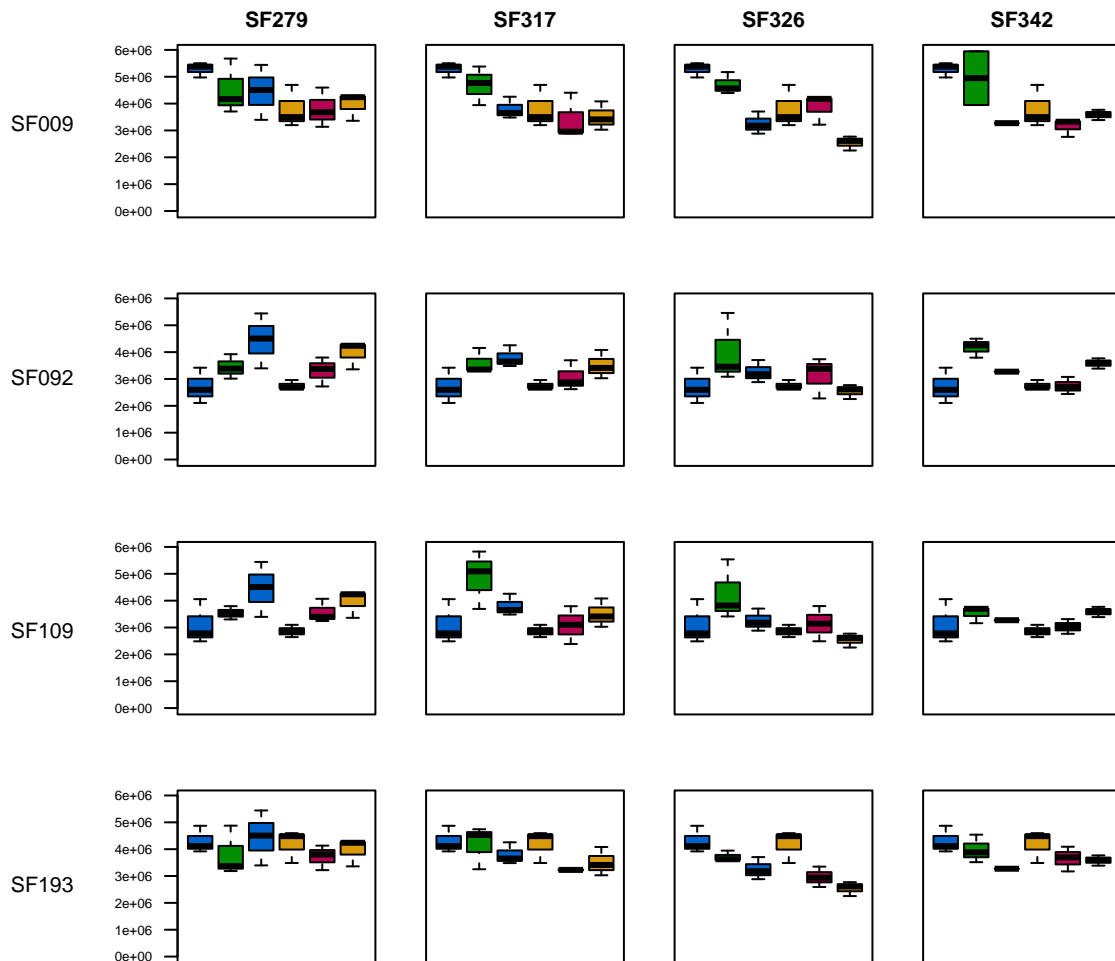

HanXRQChr02g0032821  
Putative dihydrodipicolinate reductase,  
plant-type; Dihydrodipicolinate reductase

Parents WW  
Parents WD  
Hybrids WW  
Hybrids WD

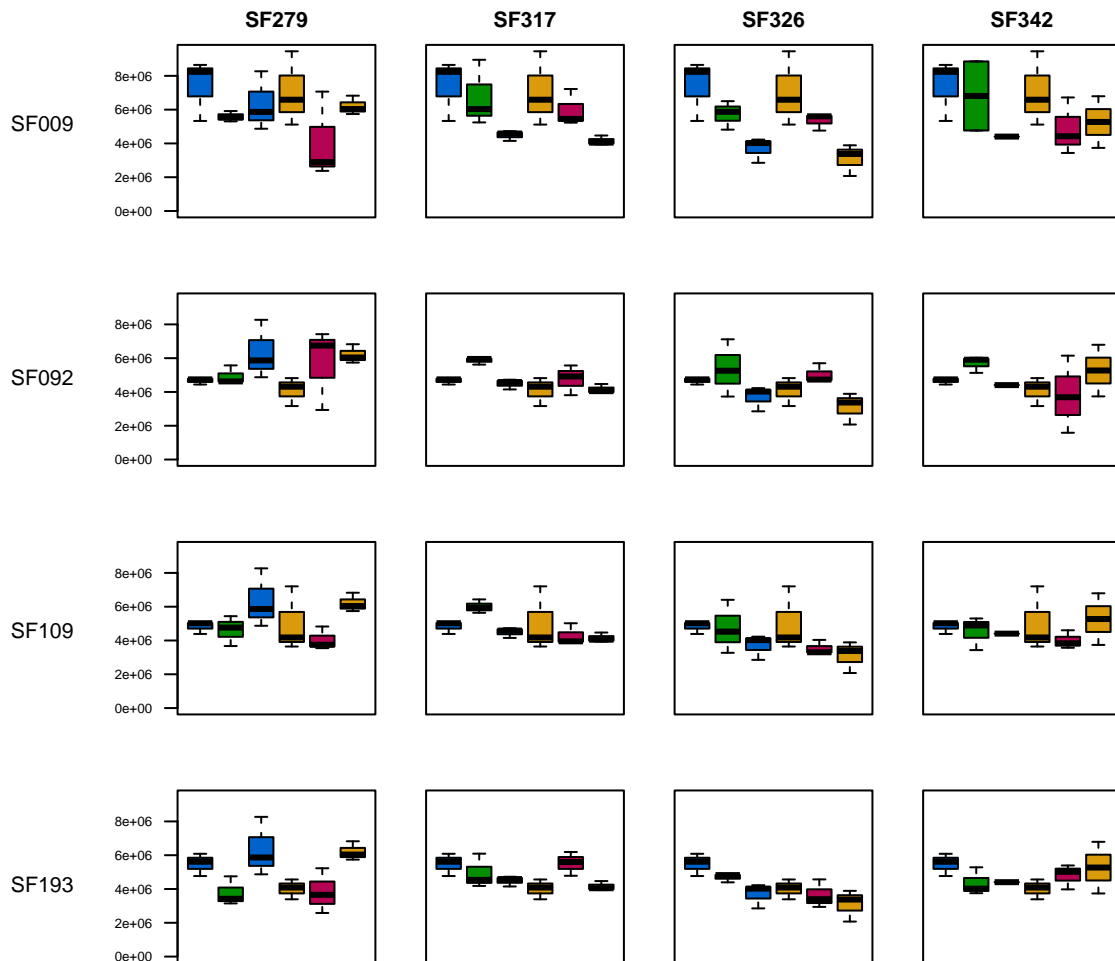

HanXRQChr05g0142961  
 Probable haloacid dehalogenase-like  
 hydrolase (HAD) superfamily protein

Parents WW  
 Parents WD  
 Hybrids WW  
 Hybrids WD

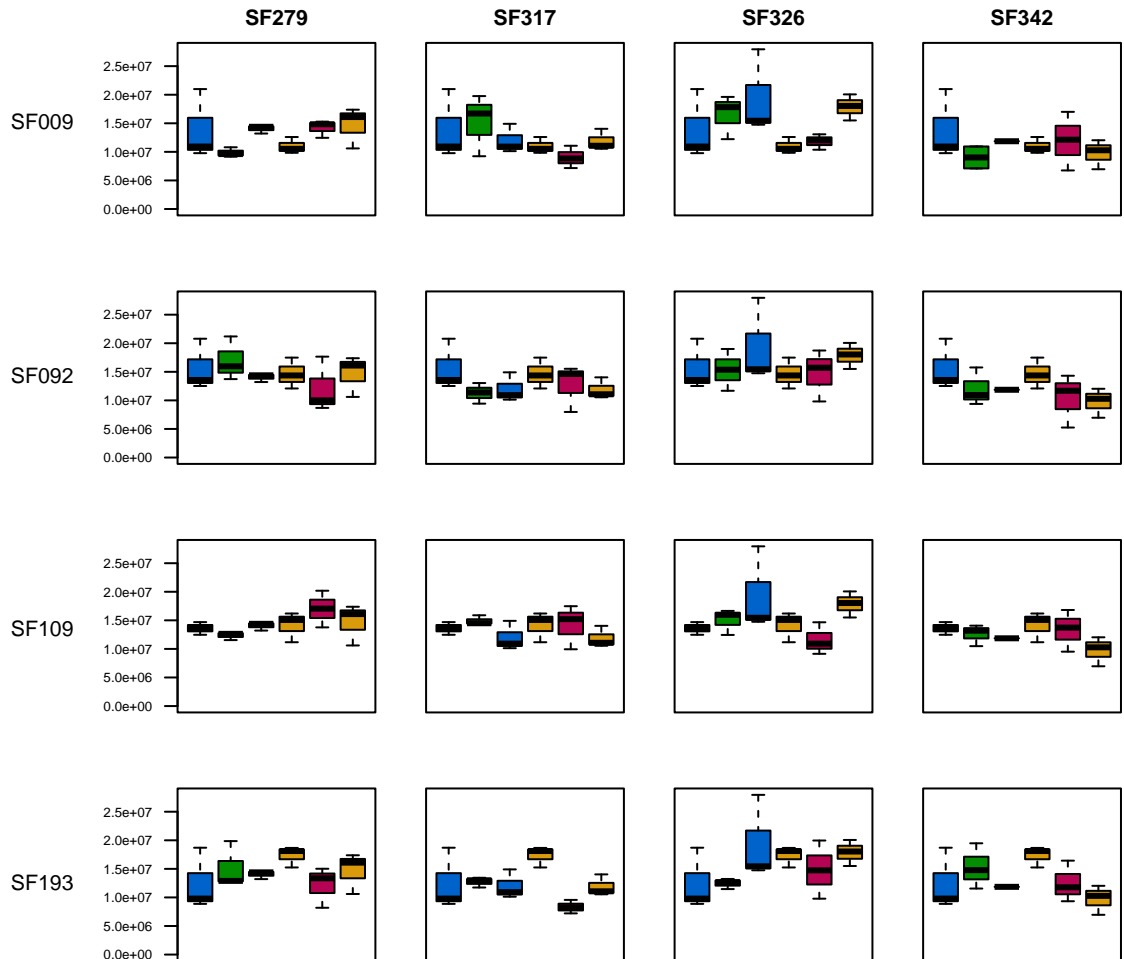

HanXRQChr03g0090181  
Probable oxygen-dependent  
coproporphyrinogen-III oxidase, chloroplas

Parents WW  
Parents WD  
Hybrids WW  
Hybrids WD

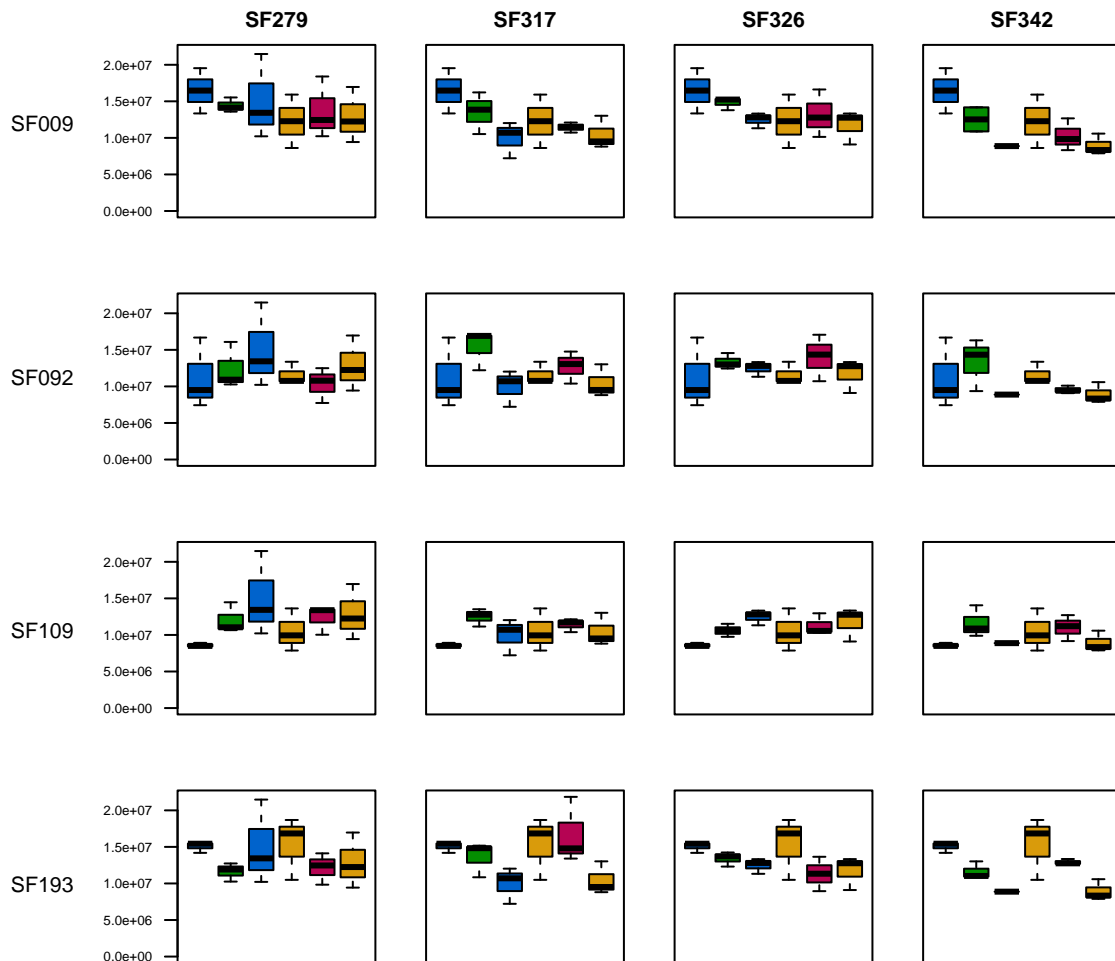

HanXRQChr07g0205991  
Probable calreticulin 3

Parents WW  
Parents WD  
Hybrids WW  
Hybrids WD

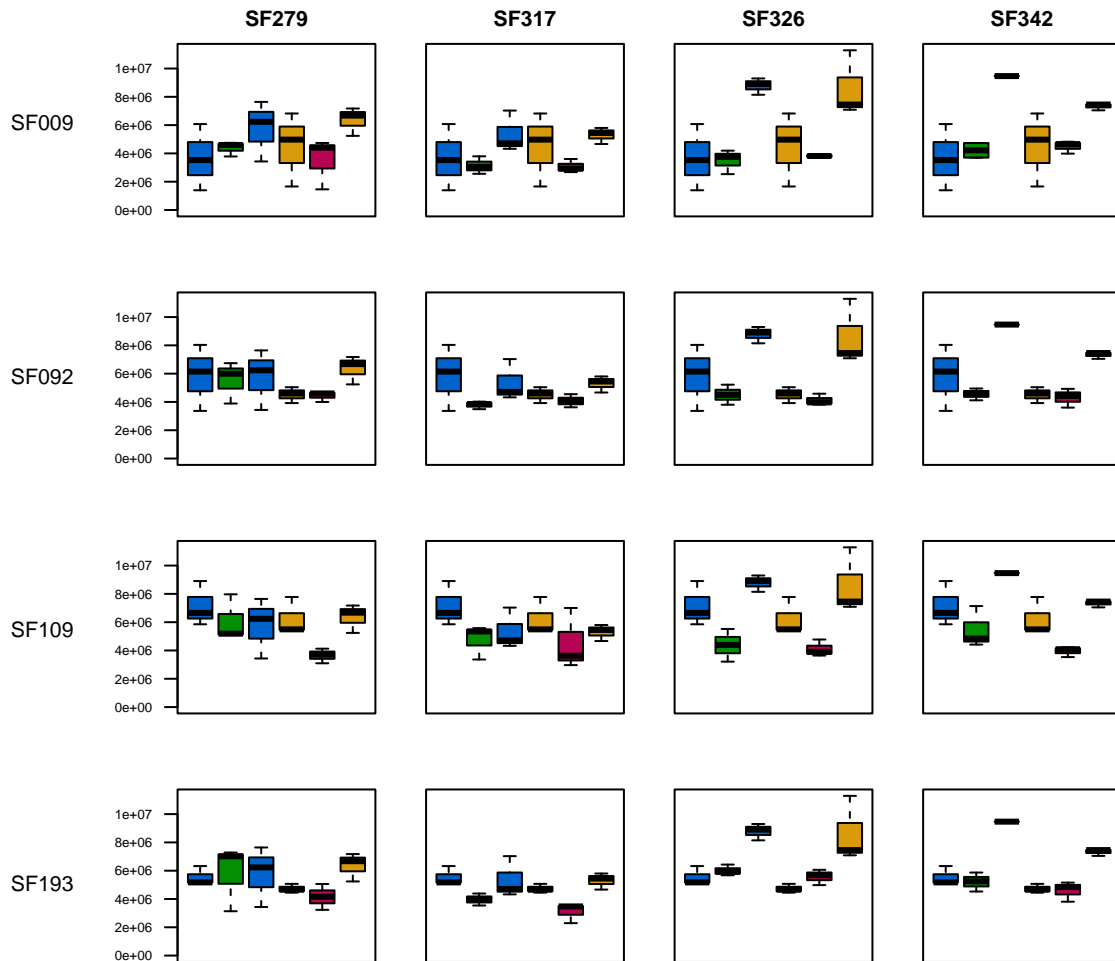

HanXRQChr00c0492g0575091  
Probable ATP synthase subunit alpha,  
chloroplastic

Parents WW  
Parents WD  
Hybrids WW  
Hybrids WD

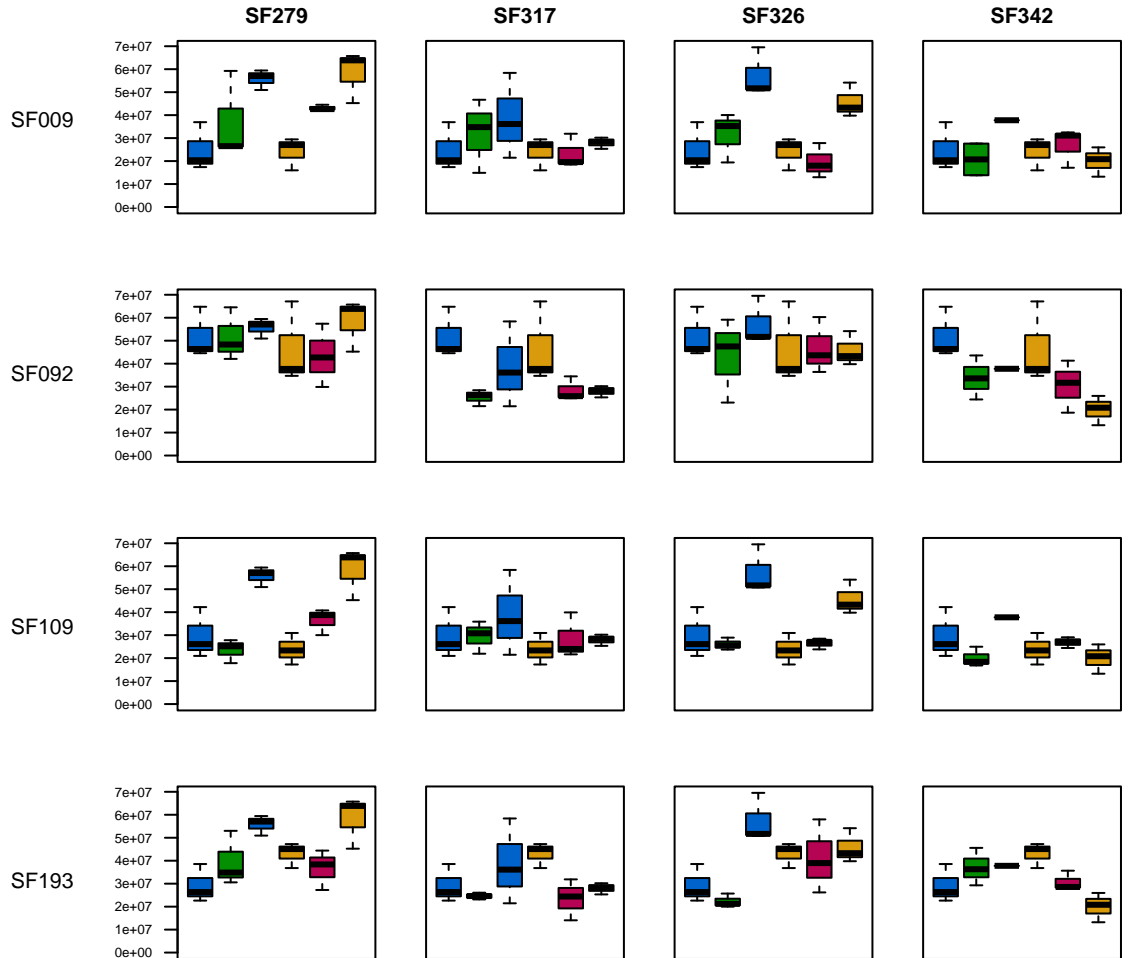

HanXRQChr15g0494701  
Probable thiamine thiazole synthase,  
chloroplastic

Parents WW  
Parents WD  
Hybrids WW  
Hybrids WD

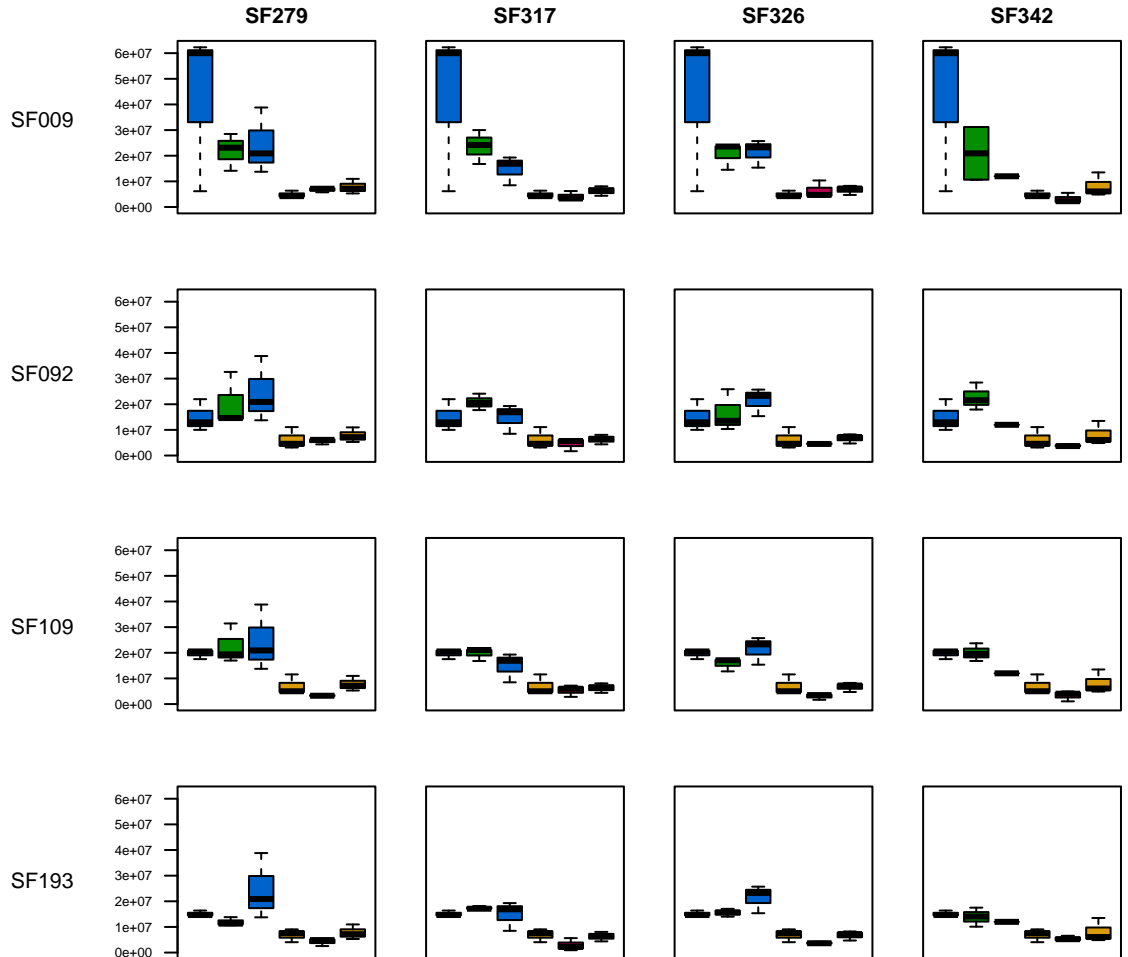

HanXRQChr13g0406021  
Probable leucine-rich repeat (LRR)  
family protein

Parents WW  
Parents WD  
Hybrids WW  
Hybrids WD

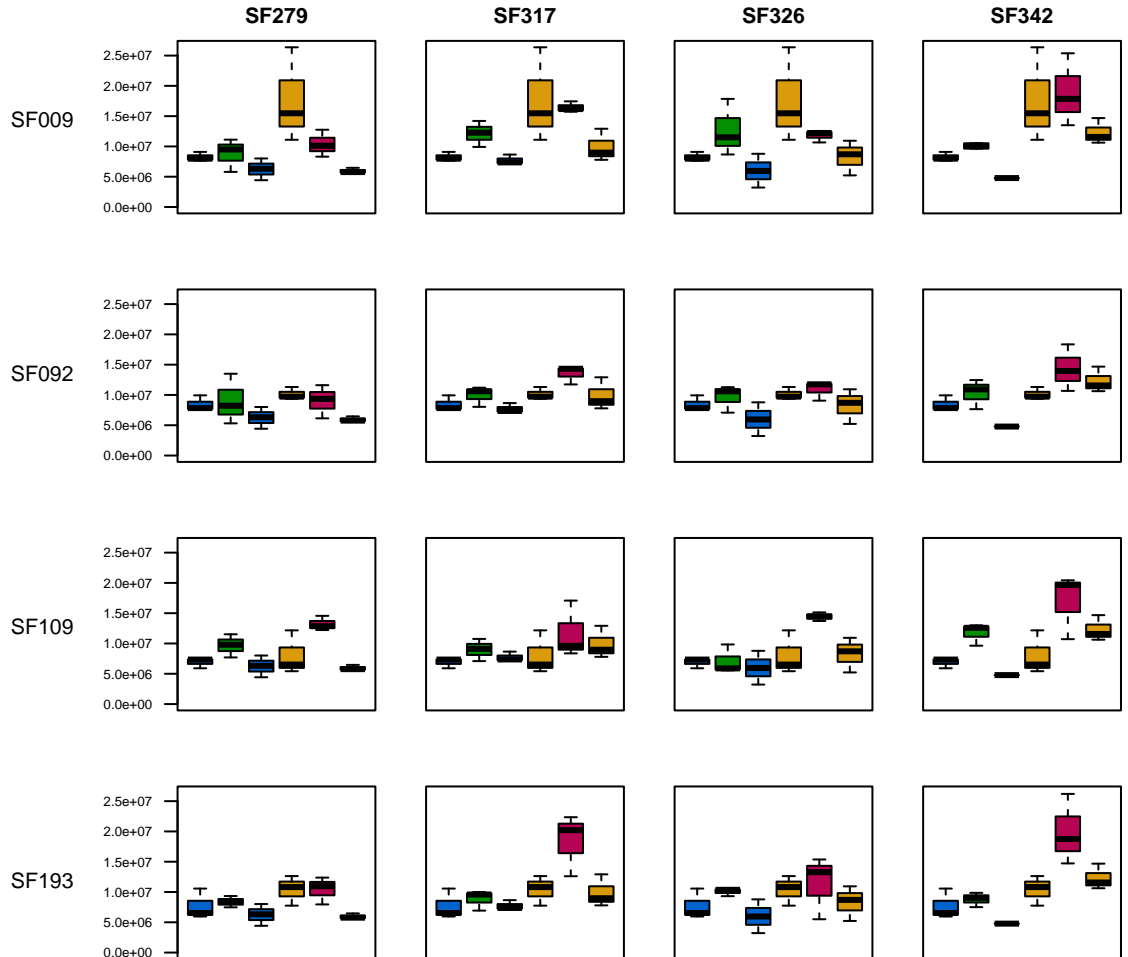



HanXRQChr03g0071611  
Probable ADP glucose pyrophosphorylase  
large subunit 1

Parents WW  
Parents WD  
Hybrids WW  
Hybrids WD

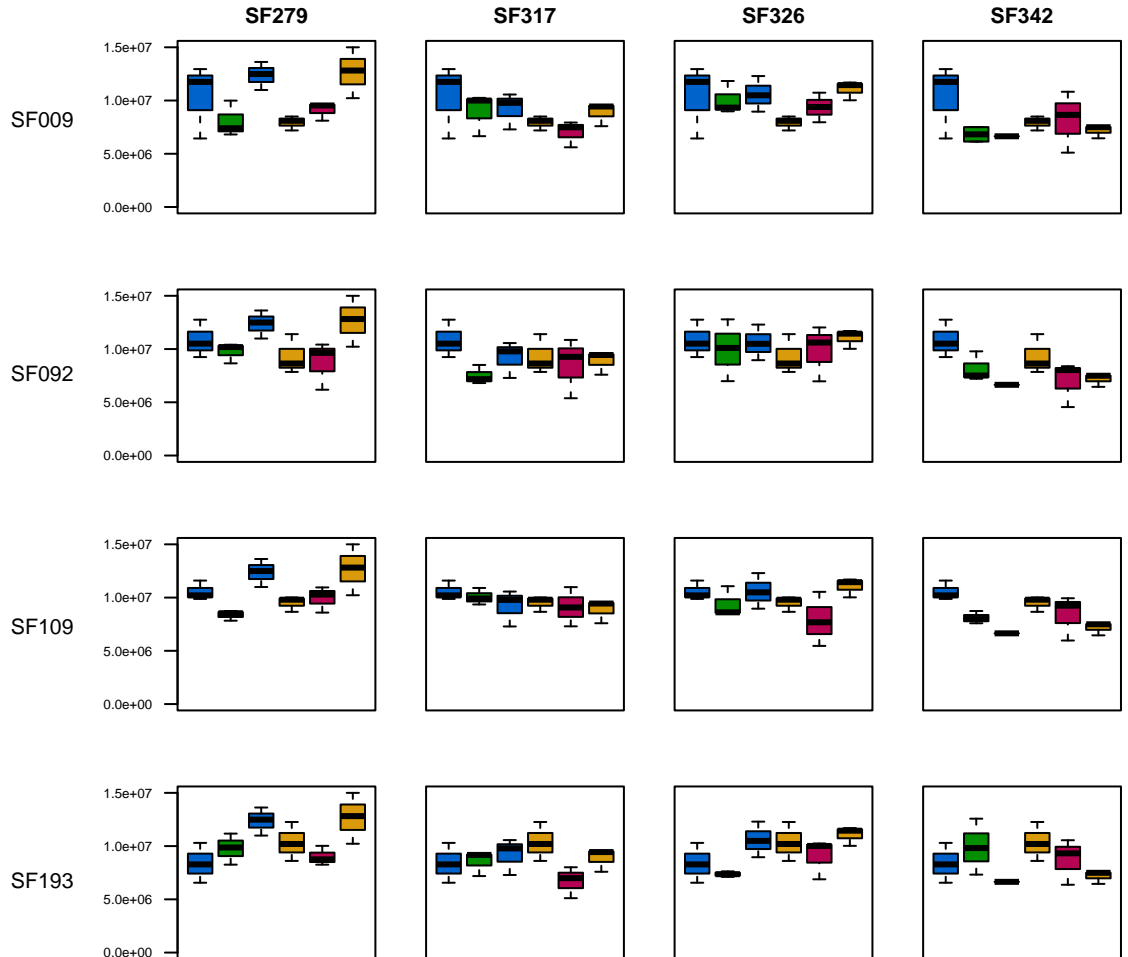

HanXRQChr16g0521521  
Putative HAD hydrolase, subfamily 1A;  
HAD-like domain

Parents WW  
Parents WD  
Hybrids WW  
Hybrids WD

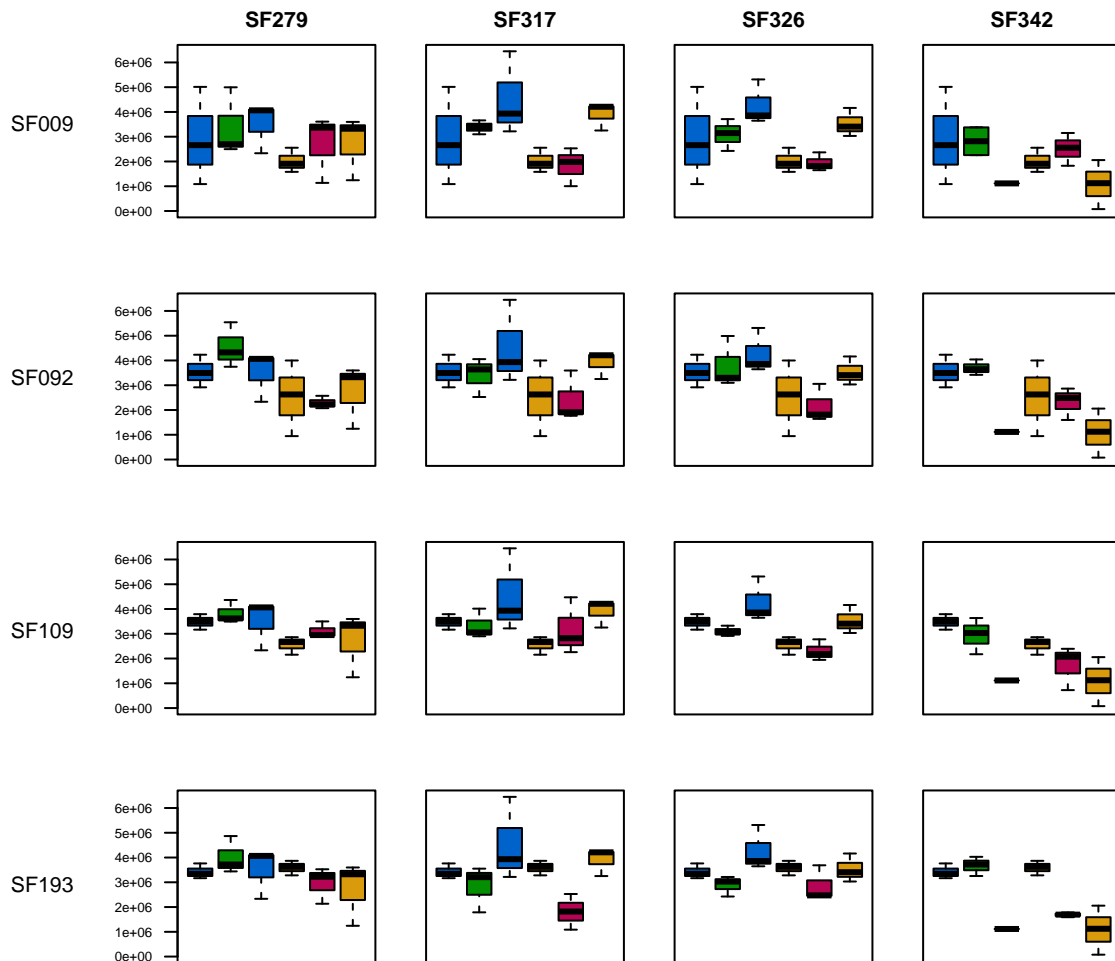

HanXRQChr09g0251621  
 Probable carbamoyl phosphate synthetase  
 B

Parents WW  
 Parents WD  
 Hybrids WW  
 Hybrids WD

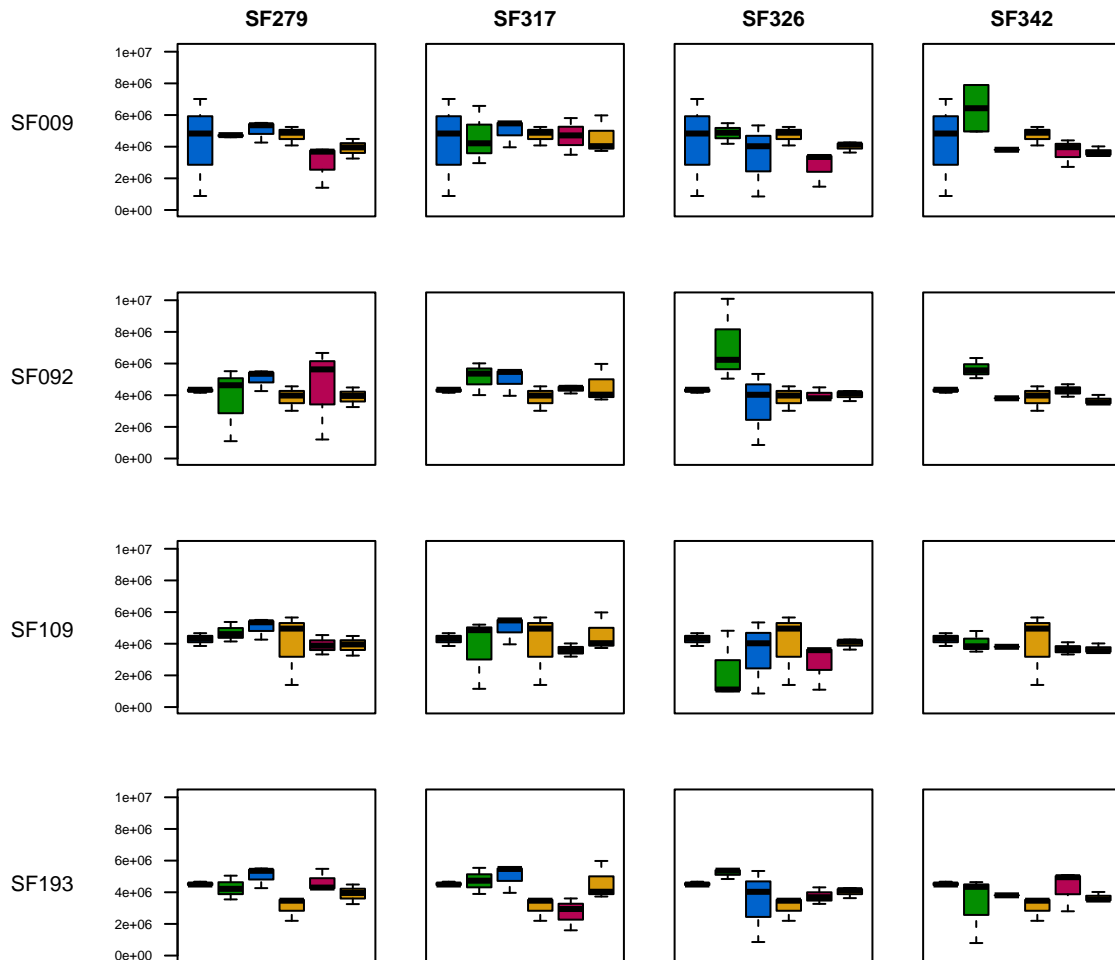

HanXRQChr07g0196791  
Probable formate--tetrahydrofolate  
ligase

Parents WW  
Parents WD  
Hybrids WW  
Hybrids WD

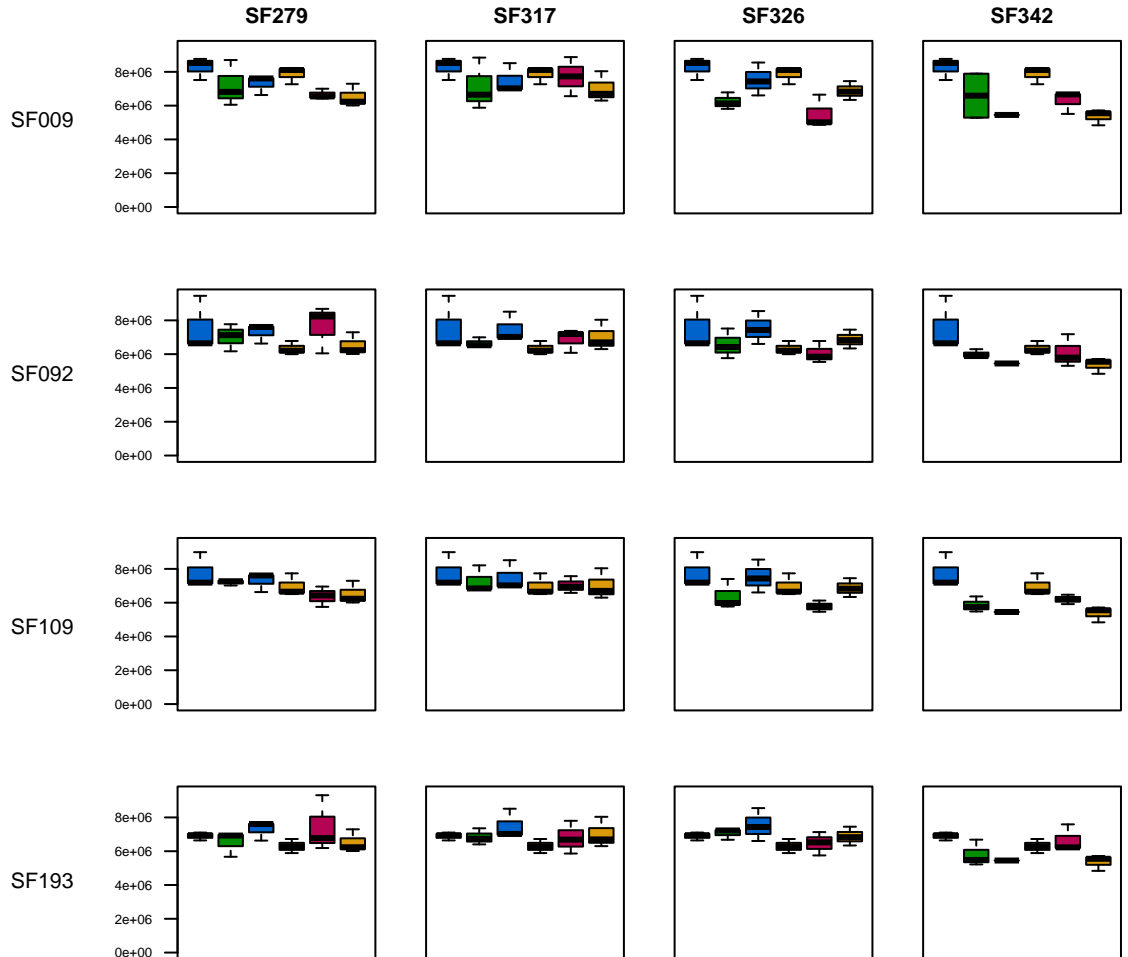

HanXRQChr09g0249671  
Putative vacuolar (H<sup>+</sup>)-ATPase G subunit

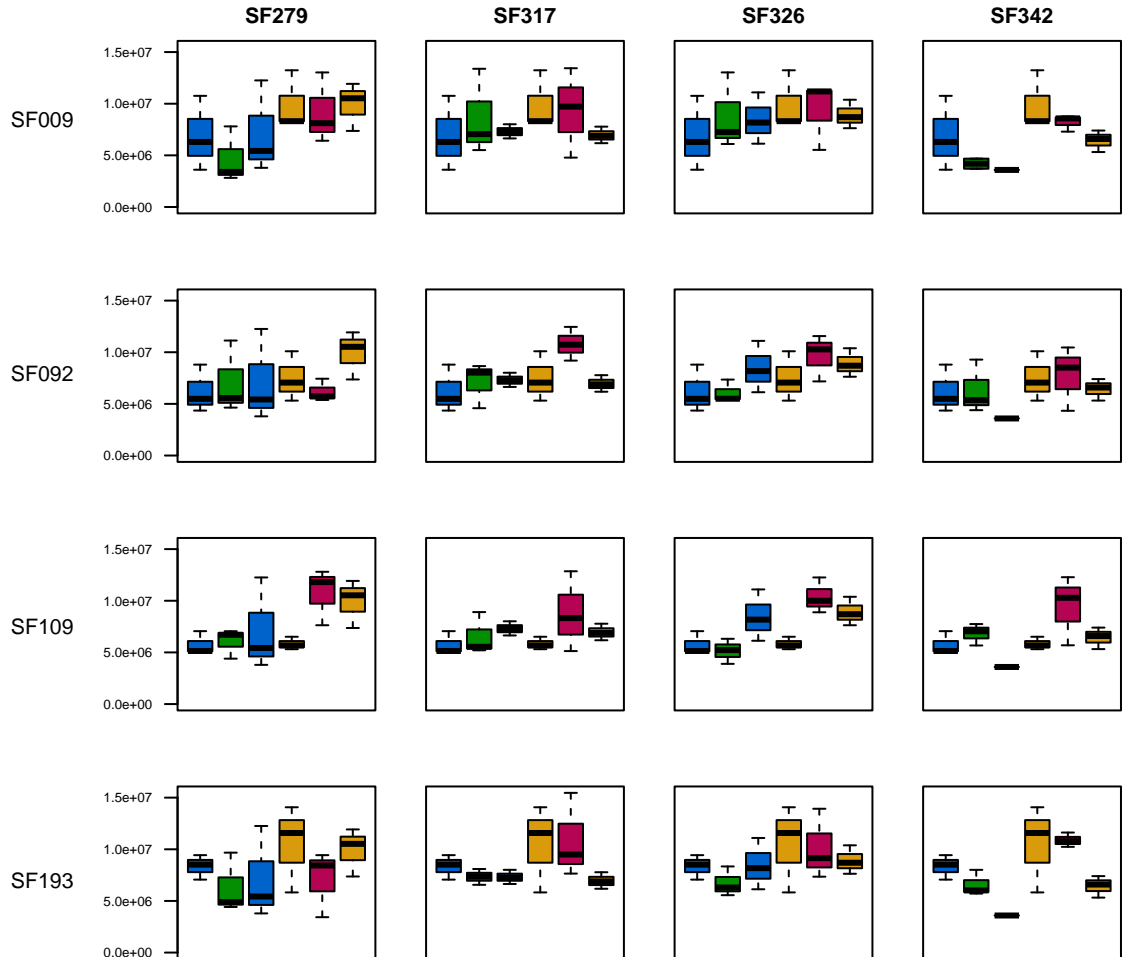

HanXRQChr16g0513351  
Probable DEAD box RNA helicase (RH3)

- Parents WW
- Parents WD
- Hybrids WW
- Hybrids WD

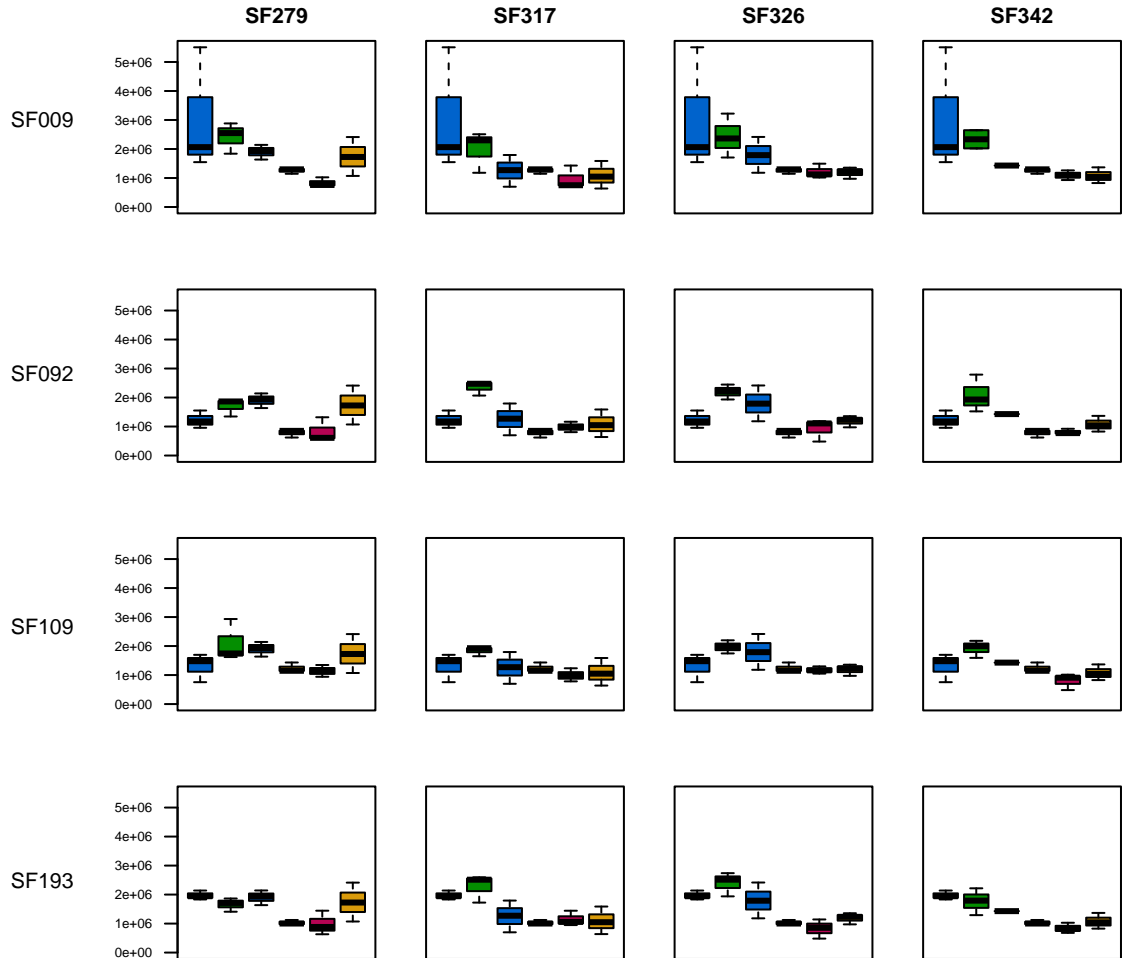

HanXRQChr02g0047721  
Probable copper chaperone for SOD1

Parents WW  
Parents WD  
Hybrids WW  
Hybrids WD

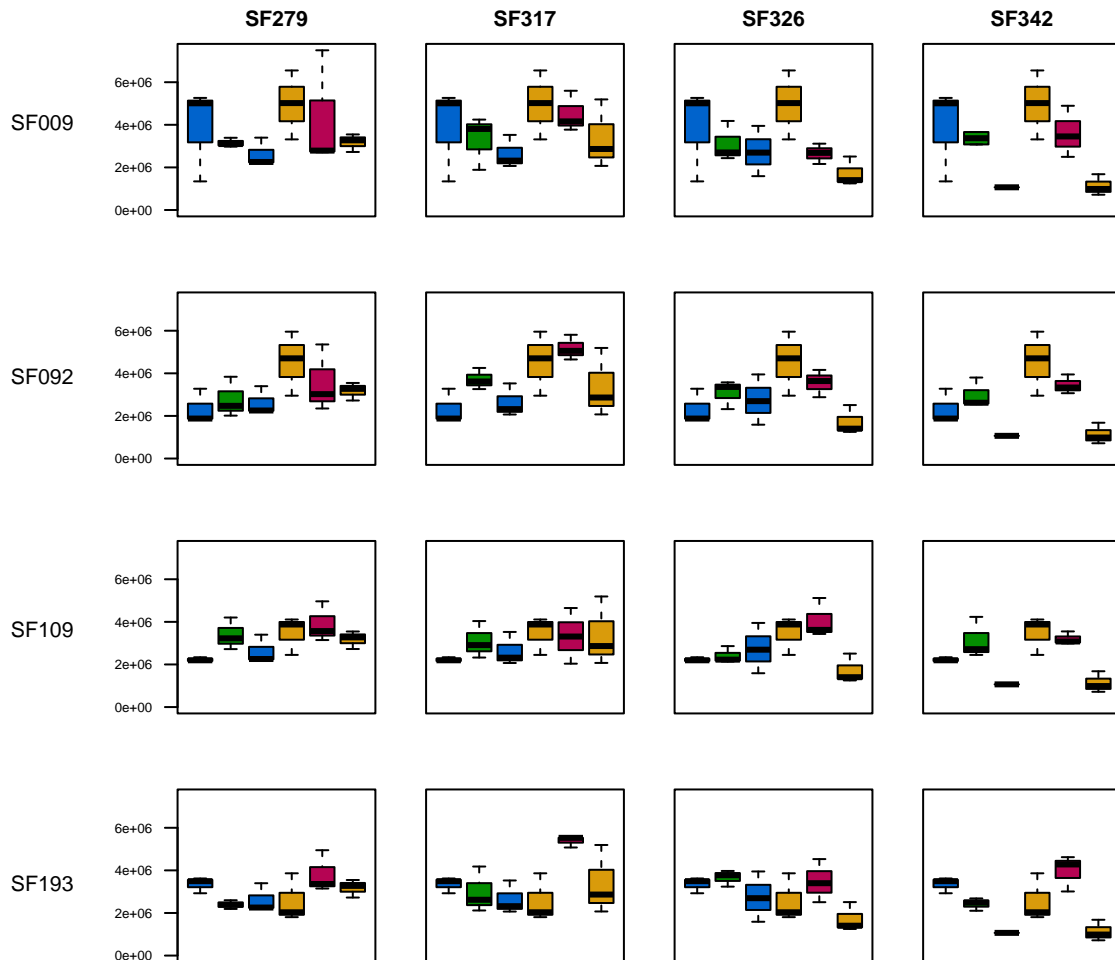

HanXRQChr07g0190131  
Putative superoxide dismutase,  
copper/zinc binding domain; Superoxide dis

Parents WW  
Parents WD  
Hybrids WW  
Hybrids WD

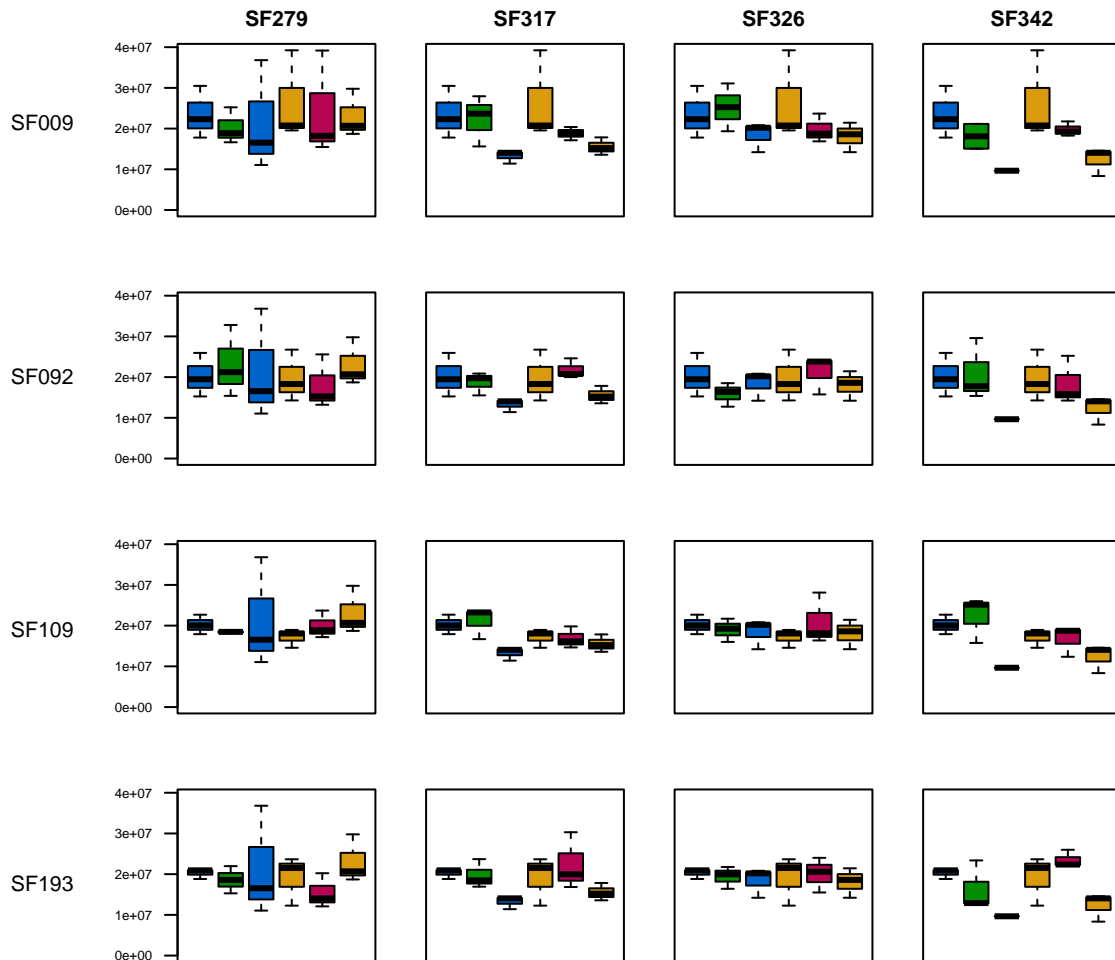



HanXRQChr10g0318431  
Probable  
3-oxoacyl-[acyl-carrier-protein] reductase

Parents WW  
Parents WD  
Hybrids WW  
Hybrids WD

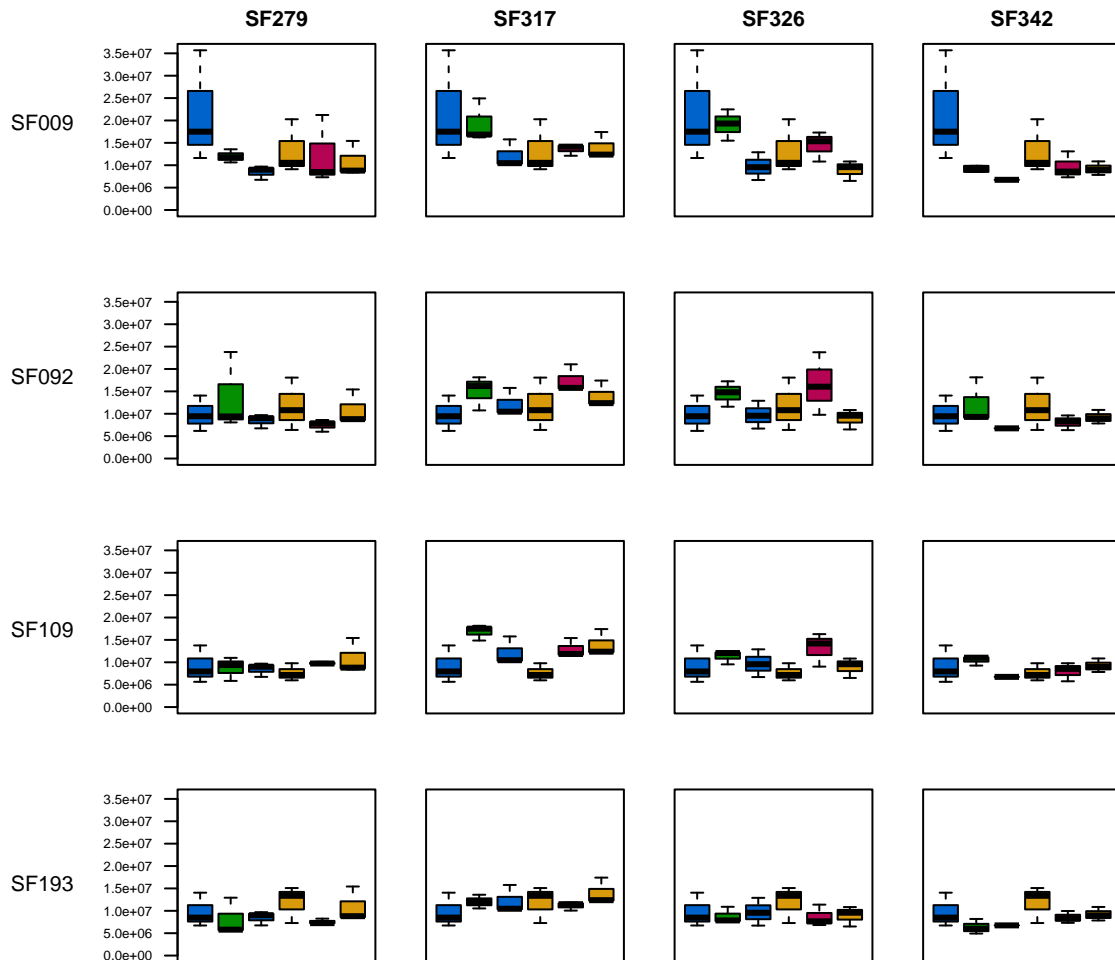

HanXRQChr08g0229301  
Probable arginosuccinate synthase family

Parents WW  
Parents WD  
Hybrids WW  
Hybrids WD

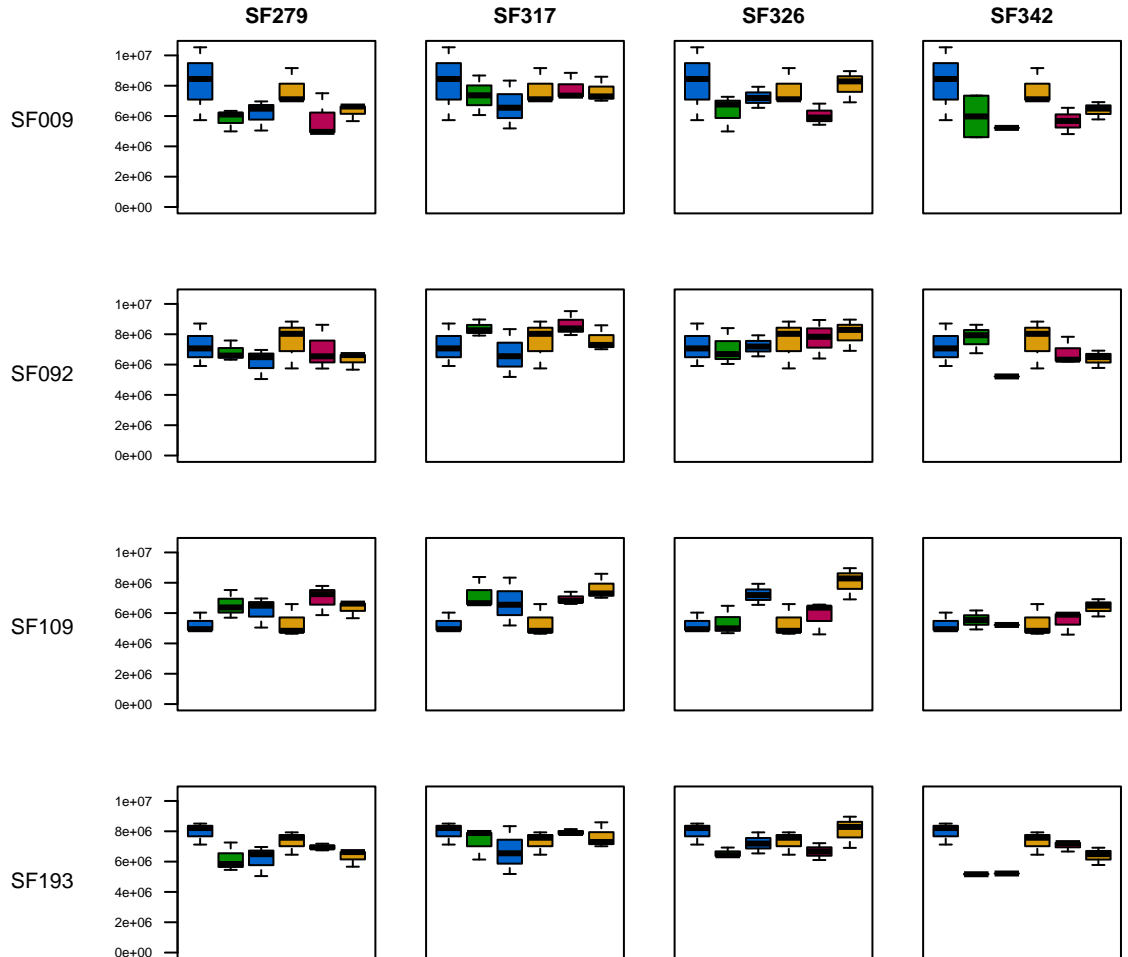

HanXRQChr02g0058751  
Probable glycine-rich RNA-binding  
protein 2

Parents WW  
Parents WD  
Hybrids WW  
Hybrids WD

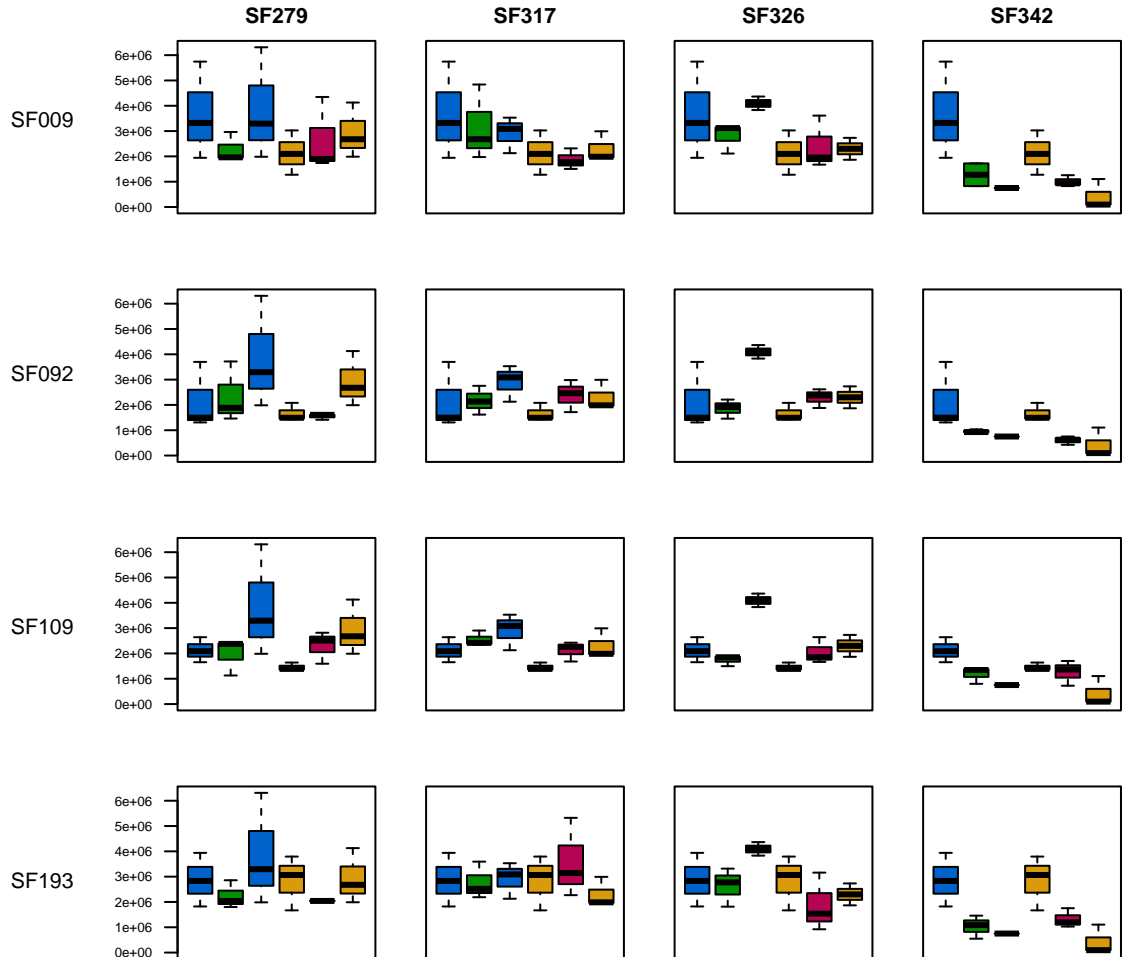

HanXRQChr10g0316521  
Putative protein kinase-like domain;  
Leucine-rich repeat-containing N-terminal

Parents WW  
Parents WD  
Hybrids WW  
Hybrids WD

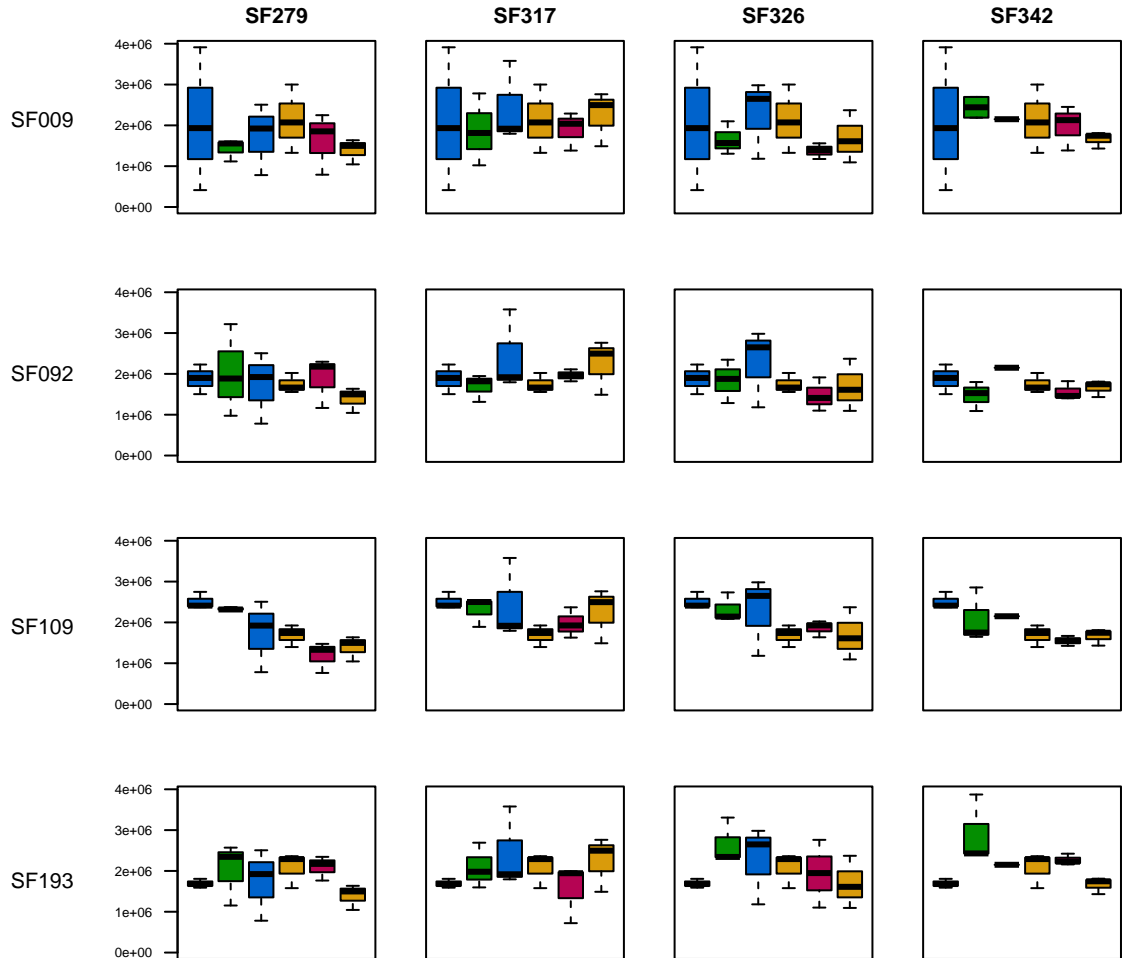

HanXRQChr17g0535811  
 Probable mitochondrial substrate  
 carrier family protein

Parents WW  
 Parents WD  
 Hybrids WW  
 Hybrids WD

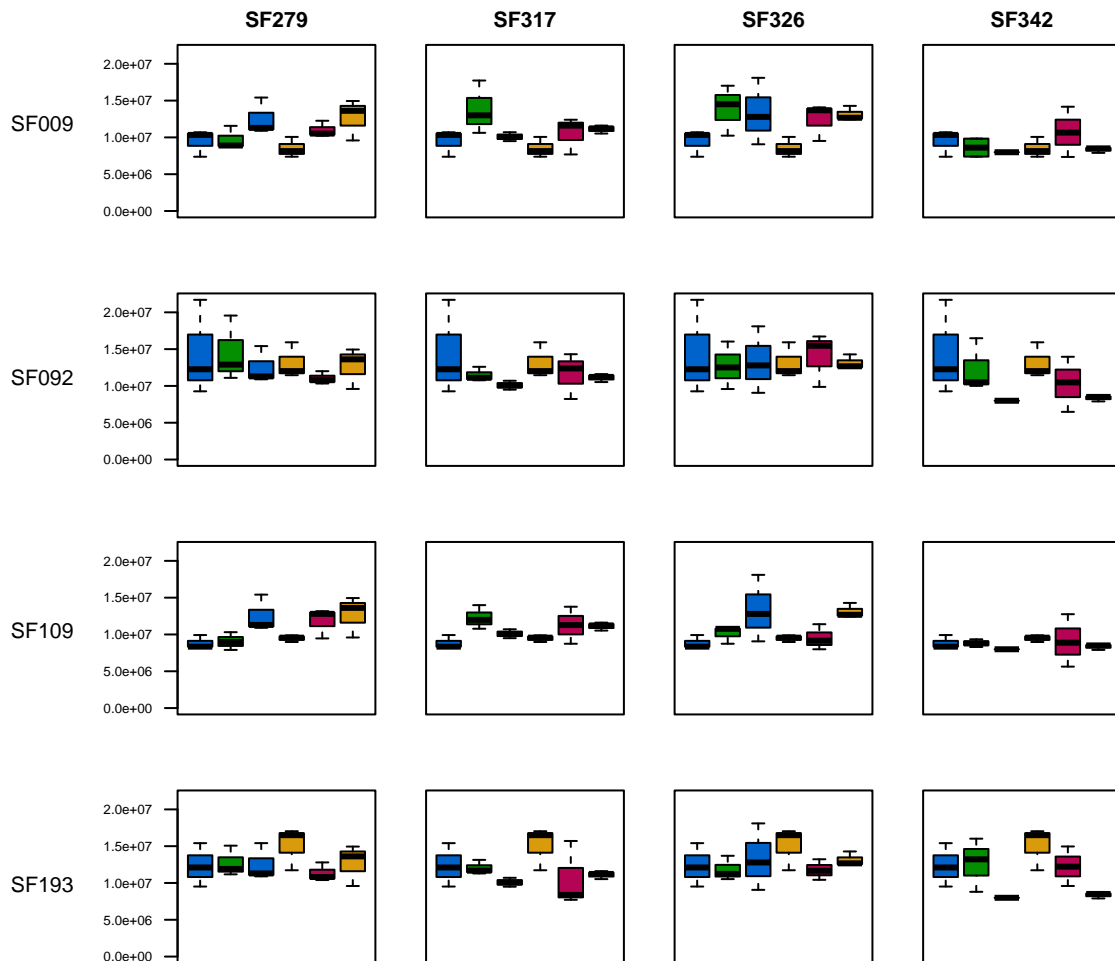

HanXRQChr01g0023771  
Probable 2-alkenal reductase  
(NADP(+)-dependent) EC=1.1.1.54

Parents WW  
Parents WD  
Hybrids WW  
Hybrids WD

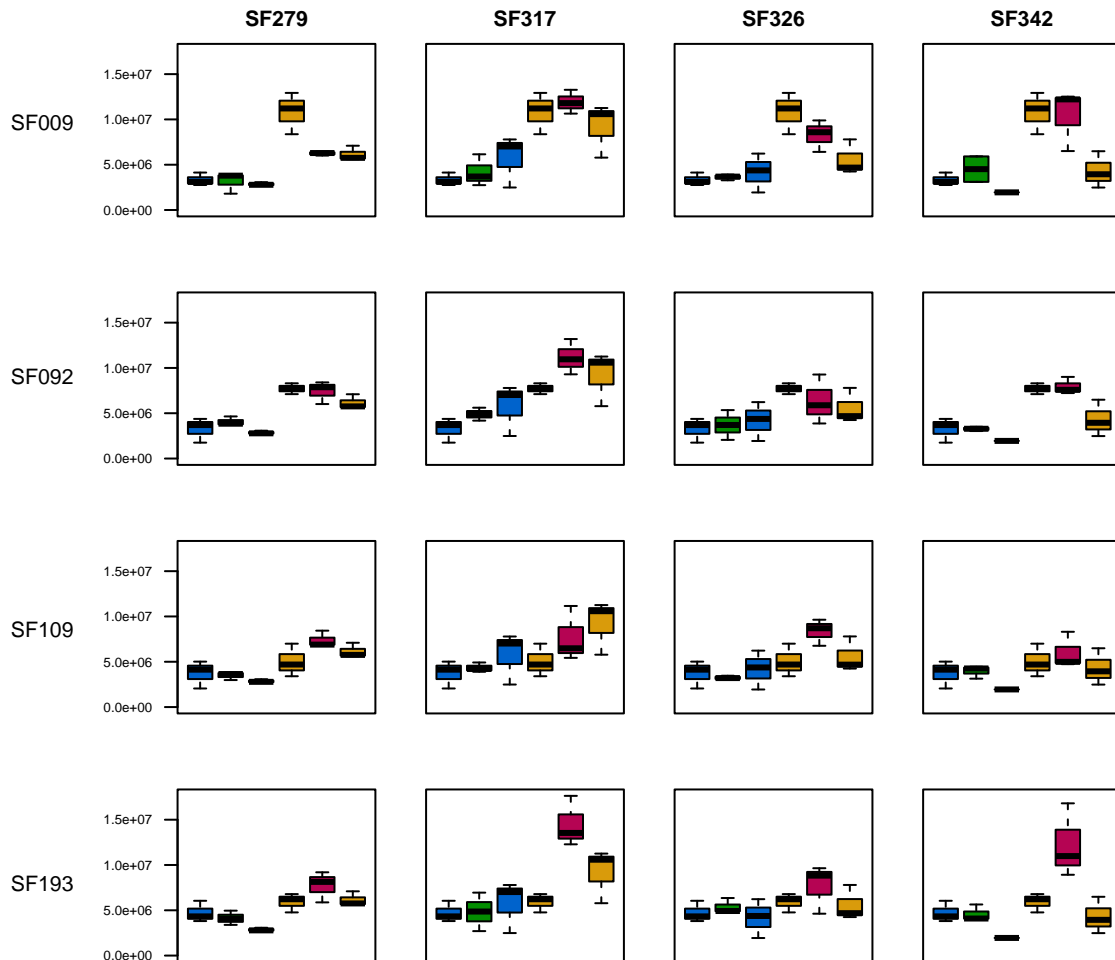

HanXRQChr17g0544201  
Probable hydroxypyruvate reductase

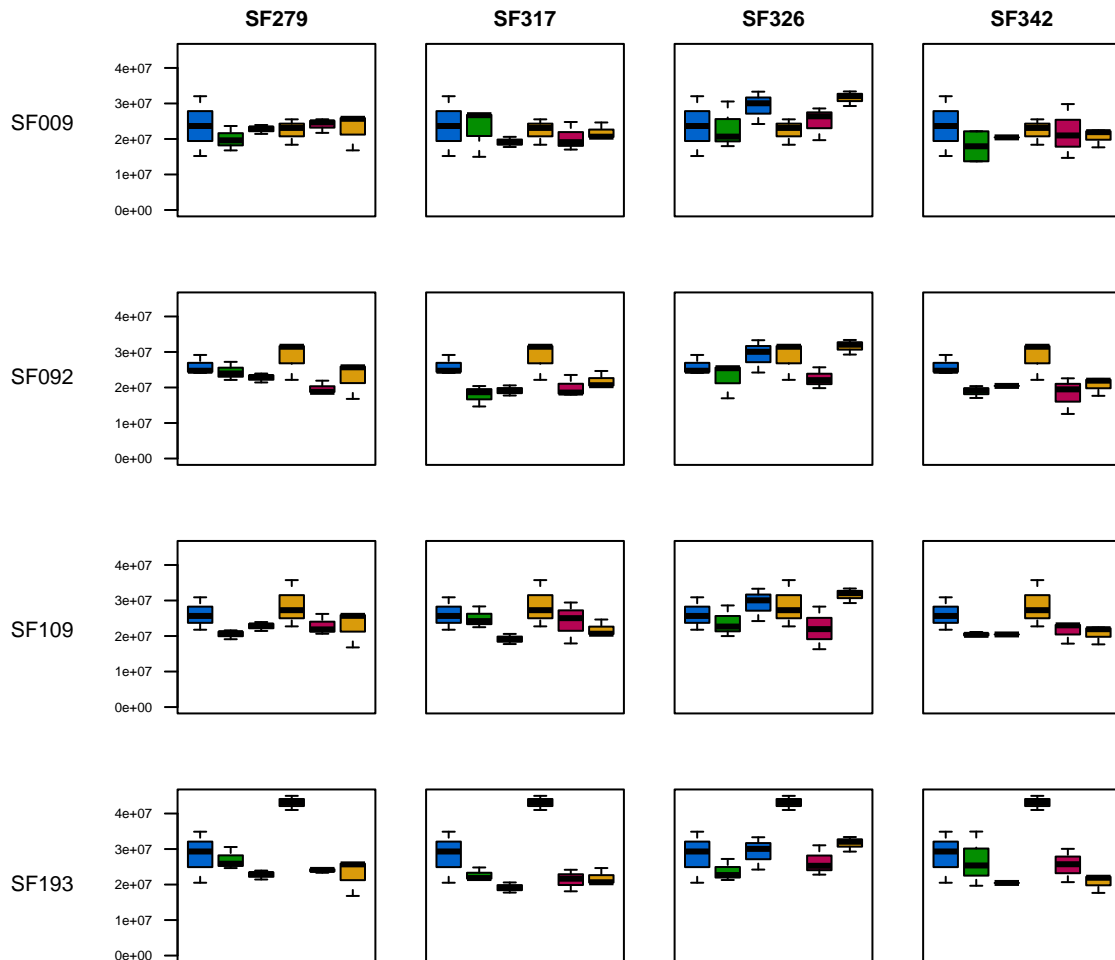

HanXRQChr12g0357871  
Probable tetratricopeptide repeat  
(TPR)-like superfamily protein

Parents WW  
Parents WD  
Hybrids WW  
Hybrids WD

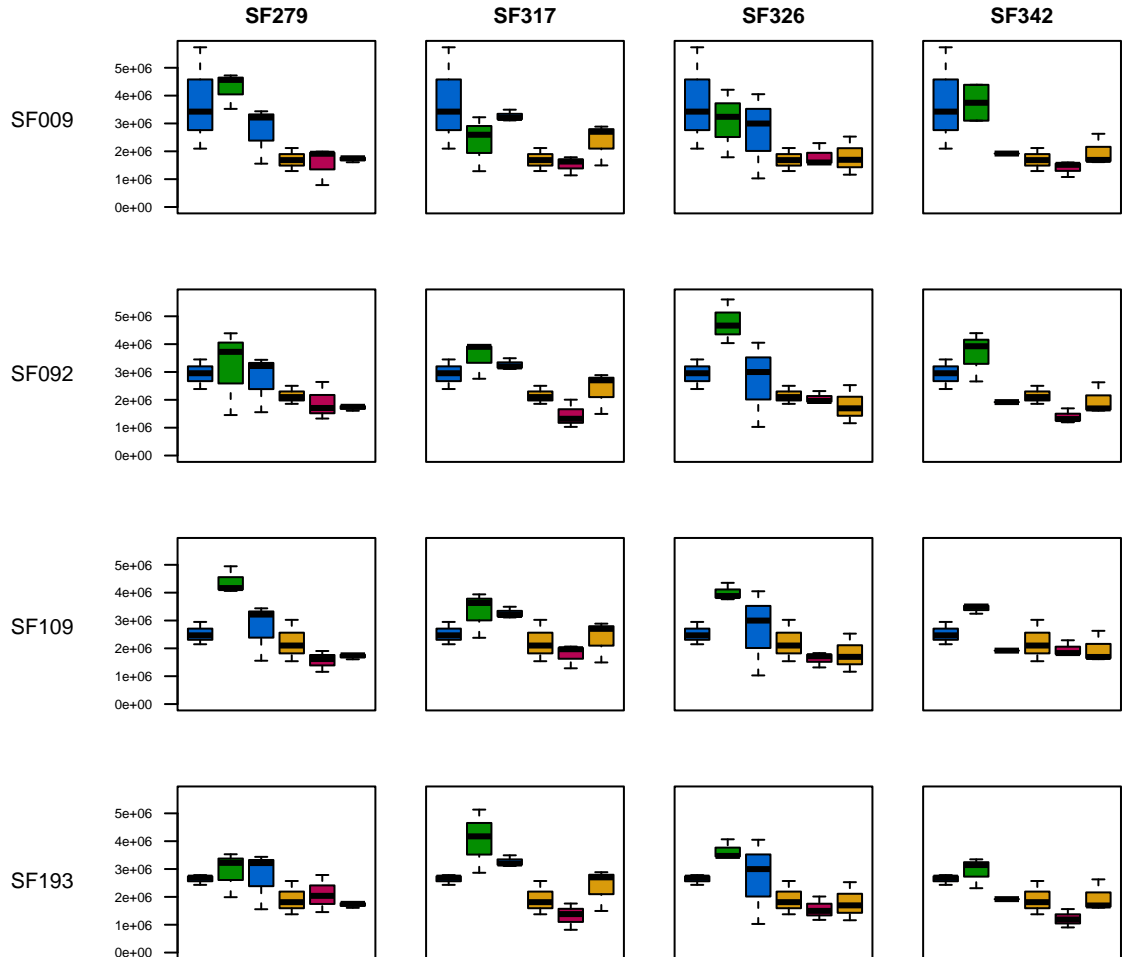



HanXRQChr14g0444401  
 Putative alcohol dehydrogenase  
 superfamily, zinc-type; NAD(P)-binding do

■ Parents WW  
 ■ Parents WD  
 ■ Hybrids WW  
 ■ Hybrids WD

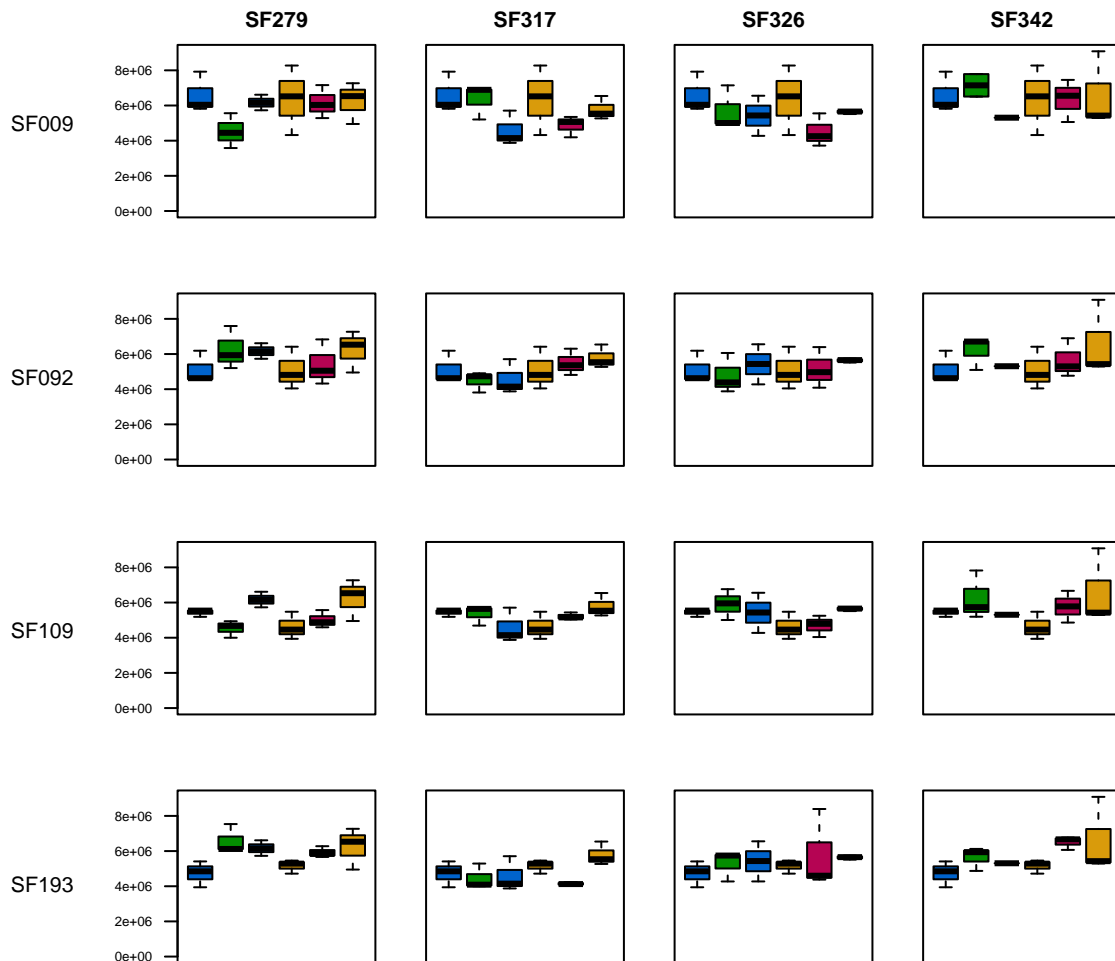

HanXRQChr14g0427911  
Probable plastid movement impaired1

Parents WW  
Parents WD  
Hybrids WW  
Hybrids WD

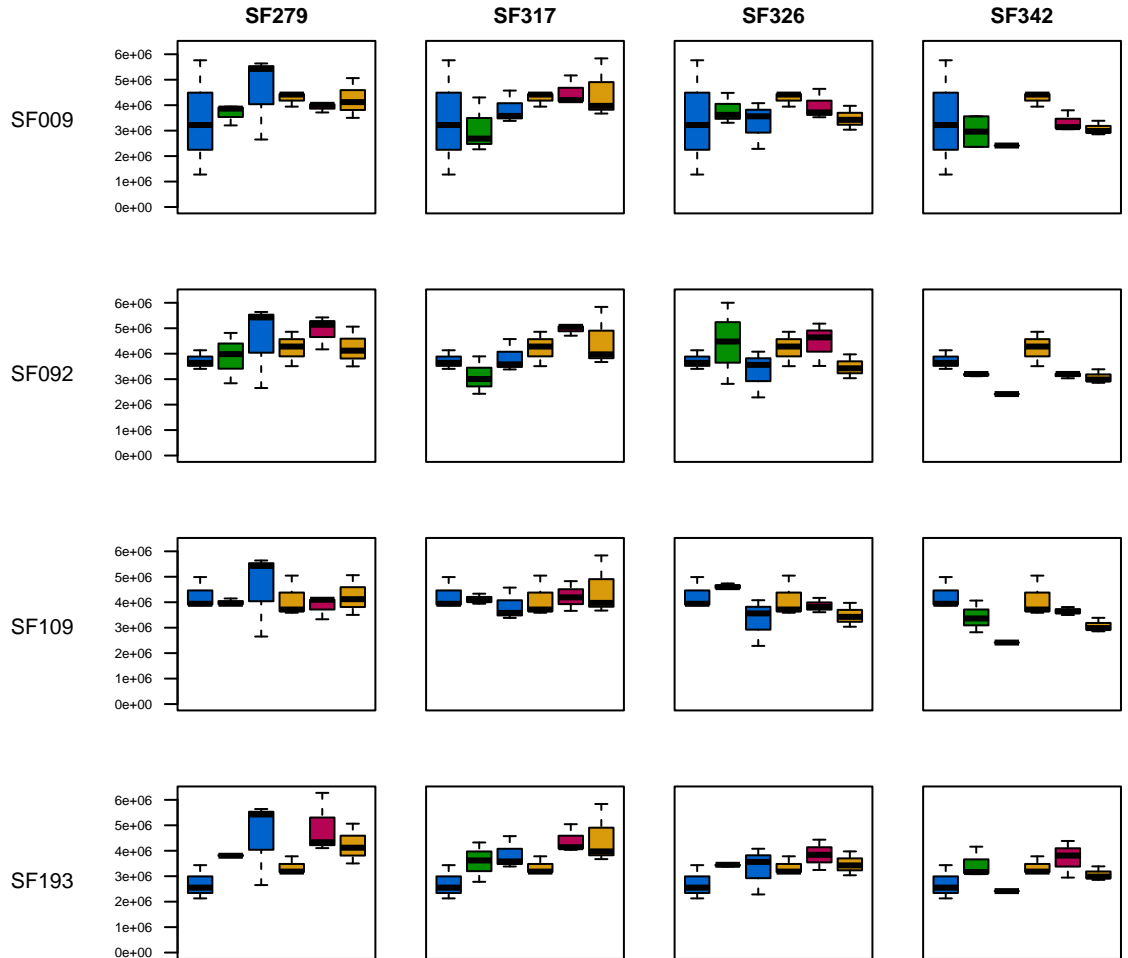

HanXRQChr01g0016231  
Probable ATP synthase subunit O,  
mitochondrial

Parents WW  
Parents WD  
Hybrids WW  
Hybrids WD

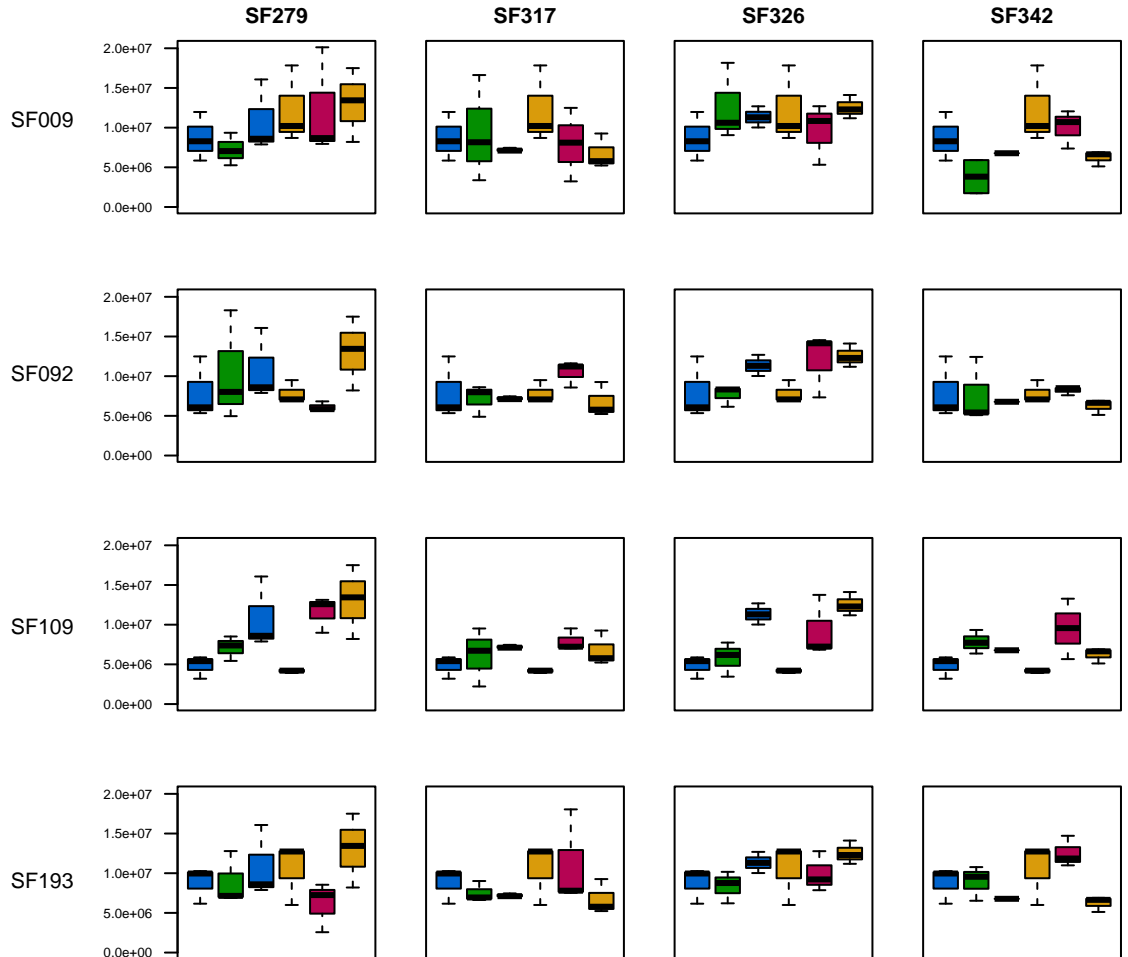

HanXRQChr12g0377731  
Probable ATP synthase subunit beta,  
mitochondrial

Parents WW  
Parents WD  
Hybrids WW  
Hybrids WD

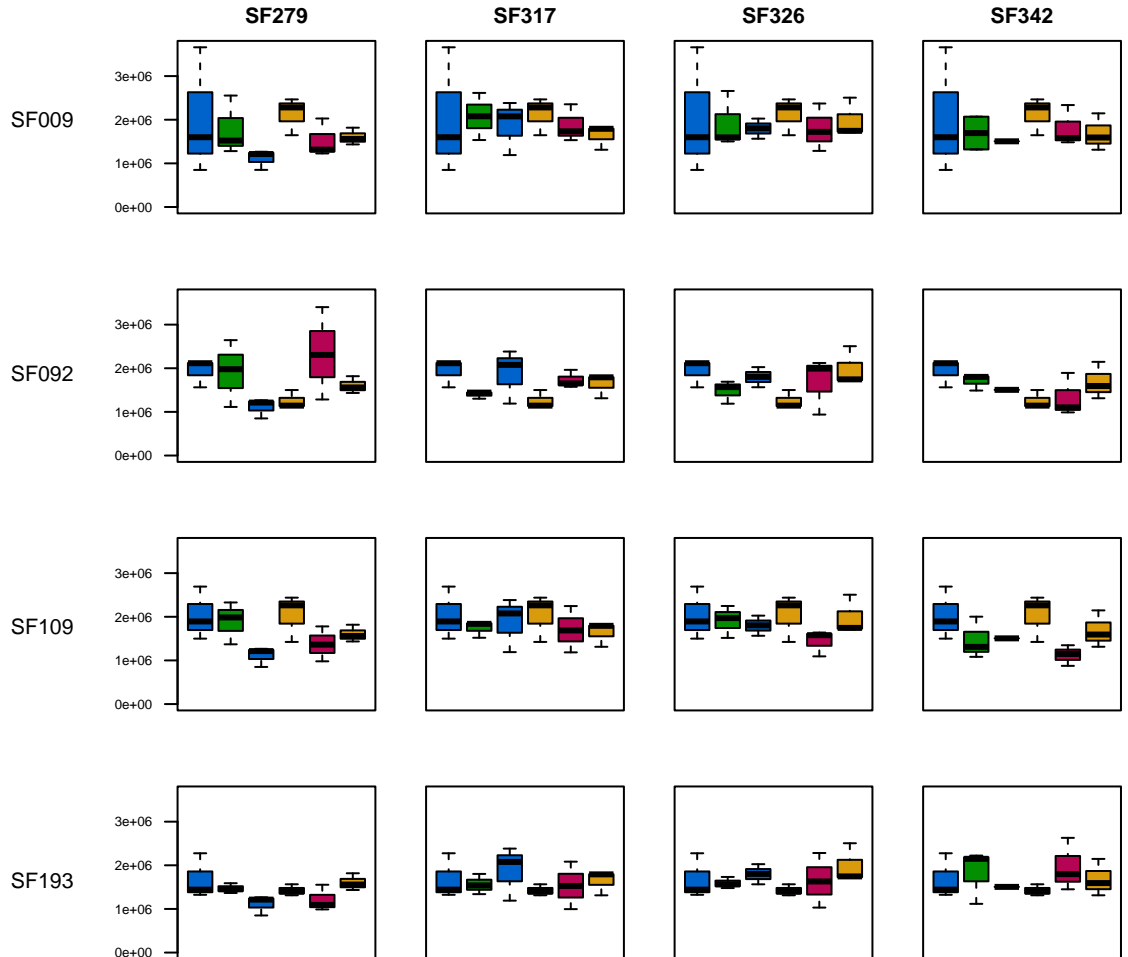

HanXRQChr11g0345451  
Probable plastid-lipid associated  
protein PAP / fibrillin family protein

Parents WW  
Parents WD  
Hybrids WW  
Hybrids WD

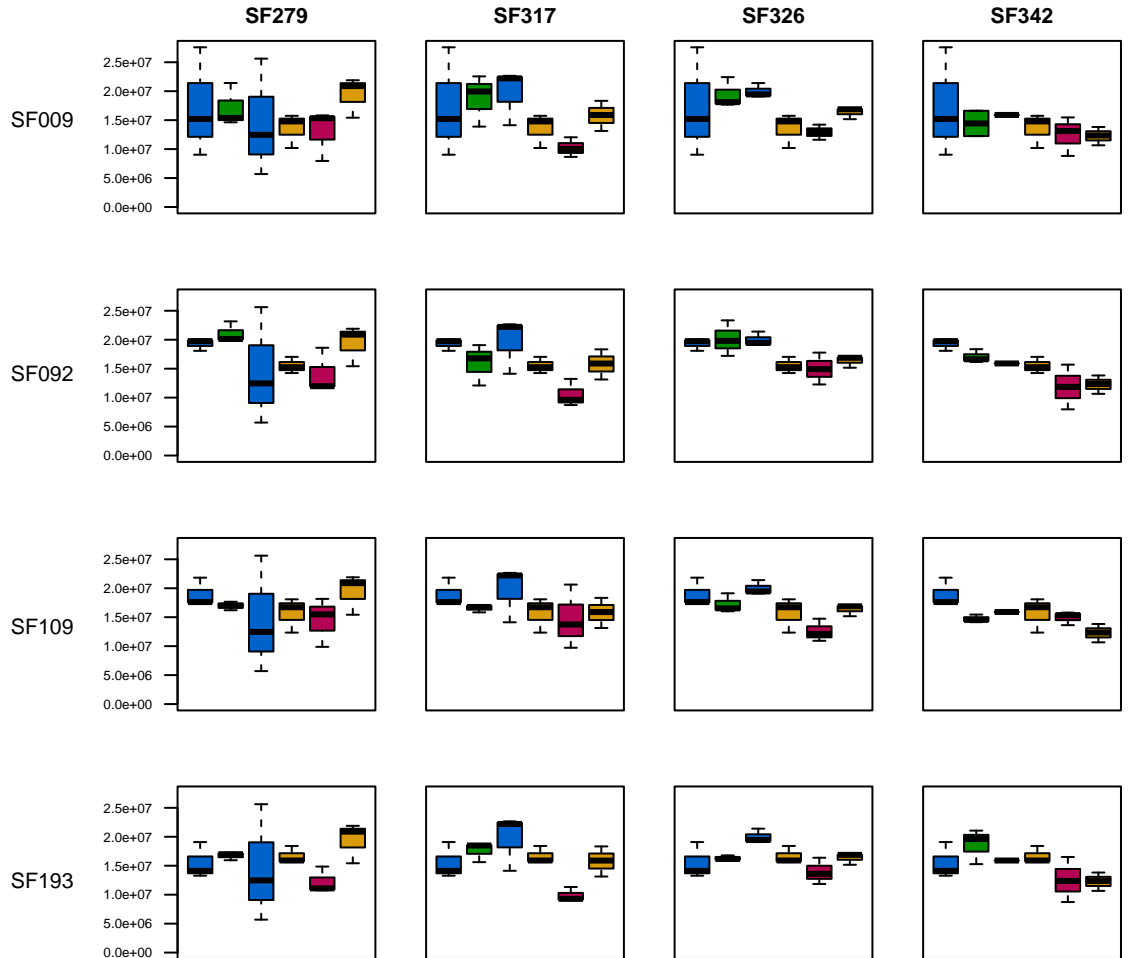

HanXRQChr10g0306001  
Putative nucleotide-binding alpha-beta  
plait domain

Parents WW  
Parents WD  
Hybrids WW  
Hybrids WD

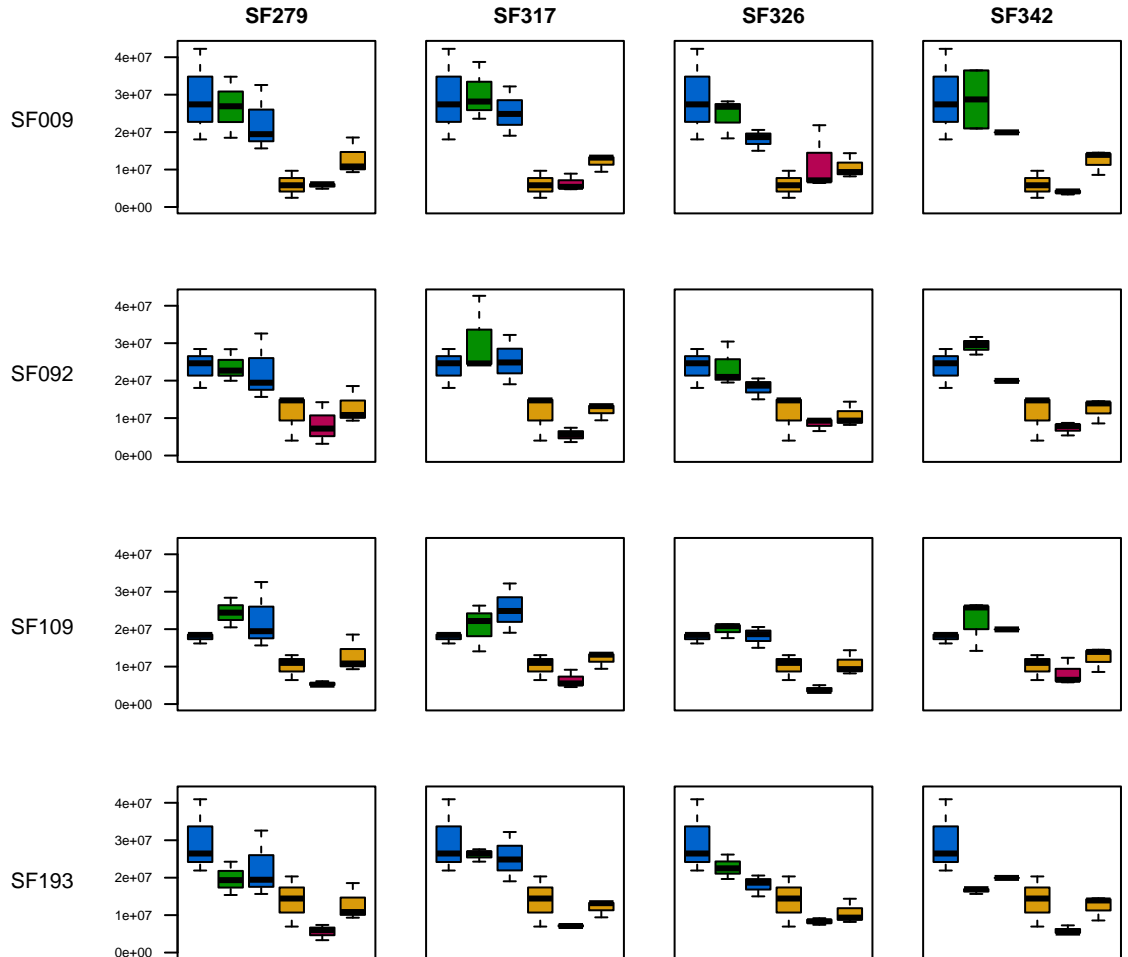

HanXRQChr03g0087741  
 Probable class II aminoacyl-tRNA and  
 biotin synthetases superfamily protein

Parents WW  
 Parents WD  
 Hybrids WW  
 Hybrids WD

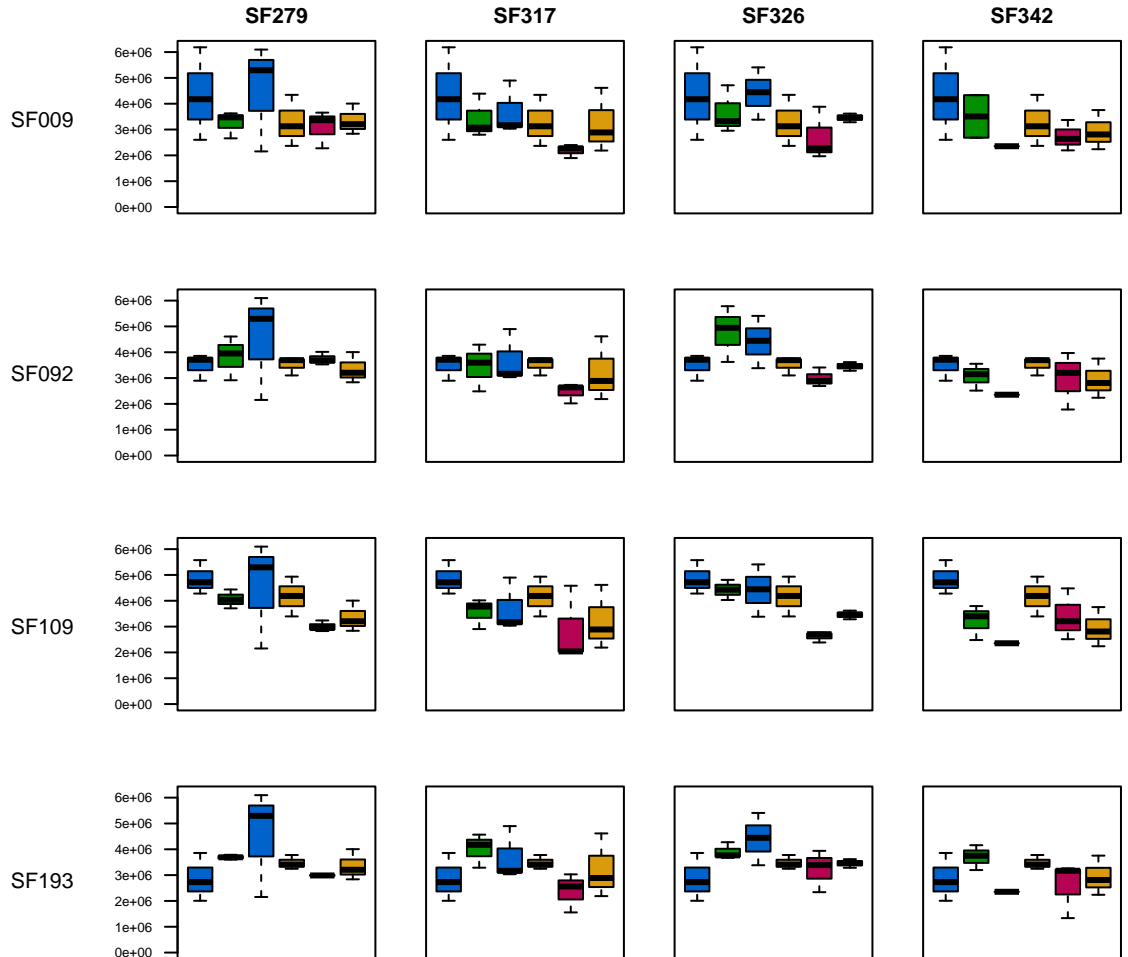

HanXRQChr01g0003071  
 Probable NAD(P)-binding Rossmann-fold  
 superfamily protein

Parents WW  
 Parents WD  
 Hybrids WW  
 Hybrids WD

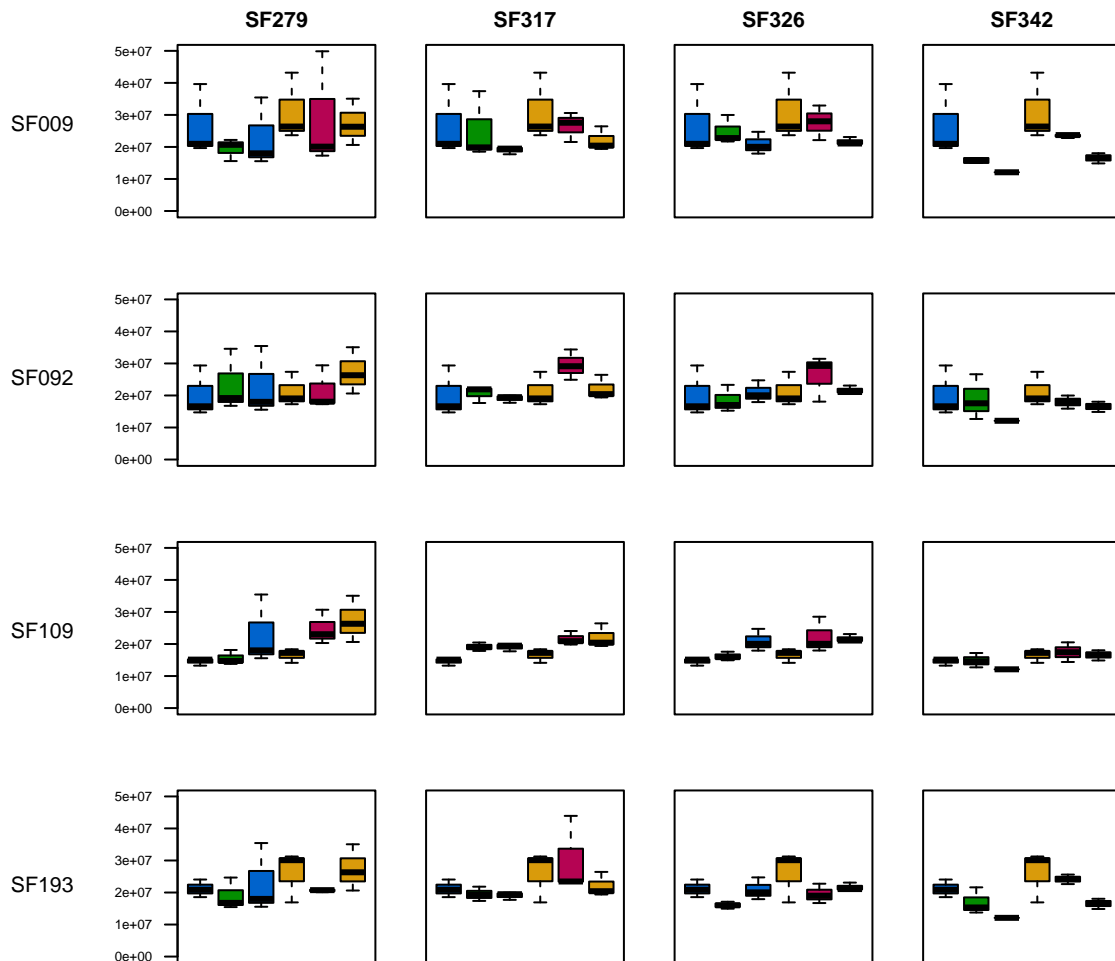



HanXRQChr10g028871  
 Probable lactoylglutathione lyase /  
 glyoxalase I family protein

■ Parents WW  
 ■ Parents WD  
 ■ Hybrids WW  
 ■ Hybrids WD

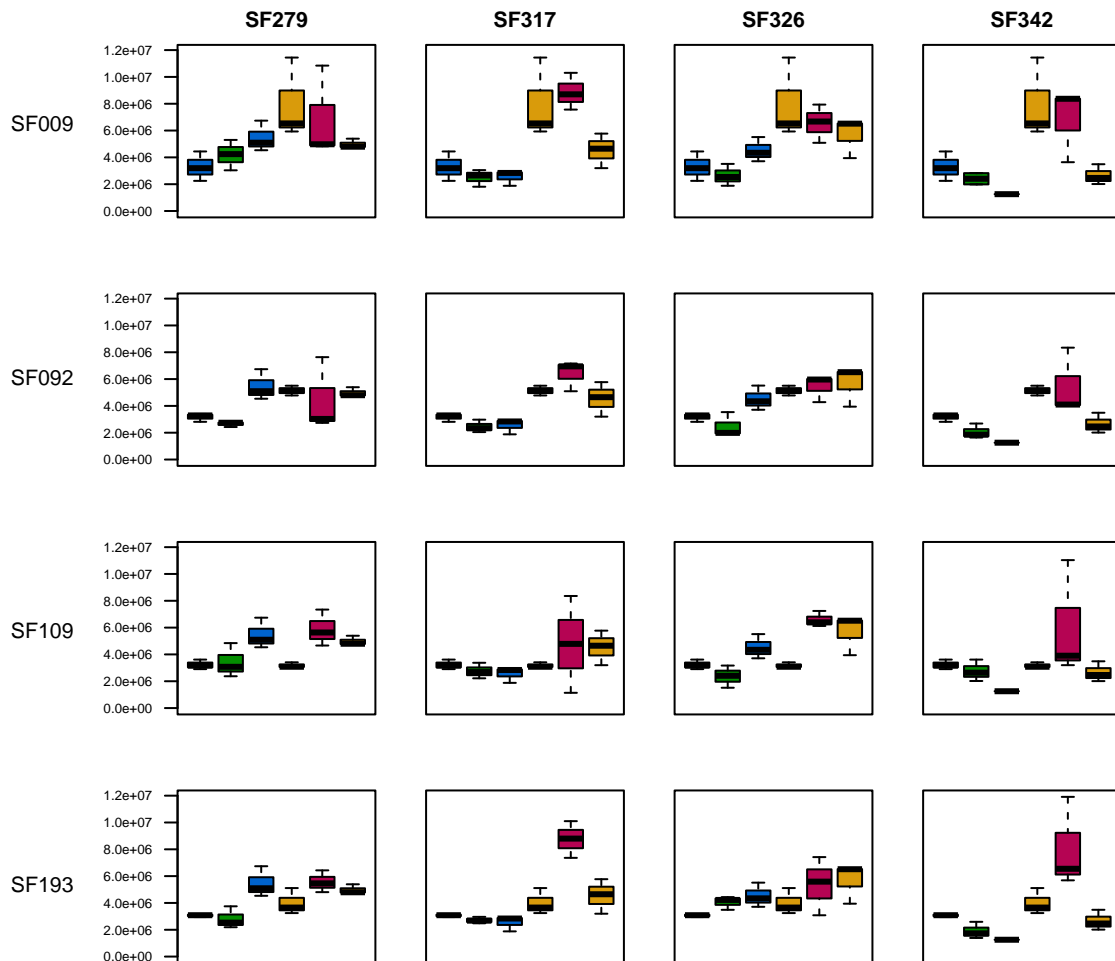

HanXRQChr11g0339391  
Probable polyphenol oxidase F,  
chloroplastic

Parents WW  
Parents WD  
Hybrids WW  
Hybrids WD

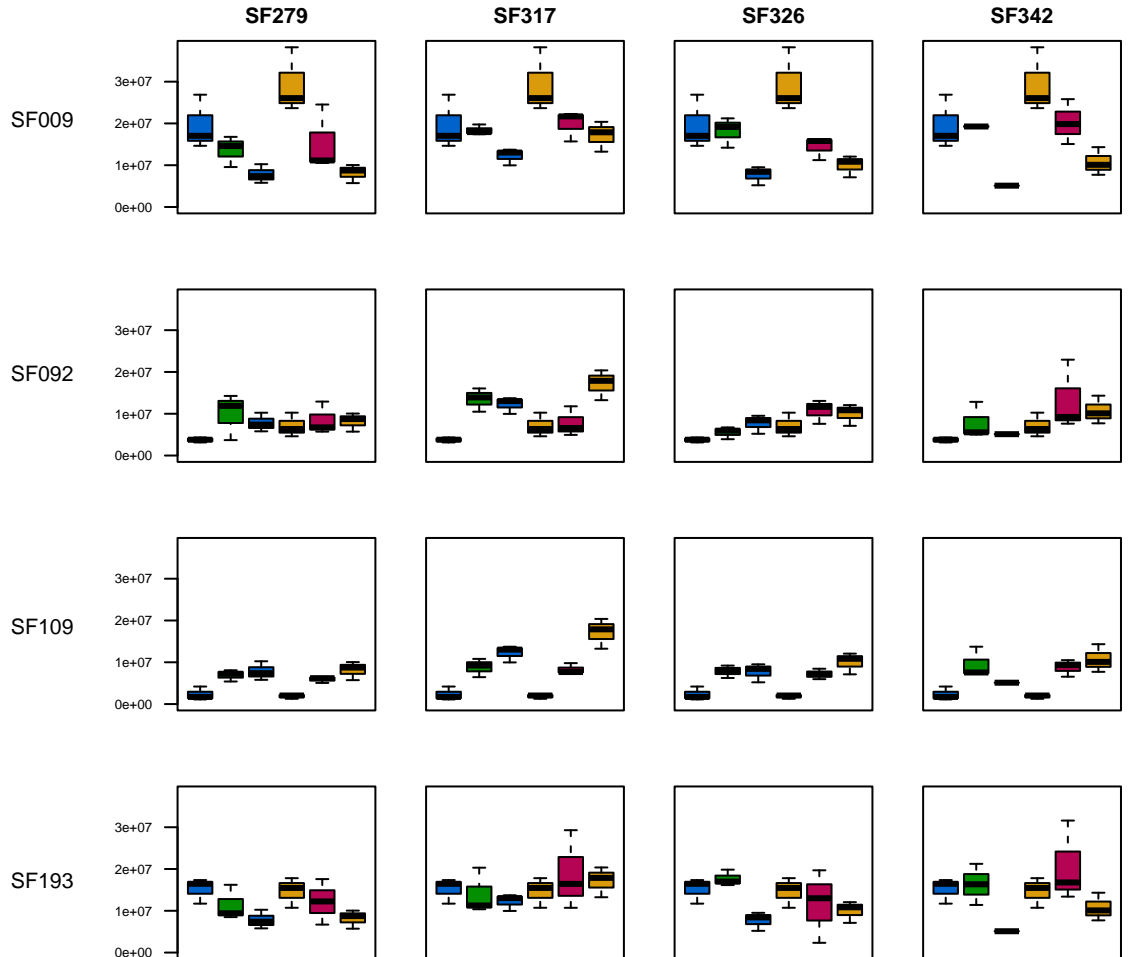

HanXRQChr09g0263691  
Probable PLC-like phosphodiesterases  
superfamily protein

Parents WW  
Parents WD  
Hybrids WW  
Hybrids WD

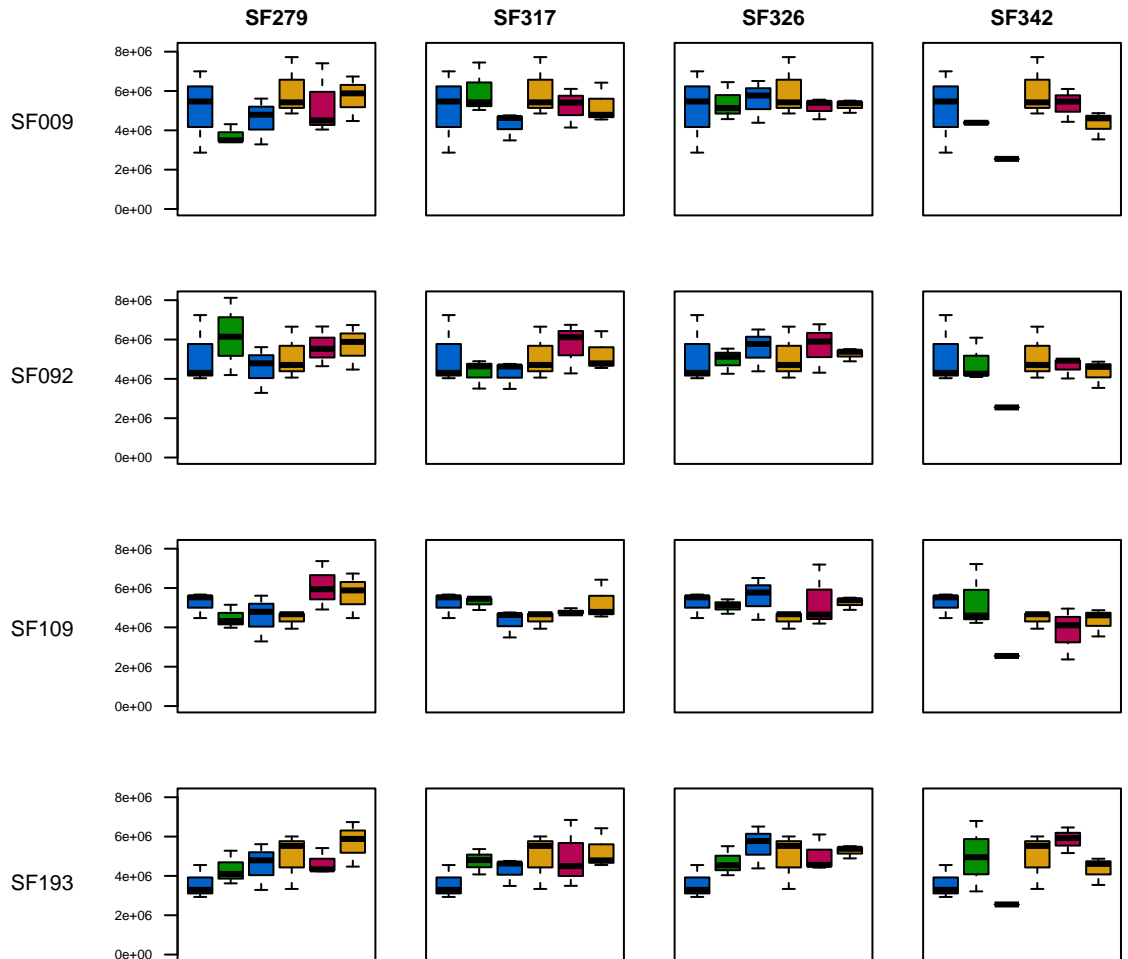

HanXRQChr06g0164901  
Probable double Clp-N motif protein

Parents WW  
Parents WD  
Hybrids WW  
Hybrids WD

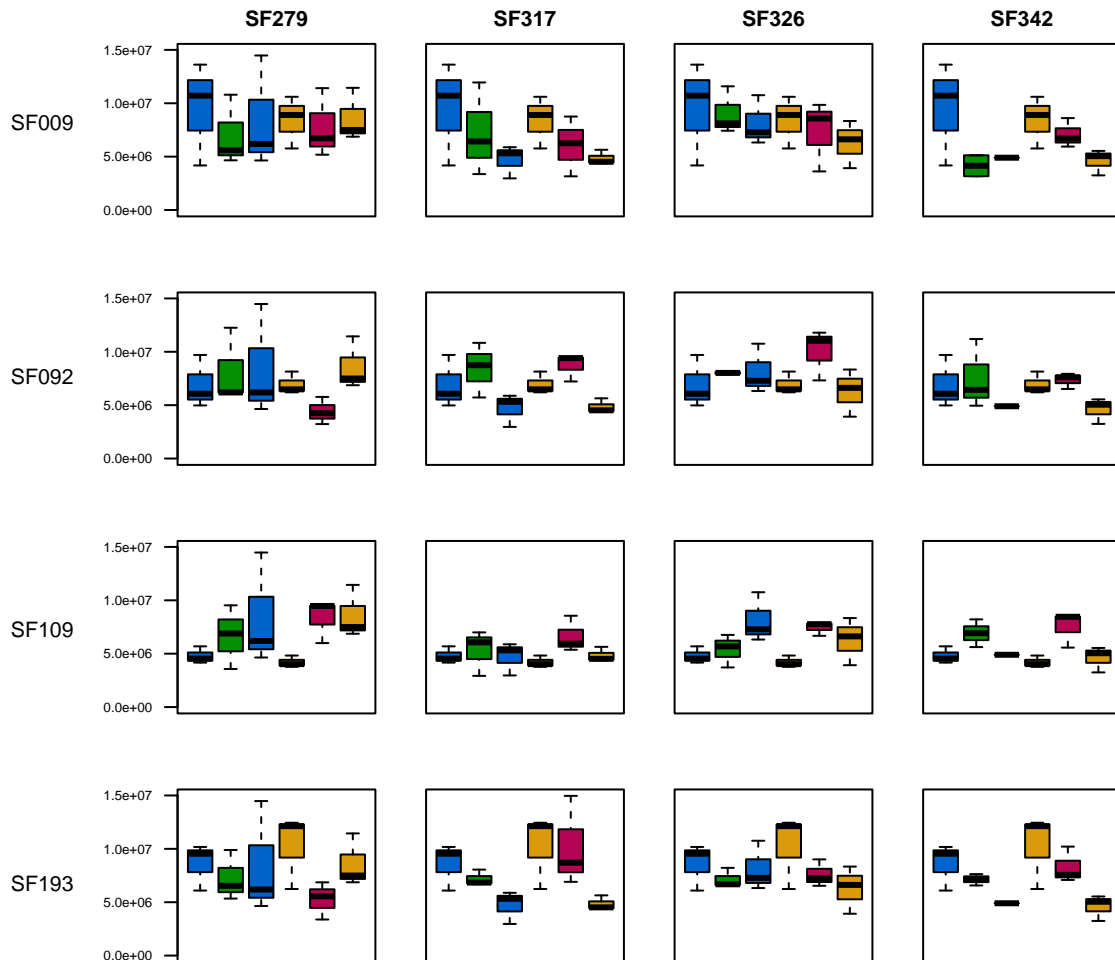

HanXRQChr15g0484171  
Probable ribosomal L29 family protein

- Parents WW
- Parents WD
- Hybrids WW
- Hybrids WD

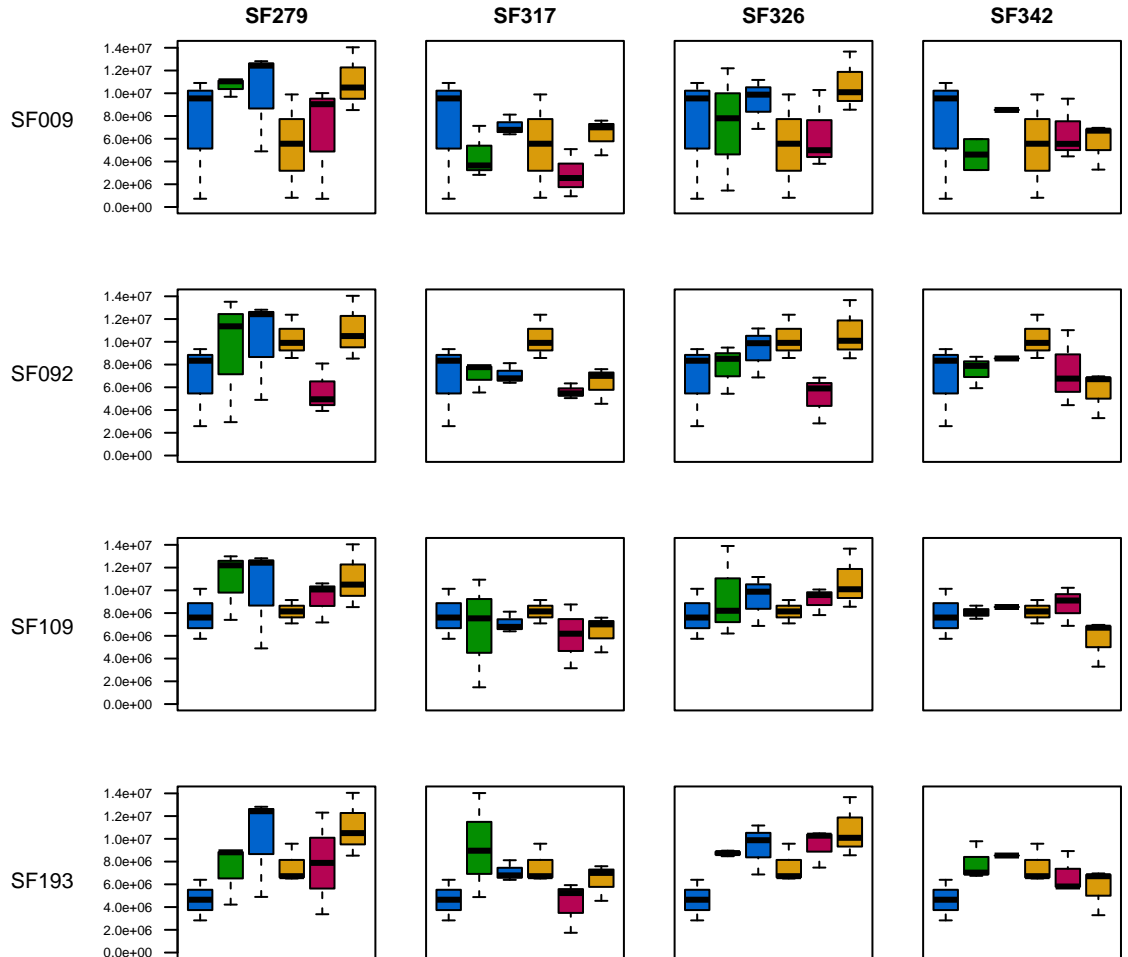

HanXRQChr08g0217841  
Putative heavy metal-associated domain,  
HMA

Parents WW  
Parents WD  
Hybrids WW  
Hybrids WD

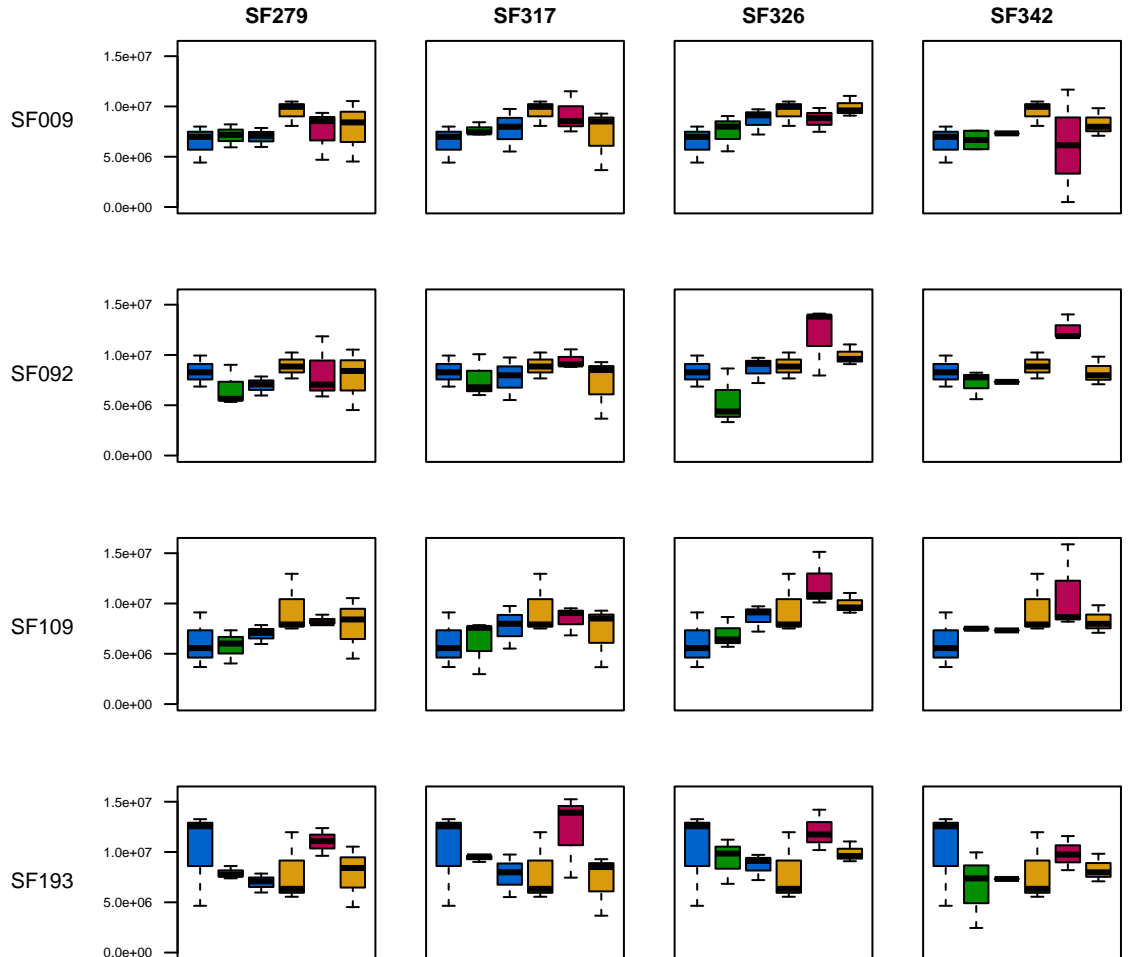

HanXRQChr13g0389801  
Putative alpha-hydroxy acid  
dehydrogenase, FMN-dependent; Aldolase

Parents WW  
Parents WD  
Hybrids WW  
Hybrids WD

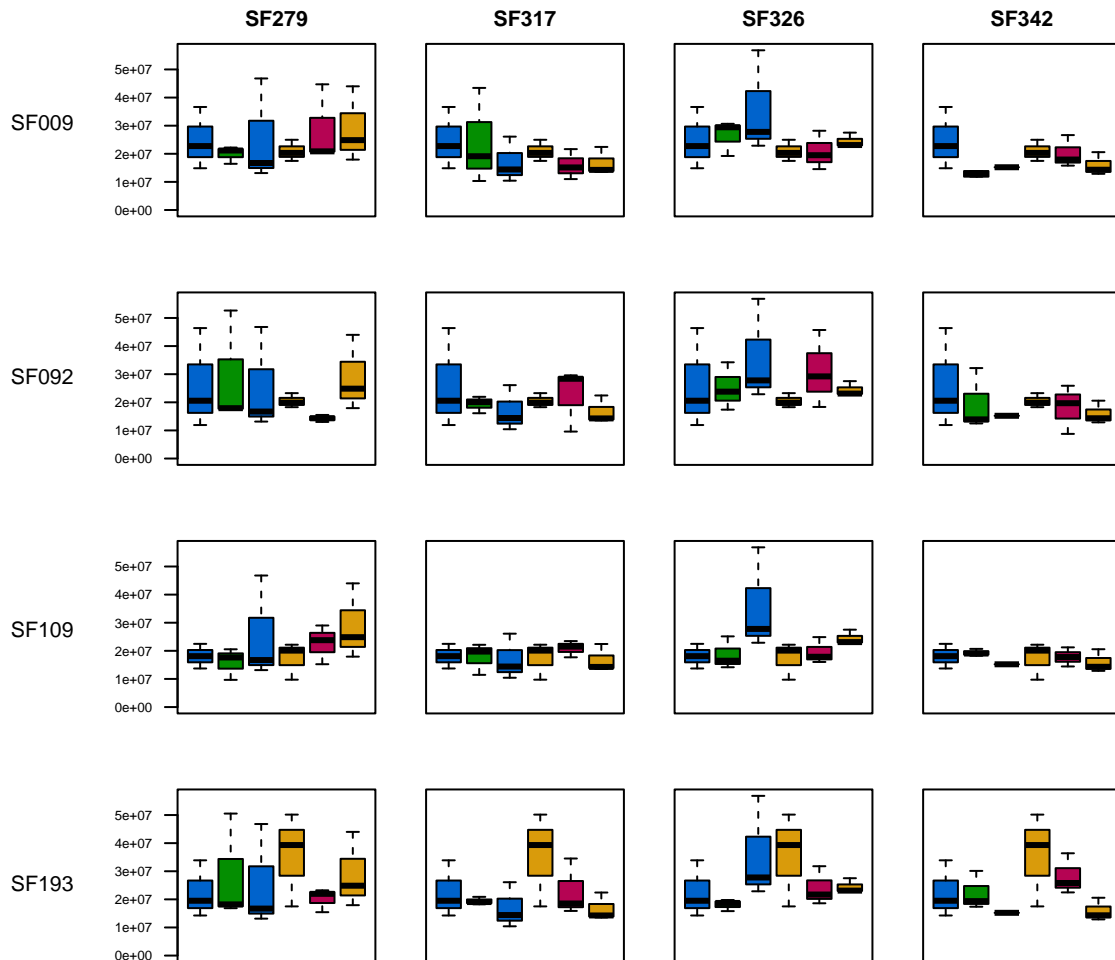

HanXRQChr05g0153941  
Probable adenylate kinase 4

Parents WW  
Parents WD  
Hybrids WW  
Hybrids WD

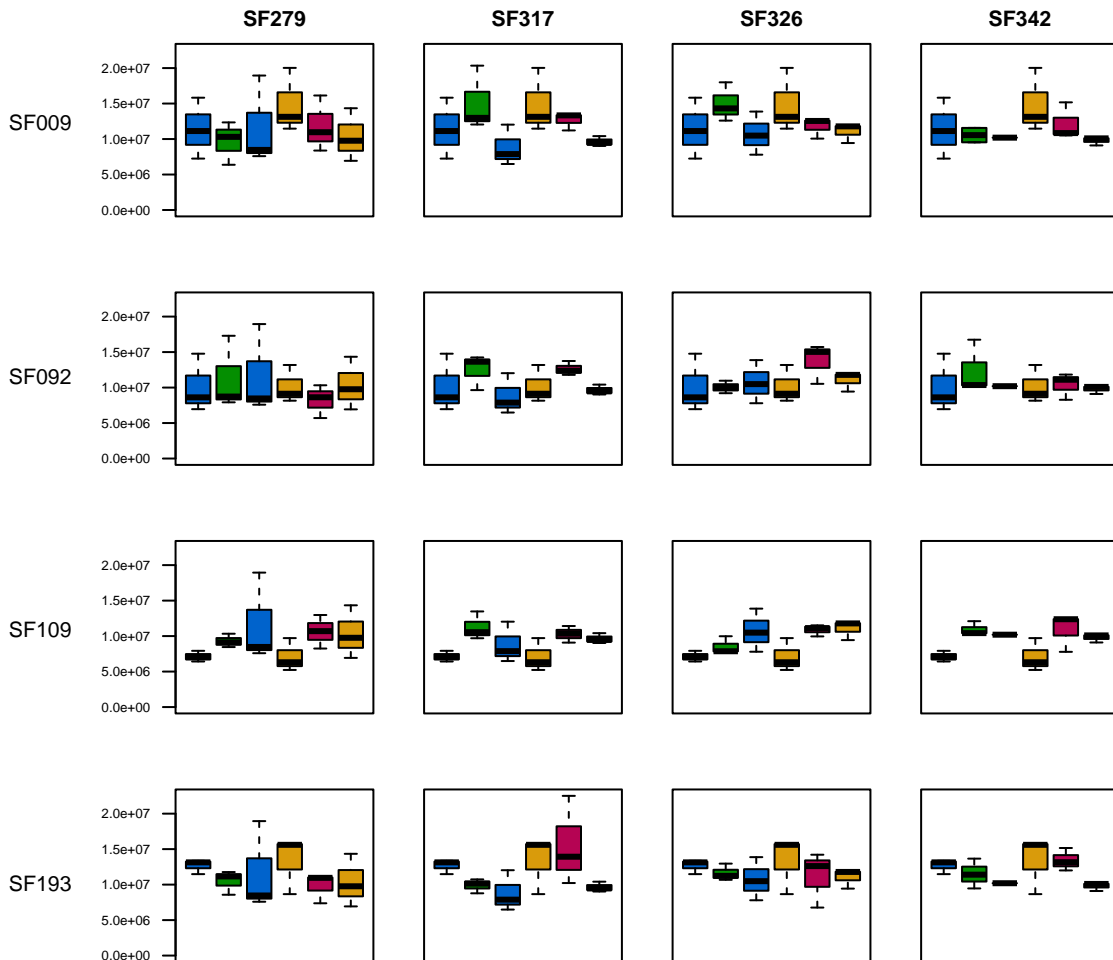



HanXRQChr09g0241901  
Putative psbP family

- Parents WW
- Parents WD
- Hybrids WW
- Hybrids WD

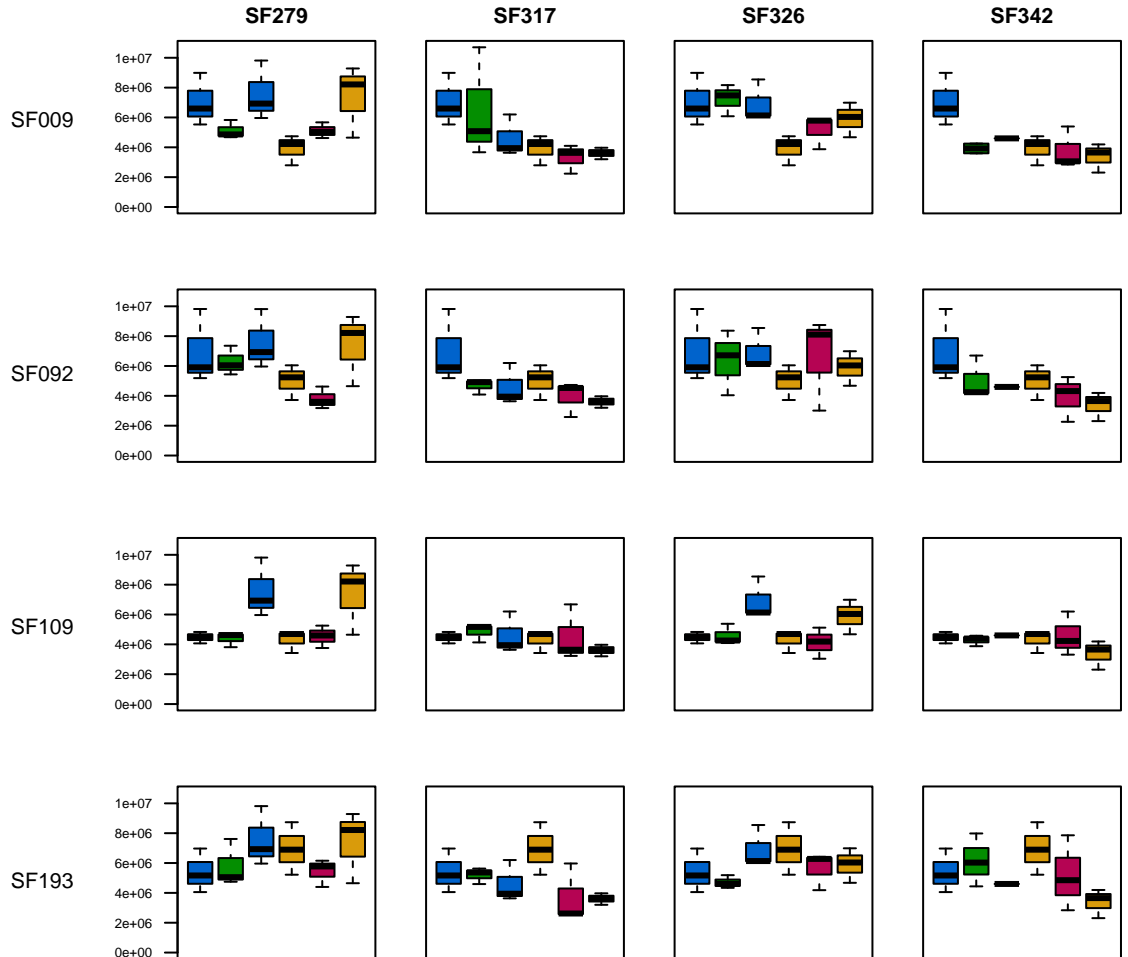

HanXRQChr11g0337711  
Probable alanyl-tRNA synthetase

Parents WW  
Parents WD  
Hybrids WW  
Hybrids WD

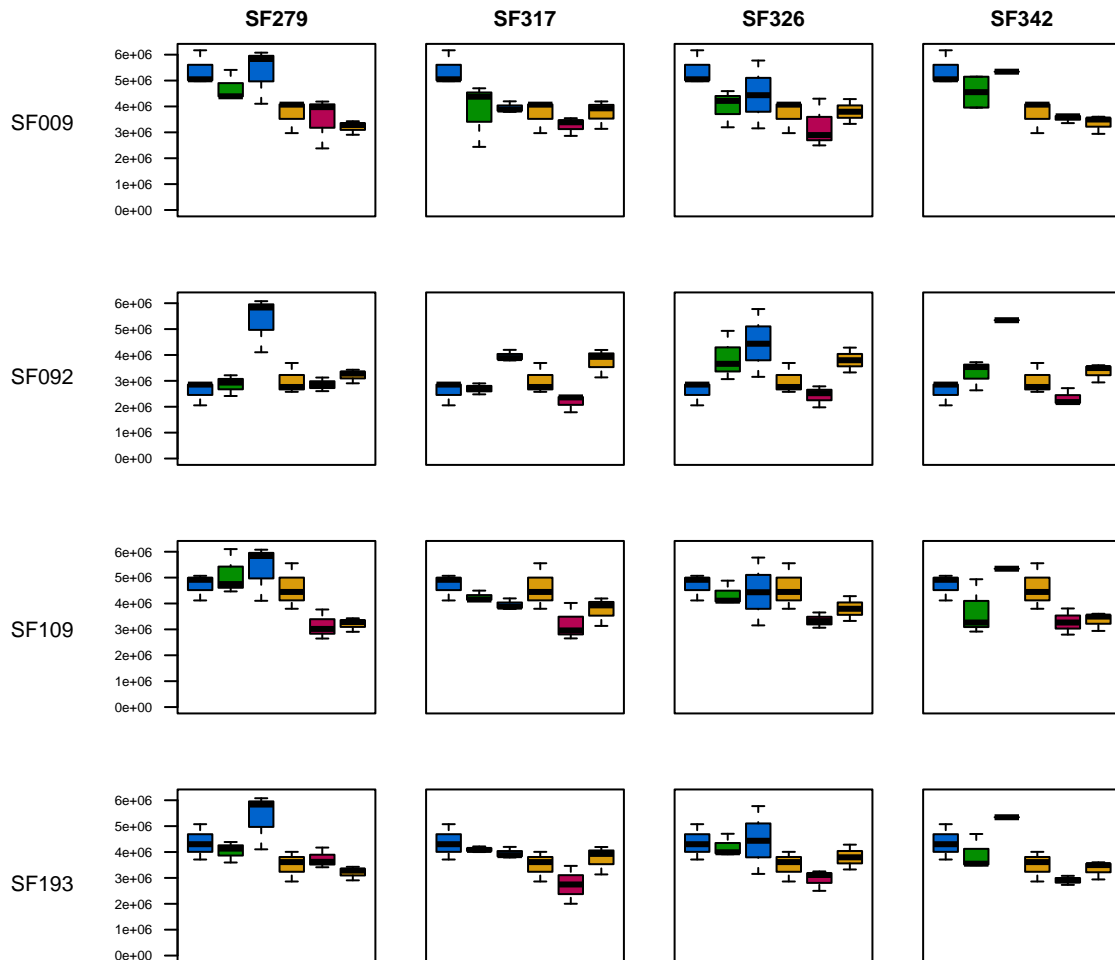

HanXRQChr14g0462681  
Putative pyruvate kinase; Pyruvate  
kinase, barrel

Parents WW  
Parents WD  
Hybrids WW  
Hybrids WD

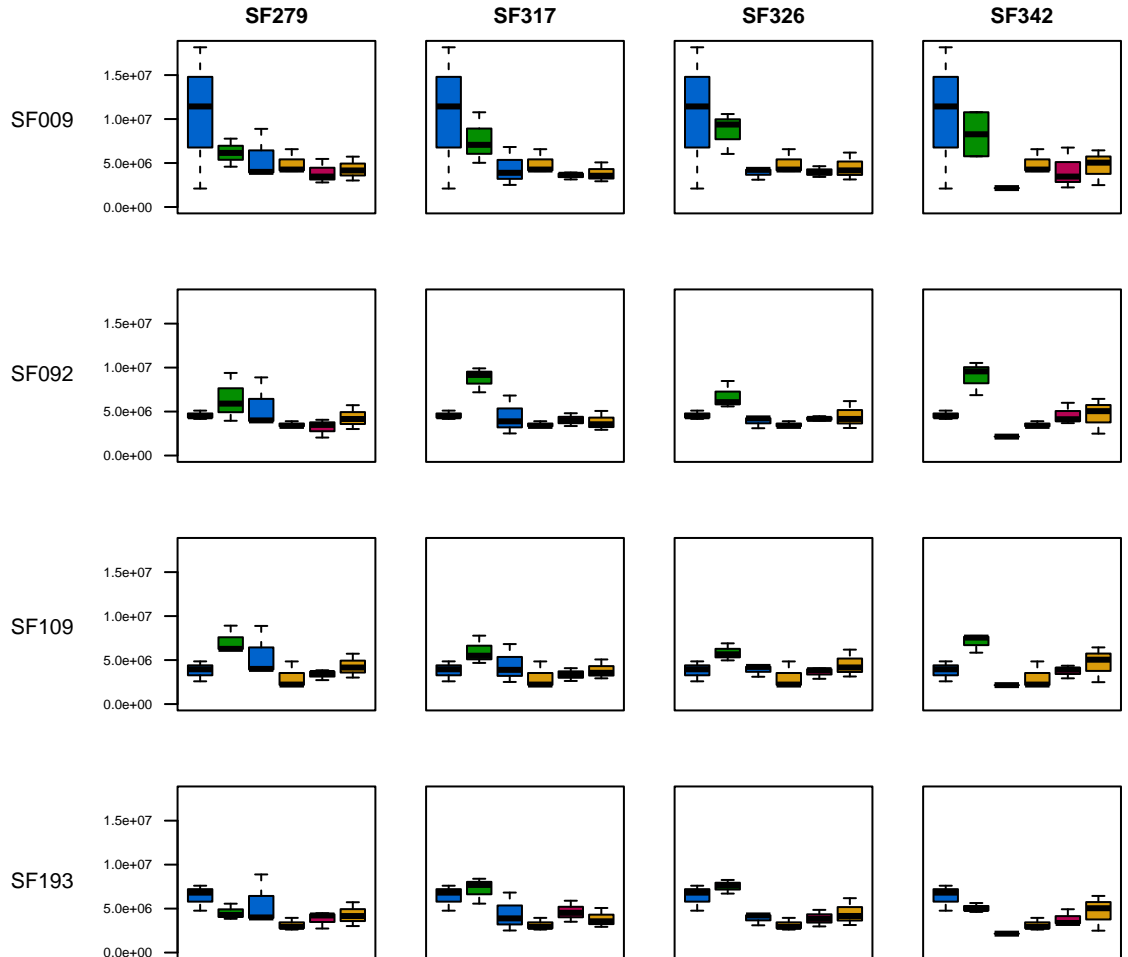

HanXRQCPg0580121  
Putative photosystem antenna  
protein-like

Parents WW  
Parents WD  
Hybrids WW  
Hybrids WD

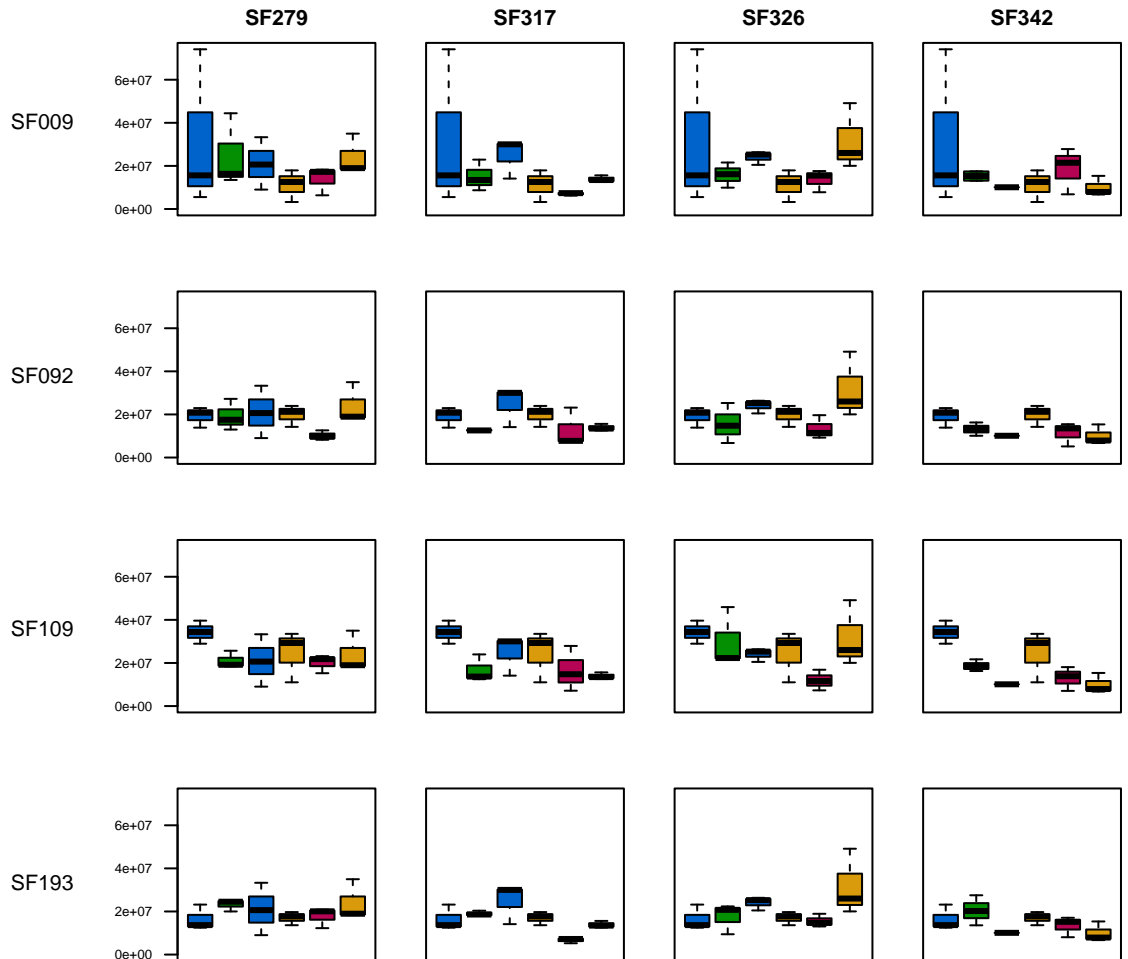

HanXRQChr10g0312371  
 Probable dihydrolipoamide  
 acetyltransferase, long form protein

Parents WW  
 Parents WD  
 Hybrids WW  
 Hybrids WD

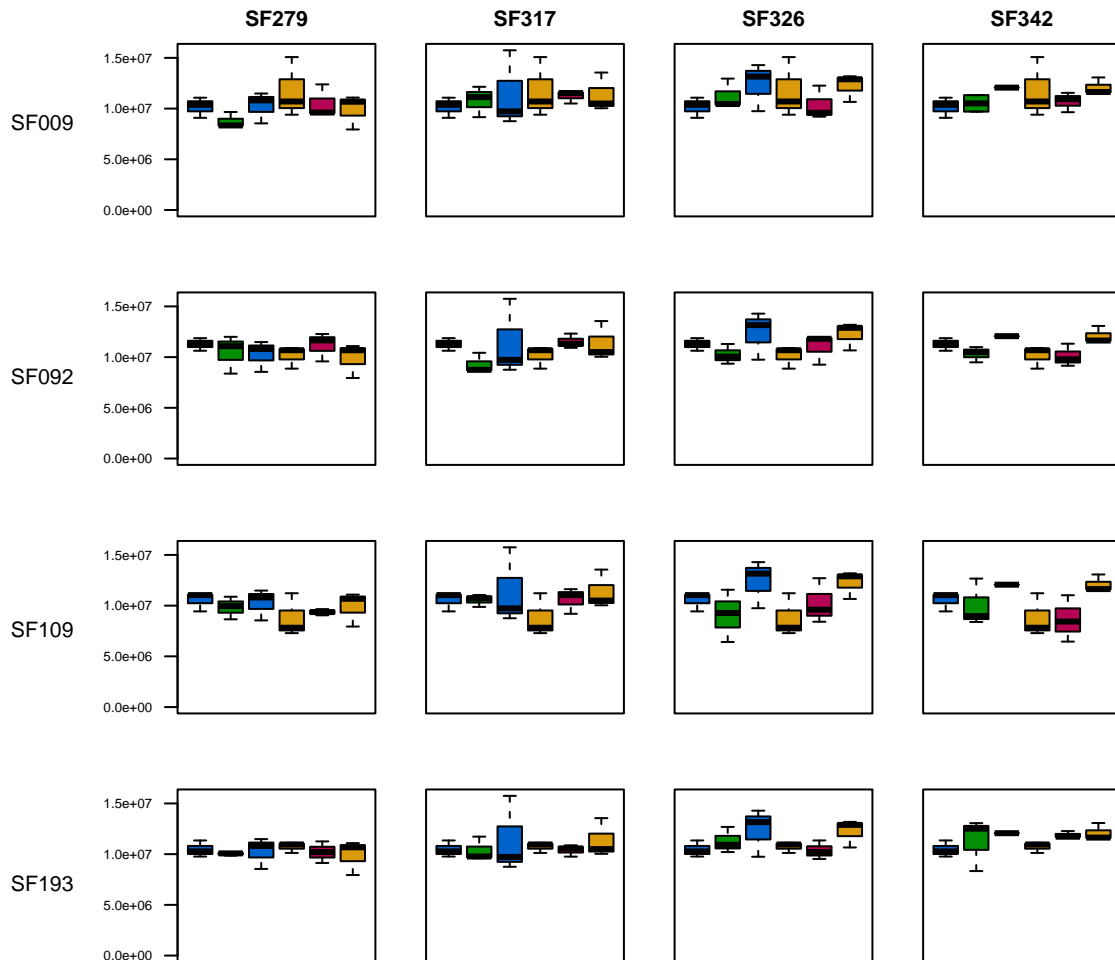

HanXRQChr16g0521181  
Putative tetratricopeptide-like helical  
domain

Parents WW  
Parents WD  
Hybrids WW  
Hybrids WD

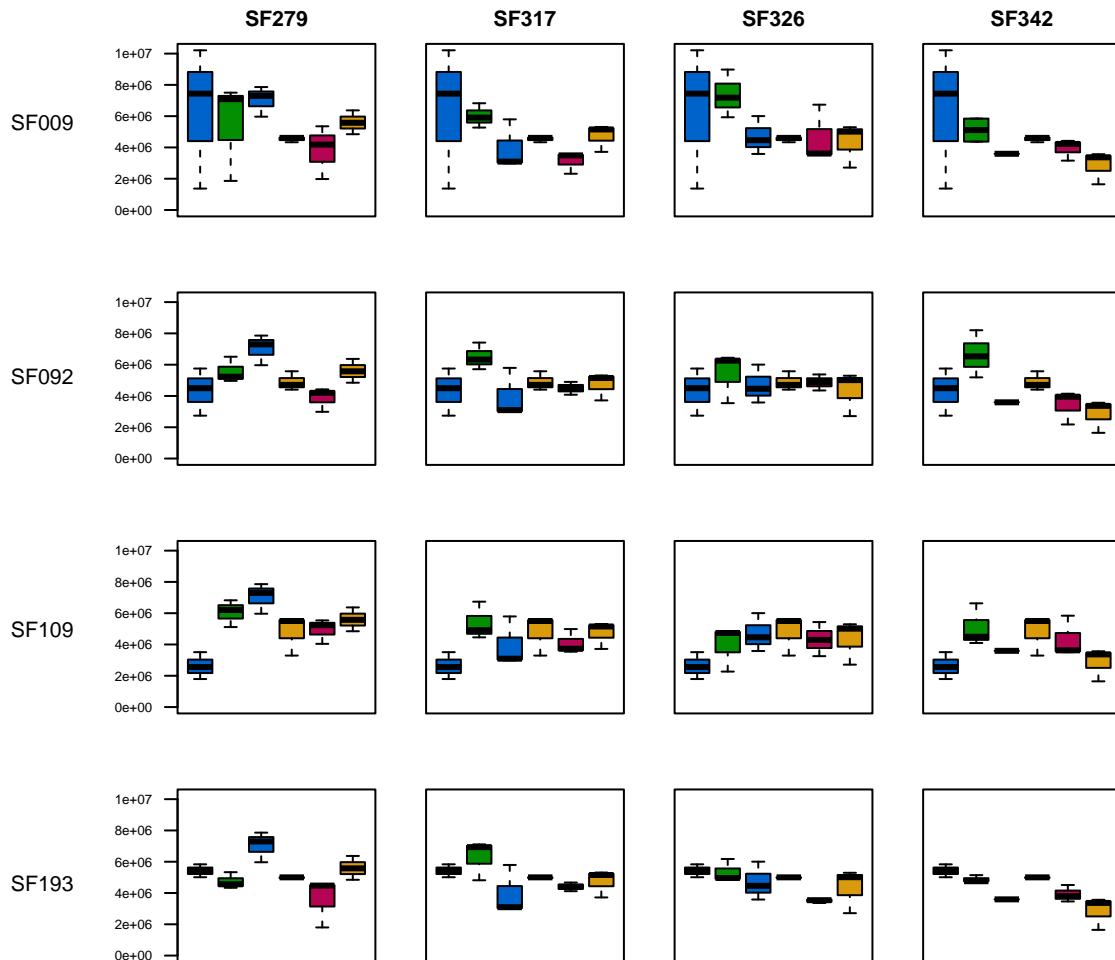

HanXRQChr04g0128121  
Putative RNA recognition motif domain,  
eukaryote; Polyadenylate binding protein, h

Parents WW  
Parents WD  
Hybrids WW  
Hybrids WD

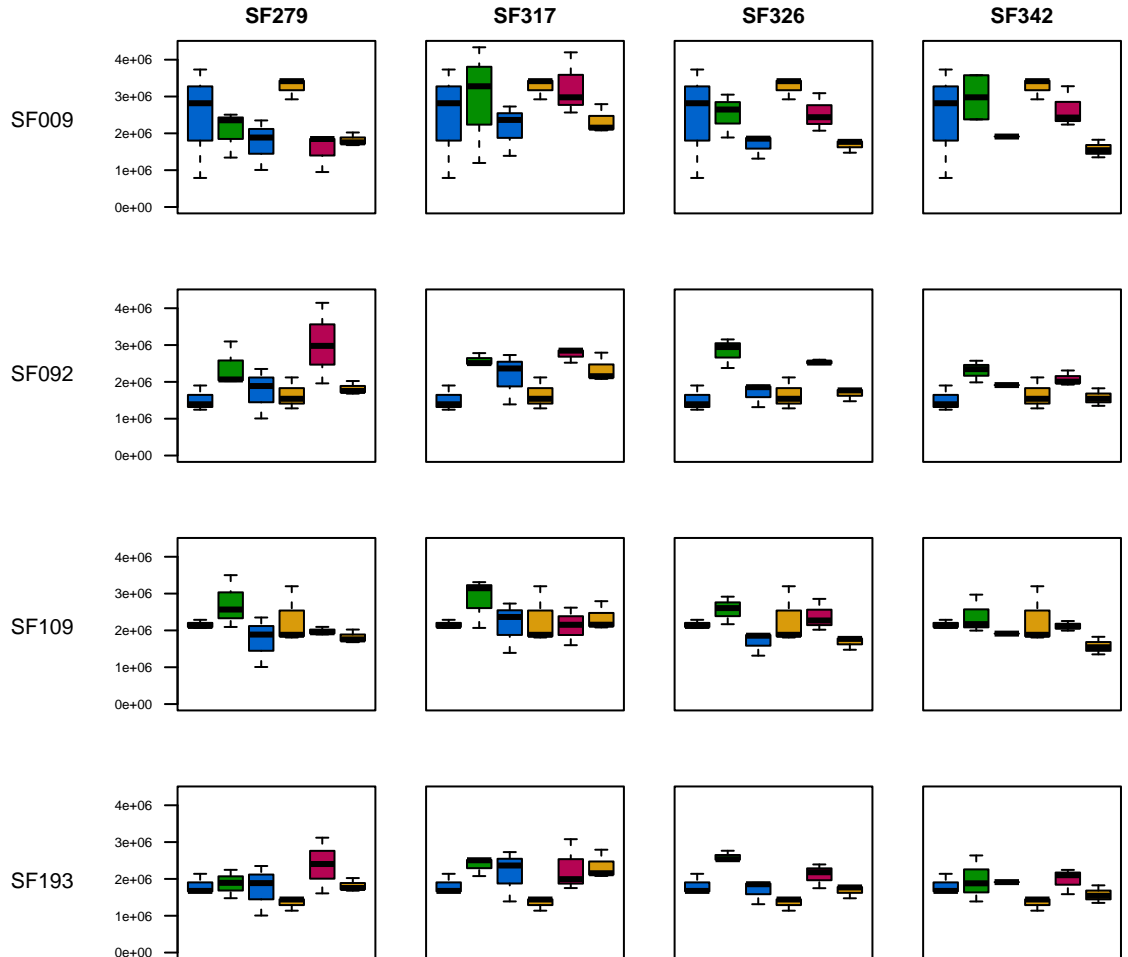

HanXRQChr05g0149631  
 Probable thylakoid lumenal 29 kDa  
 protein, chloroplastic

Parents WW  
 Parents WD  
 Hybrids WW  
 Hybrids WD

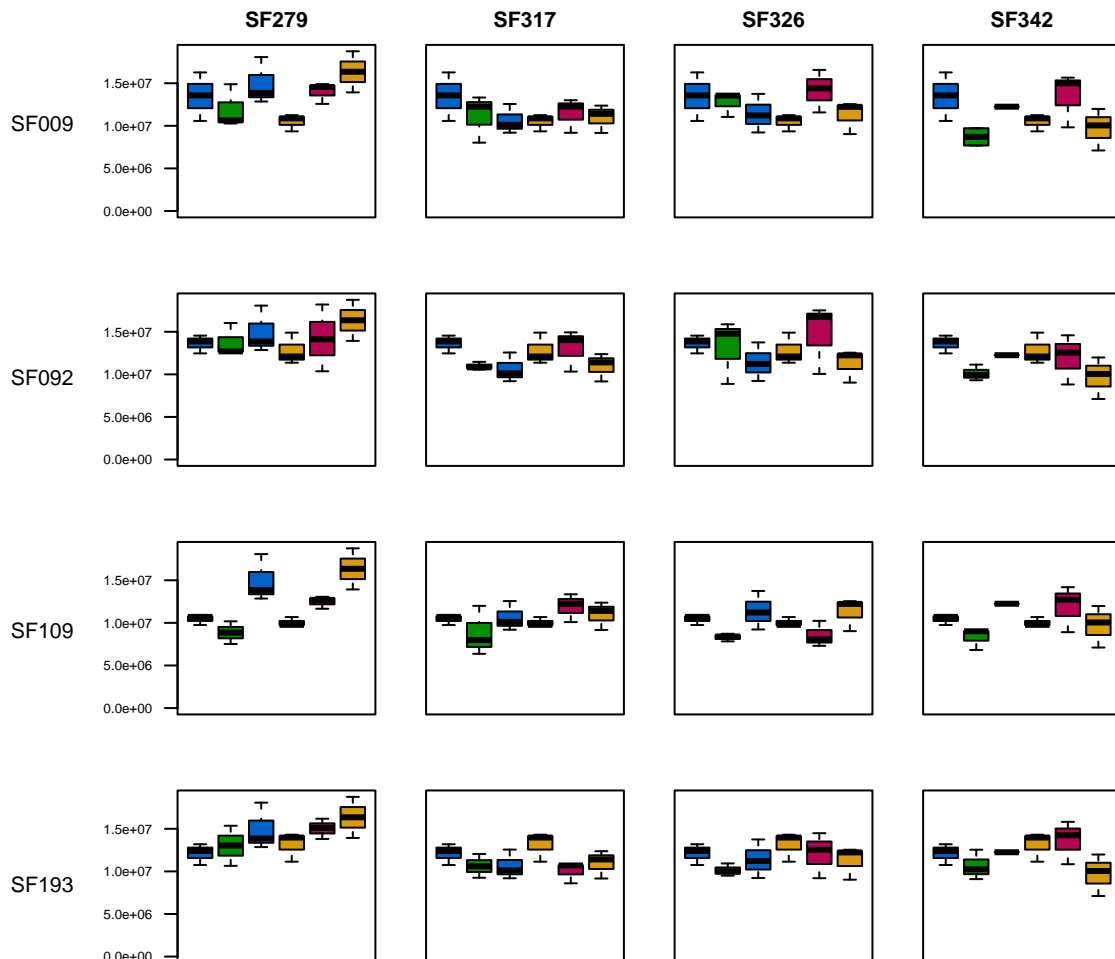



HanXRQChr09g0270241  
Putative nucleotide-binding alpha-beta  
plait domain

Parents WW  
Parents WD  
Hybrids WW  
Hybrids WD

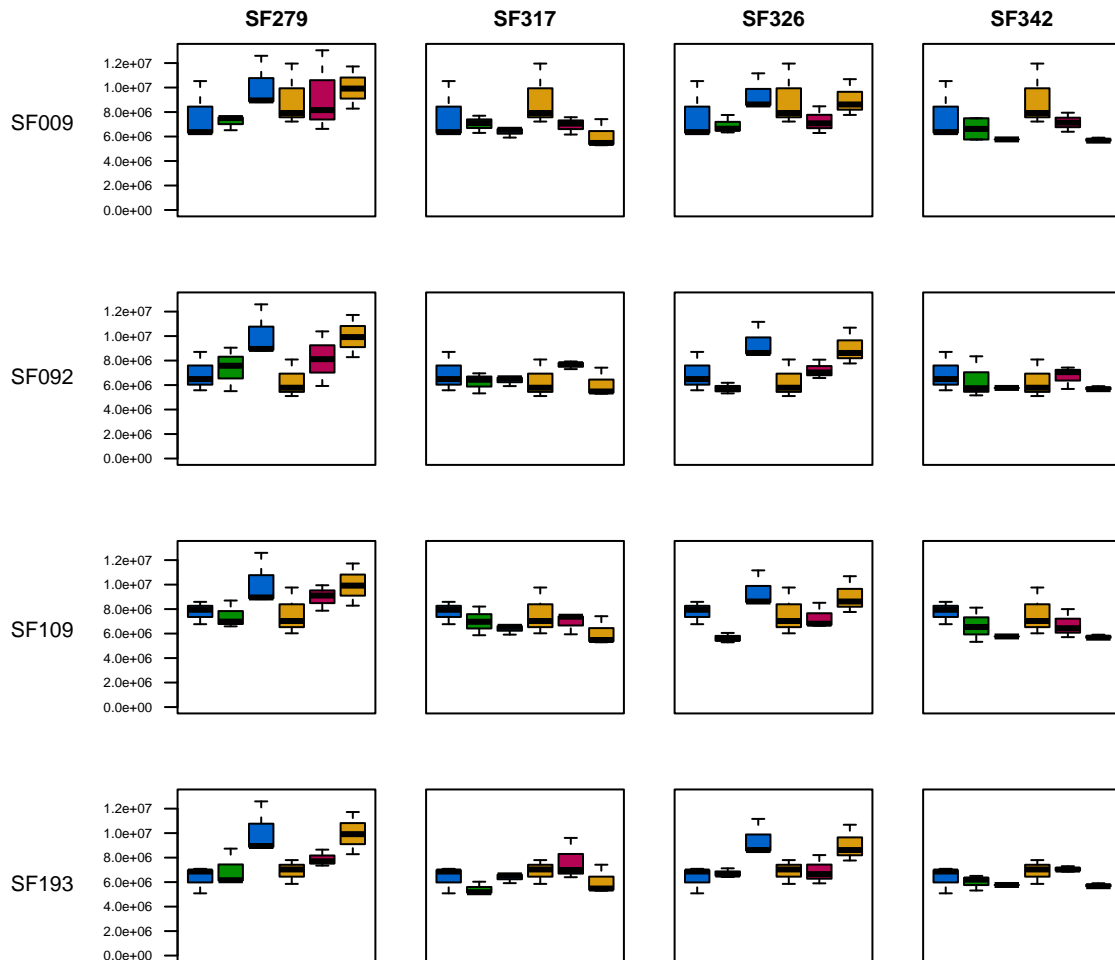

HanXRQChr16g0510681  
Probable hyaluronan / mRNA binding  
family

Parents WW  
Parents WD  
Hybrids WW  
Hybrids WD

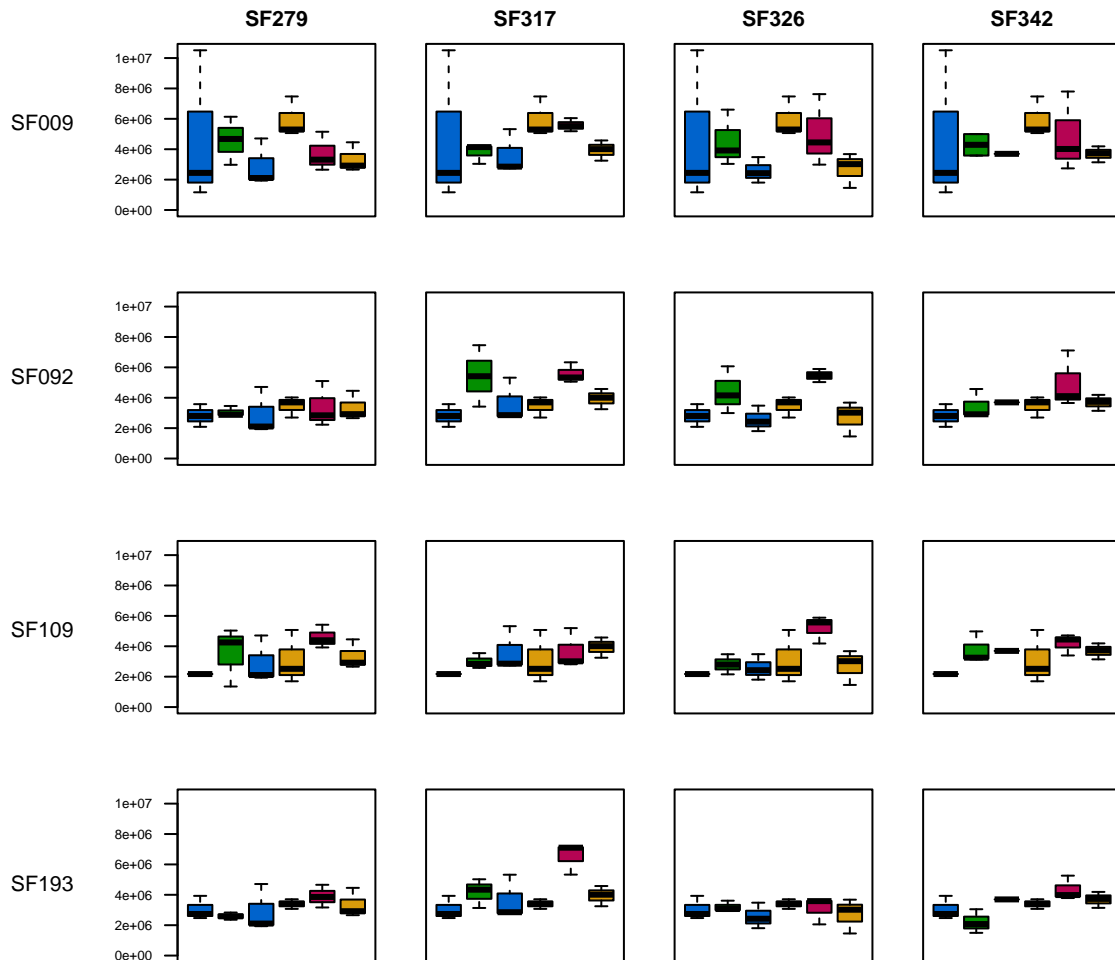

HanXRQChr04g0119921  
Putative pyruvate dehydrogenase  
(acetyl-transferring) E1 component, alpha s

Parents WW  
Parents WD  
Hybrids WW  
Hybrids WD

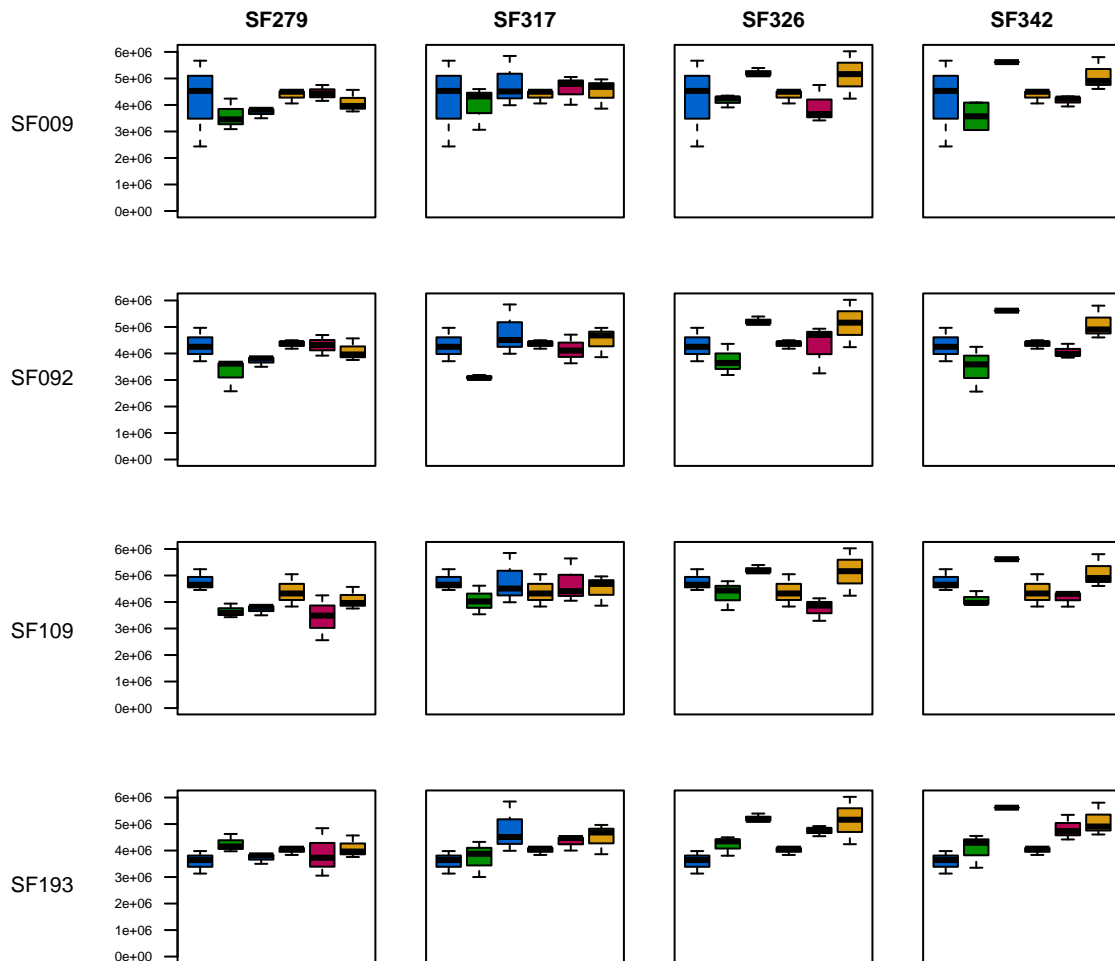

HanXRQCPg0579941  
Putative ribosomal protein S4,  
bacterial-type; Ribosomal protein S4/S9

Parents WW  
Parents WD  
Hybrids WW  
Hybrids WD

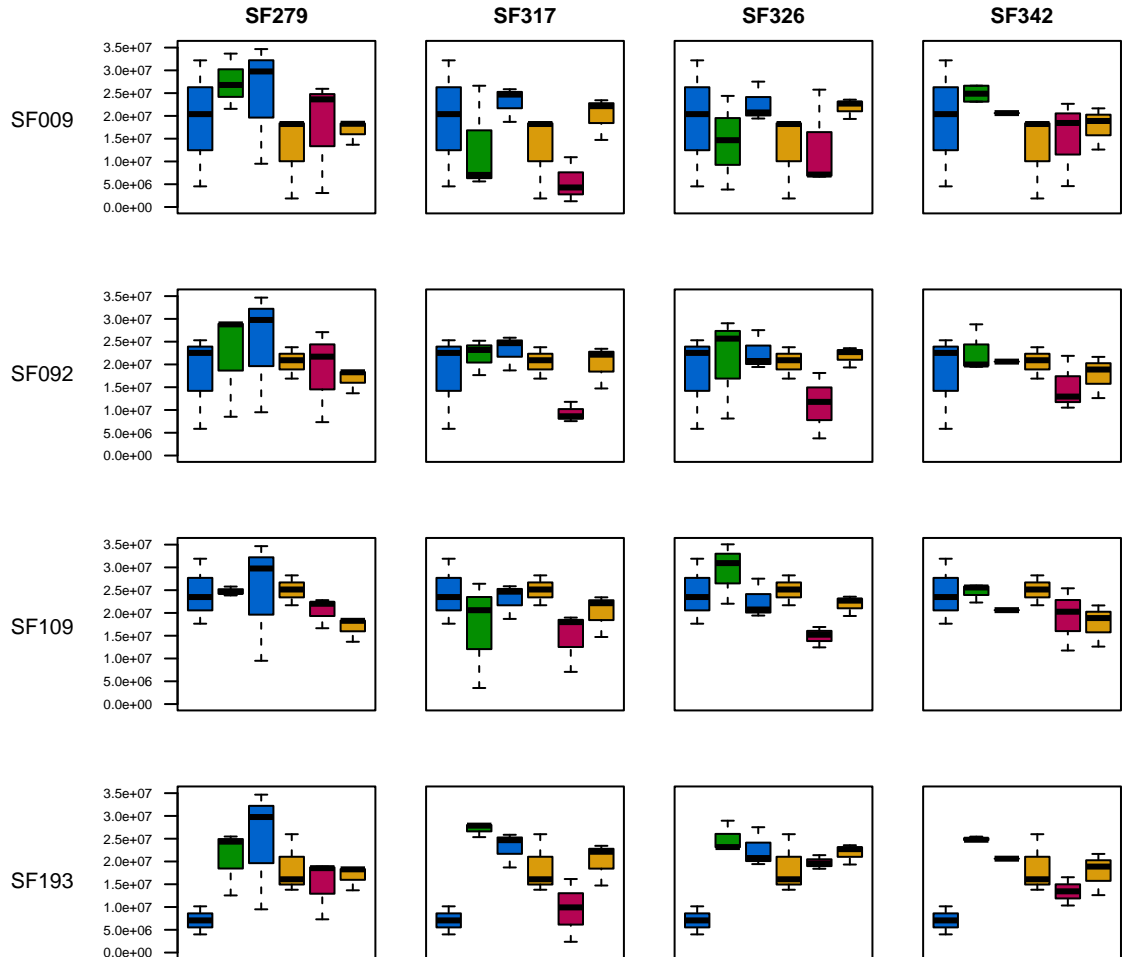

HanXRQChr05g0148211  
Probable dihydrolipoyl dehydrogenase

■ Parents WW  
■ Parents WD  
■ Hybrids WW  
■ Hybrids WD

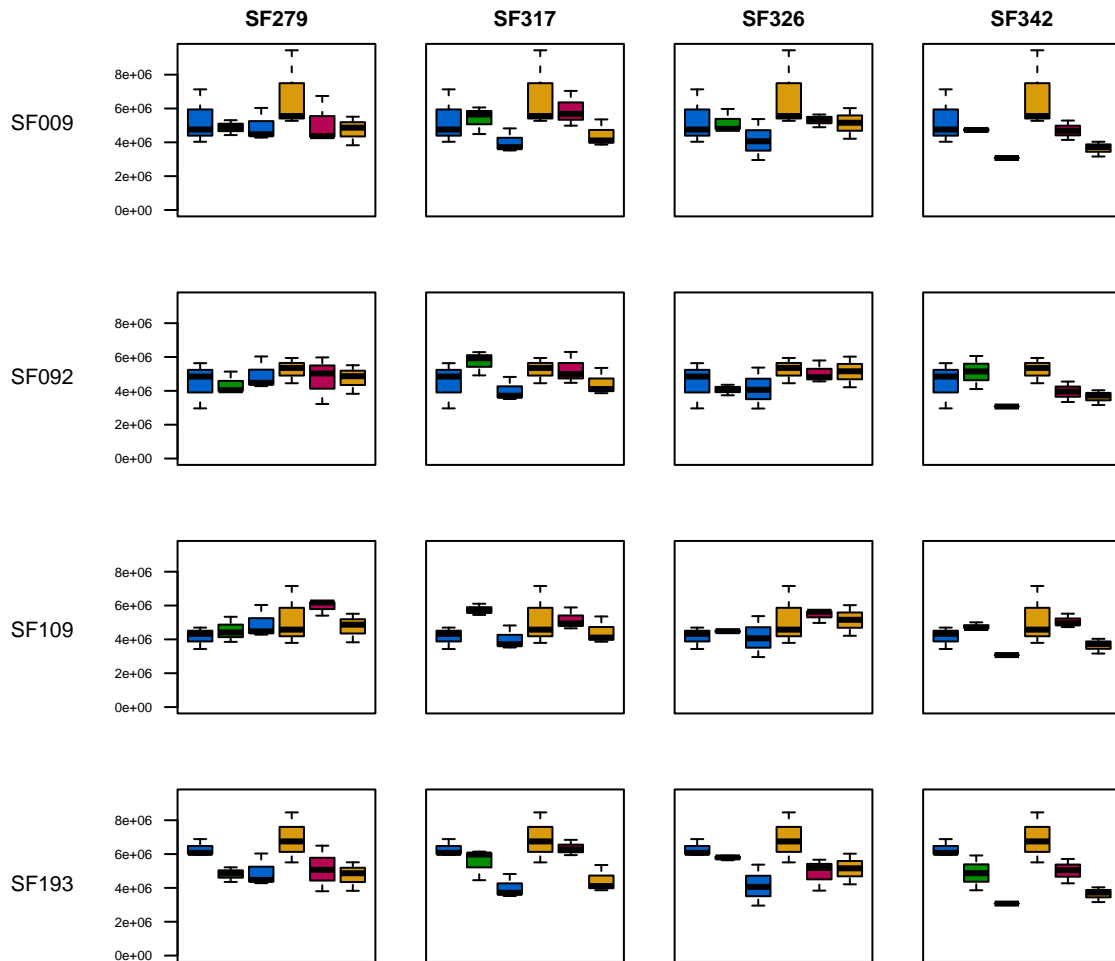

HanXRQChr08g0229841  
Probable chloroplast signal recognition  
particle 54 kDa subunit

Parents WW  
Parents WD  
Hybrids WW  
Hybrids WD

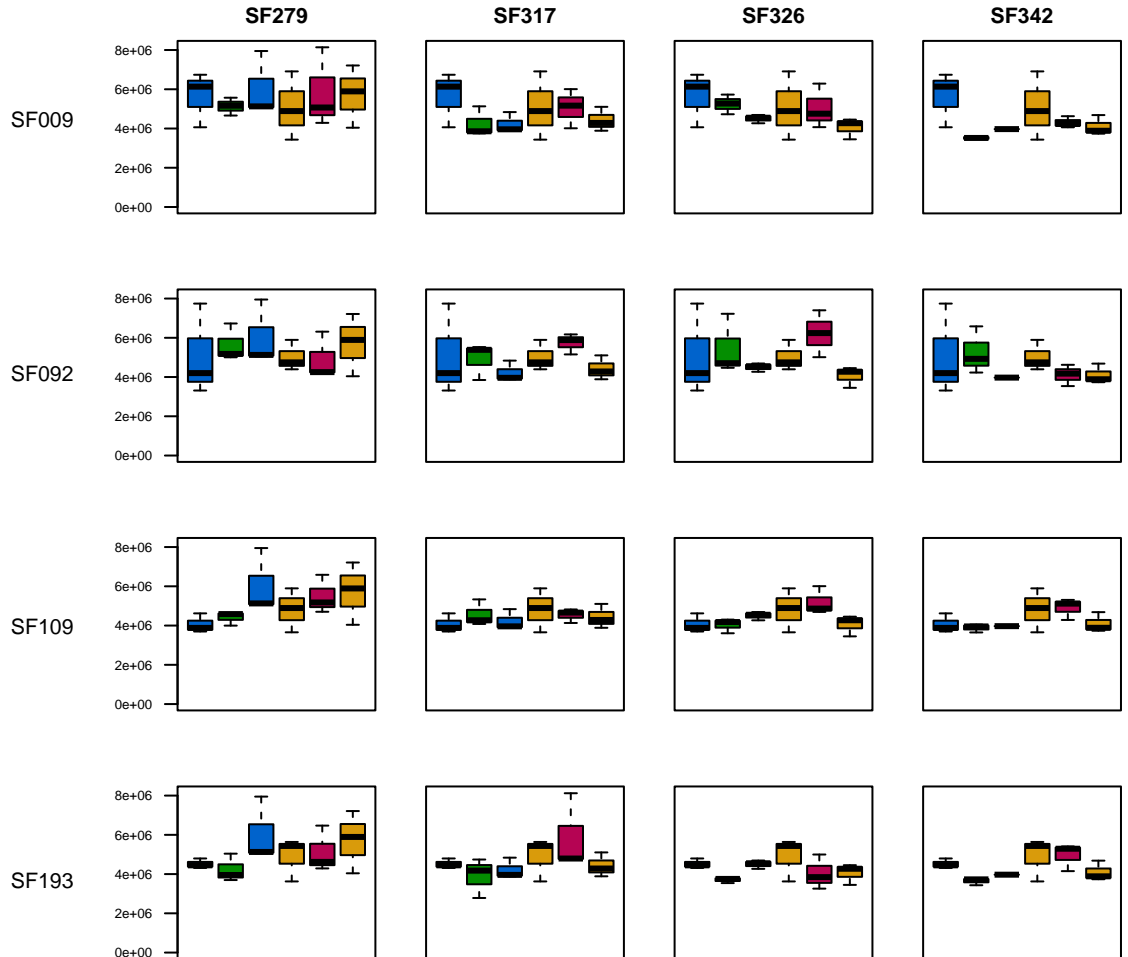

HanXRQChr11g0341881  
Probable eukaryotic translation  
initiation factor 3 subunit B

Parents WW  
Parents WD  
Hybrids WW  
Hybrids WD

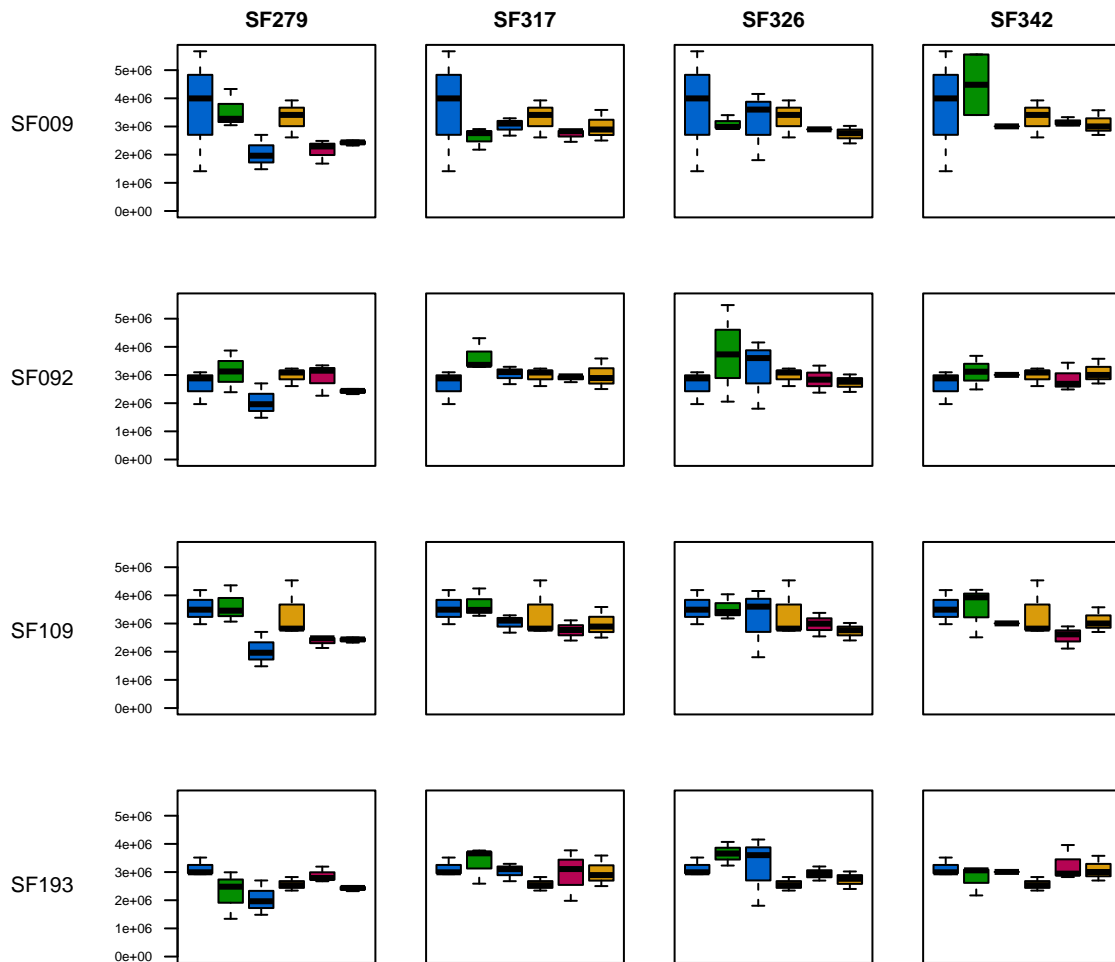

HanXRQChr05g0154341  
Probable psbP-like protein 1

Parents WW  
Parents WD  
Hybrids WW  
Hybrids WD

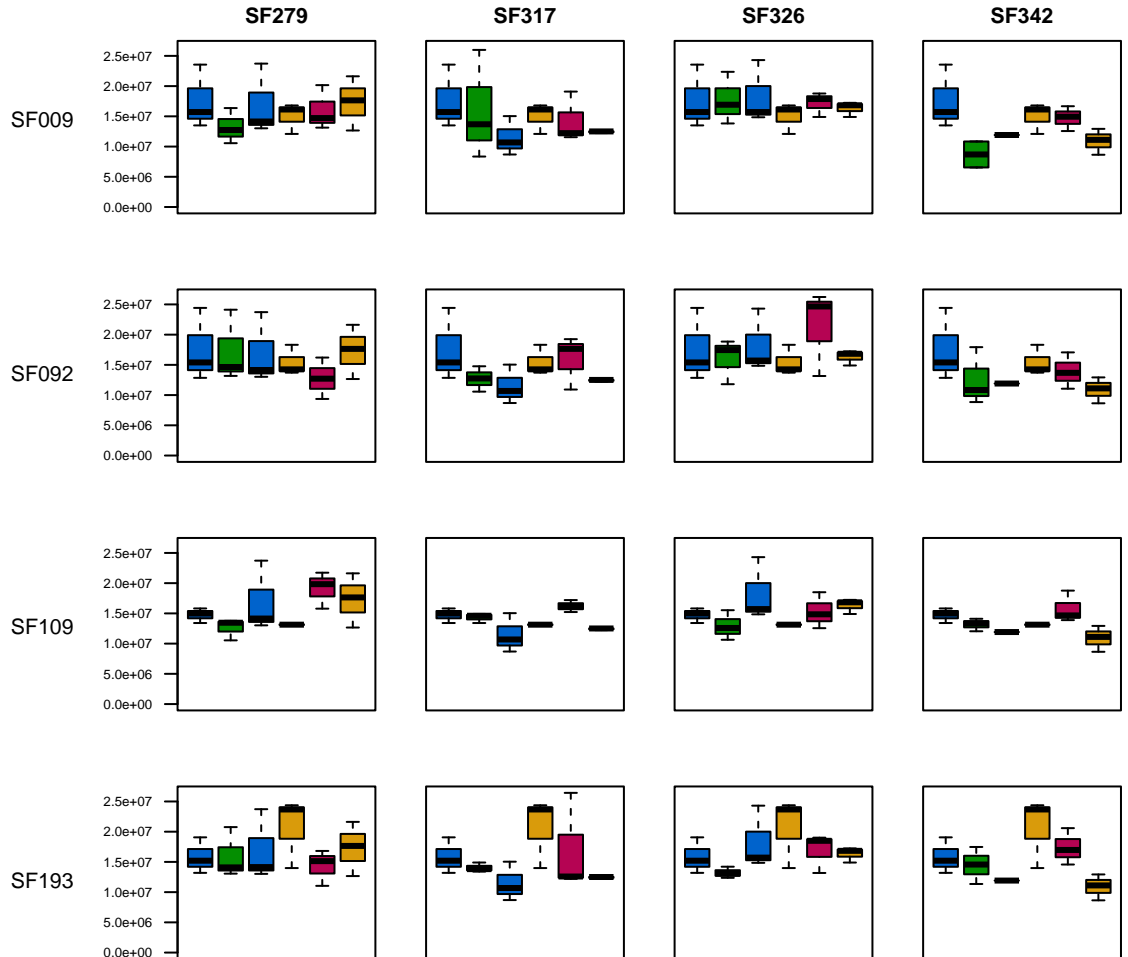



HanXRQChr00c0439g0574731  
Probable photosystem II D2 protein

- Parents WW
- Parents WD
- Hybrids WW
- Hybrids WD

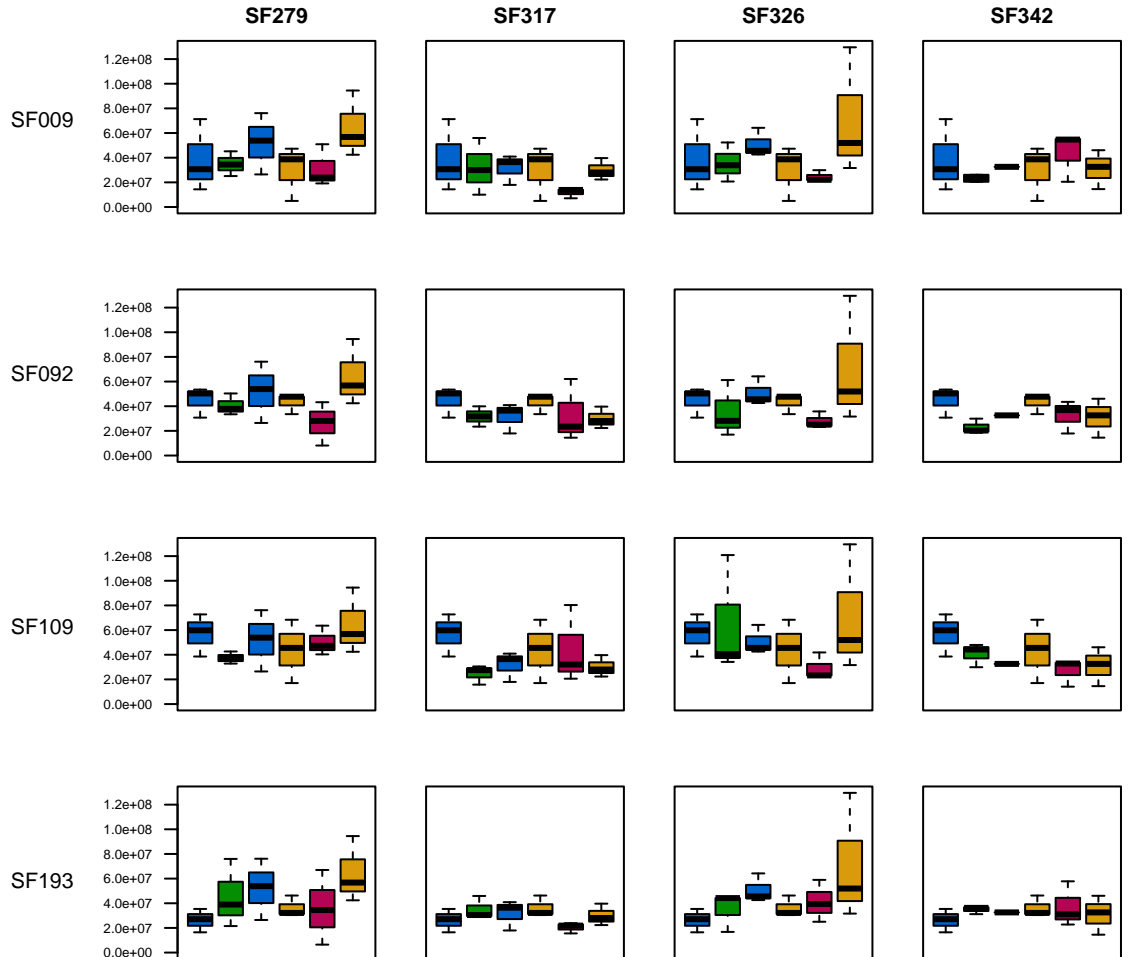

HanXRQChr06g0179691  
Probable  
S-adenosyl-L-methionine-dependent met

Parents WW  
Parents WD  
Hybrids WW  
Hybrids WD

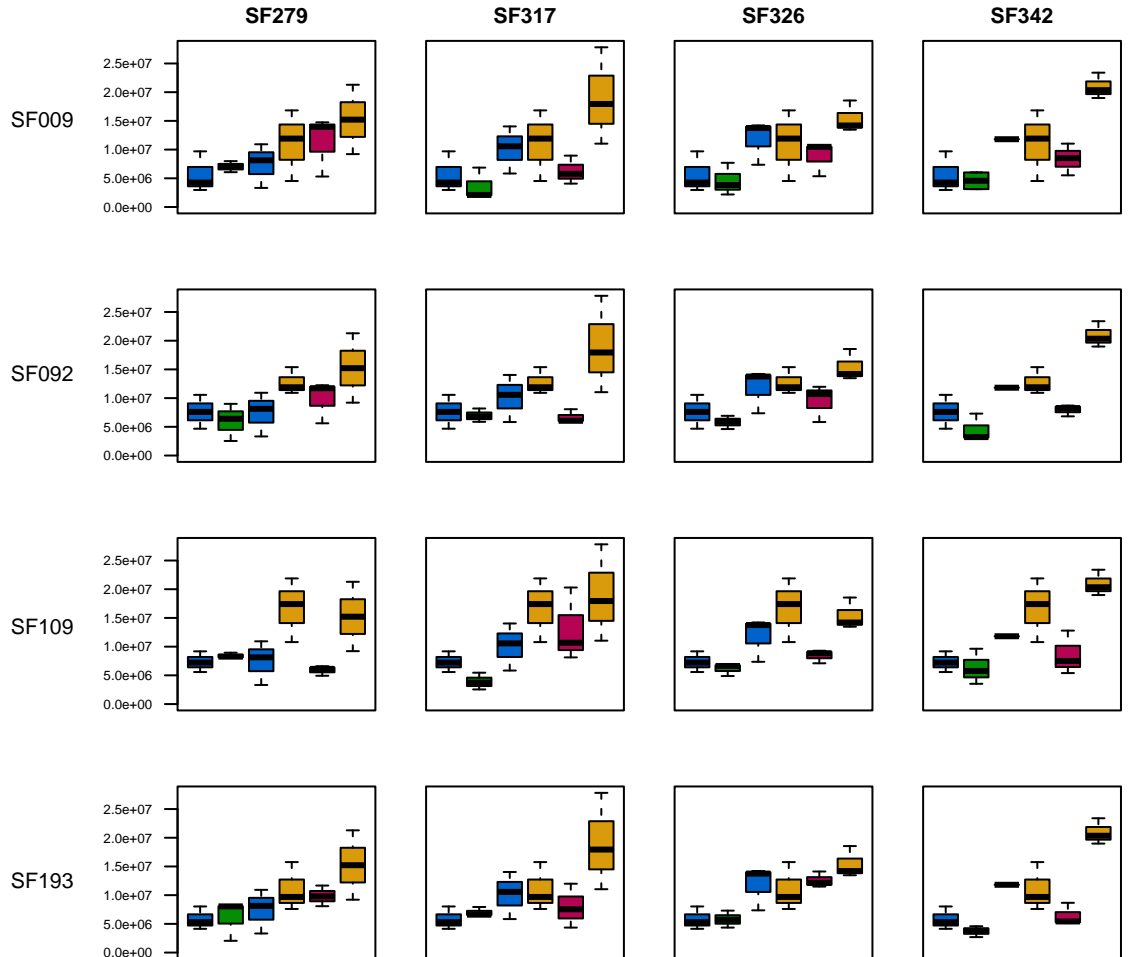

HanXRQChr11g0327161  
Probable magnesium chelatase i2

- Parents WW
- Parents WD
- Hybrids WW
- Hybrids WD

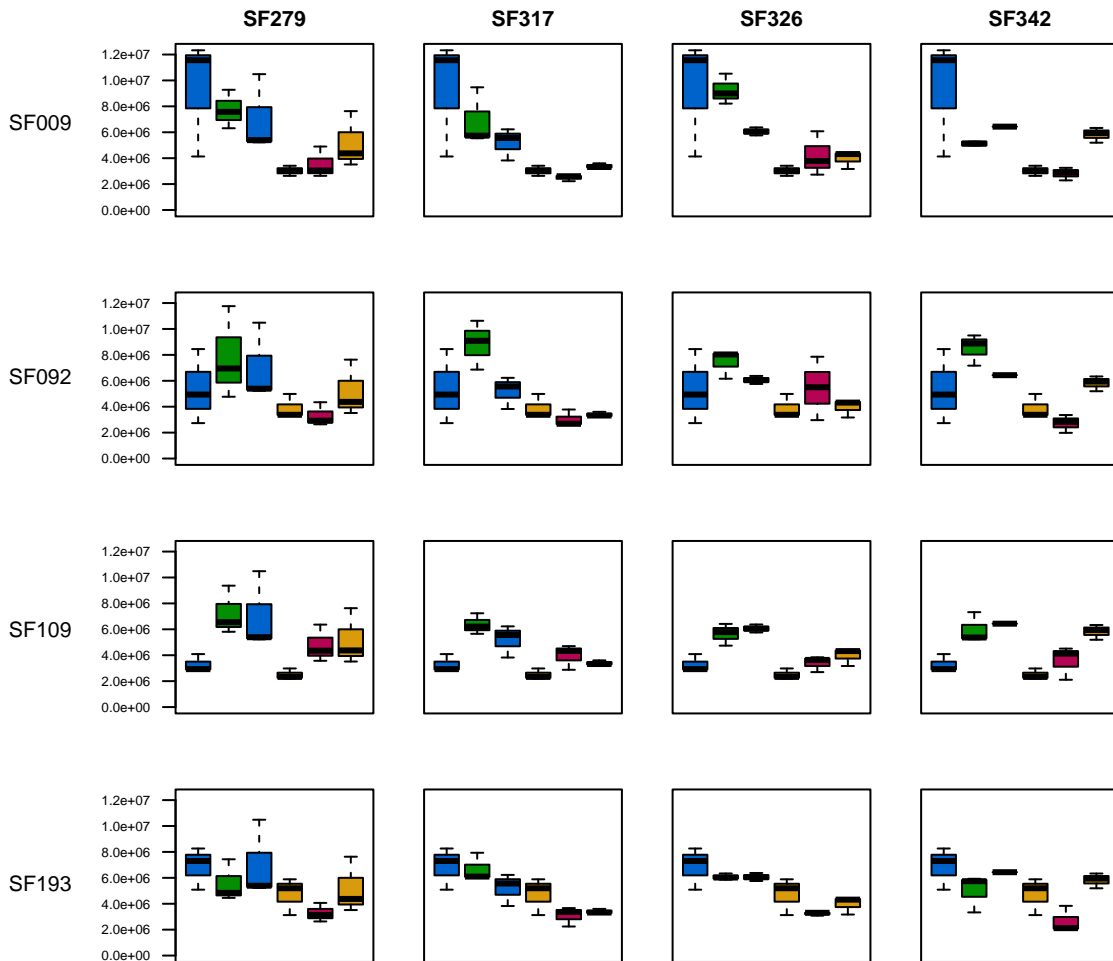

HanXRQChr17g0570601  
Probable cinnamyl alcohol dehydrogenase  
1

Parents WW  
Parents WD  
Hybrids WW  
Hybrids WD

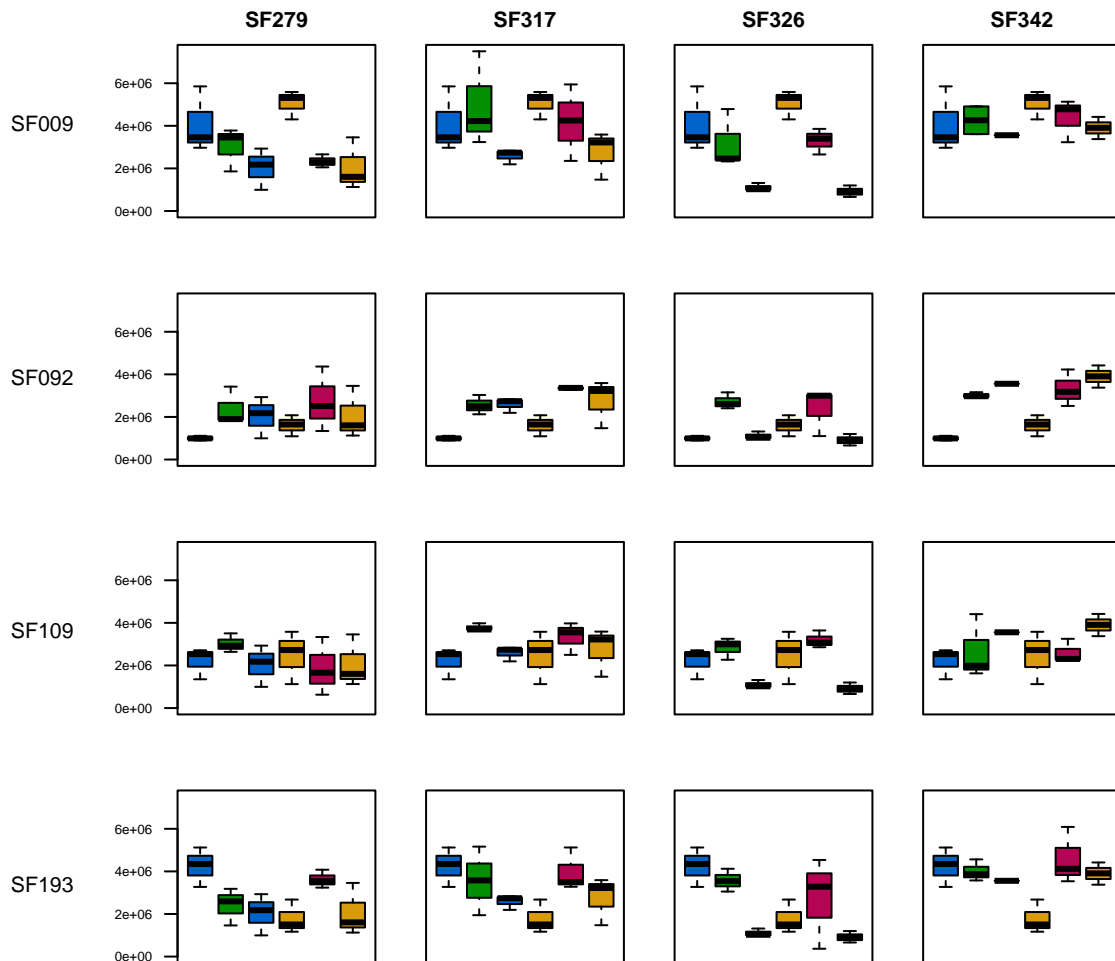

HanXRQChr09g0266151  
Probable carbonic anhydrase,  
chloroplastic

Parents WW  
Parents WD  
Hybrids WW  
Hybrids WD

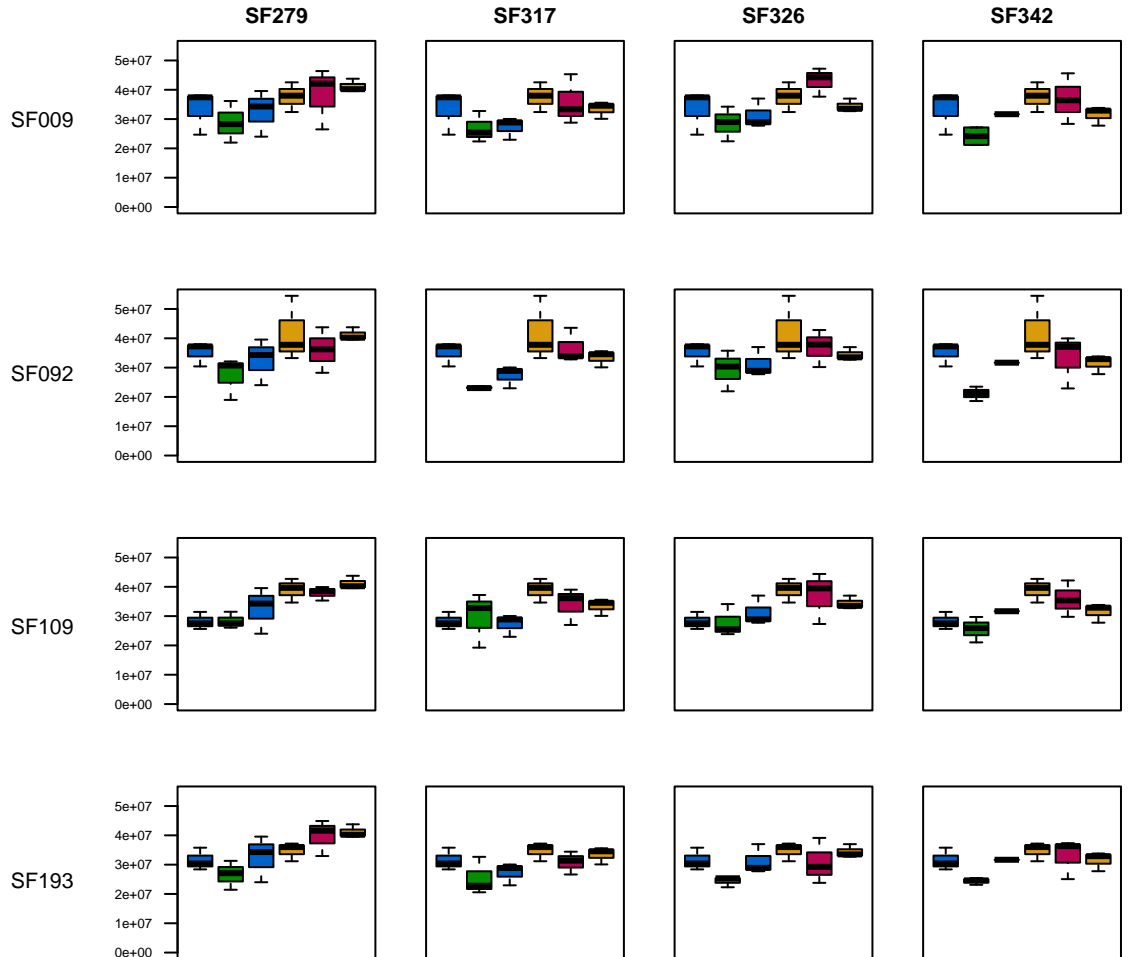

HanXRQChr16g0523951  
Putative ribulose biphosphate  
carboxylase small chain, domain; Ribulose-

Parents WW  
Parents WD  
Hybrids WW  
Hybrids WD

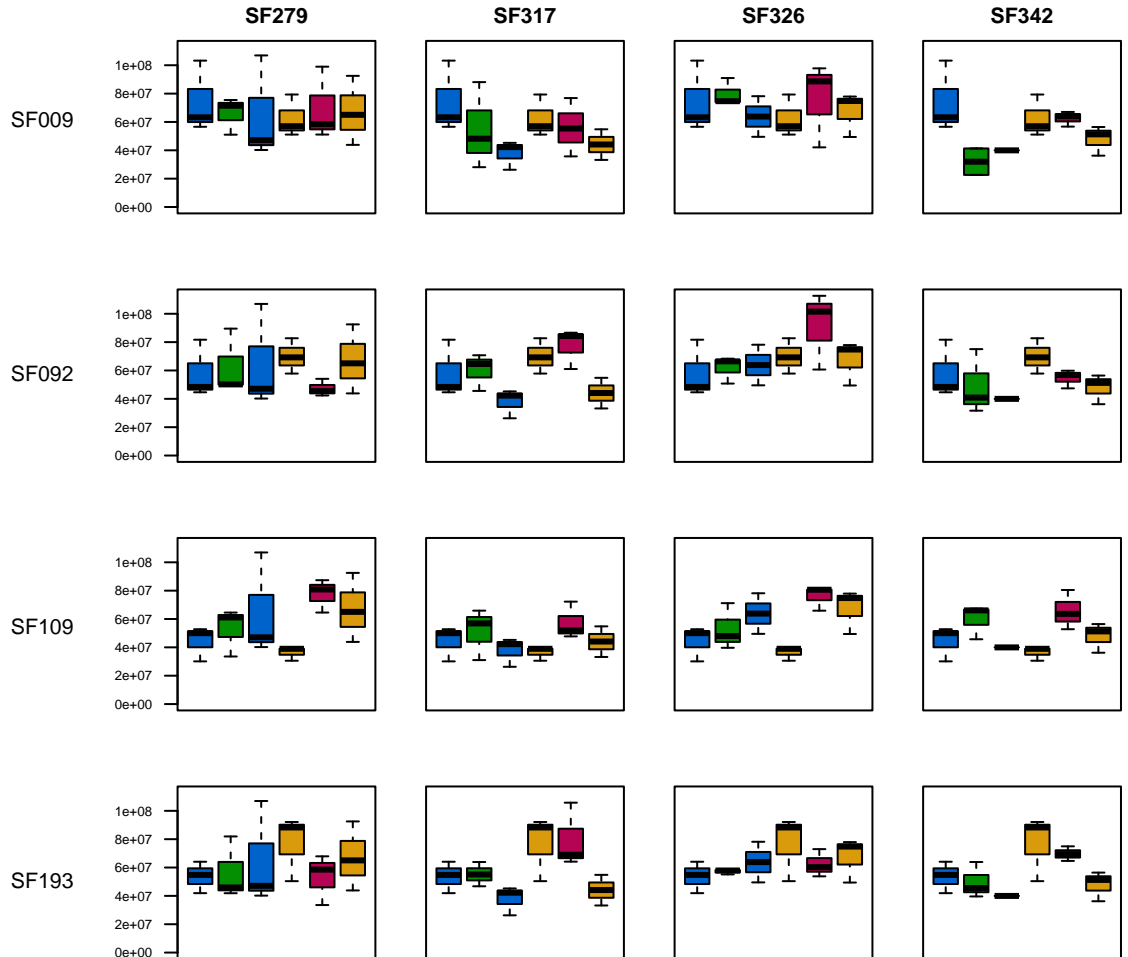

HanXRQChr15g0468471  
 Putative chaperonin Cpn60/TCP-1 family;  
 GroEL-like apical domain; GroEL-like equ

■ Parents WW  
 ■ Parents WD  
 ■ Hybrids WW  
 ■ Hybrids WD

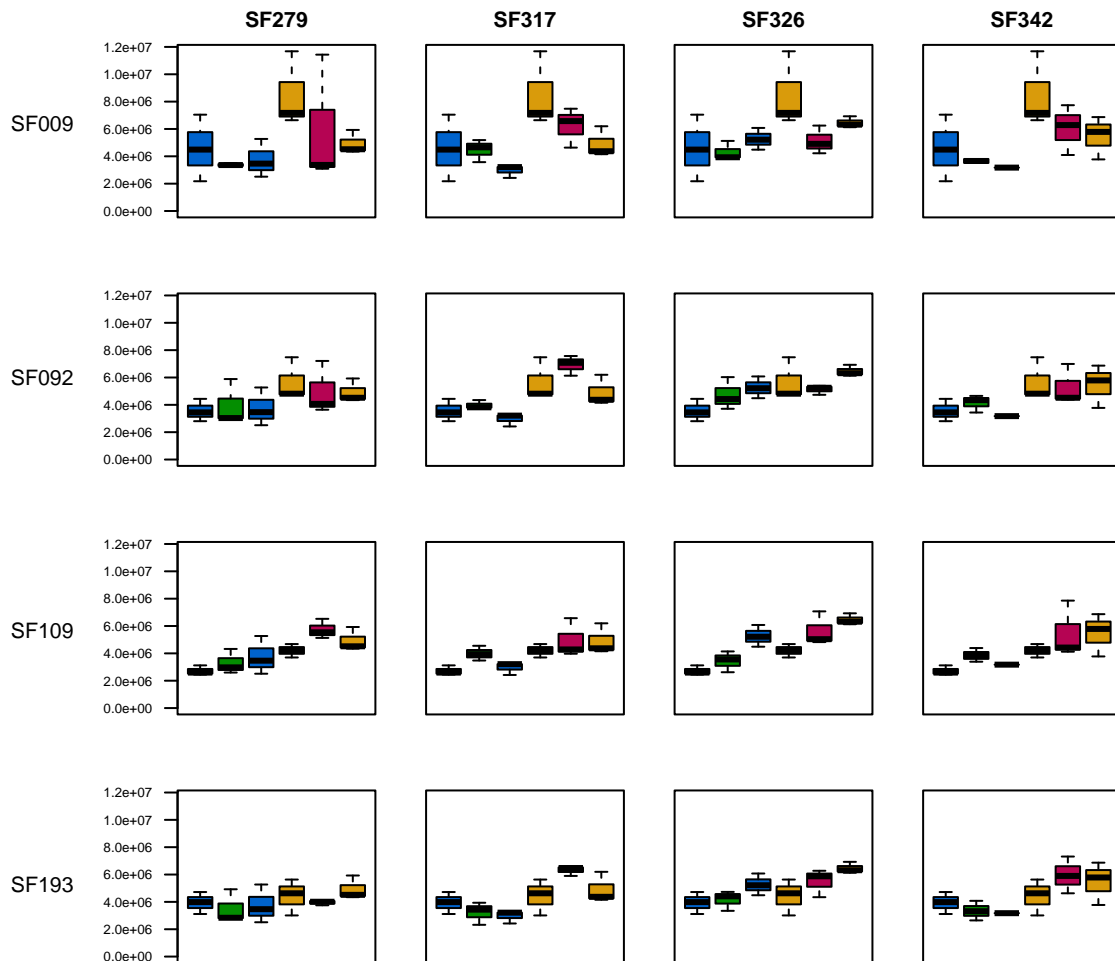

HanXRQChr01g0010391  
Probable thioredoxin family protein

Parents WW  
Parents WD  
Hybrids WW  
Hybrids WD

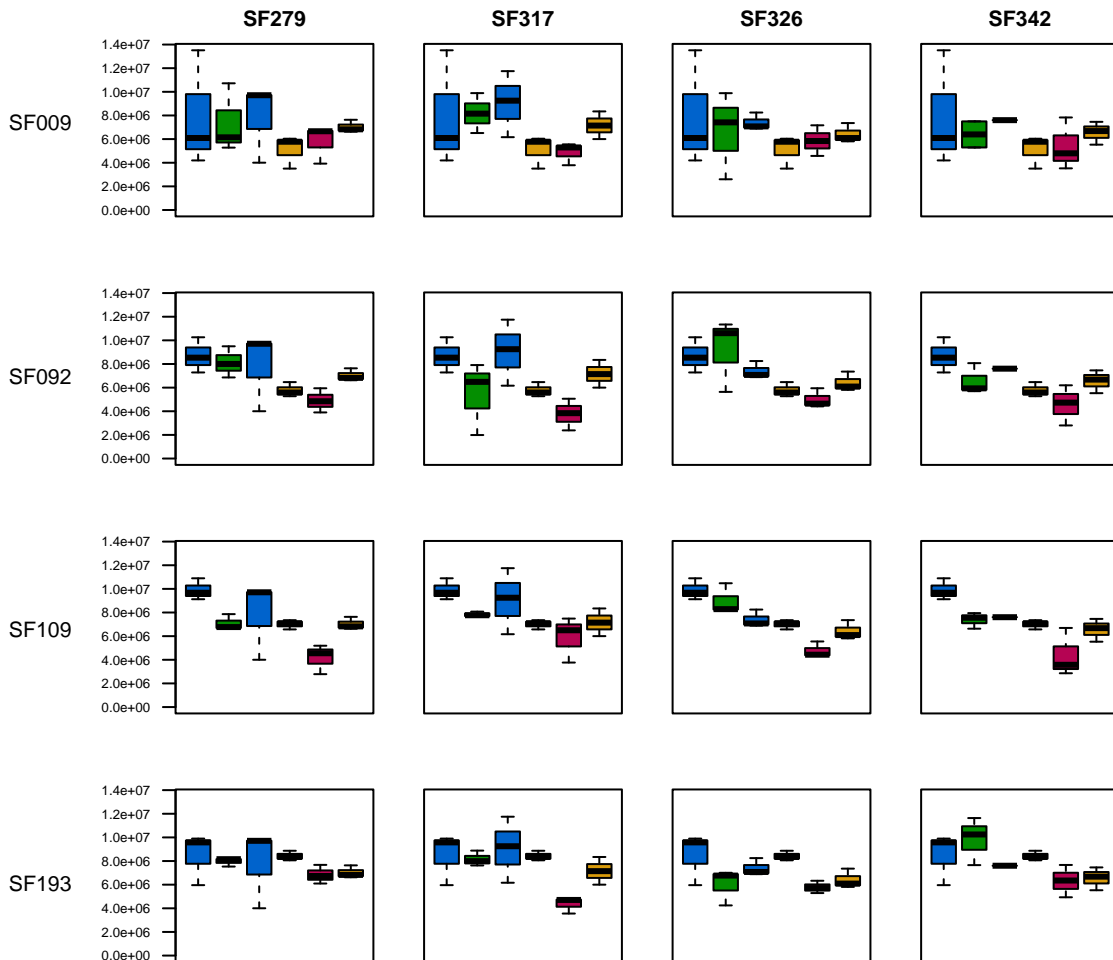



HanXRQChr01g0011451  
Probable plasma membrane intrinsic  
protein 2;5

Parents WW  
Parents WD  
Hybrids WW  
Hybrids WD

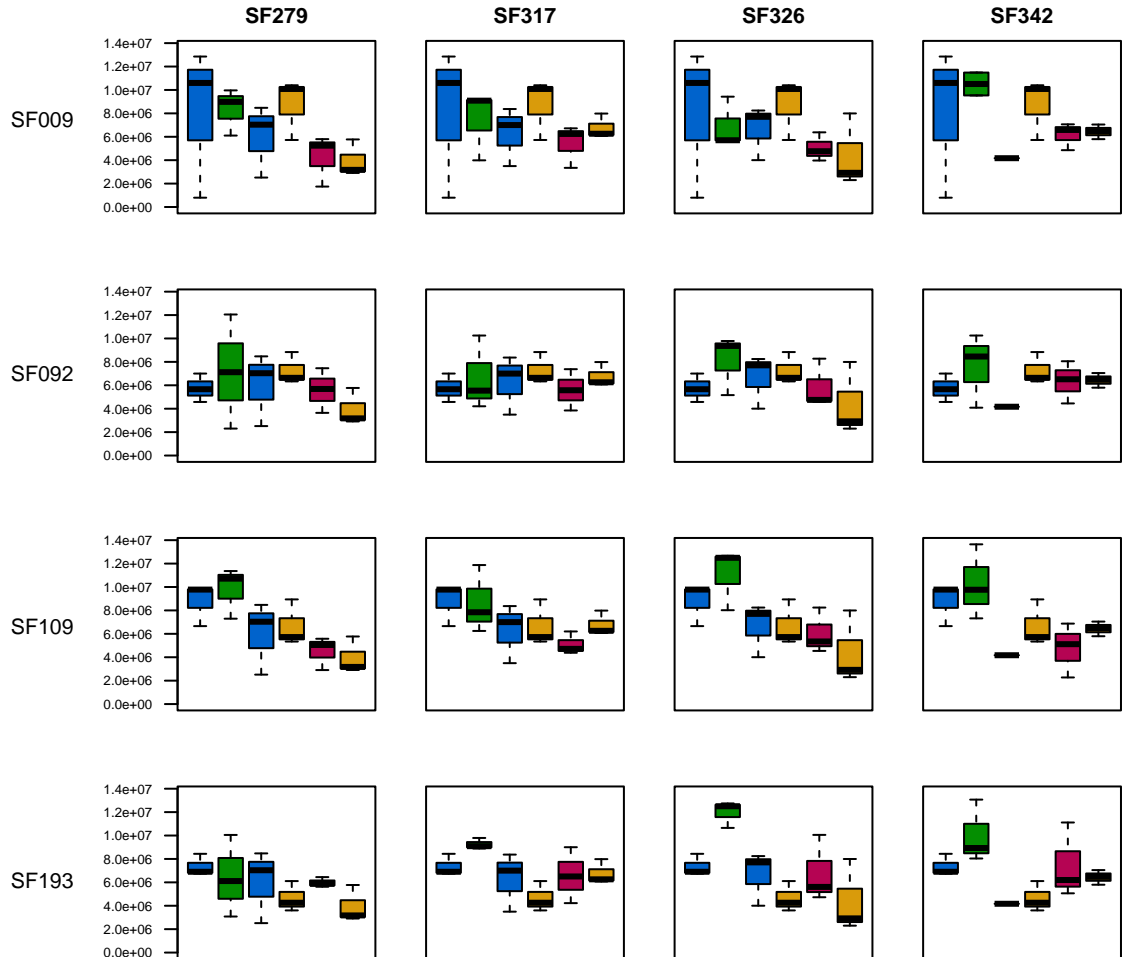

HanXRQChr09g0257711  
 Probable plasma-membrane associated  
 cation-binding protein 1

Parents WW  
 Parents WD  
 Hybrids WW  
 Hybrids WD

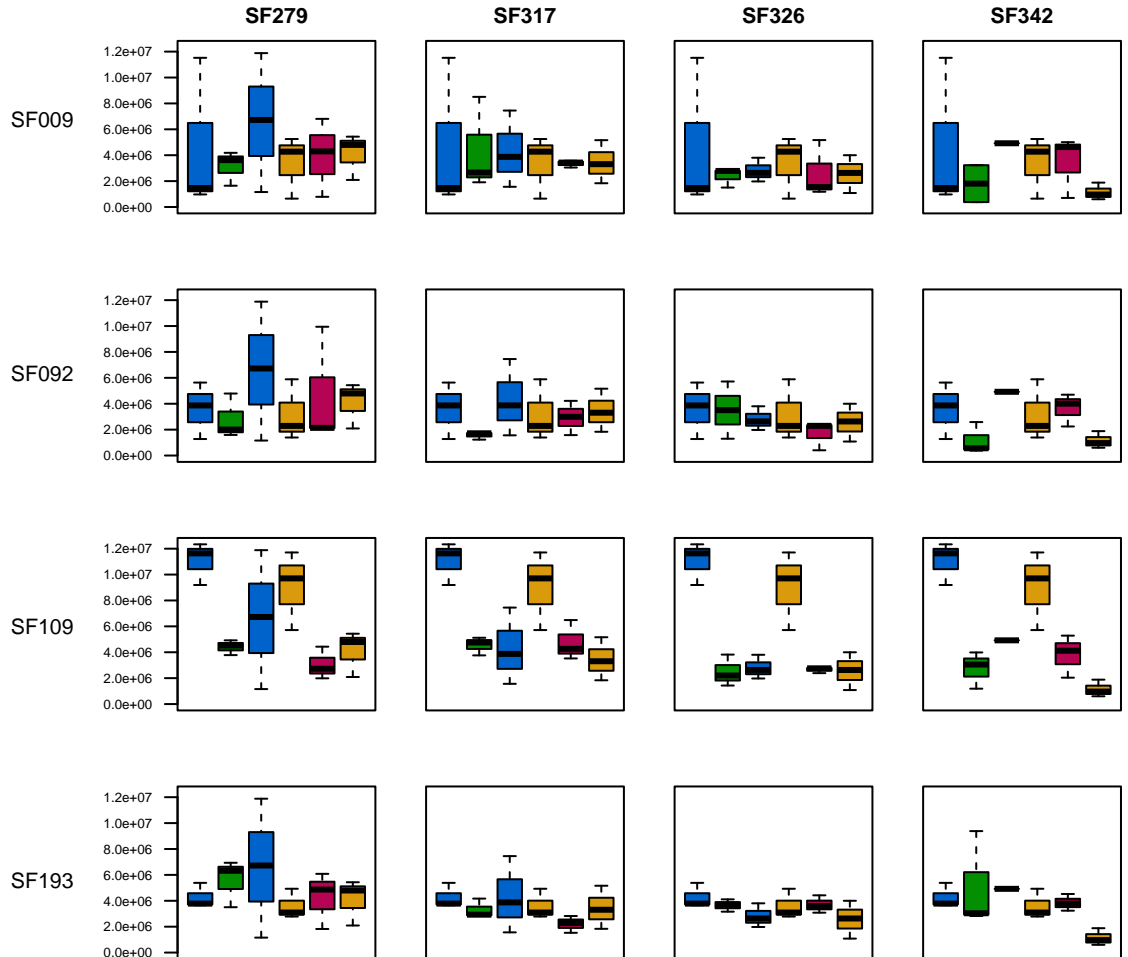

HanXRQChr17g0559761  
Probable aldolase superfamily protein

Parents WW  
Parents WD  
Hybrids WW  
Hybrids WD

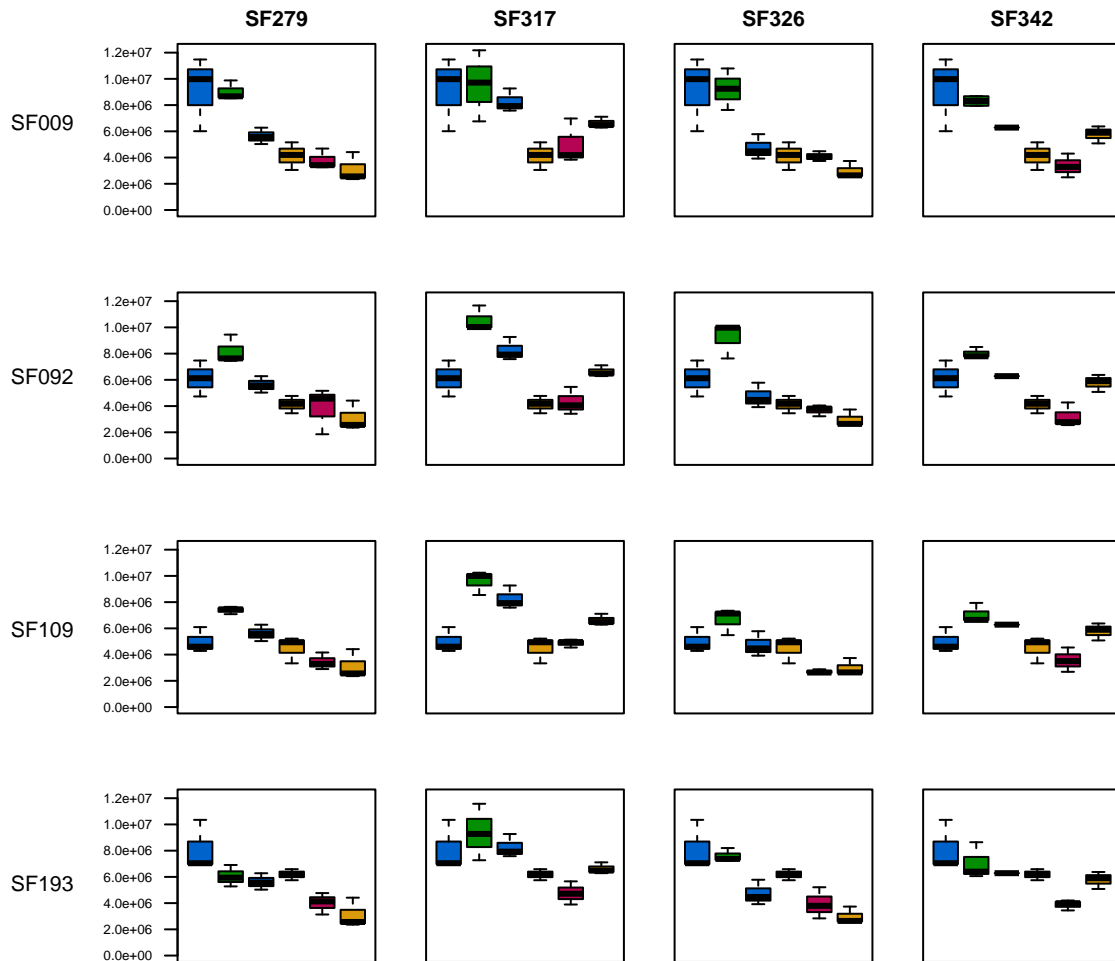

HanXRQChr14g0433821  
Probable FKBP-like peptidyl-prolyl  
cis-trans isomerase family protein

Parents WW  
Parents WD  
Hybrids WW  
Hybrids WD

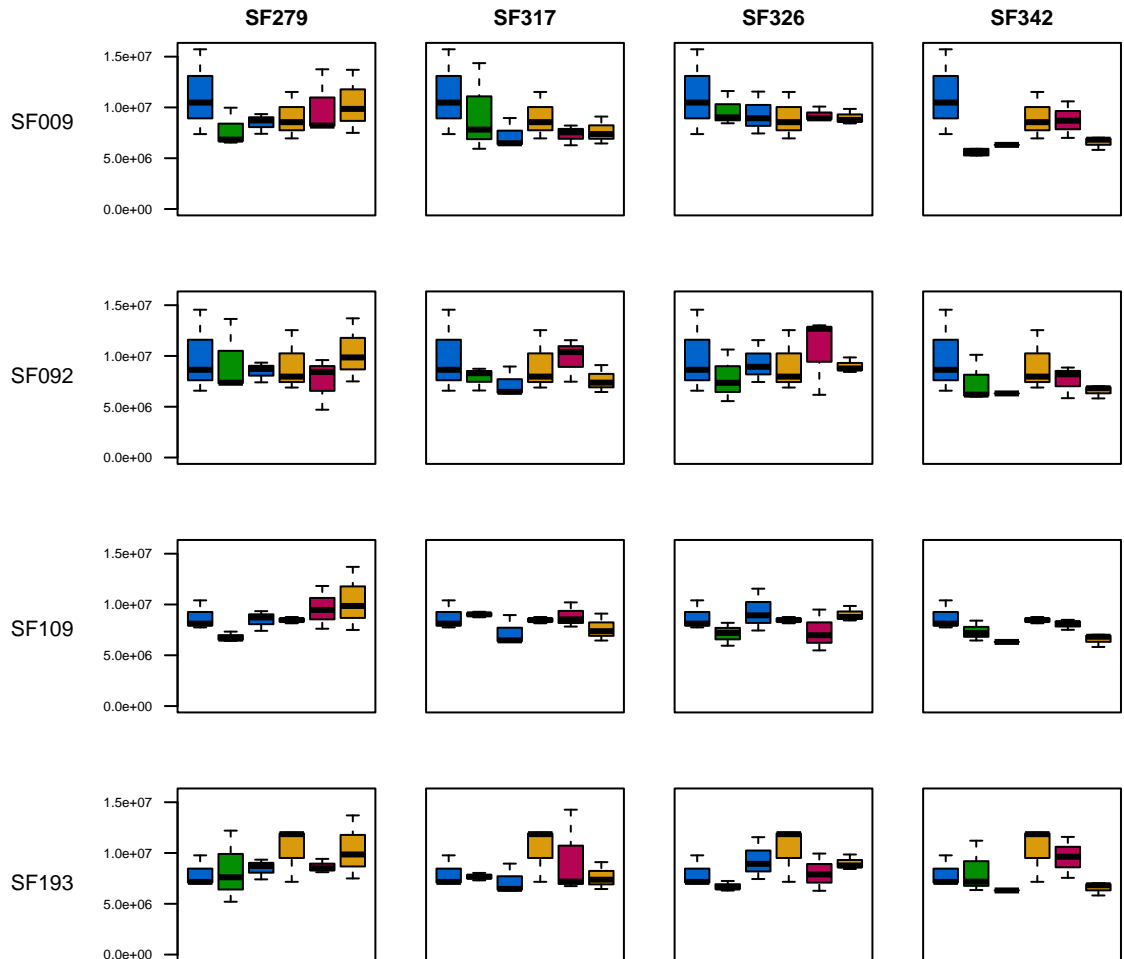

HanXRQChr03g0082611  
Probable phospholipid hydroperoxide  
glutathione peroxidase, chloroplastic

Parents WW  
Parents WD  
Hybrids WW  
Hybrids WD

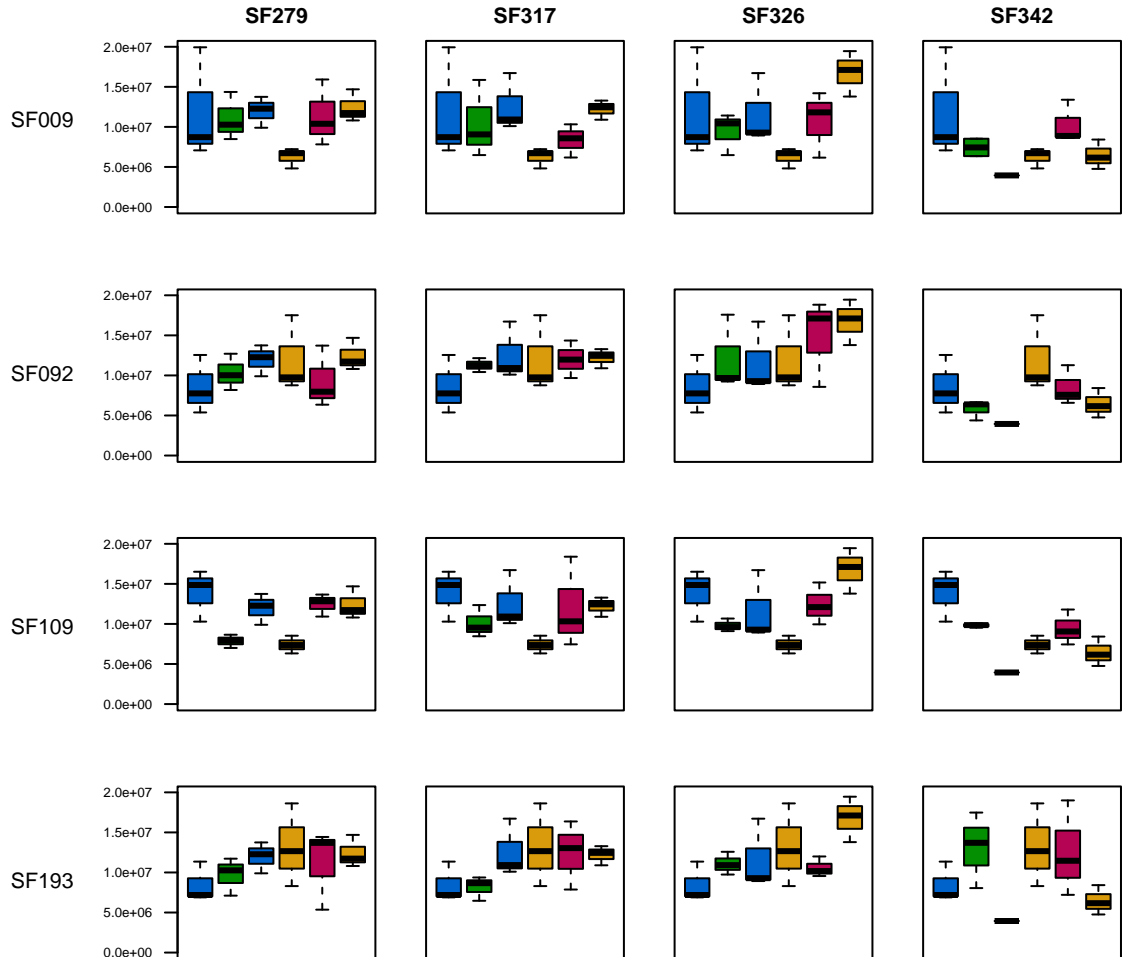

HanXRQChr04g0120771  
Probable methylenetetrahydrofolate  
reductase 1

Parents WW  
Parents WD  
Hybrids WW  
Hybrids WD

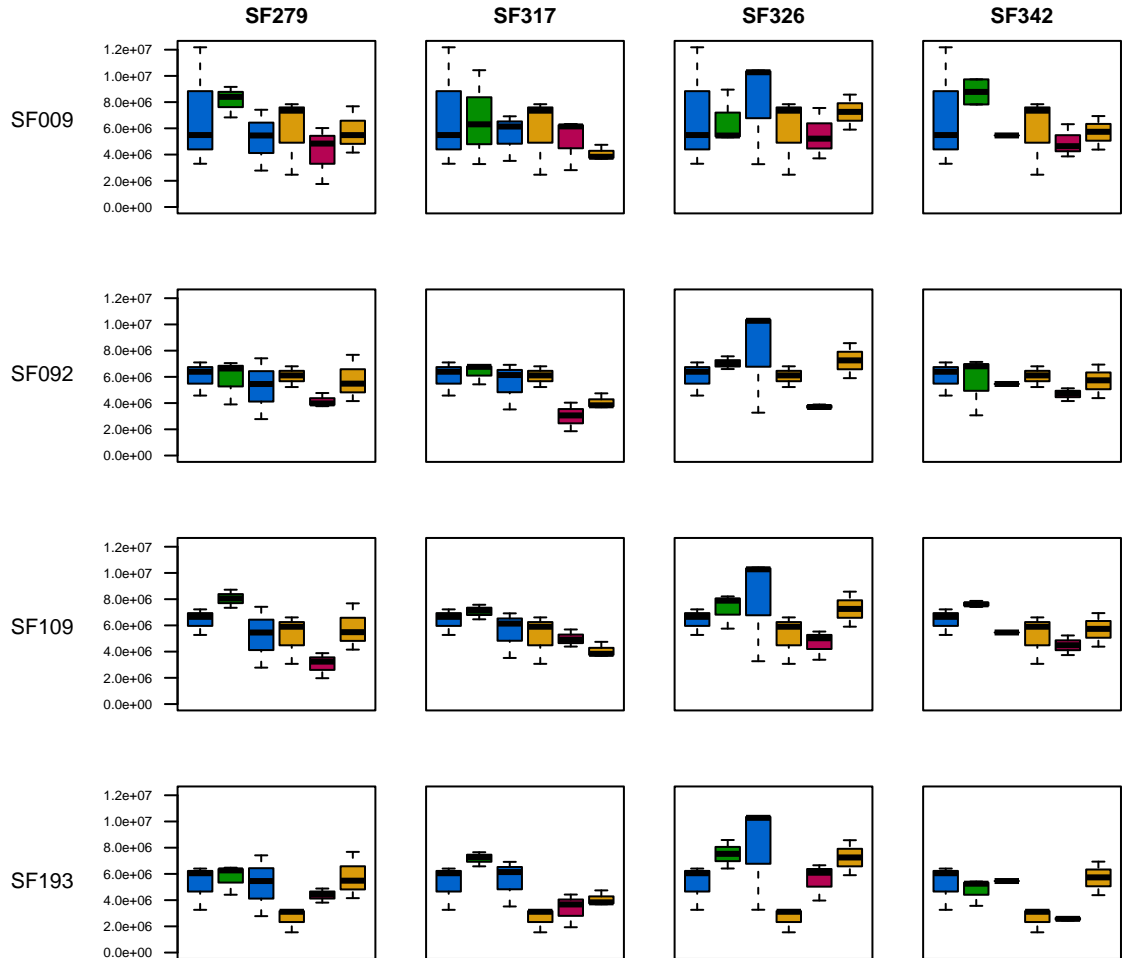

HanXRQChr09g0277111  
 Probable oligouridylate binding protein  
 1B

Parents WW  
 Parents WD  
 Hybrids WW  
 Hybrids WD

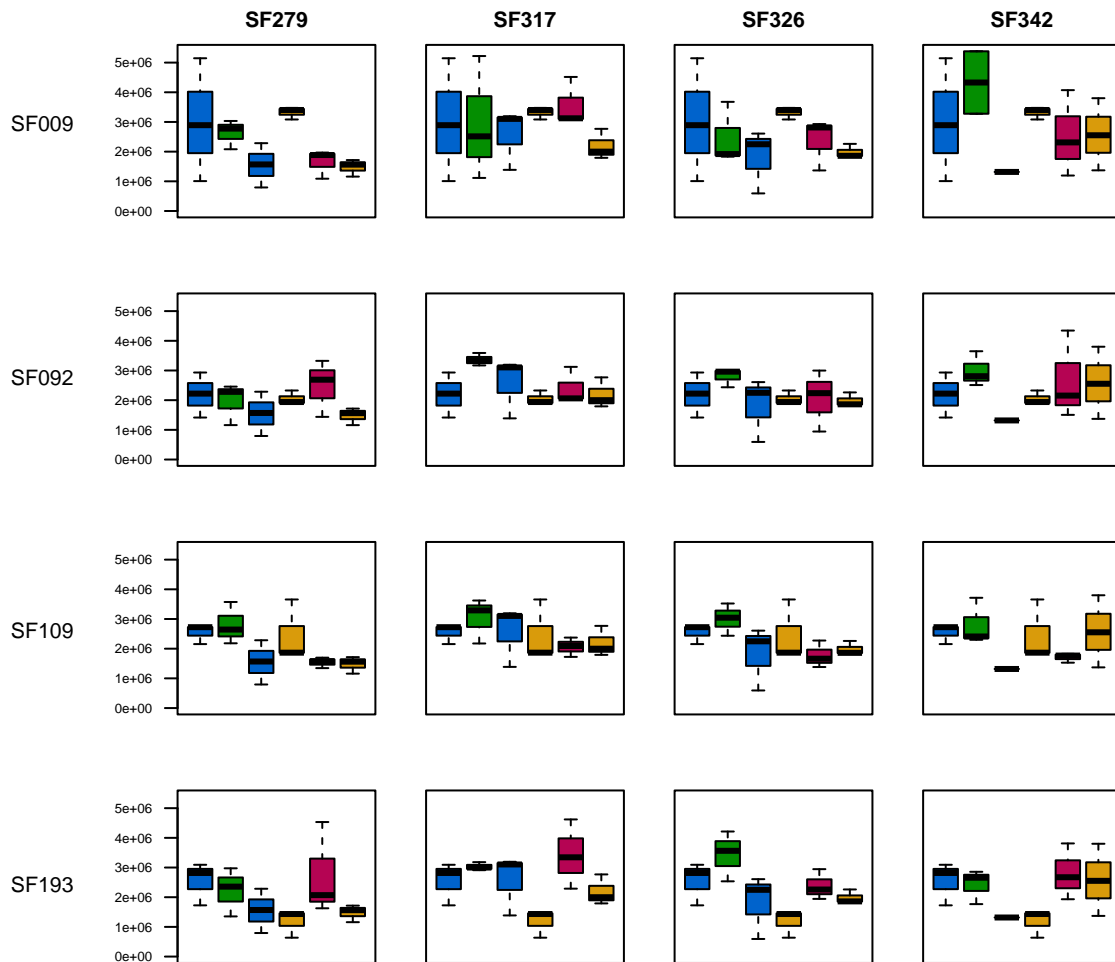

HanXRQChr09g0273511  
 Probable glutamate-1-semialdehyde  
 2,1-aminomutase, chloroplastic

■ Parents WW  
 ■ Parents WD  
 ■ Hybrids WW  
 ■ Hybrids WD

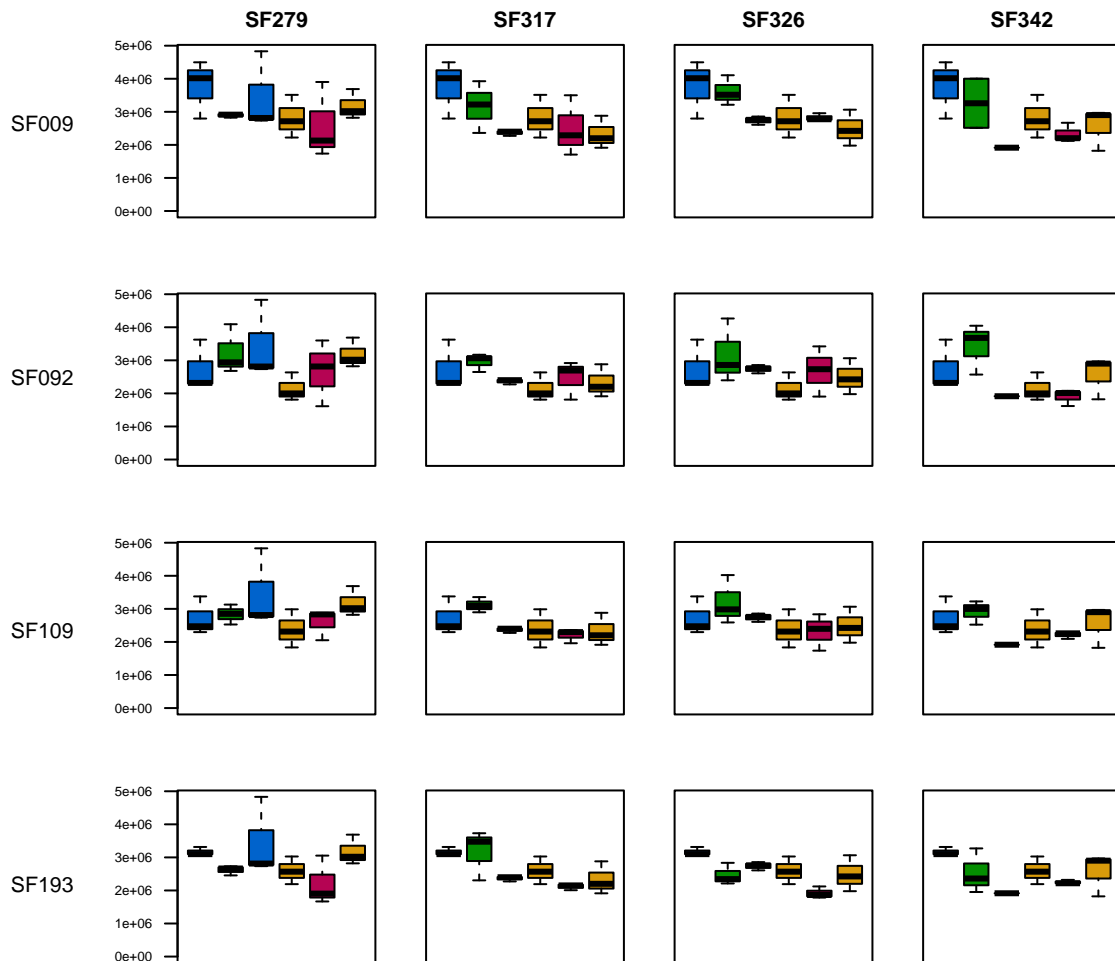



HanXRQChr09g0248241  
Putative aspartic peptidase A1 family;  
Aspartic peptidase domain; Xylanase inhibi

Parents WW  
Parents WD  
Hybrids WW  
Hybrids WD

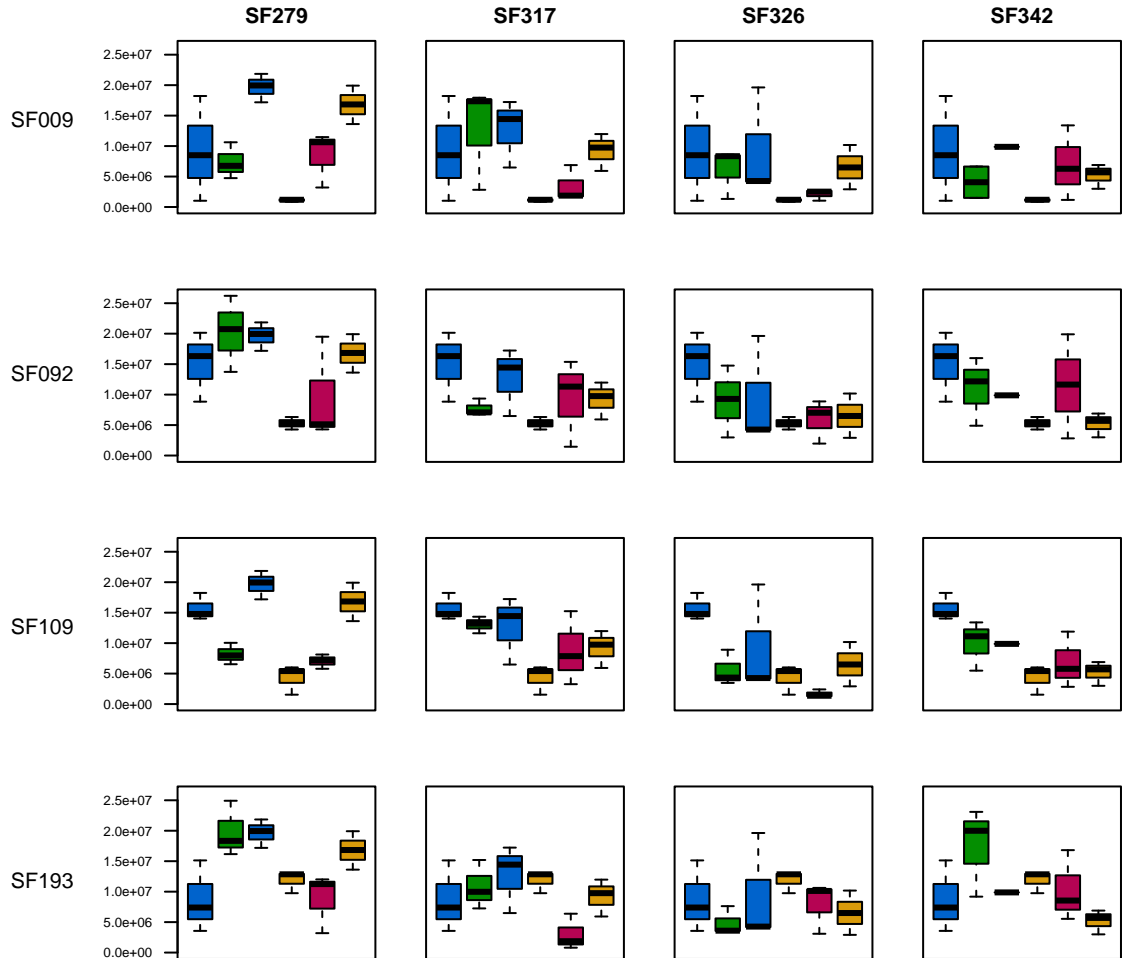

HanXRQChr10g0313771  
Probable leucine aminopeptidase 2,  
chloroplastic EC=3.4.11.5

Parents WW  
Parents WD  
Hybrids WW  
Hybrids WD

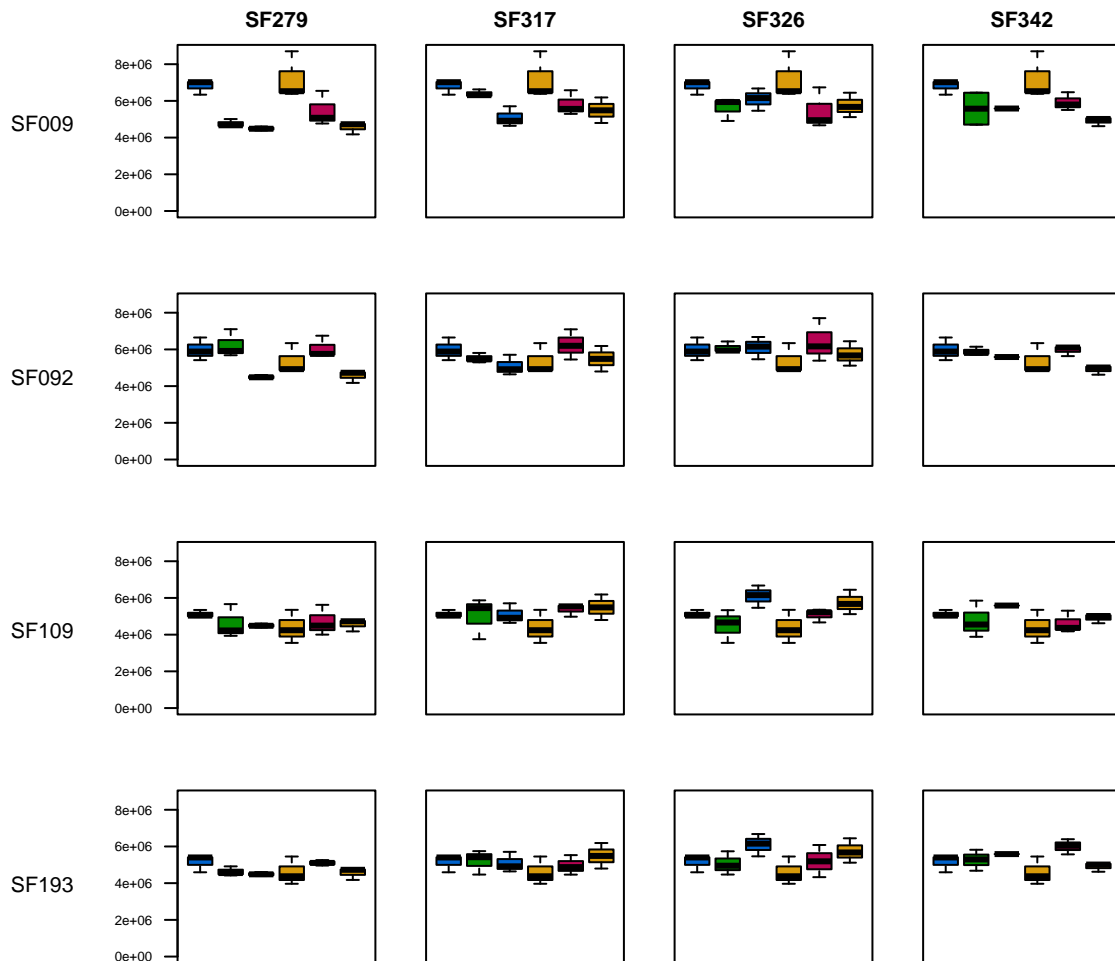

HanXRQChr10g0304491  
 Probable rubredoxin-like superfamily  
 protein

Parents WW  
 Parents WD  
 Hybrids WW  
 Hybrids WD

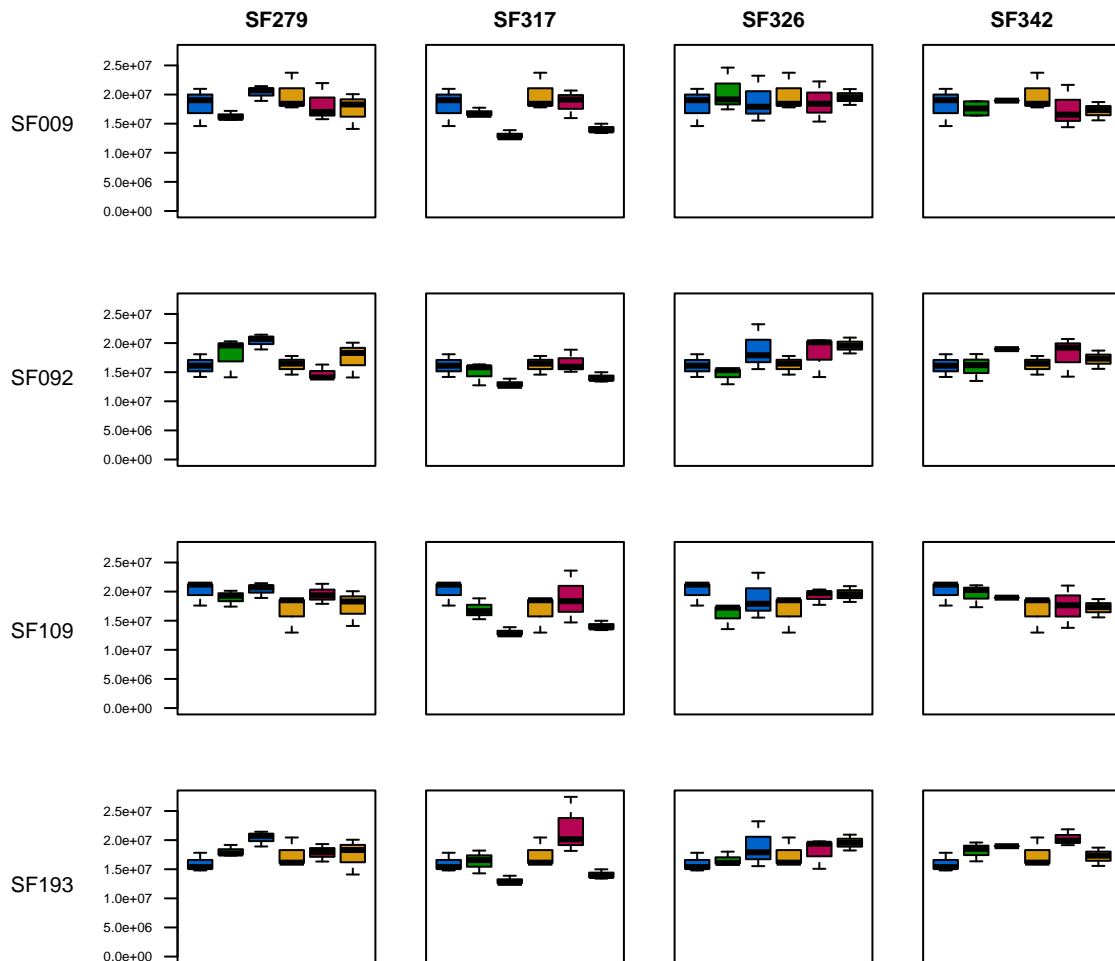

HanXRQChr08g0232441  
Probable 20S proteasome beta subunit G1

Parents WW  
Parents WD  
Hybrids WW  
Hybrids WD

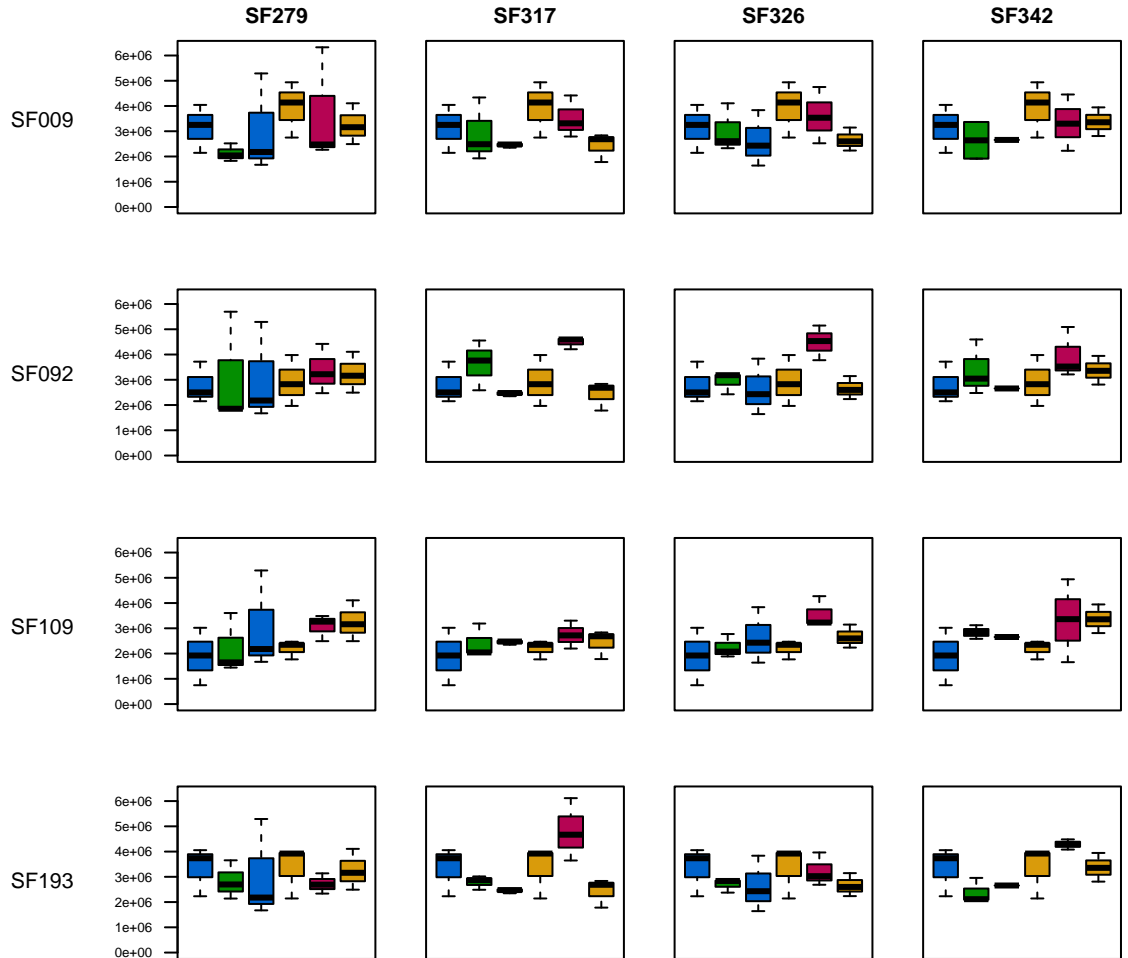

HanXRQChr10g0316701  
Probable SOUL heme-binding family  
protein

Parents WW  
Parents WD  
Hybrids WW  
Hybrids WD

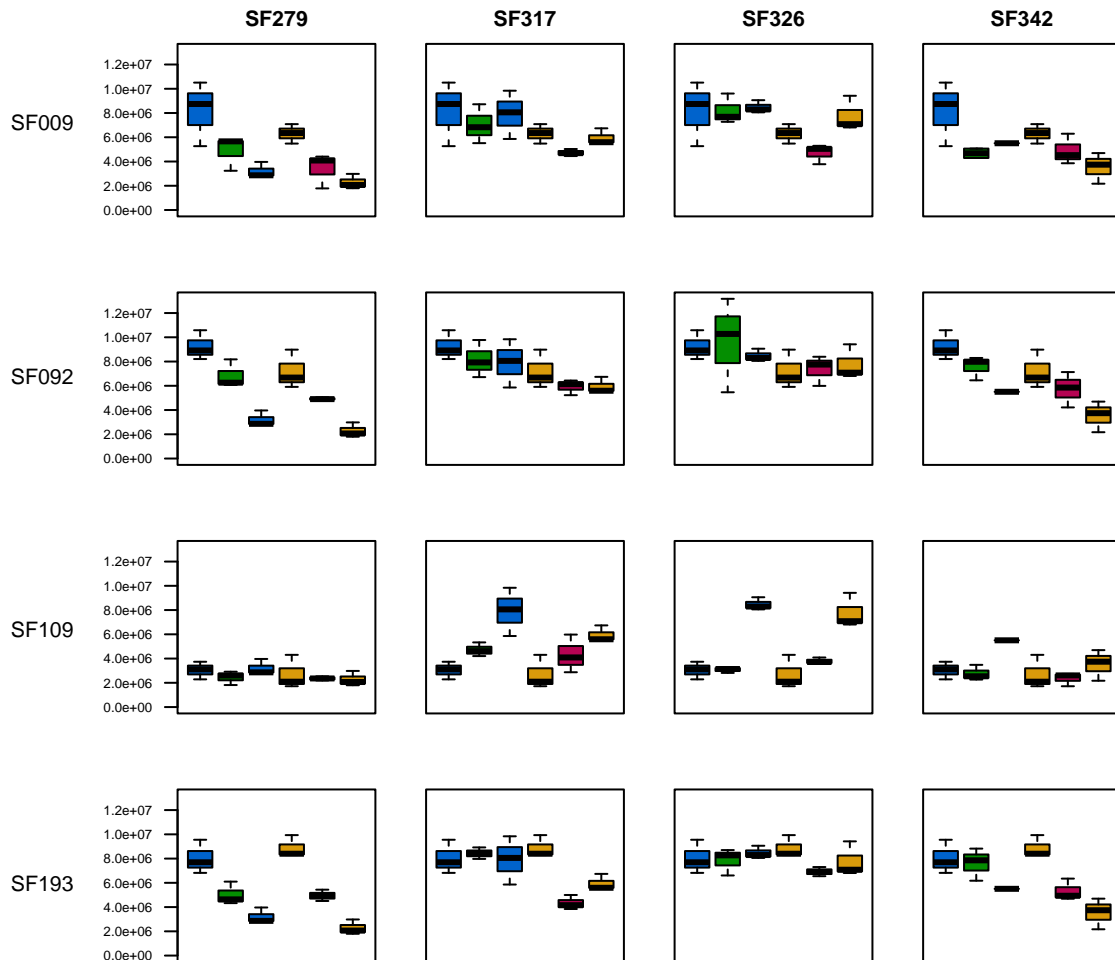

HanXRQChr14g0433051  
Probable NAD(P)-binding Rossmann-fold  
superfamily protein

Parents WW  
Parents WD  
Hybrids WW  
Hybrids WD

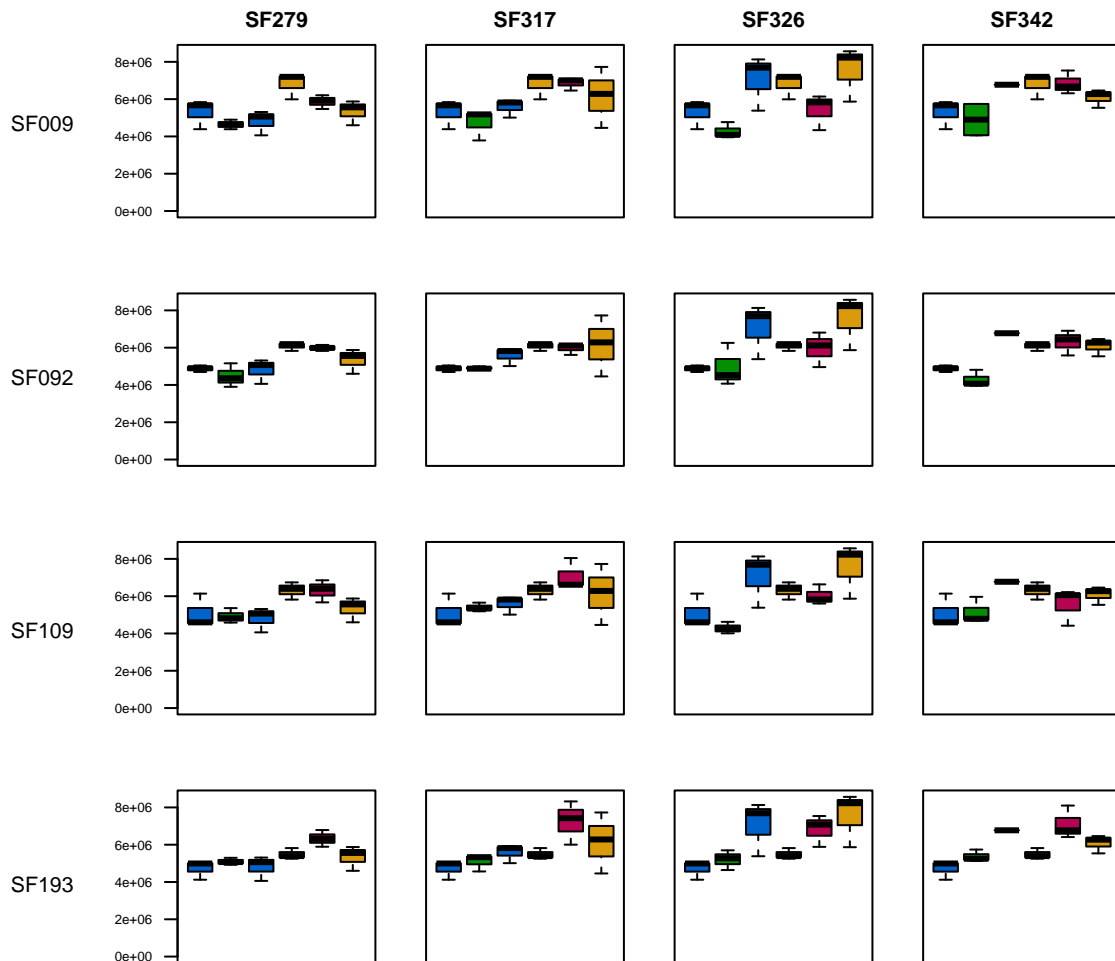

HanXRQChr07g0190661  
Putative succinate semialdehyde  
dehydrogenase; Aldehyde/histidinol dehydratase

Parents WW  
Parents WD  
Hybrids WW  
Hybrids WD

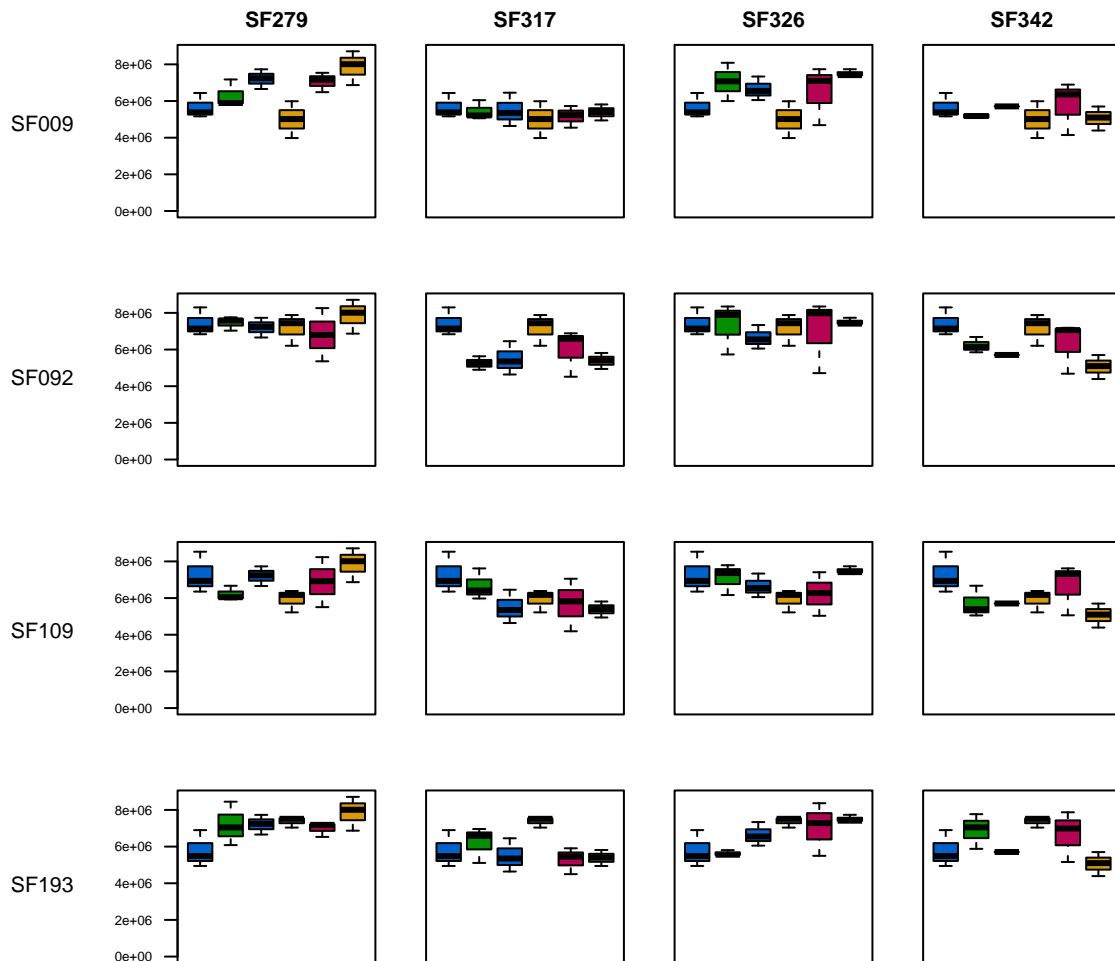

HanXRQChr05g0158481  
Putative groES chaperonin family

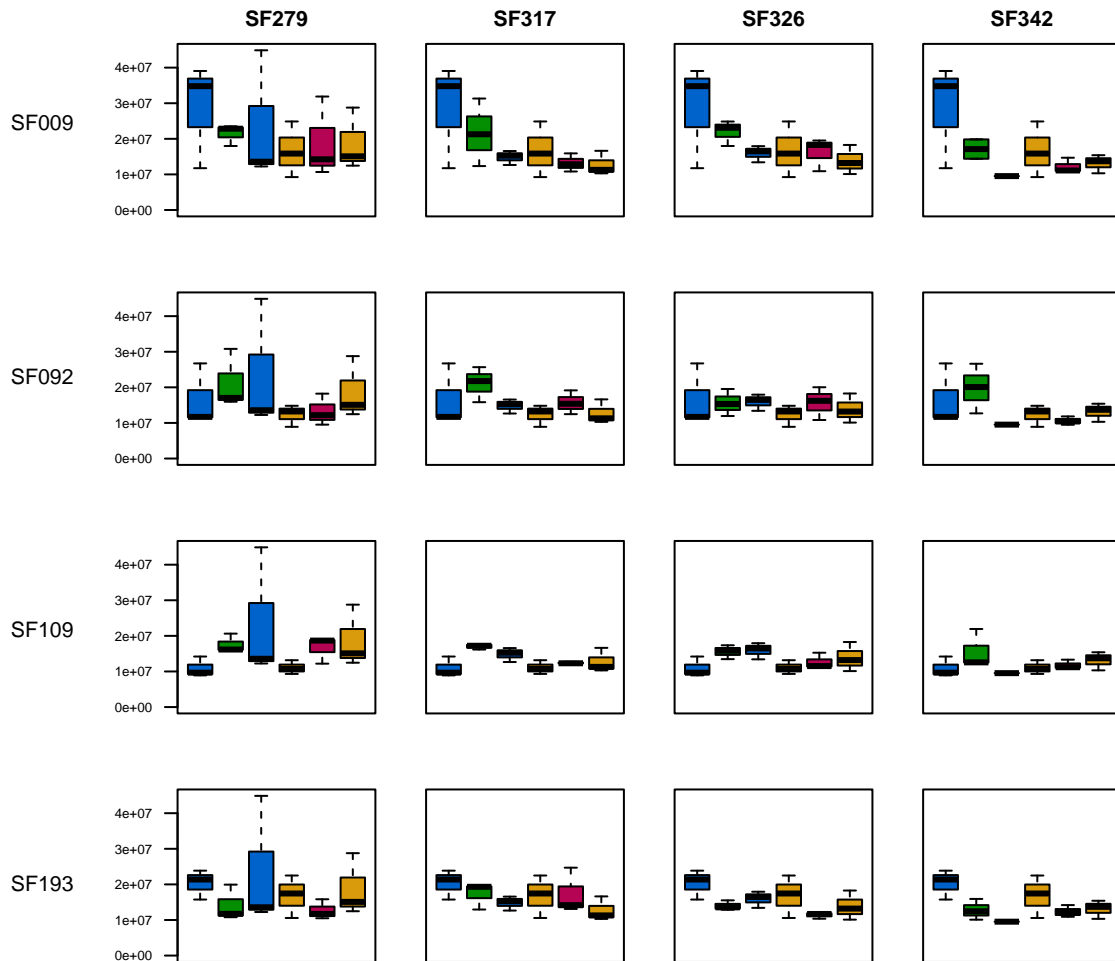



HanXRQChr02g0059581  
 Probable peroxisomal 3-ketoacyl-CoA  
 thiolase 3

Parents WW  
 Parents WD  
 Hybrids WW  
 Hybrids WD

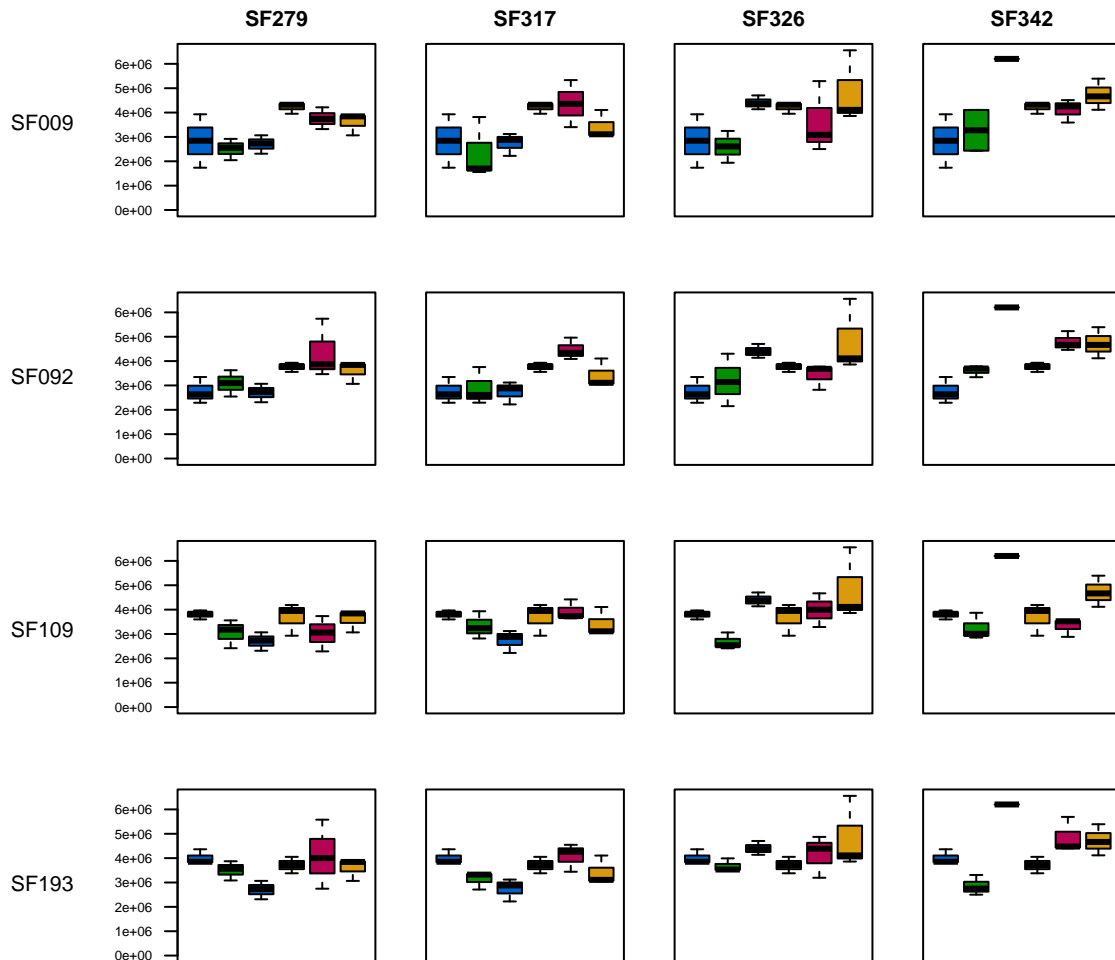

HanXRQChr08g0234071  
Probable electron transfer flavoprotein  
alpha

Parents WW  
Parents WD  
Hybrids WW  
Hybrids WD

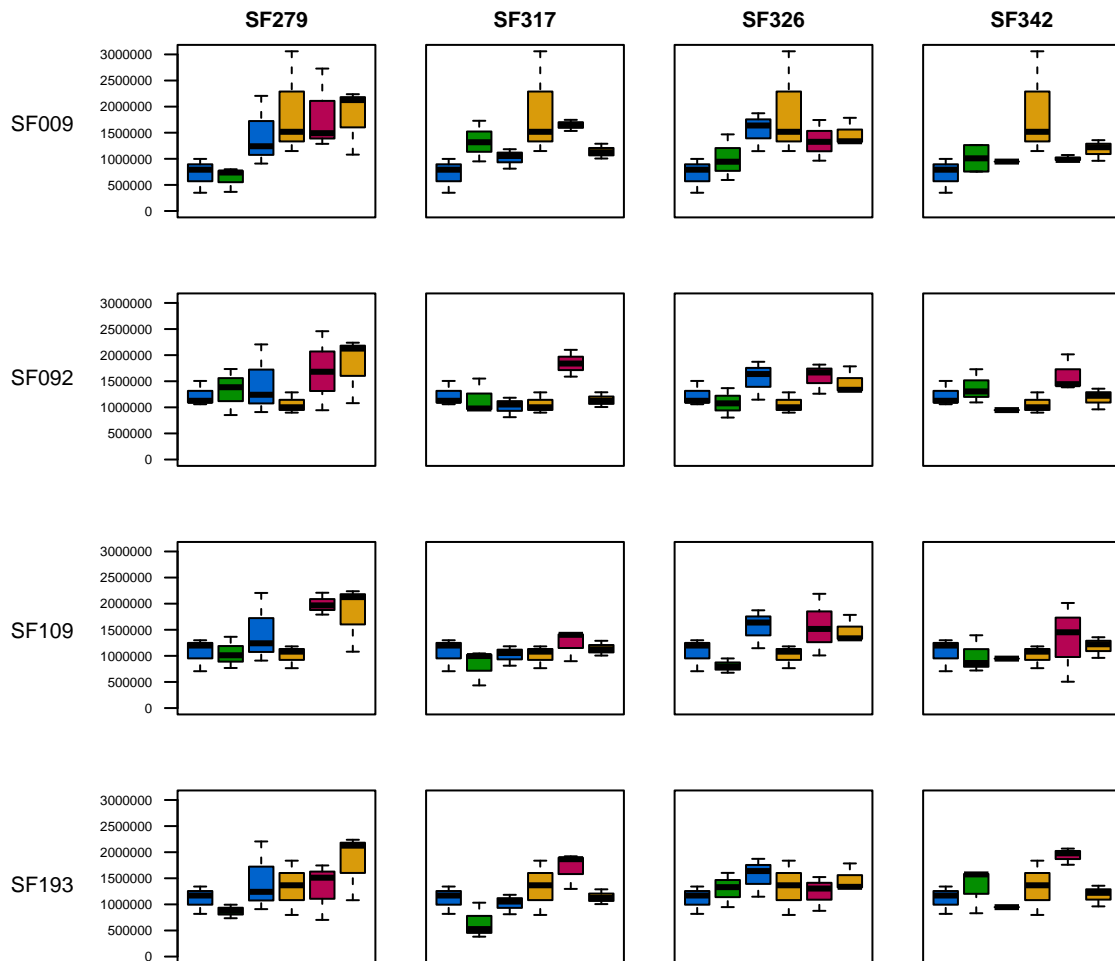

HanXRQChr11g0343901  
 Probable NAD(P)-binding Rossmann-fold  
 superfamily protein

Parents WW  
 Parents WD  
 Hybrids WW  
 Hybrids WD

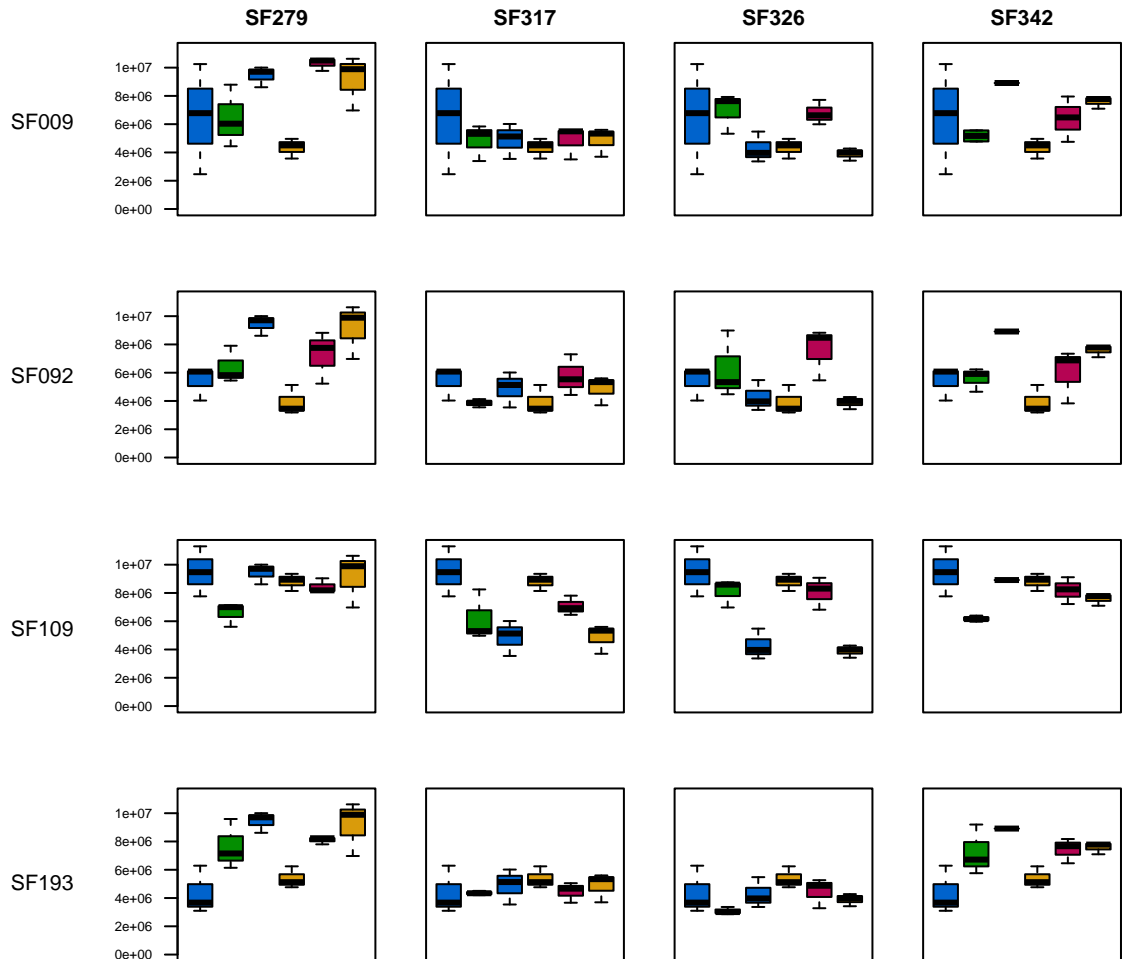

HanXRQChr17g0554521  
Probable tyrosine transaminase family  
protein

Parents WW  
Parents WD  
Hybrids WW  
Hybrids WD

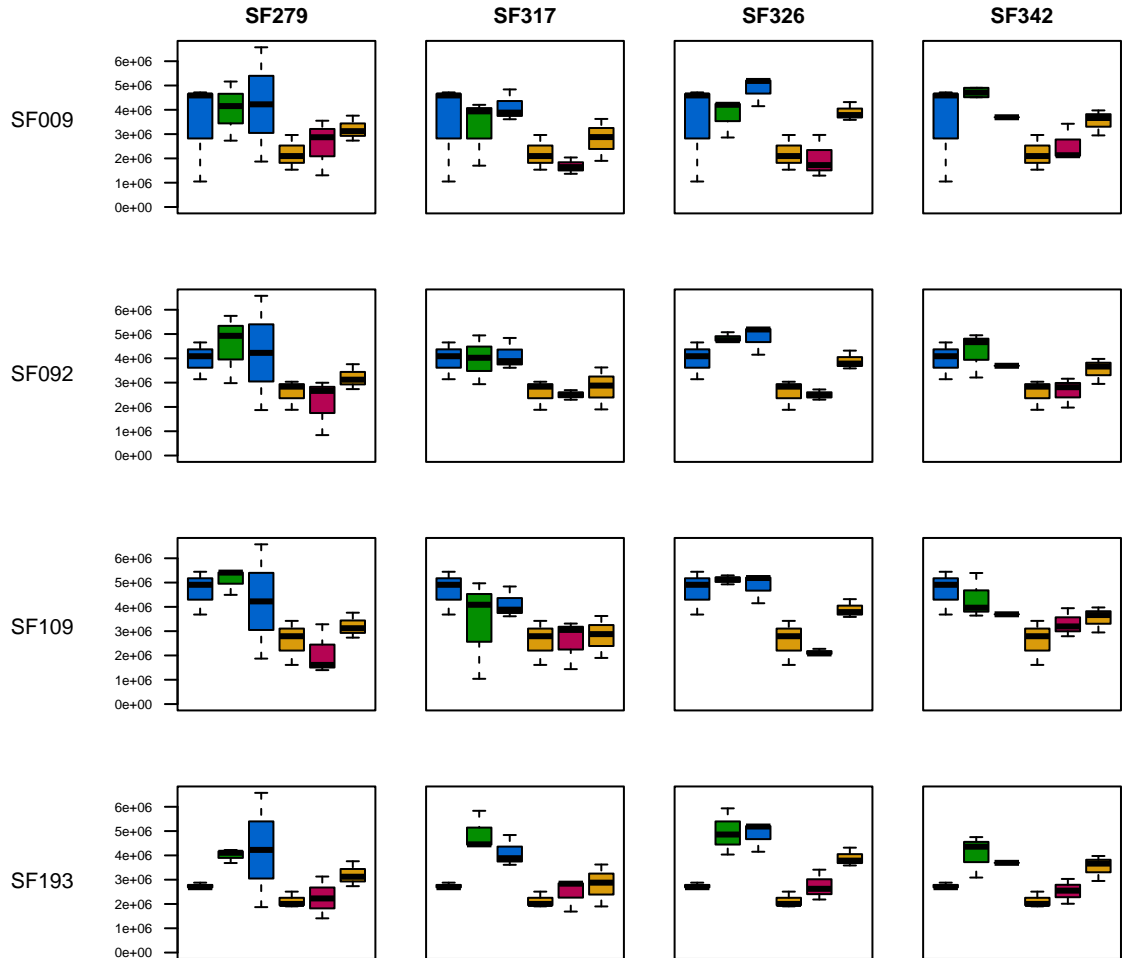

HanXRQChr11g0334271  
 Probable homolog of bacterial  
 cytokinesis Z-ring protein FTSZ 1-1

Parents WW  
 Parents WD  
 Hybrids WW  
 Hybrids WD

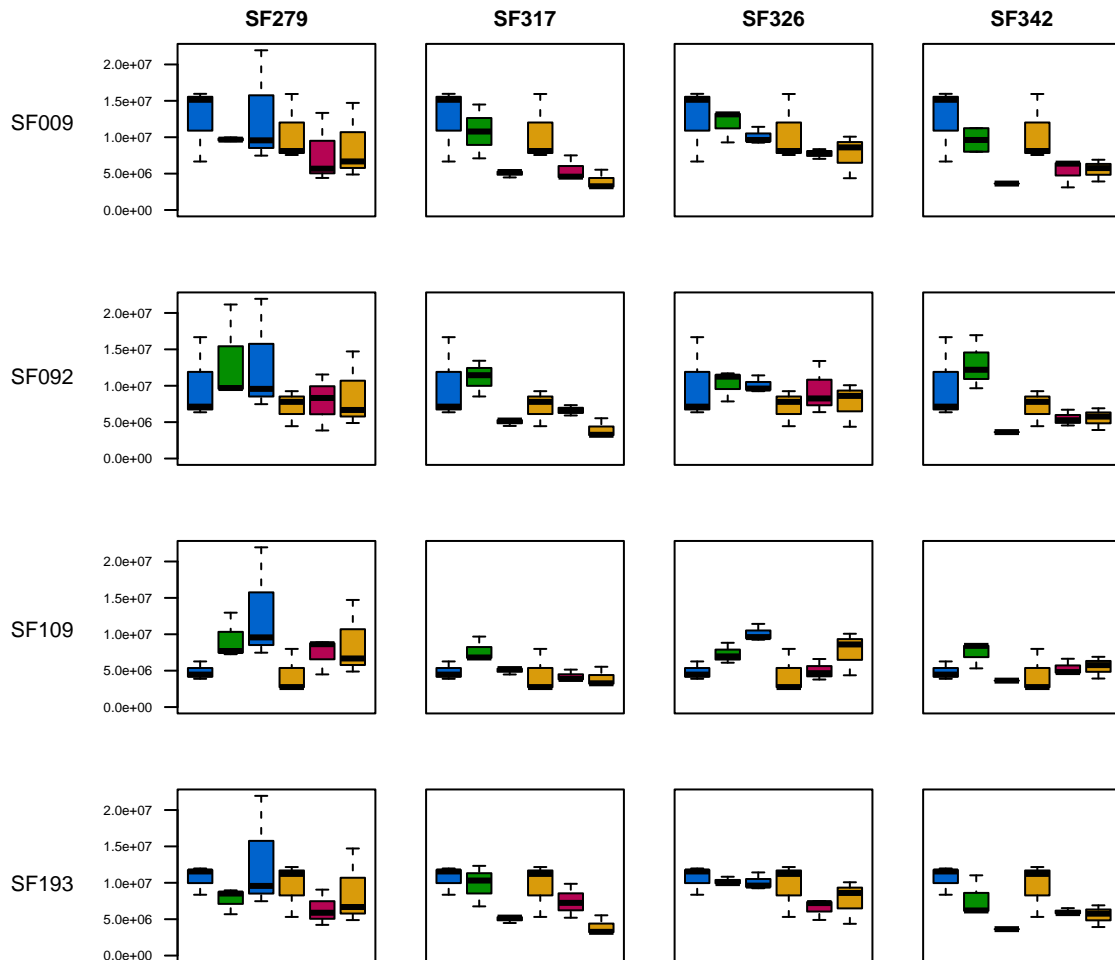

HanXRQChr11g0329011  
 Uncharacterized protein, conserved in  
 plant genome(s), supported by expression c

Parents WW  
 Parents WD  
 Hybrids WW  
 Hybrids WD

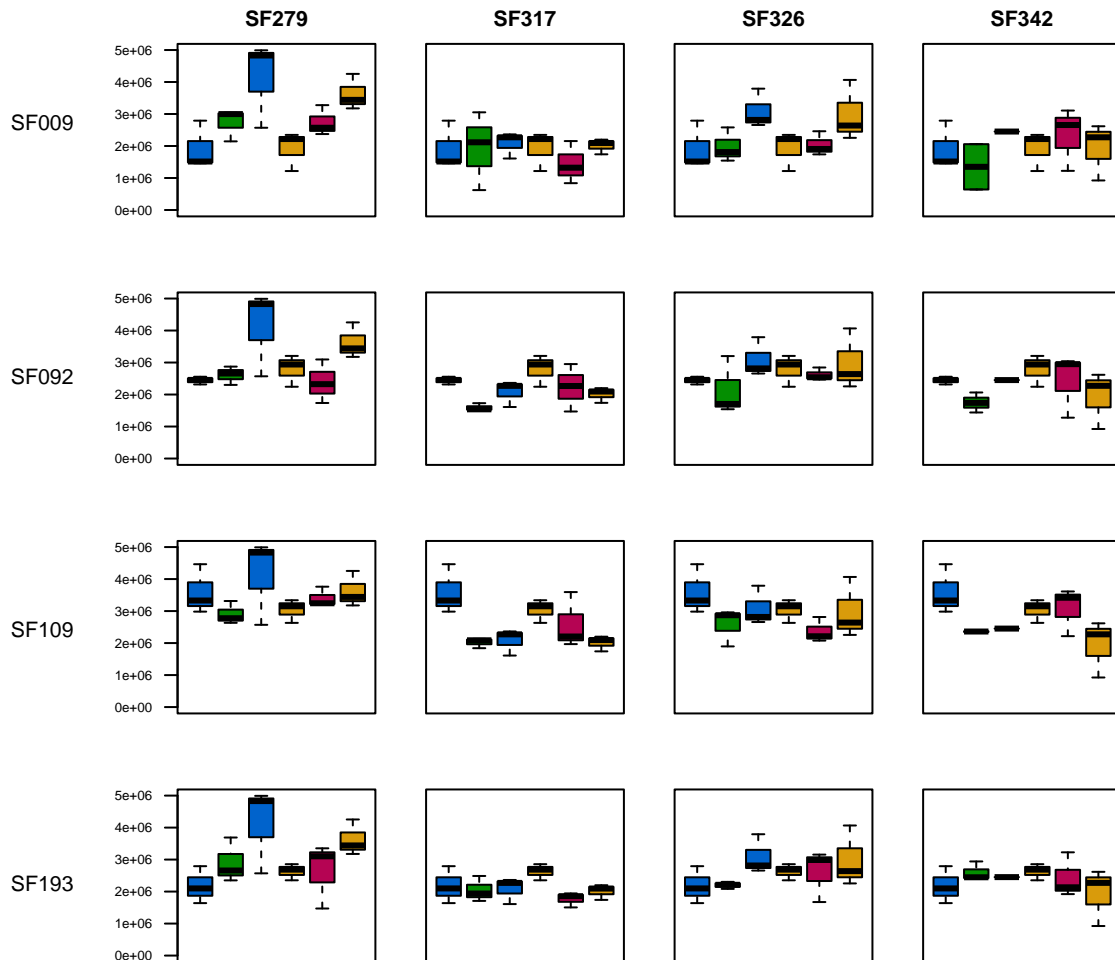

HanXRQChr04g0119781  
 Probable granule-bound starch synthase  
 1, chloroplastic/amyloplastic

Parents WW  
 Parents WD  
 Hybrids WW  
 Hybrids WD

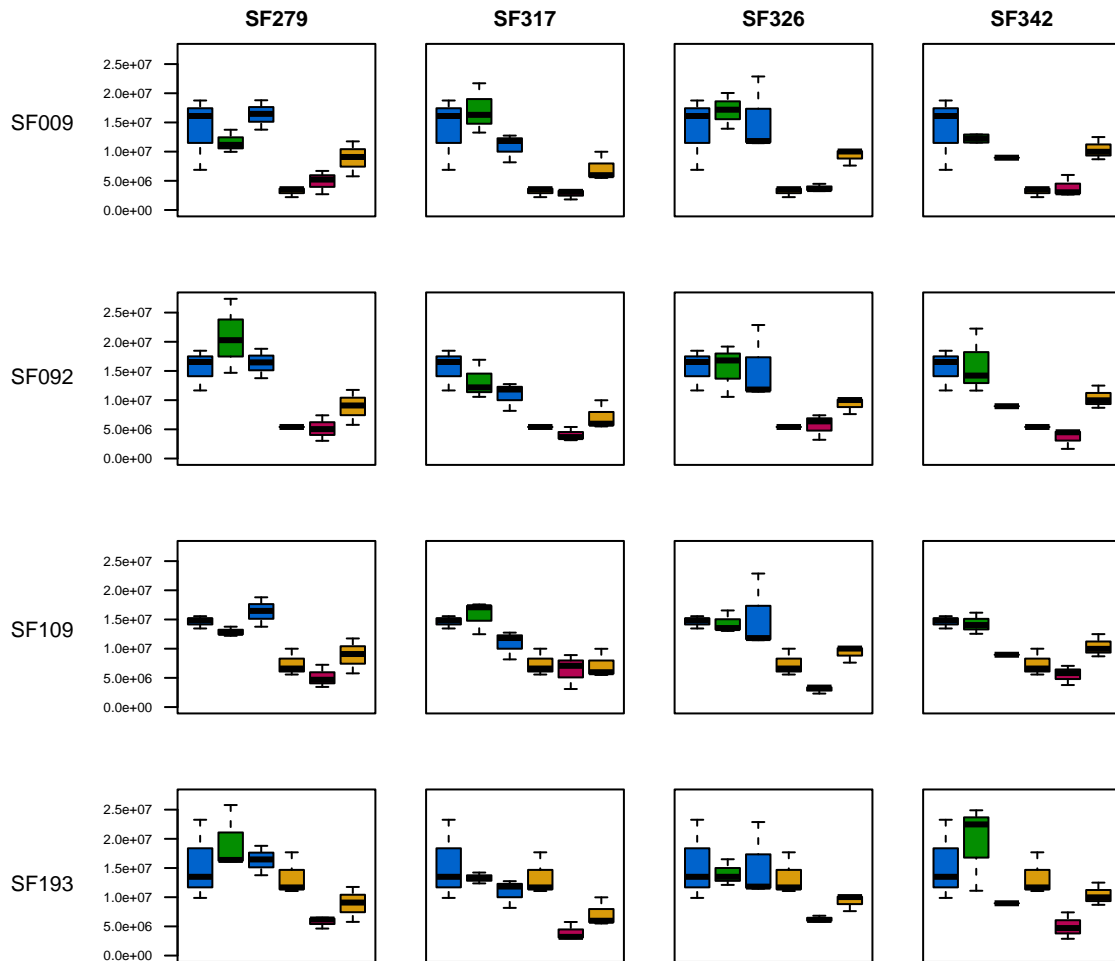

HanXRQChr03g0085111  
Putative SMAD/FHA domain

Parents WW  
Parents WD  
Hybrids WW  
Hybrids WD

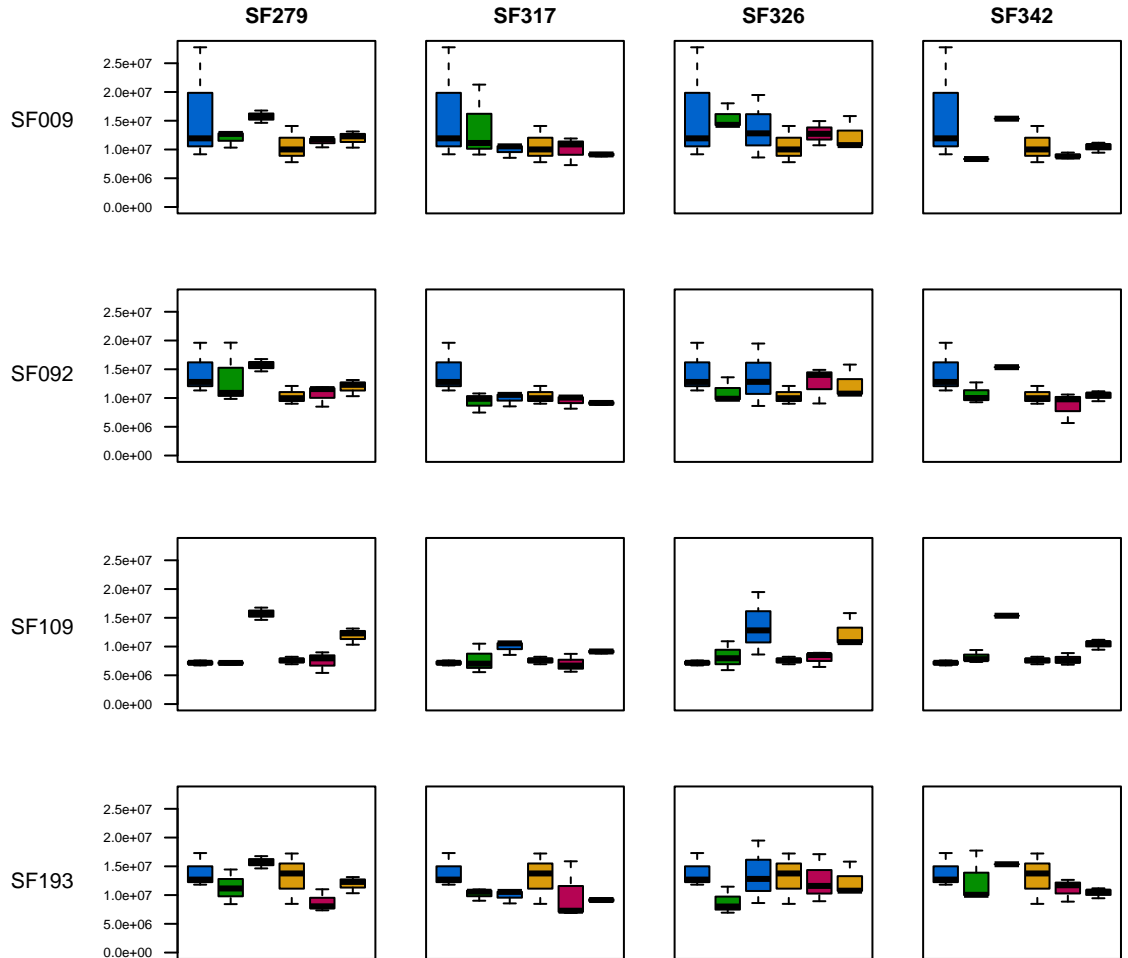



HanXRQChr16g0502611  
Putative translation elongation factor  
IF5A

Parents WW  
Parents WD  
Hybrids WW  
Hybrids WD

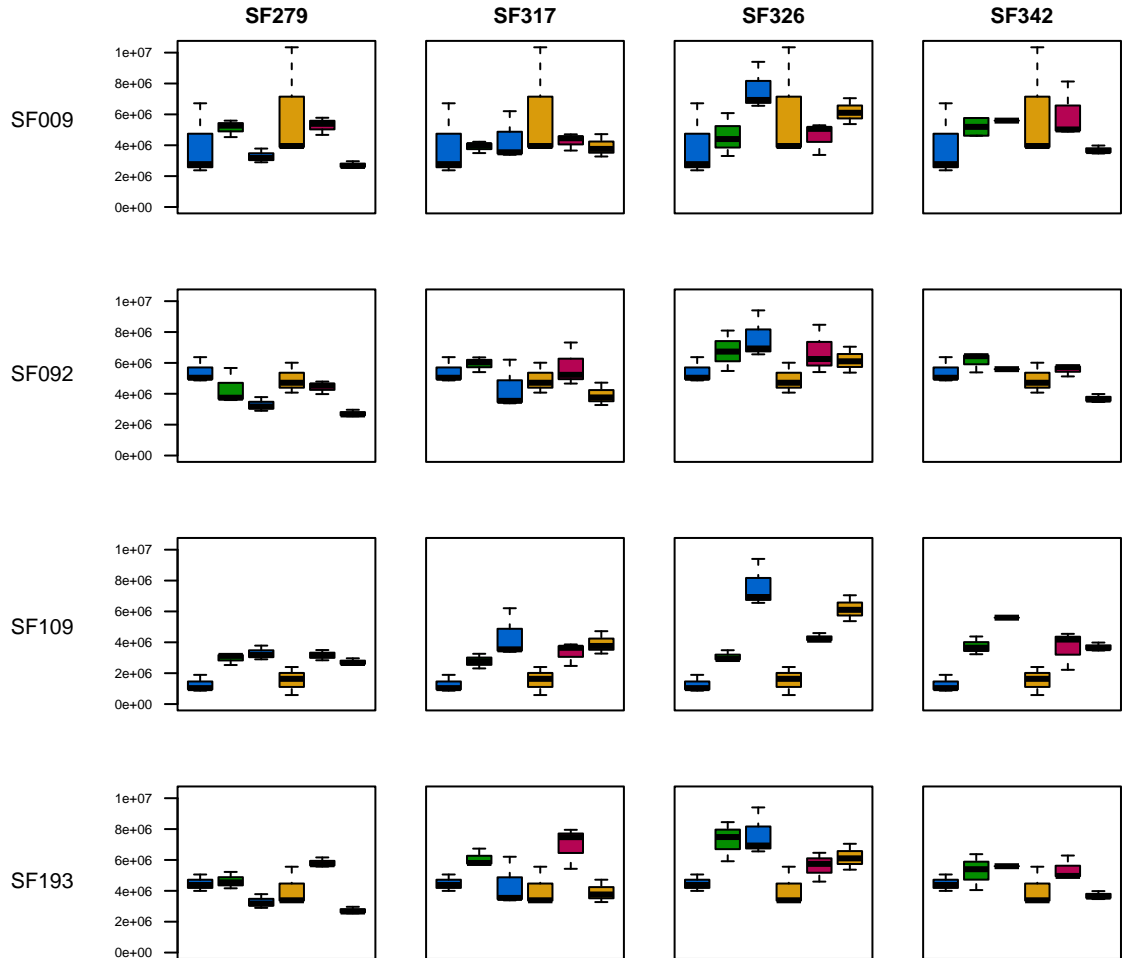

HanXRQChr08g0208631  
Putative small GTPase superfamily, Rab  
type; Small GTPase superfamily, ARF/SAR

Parents WW  
Parents WD  
Hybrids WW  
Hybrids WD

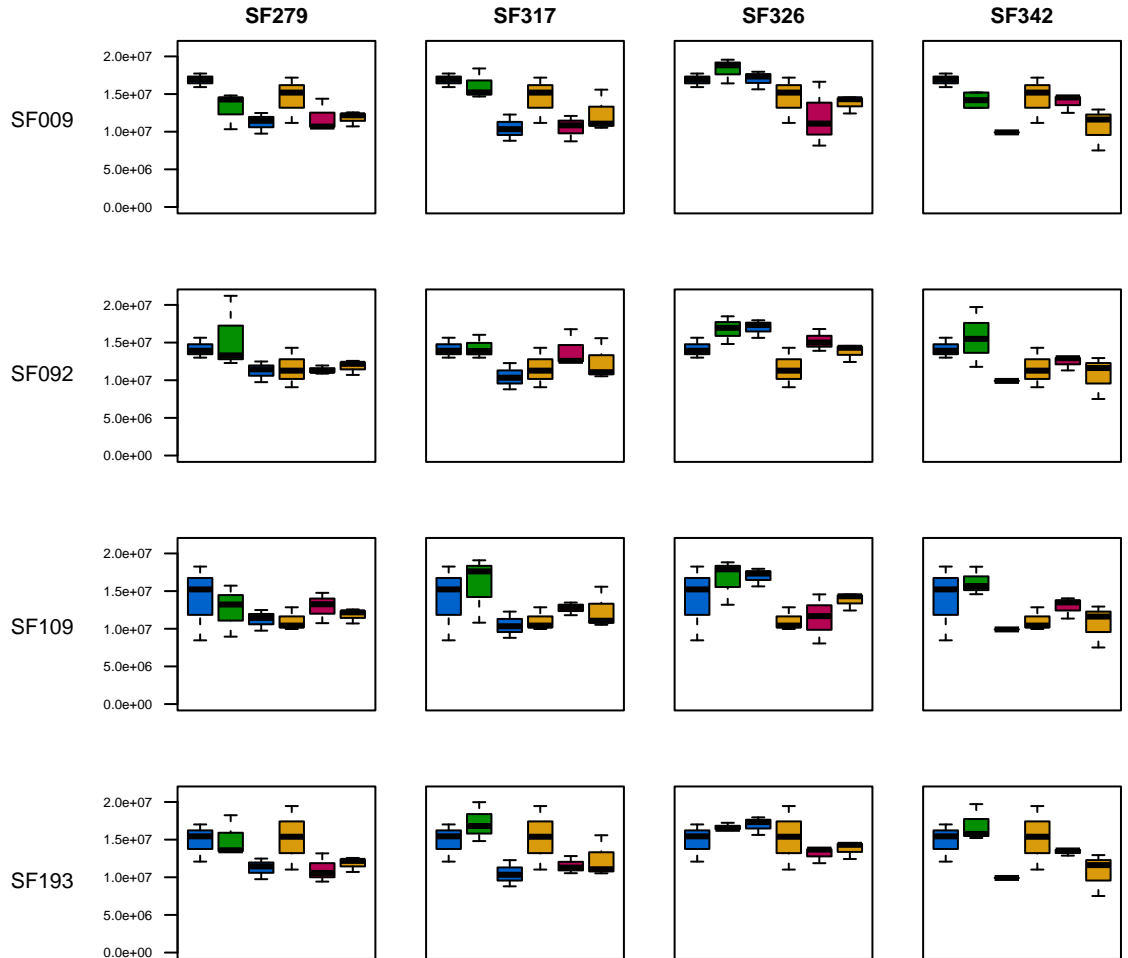

HanXRQChr13g0404801  
Probable phosphoribulokinase

Parents WW  
Parents WD  
Hybrids WW  
Hybrids WD

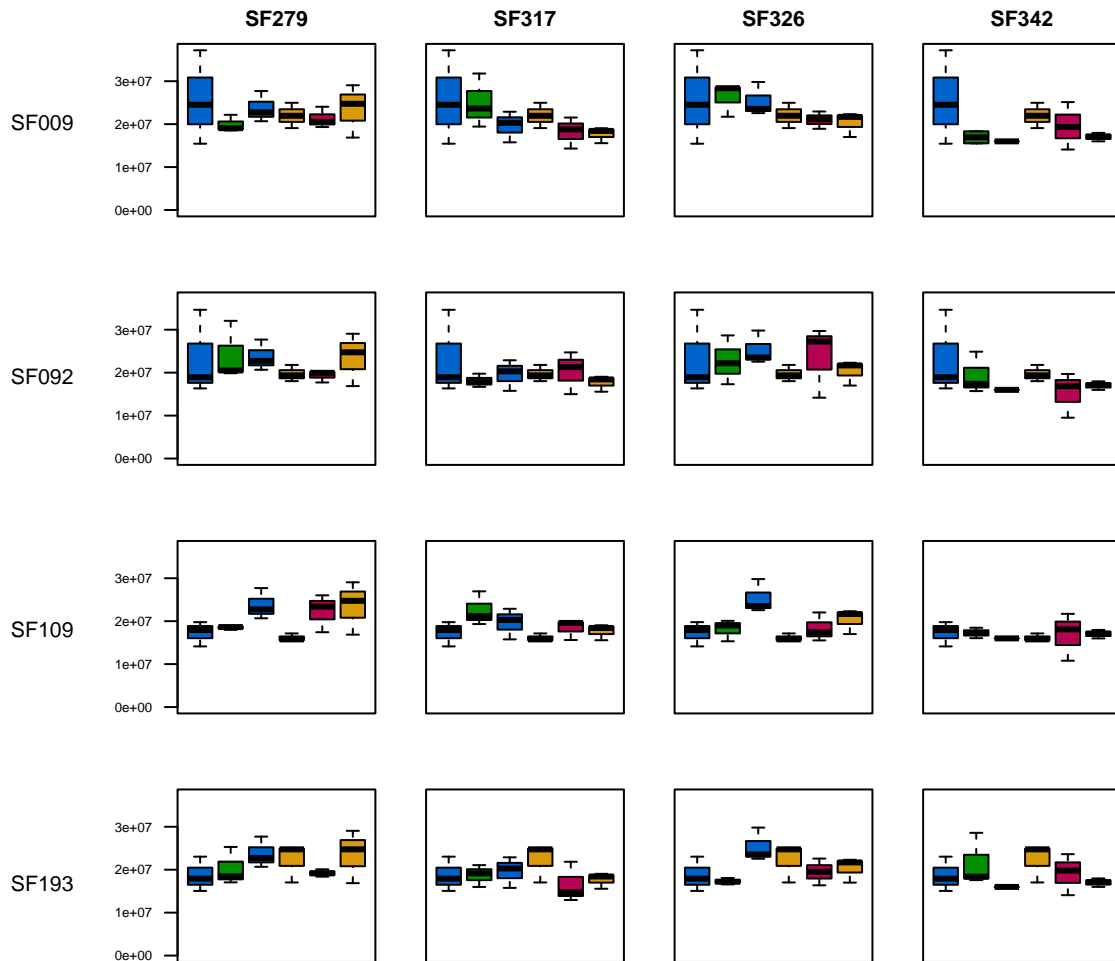

HanXRQChr05g0162331  
Putative haem peroxidase

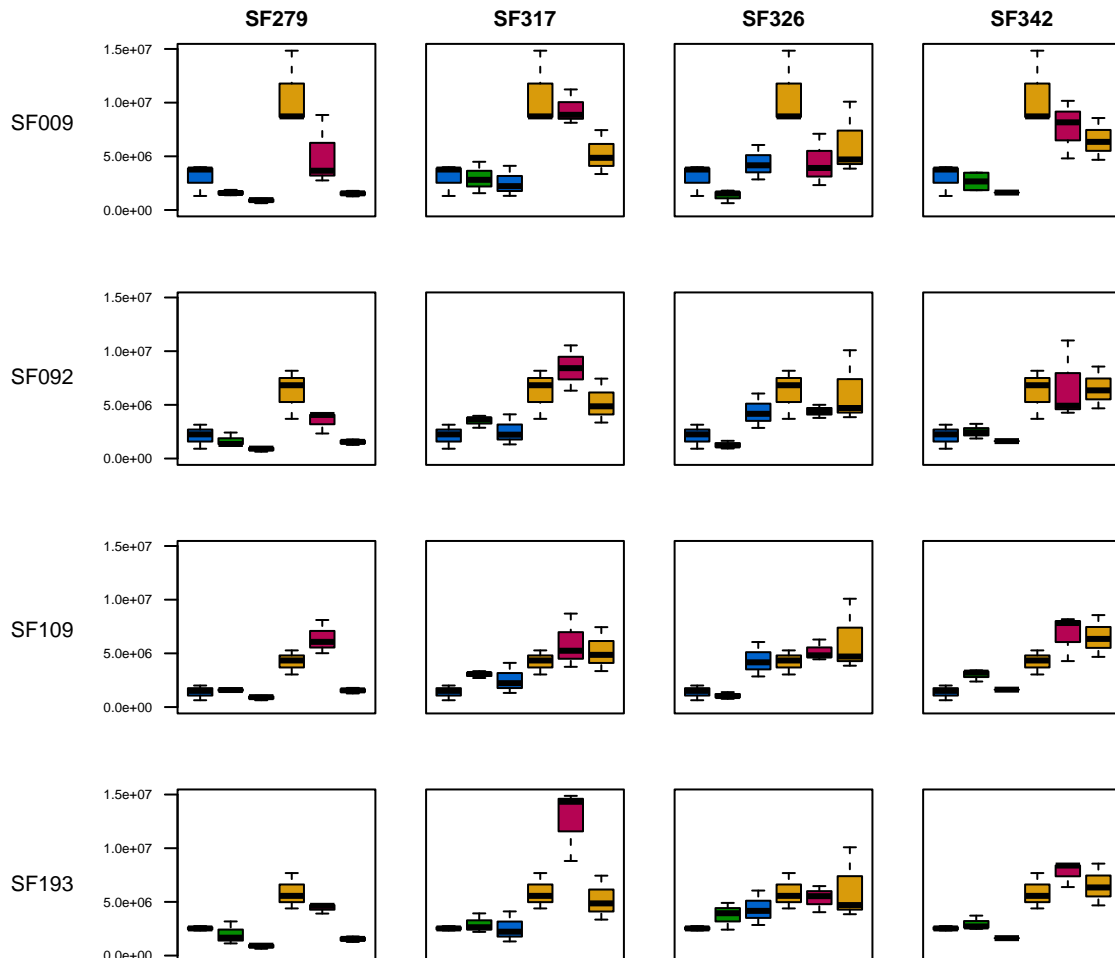

HanXRQChr14g0461441  
Probable acid beta-fructofuranosidase  
AIV-18

Parents WW  
Parents WD  
Hybrids WW  
Hybrids WD

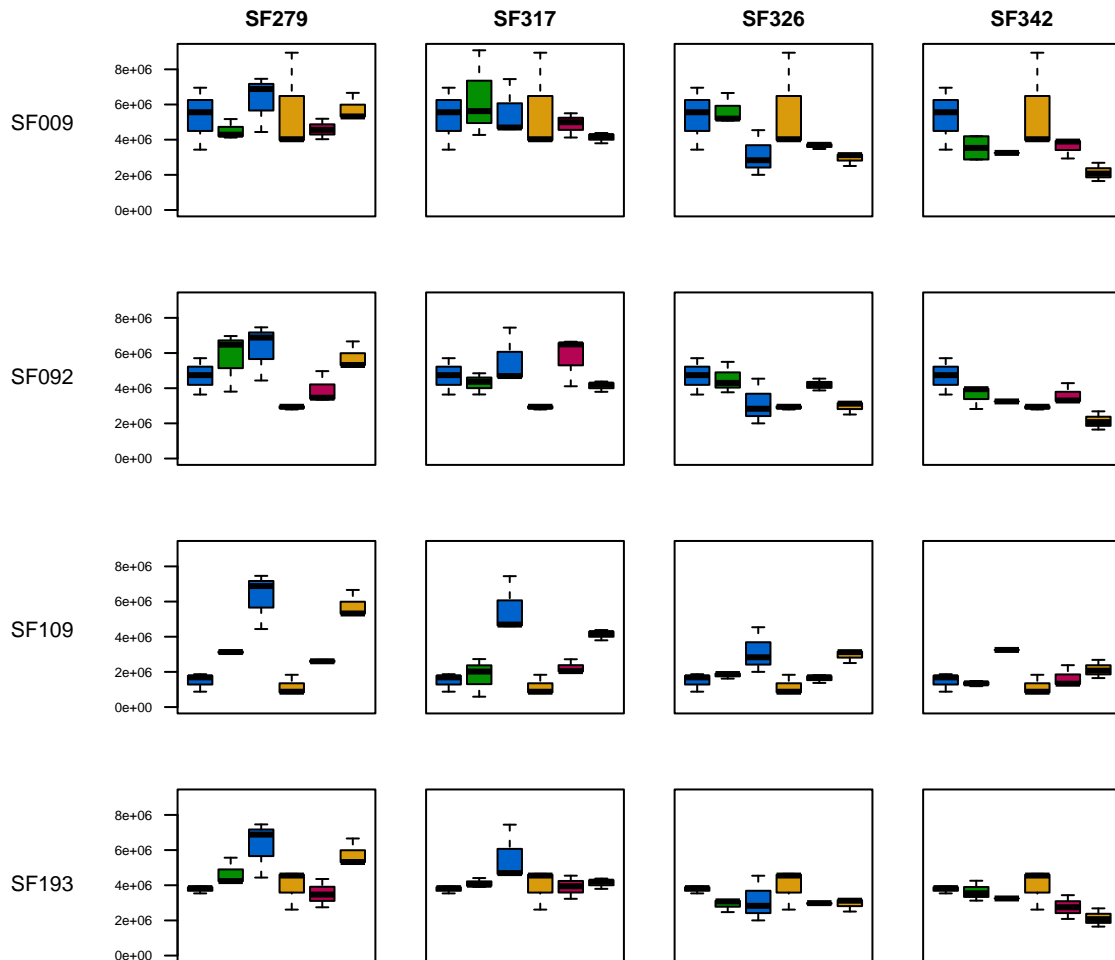

HanXRQChr11g0324731  
Probable polyadenylate-binding protein 1

Parents WW  
Parents WD  
Hybrids WW  
Hybrids WD

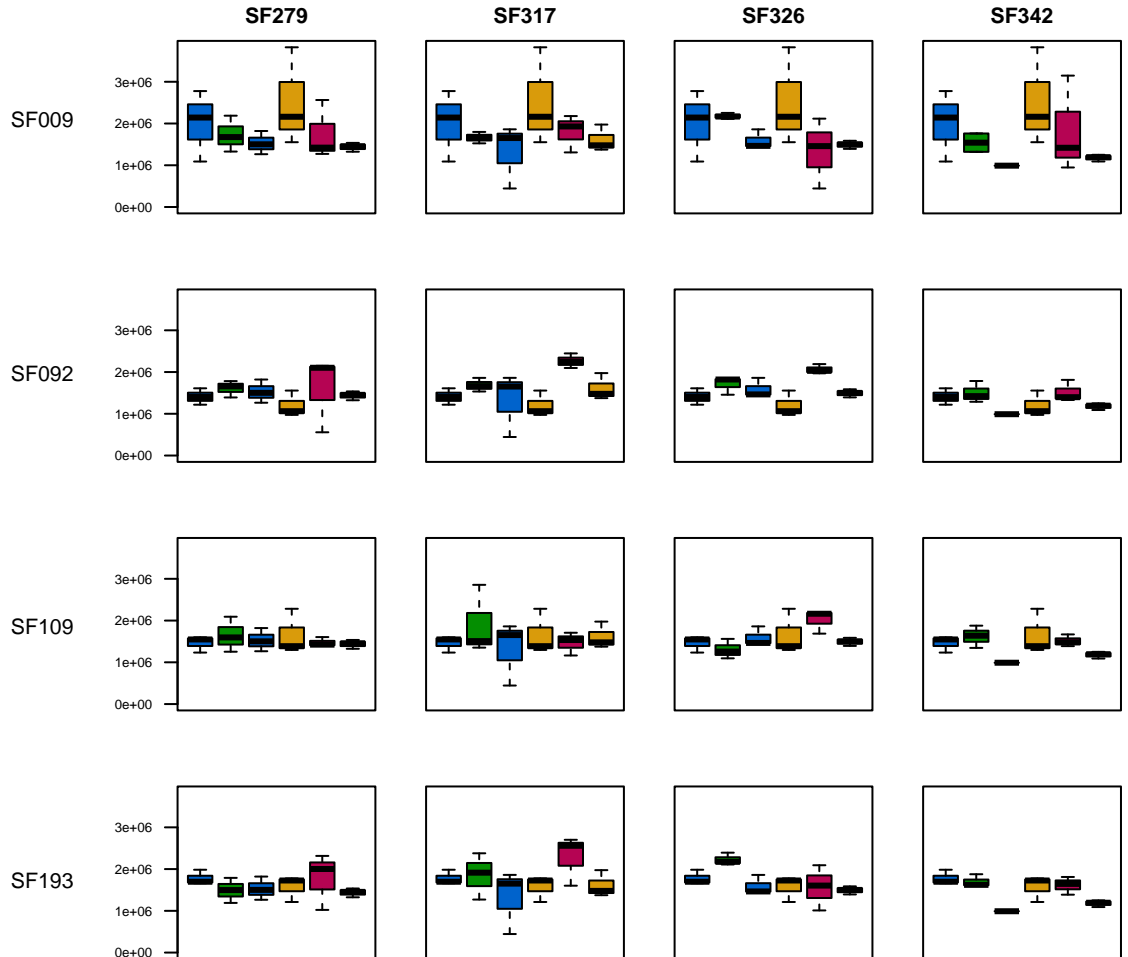

HanXRQChr11g0342801  
Putative dihydrolipoamide  
dehydrogenase; Glutathione-disulphide rec

Parents WW  
Parents WD  
Hybrids WW  
Hybrids WD

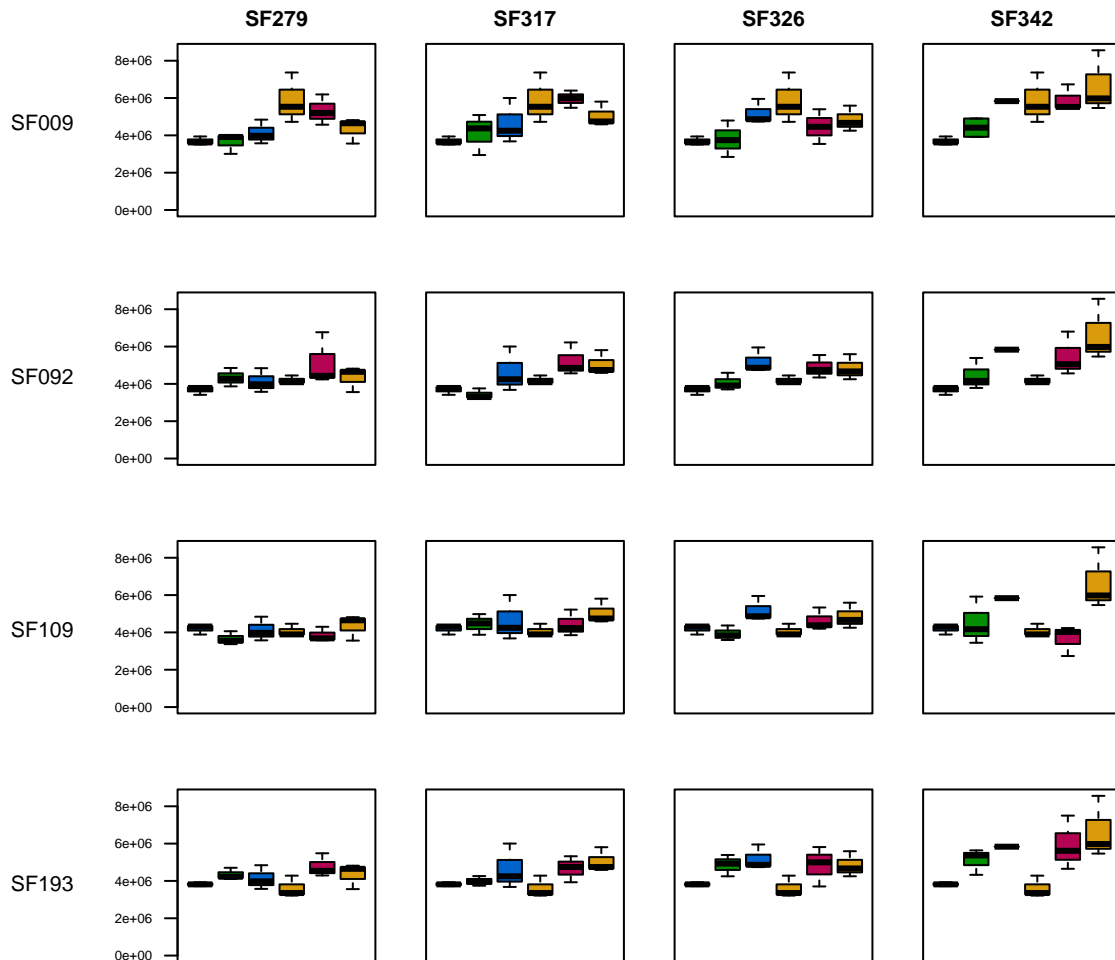

HanXRQChr03g0071301  
Probable ATP-dependent caseinolytic  
(Clp) protease/crotonase family protein

Parents WW  
Parents WD  
Hybrids WW  
Hybrids WD

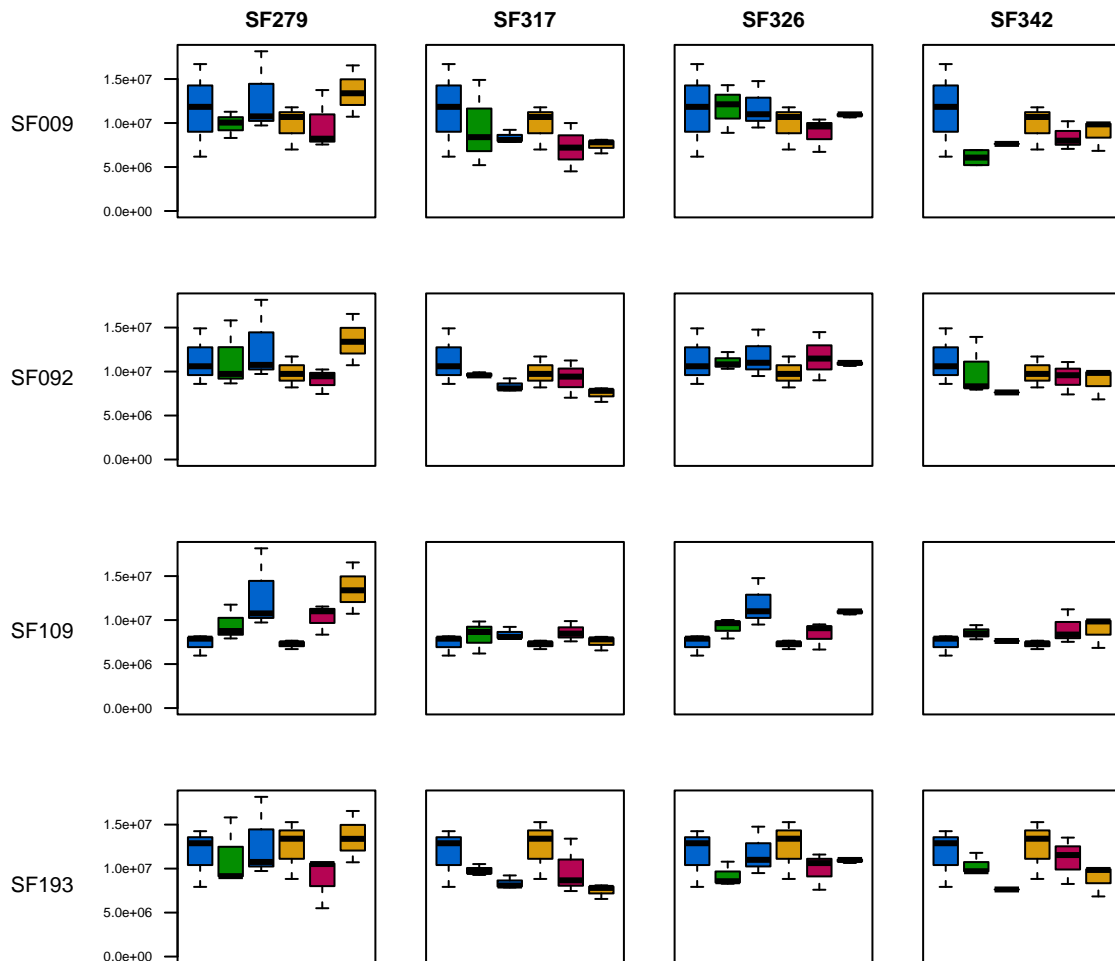



HanXRQChr16g0509611  
Putative ferritin; Ferritin/DPS protein  
domain; Ferritin-like superfamily

Parents WW  
Parents WD  
Hybrids WW  
Hybrids WD

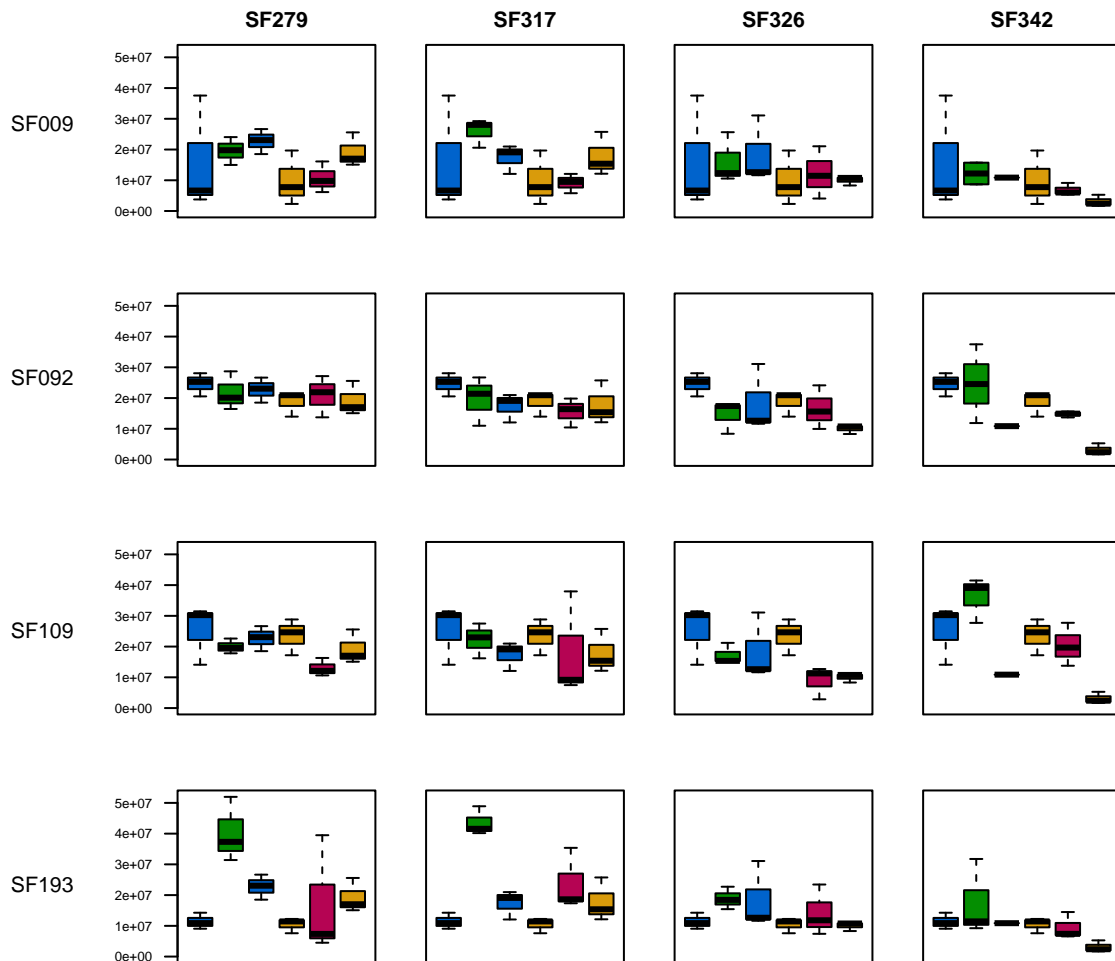

HanXRQChr05g0159111  
Putative ankyrin repeat-containing  
domain

Parents WW  
Parents WD  
Hybrids WW  
Hybrids WD

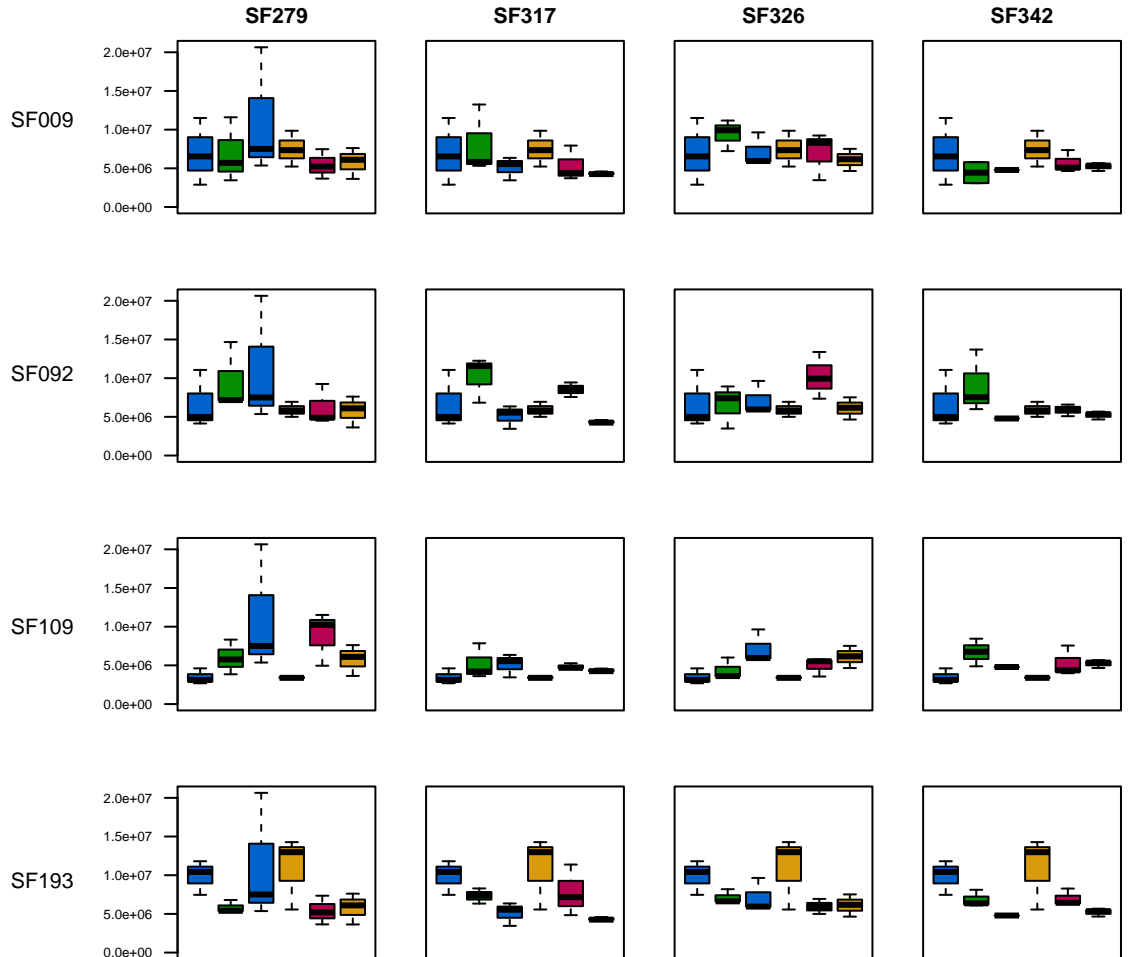

HanXRQChr04g0125051  
Probable S-formylglutathione hydrolase

- Parents WW
- Parents WD
- Hybrids WW
- Hybrids WD

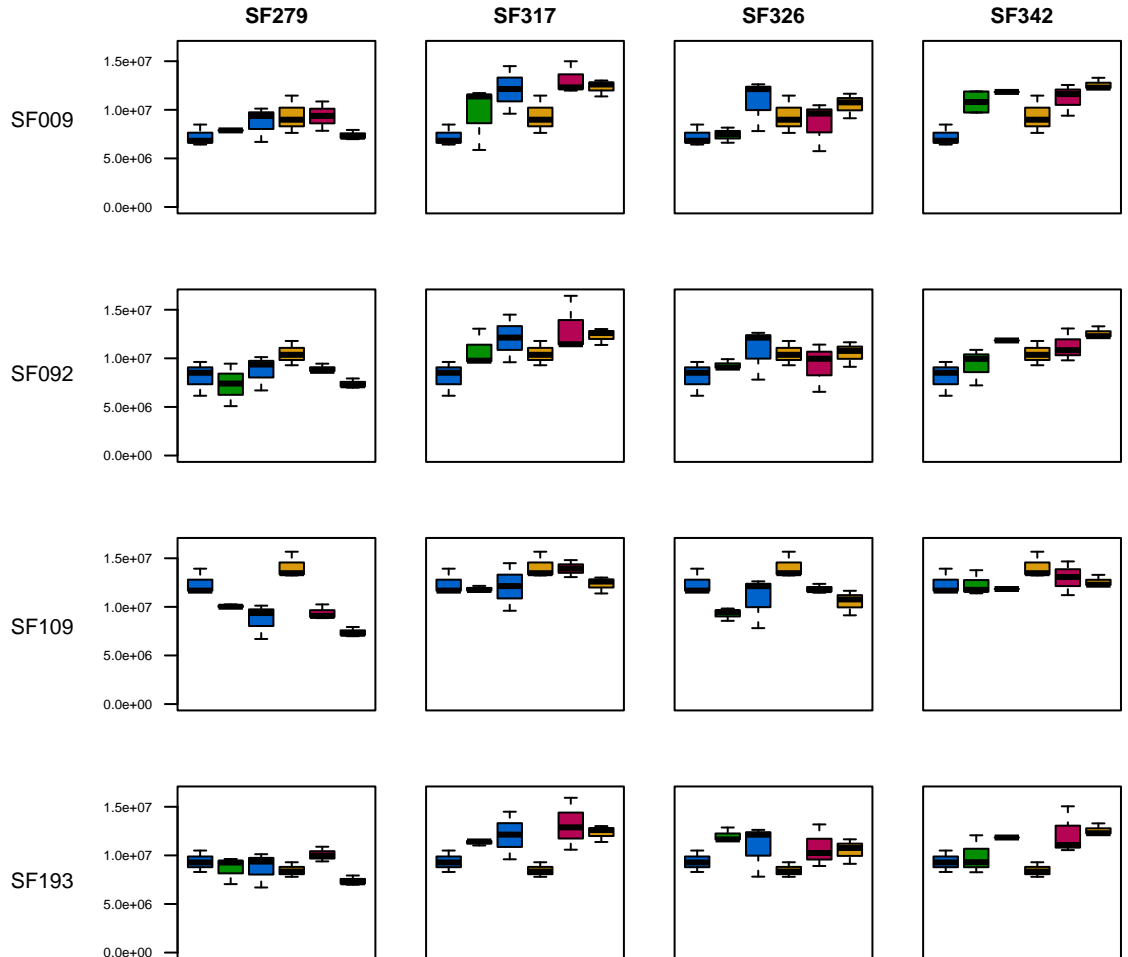

HanXRQChr03g0067521  
Probable dicarboxylate transport 2.1

- Parents WW
- Parents WD
- Hybrids WW
- Hybrids WD

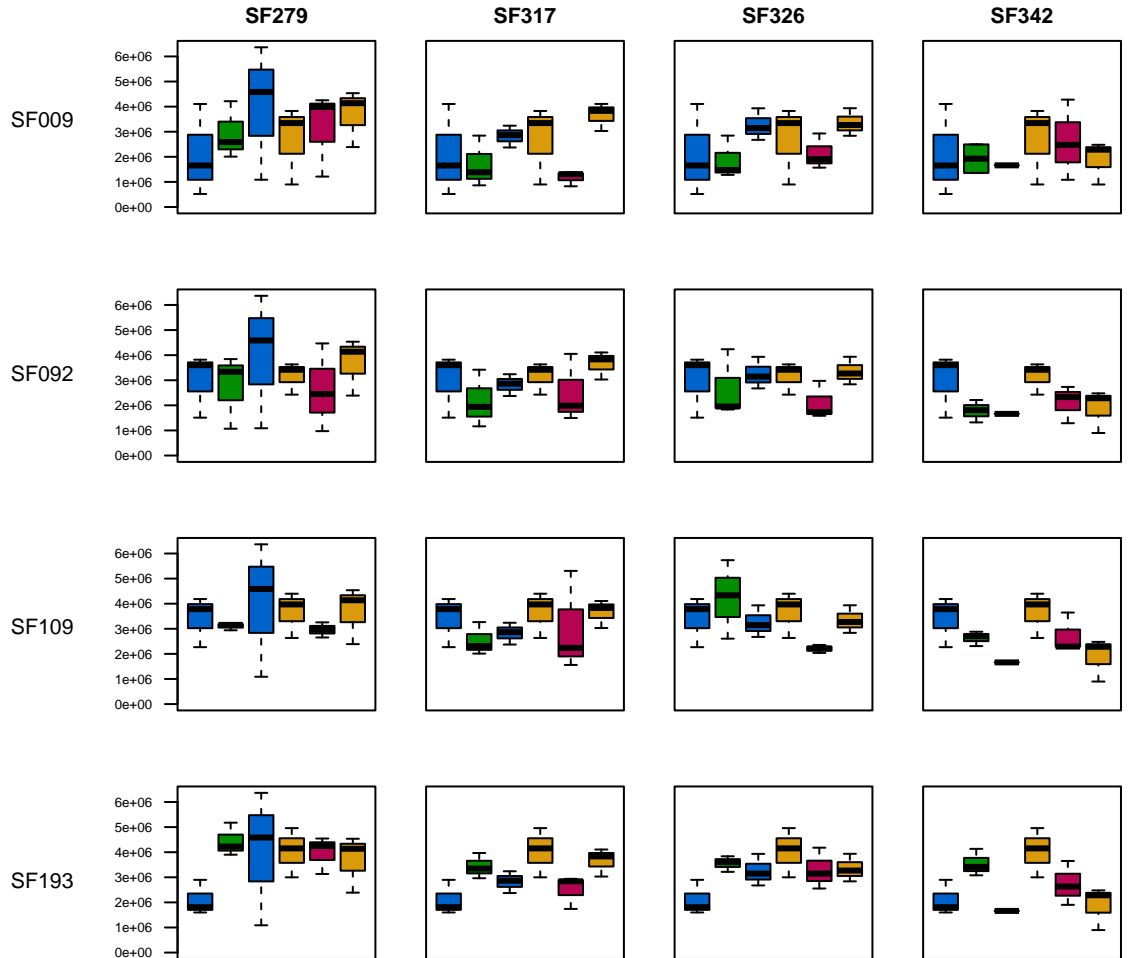

HanXRQChr10g0311601  
 Probable regulatory particle triple-A 1A

Parents WW  
 Parents WD  
 Hybrids WW  
 Hybrids WD

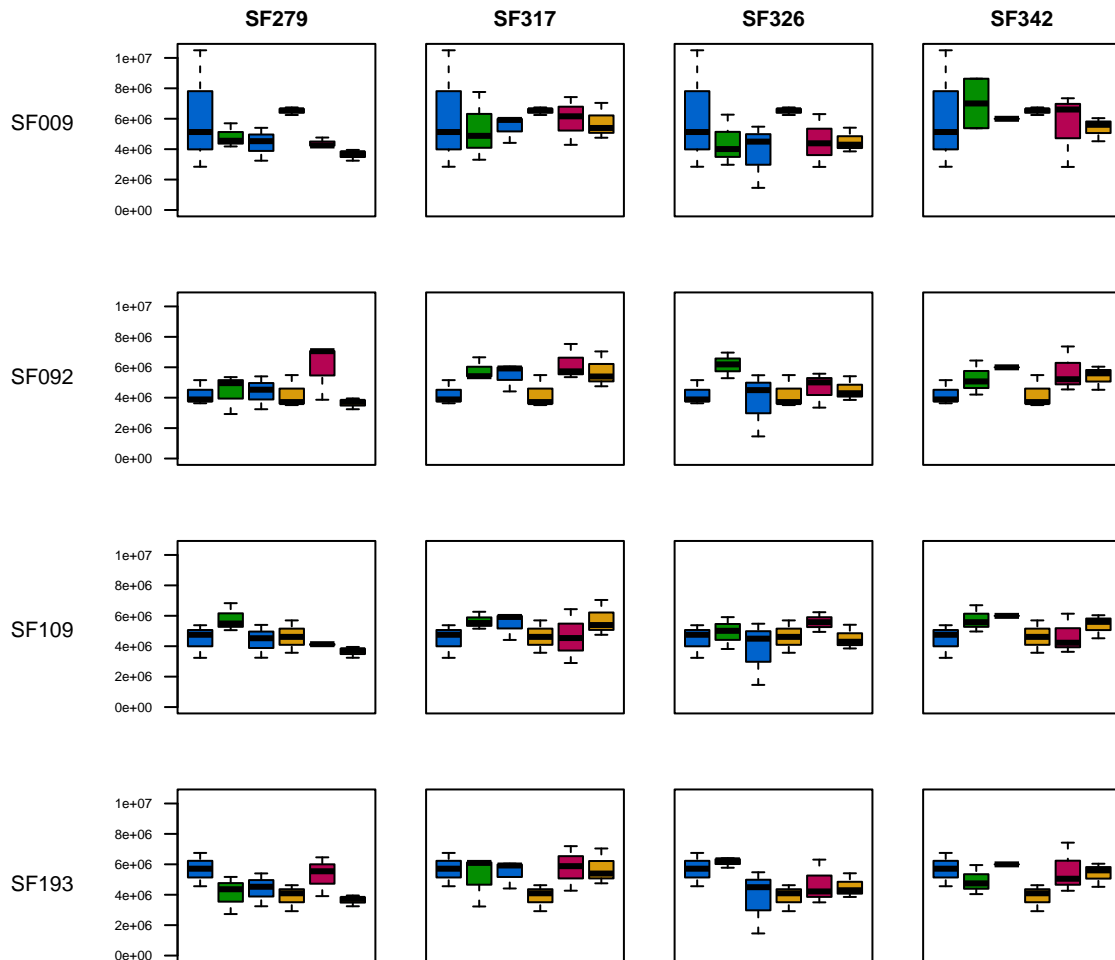

HanXRQChr11g0329811  
Putative chlorophyll A-B binding  
protein; Chlorophyll a/b binding protein dom

Parents WW  
Parents WD  
Hybrids WW  
Hybrids WD

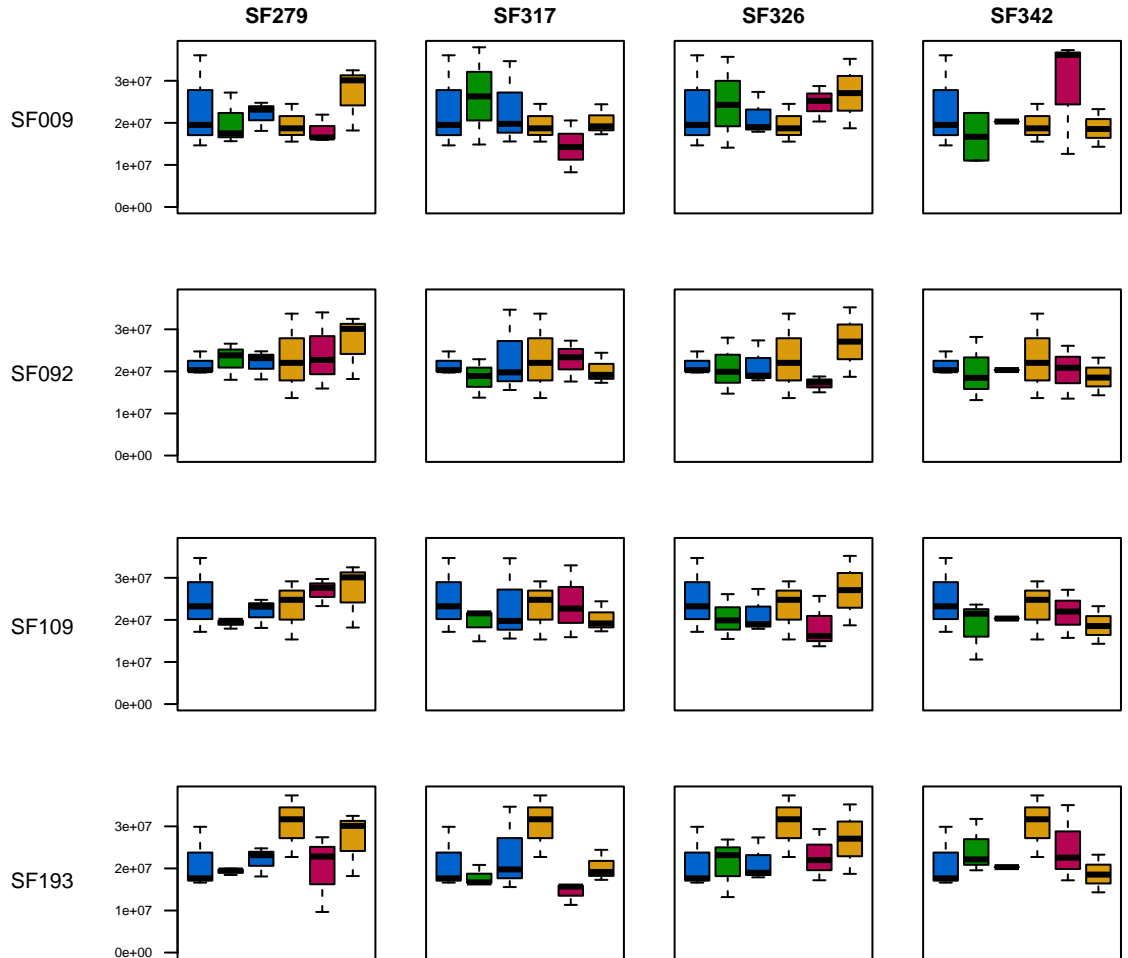

HanXRQChr05g0141691  
Probable serine carboxypeptidase II-2

Parents WW  
Parents WD  
Hybrids WW  
Hybrids WD

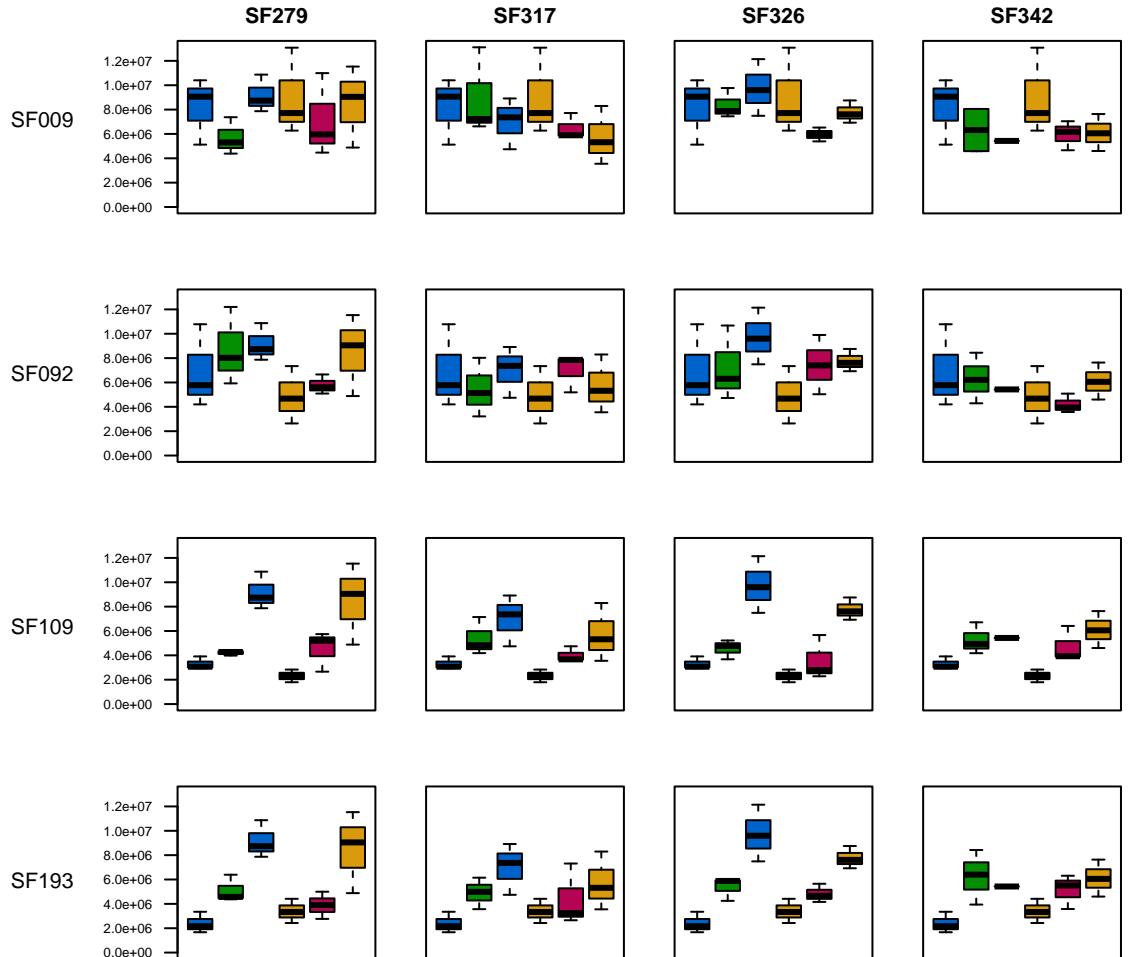

HanXRQChr05g0160531  
Probable phosphoglycerate kinase,  
cytosolic

Parents WW  
Parents WD  
Hybrids WW  
Hybrids WD

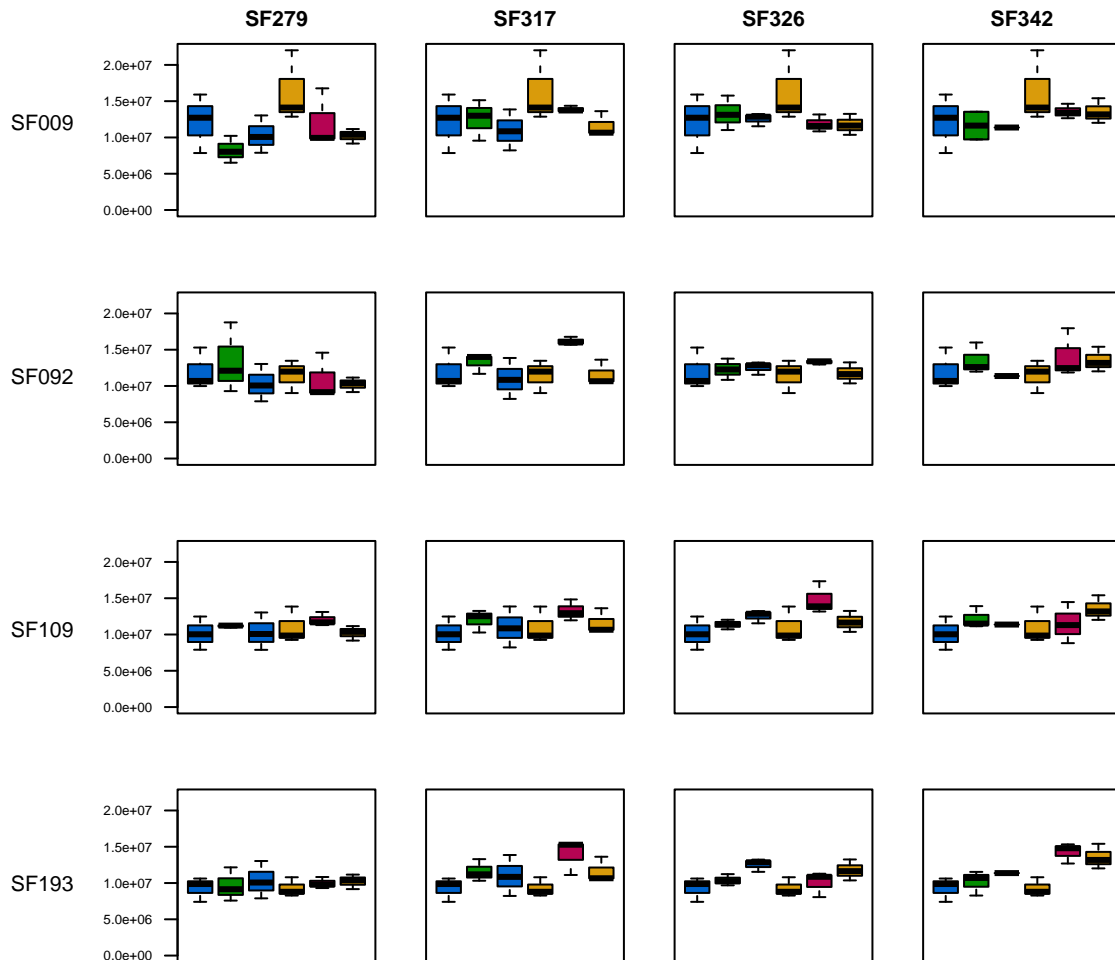



HanXRQChr03g0075231  
Probable chlorophyll a-b binding  
protein 36, chloroplastic

Parents WW  
Parents WD  
Hybrids WW  
Hybrids WD

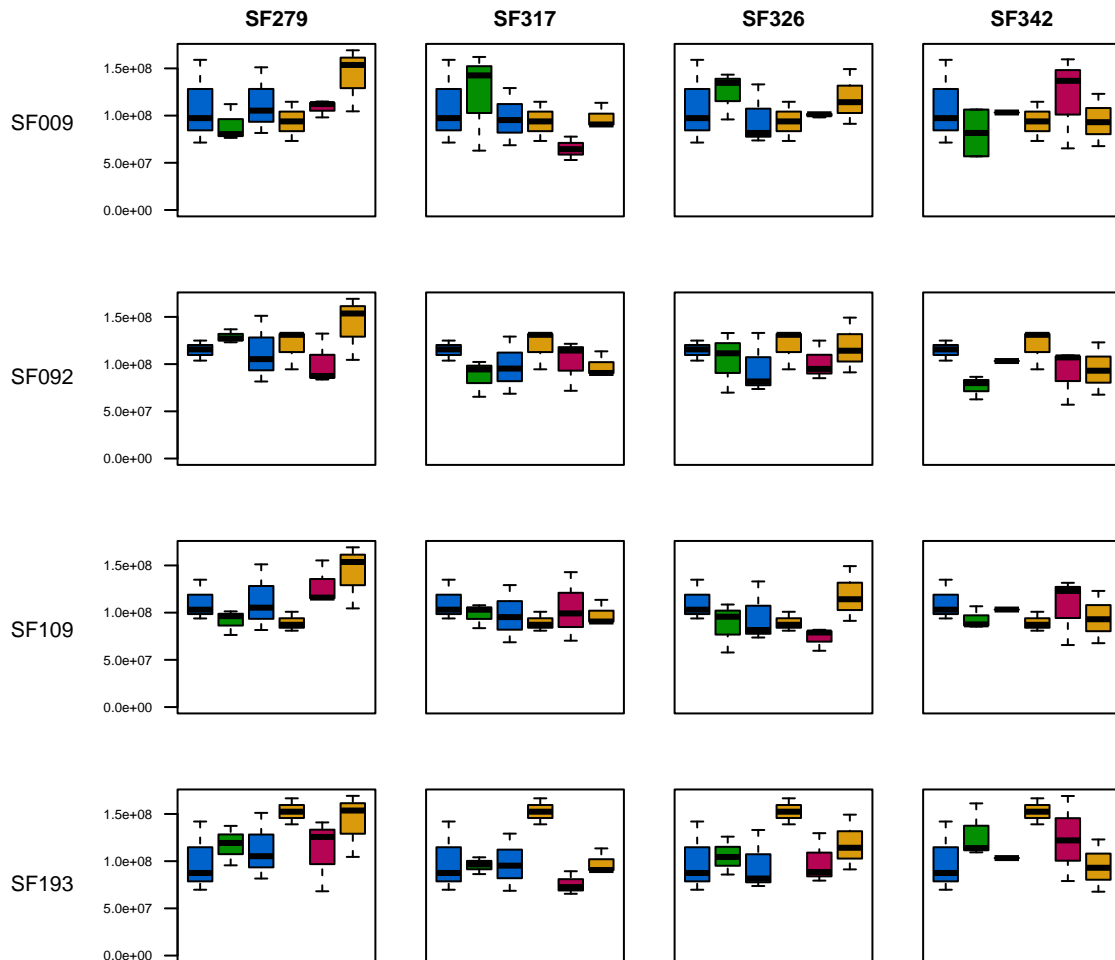

HanXRQChr02g0034381  
Probable mitochondrial substrate  
carrier family protein

Parents WW  
Parents WD  
Hybrids WW  
Hybrids WD

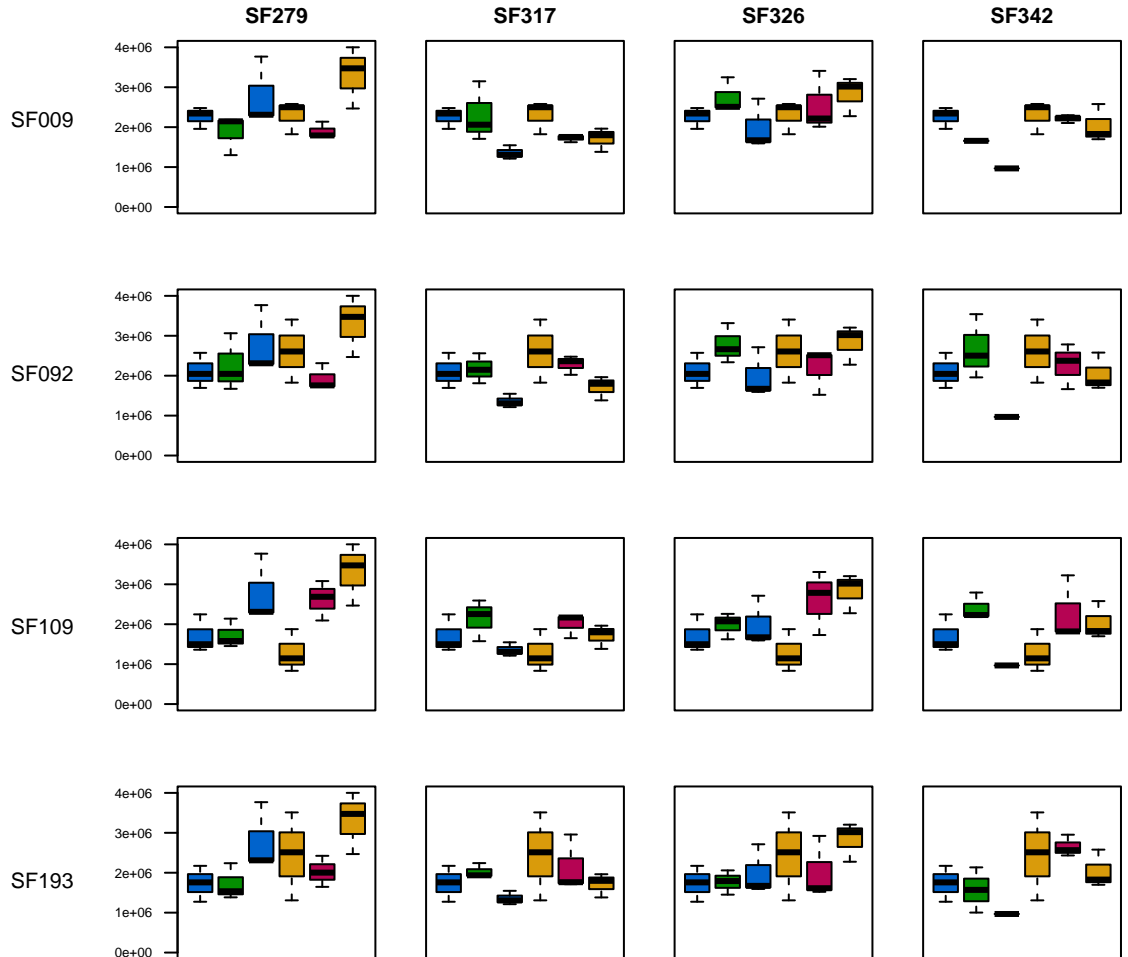

HanXRQChr16g0504021  
Probable peroxin 14

Parents WW  
Parents WD  
Hybrids WW  
Hybrids WD

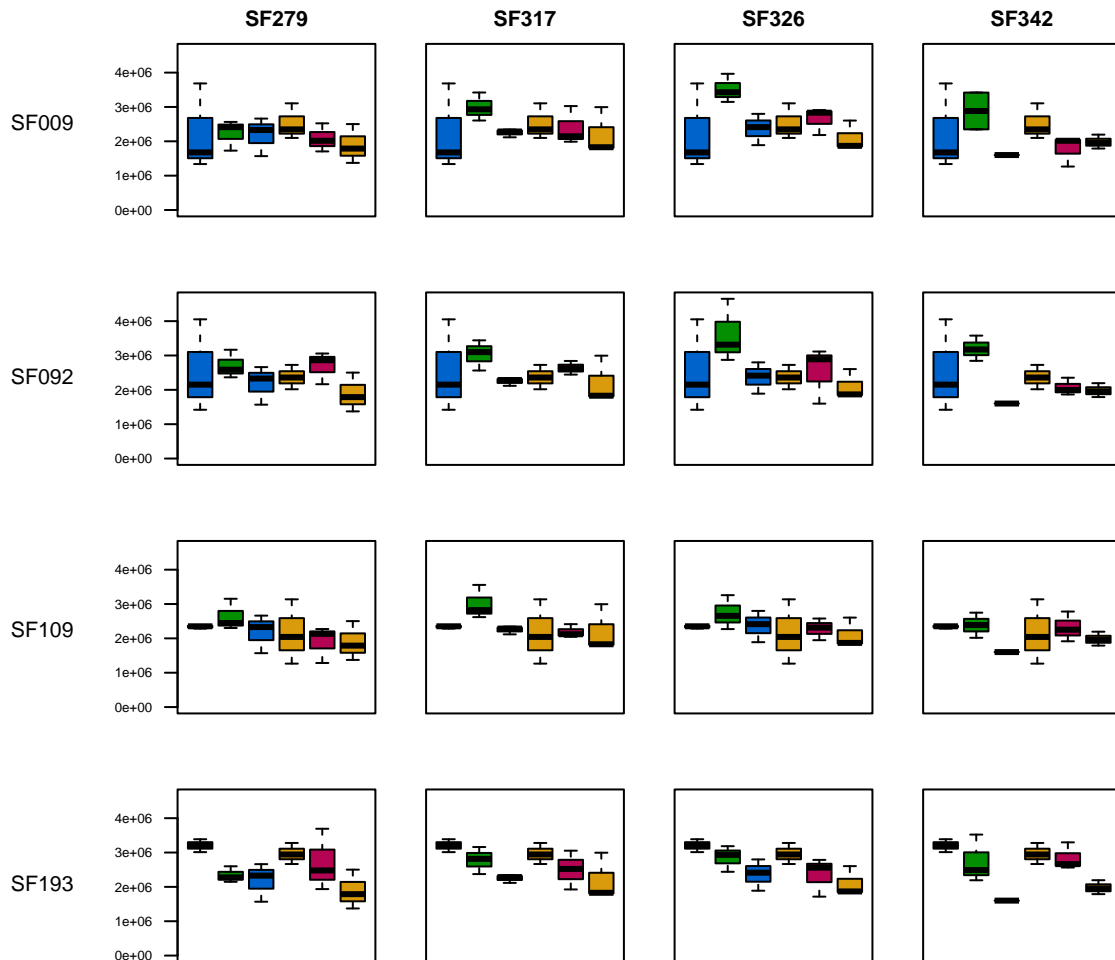

HanXRQChr05g0150331  
Probable inorganic pyrophosphatase

Parents WW  
Parents WD  
Hybrids WW  
Hybrids WD

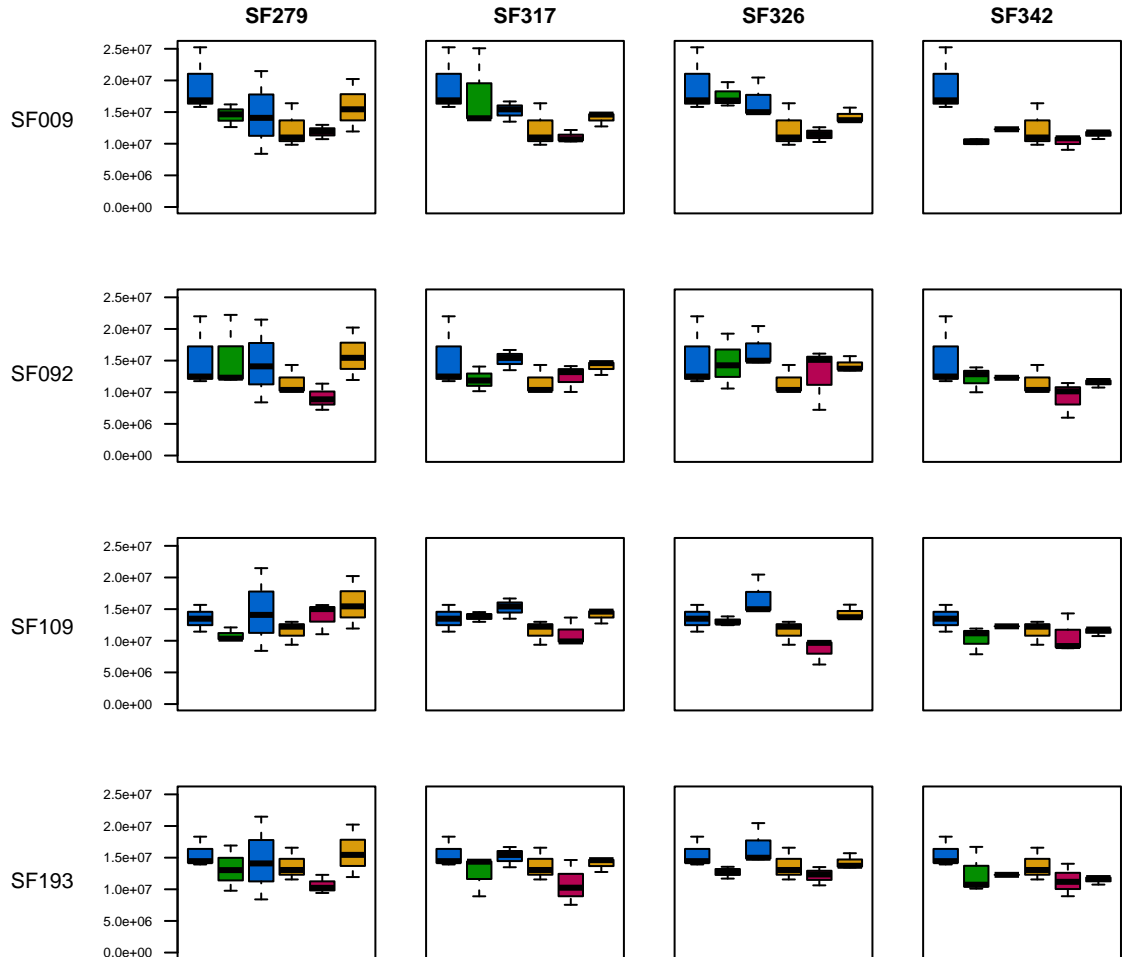

HanXRQChr05g0136881  
Probable mitochondrial HSO70 2

- Parents WW
- Parents WD
- Hybrids WW
- Hybrids WD

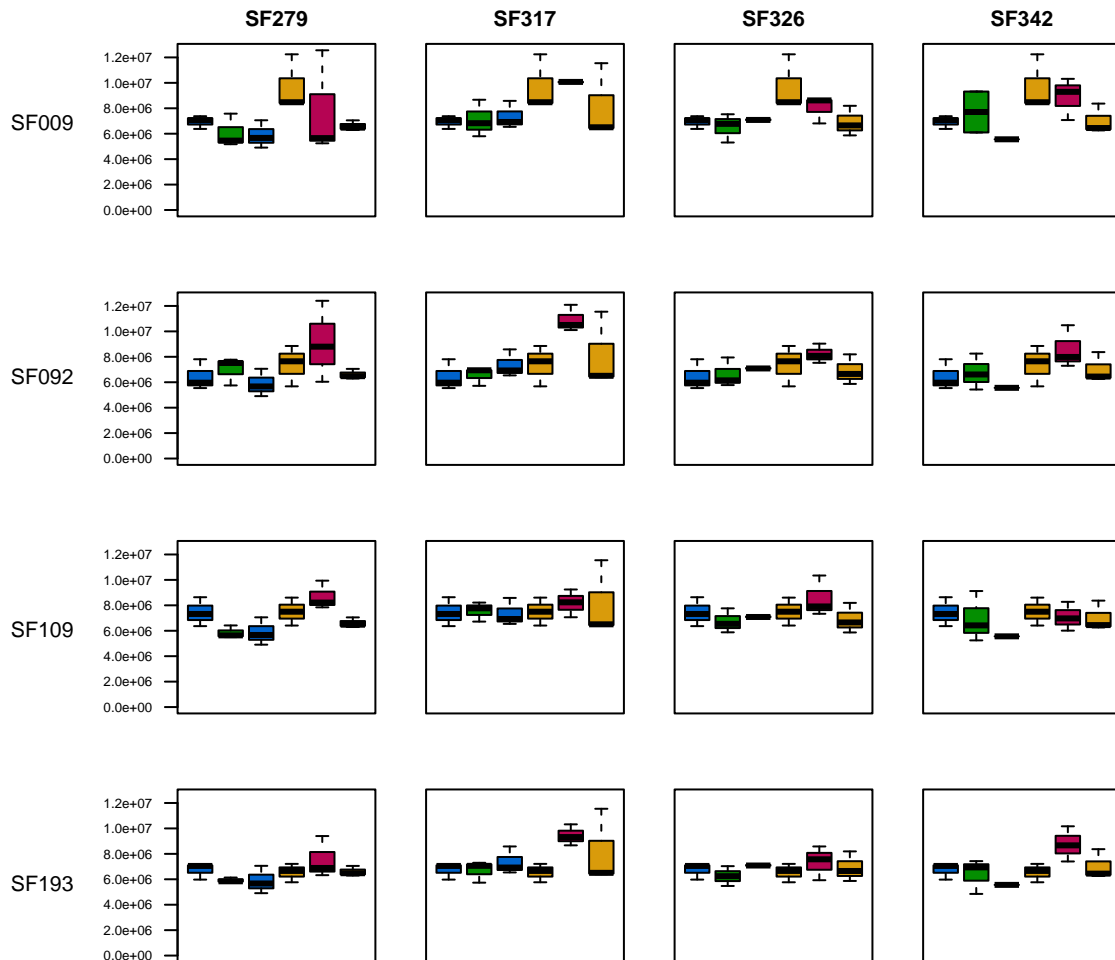

HanXRQChr09g0265851  
Putative alpha/Beta hydrolase fold

Parents WW  
Parents WD  
Hybrids WW  
Hybrids WD

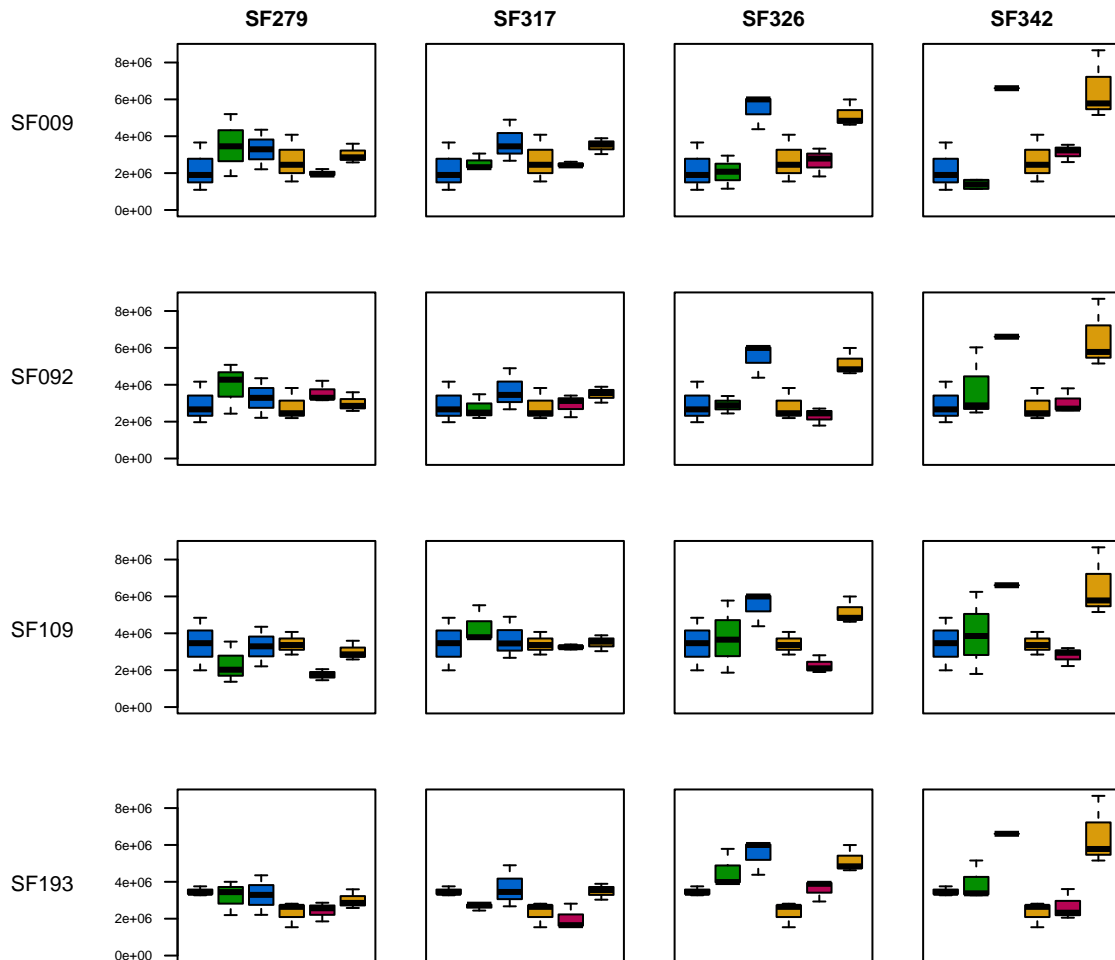

HanXRQChr04g0121211  
Probable L-3-cyanoalanine synthase 2,  
mitochondrial

Parents WW  
Parents WD  
Hybrids WW  
Hybrids WD

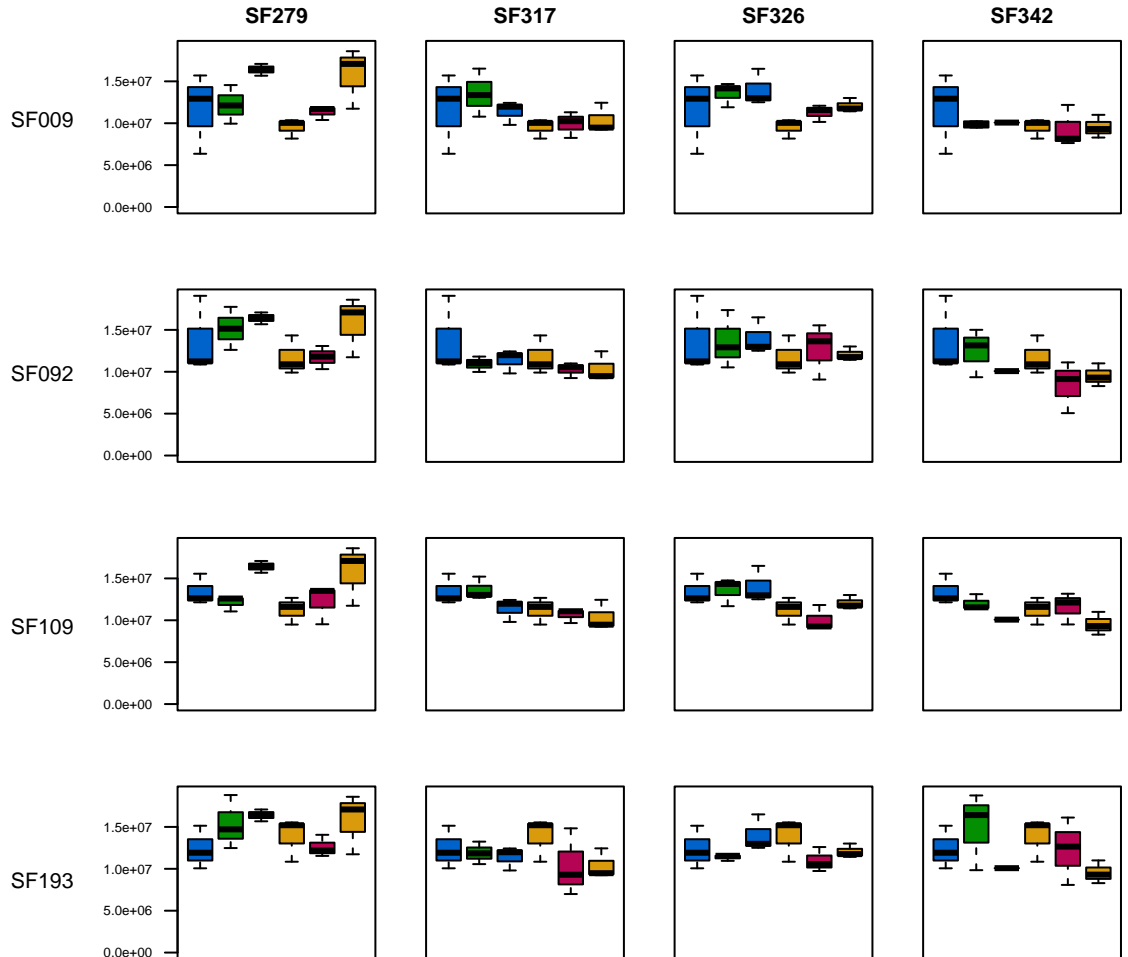

HanXRQChr05g0160351  
Probable photosystem I reaction center  
subunit V, chloroplastic

Parents WW  
Parents WD  
Hybrids WW  
Hybrids WD

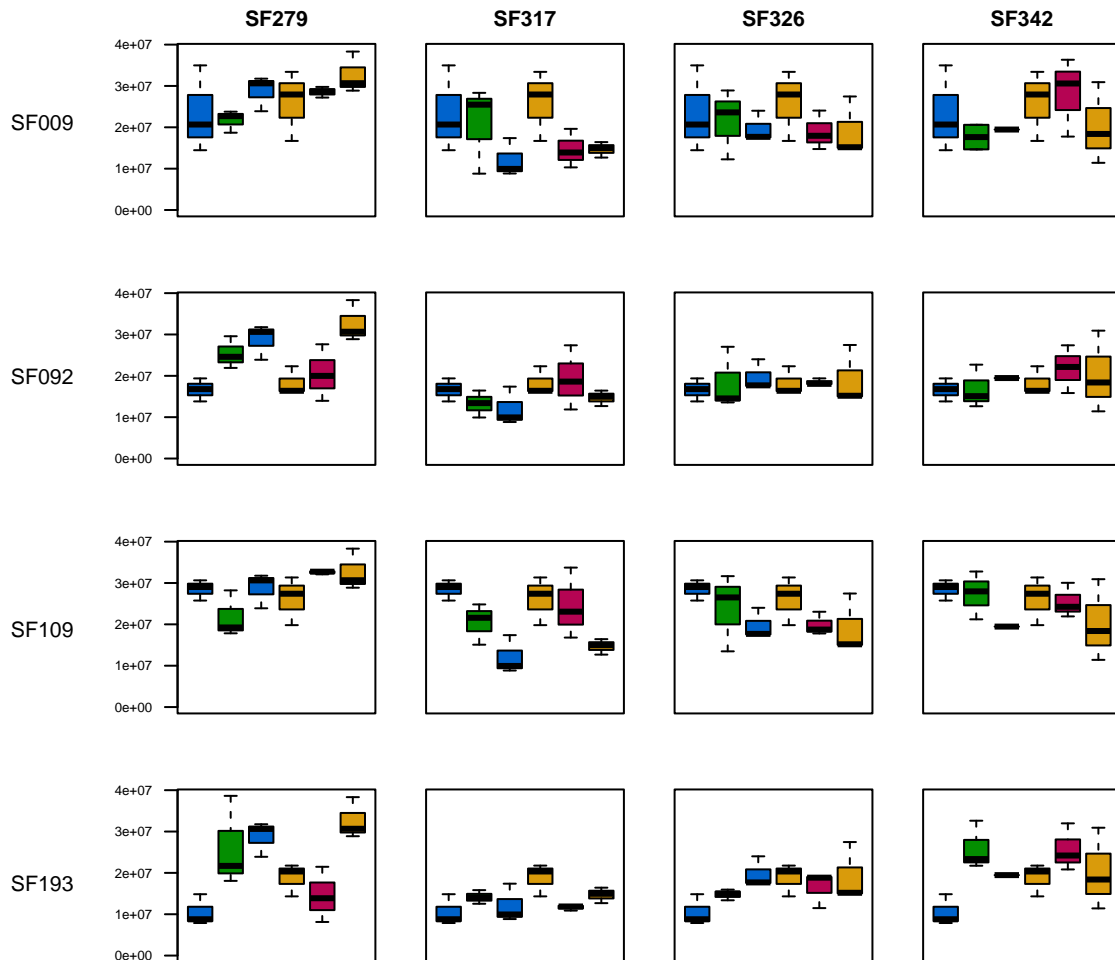



HanXRQChr03g0090441  
Putative START-like domain; Bet v I  
type allergen

Parents WW  
Parents WD  
Hybrids WW  
Hybrids WD

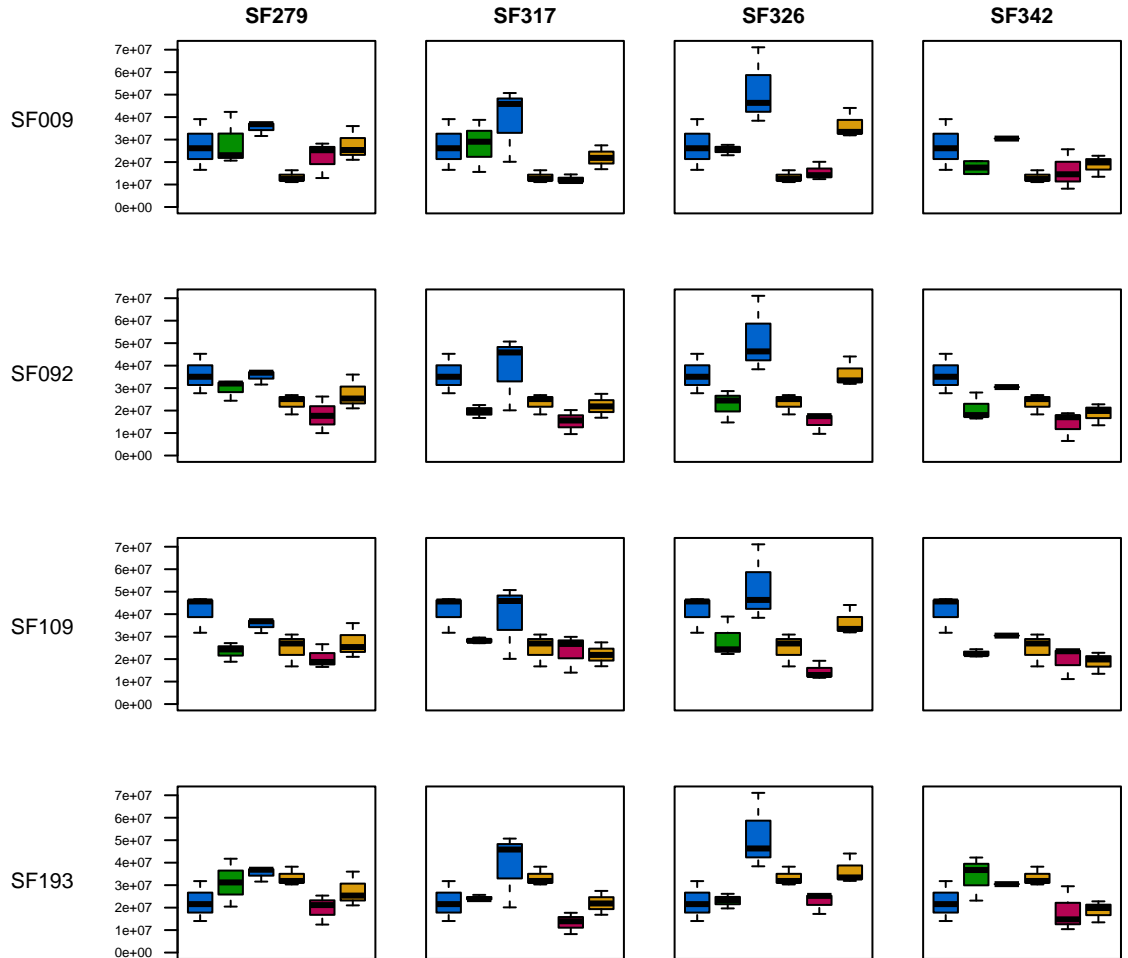

HanXRQChr01g0007781  
Putative protein RETICULATA-related

Parents WW  
Parents WD  
Hybrids WW  
Hybrids WD

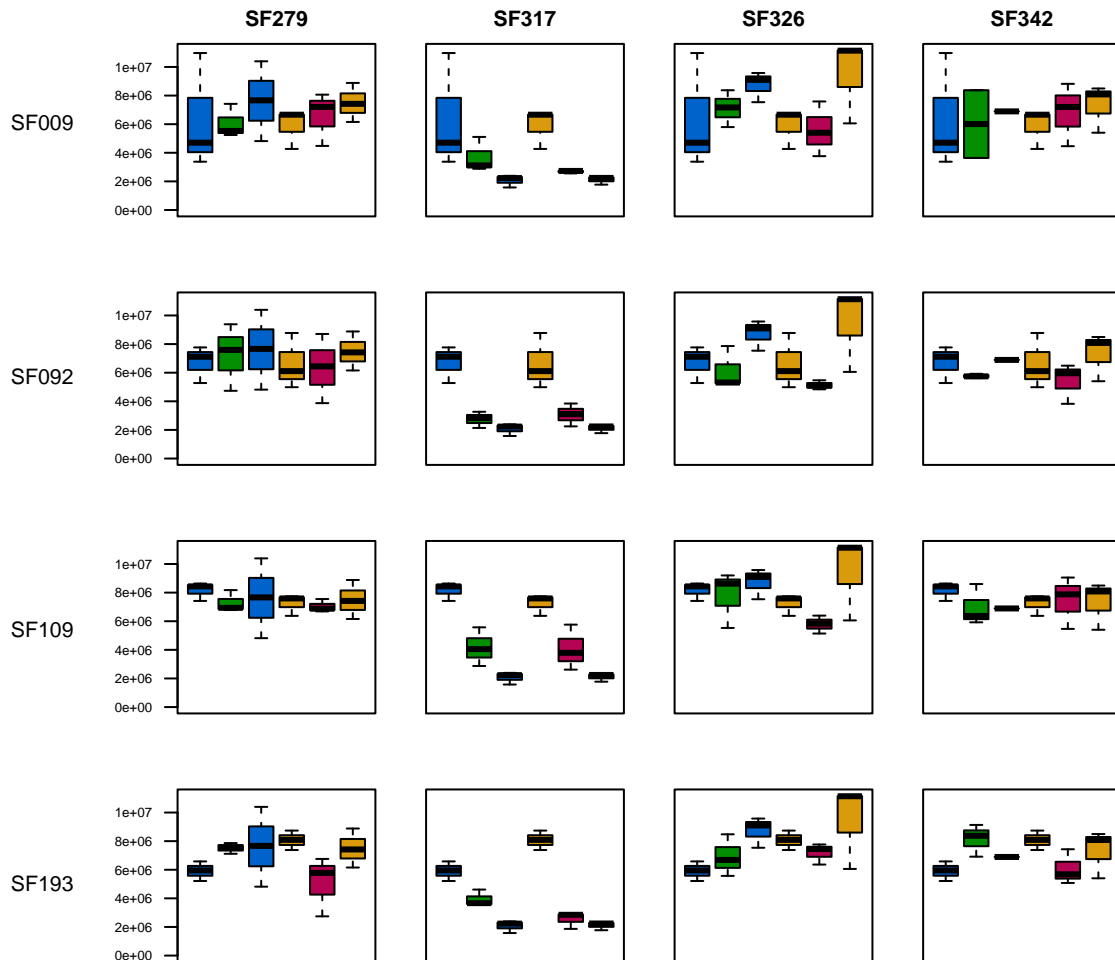

HanXRQChr08g0225151  
Probable tetratricopeptide repeat  
(TPR)–like superfamily protein

Parents WW  
Parents WD  
Hybrids WW  
Hybrids WD

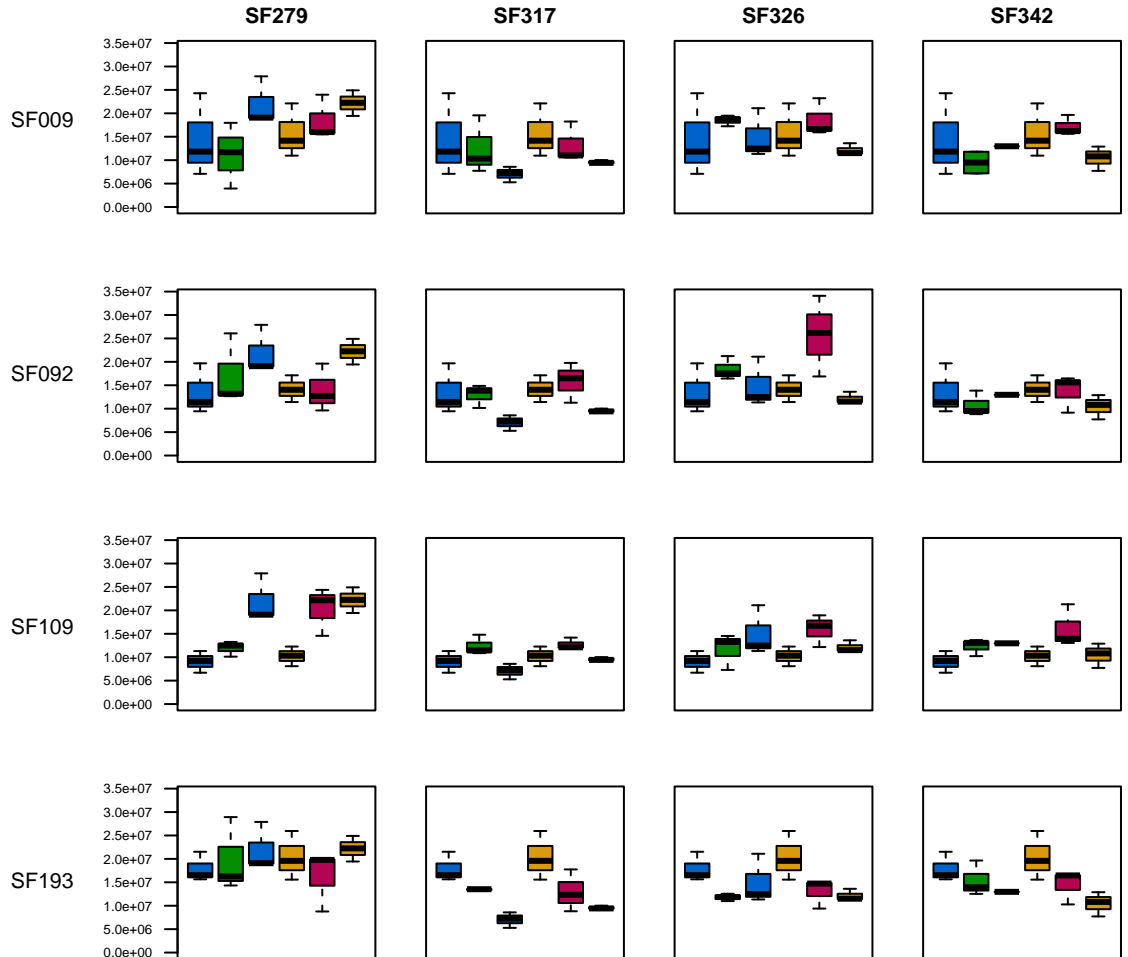

HanXRQChr11g0342581  
Probable triose phosphate/phosphate  
translocator, chloroplastic

Parents WW  
Parents WD  
Hybrids WW  
Hybrids WD

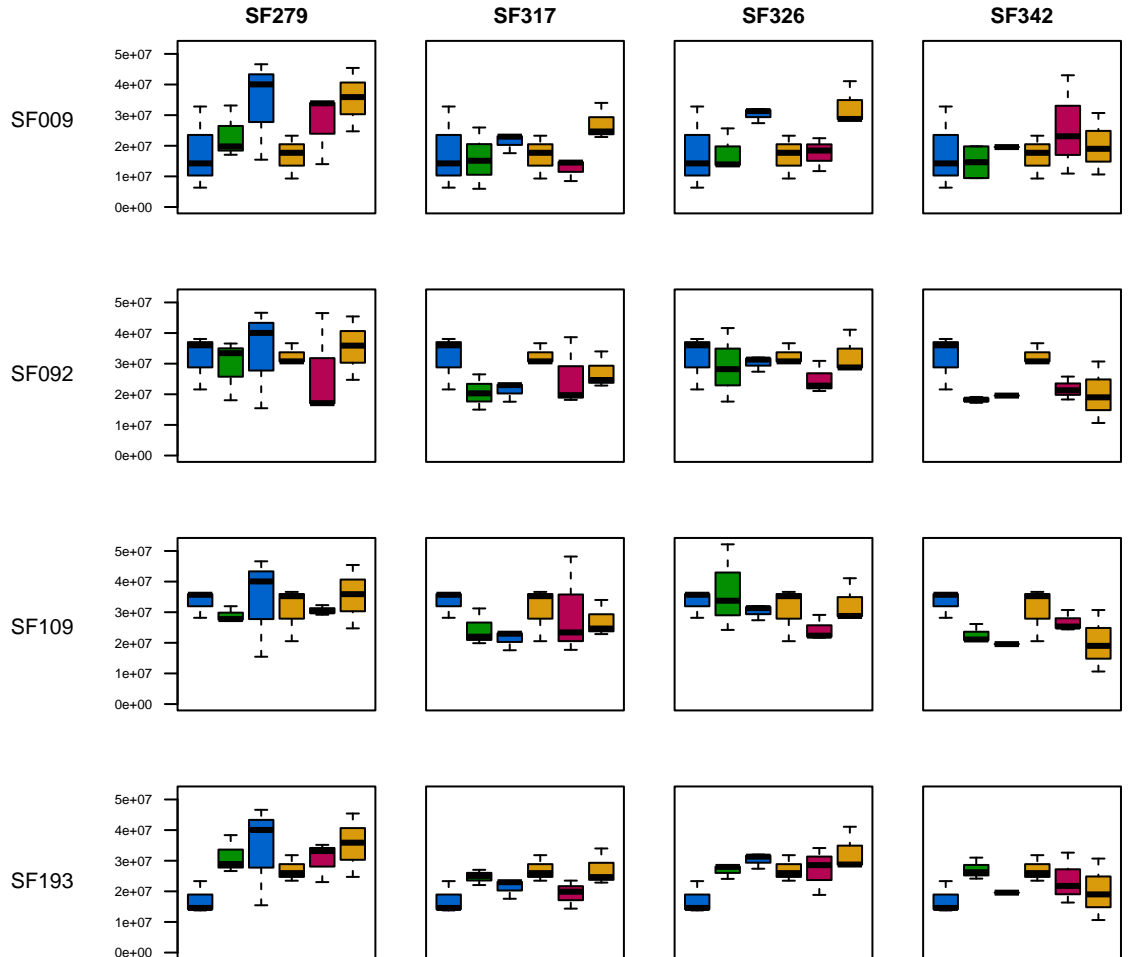

HanXRQChr06g0171391  
Probable ketol-acid reductoisomerase

Parents WW  
Parents WD  
Hybrids WW  
Hybrids WD

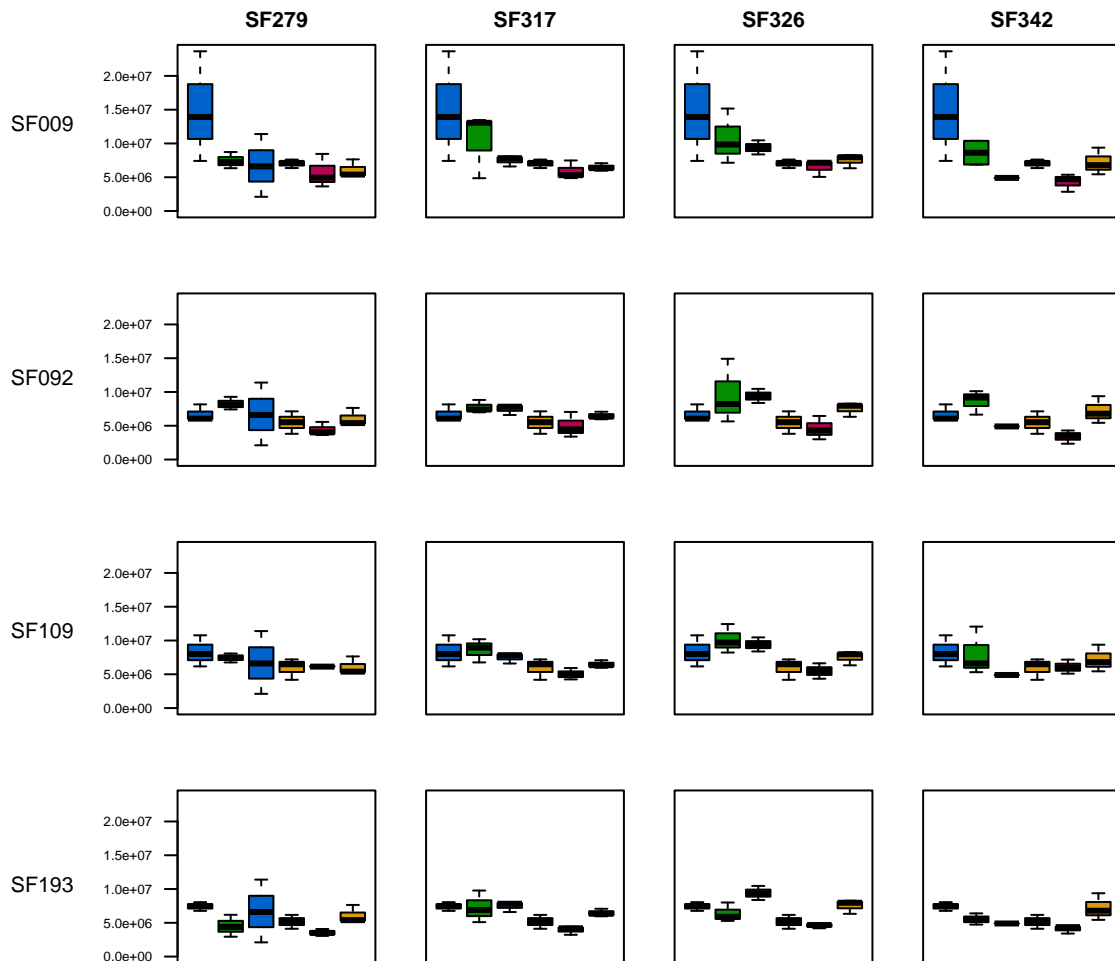

HanXRQChr09g0251791  
Putative clathrin, heavy chain

Parents WW  
Parents WD  
Hybrids WW  
Hybrids WD

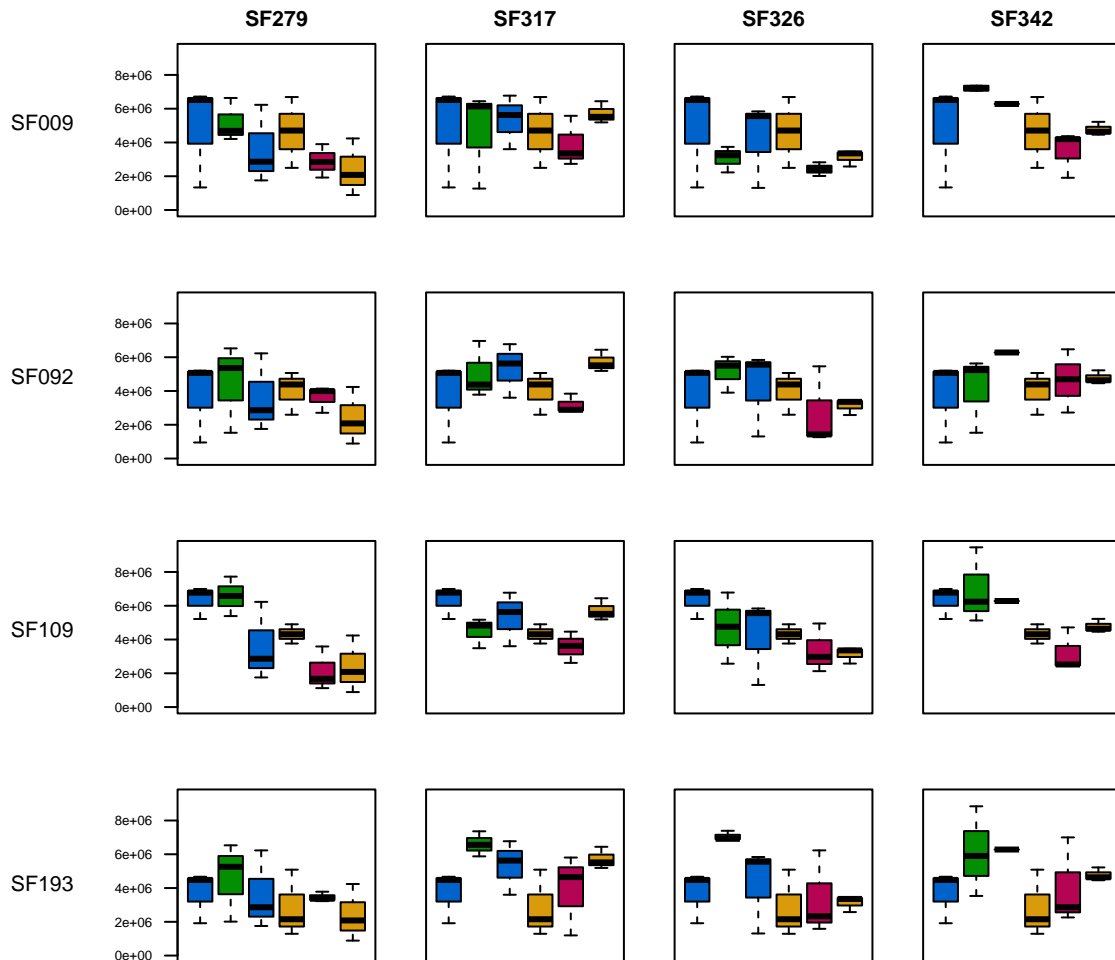

HanXRQChr04g0096541  
Putative coatomer beta' subunit (COPB2)

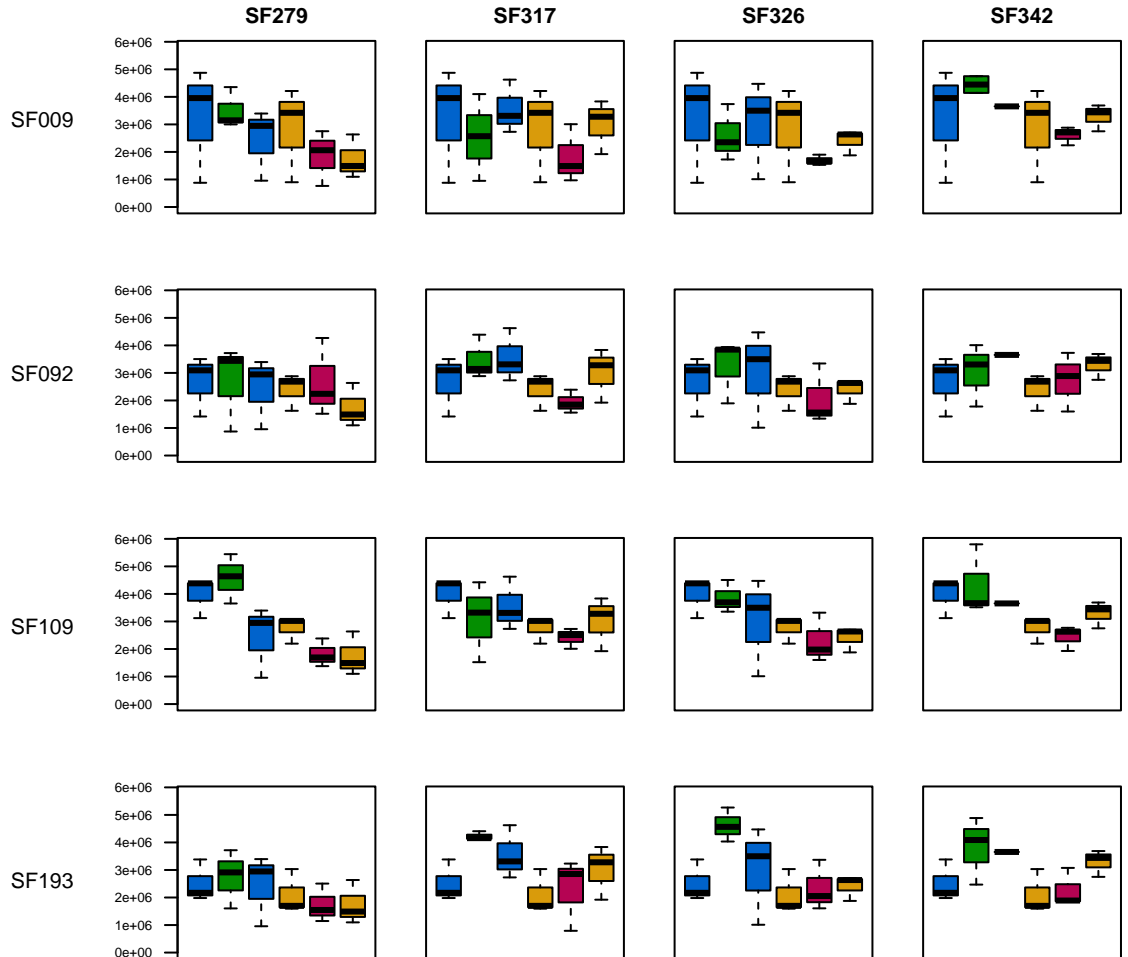

HanXRQChr14g0432921  
 Probable sulfite reductase 1  
 [ferredoxin], chloroplastic

Parents WW  
 Parents WD  
 Hybrids WW  
 Hybrids WD

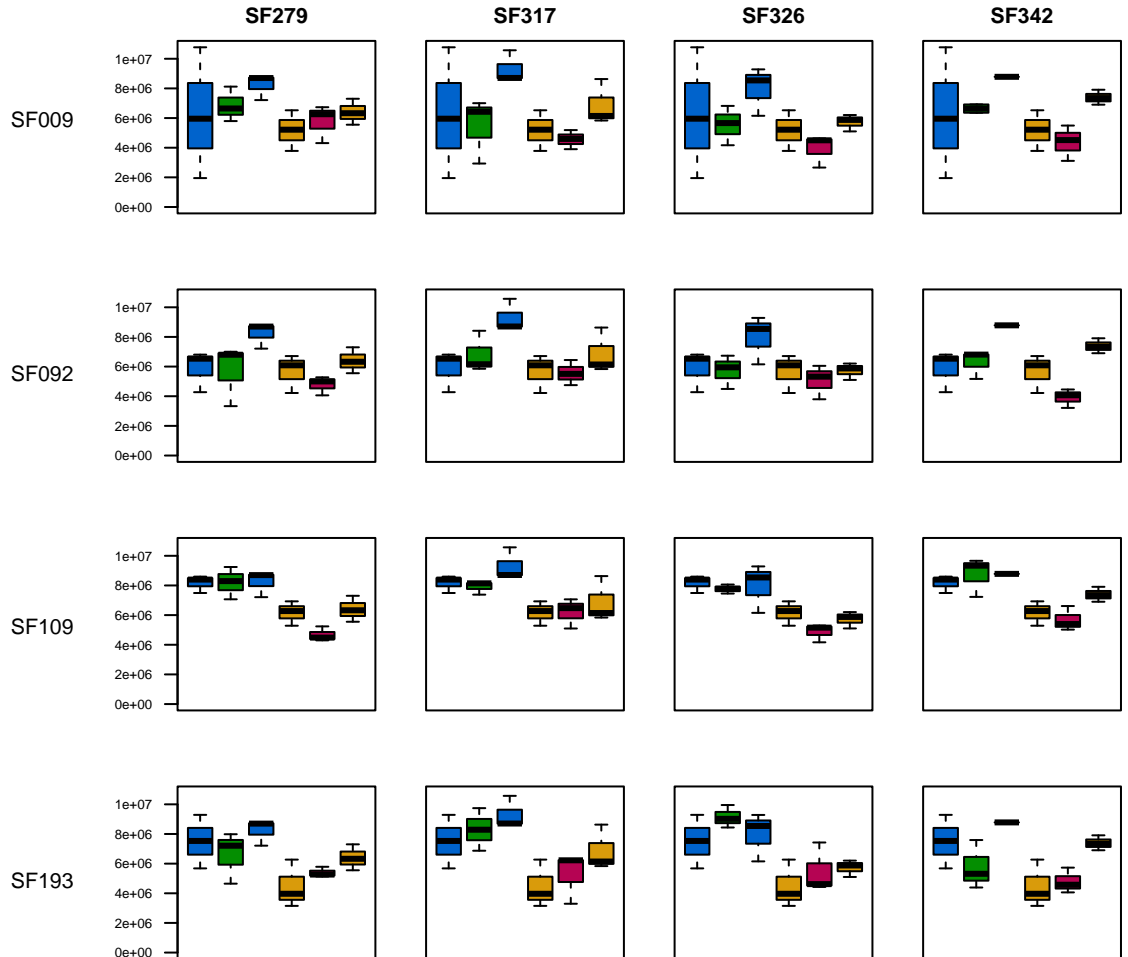



HanXRQChr14g0451701  
 Probable NAD(P)-linked oxidoreductase  
 superfamily protein

Parents WW  
 Parents WD  
 Hybrids WW  
 Hybrids WD

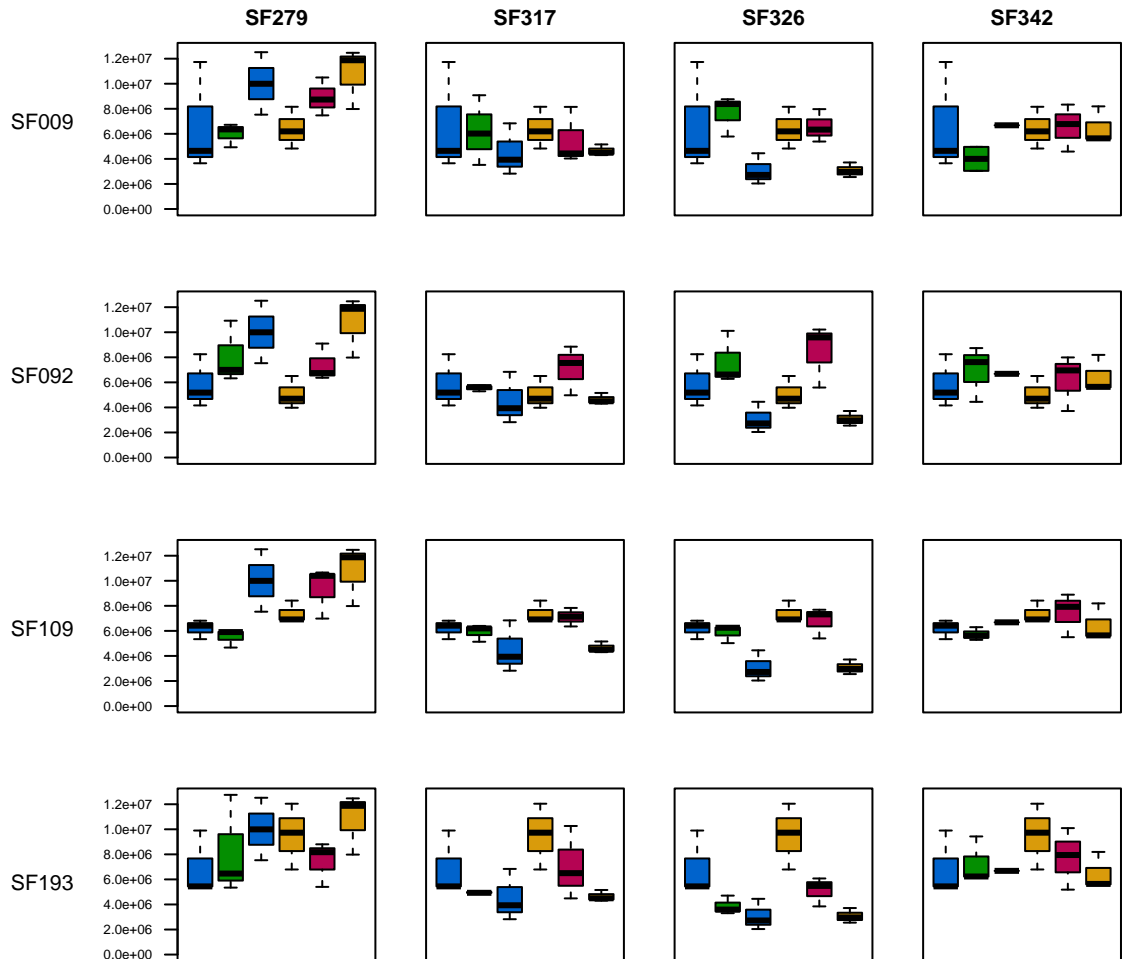

HanXRQChr03g0089201  
Putative plant lipid transfer  
protein/Par allergen; Bifunctional inhibitor/pl

Parents WW  
Parents WD  
Hybrids WW  
Hybrids WD

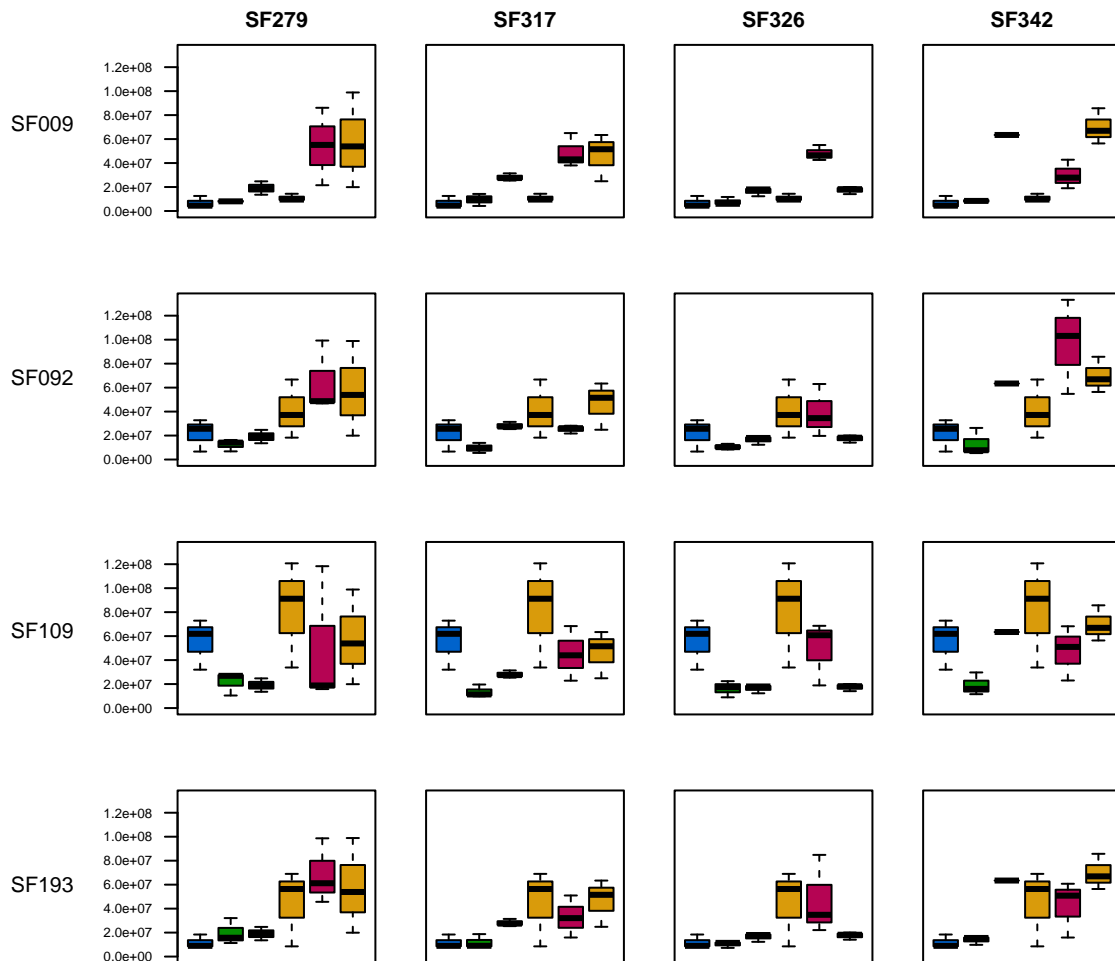

HanXRQChr17g0570251  
Probable spermidine synthase 1

Parents WW  
Parents WD  
Hybrids WW  
Hybrids WD

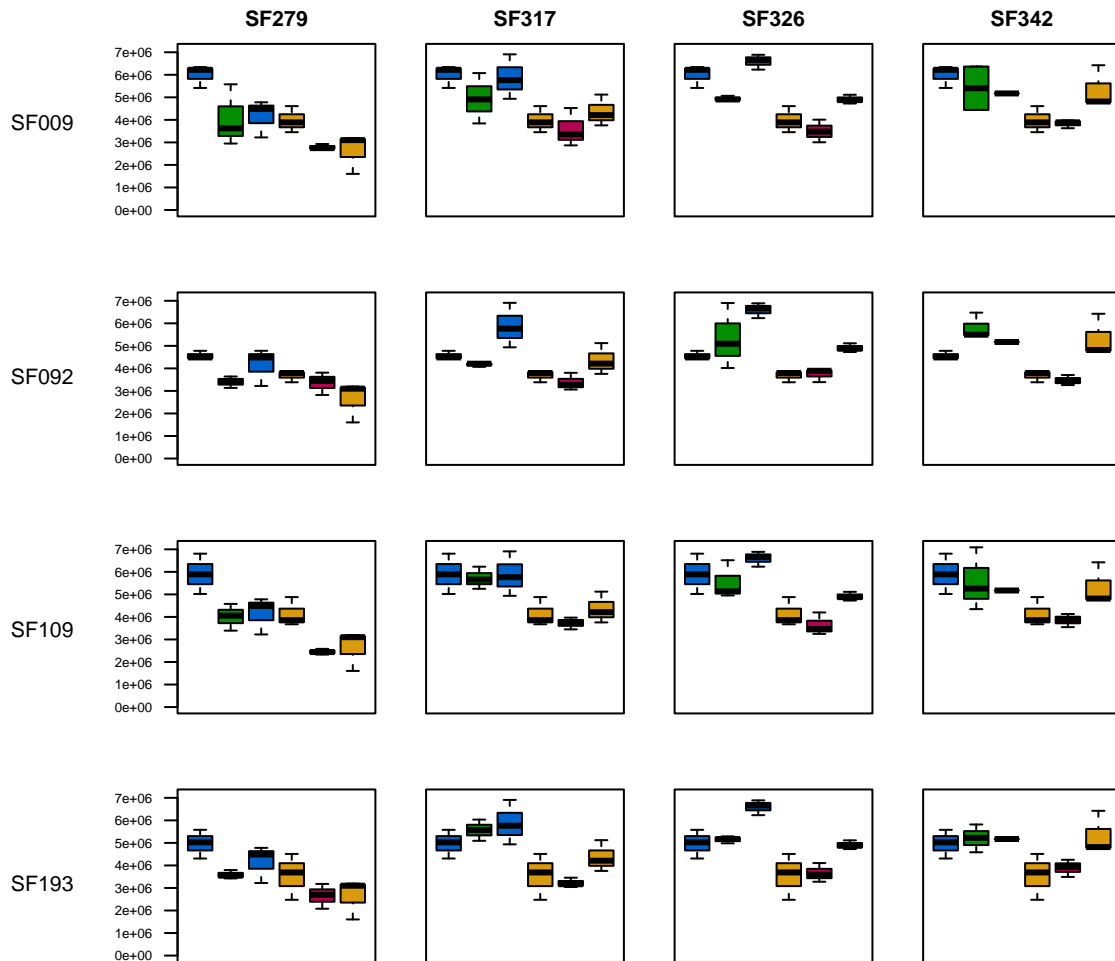

HanXRQChr02g0051941  
Putative ribosomal protein S12/S23

- Parents WW
- Parents WD
- Hybrids WW
- Hybrids WD

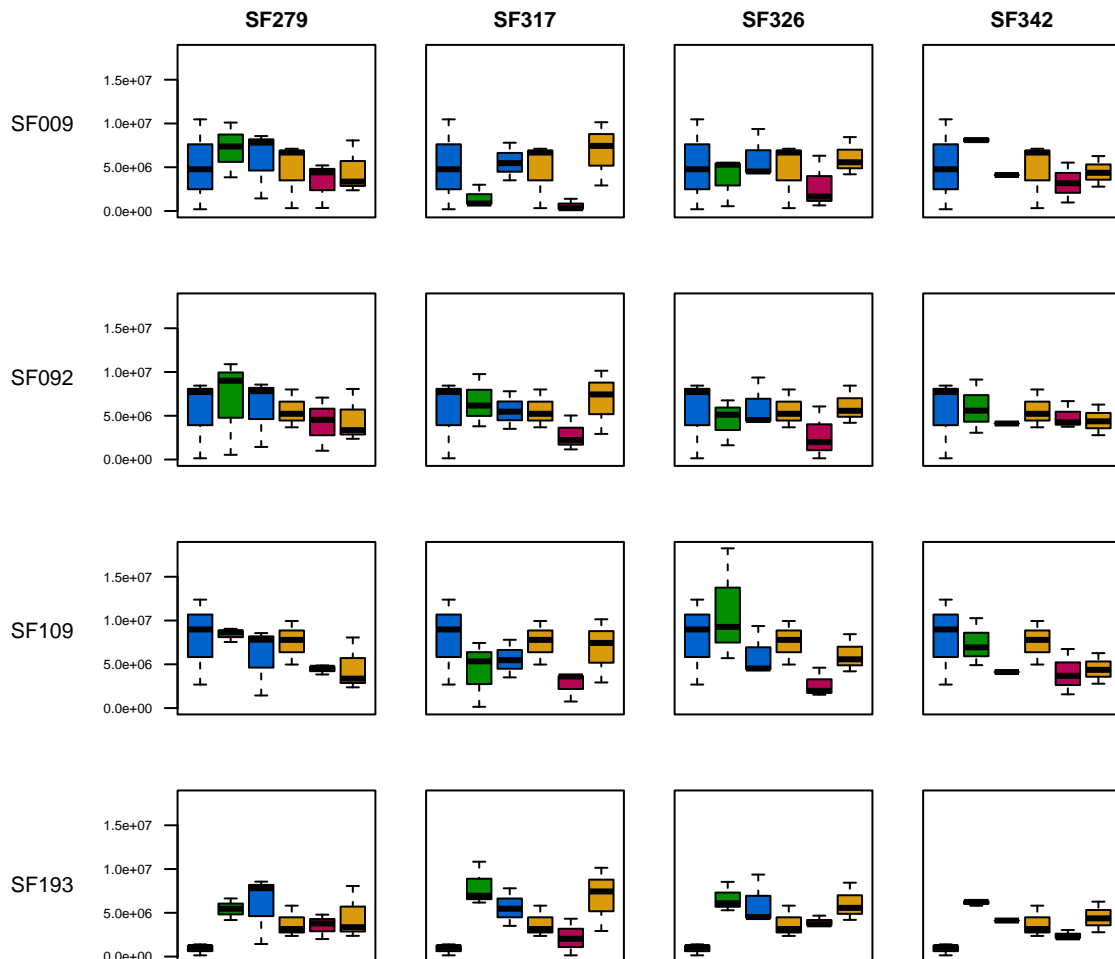

HanXRQChr16g0510281  
 Probable tautomerase/MIF superfamily  
 protein

Parents WW  
 Parents WD  
 Hybrids WW  
 Hybrids WD

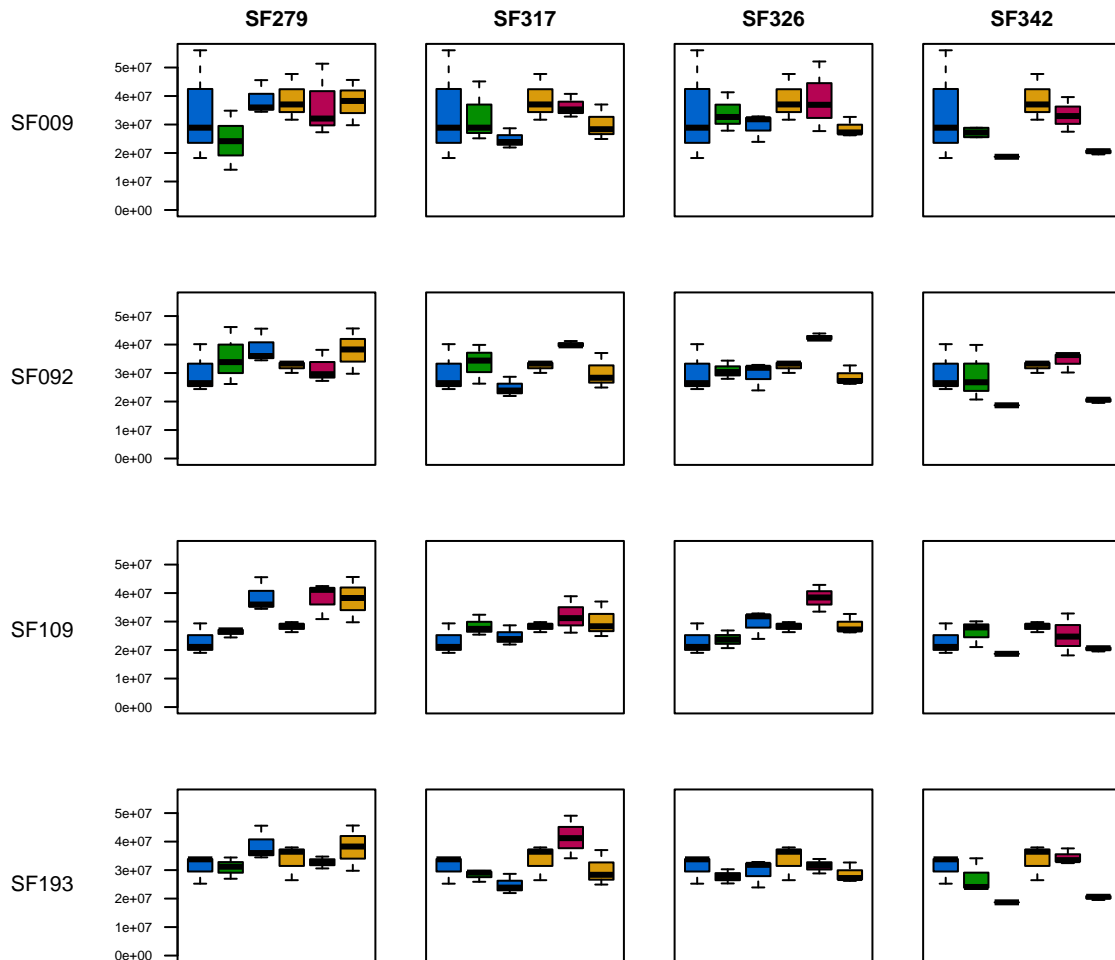

HanXRQChr01g0001041  
Probable ribosomal protein L18e/L15  
superfamily protein

Parents WW  
Parents WD  
Hybrids WW  
Hybrids WD

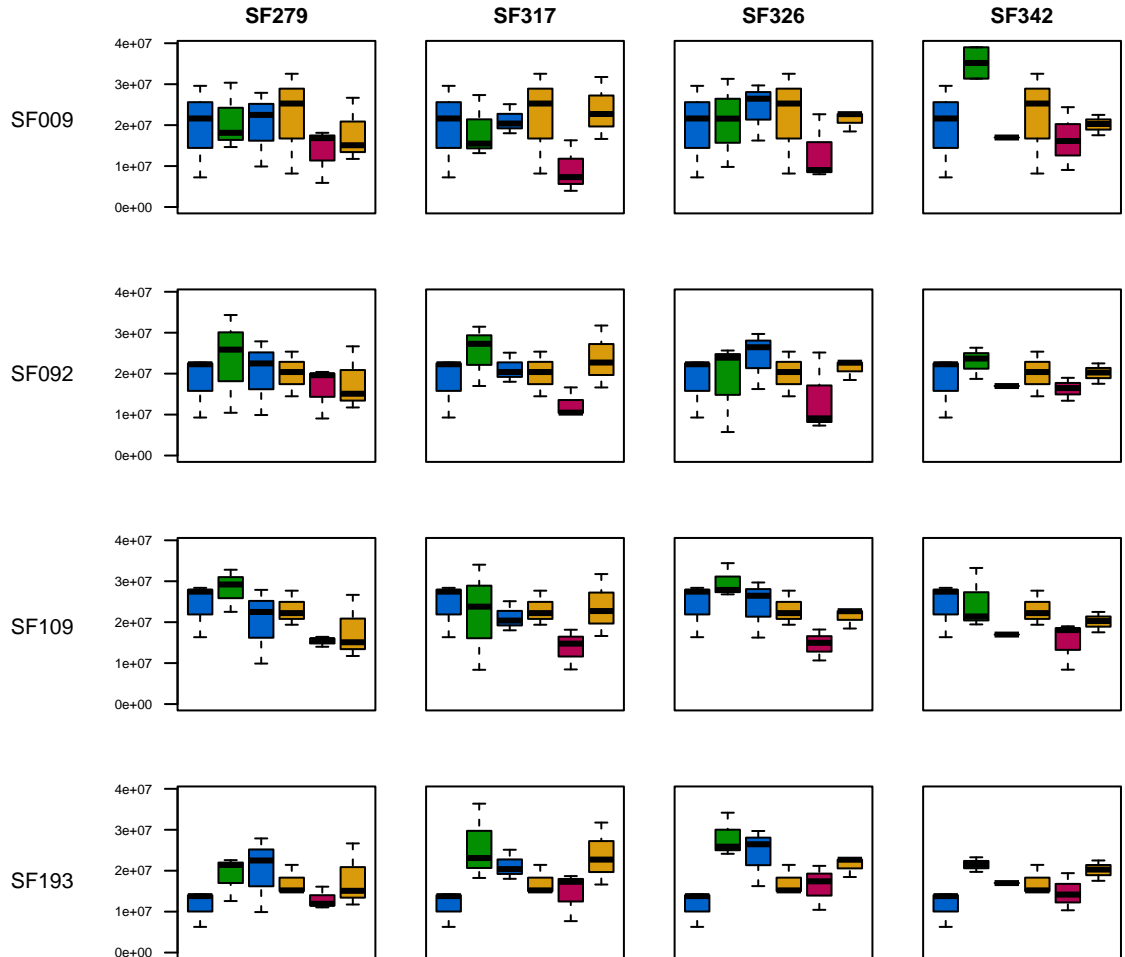

HanXRQChr09g0267241  
 Probable HSP20-like chaperones  
 superfamily protein

Parents WW  
 Parents WD  
 Hybrids WW  
 Hybrids WD

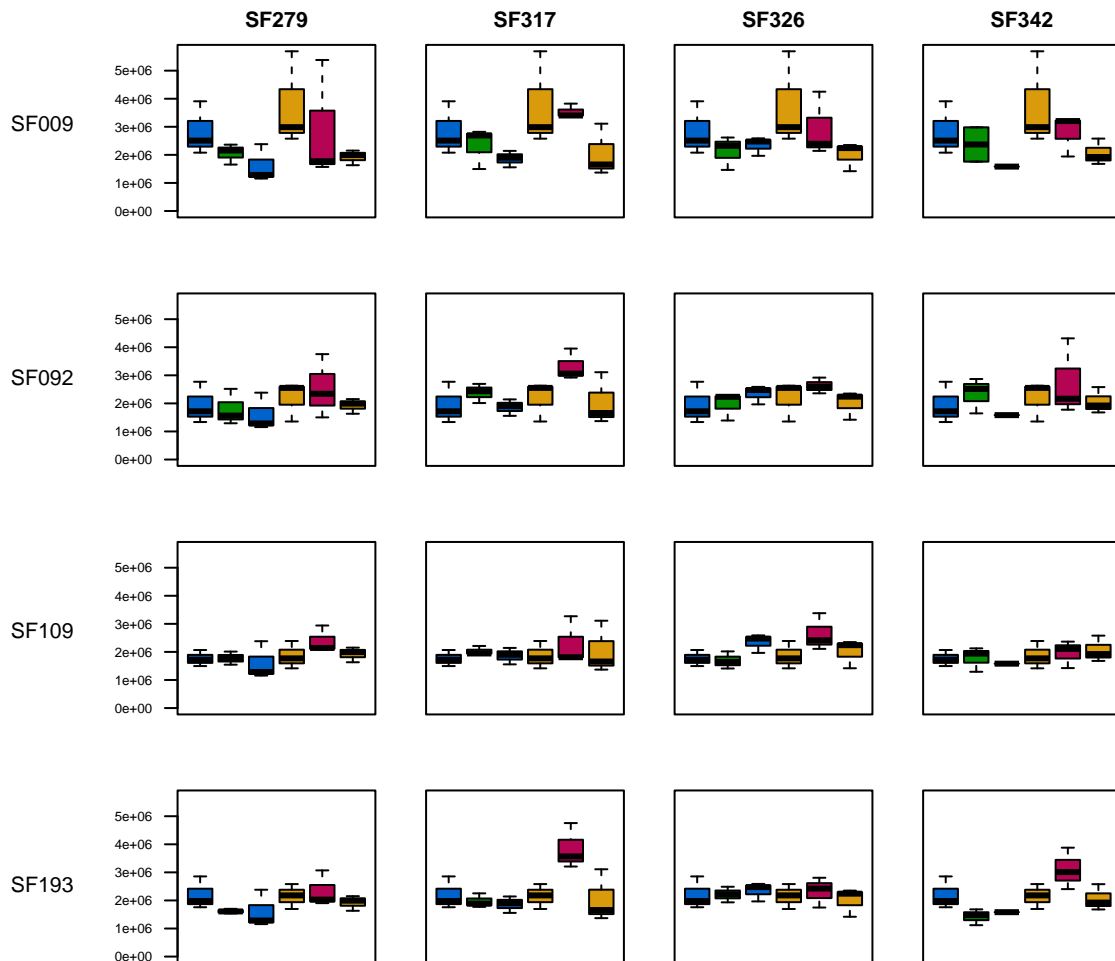

HanXRQChr10g0293711  
 Putative glyoxylate carboligase;  
 Thiamine pyrophosphate (TPP)–dependent

Parents WW  
 Parents WD  
 Hybrids WW  
 Hybrids WD

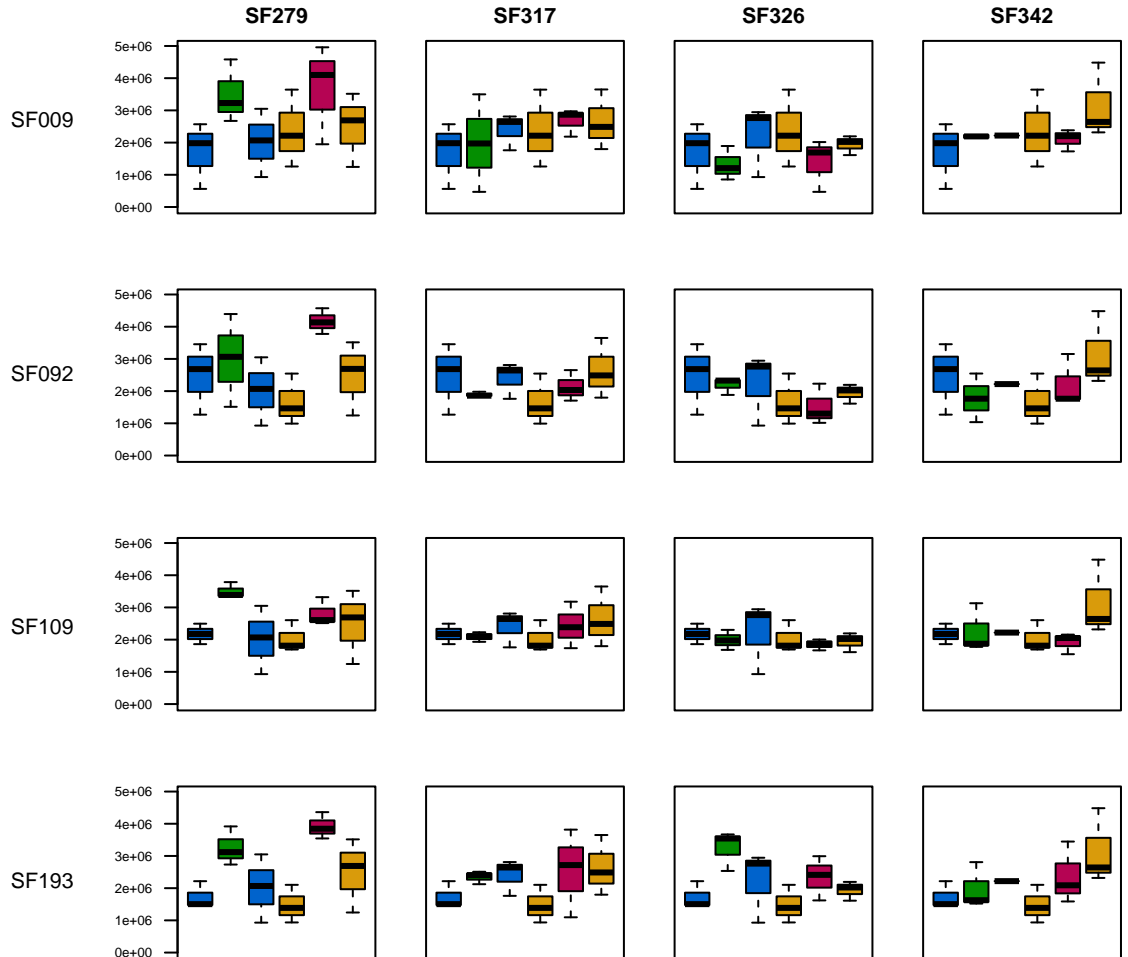



HanXRQChr17g0561841  
Putative nucleic acid-binding, OB-fold

Parents WW  
Parents WD  
Hybrids WW  
Hybrids WD

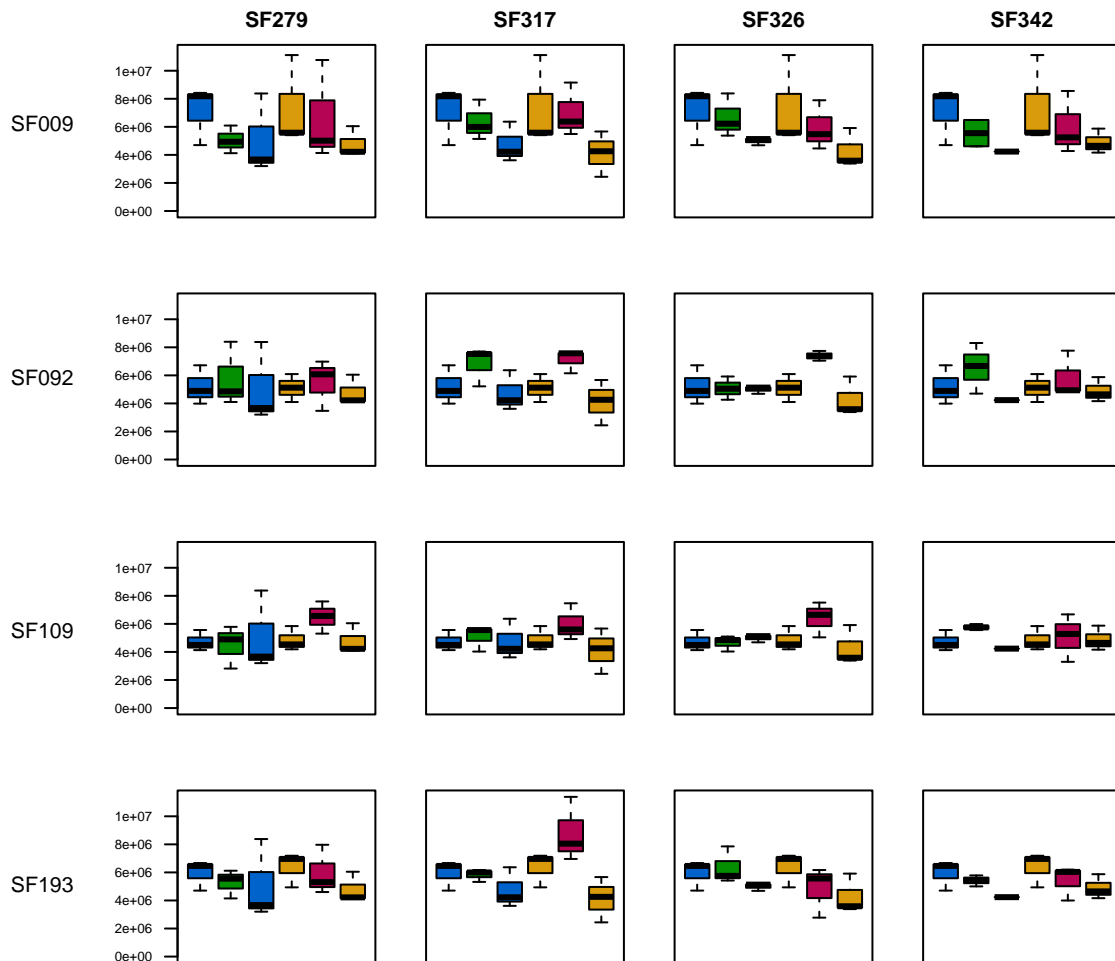

HanXRQChr10g0309931  
Putative glycoside hydrolase, family  
19; Lysozyme-like domain

Parents WW  
Parents WD  
Hybrids WW  
Hybrids WD

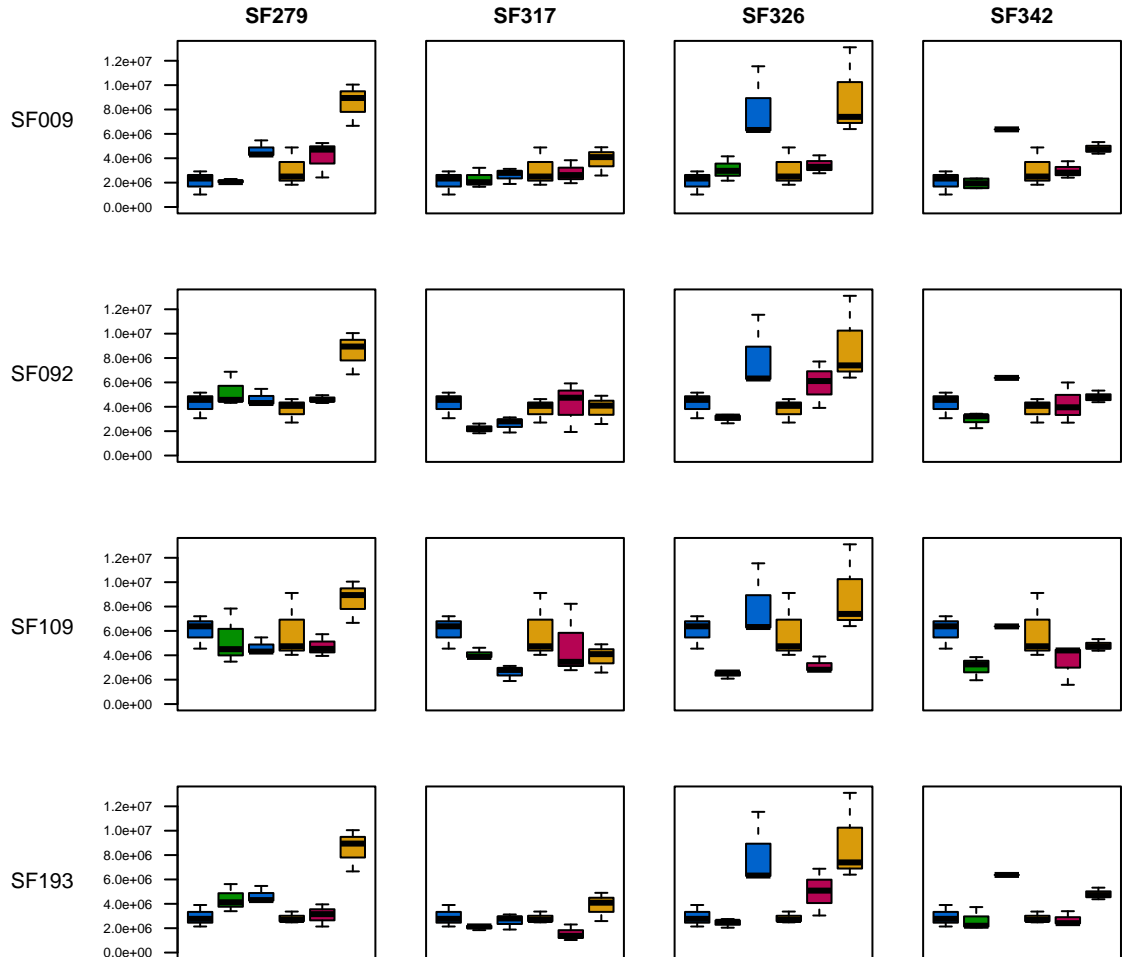

HanXRQChr11g0339101  
Uncharacterized protein, supported by  
expression data

Parents WW  
Parents WD  
Hybrids WW  
Hybrids WD

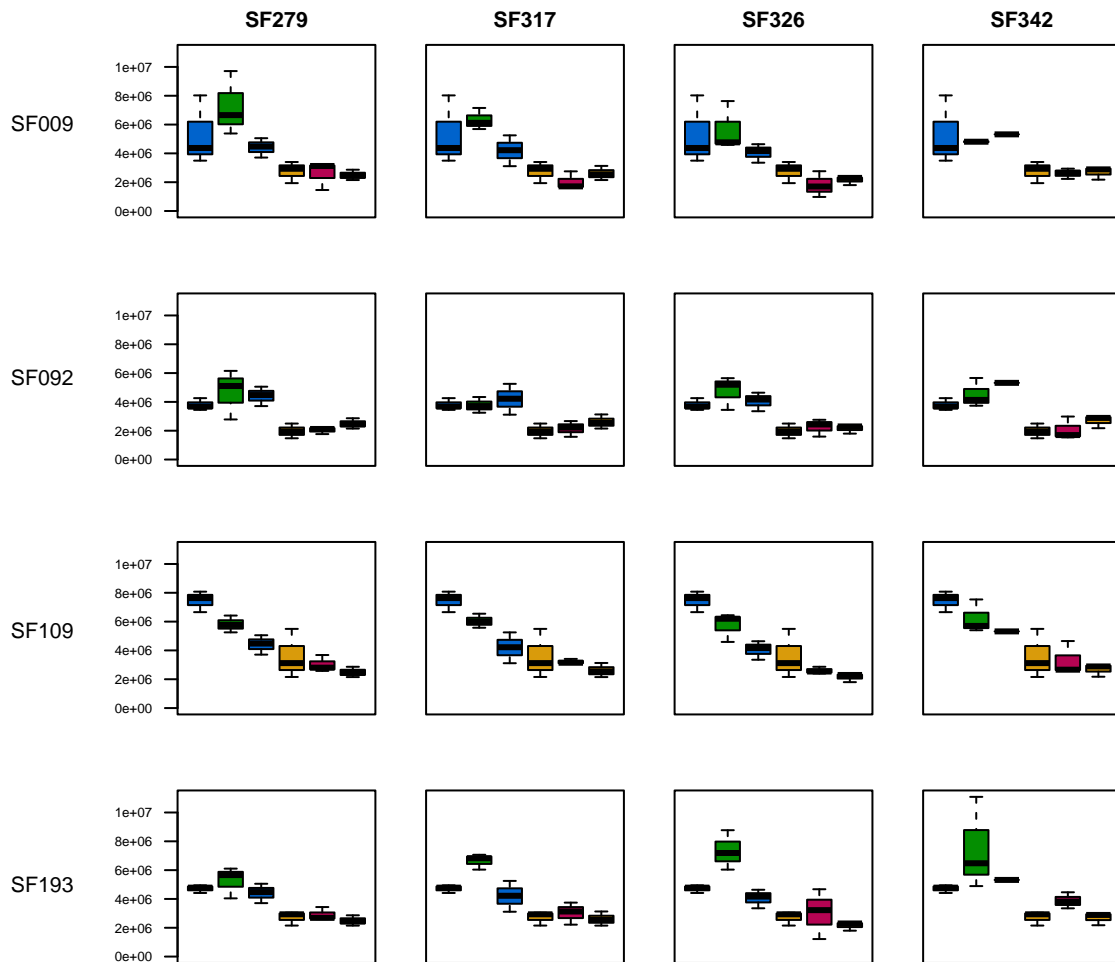

HanXRQChr03g0087011  
Probable B-S glucosidase 44

- Parents WW
- Parents WD
- Hybrids WW
- Hybrids WD

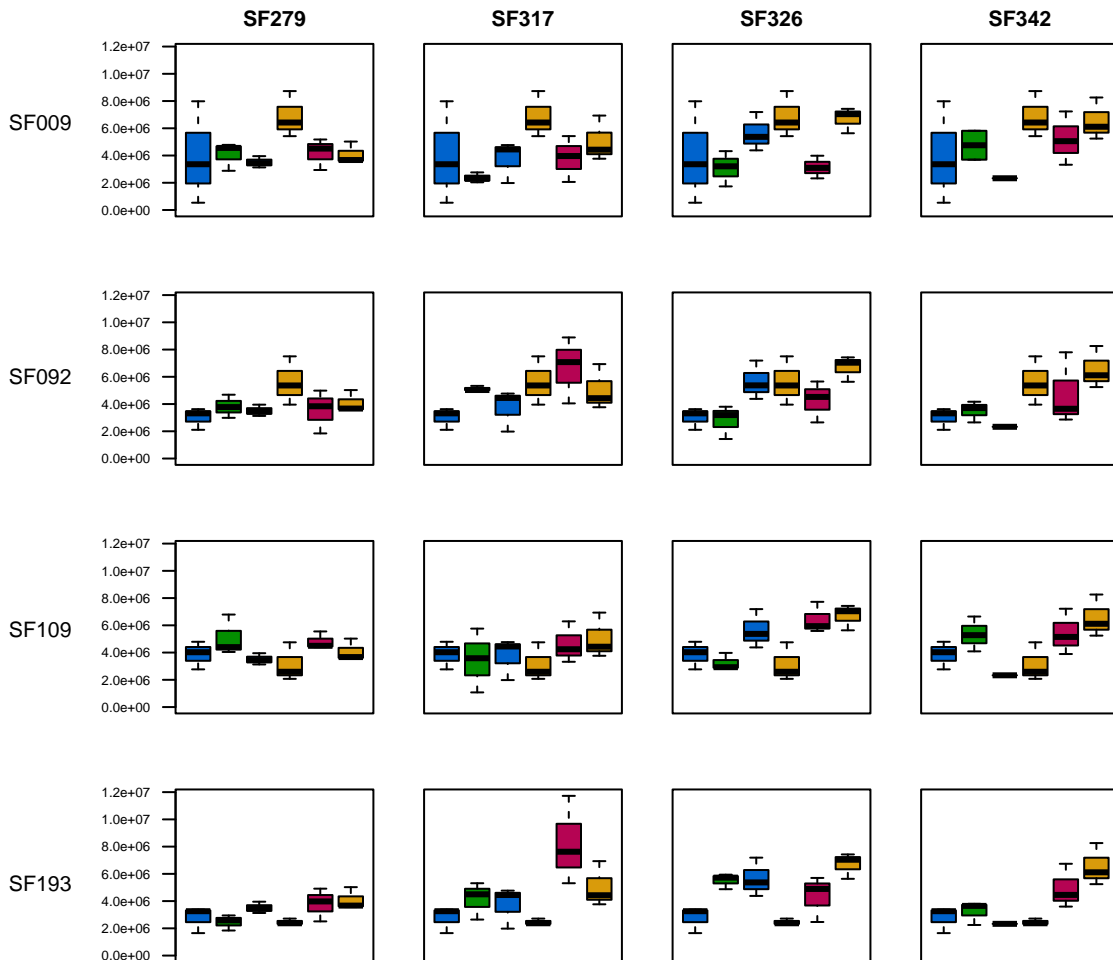

HanXRQChr01g0007731  
Probable hydroxymethylbilane synthase

- Parents WW
- Parents WD
- Hybrids WW
- Hybrids WD

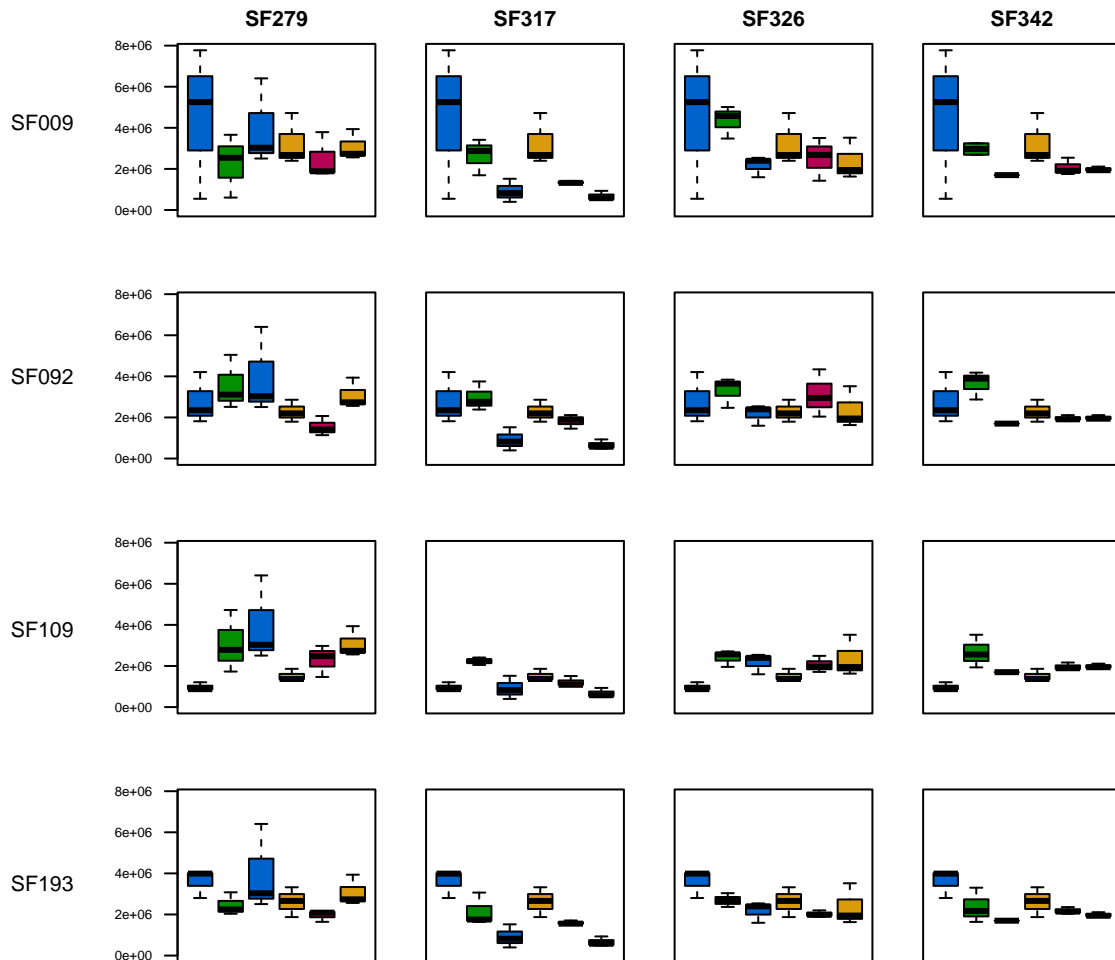

HanXRQChr16g0499601  
Putative light regulated Lir1

- Parents WW
- Parents WD
- Hybrids WW
- Hybrids WD

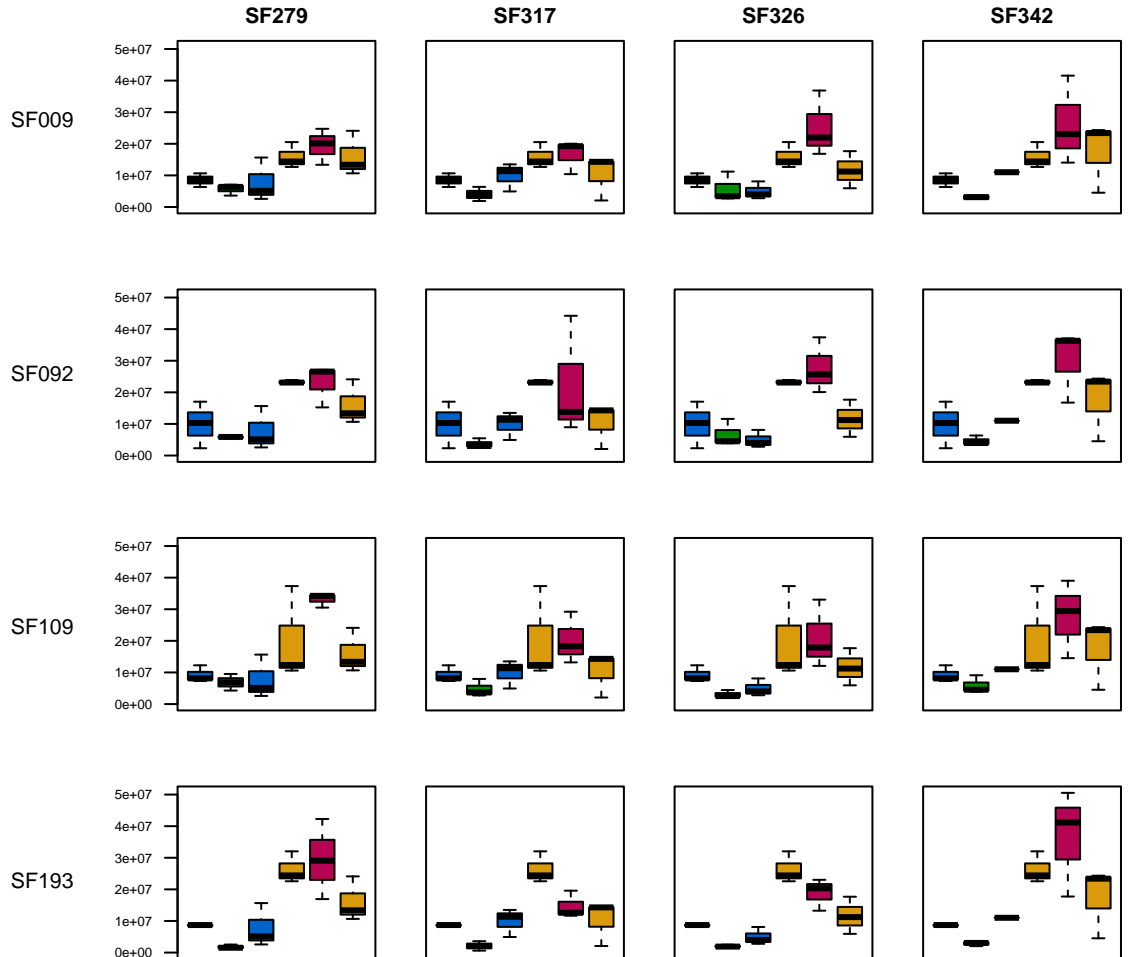

HanXRQChr10g0315501  
Putative protein of unknown function  
DUF3119

Parents WW  
Parents WD  
Hybrids WW  
Hybrids WD

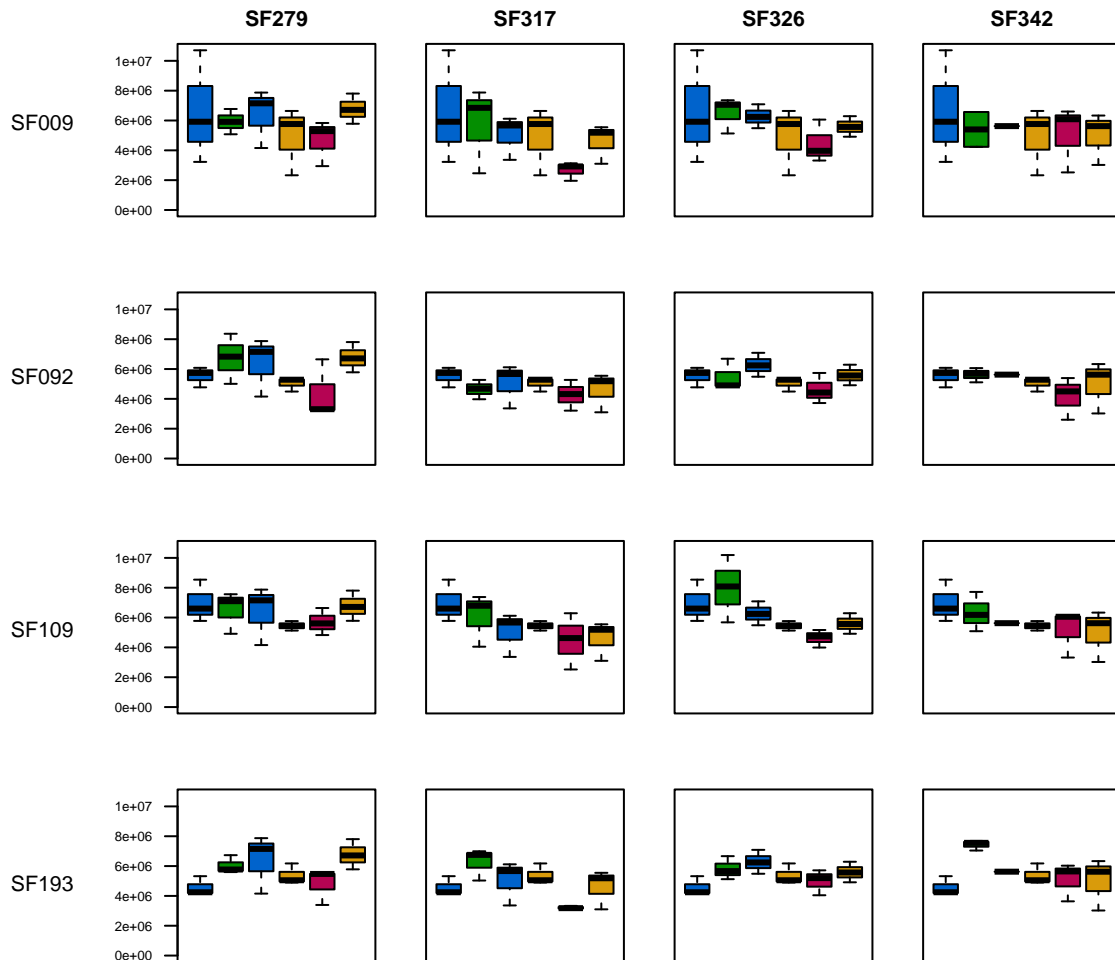

HanXRQChr09g0267121  
 Probable granulin repeat cysteine  
 protease family protein

Parents WW  
 Parents WD  
 Hybrids WW  
 Hybrids WD

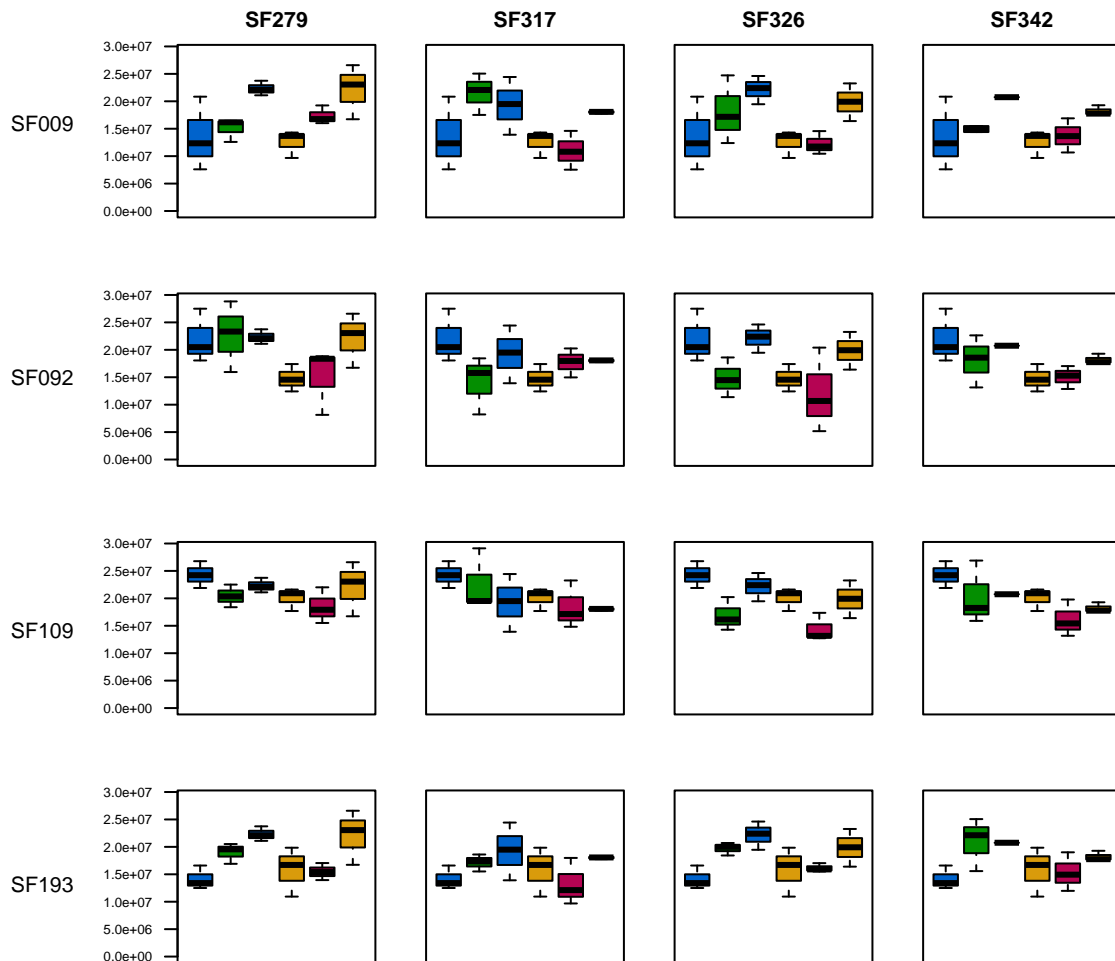



HanXRQChr14g0460151  
Putative 30S ribosomal protein

- Parents WW
- Parents WD
- Hybrids WW
- Hybrids WD

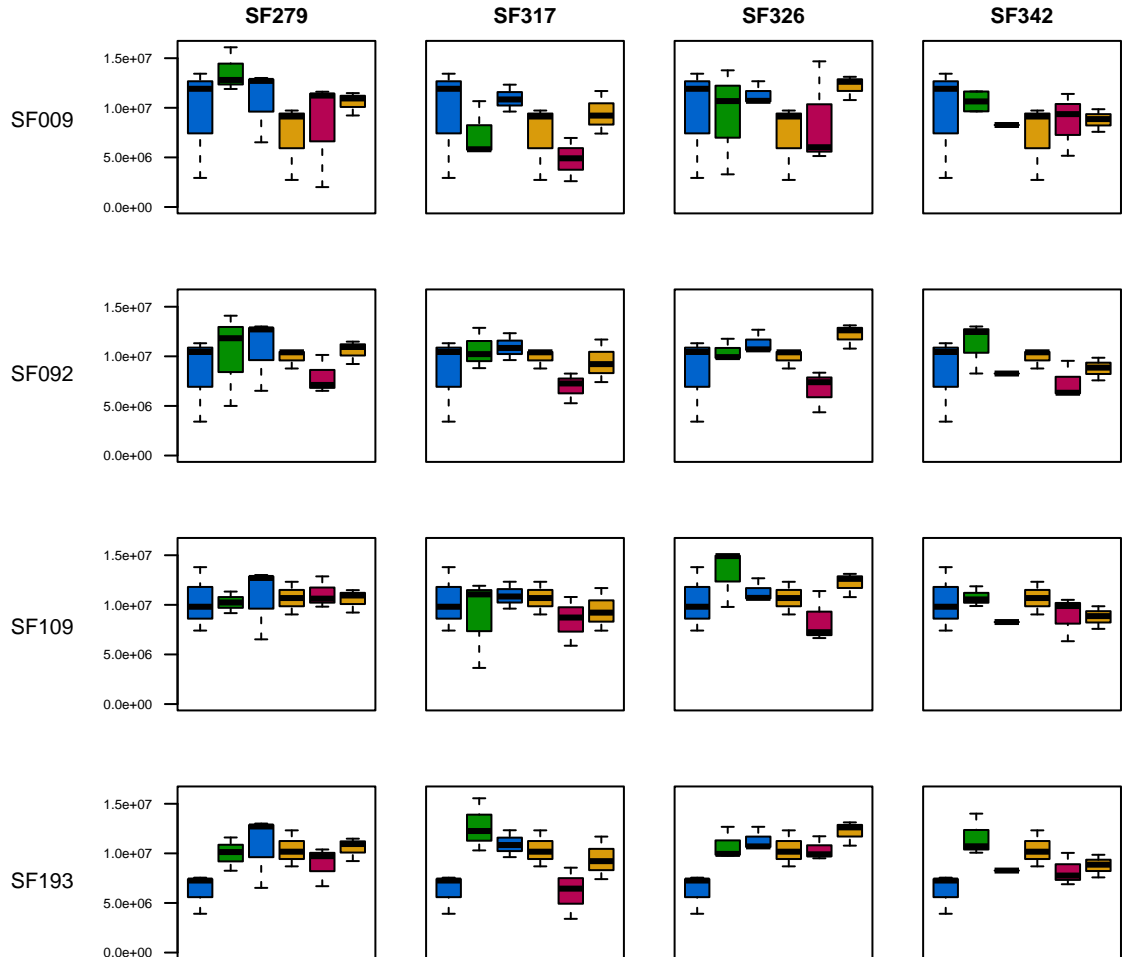

HanXRQChr17g0558841  
Probable light-induced protein,  
chloroplastic

Parents WW  
Parents WD  
Hybrids WW  
Hybrids WD

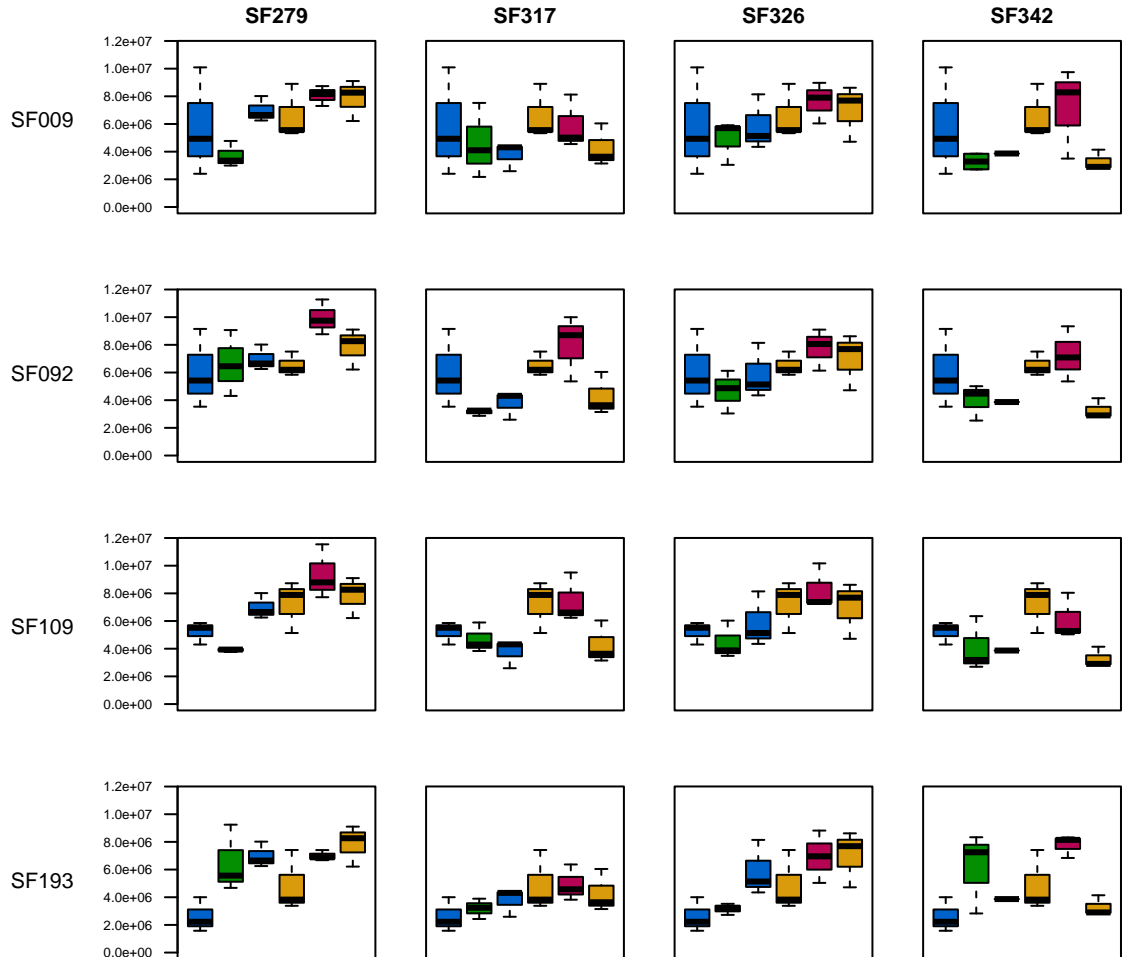

HanXRQChr04g0106031  
Putative hyaluronan/mRNA-binding  
protein; Stm1, N-terminal

Parents WW  
Parents WD  
Hybrids WW  
Hybrids WD

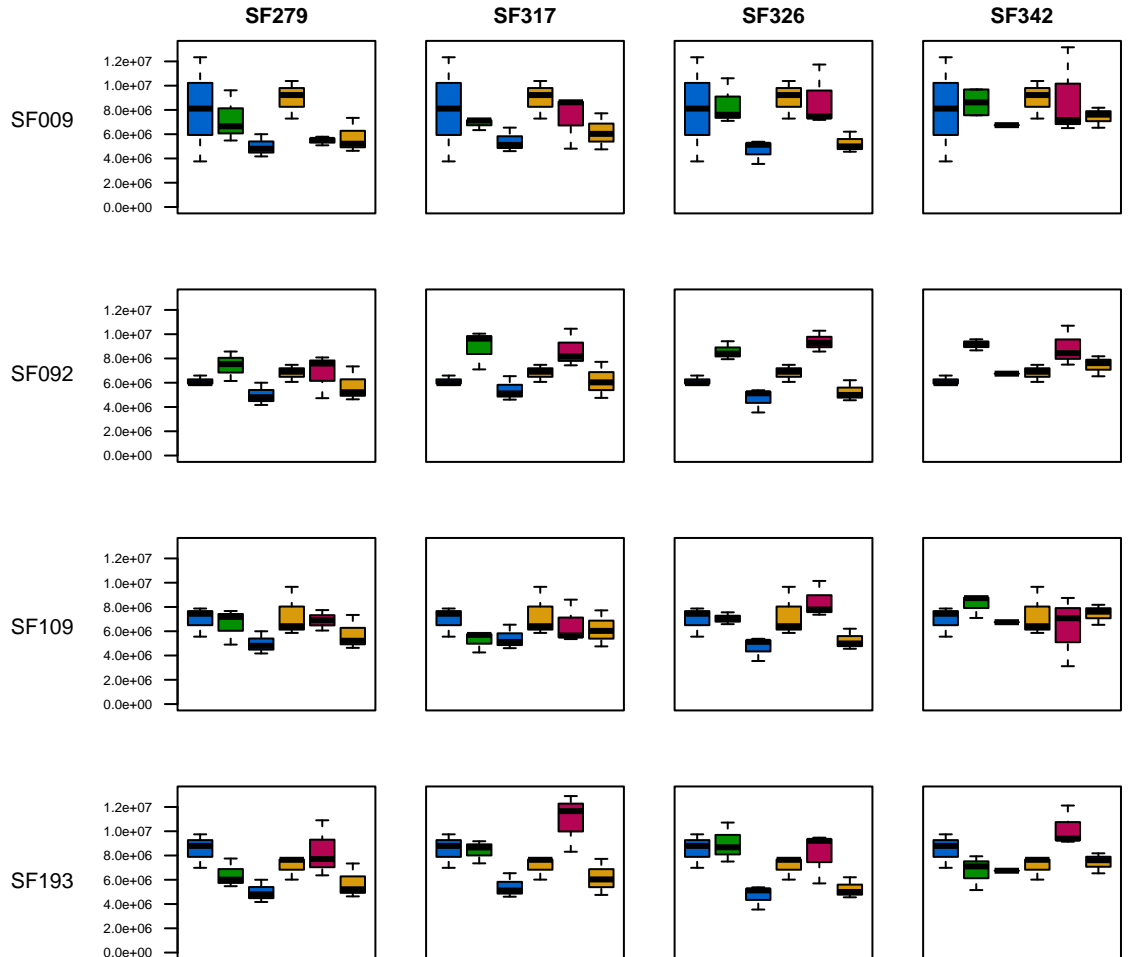

HanXRQChr09g0247561  
 Probable eukaryotic aspartyl protease  
 family protein

Parents WW  
 Parents WD  
 Hybrids WW  
 Hybrids WD

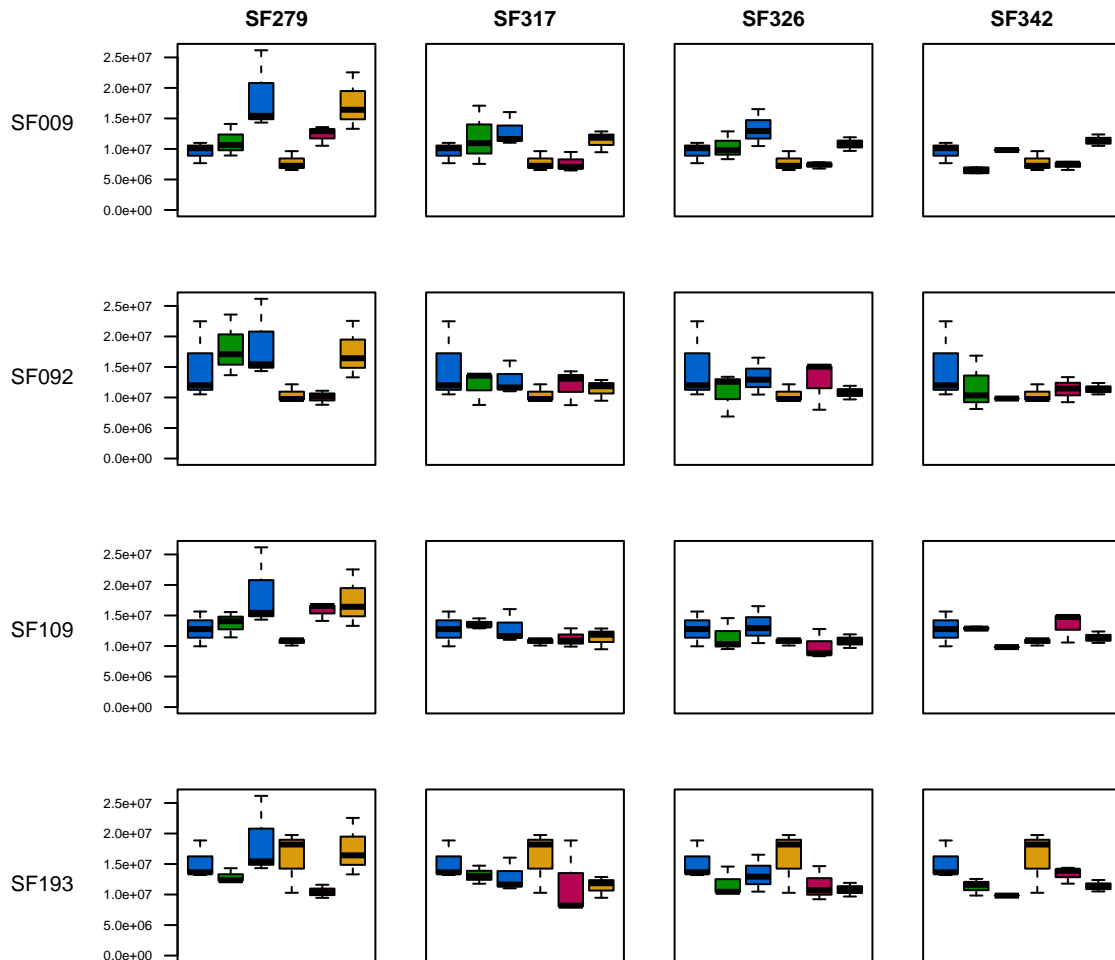

HanXRQChr13g0394591  
Putative major intrinsic protein;  
Aquaporin-like

Parents WW  
Parents WD  
Hybrids WW  
Hybrids WD

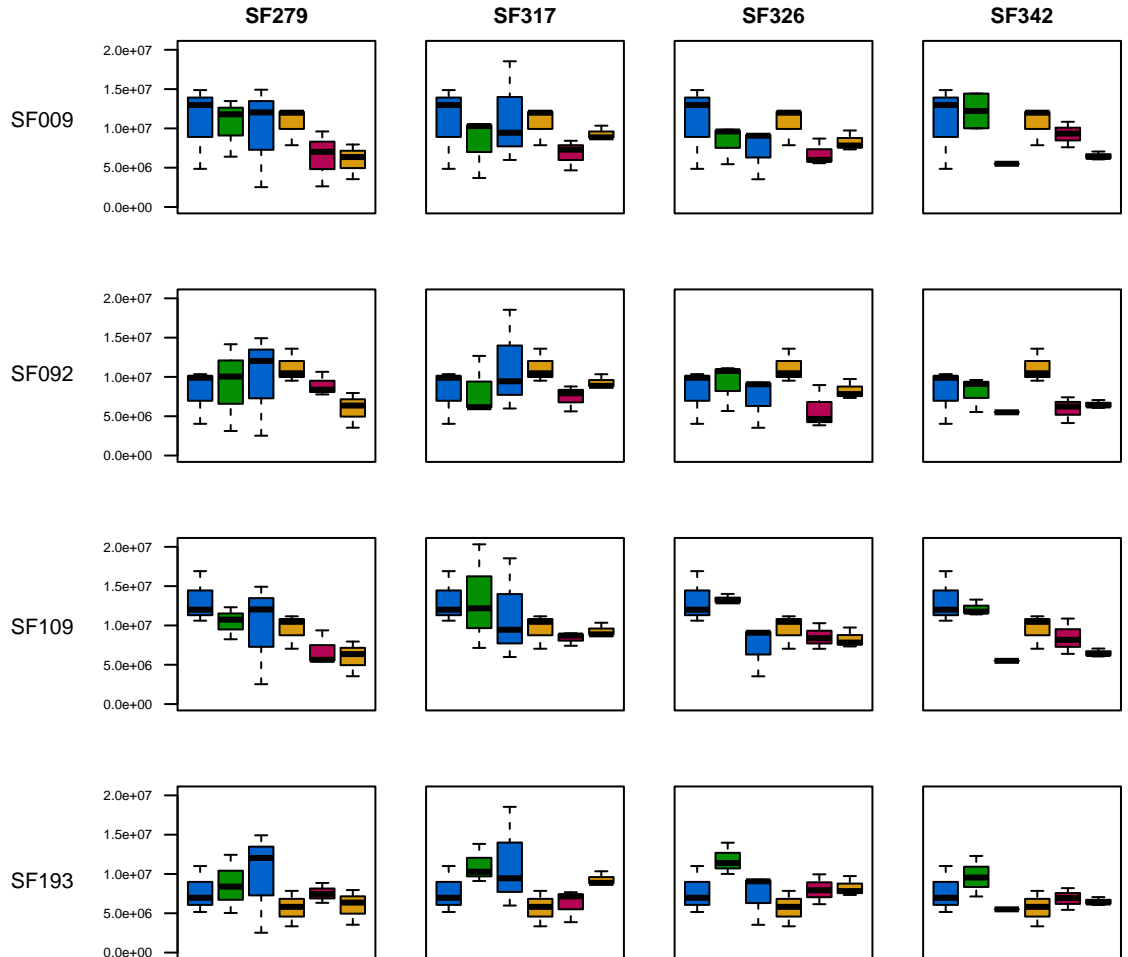

HanXRQChr08g0218131  
Putative pyruvate kinase; Pyruvate  
kinase, barrel

Parents WW  
Parents WD  
Hybrids WW  
Hybrids WD

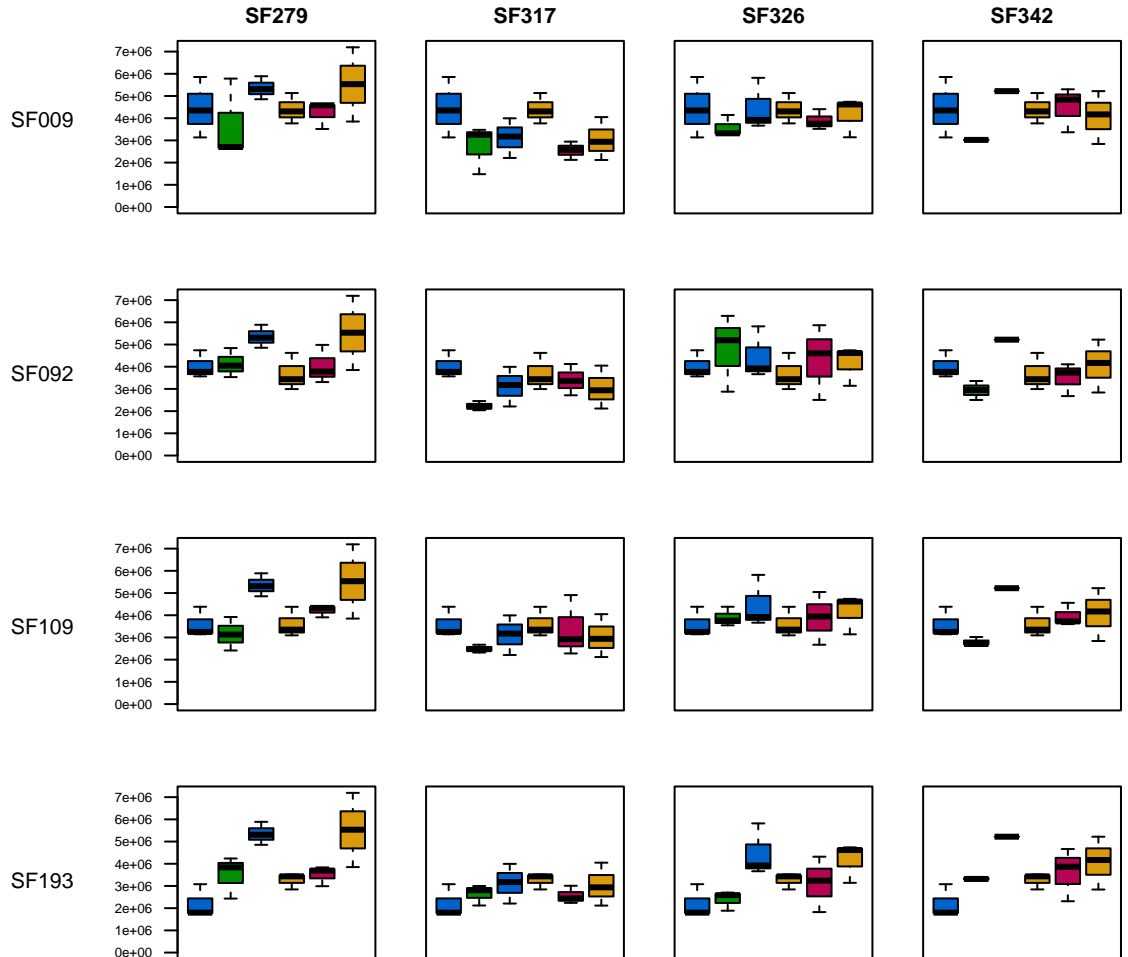

HanXRQChr01g0023041  
Probable isopropyl malate isomerase  
large subunit 1

Parents WW  
Parents WD  
Hybrids WW  
Hybrids WD

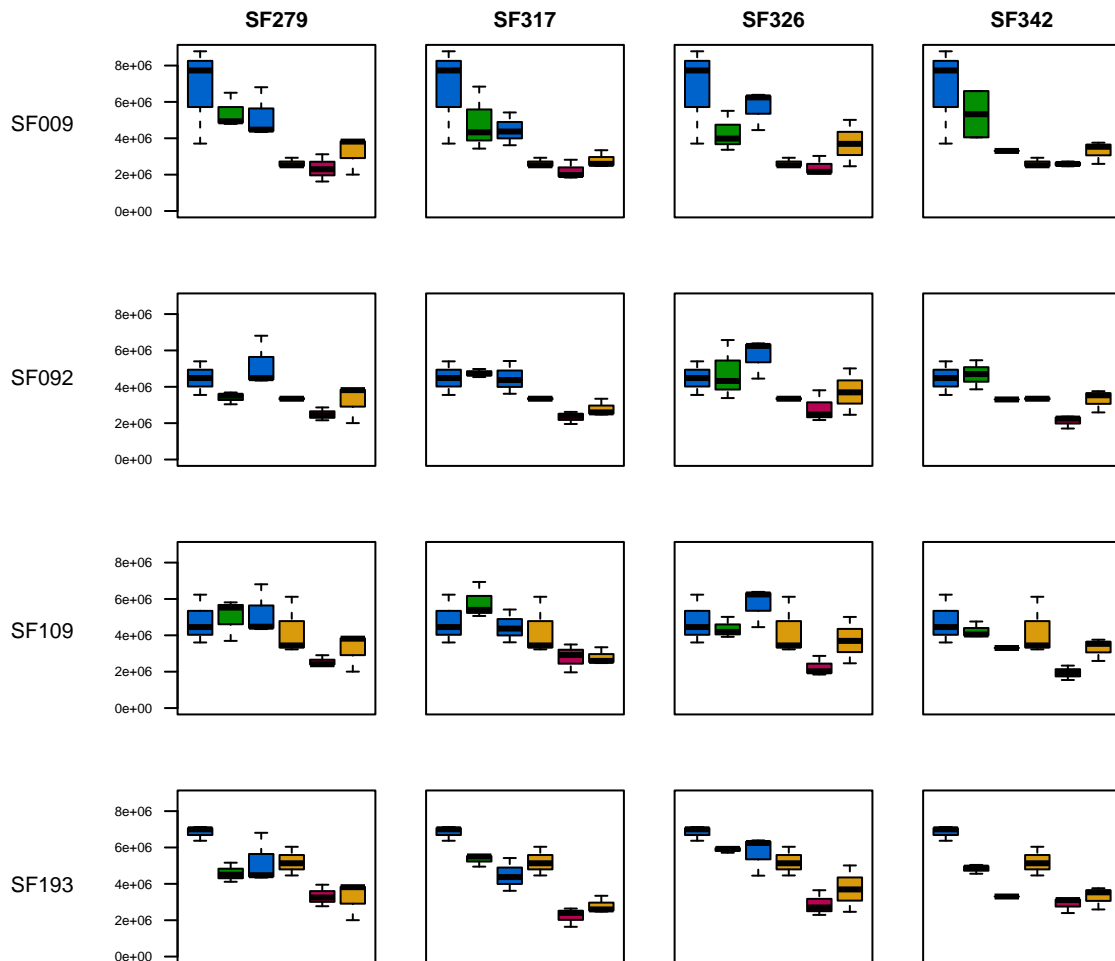

HanXRQChr14g0433721  
 Probable ferredoxin--NADP reductase,  
 root-type isozyme, chloroplastic

Parents WW  
 Parents WD  
 Hybrids WW  
 Hybrids WD

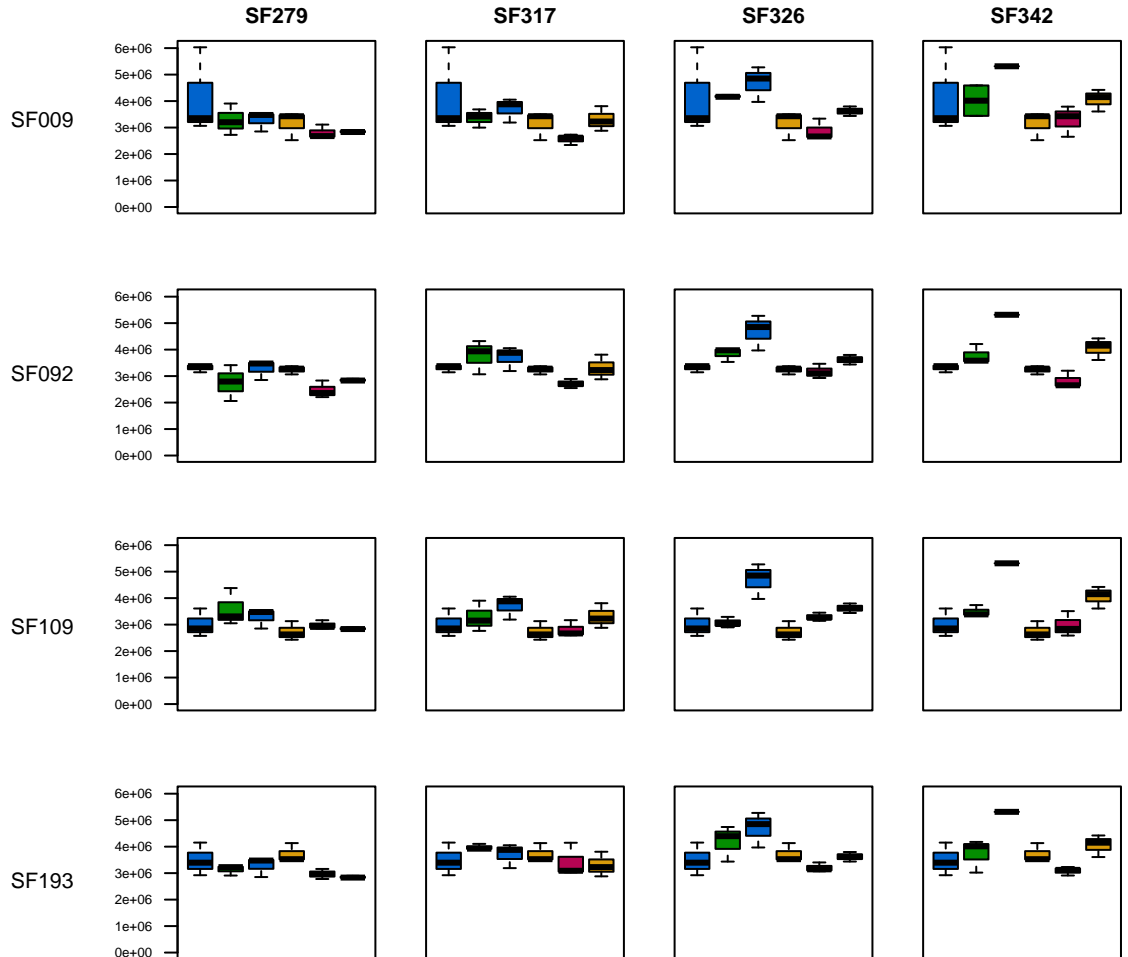



HanXRQChr11g0341771  
Probable LYR family of Fe/S cluster  
biogenesis protein

Parents WW  
Parents WD  
Hybrids WW  
Hybrids WD

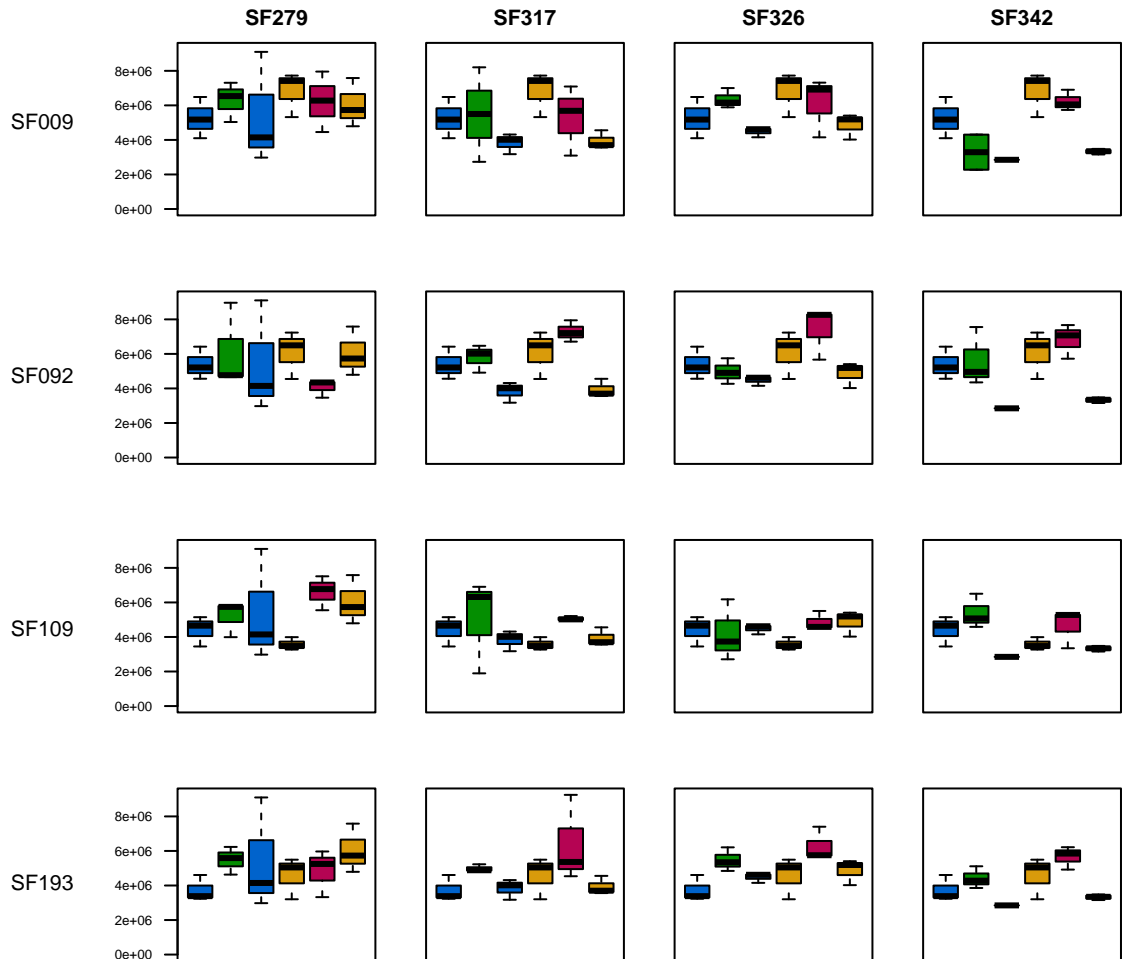

HanXRQChr05g0155971  
Probable geranylgeranyl diphosphate  
reductase, chloroplastic

Parents WW  
Parents WD  
Hybrids WW  
Hybrids WD

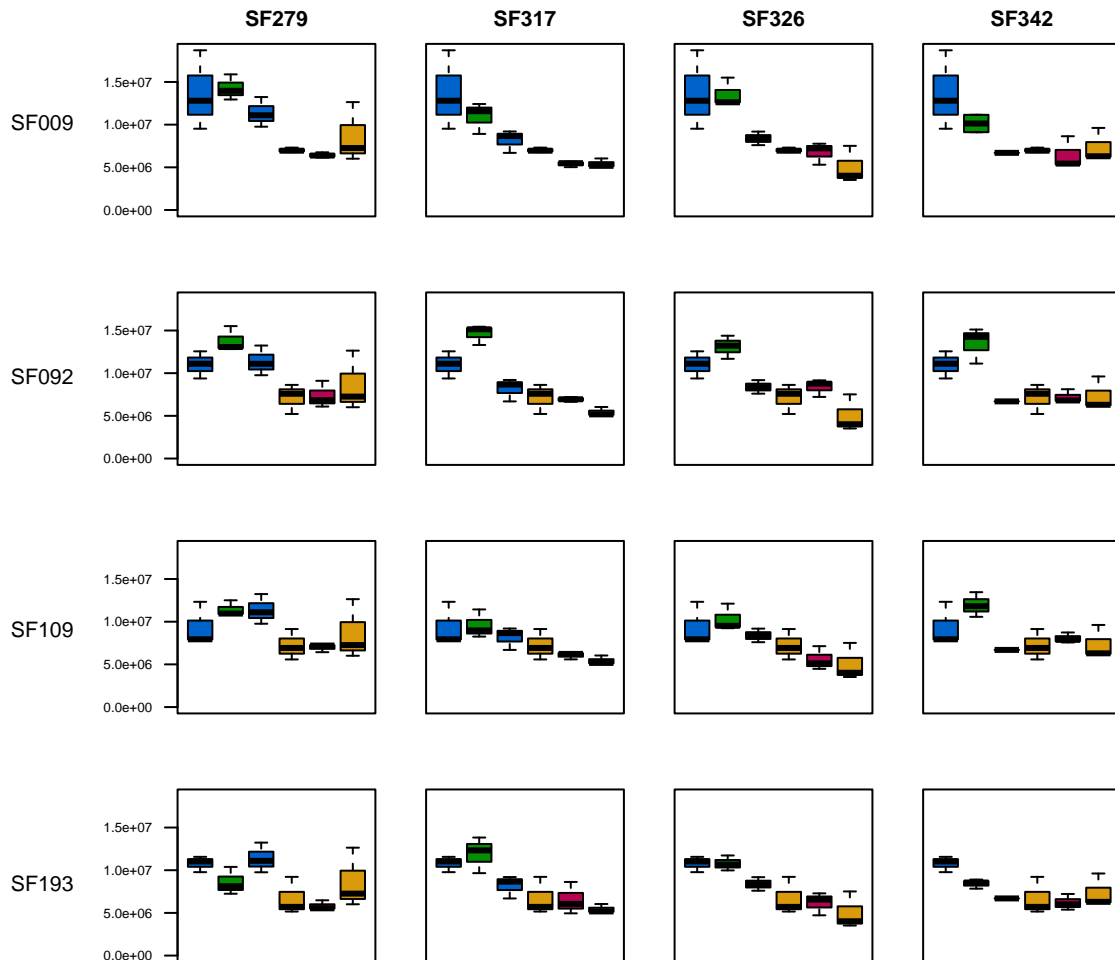

HanXRQChr12g0360761  
Probable hydroxyphenylpyruvate reductase

- Parents WW
- Parents WD
- Hybrids WW
- Hybrids WD

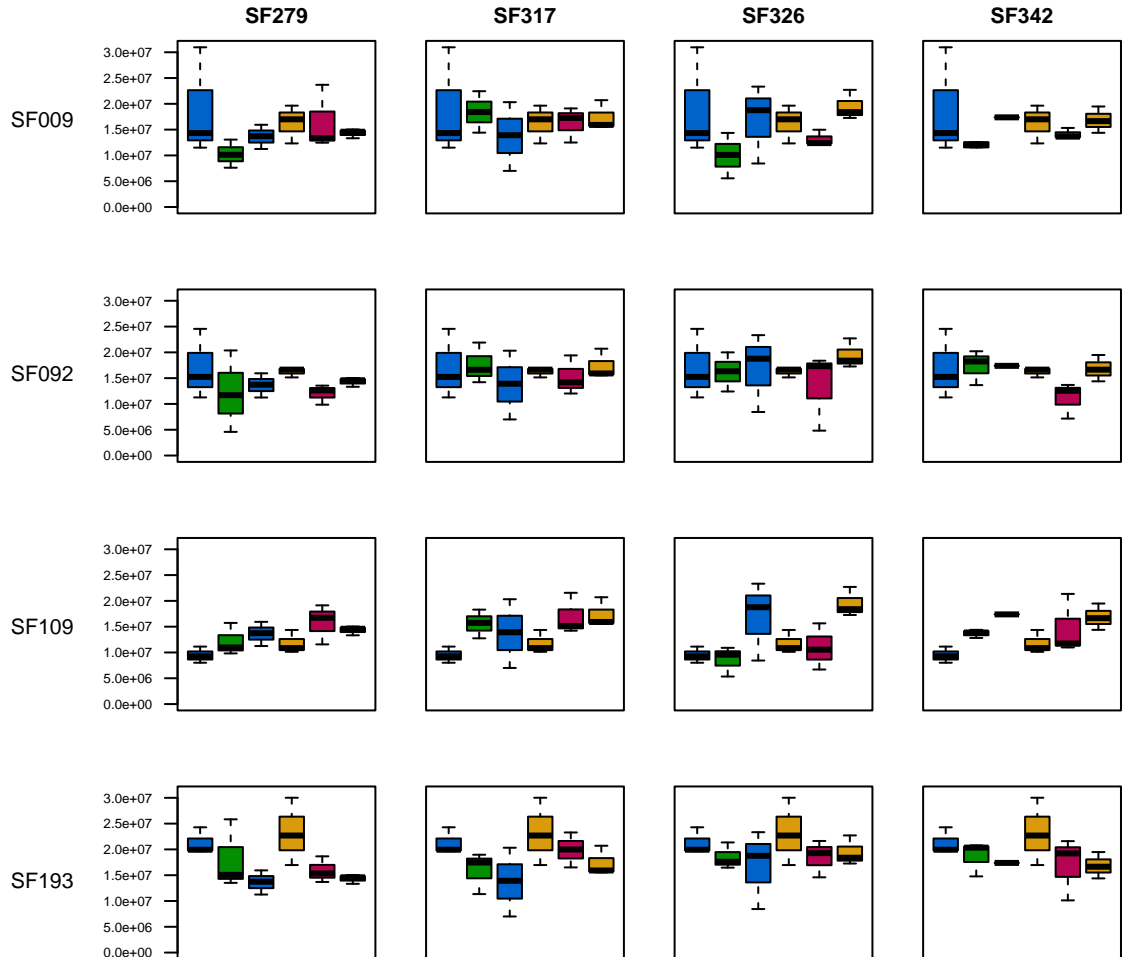

HanXRQChr03g0063581  
Putative  
S-adenosyl-L-methionine-dependent met

Parents WW  
Parents WD  
Hybrids WW  
Hybrids WD

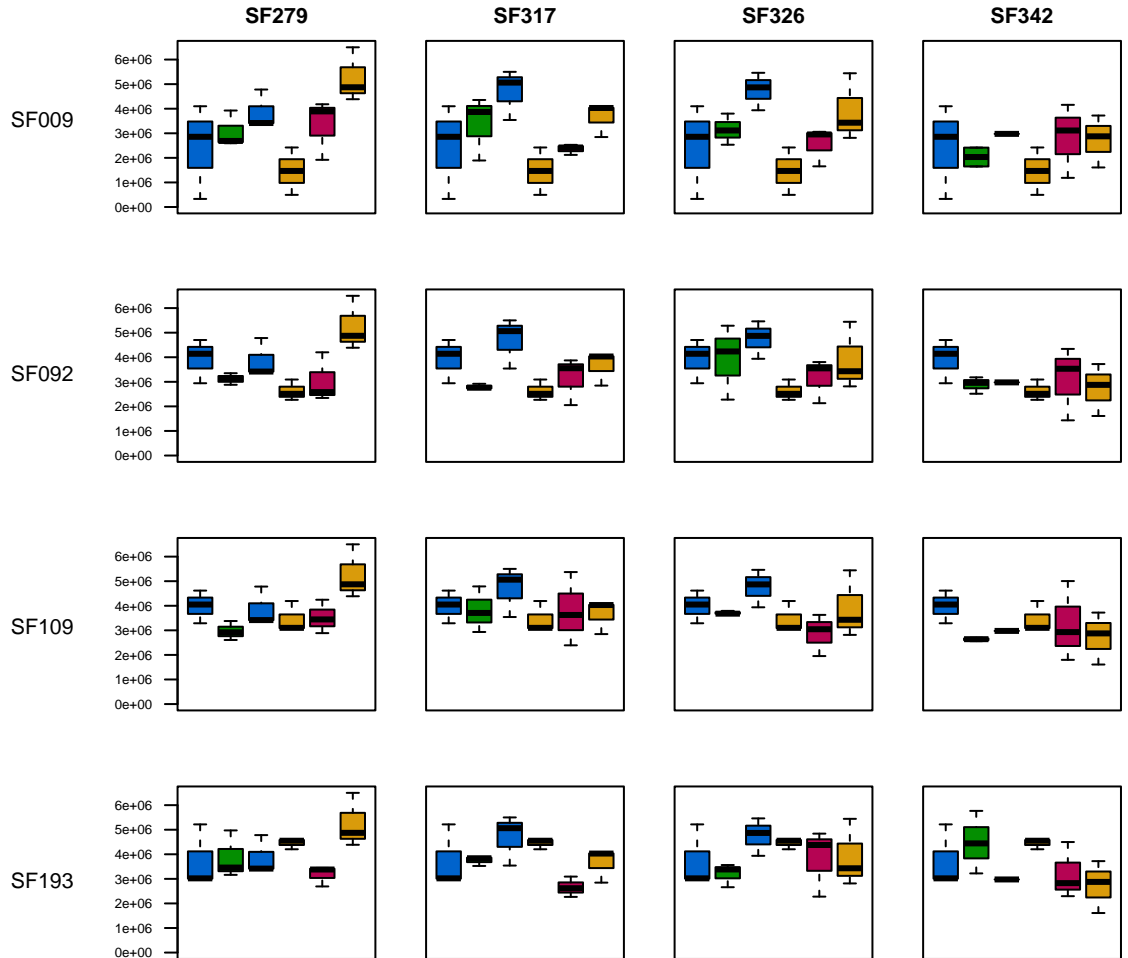

HanXRQChr15g0464621  
Putative phosphoglycerate mutase,  
2,3-bisphosphoglycerate-independent

Parents WW  
Parents WD  
Hybrids WW  
Hybrids WD

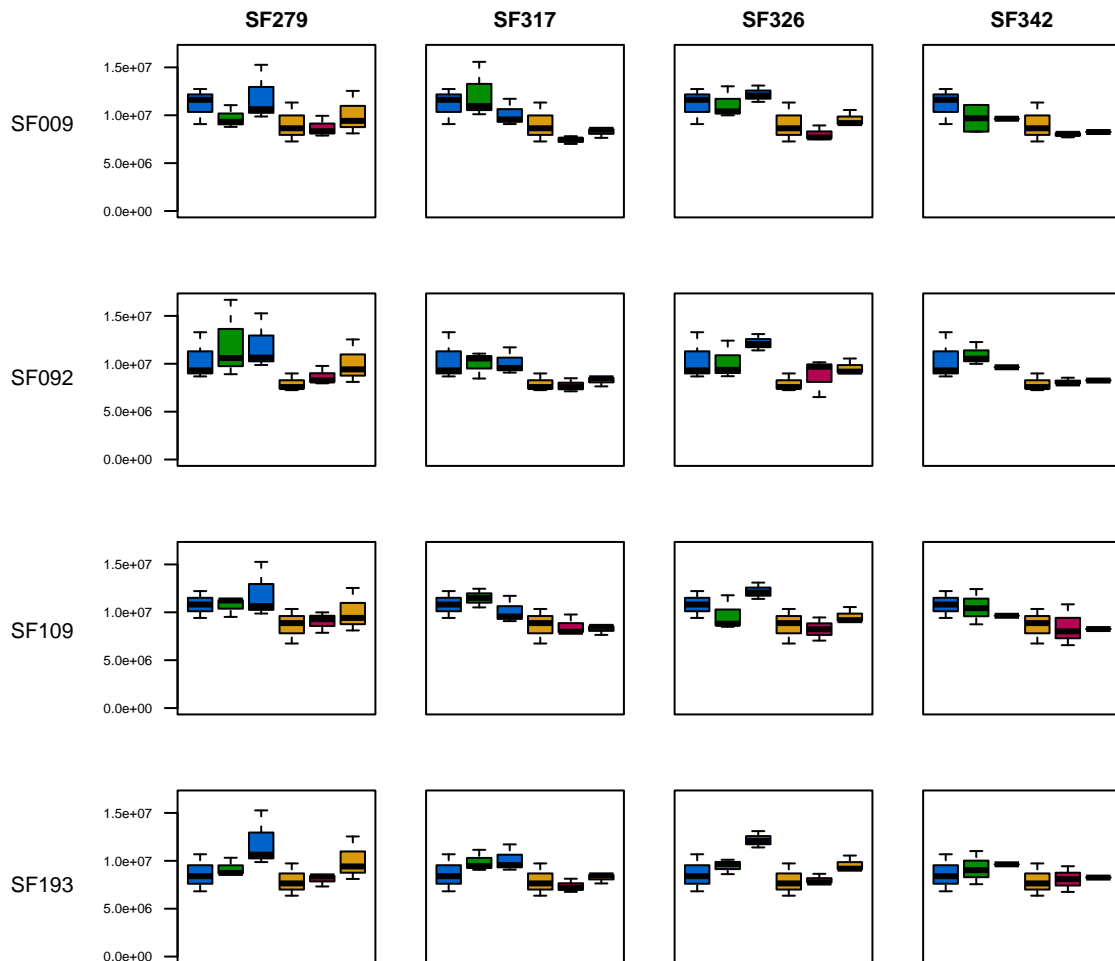

HanXRQChr02g0050021  
Probable membrane protein, putative

Parents WW  
Parents WD  
Hybrids WW  
Hybrids WD

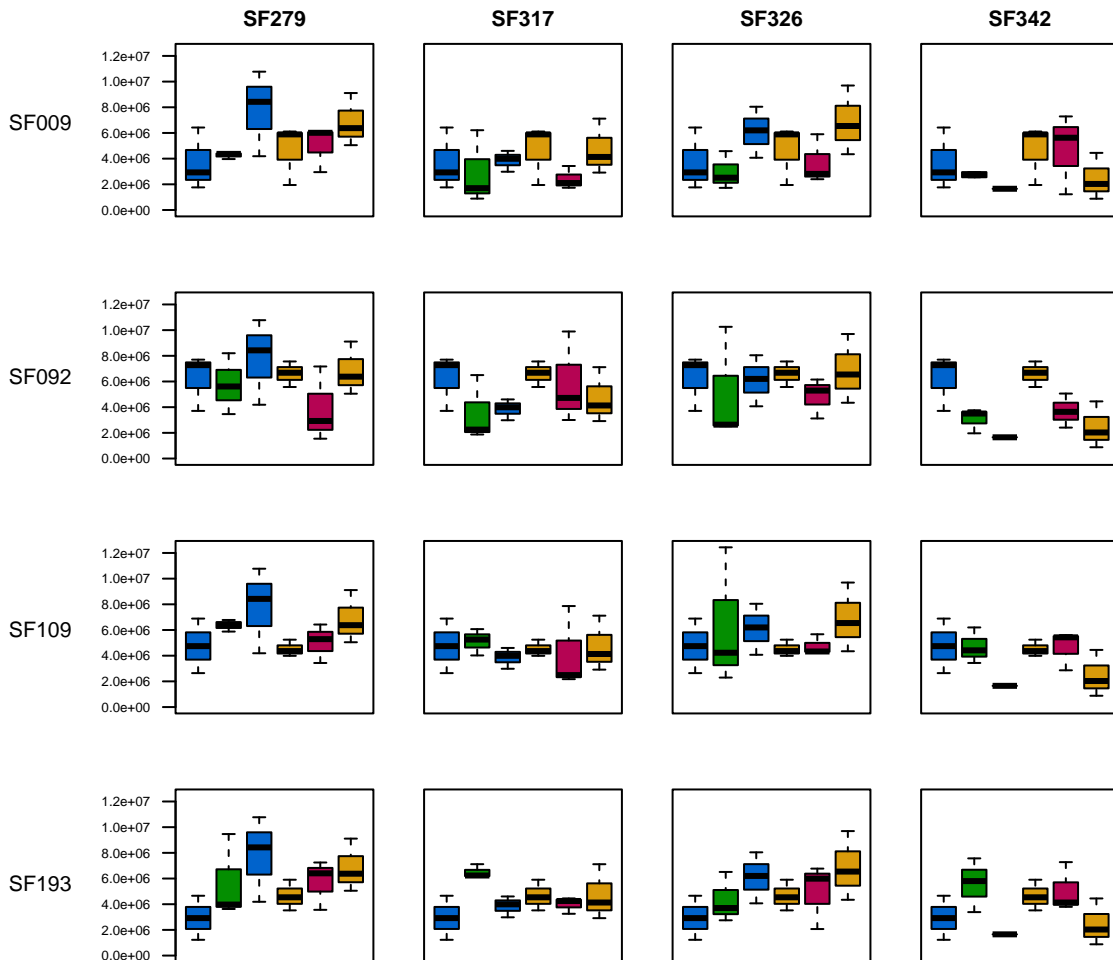

HanXRQChr02g0056551  
Putative lipoxygenase; Lipoxygenase,  
domain 3

Parents WW  
Parents WD  
Hybrids WW  
Hybrids WD

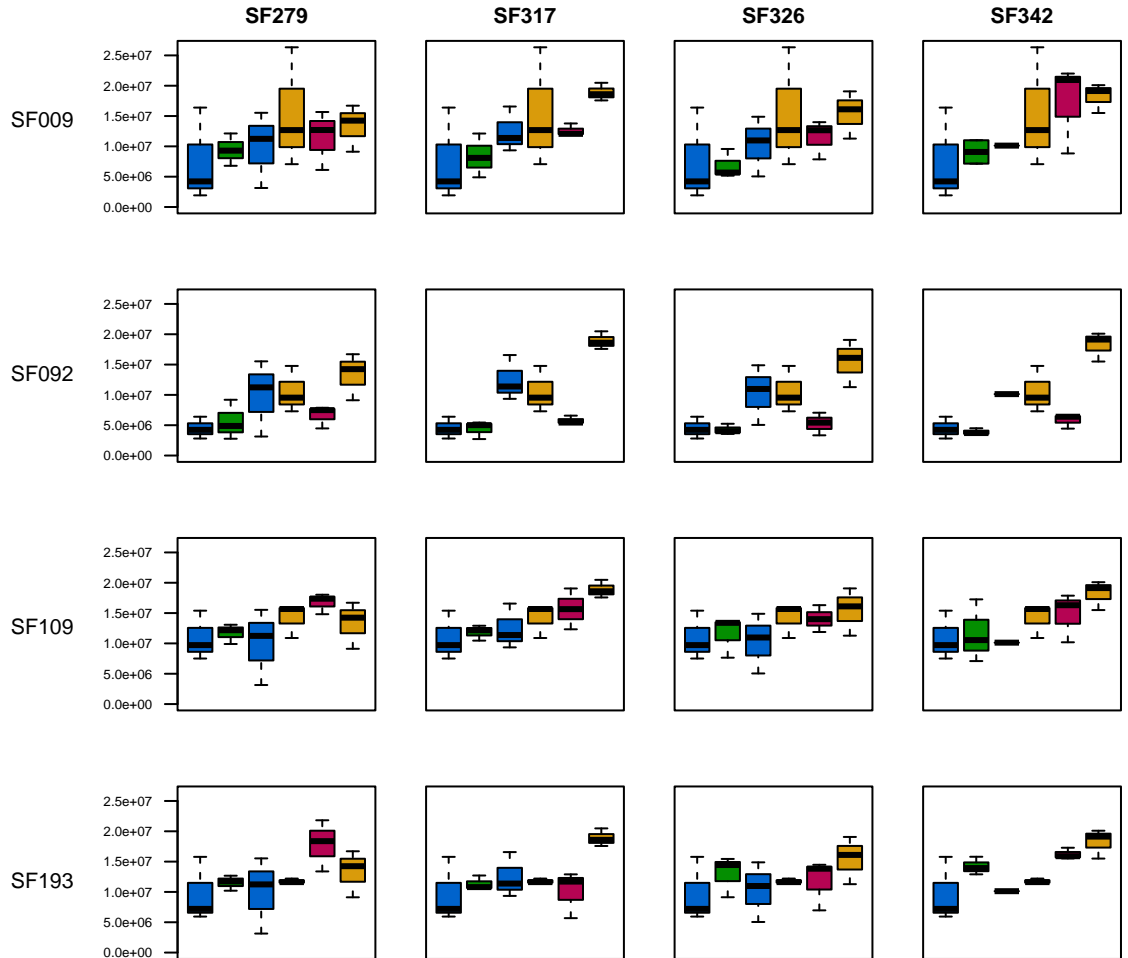

HanXRQChr10g0303711  
Putative glycoside hydrolase, family  
19; Lysozyme-like domain

Parents WW  
Parents WD  
Hybrids WW  
Hybrids WD

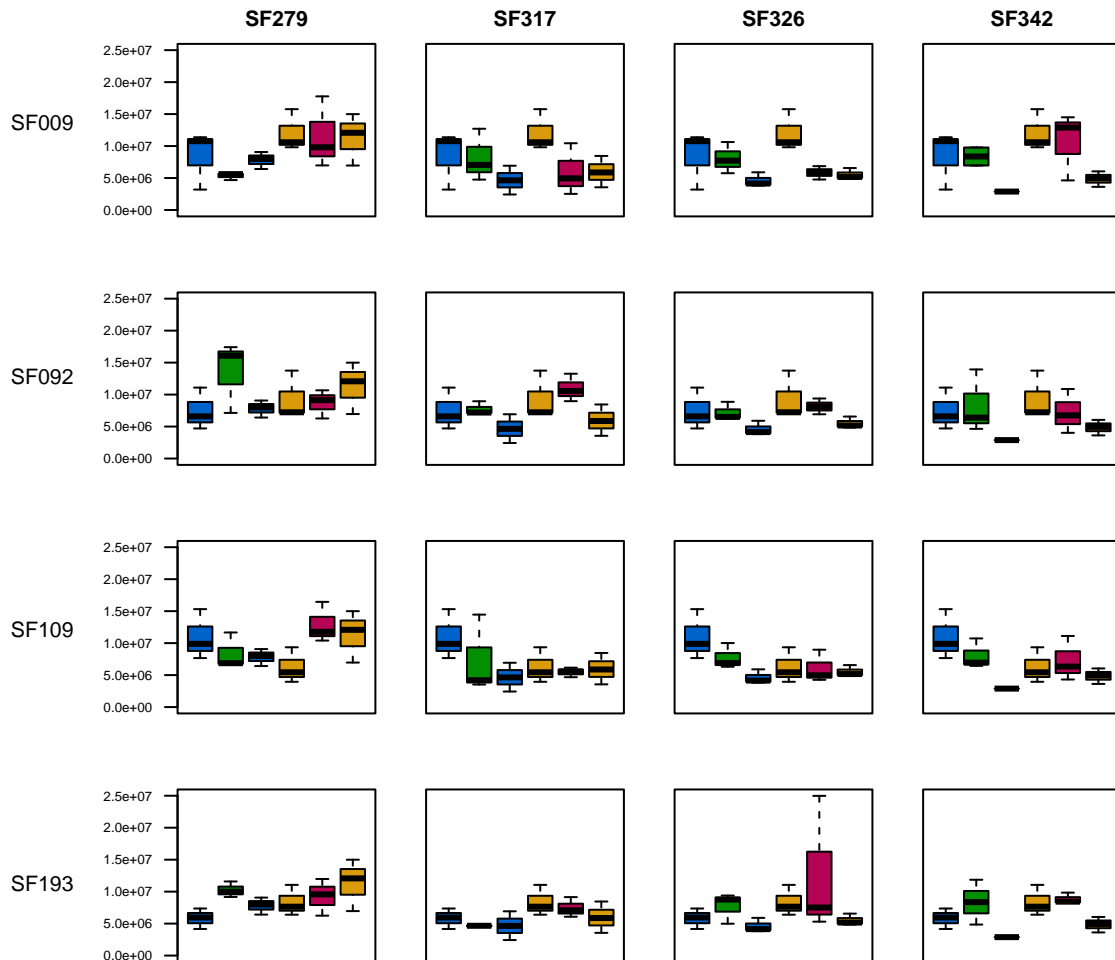



HanXRQChr05g0133141  
Putative haem peroxidase

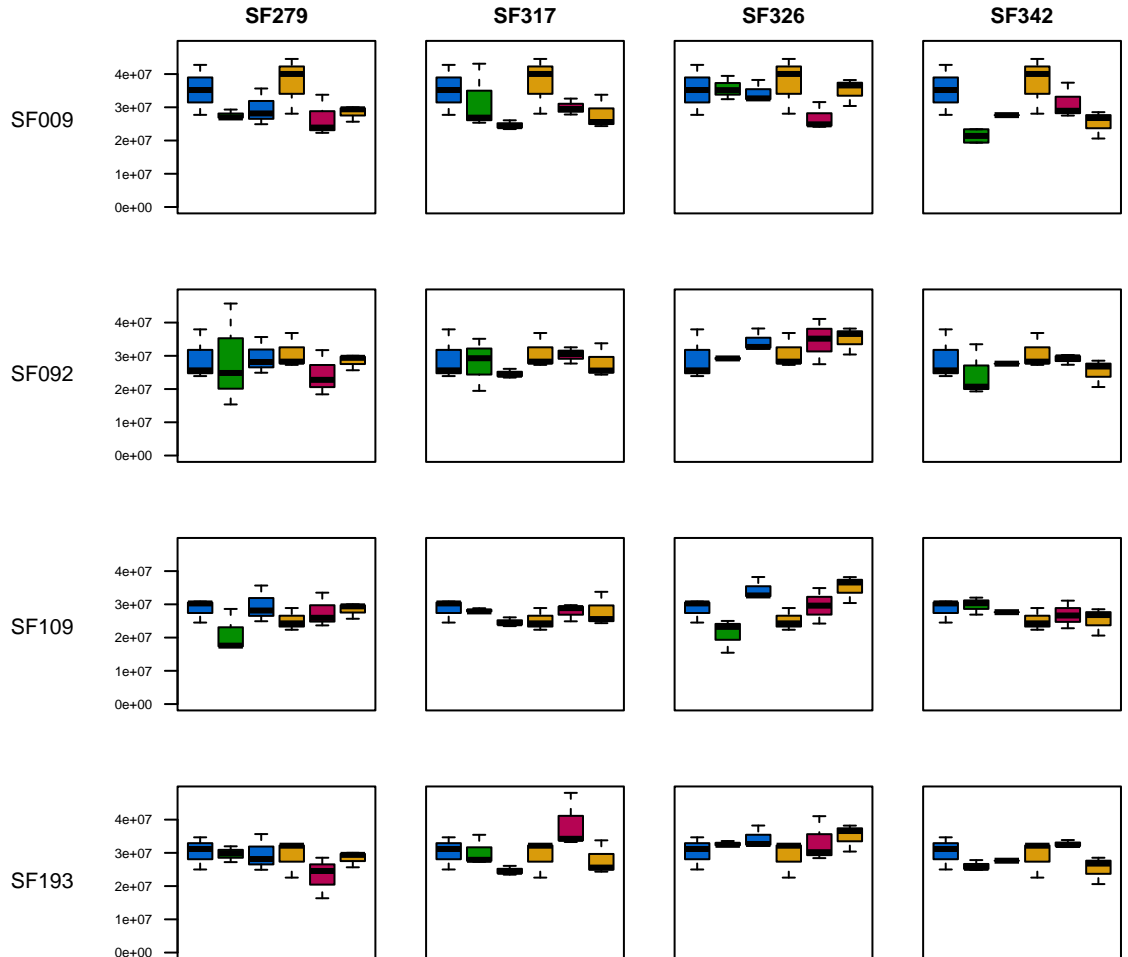

HanXRQChr03g0092961  
Putative hyaluronan/mRNA-binding  
protein; Stm1, N-terminal

Parents WW  
Parents WD  
Hybrids WW  
Hybrids WD

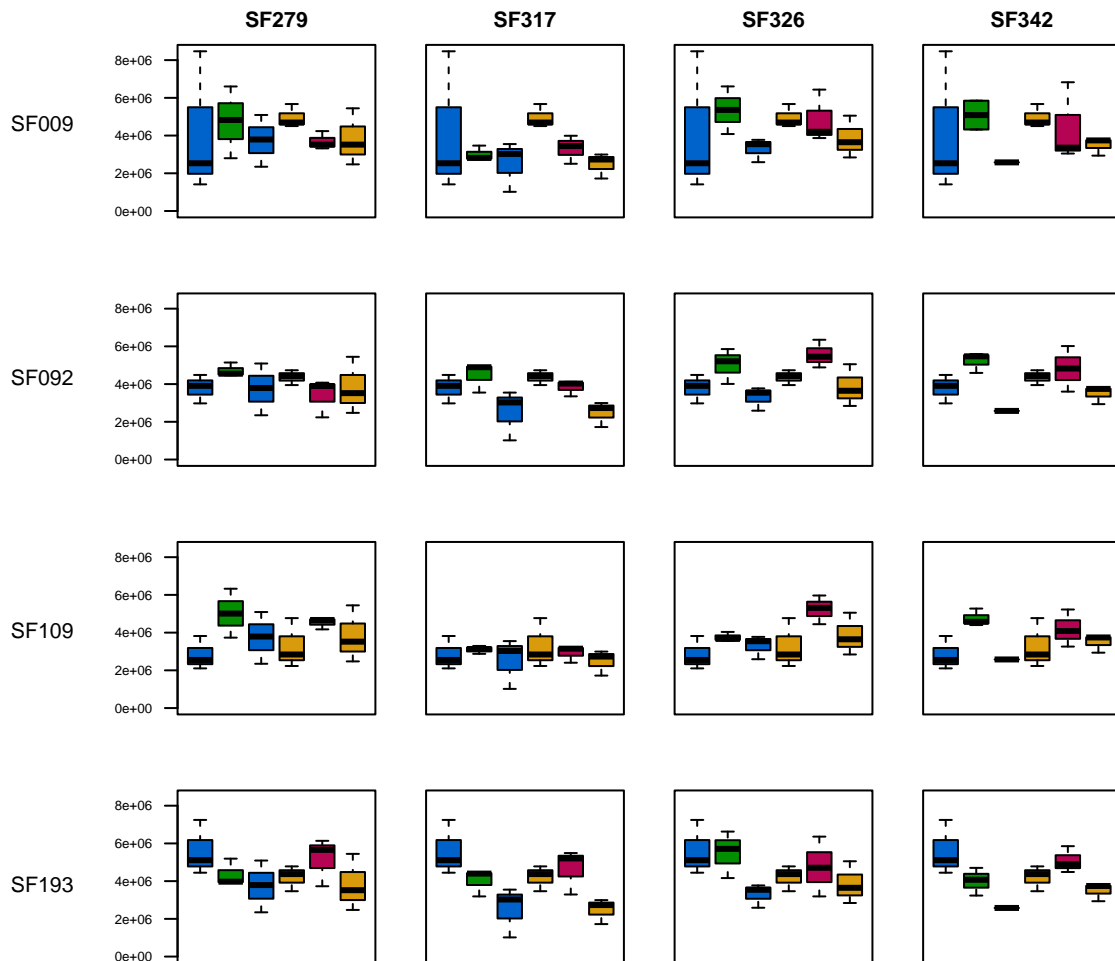

HanXRQChr16g0503691  
Probable aldehyde dehydrogenase 2B4

Parents WW  
Parents WD  
Hybrids WW  
Hybrids WD

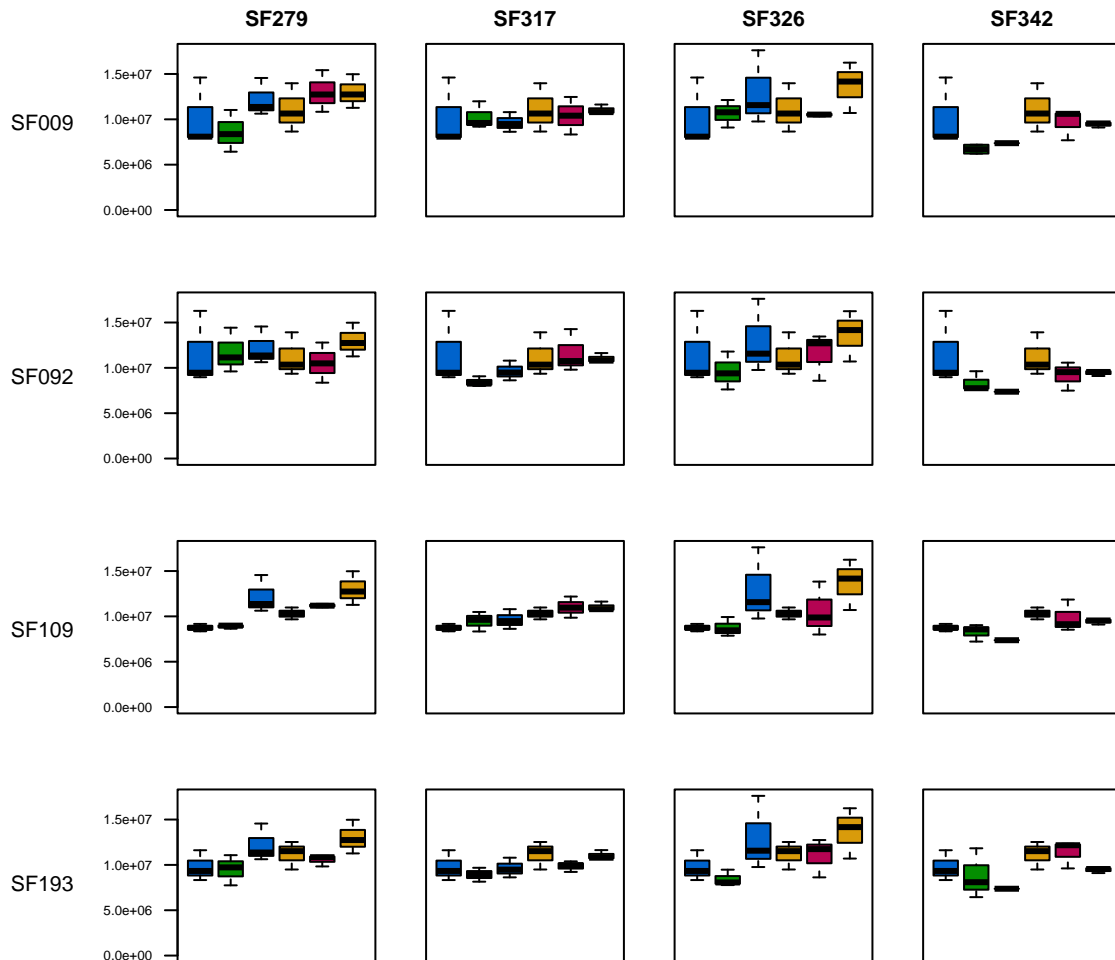

HanXRQChr13g0410471  
Putative glycine cleavage system P  
protein

Parents WW  
Parents WD  
Hybrids WW  
Hybrids WD

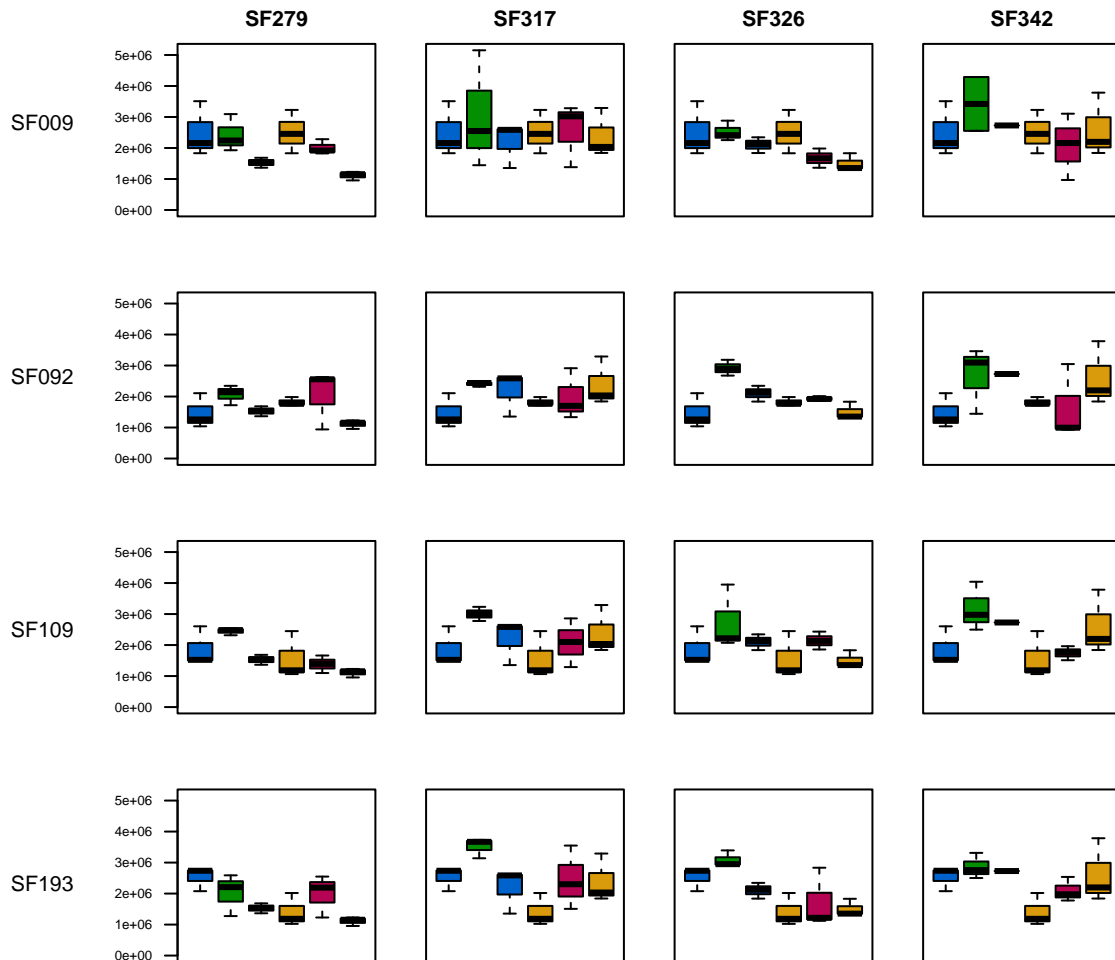

HanXRQChr09g0273851  
Putative magnesium-protoporphyrin IX  
methyltransferase; S-adenosyl-L-methioni

Parents WW  
Parents WD  
Hybrids WW  
Hybrids WD

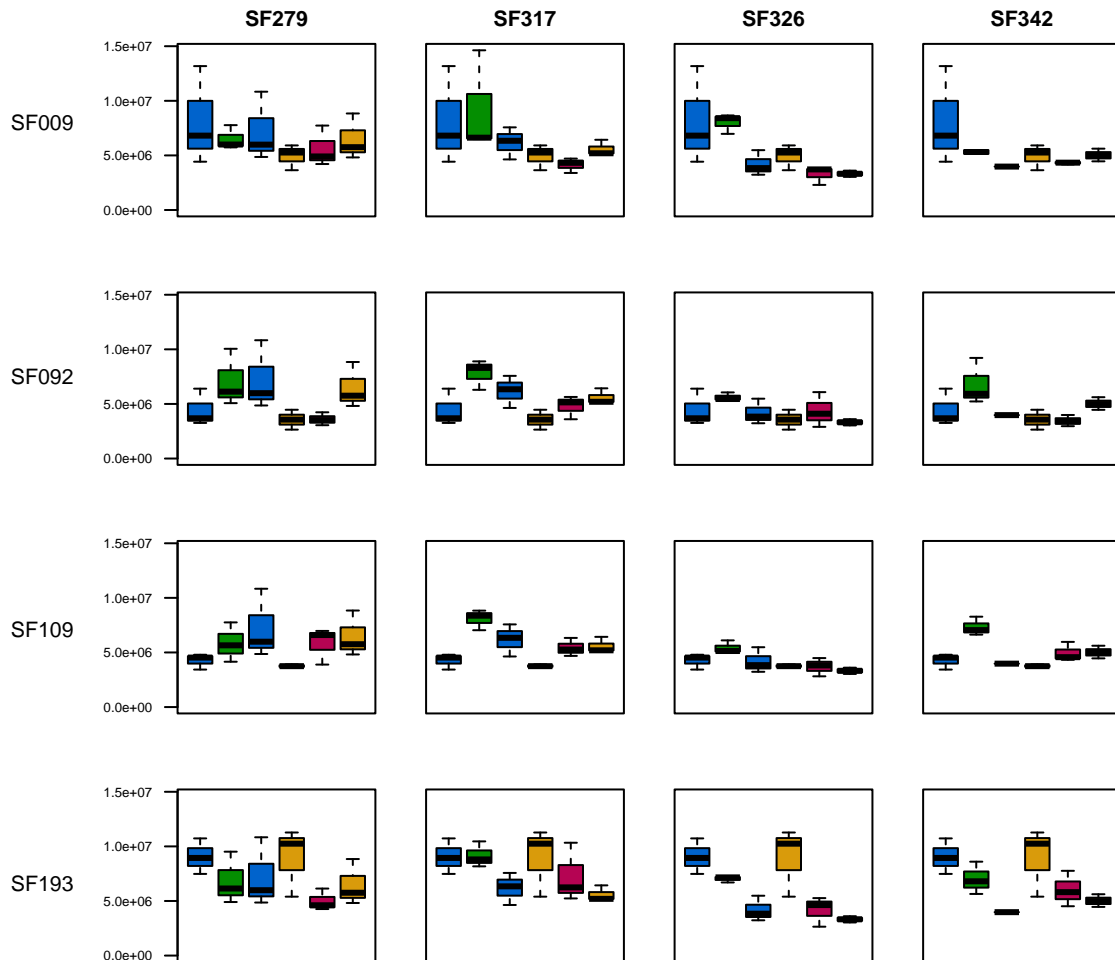

HanXRQChr12g0368891  
Probable malate dehydrogenase [NADP],  
chloroplastic

Parents WW  
Parents WD  
Hybrids WW  
Hybrids WD

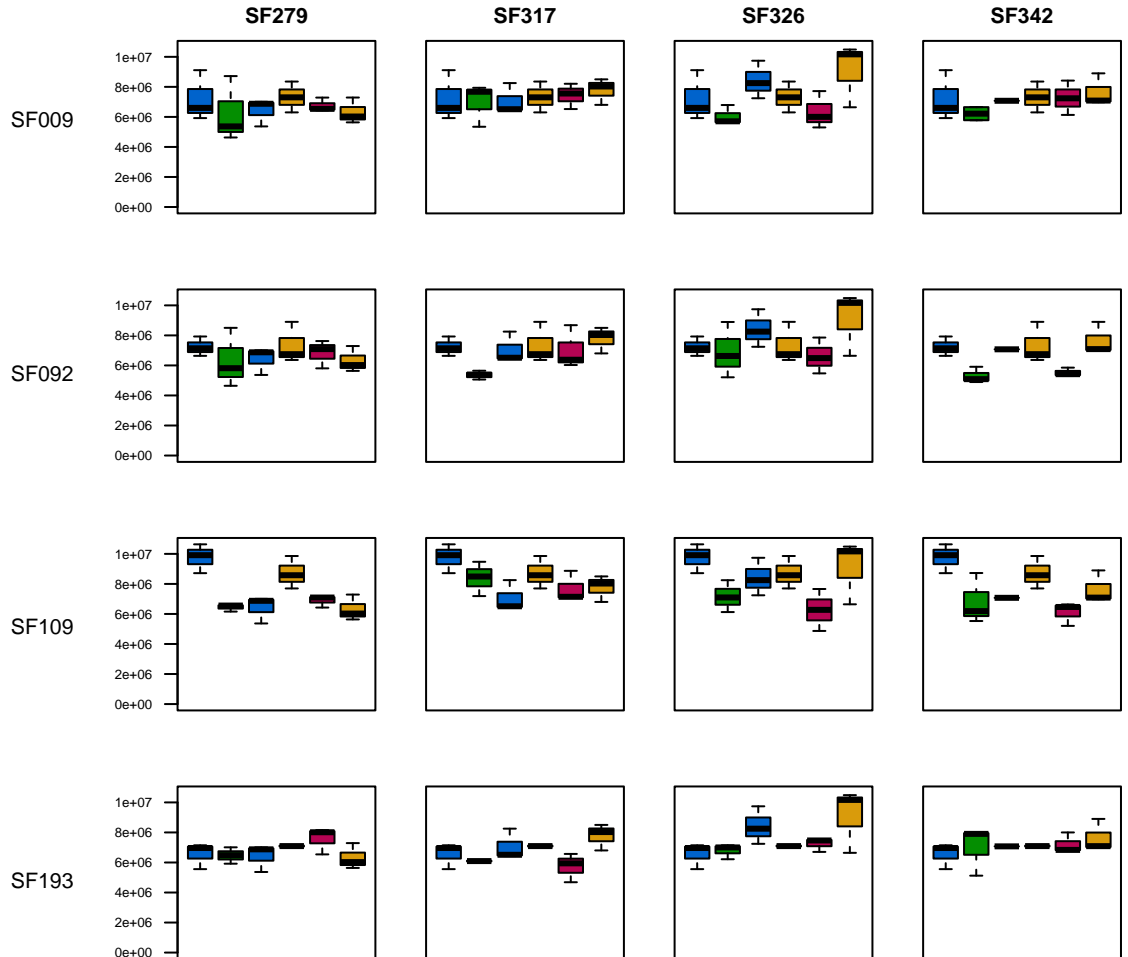

HanXRQChr14g0445101  
Probable 14-3-3-like protein 16R

Parents WW  
Parents WD  
Hybrids WW  
Hybrids WD

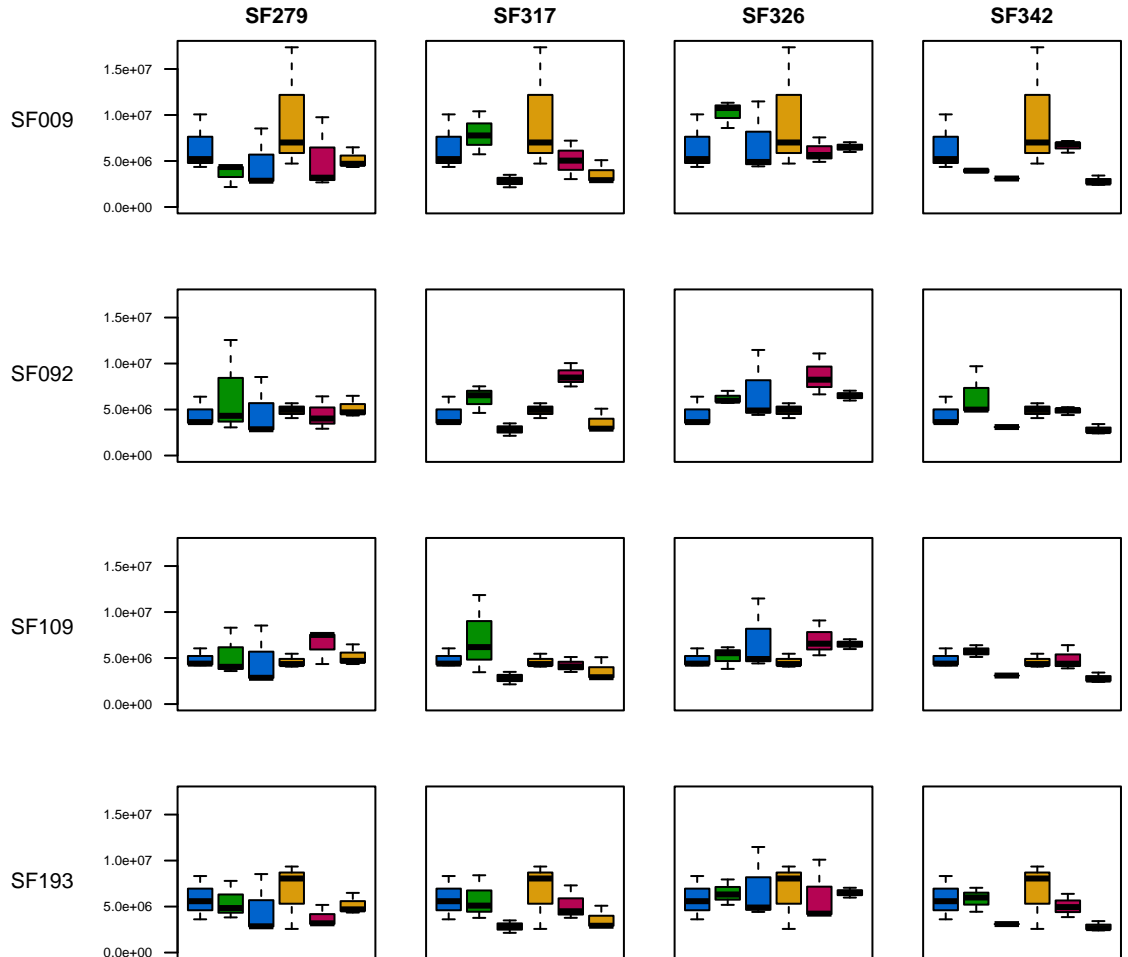

HanXRQChr08g0225681  
Putative cytochrome b5-like  
heme/steroid binding domain

Parents WW  
Parents WD  
Hybrids WW  
Hybrids WD

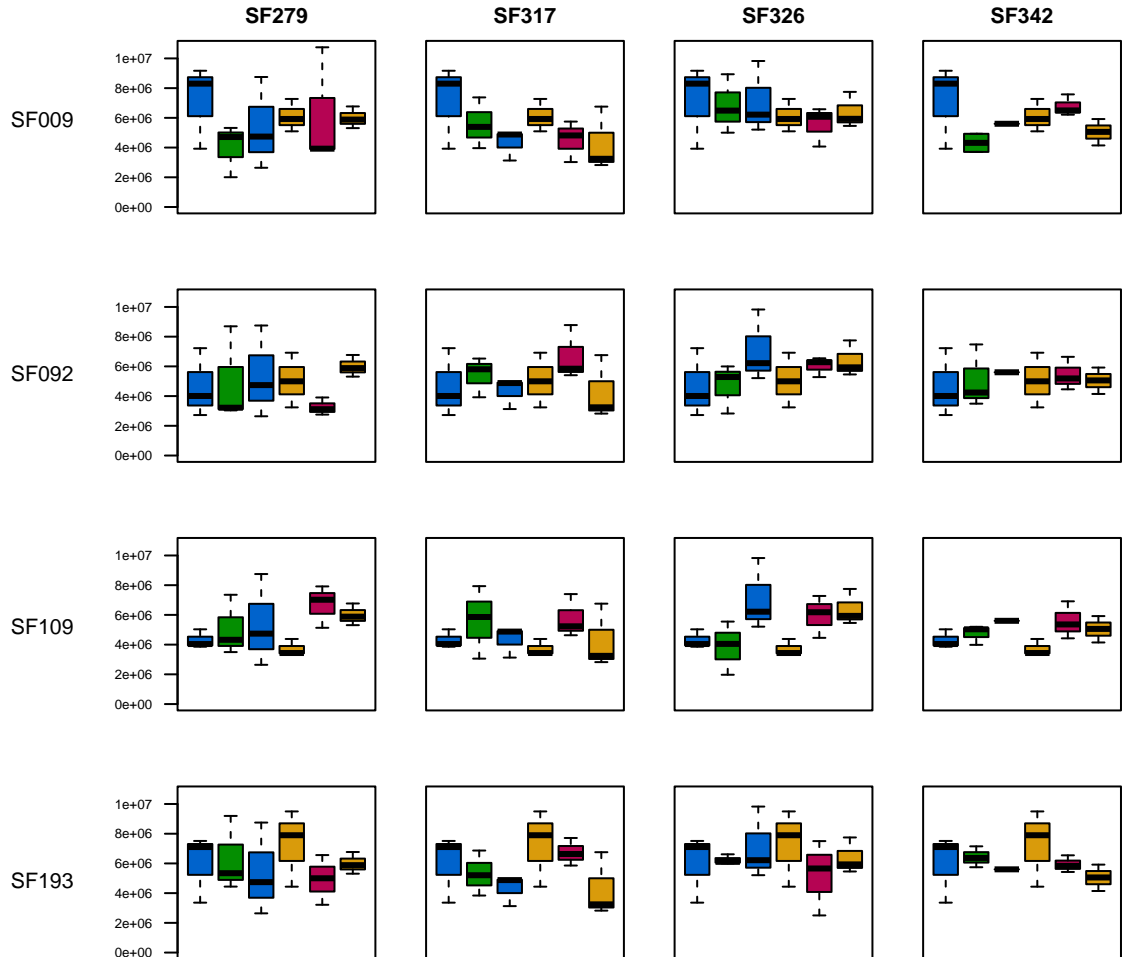



HanXRQChr14g0434951  
Putative plastid lipid-associated  
protein/fibrillin conserved domain

Parents WW  
Parents WD  
Hybrids WW  
Hybrids WD

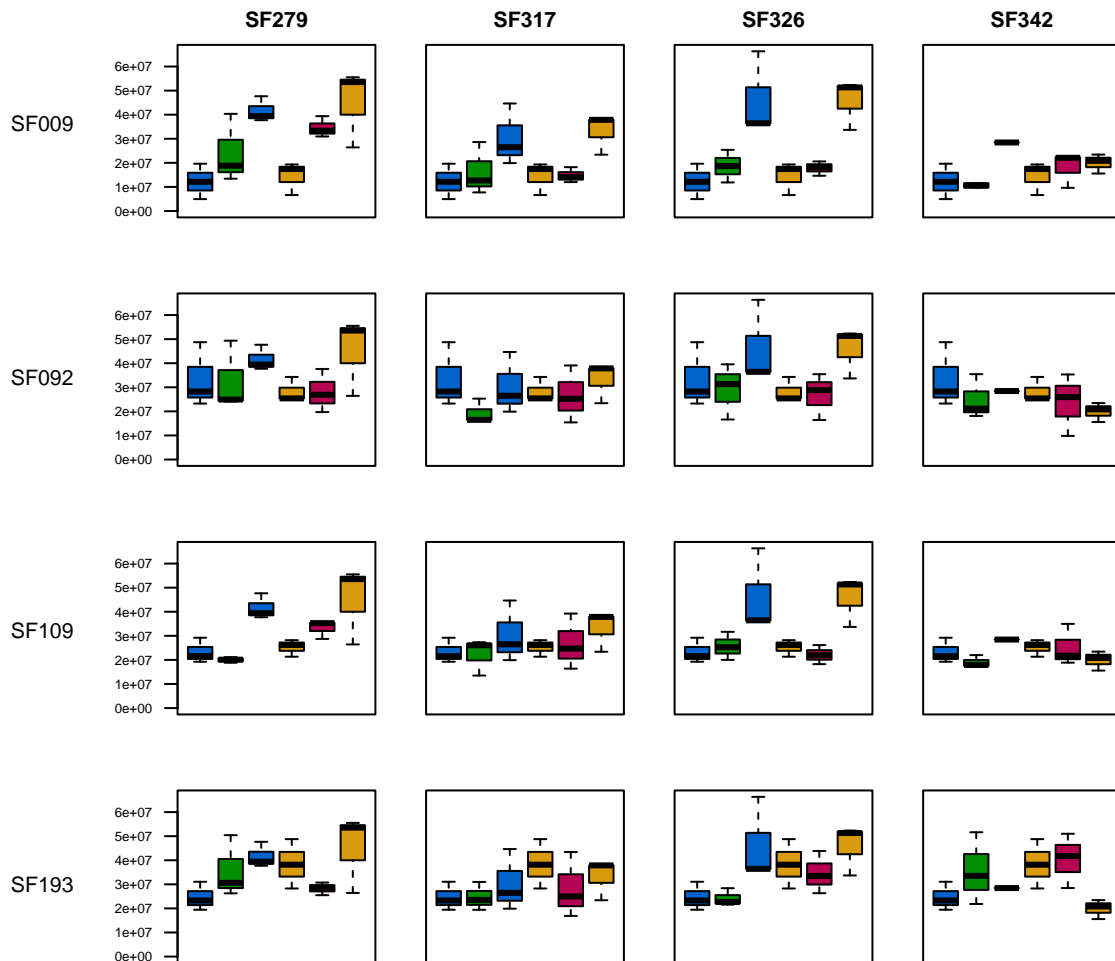

HanXRQChr04g0104091  
Probable mov34/MPN/PAD-1 family protein

Parents WW  
Parents WD  
Hybrids WW  
Hybrids WD

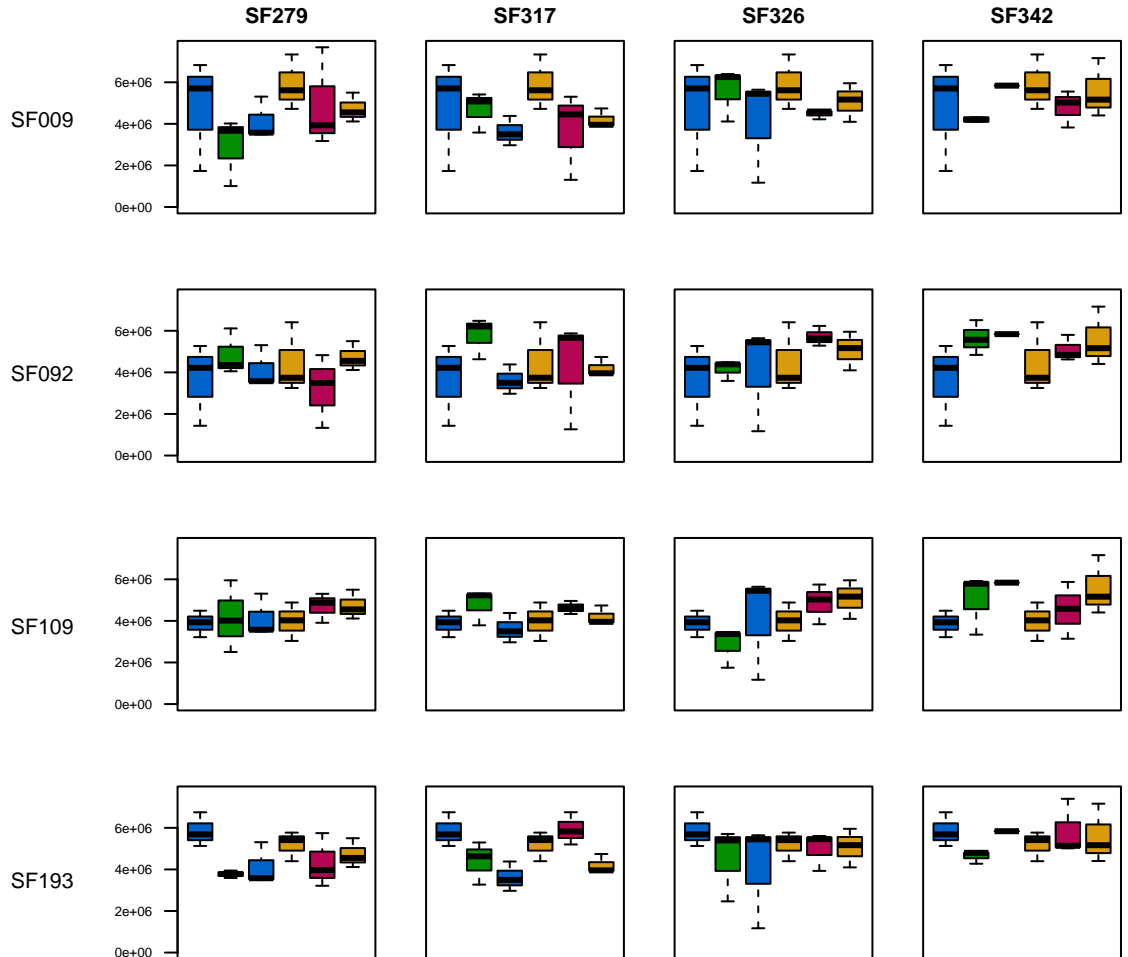

HanXRQChr07g0190751  
 Probable translation elongation factor  
 EF1B/ribosomal protein S6 family protein

Parents WW  
 Parents WD  
 Hybrids WW  
 Hybrids WD

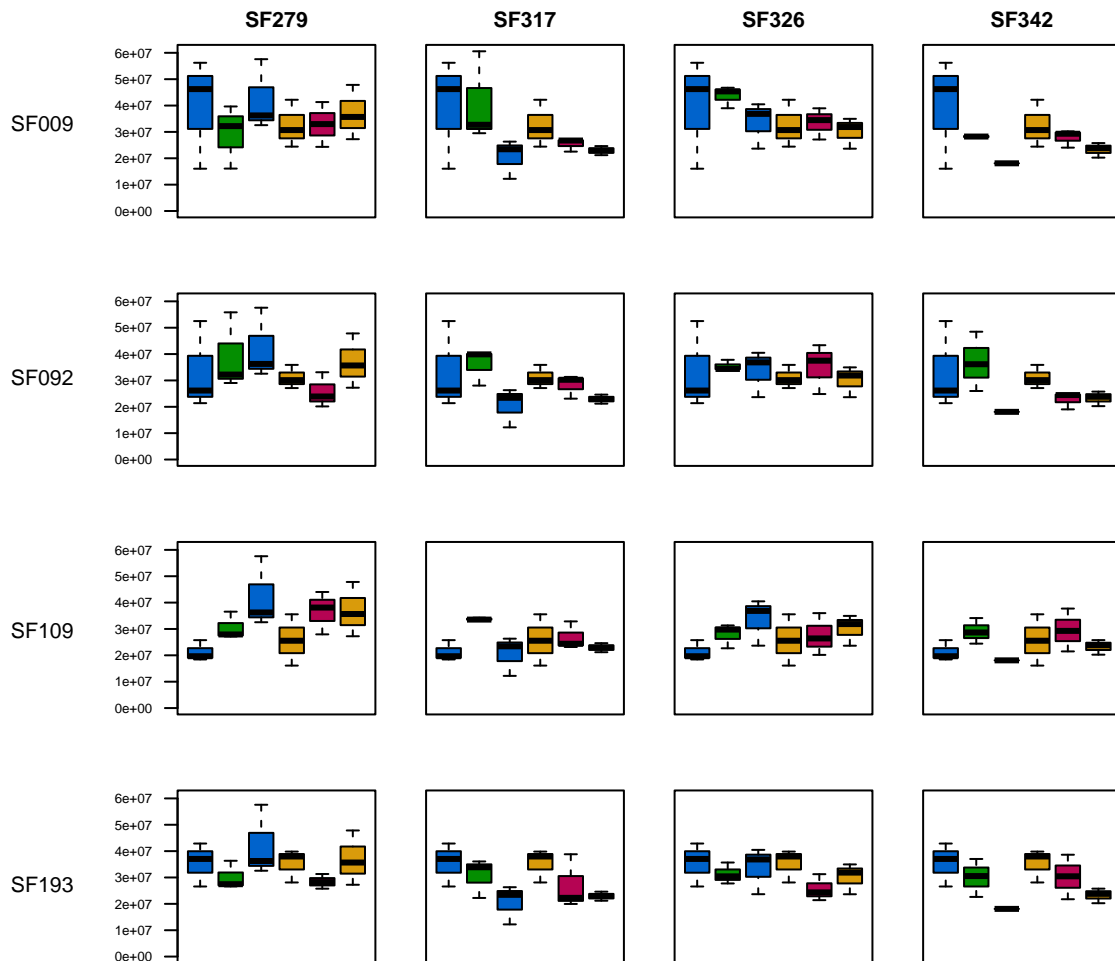

HanXRQChr15g0470421  
Probable aminomethyltransferase,  
mitochondrial

Parents WW  
Parents WD  
Hybrids WW  
Hybrids WD

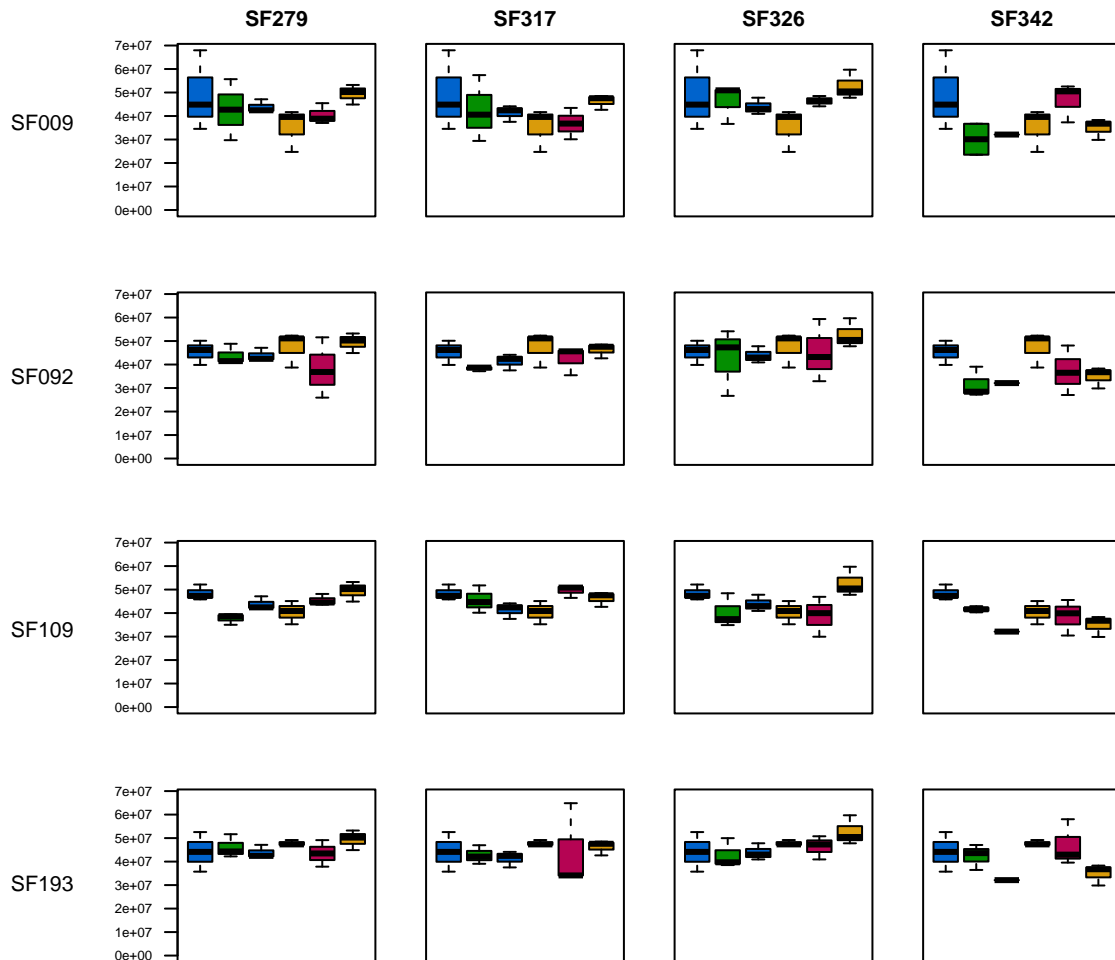

HanXRQChr04g0124671  
Probable fructose-1,6-bisphosphatase,  
chloroplastic

Parents WW  
Parents WD  
Hybrids WW  
Hybrids WD

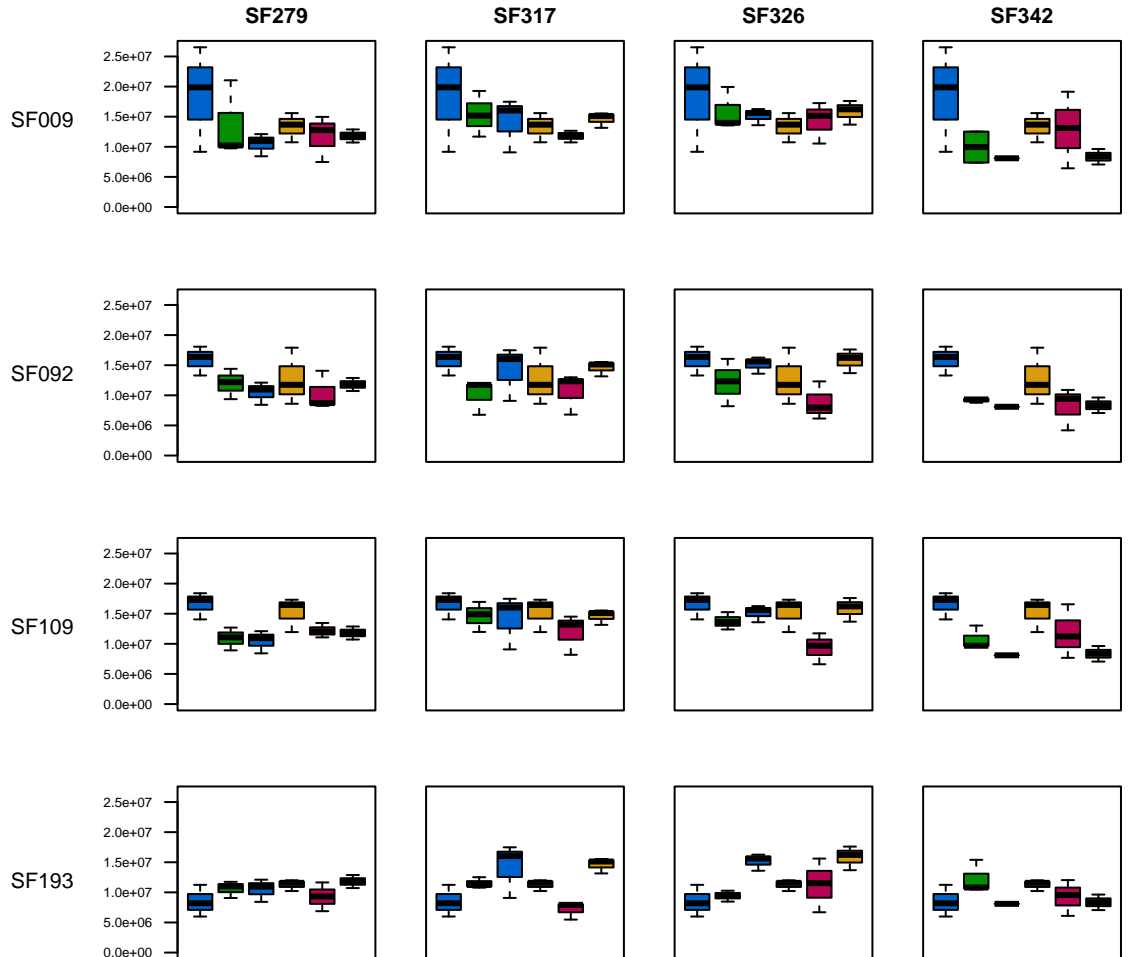

HanXRQChr09g0257521  
Putative alpha-hydroxy acid  
dehydrogenase, FMN-dependent; Aldolase

Parents WW  
Parents WD  
Hybrids WW  
Hybrids WD

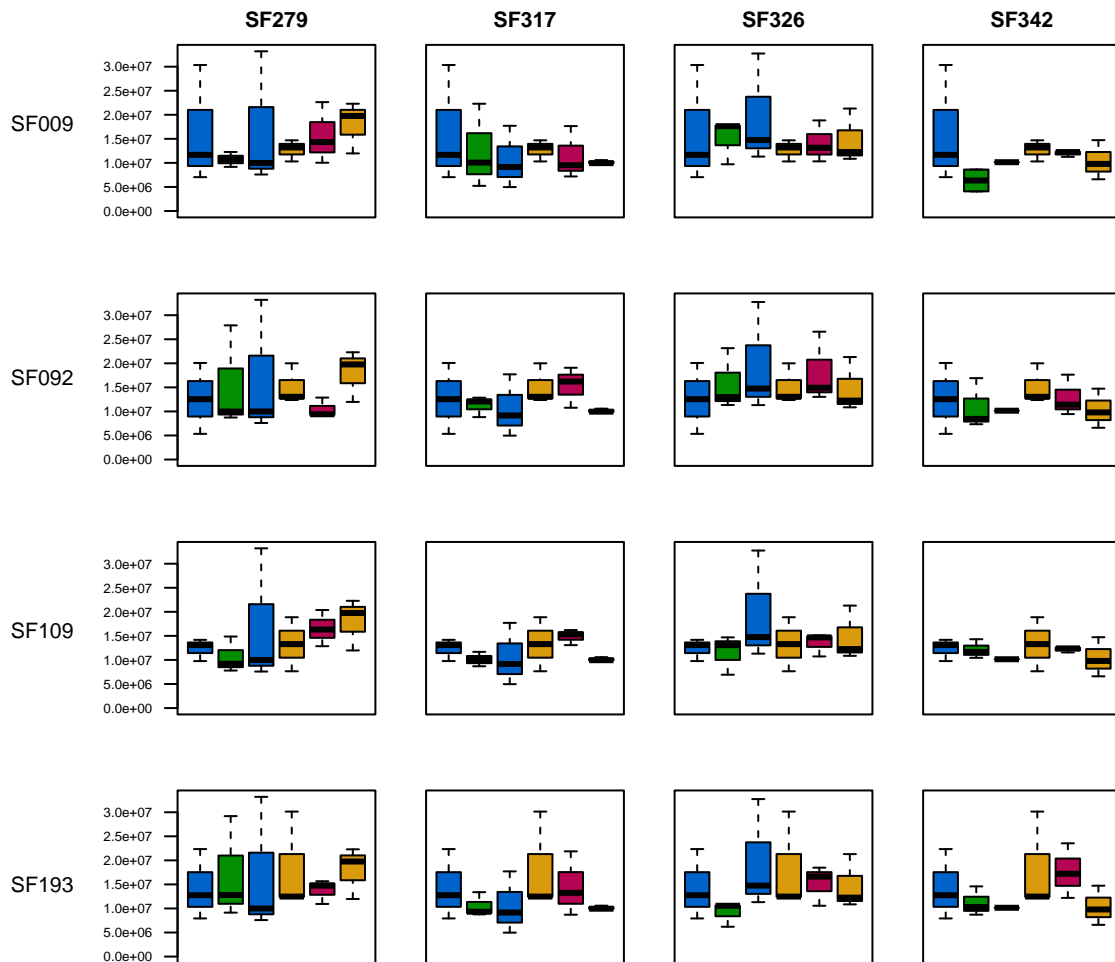

HanXRQChr14g0461031  
Putative transcriptional  
coactivator/pterin dehydratase

Parents WW  
Parents WD  
Hybrids WW  
Hybrids WD

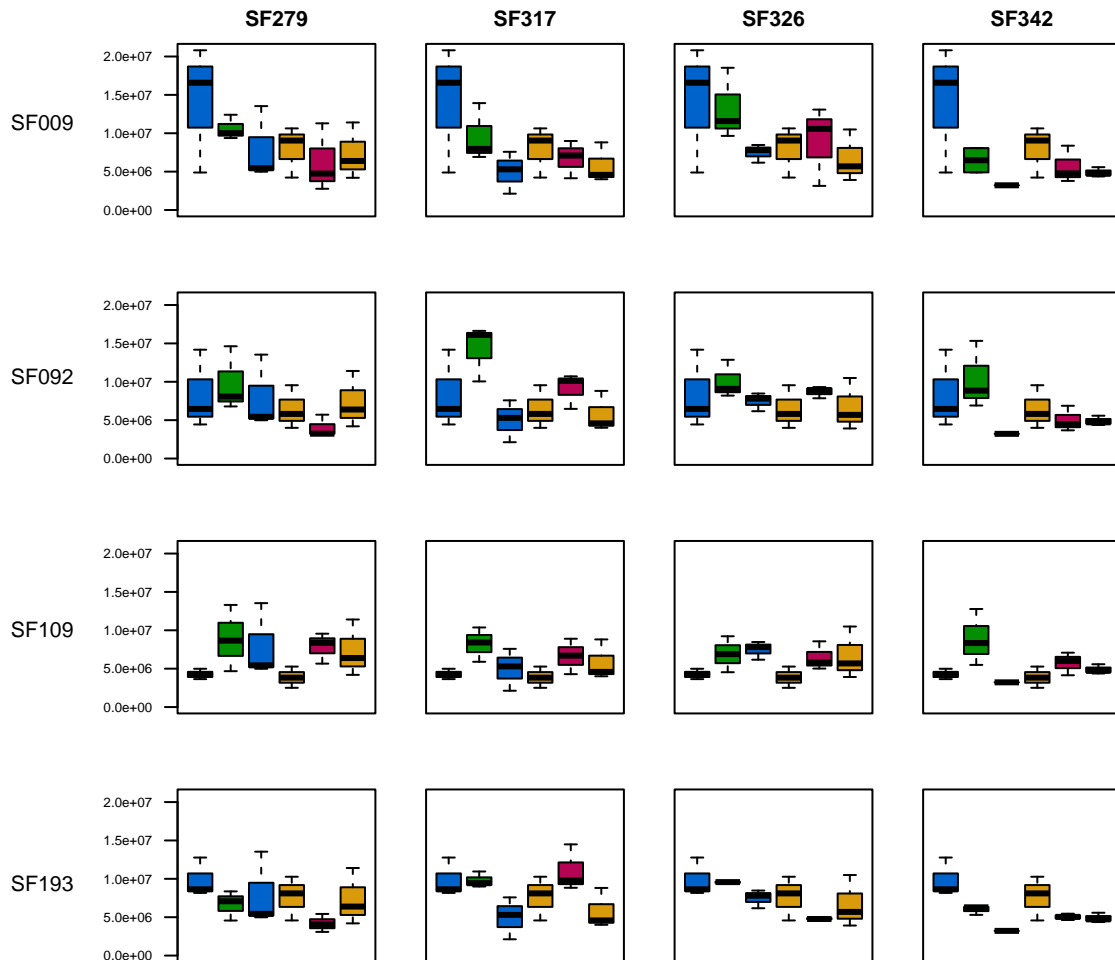

HanXRQChr07g0200961  
Probable psbP-like protein 2

Parents WW  
Parents WD  
Hybrids WW  
Hybrids WD

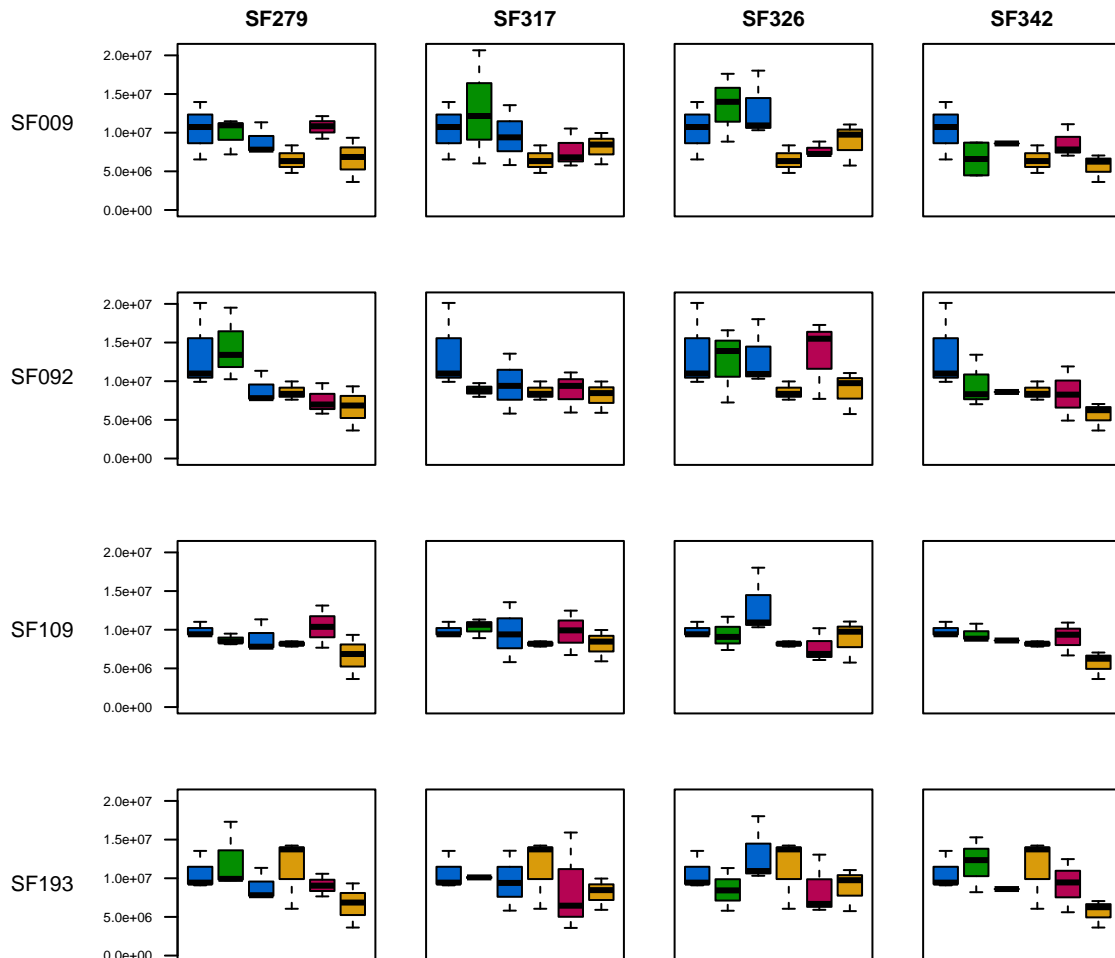



HanXRQChr09g0264371  
Probable oxygen-evolving enhancer  
protein 1, chloroplastic

Parents WW  
Parents WD  
Hybrids WW  
Hybrids WD

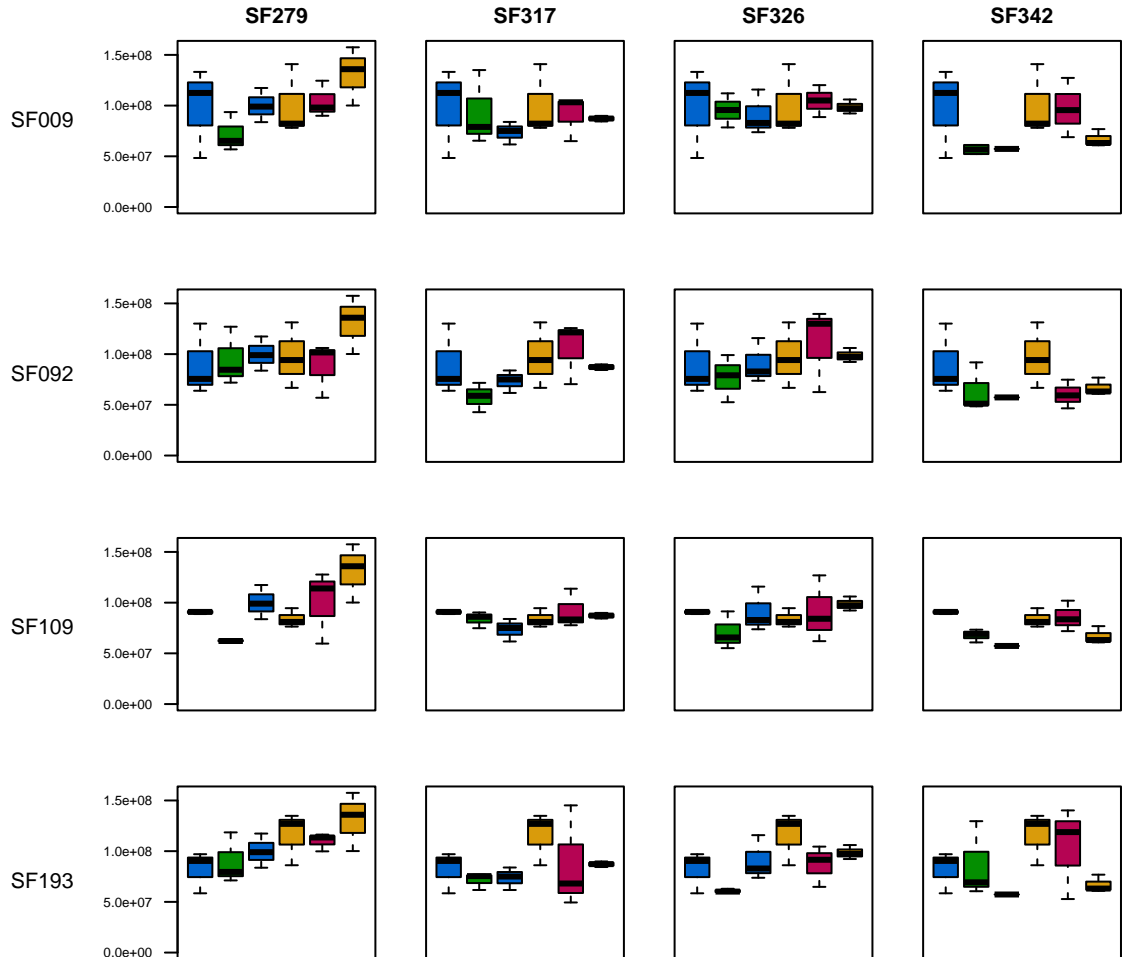

HanXRQChr01g0010591  
Probable *aha1* domain-containing protein

Parents WW  
Parents WD  
Hybrids WW  
Hybrids WD

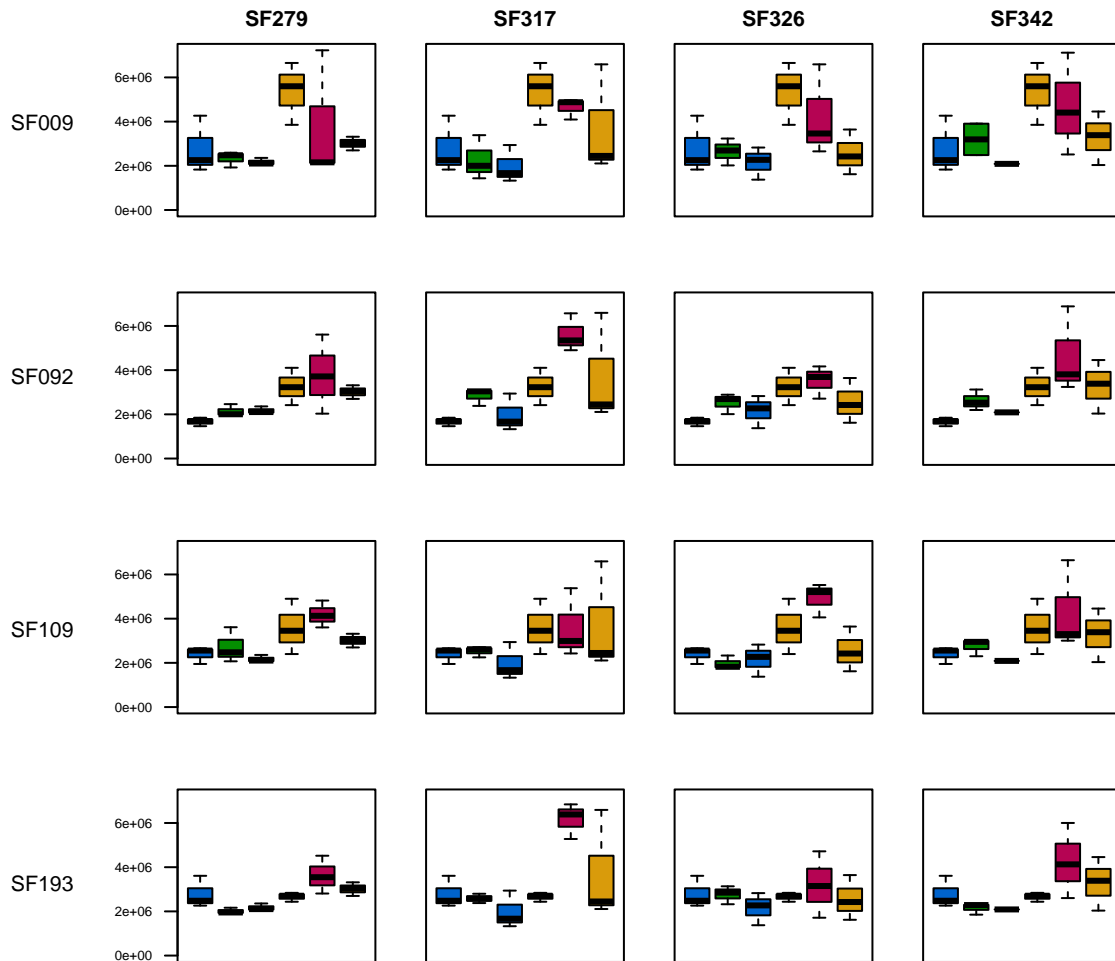

HanXRQChr01g0020401  
Putative NADH:ubiquinone  
oxidoreductase-like, 20kDa subunit

Parents WW  
Parents WD  
Hybrids WW  
Hybrids WD

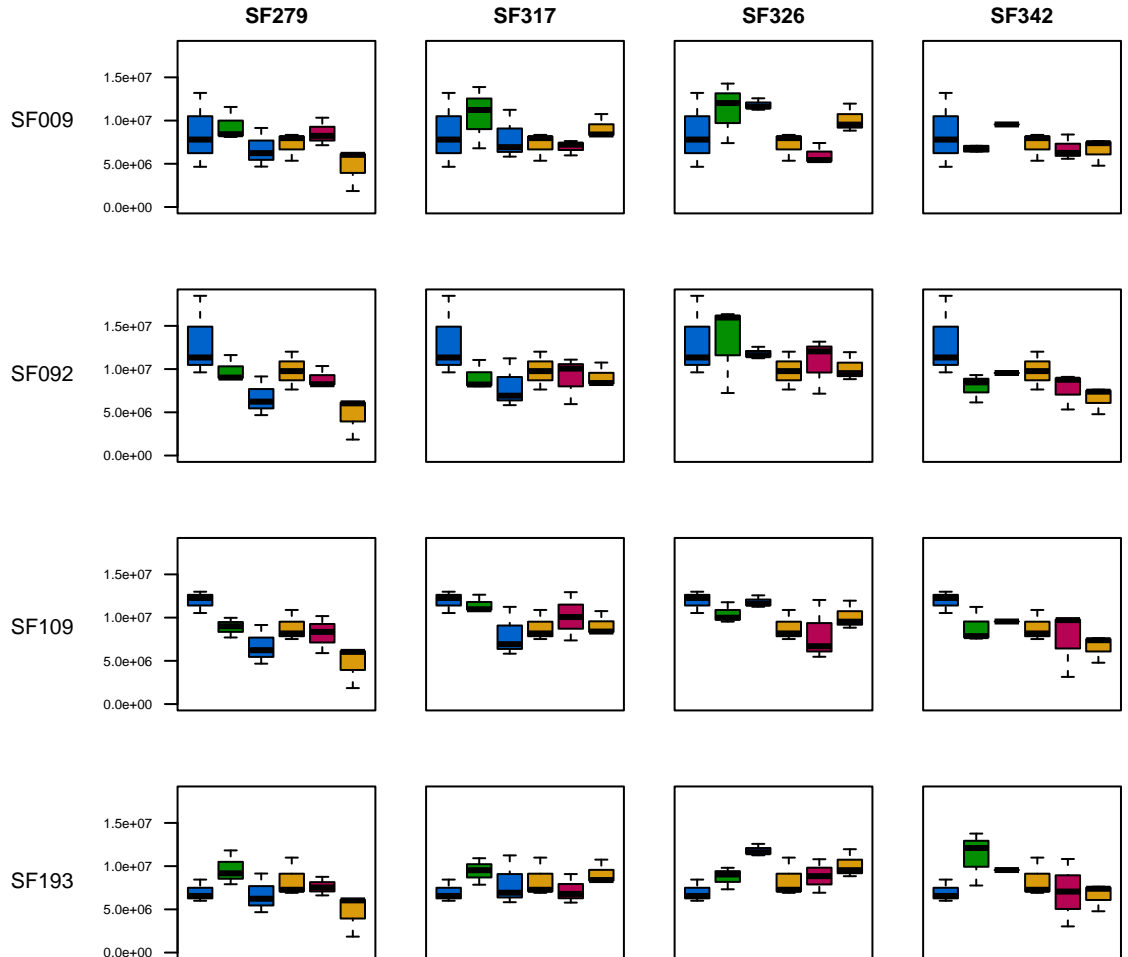

HanXRQChr12g0354281  
Probable peroxiredoxin Q, chloroplastic

Parents WW  
Parents WD  
Hybrids WW  
Hybrids WD

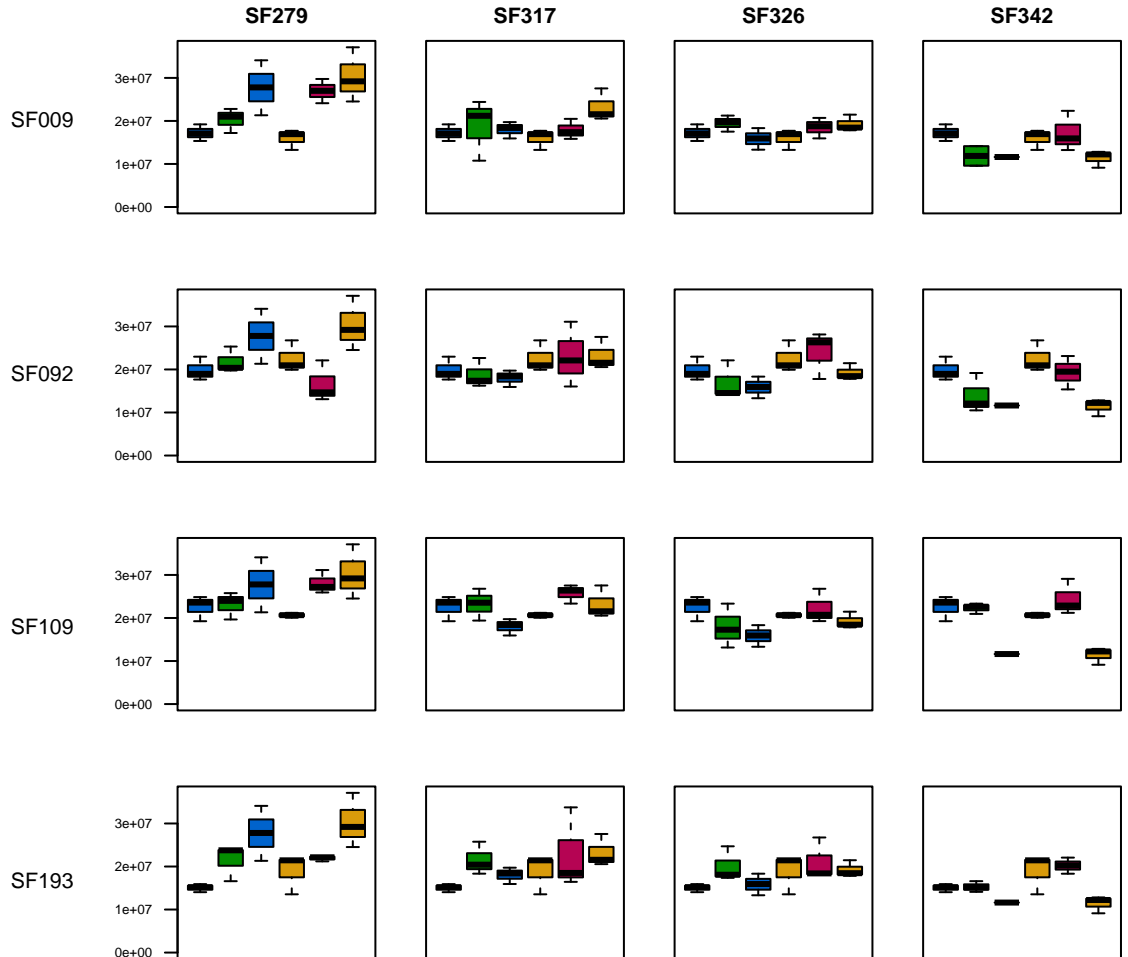

HanXRQChr16g0500391  
Probable membrane-associated 30 kDa  
protein, chloroplastic

Parents WW  
Parents WD  
Hybrids WW  
Hybrids WD

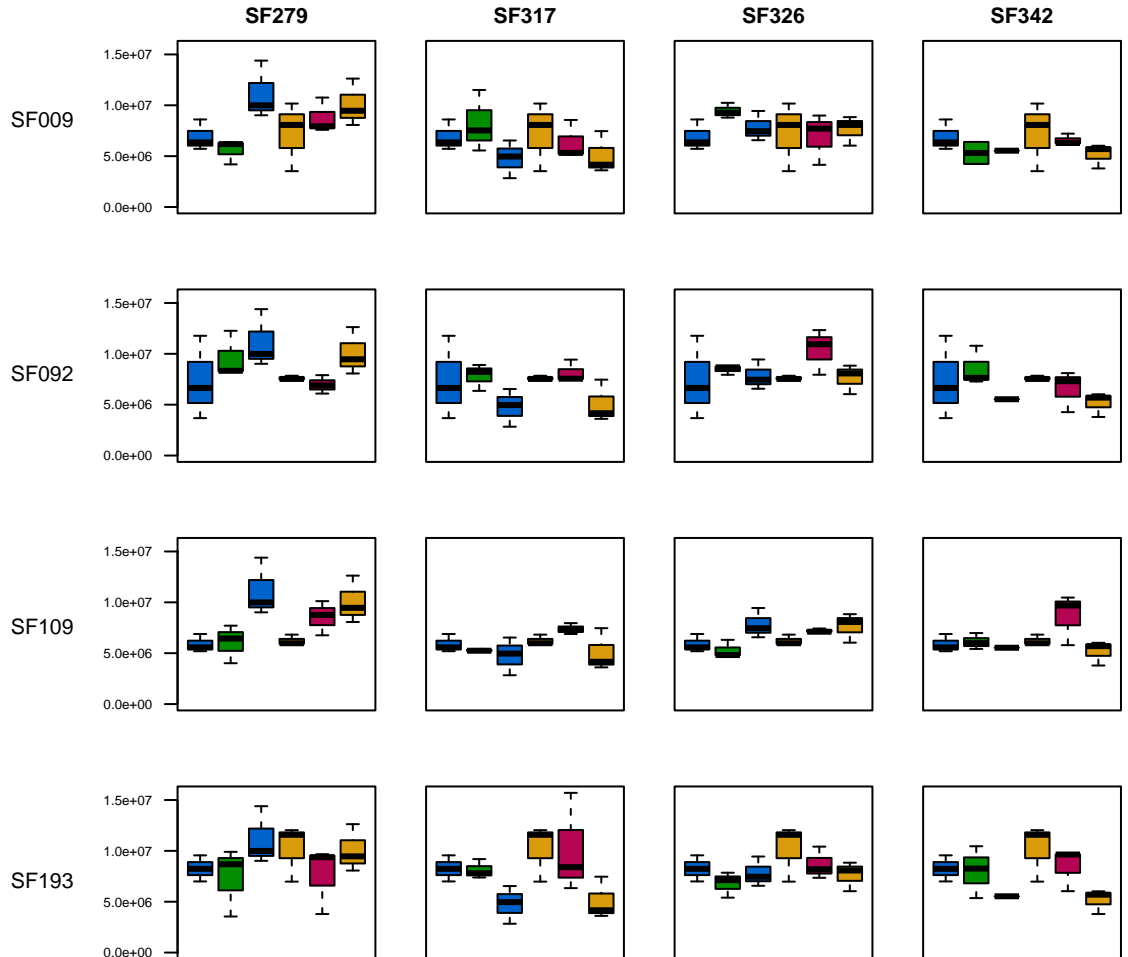

HanXRQChr06g0176631  
Probable fructose-1,6-bisphosphatase,  
chloroplastic

Parents WW  
Parents WD  
Hybrids WW  
Hybrids WD

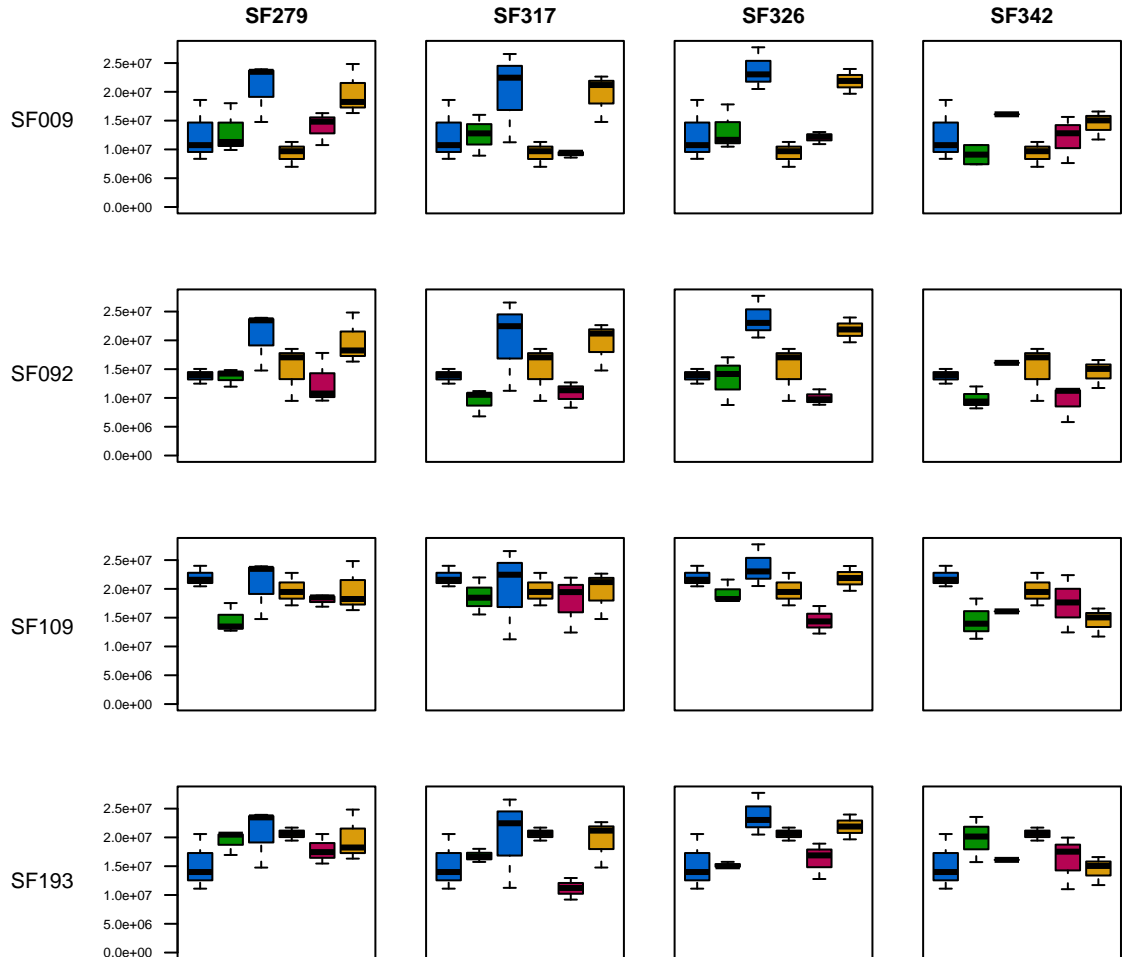

HanXRQChr03g0092611  
Putative chaperonin Cpn60/TCP-1 family;  
GroEL-like apical domain; GroEL-like equ

Parents WW  
Parents WD  
Hybrids WW  
Hybrids WD

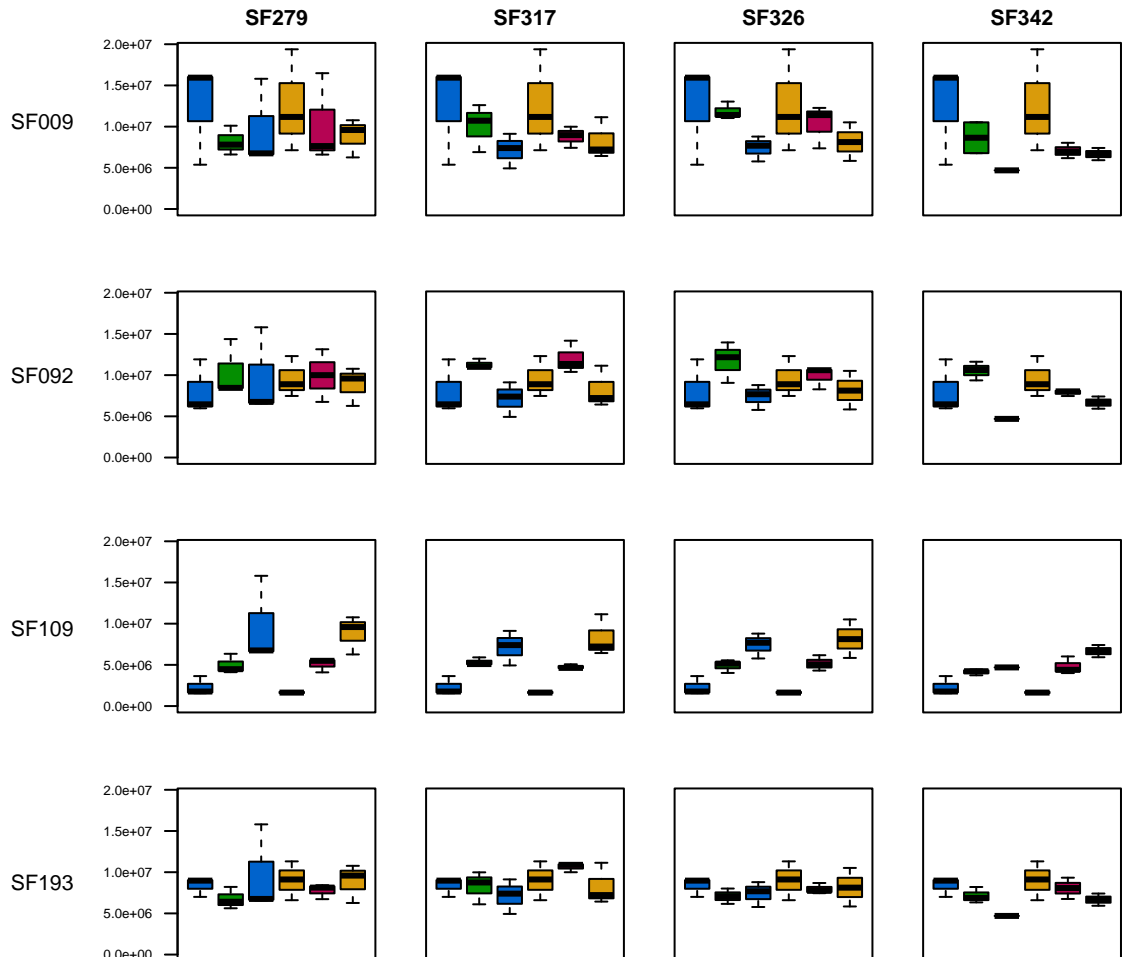

HanXRQChr05g0162961  
Probable 14-3-3-like protein C

Parents WW  
Parents WD  
Hybrids WW  
Hybrids WD

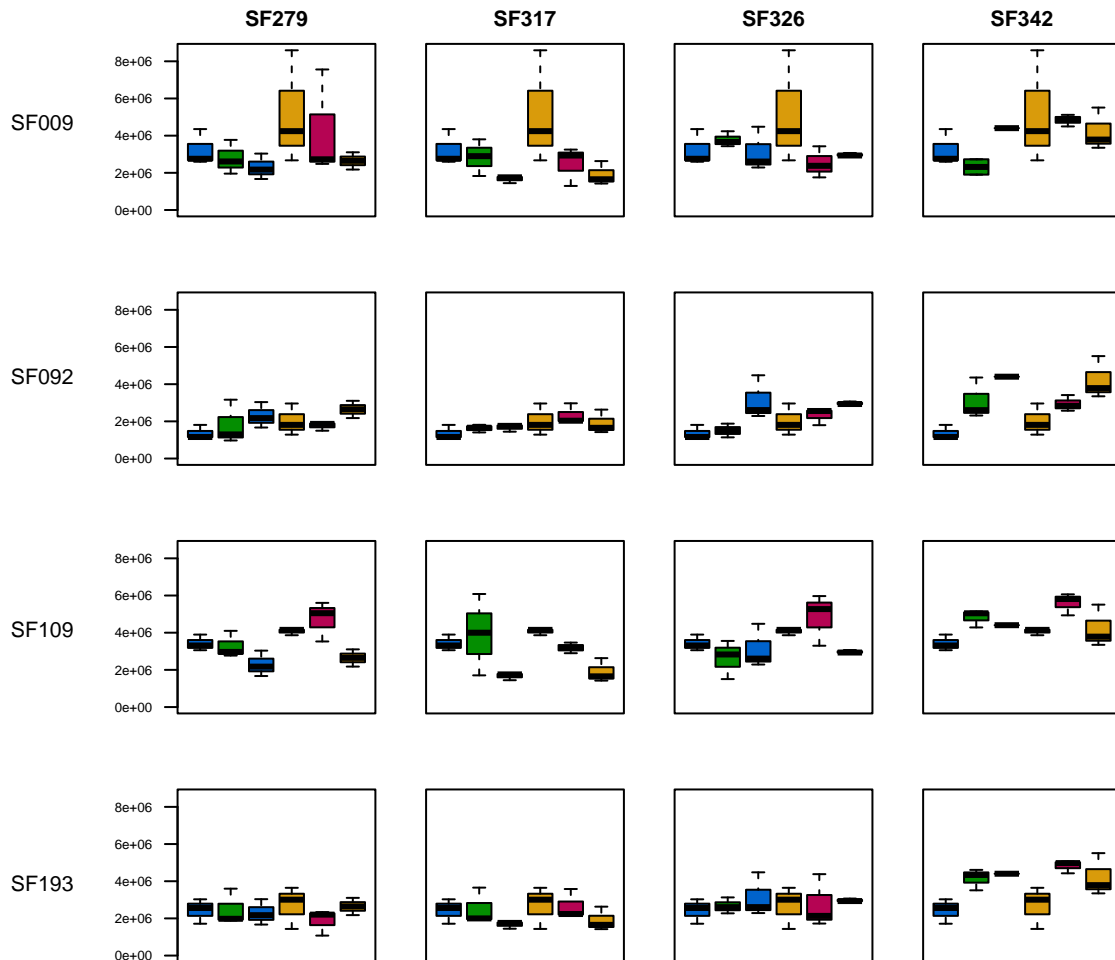



HanXRQChr06g0180721  
Putative sulphite reductase, ferredoxin  
dependent

Parents WW  
Parents WD  
Hybrids WW  
Hybrids WD

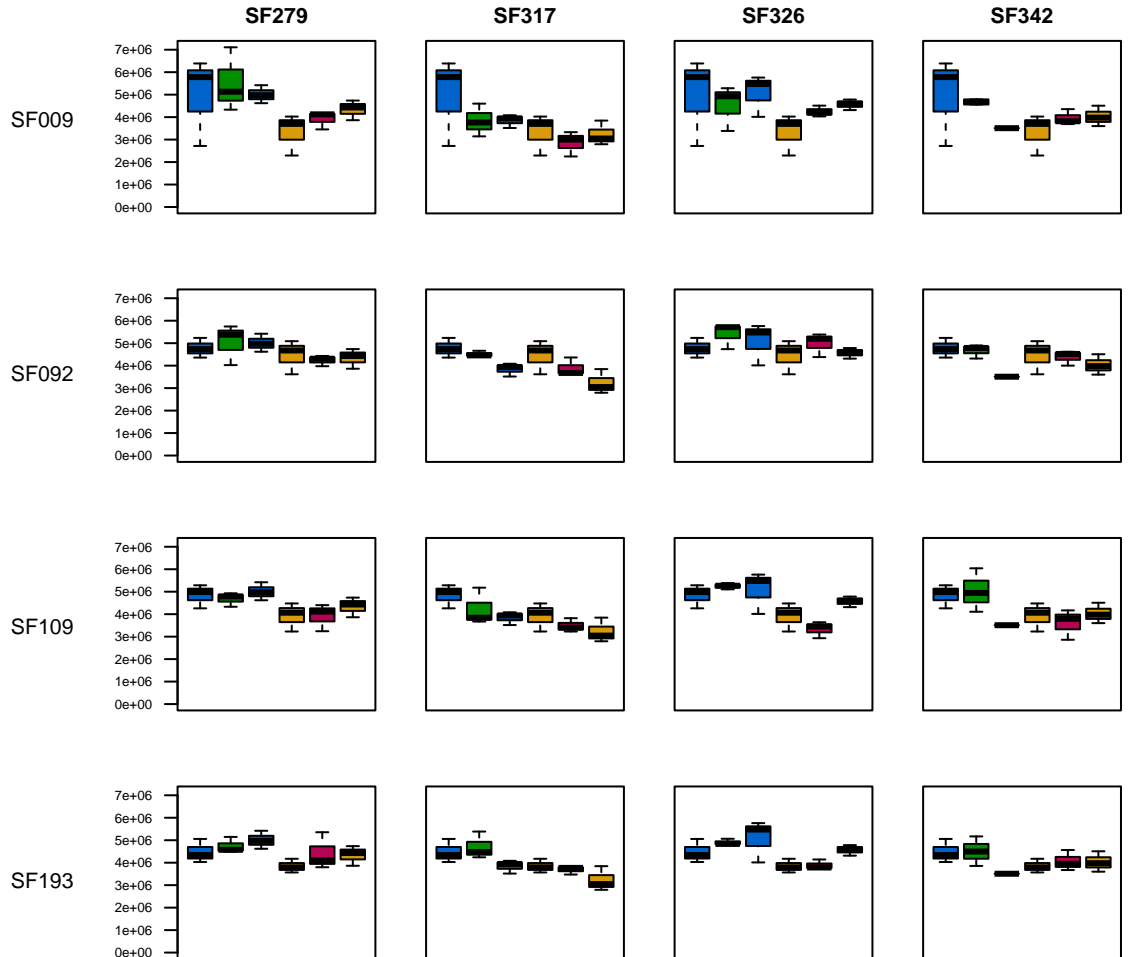

HanXRQChr16g0501521  
Probable proteasome alpha subunit F1

- Parents WW
- Parents WD
- Hybrids WW
- Hybrids WD

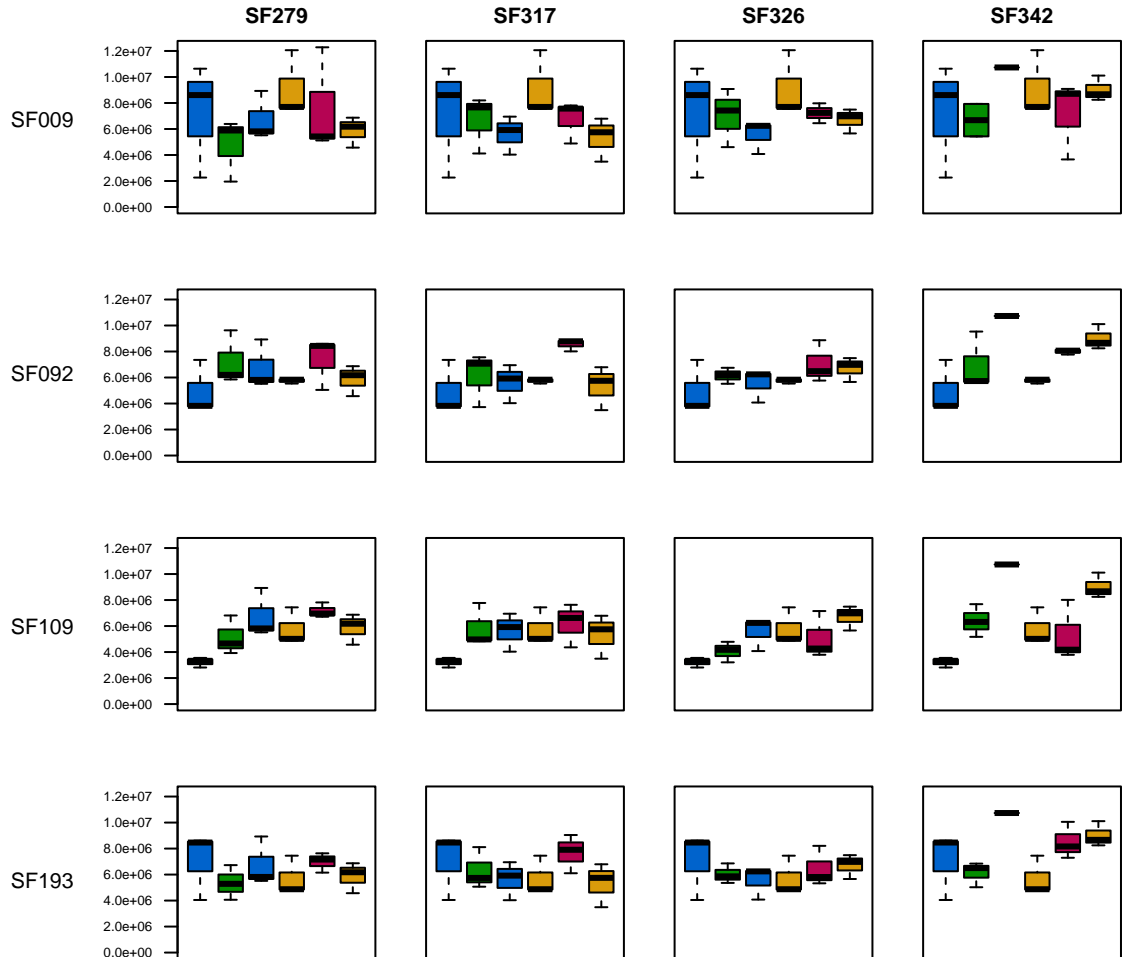

HanXRQChr05g0147841  
Putative ribosomal protein S25

Parents WW  
Parents WD  
Hybrids WW  
Hybrids WD

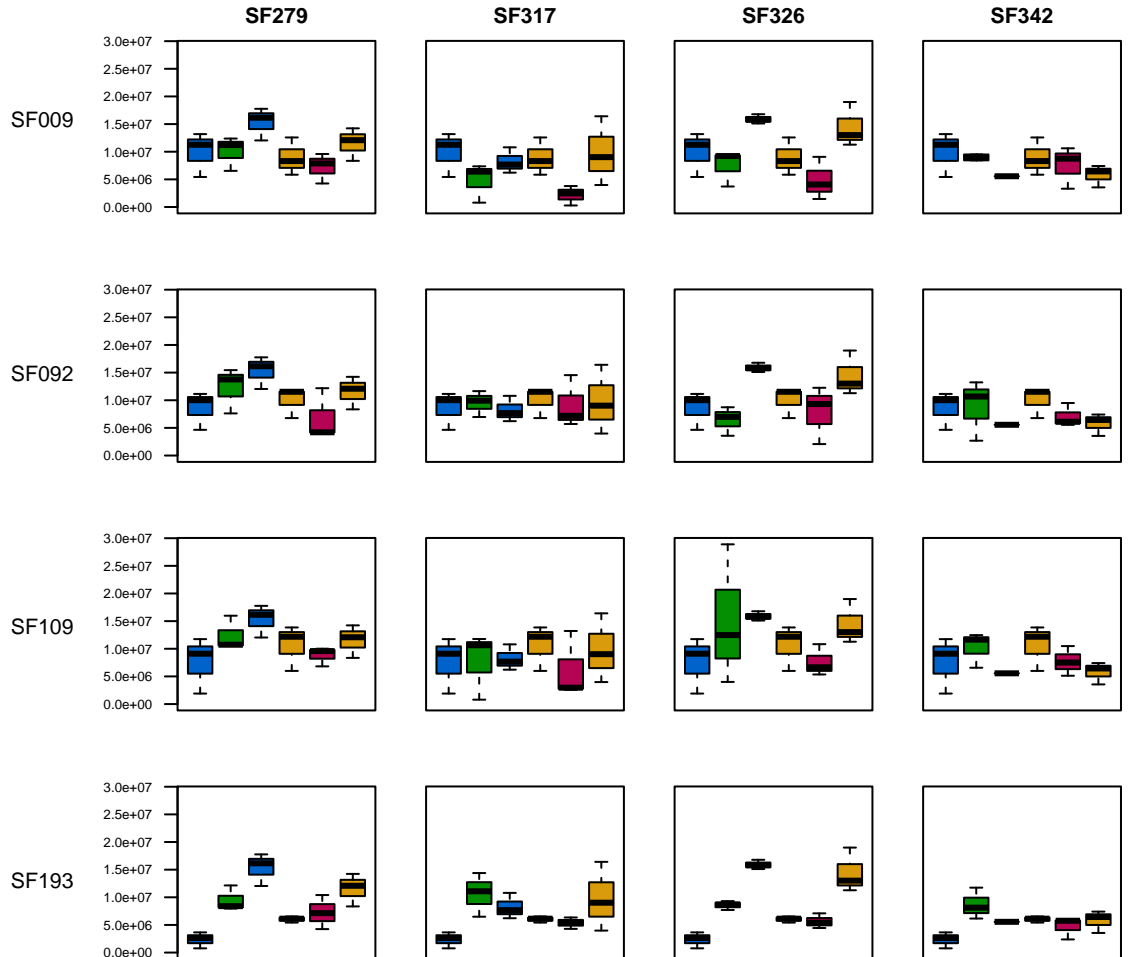

HanXRQChr04g0097881  
Probable post-illumination chlorophyll  
fluorescence increase

Parents WW  
Parents WD  
Hybrids WW  
Hybrids WD

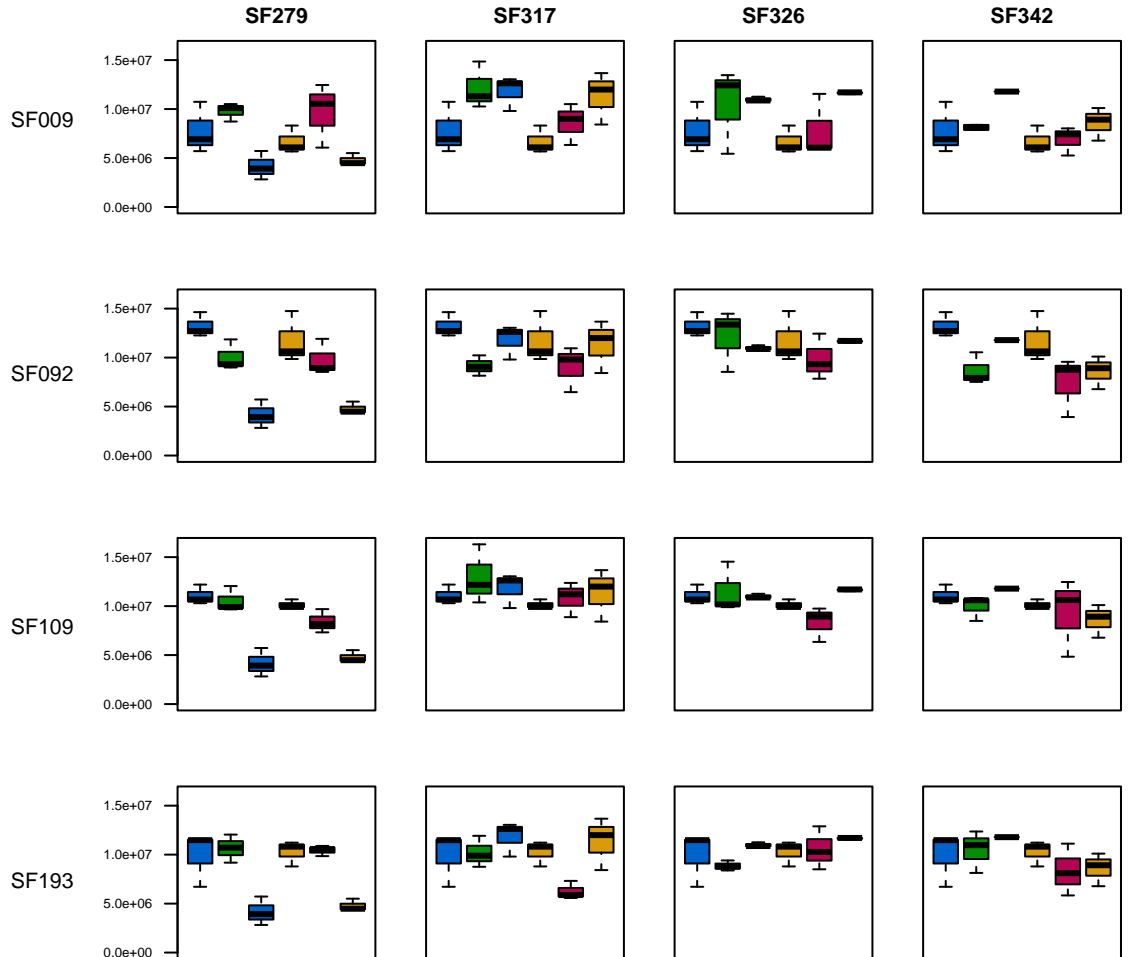

HanXRQChr07g0197131  
Putative cobalamin-independent  
methionine synthase

Parents WW  
Parents WD  
Hybrids WW  
Hybrids WD

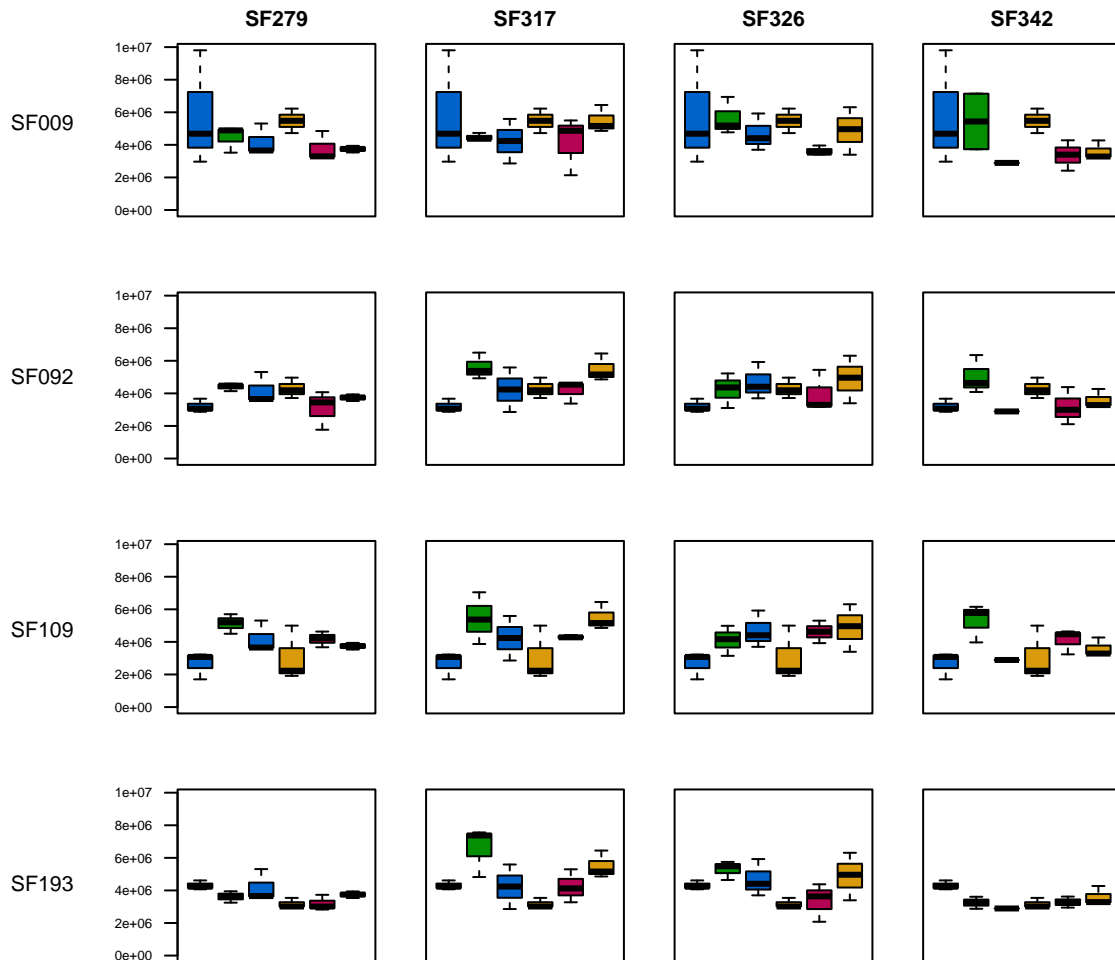

HanXRQChr15g0493751  
Probable melibiase family protein

Parents WW  
Parents WD  
Hybrids WW  
Hybrids WD

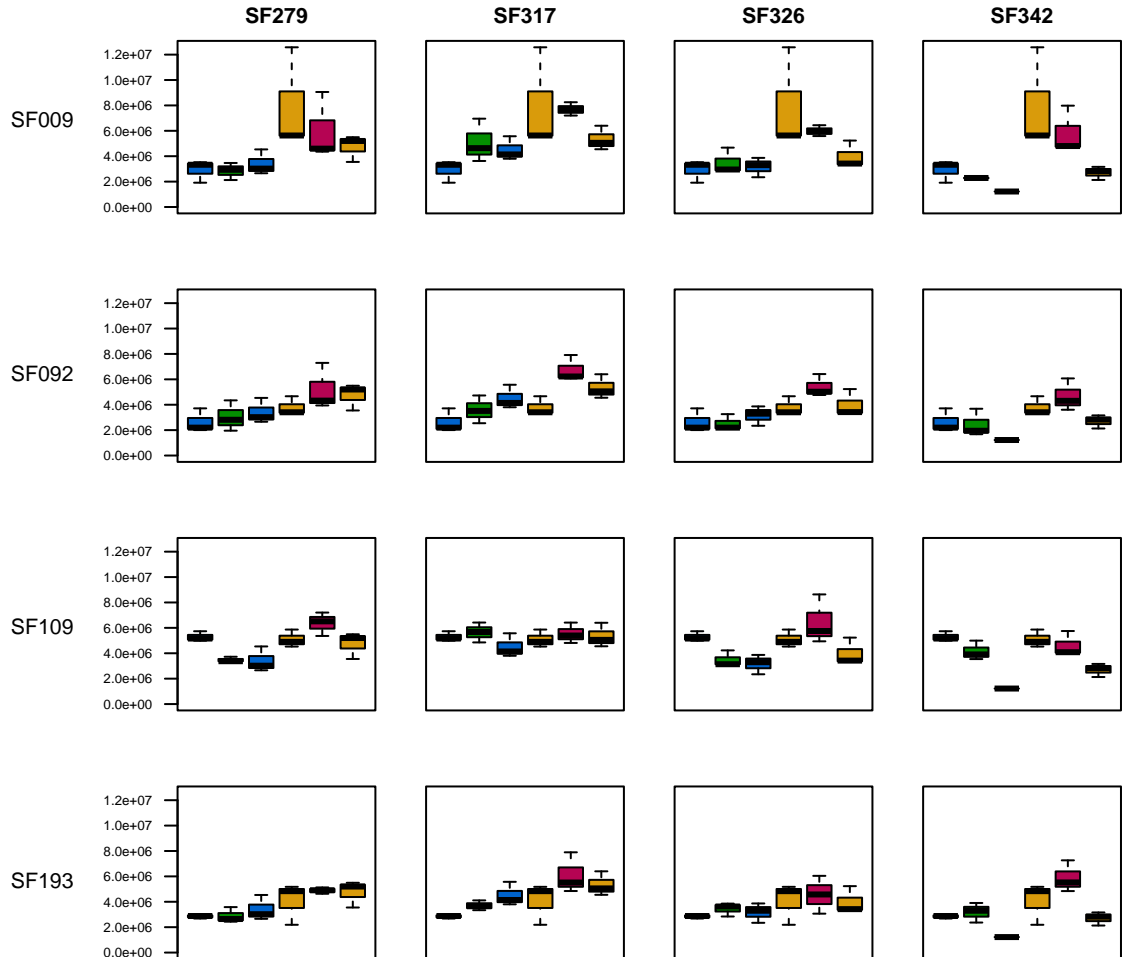

HanXRQChr04g0094101  
Probable coatomer, beta subunit

Parents WW  
Parents WD  
Hybrids WW  
Hybrids WD

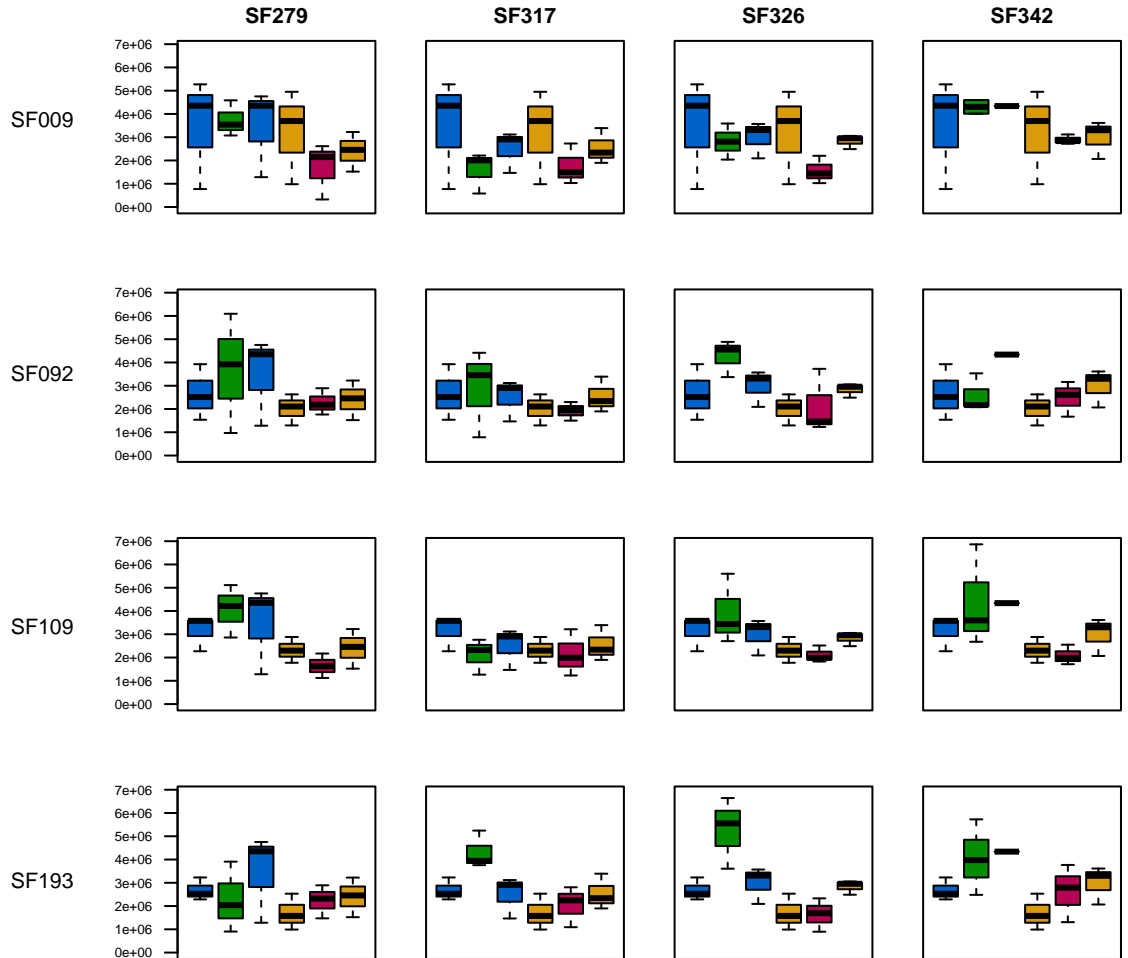

HanXRQChr13g0408821  
Putative reversibly glycosylated  
polypeptide family; Nucleotide-diphospho-

■ Parents WW  
■ Parents WD  
■ Hybrids WW  
■ Hybrids WD

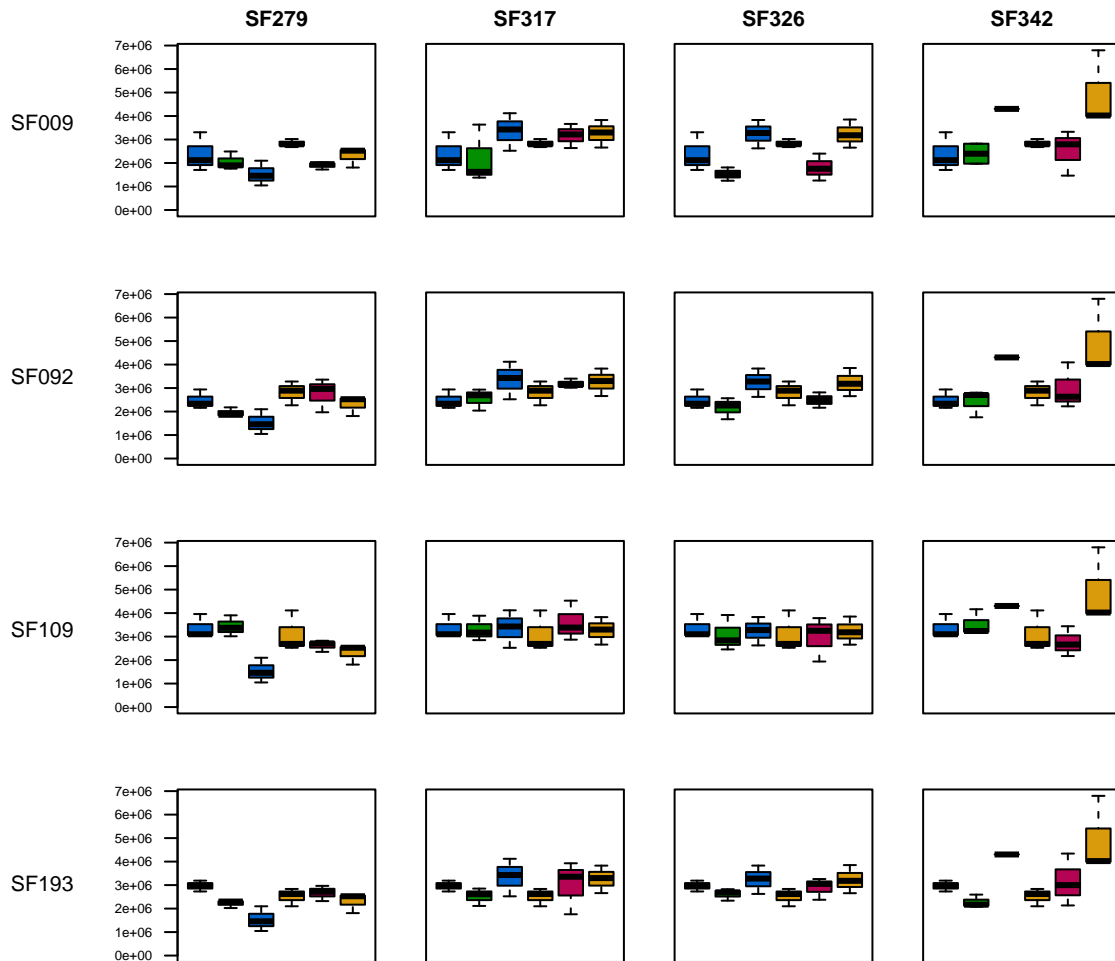



HanXRQChr13g0406621  
Probable violaxanthin de-epoxidase,  
chloroplastic

Parents WW  
Parents WD  
Hybrids WW  
Hybrids WD

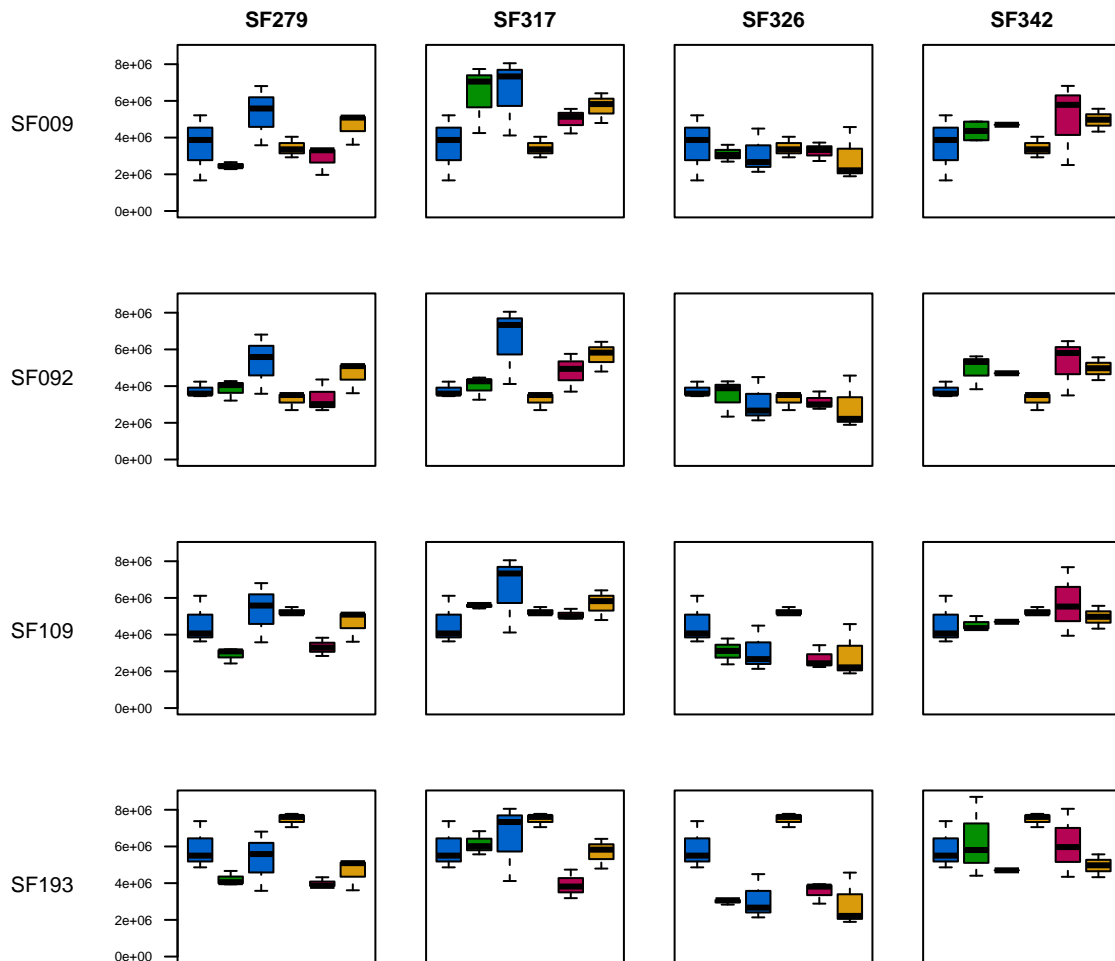

HanXRQChr07g0190981  
Probable branched-chain amino acid  
aminotransferase 5 / branched-chain amin

Parents WW  
Parents WD  
Hybrids WW  
Hybrids WD

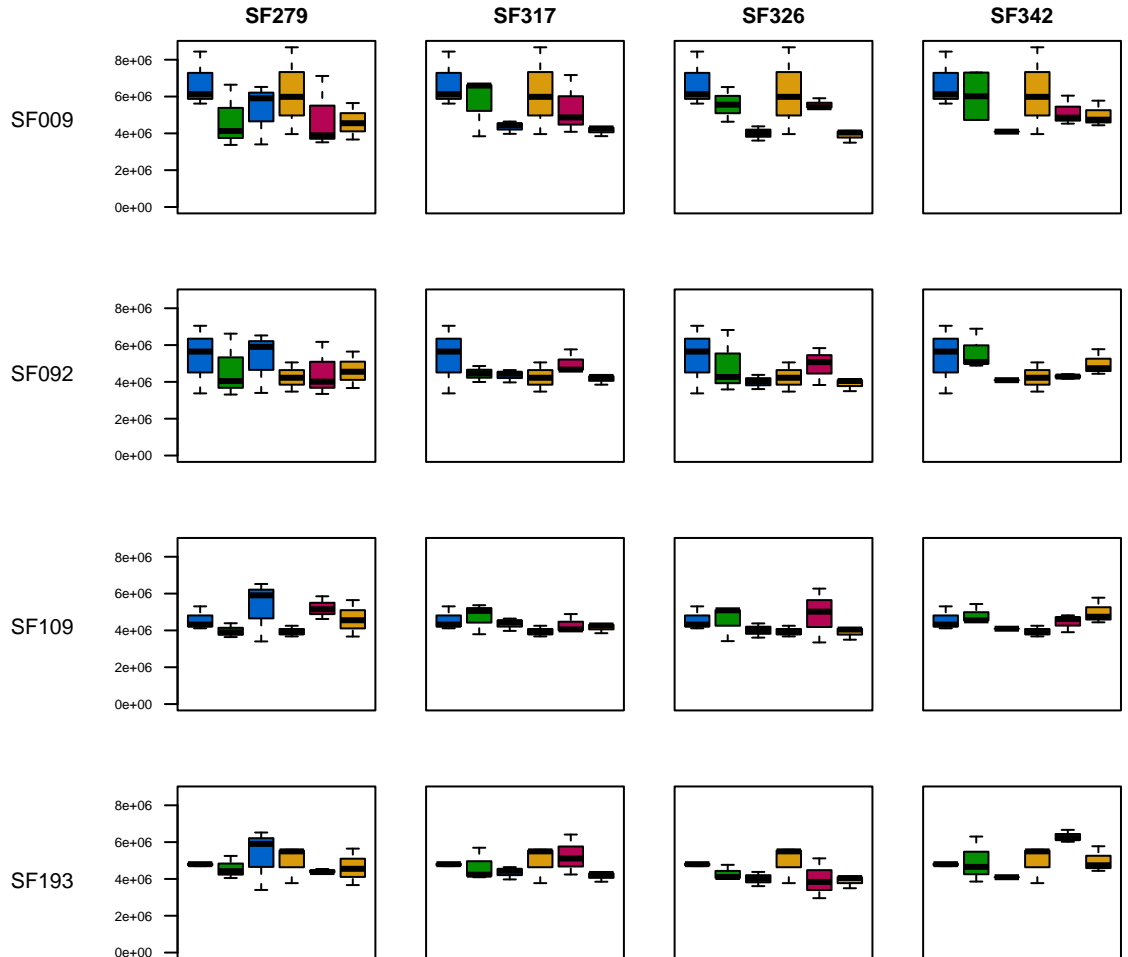

HanXRQChr13g0408181  
Probable small ubiquitin-related  
modifier 1

Parents WW  
Parents WD  
Hybrids WW  
Hybrids WD

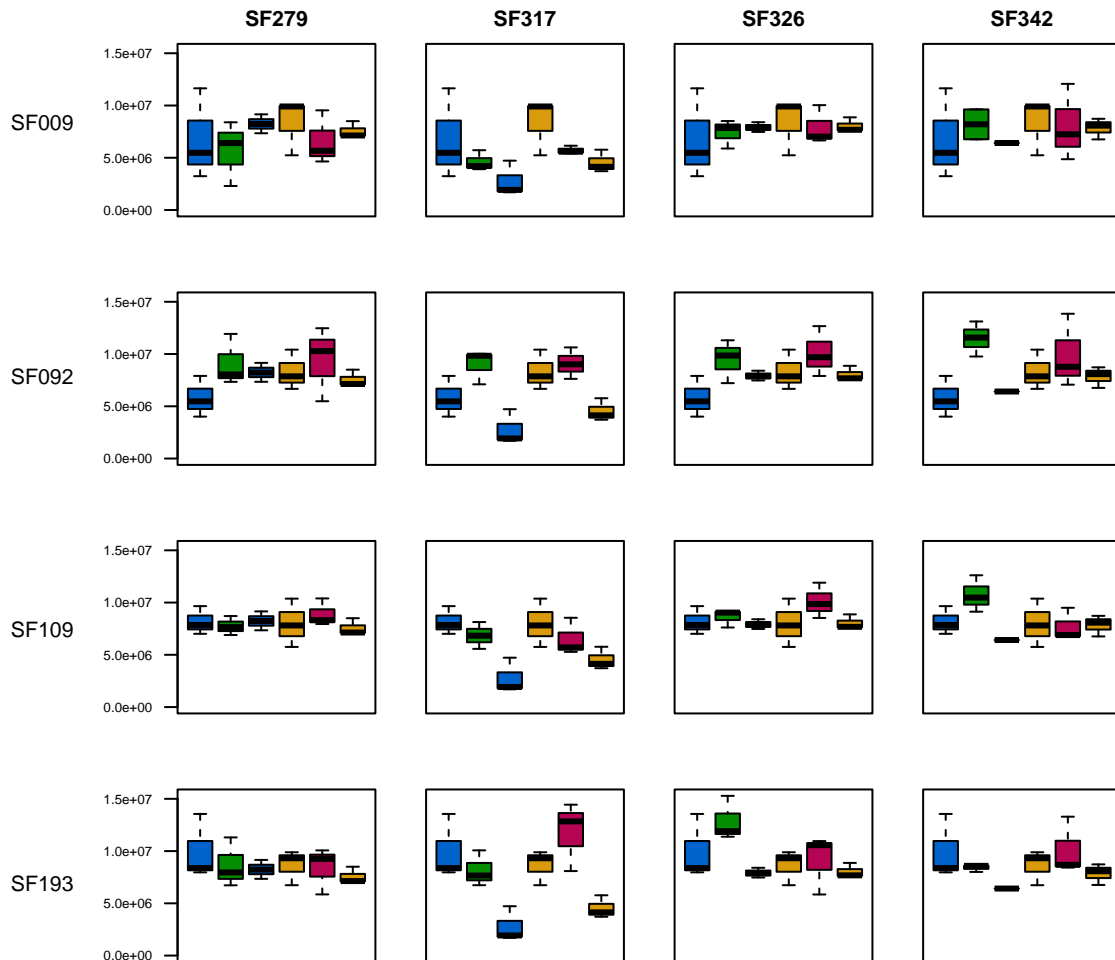

HanXRQChr16g0509271  
Probable CLP protease proteolytic  
subunit 1

Parents WW  
Parents WD  
Hybrids WW  
Hybrids WD

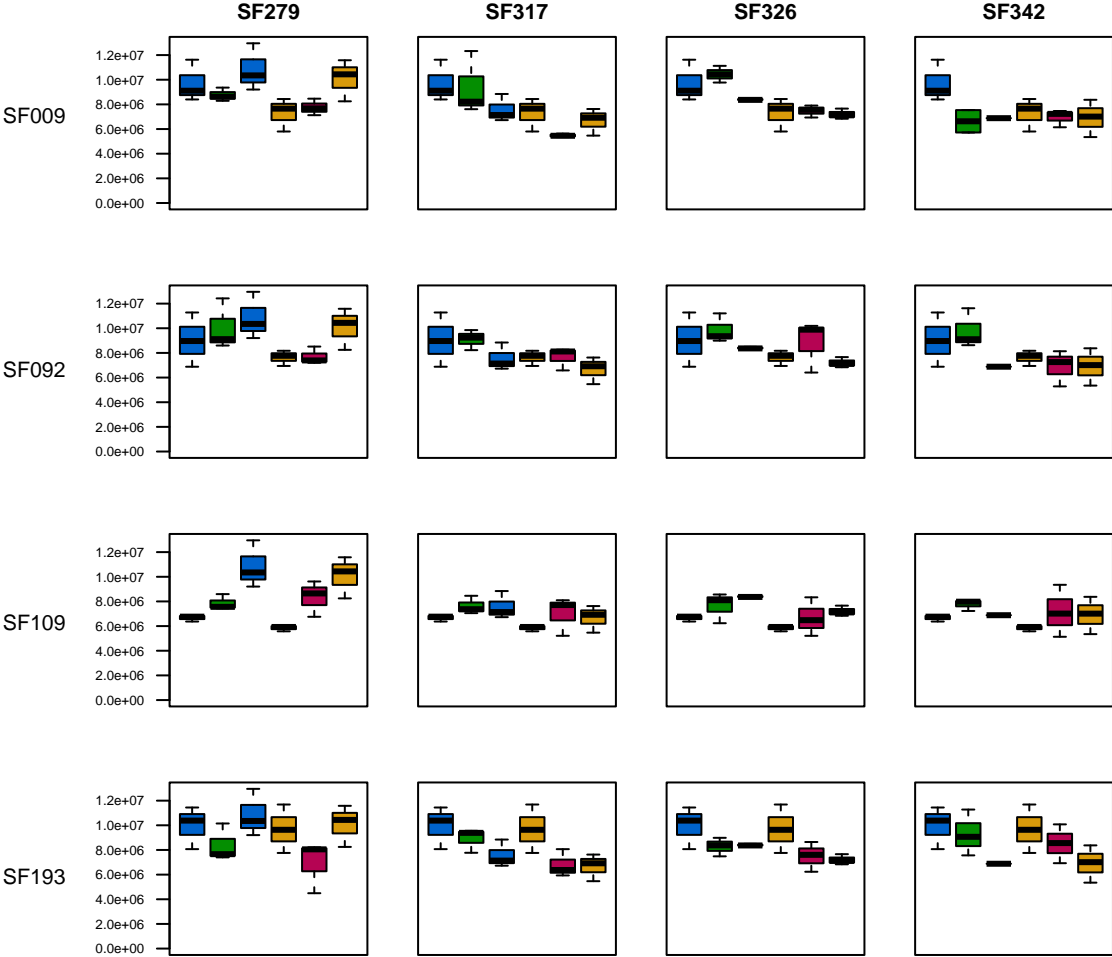

HanXRQChr09g0246081  
Putative ankyrin repeat-containing  
domain

Parents WW  
Parents WD  
Hybrids WW  
Hybrids WD

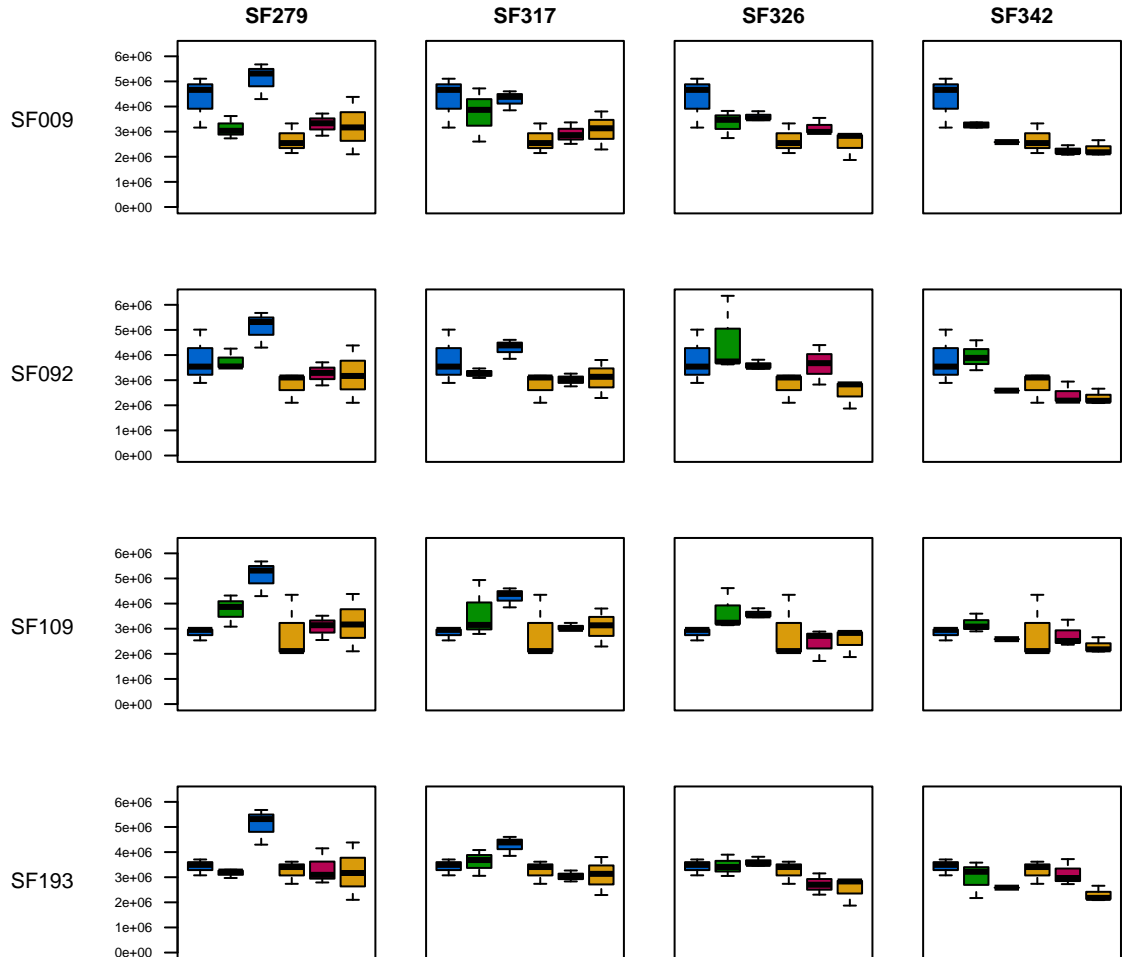

HanXRQChr09g0264741  
Probable expansin A10

Parents WW  
Parents WD  
Hybrids WW  
Hybrids WD

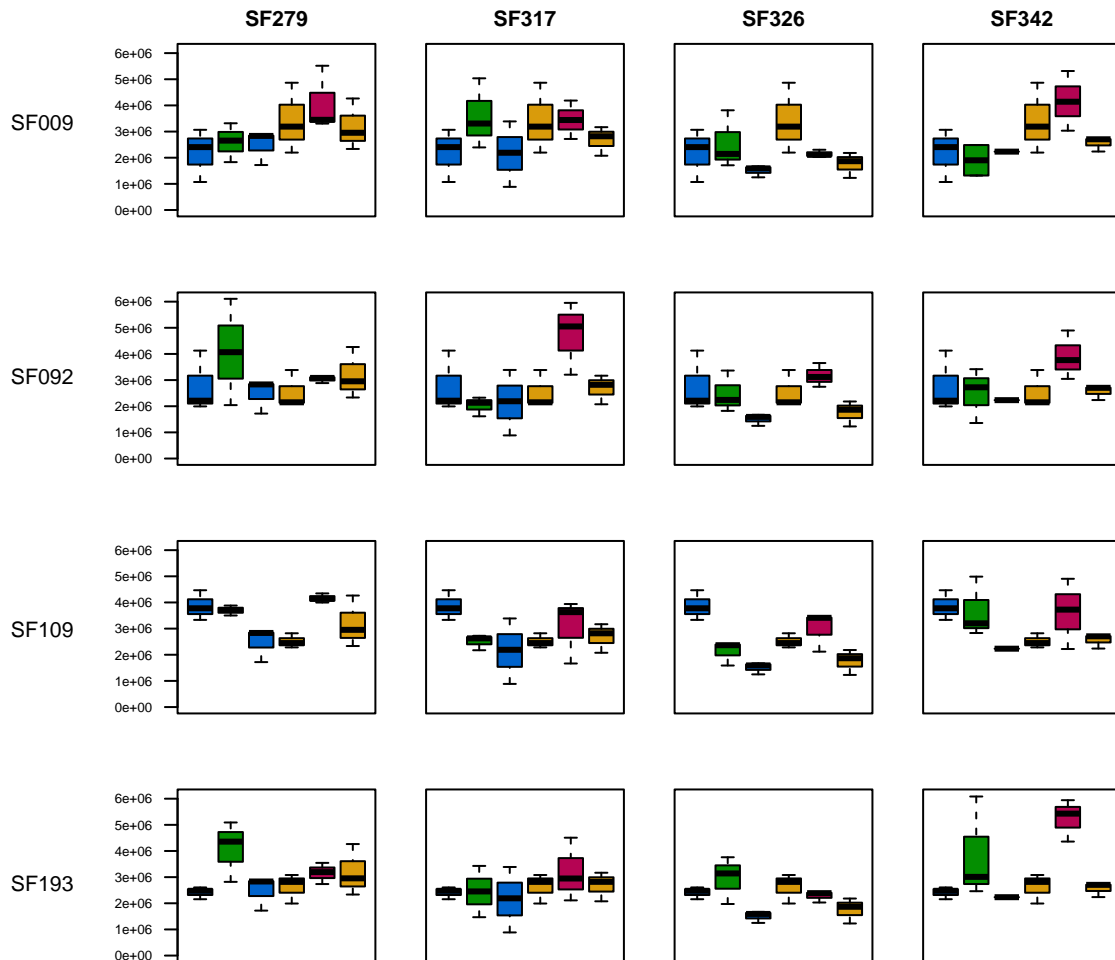

HanXRQChr17g0565401  
Probable aspartate aminotransferase 1

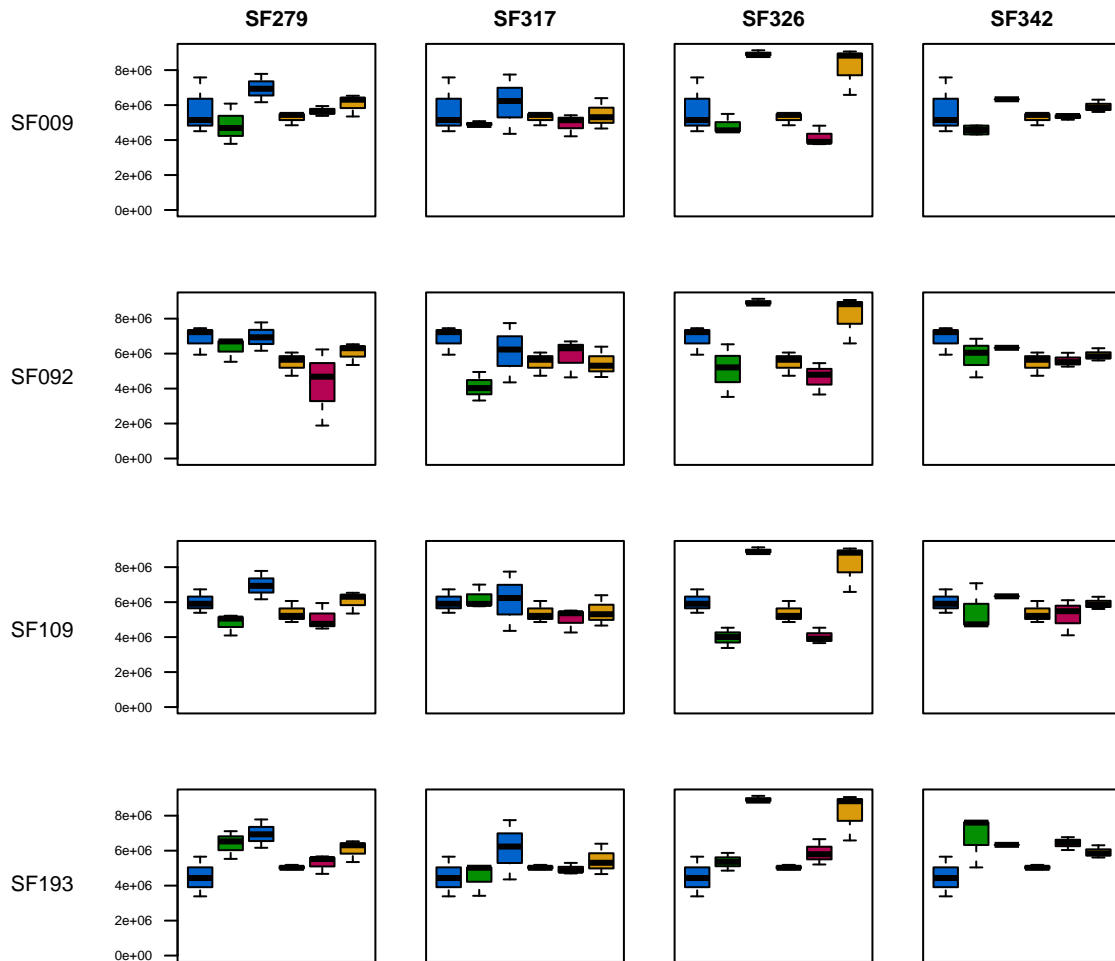

HanXRQChr01g0015011  
Putative ribosomal protein L14b/L23e;  
Ribosomal protein L14 domain

Parents WW  
Parents WD  
Hybrids WW  
Hybrids WD

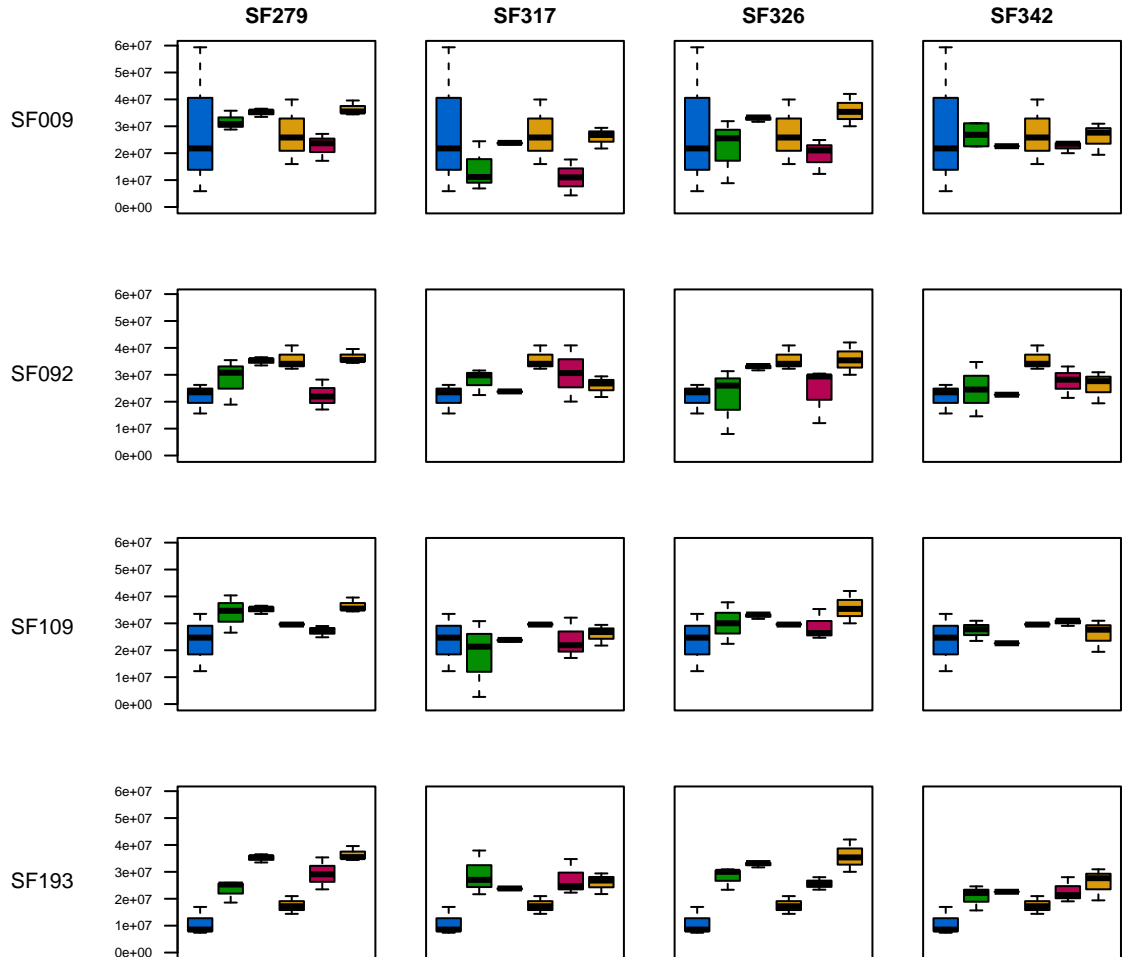



HanXRQChr10g0310311  
 Probable NAD(P)-binding Rossmann-fold  
 superfamily protein

Parents WW  
 Parents WD  
 Hybrids WW  
 Hybrids WD

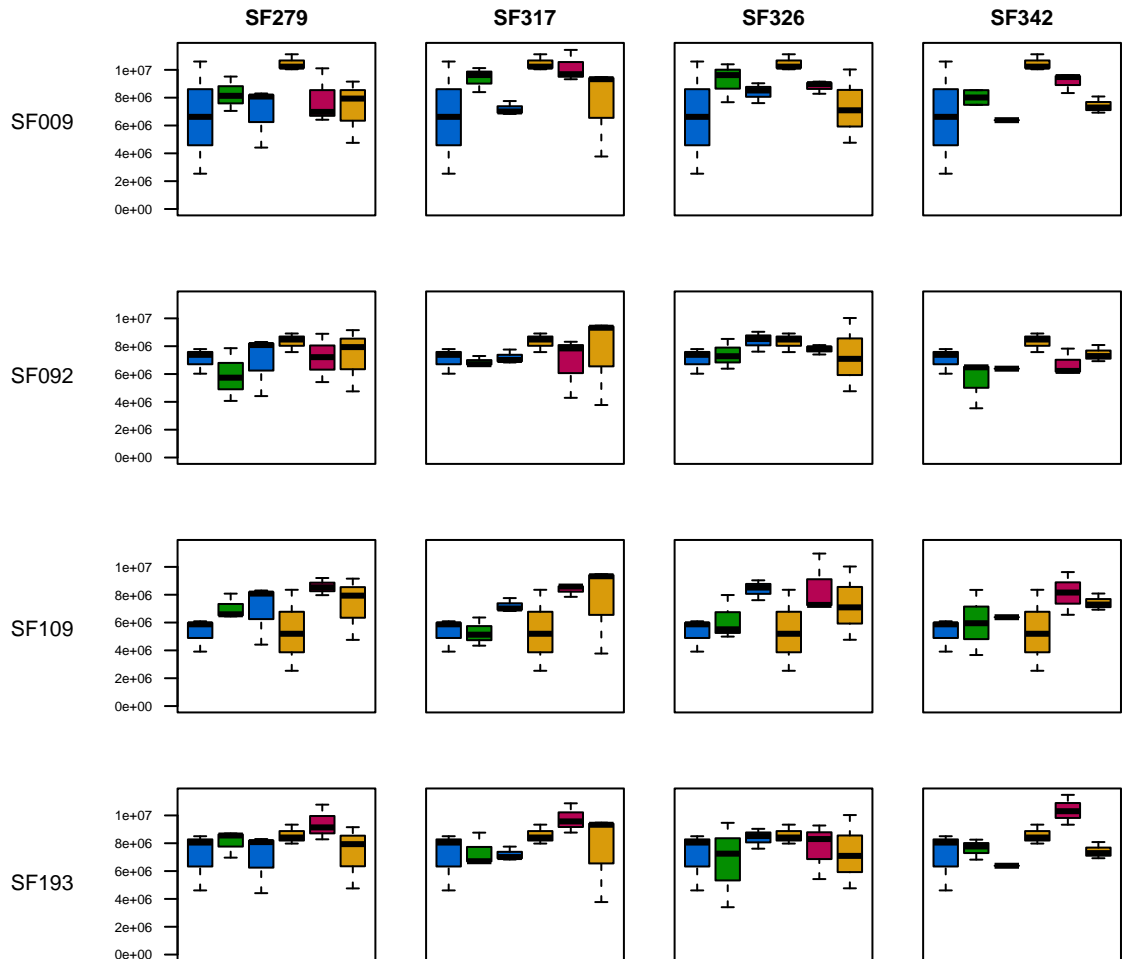

HanXRQChr03g0064801  
 Probable NADP-dependent  
 glyceraldehyde-3-phosphate dehydrogenase

Parents WW  
 Parents WD  
 Hybrids WW  
 Hybrids WD

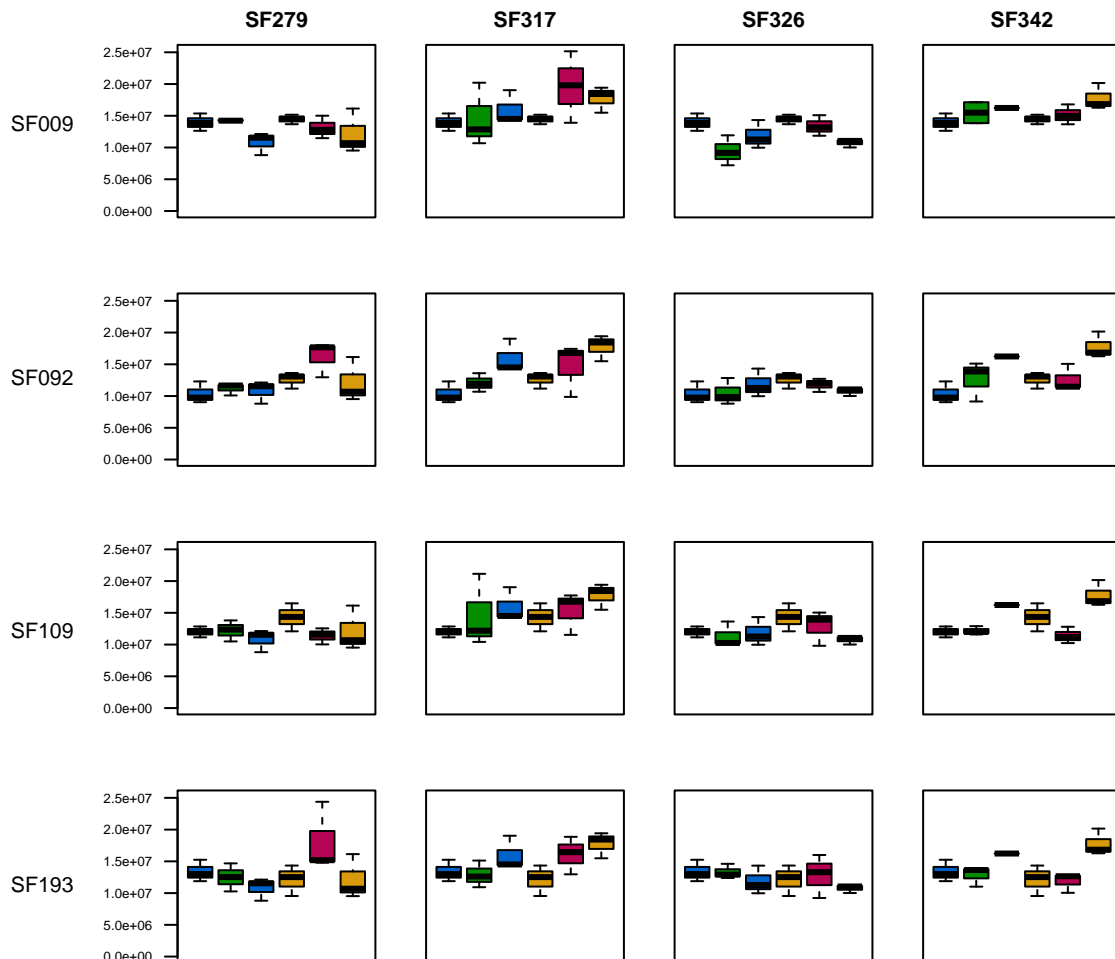

HanXRQChr14g0445801  
Probable aspartic proteinase

Parents WW  
Parents WD  
Hybrids WW  
Hybrids WD

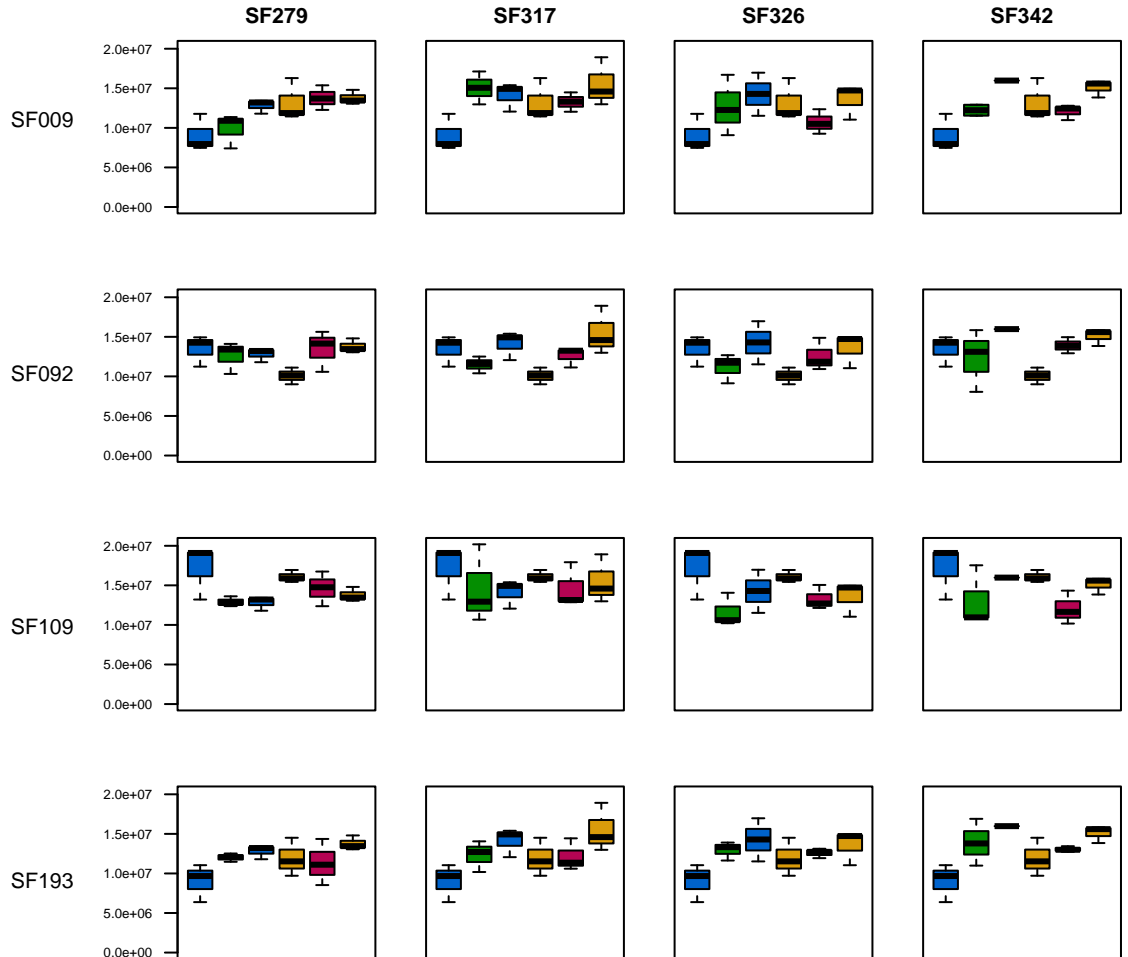

HanXRQChr17g0534321  
Probable luminal-binding protein

Parents WW  
Parents WD  
Hybrids WW  
Hybrids WD

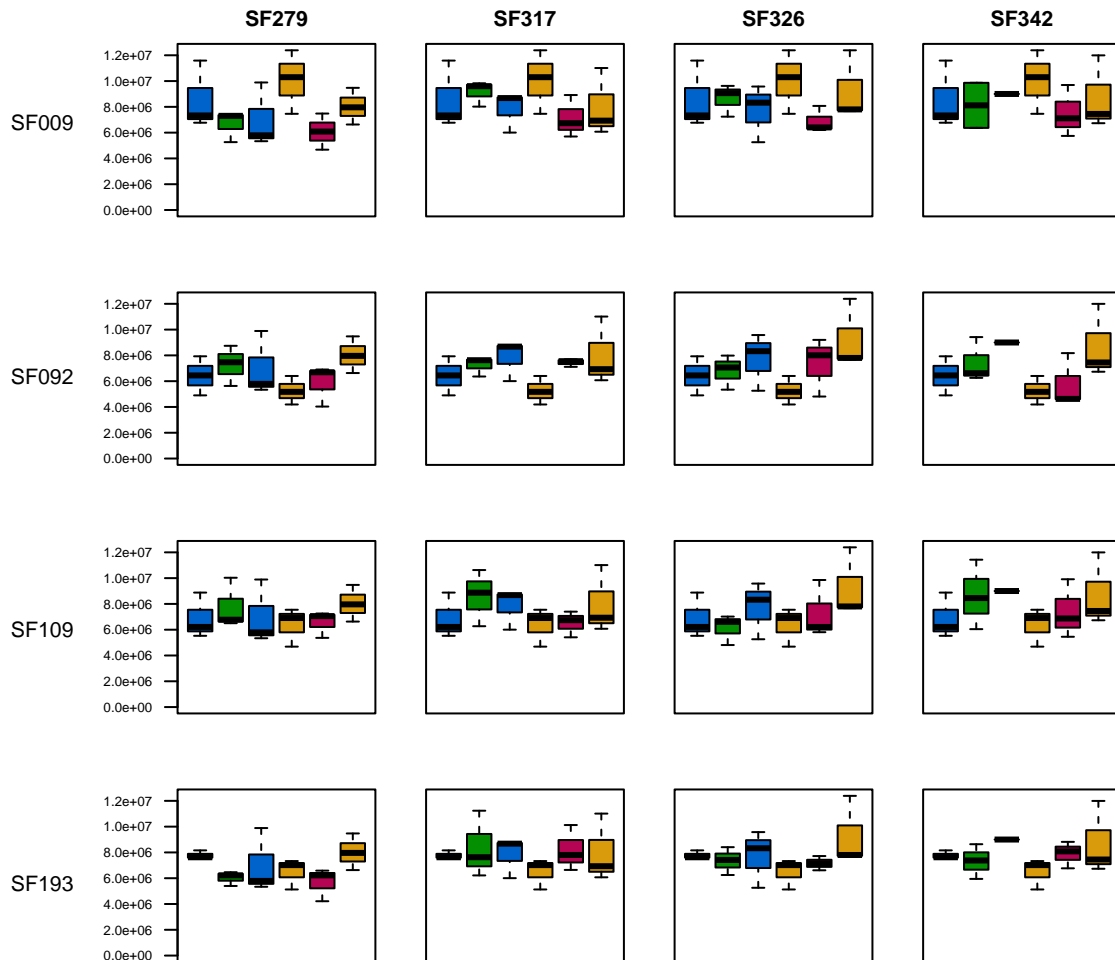

HanXRQChr05g0150481  
Probable WPP domain protein 1

Parents WW  
Parents WD  
Hybrids WW  
Hybrids WD

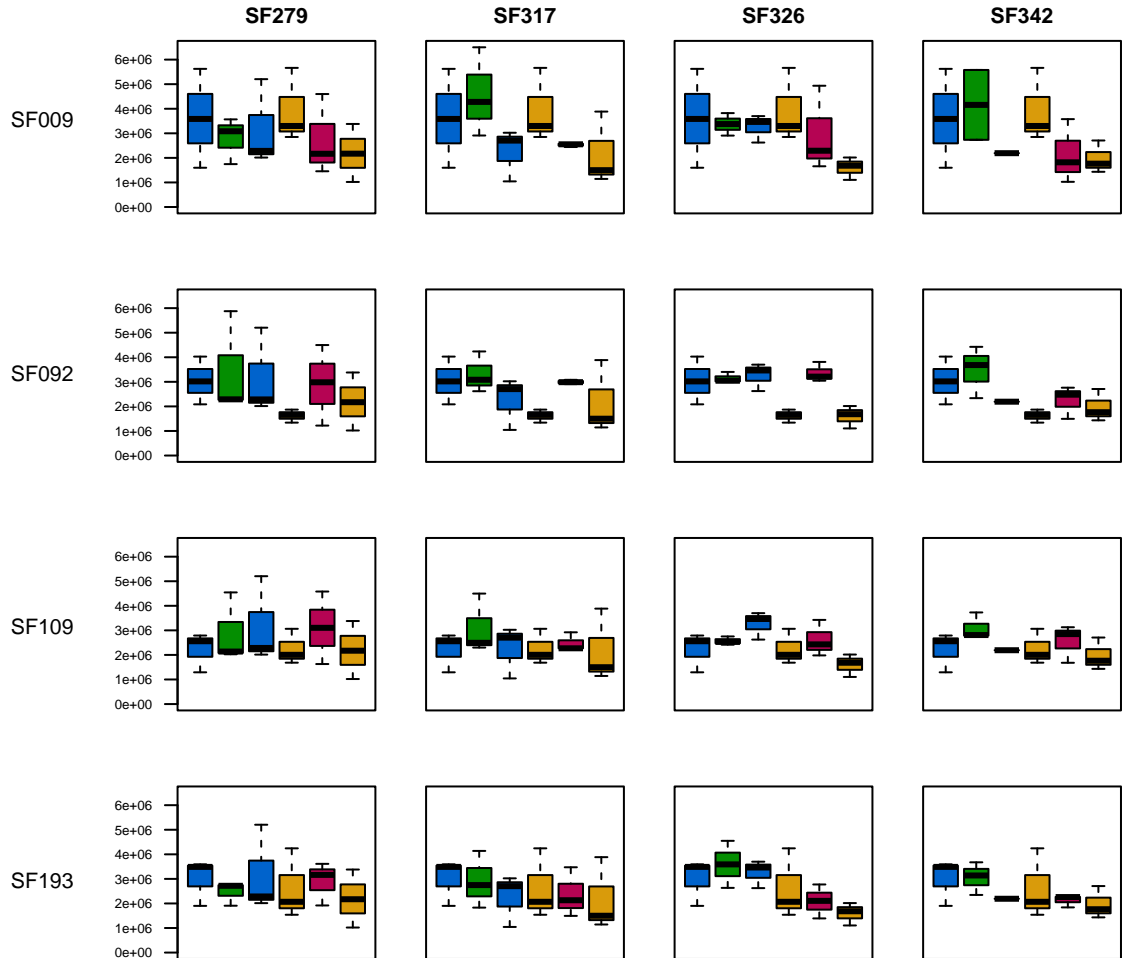

HanXRQChr16g0512701  
Probable enolase

Parents WW  
Parents WD  
Hybrids WW  
Hybrids WD

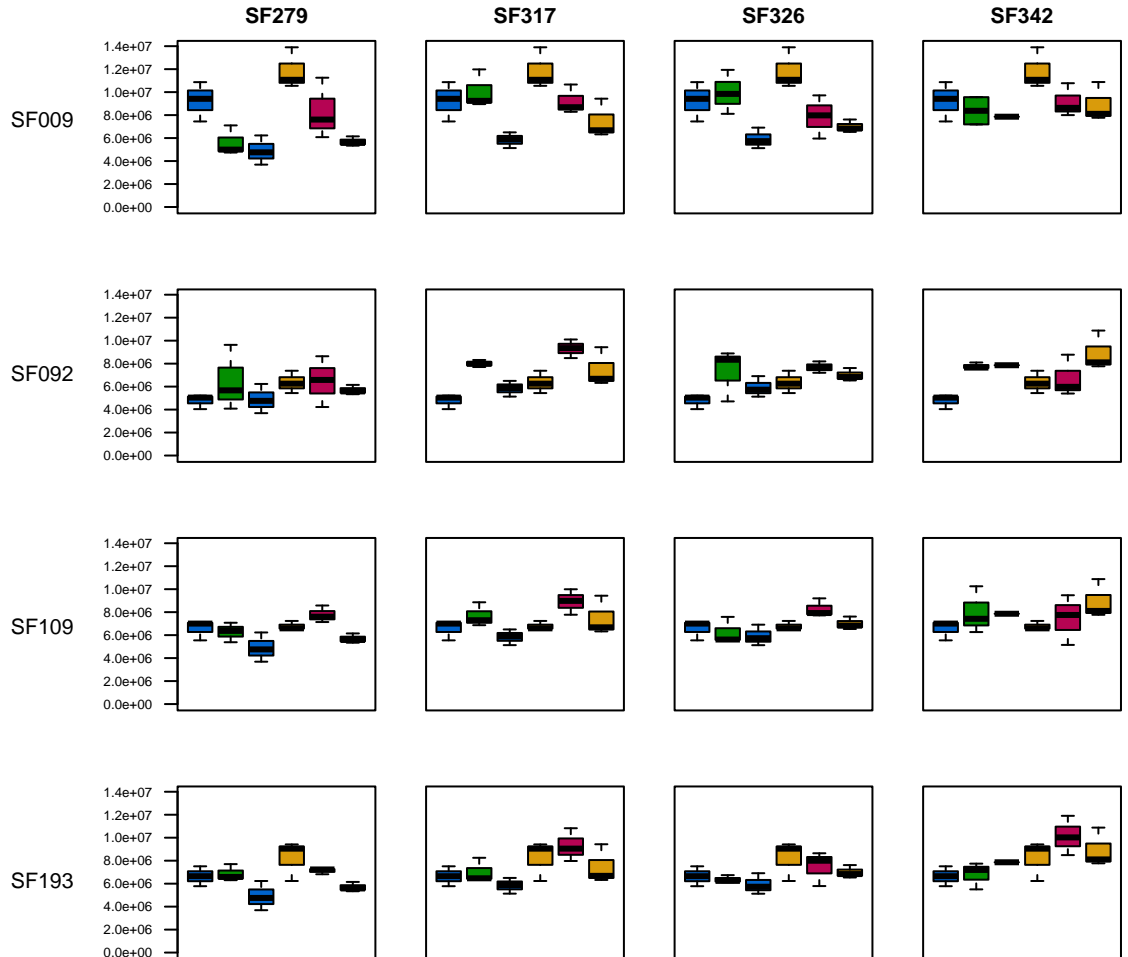

HanXRQChr04g0107551  
 Probable photosystem I reaction center  
 subunit PSI-N, chloroplast, putative / PSI-N

Parents WW  
 Parents WD  
 Hybrids WW  
 Hybrids WD

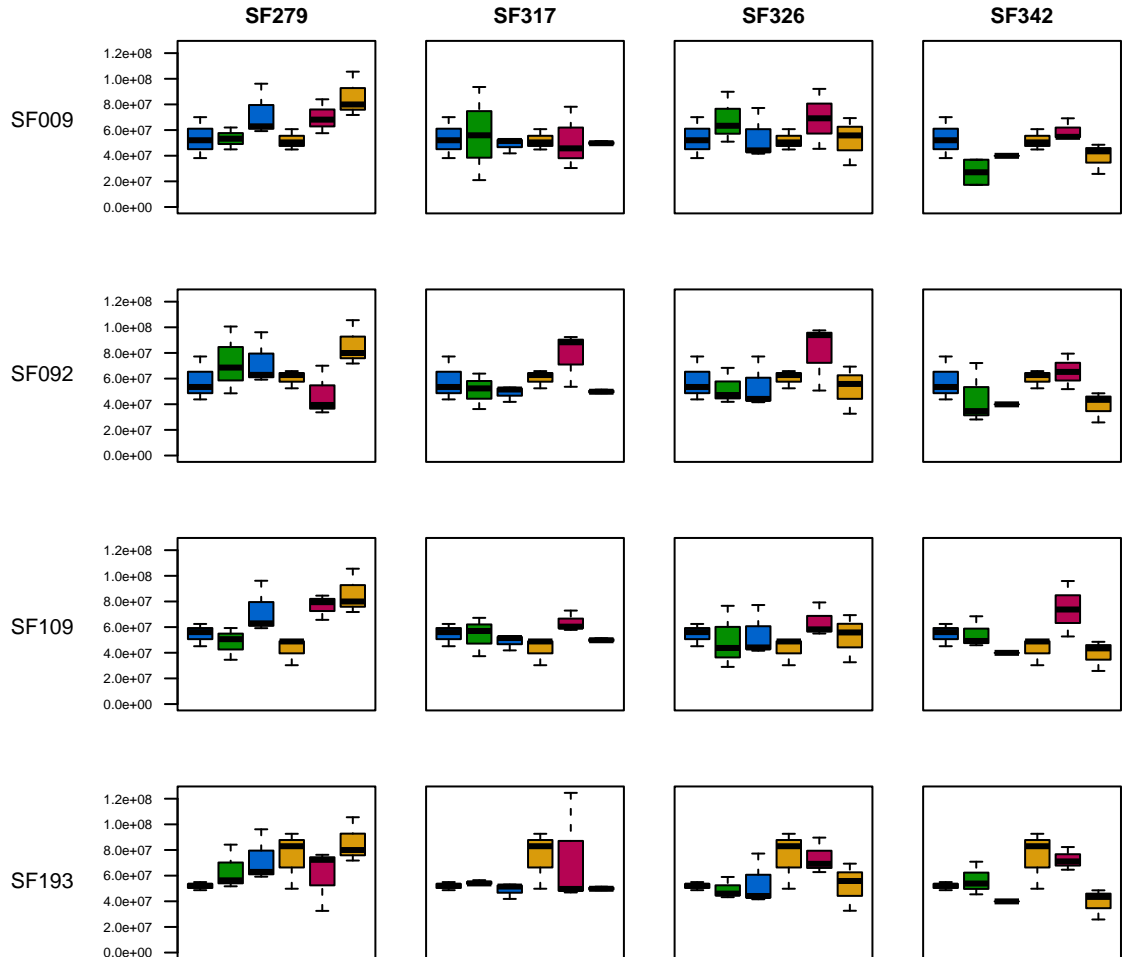

HanXRQChr03g0093501  
 Probable NAD-dependent malic enzyme 5f  
 kDa isoform, mitochondrial

Parents WW  
 Parents WD  
 Hybrids WW  
 Hybrids WD

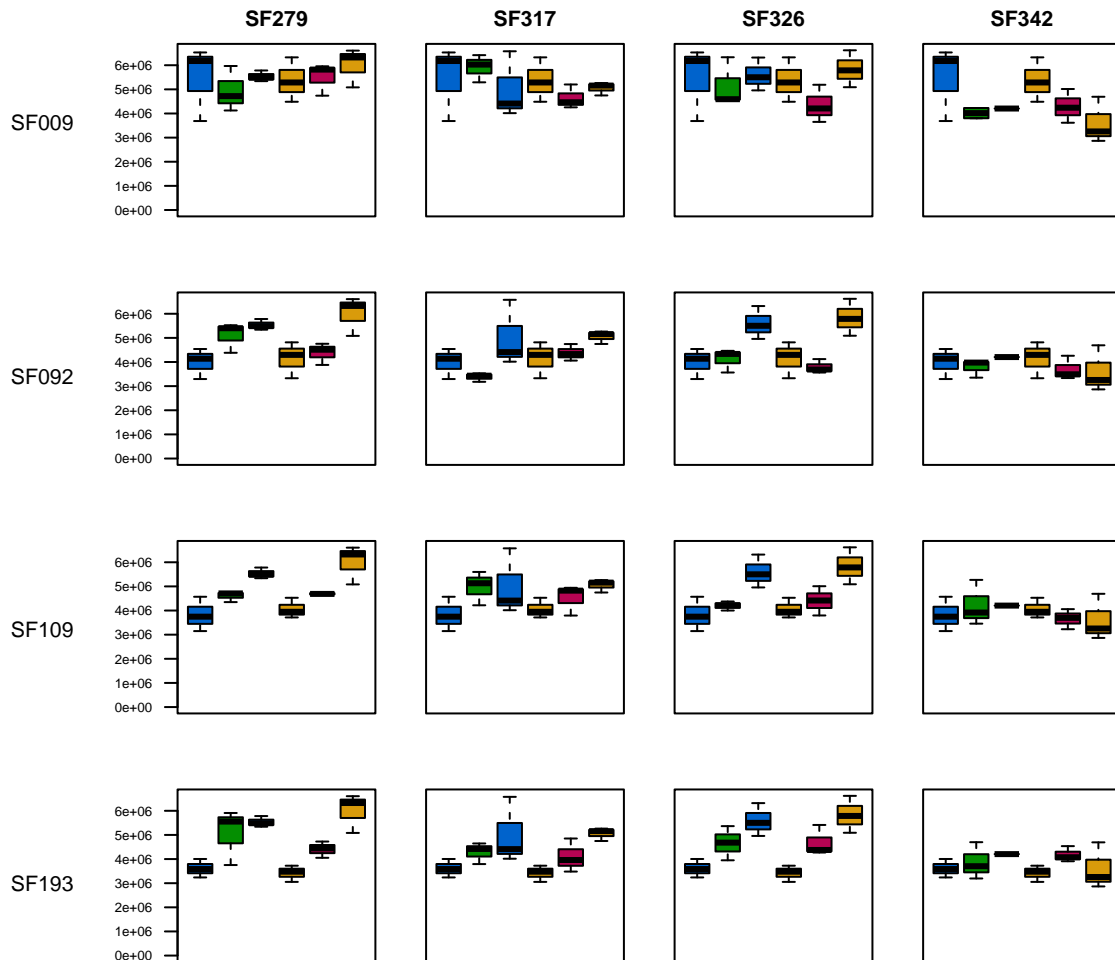



HanXRQChr13g0408831  
 Probable phosphoglycerate kinase,  
 chloroplastic

Parents WW  
 Parents WD  
 Hybrids WW  
 Hybrids WD

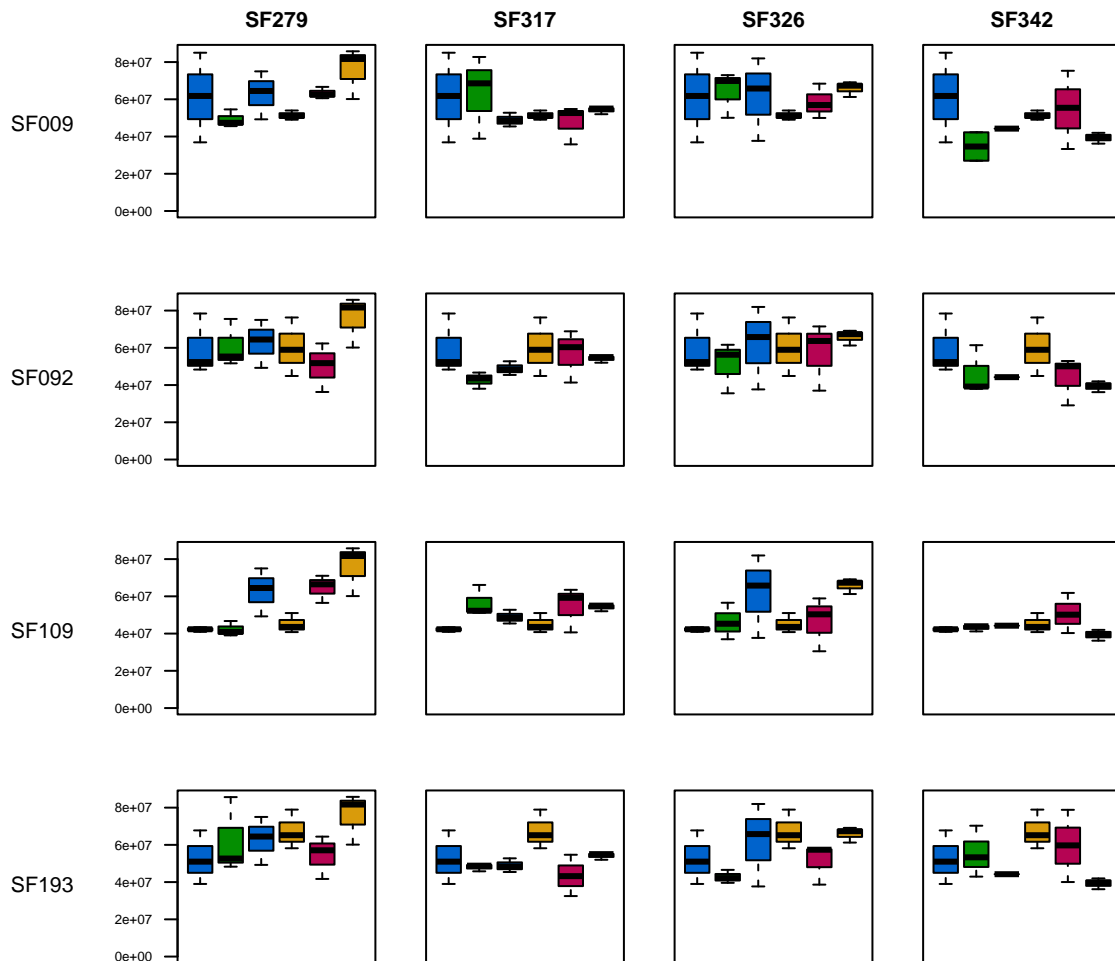

HanXRQChr04g0127831  
Probable pyridoxal-dependent  
decarboxylase family protein

Parents WW  
Parents WD  
Hybrids WW  
Hybrids WD

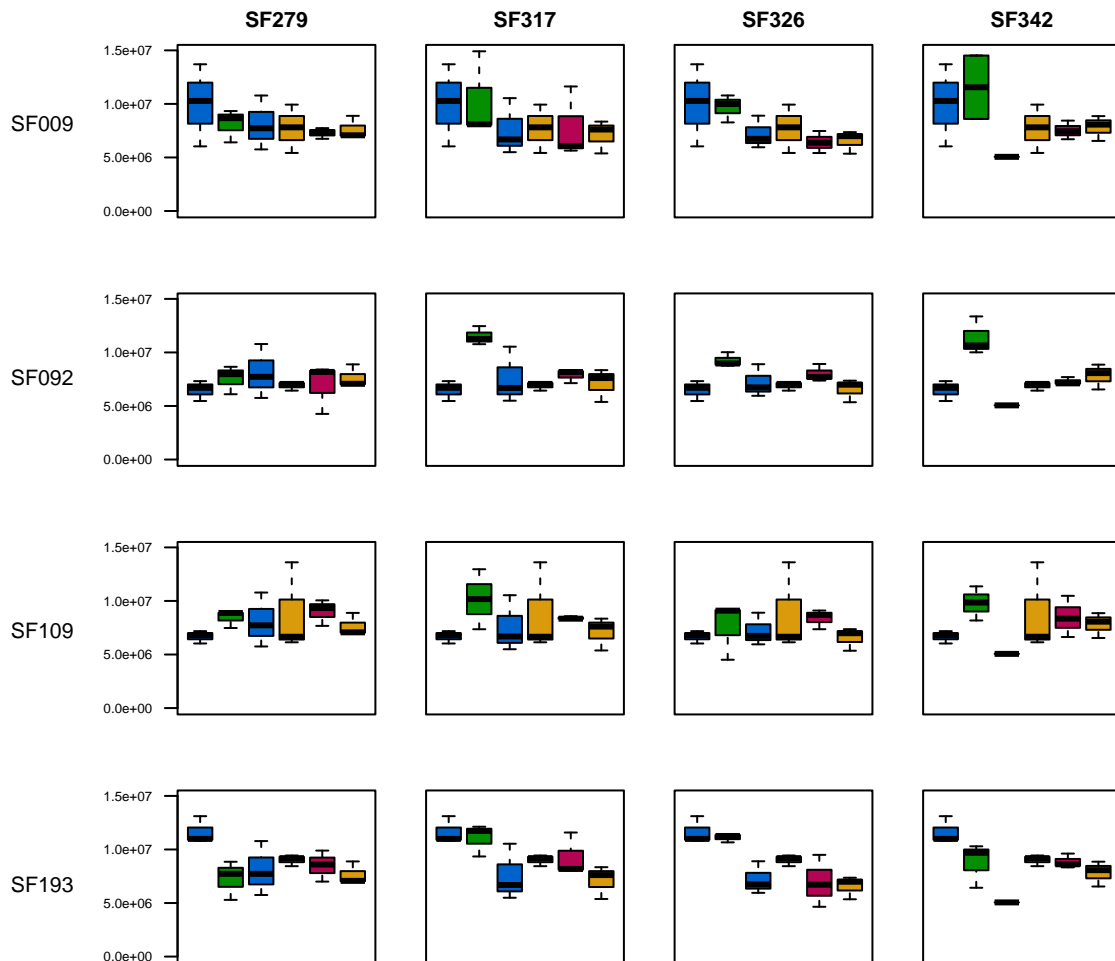

HanXRQChr05g0129231  
Probable thioredoxin superfamily protein

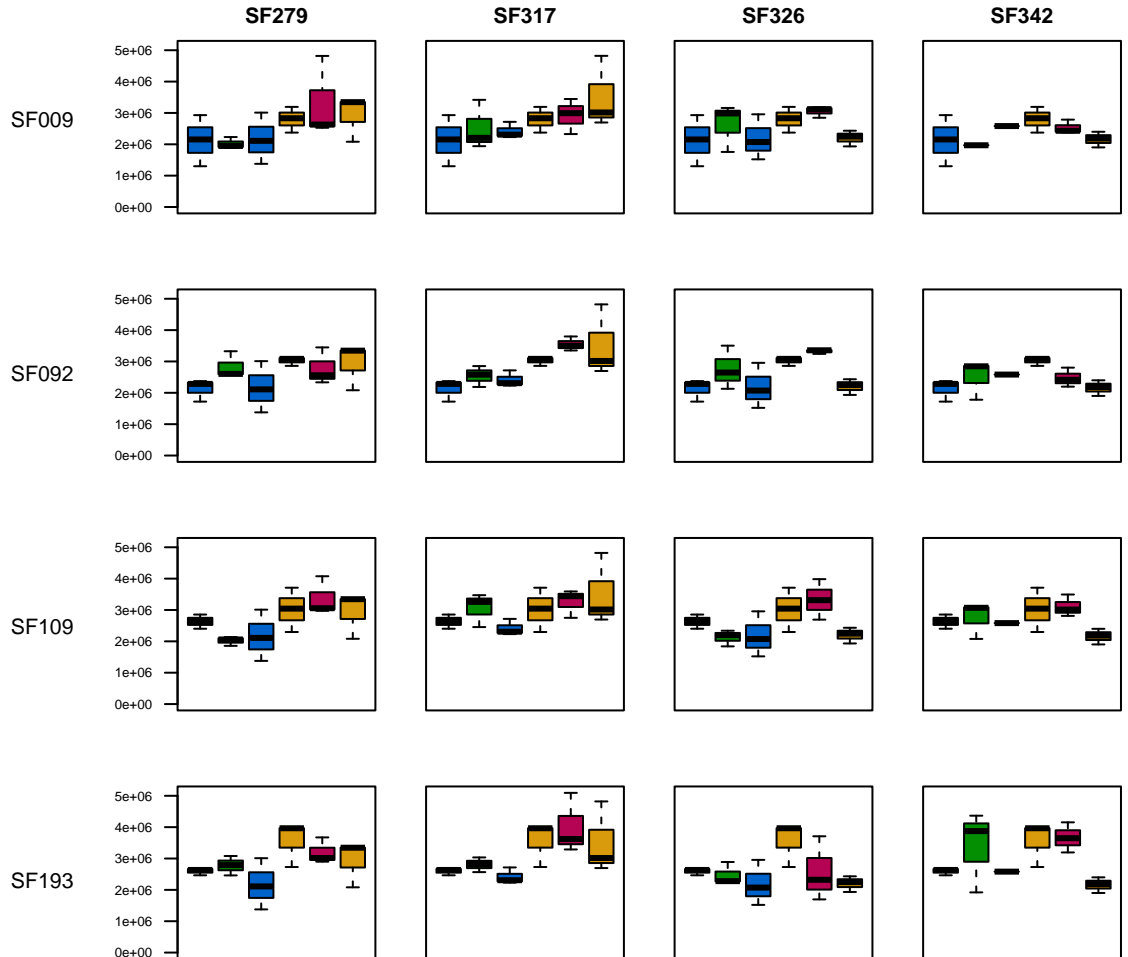

HanXRQChr03g0076861  
 Putative trigger factor,  
 ribosome-binding, bacterial; Trigger factor/

■ Parents WW  
 ■ Parents WD  
 ■ Hybrids WW  
 ■ Hybrids WD

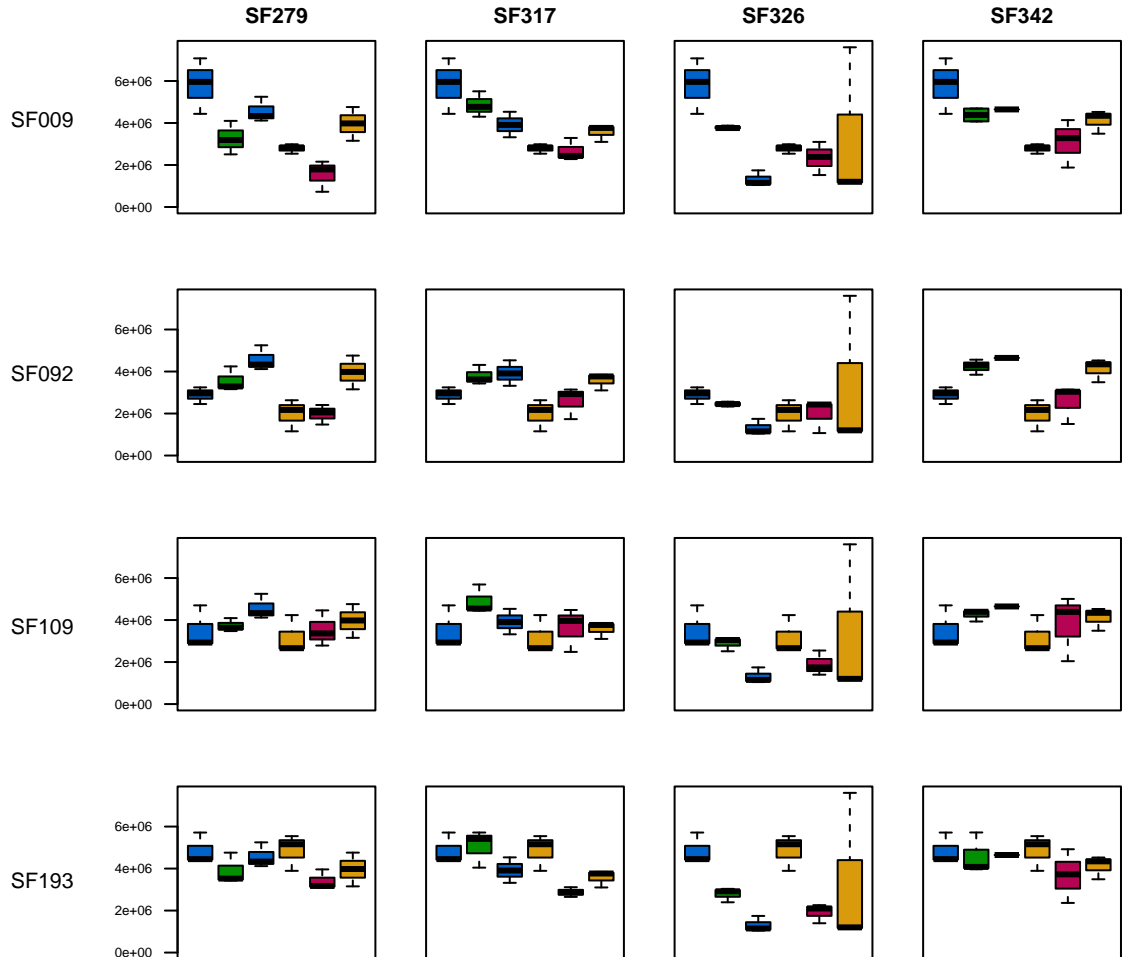

HanXRQChr01g0028661  
Probable alpha-crystallin domain 32.1

Parents WW  
Parents WD  
Hybrids WW  
Hybrids WD

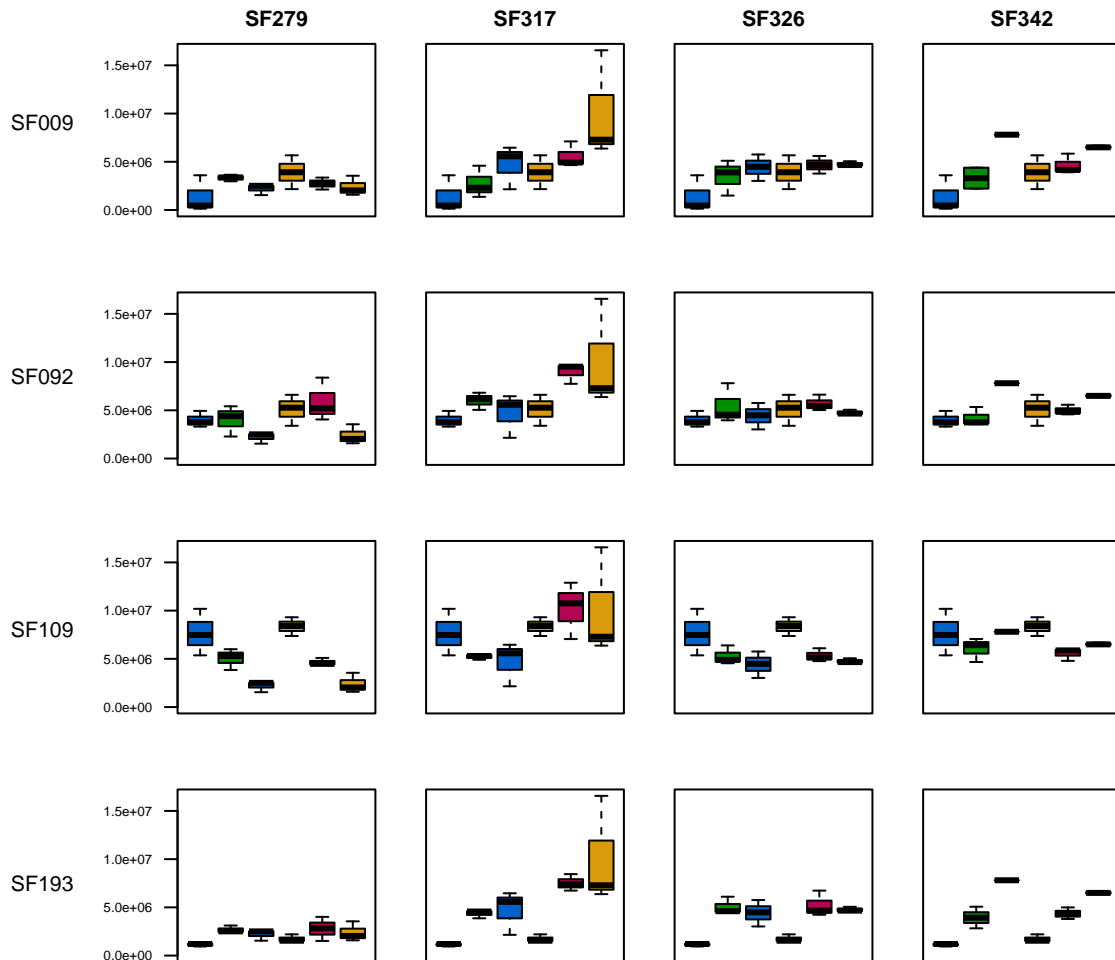

HanXRQChr14g0436381  
 Probable serine  
 hydroxymethyltransferase 4

Parents WW  
 Parents WD  
 Hybrids WW  
 Hybrids WD

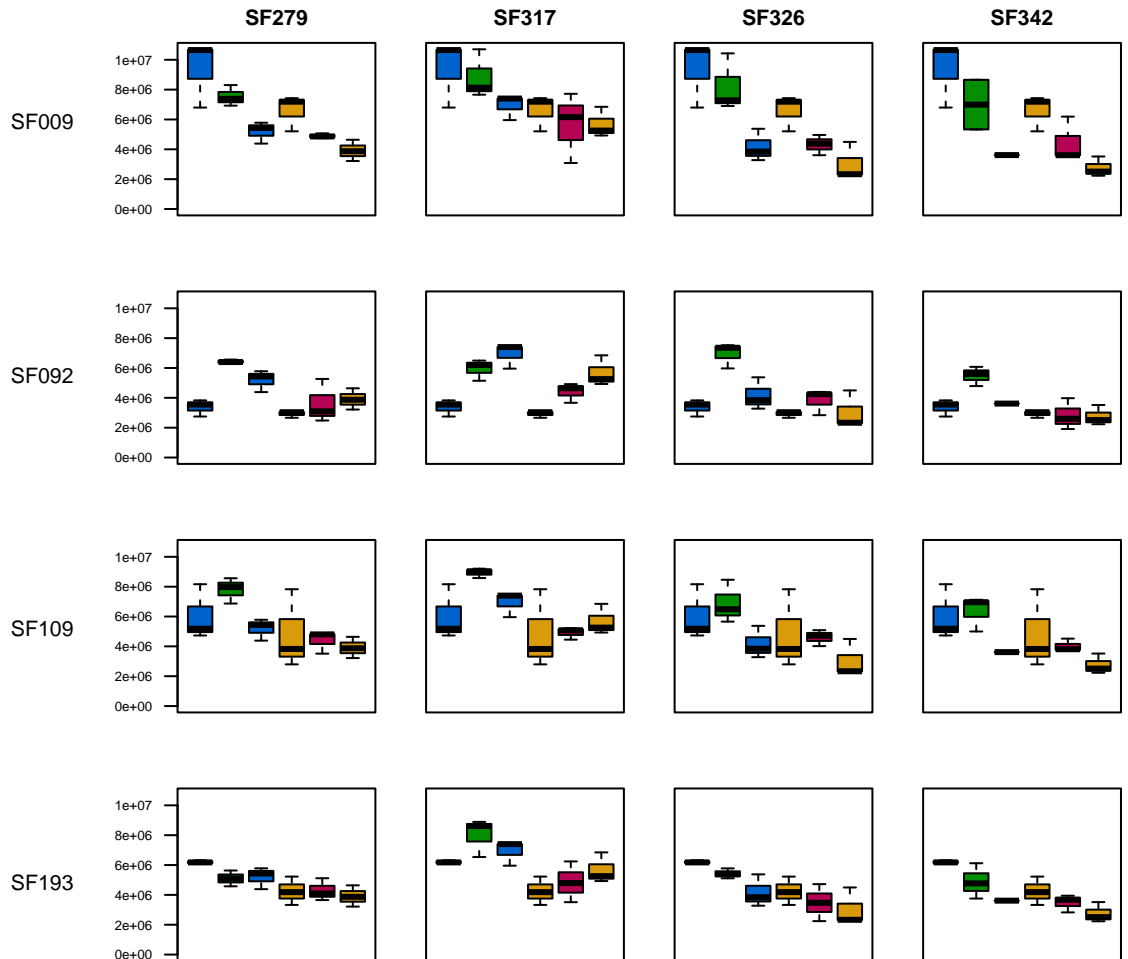

HanXRQChr07g0201601  
 Probable ribulose biphosphate  
 carboxylase/oxygenase activase, chloroplast

Parents WW  
 Parents WD  
 Hybrids WW  
 Hybrids WD

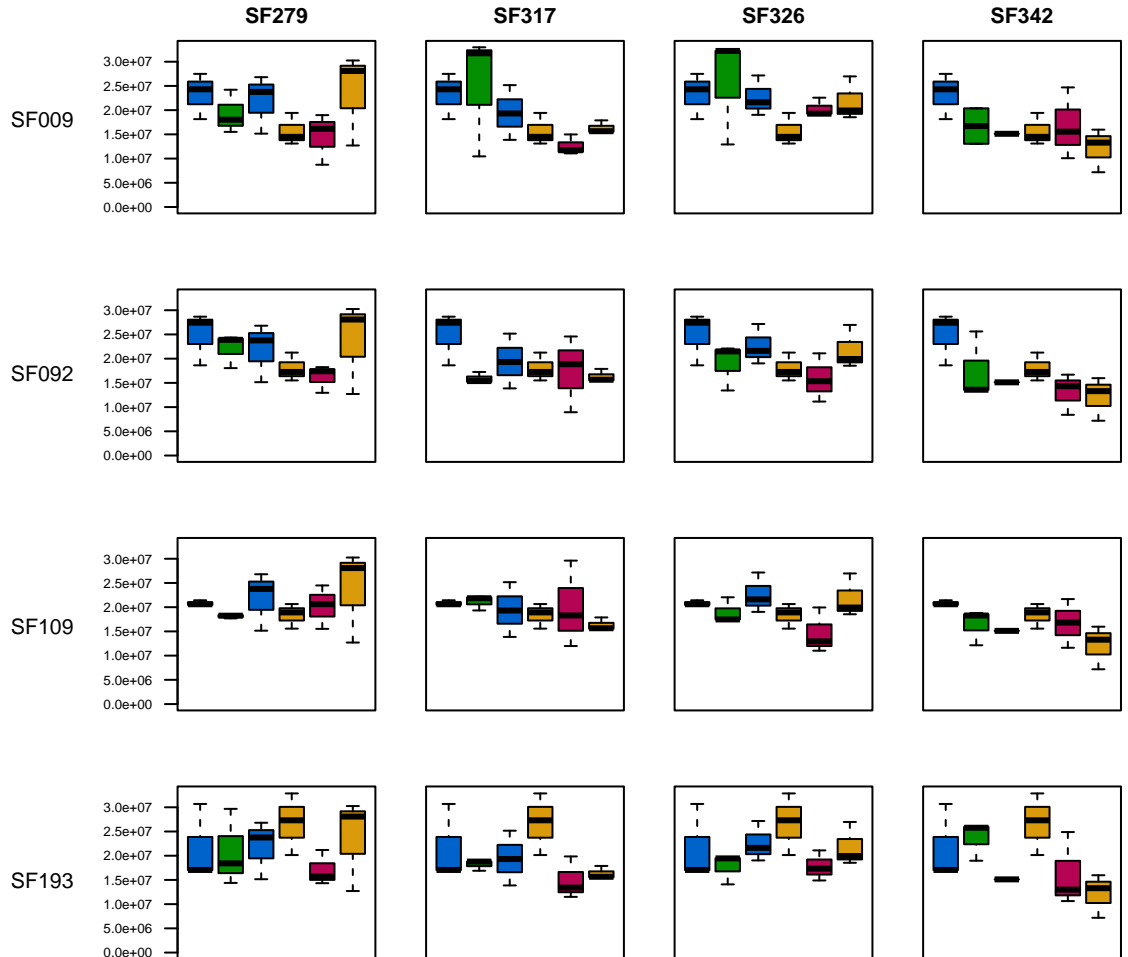

HanXRQChr03g0082041  
 Putative phosphoribulokinase; P-loop  
 containing nucleoside triphosphate hydrolase

Parents WW  
 Parents WD  
 Hybrids WW  
 Hybrids WD

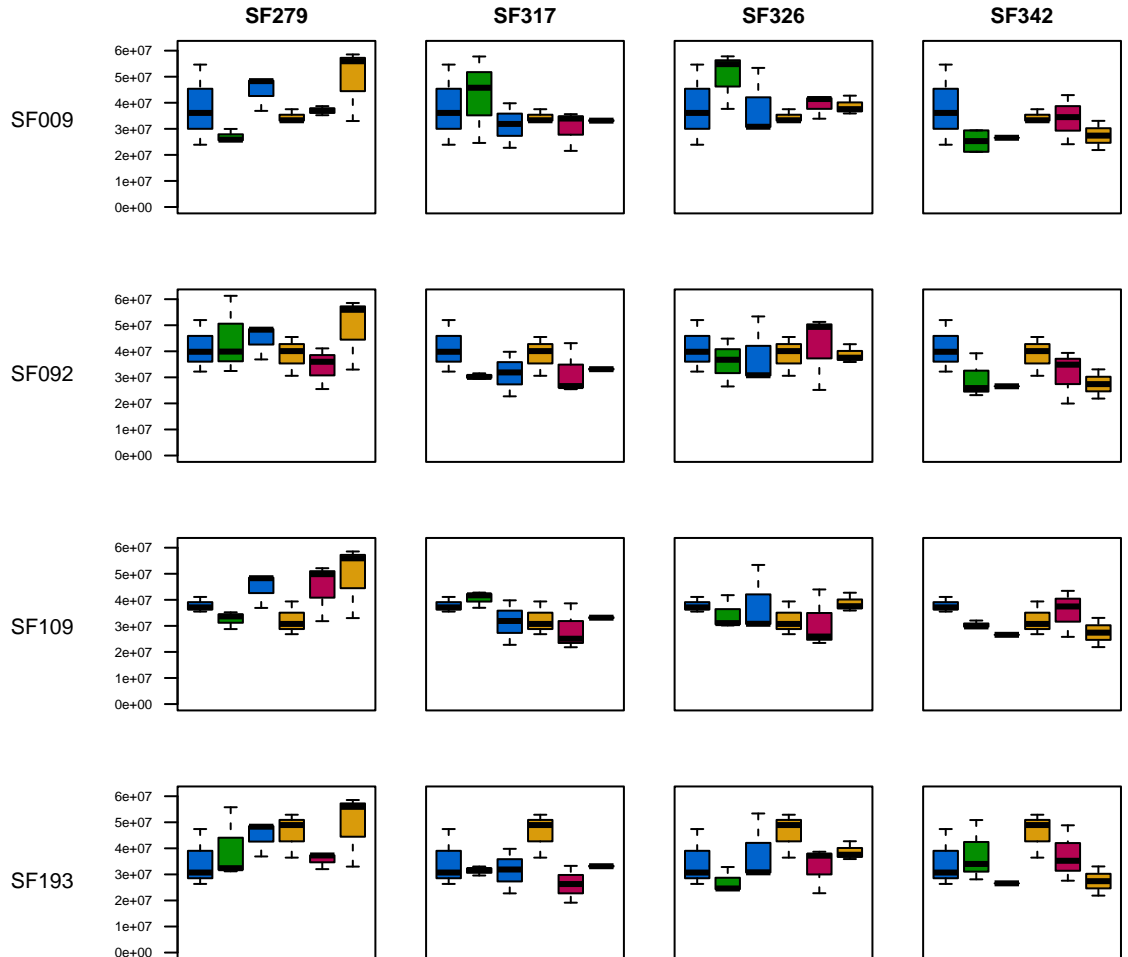



HanXRQChr06g0170341  
Probable methylenetetrahydrofolate  
reductase 2

Parents WW  
Parents WD  
Hybrids WW  
Hybrids WD

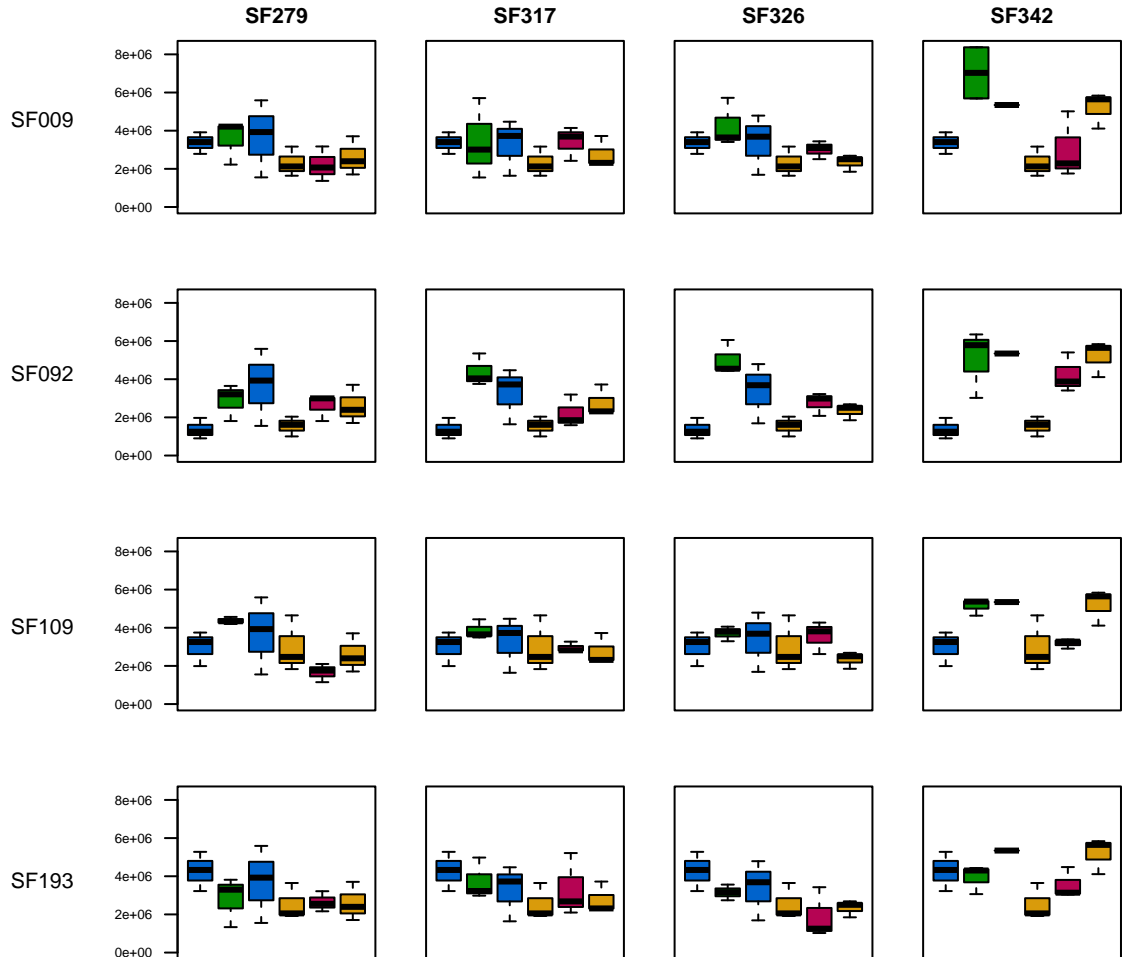

HanXRQChr14g0445181  
Probable malate dehydrogenase,  
glyoxysomal

Parents WW  
Parents WD  
Hybrids WW  
Hybrids WD

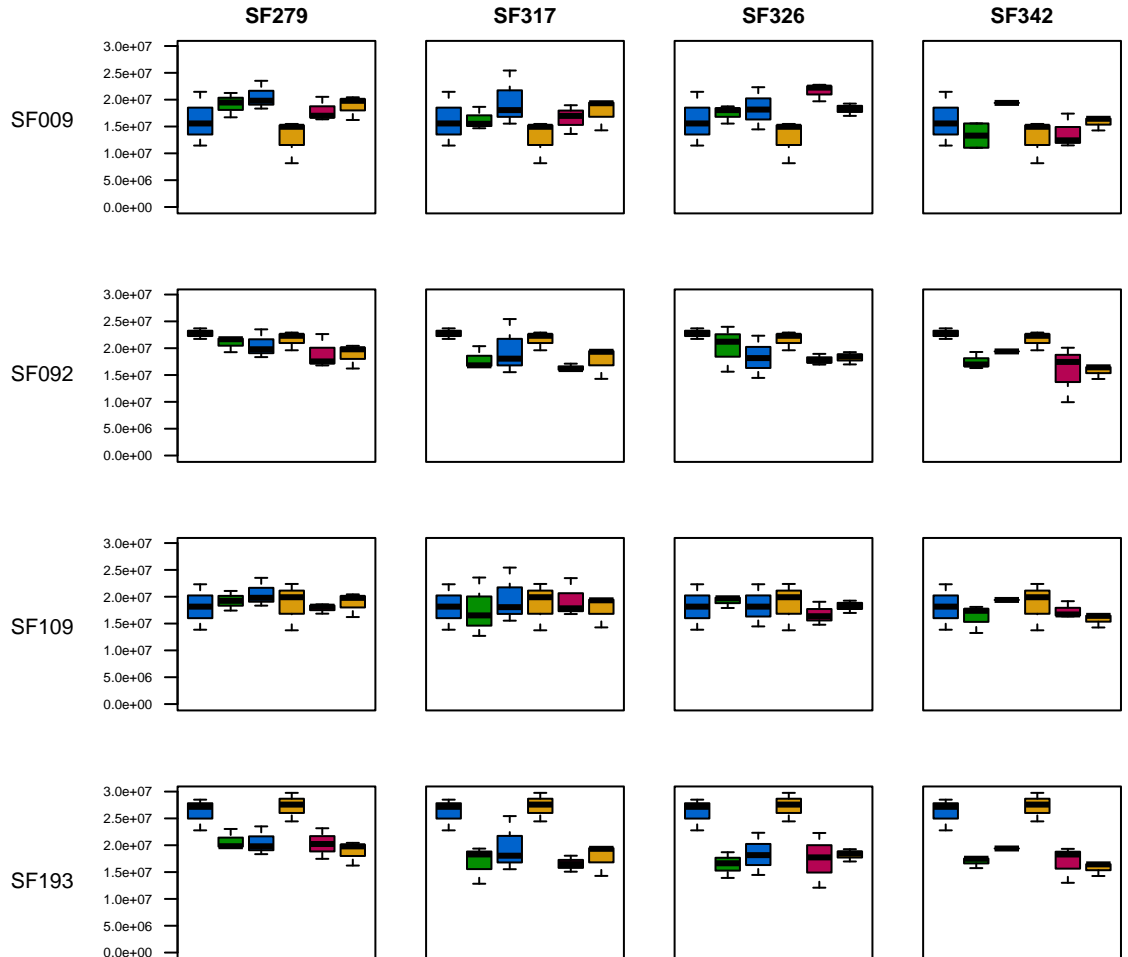

HanXRQChr17g0567431  
 Probable phosphoglucomutase, putative /  
 glucose phosphomutase, putative

Parents WW  
 Parents WD  
 Hybrids WW  
 Hybrids WD

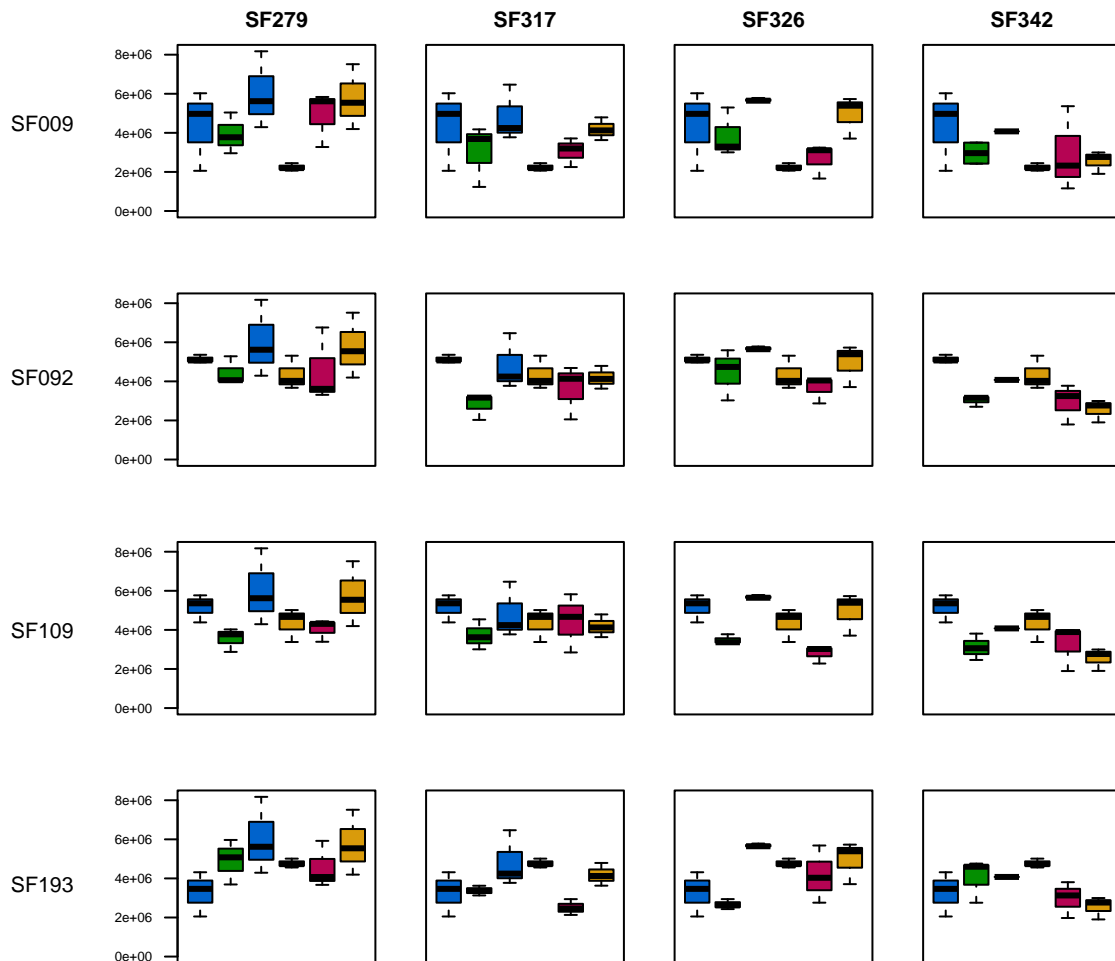

HanXRQChr17g0534251  
Putative alpha/Beta hydrolase fold

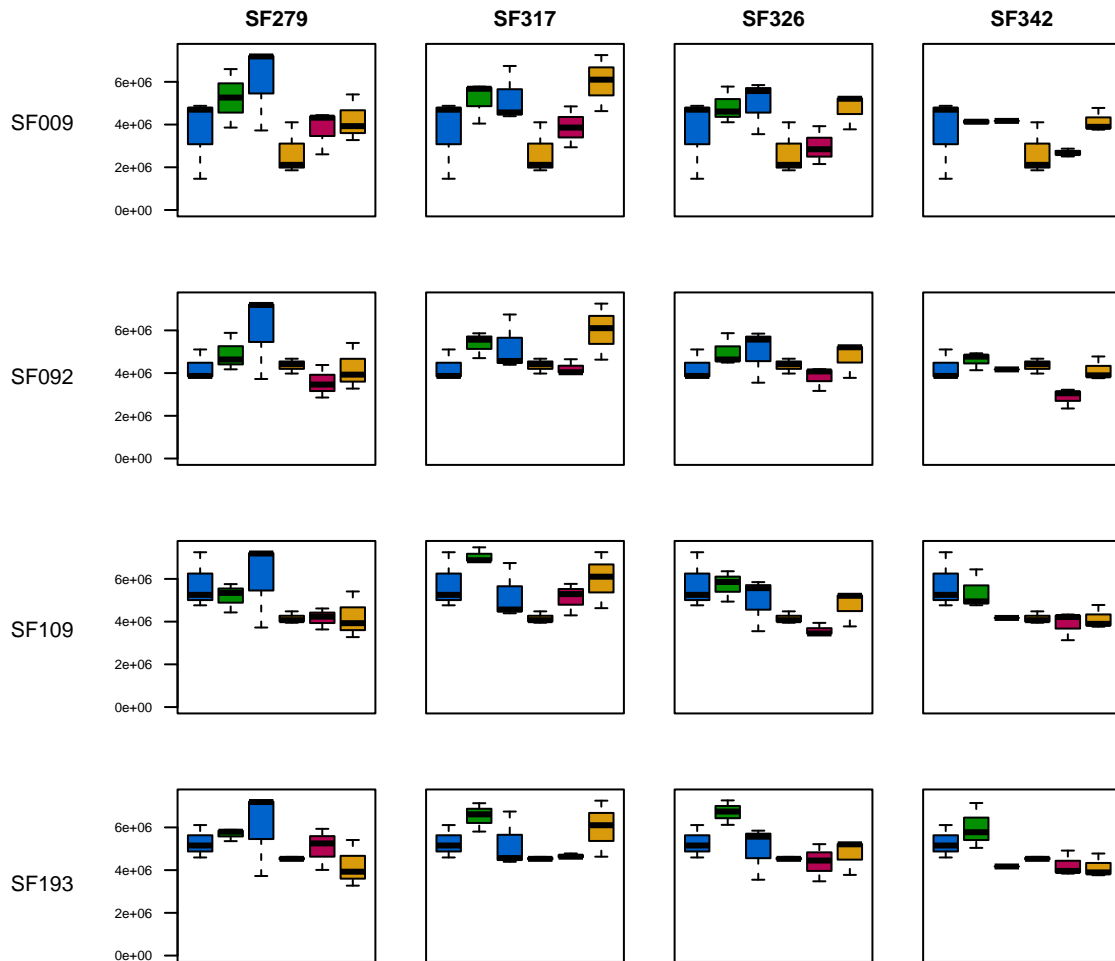

HanXRQChr07g0206311  
Probable 2 iron, 2 sulfur cluster  
binding

Parents WW  
Parents WD  
Hybrids WW  
Hybrids WD

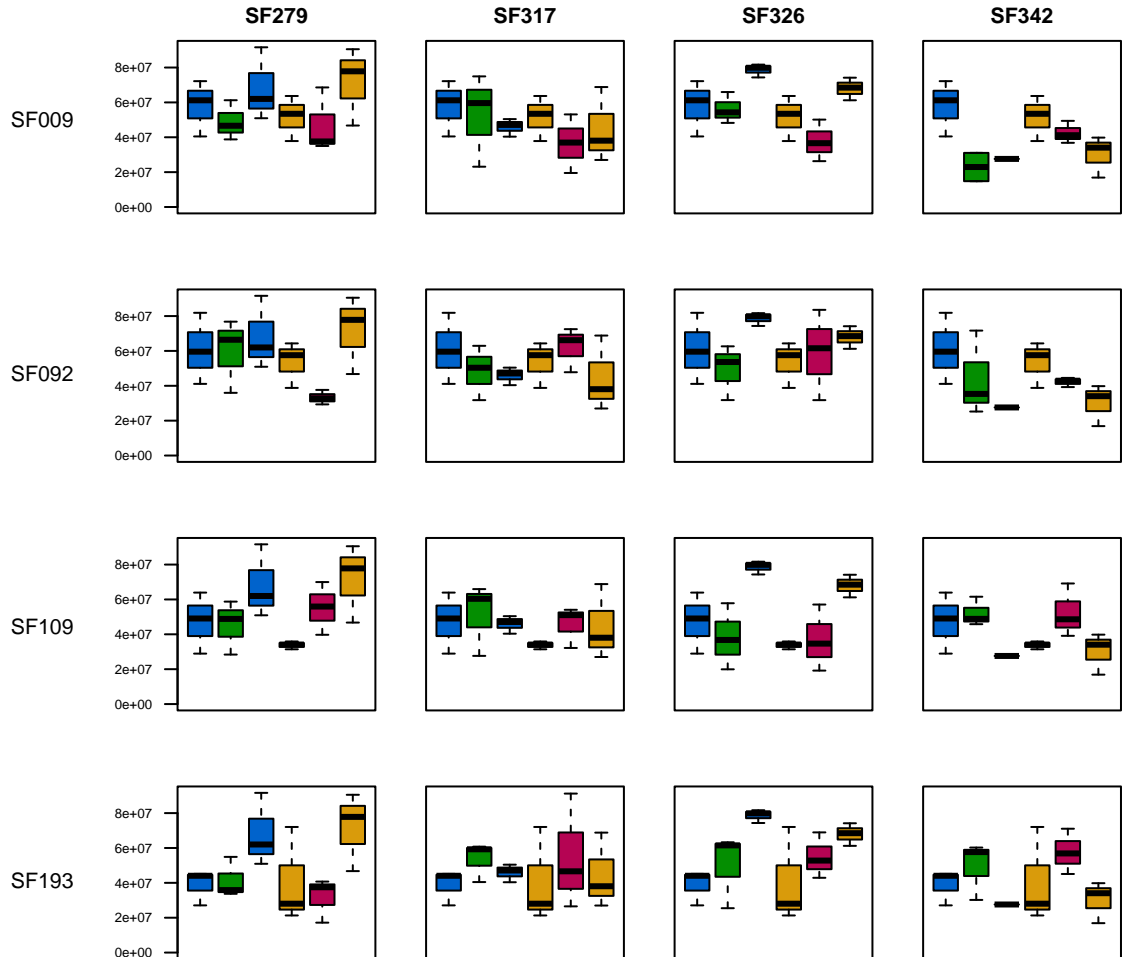

HanXRQChr13g0395131  
Probable RNA-binding (RRM/RBD/RNP  
motifs) family protein

Parents WW  
Parents WD  
Hybrids WW  
Hybrids WD

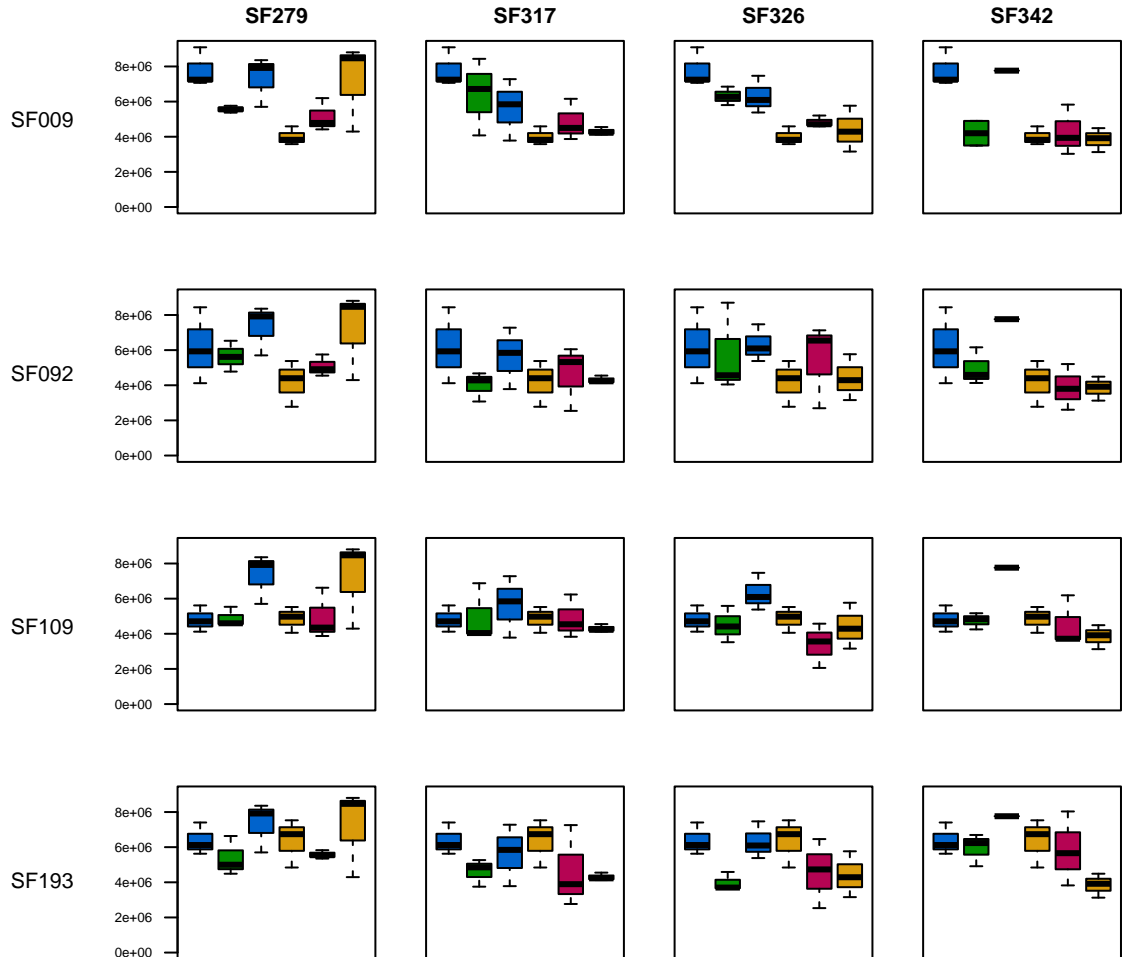

HanXRQChr13g0397641  
Putative ricin B, lectin domain

Parents WW  
Parents WD  
Hybrids WW  
Hybrids WD

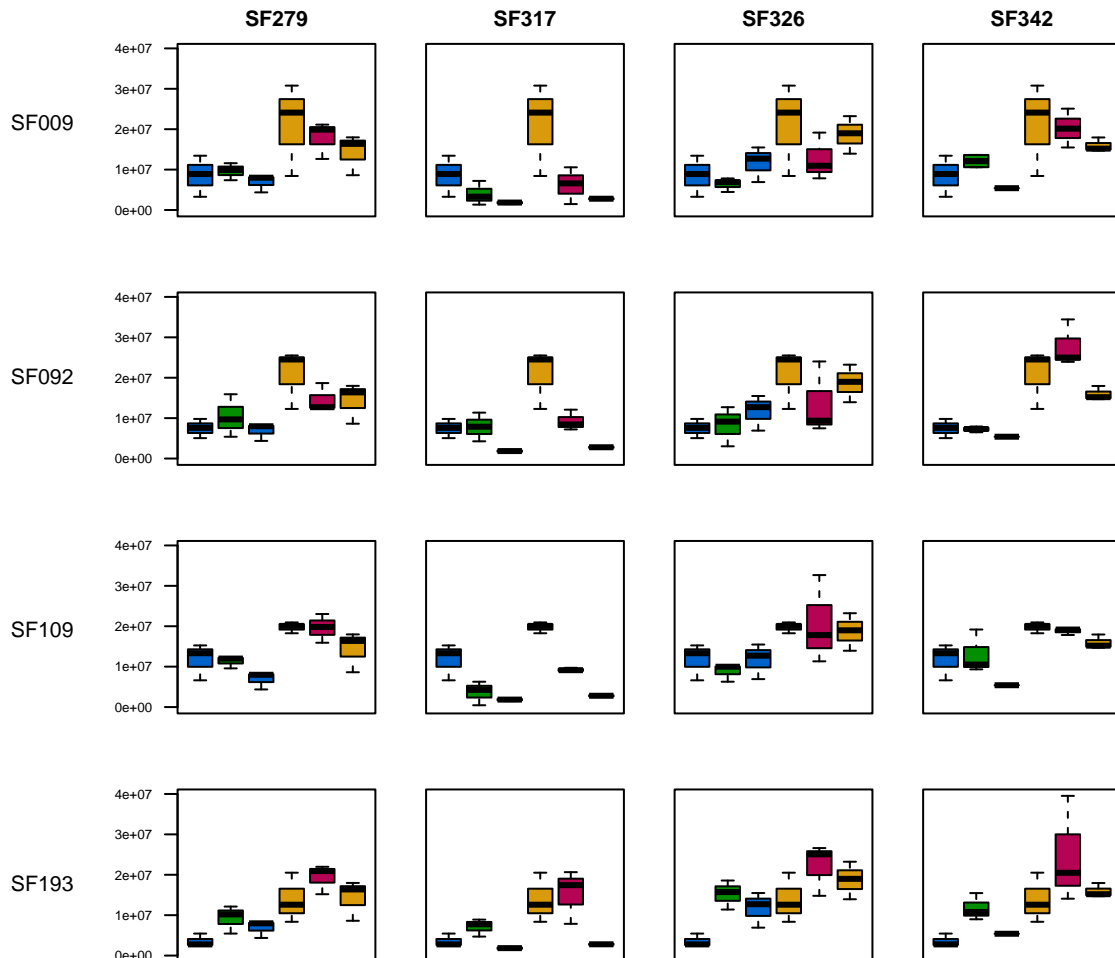

HanXRQChr12g0356761  
Putative DNA-binding domain

Parents WW  
Parents WD  
Hybrids WW  
Hybrids WD

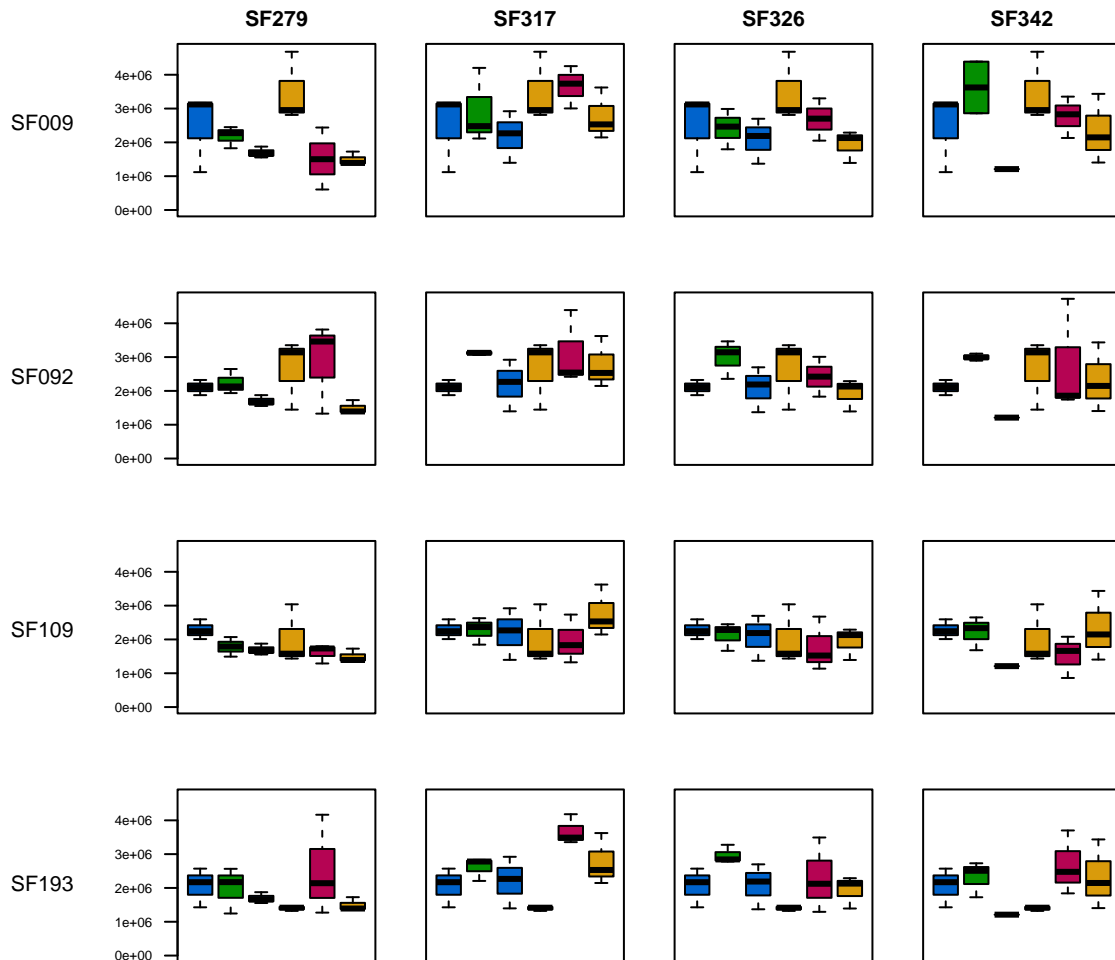



HanXRQChr03g0065761  
 Probable RNA-binding (RRM/RBD/RNP  
 motifs) family protein with retrovirus zinc fin

Parents WW  
 Parents WD  
 Hybrids WW  
 Hybrids WD

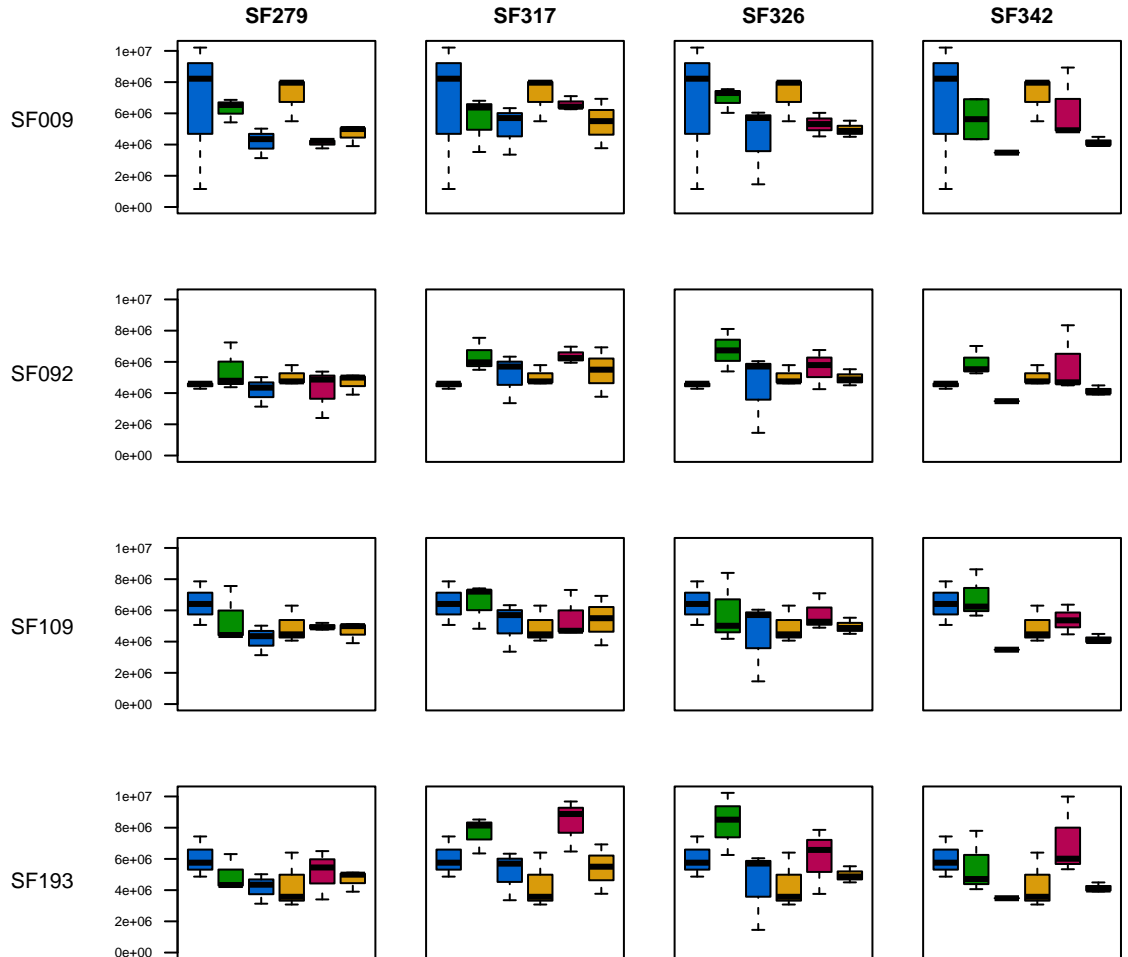

HanXRQChr14g0439791  
Probable phosphoglucomutase,  
chloroplastic

Parents WW  
Parents WD  
Hybrids WW  
Hybrids WD

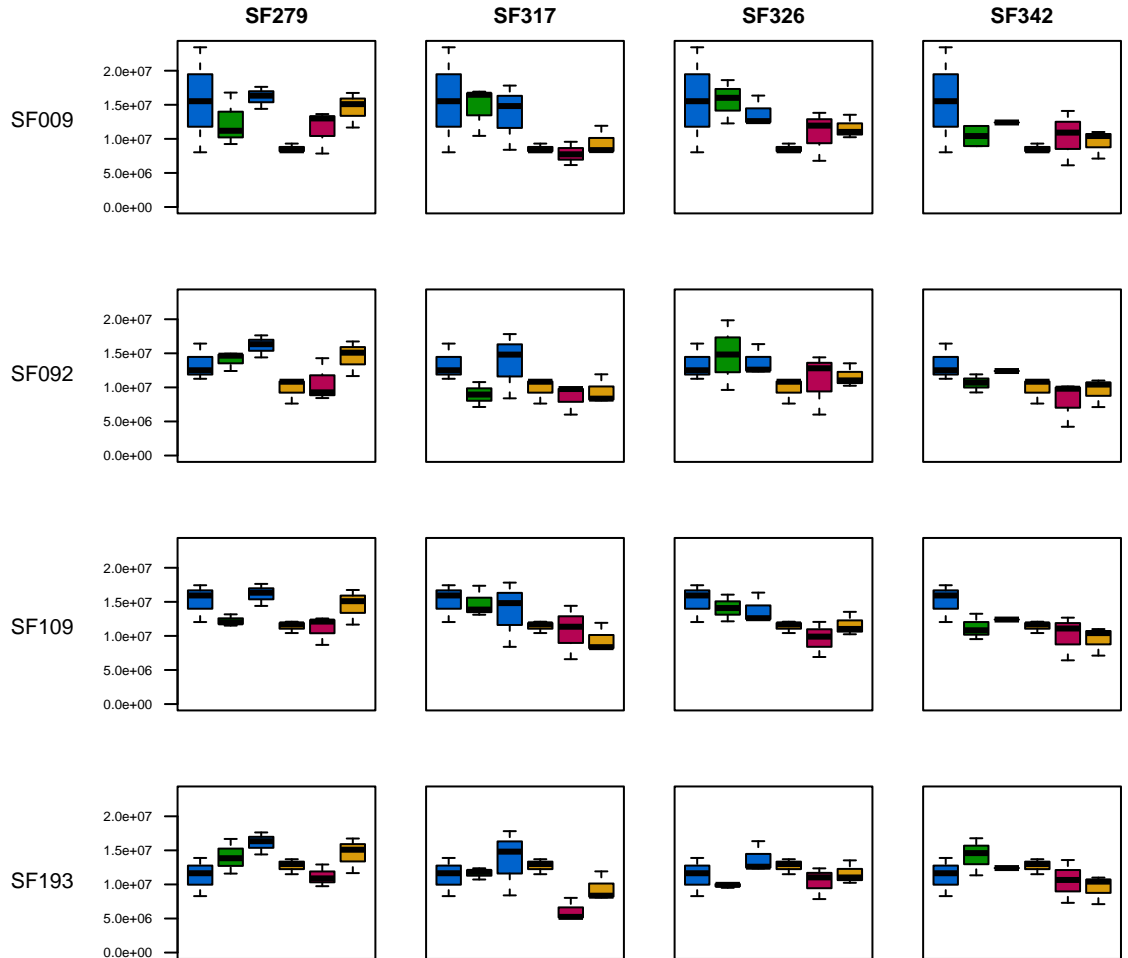

HanXRQChr10g0311781  
 Putative pectinesterase, catalytic;  
 Pectinesterase inhibitor domain; Pectin lyas

■ Parents WW  
 ■ Parents WD  
 ■ Hybrids WW  
 ■ Hybrids WD

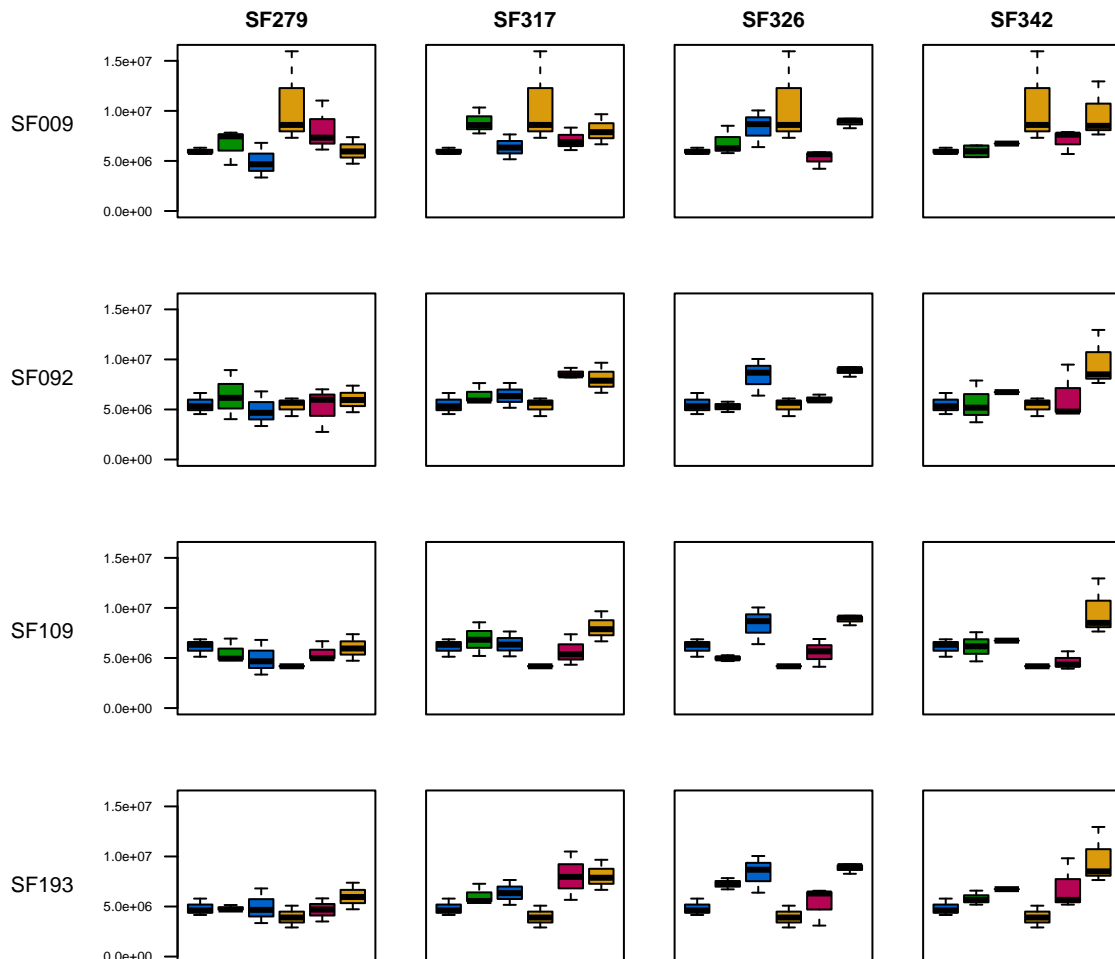

HanXRQChr17g0548861  
Probable class I glutamine  
amidotransferase-like superfamily protein

Parents WW  
Parents WD  
Hybrids WW  
Hybrids WD

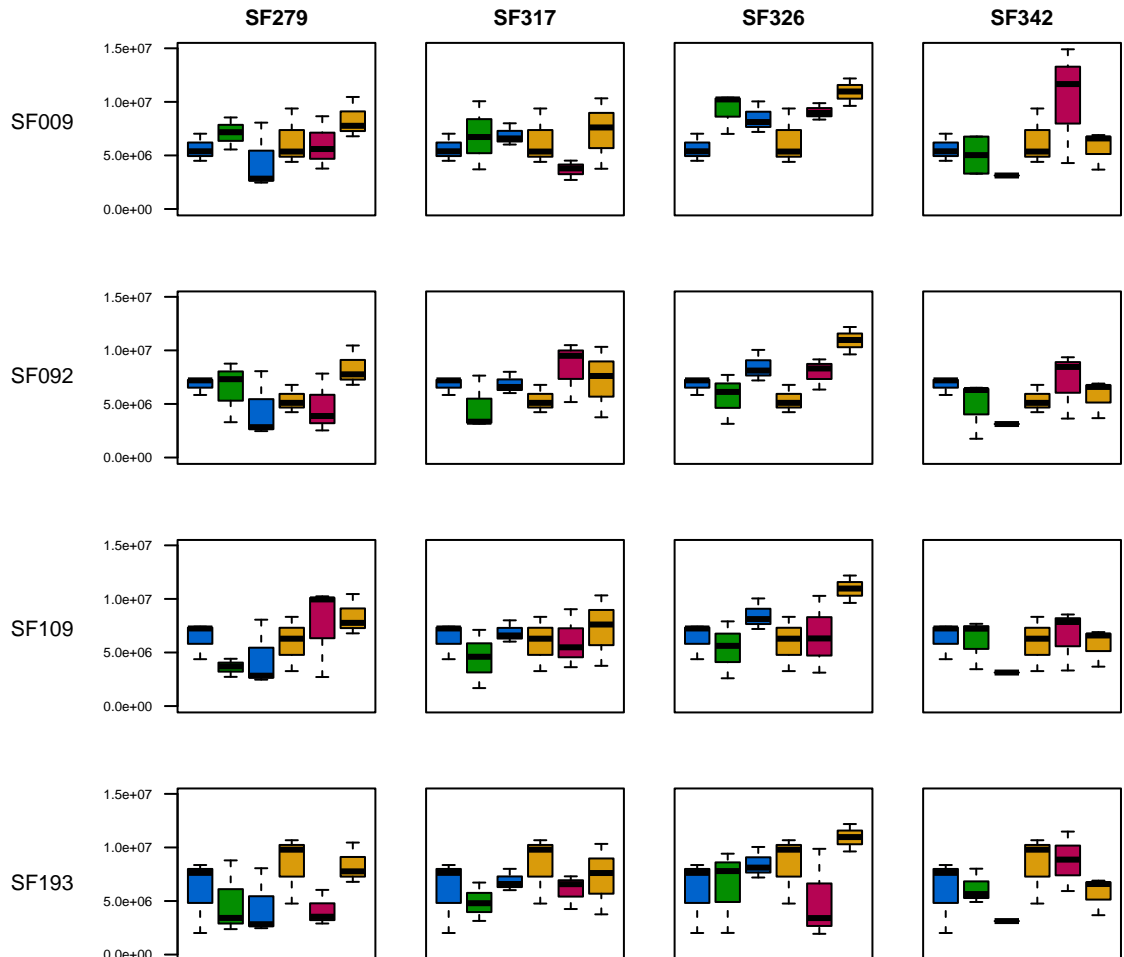

HanXRQChr11g0335541  
Probable proteasome subunit alpha type-2

Parents WW  
Parents WD  
Hybrids WW  
Hybrids WD

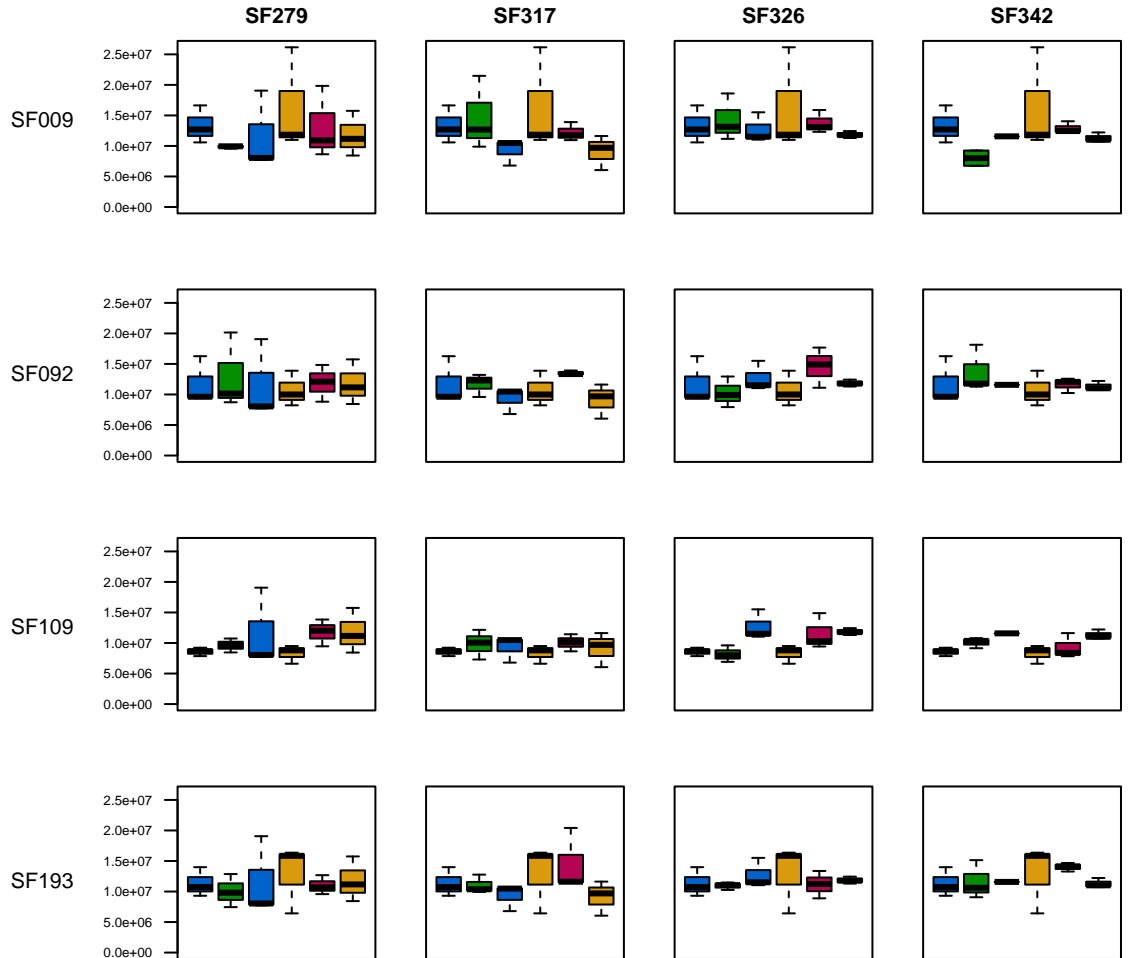

HanXRQChr17g0534241  
Probable methionine gamma-lyase

- Parents WW
- Parents WD
- Hybrids WW
- Hybrids WD

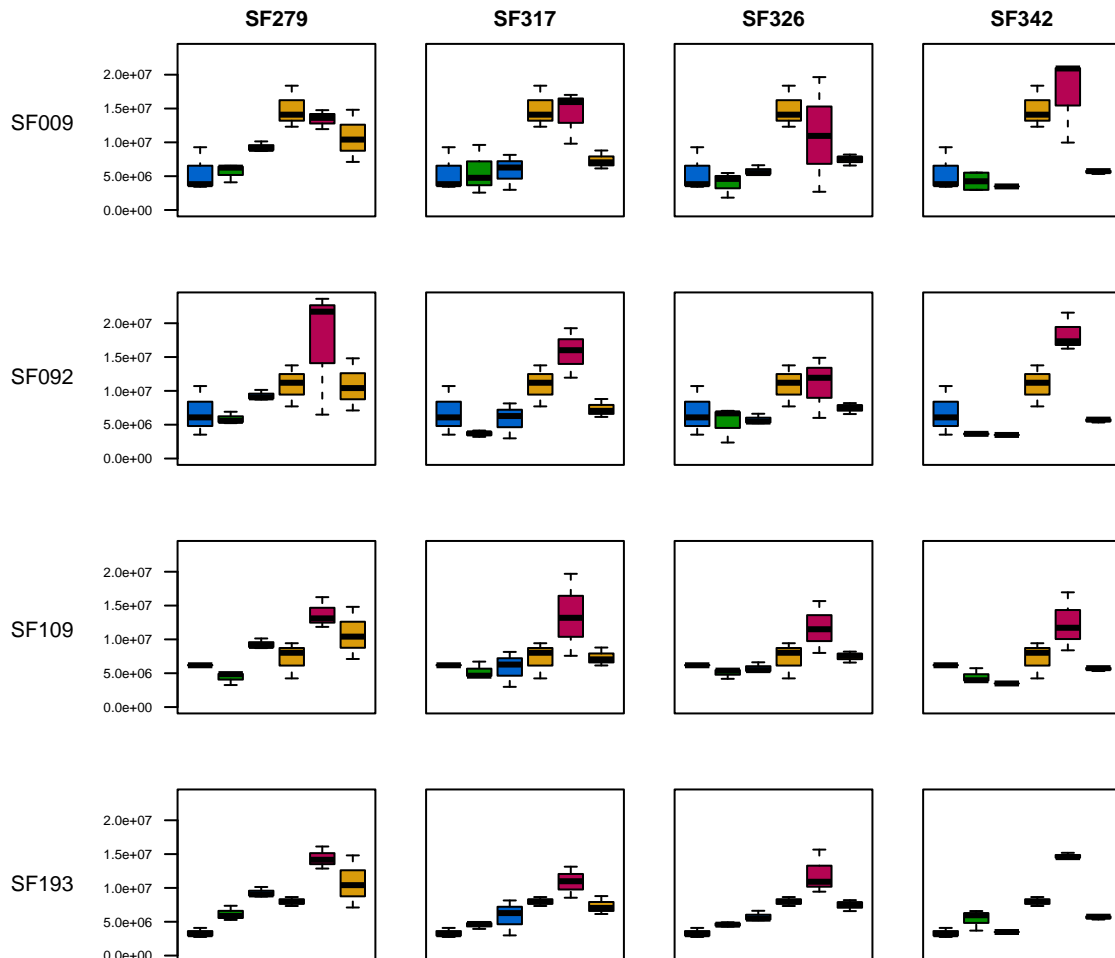

HanXRQChr03g0062201

Putative histone H2A; Histone-fold;

Histone H2A, C-terminal domain; Histone H

Parents WW  
Parents WD  
Hybrids WW  
Hybrids WD

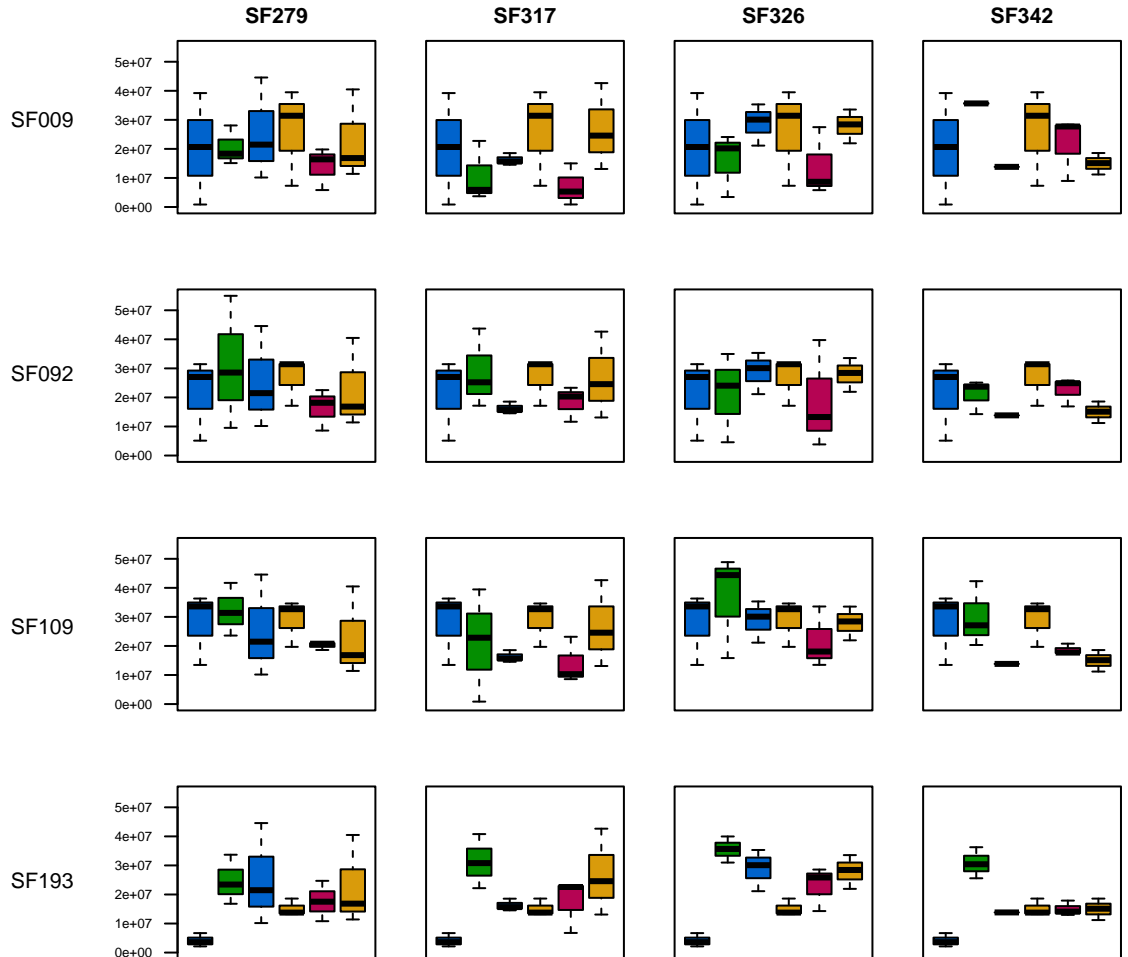

HanXRQChr13g0400121  
 Probable 29 kDa ribonucleoprotein A,  
 chloroplastic

Parents WW  
 Parents WD  
 Hybrids WW  
 Hybrids WD

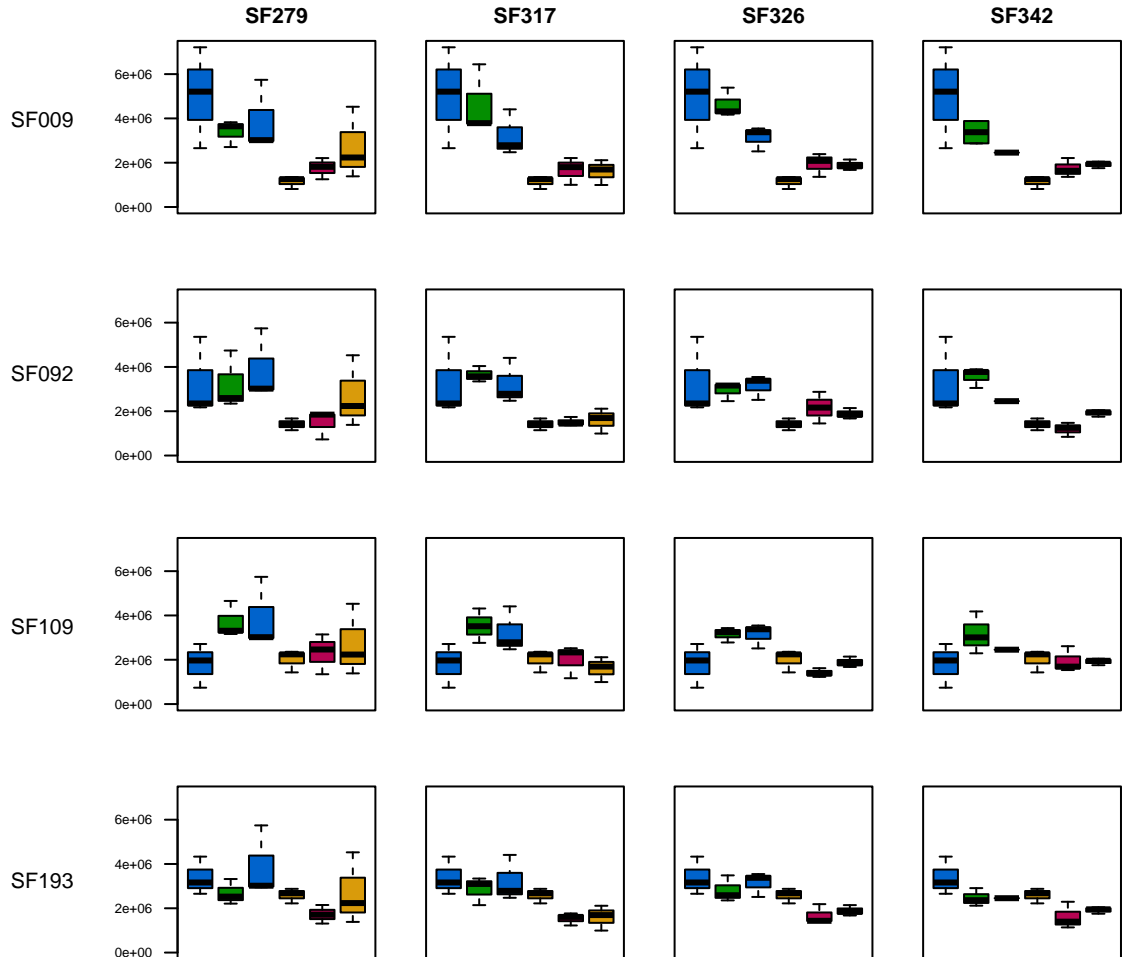



HanXRQChr06g0181591  
Probable enolase 1

Parents WW  
Parents WD  
Hybrids WW  
Hybrids WD

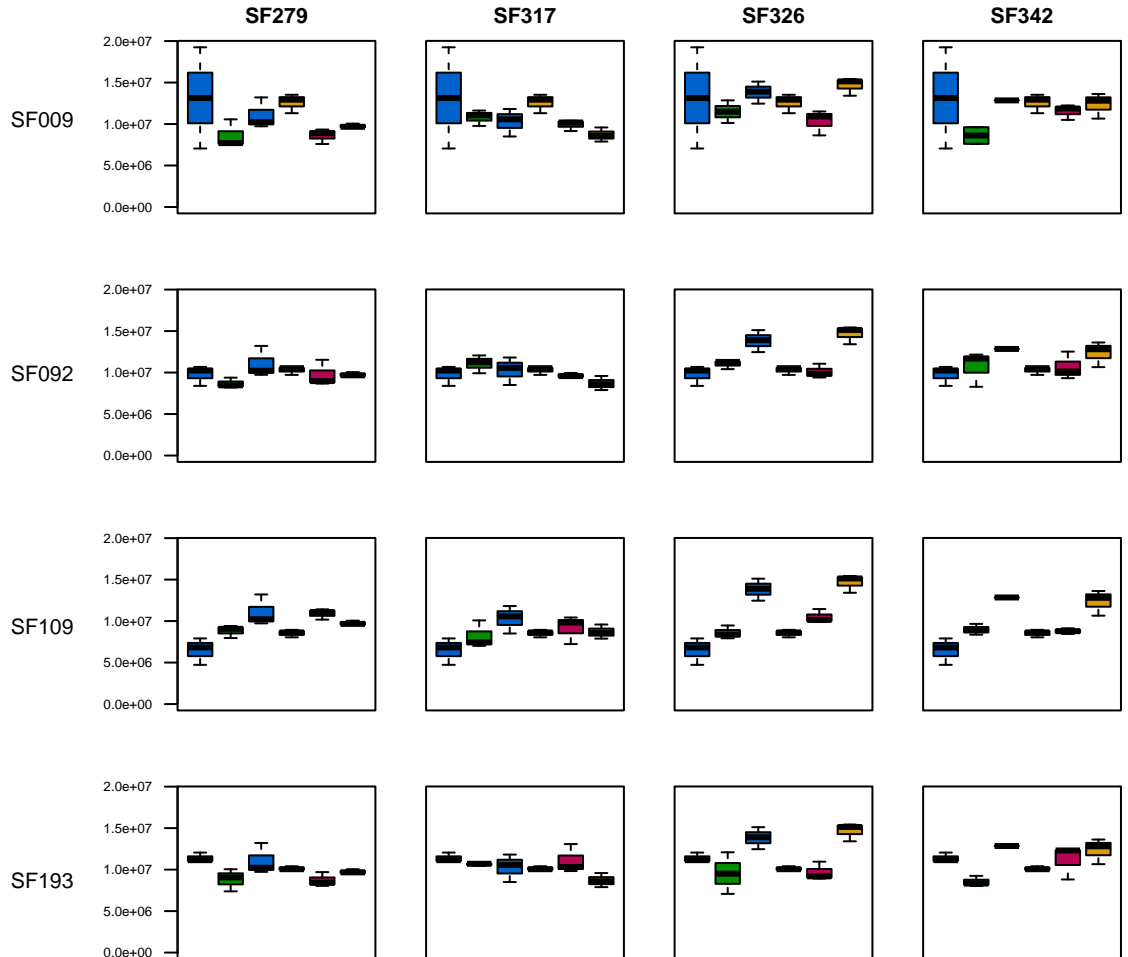

HanXRQChr01g0029821  
Putative nucleoside phosphorylase

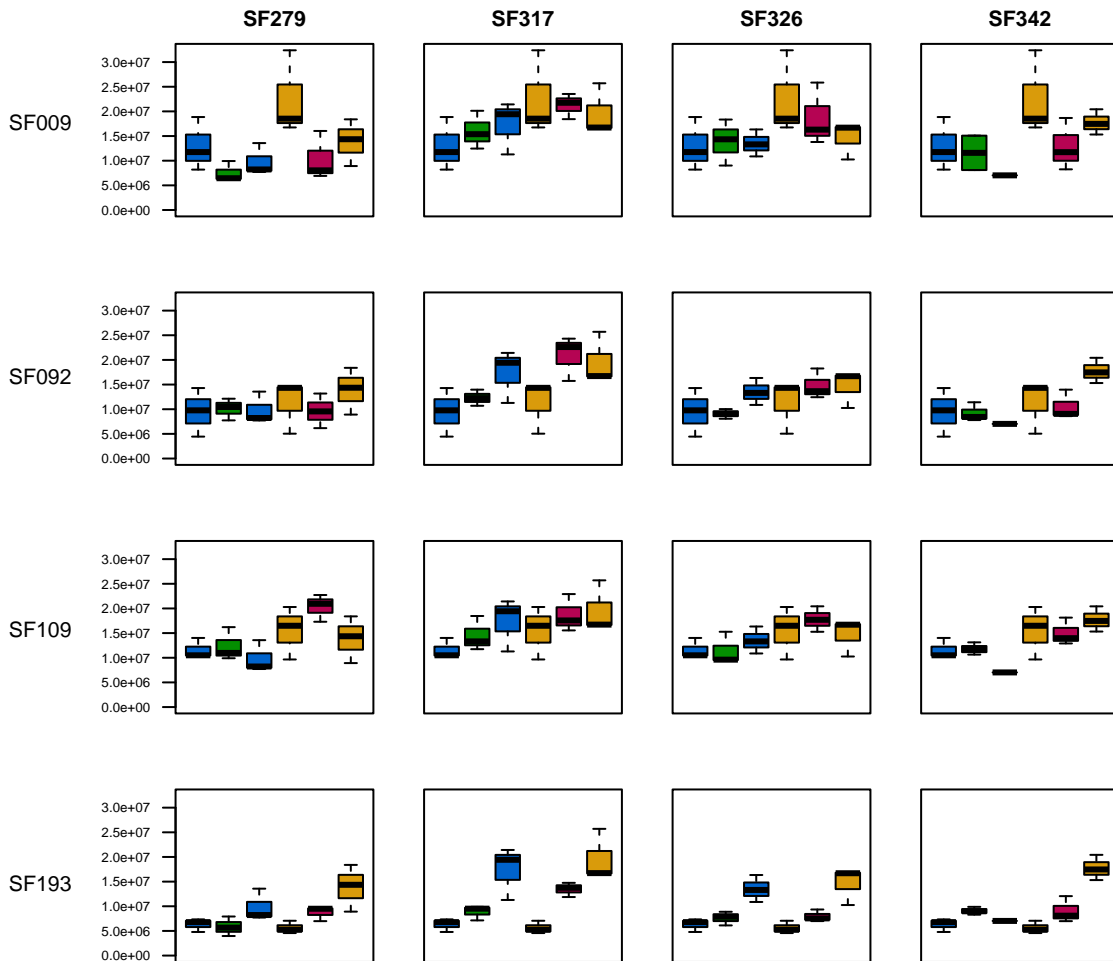

HanXRQChr01g0028581  
Putative acetyl-CoA carboxylase, biotin  
carboxylase; Glutathione synthetase, proka

Parents WW  
Parents WD  
Hybrids WW  
Hybrids WD

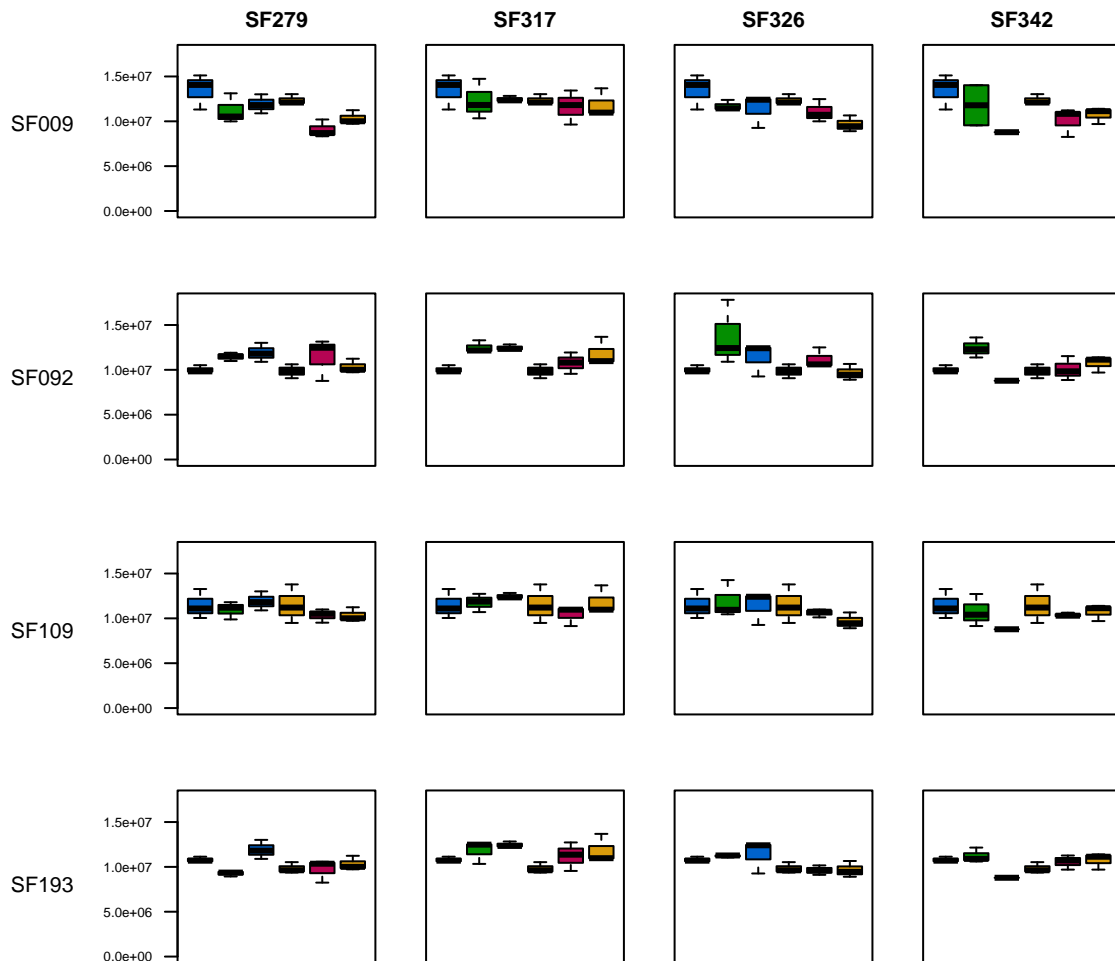

HanXRQChr10g0319101  
Probable metalloproteinase M24 family  
protein

Parents WW  
Parents WD  
Hybrids WW  
Hybrids WD

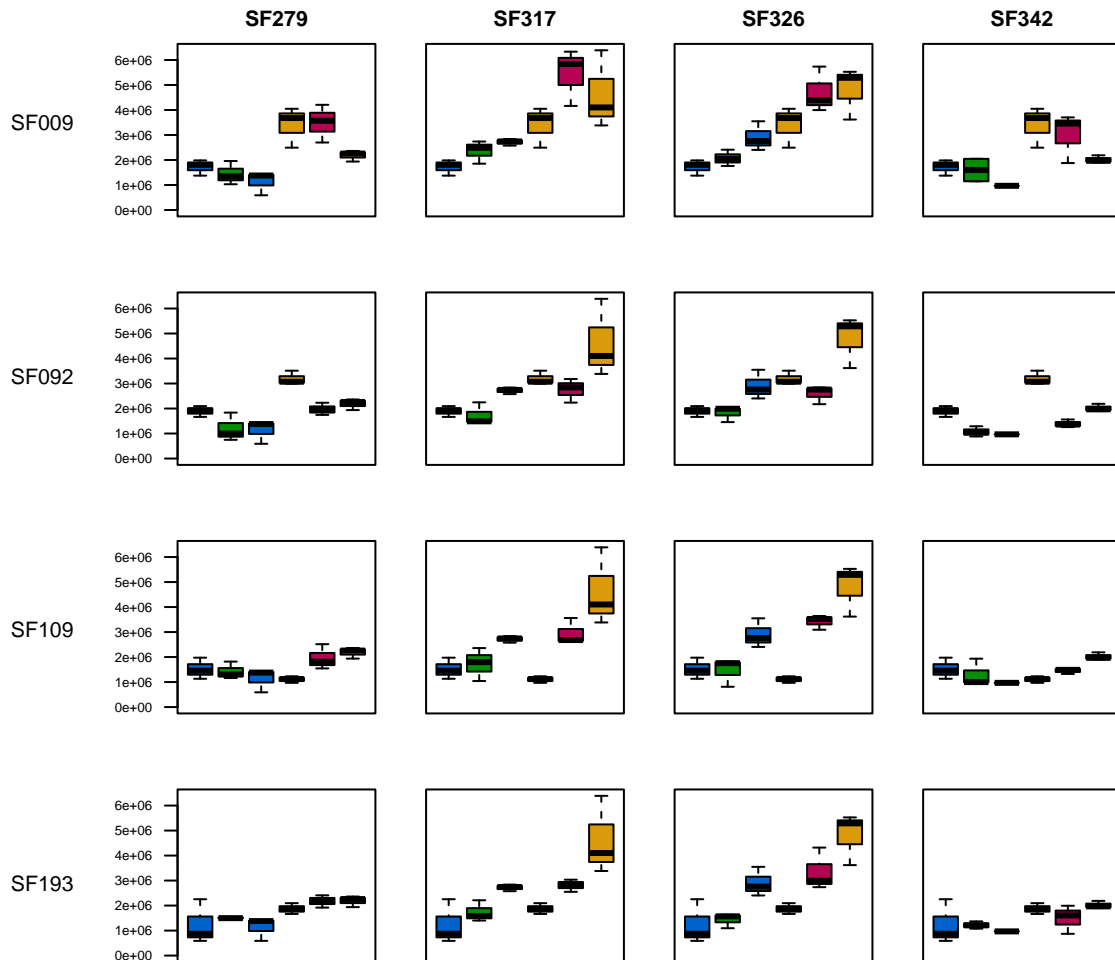

HanXRQChr01g0017741  
Probable chaperonin 20

Parents WW  
Parents WD  
Hybrids WW  
Hybrids WD

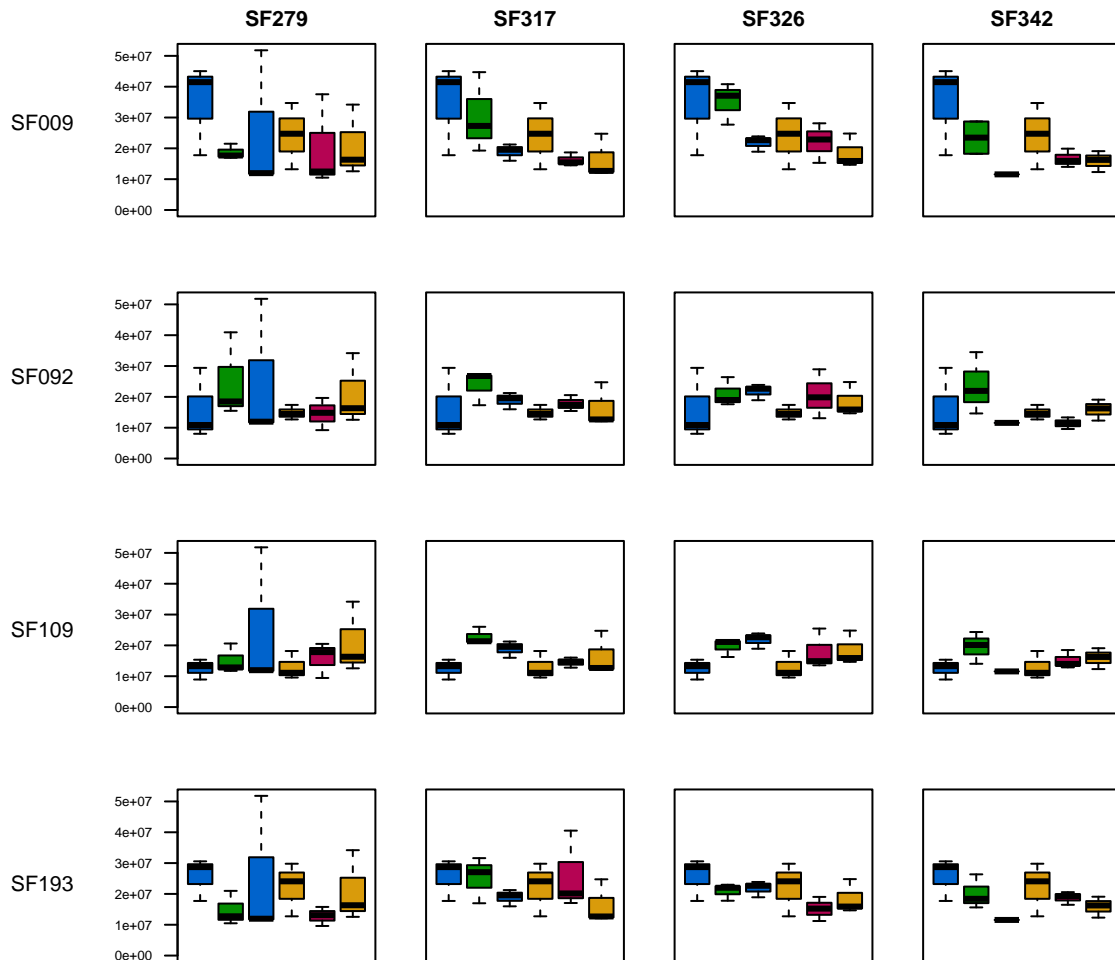

HanXRQChr09g0264041  
 Probable domain of unknown function  
 (DUF3598)

Parents WW  
 Parents WD  
 Hybrids WW  
 Hybrids WD

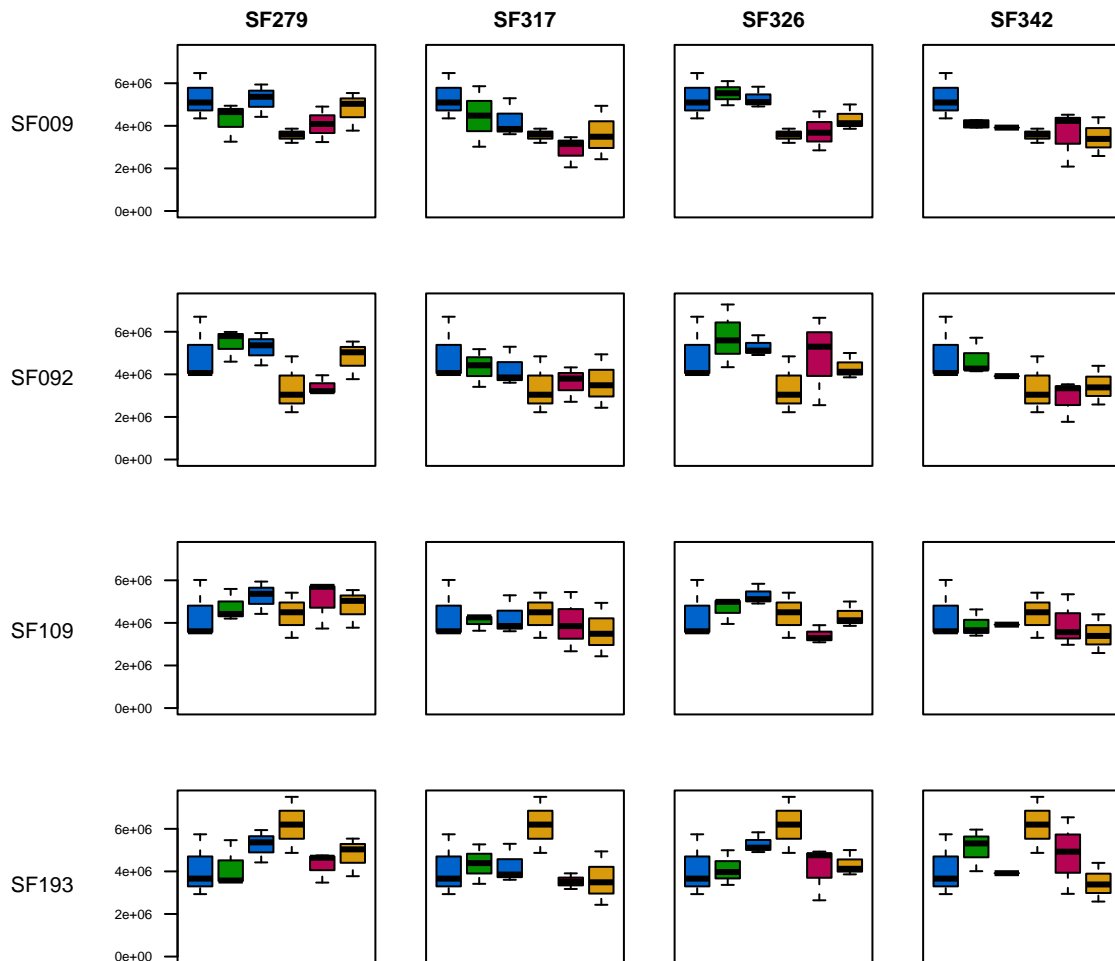

HanXRQChr05g0163671  
Probable serine  
hydroxymethyltransferase 2

Parents WW  
Parents WD  
Hybrids WW  
Hybrids WD

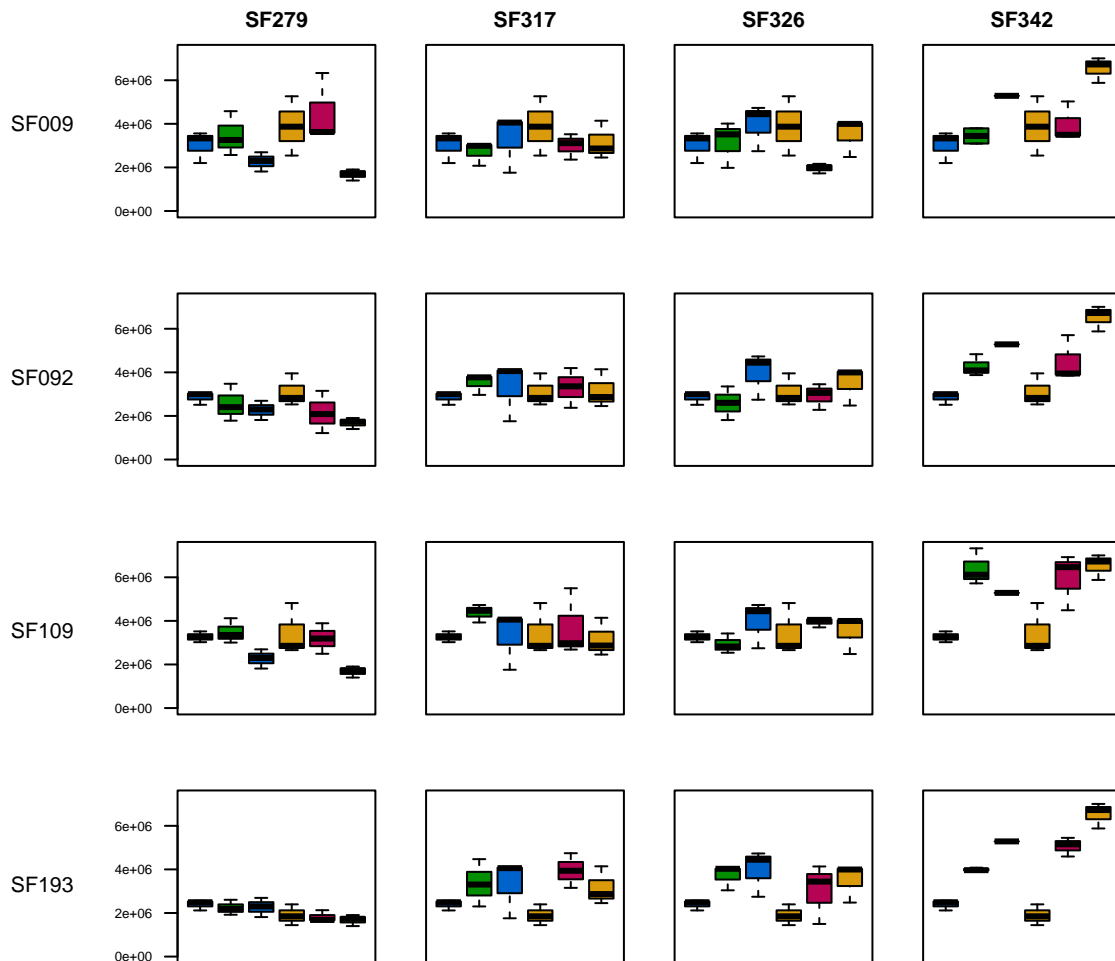

HanXRQChr01g0019231  
Probable alpha carbonic anhydrase 5

- Parents WW
- Parents WD
- Hybrids WW
- Hybrids WD

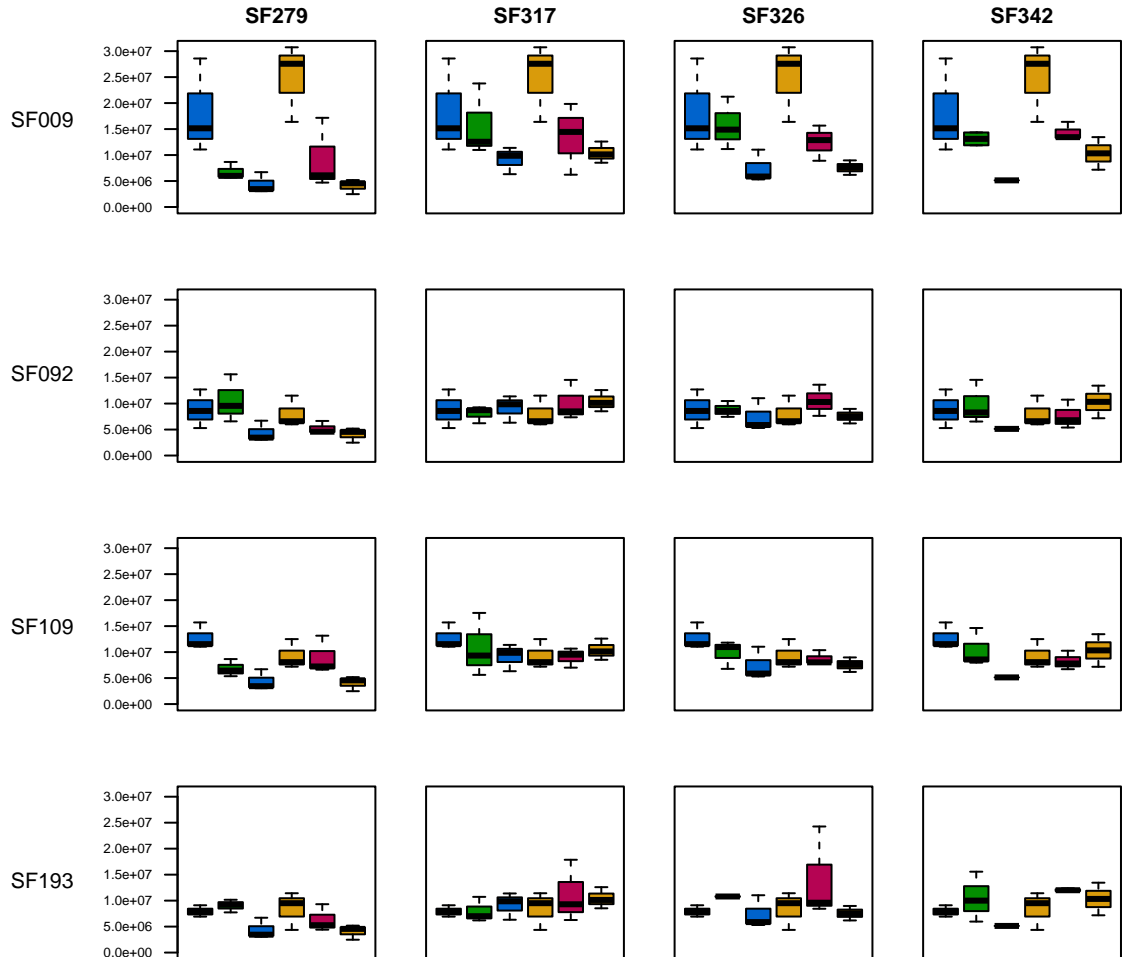



HanXRQChr11g0342691  
 Probable class II aminoacyl-tRNA and  
 biotin synthetases superfamily protein

Parents WW  
 Parents WD  
 Hybrids WW  
 Hybrids WD

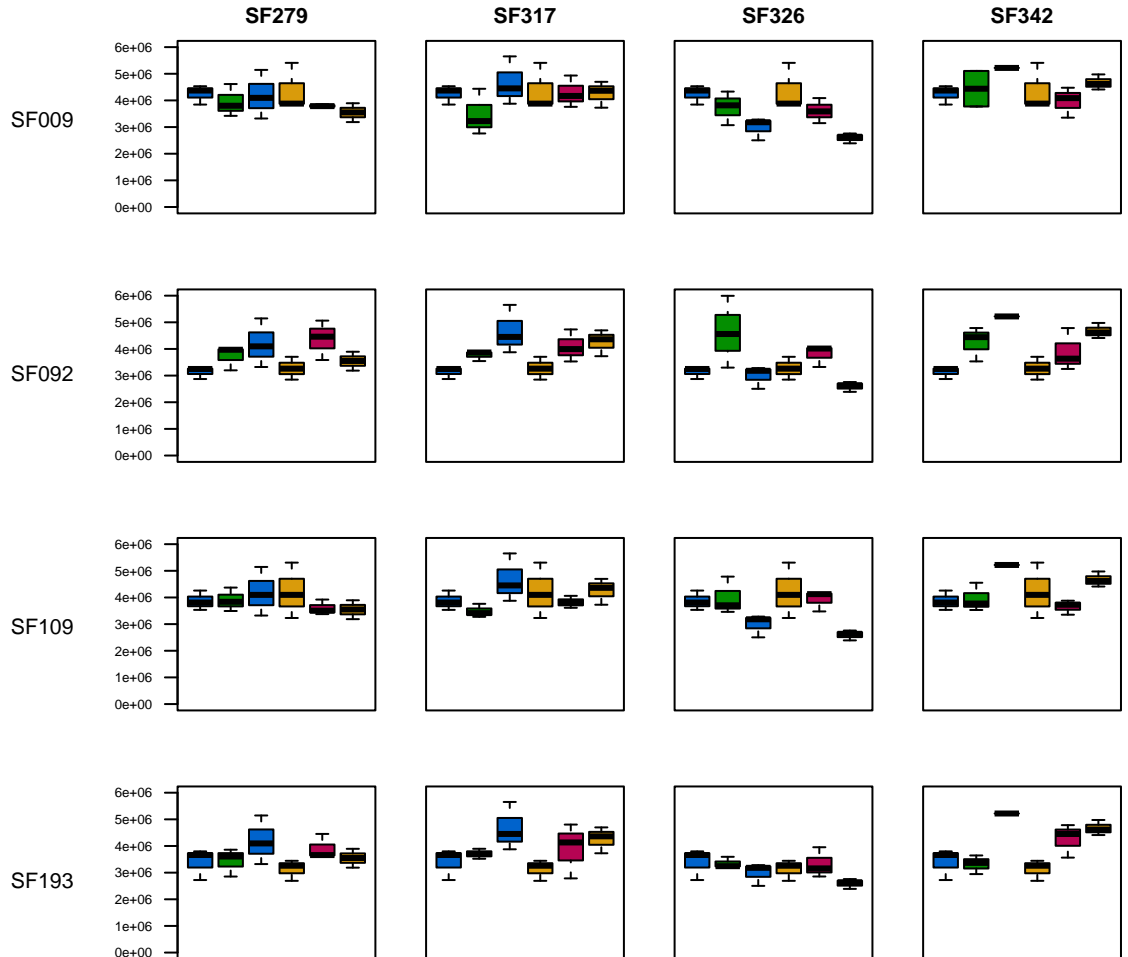

HanXRQChr10g0292911  
Probable cytochrome b-c1 complex,  
subunit 8 protein

Parents WW  
Parents WD  
Hybrids WW  
Hybrids WD

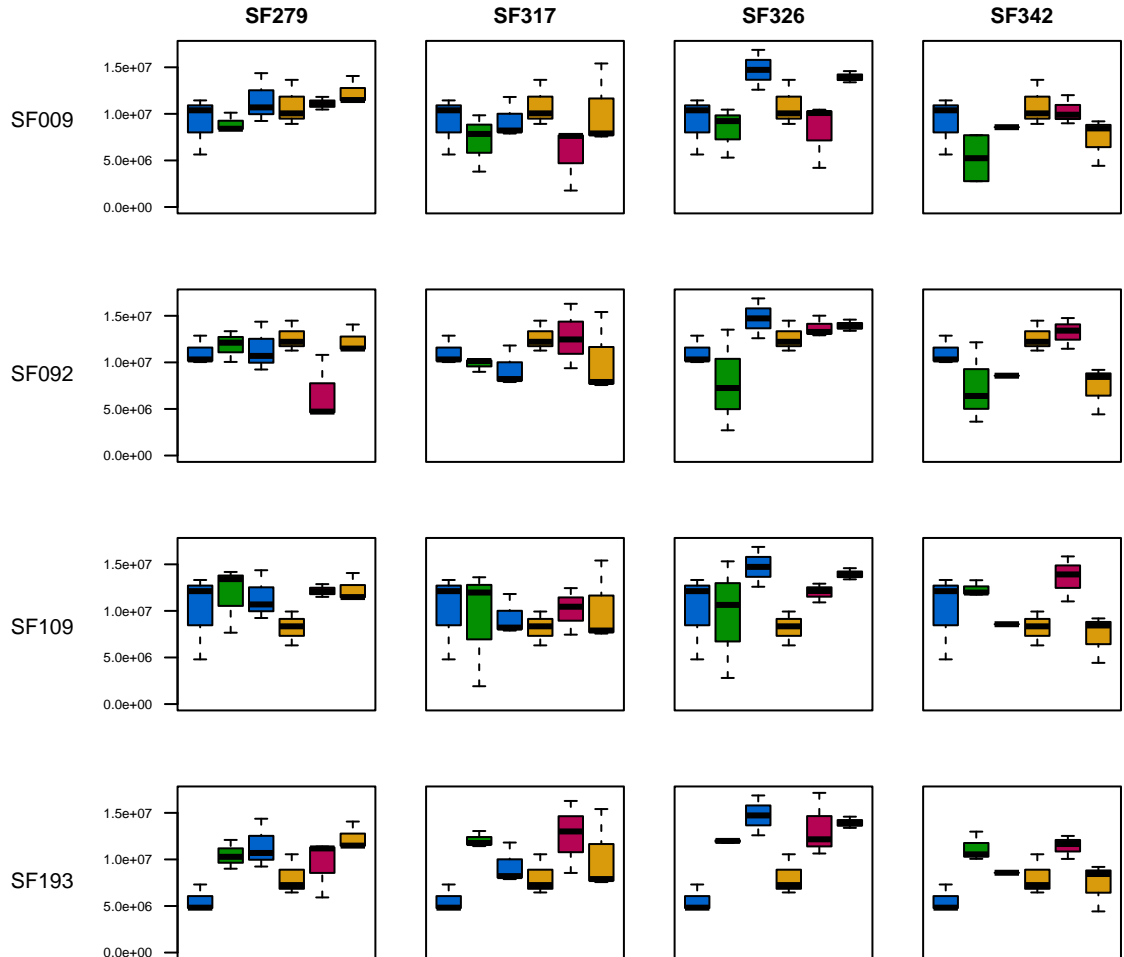

HanXRQChr16g0512491  
 Probable pyrophosphate--fructose  
 6-phosphate 1-phosphotransferase subunit

Parents WW  
 Parents WD  
 Hybrids WW  
 Hybrids WD

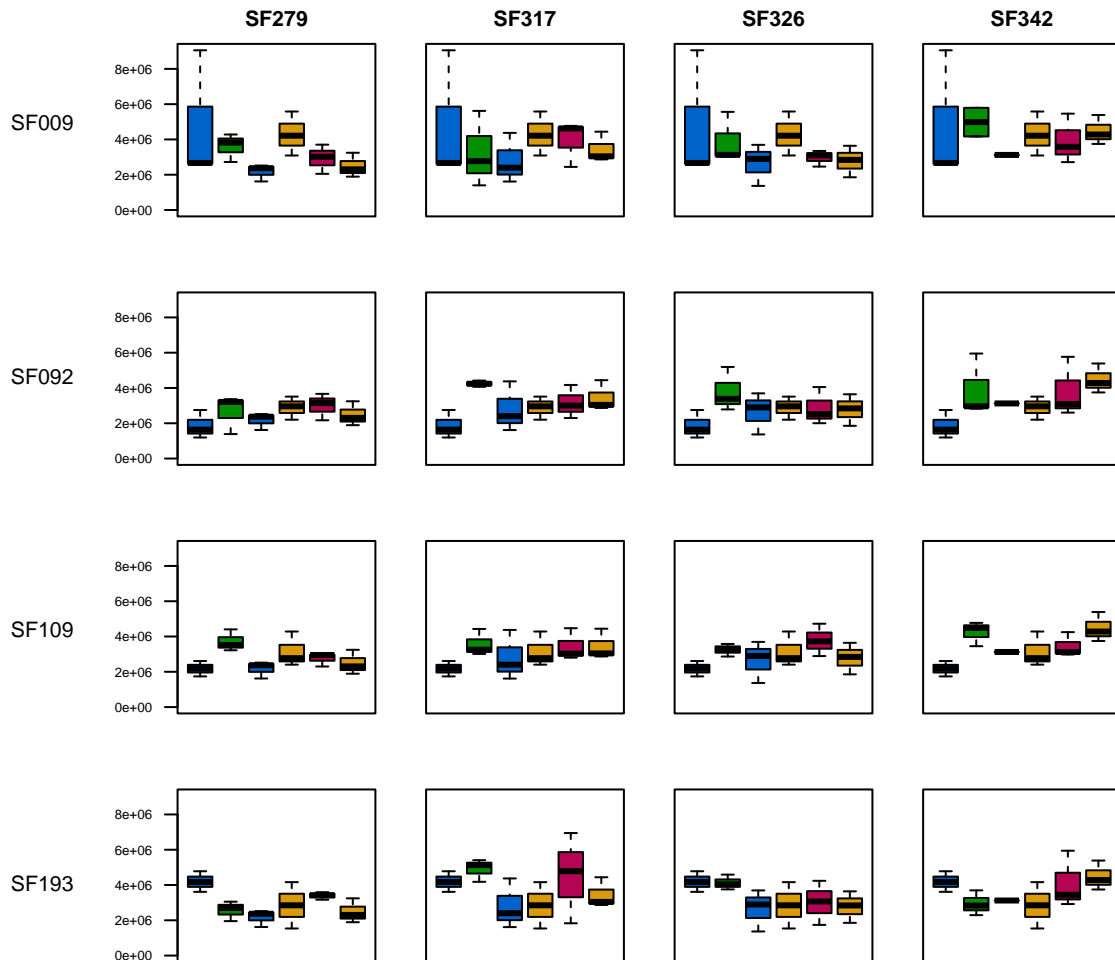

HanXRQChr02g0044461  
 Probable L-ascorbate peroxidase,  
 cytosolic

■ Parents WW  
 ■ Parents WD  
 ■ Hybrids WW  
 ■ Hybrids WD

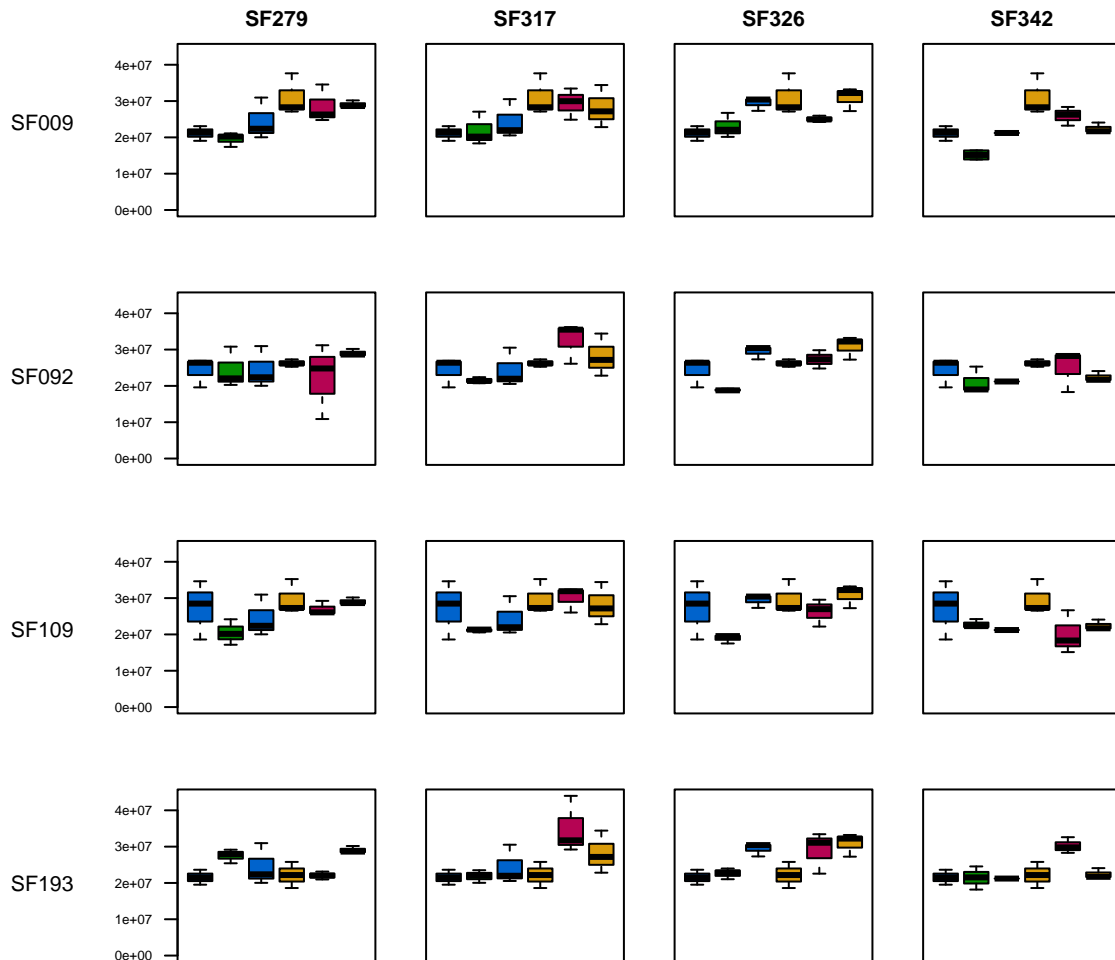

HanXRQChr14g0458921  
Putative HSP20-like chaperone; Small  
heat shock protein HSP20

Parents WW  
Parents WD  
Hybrids WW  
Hybrids WD

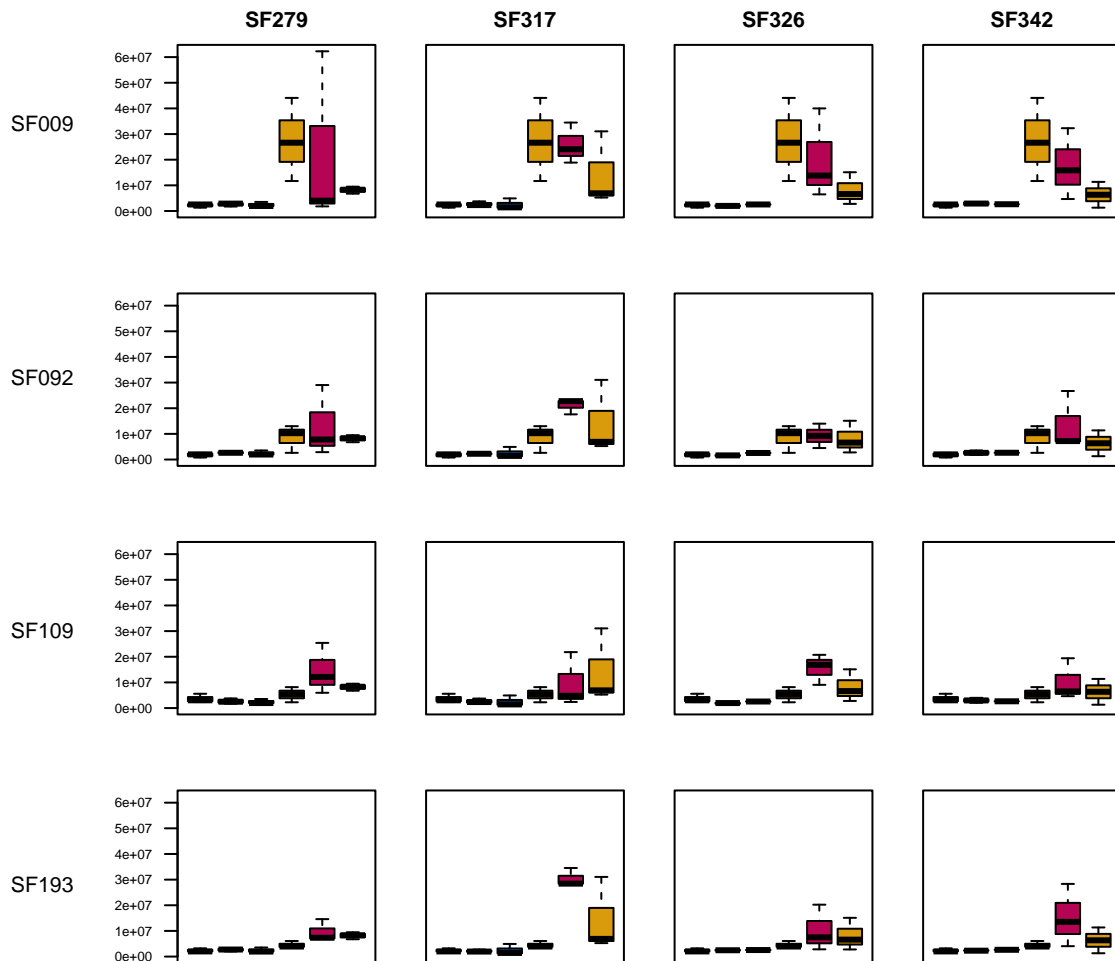

HanXRQChr09g0255971  
Probable cytochrome C1 family

Parents WW  
Parents WD  
Hybrids WW  
Hybrids WD

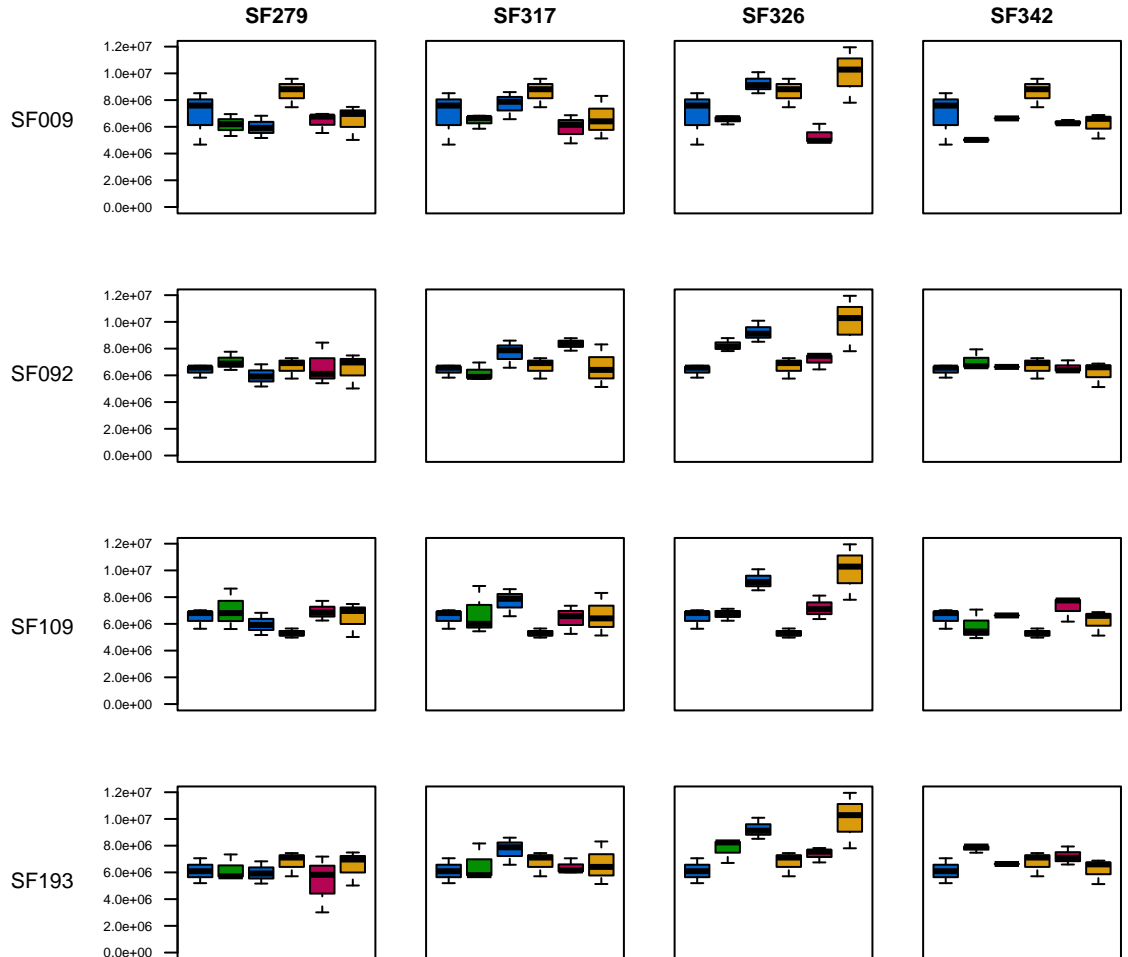

HanXRQChr07g0203121  
Probable plastid ribosomal protein l11

- Parents WW
- Parents WD
- Hybrids WW
- Hybrids WD

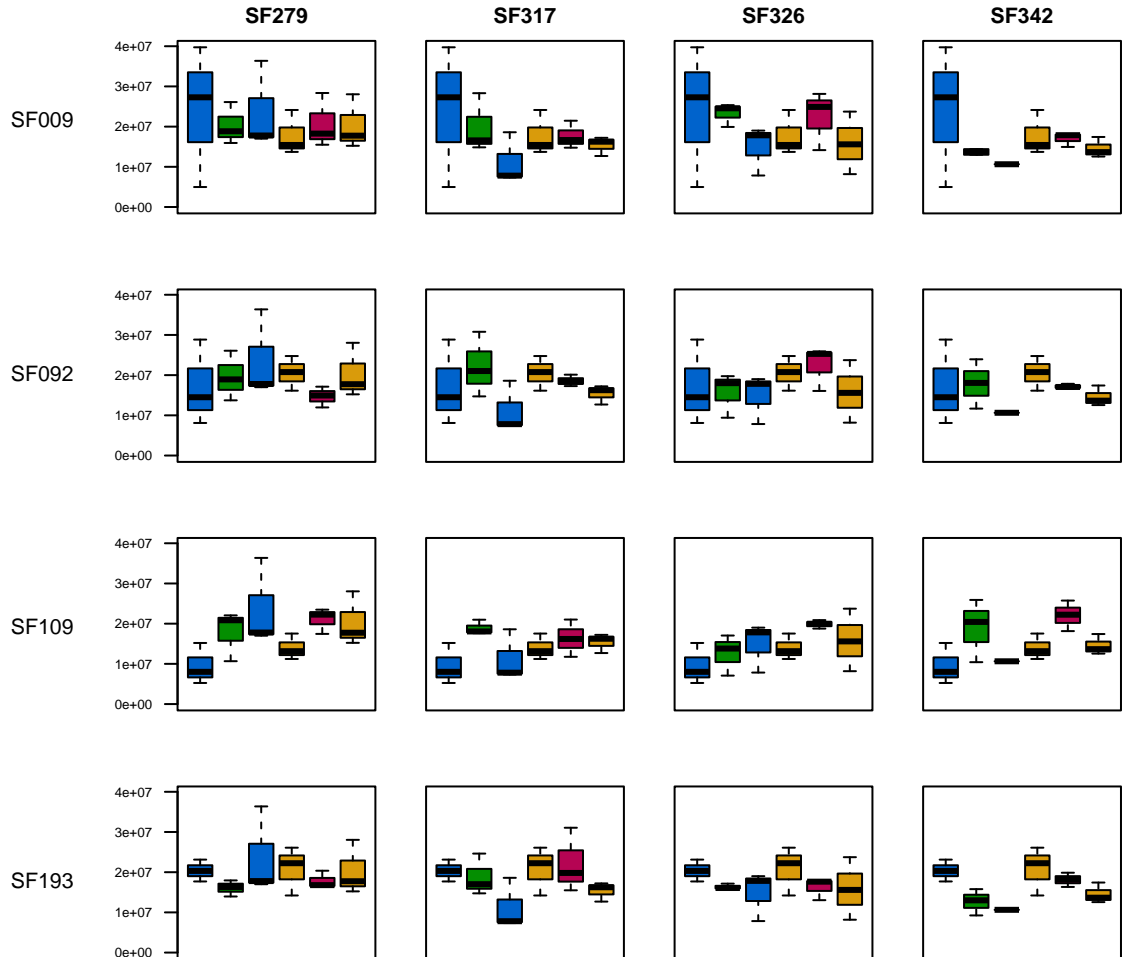

HanXRQChr04g0106961  
Putative ribosomal protein S8

Parents WW  
Parents WD  
Hybrids WW  
Hybrids WD

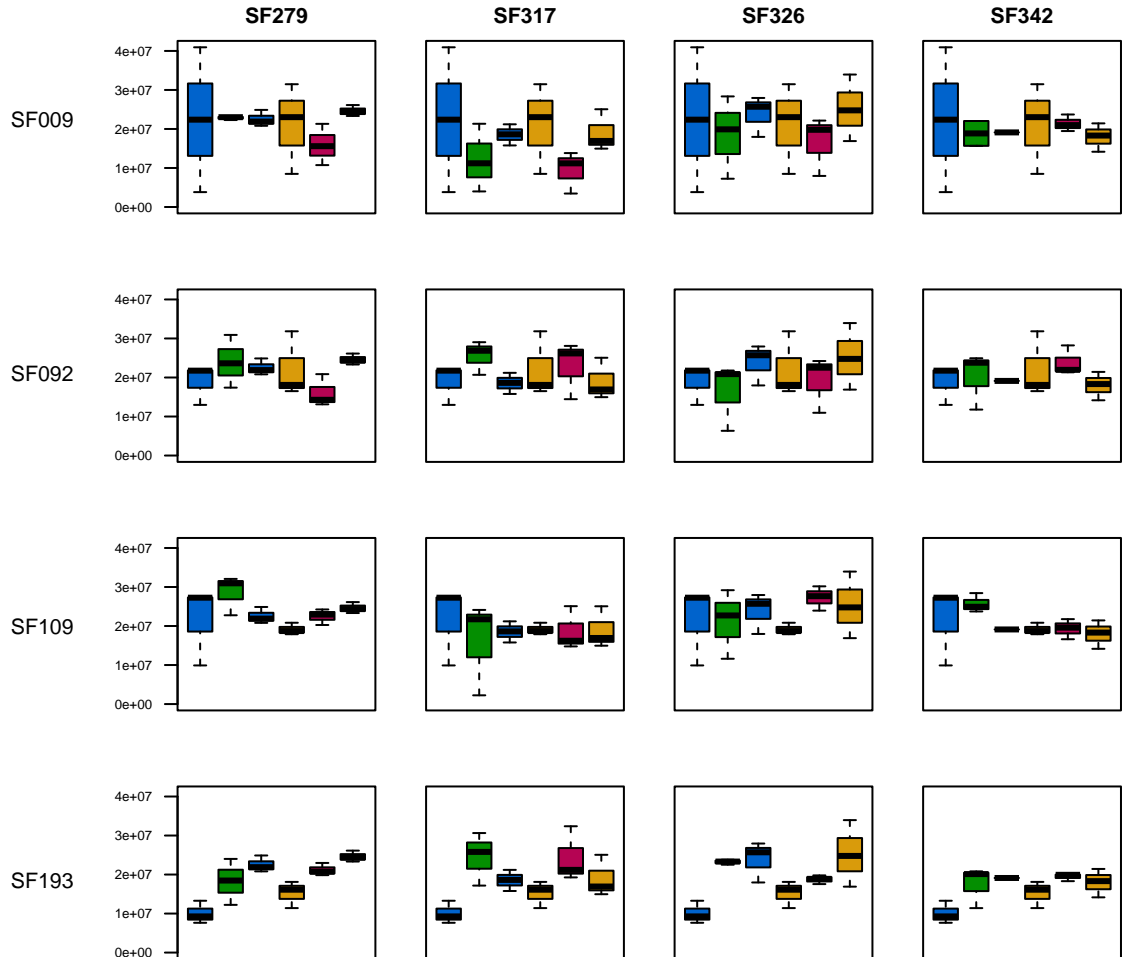



HanXRQChr12g0362991  
Putative metalloenzyme, LuxS/M16  
peptidase-like

Parents WW  
Parents WD  
Hybrids WW  
Hybrids WD

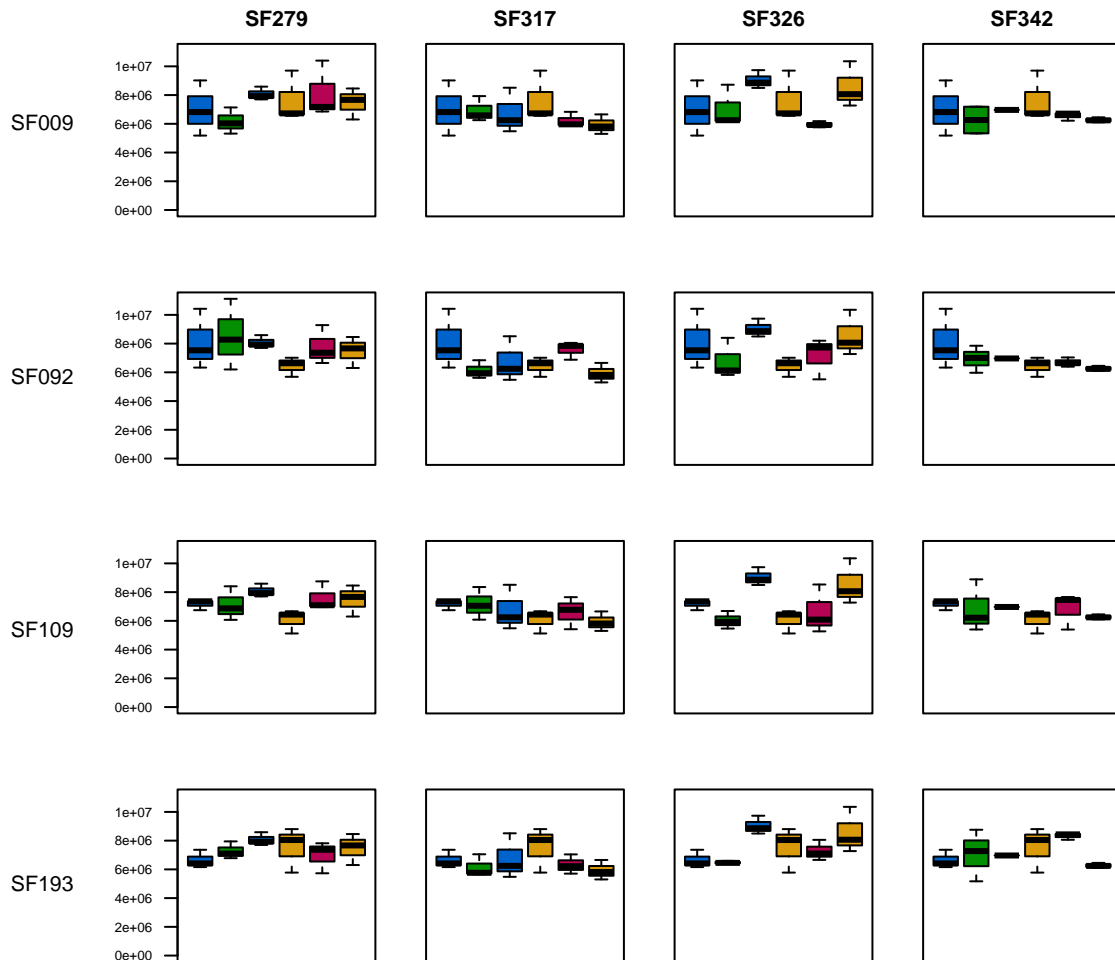

HanXRQChr11g0327281  
Probable photosystem I reaction center  
subunit IV, chloroplastic

Parents WW  
Parents WD  
Hybrids WW  
Hybrids WD

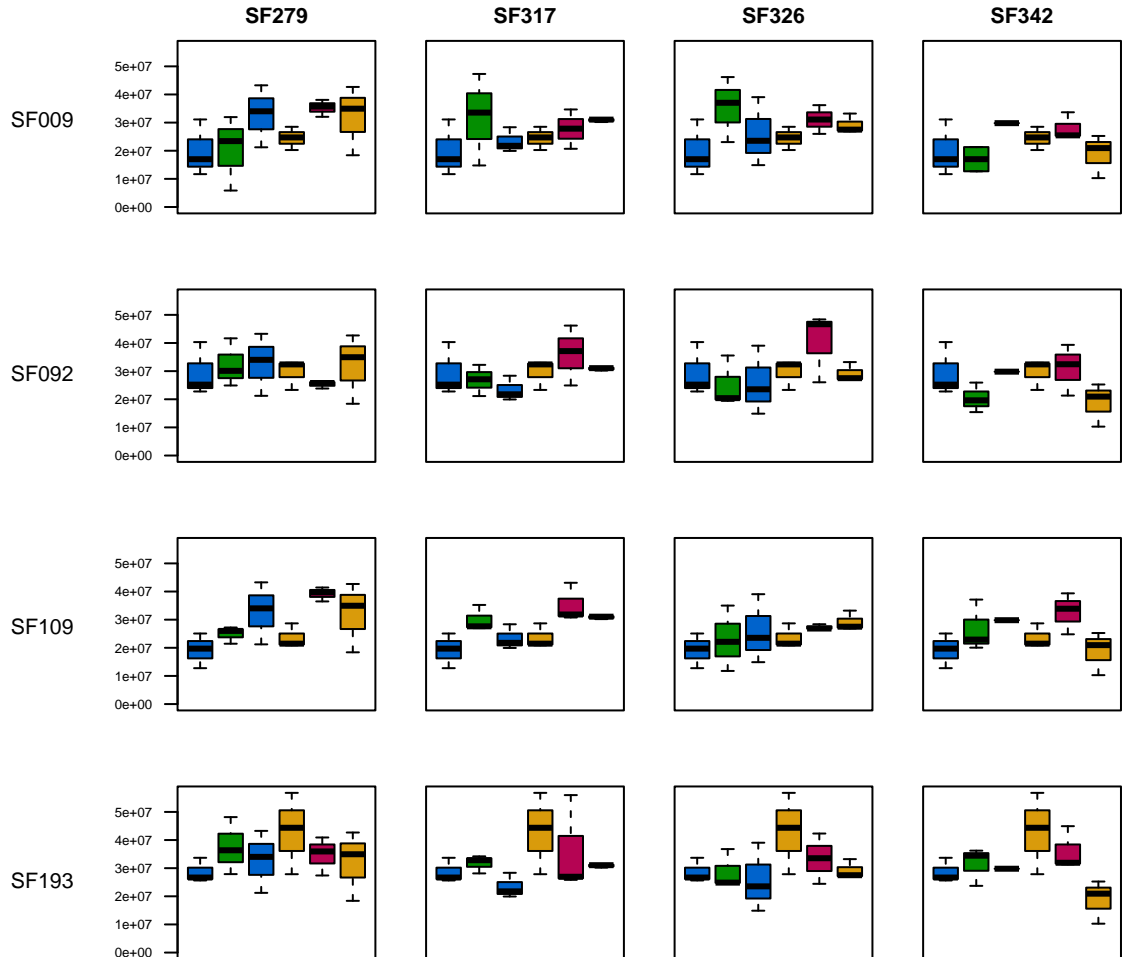

HanXRQChr04g0118261  
Probable RAN GTPase activating protein 1

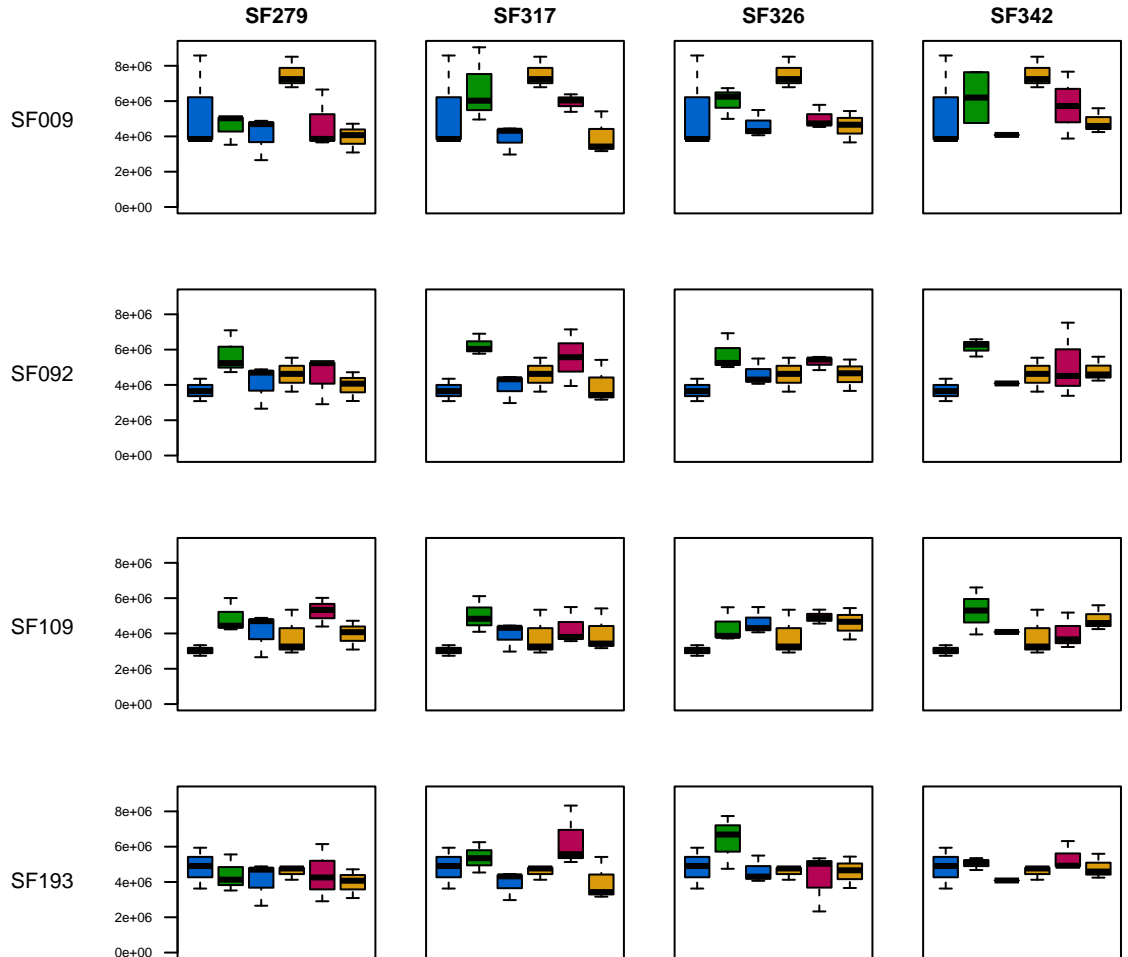

HanXRQChr09g0273081  
Probable elongation factor 1-delta

Parents WW  
Parents WD  
Hybrids WW  
Hybrids WD

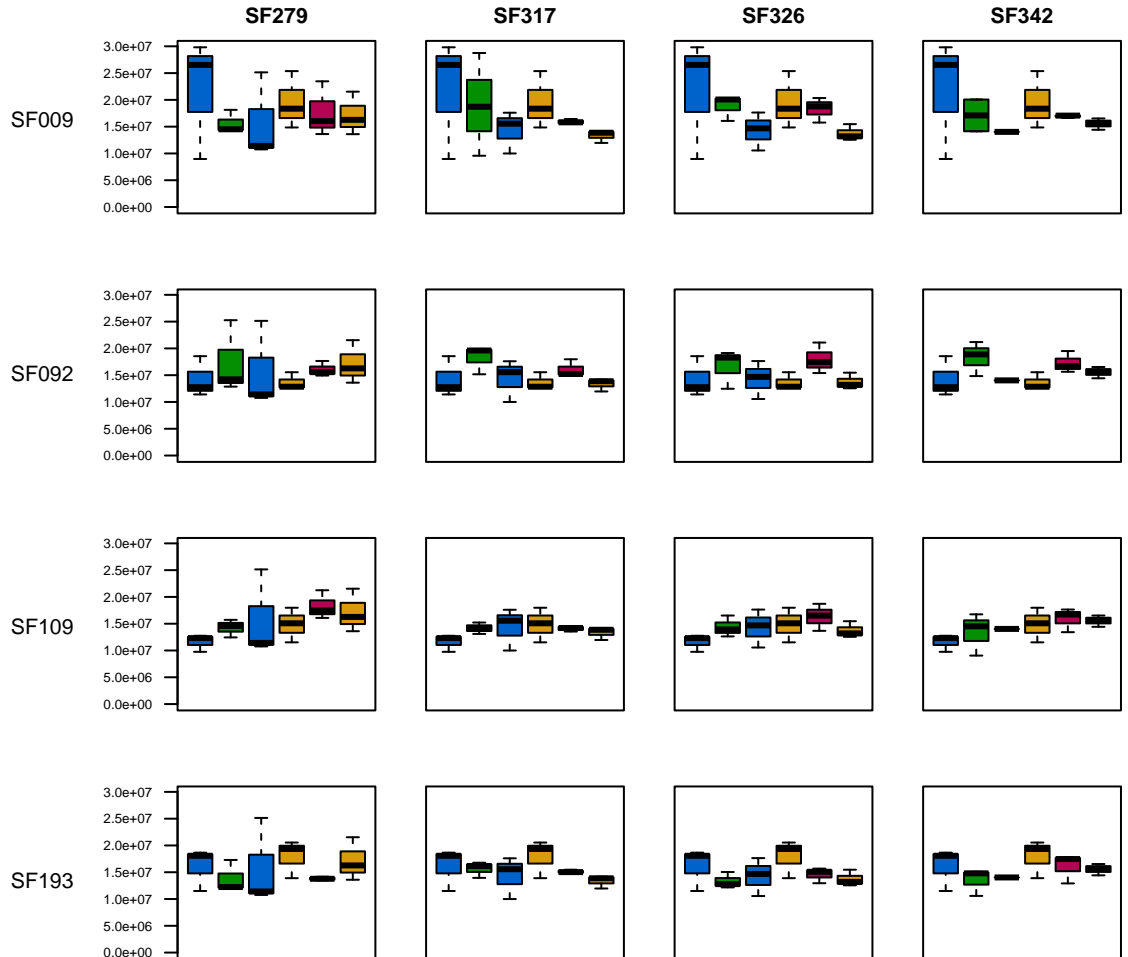

HanXRQChr11g0332801  
Probable ribosomal protein L19 family  
protein

Parents WW  
Parents WD  
Hybrids WW  
Hybrids WD

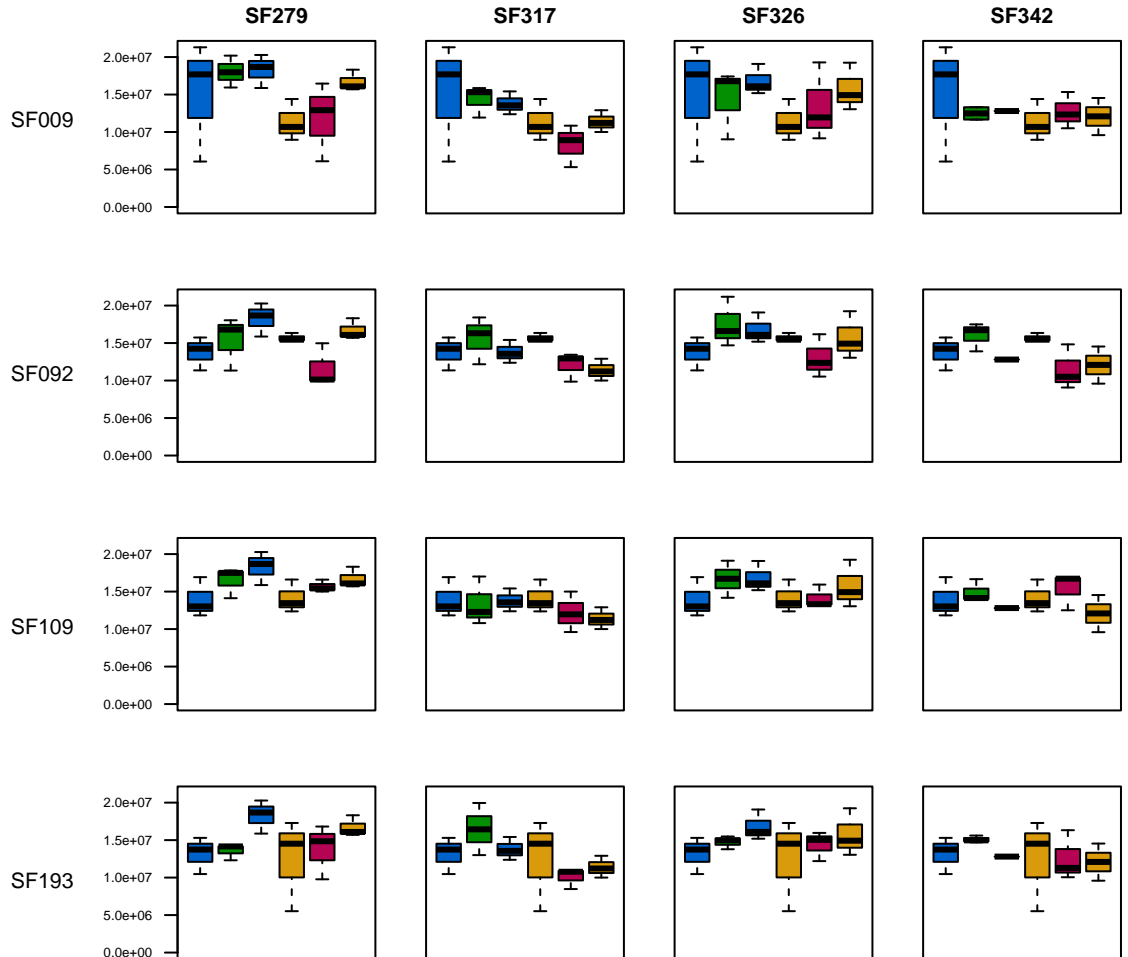

HanXRQChr14g0432581  
Probable aldolase superfamily protein

Parents WW  
Parents WD  
Hybrids WW  
Hybrids WD

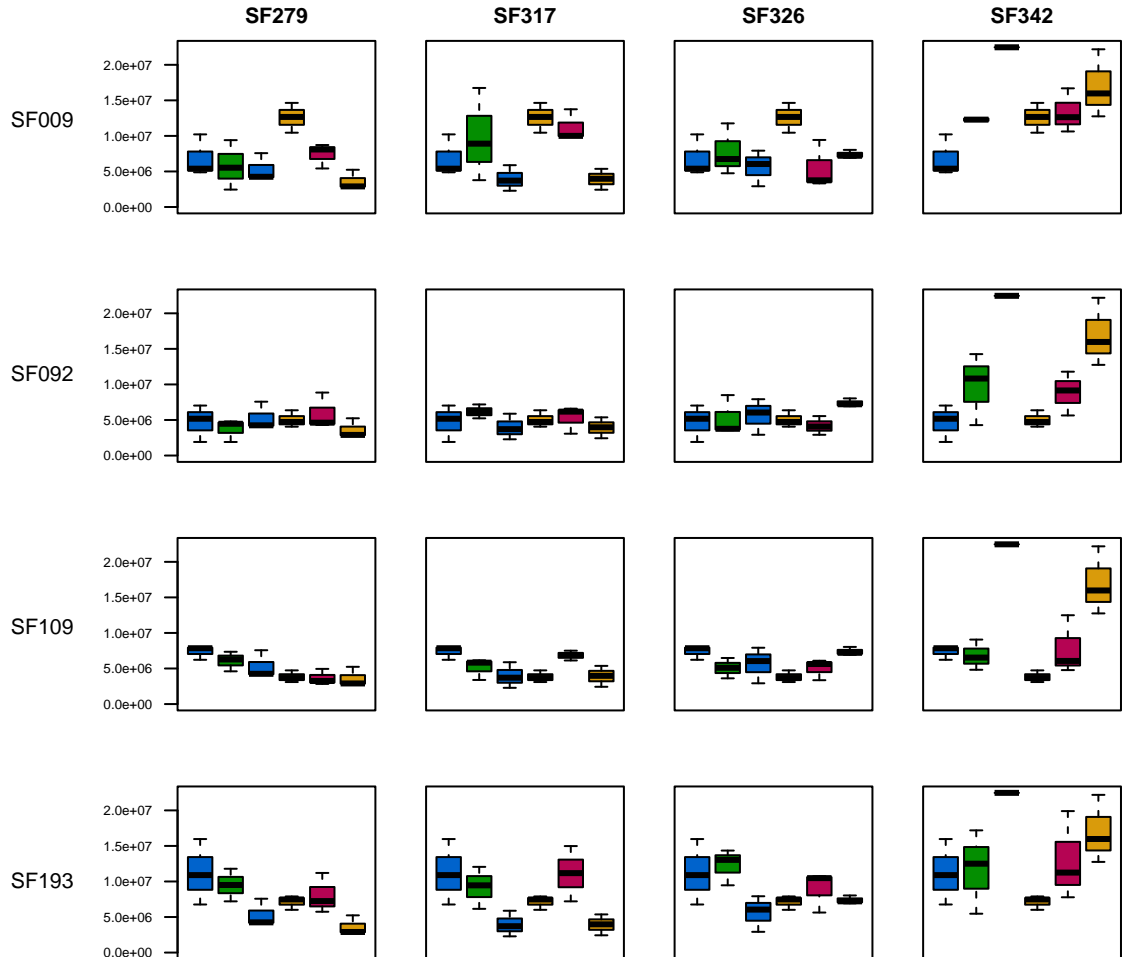

HanXRQChr14g0428291  
Uncharacterized conserved protein

Parents WW  
Parents WD  
Hybrids WW  
Hybrids WD

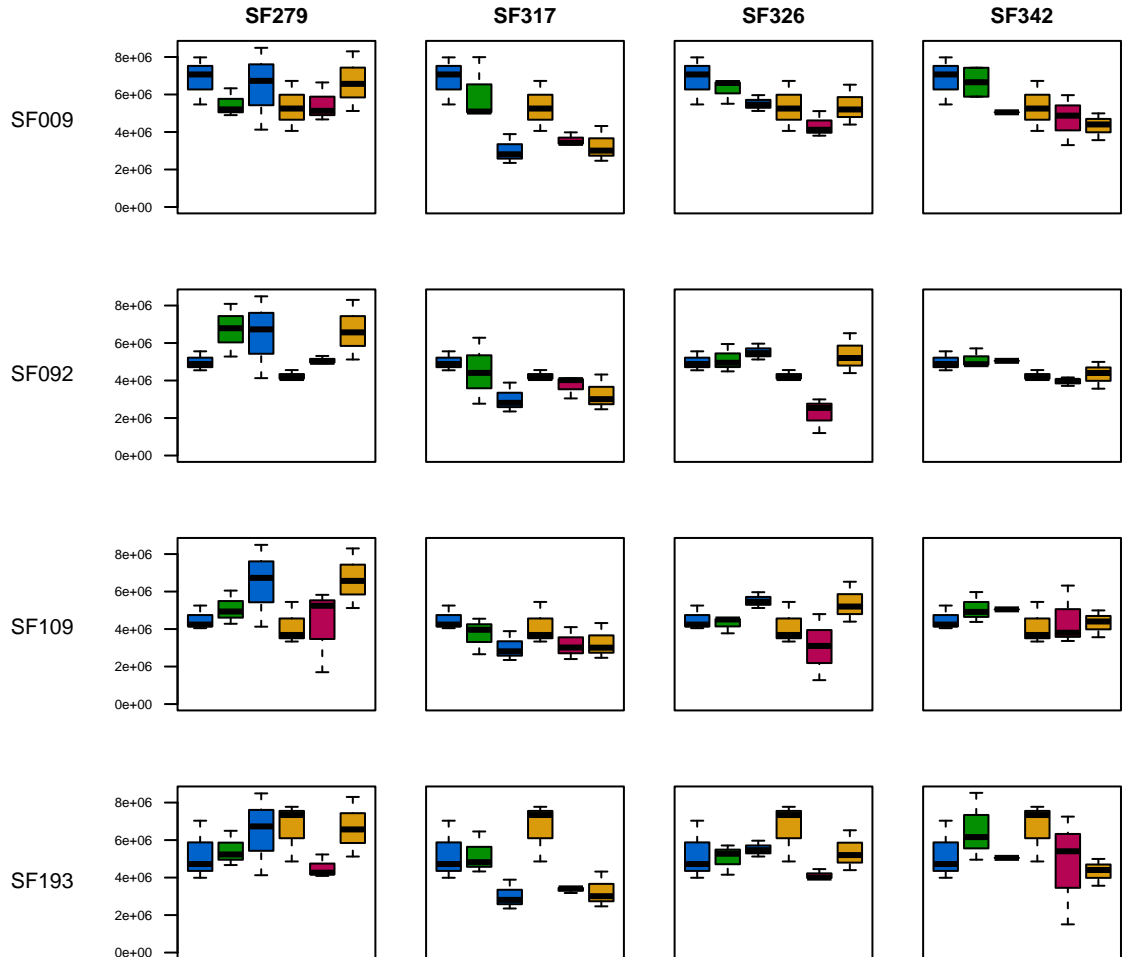

HanXRQChr16g0521511  
Probable P-loop containing nucleoside  
triphosphate hydrolases superfamily protein

Parents WW  
Parents WD  
Hybrids WW  
Hybrids WD

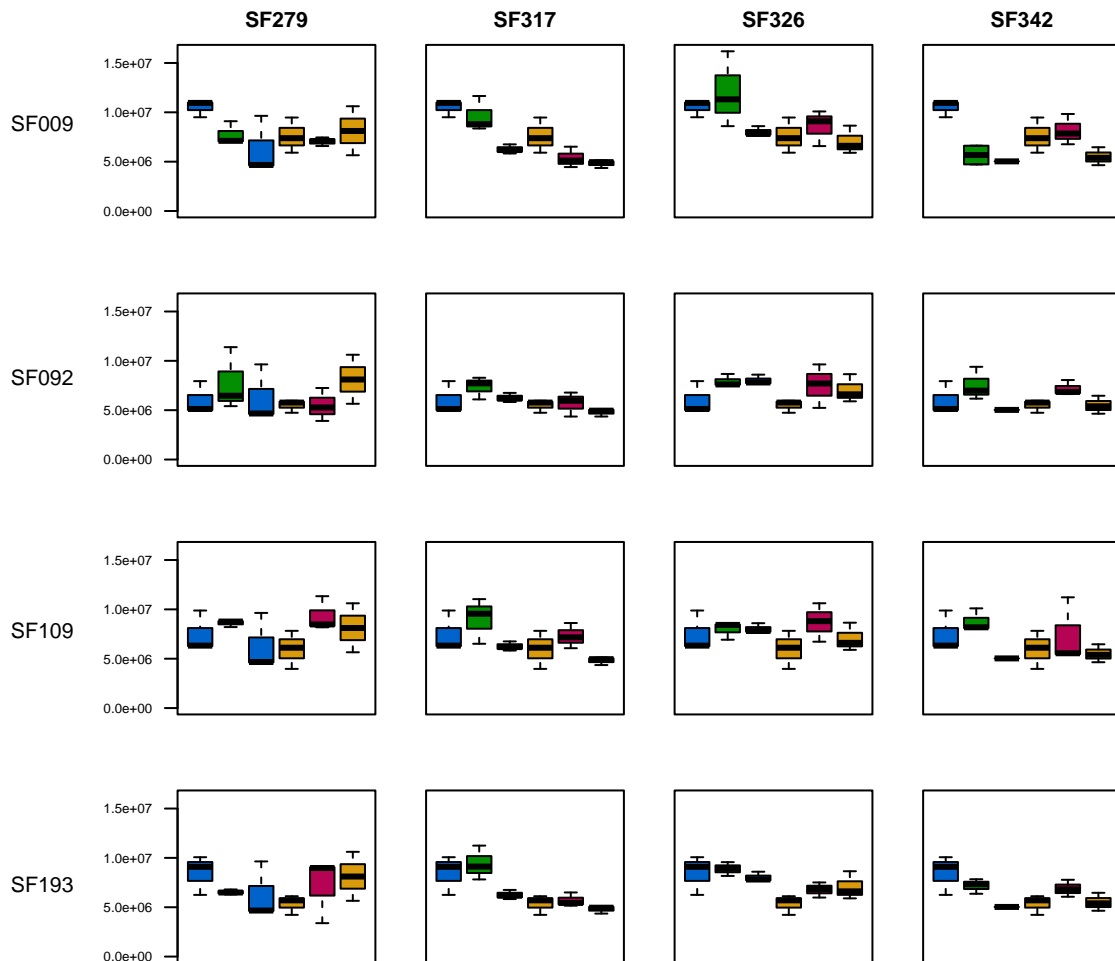



HanXRQChr08g0229391  
Putative cyclophilin-type  
peptidyl-prolyl cis-trans isomerase domain

Parents WW  
Parents WD  
Hybrids WW  
Hybrids WD

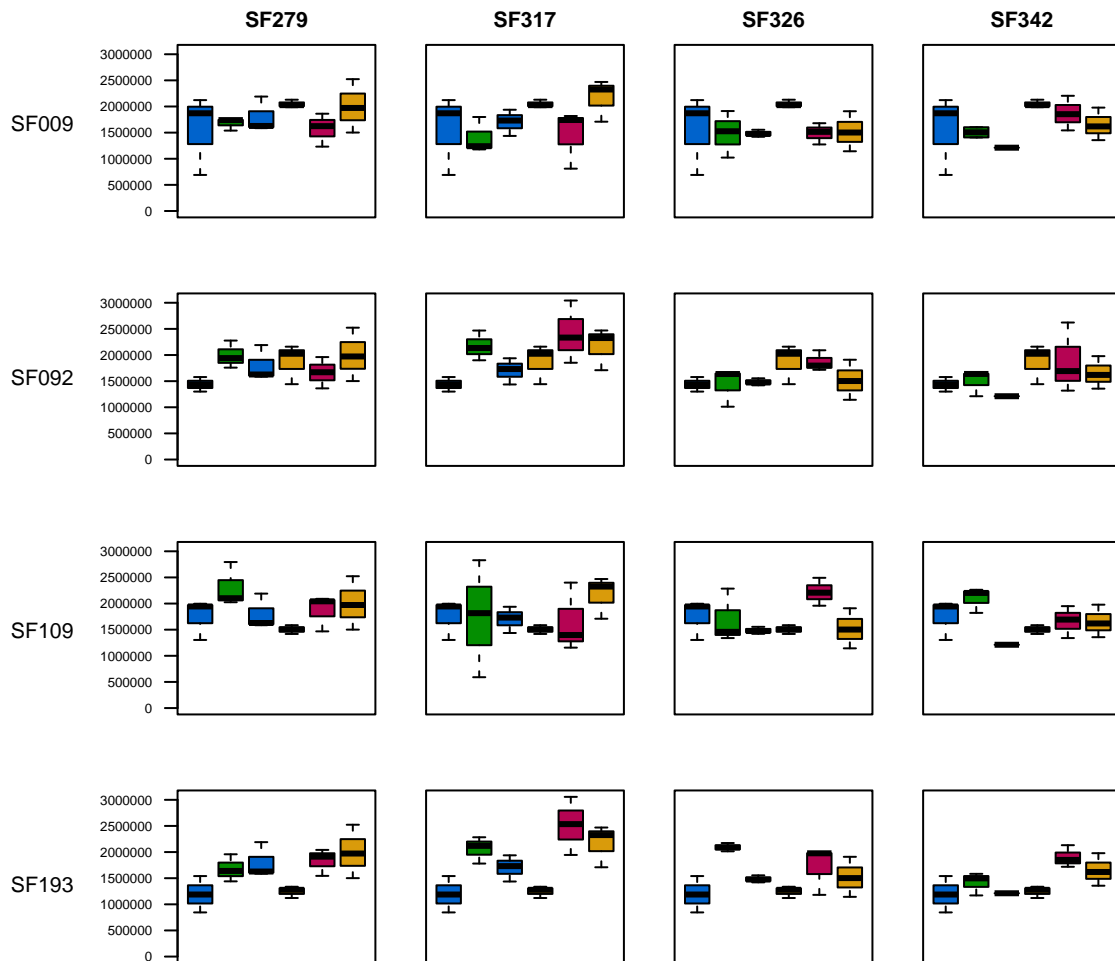

HanXRQChr15g0491901  
Probable peptidyl-prolyl cis-trans  
isomerase FKBP12

Parents WW  
Parents WD  
Hybrids WW  
Hybrids WD

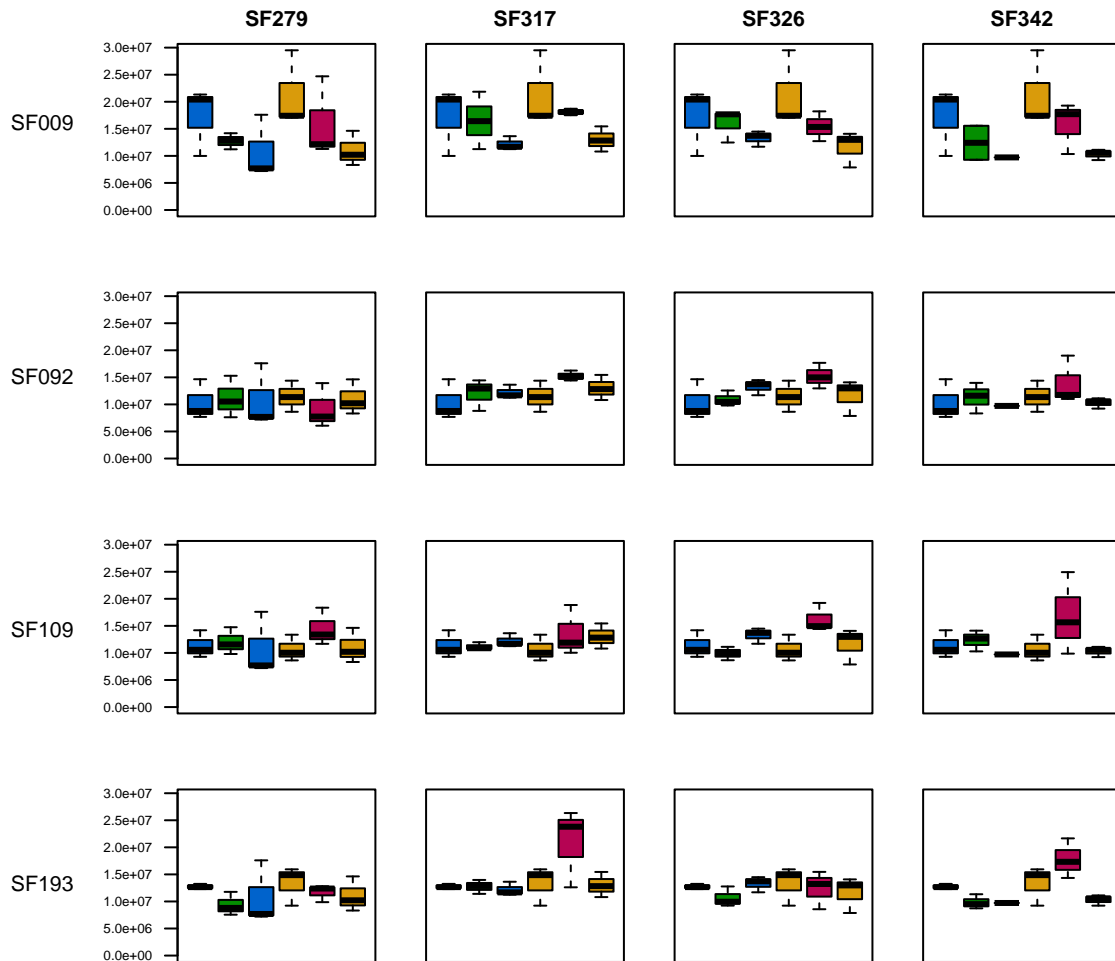

HanXRQChr03g0084971  
Probable vacuolar H<sup>+</sup>-ATPase subunit E  
isoform 3

Parents WW  
Parents WD  
Hybrids WW  
Hybrids WD

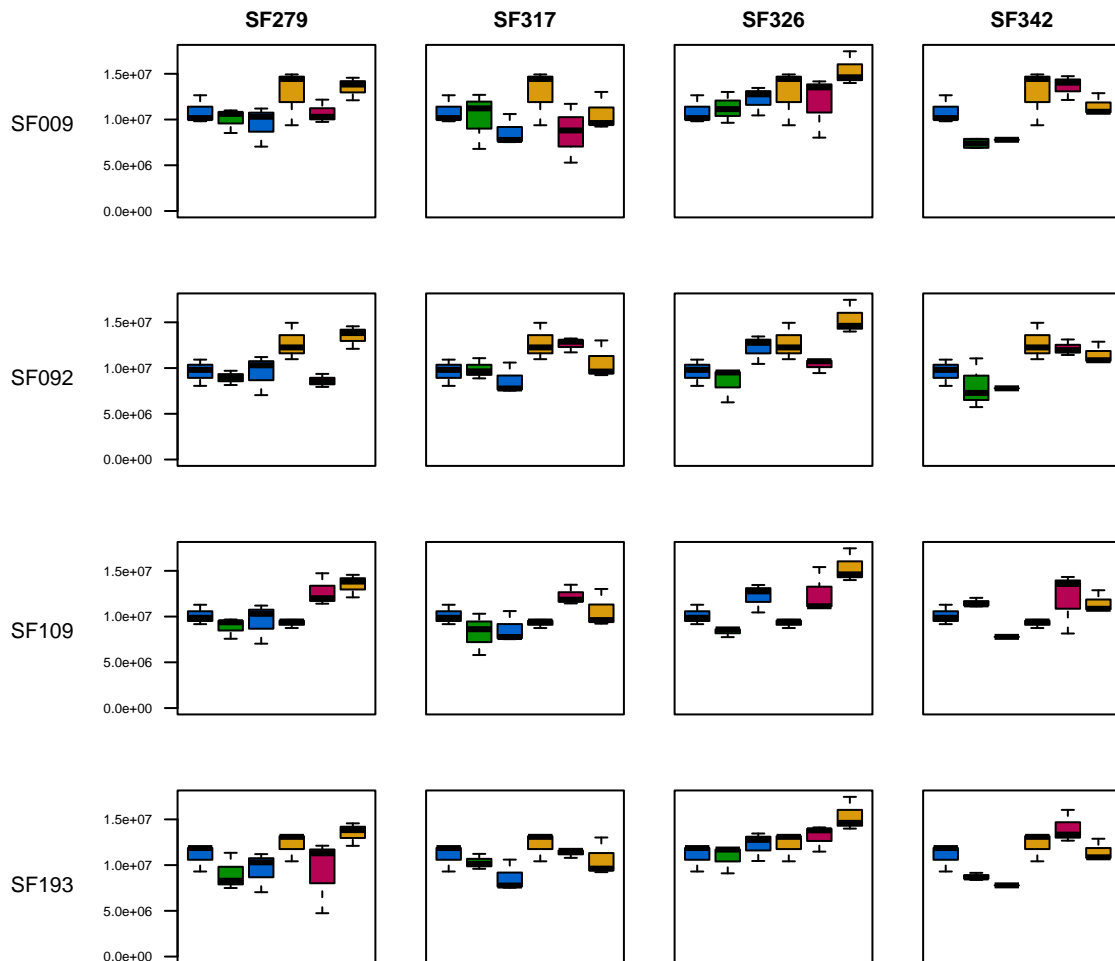

HanXRQChr12g0357171  
Probable pyrophosphate-energized  
vacuolar membrane proton pump

Parents WW  
Parents WD  
Hybrids WW  
Hybrids WD

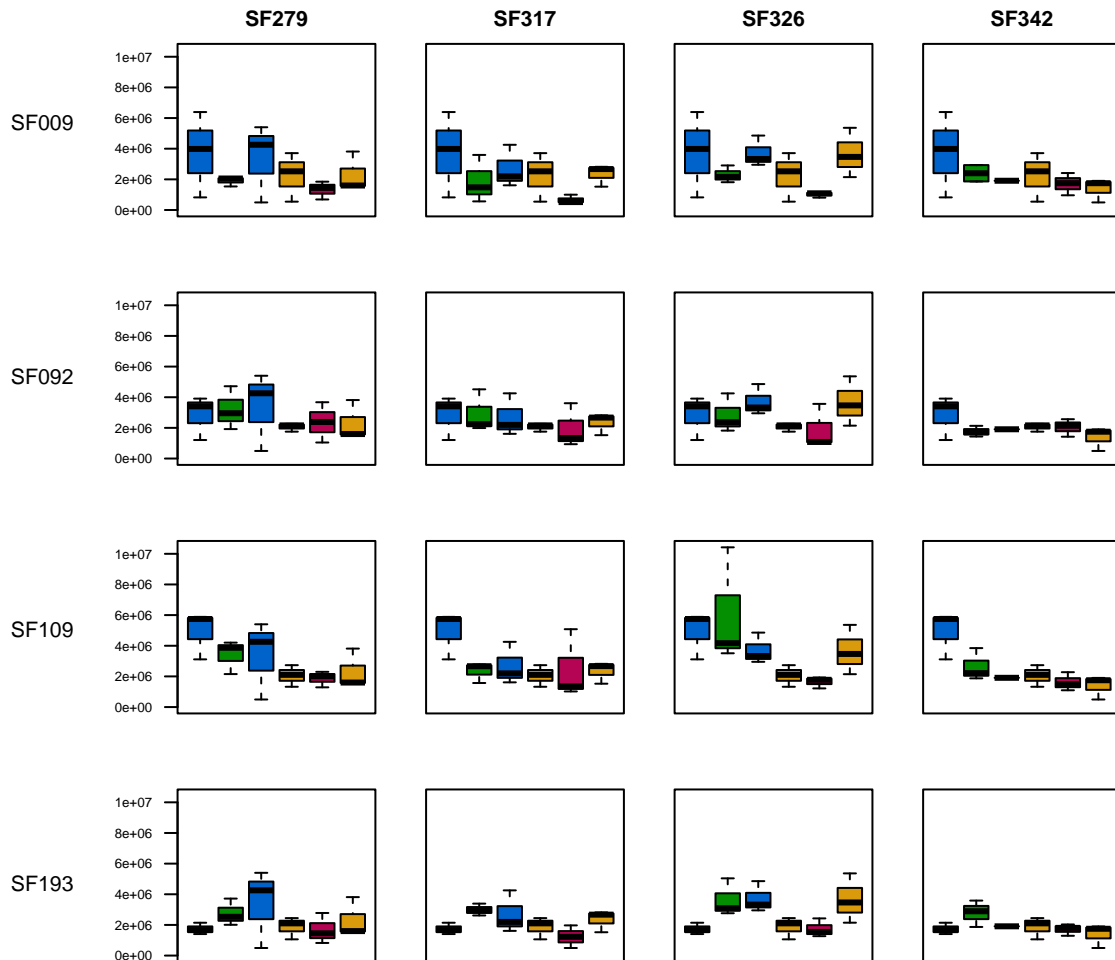

HanXRQChr09g0247171  
 Probable 50S ribosomal protein L10,  
 chloroplastic

Parents WW  
 Parents WD  
 Hybrids WW  
 Hybrids WD

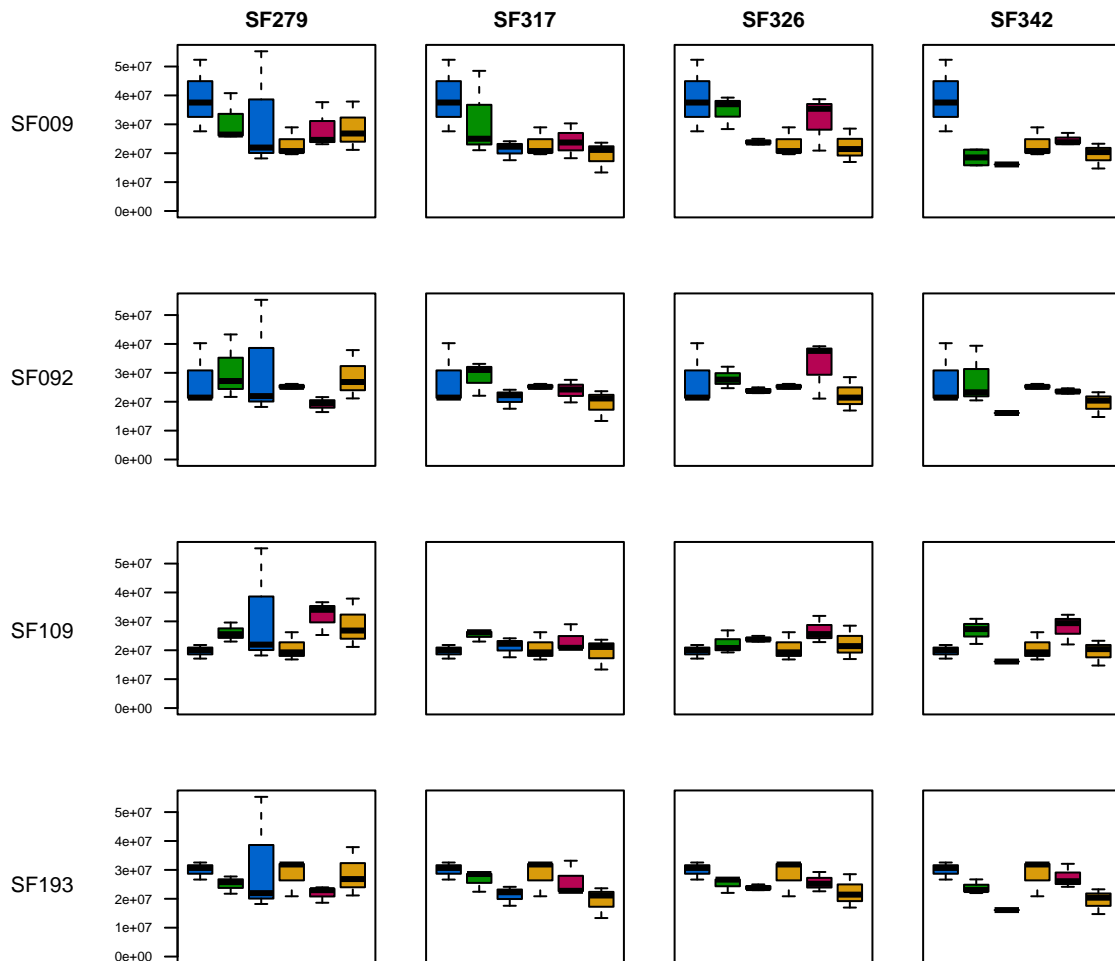

HanXRQChr01g0004411  
Probable photosystem II subunit Q-2

Parents WW  
Parents WD  
Hybrids WW  
Hybrids WD

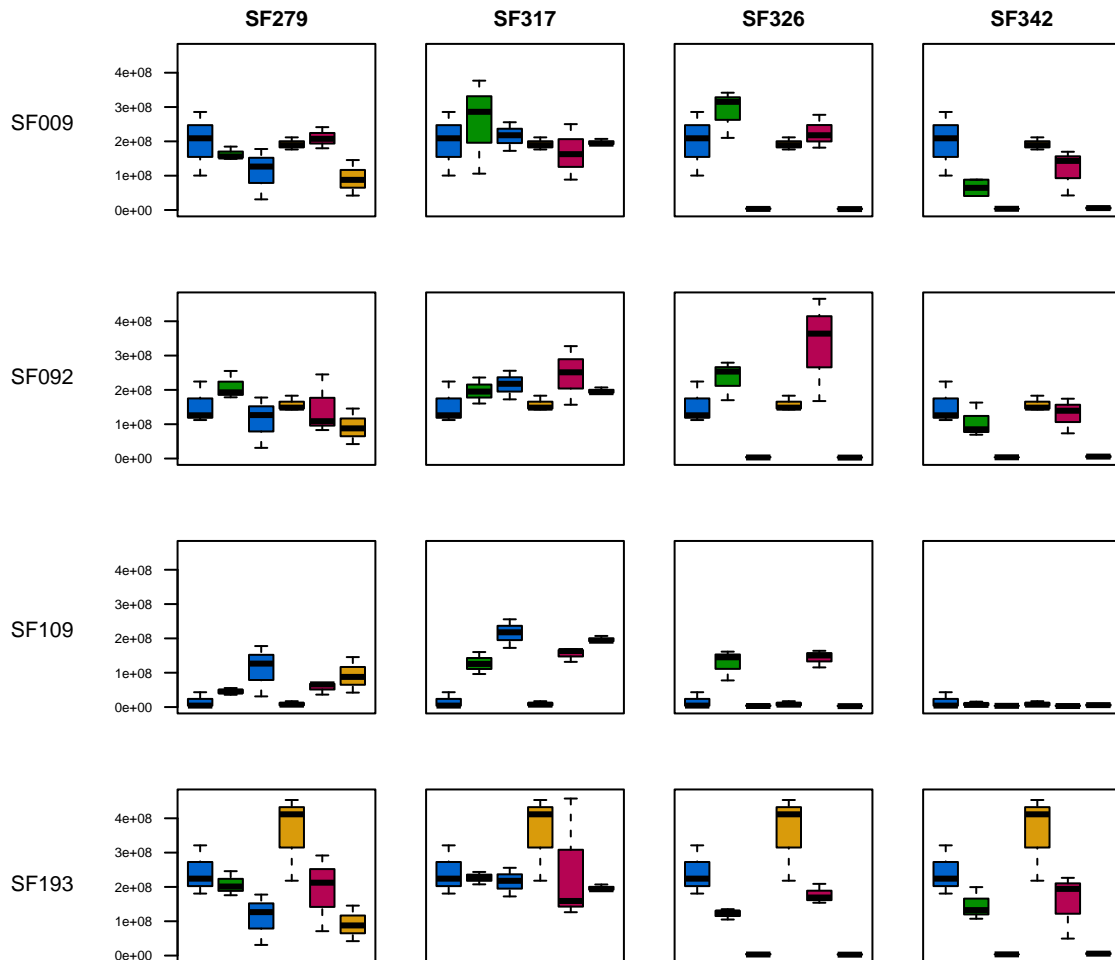

HanXRQChr08g0235231  
Probable 31 kDa ribonucleoprotein,  
chloroplastic

Parents WW  
Parents WD  
Hybrids WW  
Hybrids WD

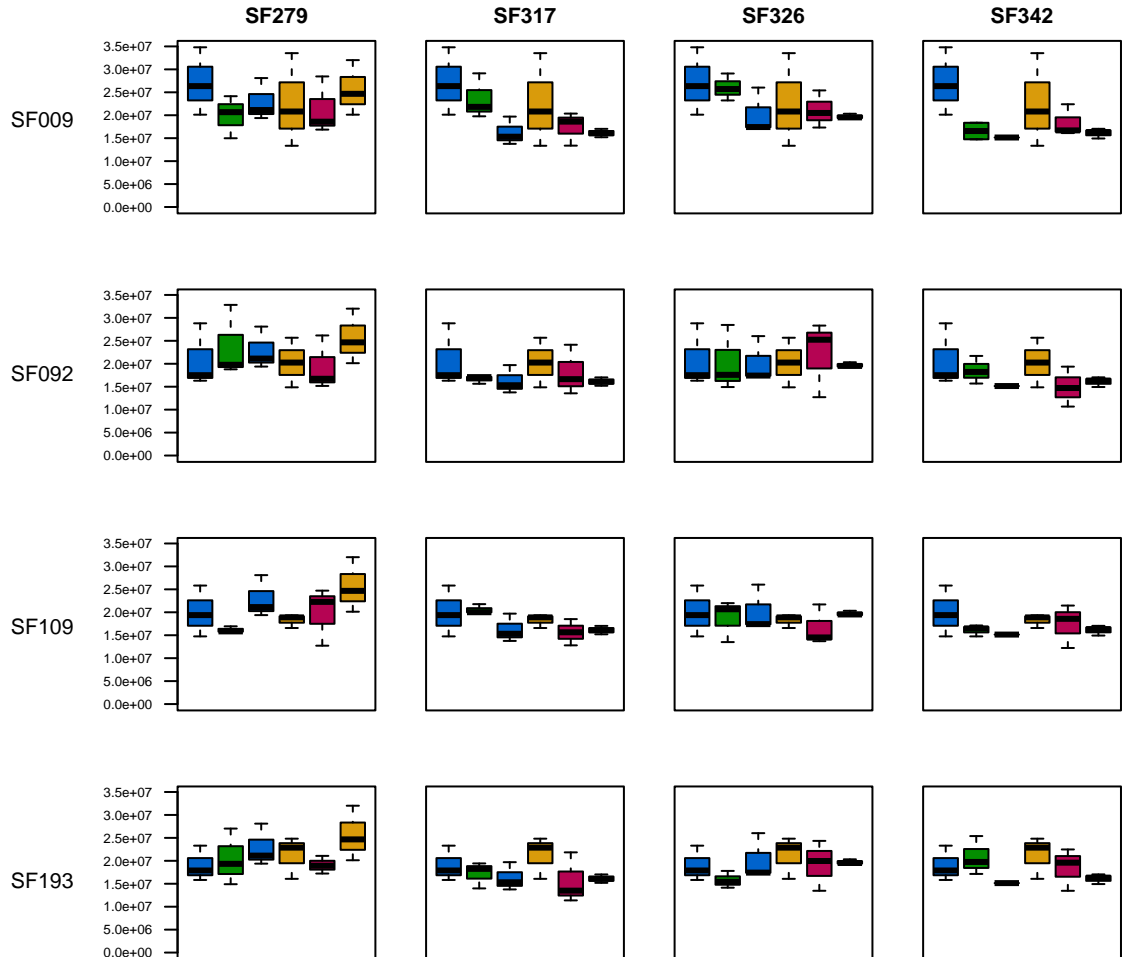

HanXRQChr02g0050031  
Probable phosphoribulokinase,  
chloroplastic

Parents WW  
Parents WD  
Hybrids WW  
Hybrids WD

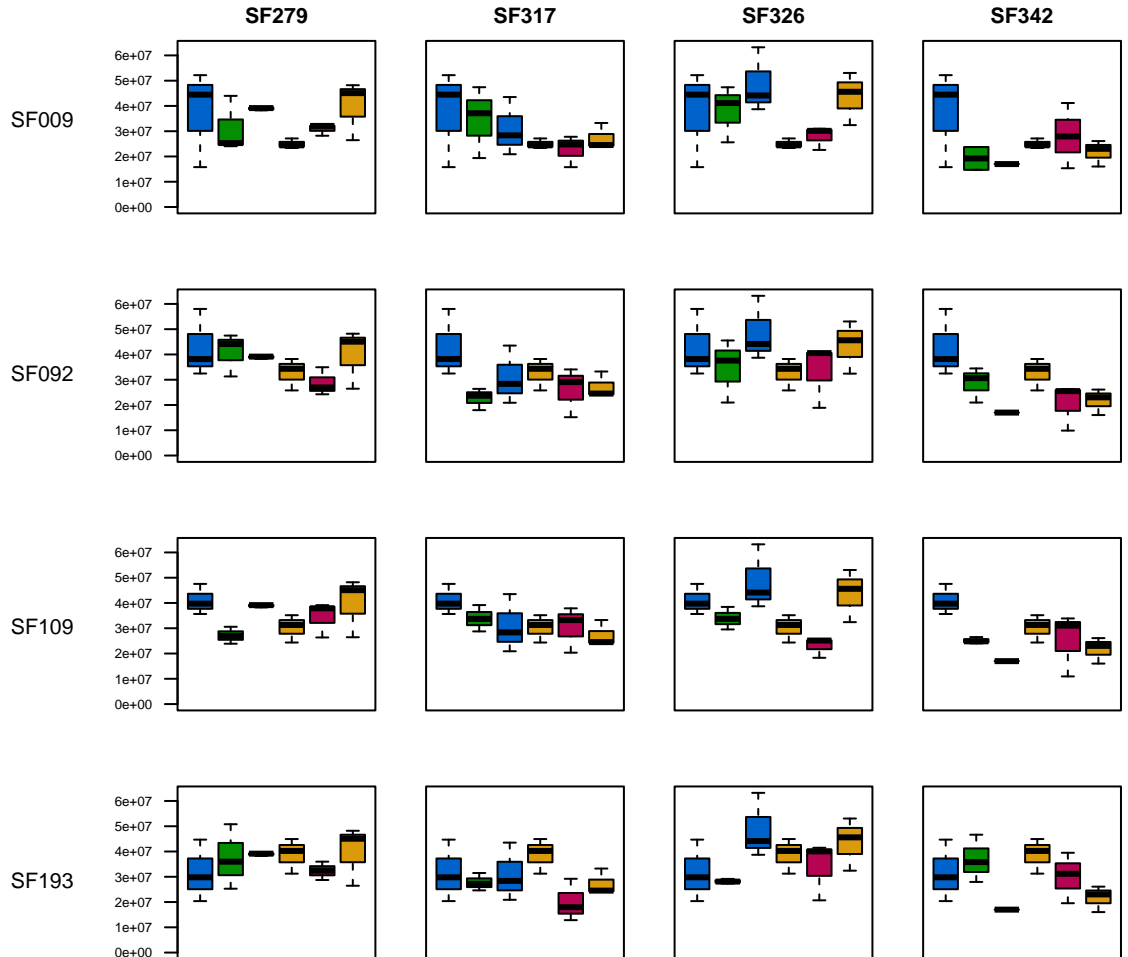



HanXRQChr07g0197971  
Probable acetyl-coenzyme A synthetase

Parents WW  
Parents WD  
Hybrids WW  
Hybrids WD

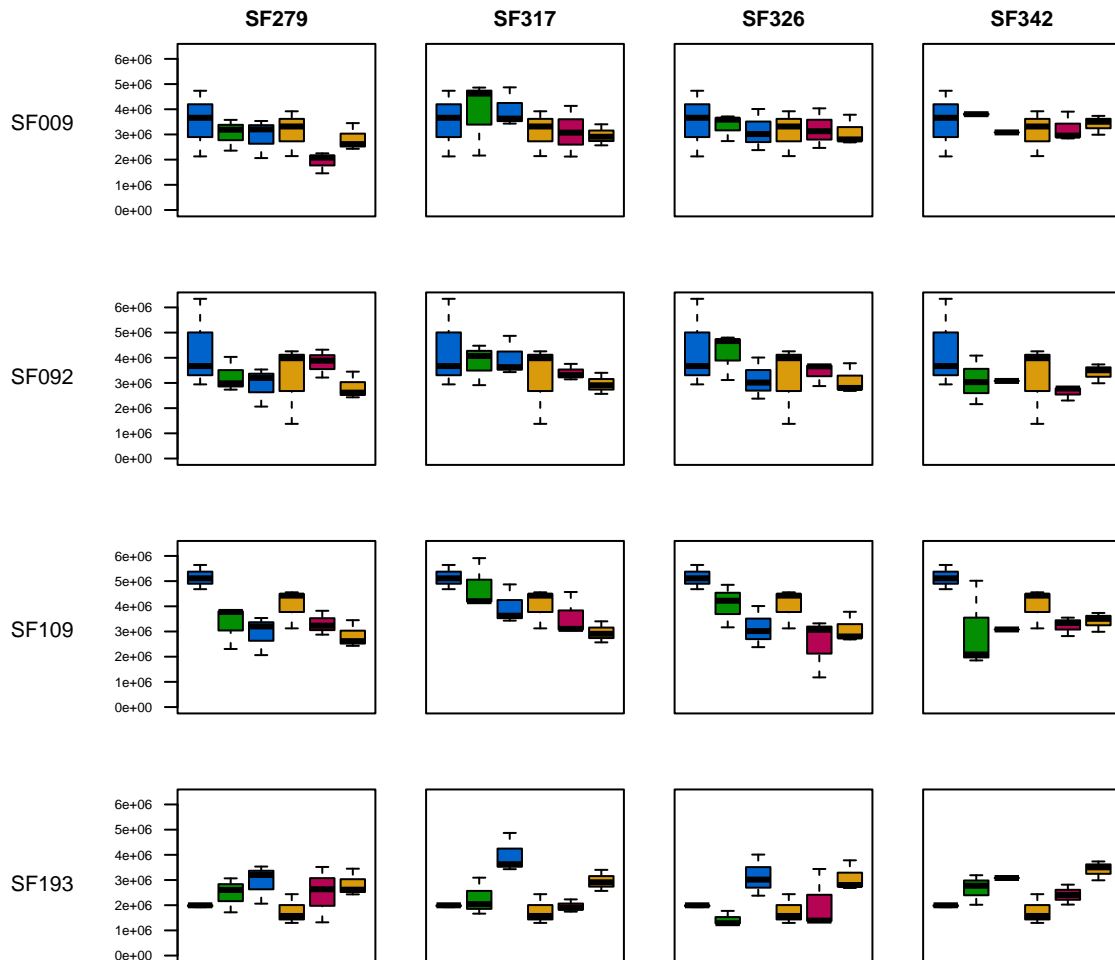

HanXRQChr11g0339031  
Probable photosystem II subunit QA

Parents WW  
Parents WD  
Hybrids WW  
Hybrids WD

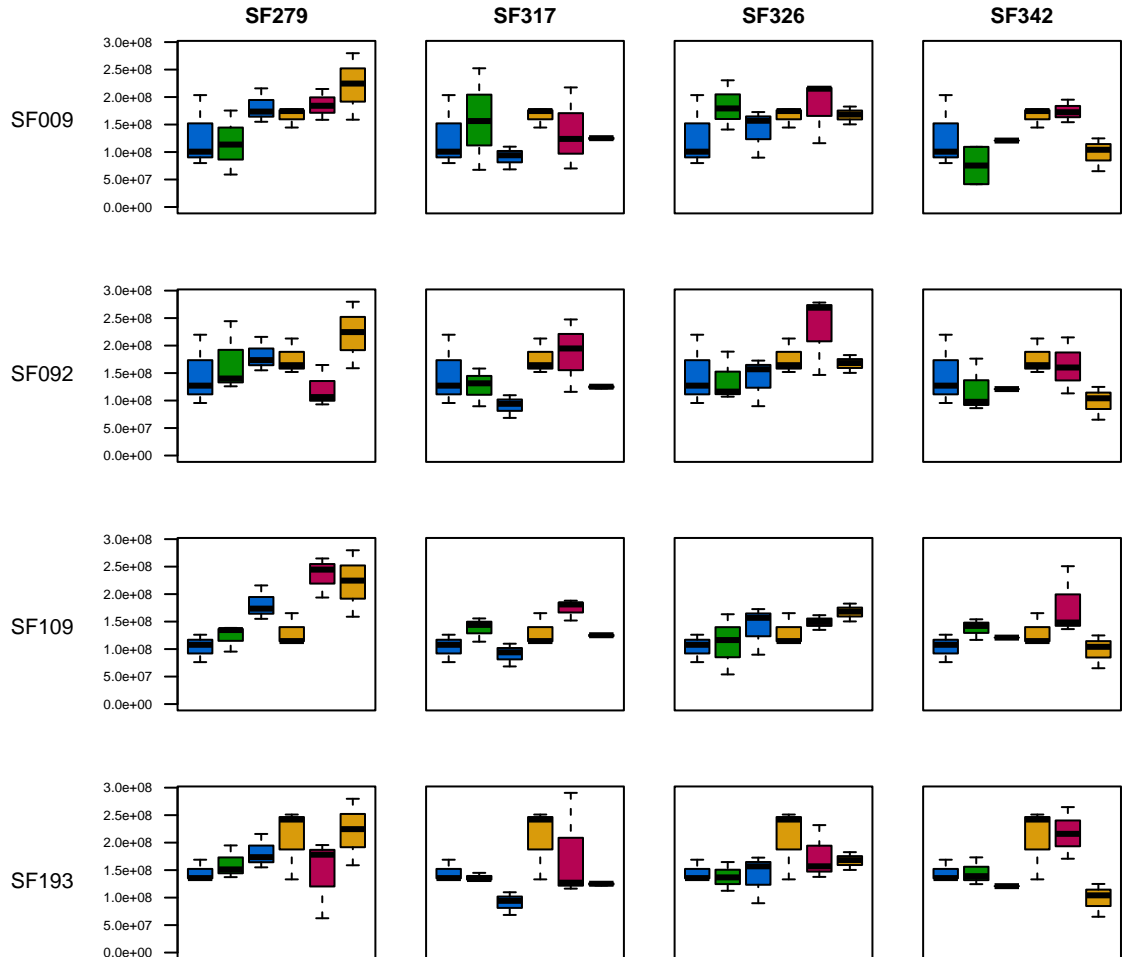

HanXRQChr10g0312801  
Probable ribulose biphosphate  
carboxylase/oxygenase activase 2, chloropl

Parents WW  
Parents WD  
Hybrids WW  
Hybrids WD

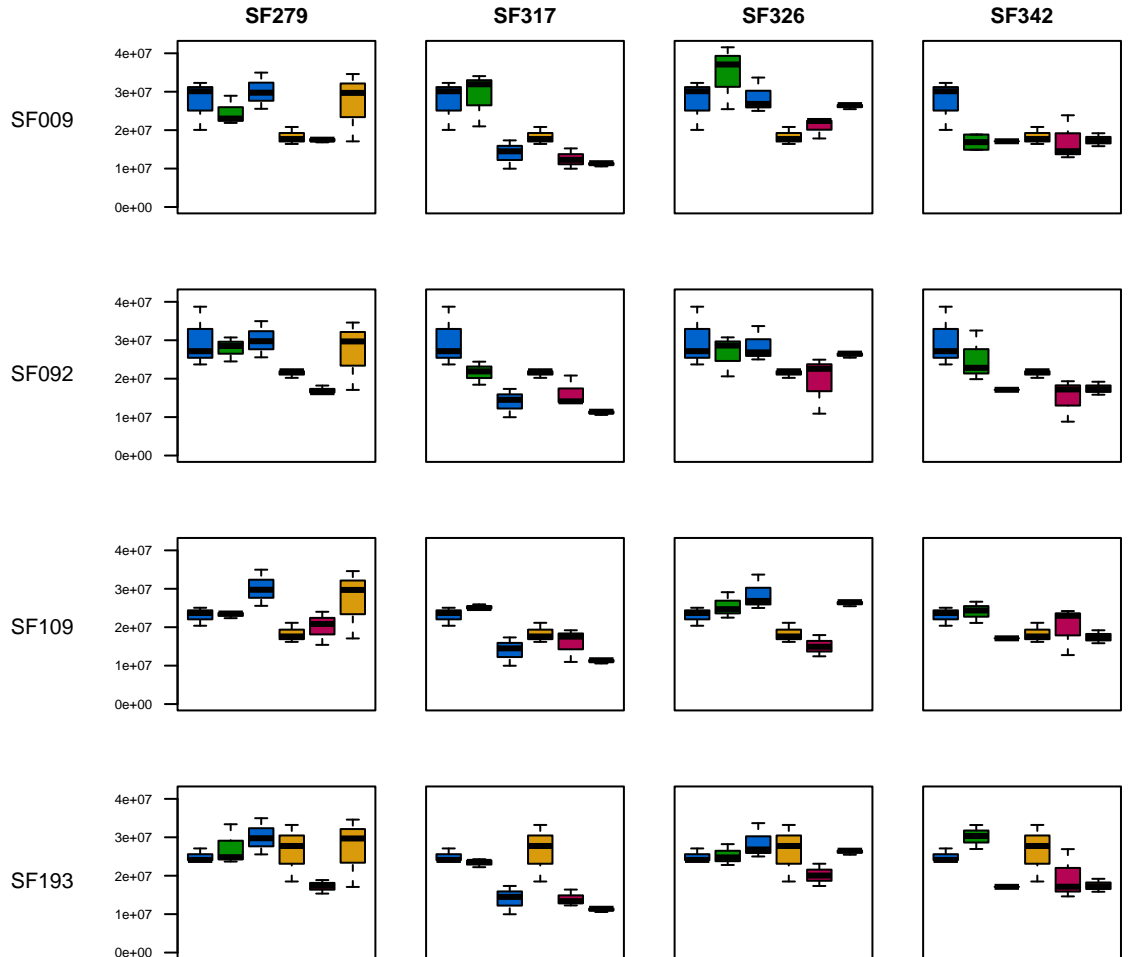

HanXRQChr06g0168271  
Probable FUNCTIONS IN:  
molecular\_function unknown

Parents WW  
Parents WD  
Hybrids WW  
Hybrids WD

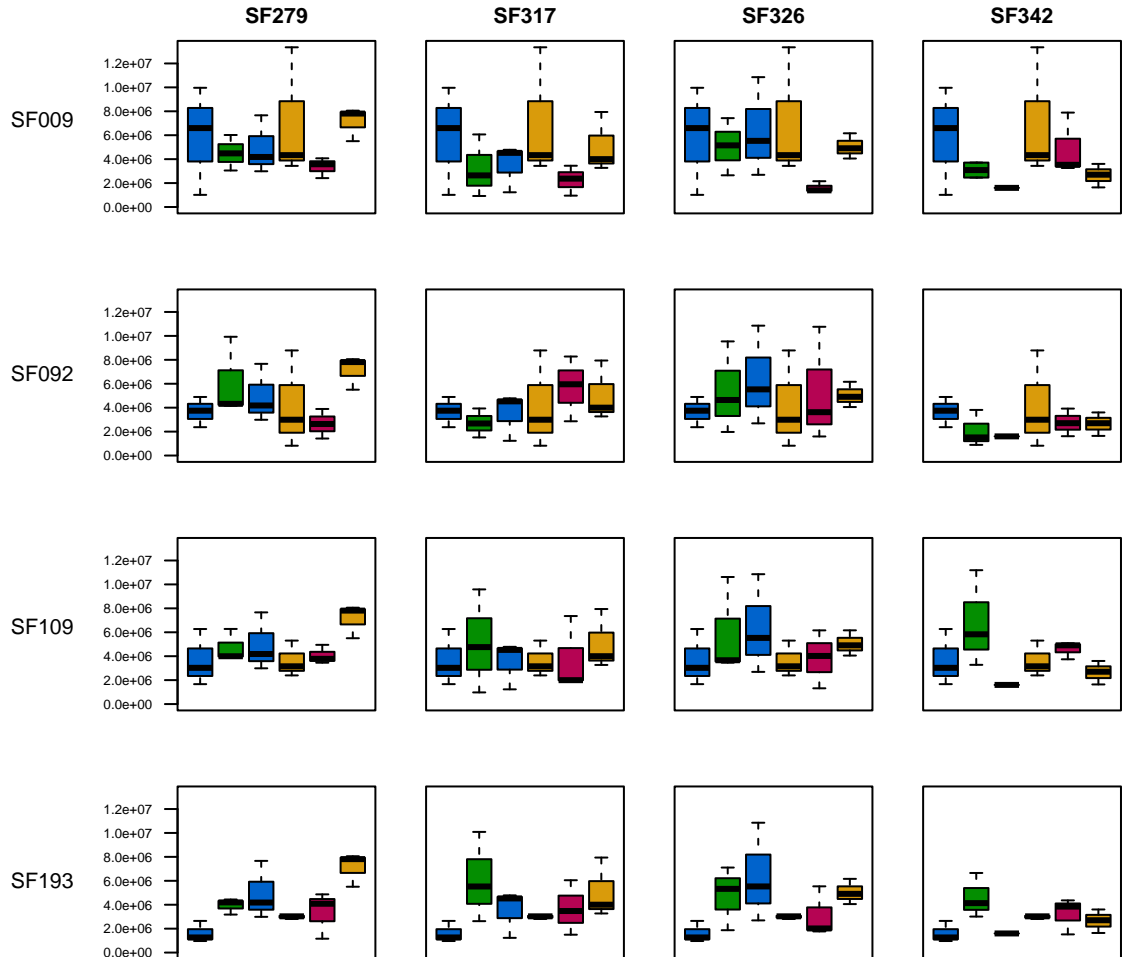

HanXRQChr15g0491551  
Putative pyruvate kinase; Pyruvate  
kinase-like, insert domain

Parents WW  
Parents WD  
Hybrids WW  
Hybrids WD

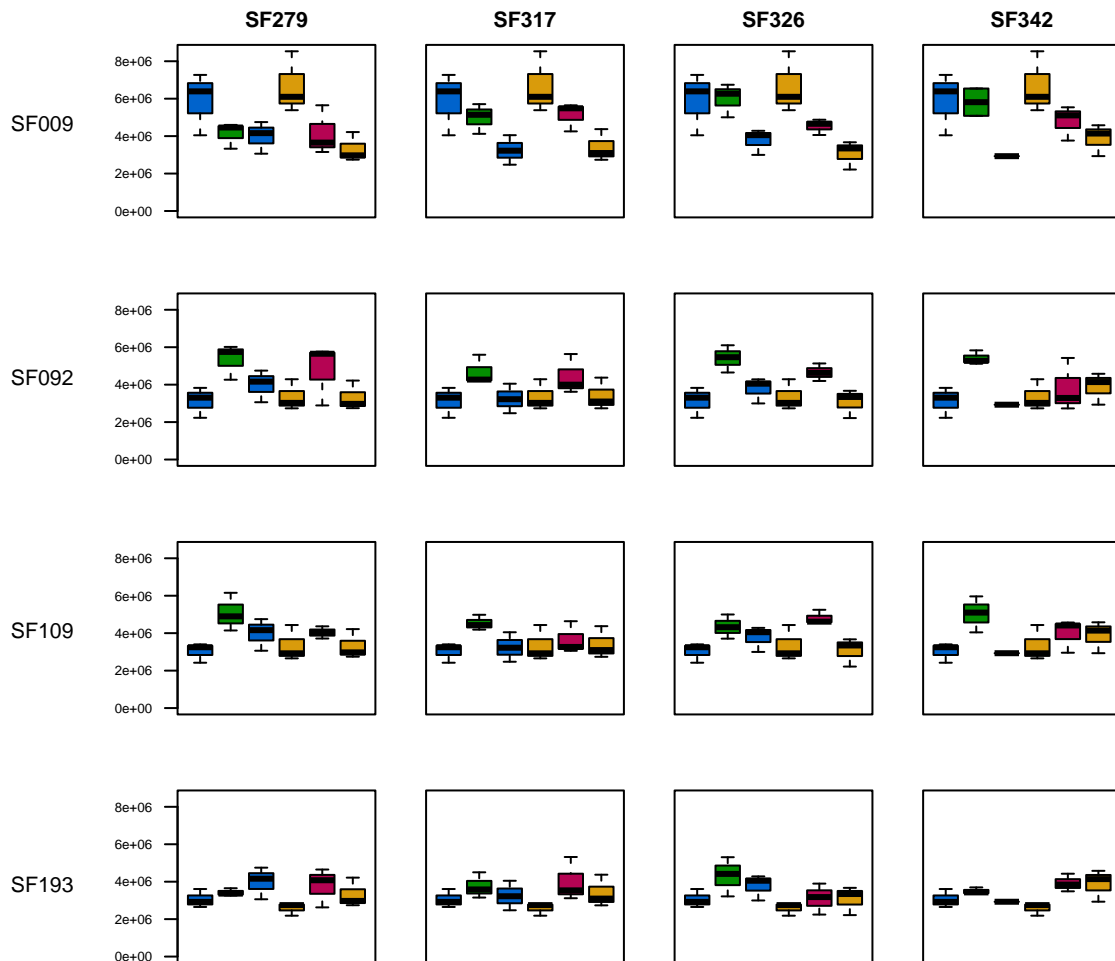

HanXRQChr10g0310361  
Probable alpha/beta-Hydrolases  
superfamily protein

Parents WW  
Parents WD  
Hybrids WW  
Hybrids WD

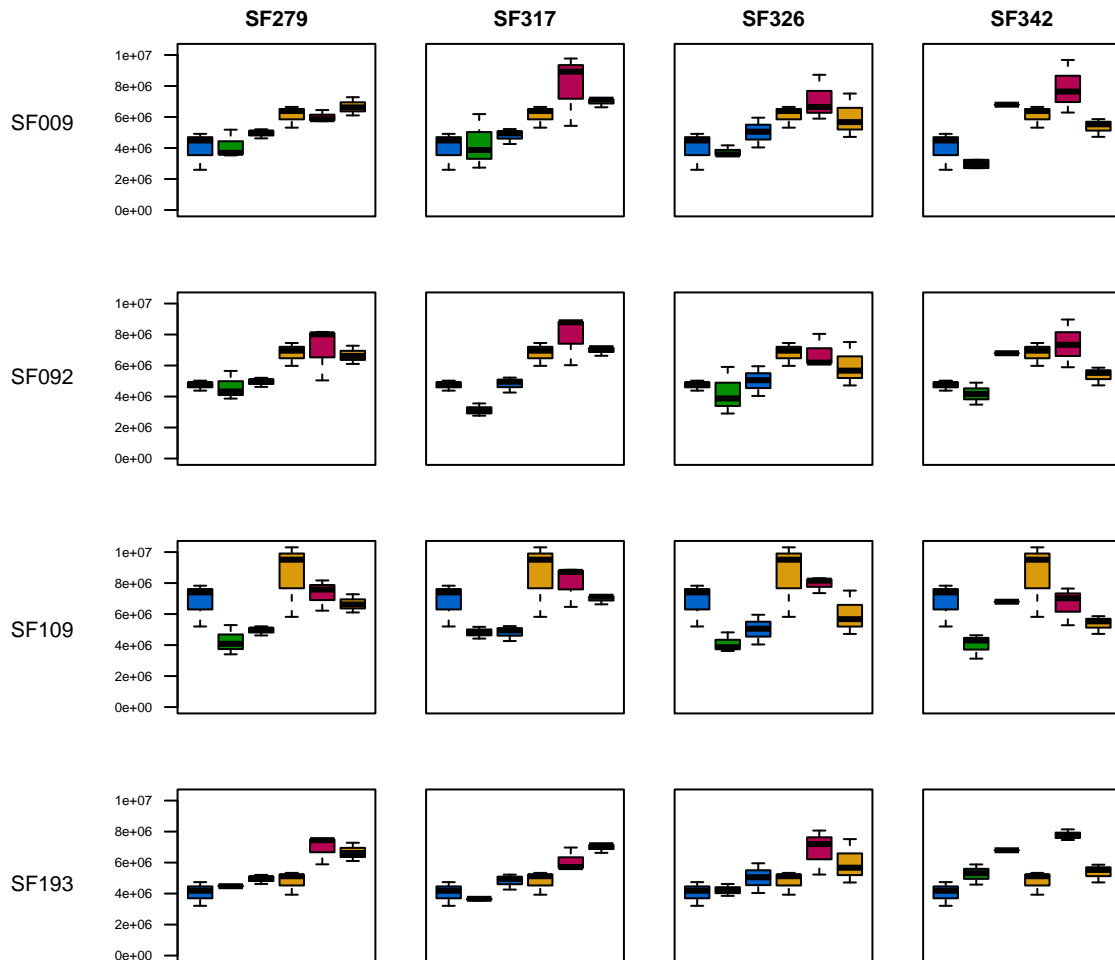

HanXRQChr07g0200701  
Probable 60S ribosomal protein L23a

Parents WW  
Parents WD  
Hybrids WW  
Hybrids WD

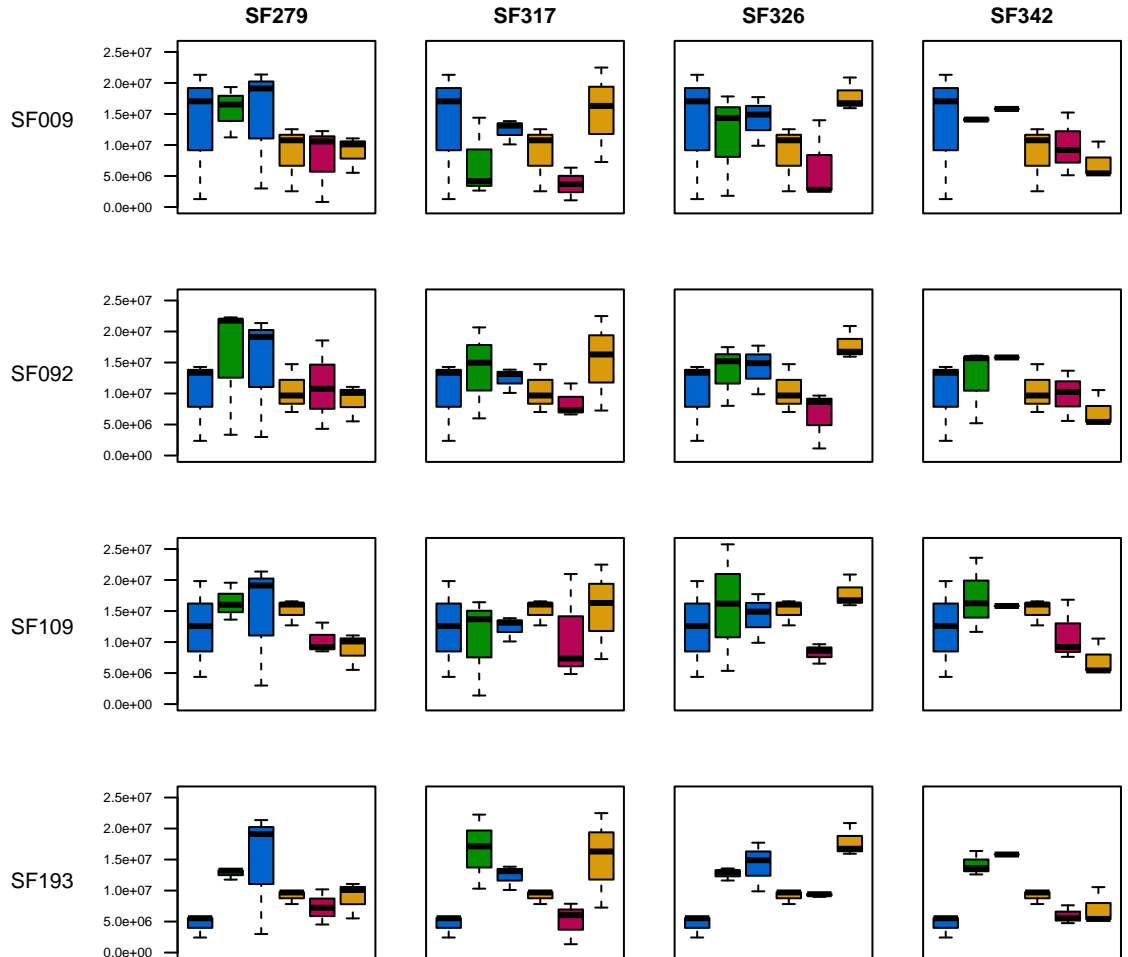

HanXRQChr04g0095031  
Probable isopentenyl-diphosphate  
Delta-isomerase II

Parents WW  
Parents WD  
Hybrids WW  
Hybrids WD

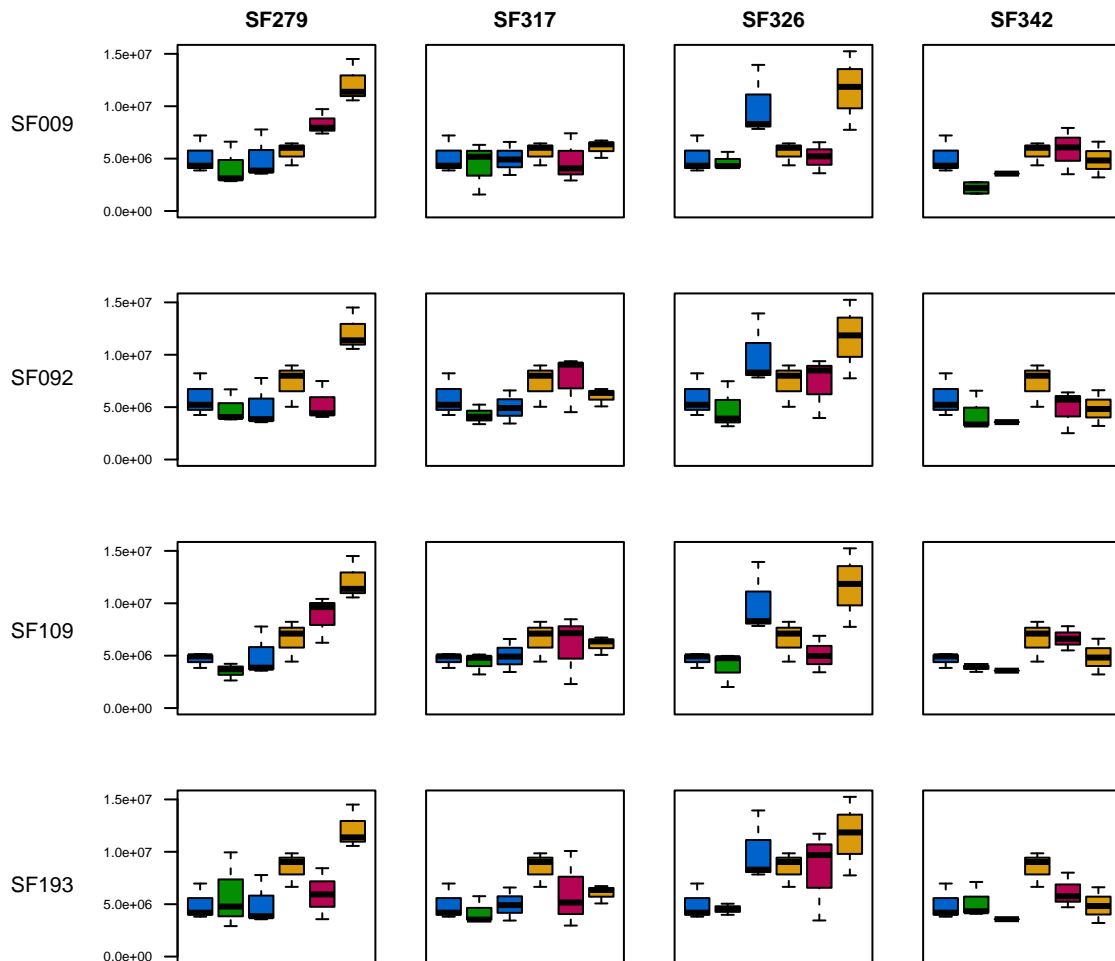



HanXRQChr09g0265471  
 Putative aldose 1-/Glucose-6-phosphate  
 1-epimerase; Galactose mutarotase-like d

Parents WW  
 Parents WD  
 Hybrids WW  
 Hybrids WD

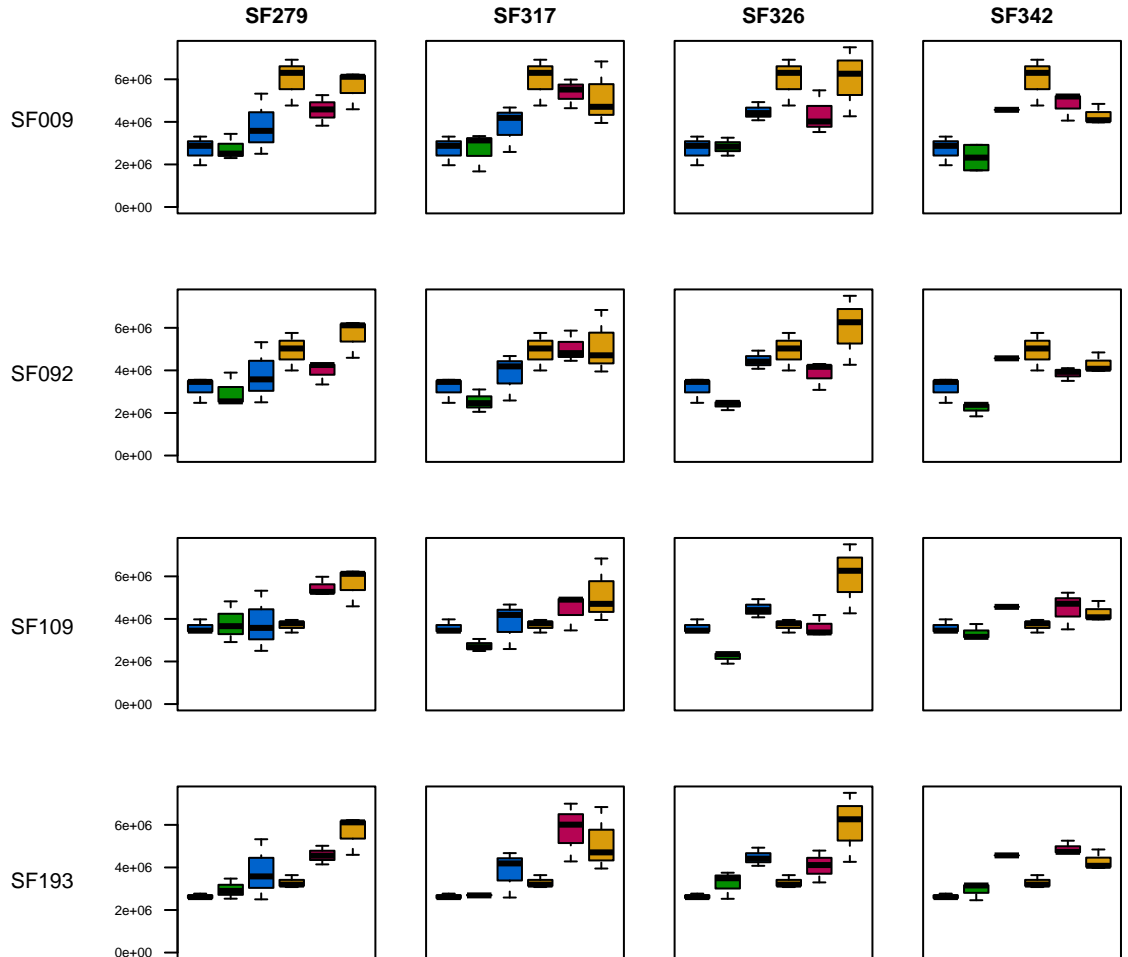

HanXRQChr15g0490761  
Uncharacterized conserved protein

- Parents WW
- Parents WD
- Hybrids WW
- Hybrids WD

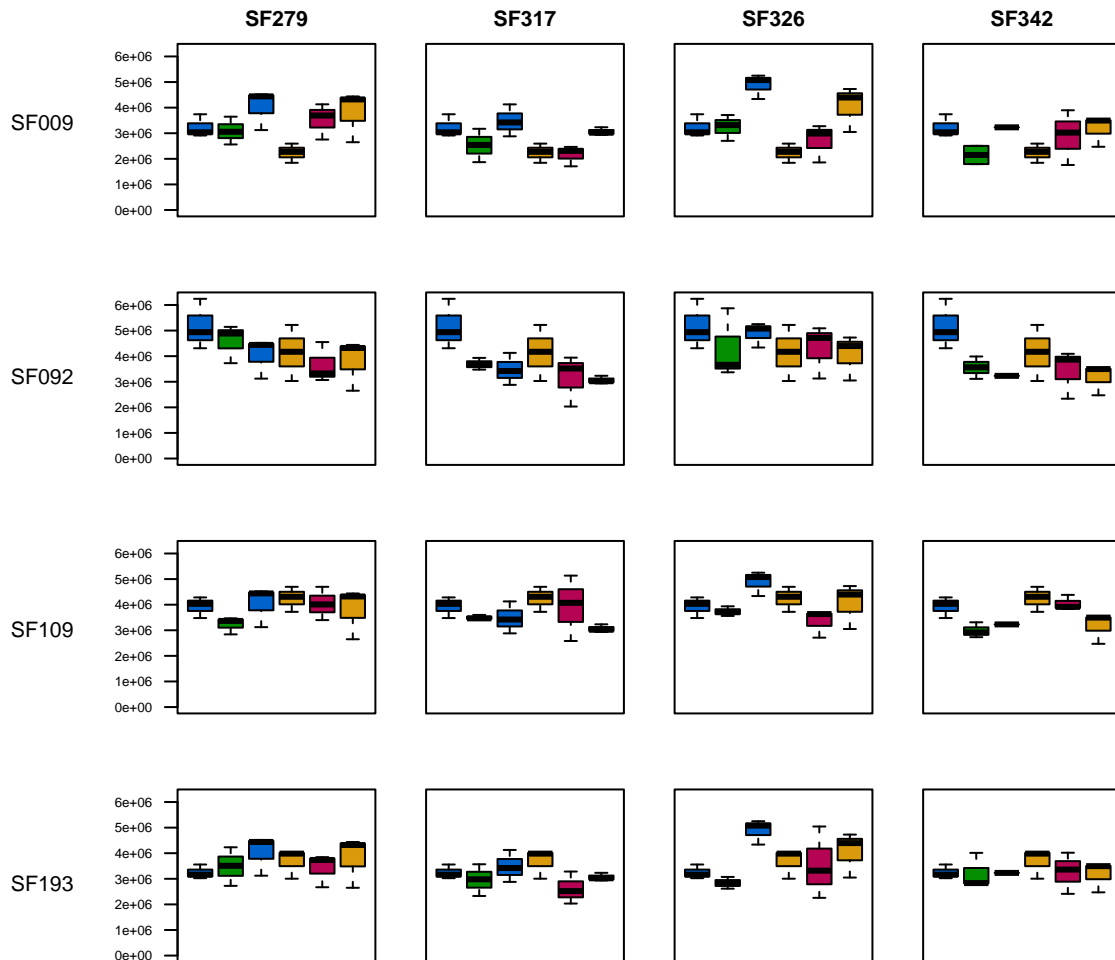

HanXRQChr10g0283451  
Probable glucan  
endo-1,3-beta-glucosidase, acidic isoform

Parents WW  
Parents WD  
Hybrids WW  
Hybrids WD

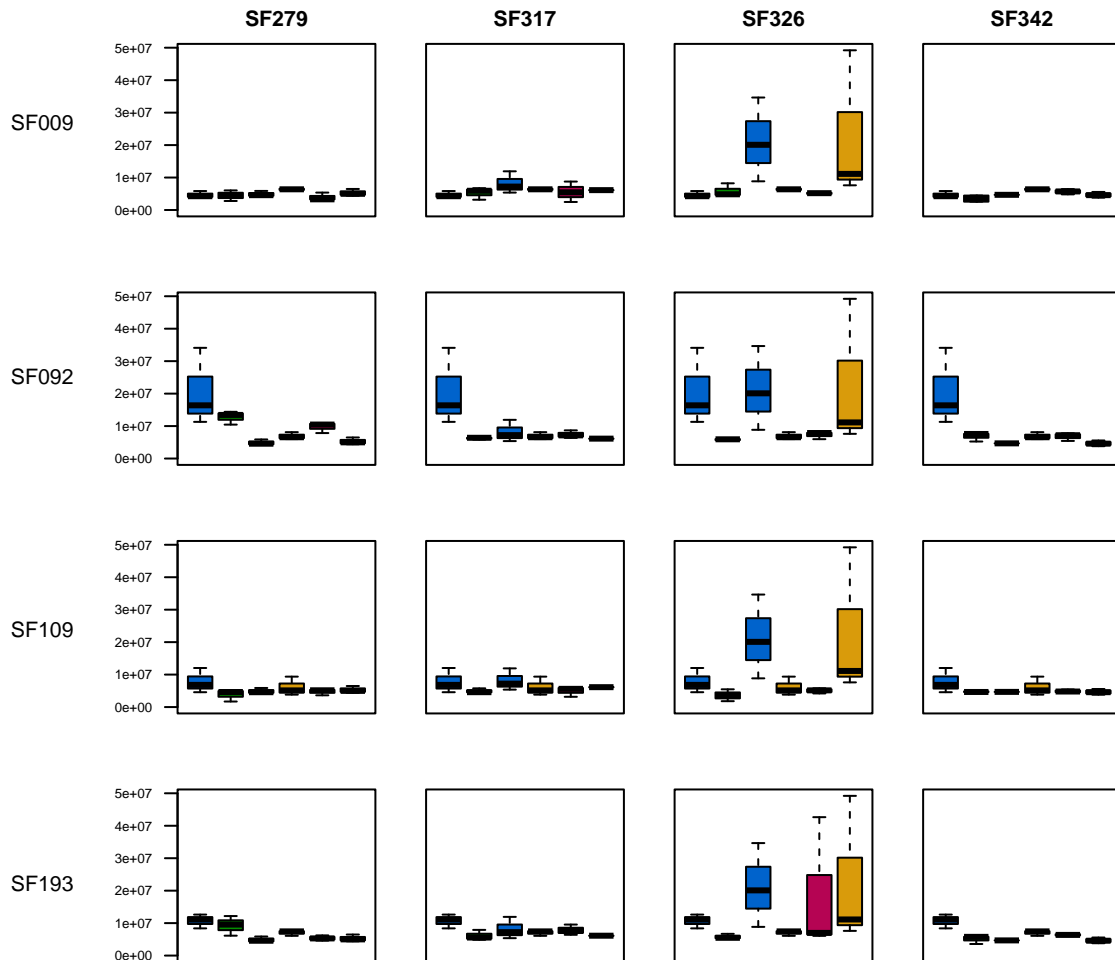

HanXRQChr13g0387091  
Probable chaperone protein htpG family  
protein

Parents WW  
Parents WD  
Hybrids WW  
Hybrids WD

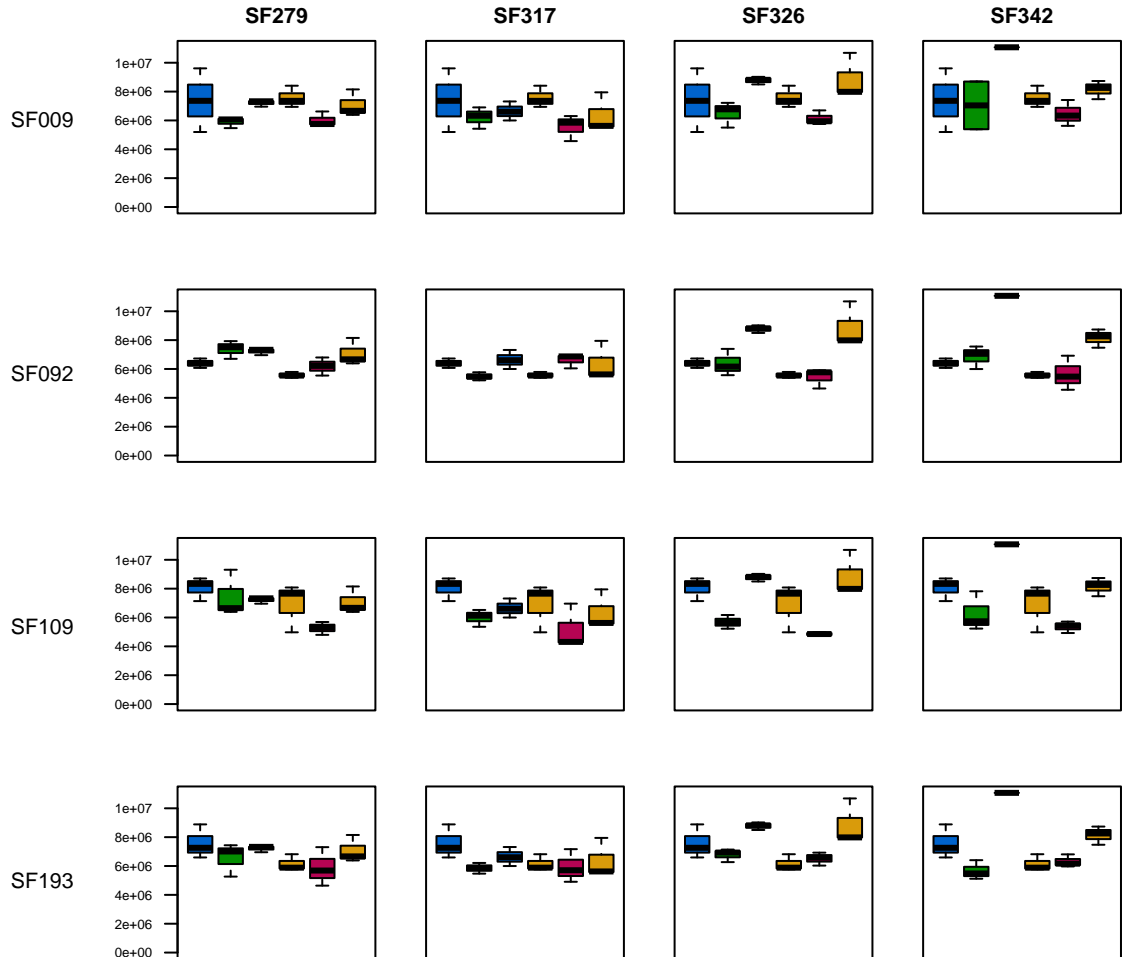

HanXRQChr06g0175391  
 Probable xyloglucan  
 endotransglucosylase/hydrolase 1

Parents WW  
 Parents WD  
 Hybrids WW  
 Hybrids WD

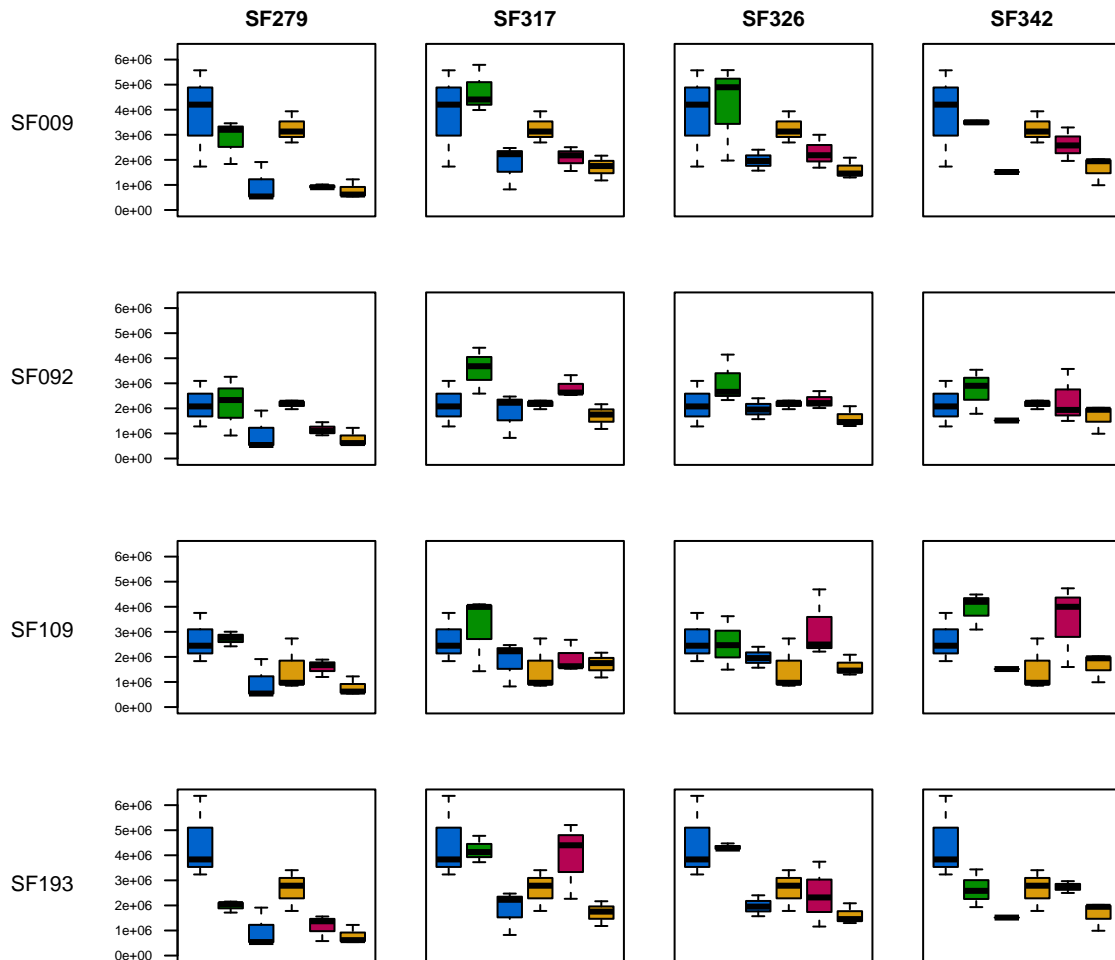

HanXRQChr14g0462341  
Probable HXXXD-type acyl-transferase  
family protein

Parents WW  
Parents WD  
Hybrids WW  
Hybrids WD

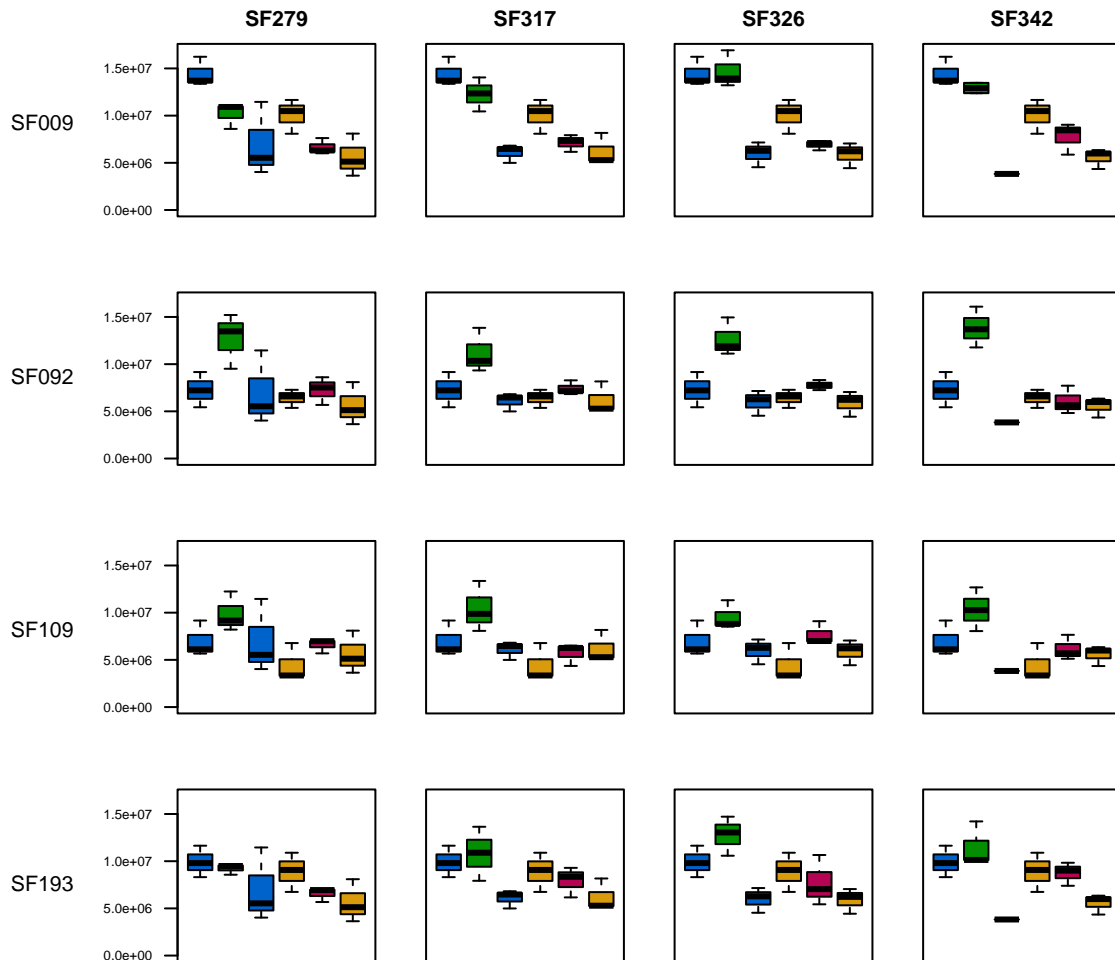

HanXRQChr10g0311011  
Probable aluminium induced protein with  
YGL and LRDR motifs

Parents WW  
Parents WD  
Hybrids WW  
Hybrids WD

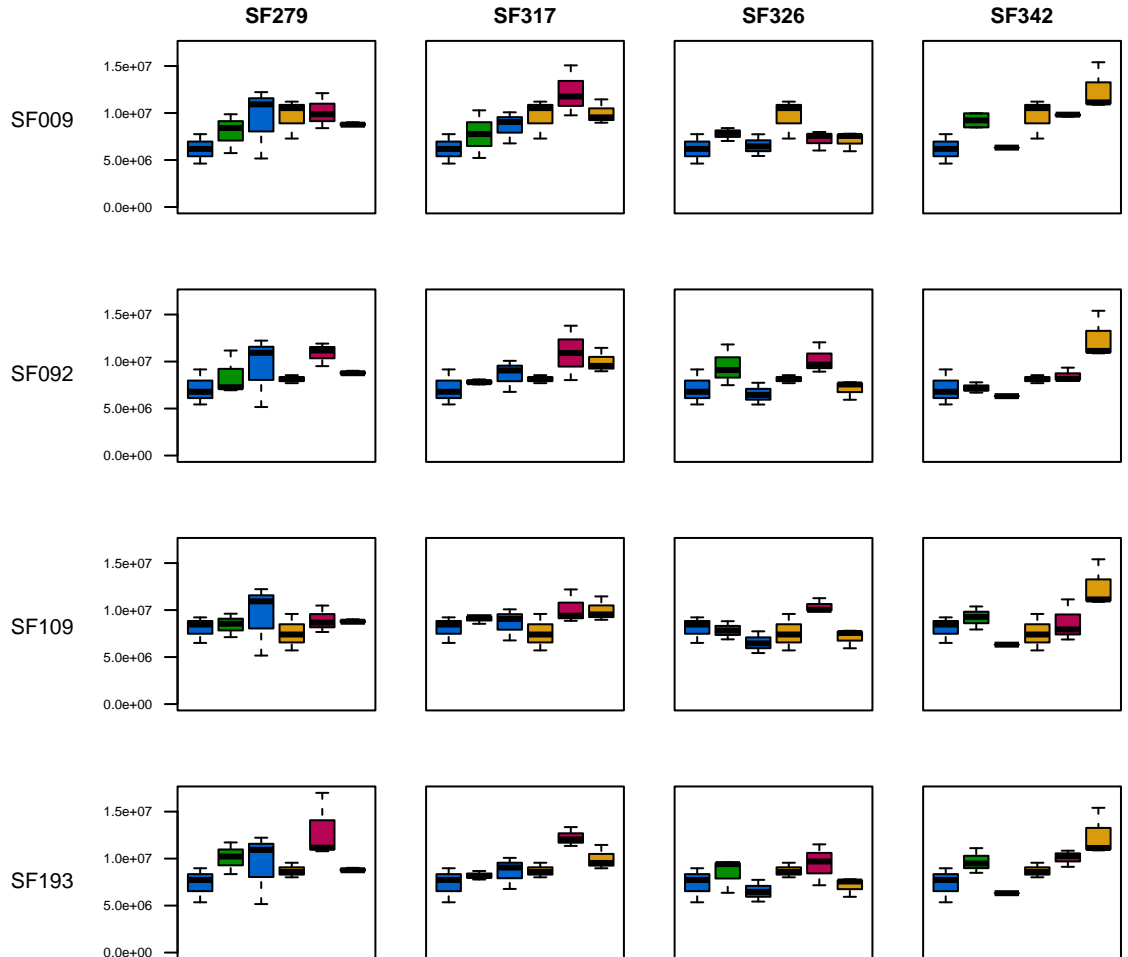

HanXRQChr04g0096441  
Putative P-loop containing nucleoside  
triphosphate hydrolase

Parents WW  
Parents WD  
Hybrids WW  
Hybrids WD

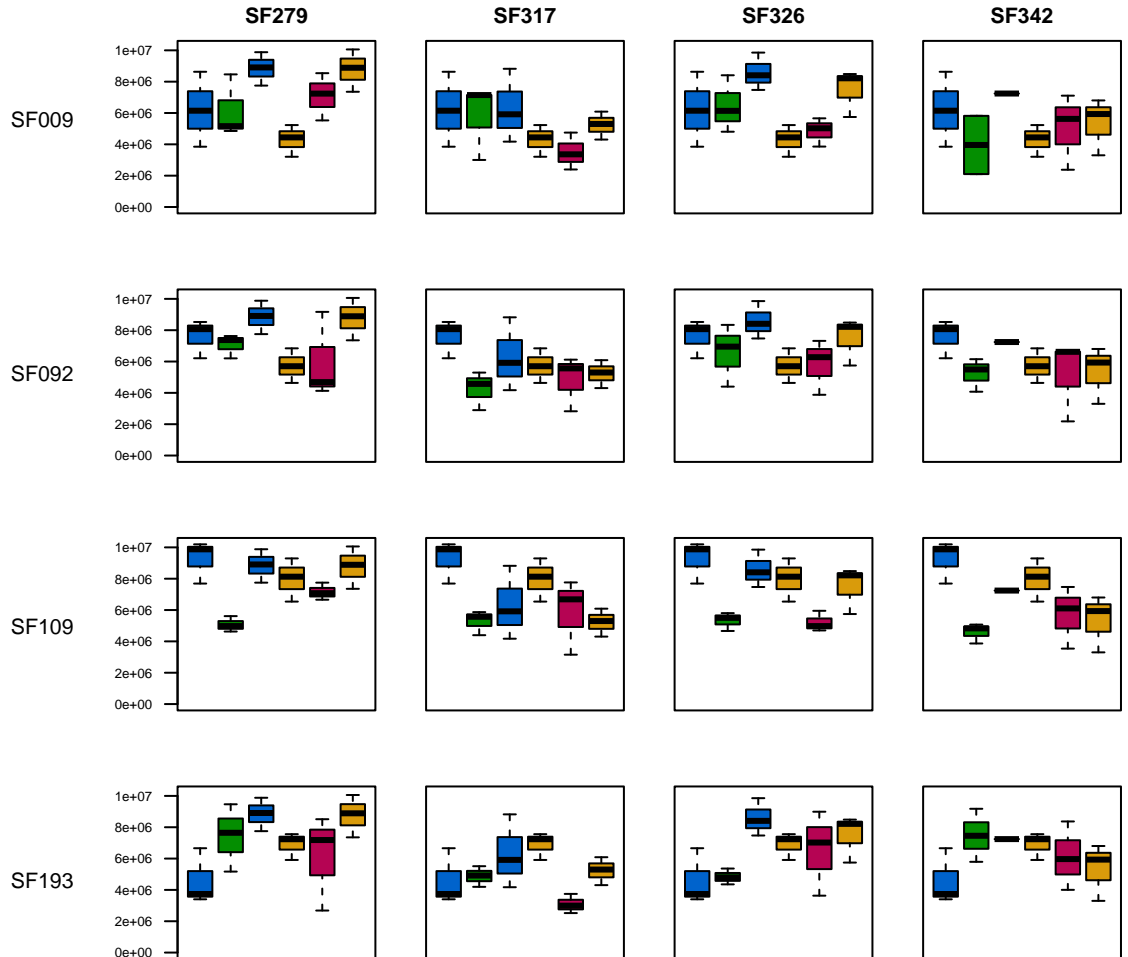



HanXRQChr15g0469281  
Probable protein disulfide-isomerase

- Parents WW
- Parents WD
- Hybrids WW
- Hybrids WD

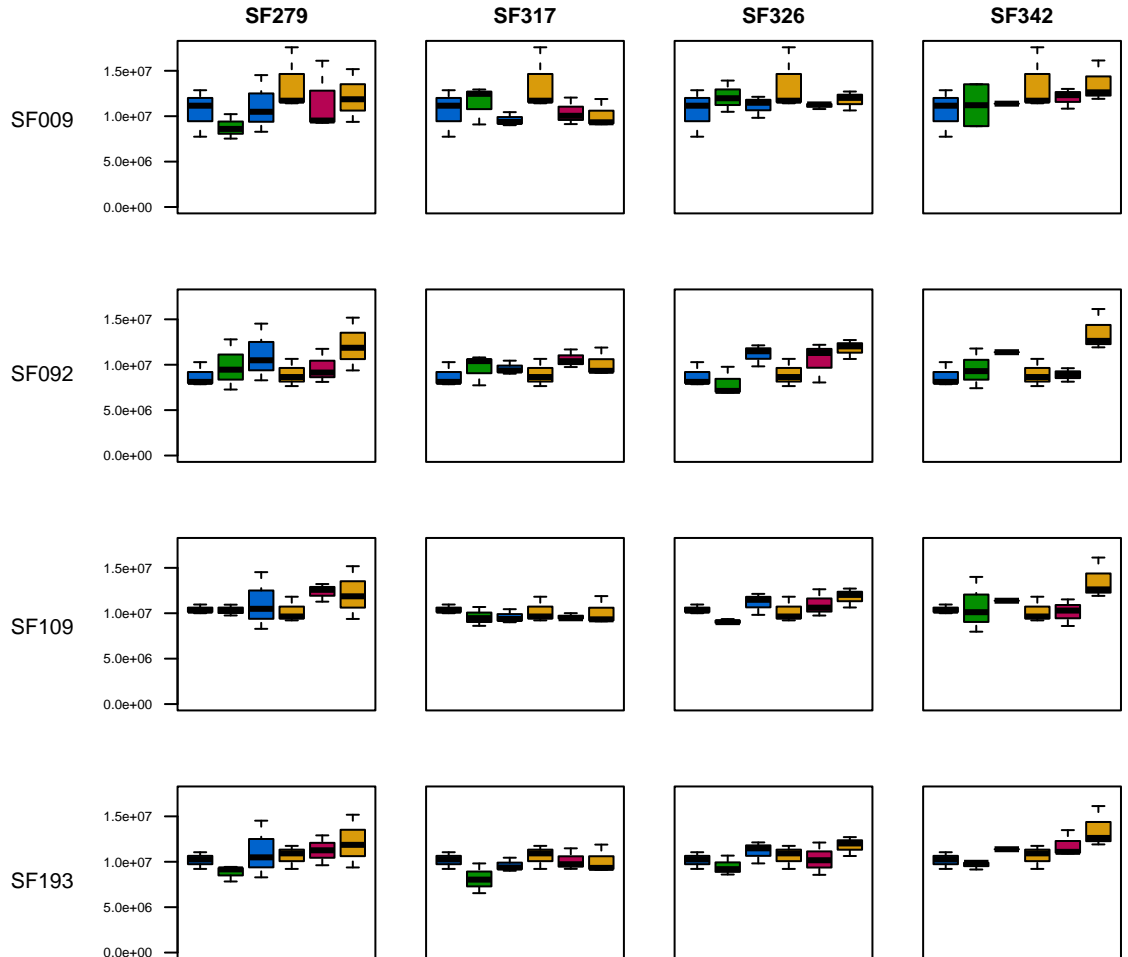

HanXRQChr02g0045291  
Probable aldehyde dehydrogenase 12A1

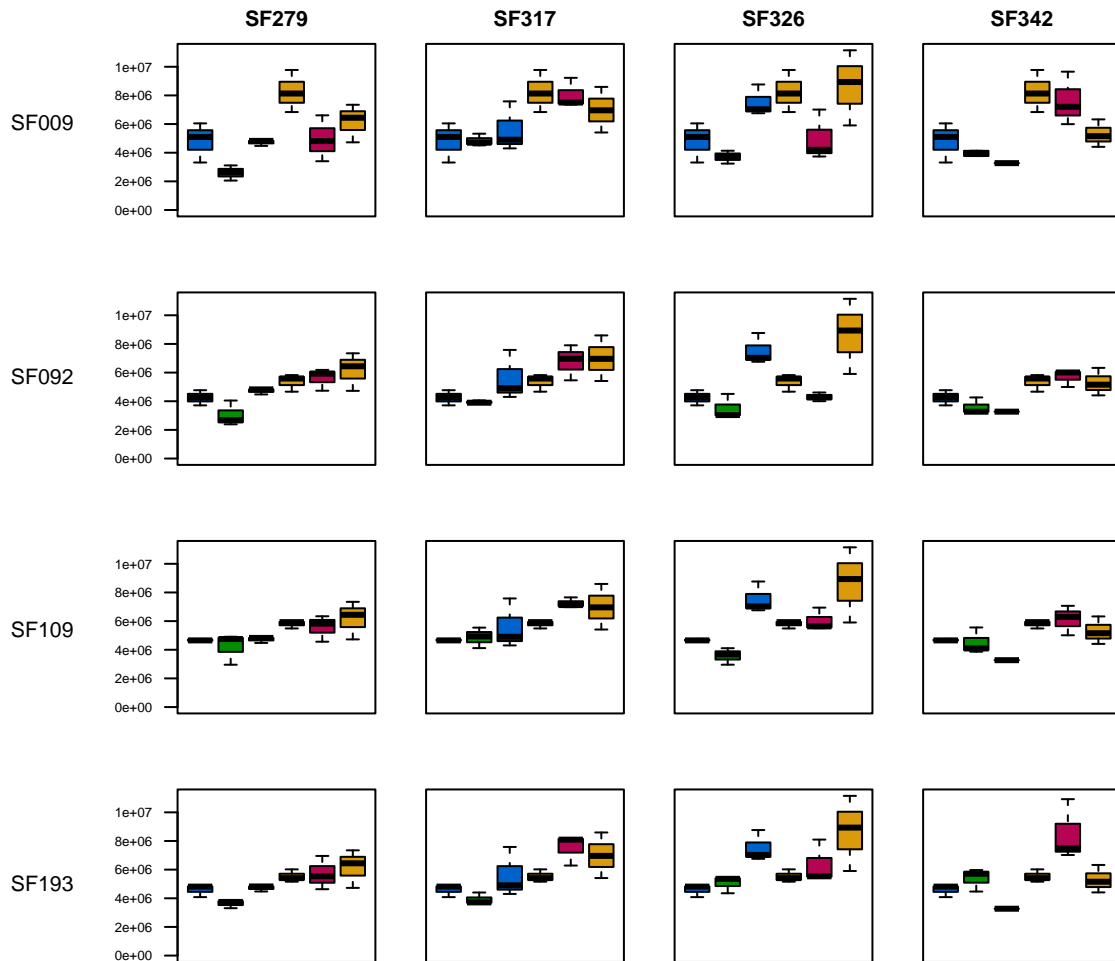

HanXRQChr17g0544251  
Probable L-ascorbate peroxidase 4

- Parents WW
- Parents WD
- Hybrids WW
- Hybrids WD

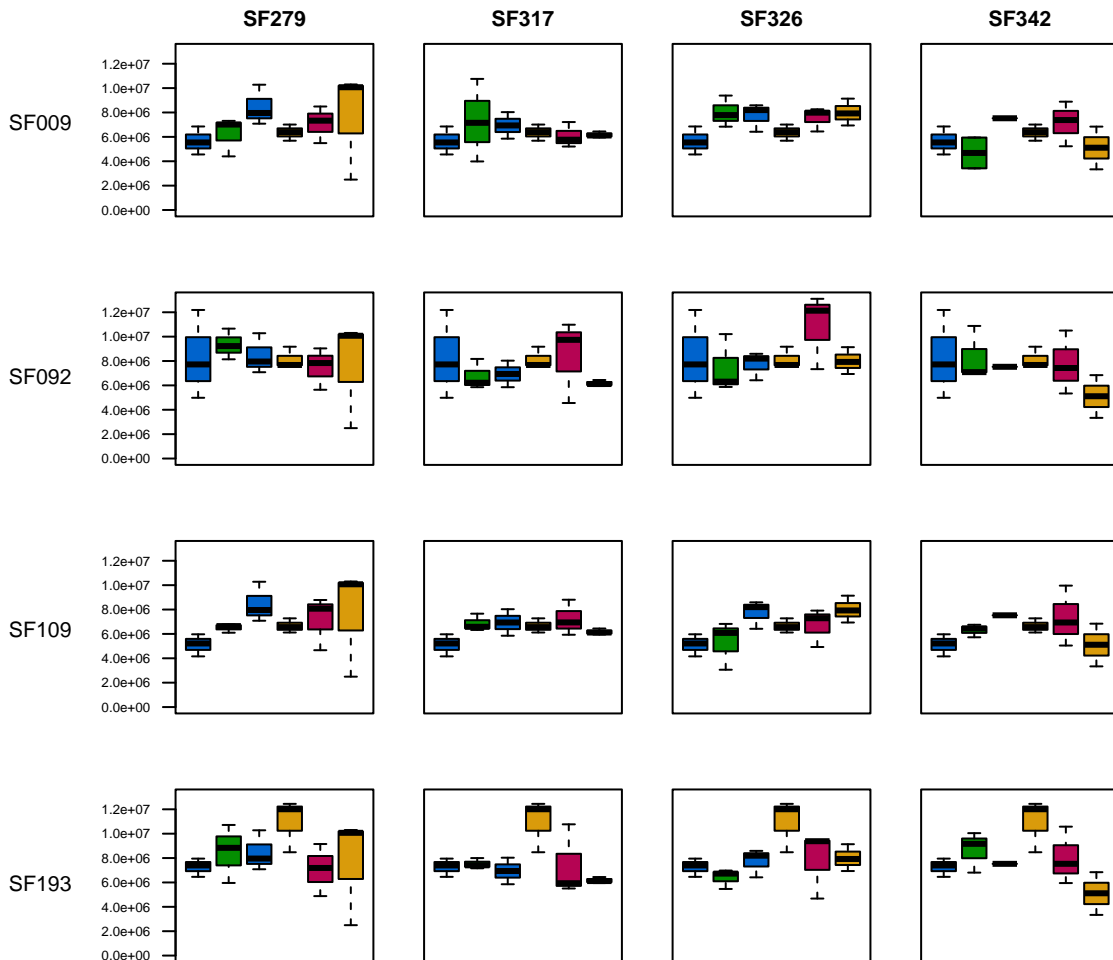

HanXRQChr01g0007121  
Probable pyridoxal 5'-phosphate  
synthase subunit PDX1

Parents WW  
Parents WD  
Hybrids WW  
Hybrids WD

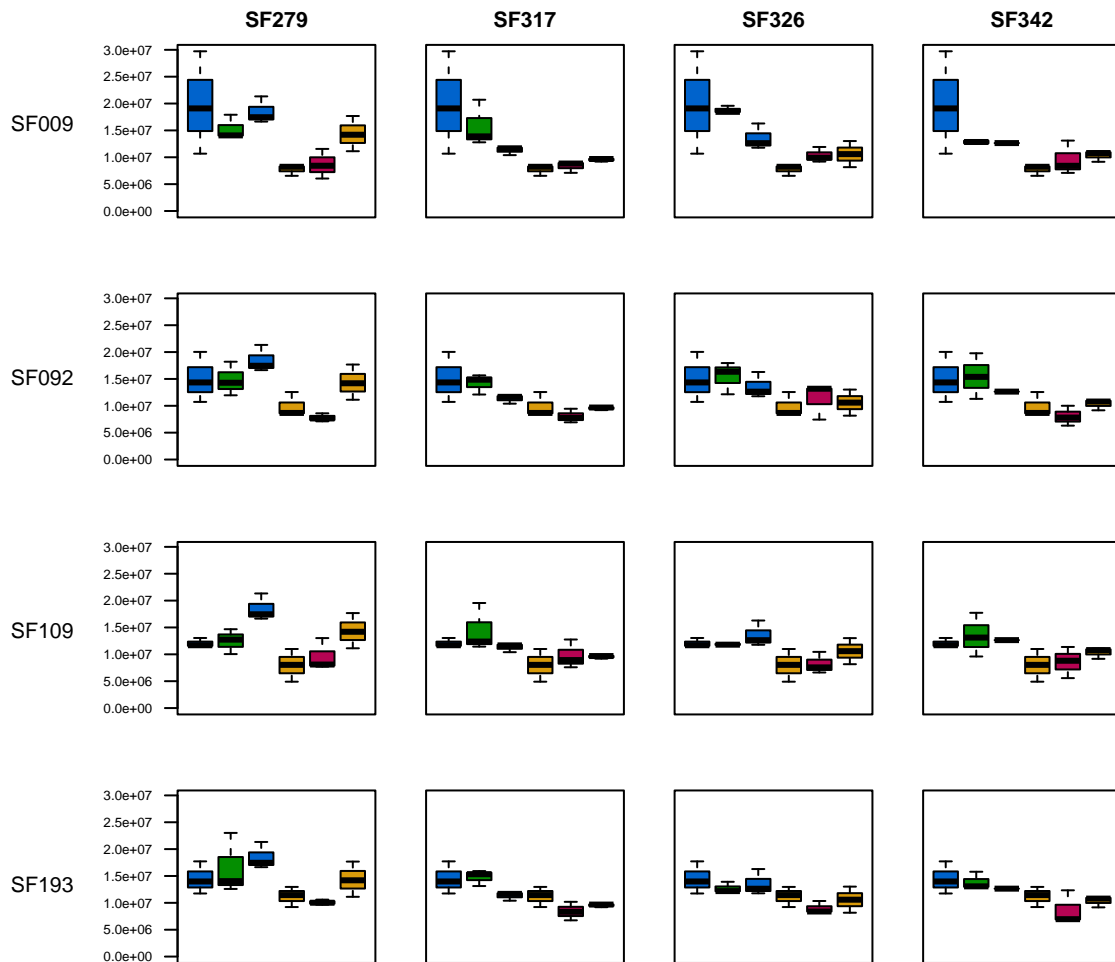

HanXRQChr04g0099261  
Probable oxygen-evolving enhancer  
protein 2, chloroplastic

Parents WW  
Parents WD  
Hybrids WW  
Hybrids WD

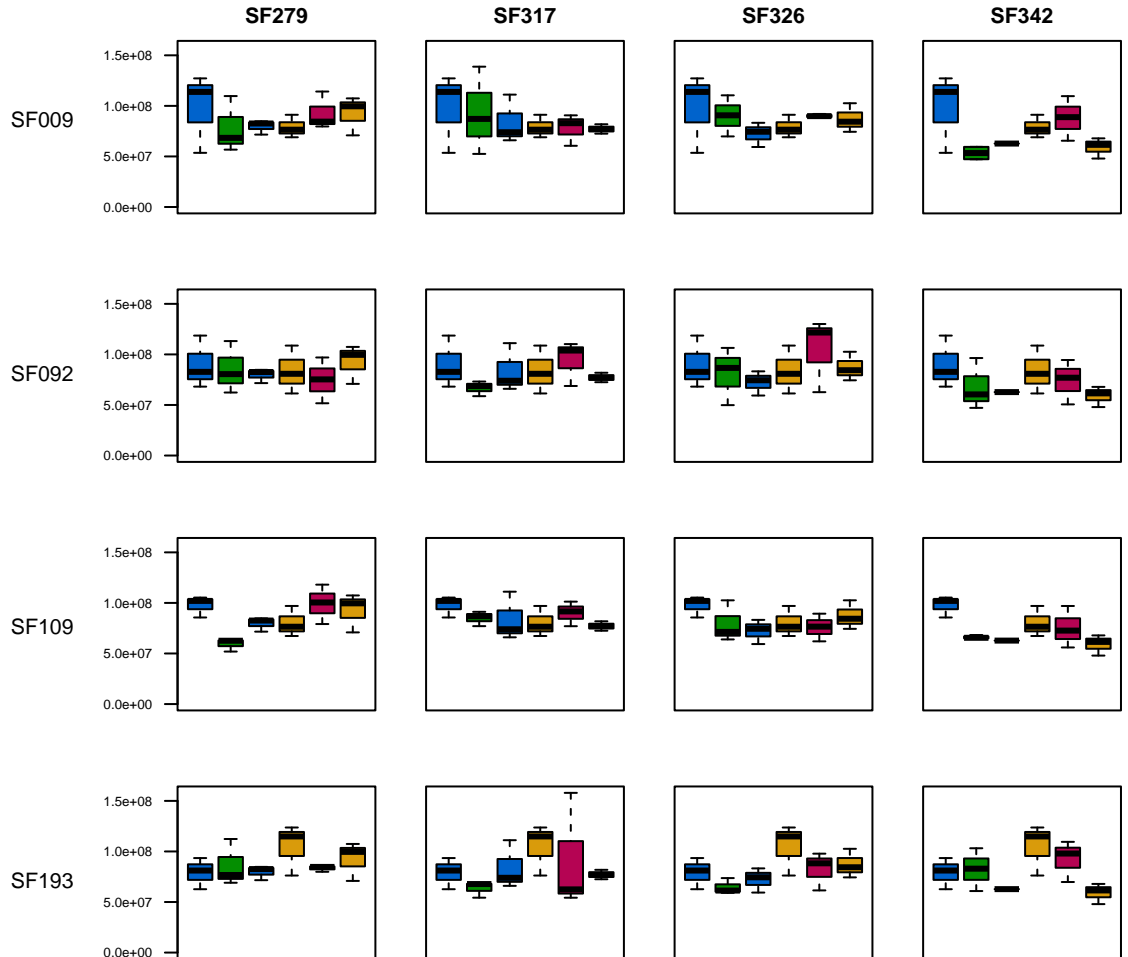

HanXRQChr13g0401491  
Probable elongation factor 1-beta

- Parents WW
- Parents WD
- Hybrids WW
- Hybrids WD

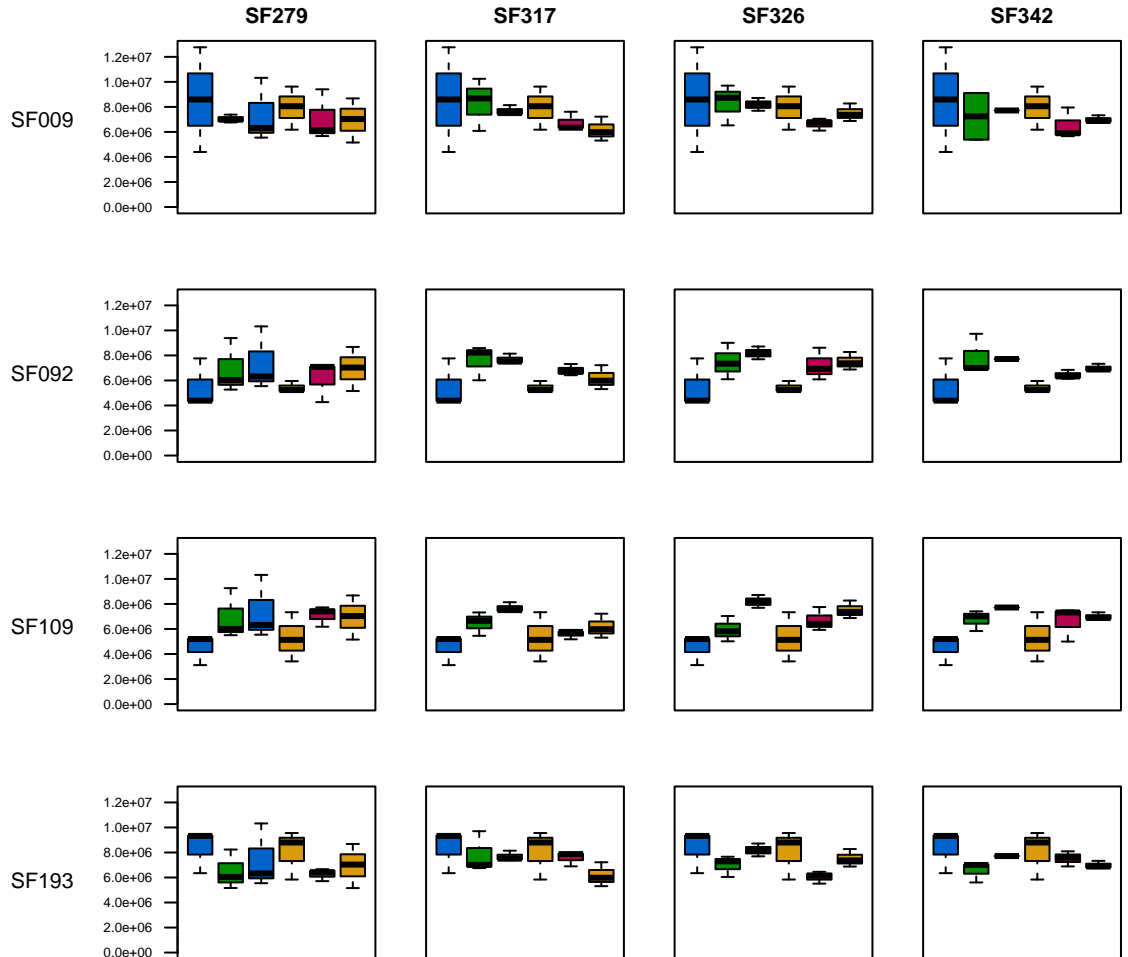

HanXRQChr08g0216441  
Probable catalase

Parents WW  
Parents WD  
Hybrids WW  
Hybrids WD

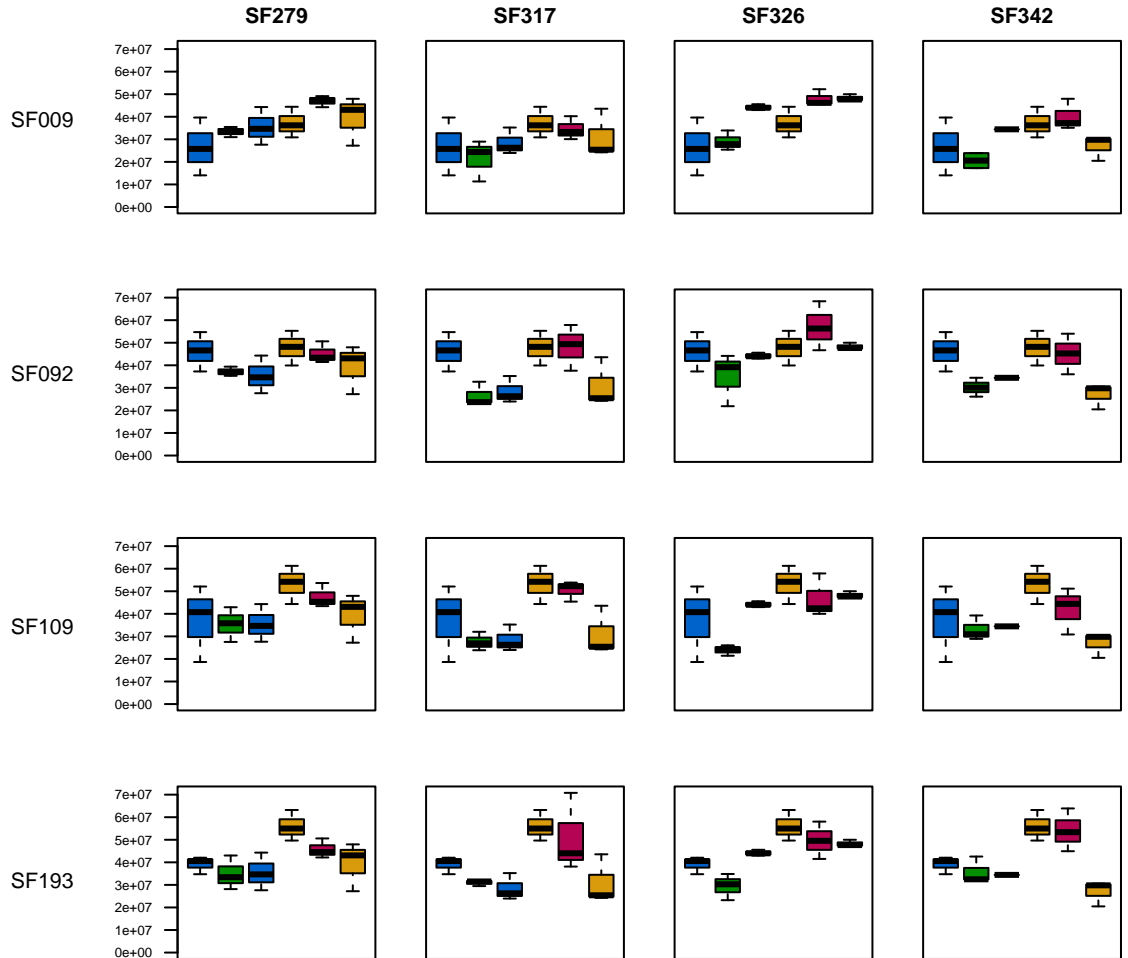

HanXRQChr05g0156121  
 Probable haloacid dehalogenase-like  
 hydrolase (HAD) superfamily protein

Parents WW  
 Parents WD  
 Hybrids WW  
 Hybrids WD

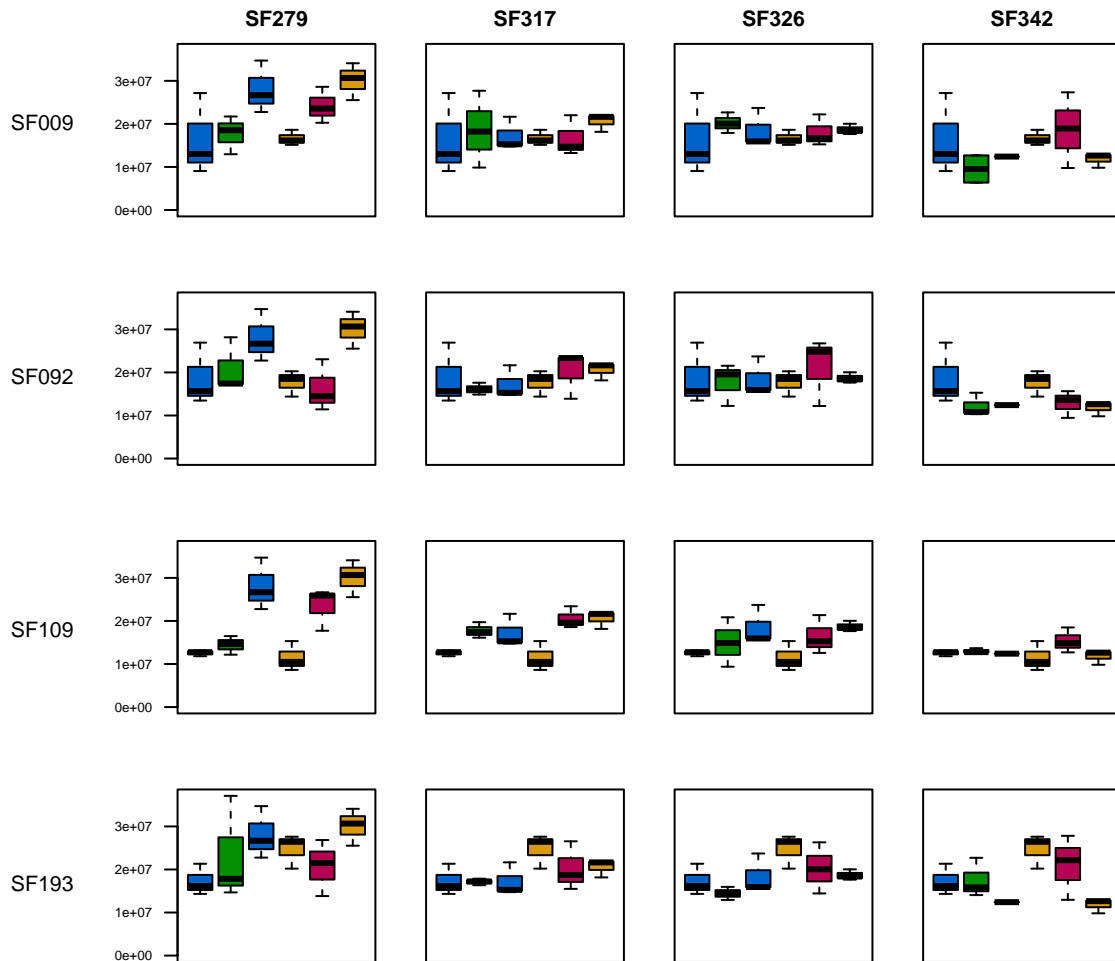



HanXRQChr02g0056771  
Probable lipoxygenase 7, chloroplastic

Parents WW  
Parents WD  
Hybrids WW  
Hybrids WD

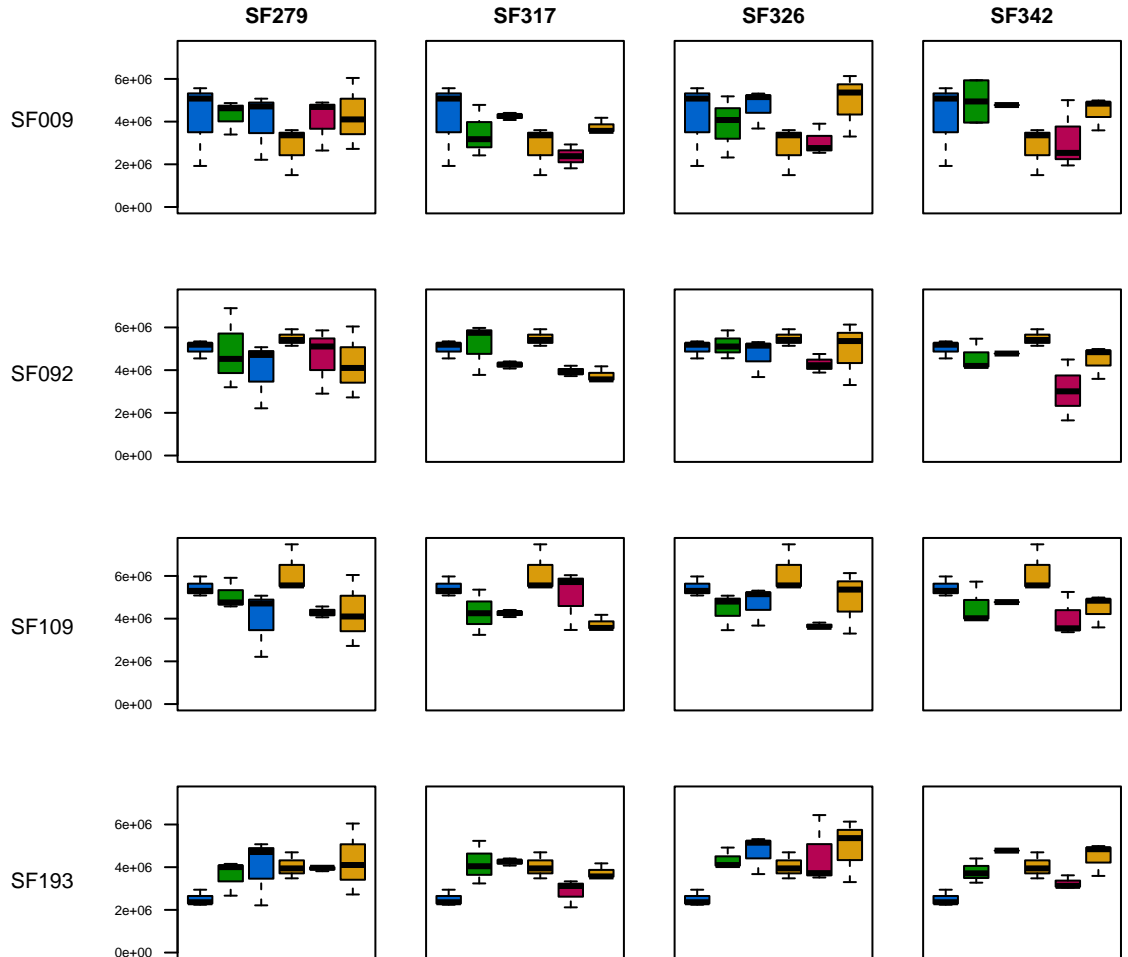

HanXRQChr09g0276101  
Putative acid phosphatase, class  
B-like; HAD-like domain

Parents WW  
Parents WD  
Hybrids WW  
Hybrids WD

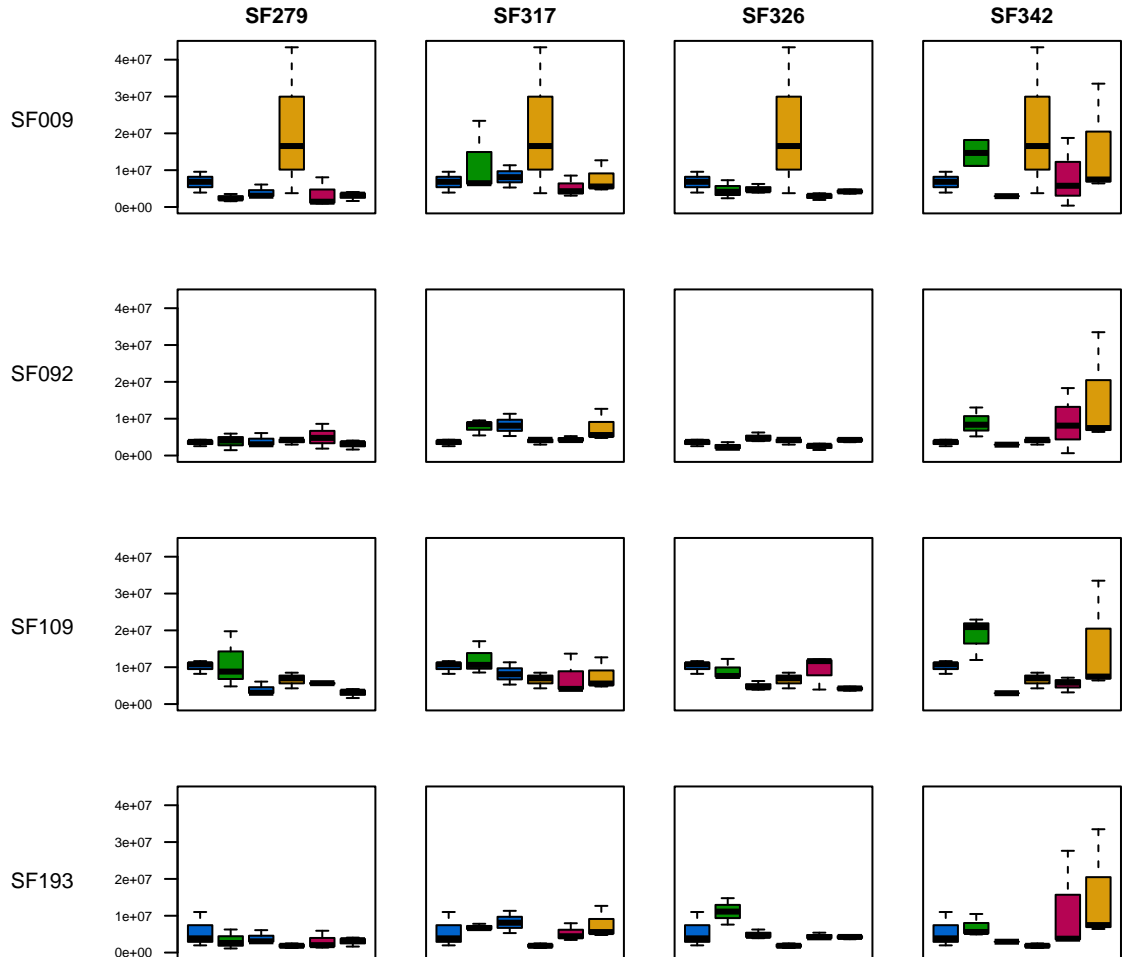

HanXRQChr03g0071741  
Putative ankyrin repeat-containing  
domain

Parents WW  
Parents WD  
Hybrids WW  
Hybrids WD

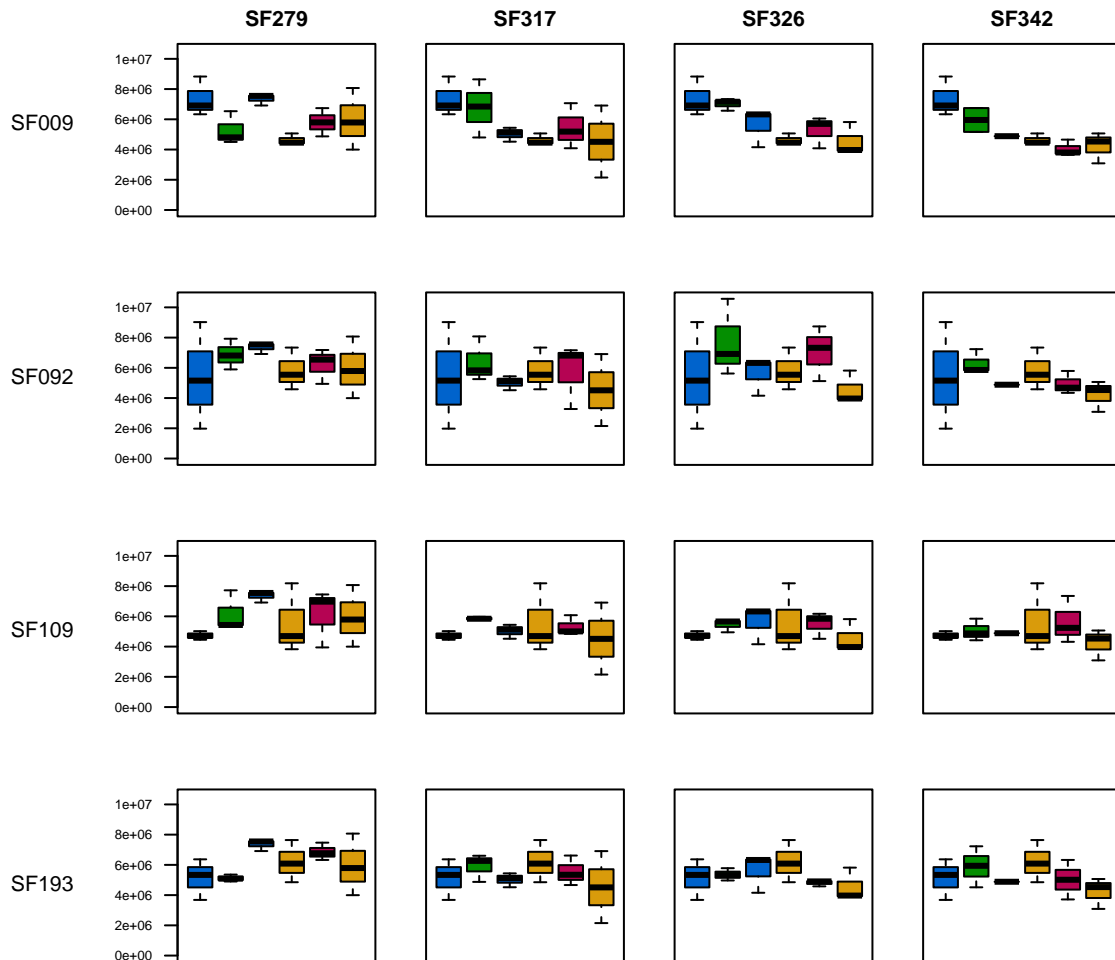

HanXRQChr08g0227831  
 Putative histone H2A; Histone-fold;  
 Histone H2A, C-terminal domain; Histone H

Parents WW  
 Parents WD  
 Hybrids WW  
 Hybrids WD

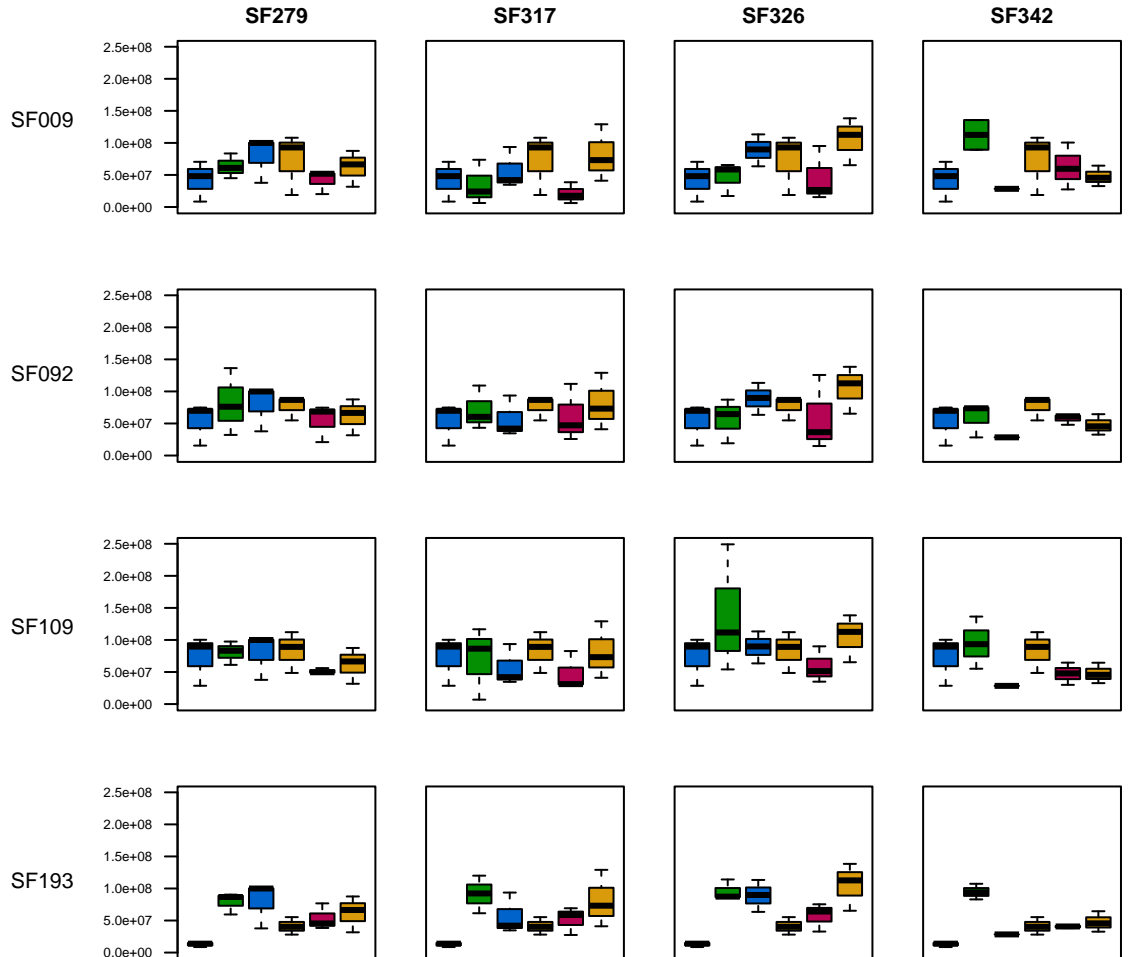

HanXRQChr01g0012131  
Probable  
catalytics;transferases;[acyl-carrier-protein

Parents WW  
Parents WD  
Hybrids WW  
Hybrids WD

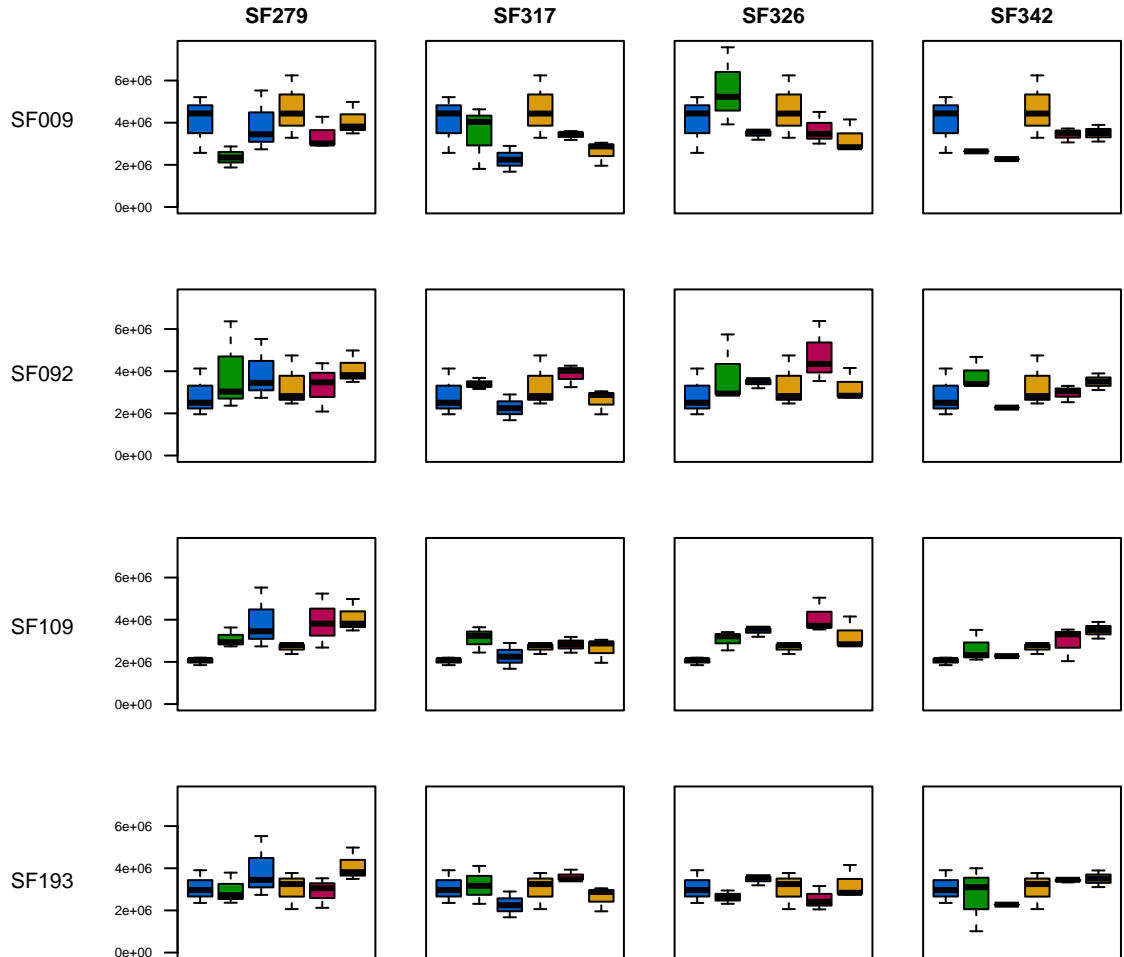

HanXRQChr11g0323921  
Putative jacalin-like lectin domain

- Parents WW
- Parents WD
- Hybrids WW
- Hybrids WD

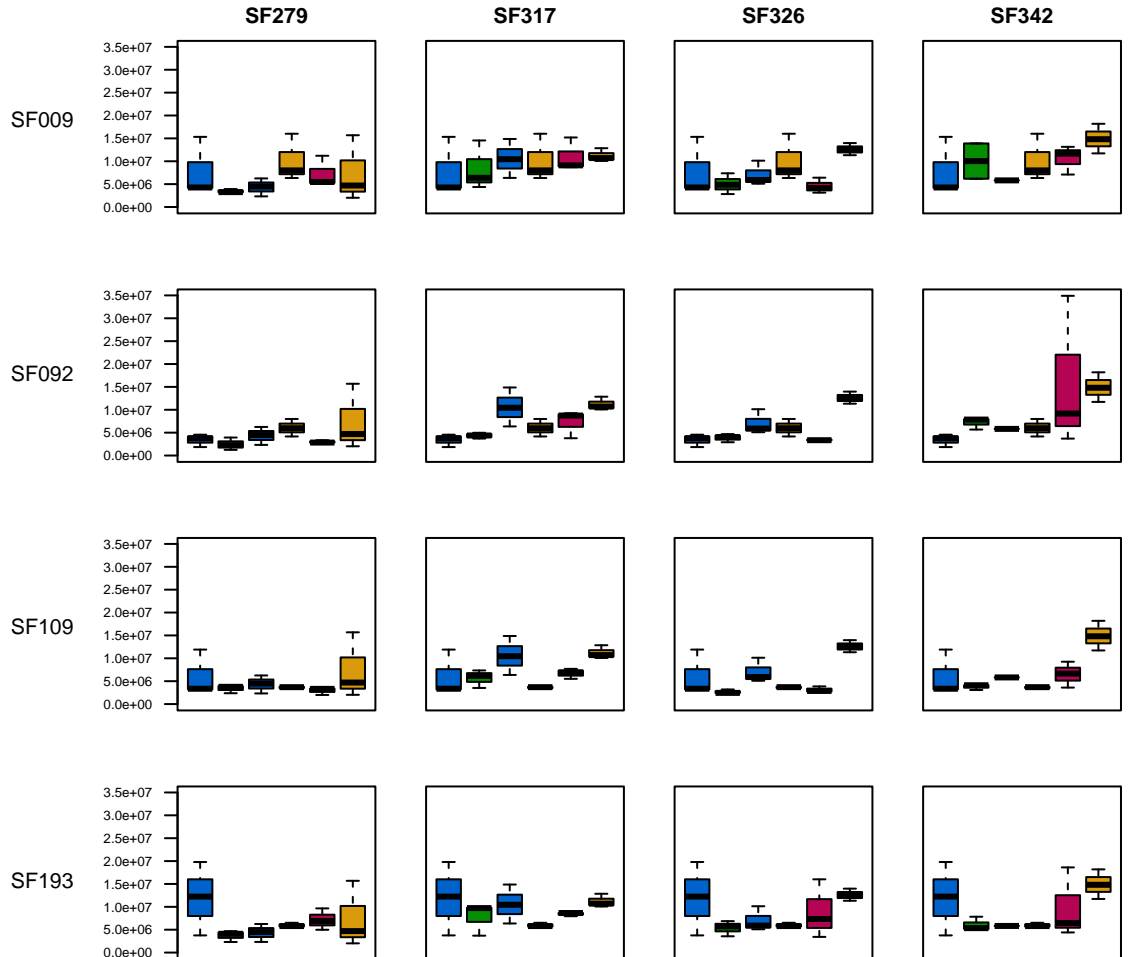

HanXRQChr10g0310191  
Putative glutamine synthetase type I;  
Glutamine synthetase, N-terminal conserve

■ Parents WW  
■ Parents WD  
■ Hybrids WW  
■ Hybrids WD

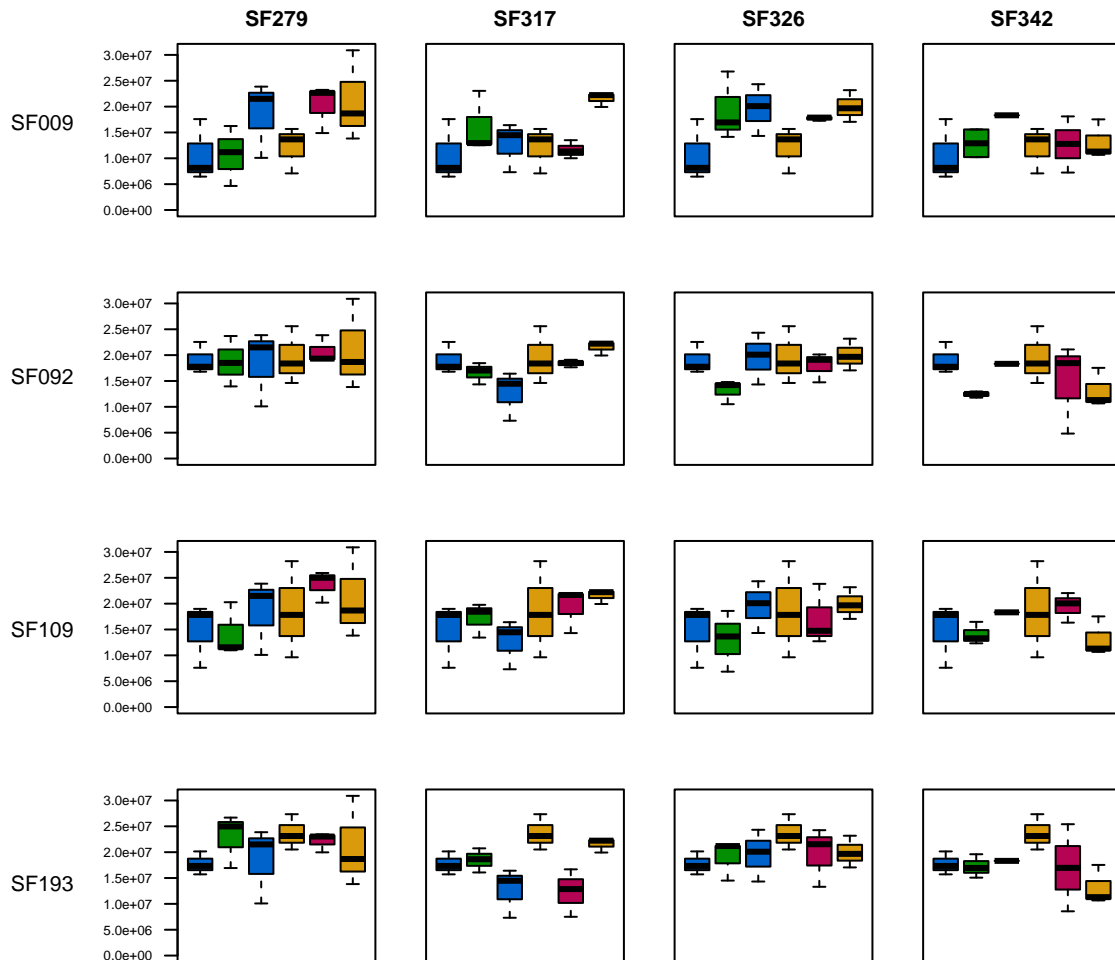

HanXRQChr08g0221071  
Putative pentapeptide repeat

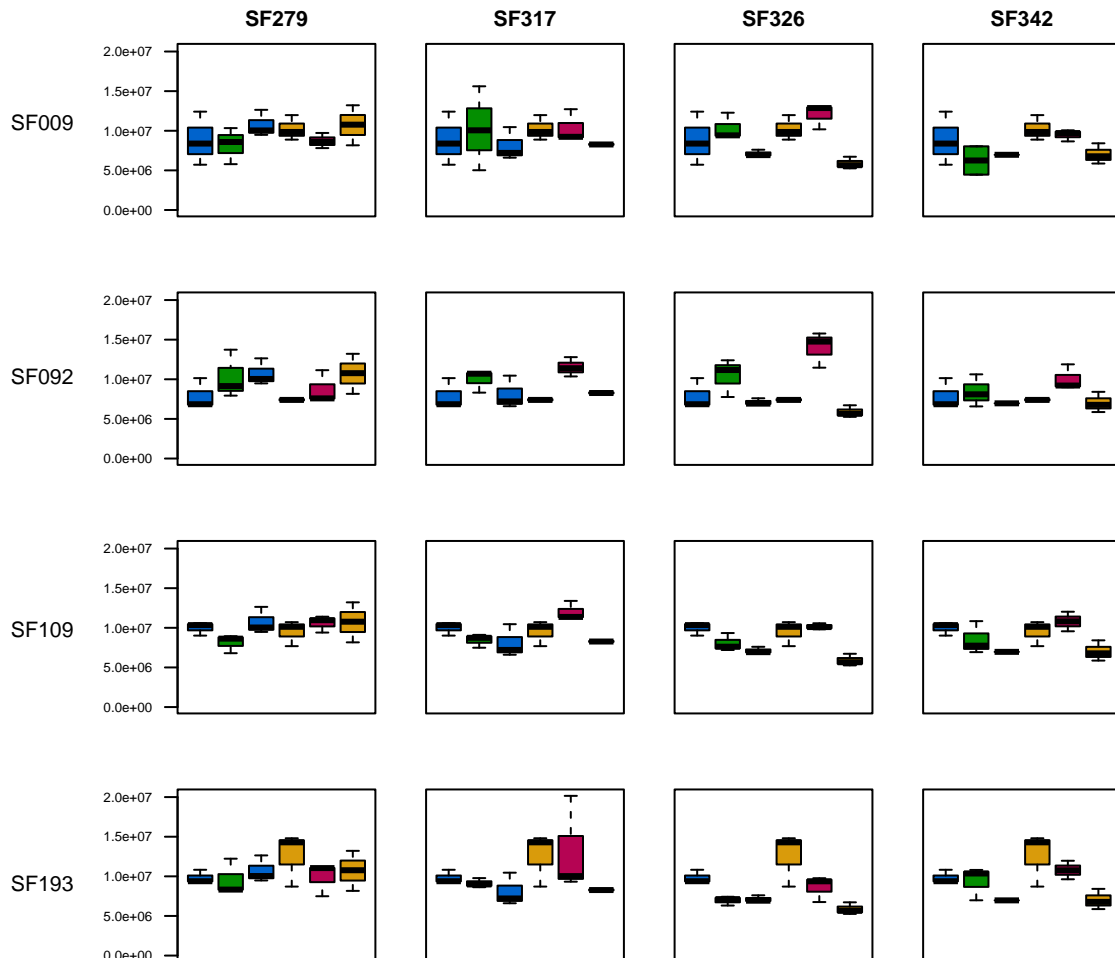



HanXRQChr01g0031071  
Putative small GTPase superfamily; Ran  
GTPase; P-loop containing nucleoside triph

Parents WW  
Parents WD  
Hybrids WW  
Hybrids WD

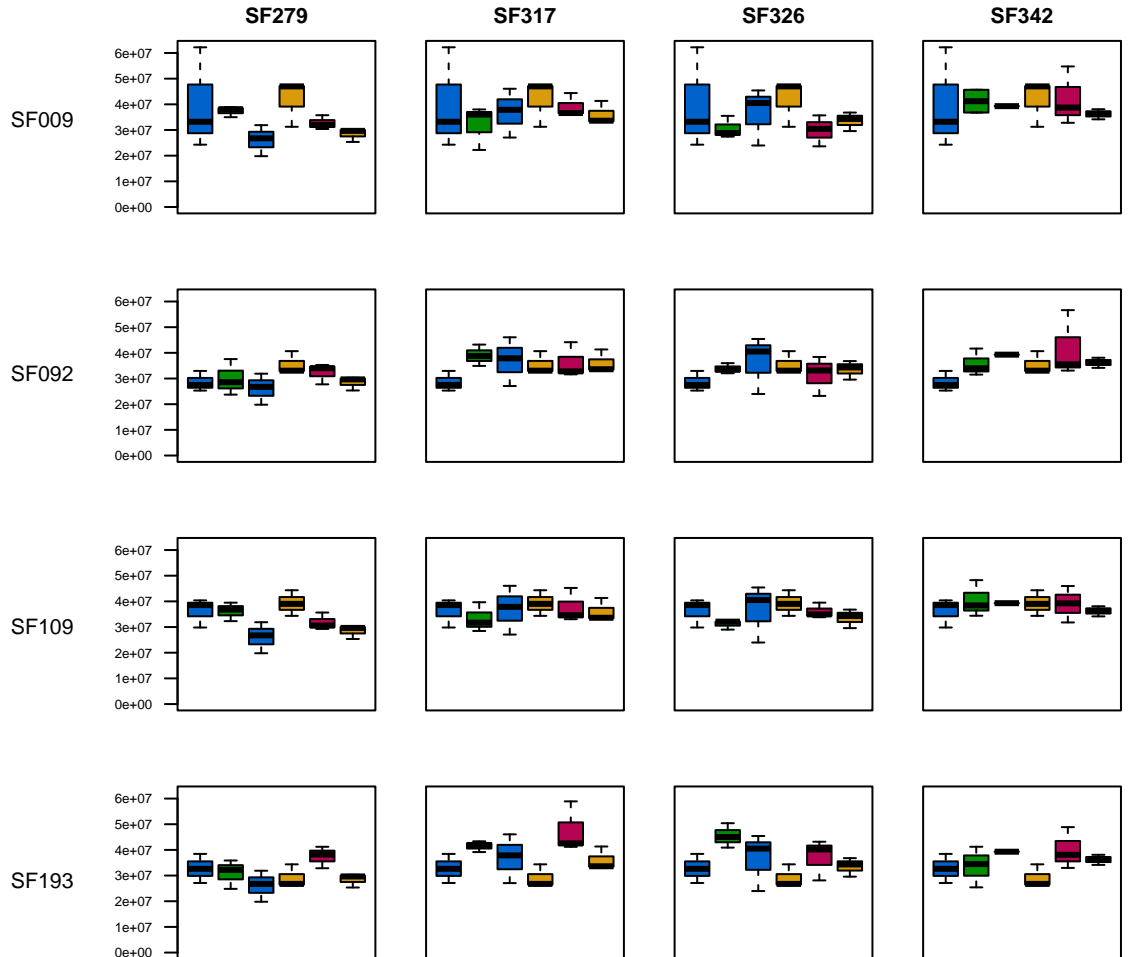

HanXRQChr03g0087971  
Probable elongation factor G-2,  
chloroplastic

Parents WW  
Parents WD  
Hybrids WW  
Hybrids WD

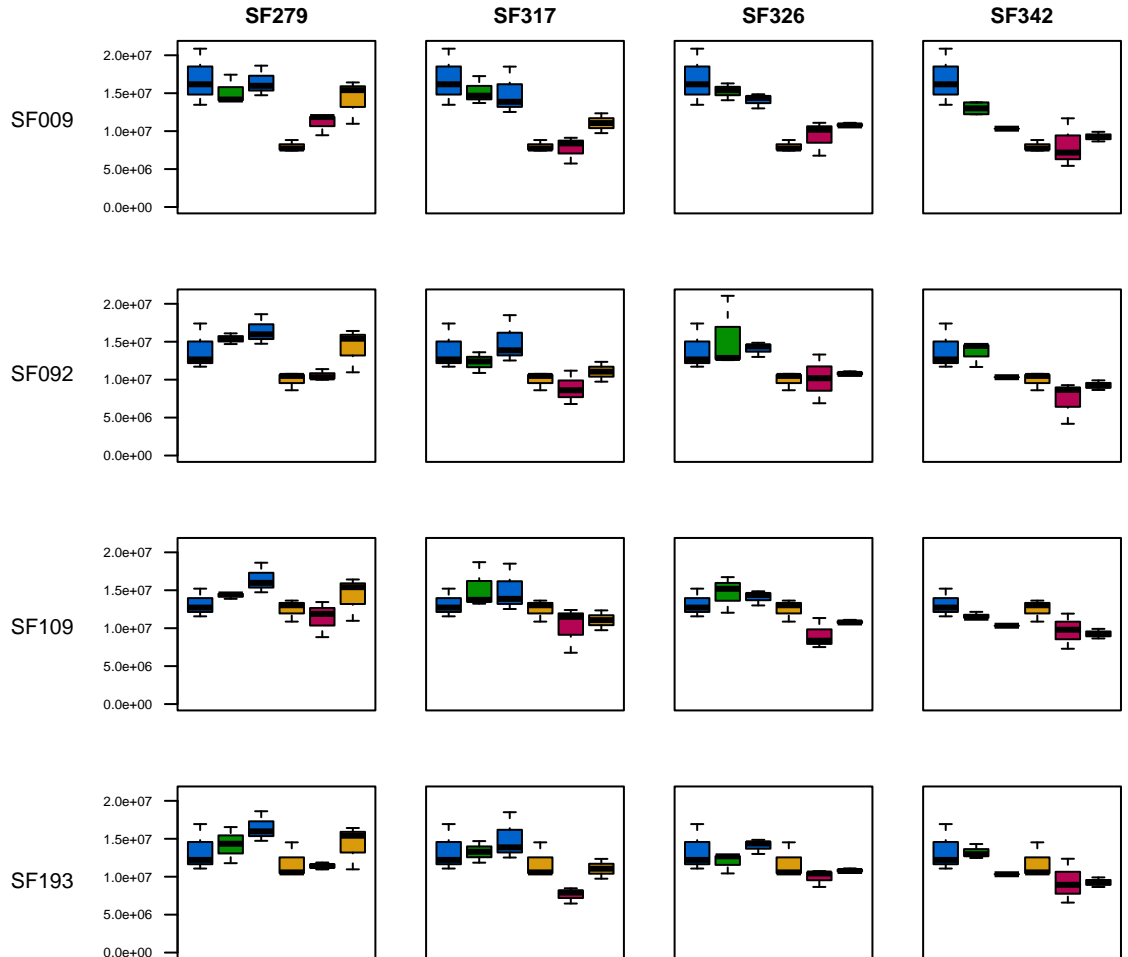

HanXRQChr17g0538191  
 Probable glycine dehydrogenase  
 (decarboxylating) A, mitochondrial

Parents WW  
 Parents WD  
 Hybrids WW  
 Hybrids WD

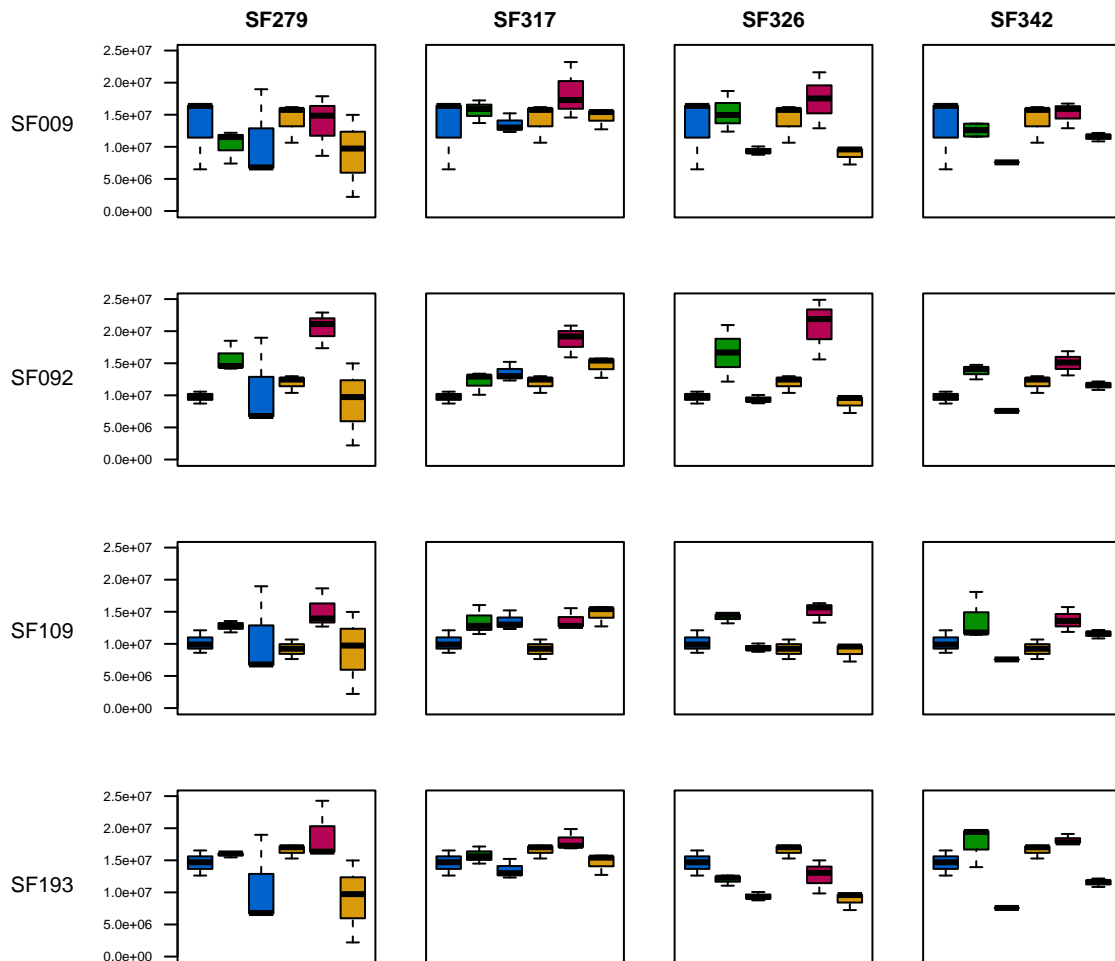

HanXRQChr08g0227471  
Probable TCP-1/cpn60 chaperonin family  
protein

Parents WW  
Parents WD  
Hybrids WW  
Hybrids WD

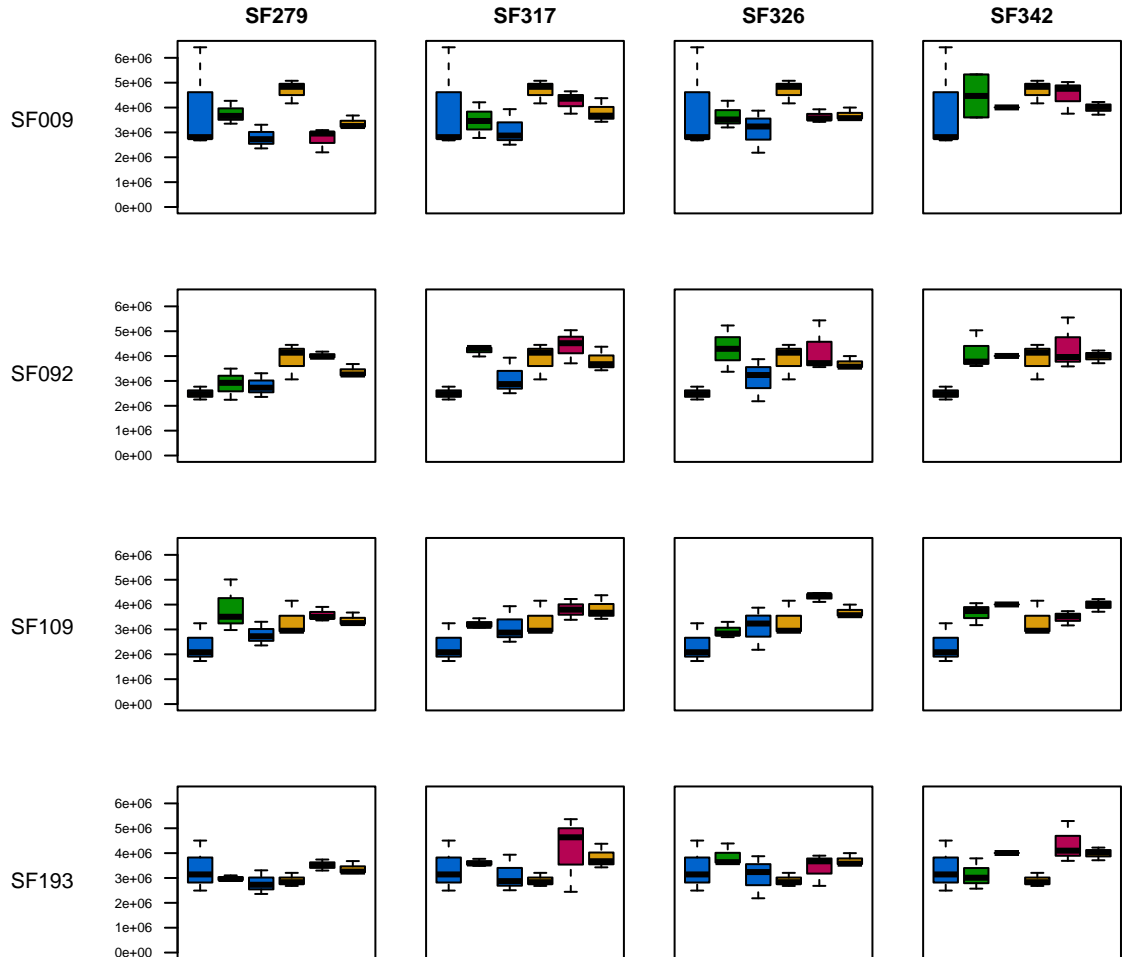

HanXRQChr16g0504391  
Putative SGNH hydrolase-type esterase  
domain

Parents WW  
Parents WD  
Hybrids WW  
Hybrids WD

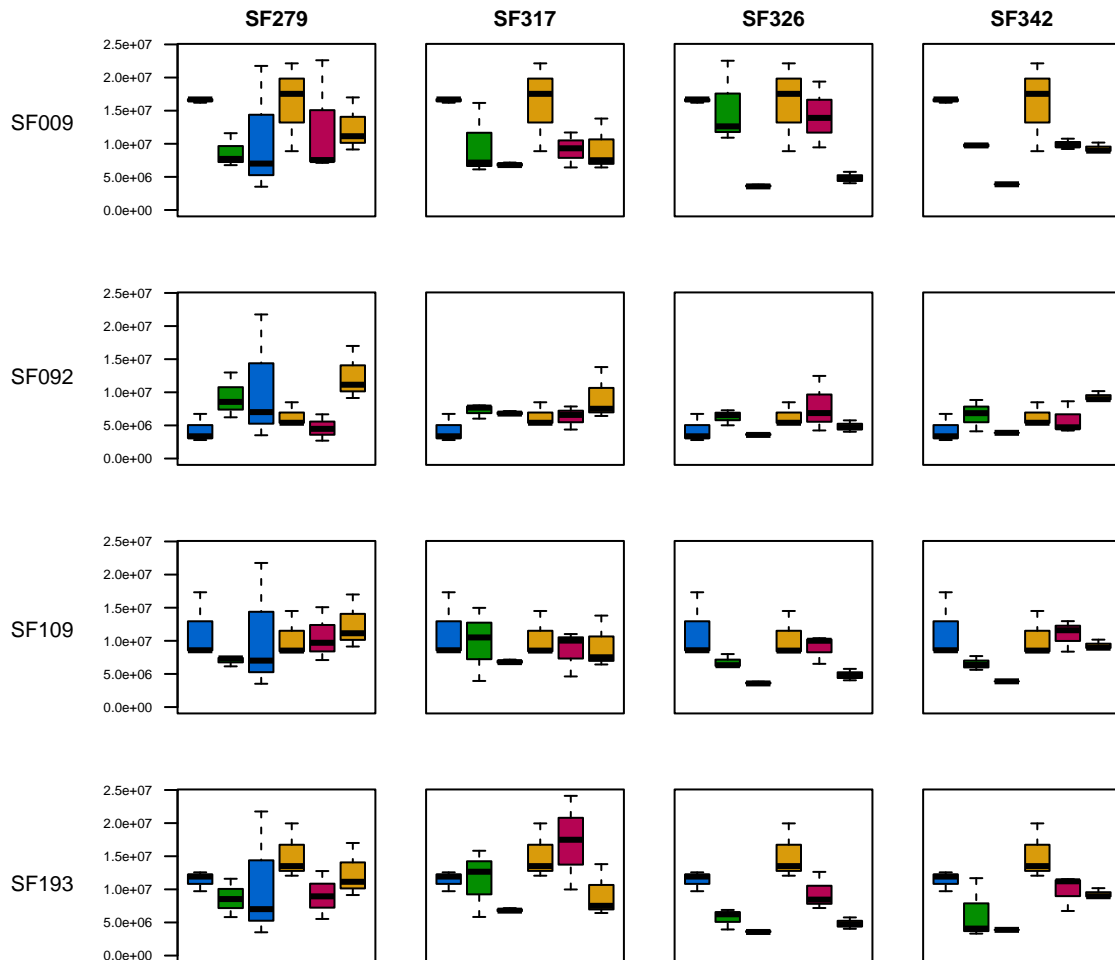

HanXRQChr06g0180591  
Probable putative lipocalin R877

Parents WW  
Parents WD  
Hybrids WW  
Hybrids WD

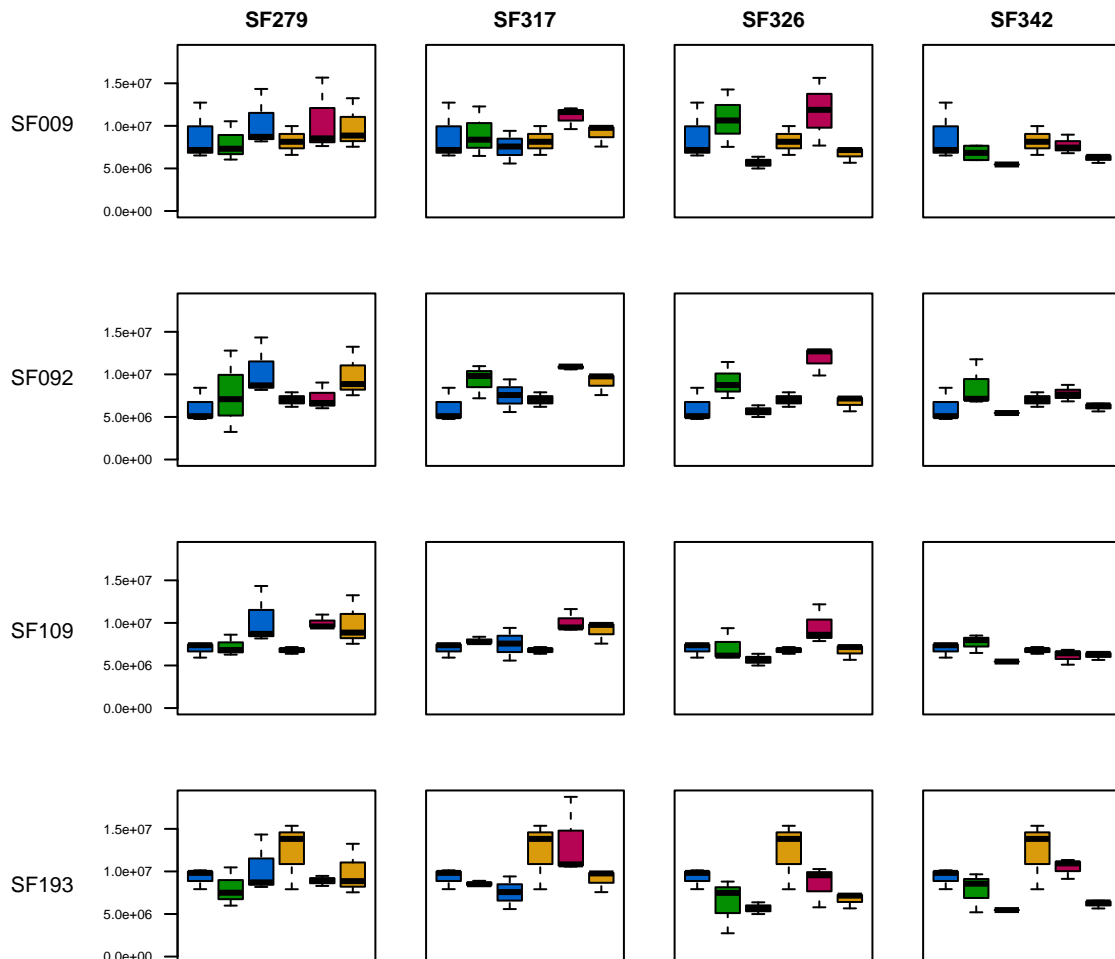

HanXRQChr01g0027931  
Probable 3-isopropylmalate  
dehydrogenase, chloroplastic

Parents WW  
Parents WD  
Hybrids WW  
Hybrids WD

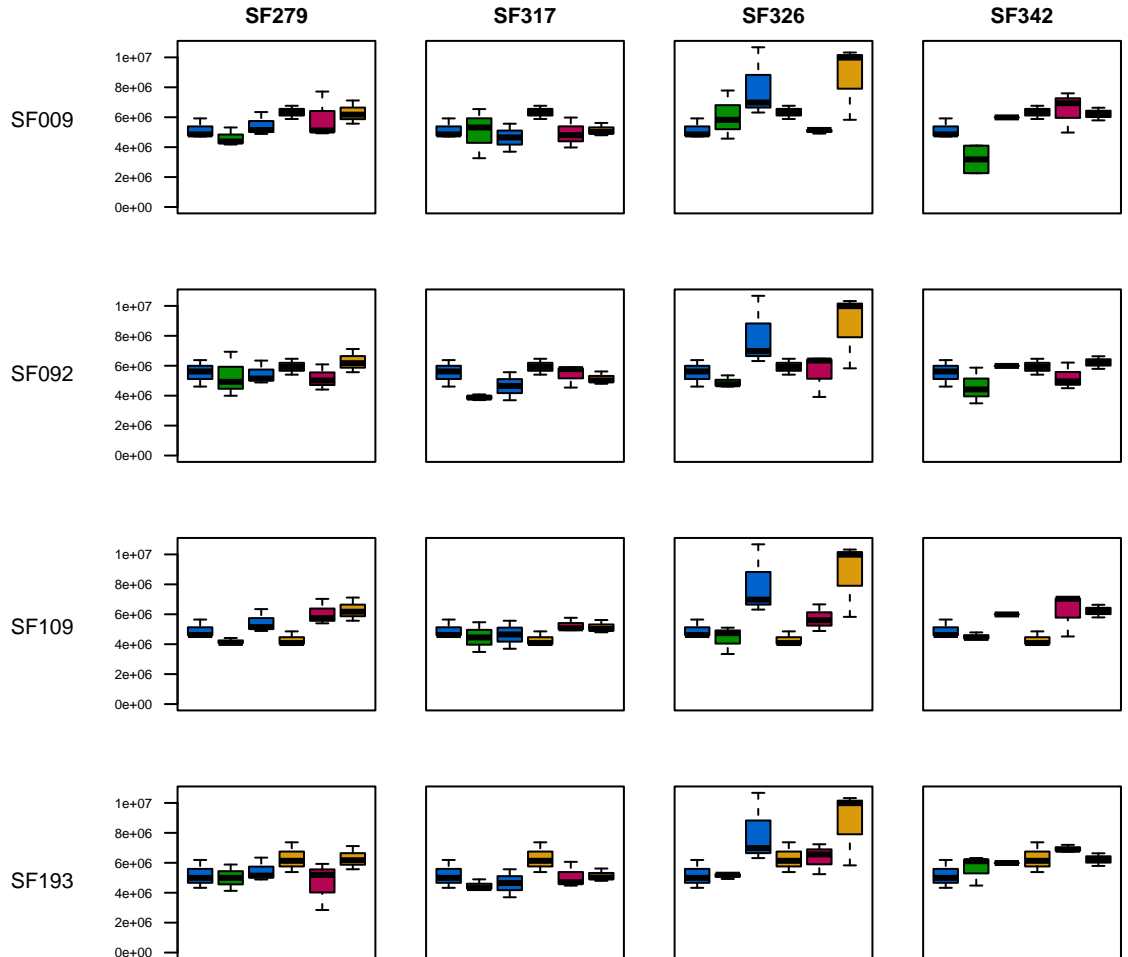

HanXRQChr09g0251531  
 Putative trypanothione reductase;  
 Dihydrolipoamide dehydrogenase; FAD/NAI

Parents WW  
 Parents WD  
 Hybrids WW  
 Hybrids WD

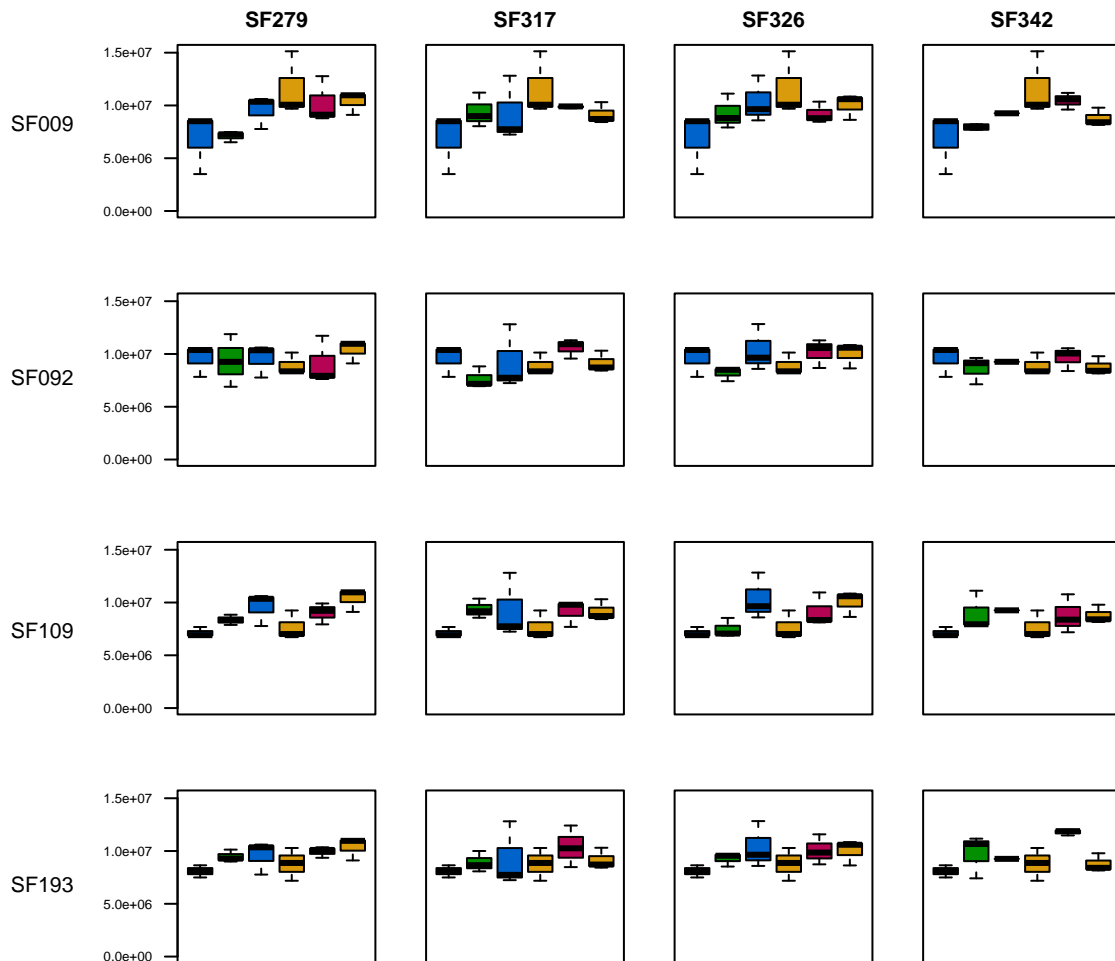



HanXRQChr10g0302621  
Putative ribosomal protein S20

Parents WW  
Parents WD  
Hybrids WW  
Hybrids WD

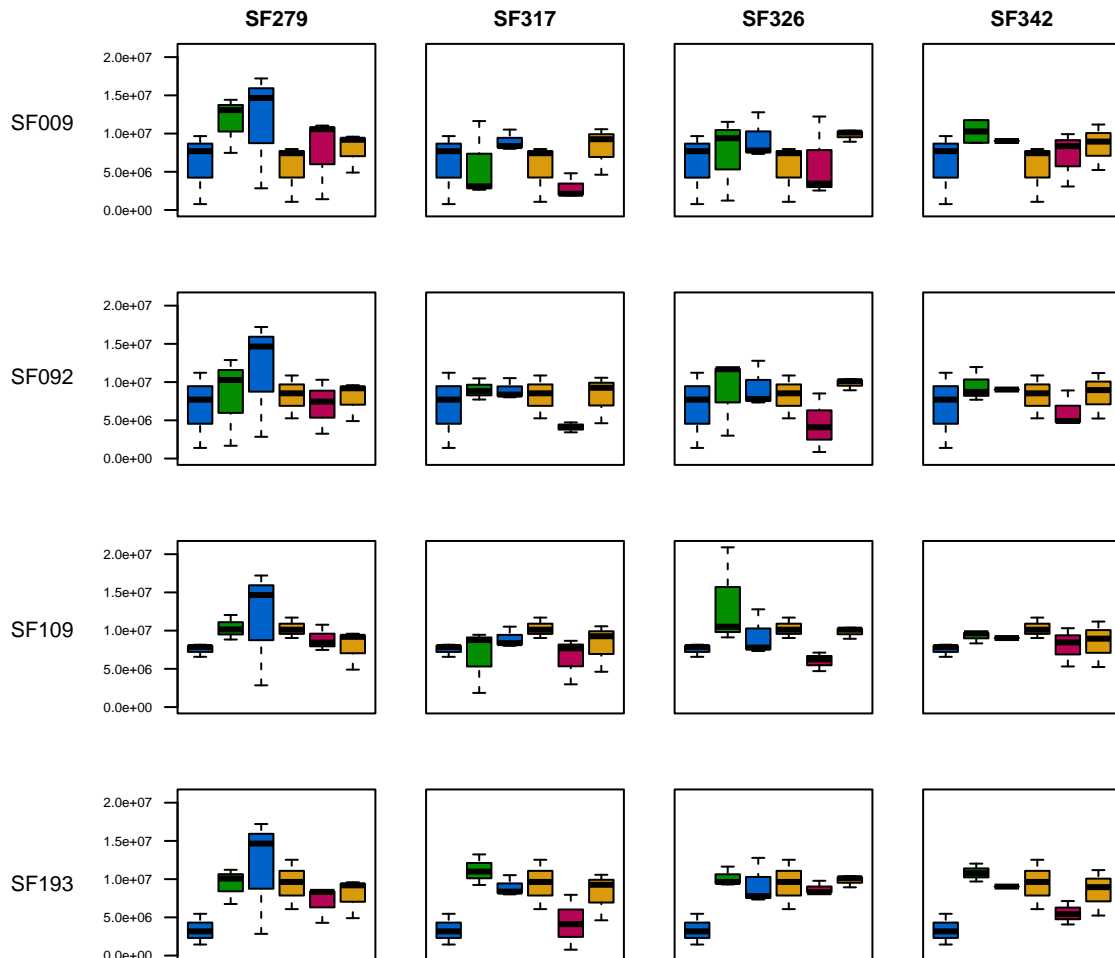

HanXRQChr13g0408251  
 Probable trigger factor type chaperone  
 family protein

Parents WW  
 Parents WD  
 Hybrids WW  
 Hybrids WD

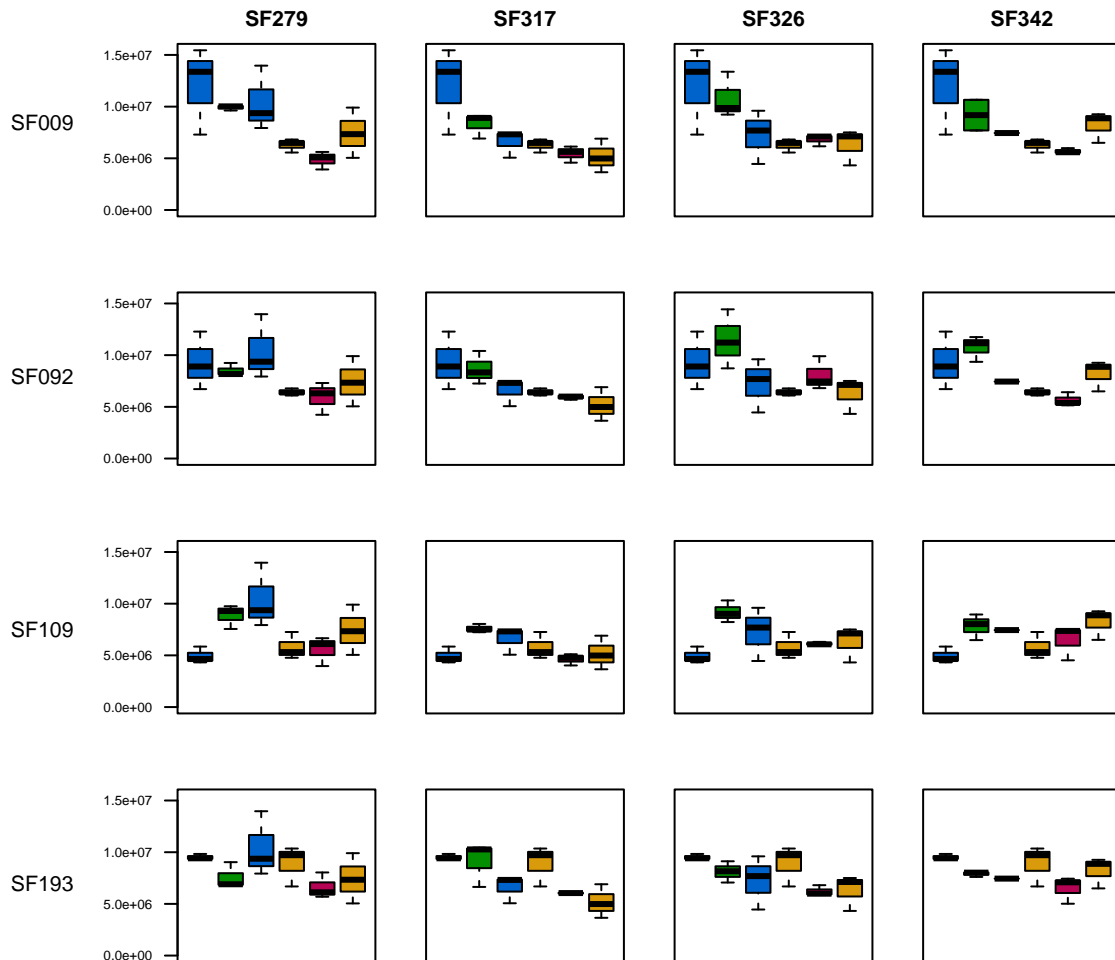

HanXRQChr11g0346641  
Probable stress responsive A/B Barrel  
Domain

Parents WW  
Parents WD  
Hybrids WW  
Hybrids WD

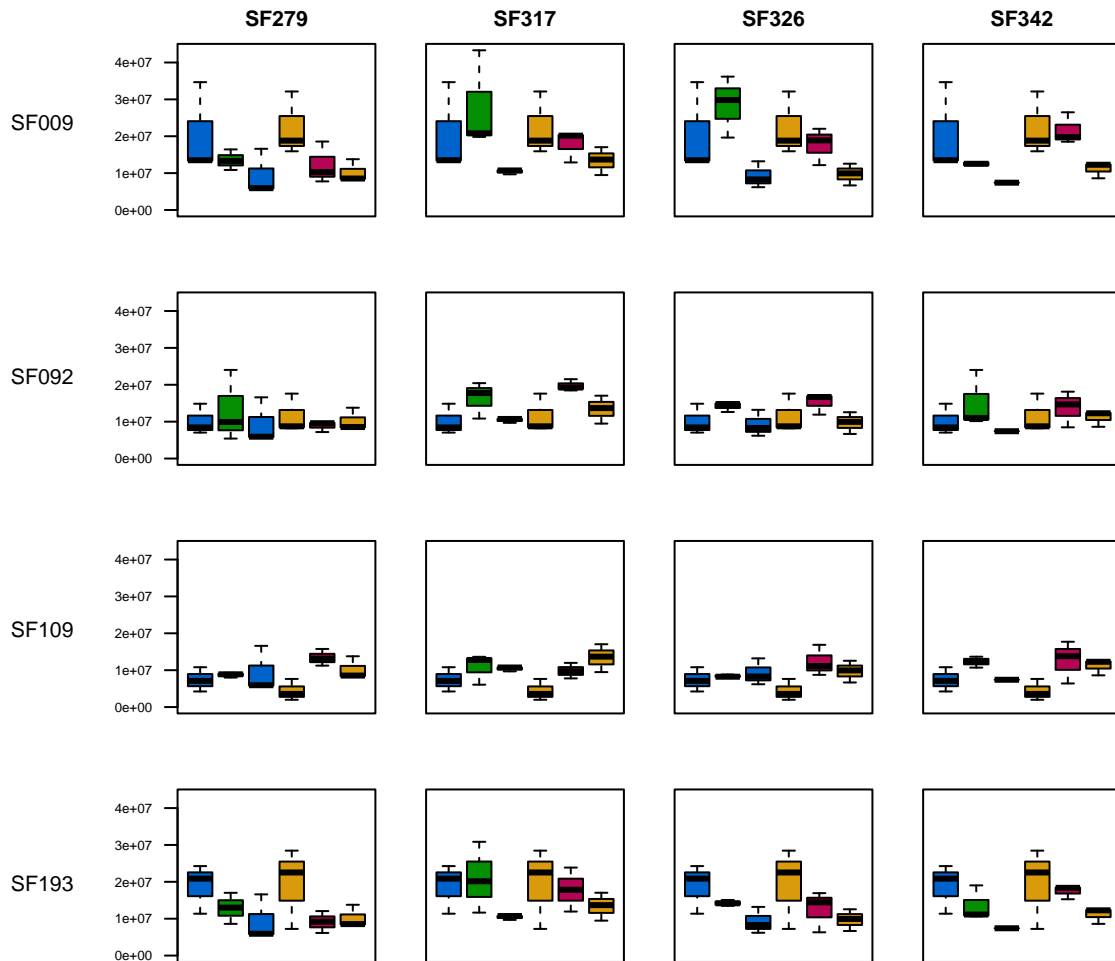

HanXRQChr01g0008641  
Putative ribosomal protein S10;  
Ribosomal protein S10 domain

Parents WW  
Parents WD  
Hybrids WW  
Hybrids WD

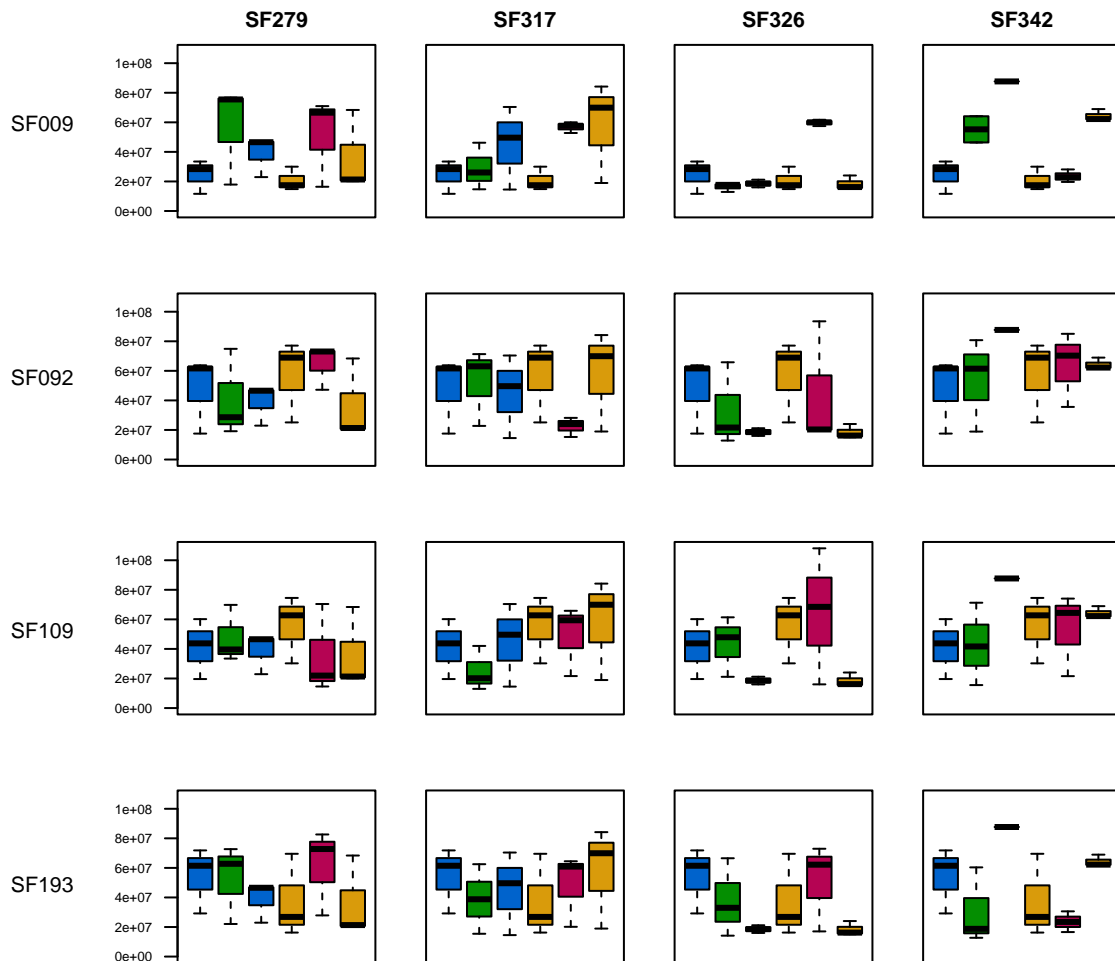

HanXRQChr17g0546671  
 Probable alpha-1,4 glucan phosphorylase  
 L-1 isozyme, chloroplastic/amyloplastic

Parents WW  
 Parents WD  
 Hybrids WW  
 Hybrids WD

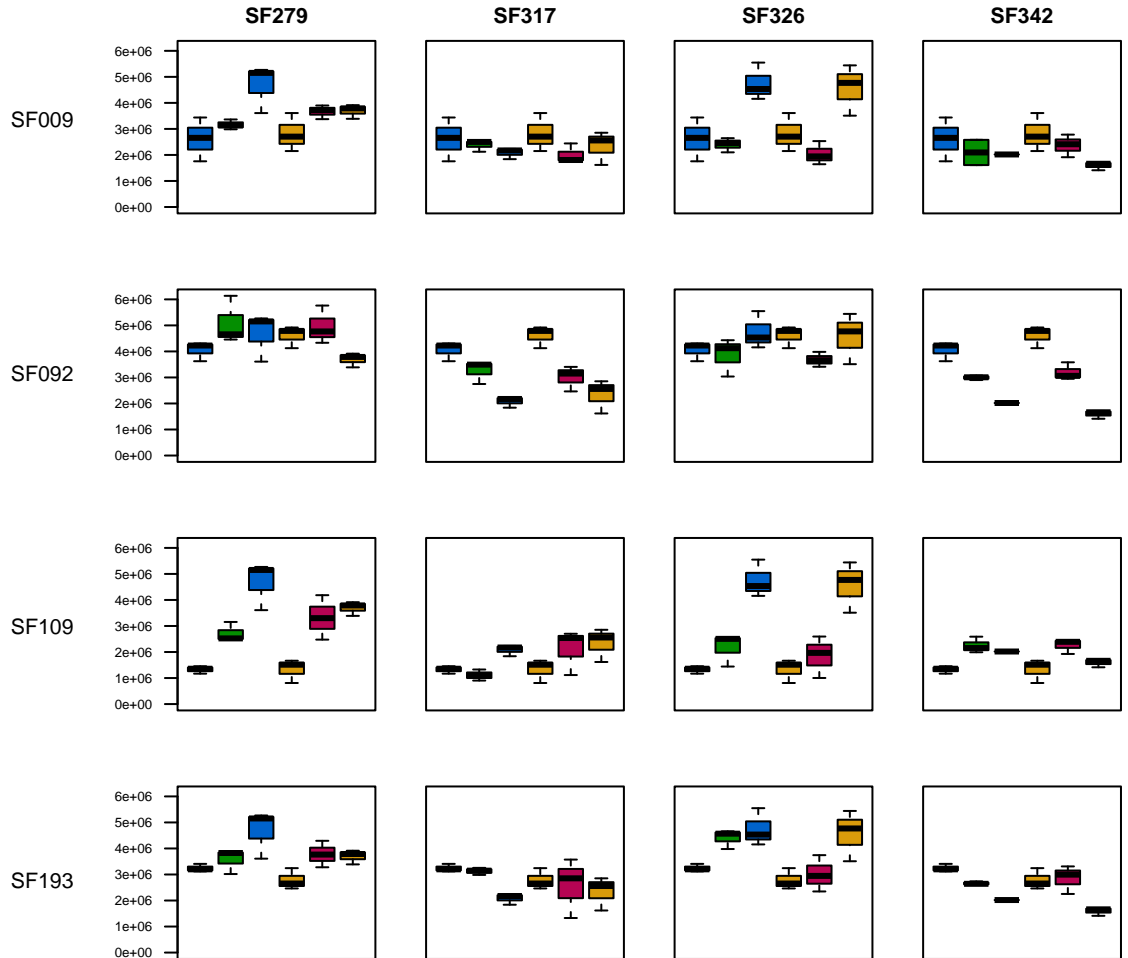

HanXRQChr15g0496981  
Probable nascent polypeptide-associated  
complex subunit alpha-like protein 2

Parents WW  
Parents WD  
Hybrids WW  
Hybrids WD

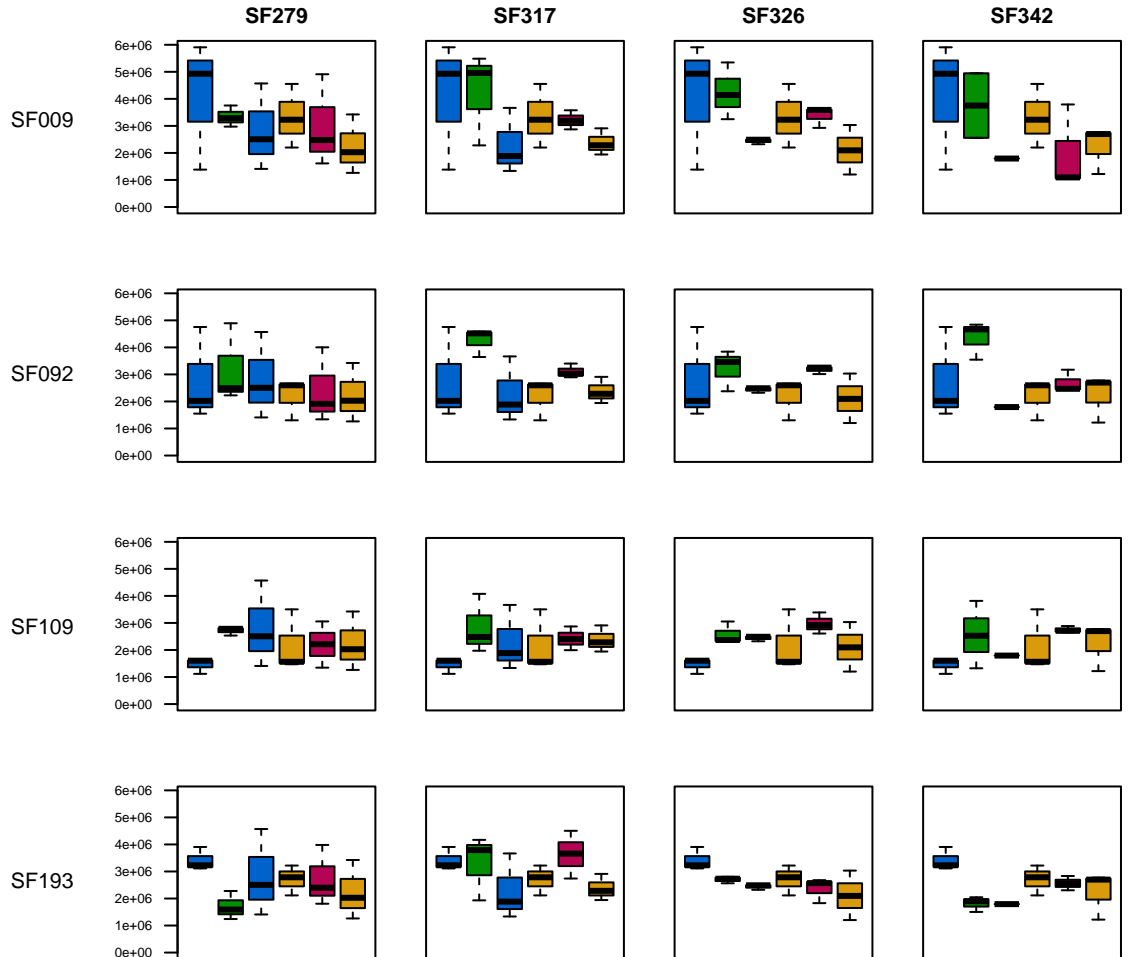

HanXRQChr10g0299231  
Probable protein disulfide-isomerase A6

- Parents WW
- Parents WD
- Hybrids WW
- Hybrids WD

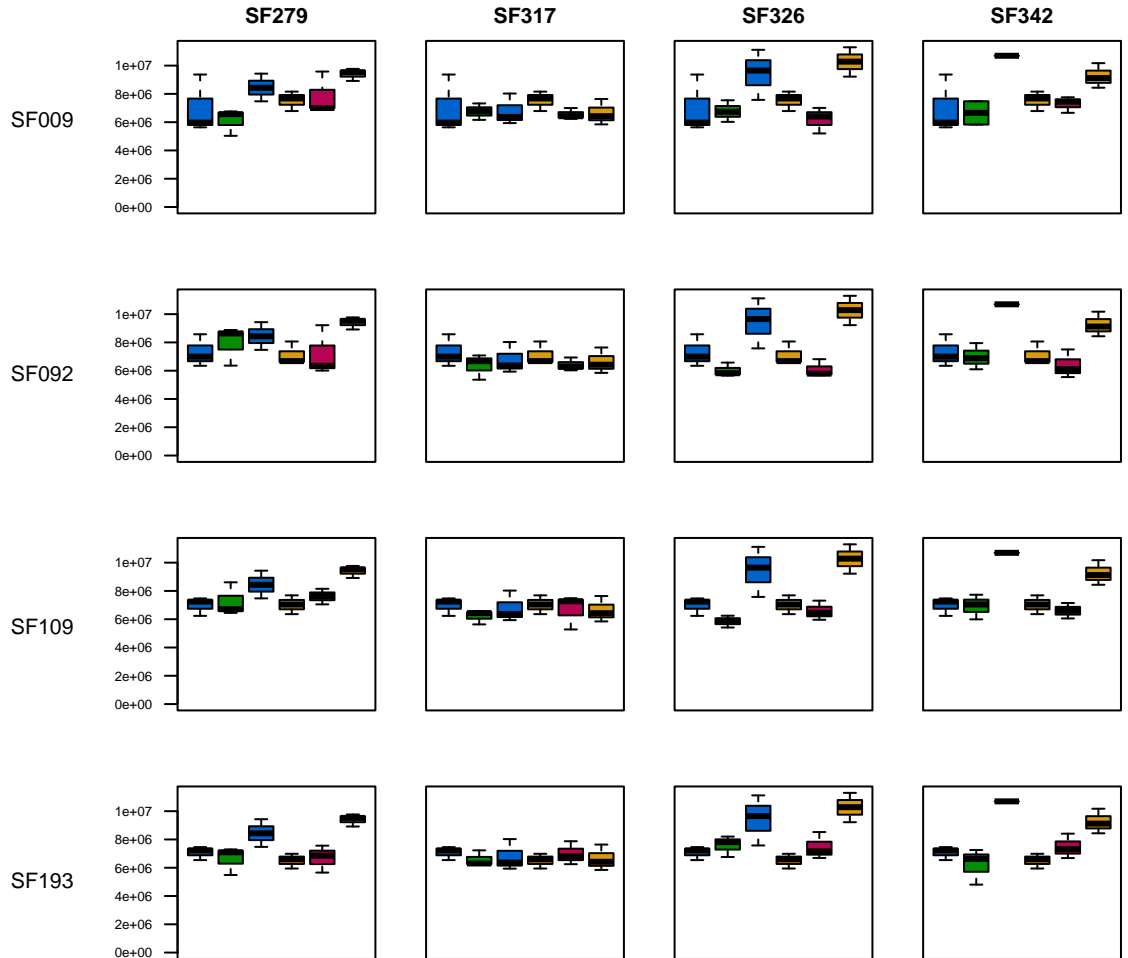

HanXRQChr11g0328551  
Probable early nodulin-like protein 2

- Parents WW
- Parents WD
- Hybrids WW
- Hybrids WD

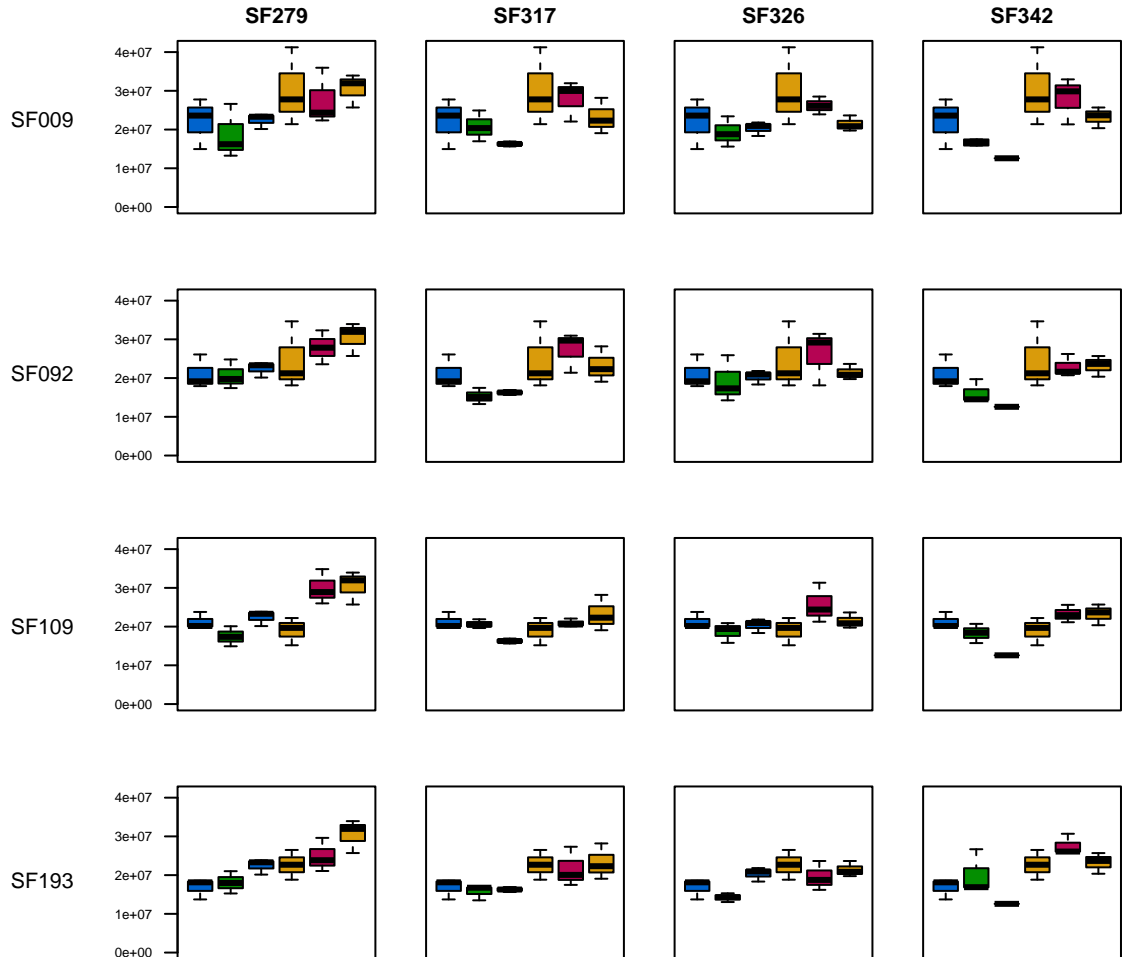



HanXRQChr09g0276701  
Probable endochitinase

Parents WW  
Parents WD  
Hybrids WW  
Hybrids WD

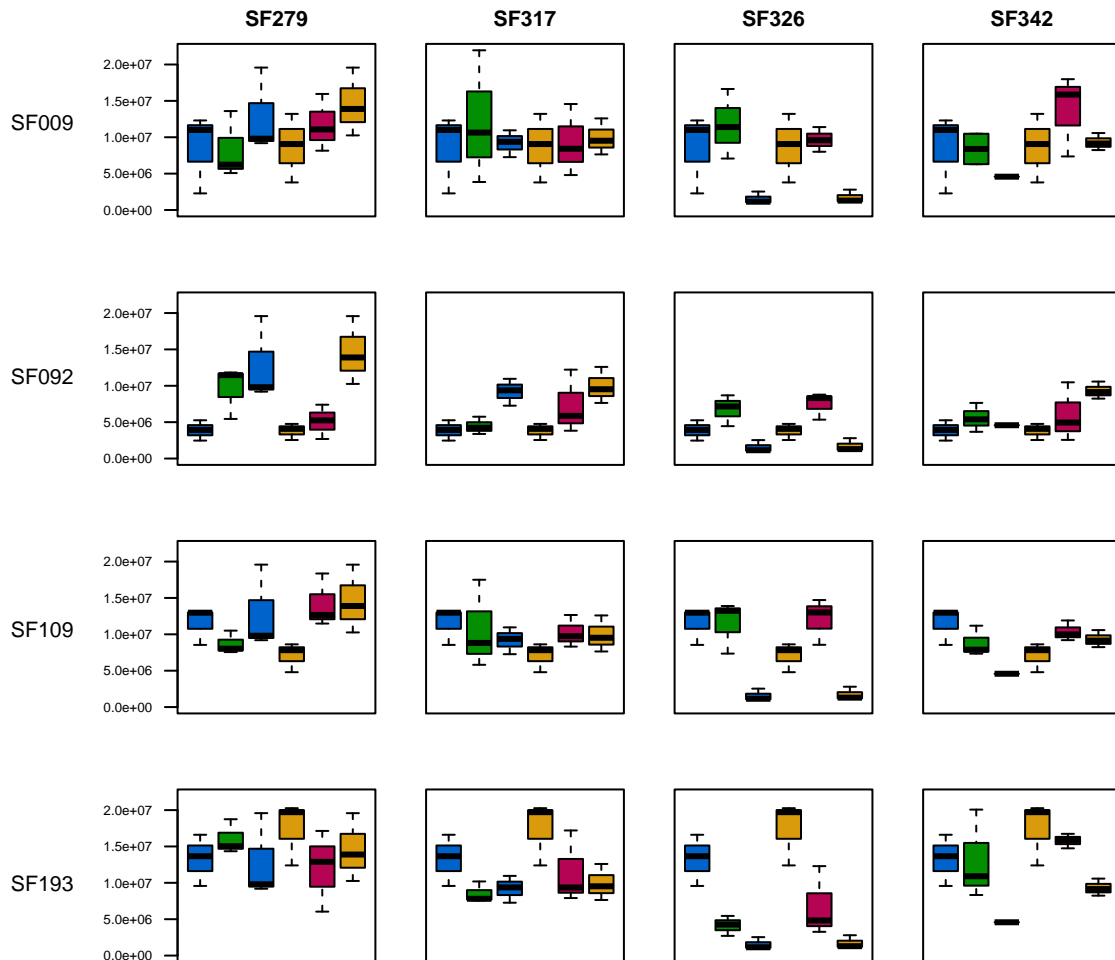

HanXRQChr05g0150981  
Probable transducin/WD40 repeat-like  
superfamily protein

Parents WW  
Parents WD  
Hybrids WW  
Hybrids WD

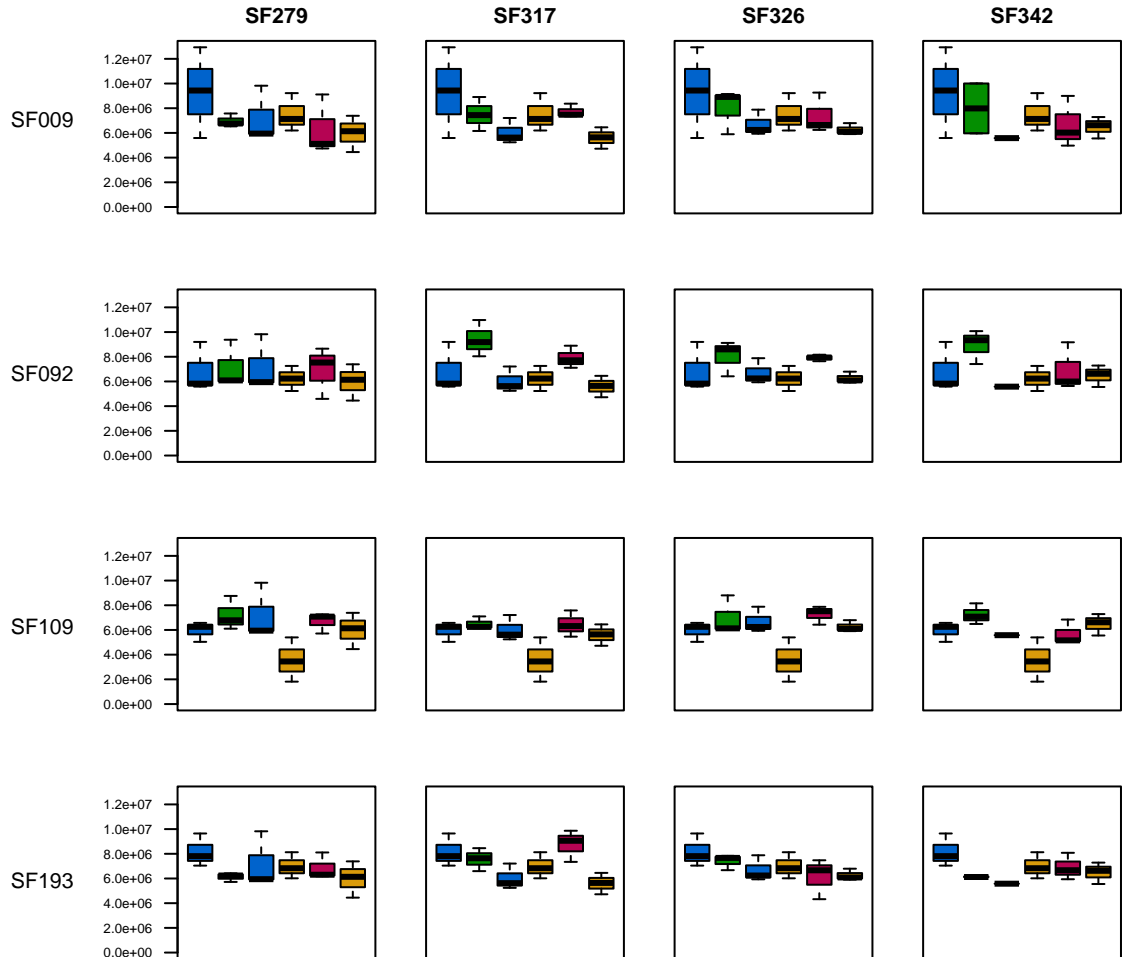

HanXRQChr12g0363751  
Probable acylaminoacyl-peptidase-related

Parents WW  
Parents WD  
Hybrids WW  
Hybrids WD

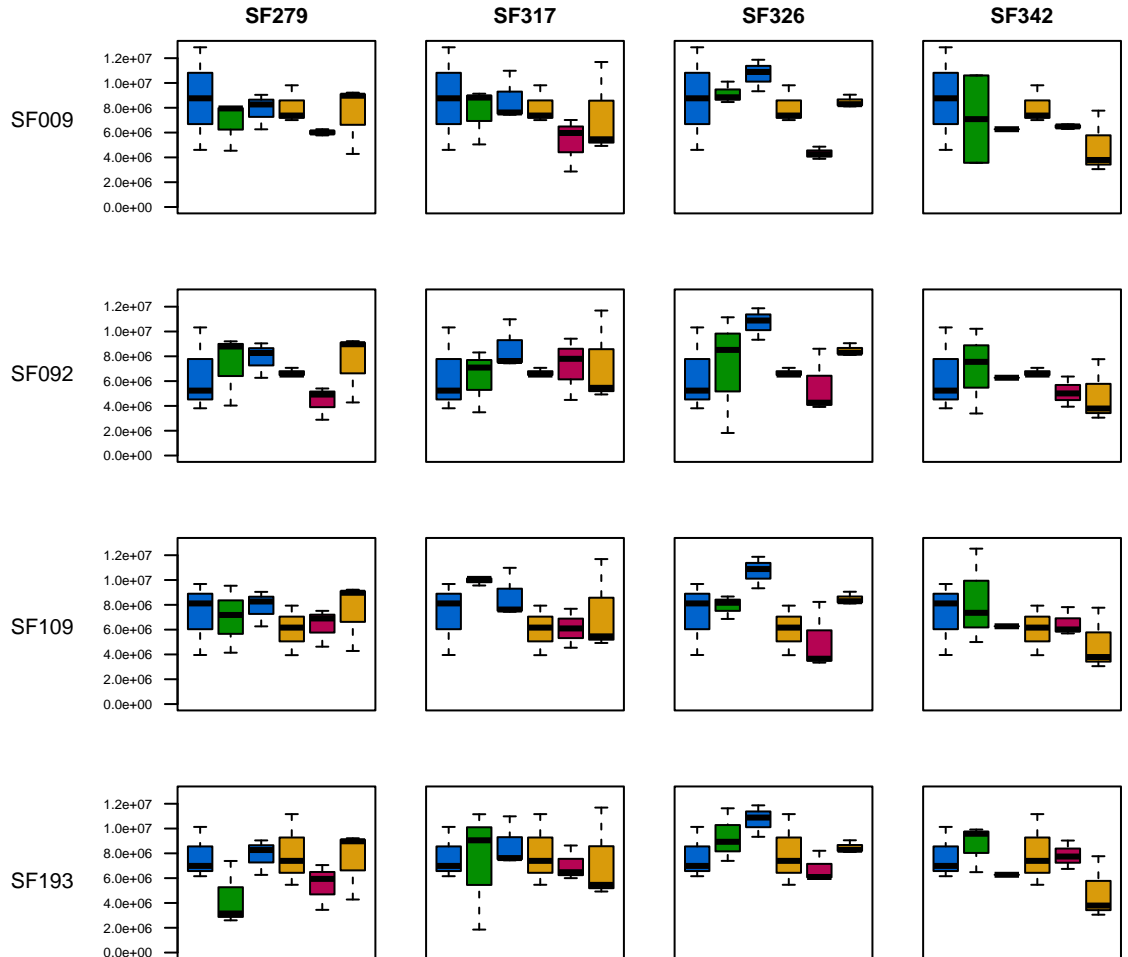

HanXRQChr01g0004241  
Probable ATP binding cassette protein 1

Parents WW  
Parents WD  
Hybrids WW  
Hybrids WD

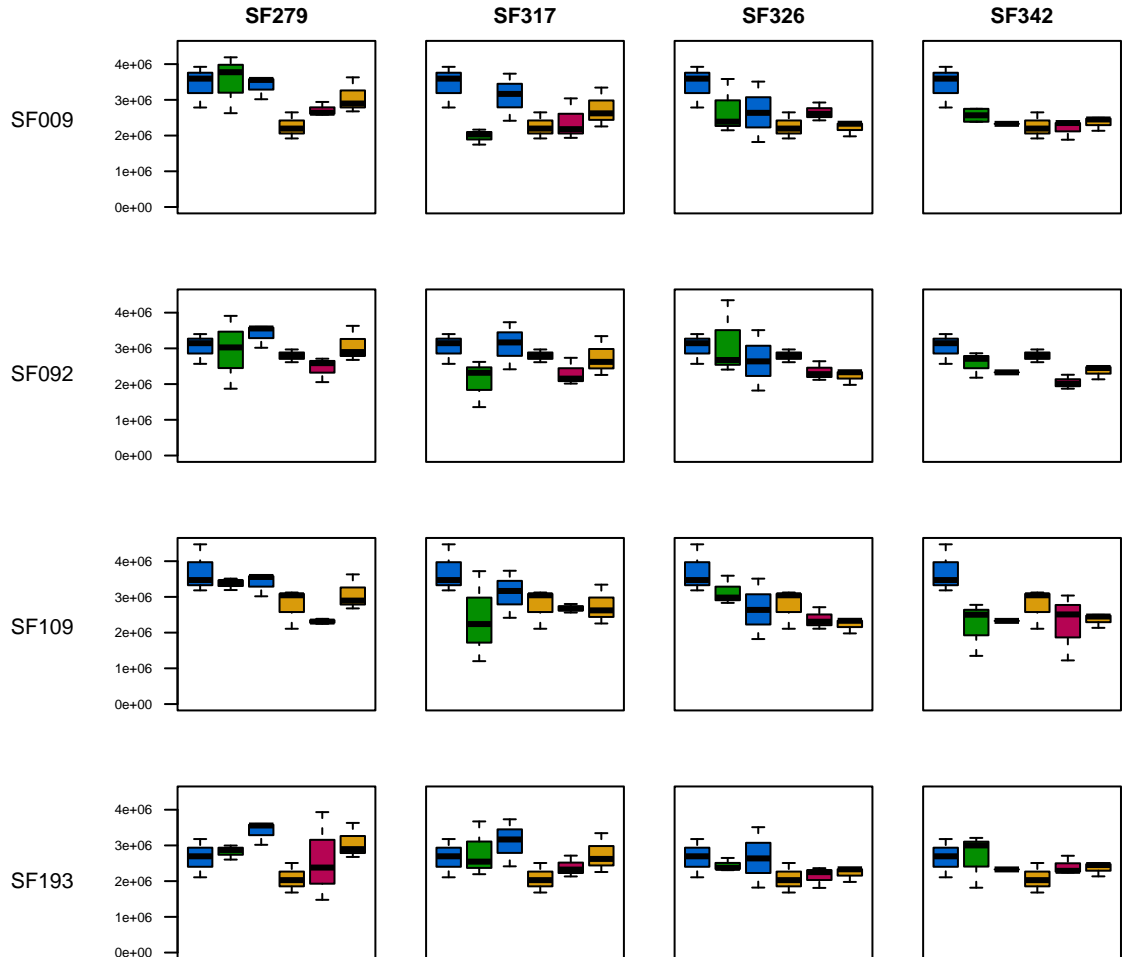

HanXRQChr05g0136091  
Probable mitochondrial import inner  
membrane translocase subunit Tim9

Parents WW  
Parents WD  
Hybrids WW  
Hybrids WD

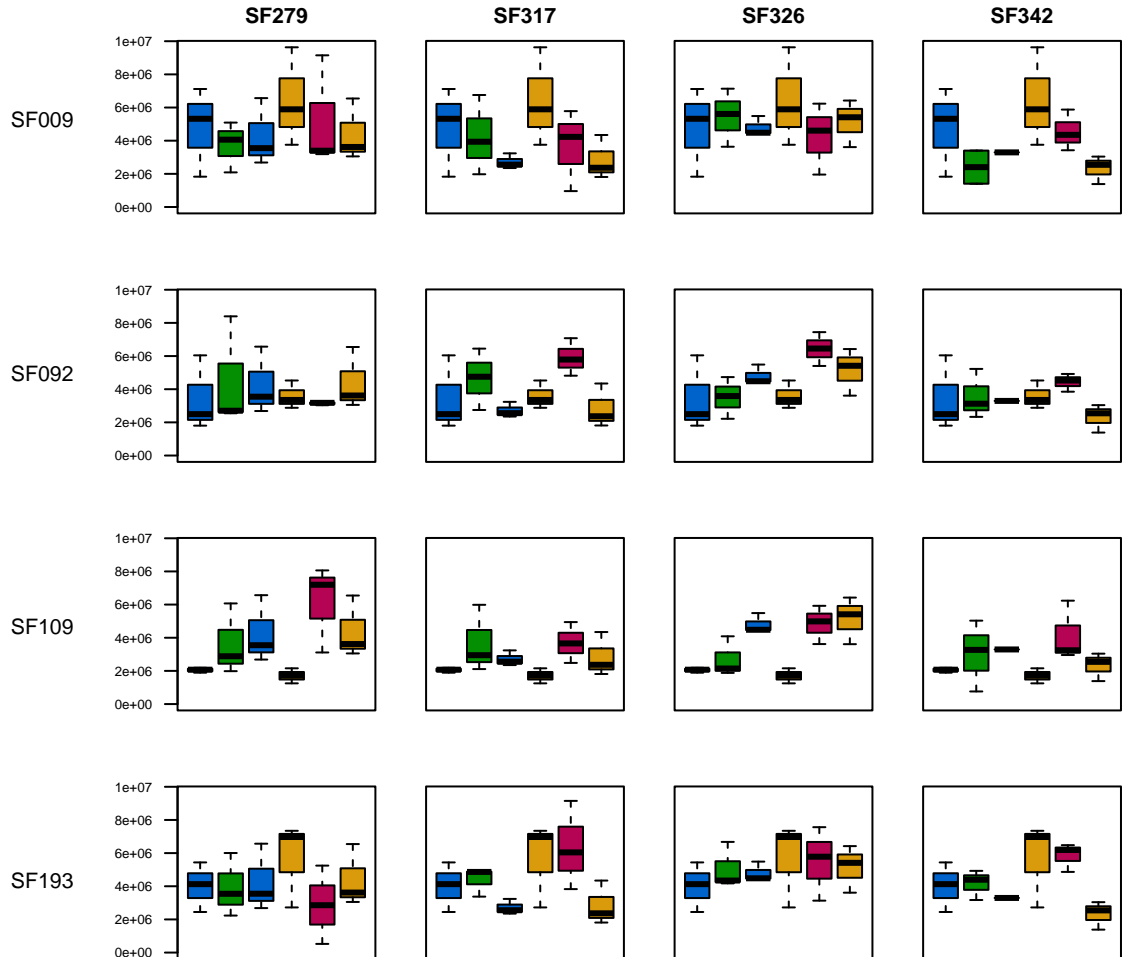

HanXRQChr10g0282441  
Probable ribosome-recycling factor,  
chloroplastic

Parents WW  
Parents WD  
Hybrids WW  
Hybrids WD

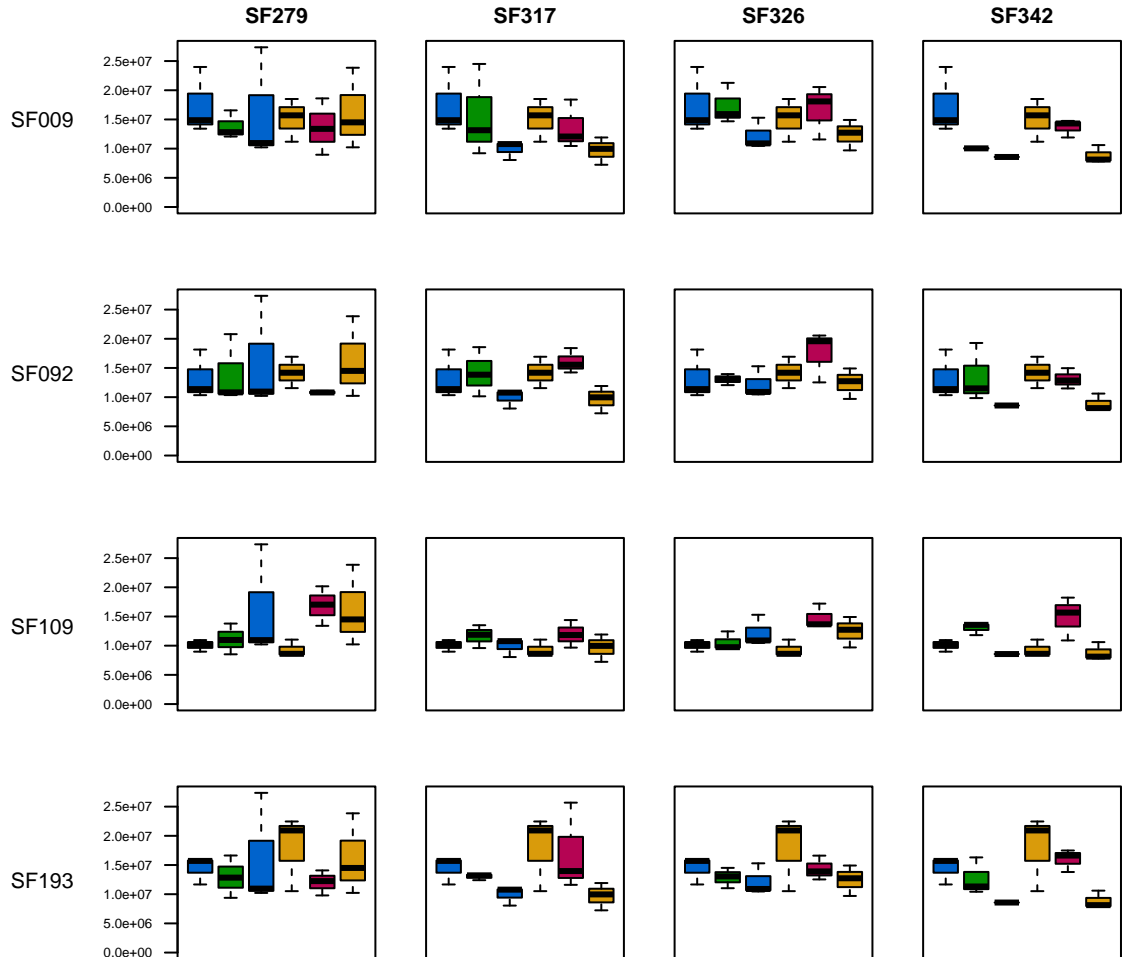

HanXRQChr16g0515191  
Probable uncharacterised conserved  
protein (UCP030210)

Parents WW  
Parents WD  
Hybrids WW  
Hybrids WD

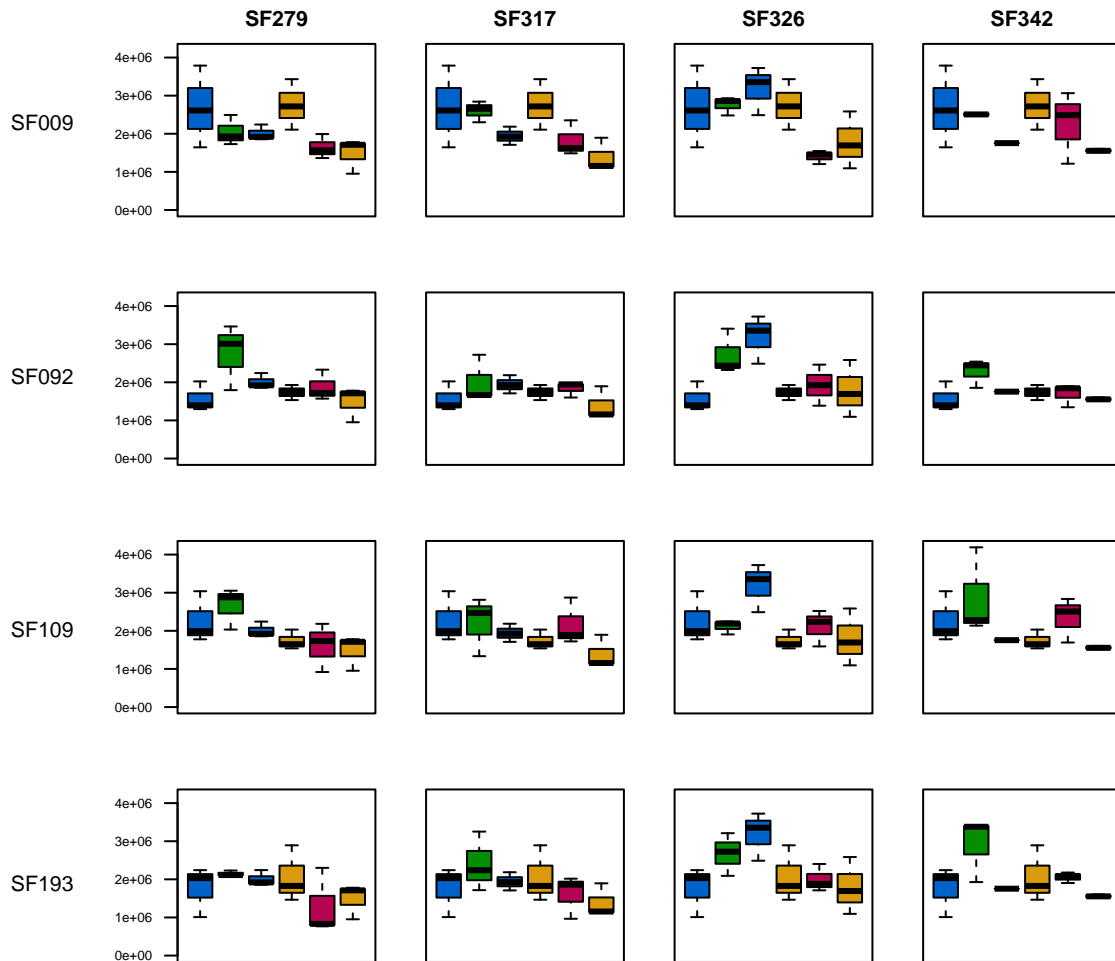

HanXRQChr09g0268981  
Probable ribosomal protein L31

- Parents WW
- Parents WD
- Hybrids WW
- Hybrids WD

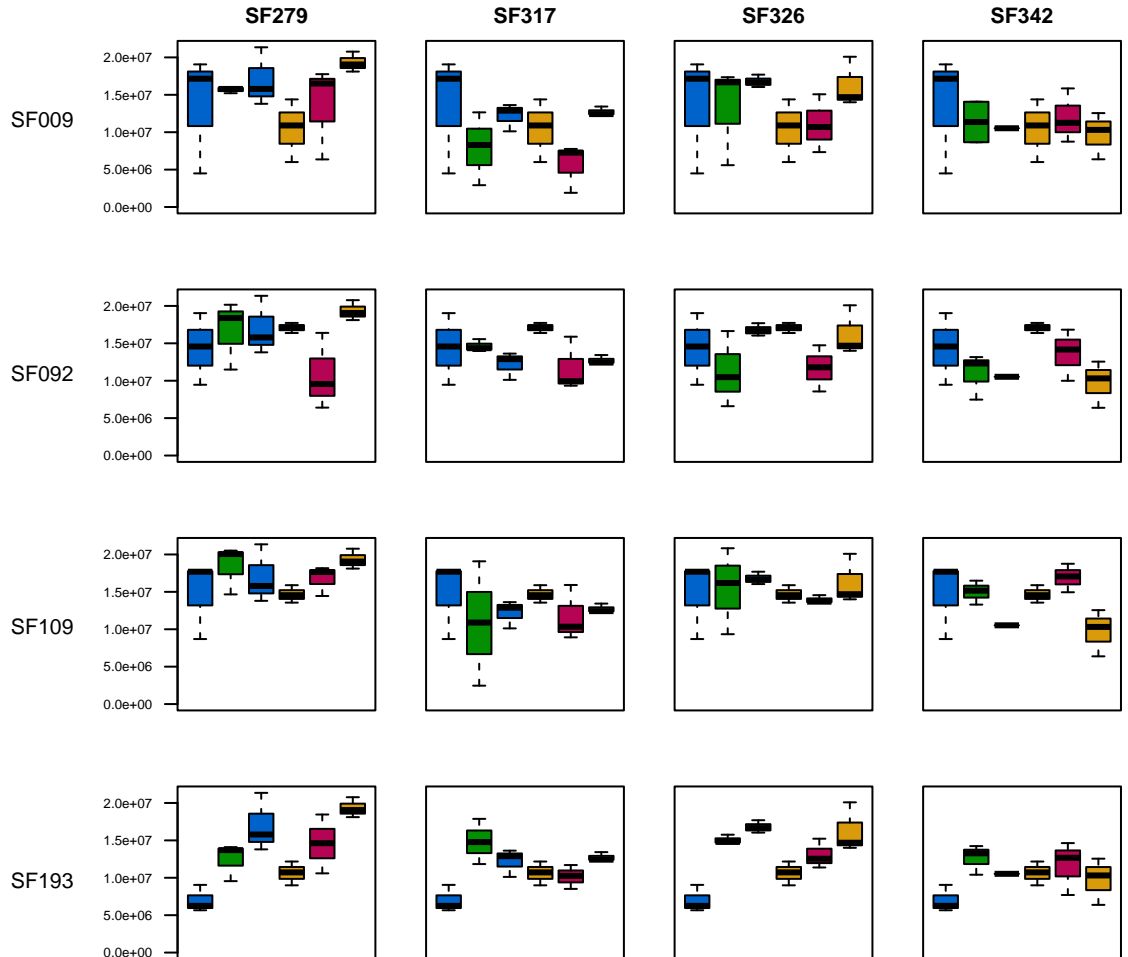



HanXRQChr01g0025631  
Putative thioredoxin-like fold

Parents WW  
Parents WD  
Hybrids WW  
Hybrids WD

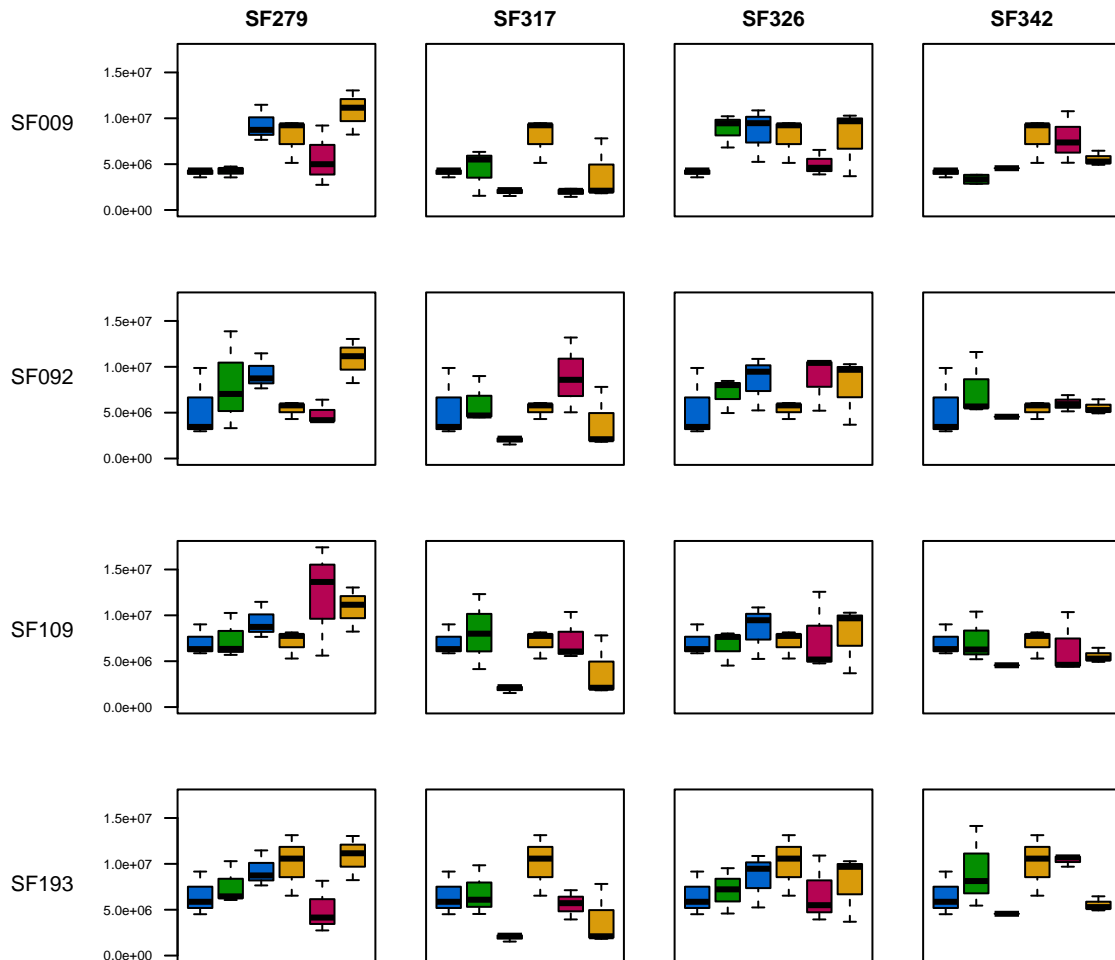

HanXRQChr08g0212111  
Probable groES-like family protein

- Parents WW
- Parents WD
- Hybrids WW
- Hybrids WD

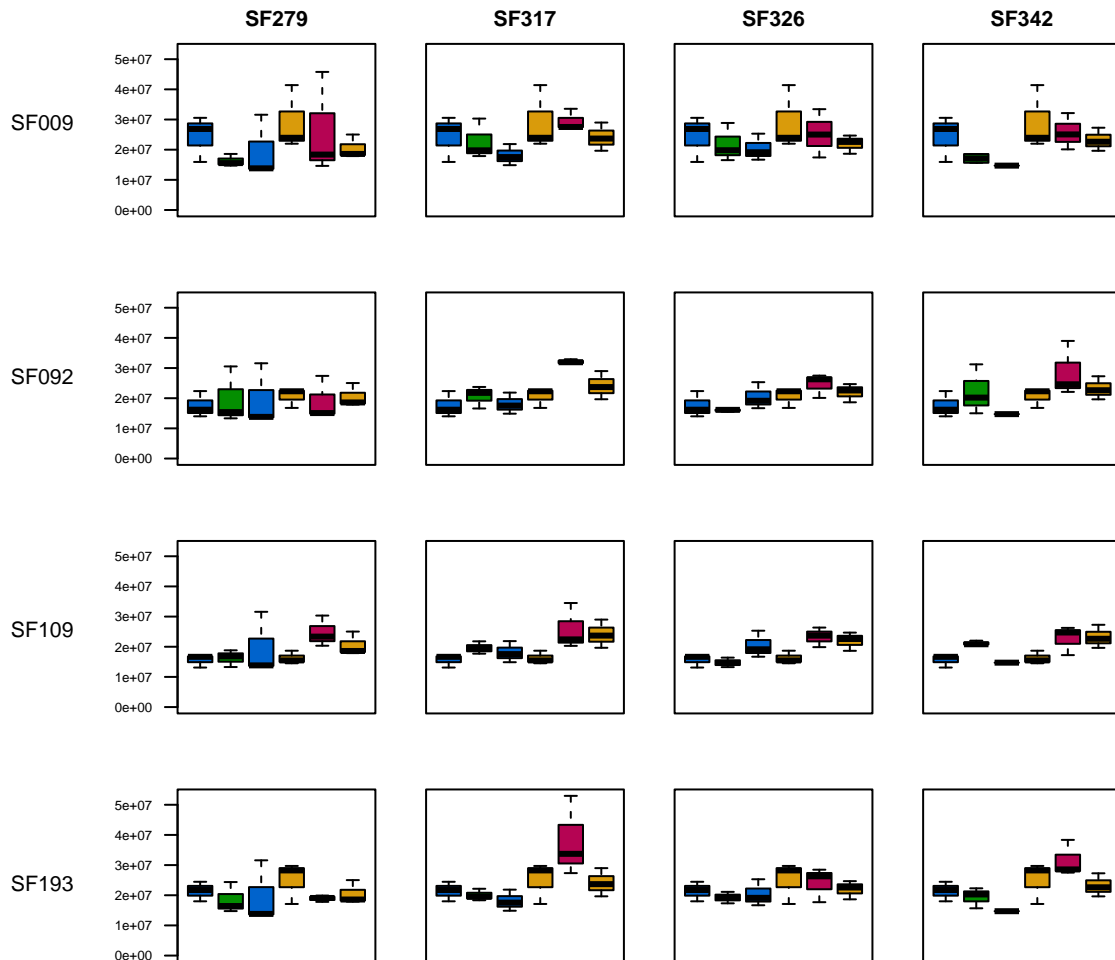

HanXRQChr05g0161541  
Probable fructose-1,6-bisphosphatase,  
cytosolic

Parents WW  
Parents WD  
Hybrids WW  
Hybrids WD

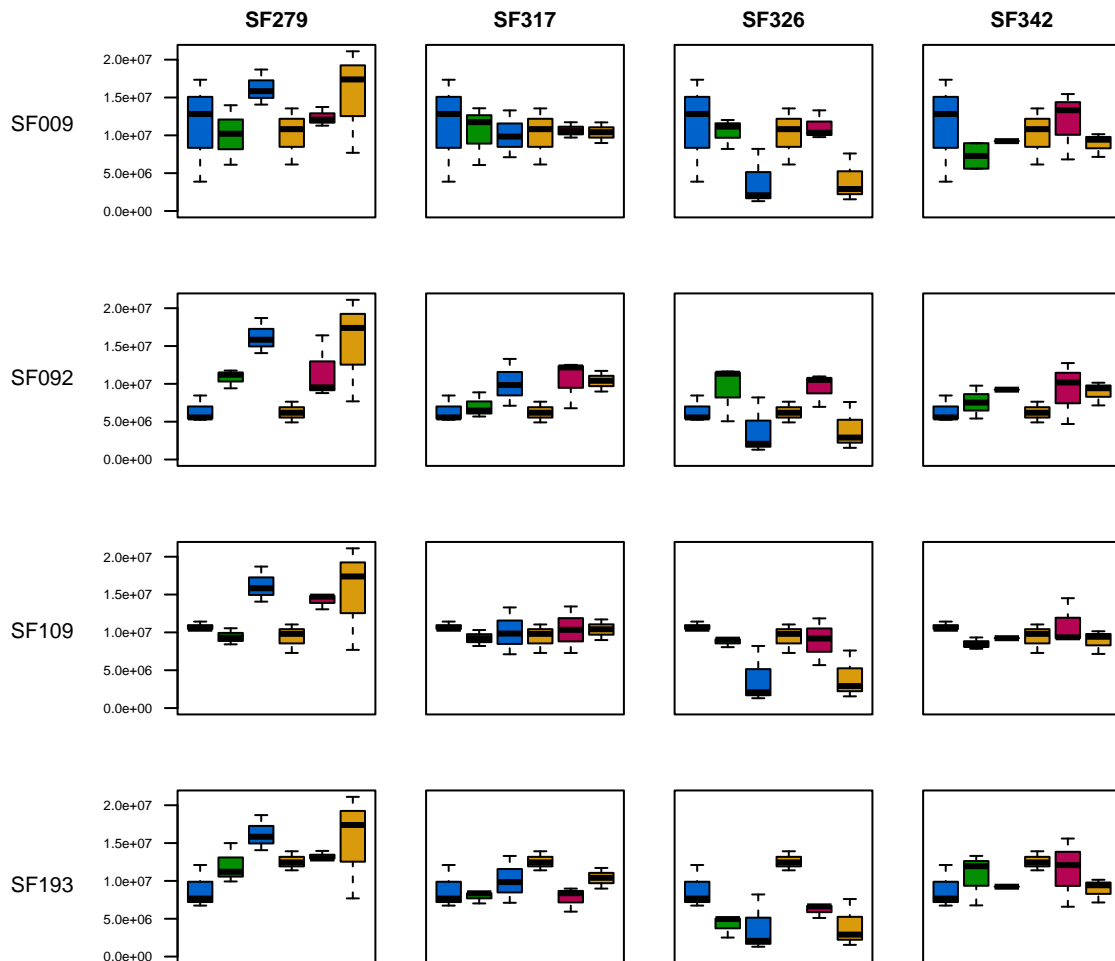

HanXRQChr10g0278581  
Probable ATP synthase delta-subunit gene

Parents WW  
Parents WD  
Hybrids WW  
Hybrids WD

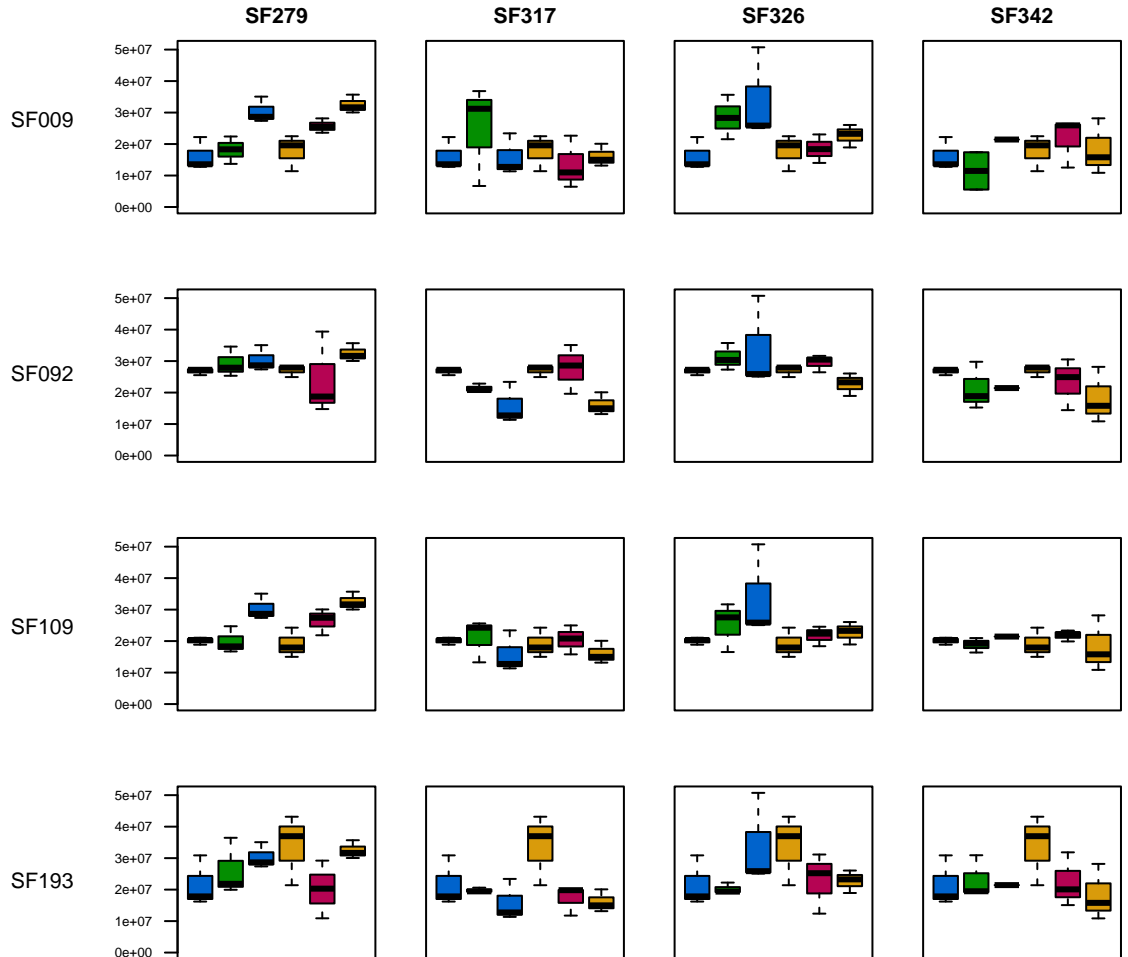

HanXRQChr07g0200311  
 Probable oxygen-evolving enhancer  
 protein 1, chloroplastic

Parents WW  
 Parents WD  
 Hybrids WW  
 Hybrids WD

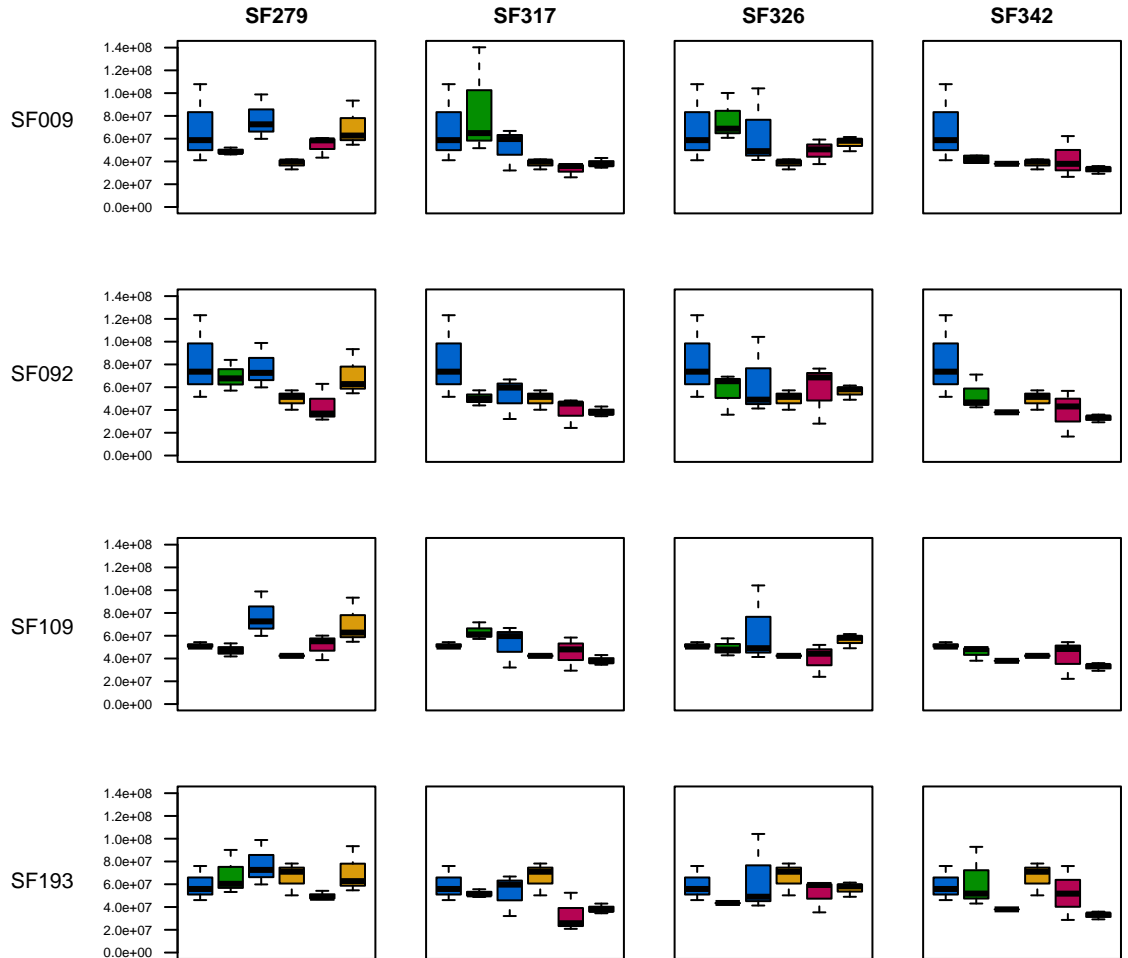

HanXRQChr04g0105241  
Probable rubredoxin family protein

Parents WW  
Parents WD  
Hybrids WW  
Hybrids WD

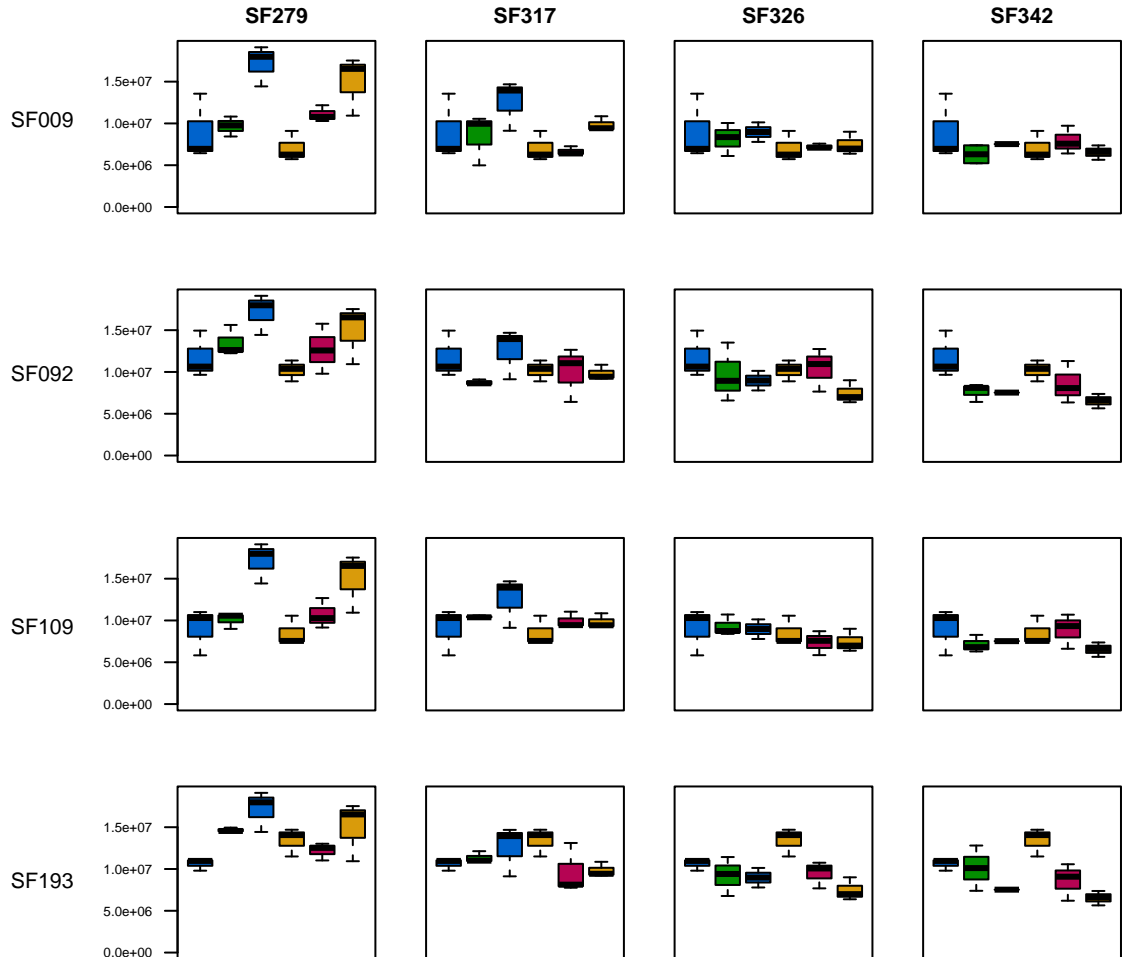

HanXRQChr01g0019741  
Probable protein tyrosine  
phosphatases;protein tyrosine phosphatase

Parents WW  
Parents WD  
Hybrids WW  
Hybrids WD

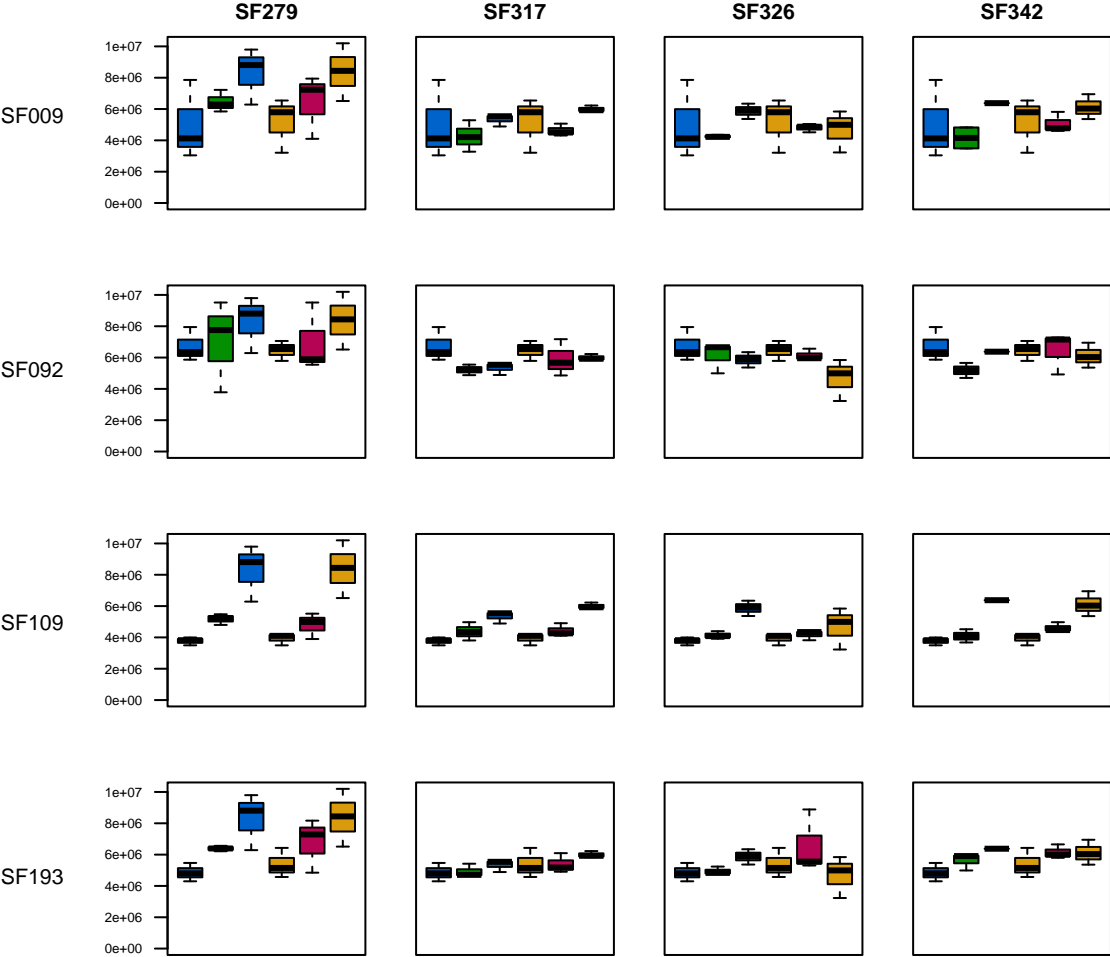

HanXRQChr16g0530311  
Putative FAD/NAD(P)-binding domain;  
Succinate dehydrogenase/fumarate reductase

Parents WW  
Parents WD  
Hybrids WW  
Hybrids WD

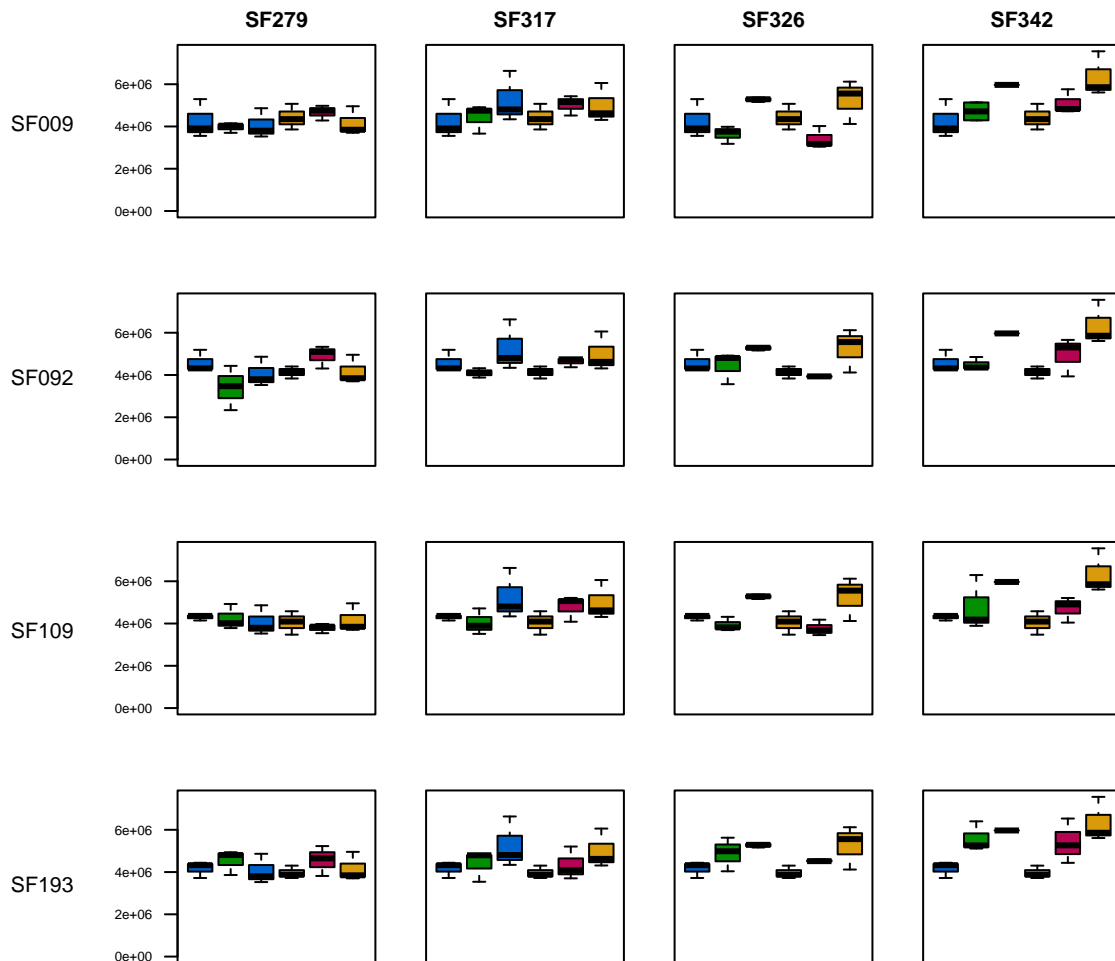



HanXRQChr01g0028101  
Putative pyruvate kinase; Pyruvate  
kinase-like, insert domain

Parents WW  
Parents WD  
Hybrids WW  
Hybrids WD

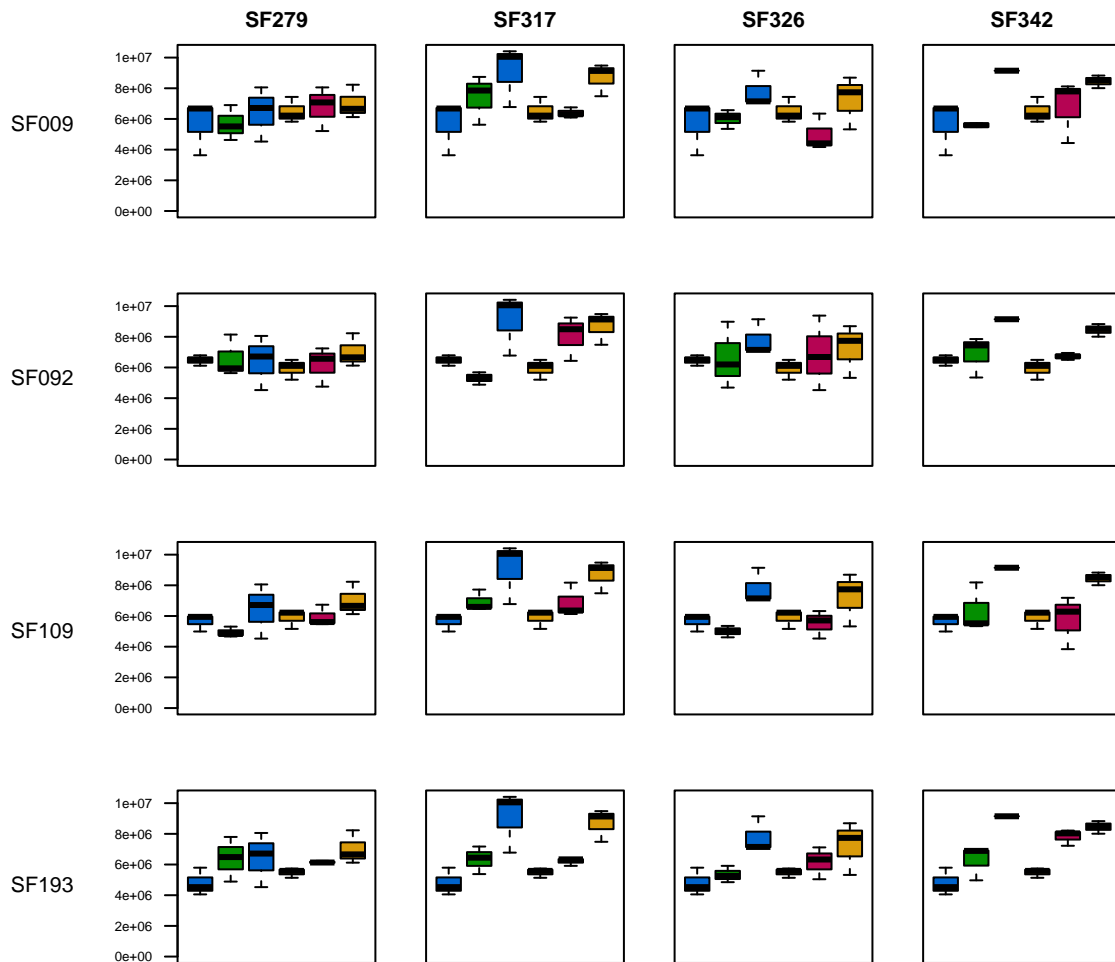

HanXRQChr15g0478121  
Putative porin domain; Eukaryotic  
porin/Tom40

Parents WW  
Parents WD  
Hybrids WW  
Hybrids WD

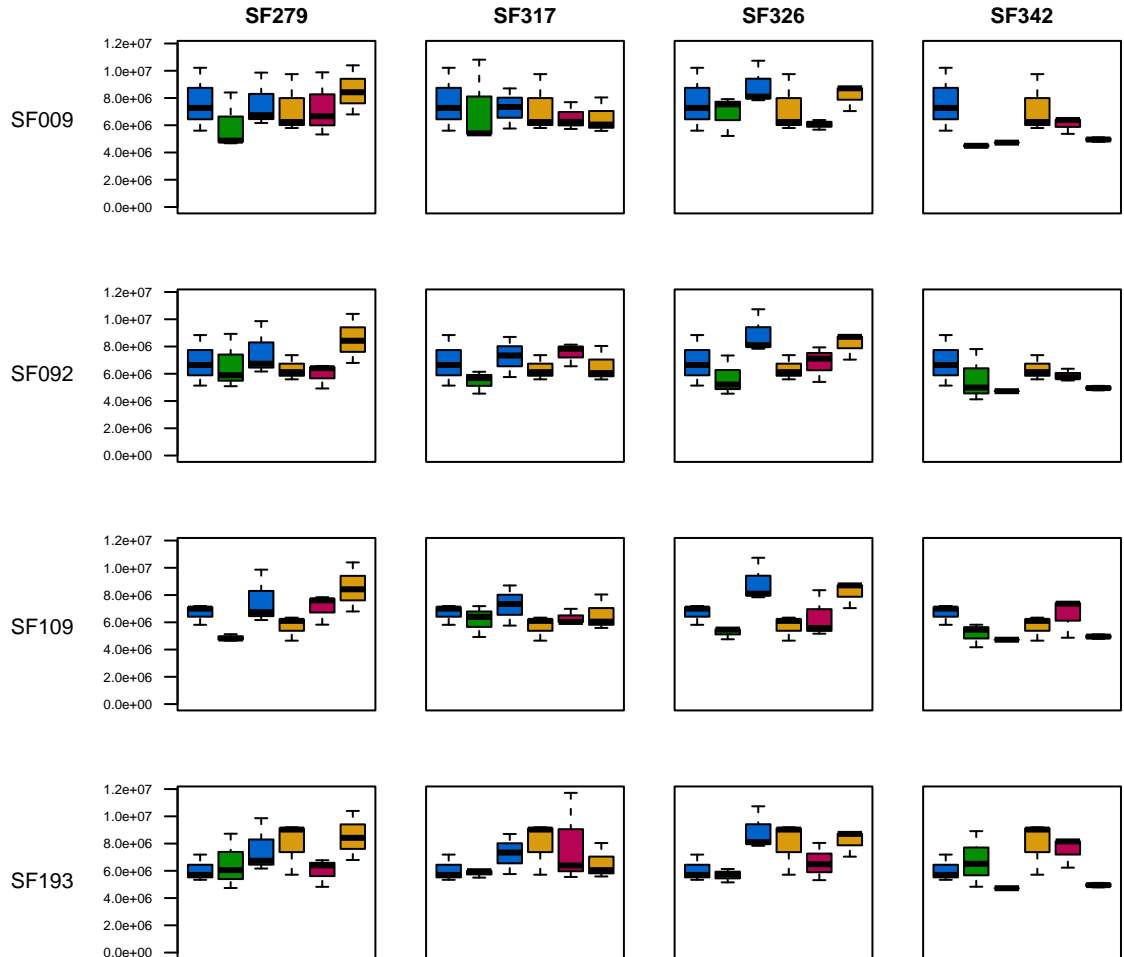

HanXRQChr11g0335611  
Putative phosphoglycerate kinase

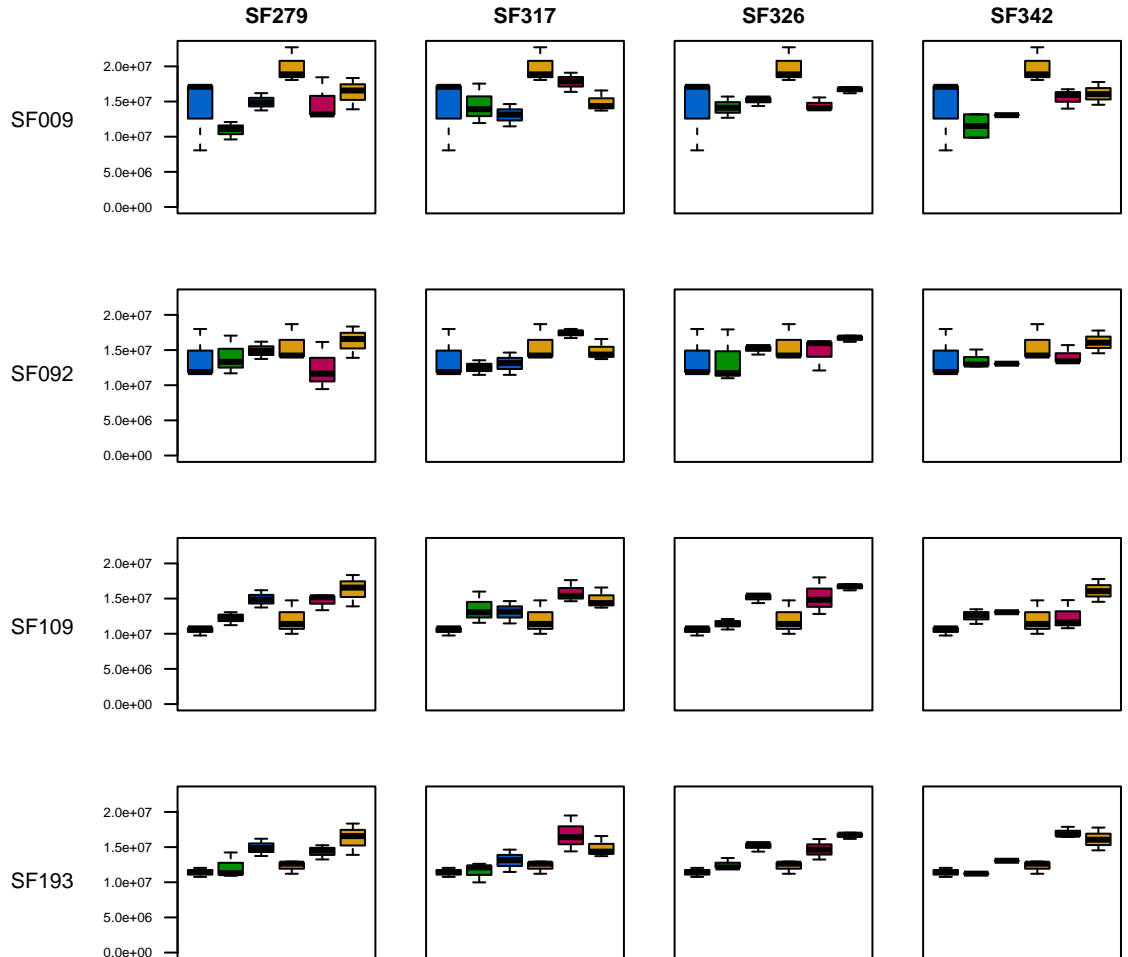

HanXRQChr04g0107531  
Probable ribosomal protein L21

Parents WW  
Parents WD  
Hybrids WW  
Hybrids WD

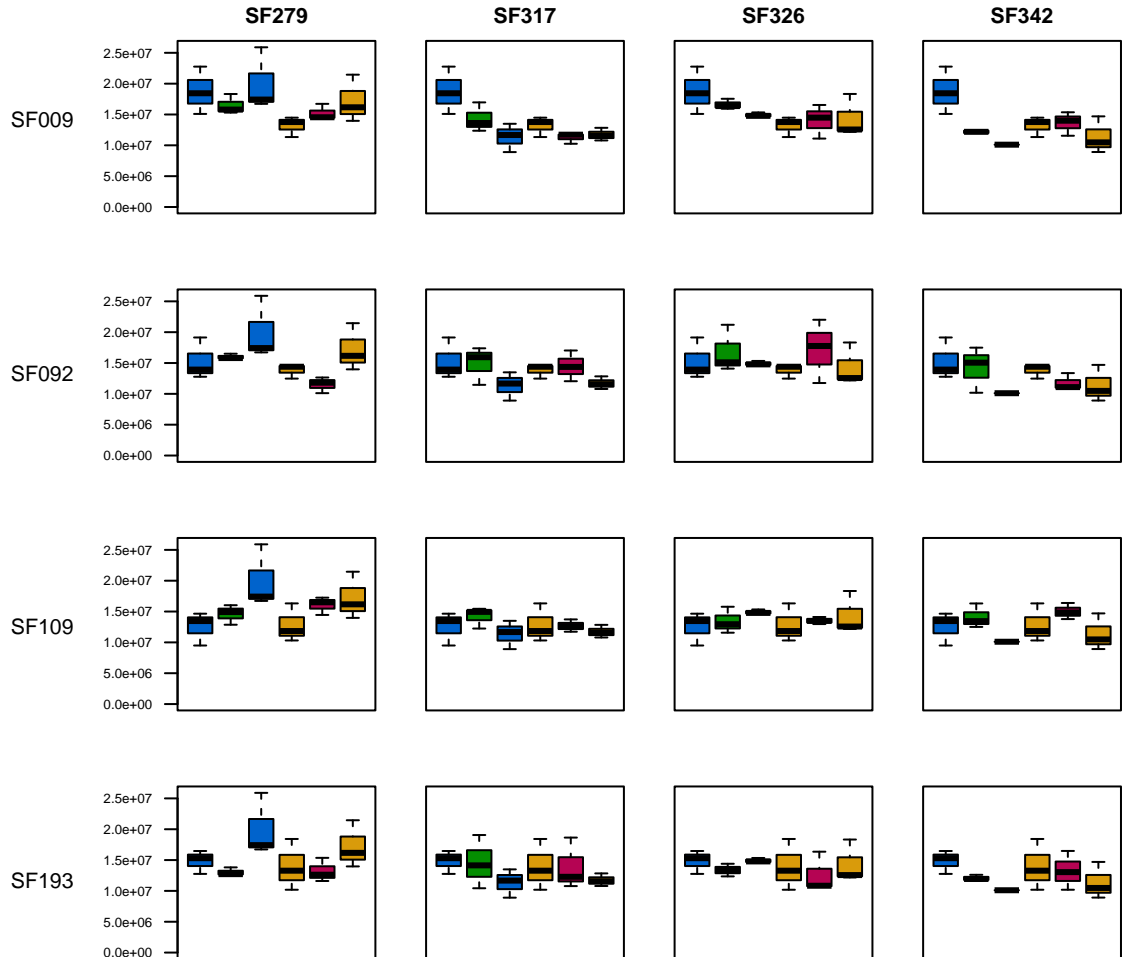

HanXRQChr01g0010651  
Probable plastid transcriptionally  
active 16

Parents WW  
Parents WD  
Hybrids WW  
Hybrids WD

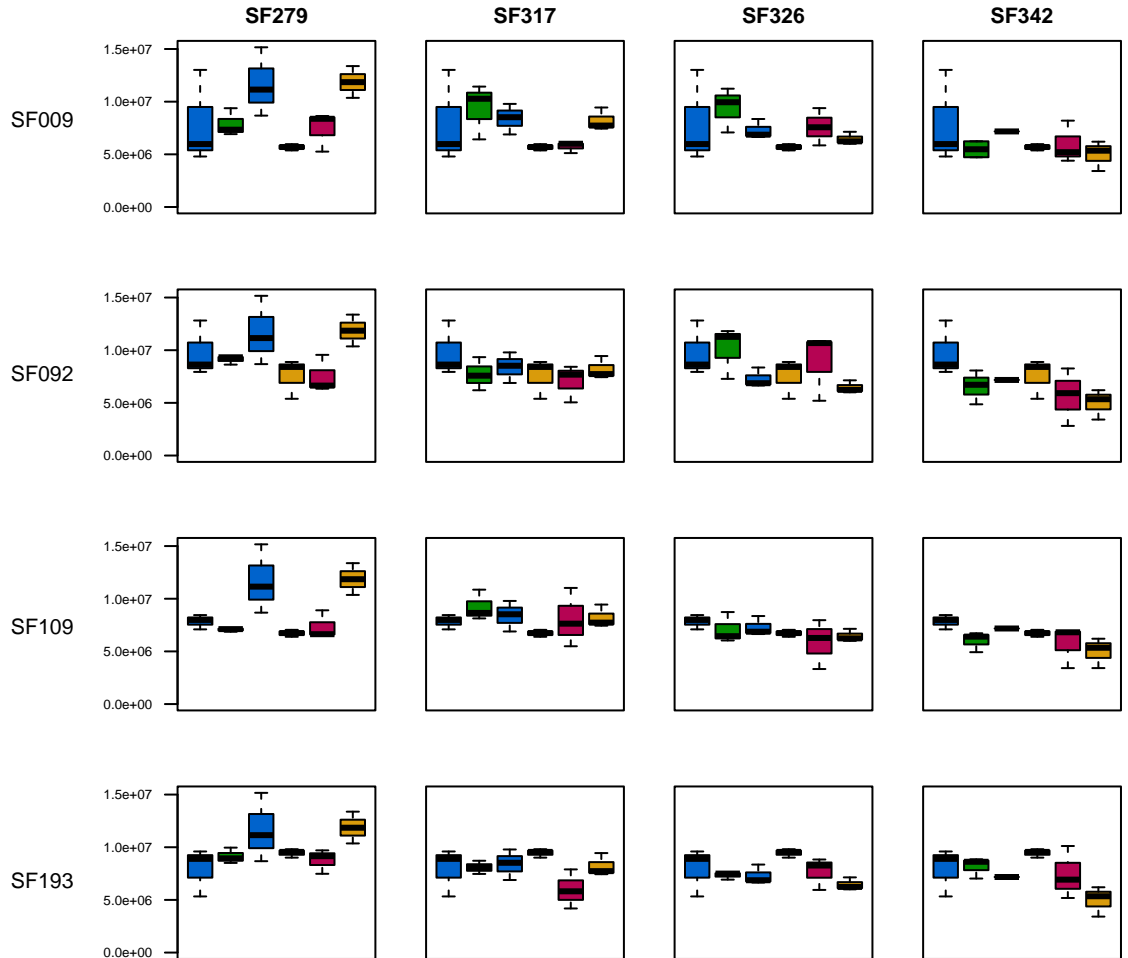

HanXRQChr03g0091711  
Probable protein argonaute 16

Parents WW  
Parents WD  
Hybrids WW  
Hybrids WD

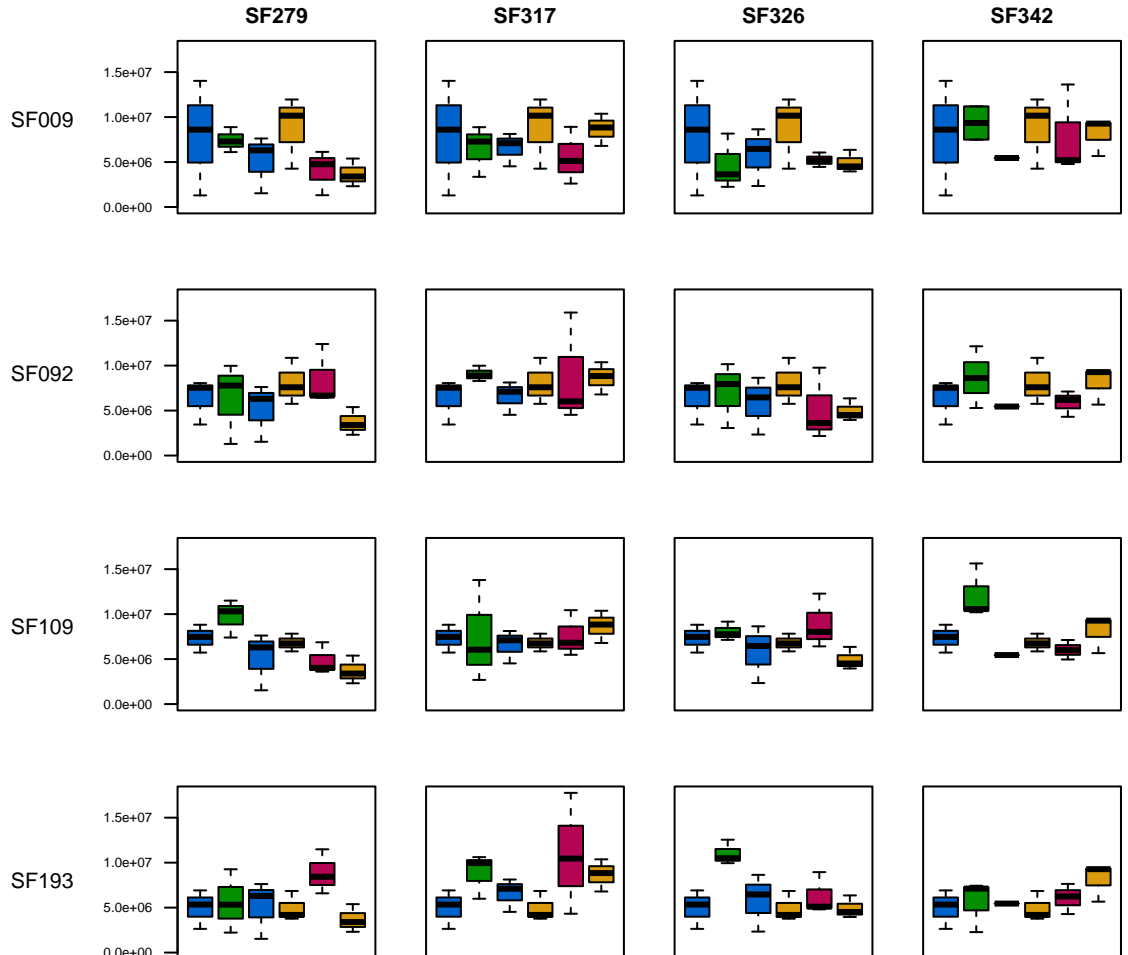

HanXRQChr12g0381201  
Probable alanine:glyoxylate  
aminotransferase

Parents WW  
Parents WD  
Hybrids WW  
Hybrids WD

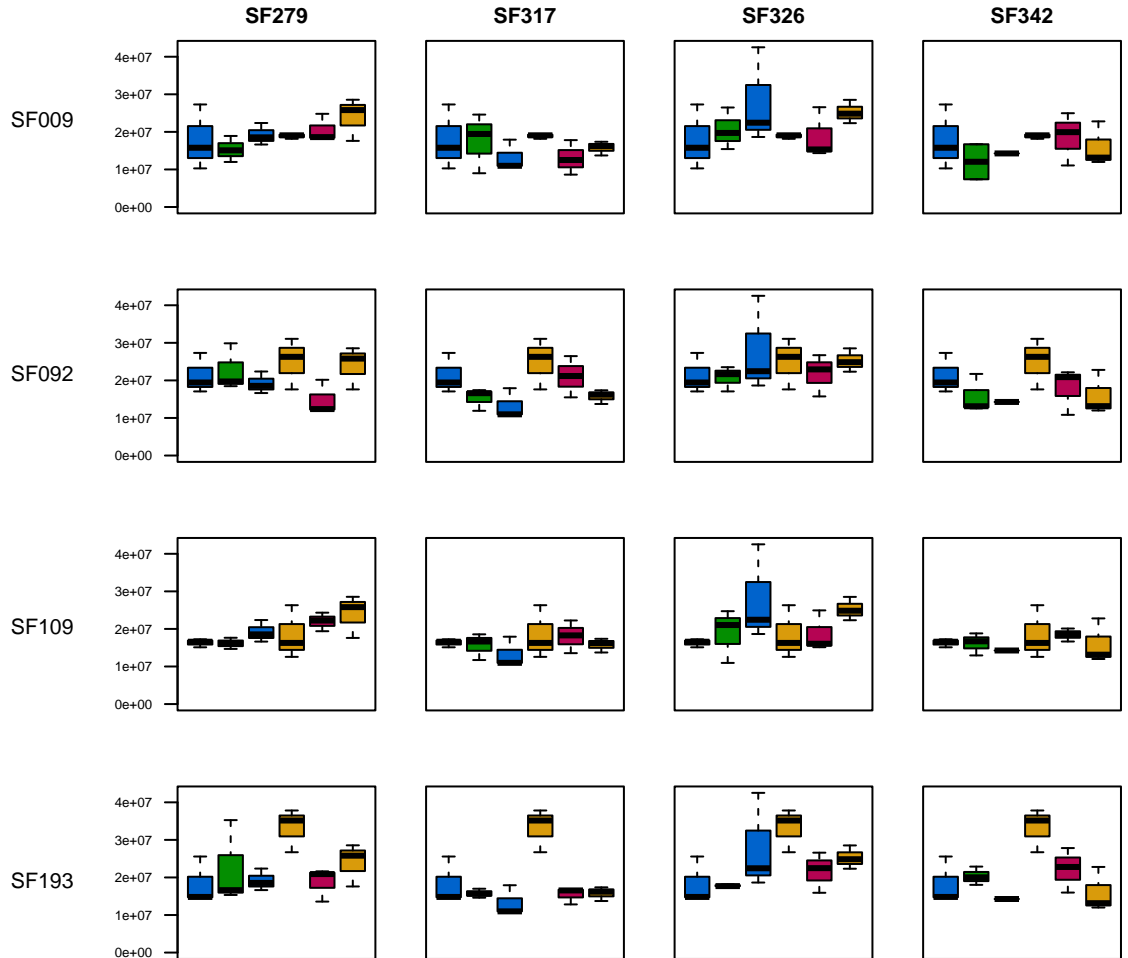

HanXRQChr16g0498371  
Putative aminotransferase class-III;  
Pyridoxal phosphate-dependent transferase

Parents WW  
Parents WD  
Hybrids WW  
Hybrids WD

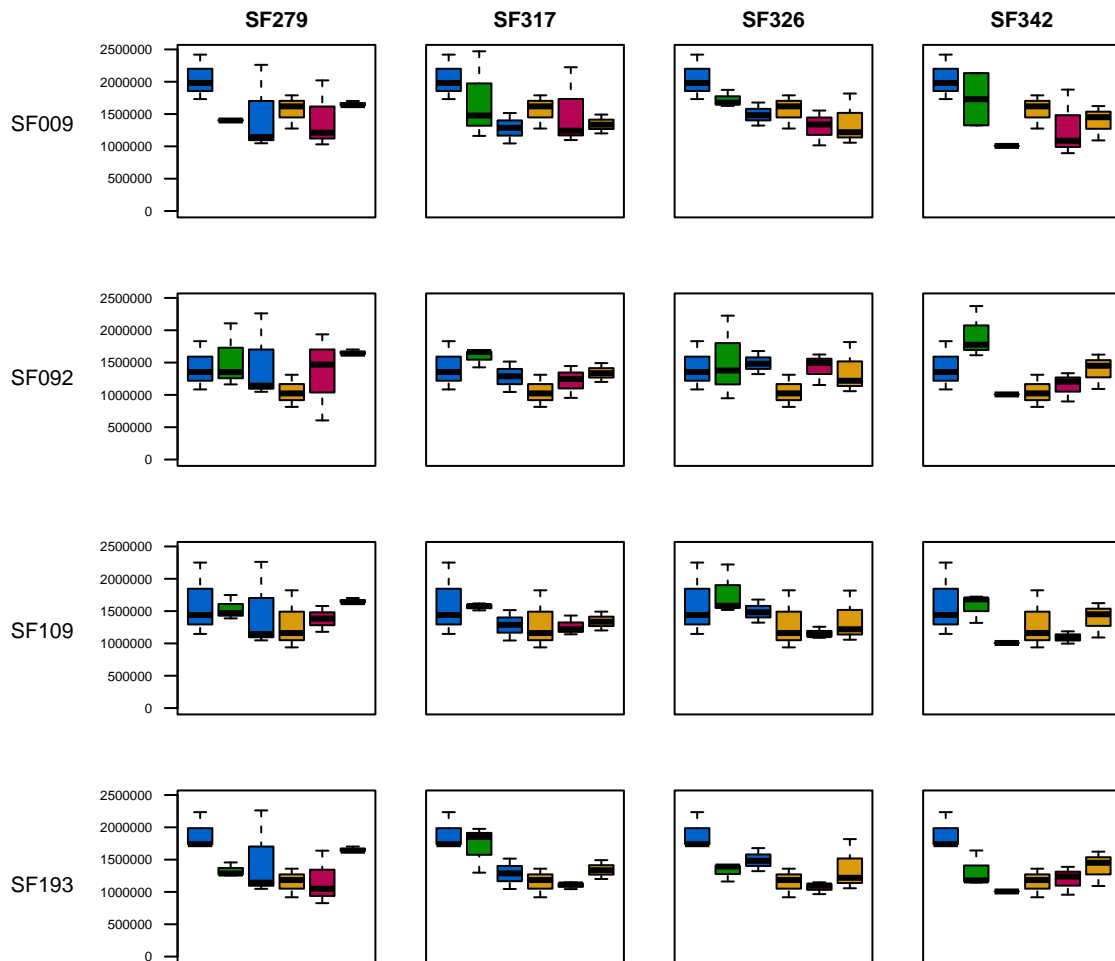



HanXRQChr09g0273191  
Probable acetolactate synthase 1,  
chloroplastic

Parents WW  
Parents WD  
Hybrids WW  
Hybrids WD

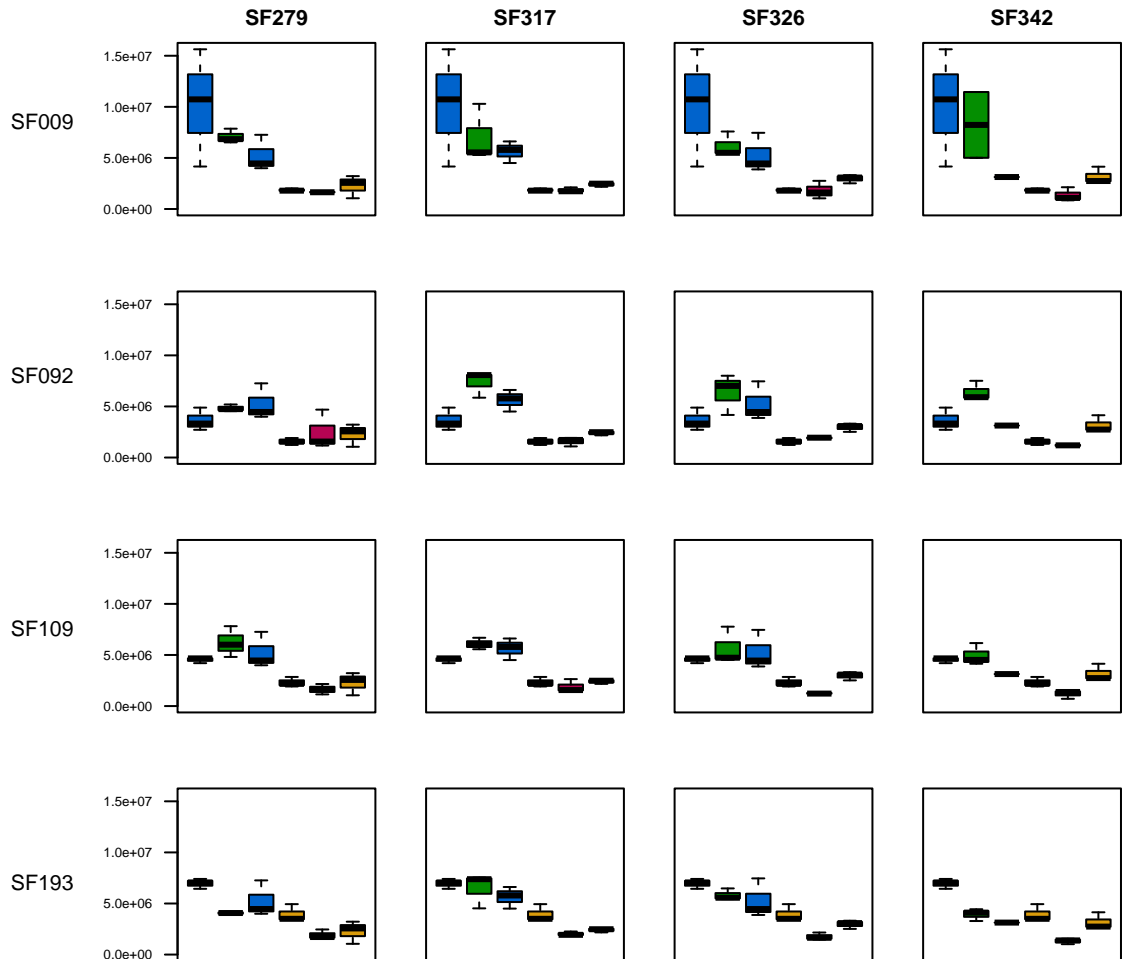

HanXRQChr17g0542591  
Putative twin-arginine translocation  
pathway, signal sequence; Photosystem II F

Parents WW  
Parents WD  
Hybrids WW  
Hybrids WD

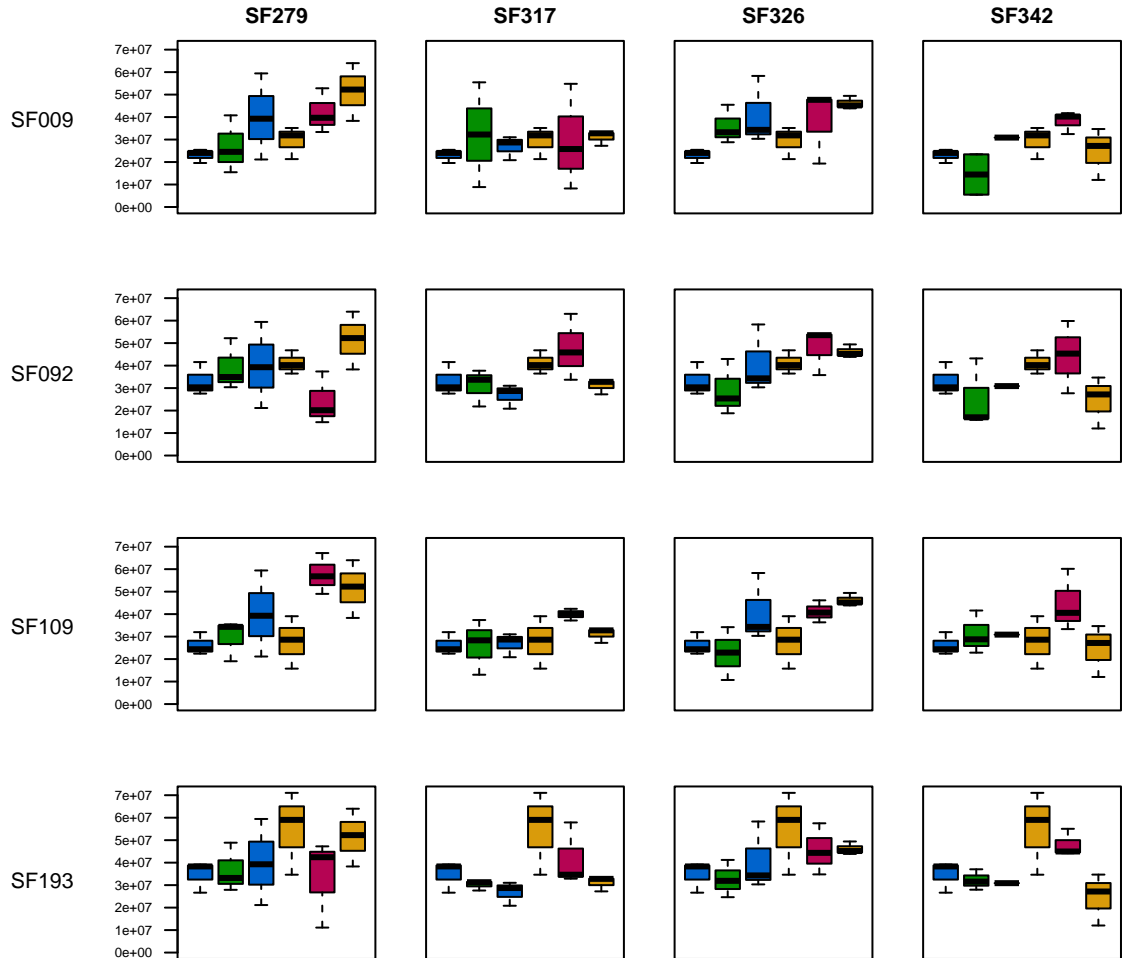

HanXRQChr12g0359601  
Probable peroxiredoxin IIF

- Parents WW
- Parents WD
- Hybrids WW
- Hybrids WD

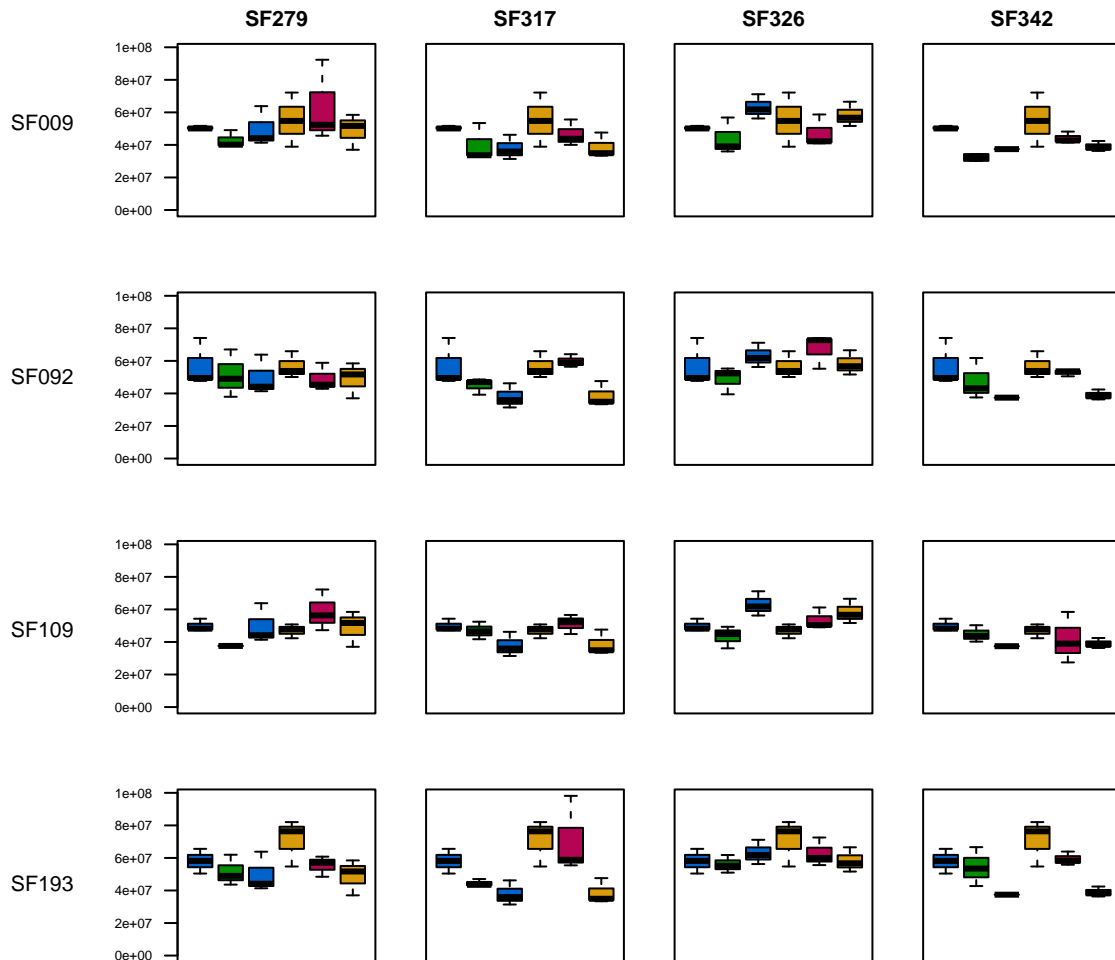

HanXRQChr05g0139861  
Putative granulin; Peptidase C1A;  
Cysteine peptidase, histidine active site

Parents WW  
Parents WD  
Hybrids WW  
Hybrids WD

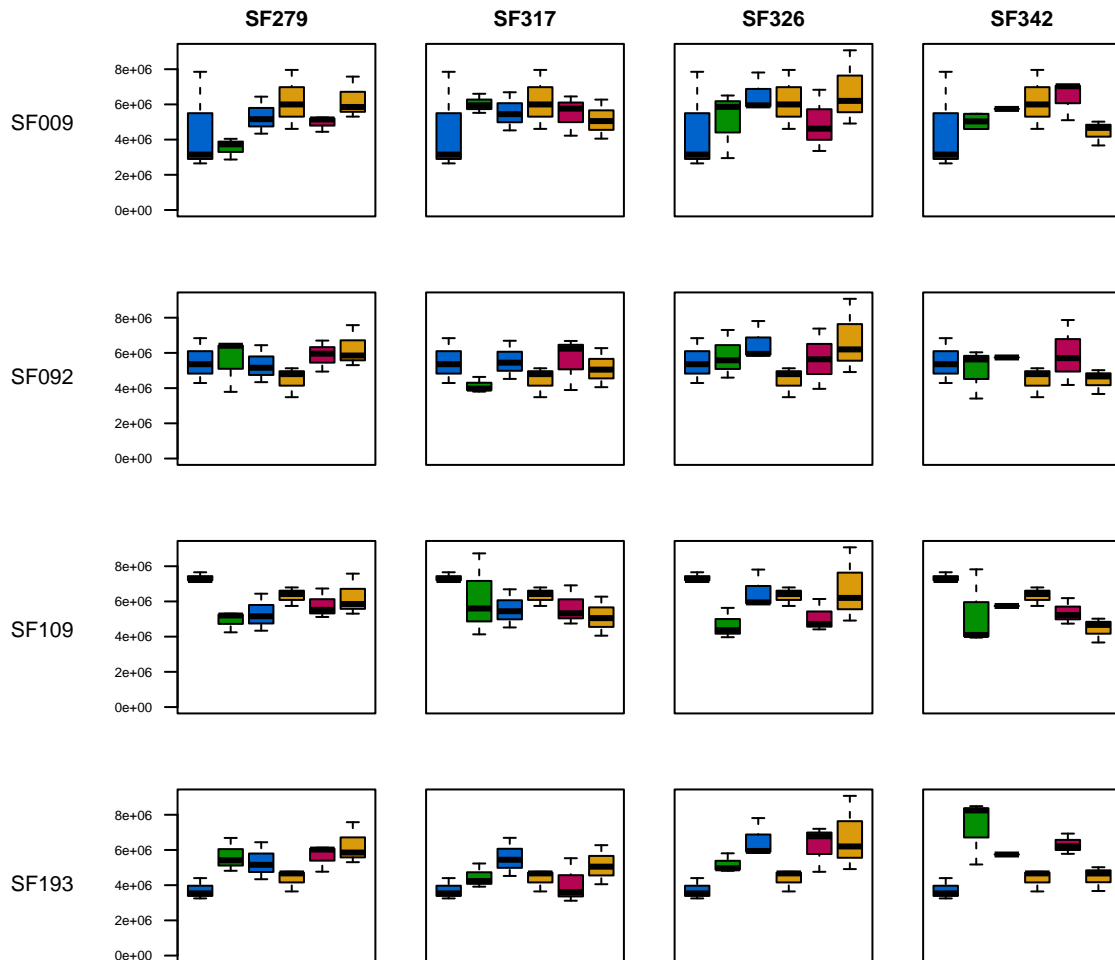

HanXRQChr02g0040571  
Probable adenylate kinase 2,  
chloroplastic

Parents WW  
Parents WD  
Hybrids WW  
Hybrids WD

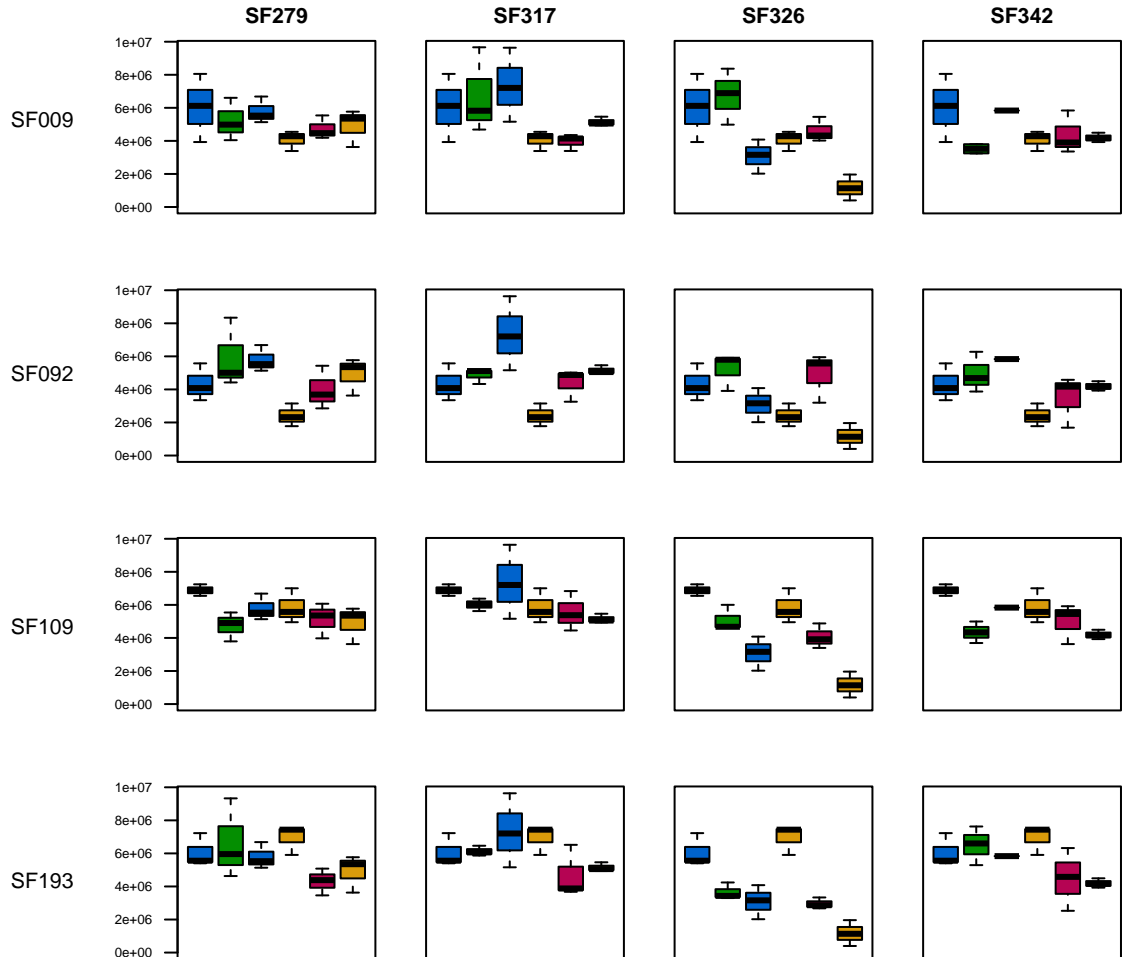

HanXRQChr07g0190181  
Probable glutamate decarboxylase

- Parents WW
- Parents WD
- Hybrids WW
- Hybrids WD

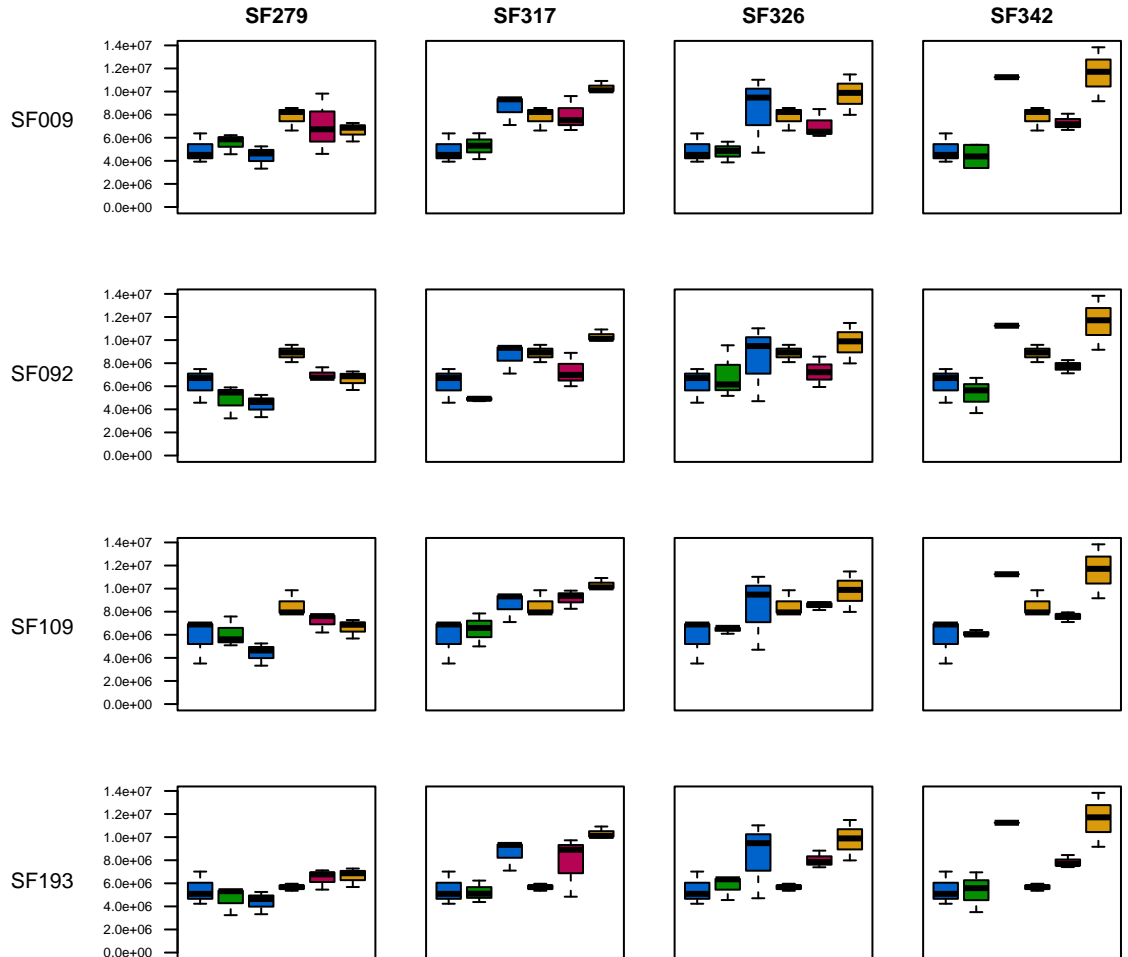

HanXRQChr01g0006791  
Uncharacterized protein, supported by  
expression data

Parents WW  
Parents WD  
Hybrids WW  
Hybrids WD

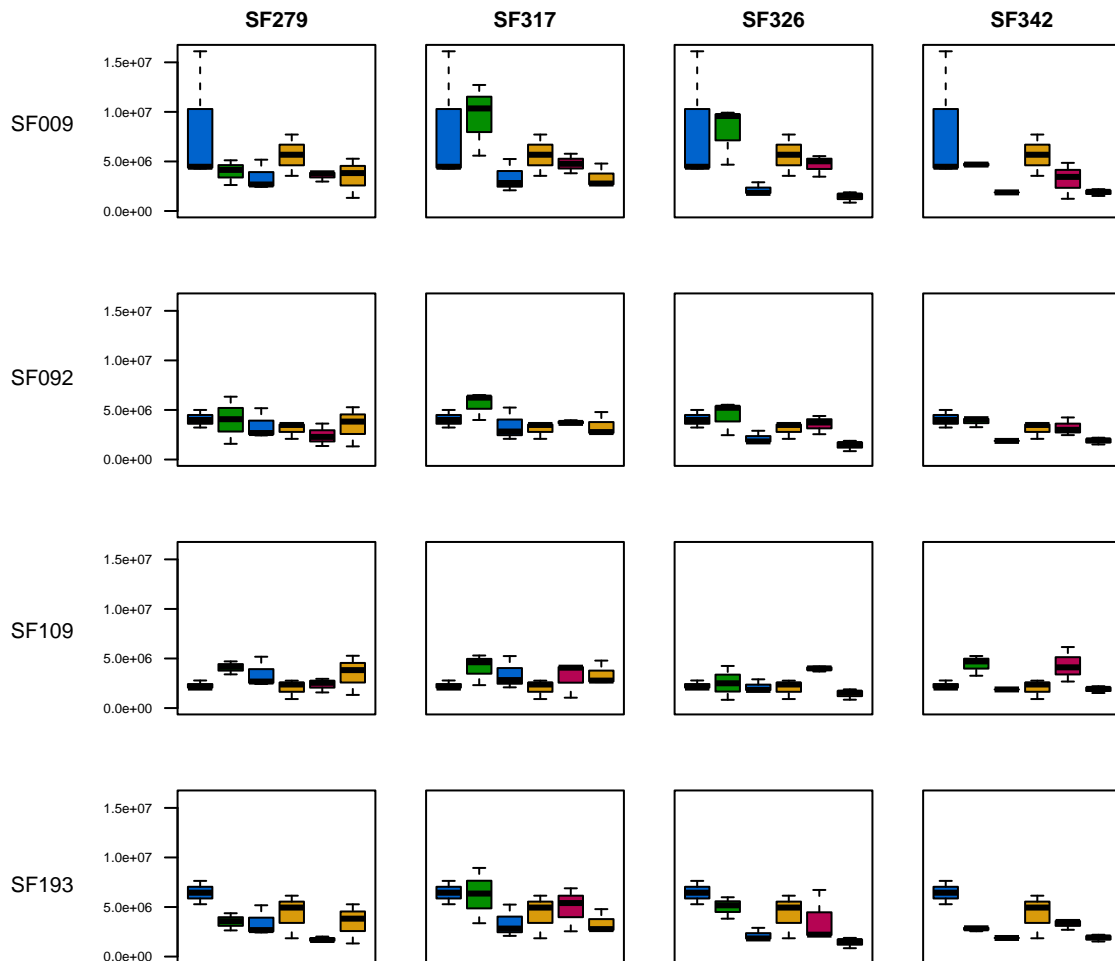

HanXRQChr11g0338881  
Probable Xaa-Pro aminopeptidase P

Parents WW  
Parents WD  
Hybrids WW  
Hybrids WD

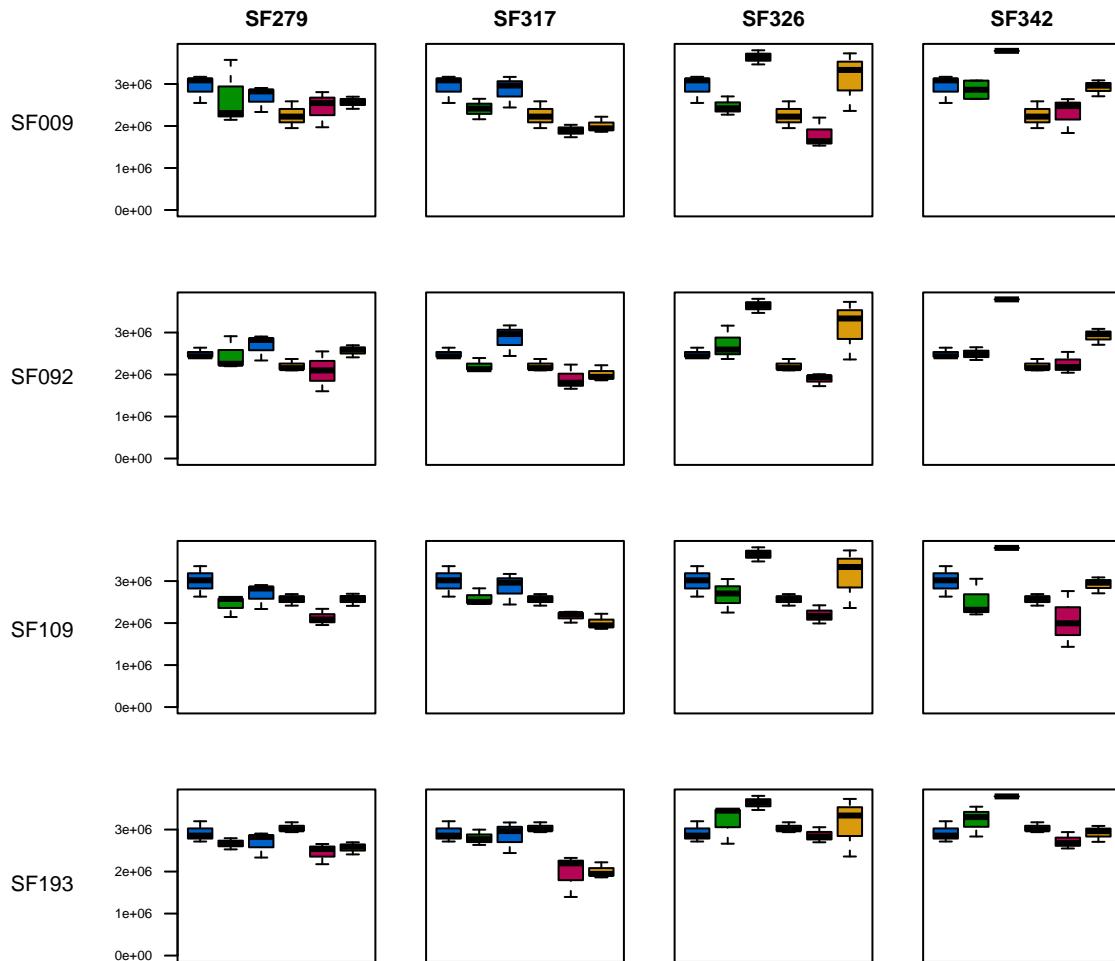



HanXRQChr15g0491891  
Uncharacterized conserved protein

- Parents WW
- Parents WD
- Hybrids WW
- Hybrids WD

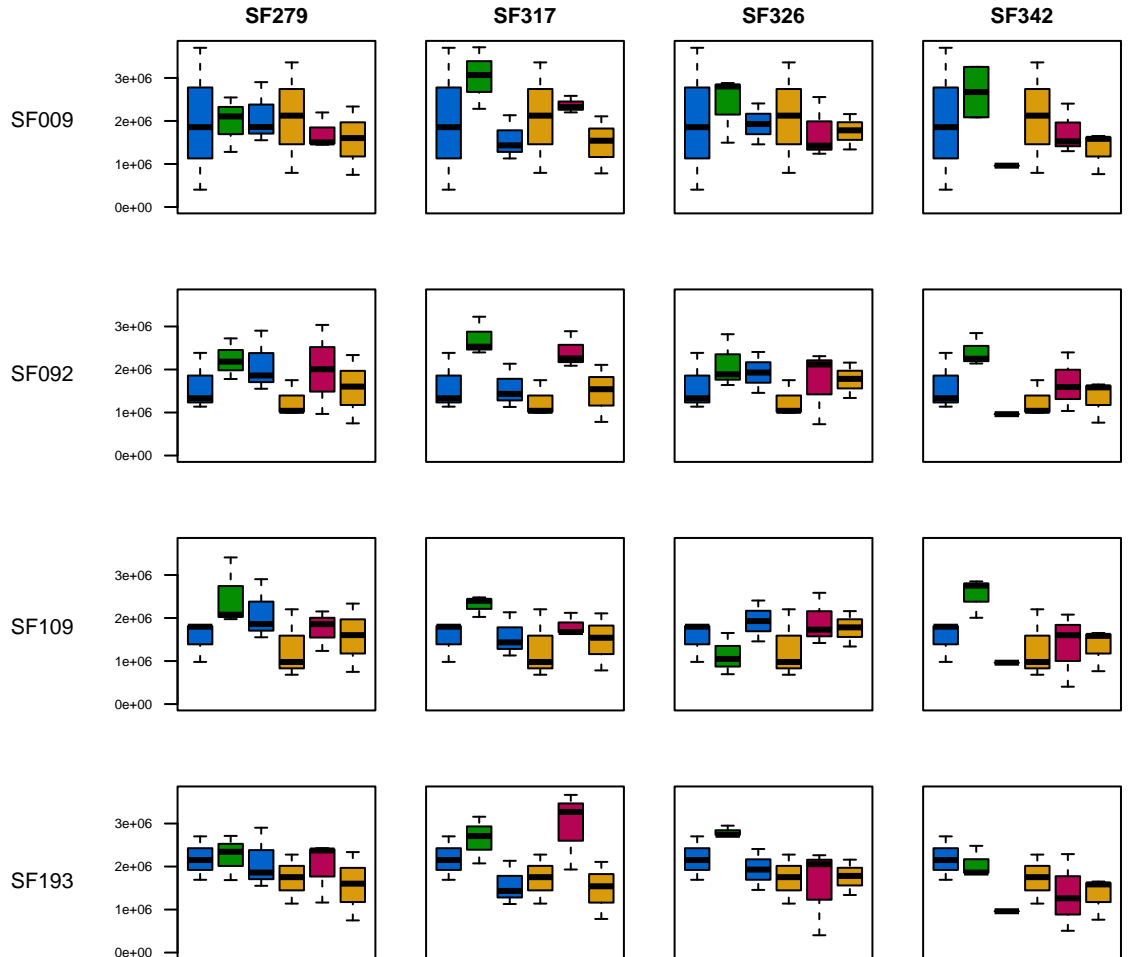

HanXRQChr09g0250351  
 Probable aluminium induced protein with  
 YGL and LRDR motifs

Parents WW  
 Parents WD  
 Hybrids WW  
 Hybrids WD

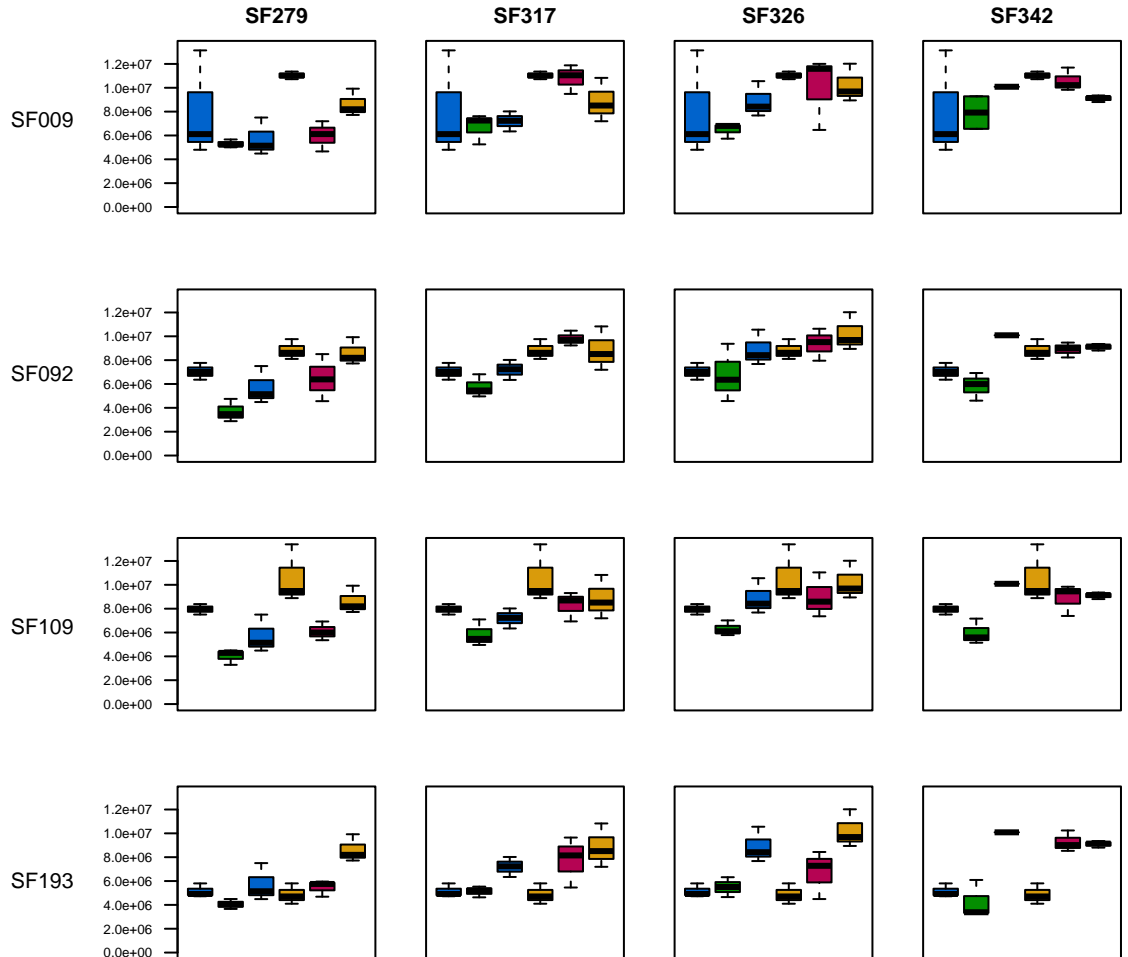

HanXRQChr08g0219051  
Probable chlorophyll a-b binding  
protein 6A, chloroplastic

Parents WW  
Parents WD  
Hybrids WW  
Hybrids WD

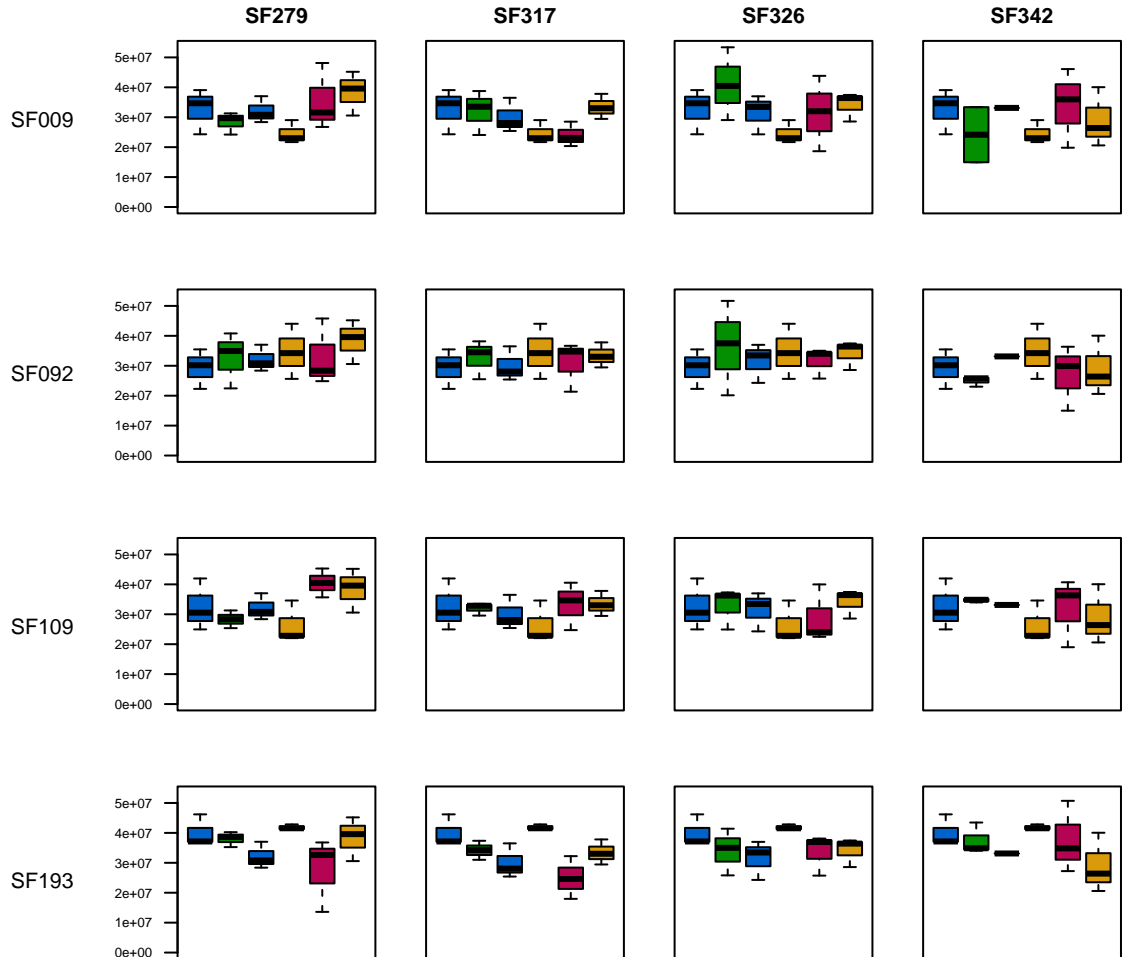

HanXRQChr05g0153021  
Probable nucleotide-diphospho-sugar  
transferases superfamily protein

Parents WW  
Parents WD  
Hybrids WW  
Hybrids WD

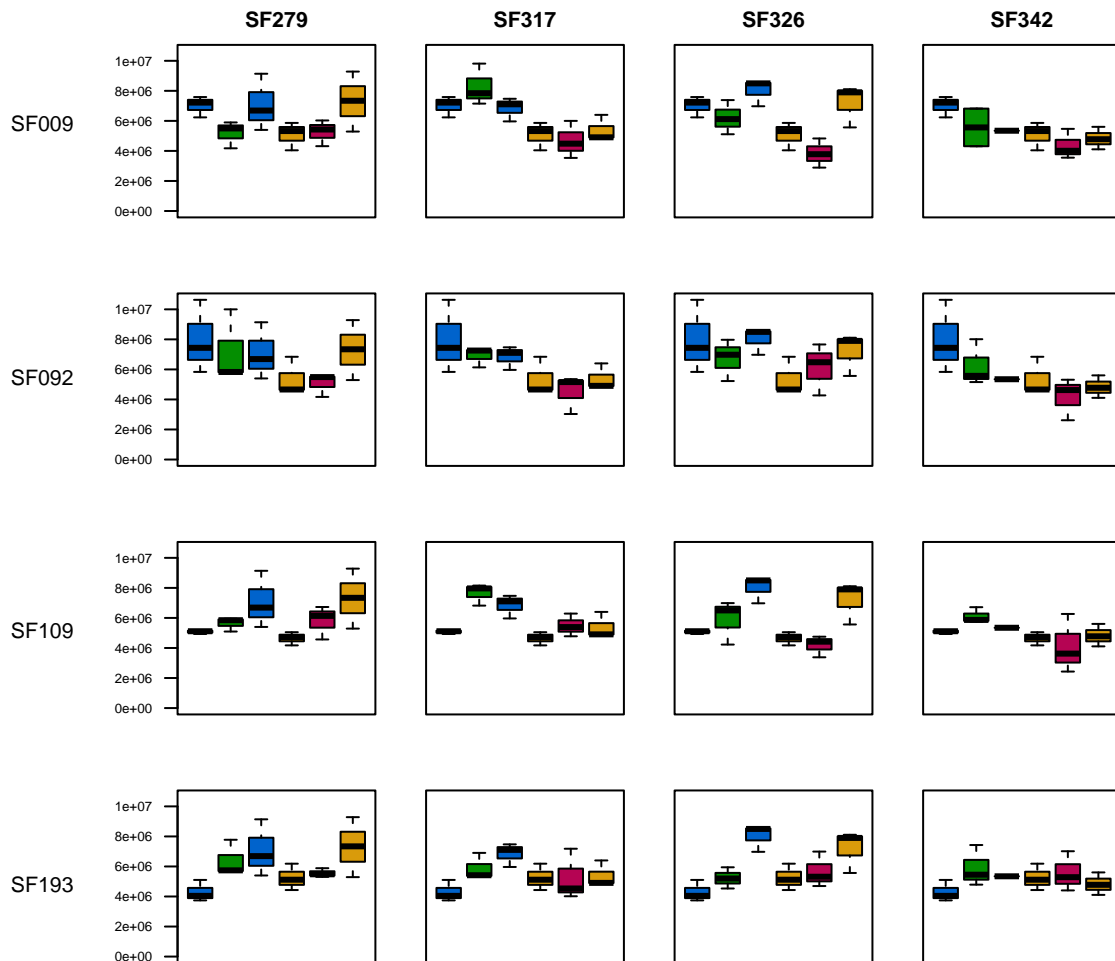

HanXRQChr14g0428751  
Probable ATP-dependent zinc  
metalloprotease FTSH, chloroplastic

Parents WW  
Parents WD  
Hybrids WW  
Hybrids WD

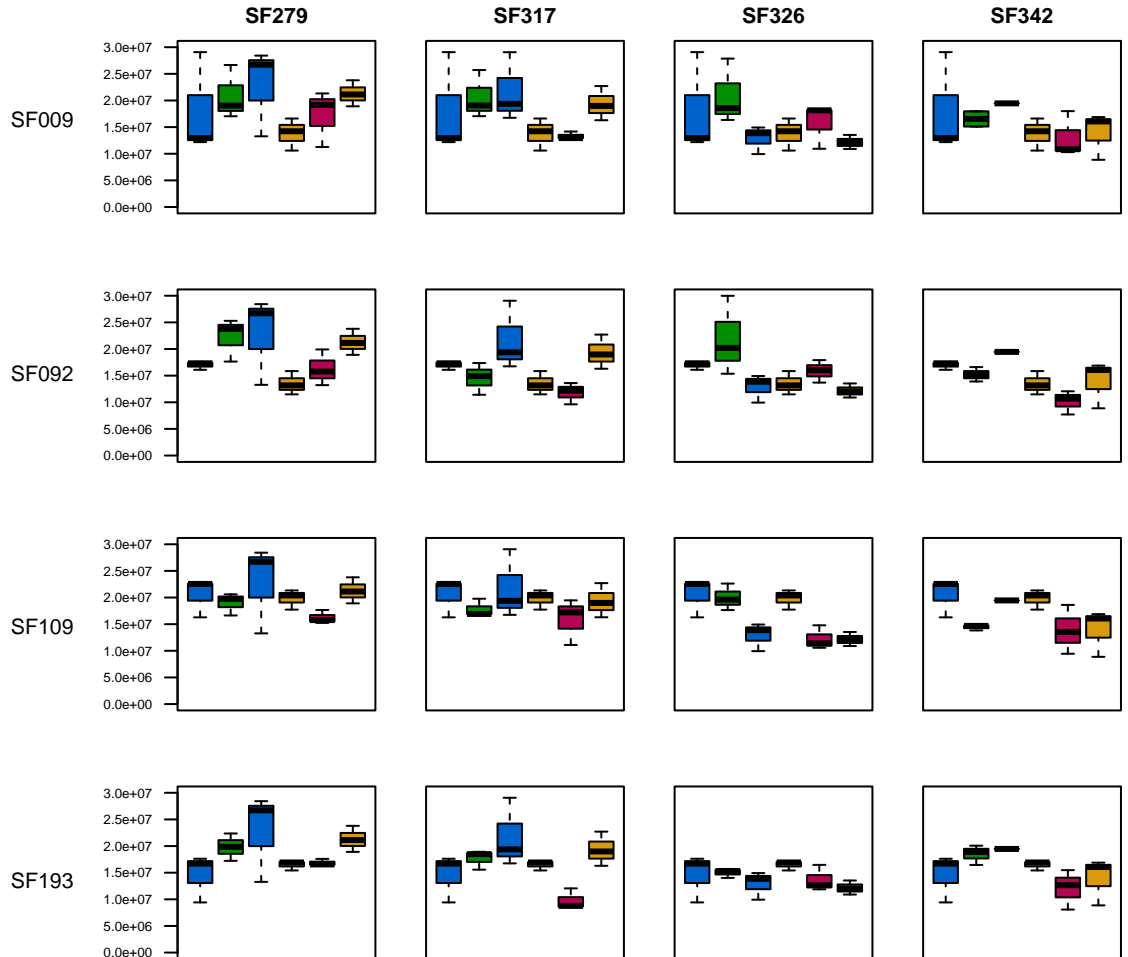

HanXRQChr04g0125411  
Probable NAD(P)-linked oxidoreductase  
superfamily protein

Parents WW  
Parents WD  
Hybrids WW  
Hybrids WD

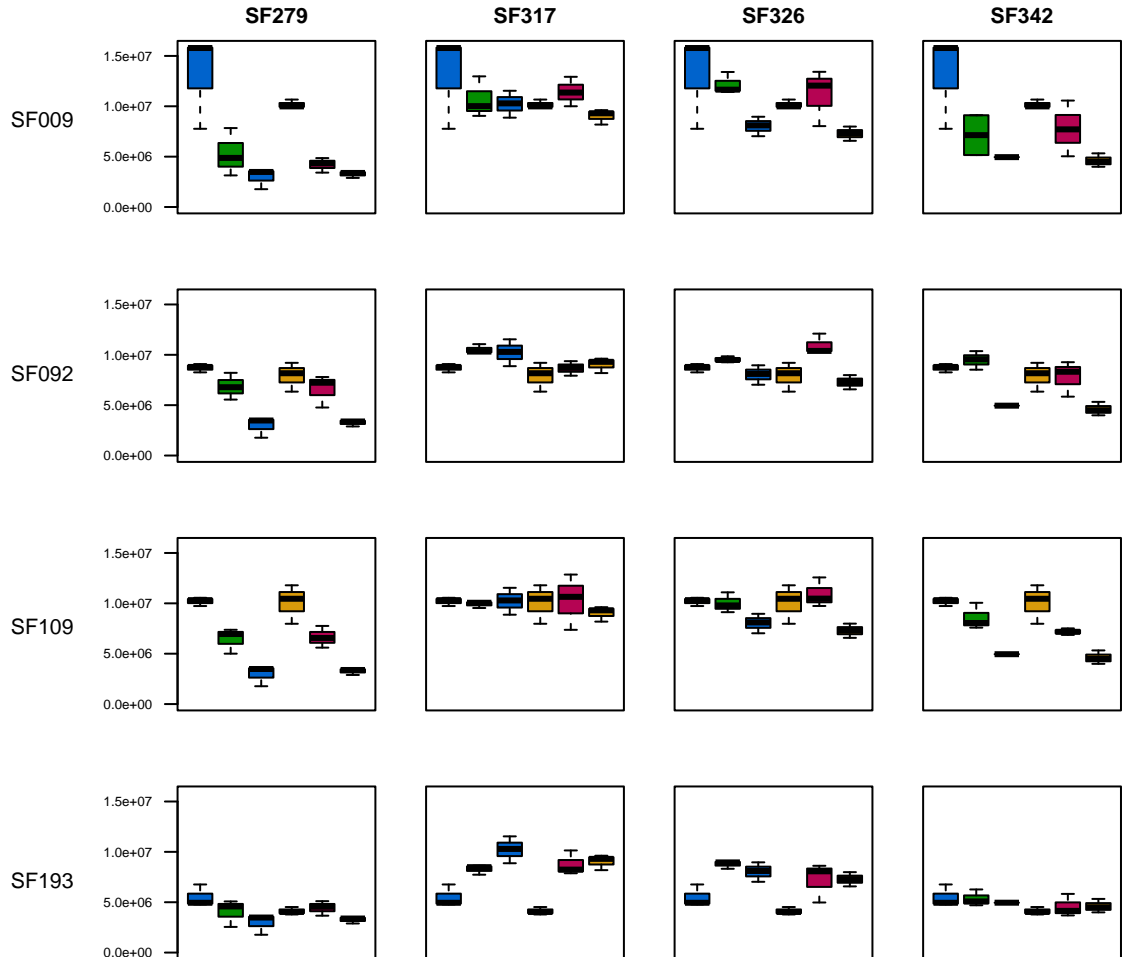

HanXRQChr16g0500271  
Probable plastid transcriptionally  
active 17

Parents WW  
Parents WD  
Hybrids WW  
Hybrids WD

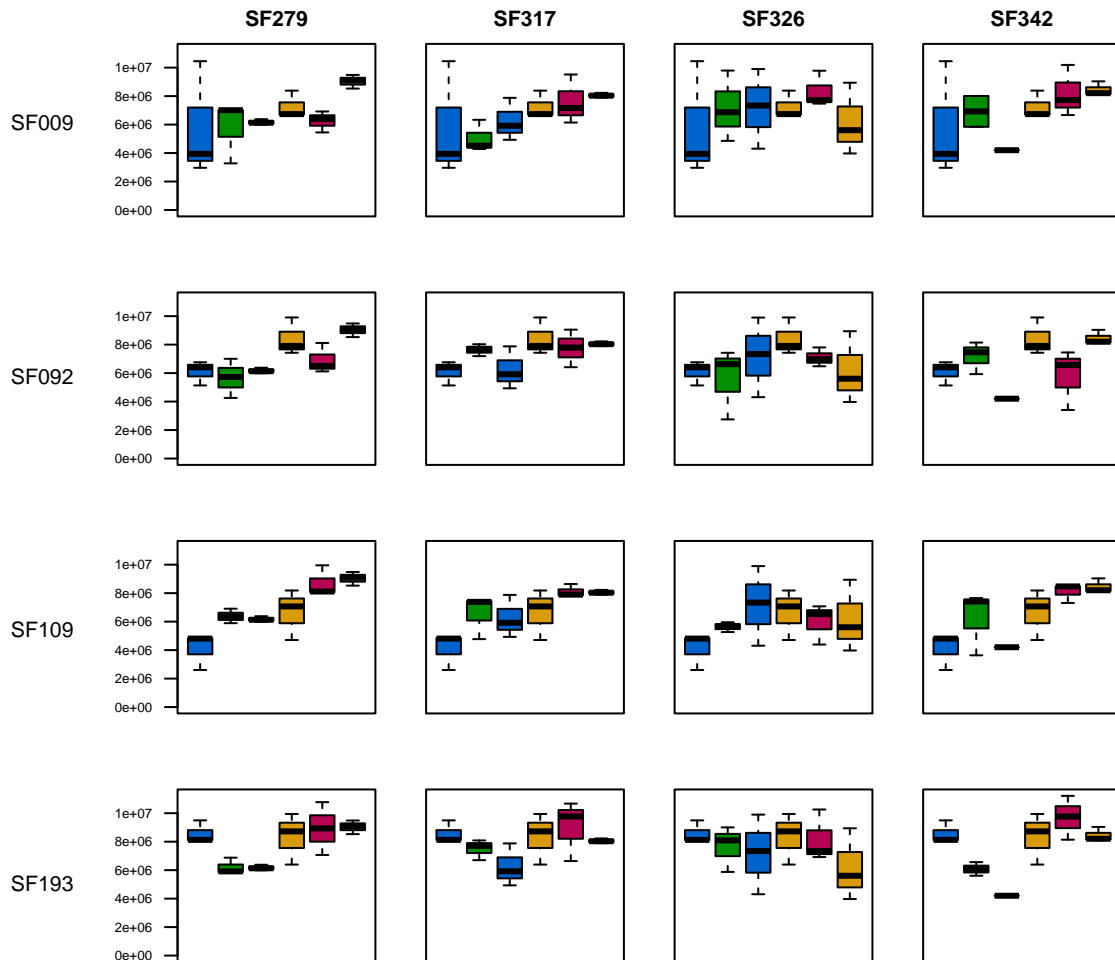

HanXRQChr15g0479151  
Probable peroxidase superfamily protein

- Parents WW
- Parents WD
- Hybrids WW
- Hybrids WD

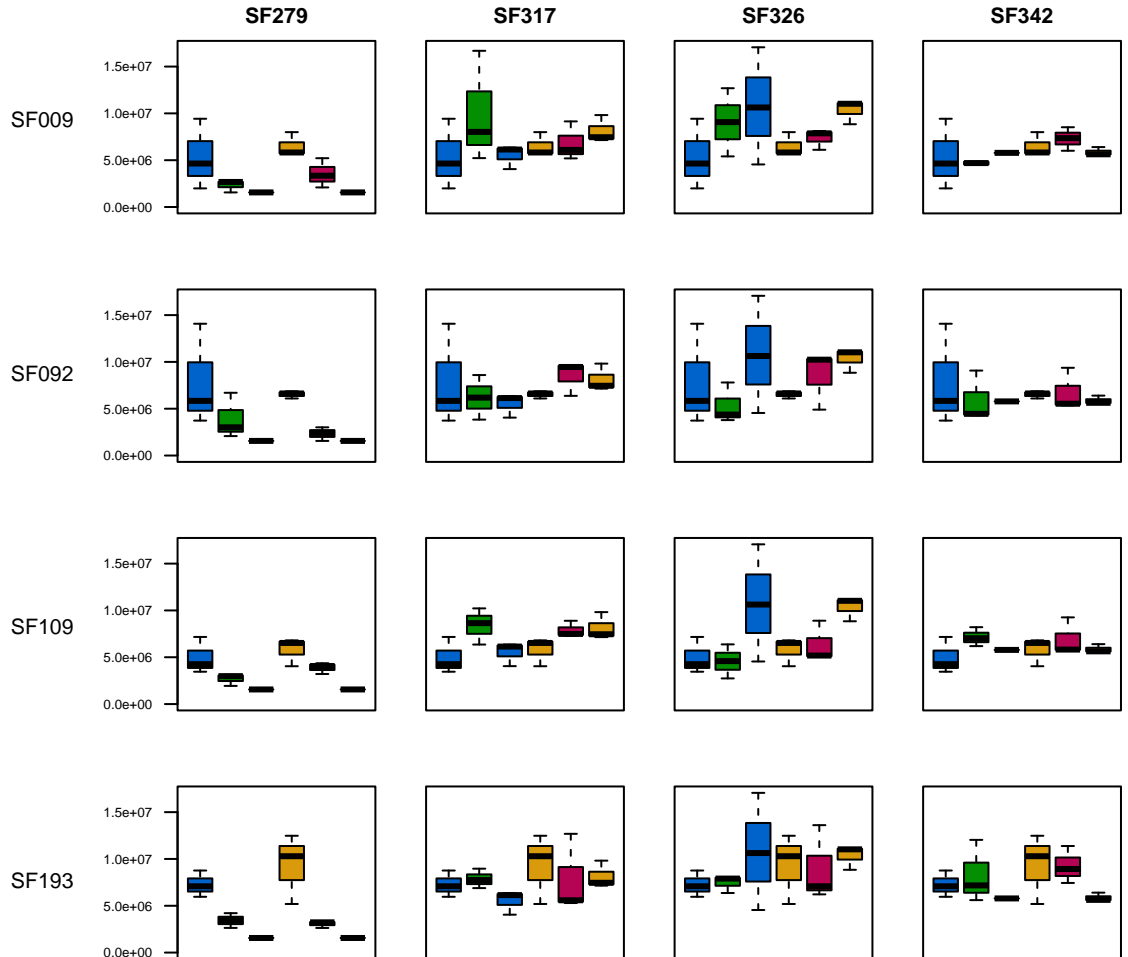



HanXRQChr08g0220511  
Putative NAD(P)-binding domain

- Parents WW
- Parents WD
- Hybrids WW
- Hybrids WD

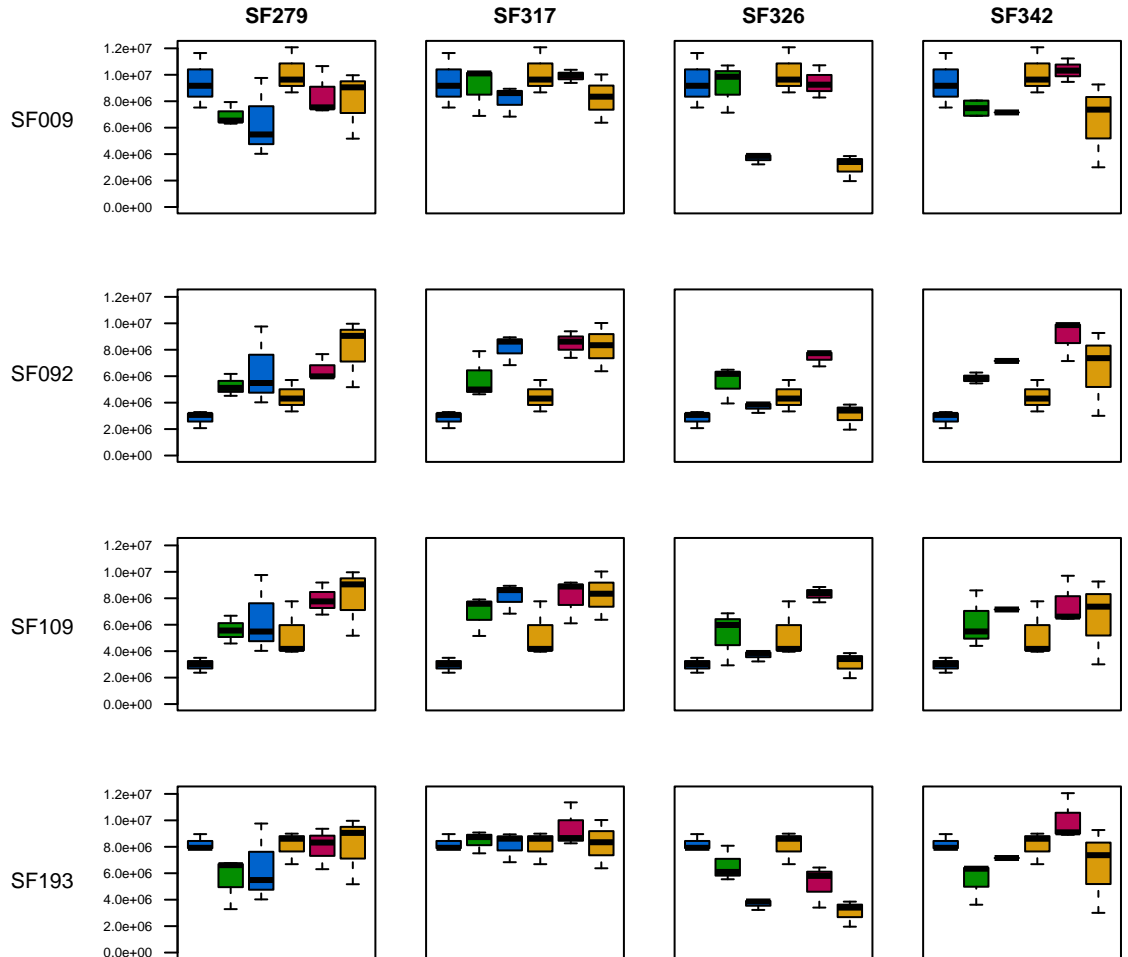

HanXRQChr05g0147371  
Probable annexin 2

Parents WW  
Parents WD  
Hybrids WW  
Hybrids WD

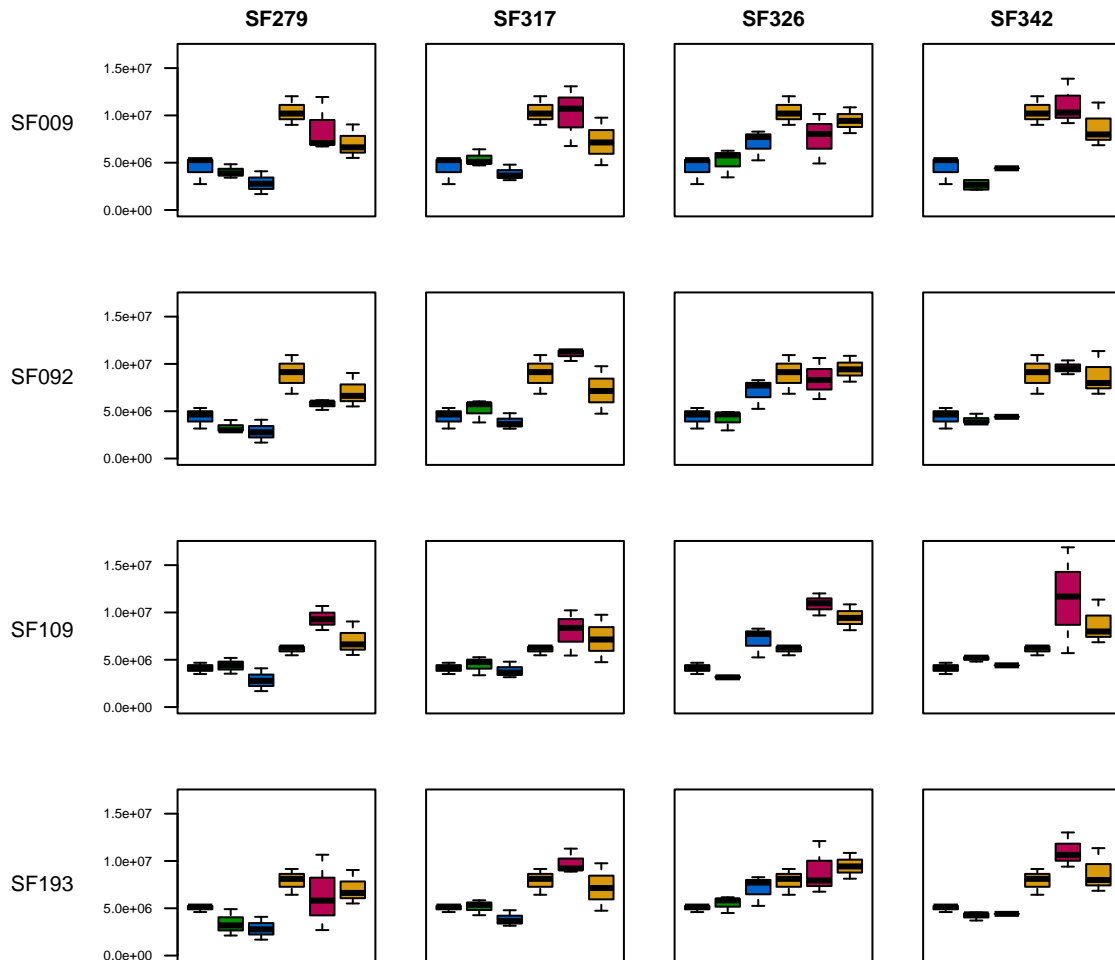

HanXRQChr12g0383151  
Putative peptidase M24, methionine  
aminopeptidase; PA2G4 family; Winged hel

Parents WW  
Parents WD  
Hybrids WW  
Hybrids WD

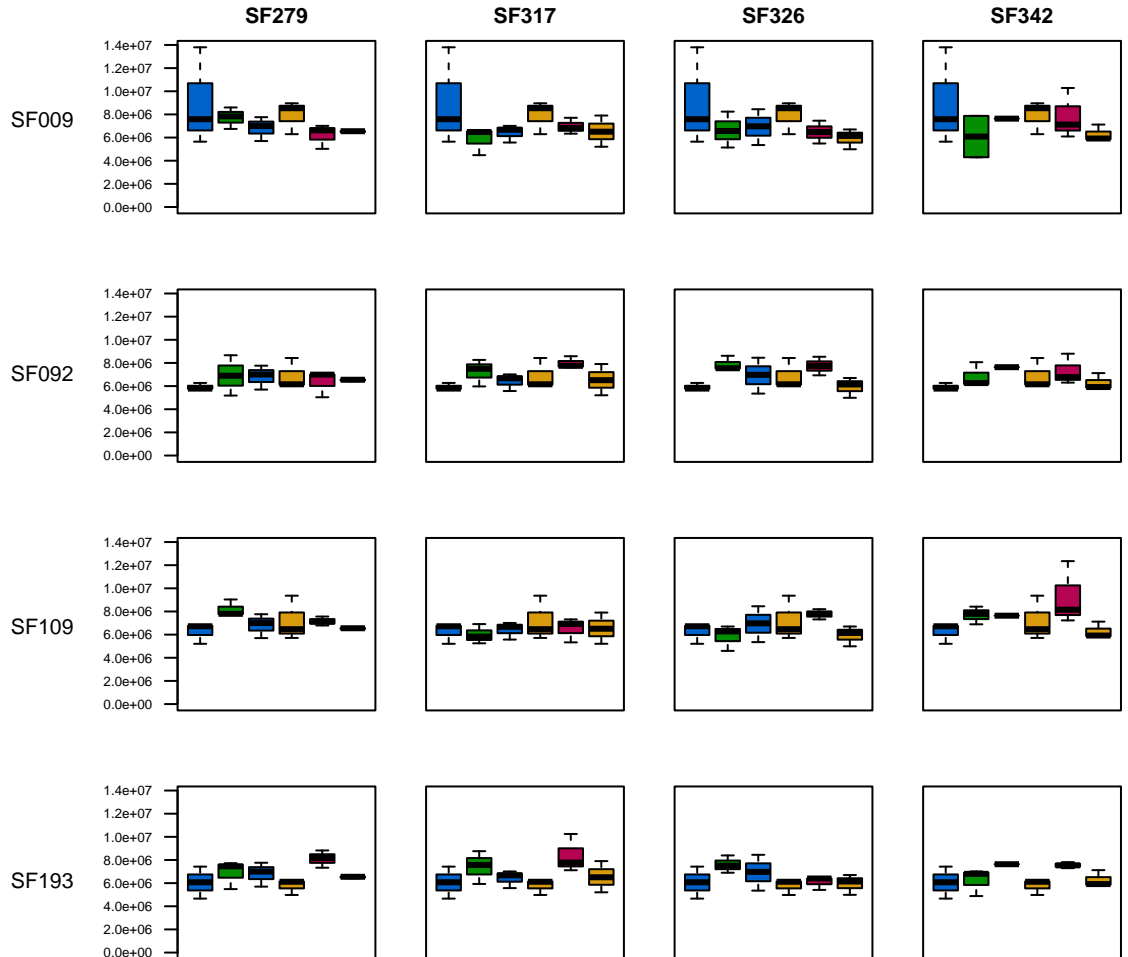

HanXRQChr16g0497591  
Probable peptide methionine sulfoxide  
reductase

Parents WW  
Parents WD  
Hybrids WW  
Hybrids WD

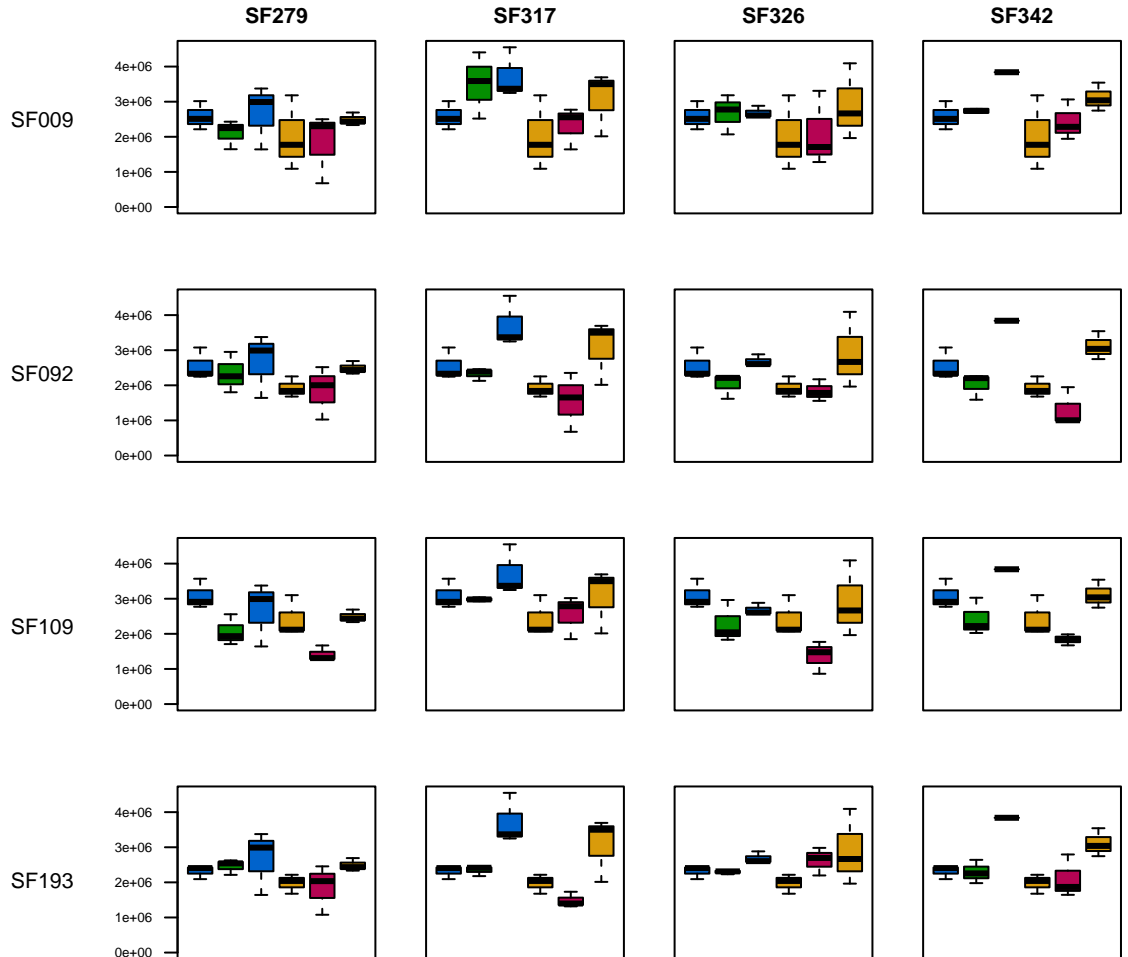

HanXRQChr05g0136941  
Putative ATPase, AAA-type, core; P-loop  
containing nucleoside triphosphate hydrolase

Parents WW  
Parents WD  
Hybrids WW  
Hybrids WD

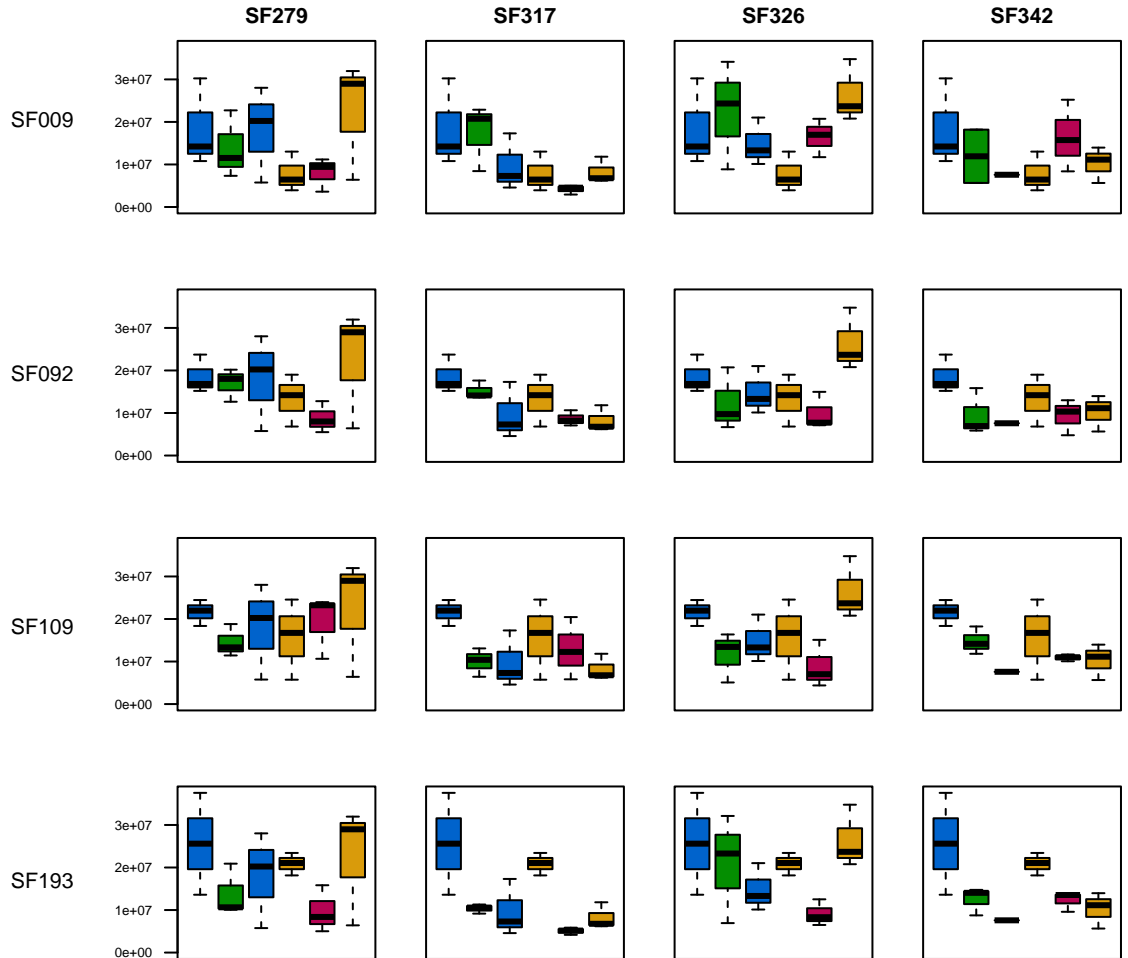

HanXRQChr02g0033441  
Probable alpha/beta-Hydrolases  
superfamily protein

Parents WW  
Parents WD  
Hybrids WW  
Hybrids WD

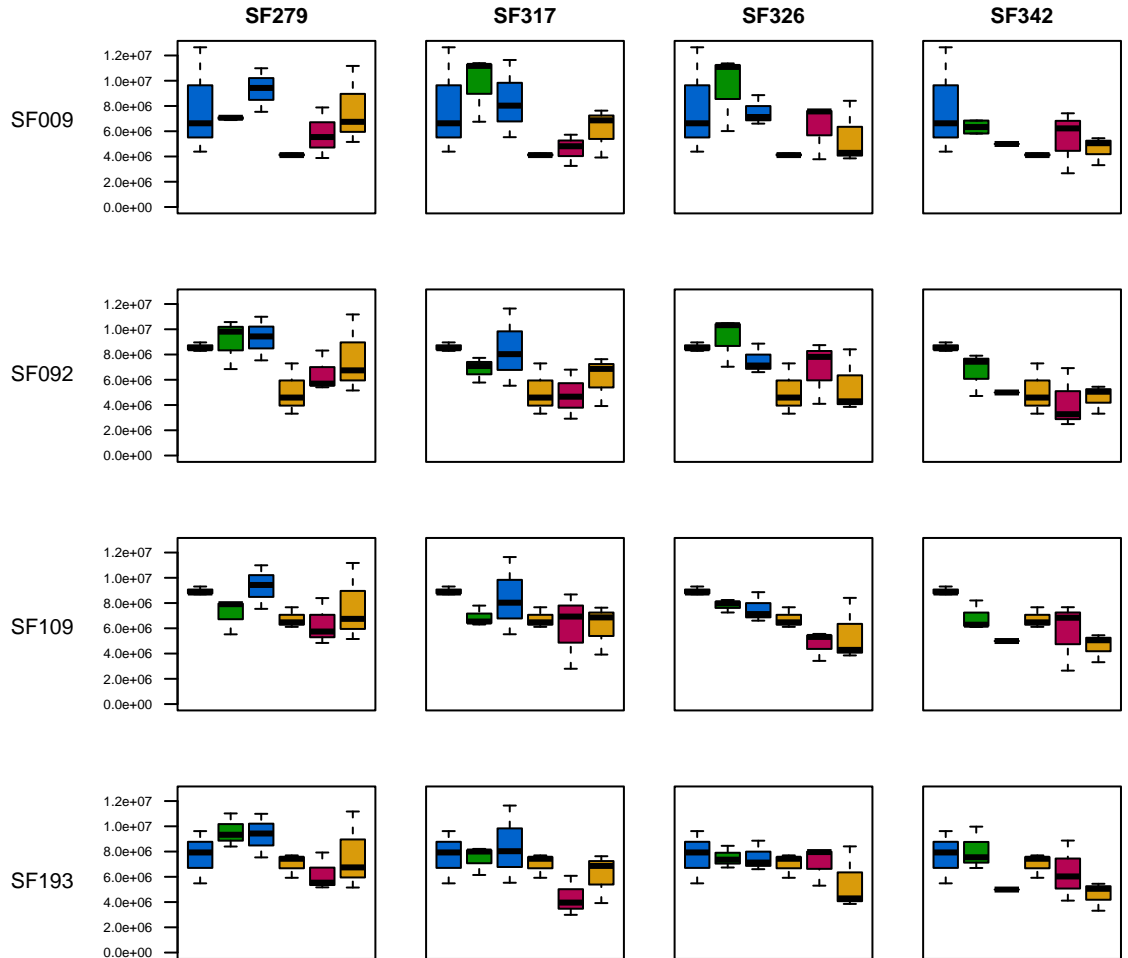

HanXRQChr03g0075191  
Probable HEAT SHOCK PROTEIN 89.1

- Parents WW
- Parents WD
- Hybrids WW
- Hybrids WD

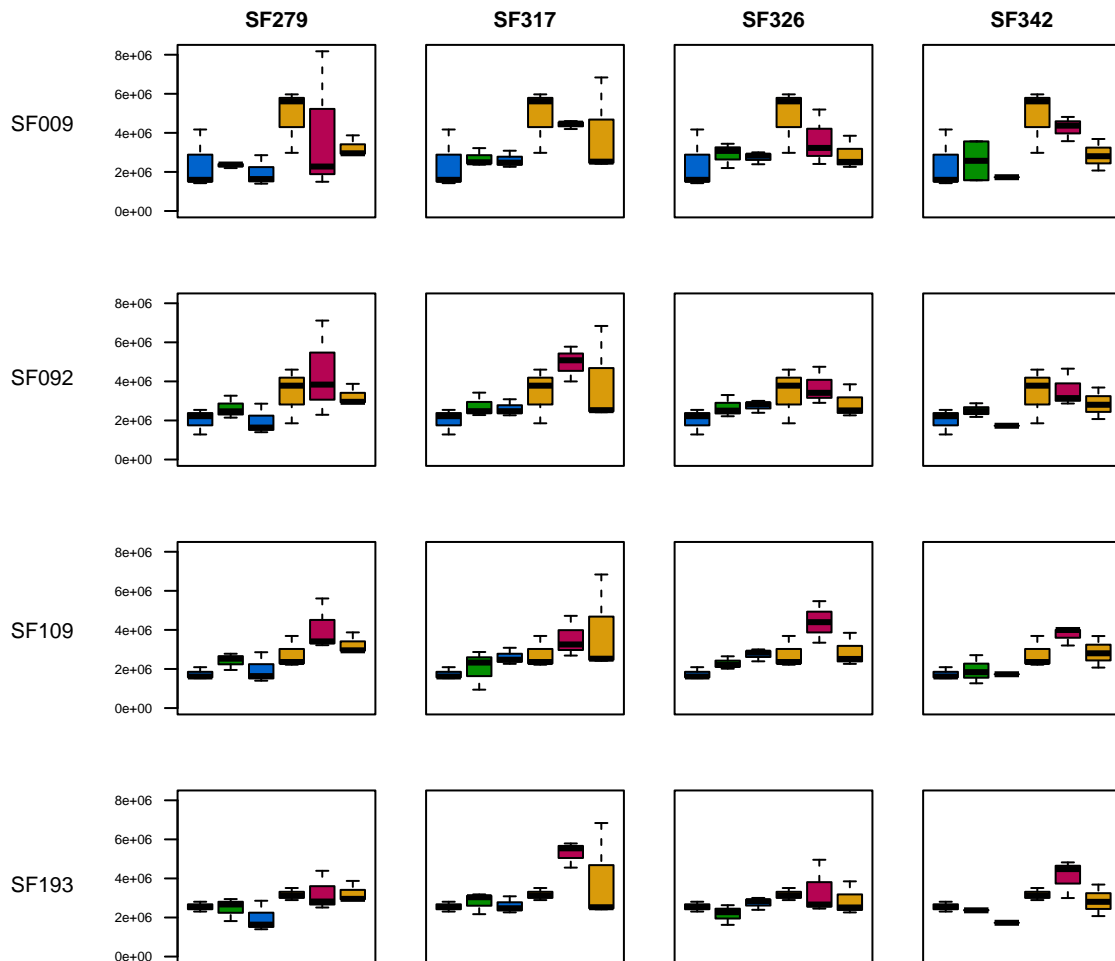

HanXRQChr14g0454971  
Probable beta-hexosaminidase 3

Parents WW  
Parents WD  
Hybrids WW  
Hybrids WD

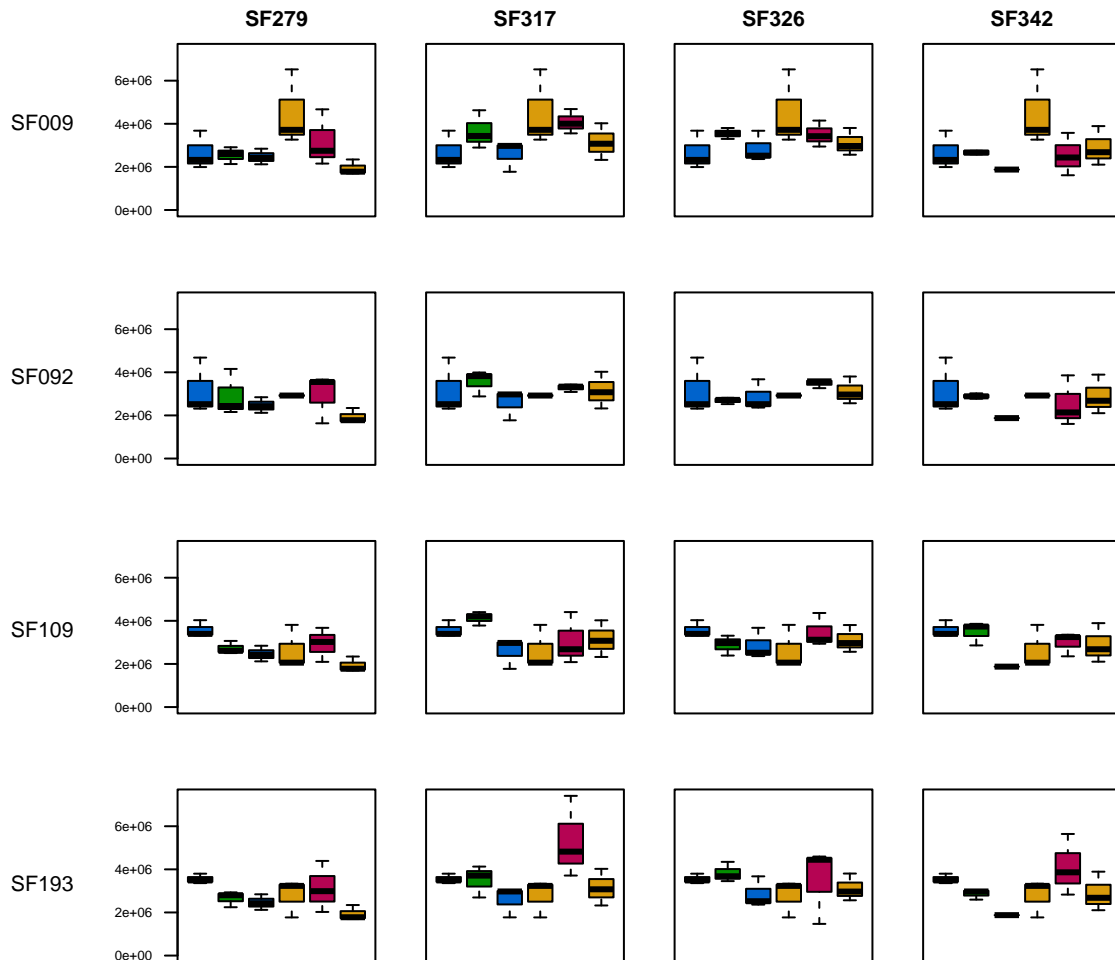



HanXRQChr05g0155461  
Probable betaine aldehyde  
dehydrogenase, chloroplastic

Parents WW  
Parents WD  
Hybrids WW  
Hybrids WD

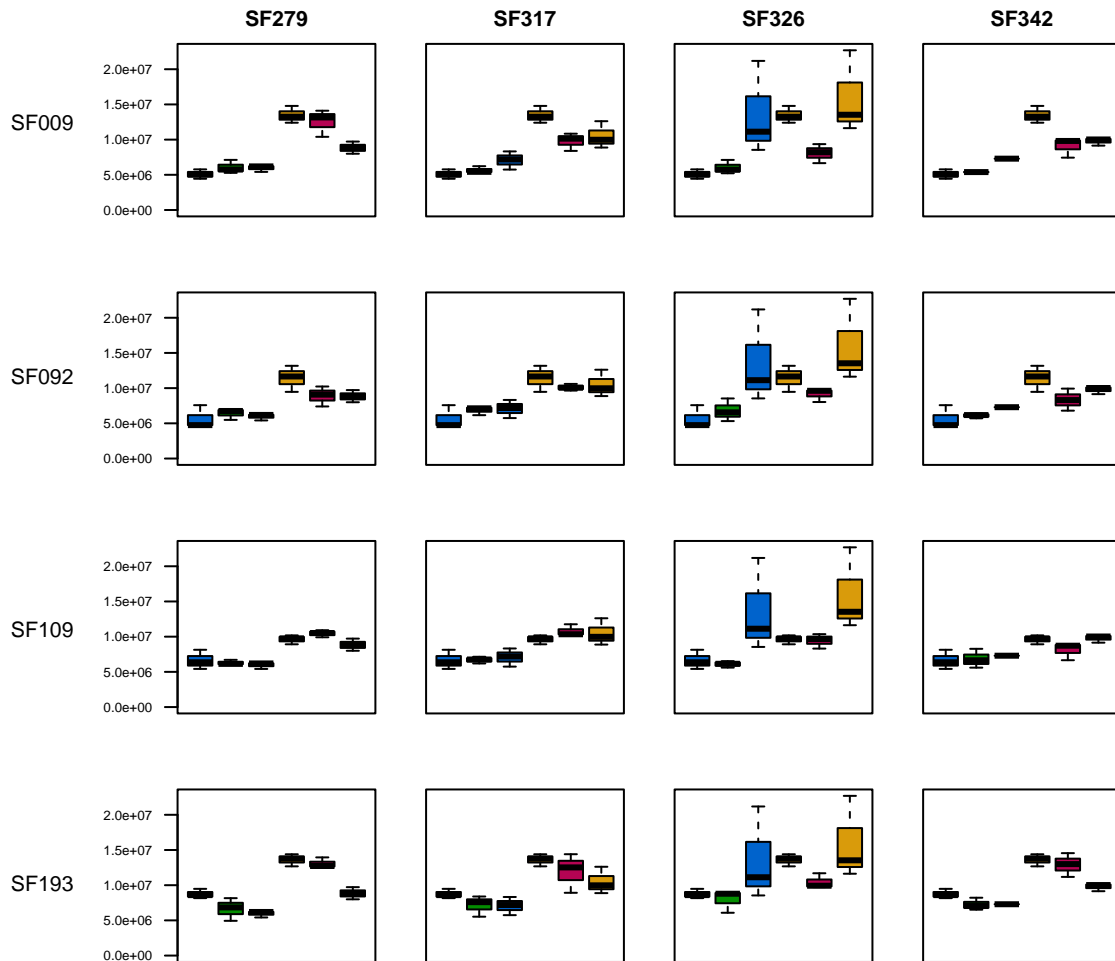

HanXRQChr11g0353631  
 Probable DEAD-box ATP-dependent RNA  
 helicase 15

Parents WW  
 Parents WD  
 Hybrids WW  
 Hybrids WD

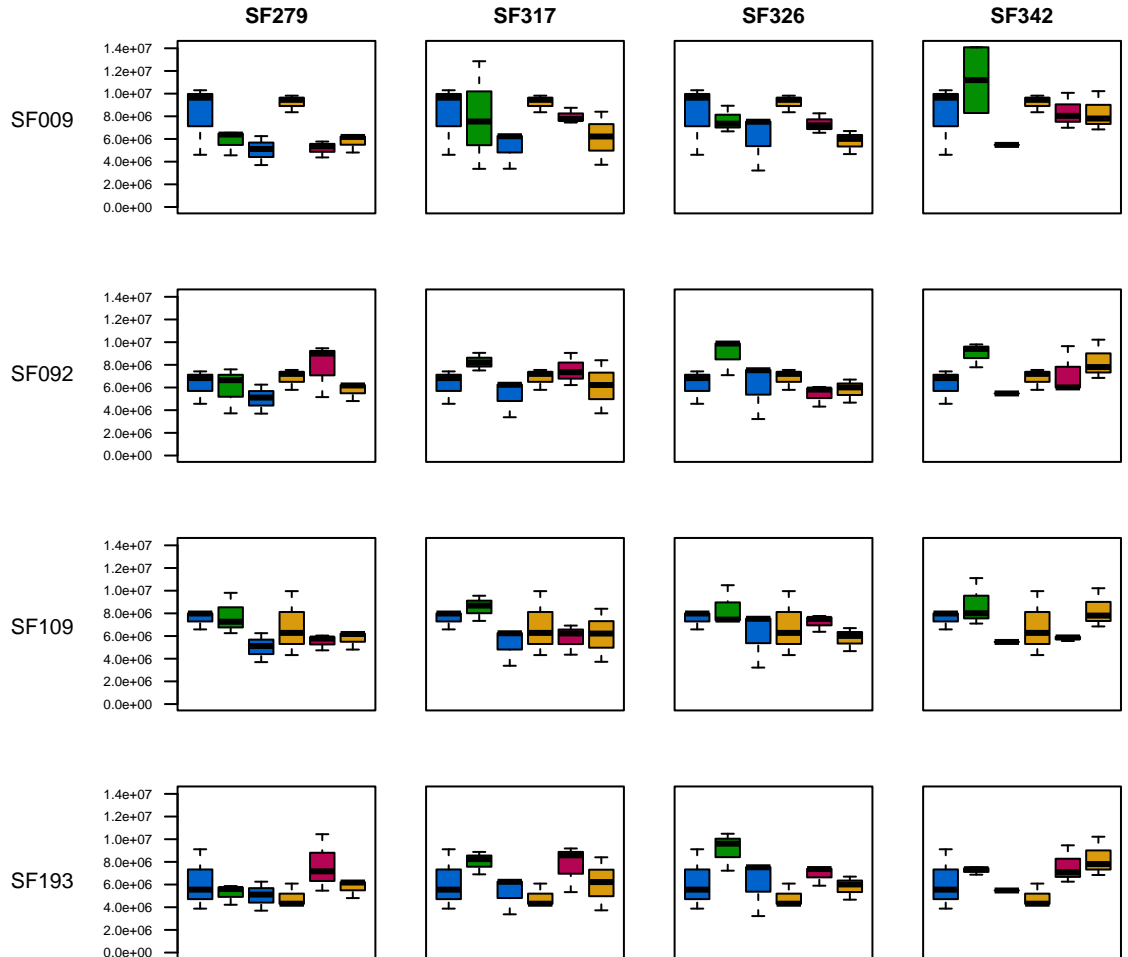

HanXRQChr04g0107421  
 Probable 2-oxoacid dehydrogenases  
 acyltransferase family protein

Parents WW  
 Parents WD  
 Hybrids WW  
 Hybrids WD

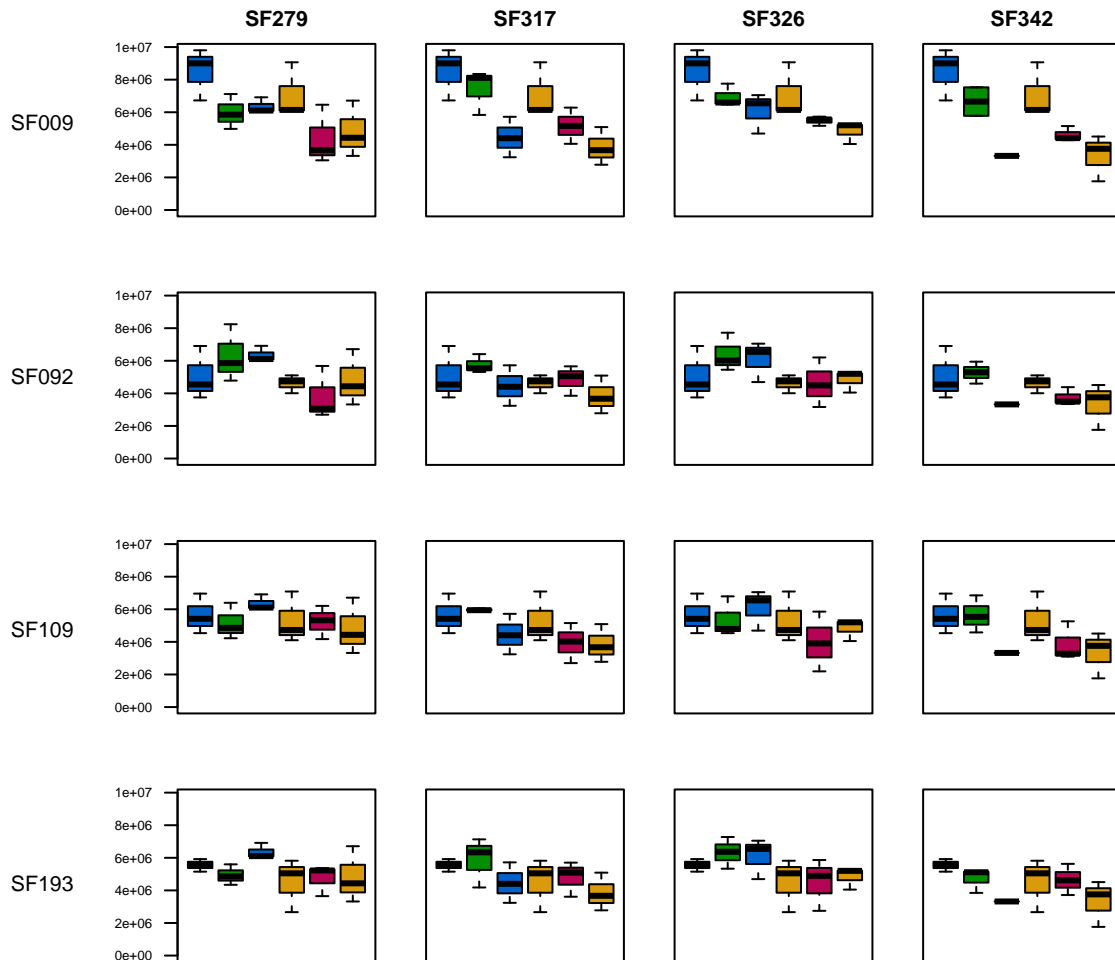

HanXRQChr10g0303361  
Probable ADP,ATP carrier protein,  
mitochondrial

Parents WW  
Parents WD  
Hybrids WW  
Hybrids WD

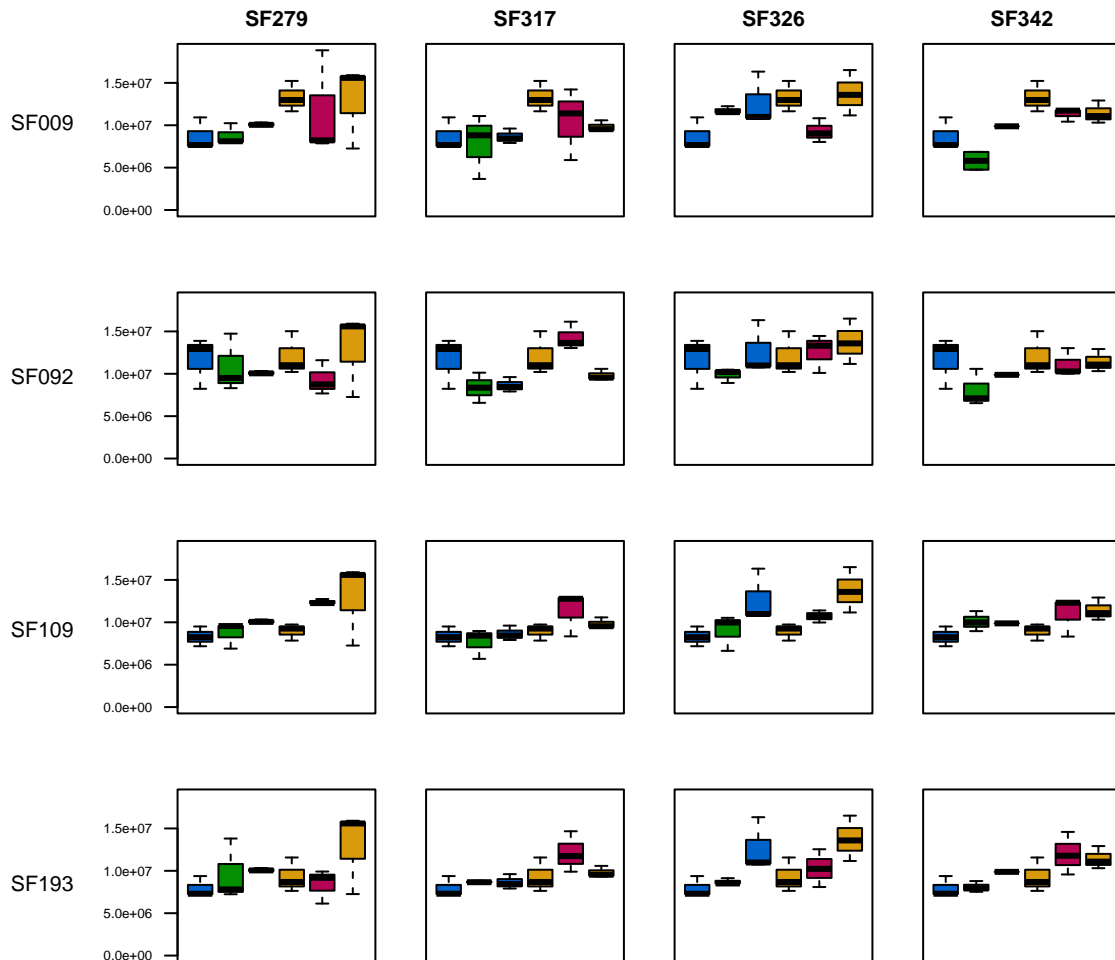

HanXRQChr07g0185721  
Probable 26S proteasome regulatory  
complex, non-ATPase subcomplex, Rpn2/F

Parents WW  
Parents WD  
Hybrids WW  
Hybrids WD

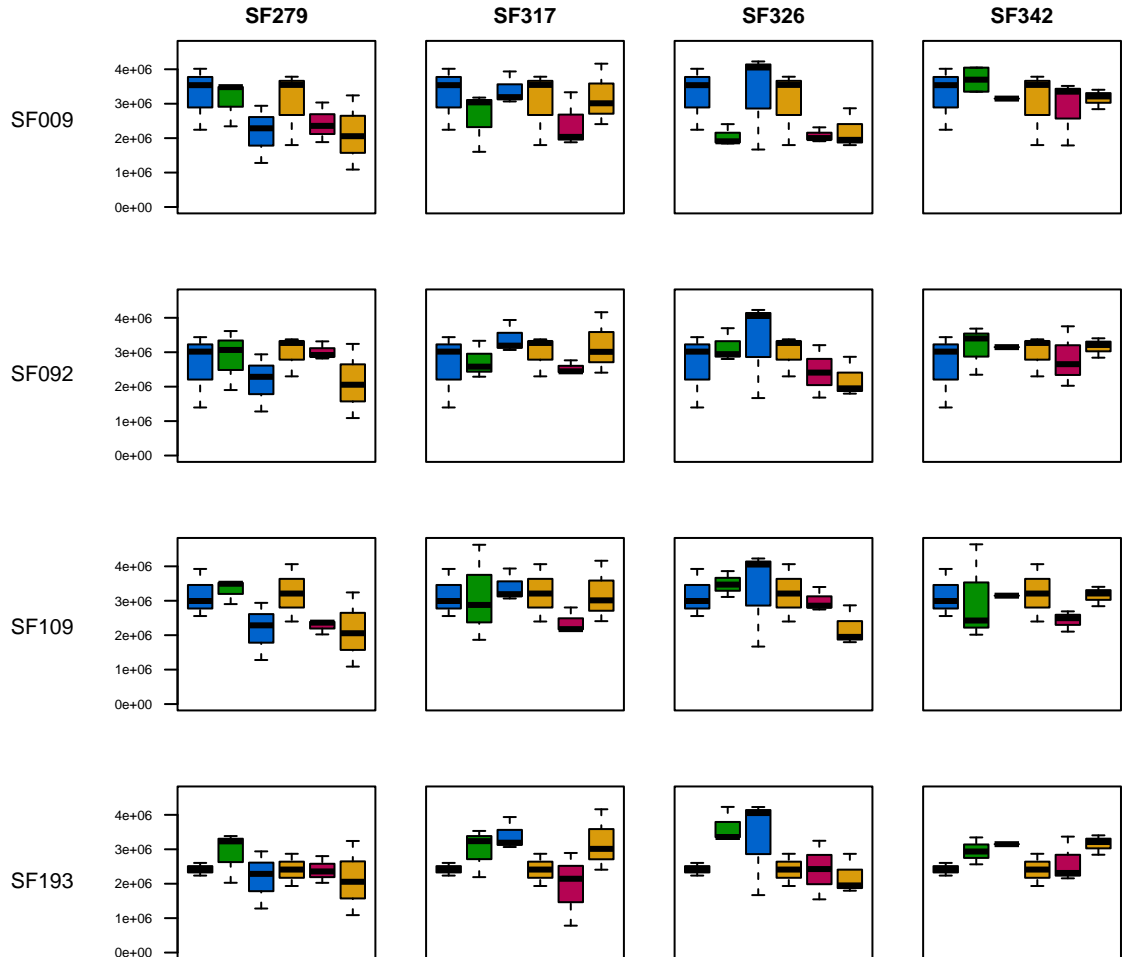

HanXRQChr14g0438681  
 Probable acclimation of photosynthesis  
 to environment

Parents WW  
 Parents WD  
 Hybrids WW  
 Hybrids WD

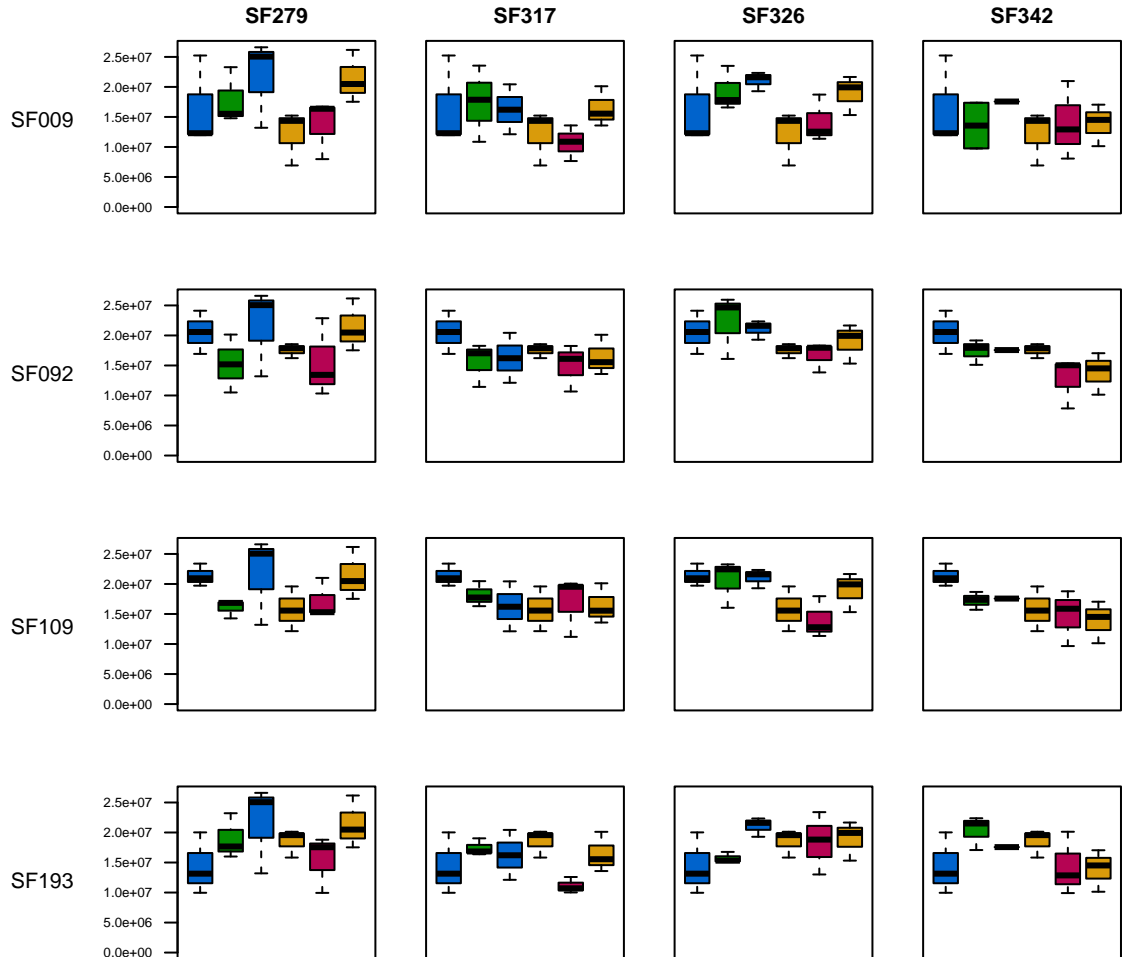

HanXRQChr06g0180421  
Putative DNA-binding domain

Parents WW  
Parents WD  
Hybrids WW  
Hybrids WD

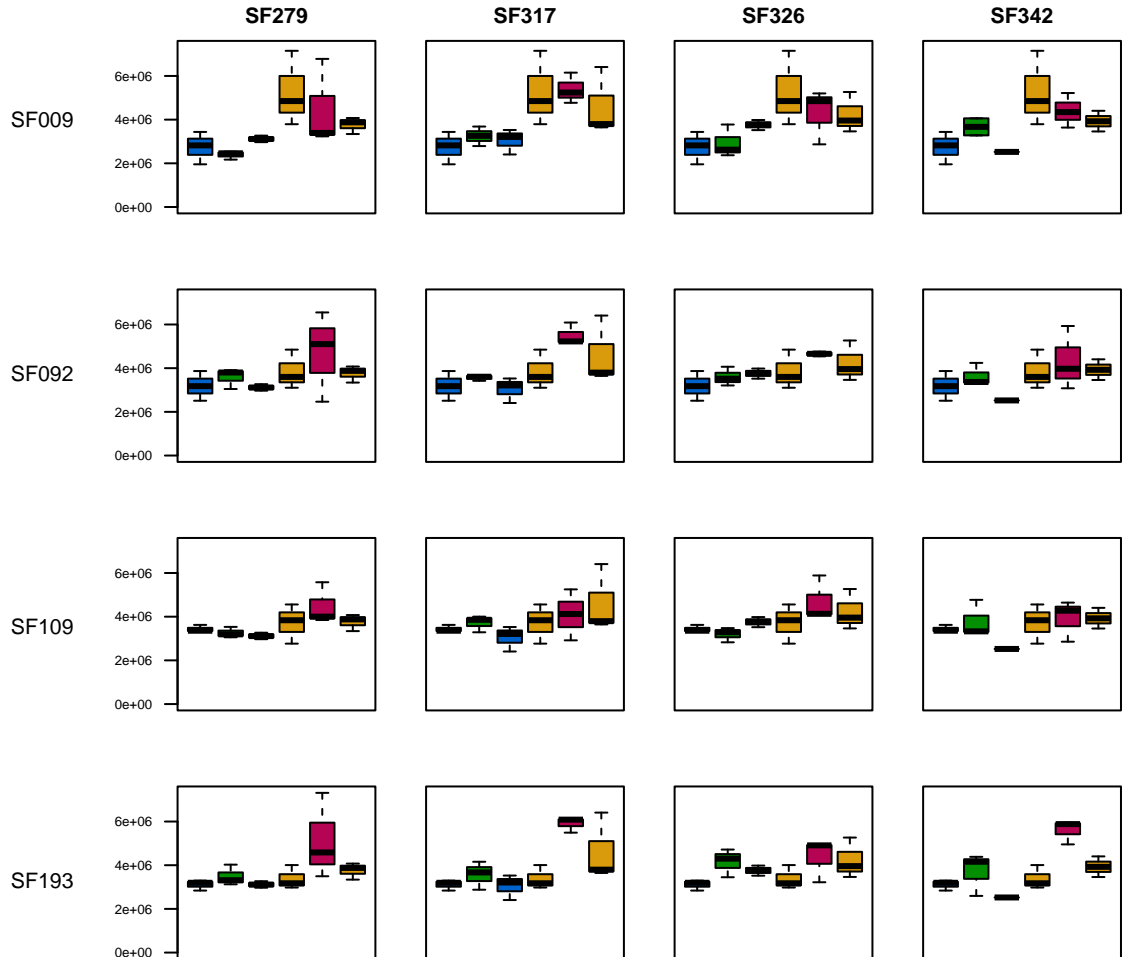

HanXRQChr01g0007841  
Probable serine carboxypeptidase II-3

Parents WW  
Parents WD  
Hybrids WW  
Hybrids WD

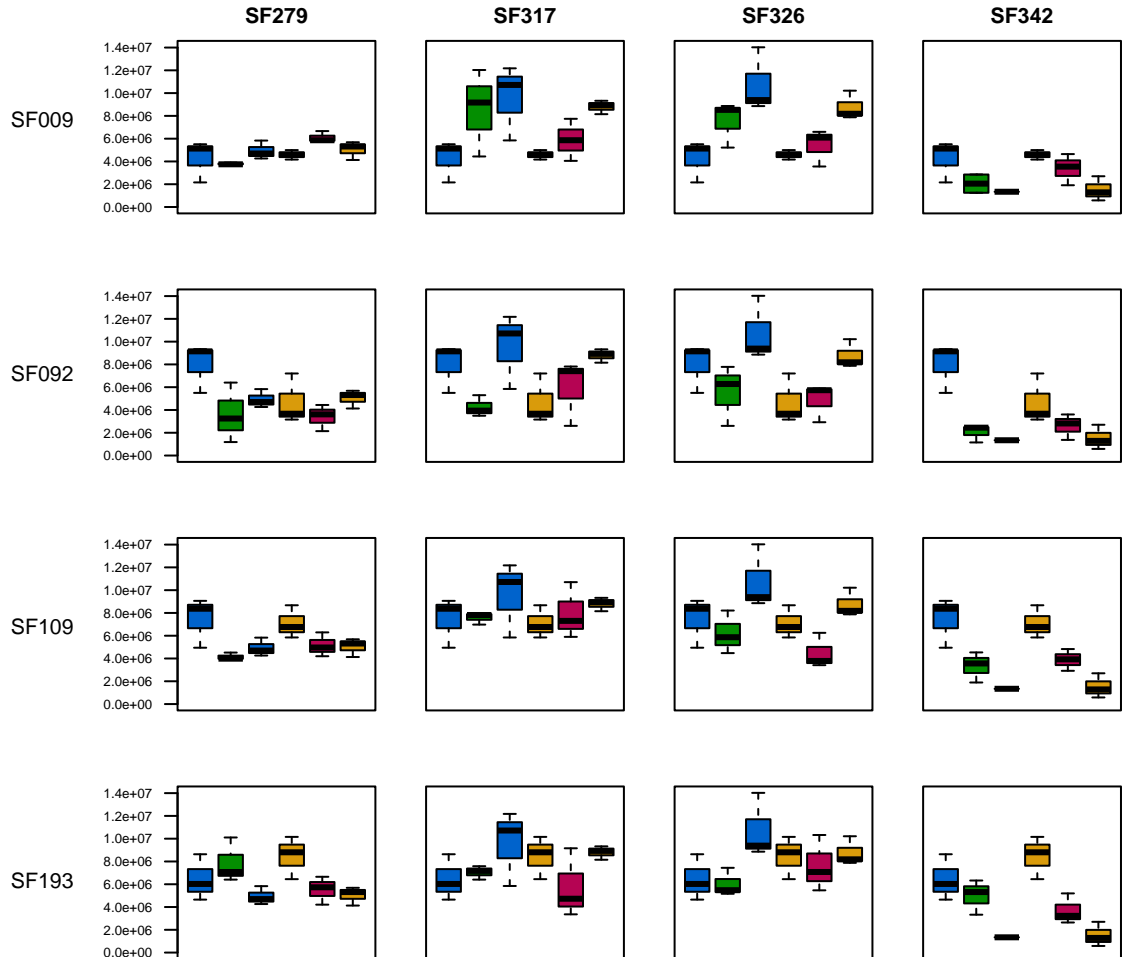



HanXRQChr02g0055581  
Probable superoxide dismutase [Cu-Zn],  
chloroplastic

Parents WW  
Parents WD  
Hybrids WW  
Hybrids WD

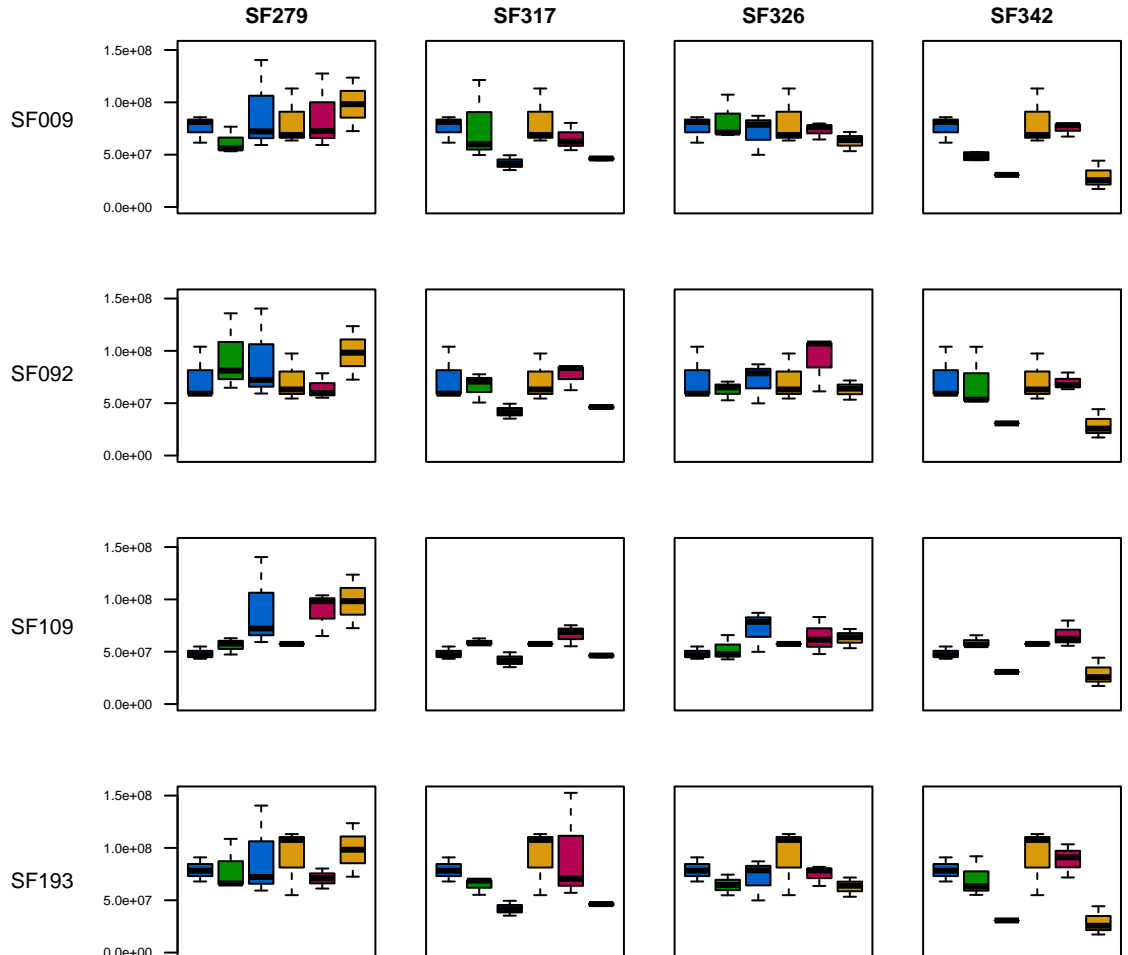

HanXRQChr13g0413421  
Probable major allergen Pyr c 1

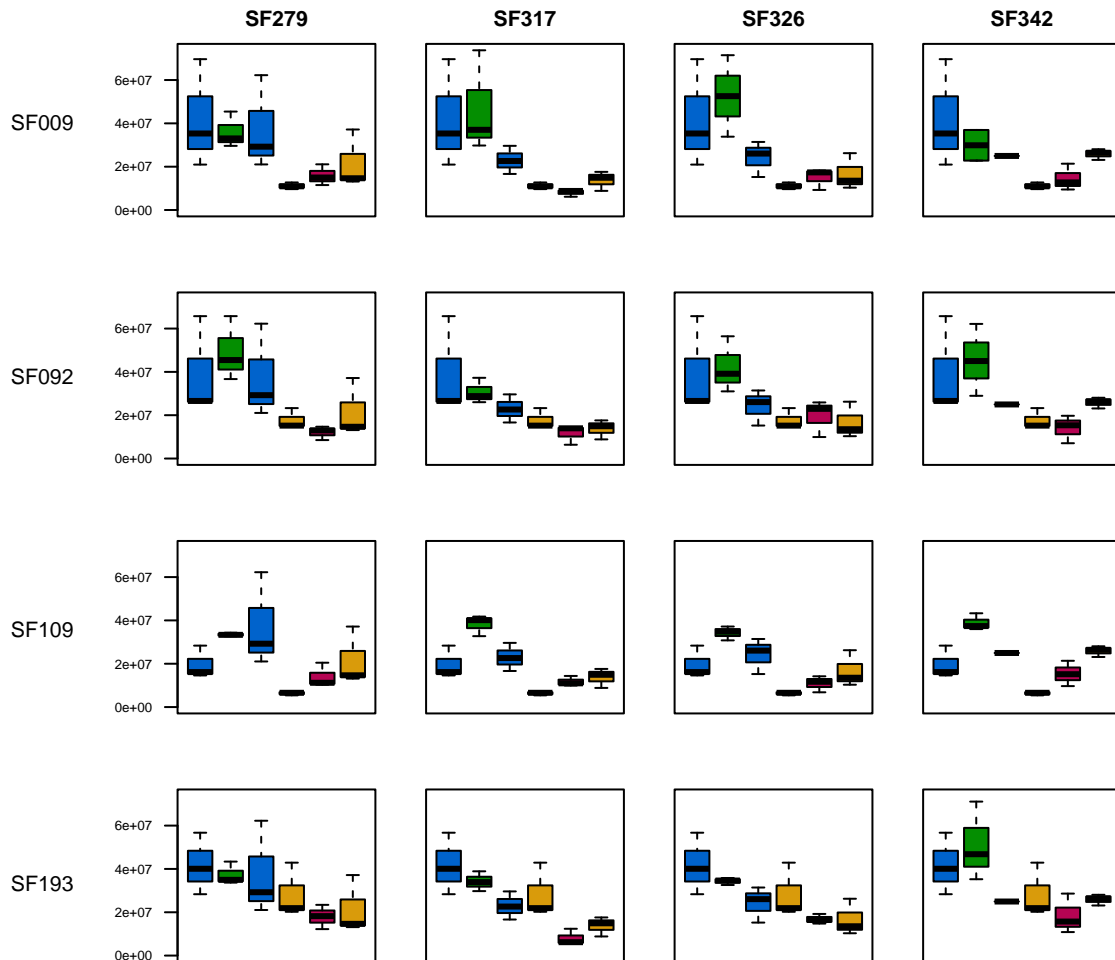

HanXRQChr17g0538361  
Probable SWAP  
(Suppressor-of-White-APricot)/surp doma

Parents WW  
Parents WD  
Hybrids WW  
Hybrids WD

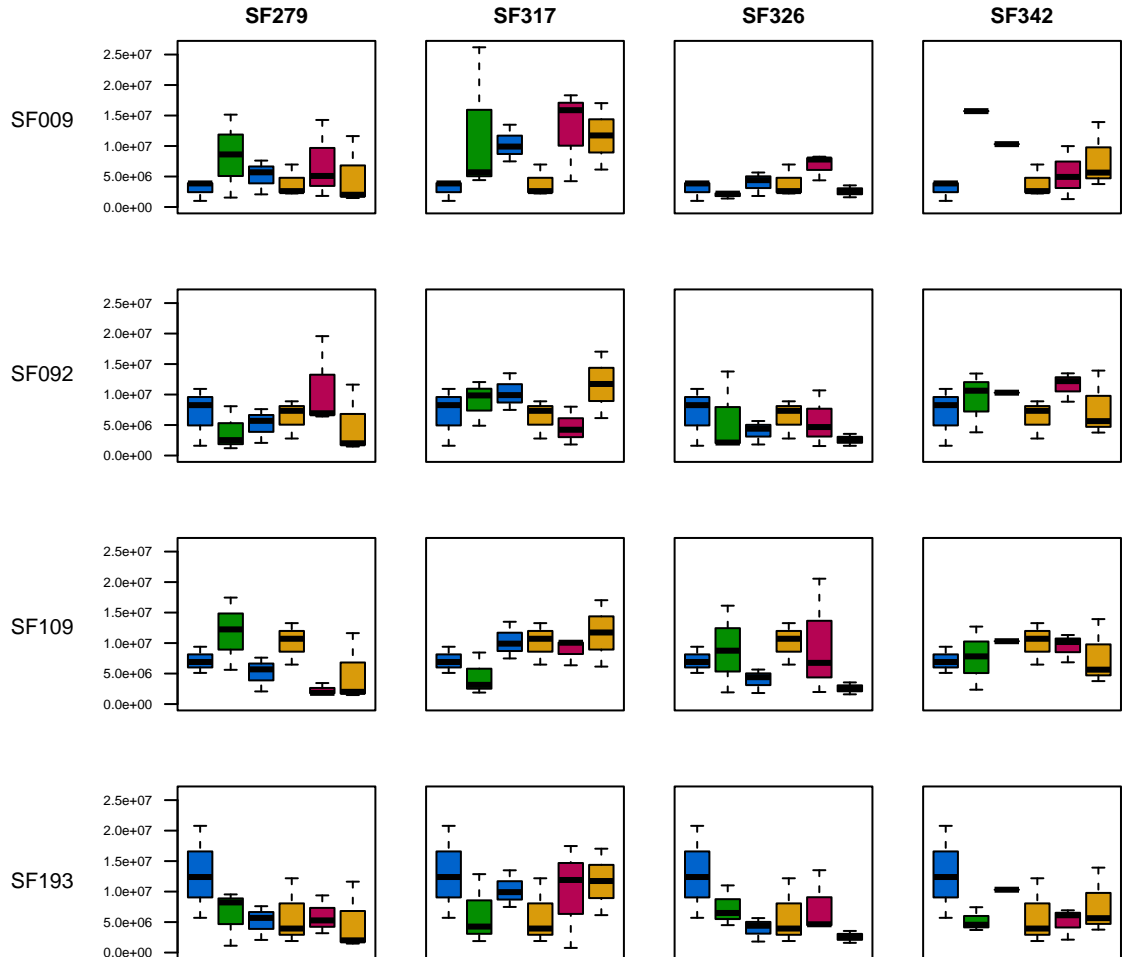

HanXRQChr05g0159221  
 Uncharacterized protein, conserved in  
 plant genome(s), supported by expression c

Parents WW  
 Parents WD  
 Hybrids WW  
 Hybrids WD

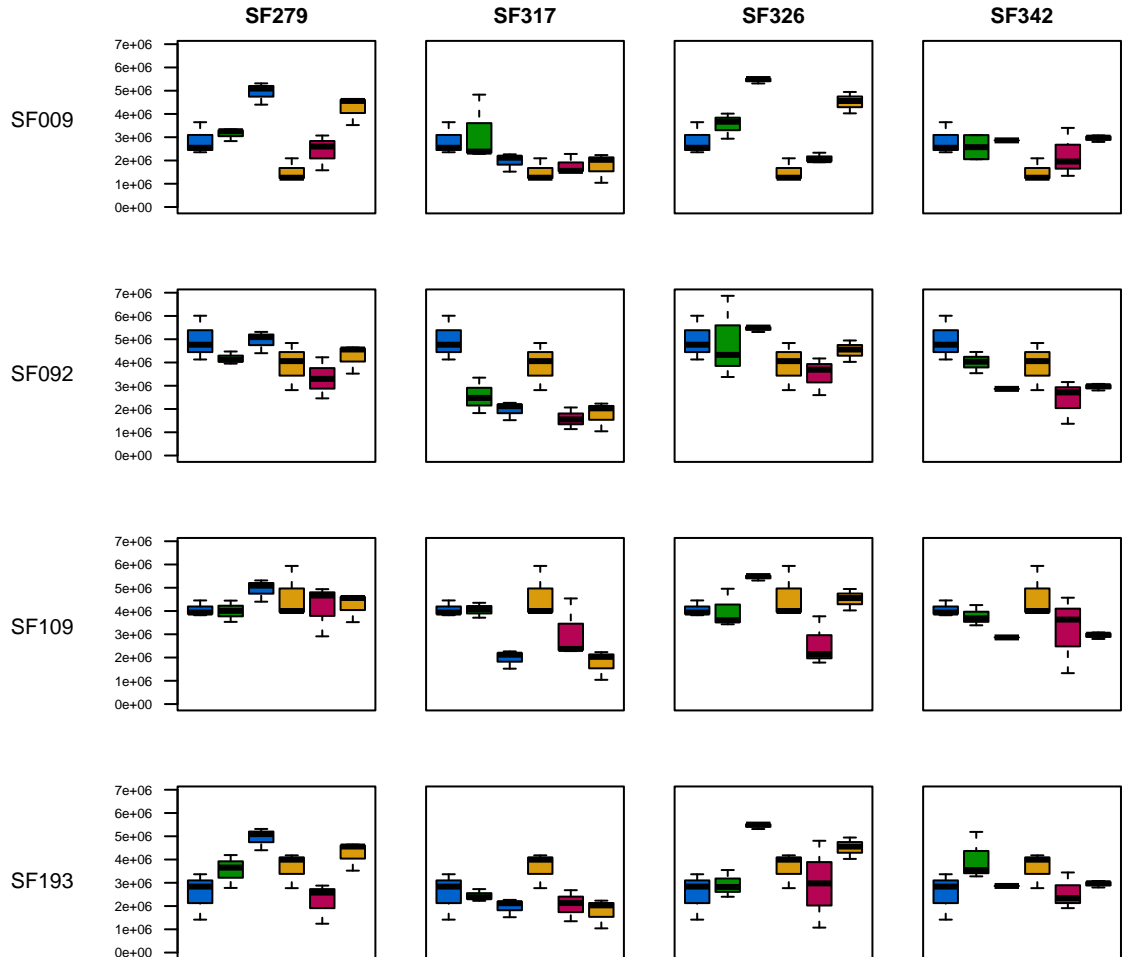

HanXRQChr02g0059571  
Probable dihydroxy-acid dehydratase

Parents WW  
Parents WD  
Hybrids WW  
Hybrids WD

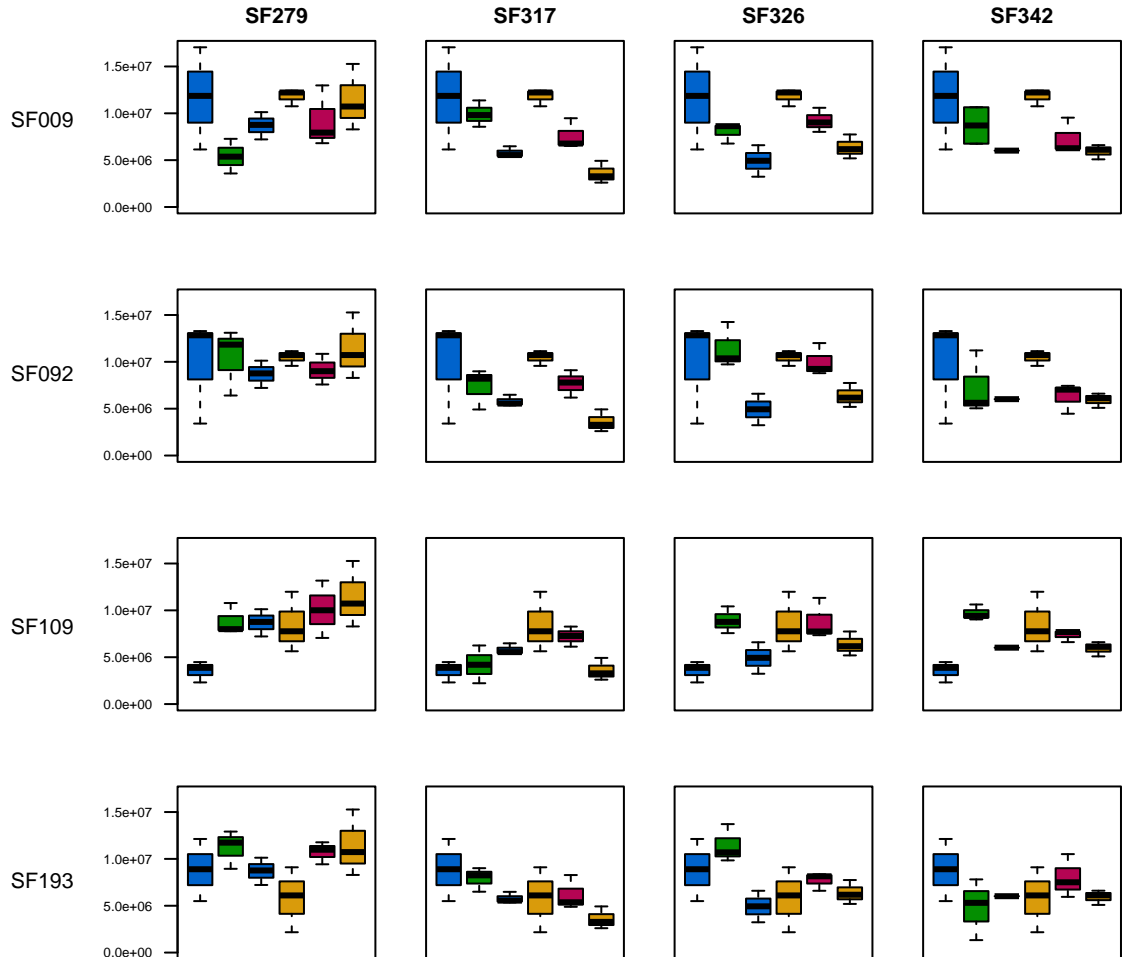

HanXRQChr11g0320301  
Putative thioredoxin; Thioredoxin-like  
fold

Parents WW  
Parents WD  
Hybrids WW  
Hybrids WD

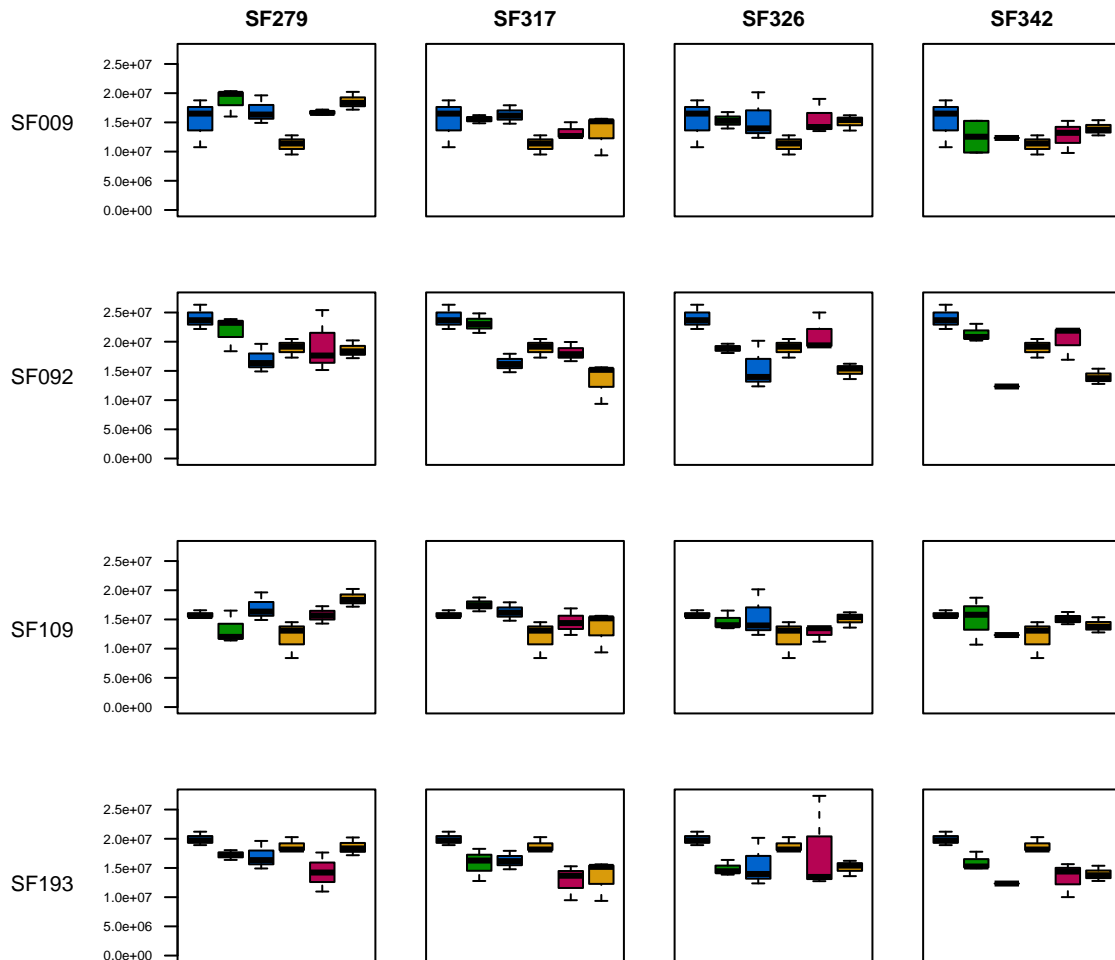

HanXRQChr13g0417111  
 Probable stress-inducible protein,  
 putative

Parents WW  
 Parents WD  
 Hybrids WW  
 Hybrids WD

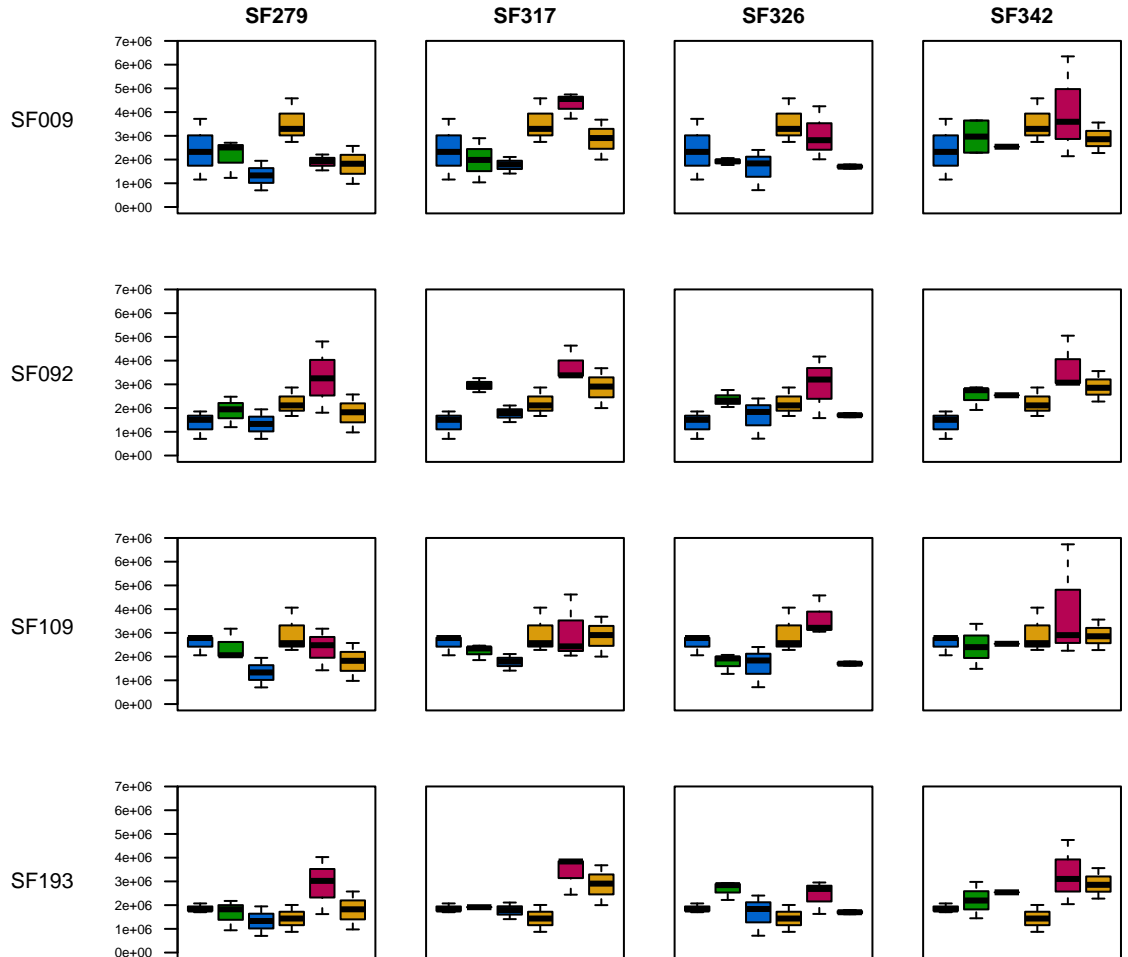

HanXRQChr05g0148731  
Probable V-type proton ATPase subunit B  
2

Parents WW  
Parents WD  
Hybrids WW  
Hybrids WD

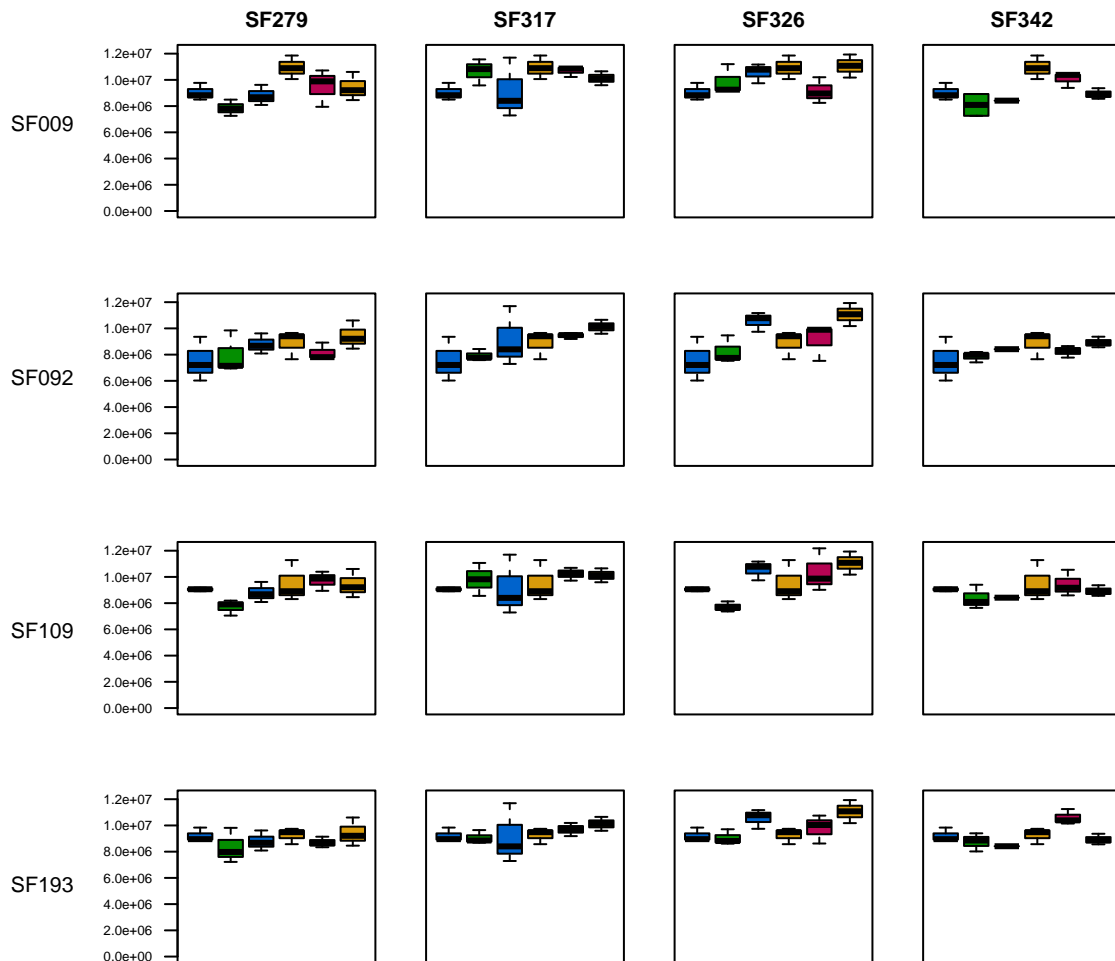



HanXRQChr03g0076471  
Probable aconitate hydratase,  
cytoplasmic

Parents WW  
Parents WD  
Hybrids WW  
Hybrids WD

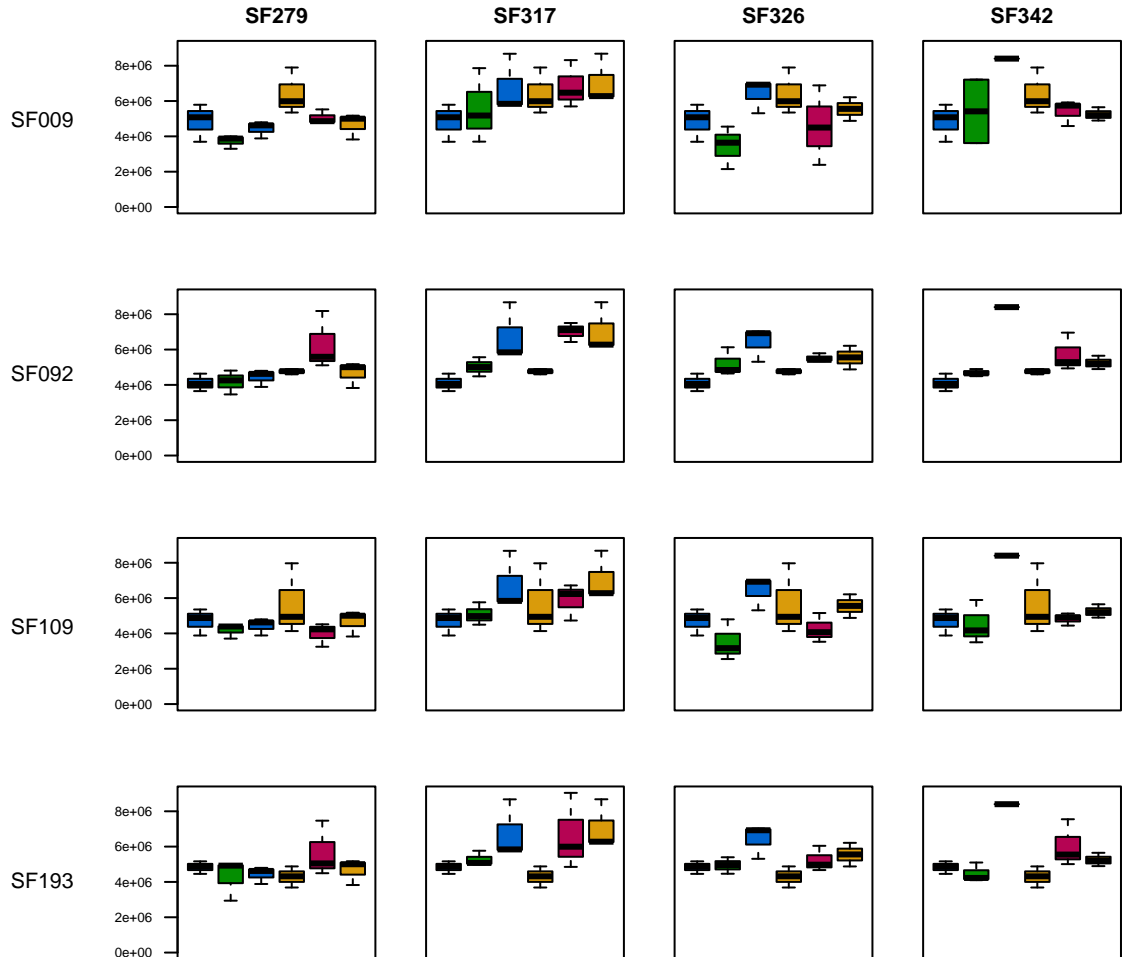

HanXRQChr02g0034141  
 Probable glutamate-1-semialdehyde  
 2,1-aminomutase, chloroplastic

Parents WW  
 Parents WD  
 Hybrids WW  
 Hybrids WD

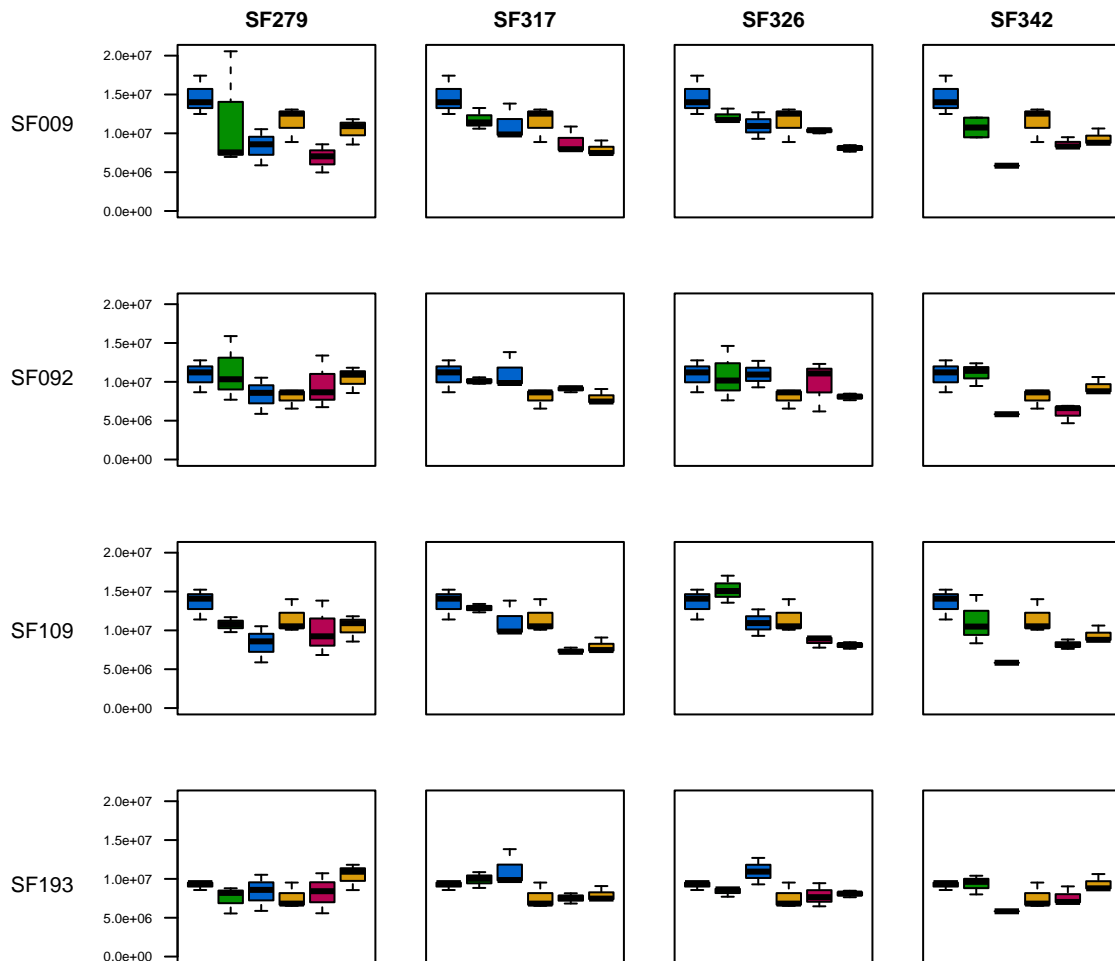

HanXRQChr04g0115661  
Probable nagB/RpiA/CoA transferase-like  
superfamily protein

Parents WW  
Parents WD  
Hybrids WW  
Hybrids WD

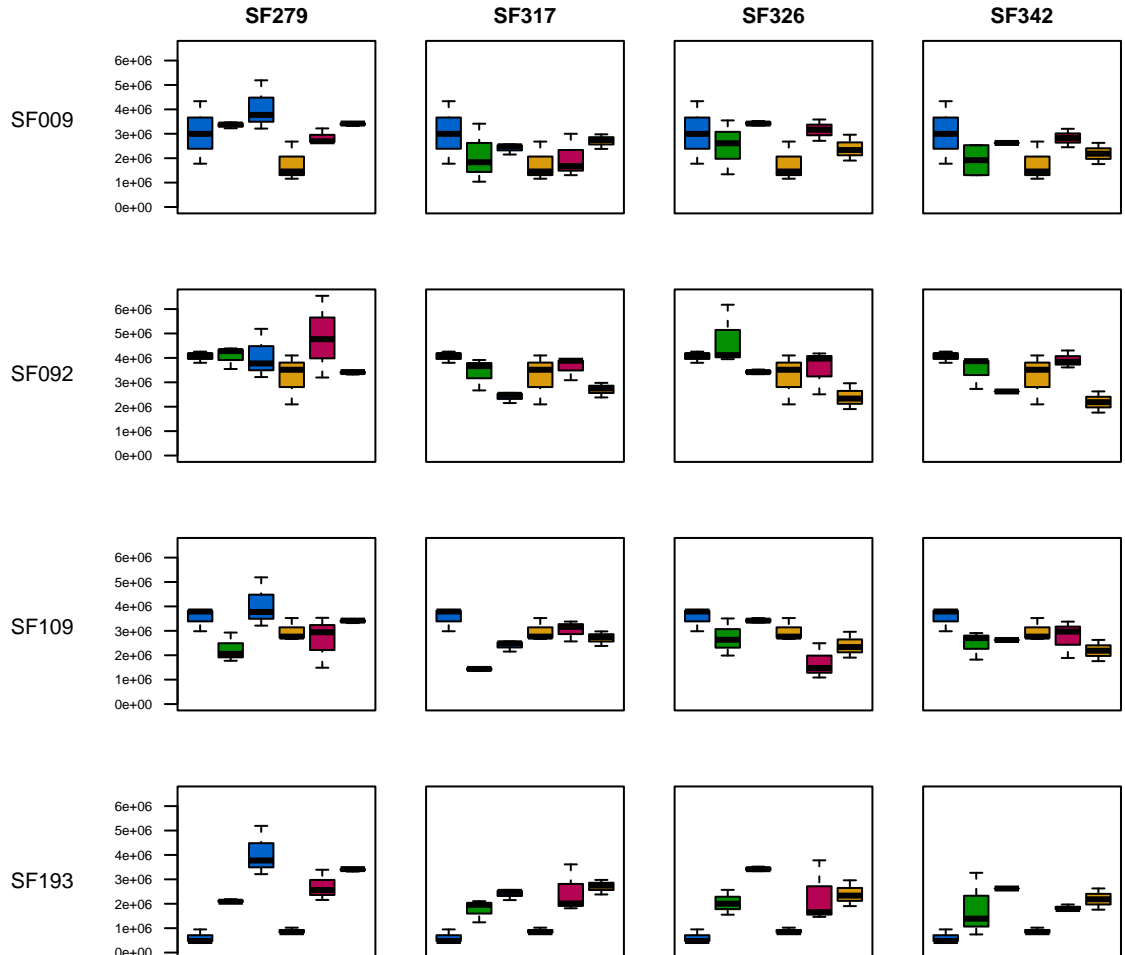

HanXRQChr11g0338131  
Putative heavy metal-associated domain,  
HMA

Parents WW  
Parents WD  
Hybrids WW  
Hybrids WD

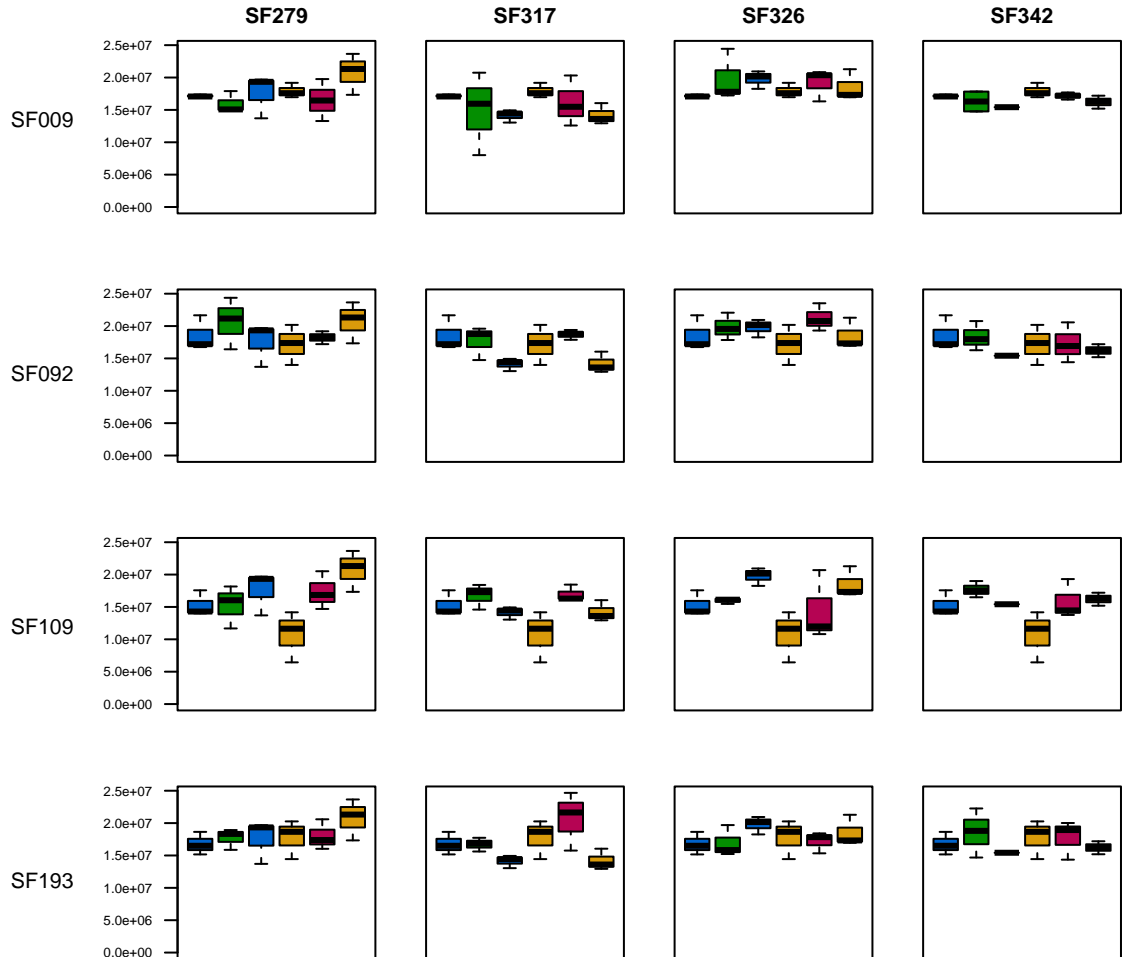

HanXRQChr14g0453341  
Protein of unknown function, DUF538

- Parents WW
- Parents WD
- Hybrids WW
- Hybrids WD

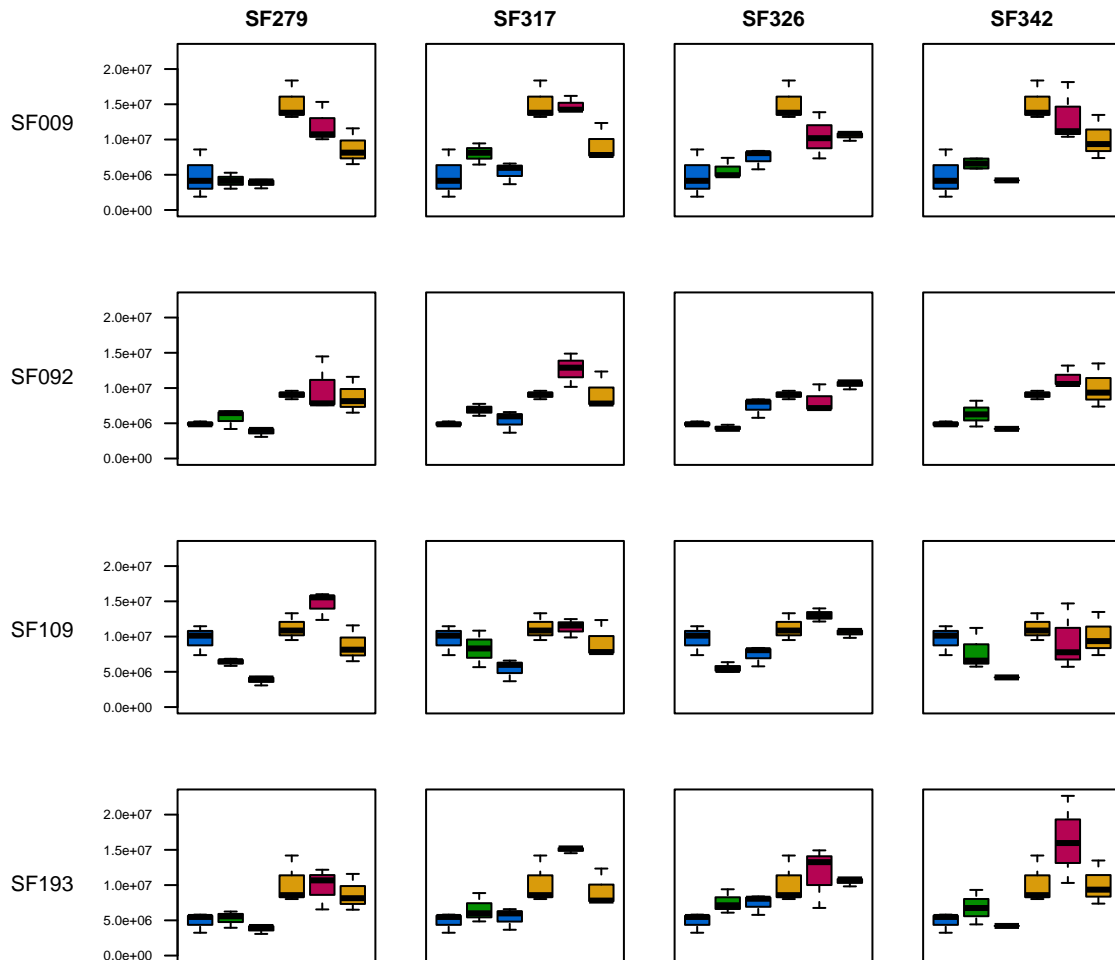

HanXRQChr13g0402501  
Protein of unknown function, DUF642

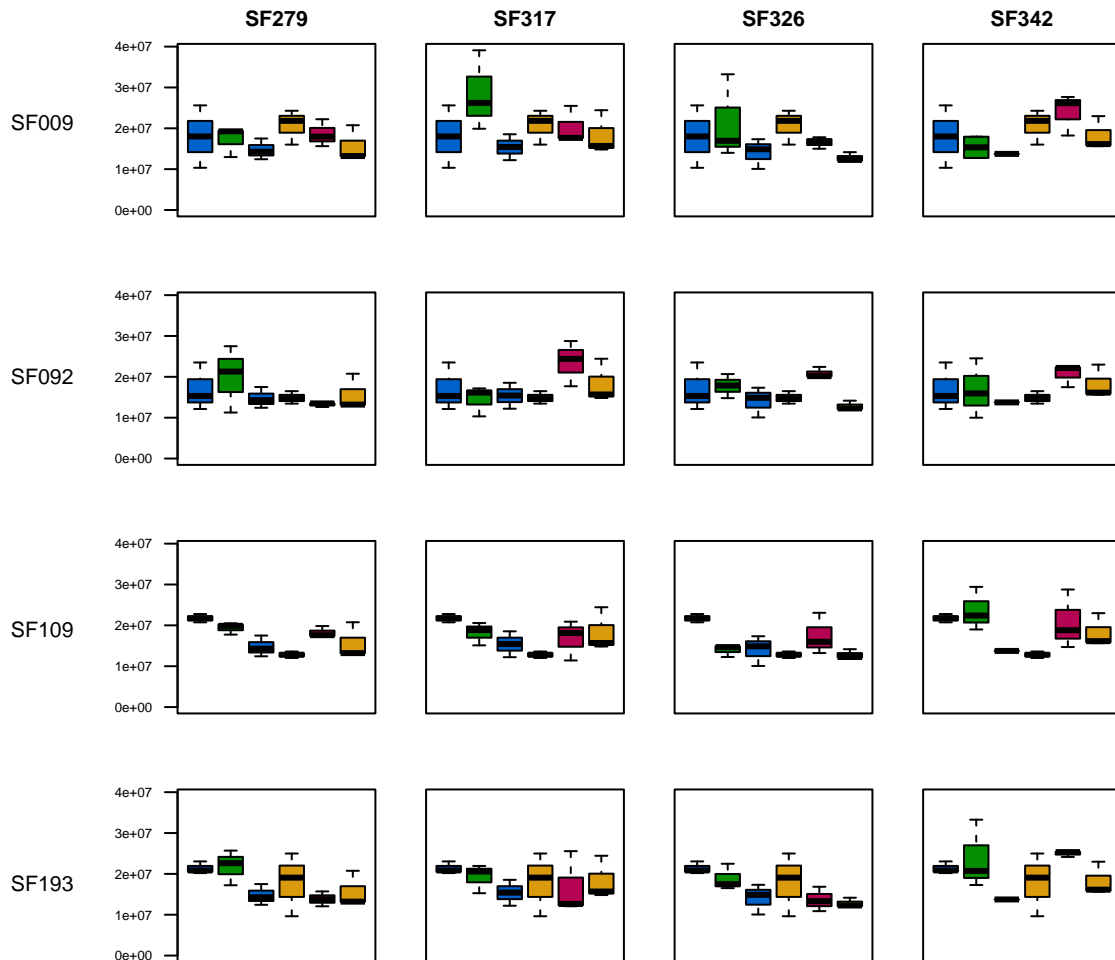

HanXRQChr14g0459041  
Probable isocitrate dehydrogenase 1

Parents WW  
Parents WD  
Hybrids WW  
Hybrids WD

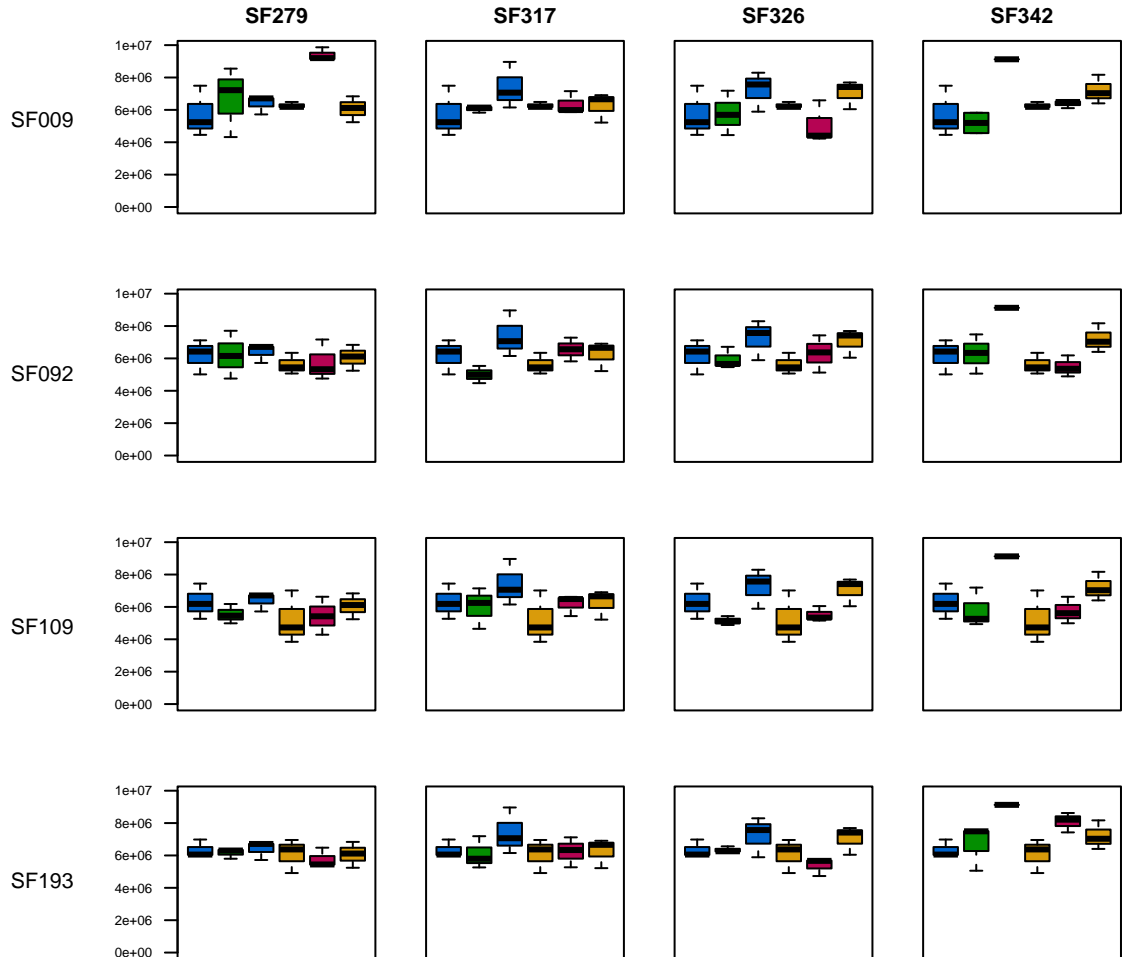

HanXRQChr04g0114781  
Probable sucrose synthase 2

- Parents WW
- Parents WD
- Hybrids WW
- Hybrids WD

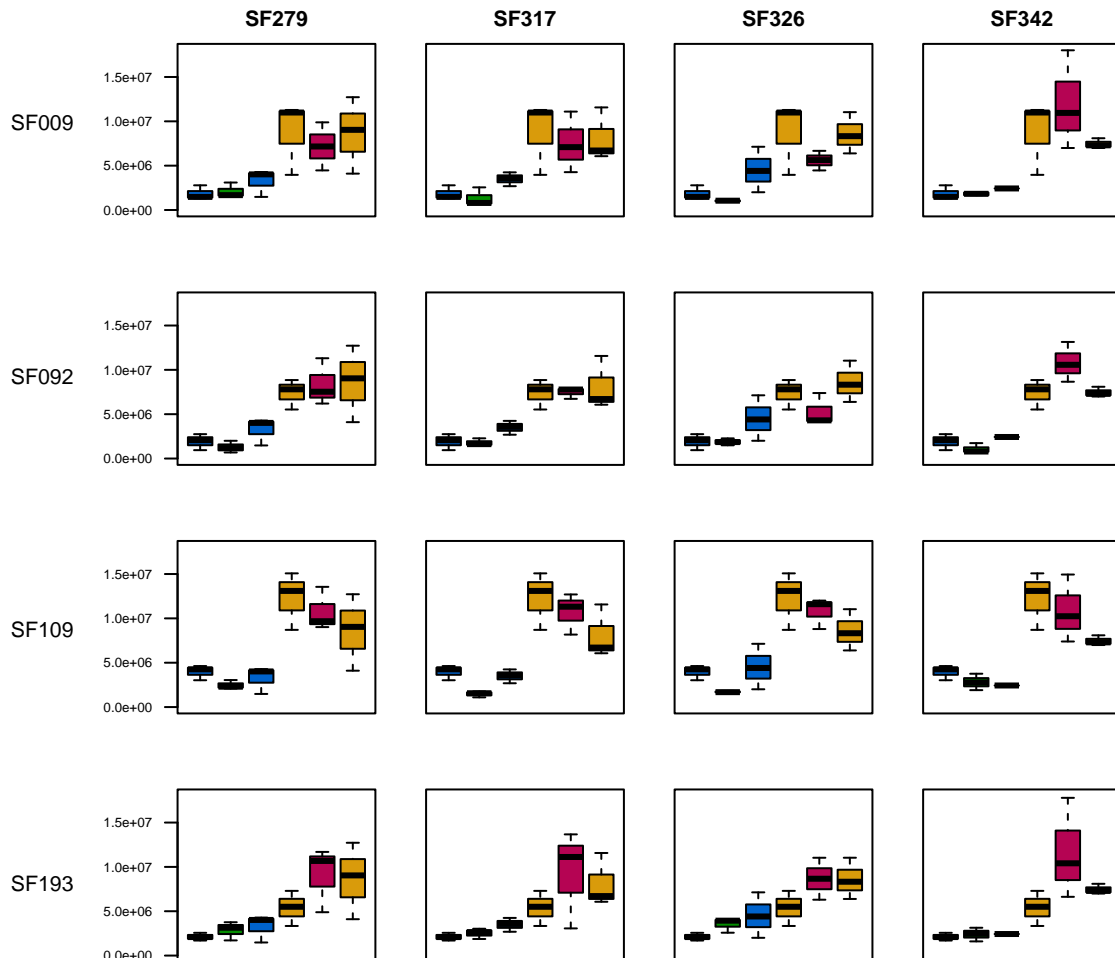



HanXRQChr13g0405961  
Probable putative glycosyl hydrolase of  
unknown function (DUF1680)

Parents WW  
Parents WD  
Hybrids WW  
Hybrids WD

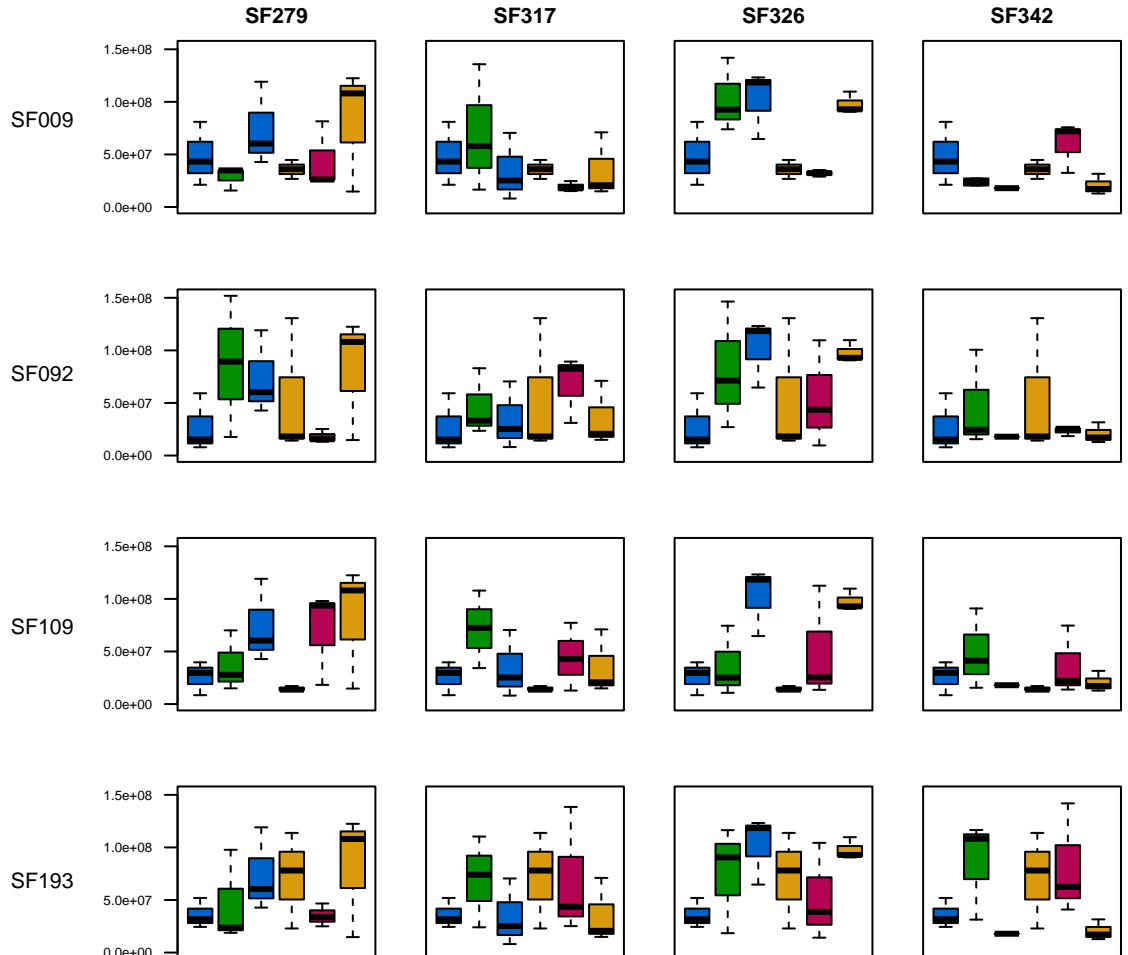

HanXRQChr16g0497911  
Probable nucleoside diphosphate kinase  
2, chloroplastic

Parents WW  
Parents WD  
Hybrids WW  
Hybrids WD

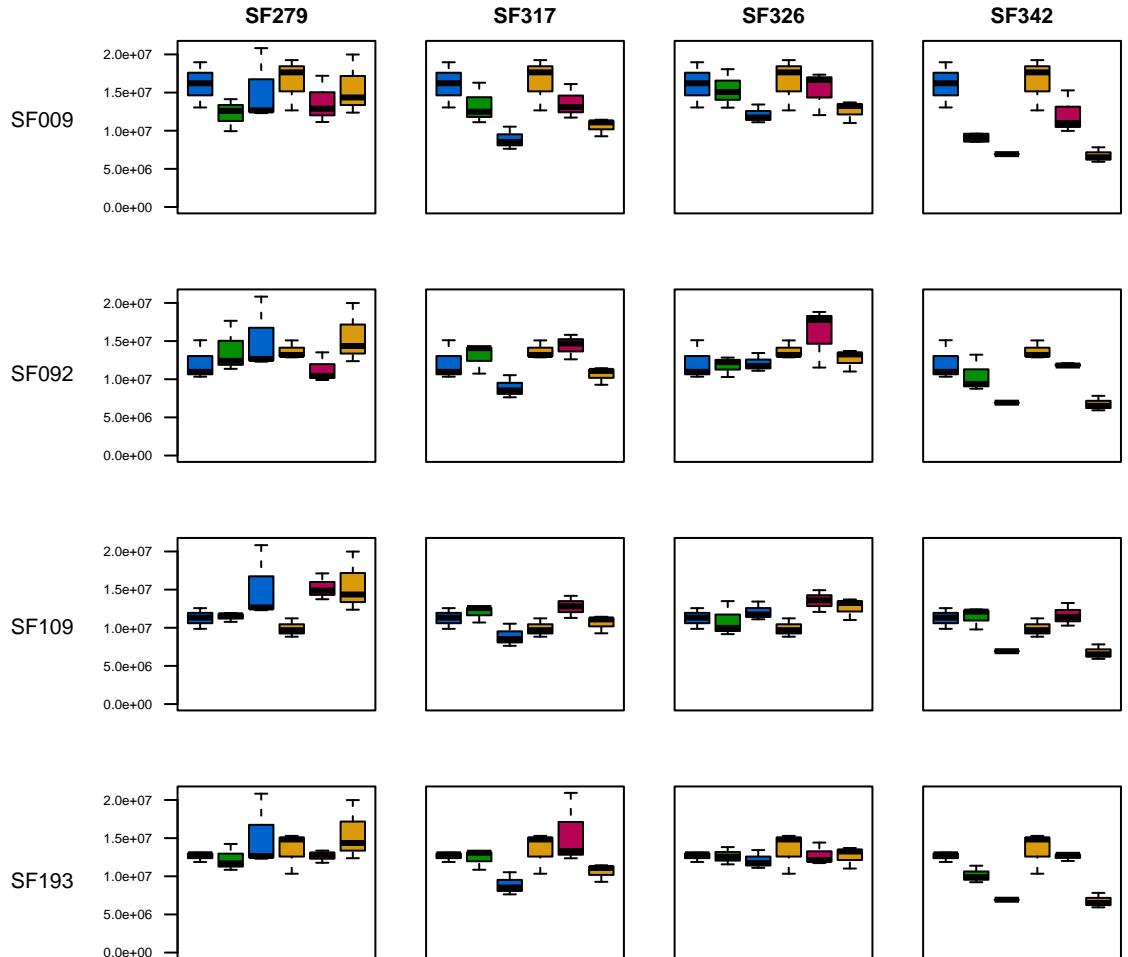

HanXRQChr07g0206941  
Probable class II aaRS and biotin  
synthetases superfamily protein

Parents WW  
Parents WD  
Hybrids WW  
Hybrids WD

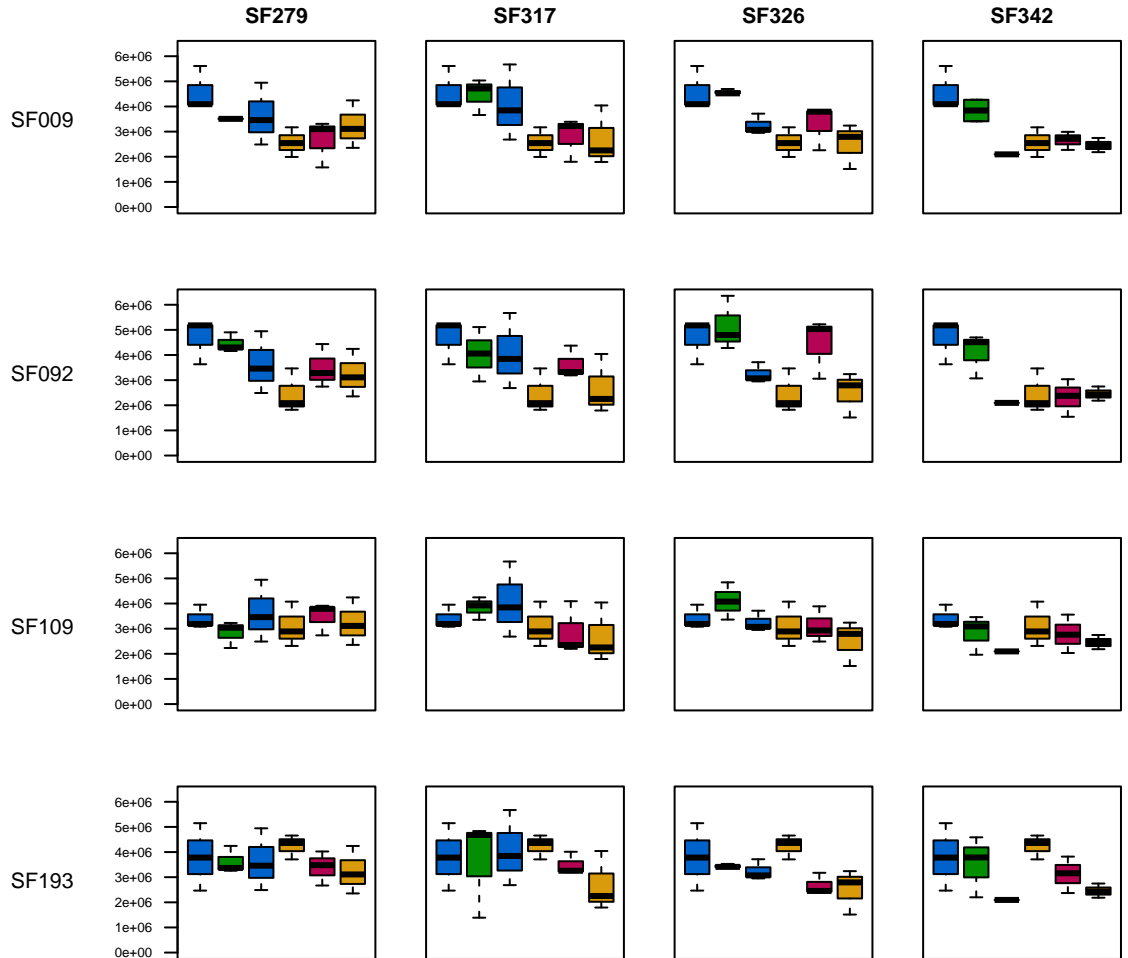

HanXRQChr06g0166981  
Probable VIRB2-interacting protein 1

Parents WW  
Parents WD  
Hybrids WW  
Hybrids WD

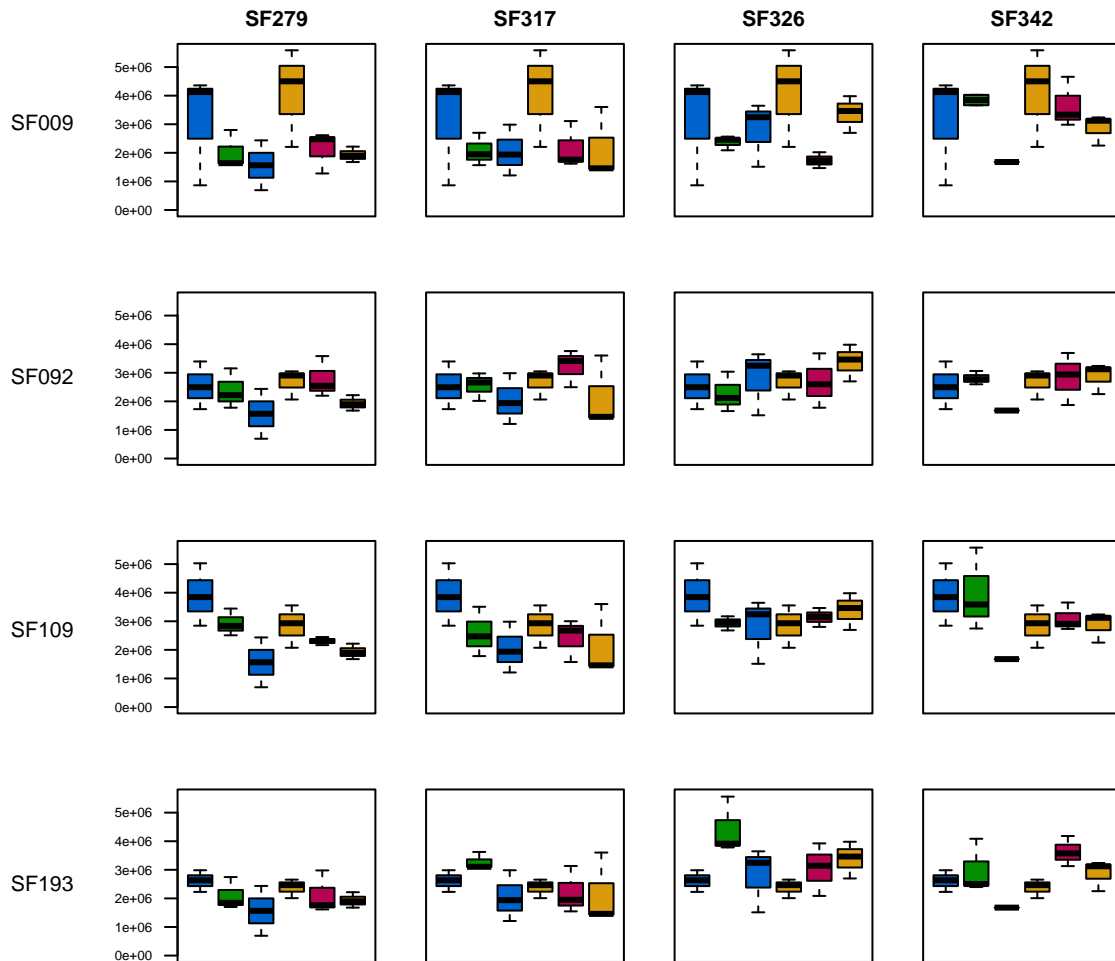

HanXRQChr15g0470901  
Putative annexin

Parents WW  
Parents WD  
Hybrids WW  
Hybrids WD

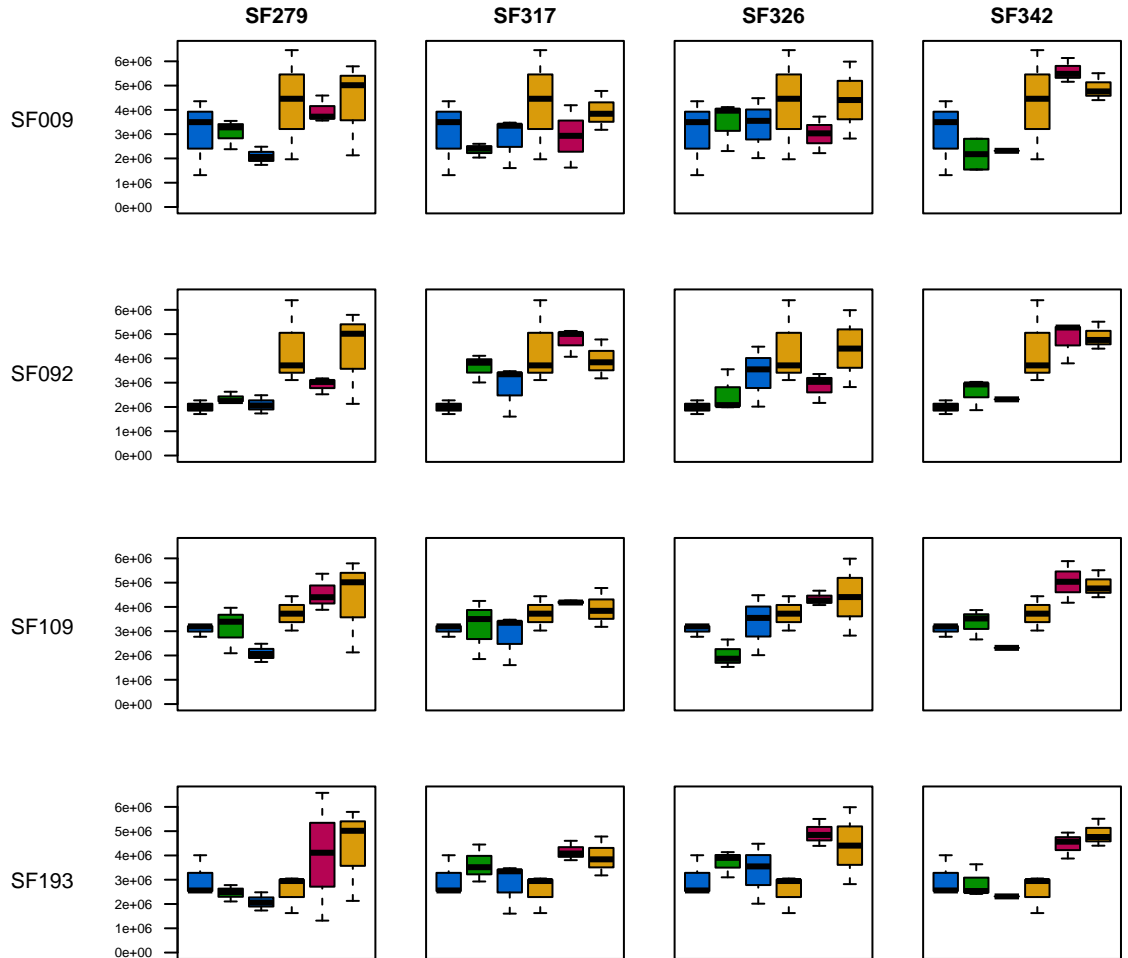

HanXRQChr09g0249071  
Probable stromal 70 kDa heat  
shock-related protein, chloroplastic

Parents WW  
Parents WD  
Hybrids WW  
Hybrids WD

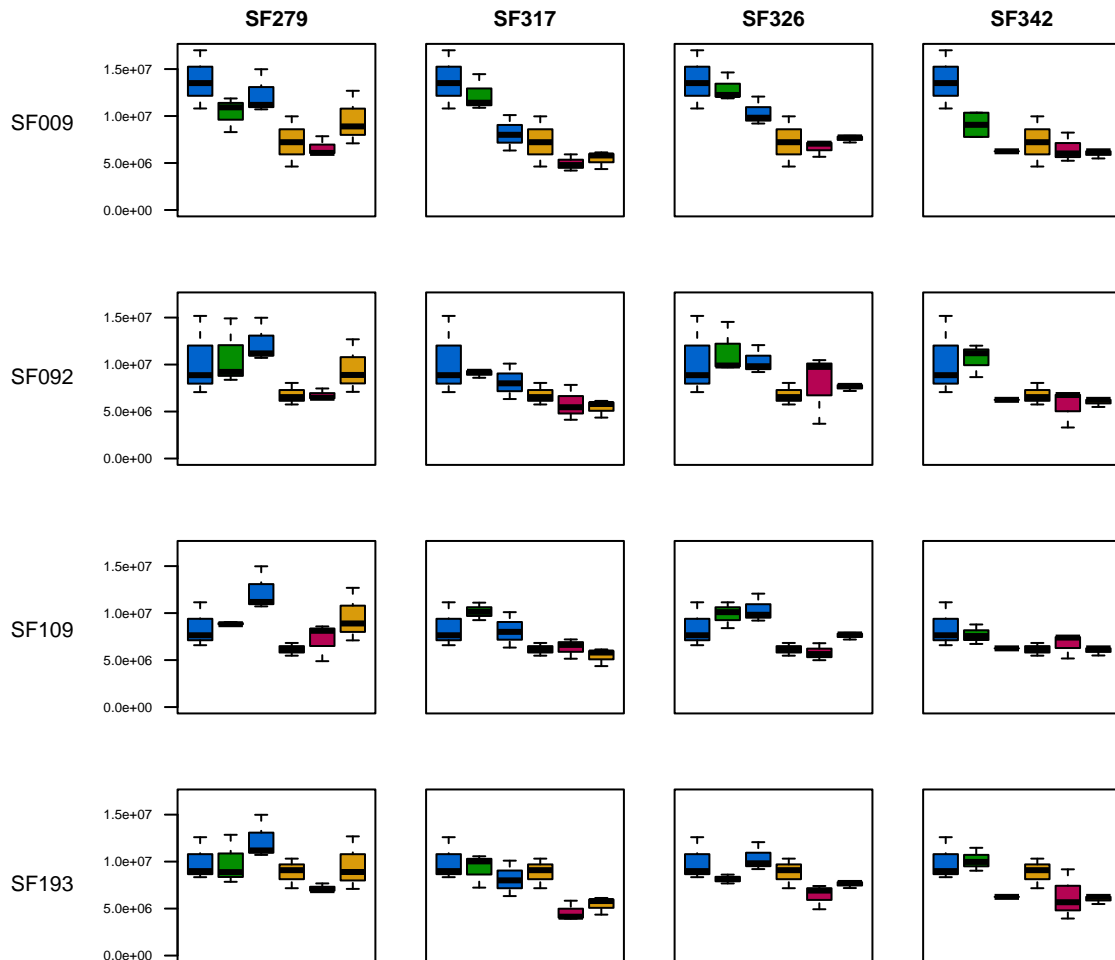

HanXRQChr01g0023951  
Probable NAD(P)-binding Rossmann-fold  
superfamily protein

Parents WW  
Parents WD  
Hybrids WW  
Hybrids WD

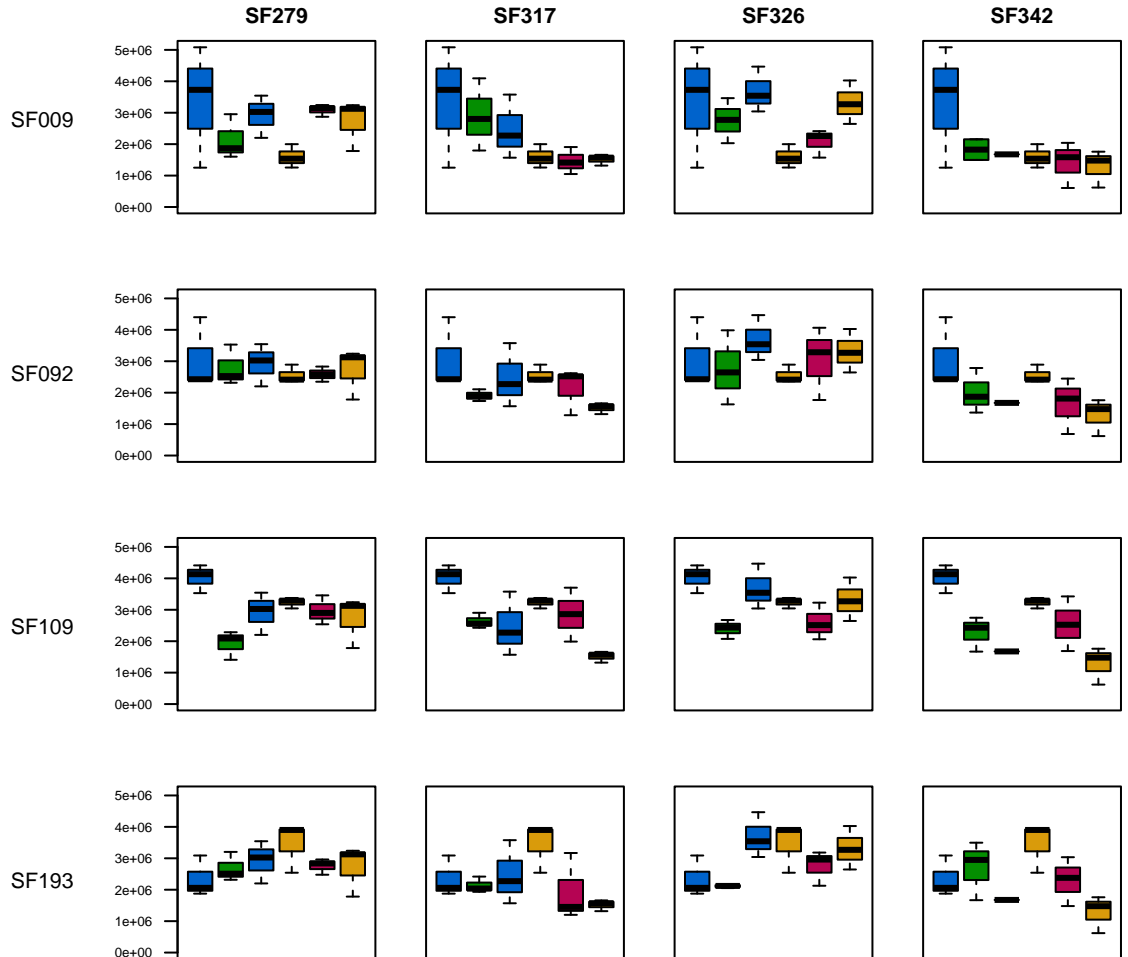

HanXRQChr03g0085971  
Probable isoprenoid F

Parents WW  
Parents WD  
Hybrids WW  
Hybrids WD

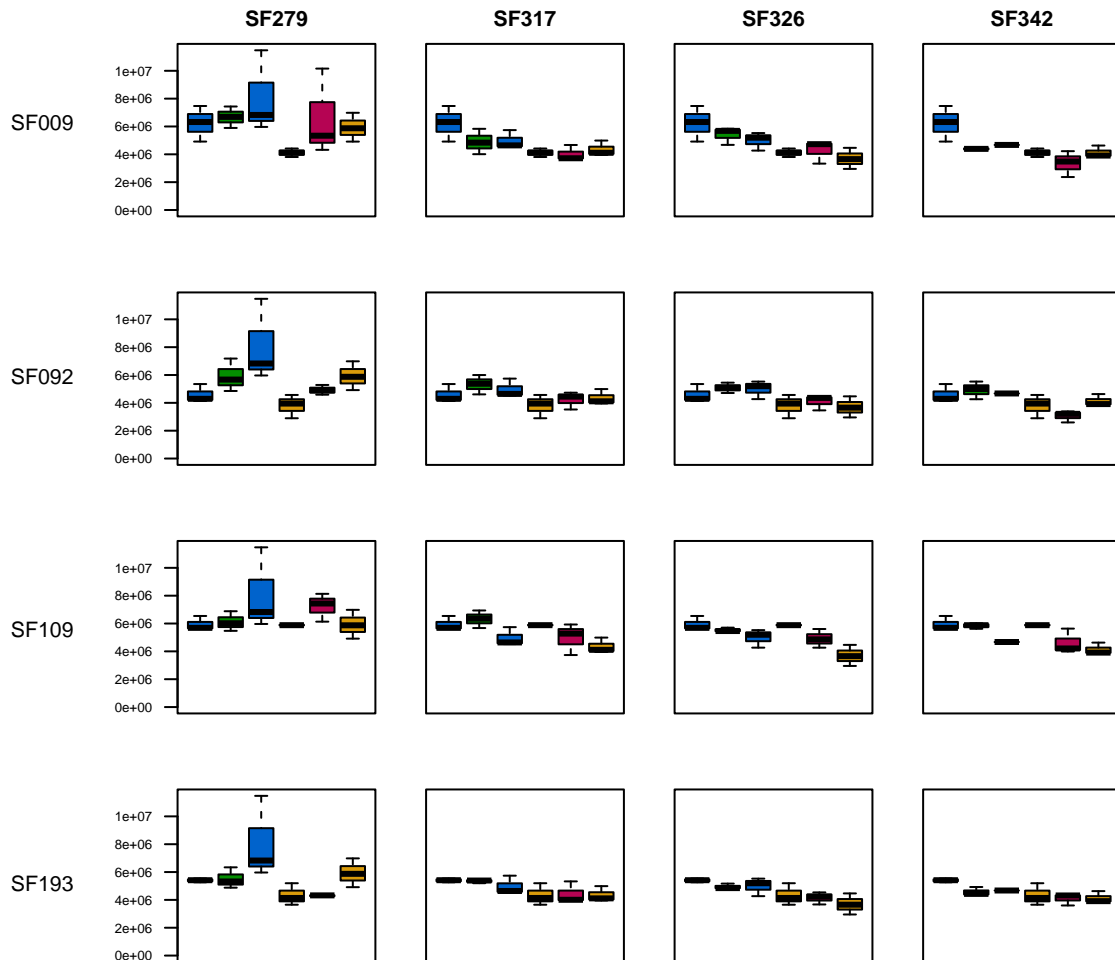



HanXRQChr16g0498931  
Putative glycoside hydrolase family 38,  
N-terminal domain; Galactose mutarotase-

Parents WW  
Parents WD  
Hybrids WW  
Hybrids WD

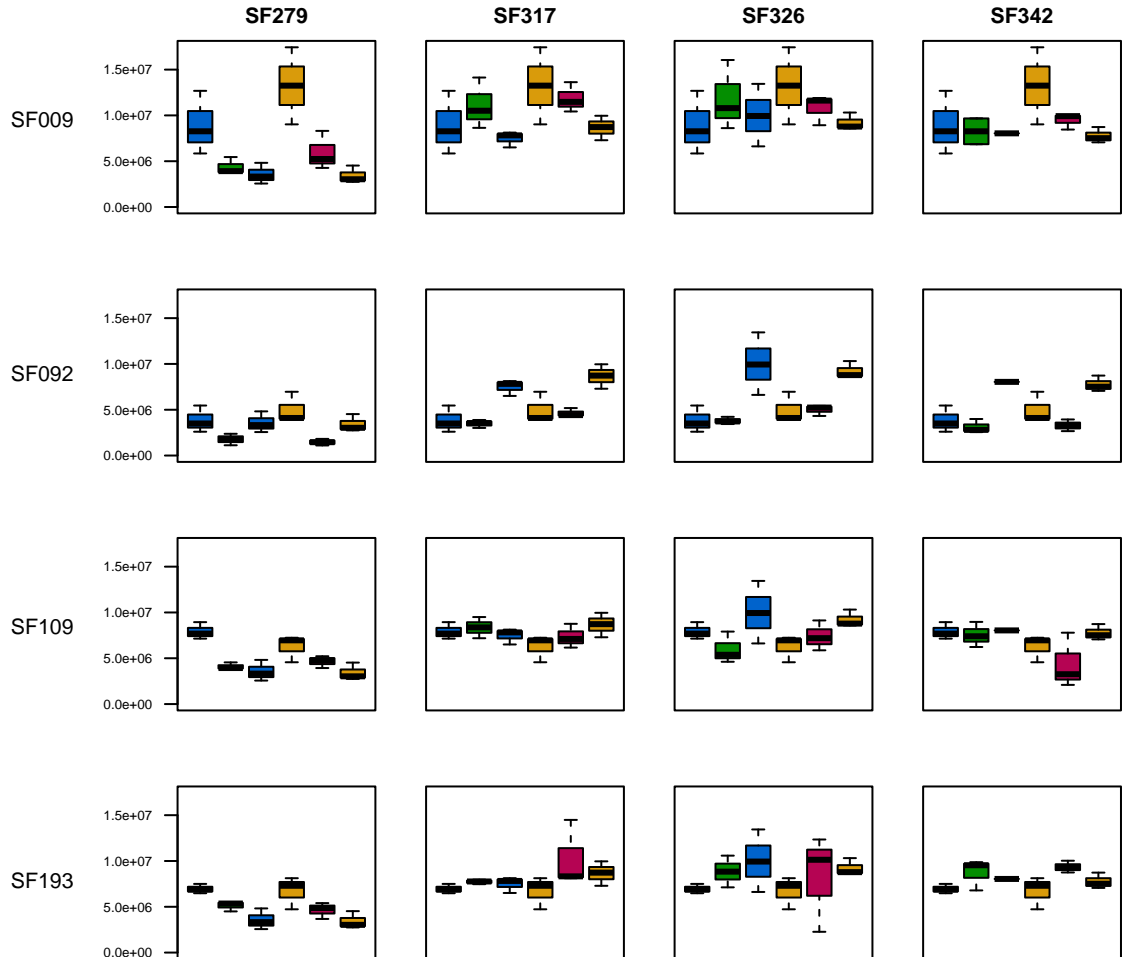

HanXRQChr05g0136241  
Probable pyridoxal phosphate  
(PLP)-dependent transferases superfamily

Parents WW  
Parents WD  
Hybrids WW  
Hybrids WD

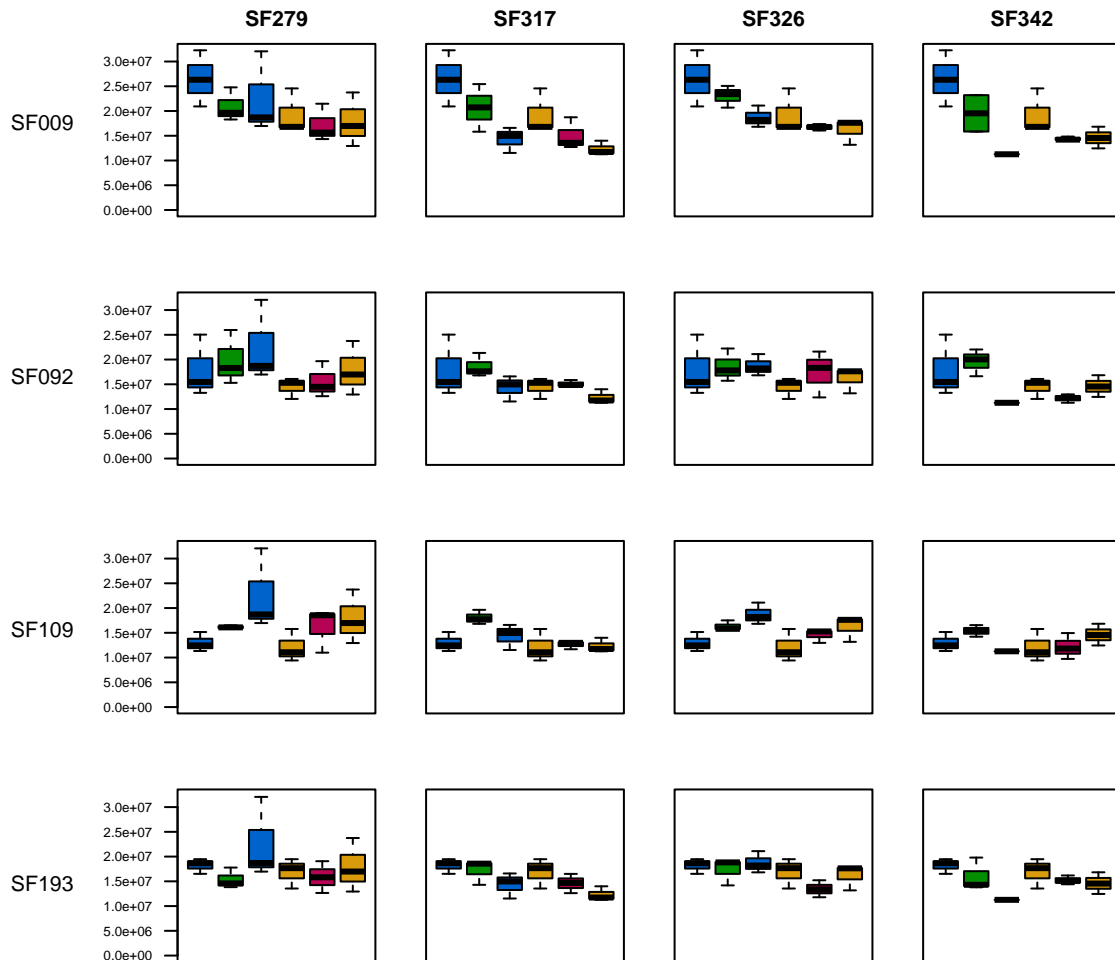

HanXRQChr10g0298981  
Putative cyclophilin-type  
peptidyl-prolyl cis-trans isomerase domain

Parents WW  
Parents WD  
Hybrids WW  
Hybrids WD

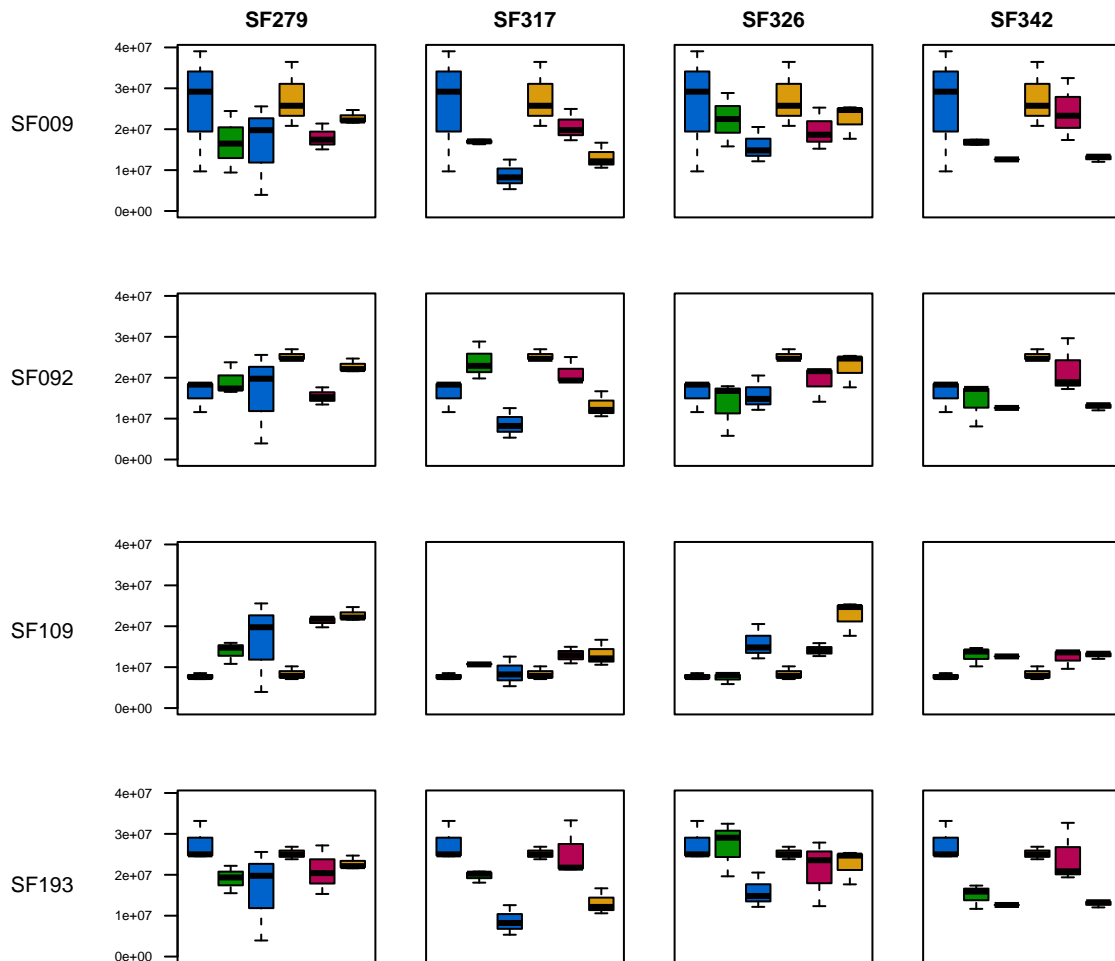

HanXRQChr10g0313581  
Probable chaperonin 60 beta

Parents WW  
Parents WD  
Hybrids WW  
Hybrids WD

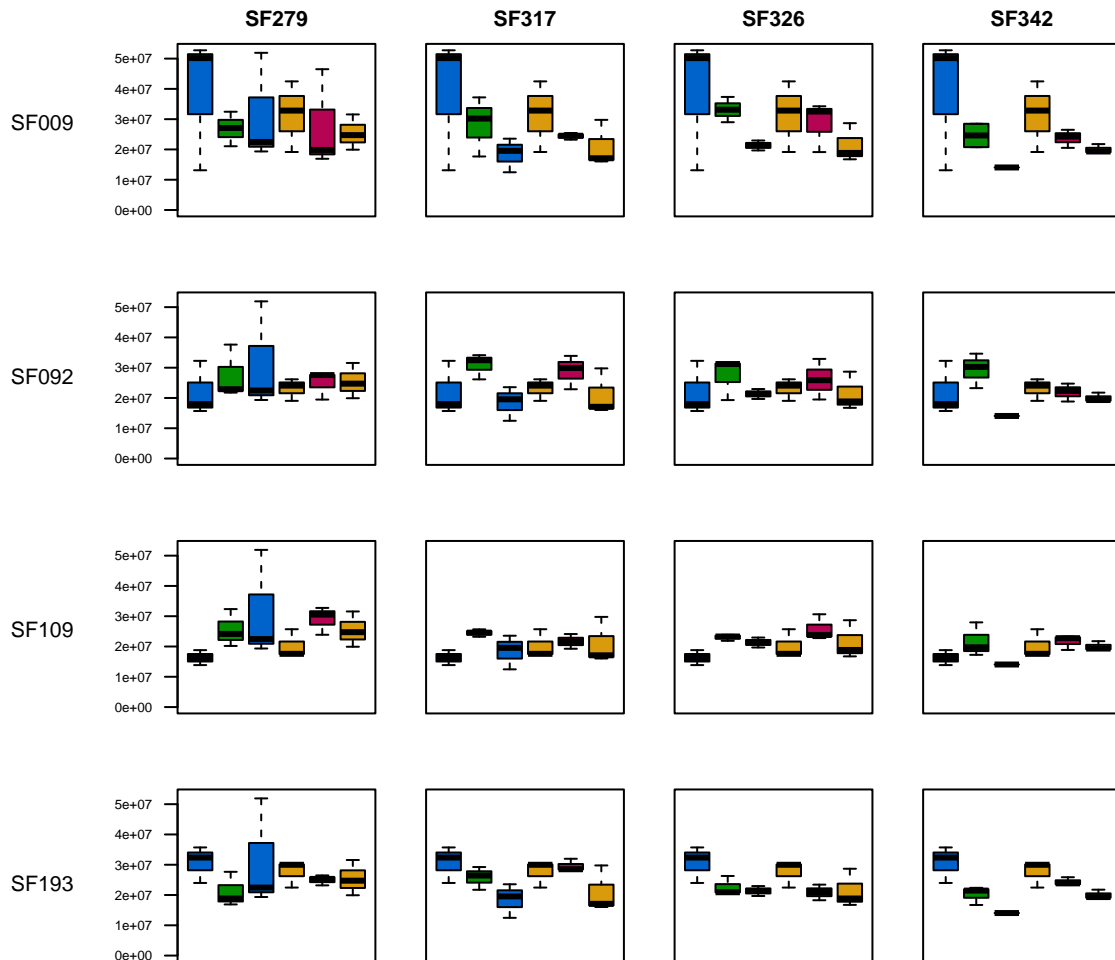

HanXRQChr04g0122721  
Probable transketolase, chloroplastic

Parents WW  
Parents WD  
Hybrids WW  
Hybrids WD

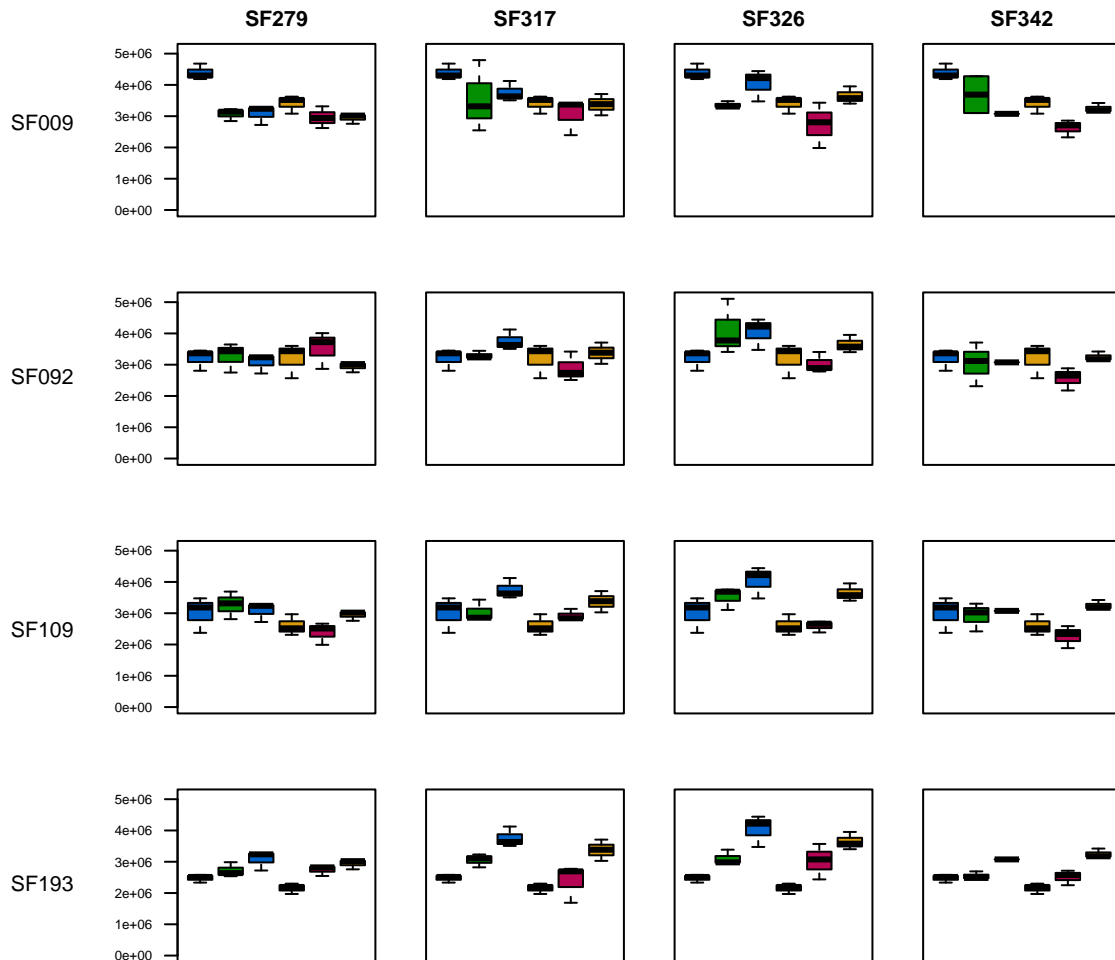

HanXRQChr03g0074621  
Probable isoflavone reductase homolog

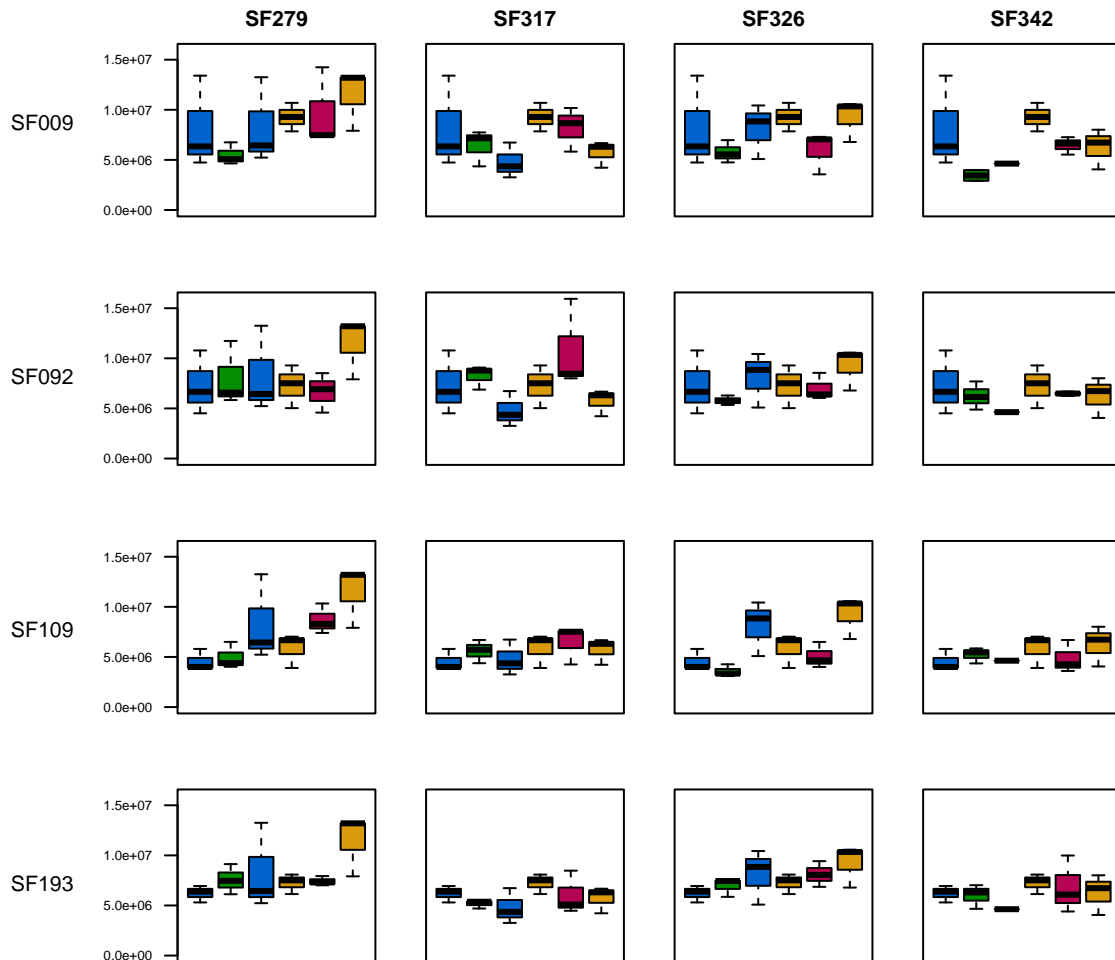

HanXRQCPg0580281  
Putative ribosomal protein S5/S7;  
Ribosomal protein S7 domain

Parents WW  
Parents WD  
Hybrids WW  
Hybrids WD

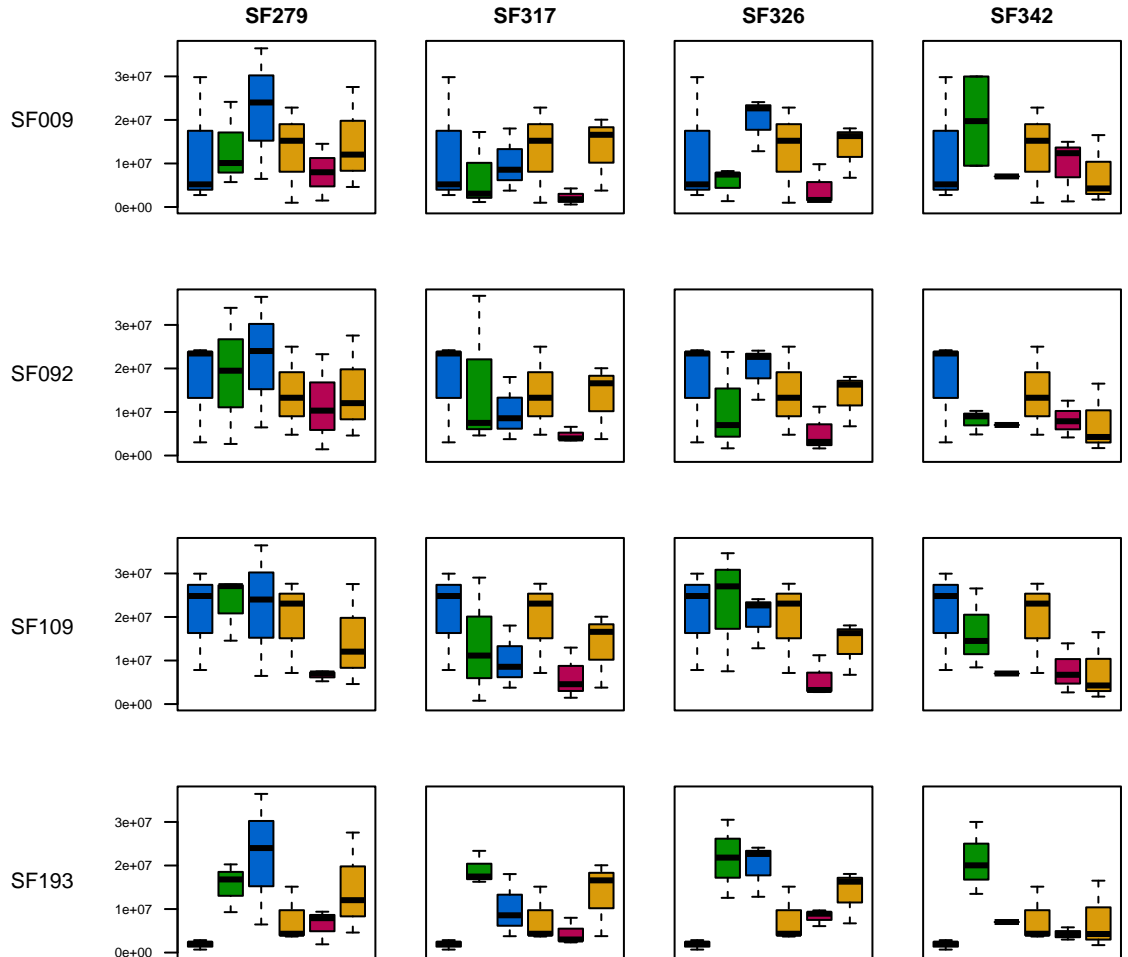

HanXRQChr15g0466211  
Probable FAD/NAD(P)-binding  
oxidoreductase

Parents WW  
Parents WD  
Hybrids WW  
Hybrids WD

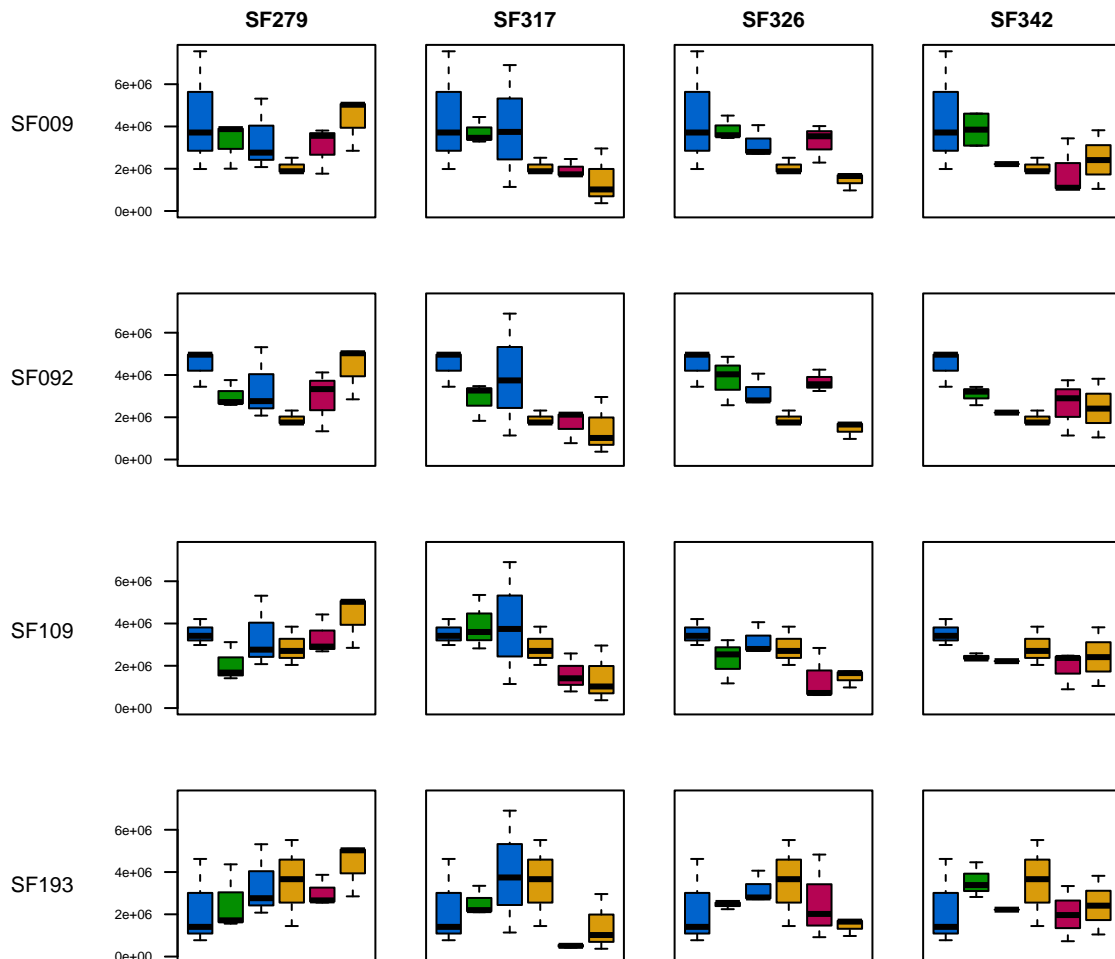



HanXRQChr04g0100351  
Probable aspartyl aminopeptidase

Parents WW  
Parents WD  
Hybrids WW  
Hybrids WD

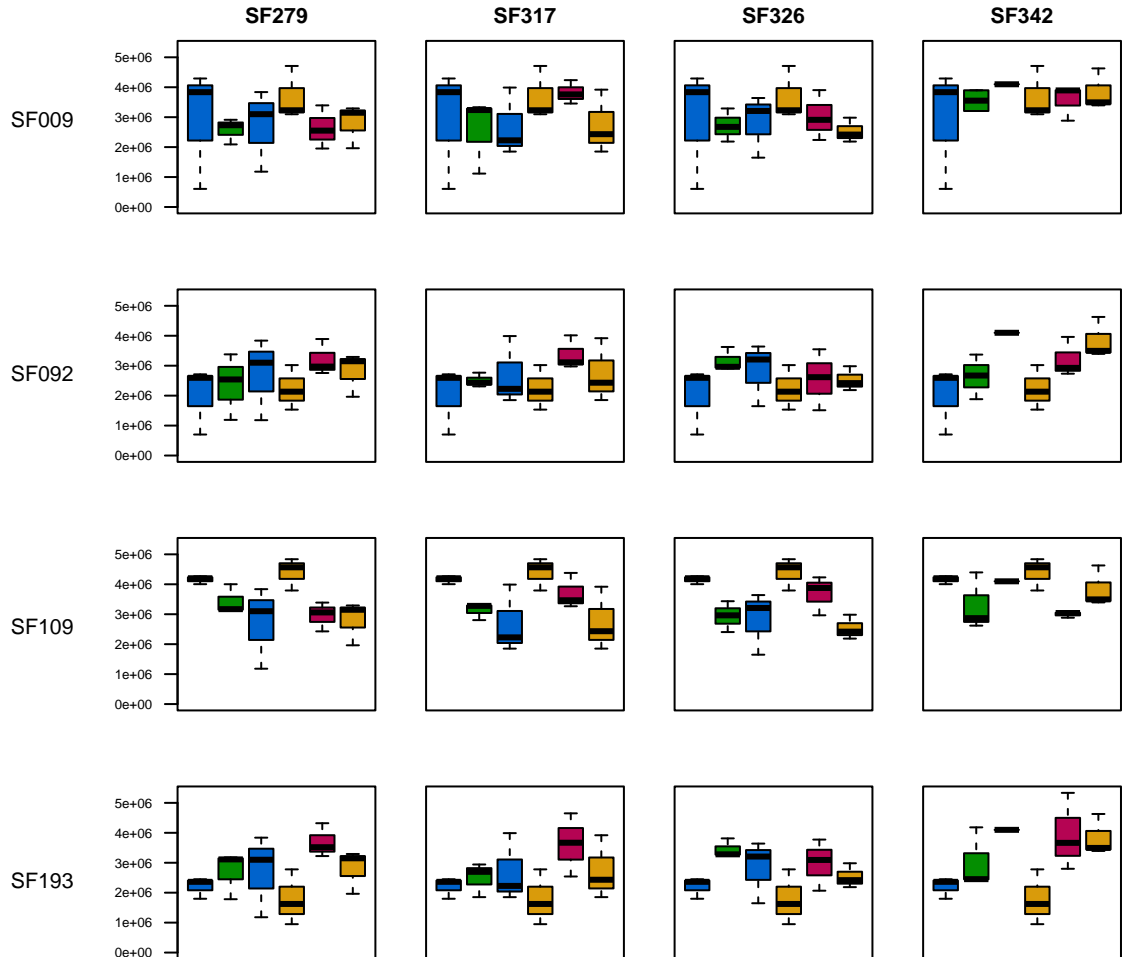

HanXRQChr12g0364341  
Probable 10 kDa heat shock protein,  
mitochondrial

Parents WW  
Parents WD  
Hybrids WW  
Hybrids WD

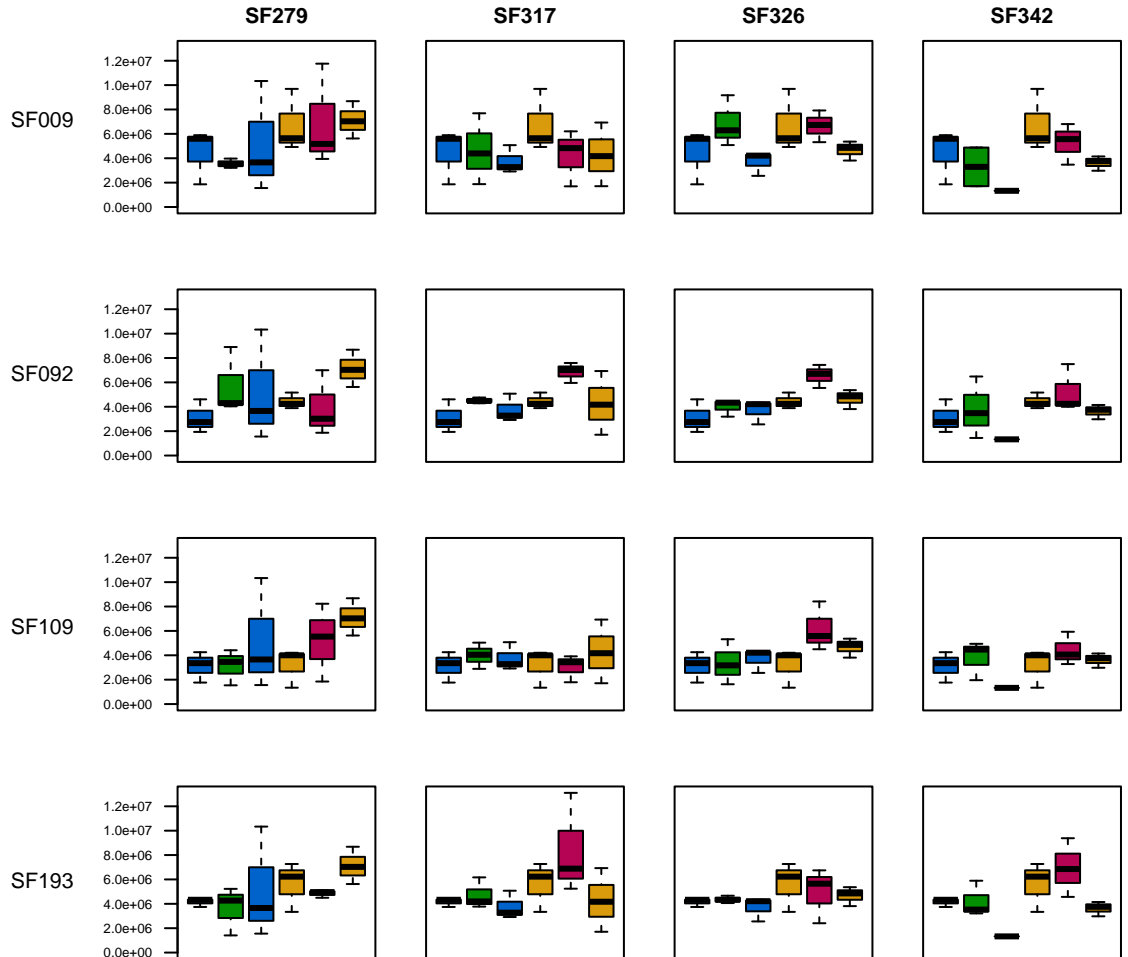

HanXRQChr17g0548081  
 Probable ferredoxin-thioredoxin  
 reductase catalytic chain, chloroplastic

Parents WW  
 Parents WD  
 Hybrids WW  
 Hybrids WD

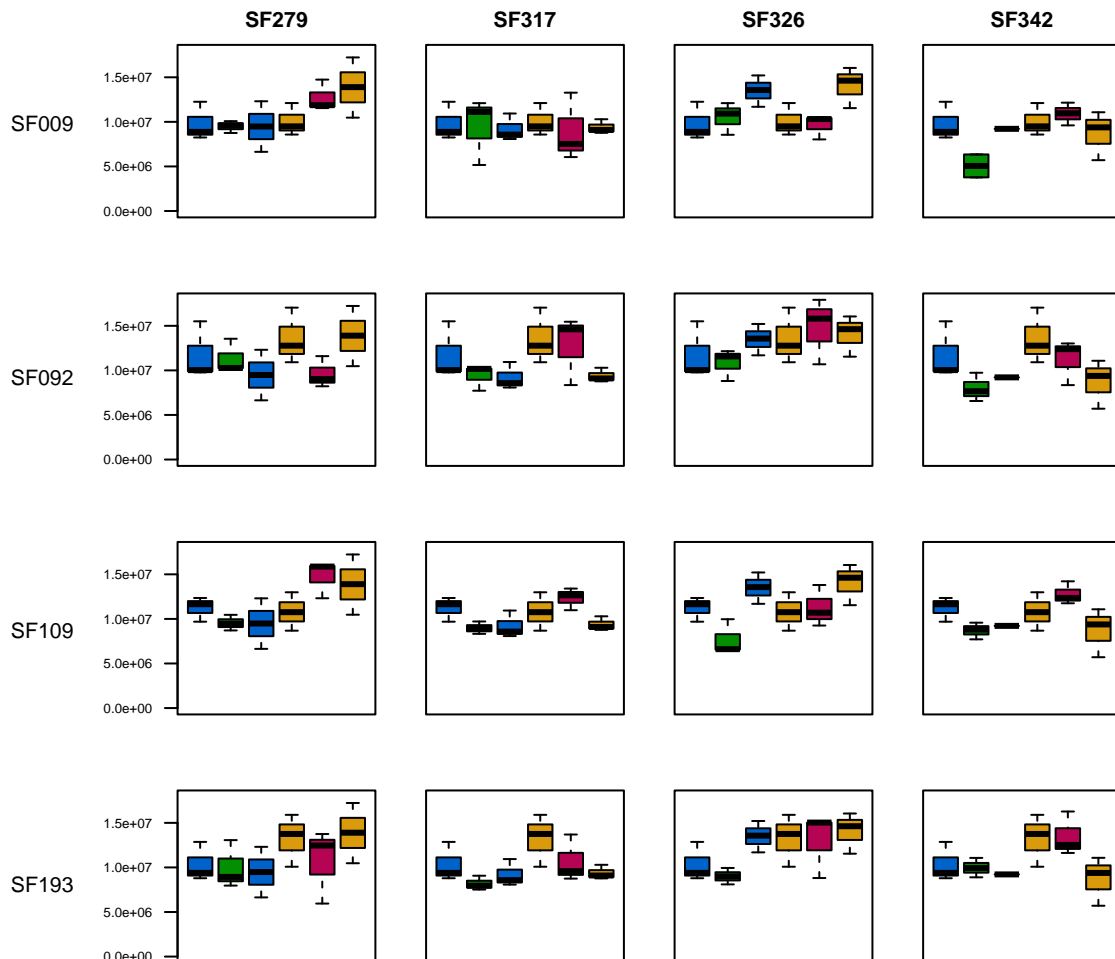

HanXRQChr07g0192731  
Probable inositol-3-phosphate synthase

Parents WW  
Parents WD  
Hybrids WW  
Hybrids WD

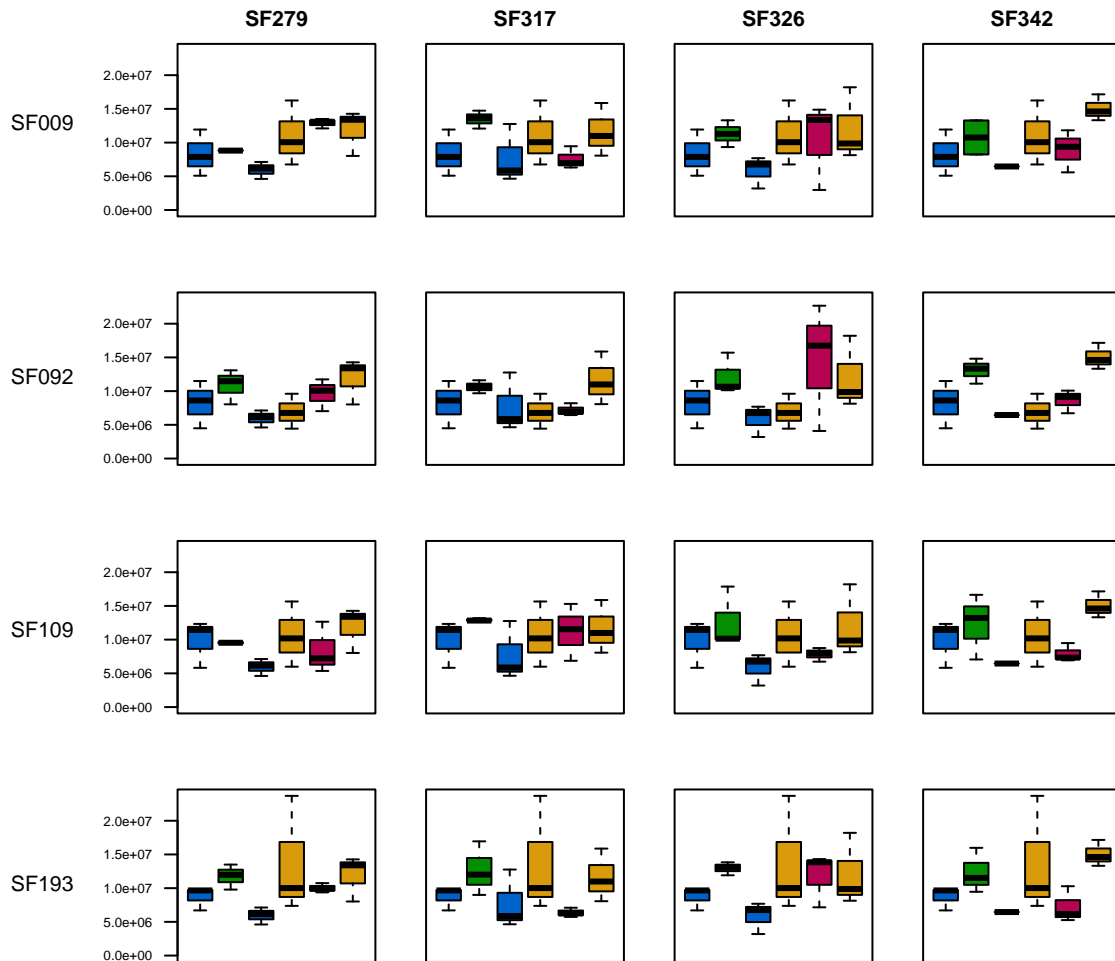

HanXRQChr12g0354491  
Probable lactoylglutathione lyase /  
glyoxalase I family protein

Parents WW  
Parents WD  
Hybrids WW  
Hybrids WD

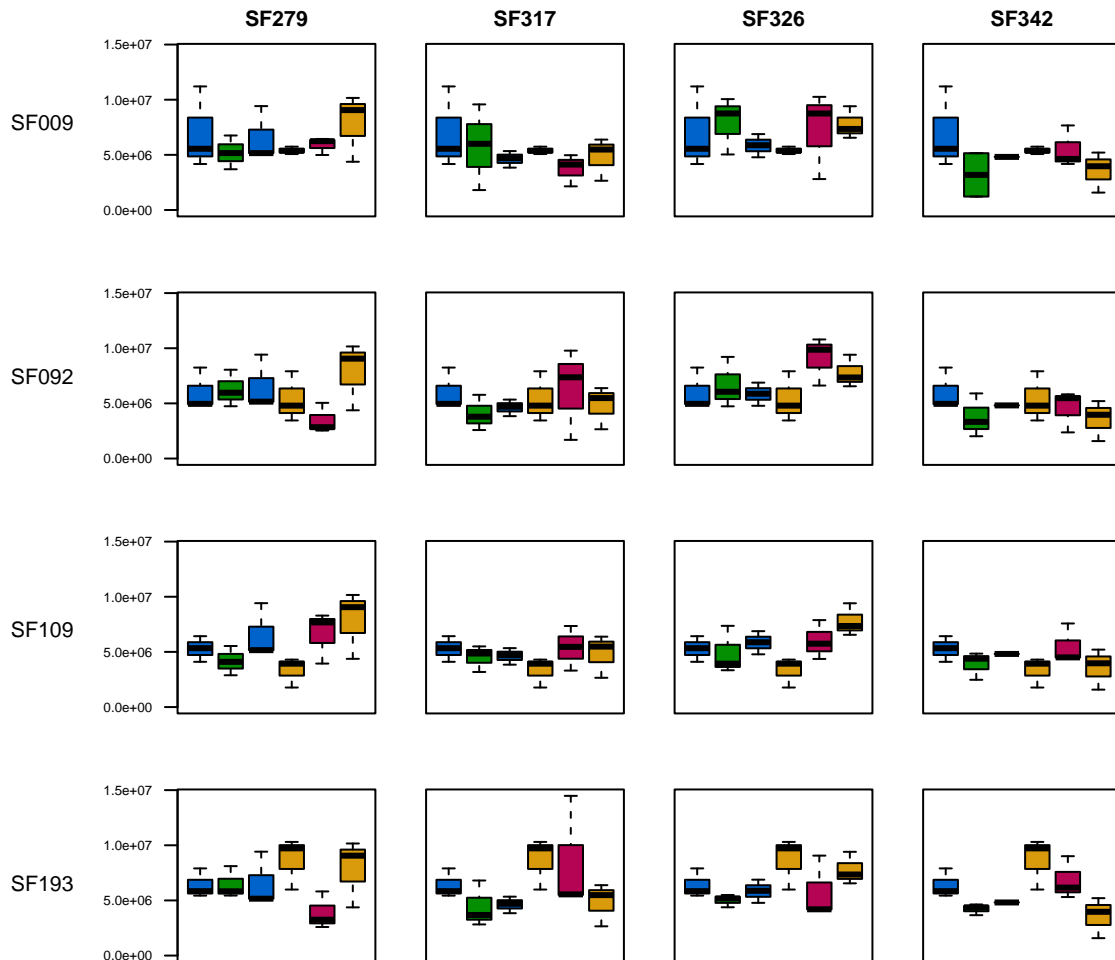

HanXRQChr10g0318011  
Putative ribosomal protein L2;  
Ribosomal protein S19/S15; Ribosomal pro

Parents WW  
Parents WD  
Hybrids WW  
Hybrids WD

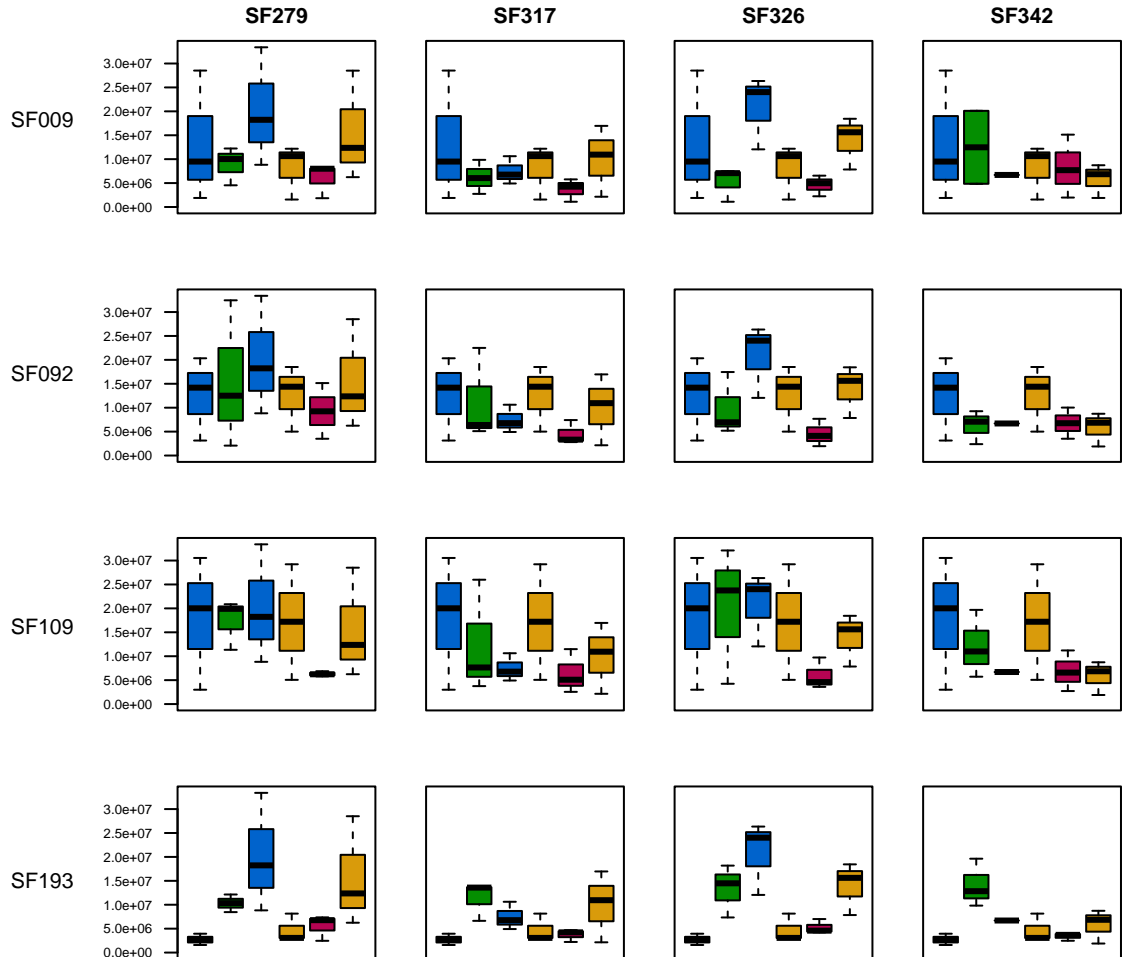

HanXRQChr13g0389921  
Probable dihydrolipoyl dehydrogenase,  
mitochondrial

Parents WW  
Parents WD  
Hybrids WW  
Hybrids WD

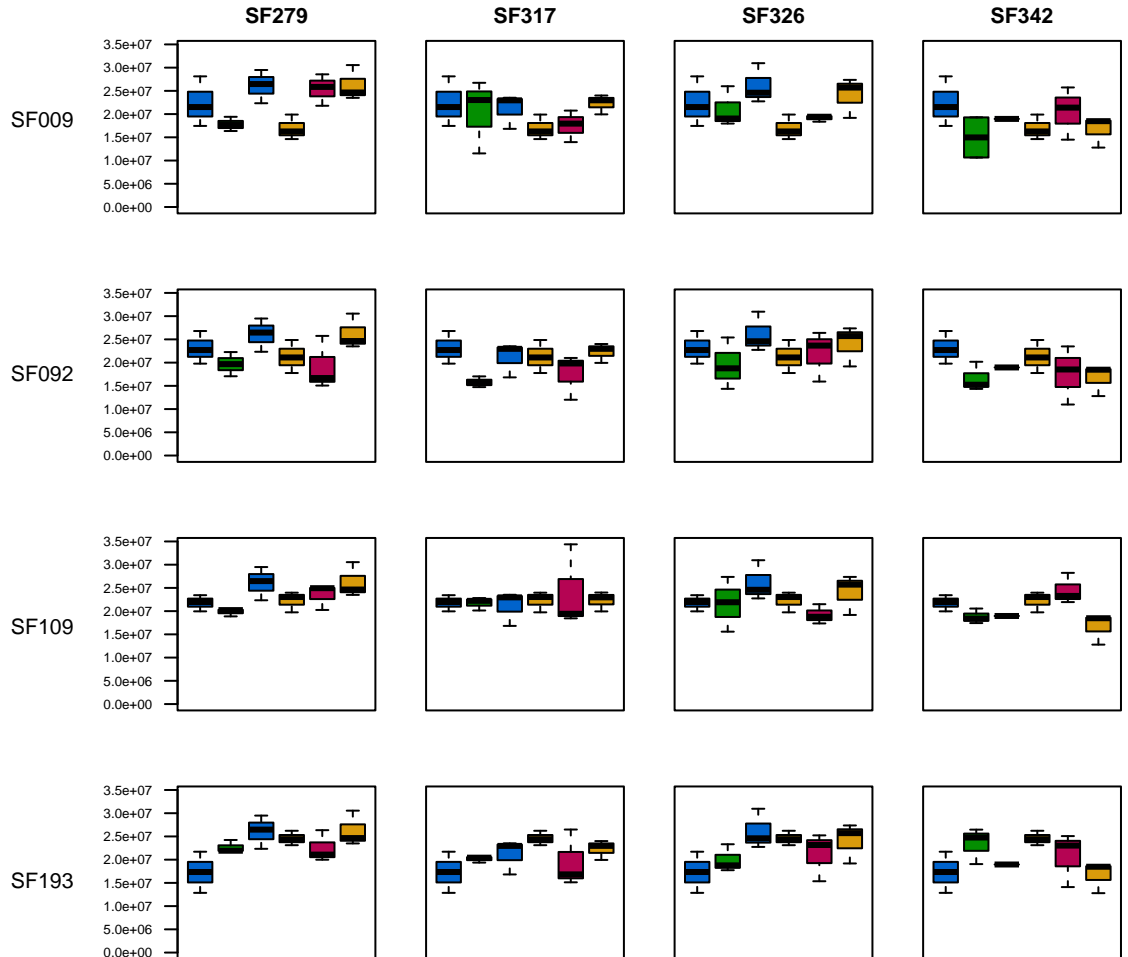

HanXRQChr01g0024071  
 Putative ribosomal protein L1, 2-layer  
 alpha/beta-sandwich; Ribosomal protein L1

Parents WW  
 Parents WD  
 Hybrids WW  
 Hybrids WD

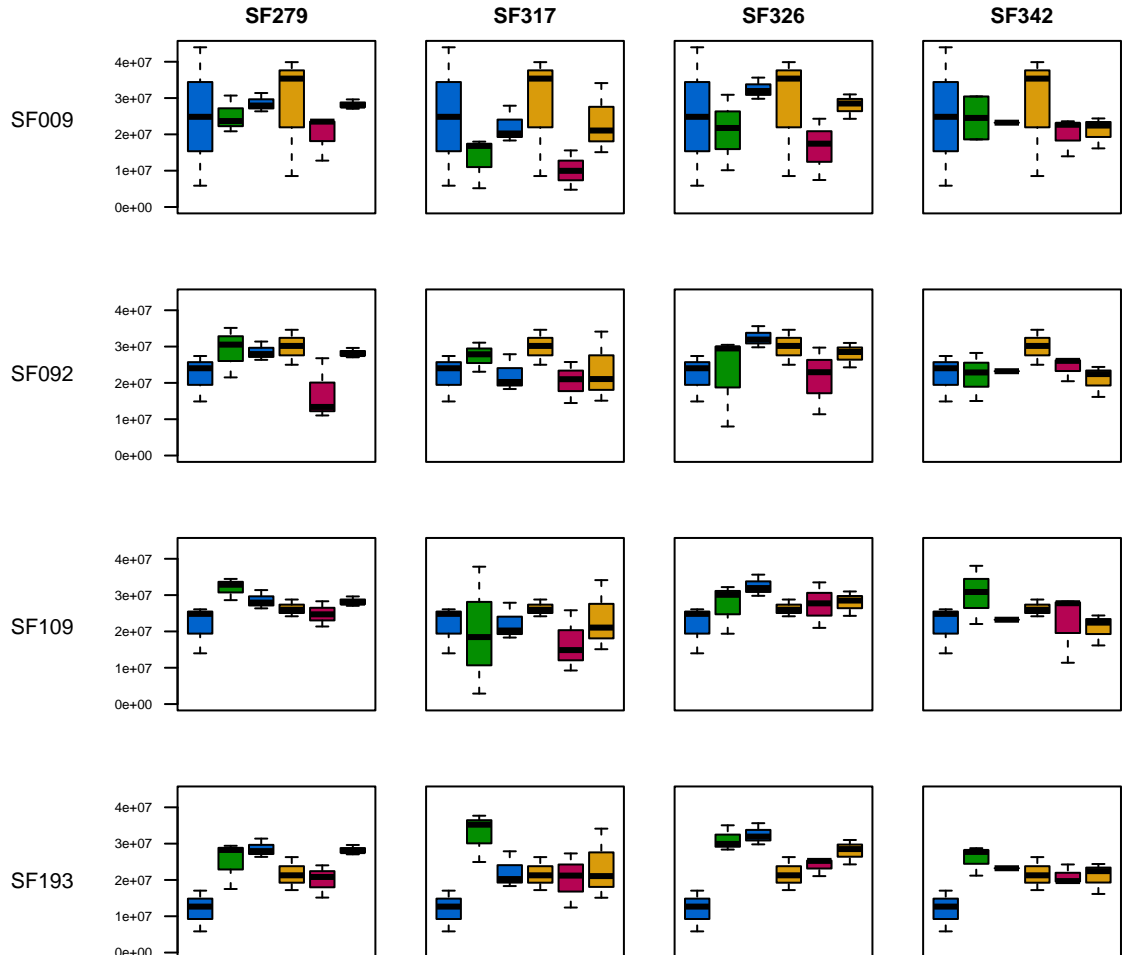



HanXRQChr13g0403031  
Probable ATPase, F0 complex, subunit  
B/B', bacterial/chloroplast

Parents WW  
Parents WD  
Hybrids WW  
Hybrids WD

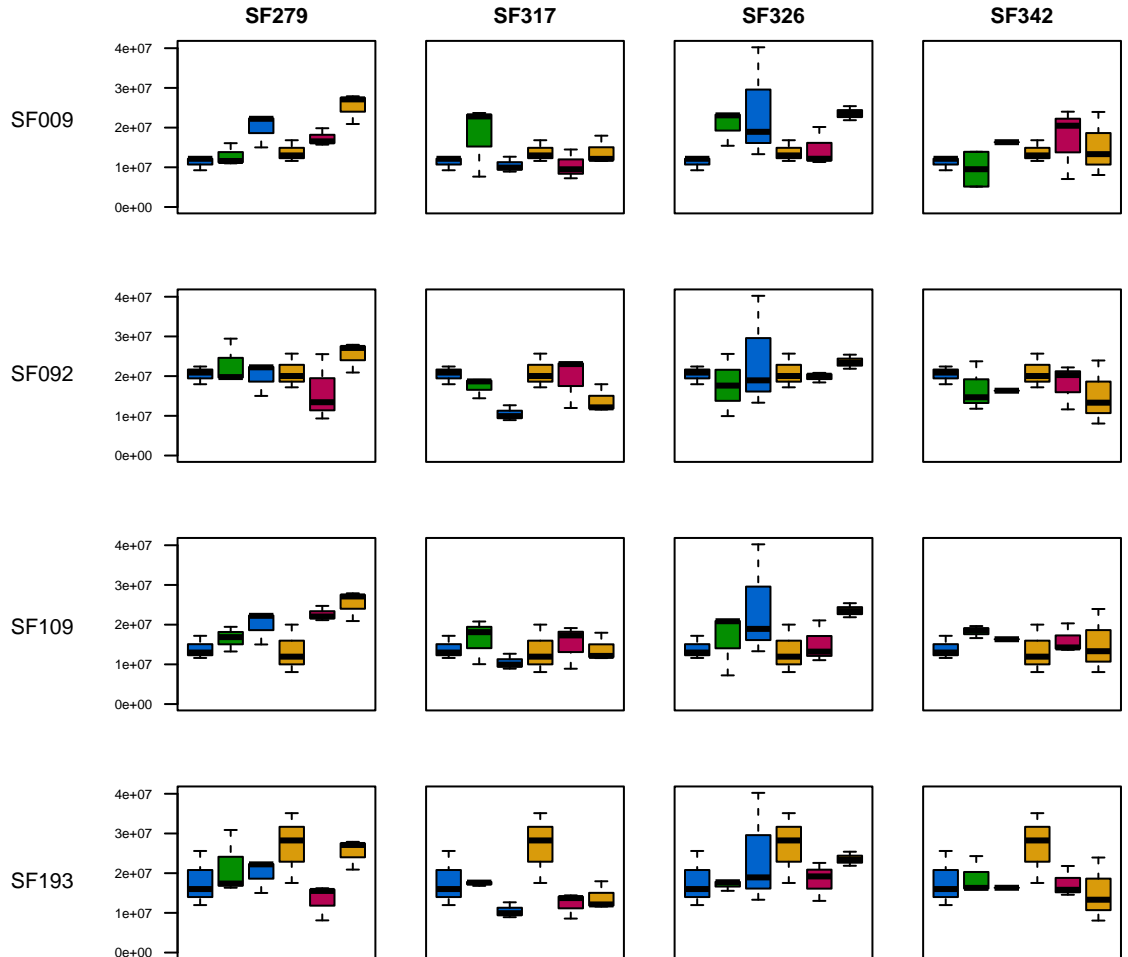

HanXRQChr06g0181661  
Probable 1,4-alpha-glucan-branching  
enzyme 1, chloroplastic/amyloplastic

Parents WW  
Parents WD  
Hybrids WW  
Hybrids WD

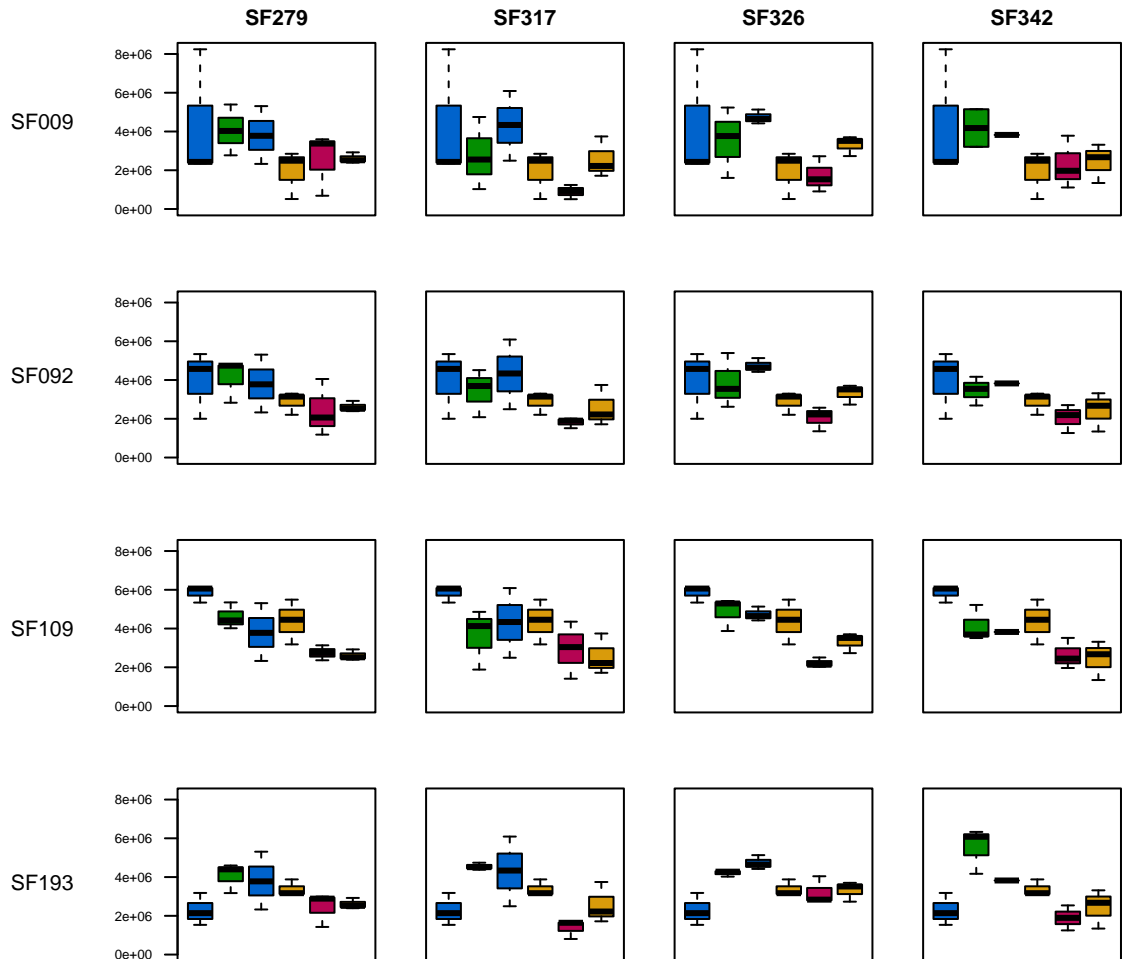

HanXRQChr09g0265511  
Putative porin domain; Eukaryotic  
porin/Tom40

Parents WW  
Parents WD  
Hybrids WW  
Hybrids WD

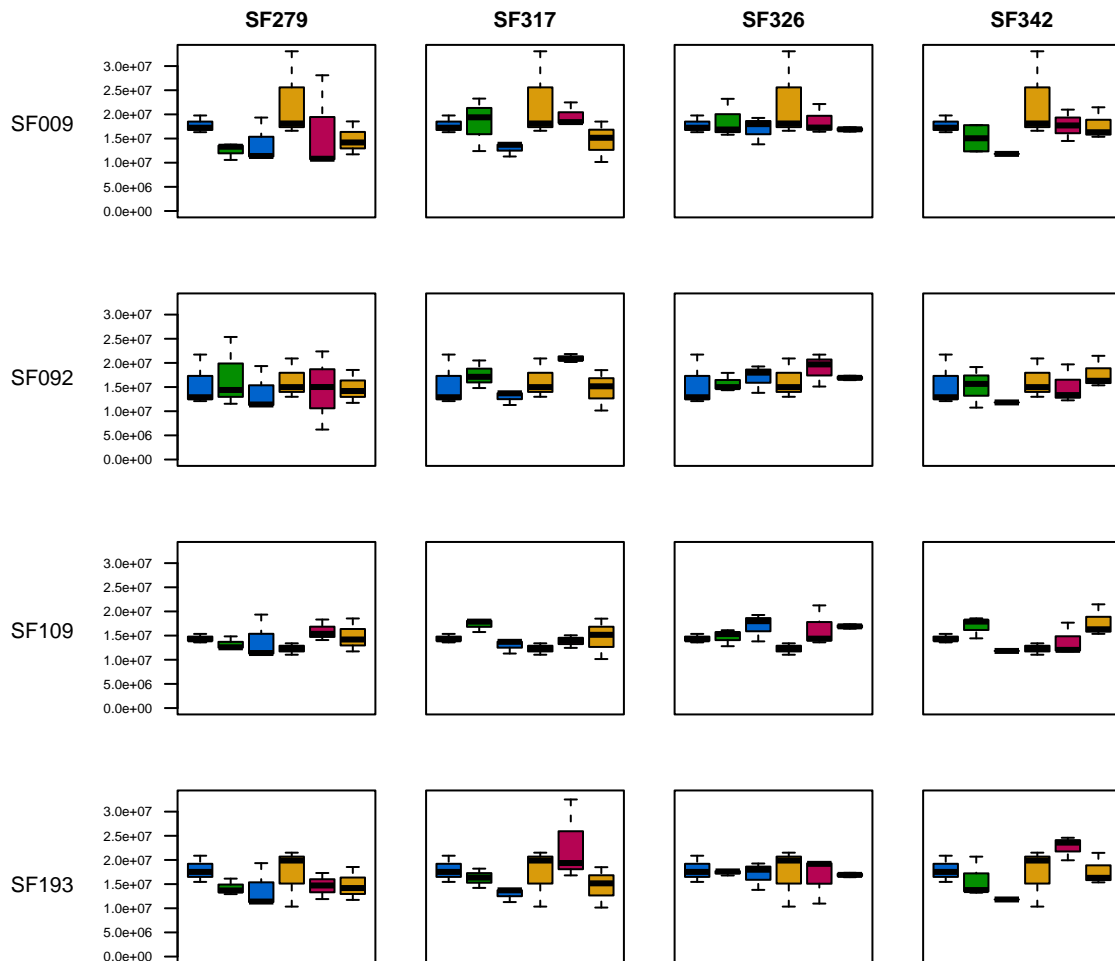

HanXRQChr07g0201581  
Probable cucumisin

Parents WW  
Parents WD  
Hybrids WW  
Hybrids WD

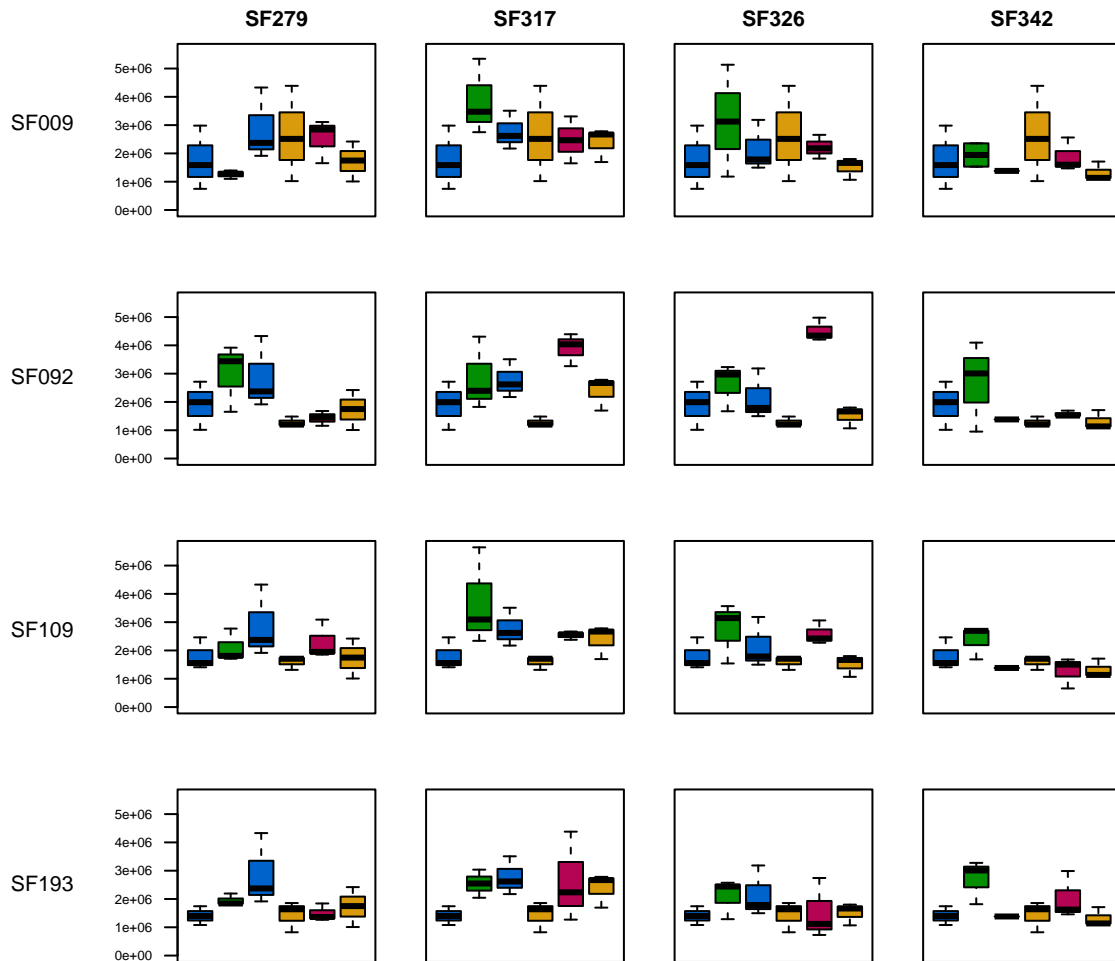

HanXRQChr01g0008121  
Probable chloroplast RNA binding

Parents WW  
Parents WD  
Hybrids WW  
Hybrids WD

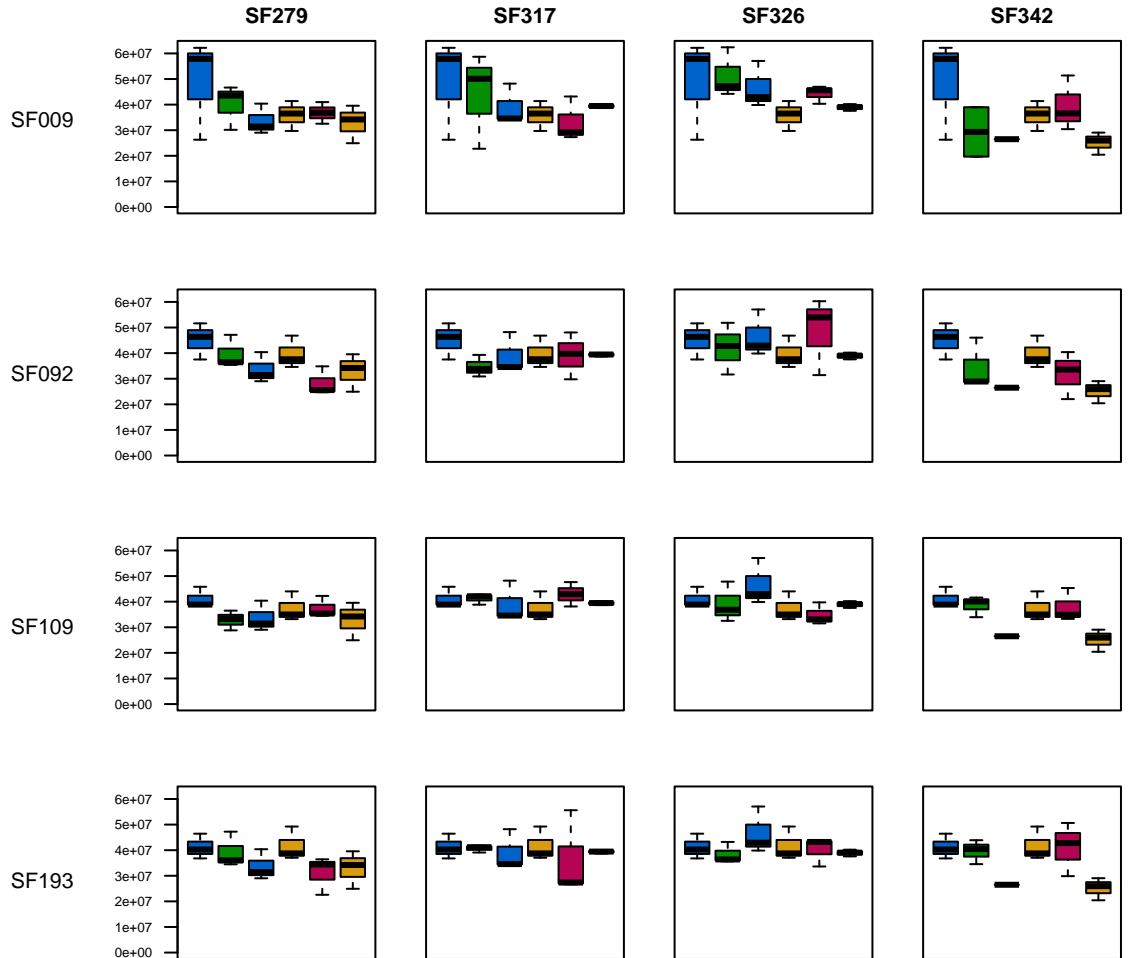

HanXRQChr10g0281451  
Probable glutathione reductase,  
chloroplastic

Parents WW  
Parents WD  
Hybrids WW  
Hybrids WD

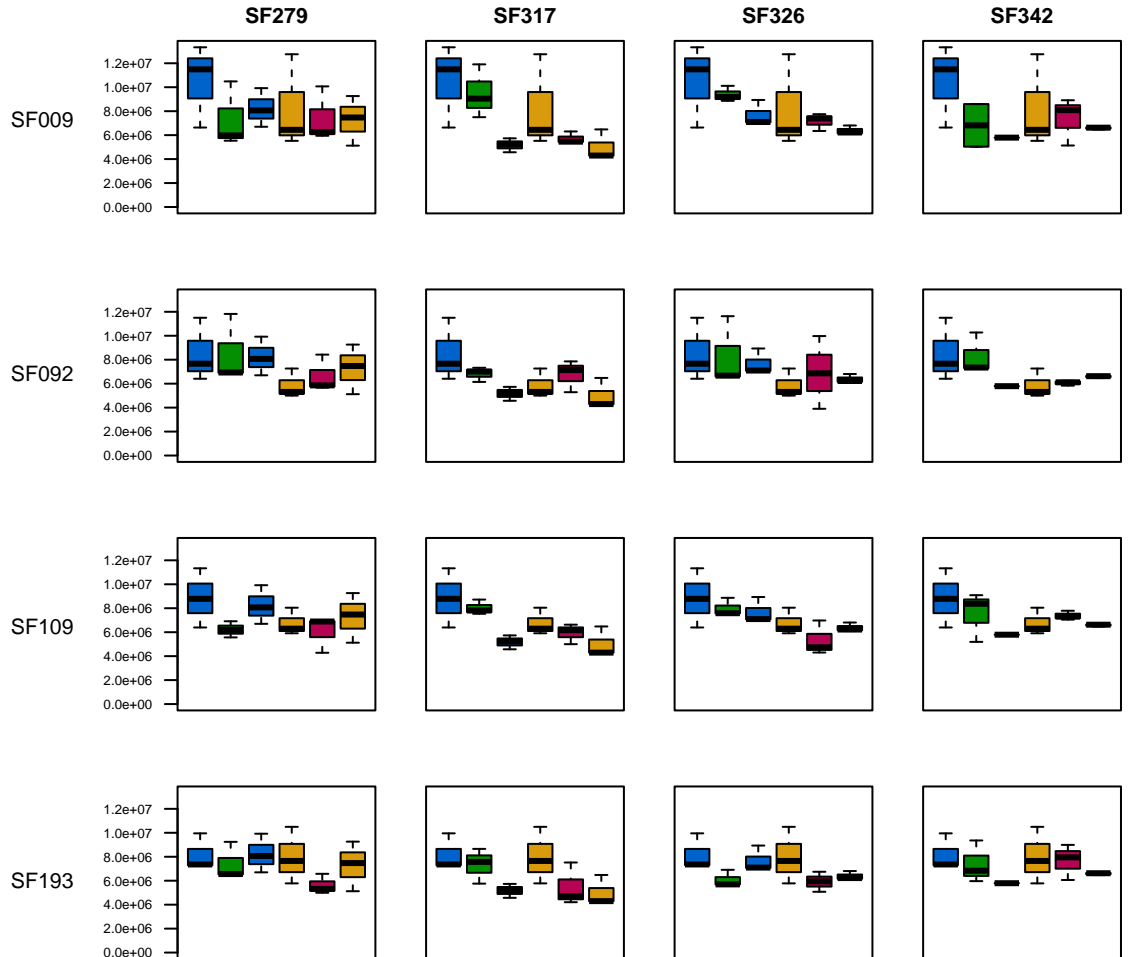

HanXRQChr14g0460421  
Probable regulatory particle non-ATPase  
12A

Parents WW  
Parents WD  
Hybrids WW  
Hybrids WD

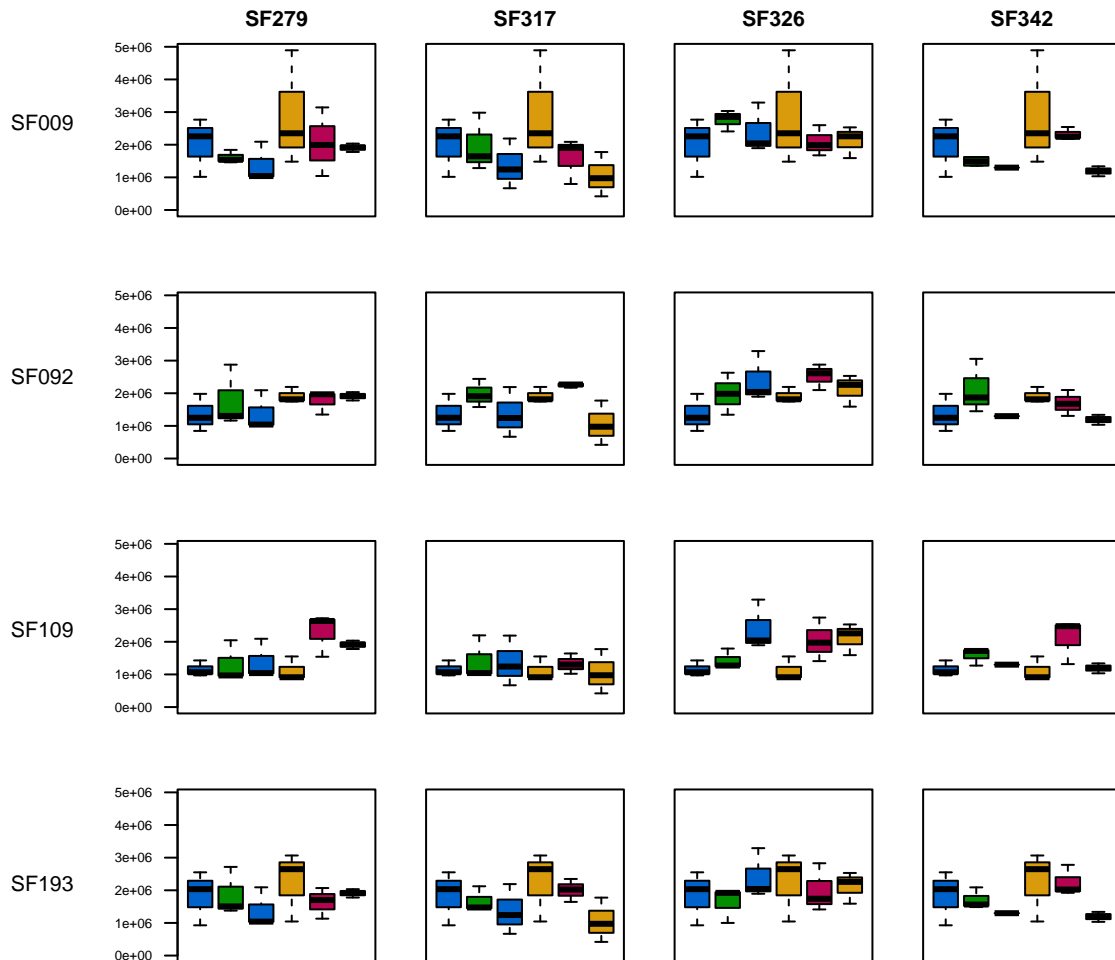

HanXRQChr01g0005951  
Putative chlorophyll A-B binding  
protein; Chlorophyll a/b binding protein dom

Parents WW  
Parents WD  
Hybrids WW  
Hybrids WD

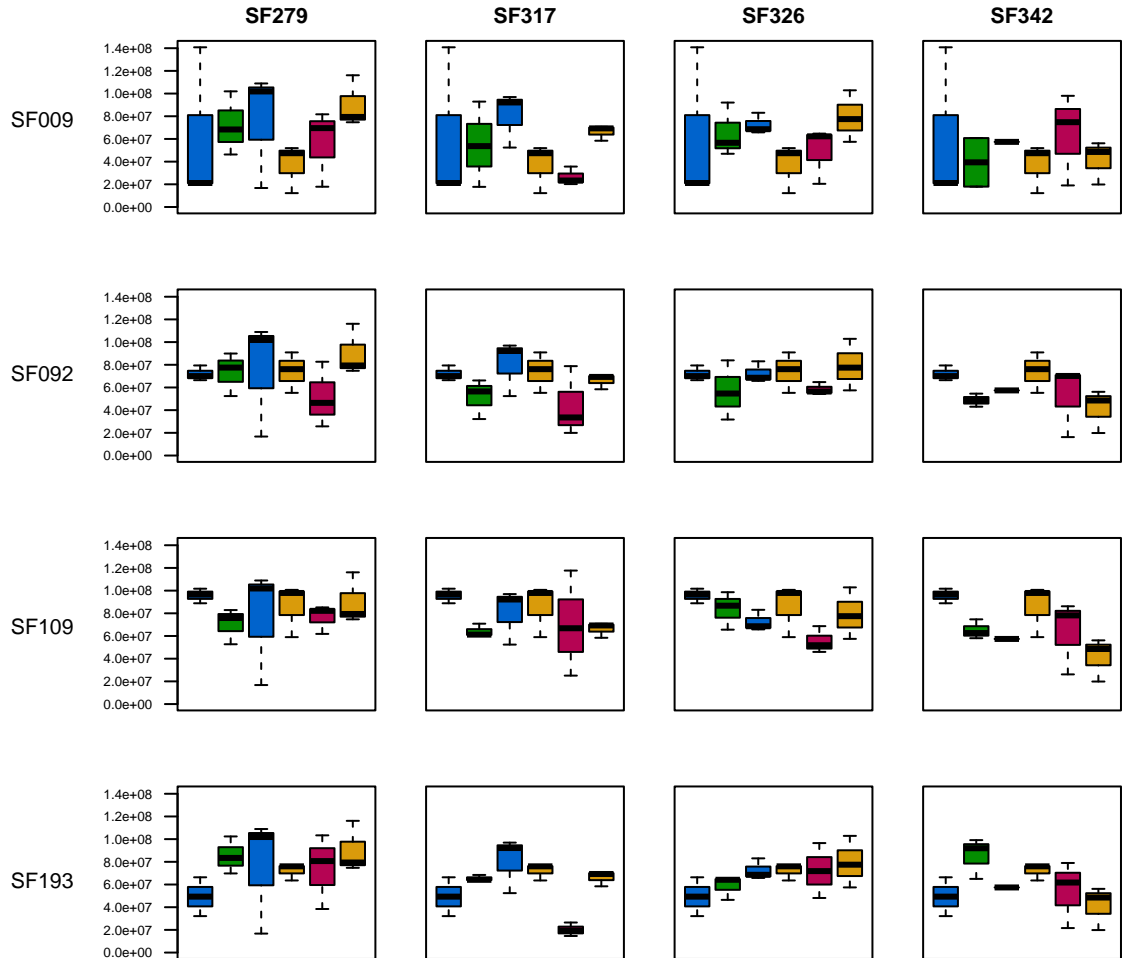



HanXRQChr03g0060911  
 Probable gamma-glutamyltranspeptidase 1  
 EC=3.4.19.13 EC=3.4.19.14

Parents WW  
 Parents WD  
 Hybrids WW  
 Hybrids WD

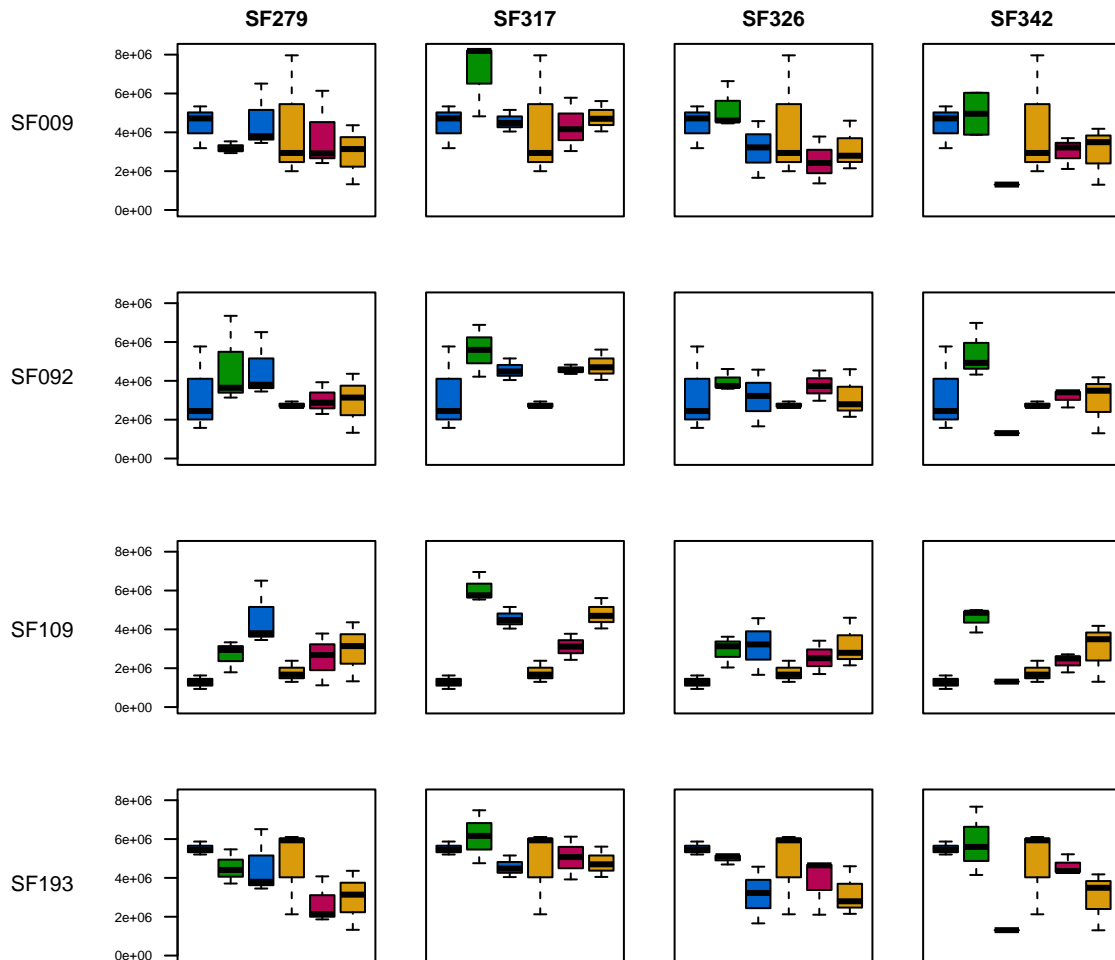

HanXRQChr09g0273161  
Probable purple acid phosphatase 27

- Parents WW
- Parents WD
- Hybrids WW
- Hybrids WD

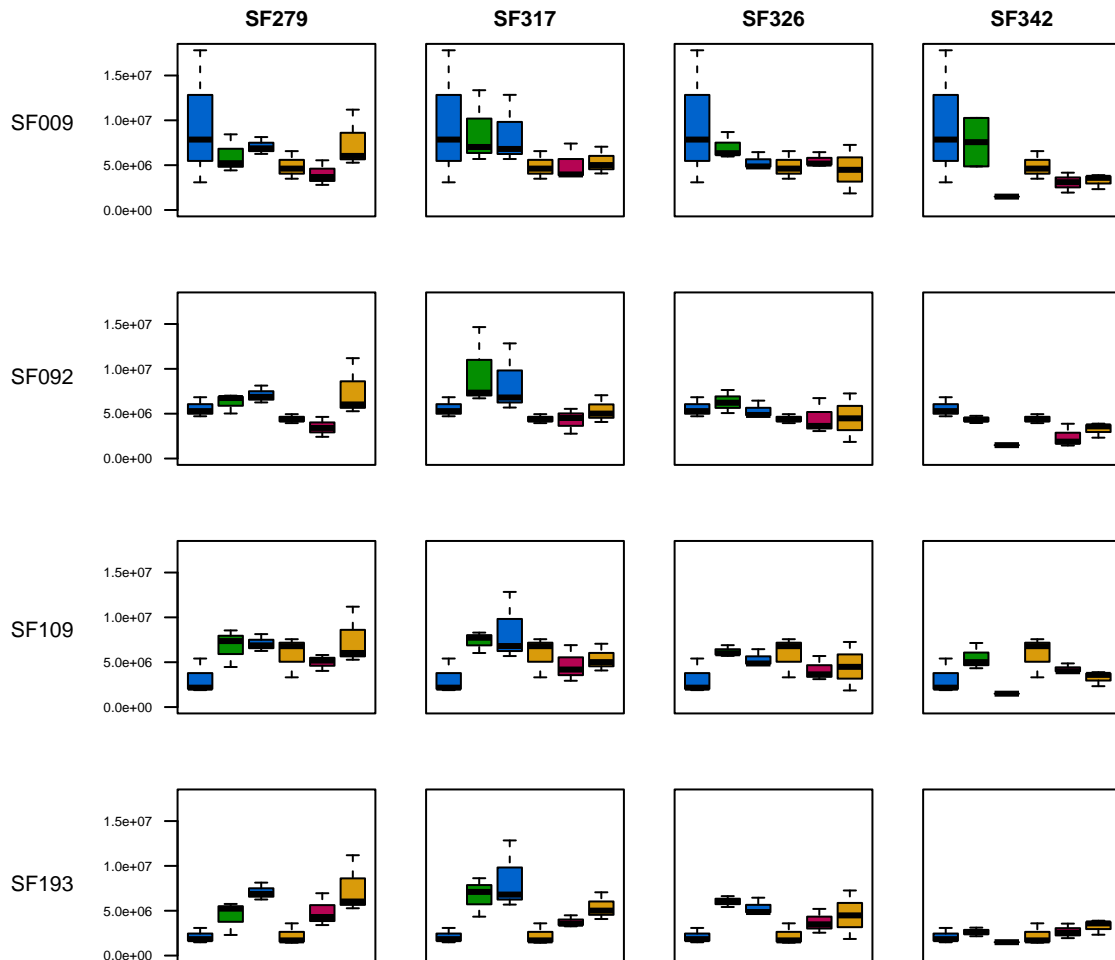

HanXRQChr15g0482901  
 Putative glutamine synthetase, type  
 III; Glutamine synthetase, N-terminal conserved

Parents WW  
 Parents WD  
 Hybrids WW  
 Hybrids WD

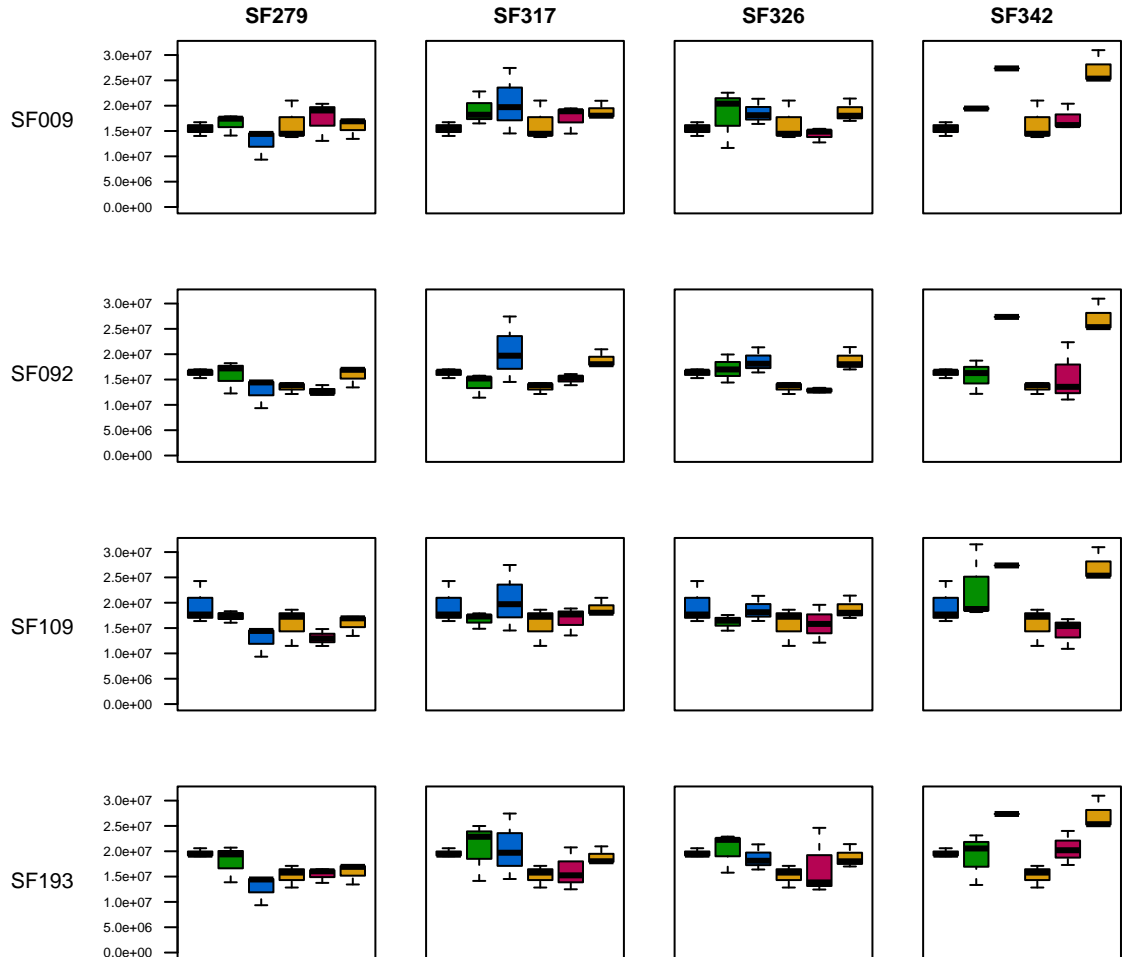

HanXRQChr10g0283331  
Probable villin 3

Parents WW  
Parents WD  
Hybrids WW  
Hybrids WD

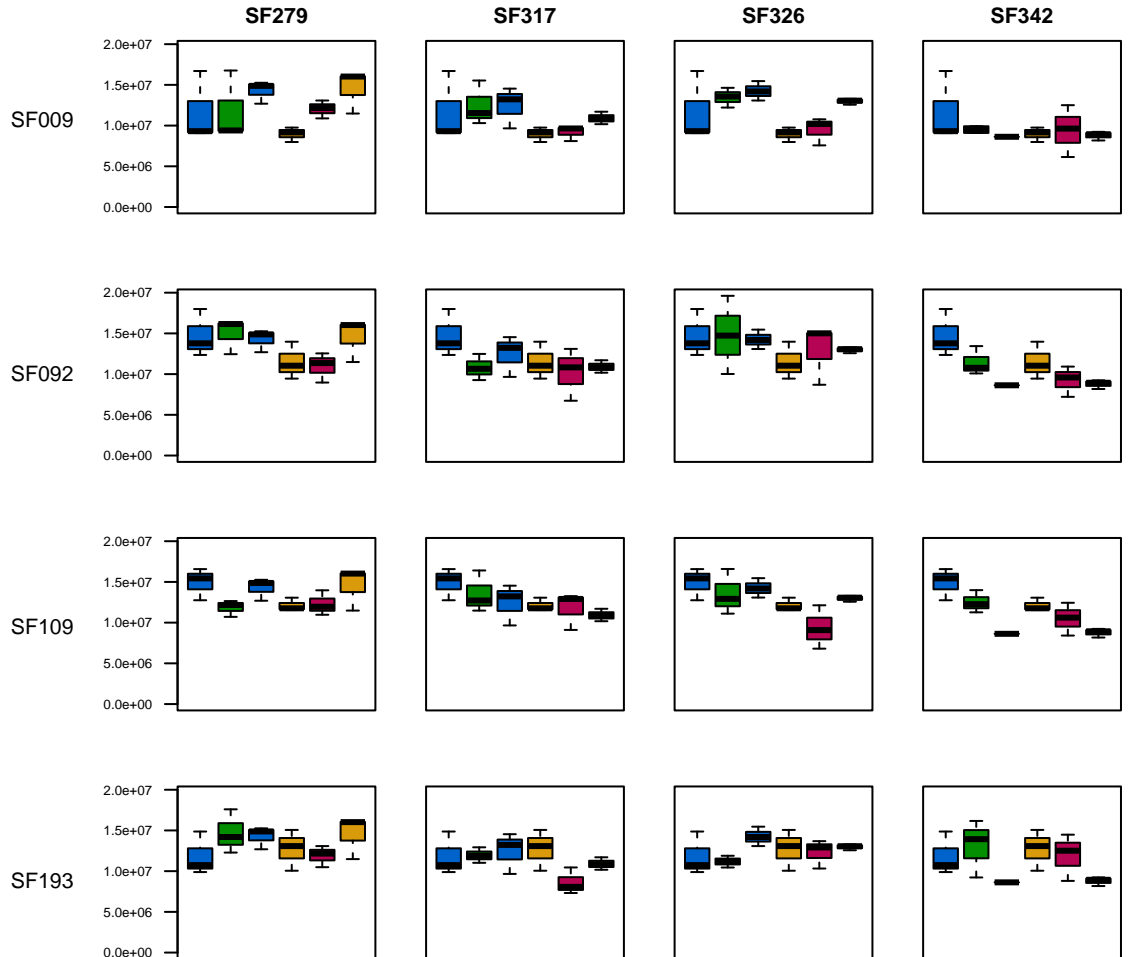

HanXRQChr11g0352961  
Probable eukaryotic aspartyl protease  
family protein

Parents WW  
Parents WD  
Hybrids WW  
Hybrids WD

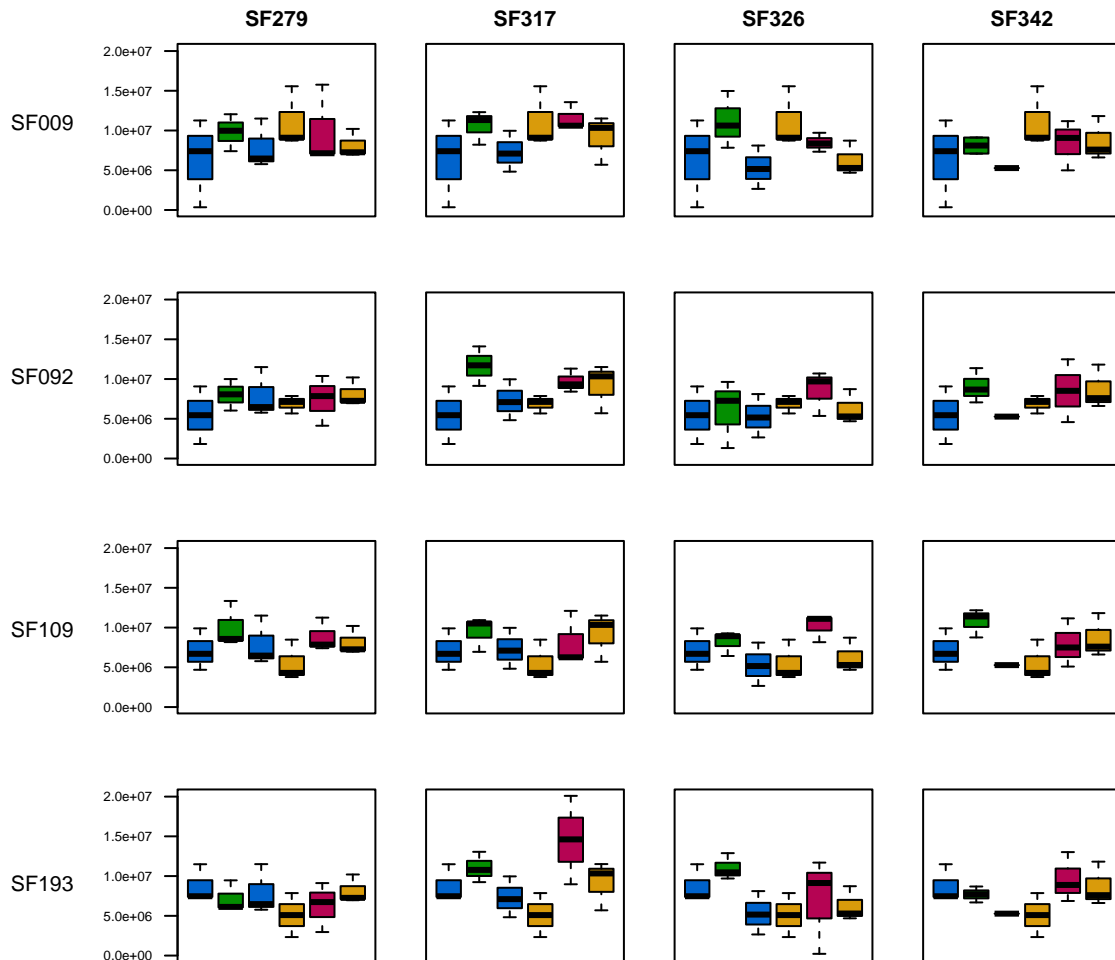

HanXRQChr04g0119231  
Probable cysteine proteinase inhibitor  
12

Parents WW  
Parents WD  
Hybrids WW  
Hybrids WD

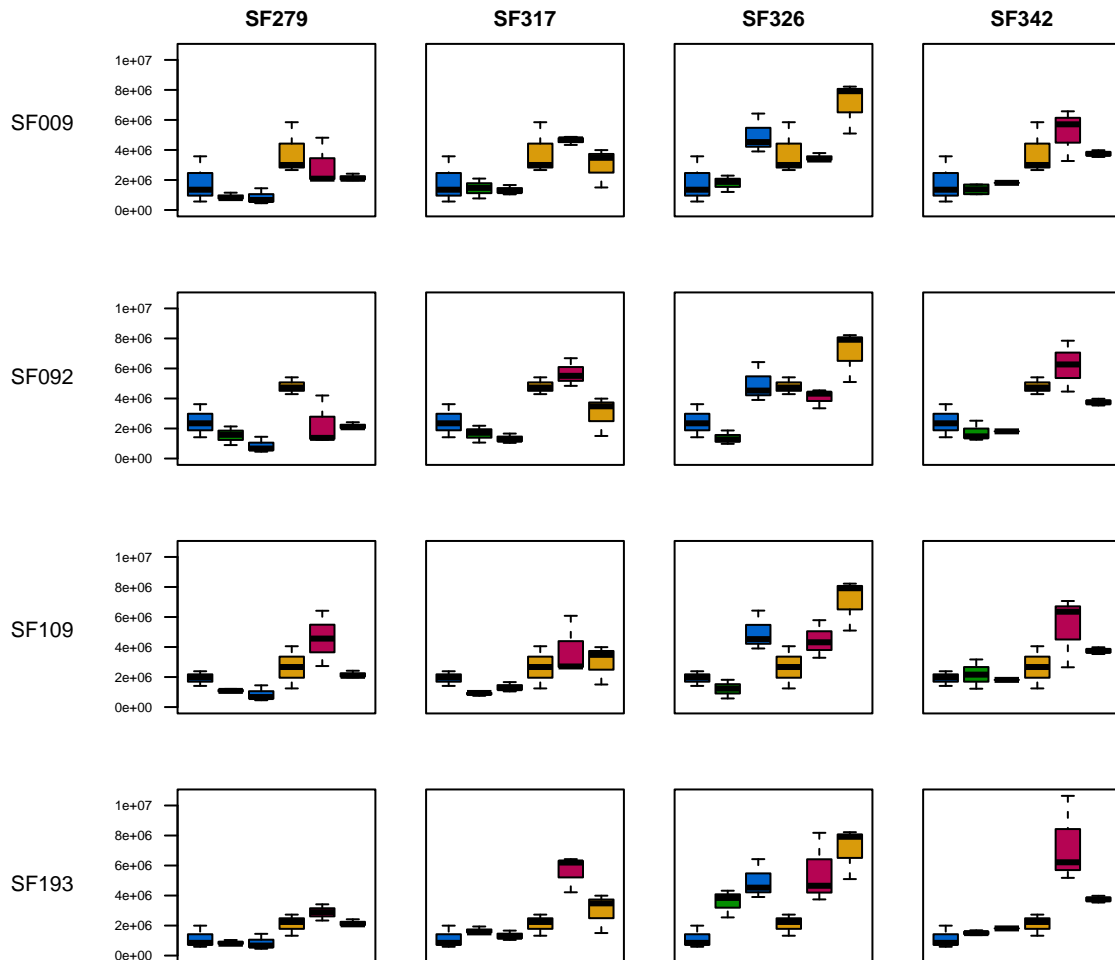

HanXRQChr04g0109151  
Putative cyclophilin-type  
peptidyl-prolyl cis-trans isomerase domain

Parents WW  
Parents WD  
Hybrids WW  
Hybrids WD

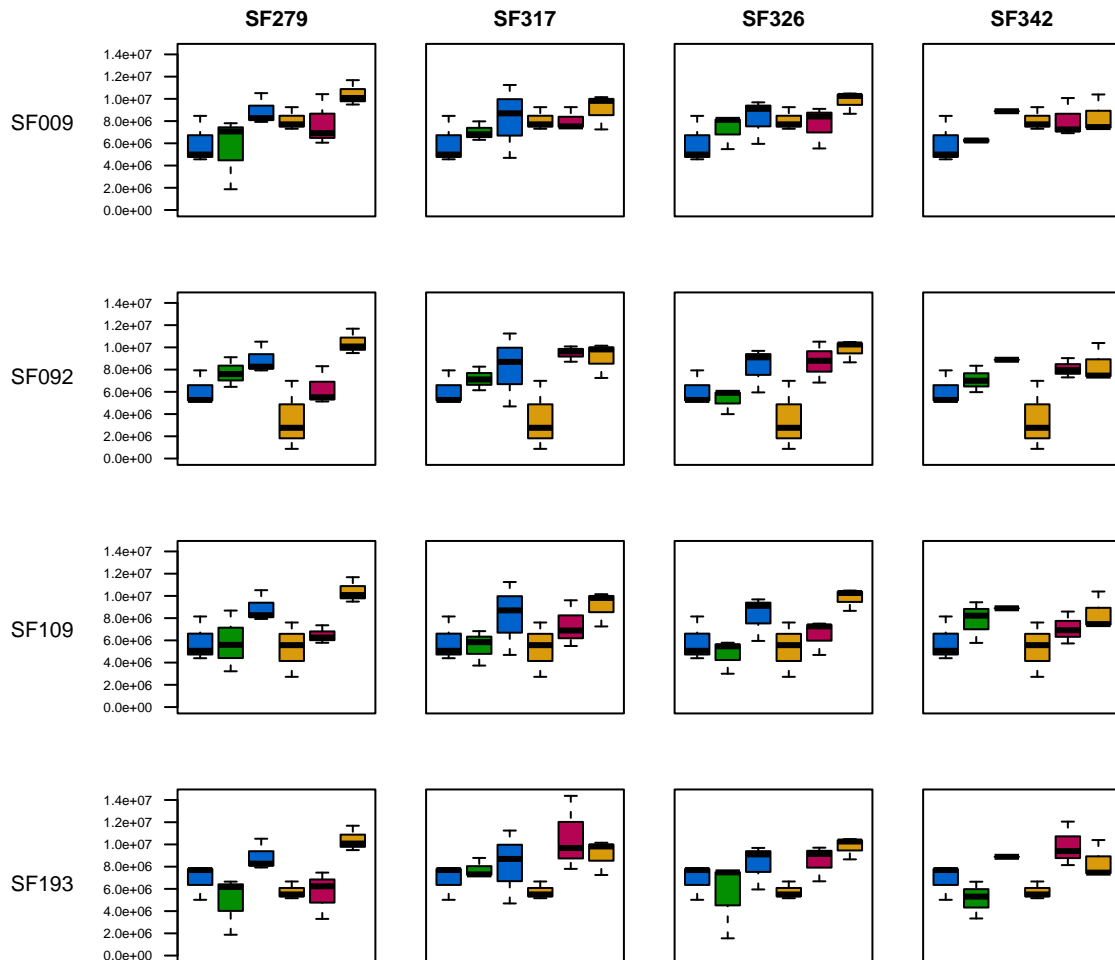

HanXRQChr03g0061321  
Probable ribosomal protein S10p/S20e  
family protein

Parents WW  
Parents WD  
Hybrids WW  
Hybrids WD

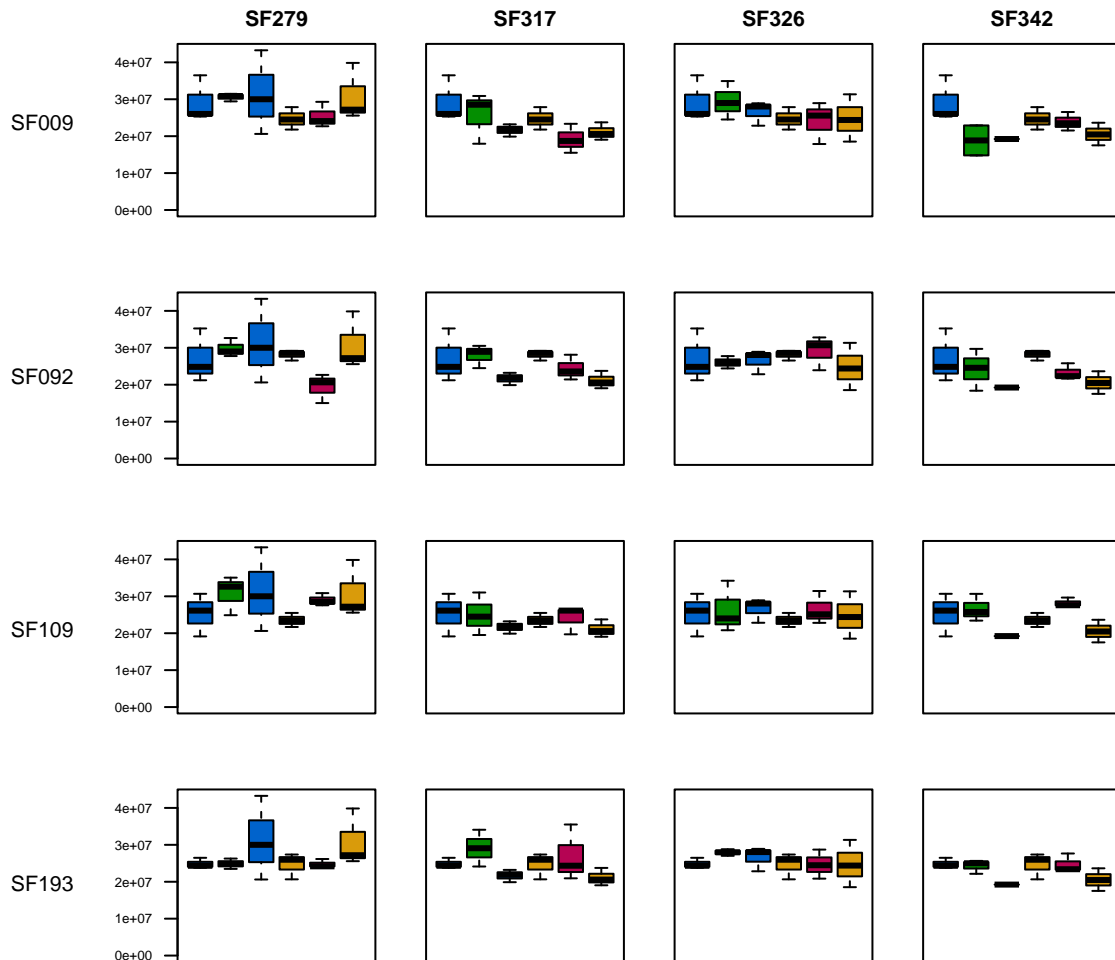



HanXRQChr09g0247441  
Probable photosystem II reaction center  
PsbP family protein

Parents WW  
Parents WD  
Hybrids WW  
Hybrids WD

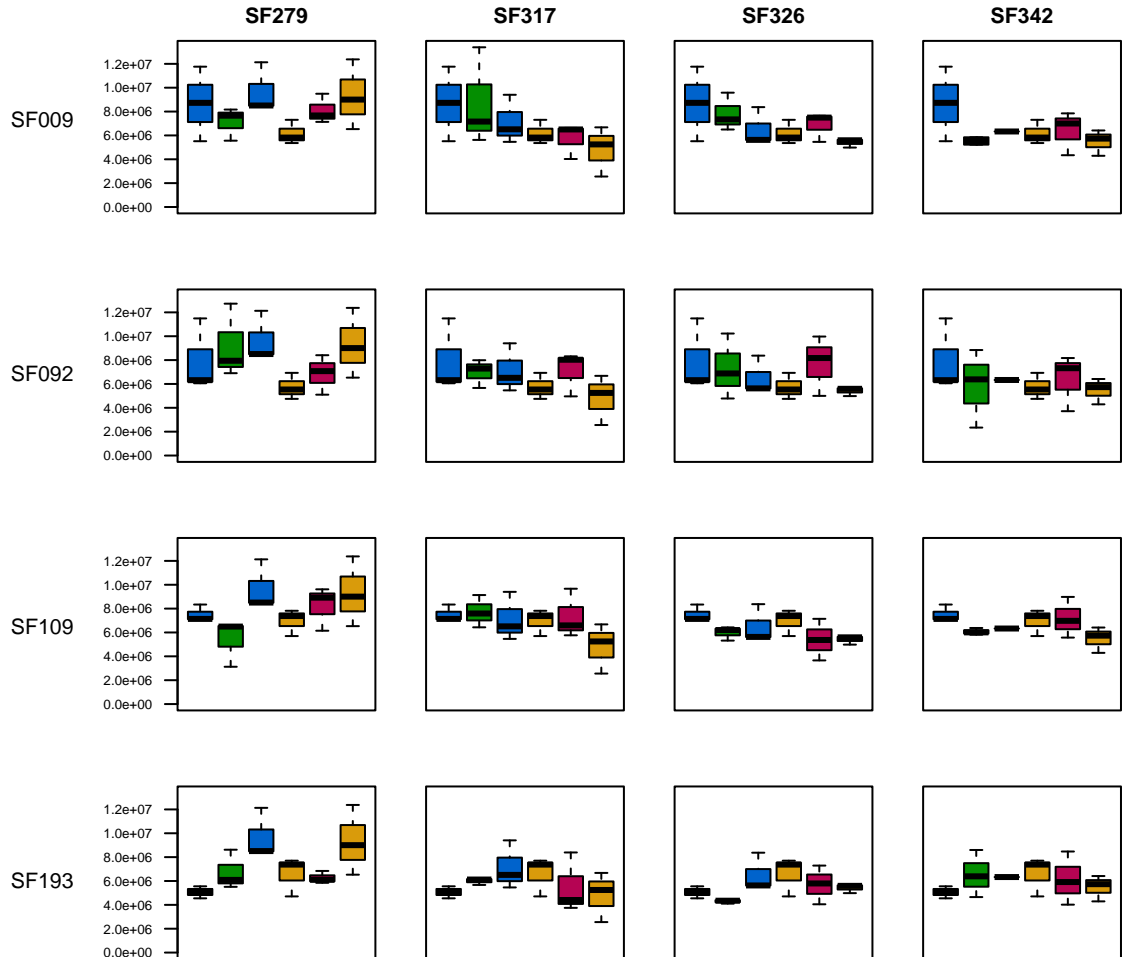

HanXRQChr05g0152041  
Probable ornithine  
carbamoyltransferase, chloroplastic

Parents WW  
Parents WD  
Hybrids WW  
Hybrids WD

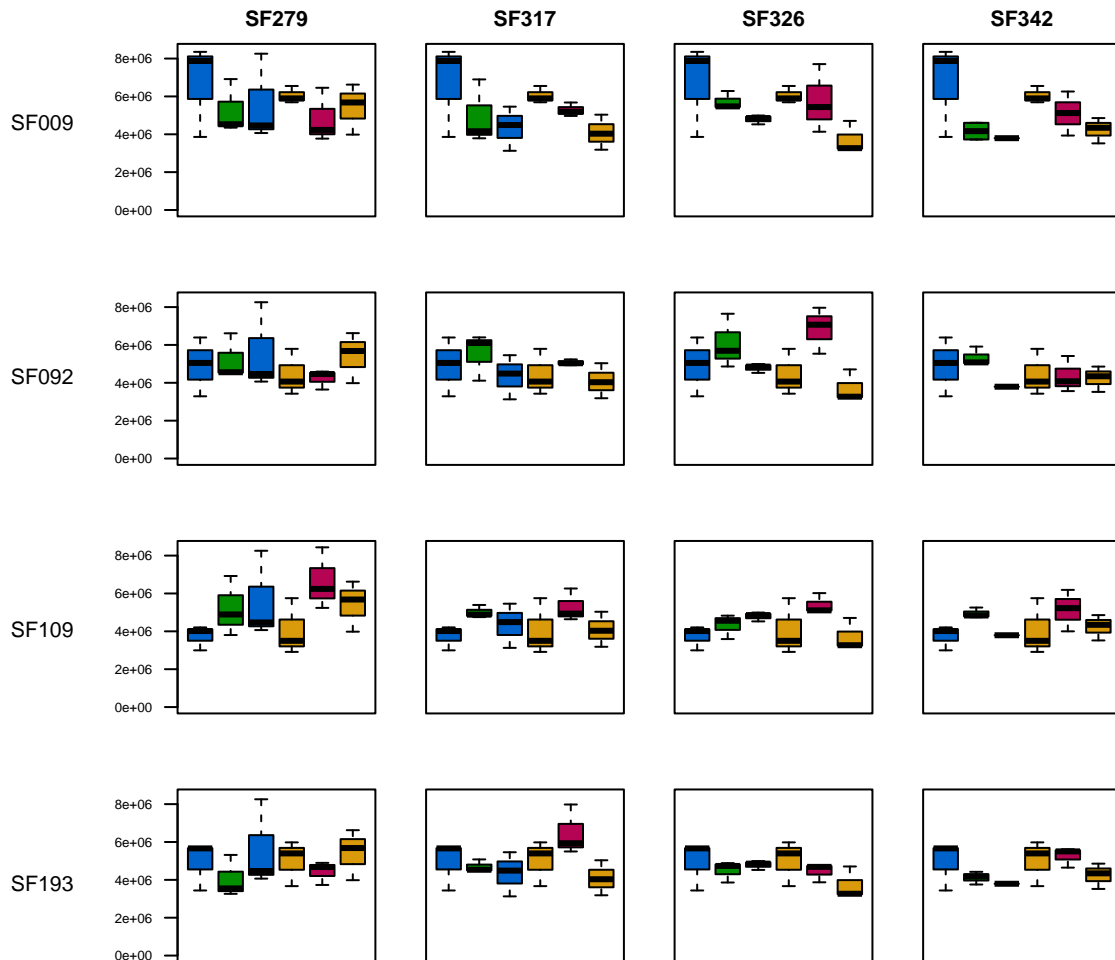

HanXRQChr03g0086871  
Probable puromycin-sensitive  
aminopeptidase

Parents WW  
Parents WD  
Hybrids WW  
Hybrids WD

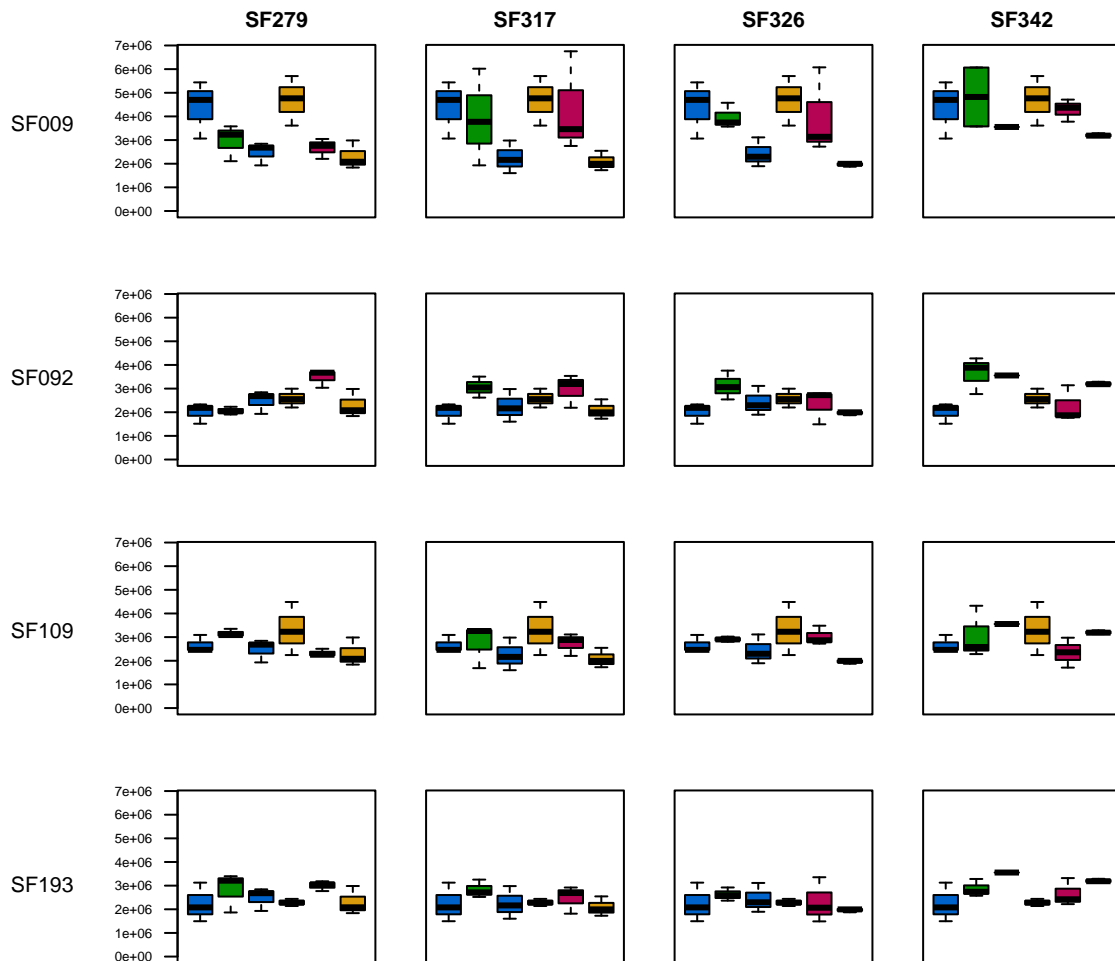

HanXRQChr10g0312421  
Probable glyoxylate reductase 2

Parents WW  
Parents WD  
Hybrids WW  
Hybrids WD

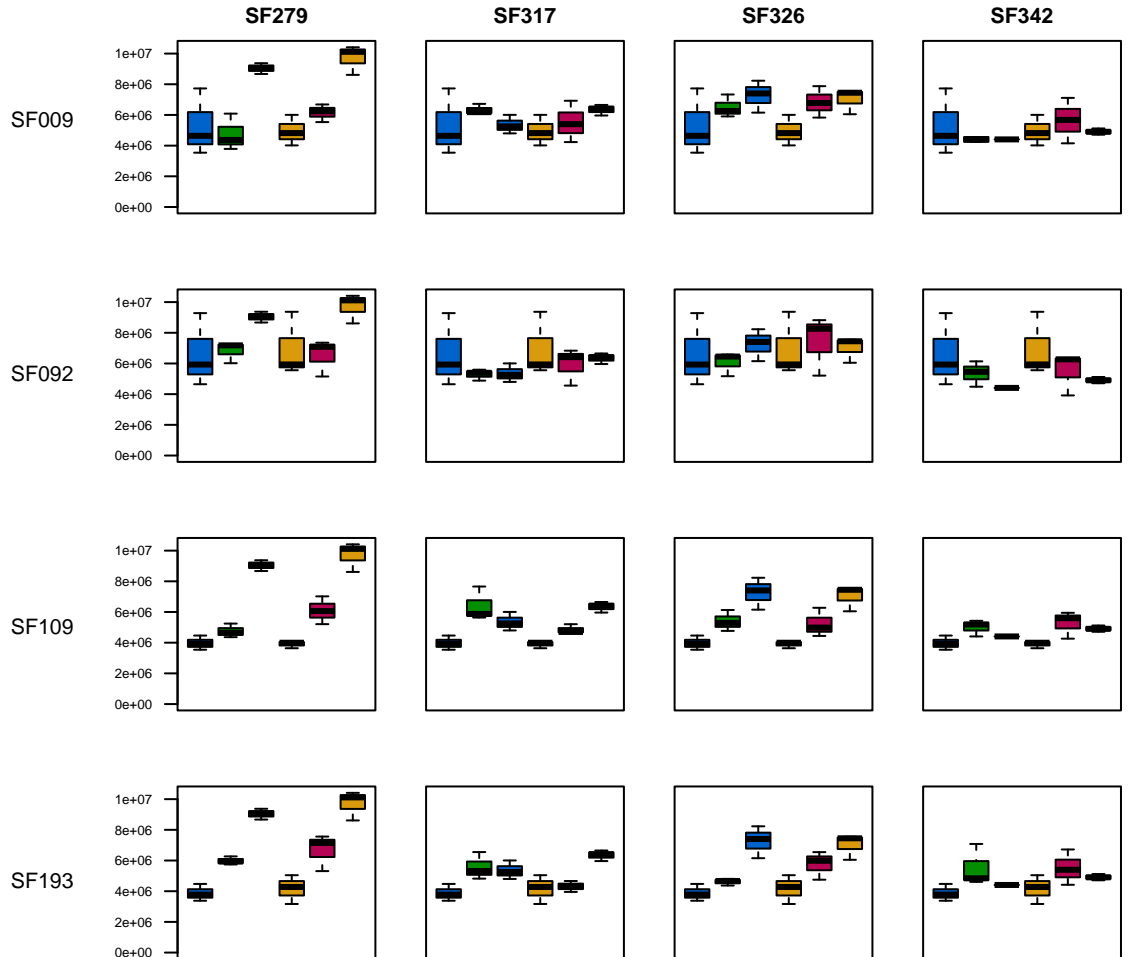

HanXRQChr09g0259251  
Putative nitrite reductase [NAD(P)H]  
large subunit, NirB

Parents WW  
Parents WD  
Hybrids WW  
Hybrids WD

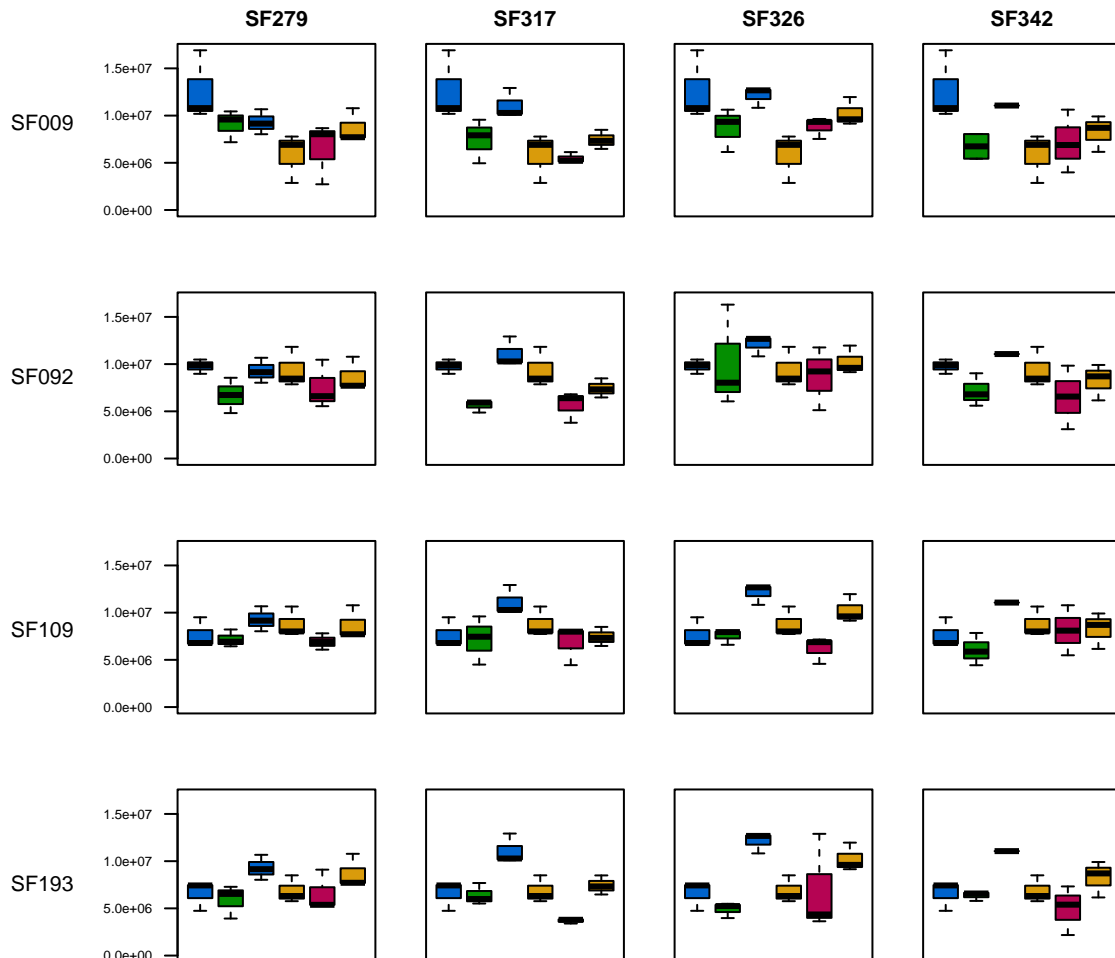

HanXRQChr10g0293531  
Putative zinc finger, CCHC-type;  
DEAD/DEAH box helicase domain; GUCT;

Parents WW  
Parents WD  
Hybrids WW  
Hybrids WD

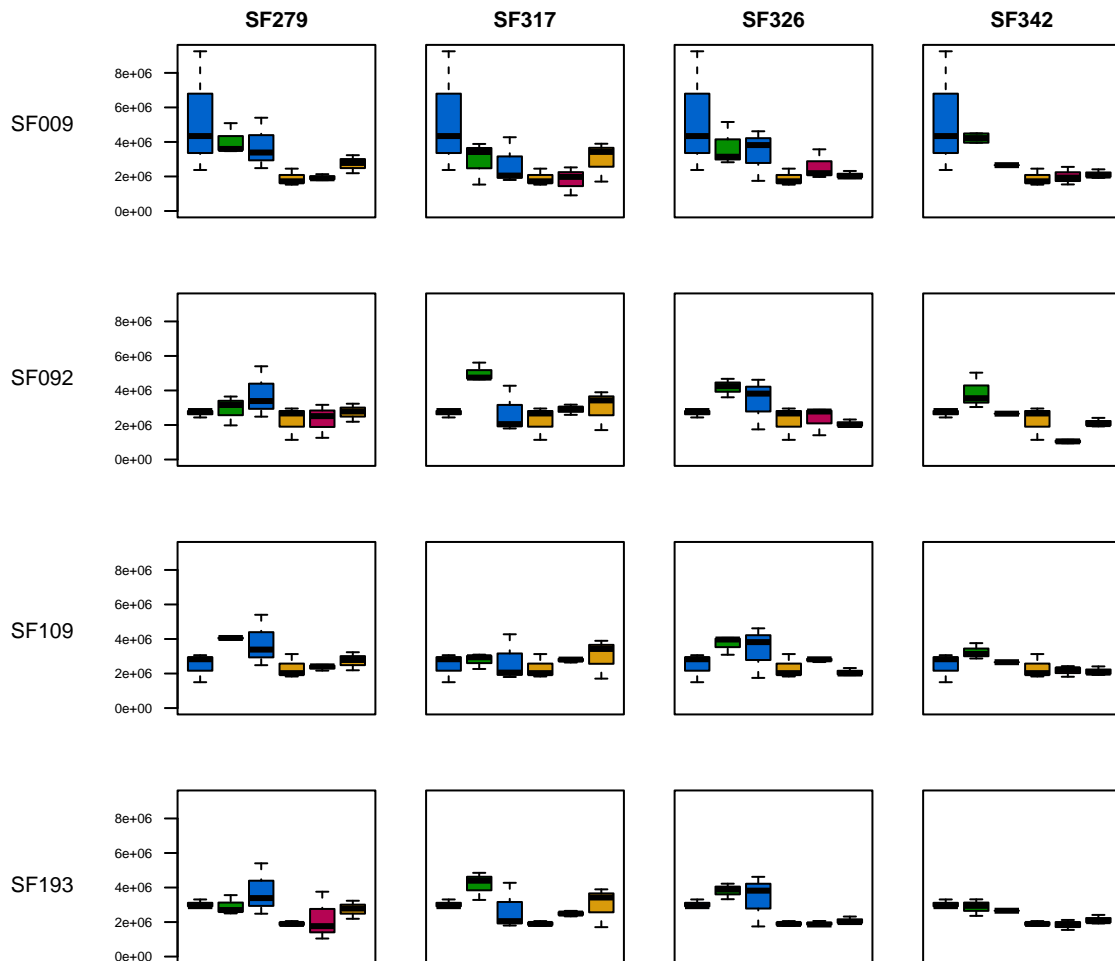

HanXRQChr03g0065191  
Probable ATP phosphoribosyltransferase,  
chloroplastic

Parents WW  
Parents WD  
Hybrids WW  
Hybrids WD

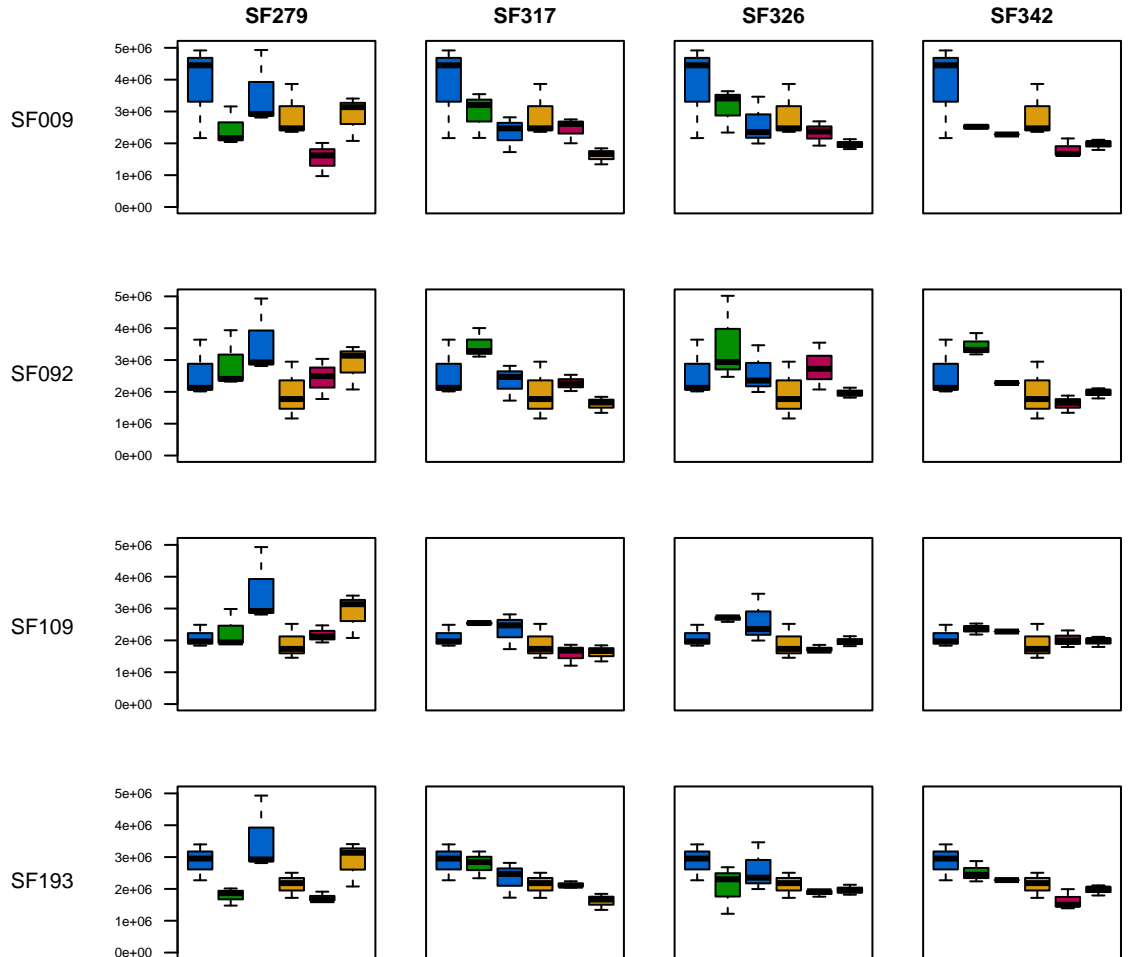

HanXRQCPg0580061  
Putative photosystem II cytochrome  
b559, alpha subunit

Parents WW  
Parents WD  
Hybrids WW  
Hybrids WD

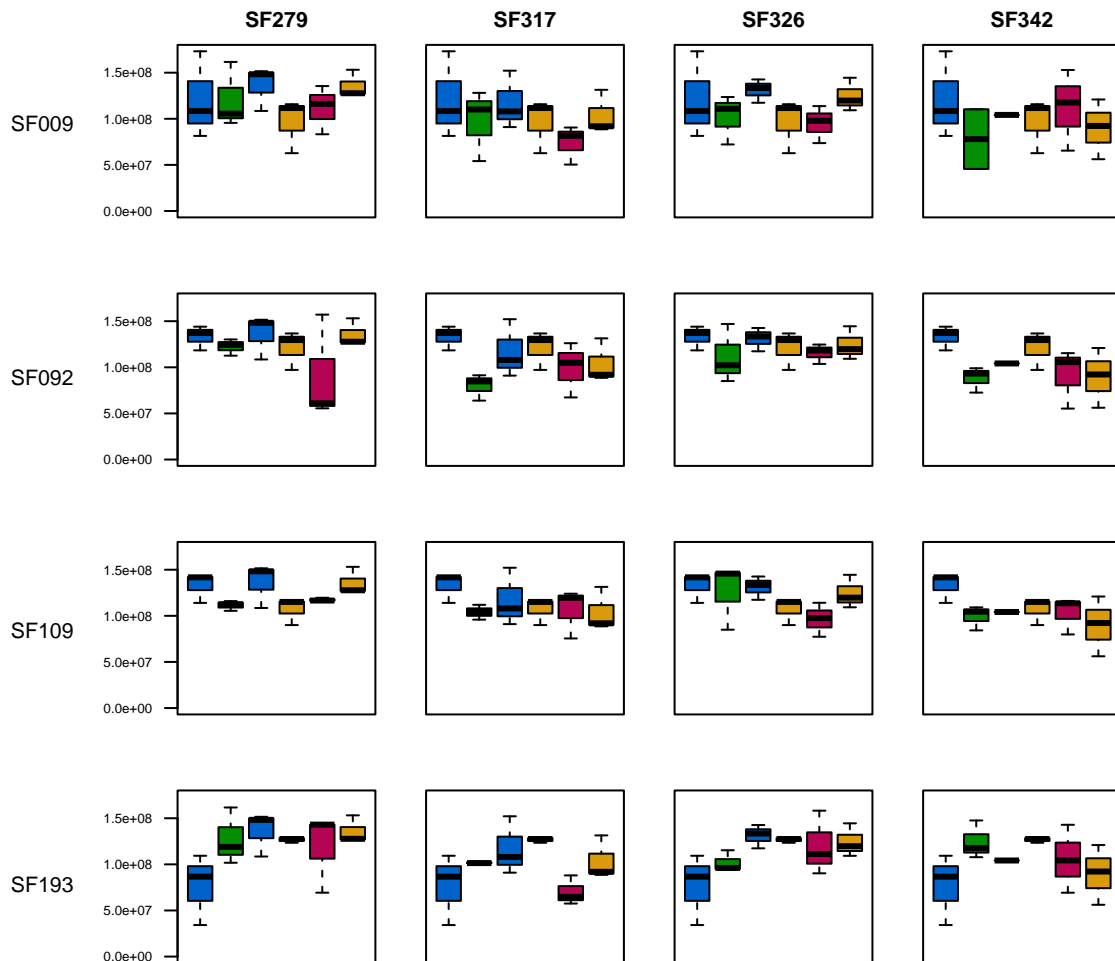



HanXRQCPg0580231  
Putative ribosomal protein L2

- Parents WW
- Parents WD
- Hybrids WW
- Hybrids WD

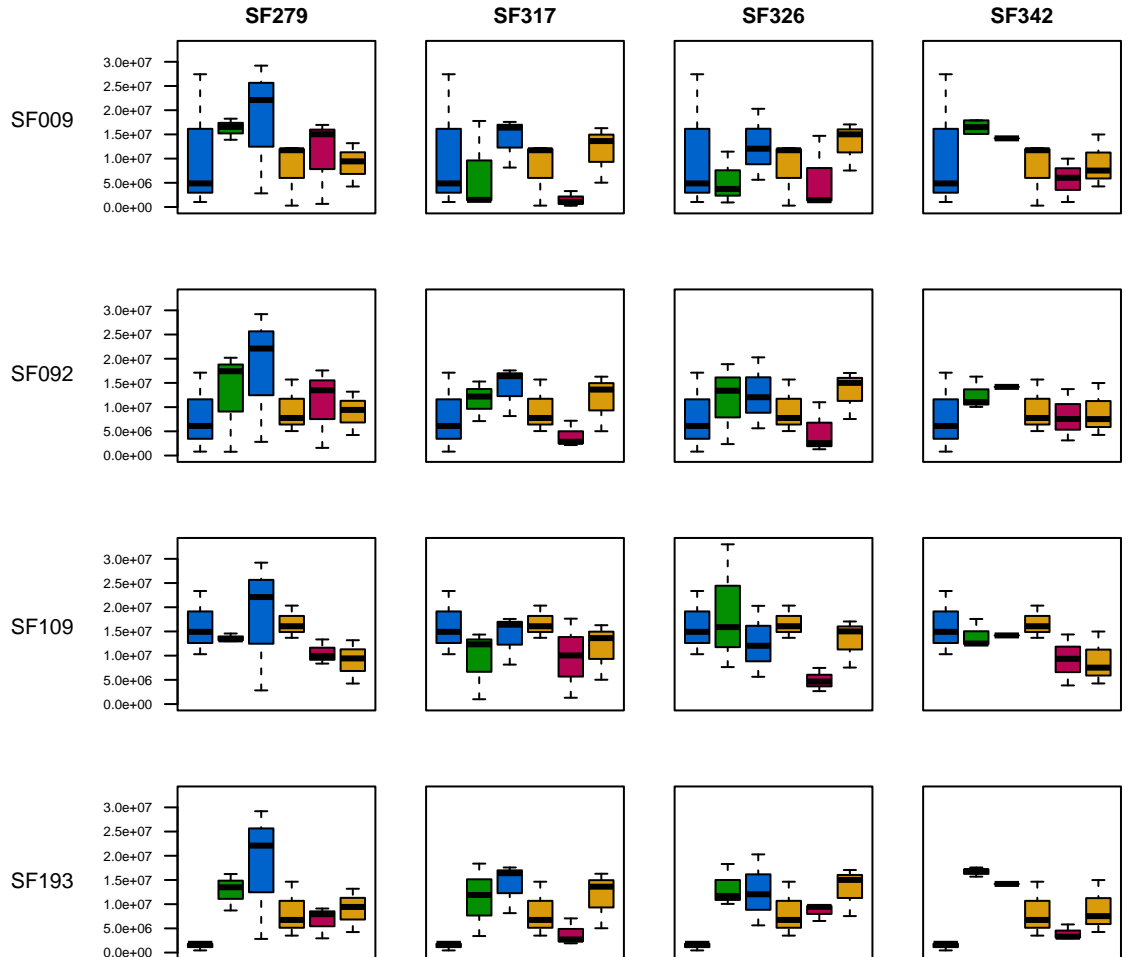

HanXRQChr17g0538791  
Probable UDP-arabinopyranose mutase 3

Parents WW  
Parents WD  
Hybrids WW  
Hybrids WD

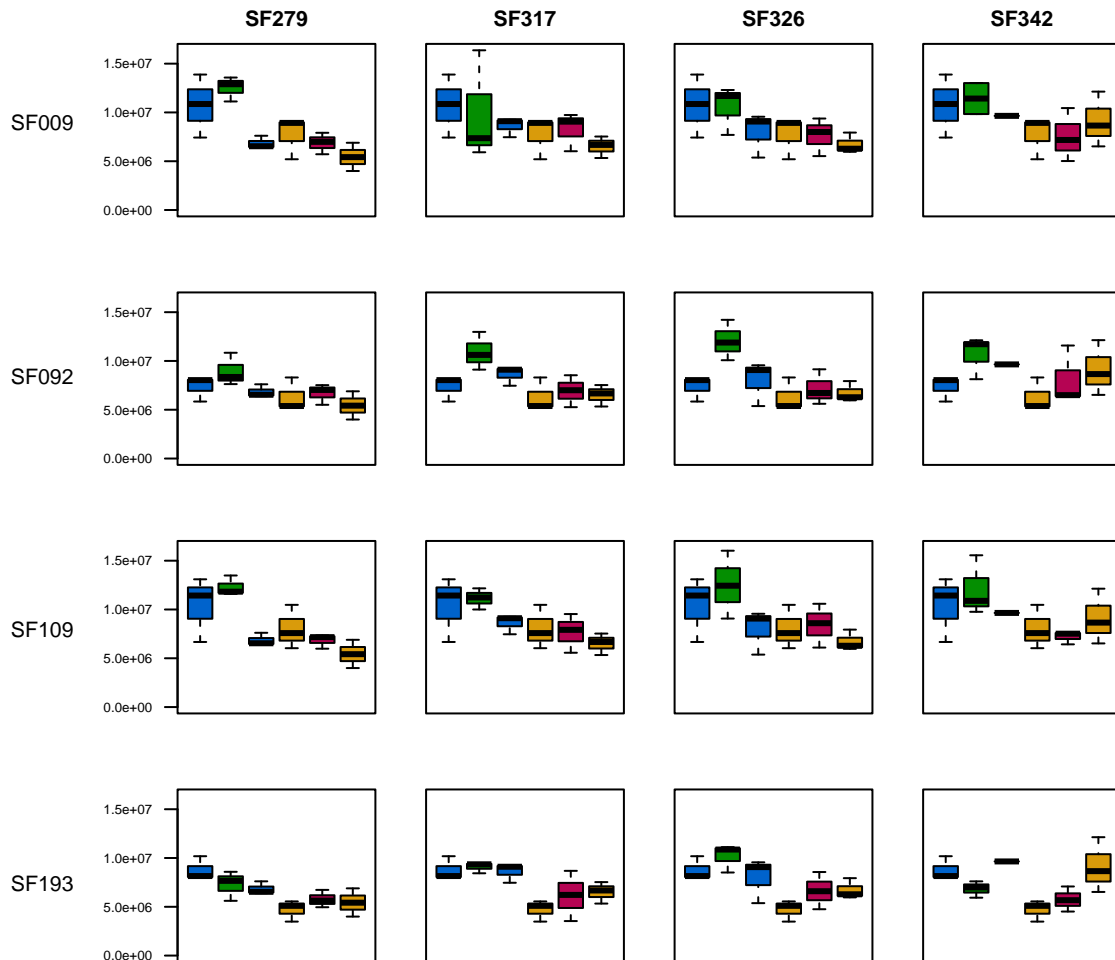

HanXRQChr14g0451571  
Putative monothiol  
glutaredoxin-related; Thioredoxin-like fold

Parents WW  
Parents WD  
Hybrids WW  
Hybrids WD

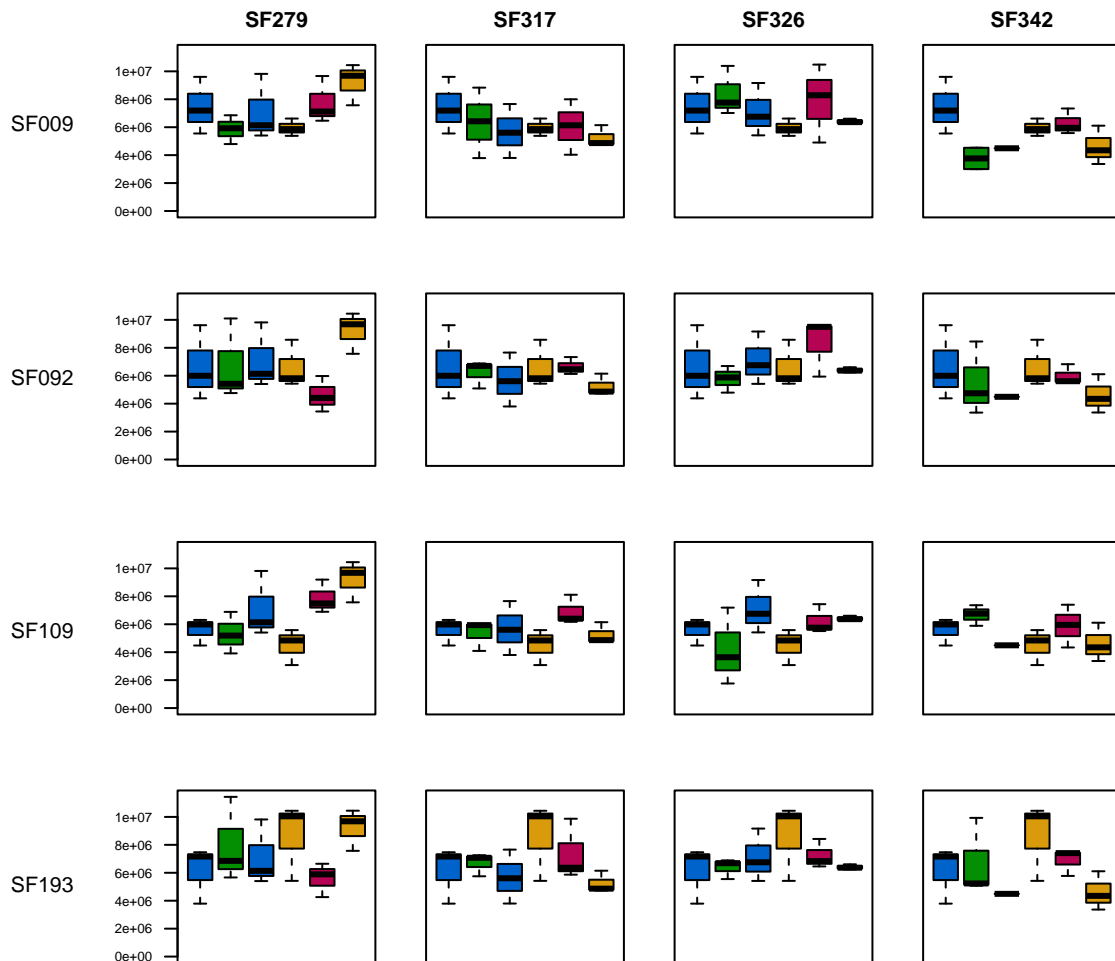

HanXRQChr17g0541141  
Probable FUNCTIONS IN:  
molecular\_function unknown

Parents WW  
Parents WD  
Hybrids WW  
Hybrids WD

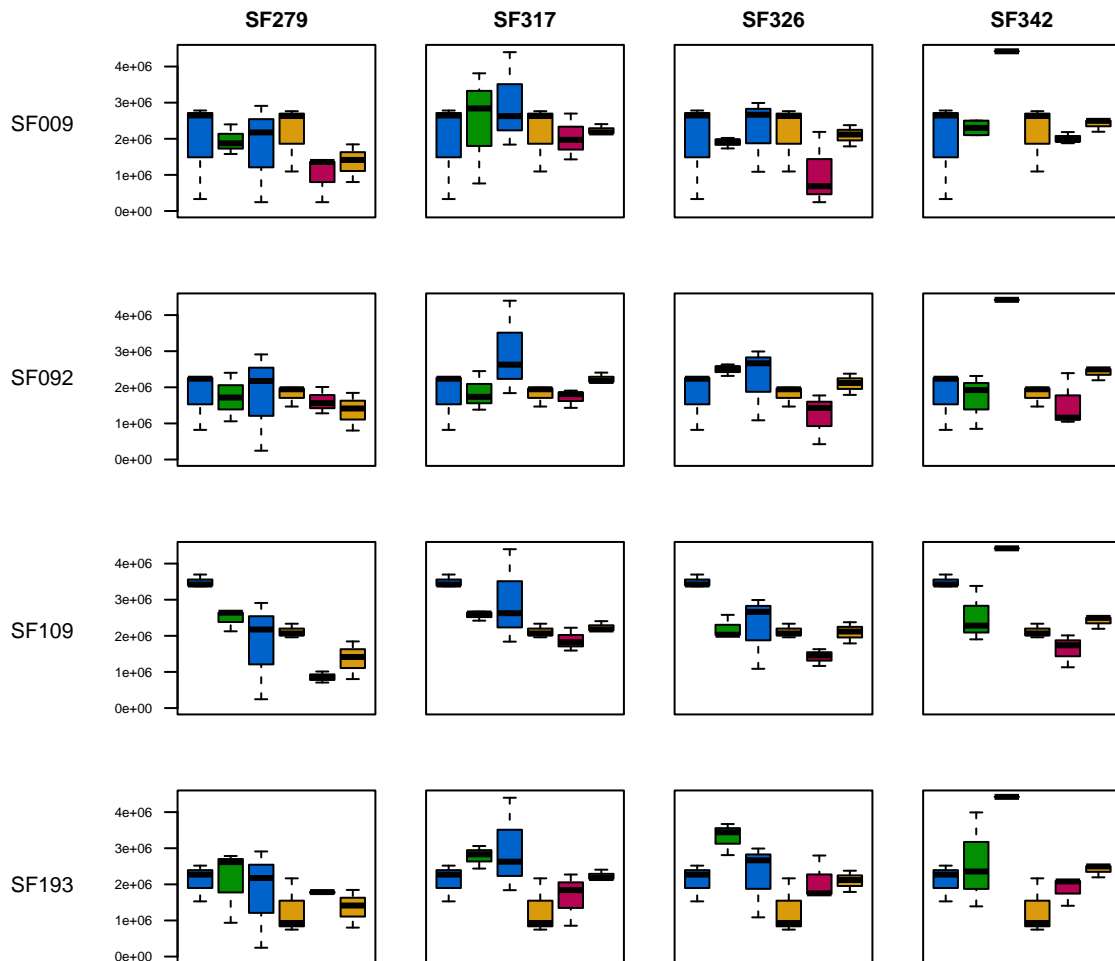

HanXRQChr17g0556391  
Probable triosephosphate isomerase,  
chloroplastic

Parents WW  
Parents WD  
Hybrids WW  
Hybrids WD

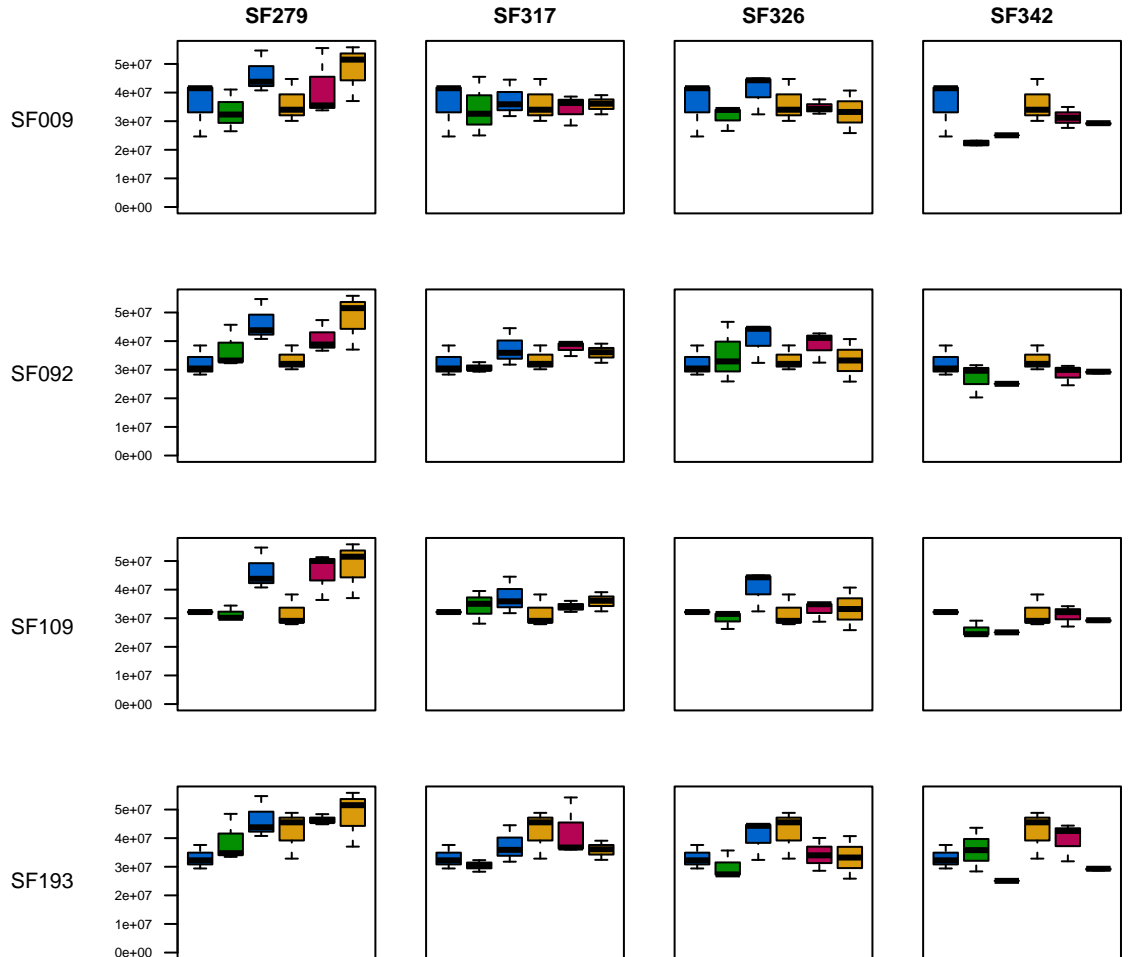

- Parents WW
- Parents WD
- Hybrids WW
- Hybrids WD

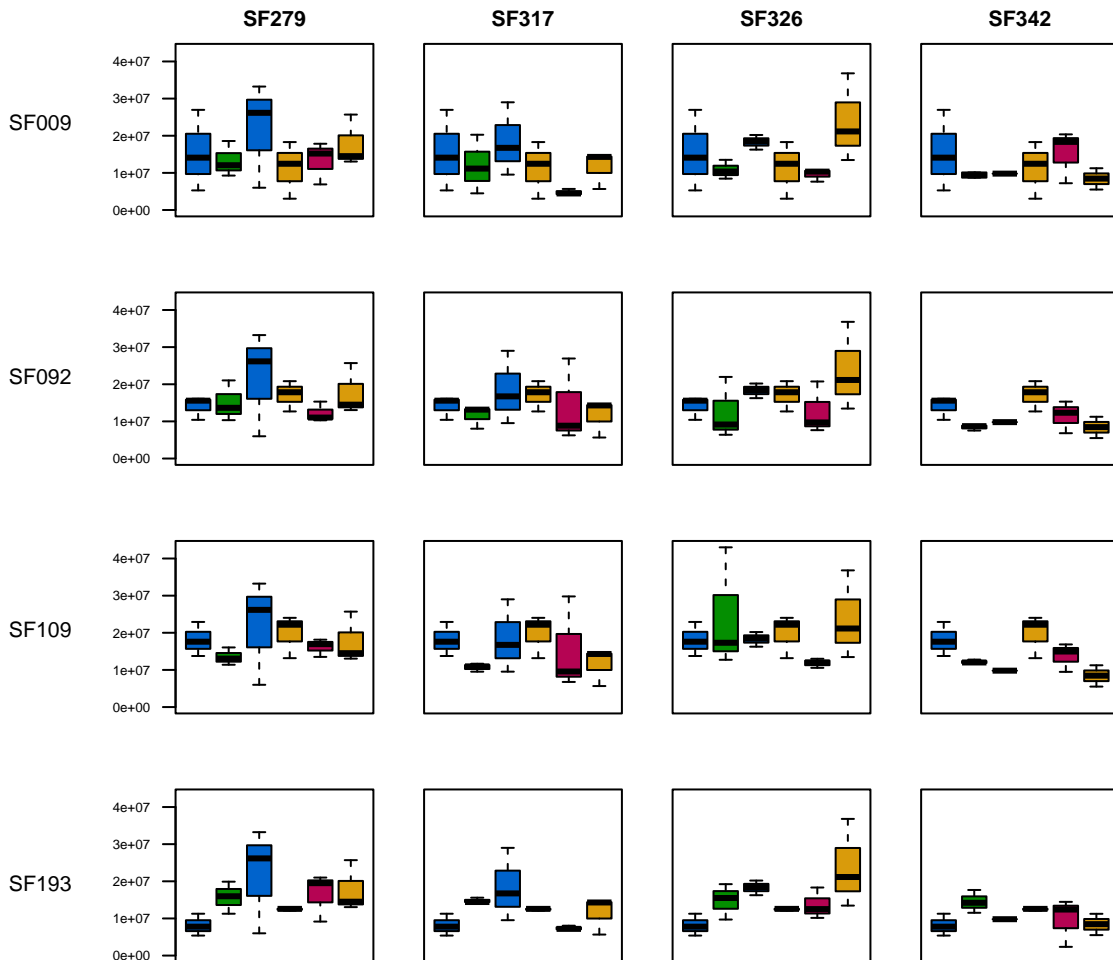

HanXRQChr03g0083261  
Probable NAD(P)-binding Rossmann-fold  
superfamily protein

Parents WW  
Parents WD  
Hybrids WW  
Hybrids WD

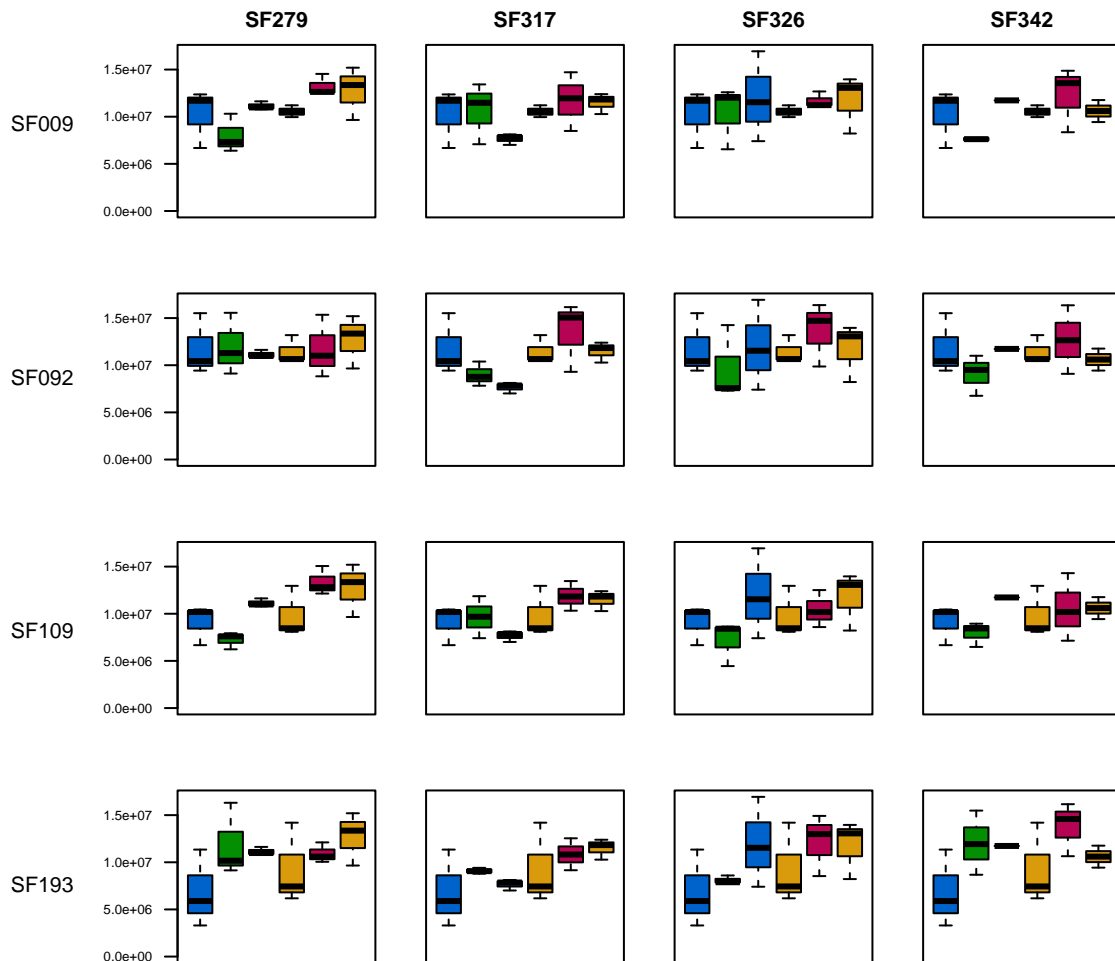

HanXRQChr13g0416311  
Probable peptidase M1 family protein

Parents WW  
Parents WD  
Hybrids WW  
Hybrids WD

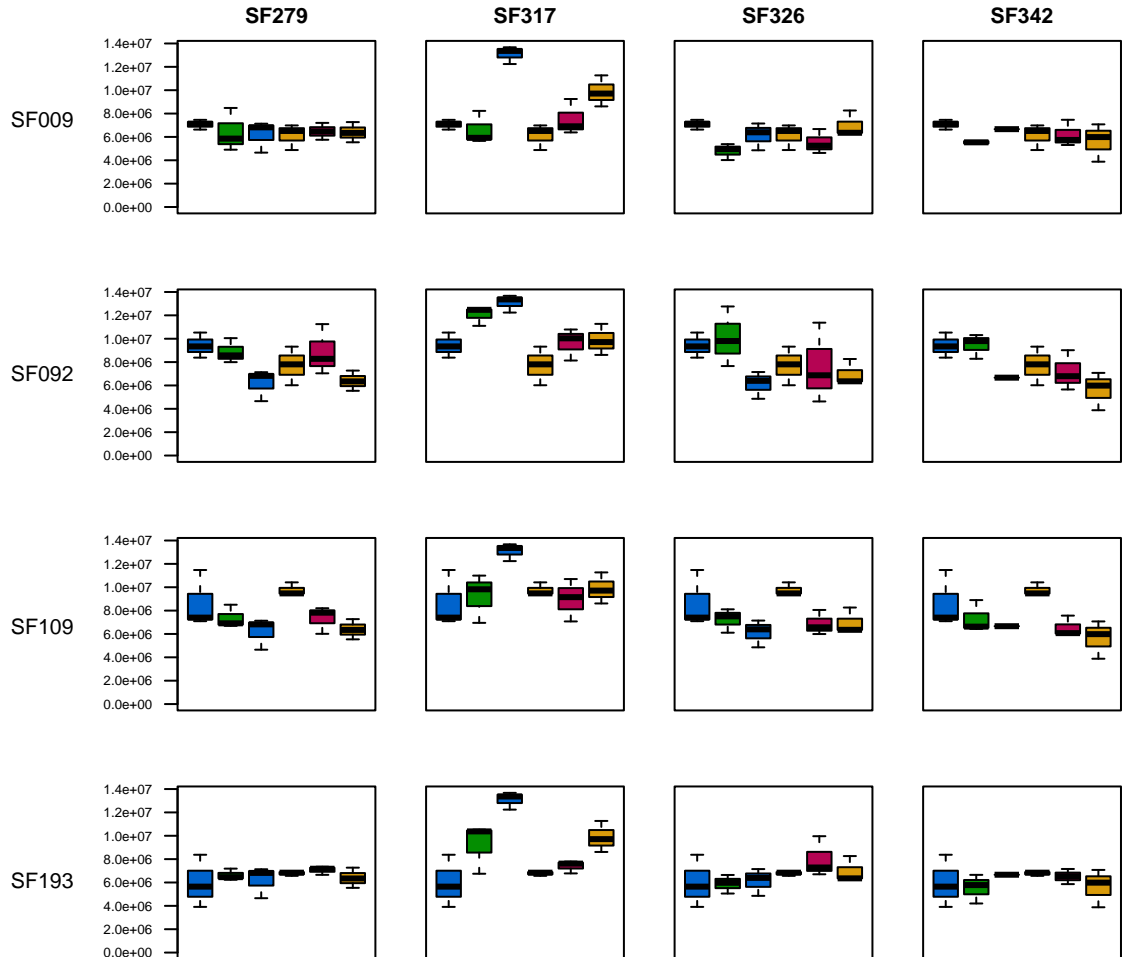



HanXRQChr06g0171121  
Probable protein THYLAKOID FORMATION  
chloroplastic

Parents WW  
Parents WD  
Hybrids WW  
Hybrids WD

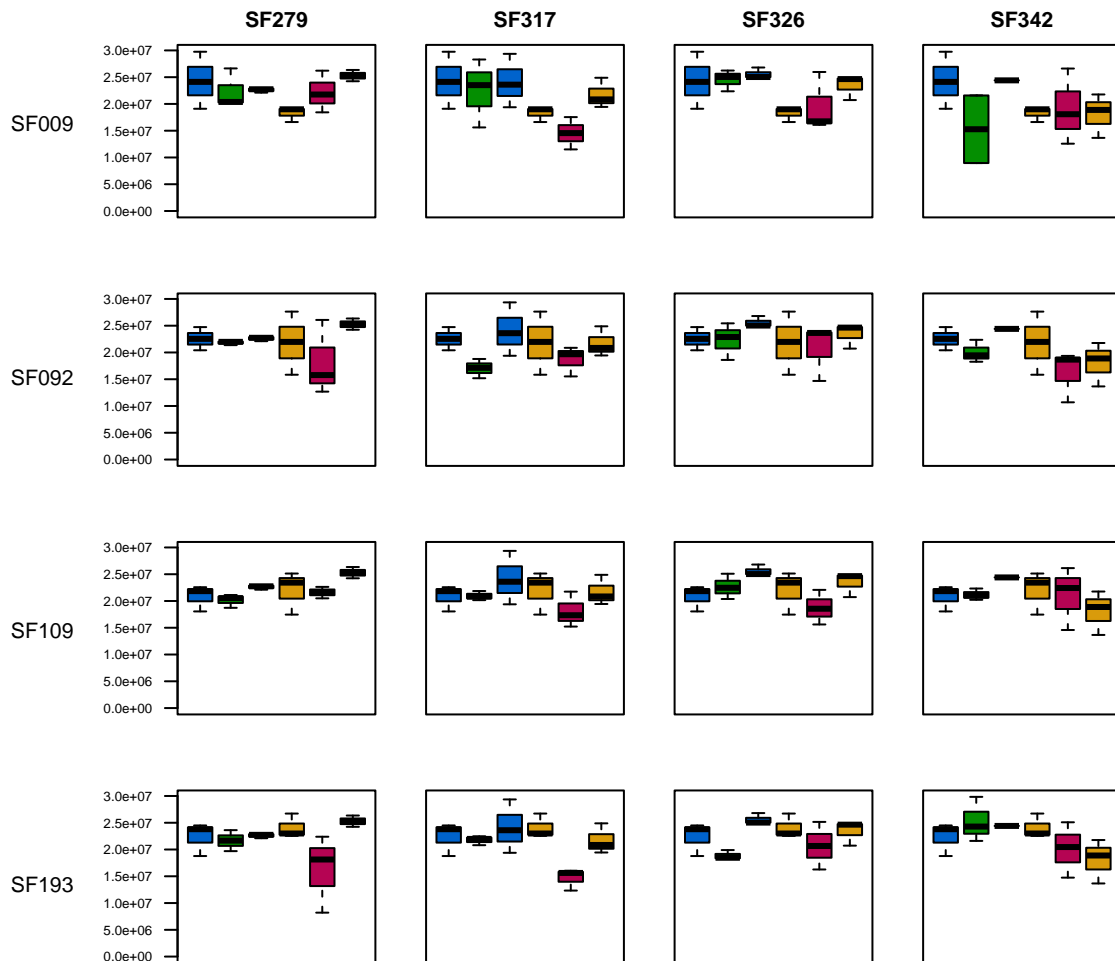

HanXRQChr07g0202701  
Probable sedoheptulose-bisphosphatase

Parents WW  
Parents WD  
Hybrids WW  
Hybrids WD

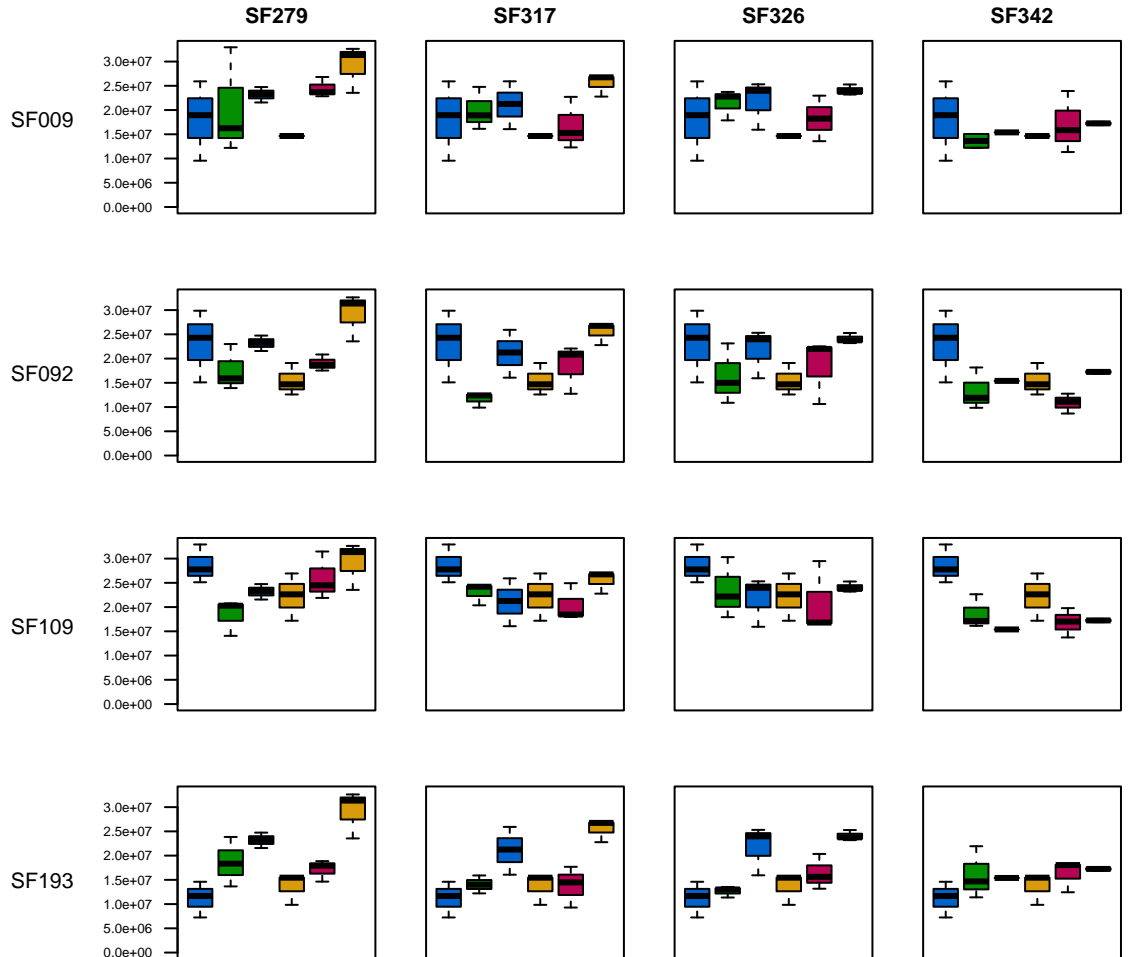

HanXRQChr08g0232881  
Probable photosystem I subunit G

Parents WW  
Parents WD  
Hybrids WW  
Hybrids WD

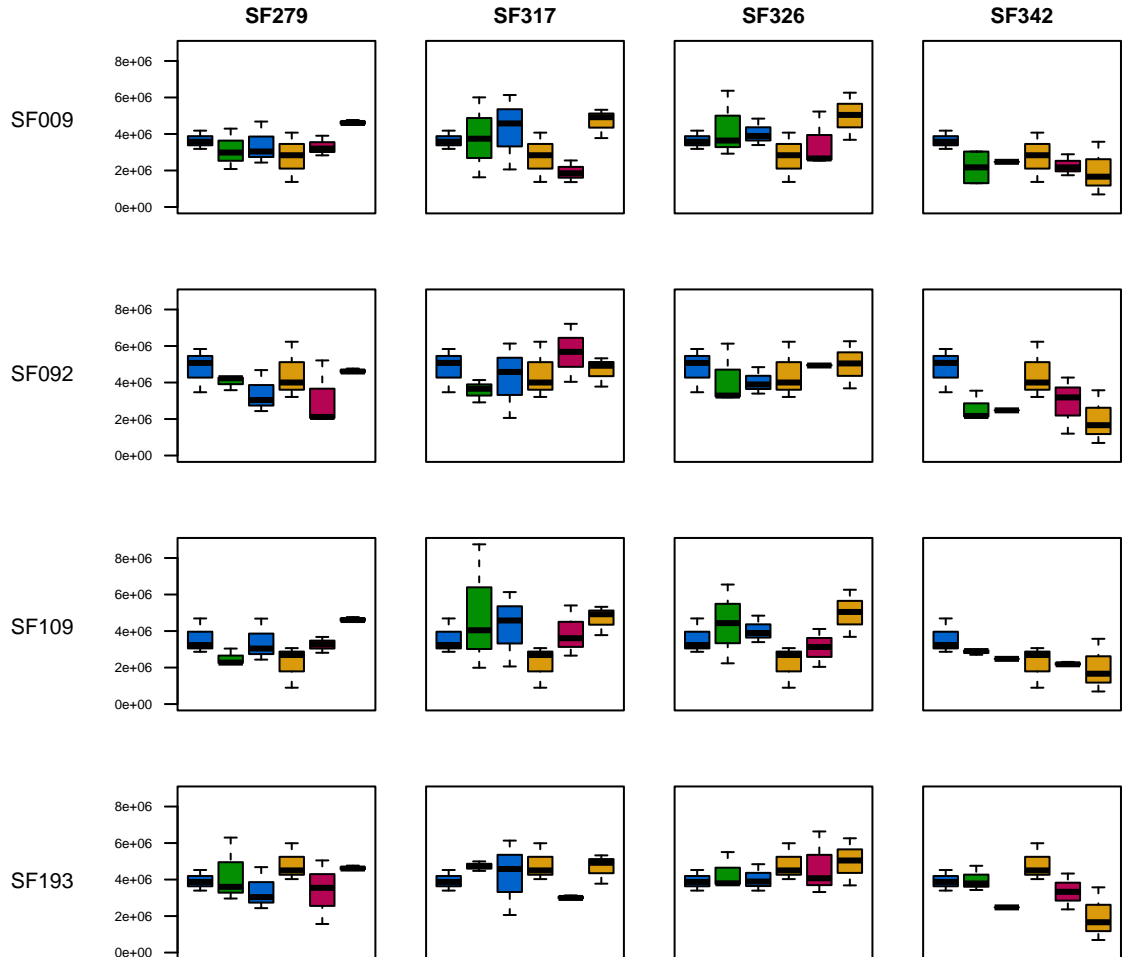

HanXRQChr03g0092631  
Putative bifunctional polymyxin  
resistance protein, ArnA

Parents WW  
Parents WD  
Hybrids WW  
Hybrids WD

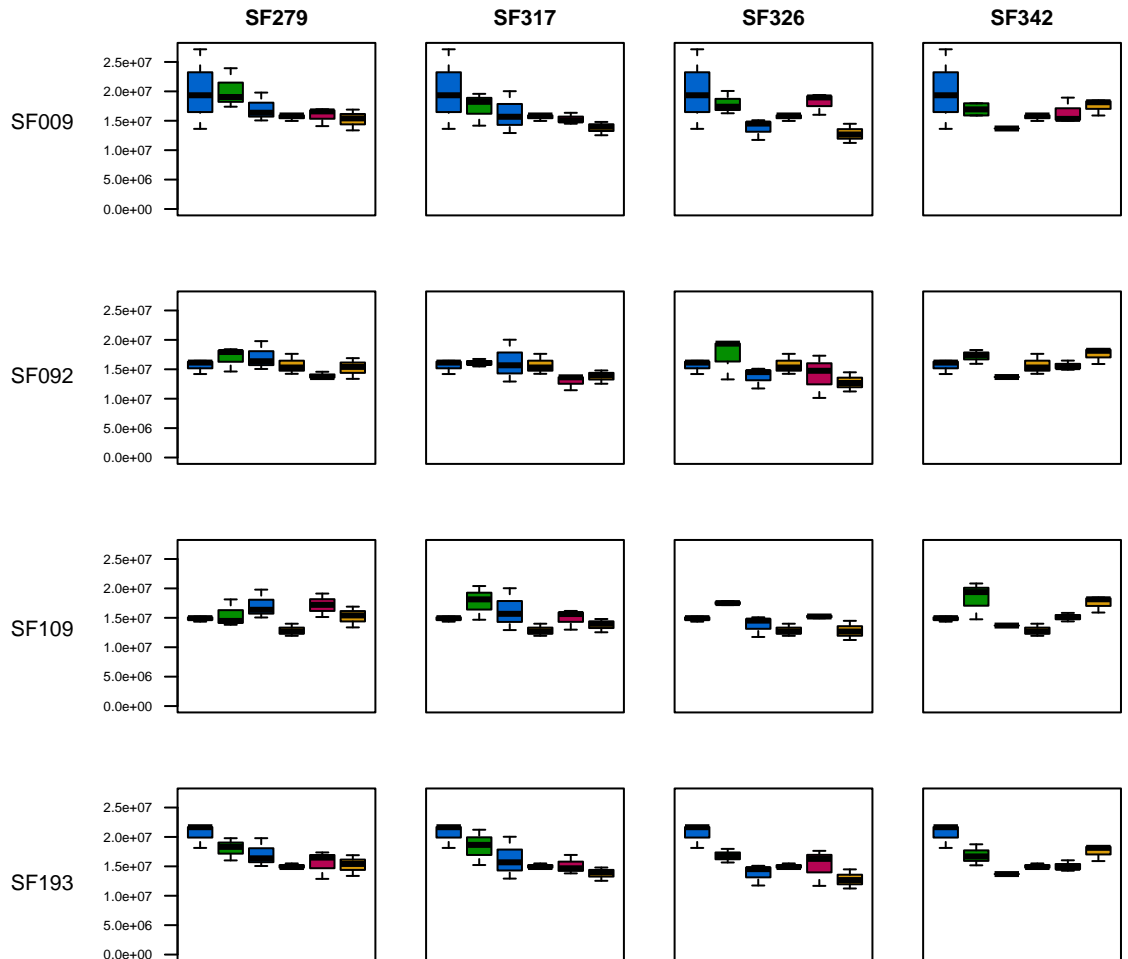

HanXRQChr08g0235871  
Probable NDH-dependent cyclic electron  
flow 1

Parents WW  
Parents WD  
Hybrids WW  
Hybrids WD

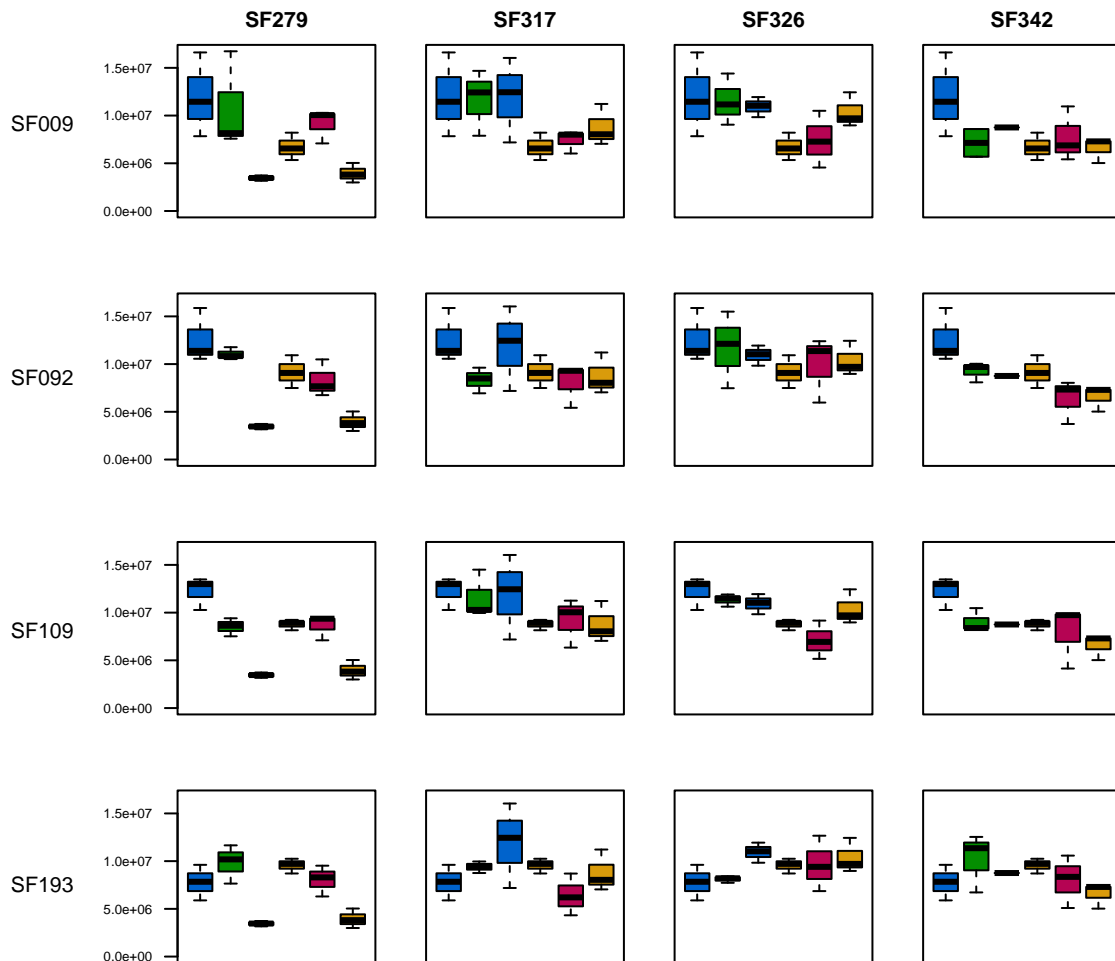

HanXRQChr16g0509531  
Probable NADP-dependent malic enzyme

Parents WW  
Parents WD  
Hybrids WW  
Hybrids WD

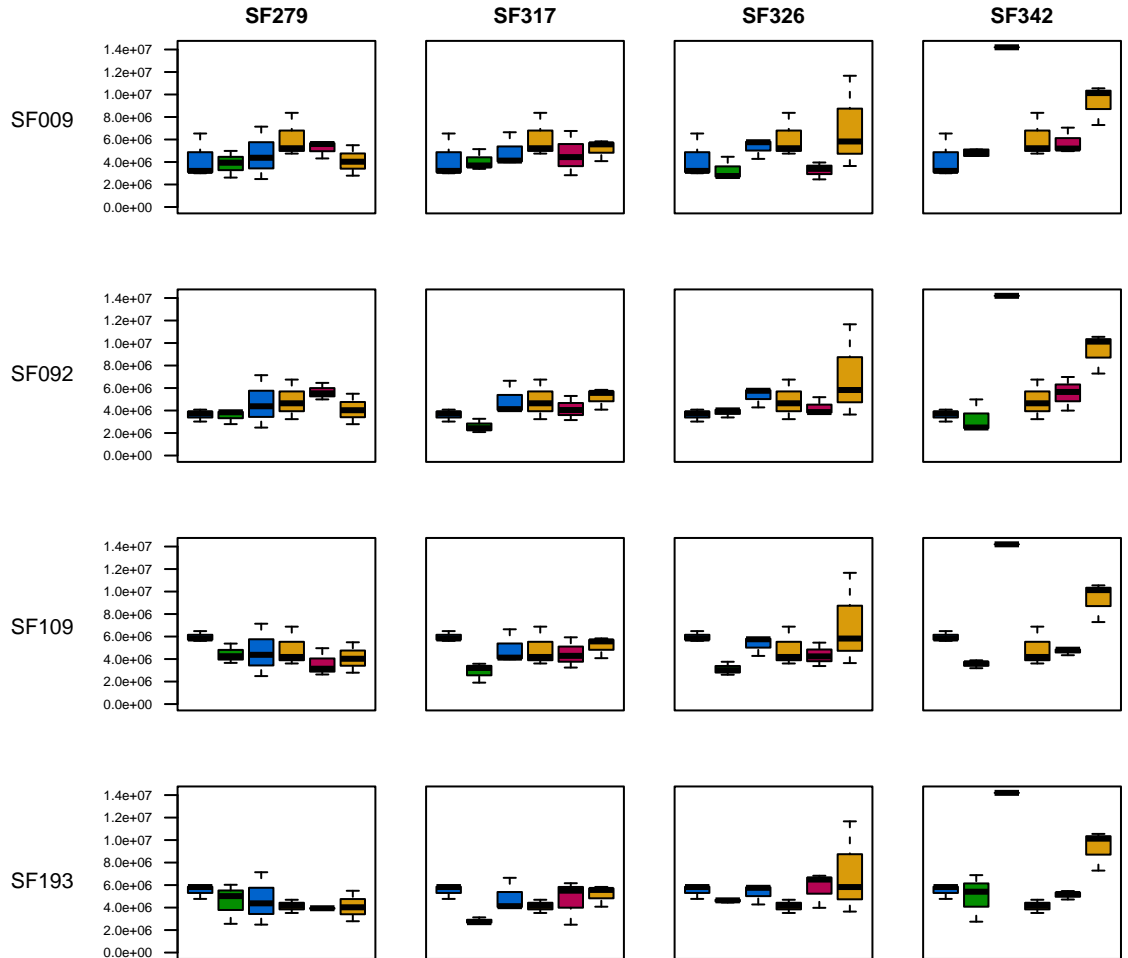

HanXRQChr03g0060421  
Probable alkaline-phosphatase-like  
family protein

Parents WW  
Parents WD  
Hybrids WW  
Hybrids WD

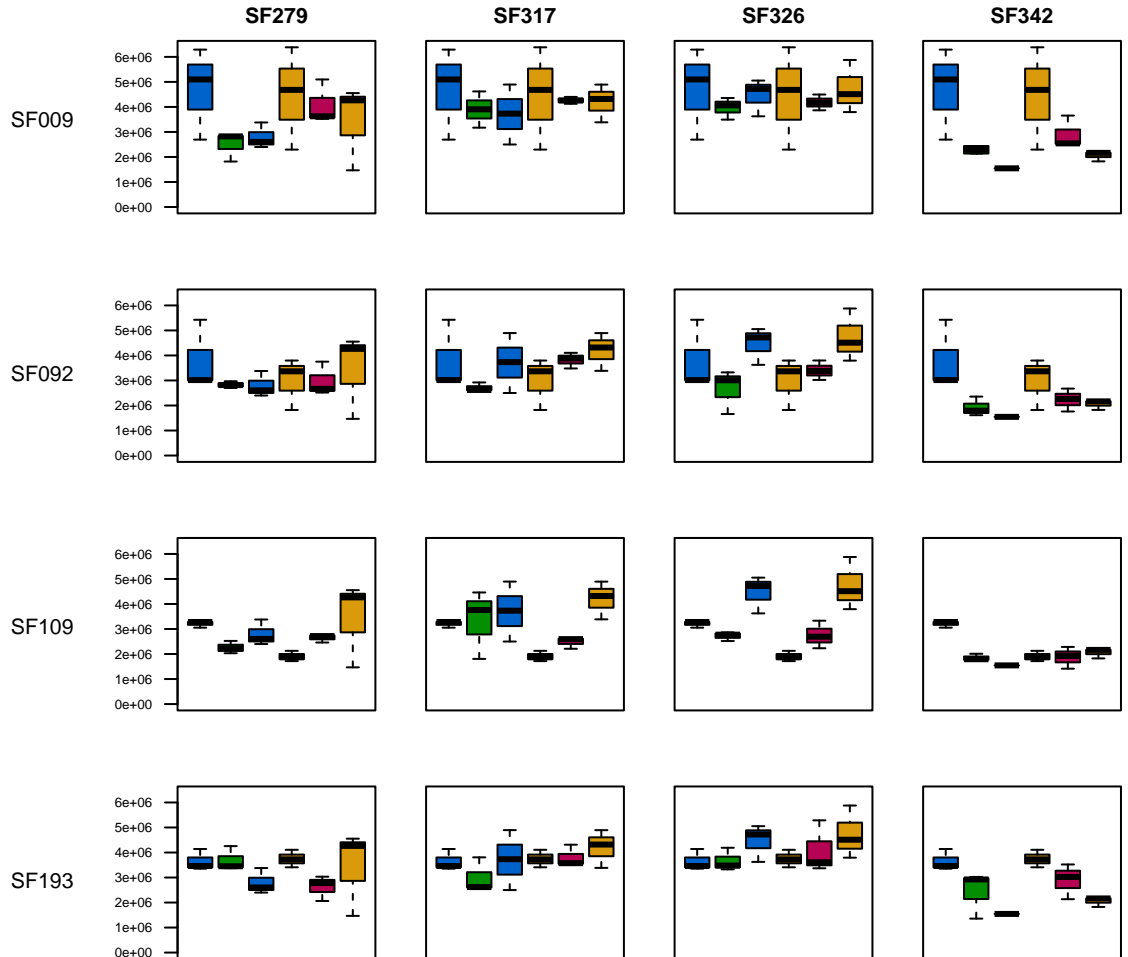

HanXRQChr06g0177581  
Putative S-crystallin

- Parents WW
- Parents WD
- Hybrids WW
- Hybrids WD

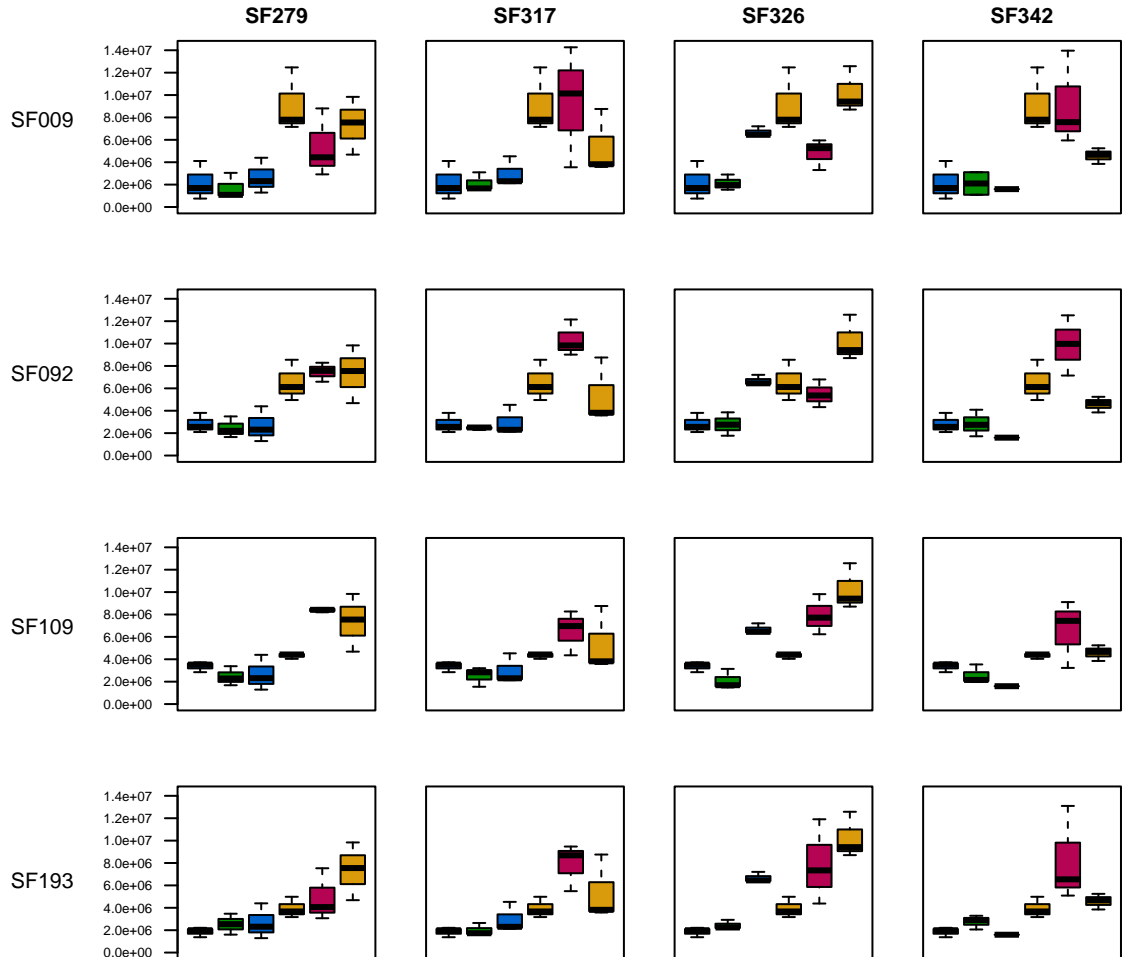



HanXRQChr09g0273861  
 Probable glycosyl hydrolase family 38  
 protein

Parents WW  
 Parents WD  
 Hybrids WW  
 Hybrids WD

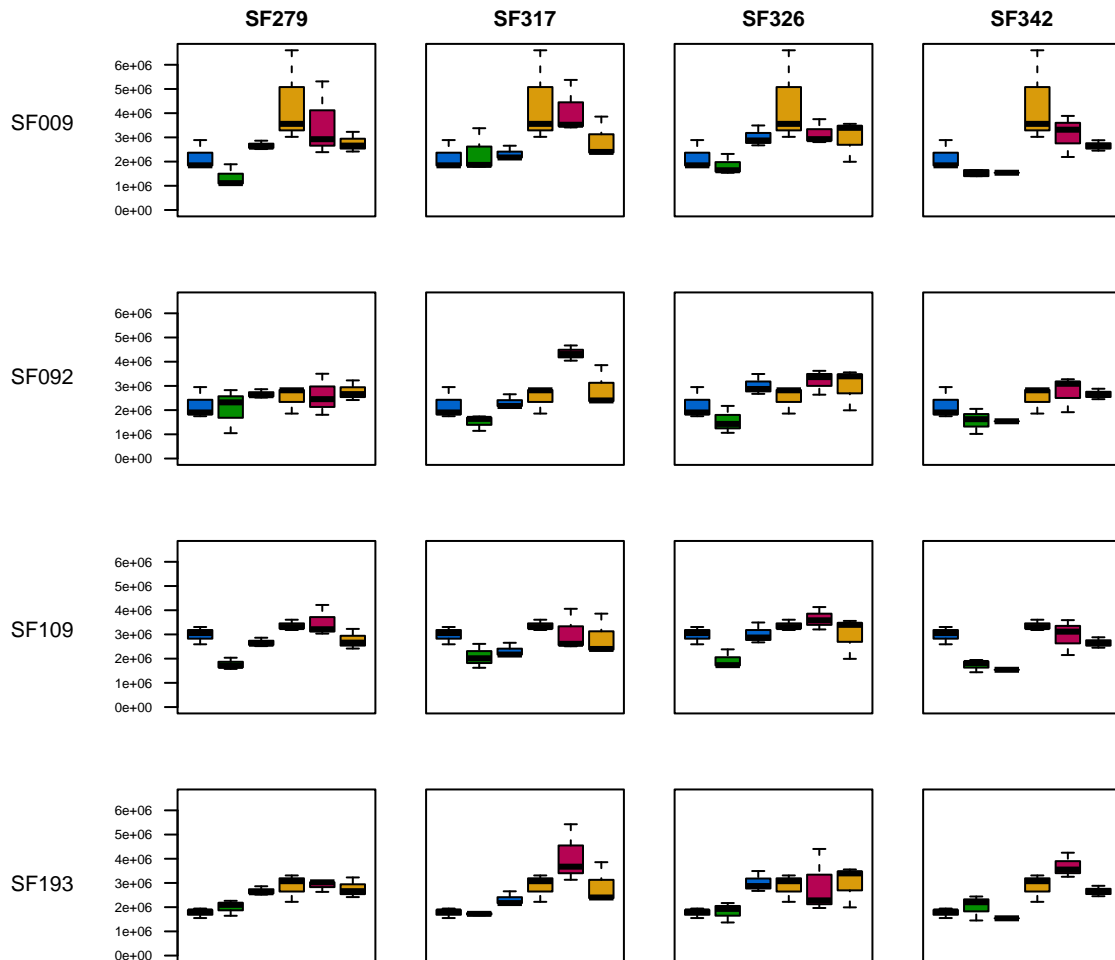

HanXRQChr10g0295971  
Probable thioesterase superfamily  
protein

Parents WW  
Parents WD  
Hybrids WW  
Hybrids WD

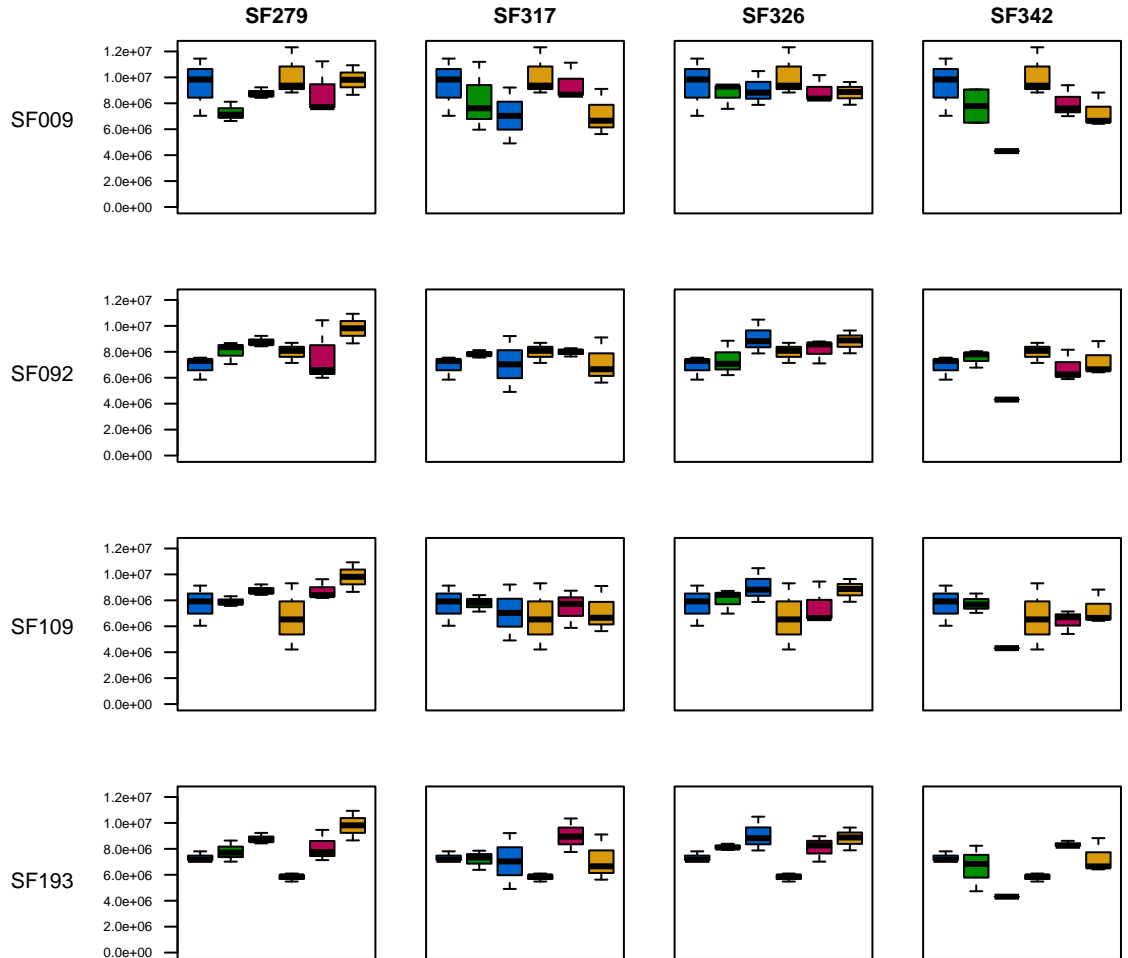

HanXRQChr03g0077621  
Probable tyrosyl-tRNA synthetase, class  
Ib, bacterial/mitochondrial

Parents WW  
Parents WD  
Hybrids WW  
Hybrids WD

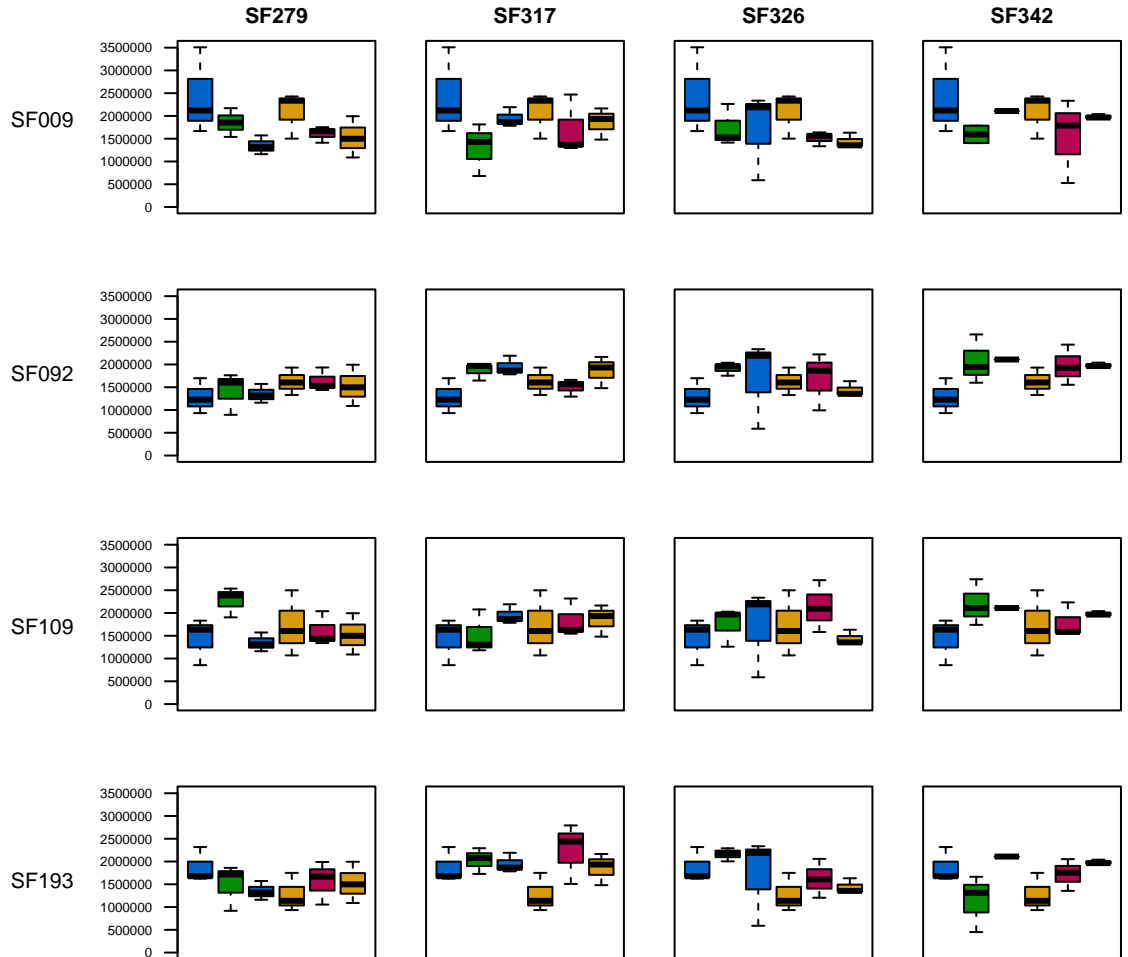

HanXRQChr01g0015821  
Protein of unknown function, DUF642

Parents WW  
Parents WD  
Hybrids WW  
Hybrids WD

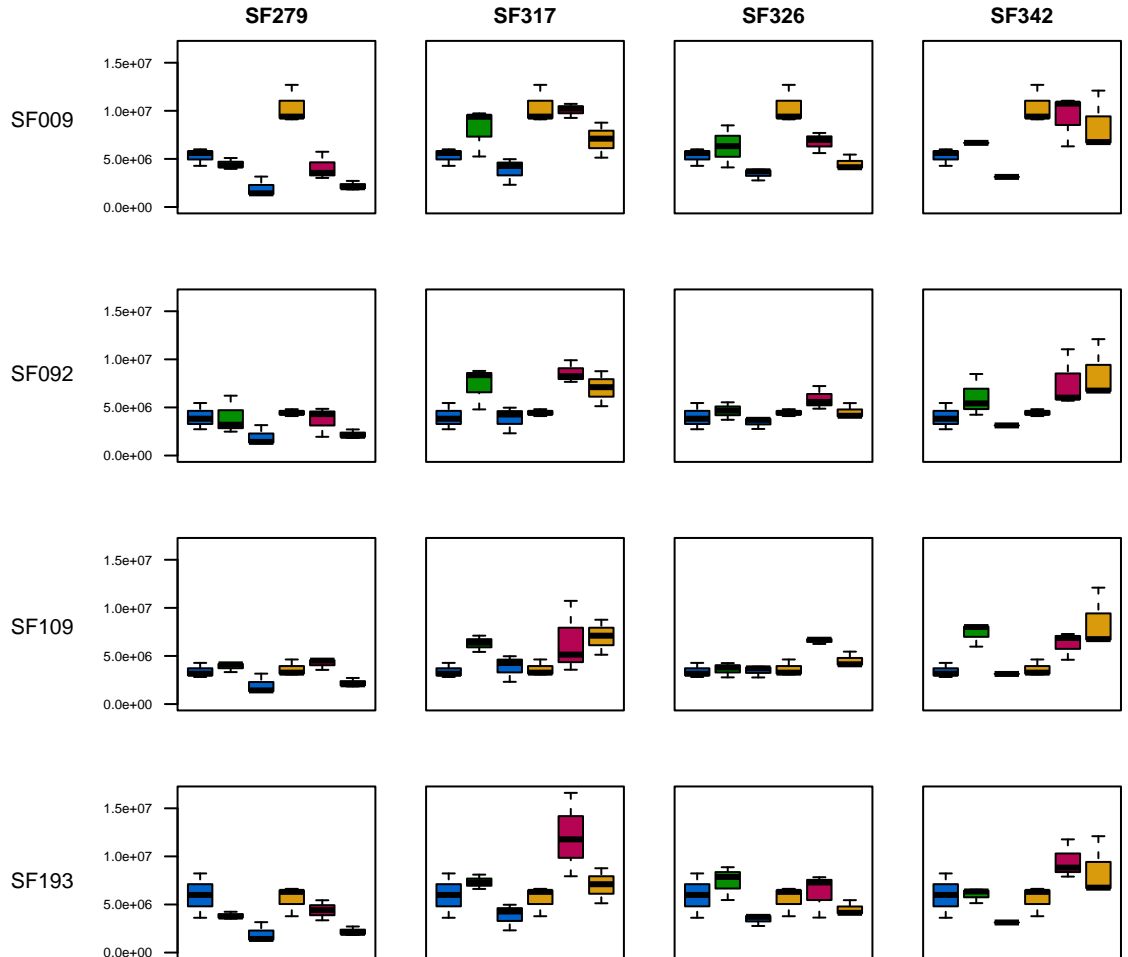

HanXRQChr04g0118391  
Putative  
3-oxoacyl-[acyl-carrier-protein] synthase :

Parents WW  
Parents WD  
Hybrids WW  
Hybrids WD

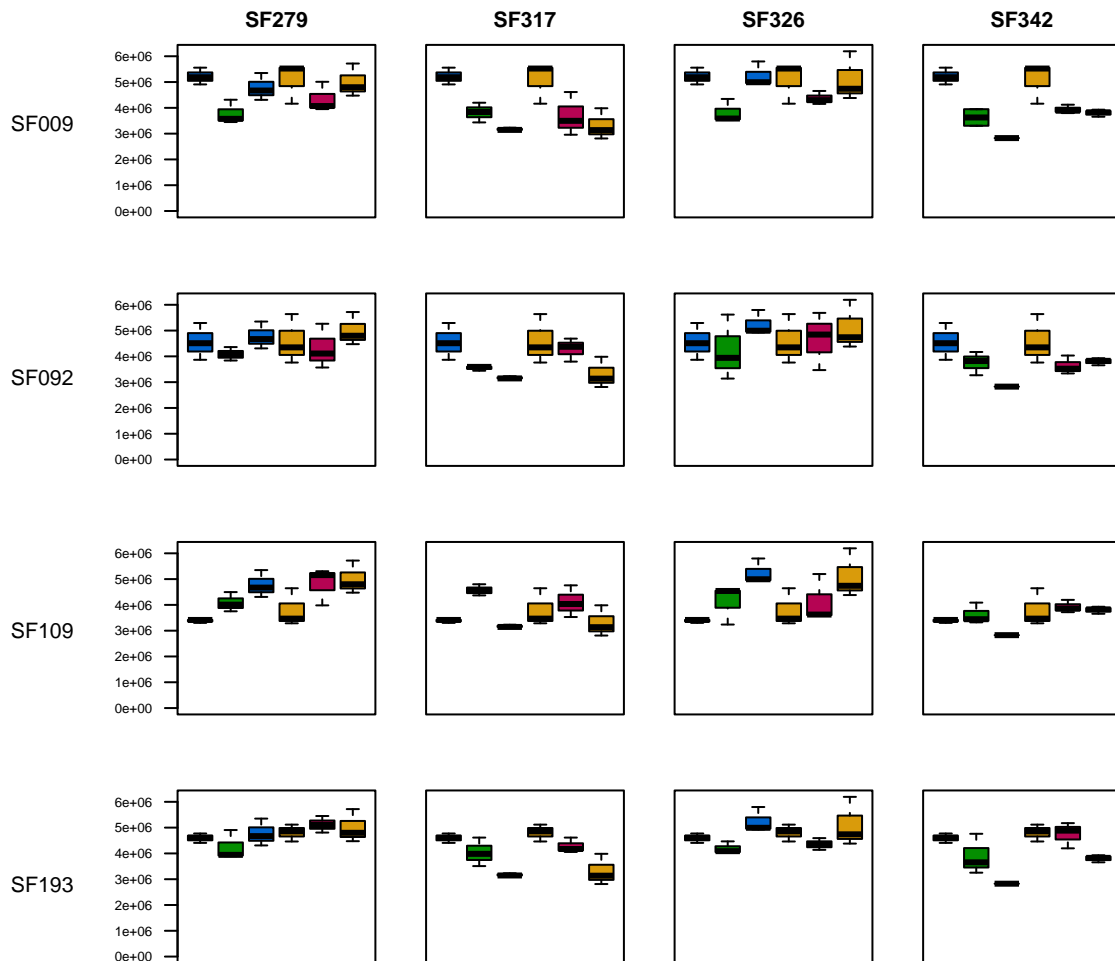

HanXRQChr16g0530621  
Probable galactose mutarotase-like  
superfamily protein

Parents WW  
Parents WD  
Hybrids WW  
Hybrids WD

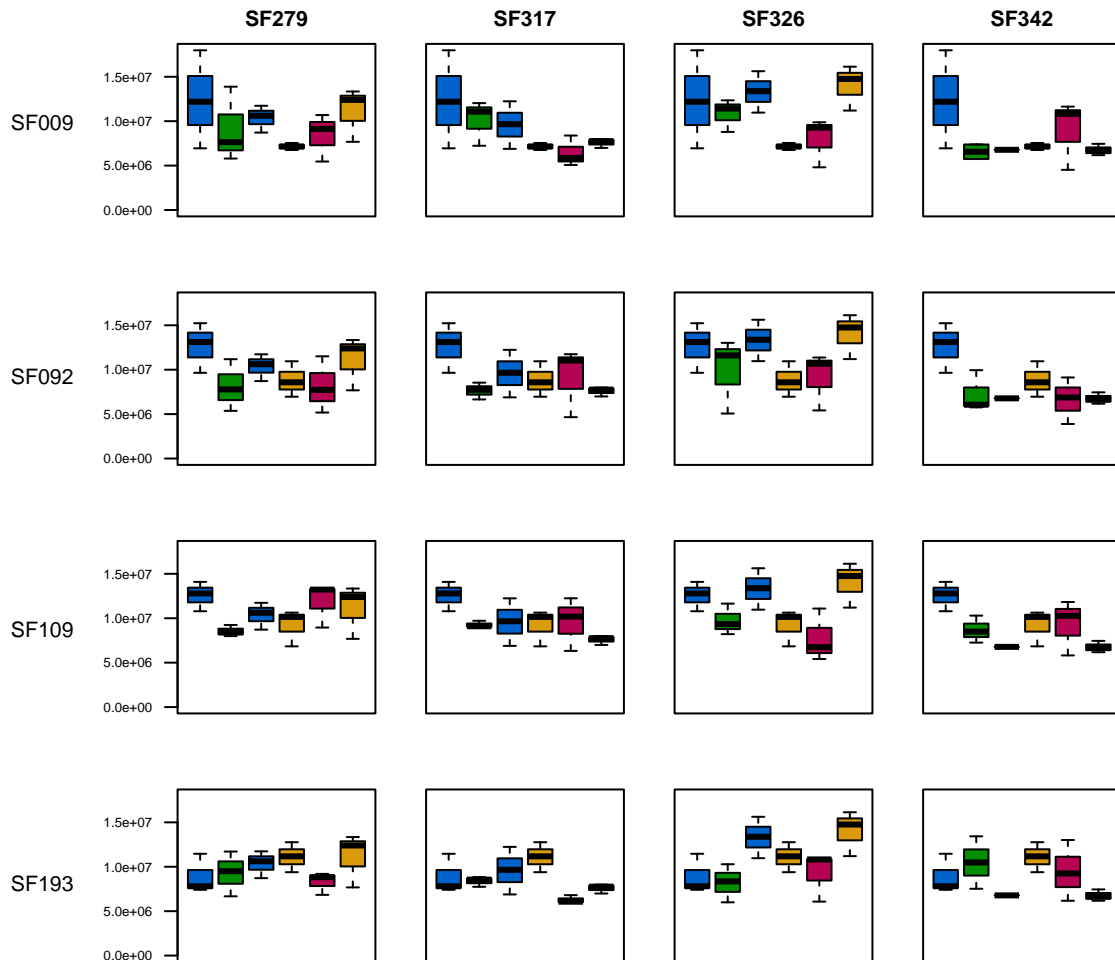

HanXRQChr03g0079161  
 Putative ubiquitin-conjugating  
 enzyme/RWD-like; Ubiquitin-conjugating e

Parents WW  
 Parents WD  
 Hybrids WW  
 Hybrids WD

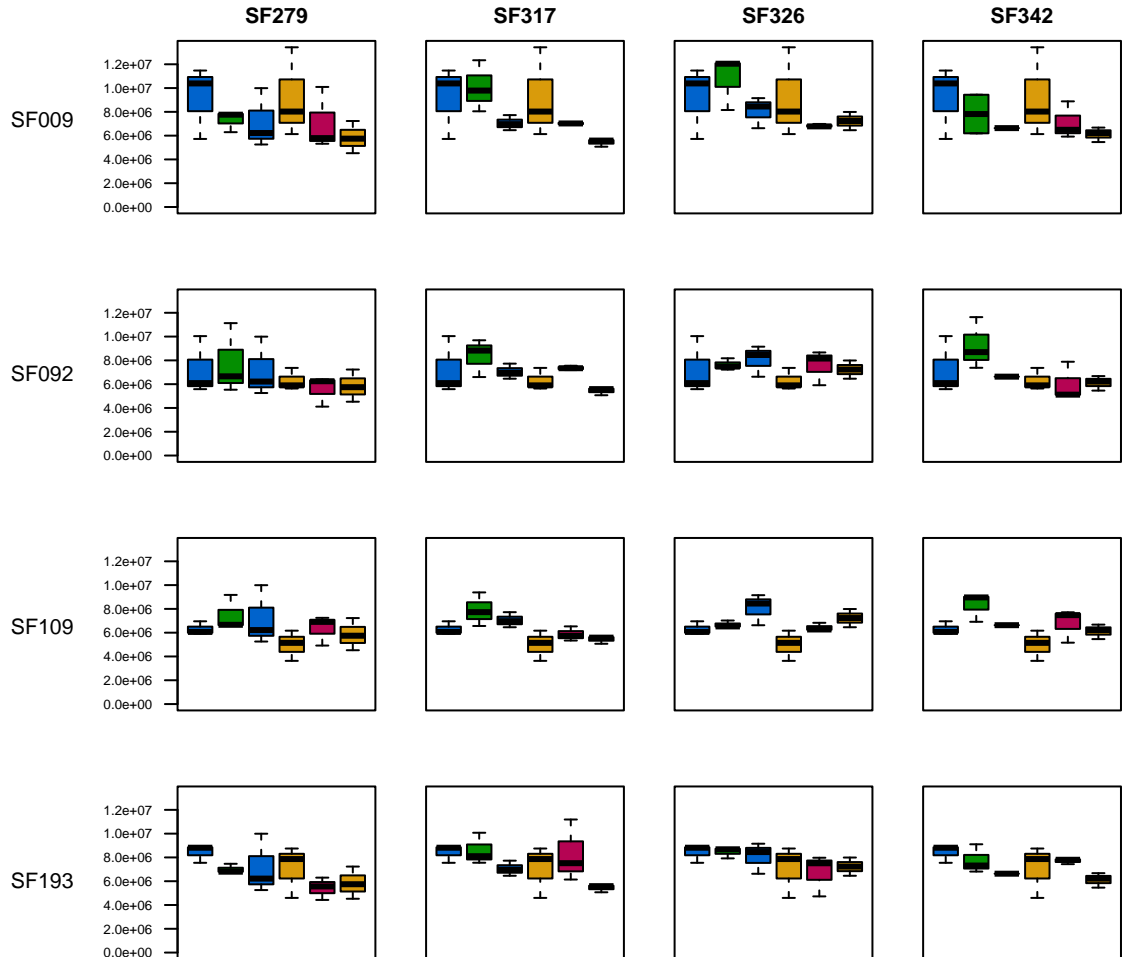

HanXRQChr01g0014971  
Probable photosystem II reaction center  
PSB28 protein, chloroplastic

Parents WW  
Parents WD  
Hybrids WW  
Hybrids WD

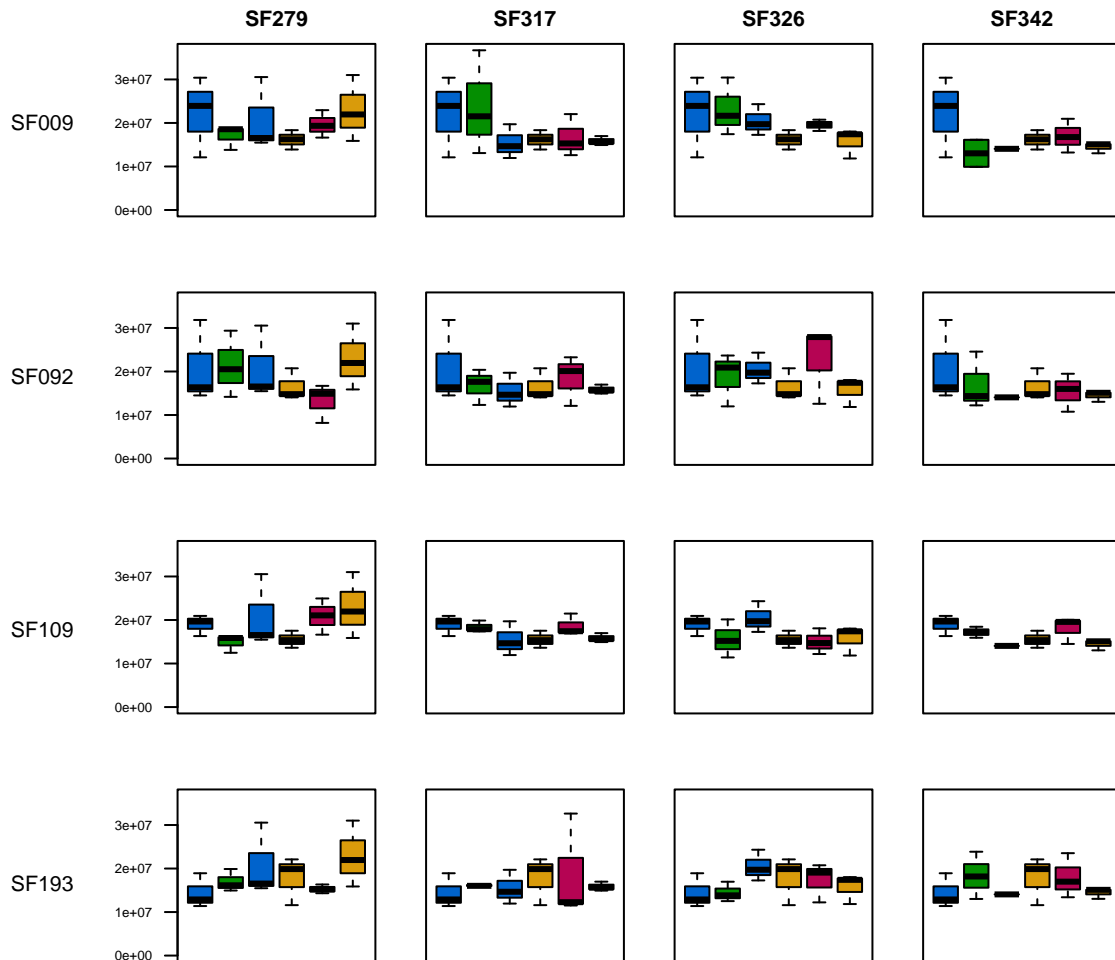



HanXRQChr01g0014531  
 Probable serine protease inhibitor,  
 potato inhibitor I-type family protein

Parents WW  
 Parents WD  
 Hybrids WW  
 Hybrids WD

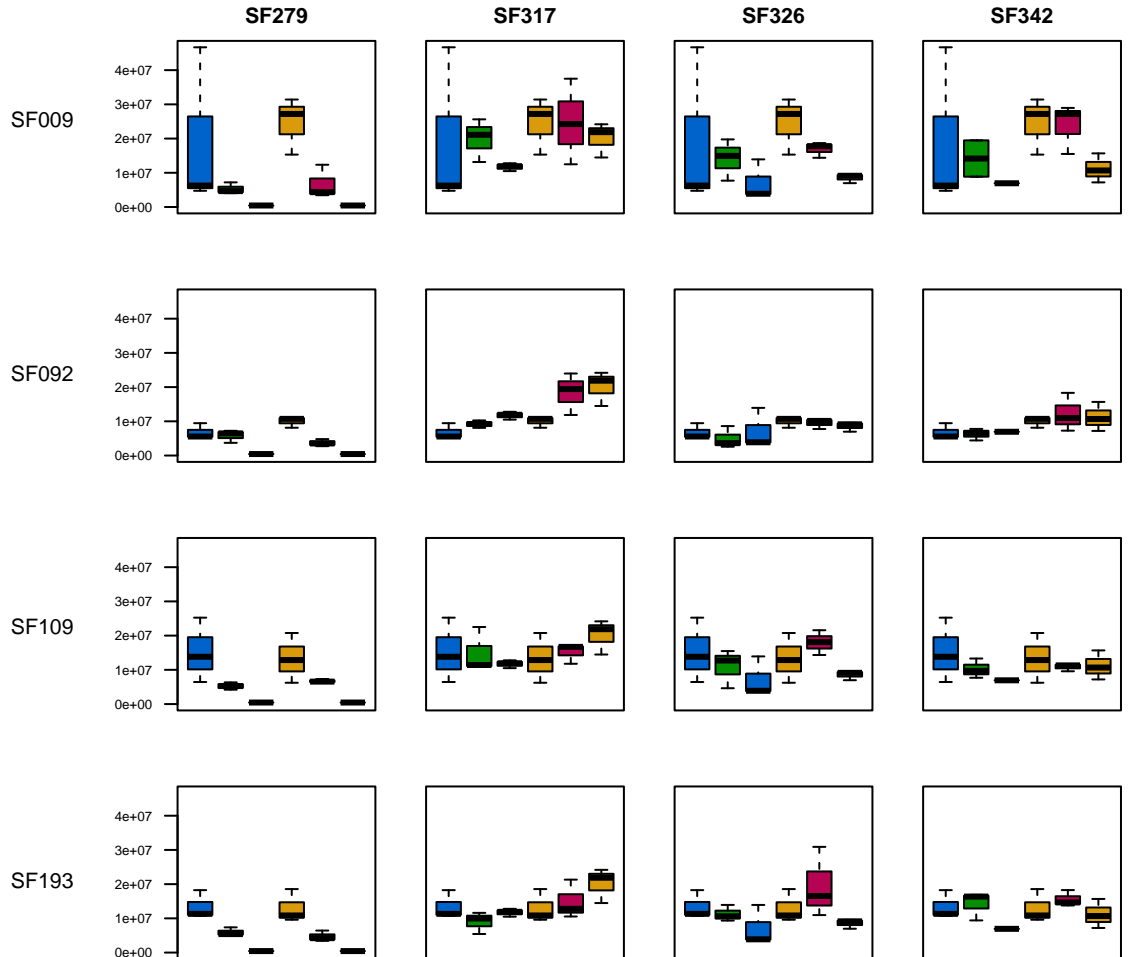

HanXRQChr06g0168141  
 Putative WD40/YVTN  
 repeat-like-containing domain; Alpha/Beta

■ Parents WW  
 ■ Parents WD  
 ■ Hybrids WW  
 ■ Hybrids WD

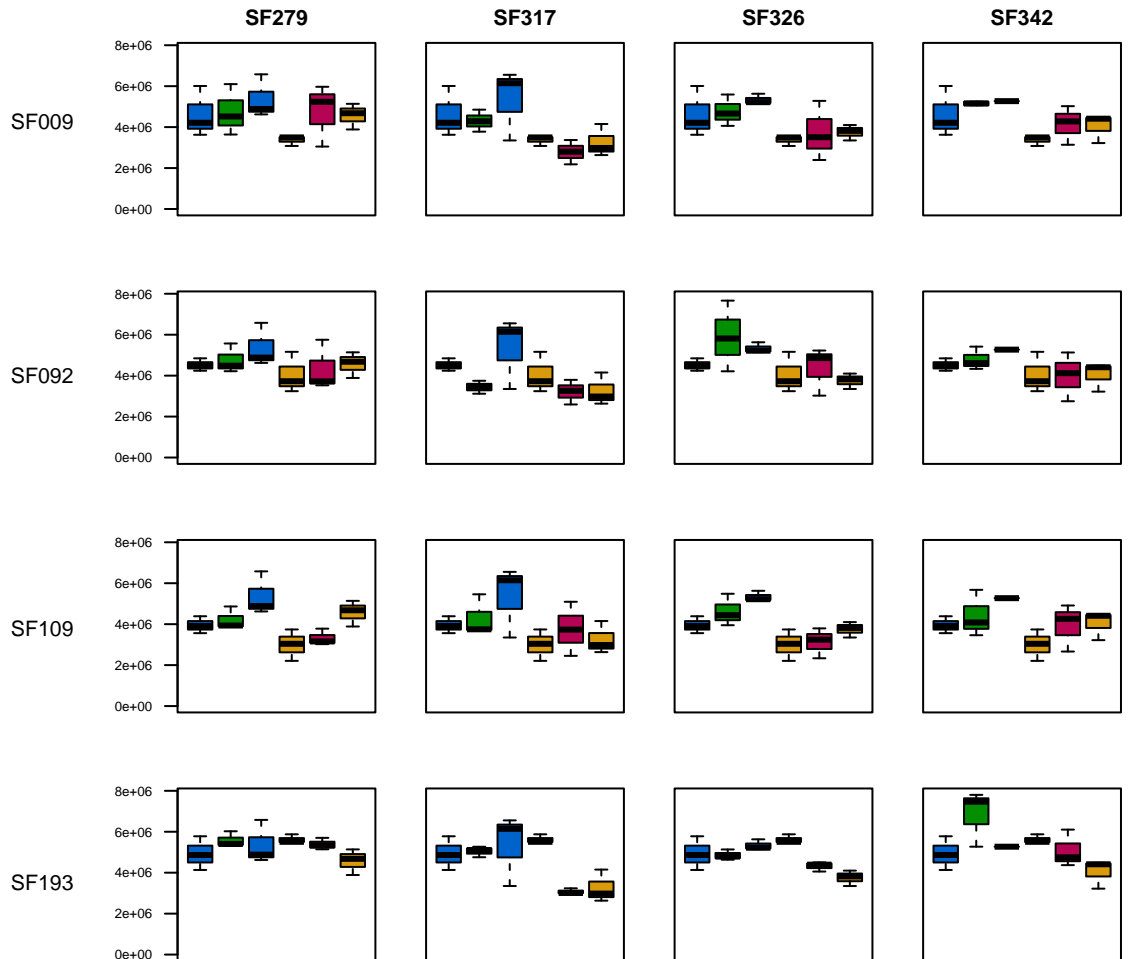

HanXRQChr05g0132391  
Probable protein phosphatase 2C 1

Parents WW  
Parents WD  
Hybrids WW  
Hybrids WD

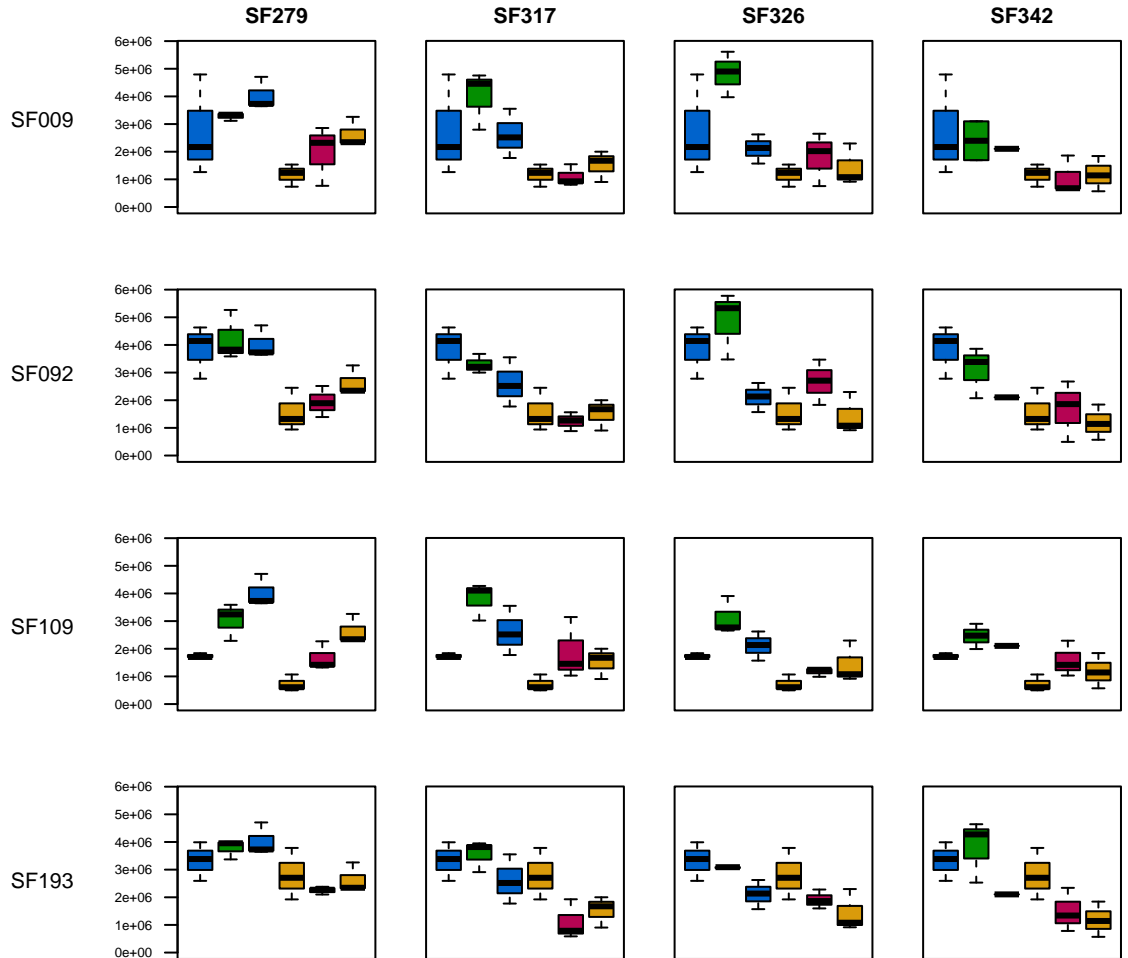

HanXRQChr08g0228441  
Probable translocon at the inner  
envelope membrane of chloroplasts 110

Parents WW  
Parents WD  
Hybrids WW  
Hybrids WD

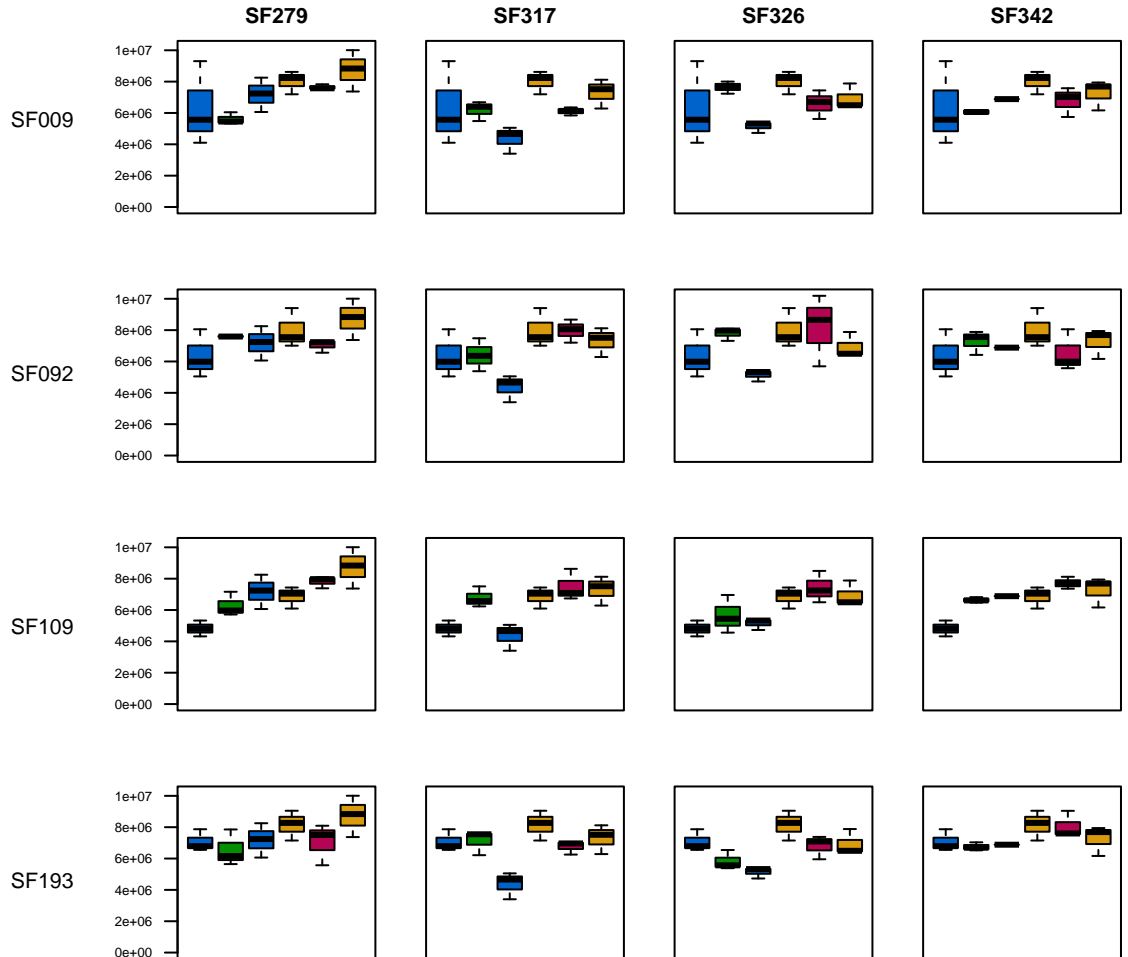

HanXRQChr03g0091441  
 Probable NAD(P)-linked oxidoreductase  
 superfamily protein

Parents WW  
 Parents WD  
 Hybrids WW  
 Hybrids WD

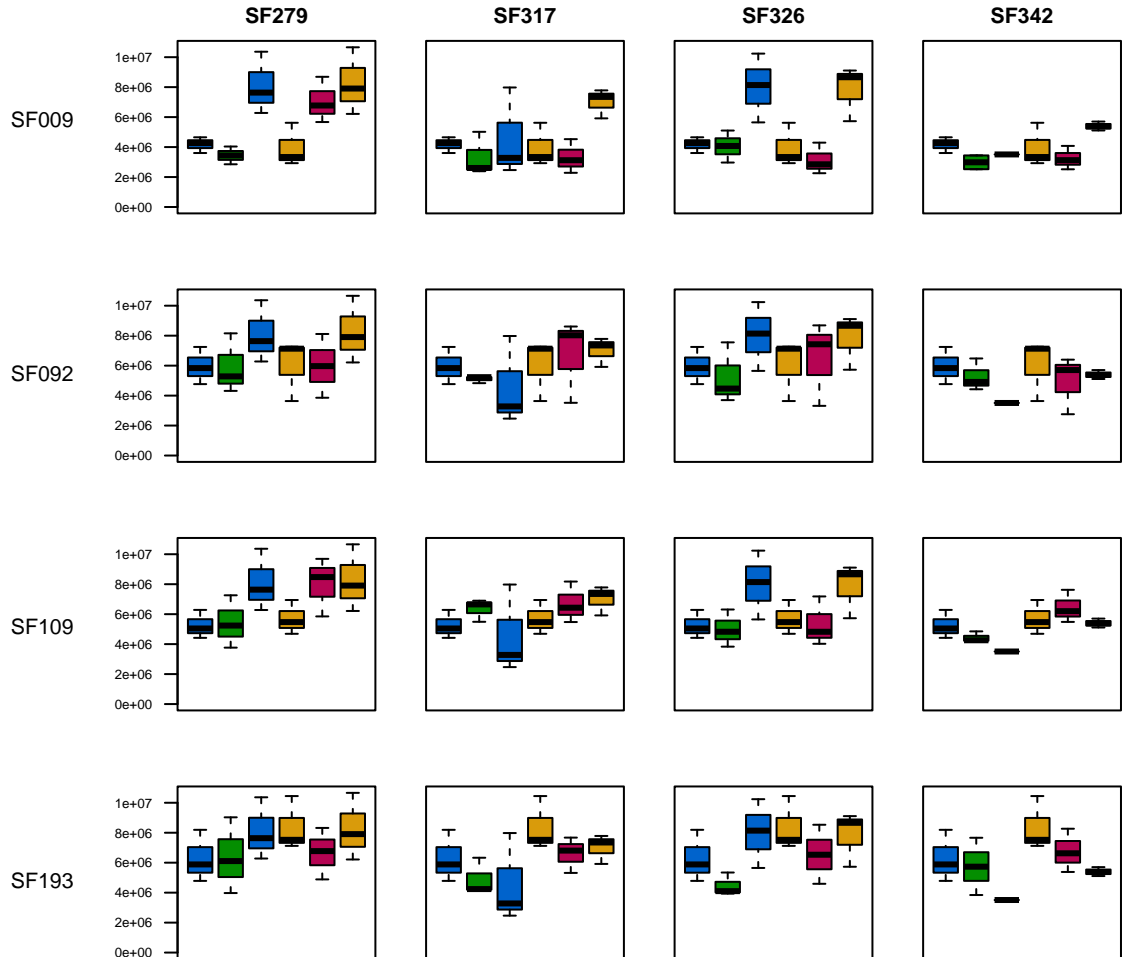

HanXRQChr08g0214081  
 Probable pleckstrin homology (PH)  
 domain superfamily protein

Parents WW  
 Parents WD  
 Hybrids WW  
 Hybrids WD

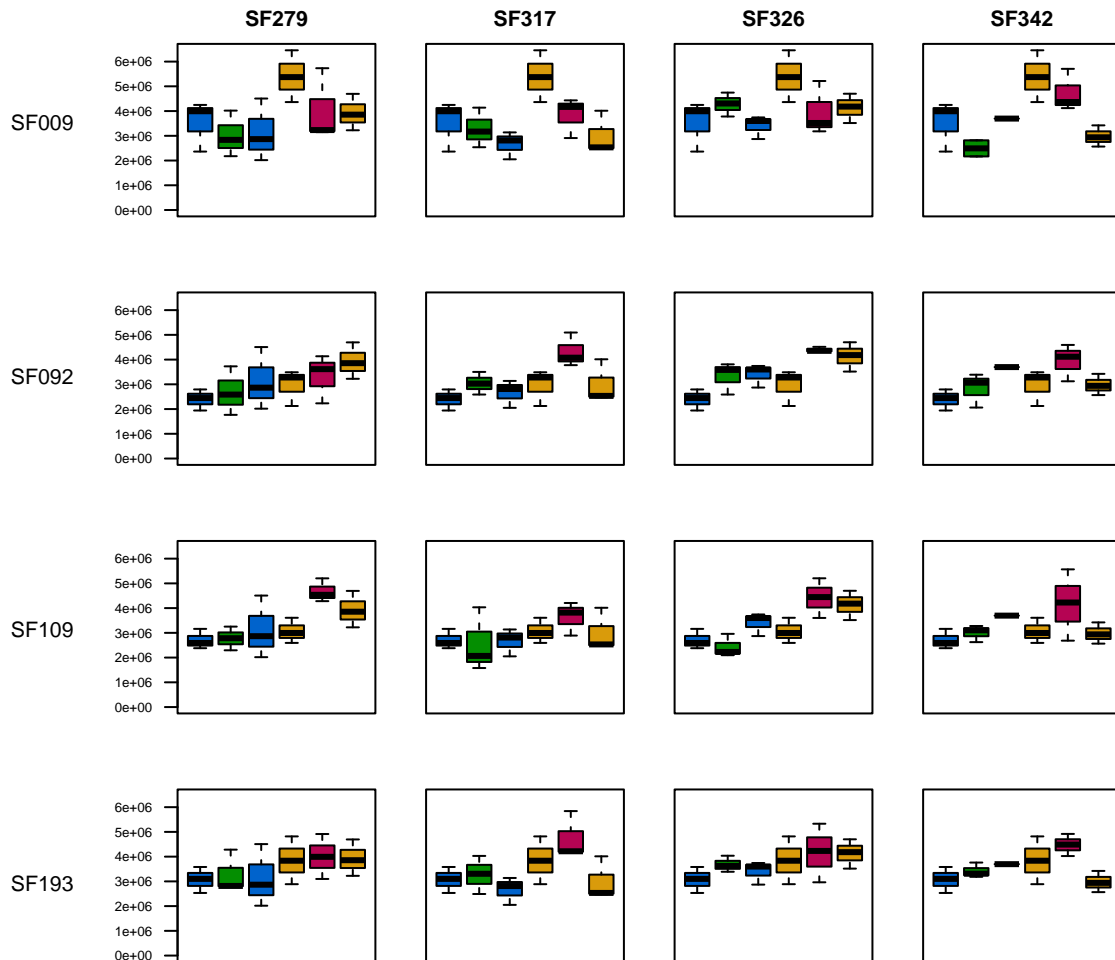

HanXRQChr05g0137991  
Probable Fe-S cluster assembly factor  
HCF101, chloroplastic

Parents WW  
Parents WD  
Hybrids WW  
Hybrids WD

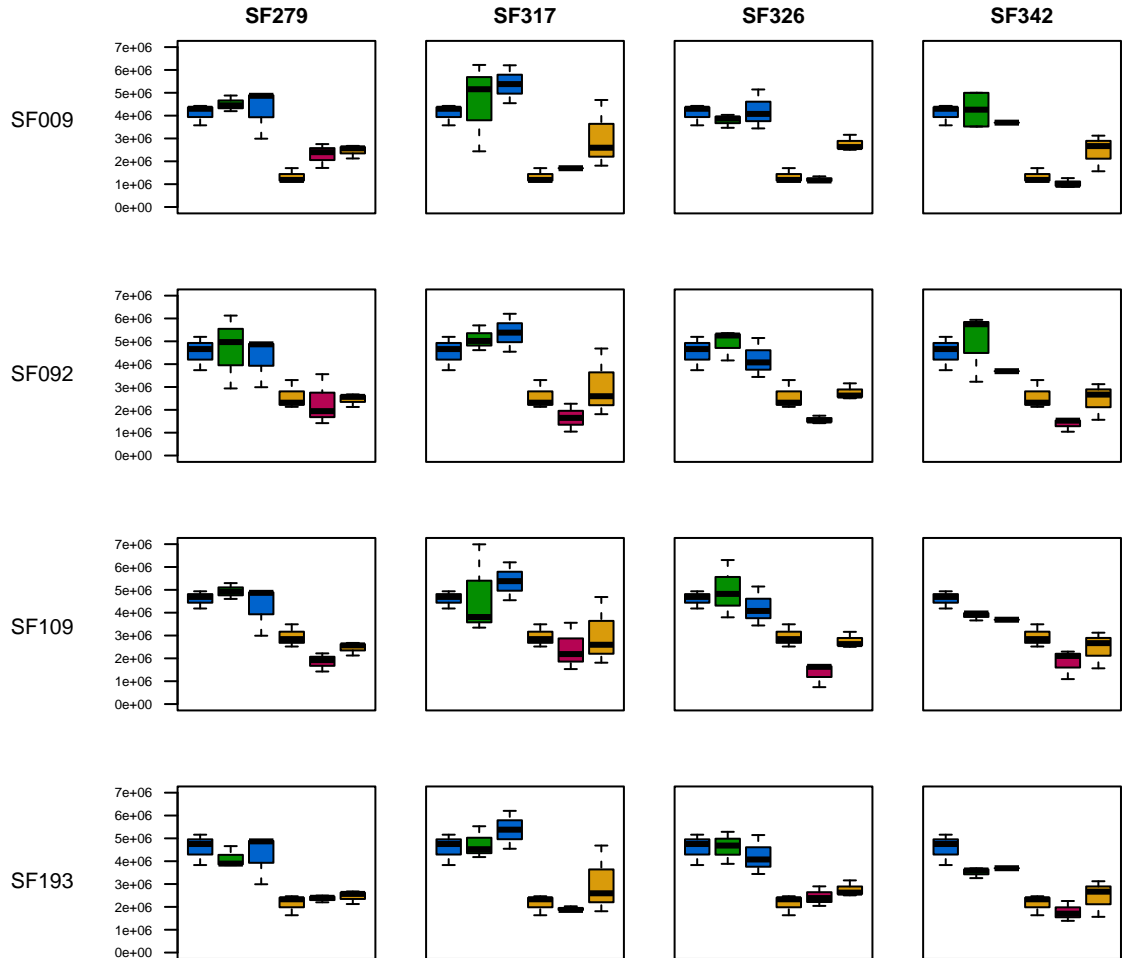

HanXRQChr10g0304191  
Putative glucose/ribitol dehydrogenase

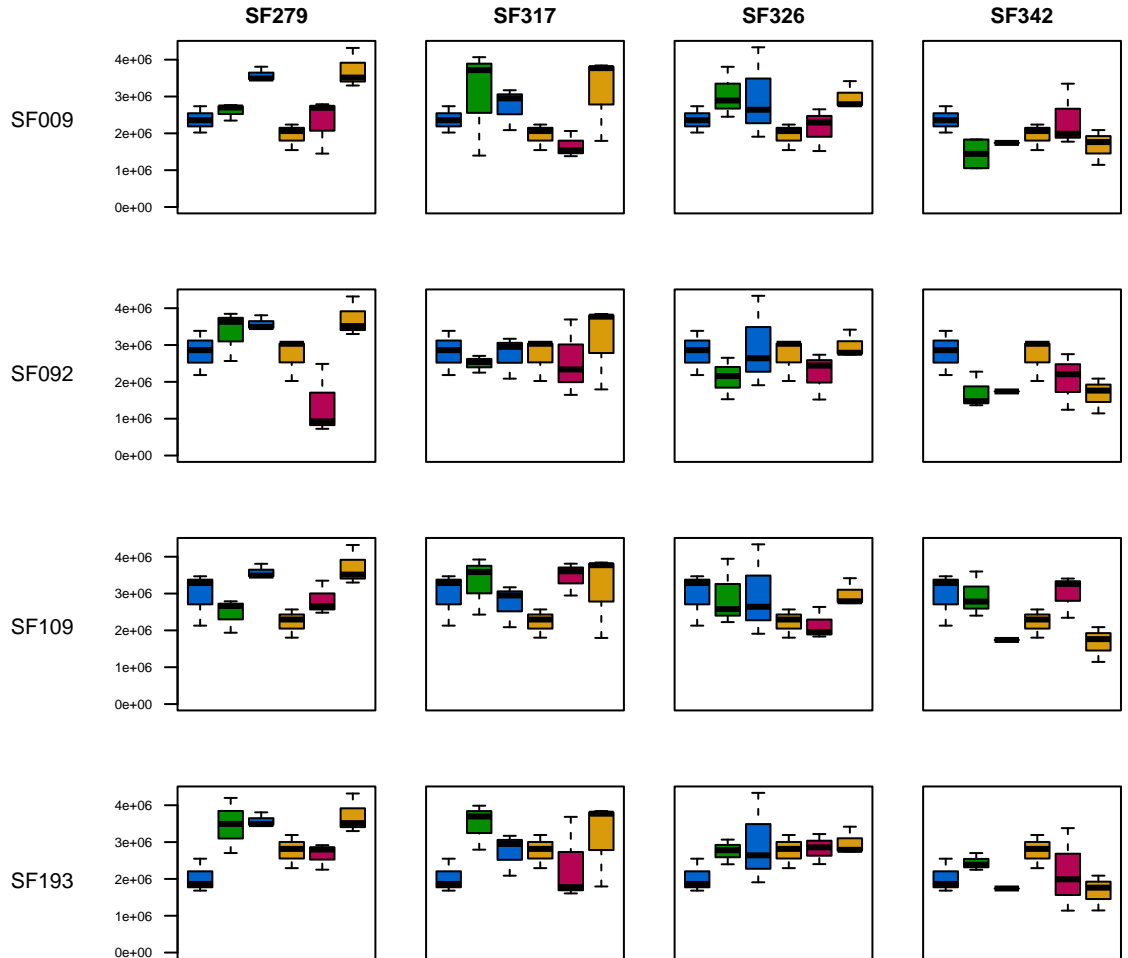



HanXRQChr03g0083681  
Putative heat shock protein 70 family;  
Heat shock protein 70kD, peptide-binding c

Parents WW  
Parents WD  
Hybrids WW  
Hybrids WD

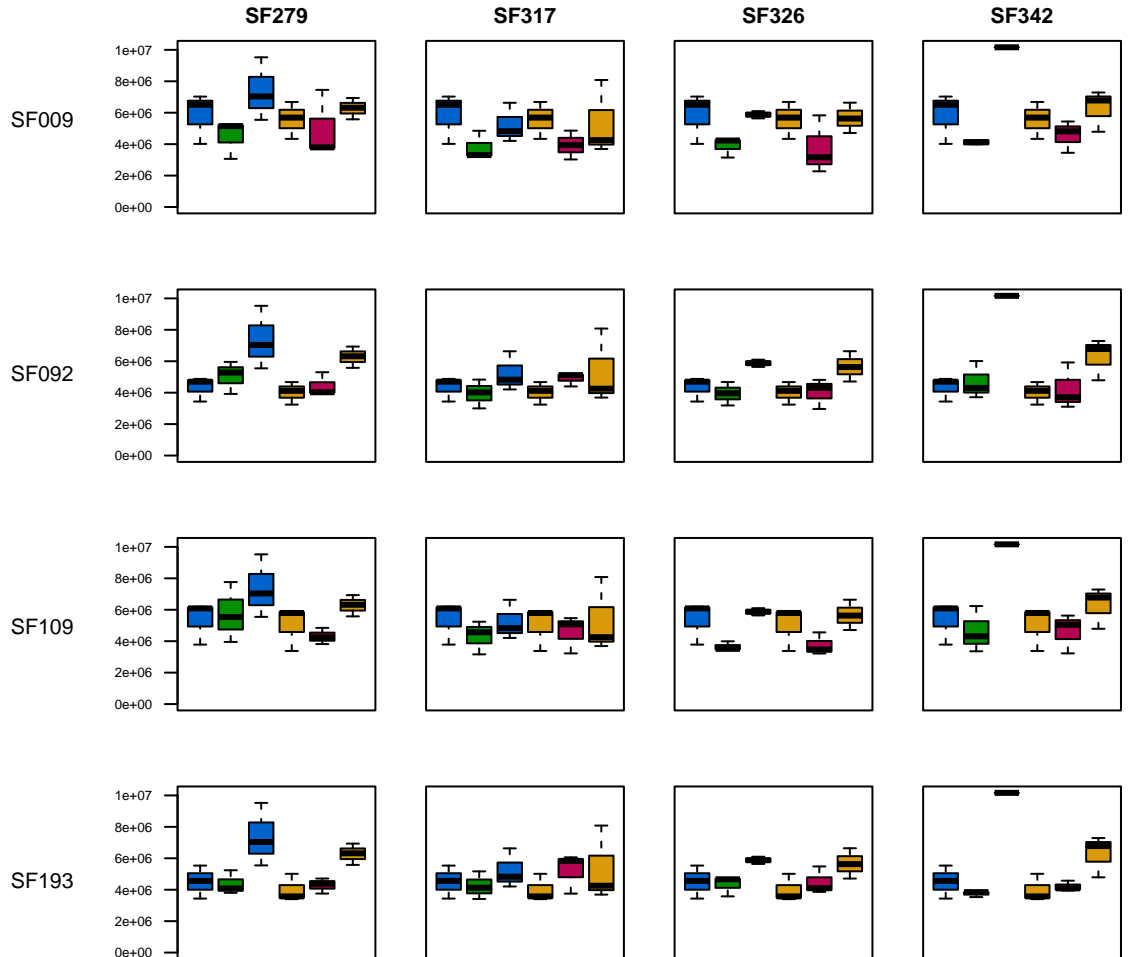

HanXRQChr04g0121491  
Probable remorin family protein

Parents WW  
Parents WD  
Hybrids WW  
Hybrids WD

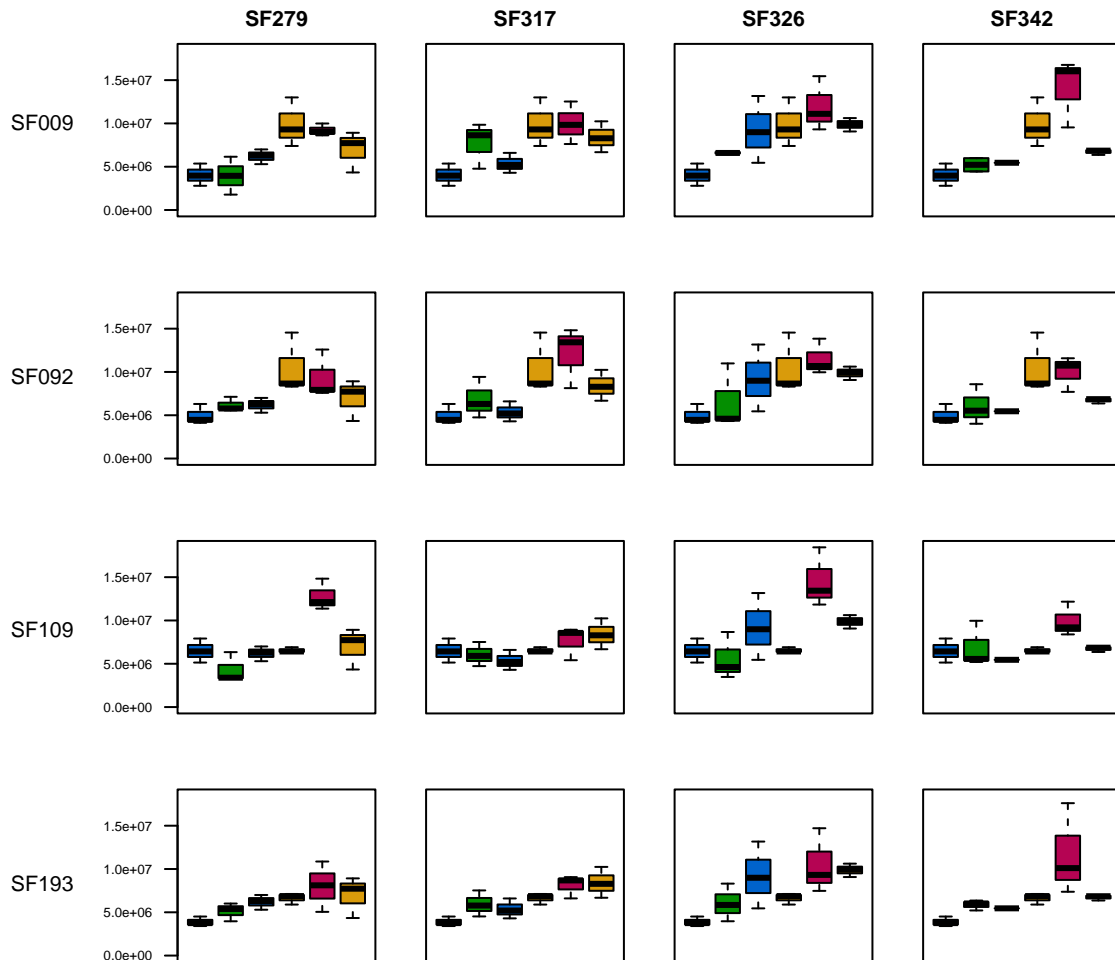

HanXRQChr04g0125641  
Probable adenine nucleotide alpha  
hydrolases-like superfamily protein

Parents WW  
Parents WD  
Hybrids WW  
Hybrids WD

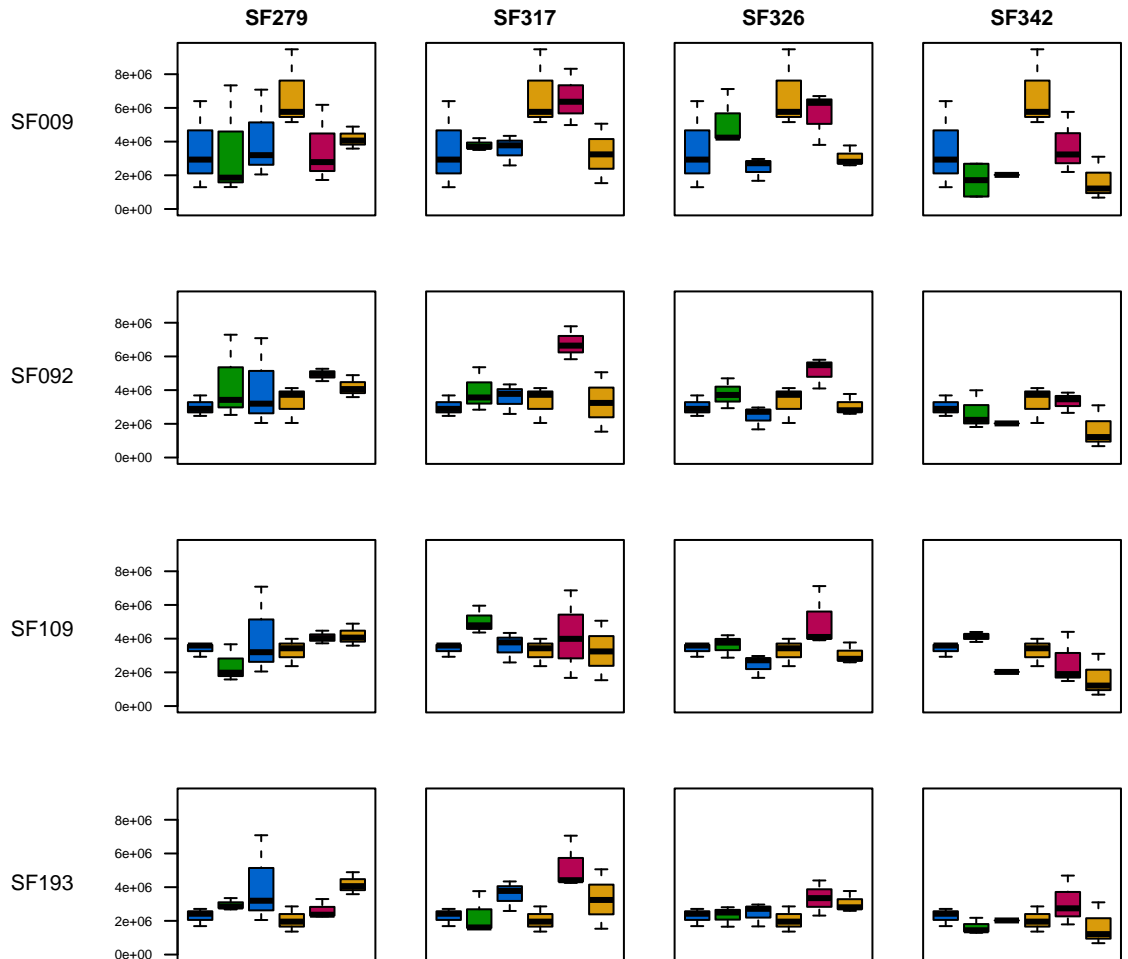

HanXRQChr12g0367491  
Probable citrate synthase 2

- Parents WW
- Parents WD
- Hybrids WW
- Hybrids WD

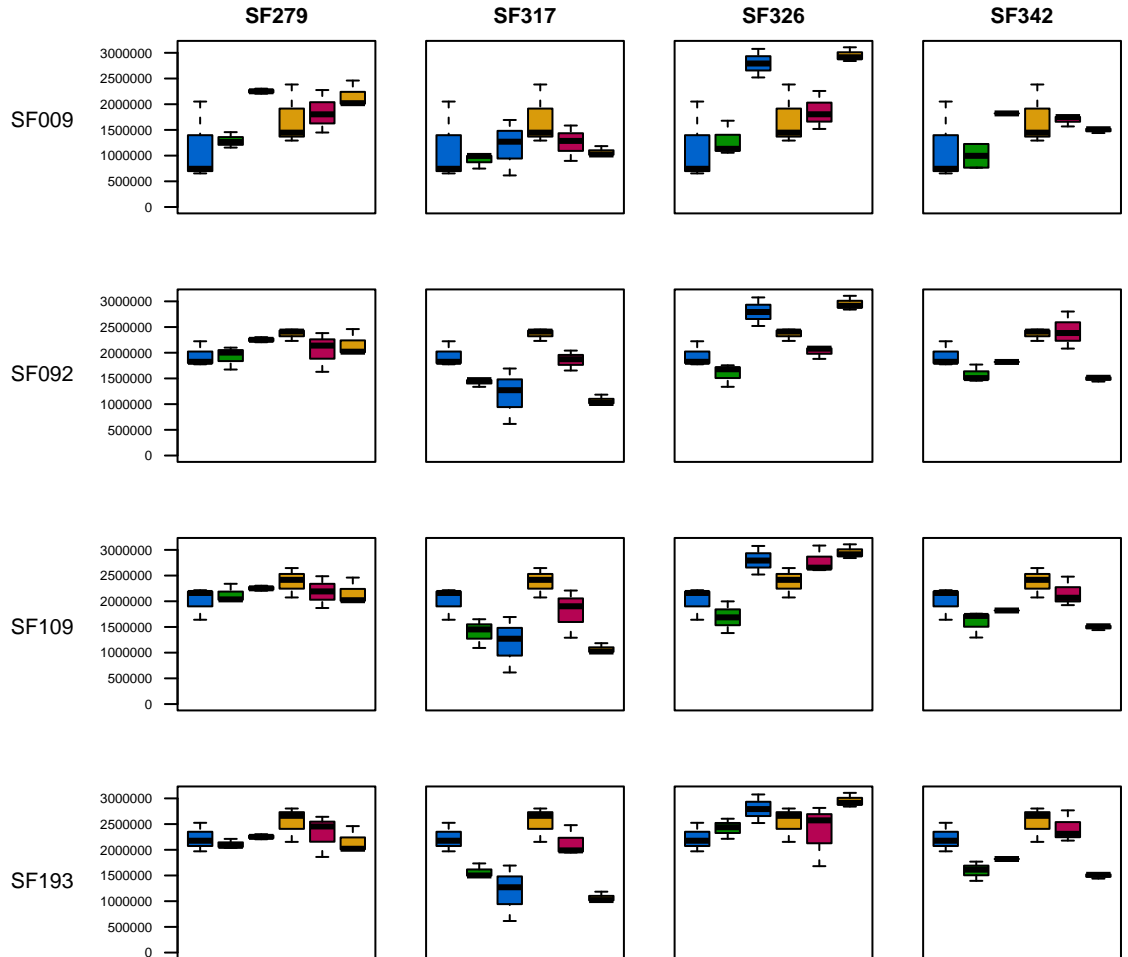

HanXRQChr02g0054321  
Probable apyrase 2

Parents WW  
Parents WD  
Hybrids WW  
Hybrids WD

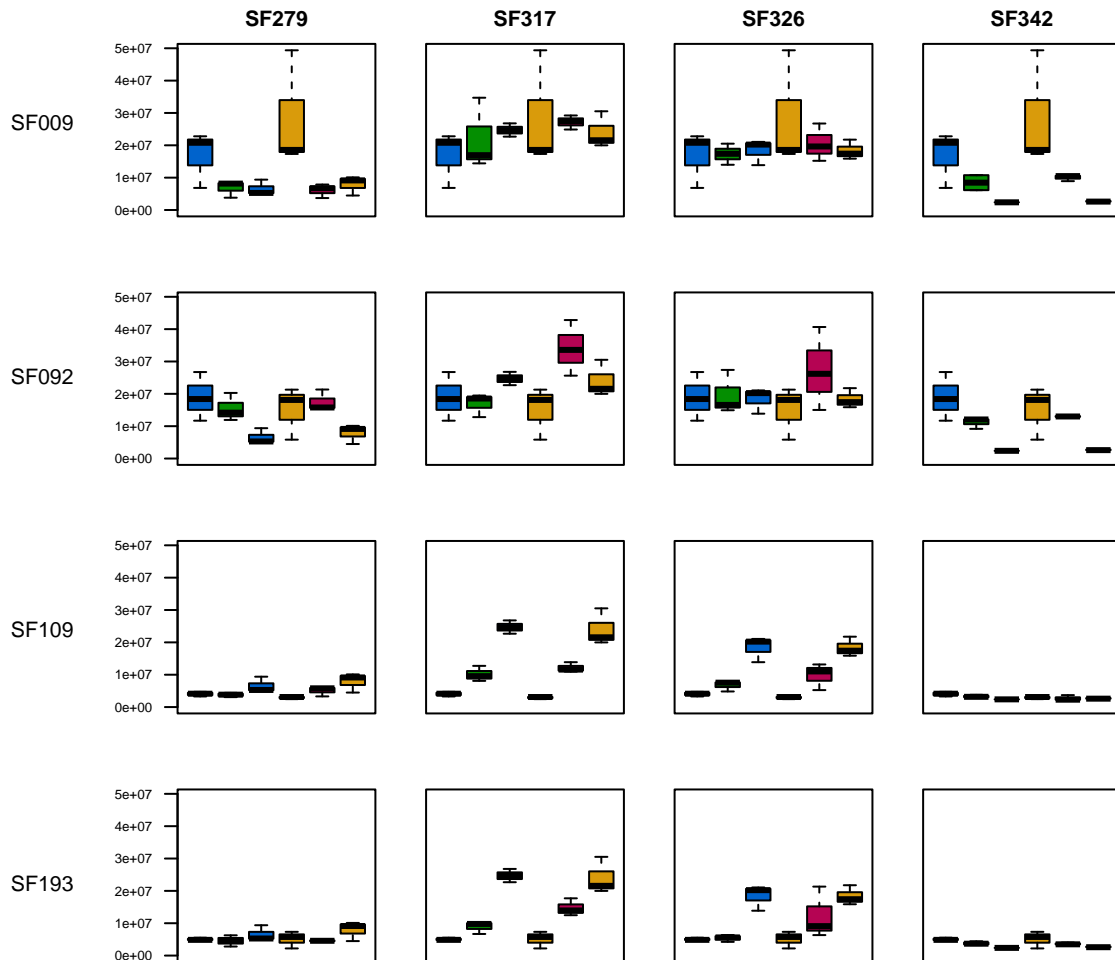

HanXRQChr10g0288911  
Probable tubulin beta-2 chain

Parents WW  
Parents WD  
Hybrids WW  
Hybrids WD

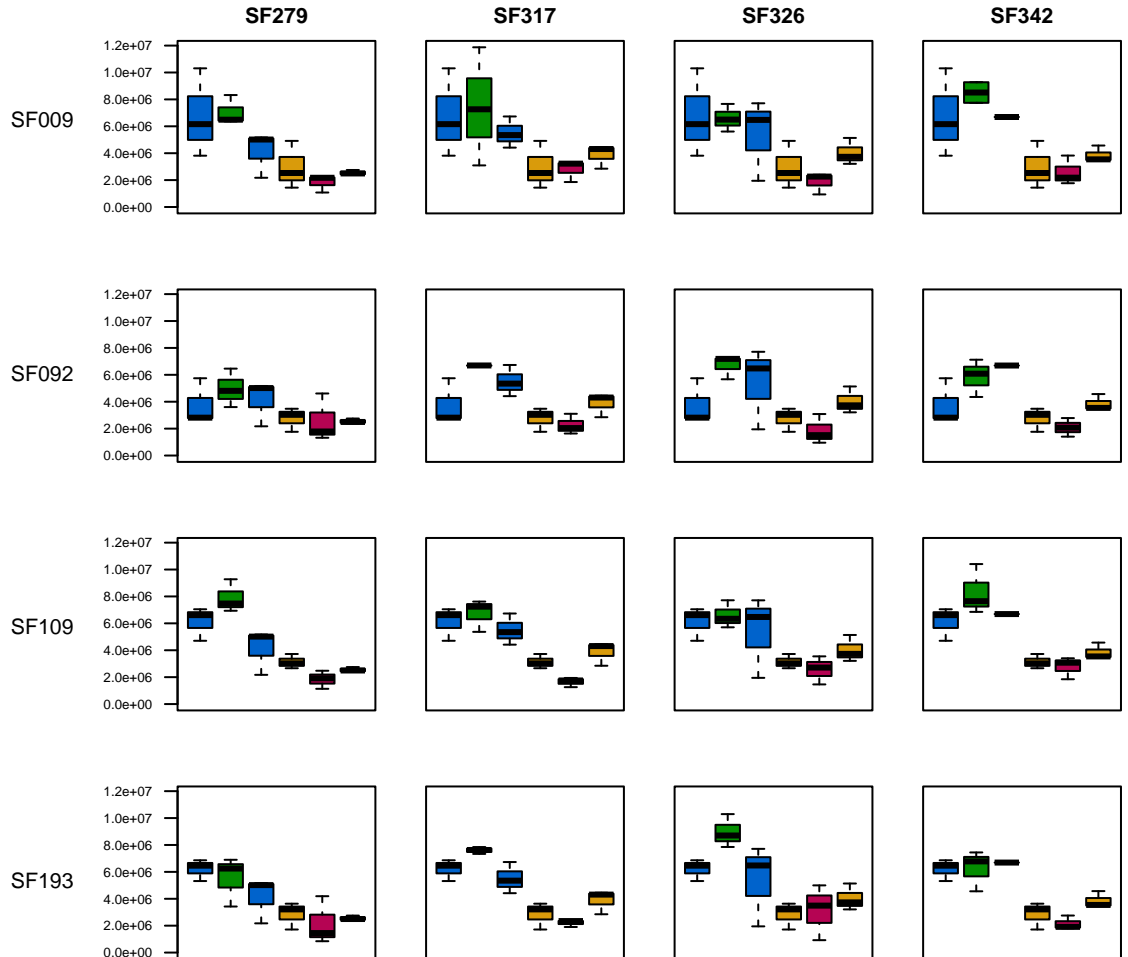

HanXRQChr15g0464041  
Probable light harvesting complex  
photosystem II

Parents WW  
Parents WD  
Hybrids WW  
Hybrids WD

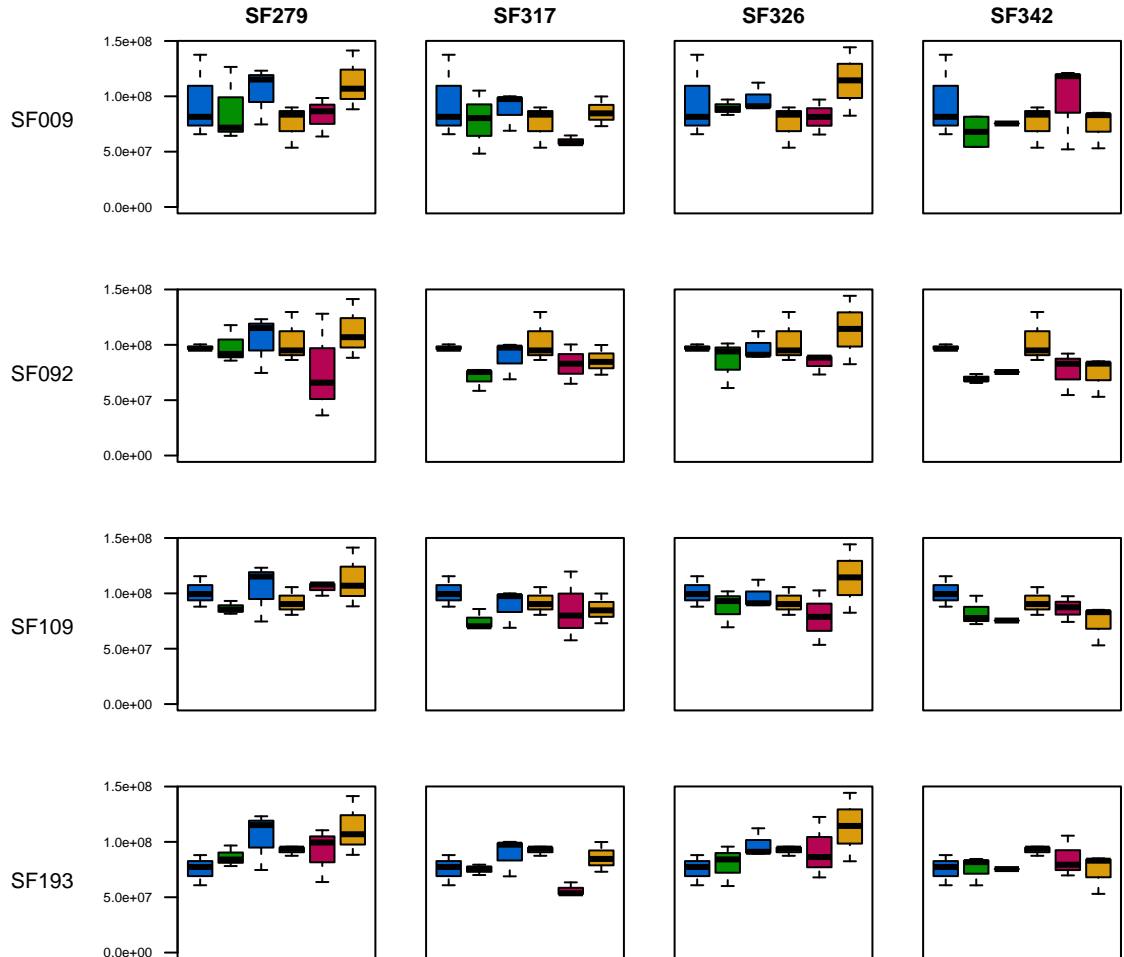

HanXRQChr05g0135531  
 Uncharacterized protein, conserved in  
 plant genome(s), supported by expression c

Parents WW  
 Parents WD  
 Hybrids WW  
 Hybrids WD

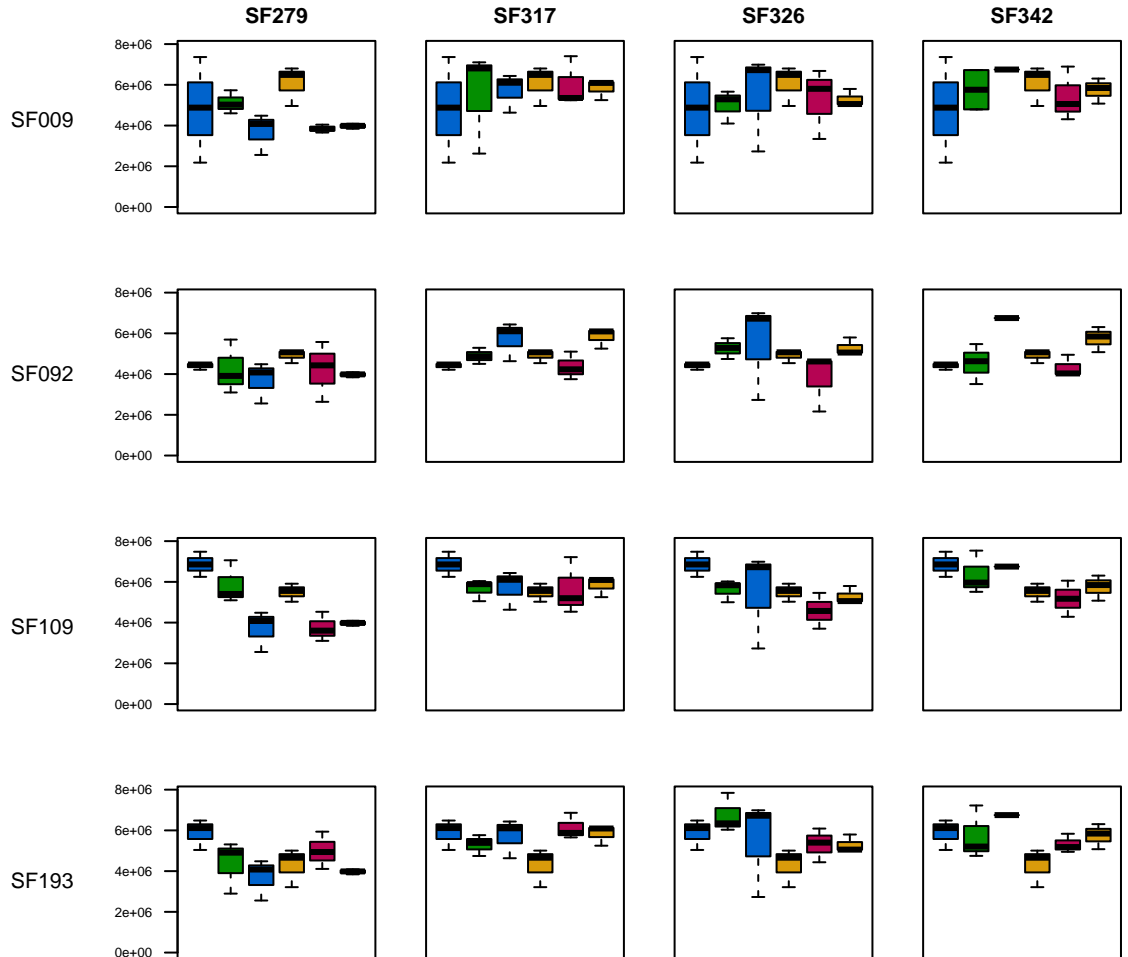



HanXRQChr14g0453101  
Probable  
5-methyltetrahydropteroyltriglutamate--hoi

Parents WW  
Parents WD  
Hybrids WW  
Hybrids WD

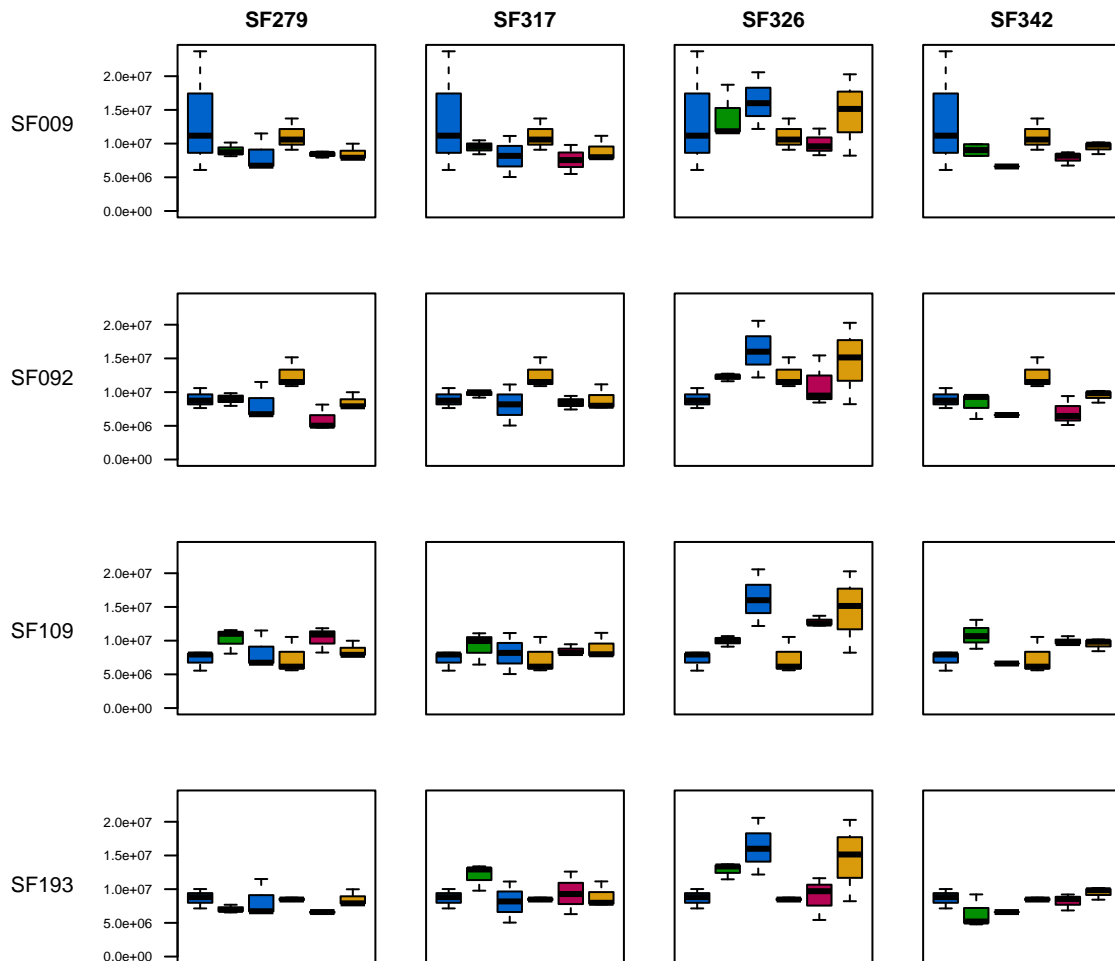

HanXRQChr10g0306381  
 Probable threonyl-tRNA synthetase,  
 putative / threonine--tRNA ligase, putative

Parents WW  
 Parents WD  
 Hybrids WW  
 Hybrids WD

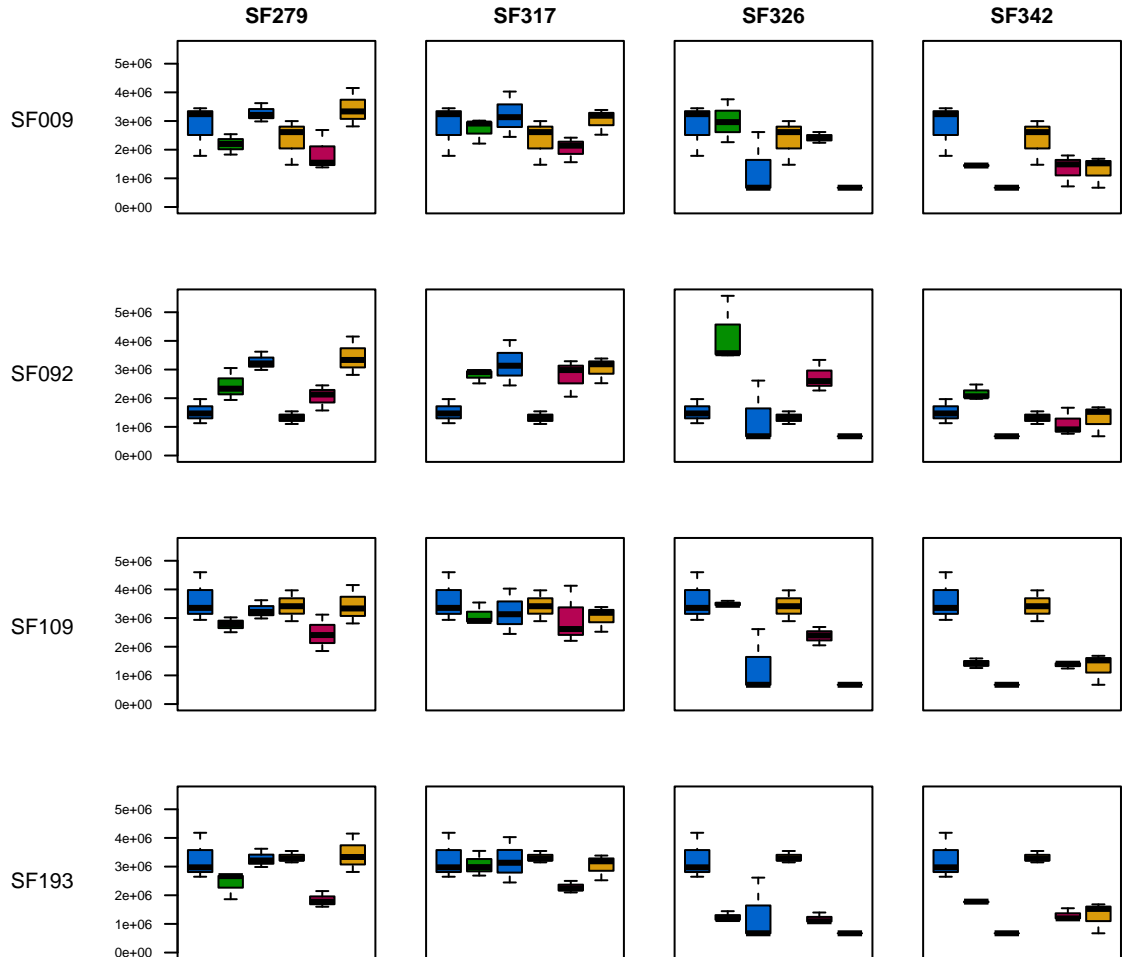

HanXRQChr05g0157561  
Probable uridylyltransferase-related

Parents WW  
Parents WD  
Hybrids WW  
Hybrids WD

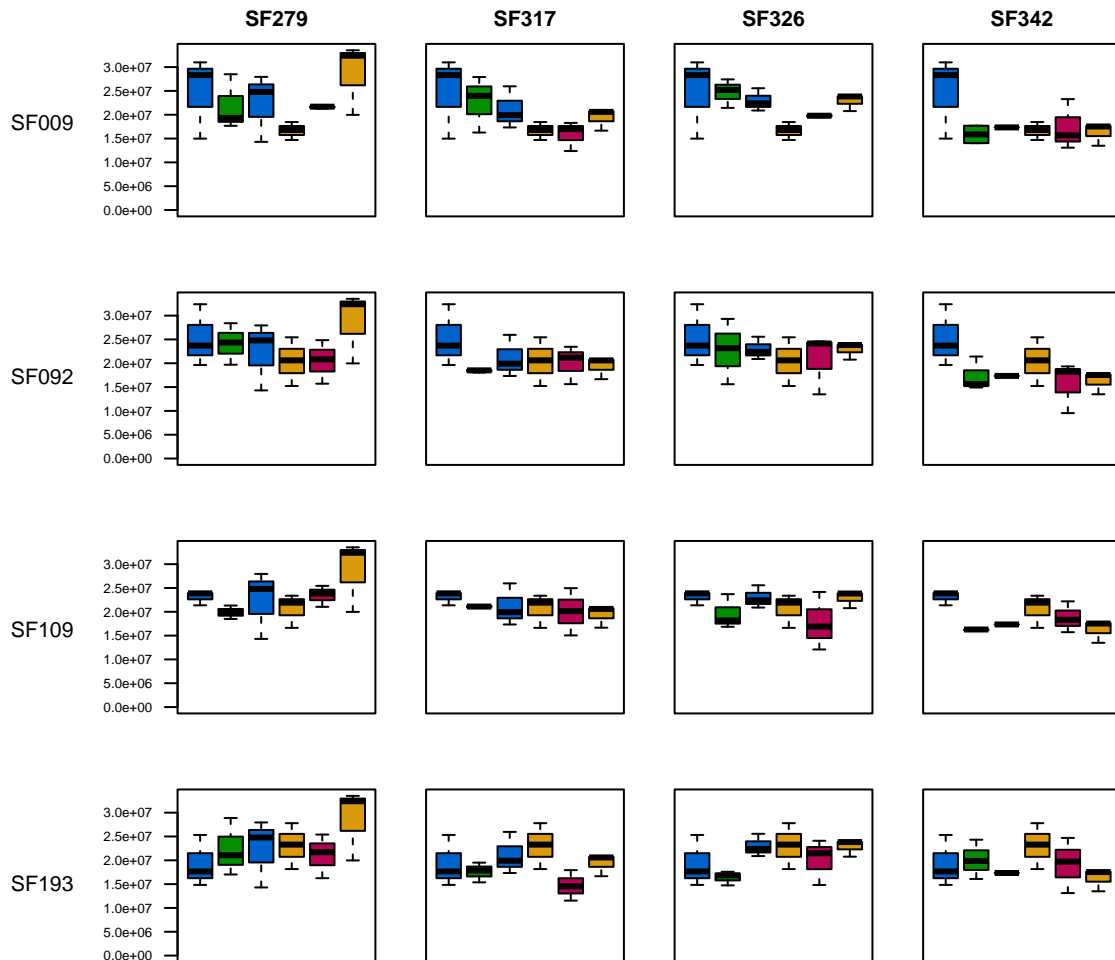

HanXRQChr12g0372951  
 Probable major pollen allergen Cor a 1  
 isoforms 5, 6, 11 and 16

Parents WW  
 Parents WD  
 Hybrids WW  
 Hybrids WD

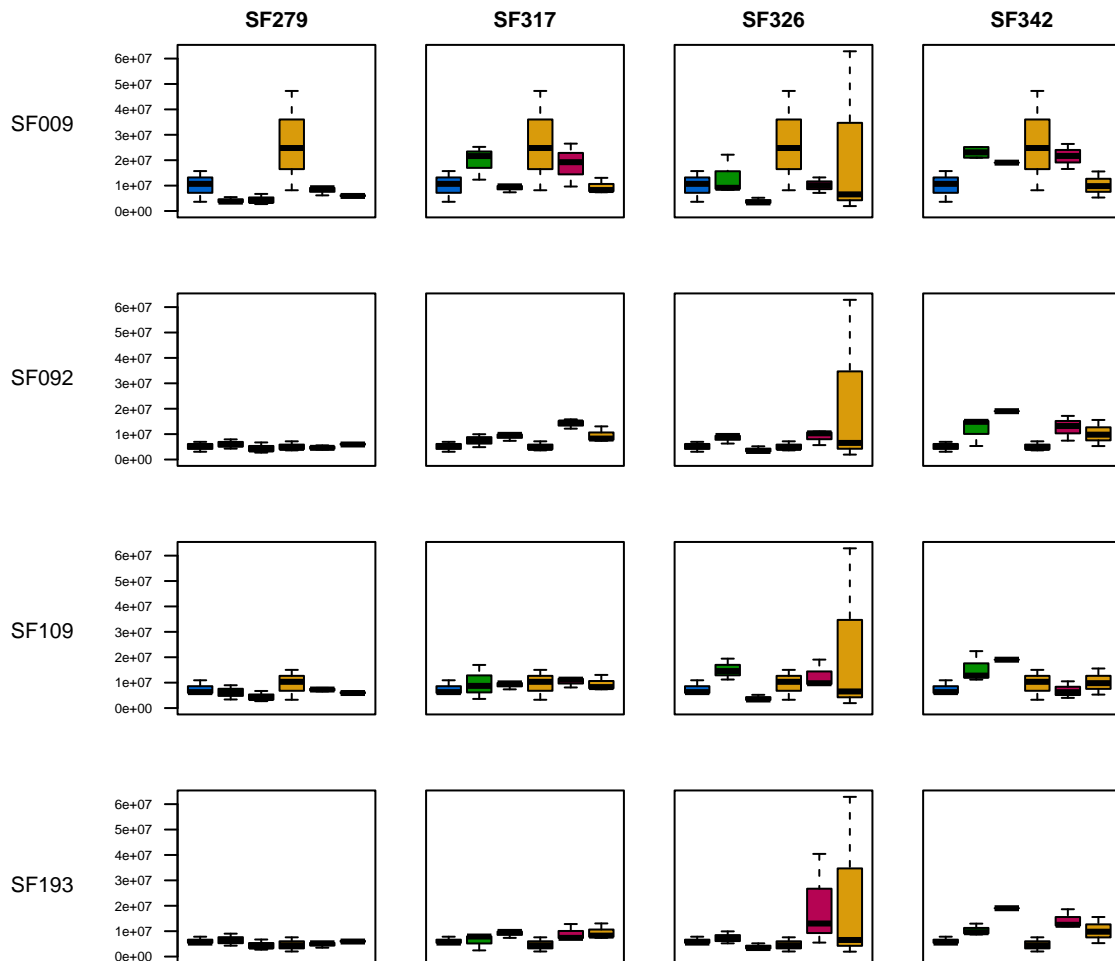

HanXRQChr02g0049591  
Probable pentapeptide repeat-containing  
protein

Parents WW  
Parents WD  
Hybrids WW  
Hybrids WD

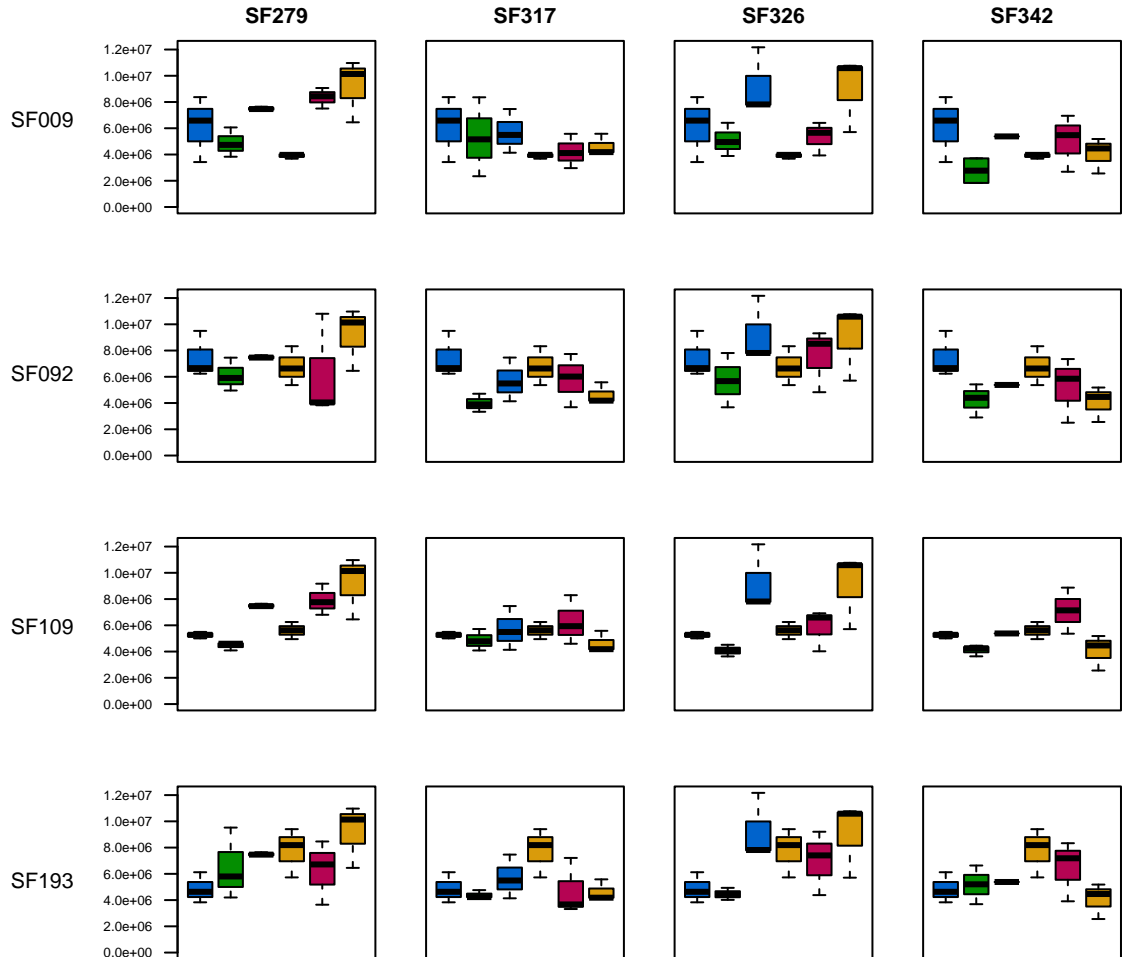

HanXRQChr13g0418501  
Putative trigger factor,  
ribosome-binding, bacterial

Parents WW  
Parents WD  
Hybrids WW  
Hybrids WD

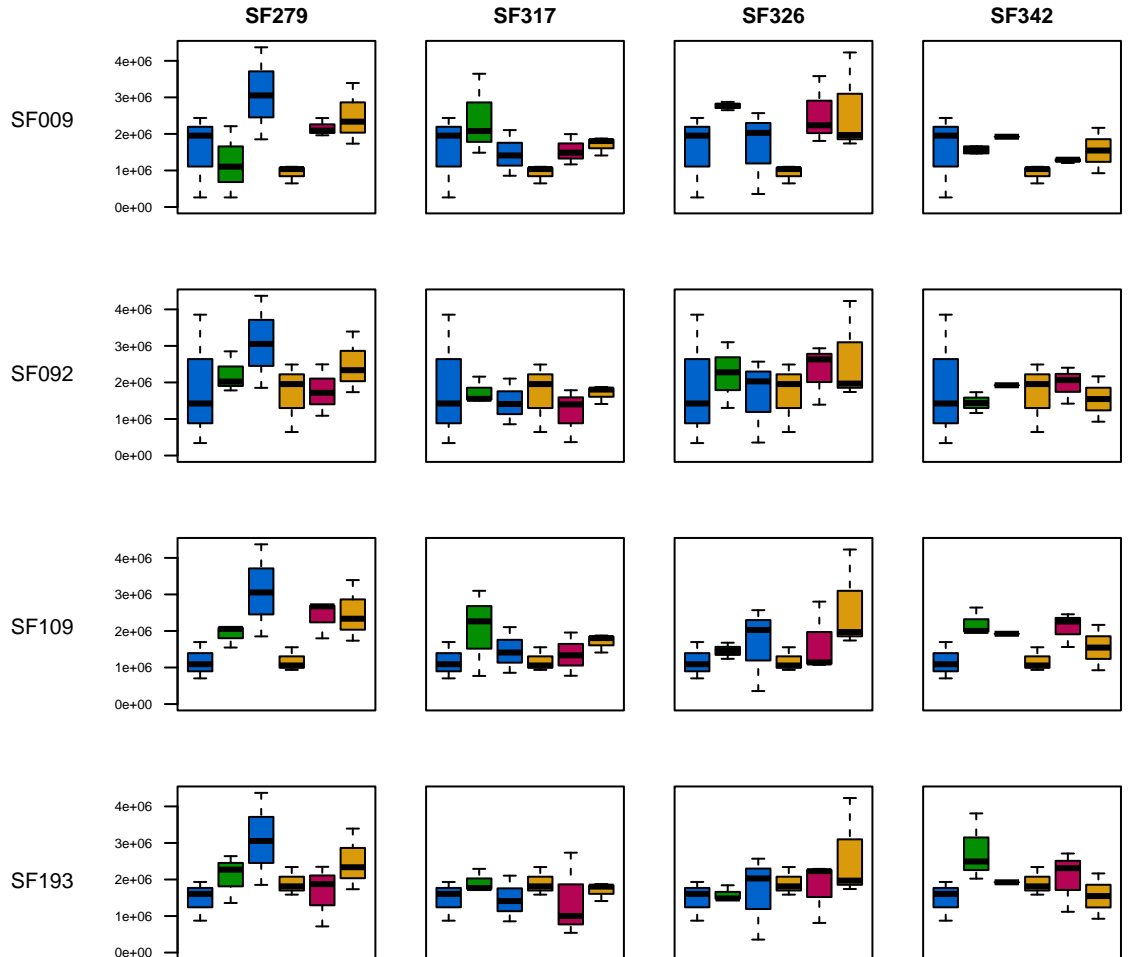

HanXRQChr10g0283991  
Probable mitochondrial import inner  
membrane translocase subunit Tim17/Tim2

Parents WW  
Parents WD  
Hybrids WW  
Hybrids WD

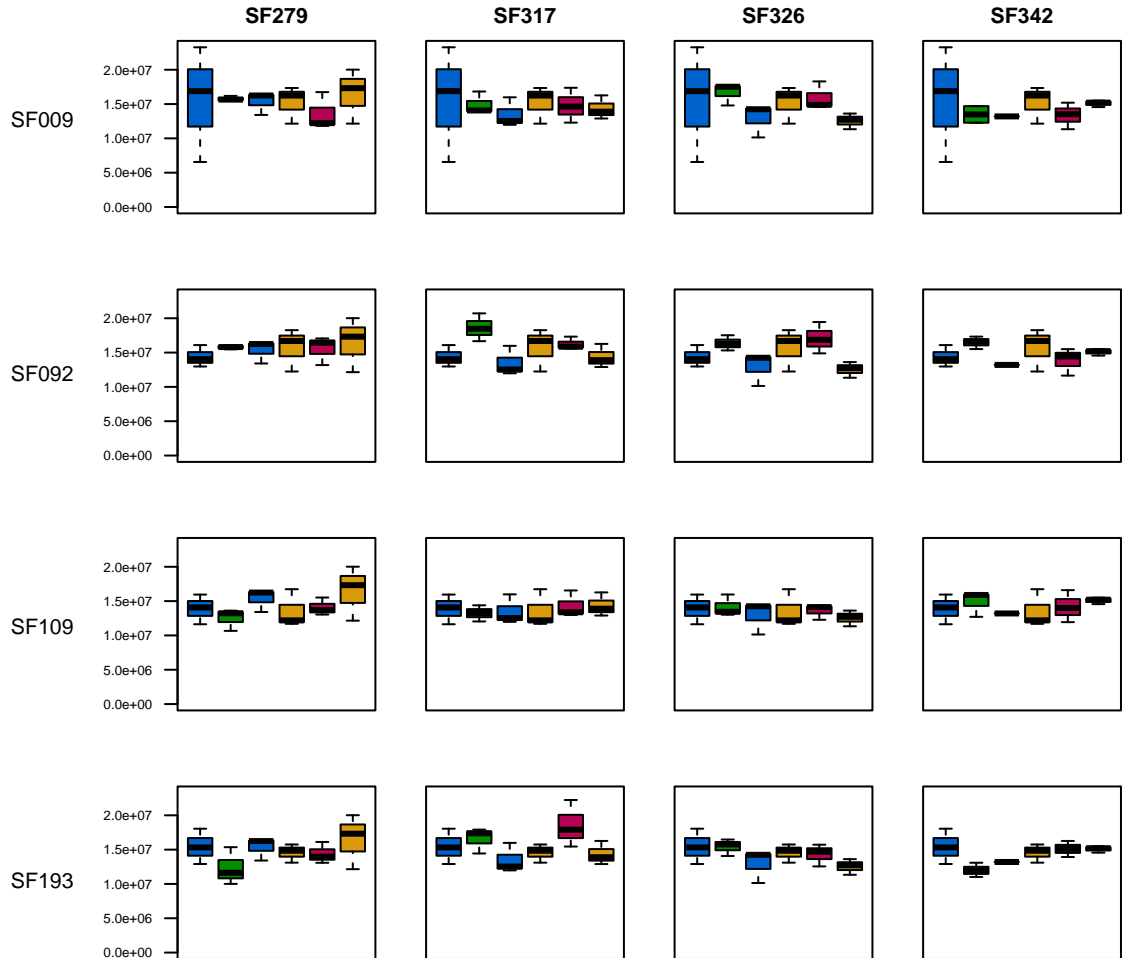

HanXRQChr09g0268611  
Probable glucose-6-phosphate isomerase,  
cytosolic 1

Parents WW  
Parents WD  
Hybrids WW  
Hybrids WD

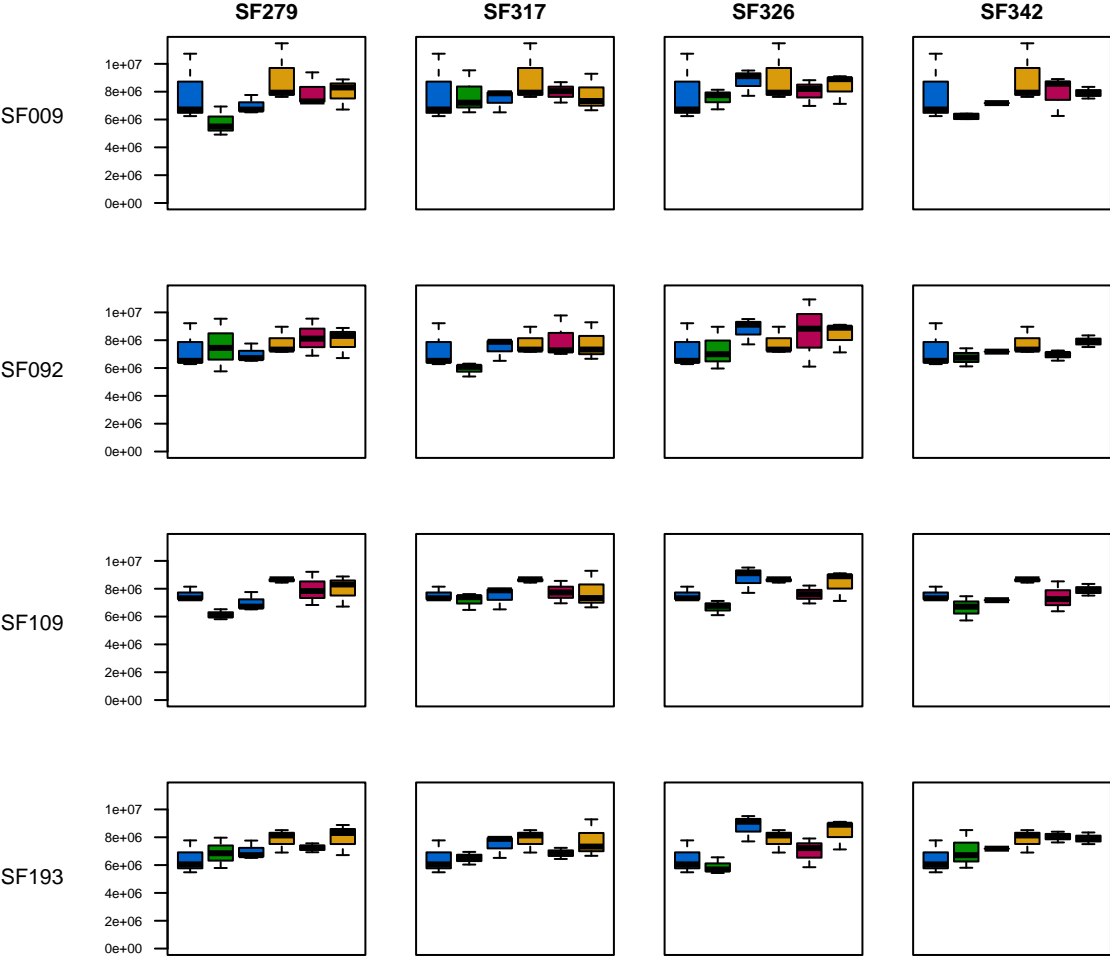



HanXRQChr02g0043601  
Putative malate dehydrogenase, active  
site; L-lactate/malate dehydrogenase

Parents WW  
Parents WD  
Hybrids WW  
Hybrids WD

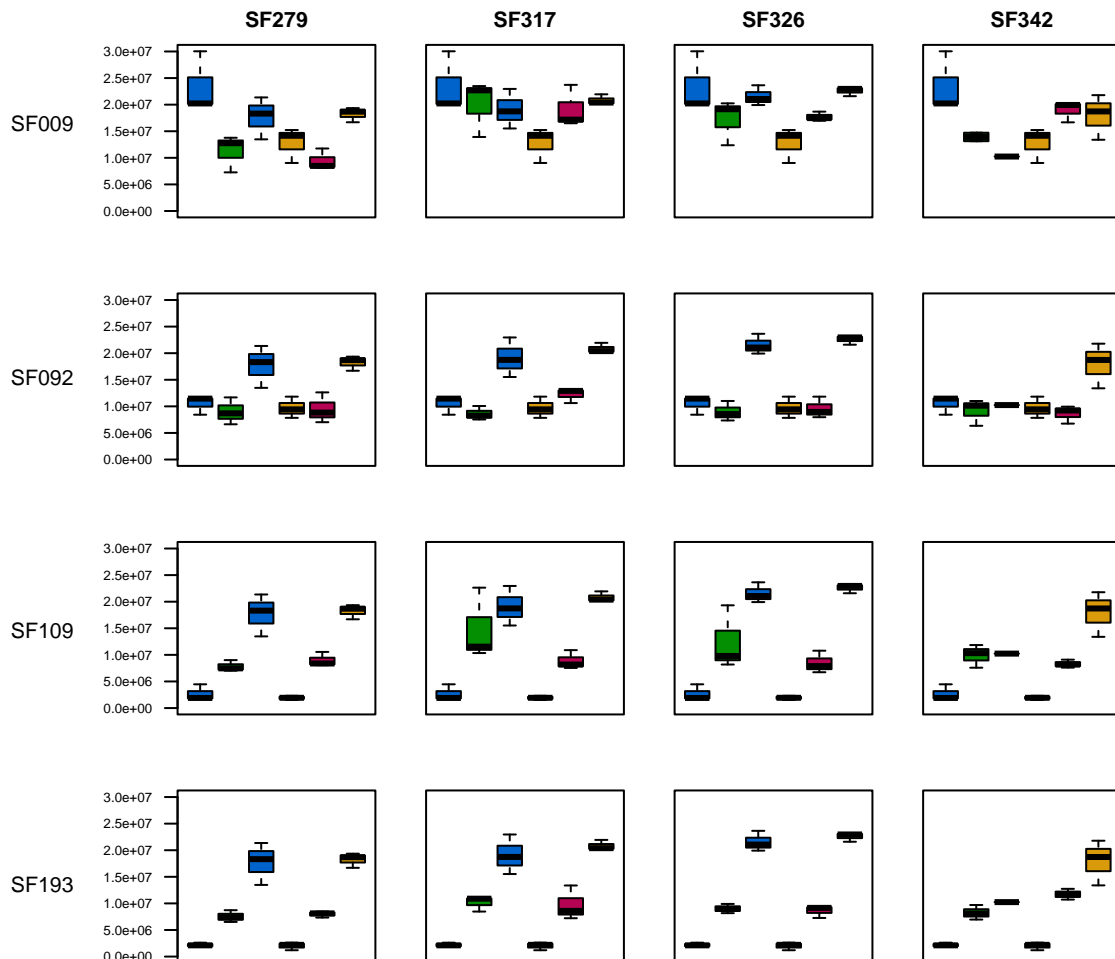

HanXRQChr05g0136281  
Putative ribosomal protein L7/L12,  
oligomerisation

Parents WW  
Parents WD  
Hybrids WW  
Hybrids WD

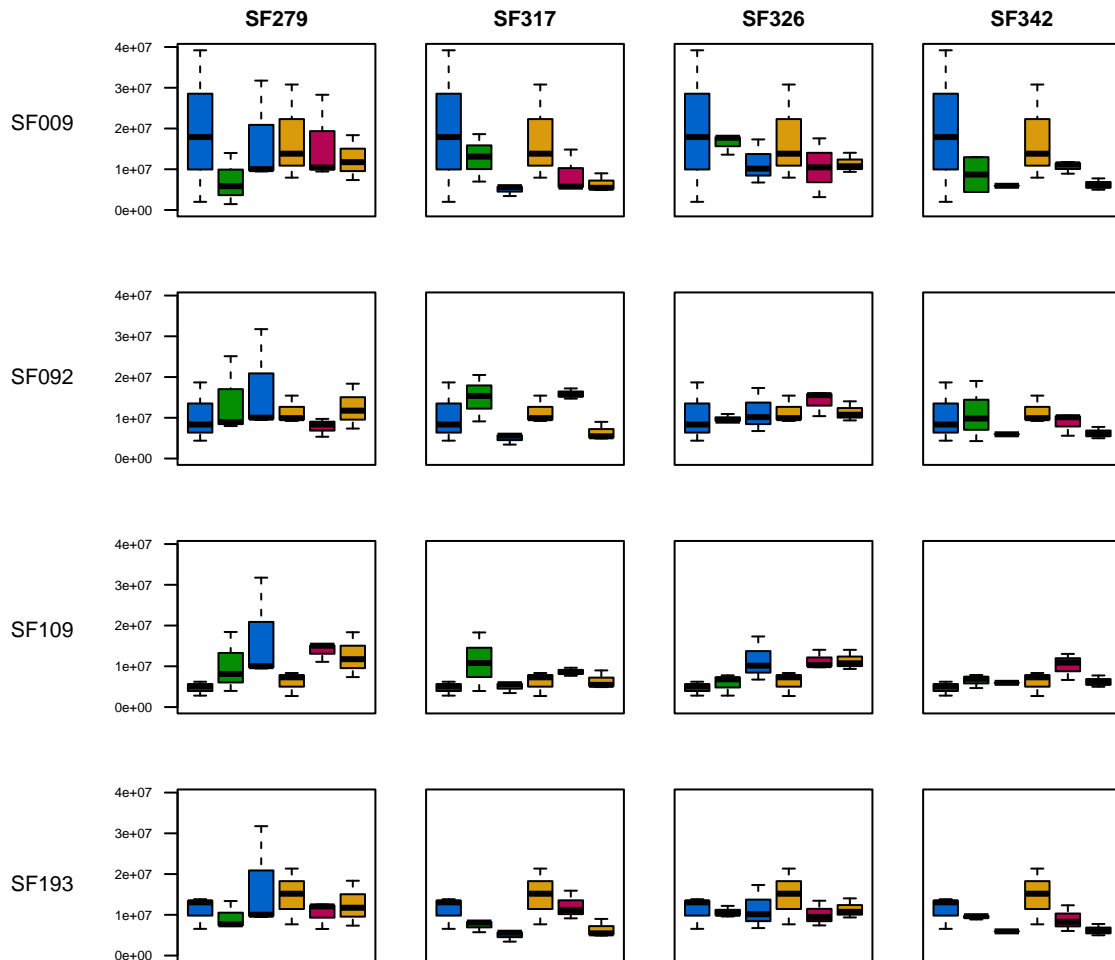

HanXRQChr14g0460121  
Probable superoxide dismutase [Mn],  
mitochondrial

Parents WW  
Parents WD  
Hybrids WW  
Hybrids WD

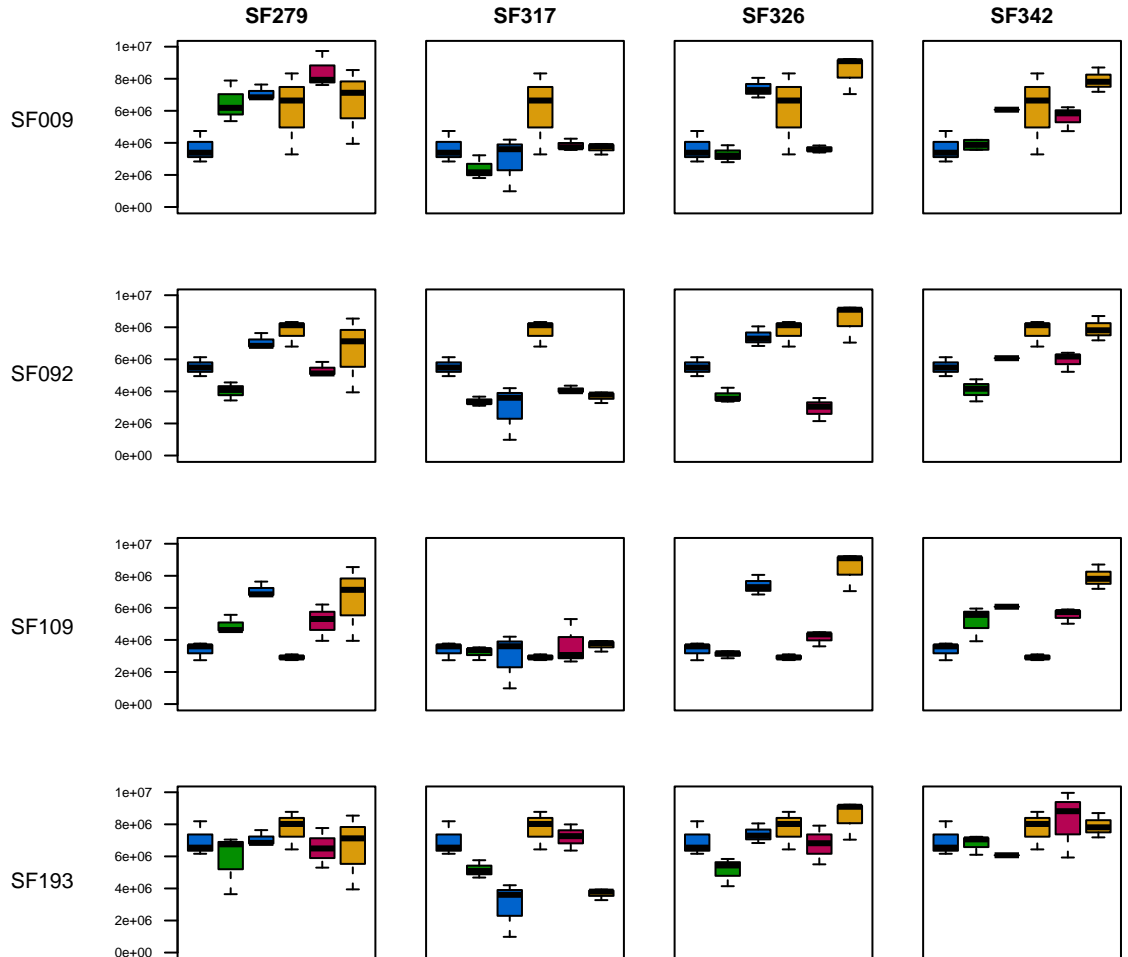

HanXRQChr12g0364941  
Probable semialdehyde dehydrogenase  
family protein

Parents WW  
Parents WD  
Hybrids WW  
Hybrids WD

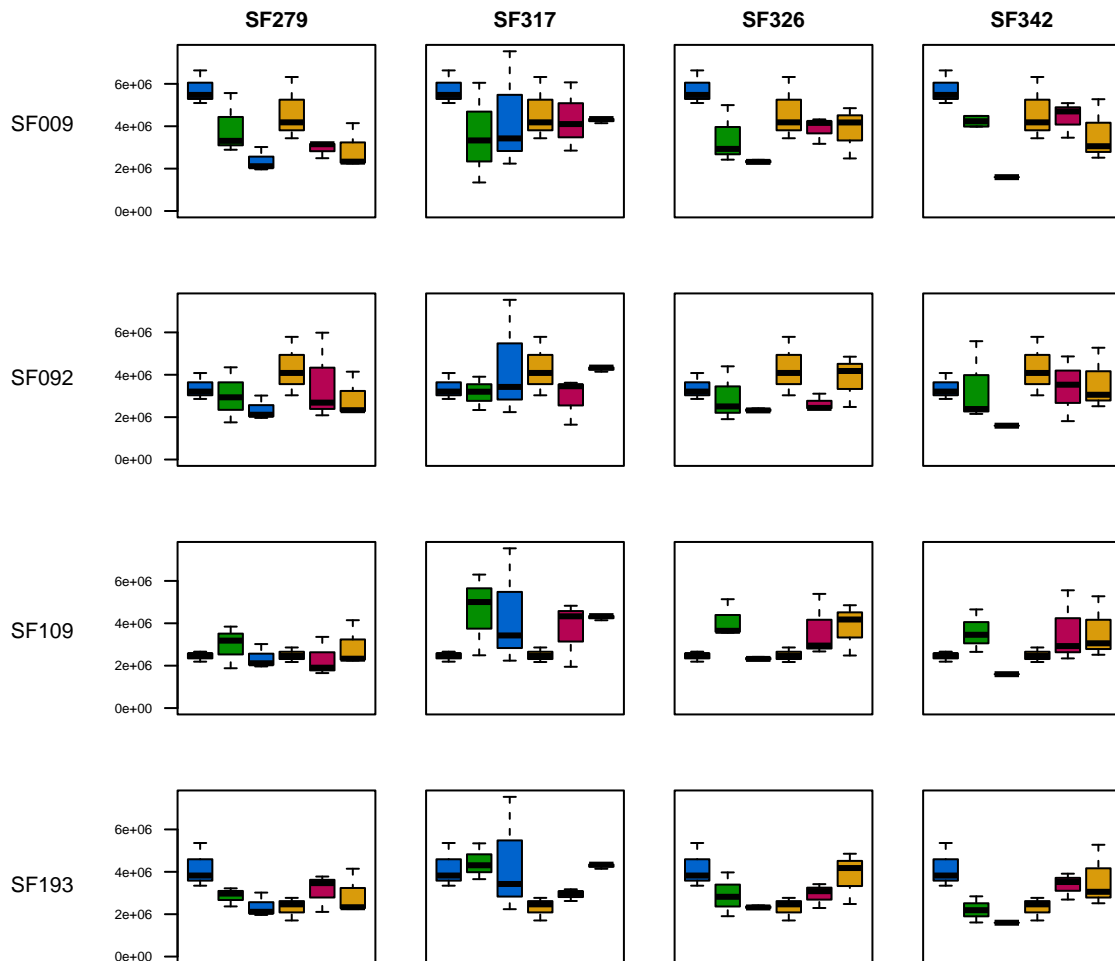

HanXRQCPg0580331  
Putative ribosomal protein S15;  
NADH:ubiquinone oxidoreductase, subunit

Parents WW  
Parents WD  
Hybrids WW  
Hybrids WD

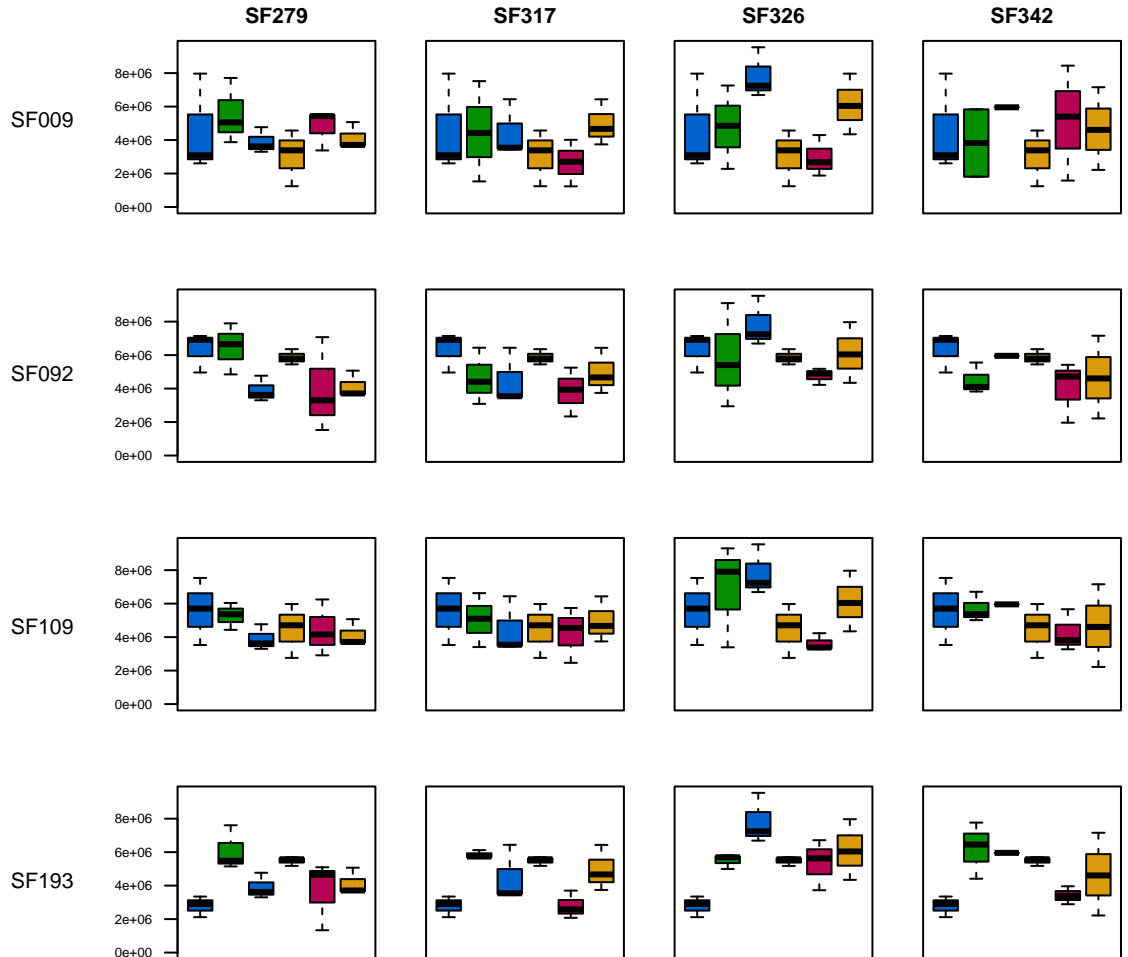

HanXRQChr02g0051721  
 Probable S-adenosylmethionine synthase :

Parents WW  
 Parents WD  
 Hybrids WW  
 Hybrids WD

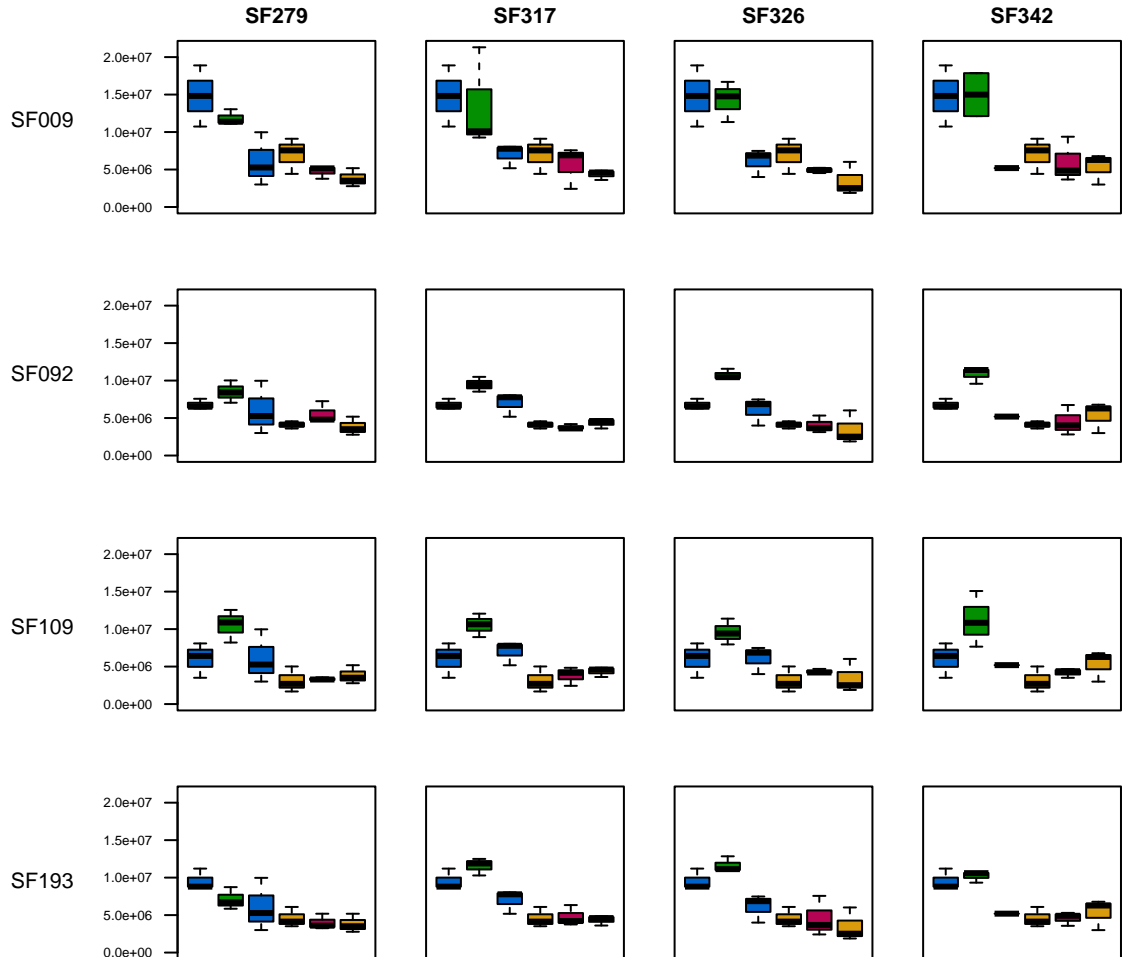

HanXRQChr08g0210781  
Putative endosulphine

Parents WW  
Parents WD  
Hybrids WW  
Hybrids WD

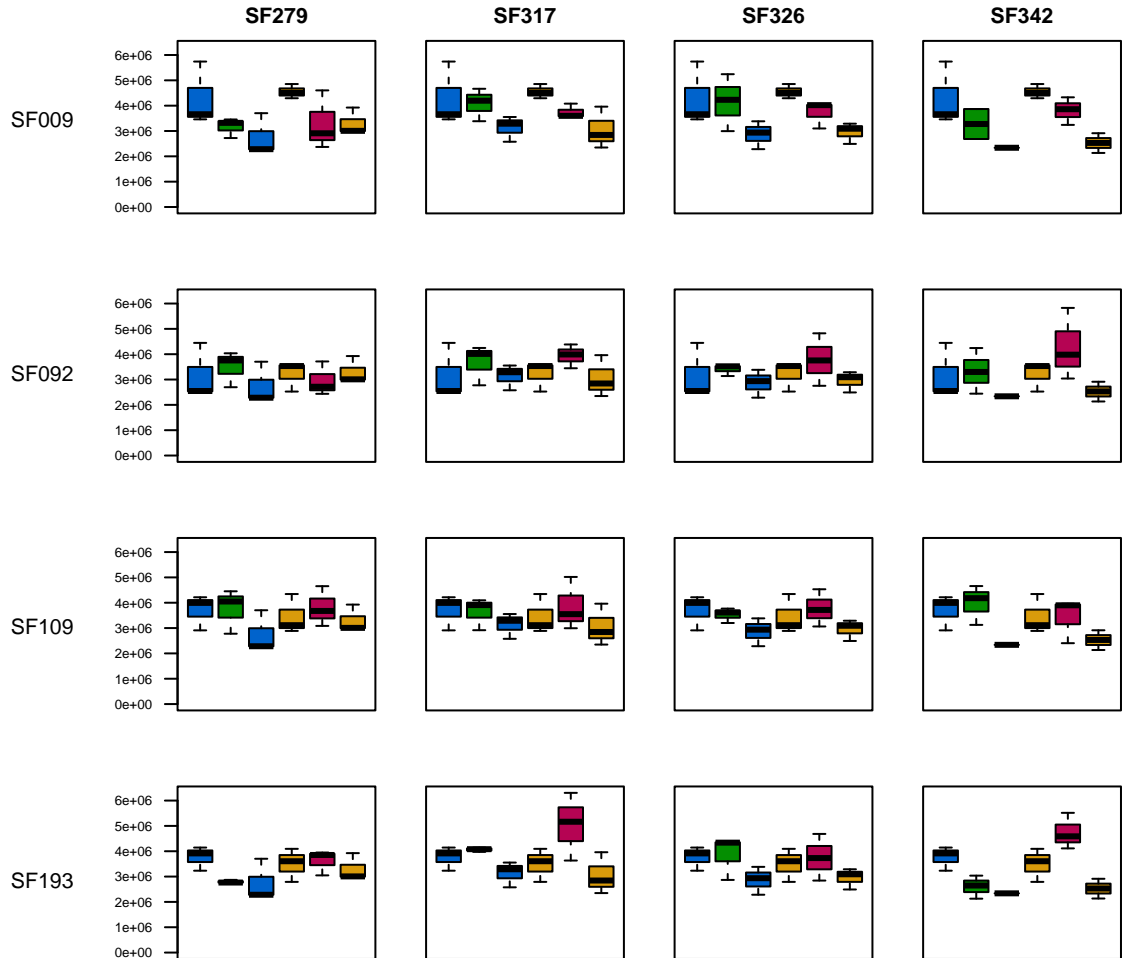

HanXRQChr01g0014641  
 Uncharacterized protein, conserved in  
 plant genome(s), supported by expression c

Parents WW  
 Parents WD  
 Hybrids WW  
 Hybrids WD

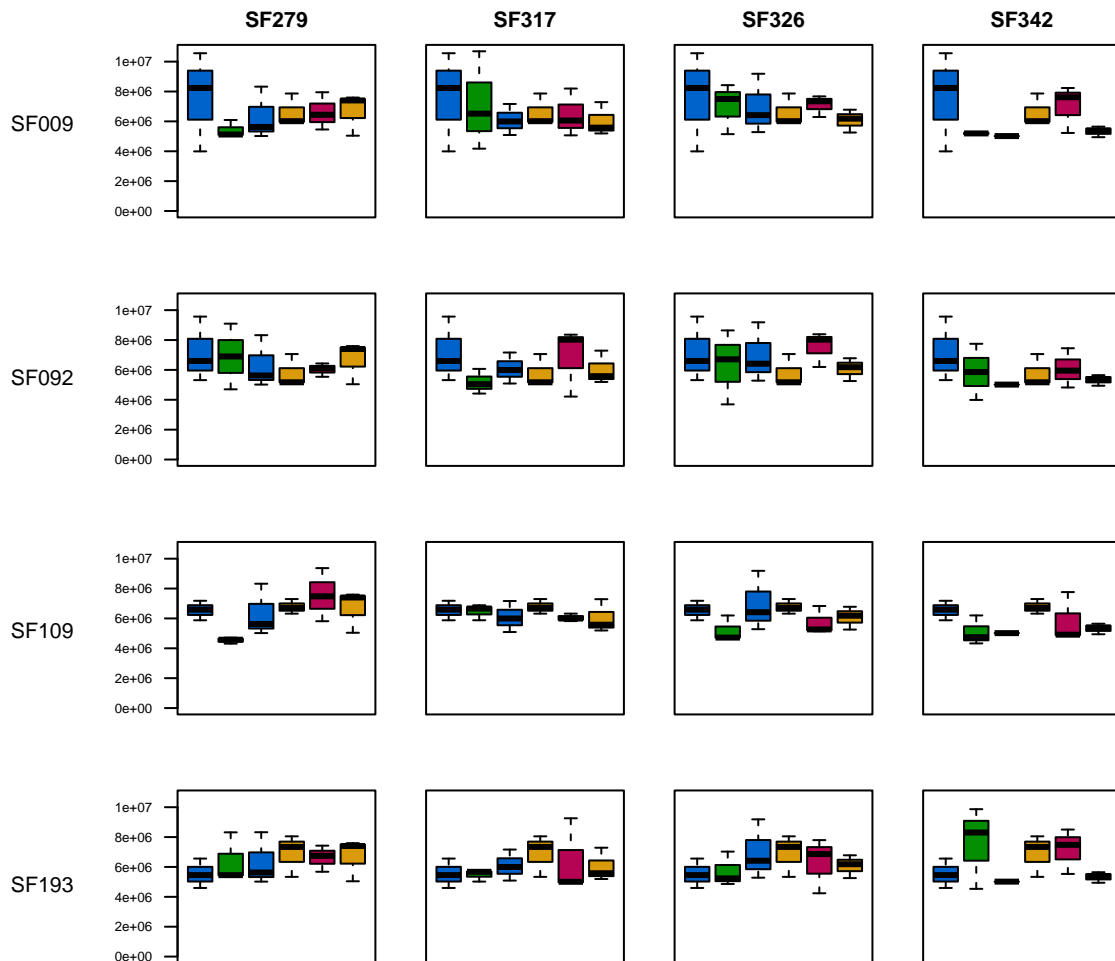



HanXRQChr09g0261451  
Putative succinate dehydrogenase,  
flavoprotein subunit; Adenylylsulphate reductase

Parents WW  
Parents WD  
Hybrids WW  
Hybrids WD

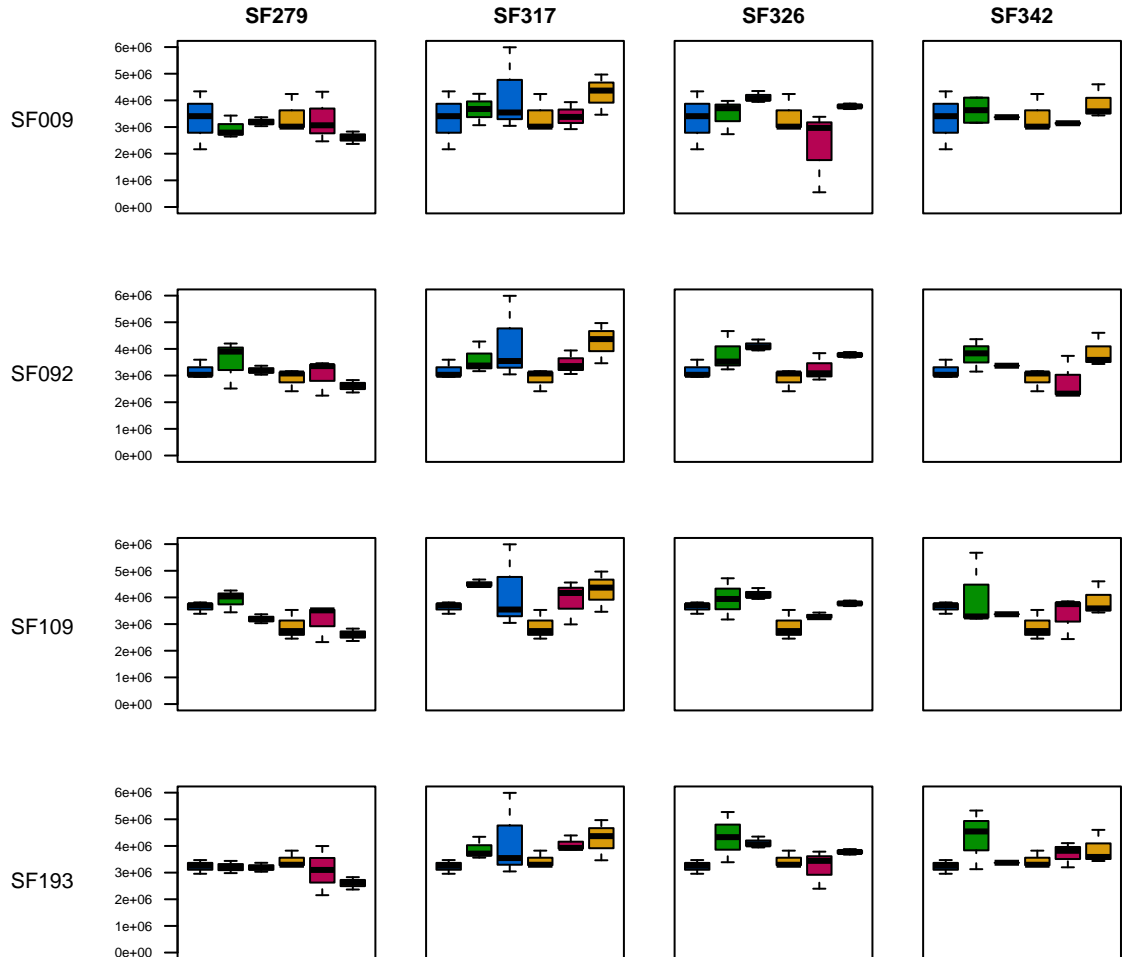

HanXRQChr08g0227631  
 Probable nine-cis-epoxycarotenoid  
 dioxygenase 4

Parents WW  
 Parents WD  
 Hybrids WW  
 Hybrids WD

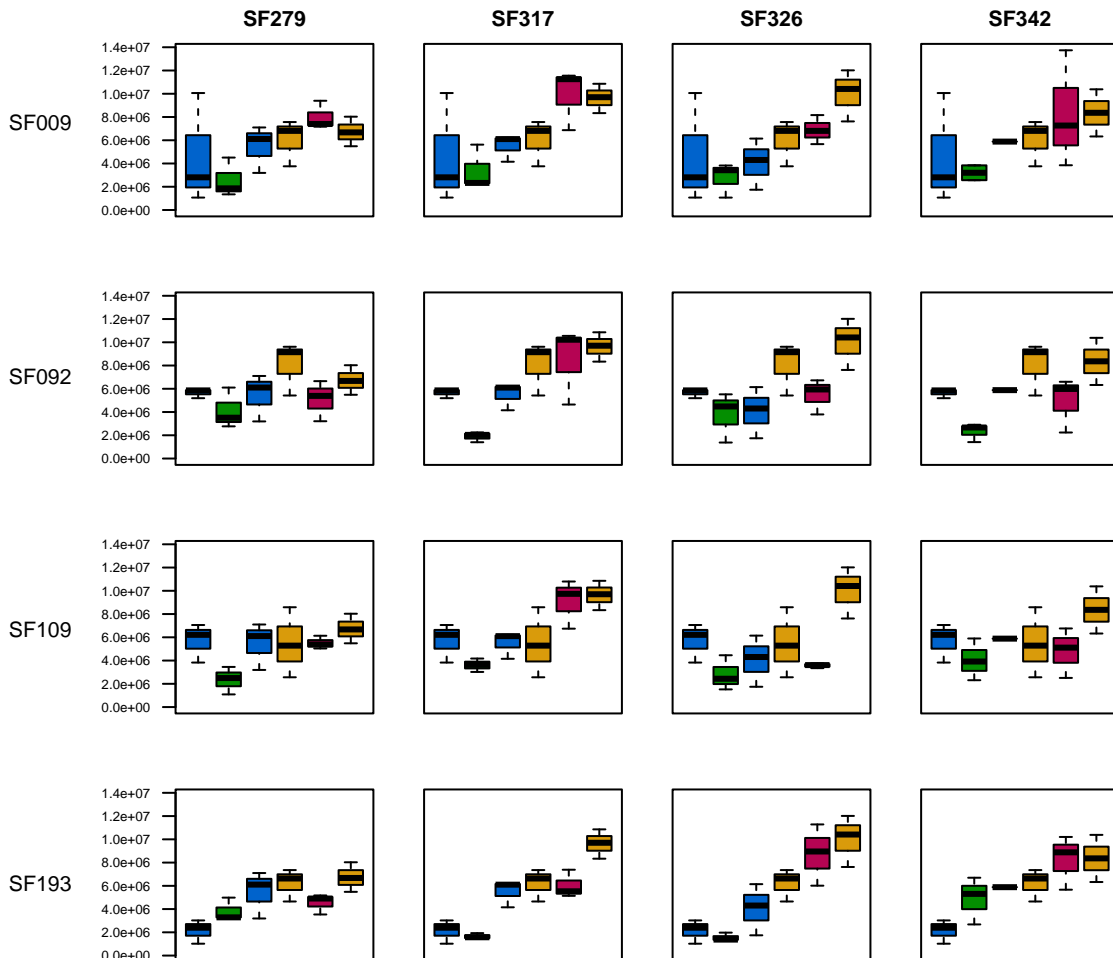

HanXRQChr15g0468101  
Probable photosystem I reaction center  
subunit IV A, chloroplastic

Parents WW  
Parents WD  
Hybrids WW  
Hybrids WD

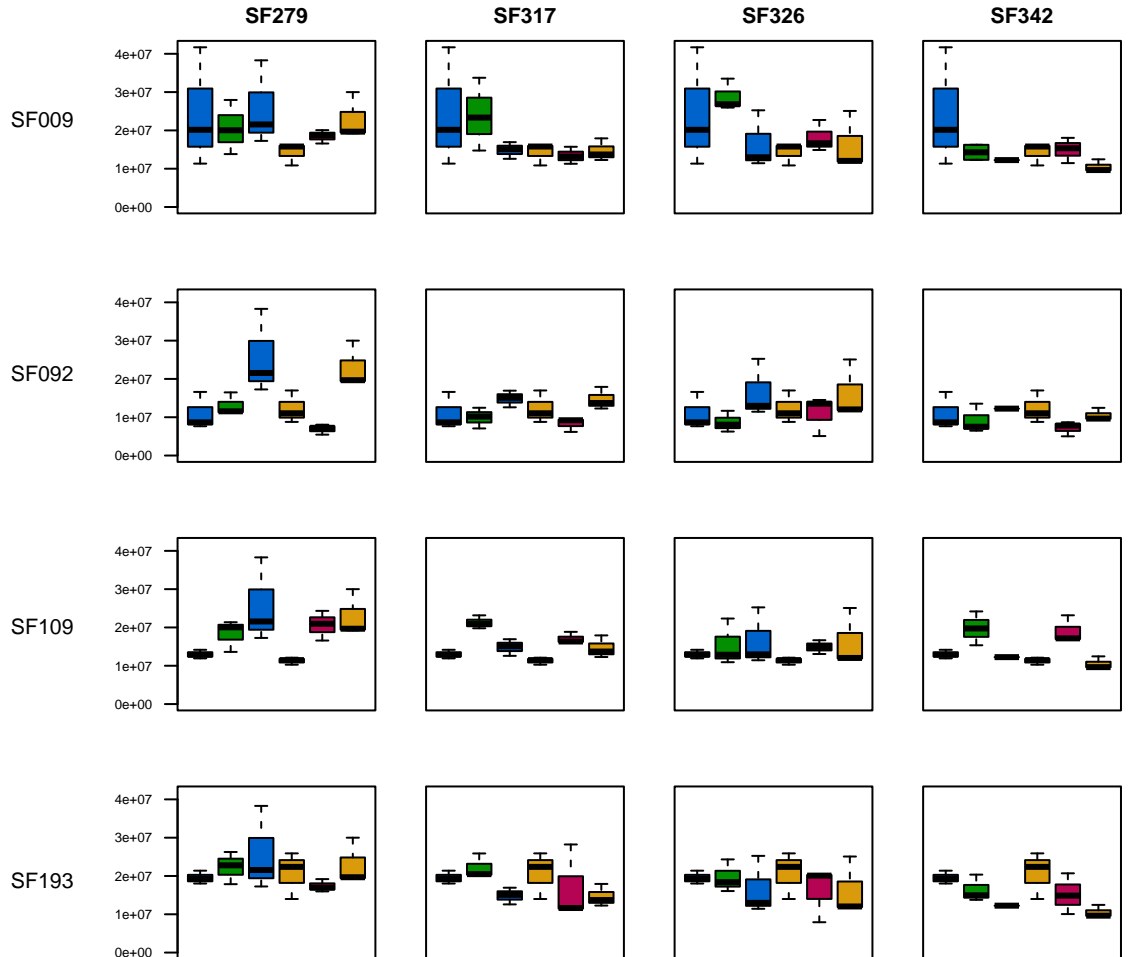

HanXRQChr01g0022151  
Probable S-adenosyl-L-homocysteine  
hydrolase

Parents WW  
Parents WD  
Hybrids WW  
Hybrids WD

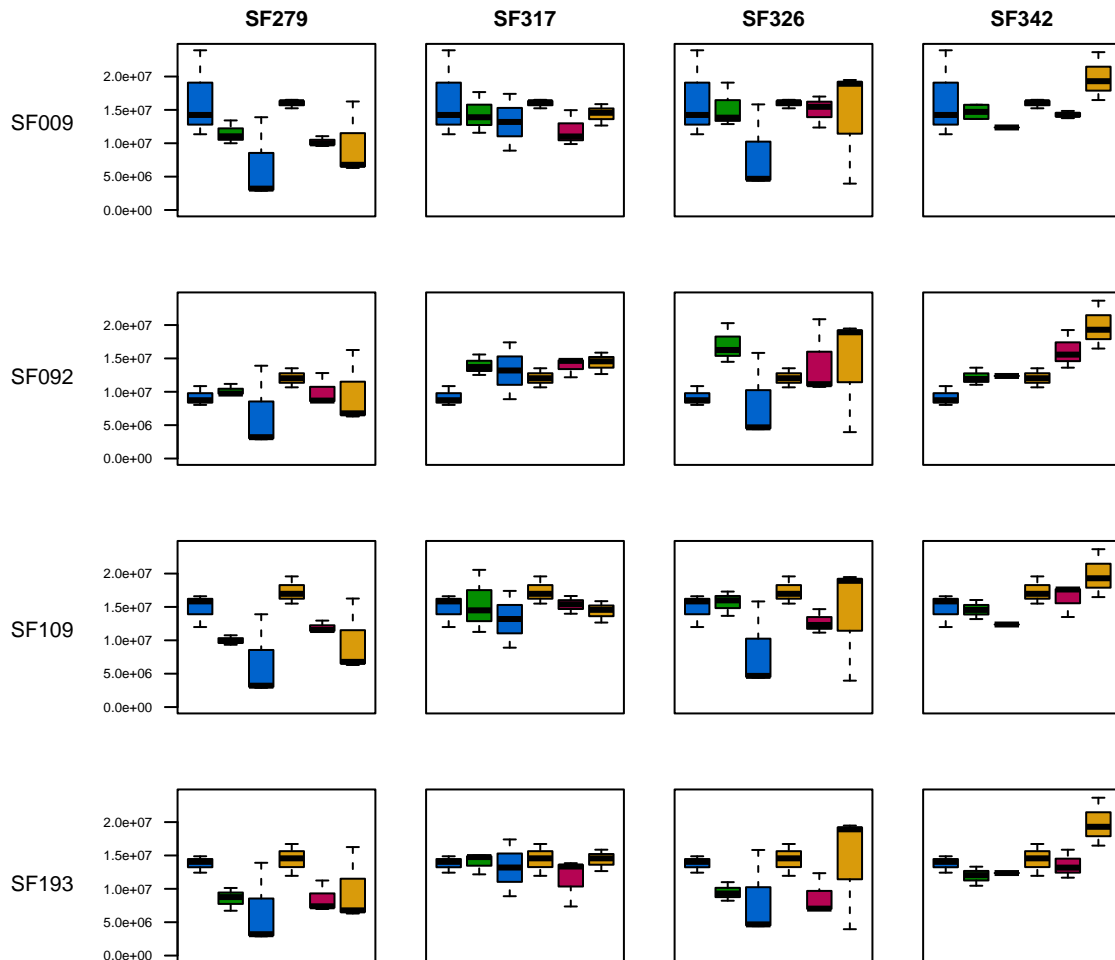

HanXRQChr17g0547881  
Probable peptidyl-prolyl cis-trans  
isomerase, chloroplastic

Parents WW  
Parents WD  
Hybrids WW  
Hybrids WD

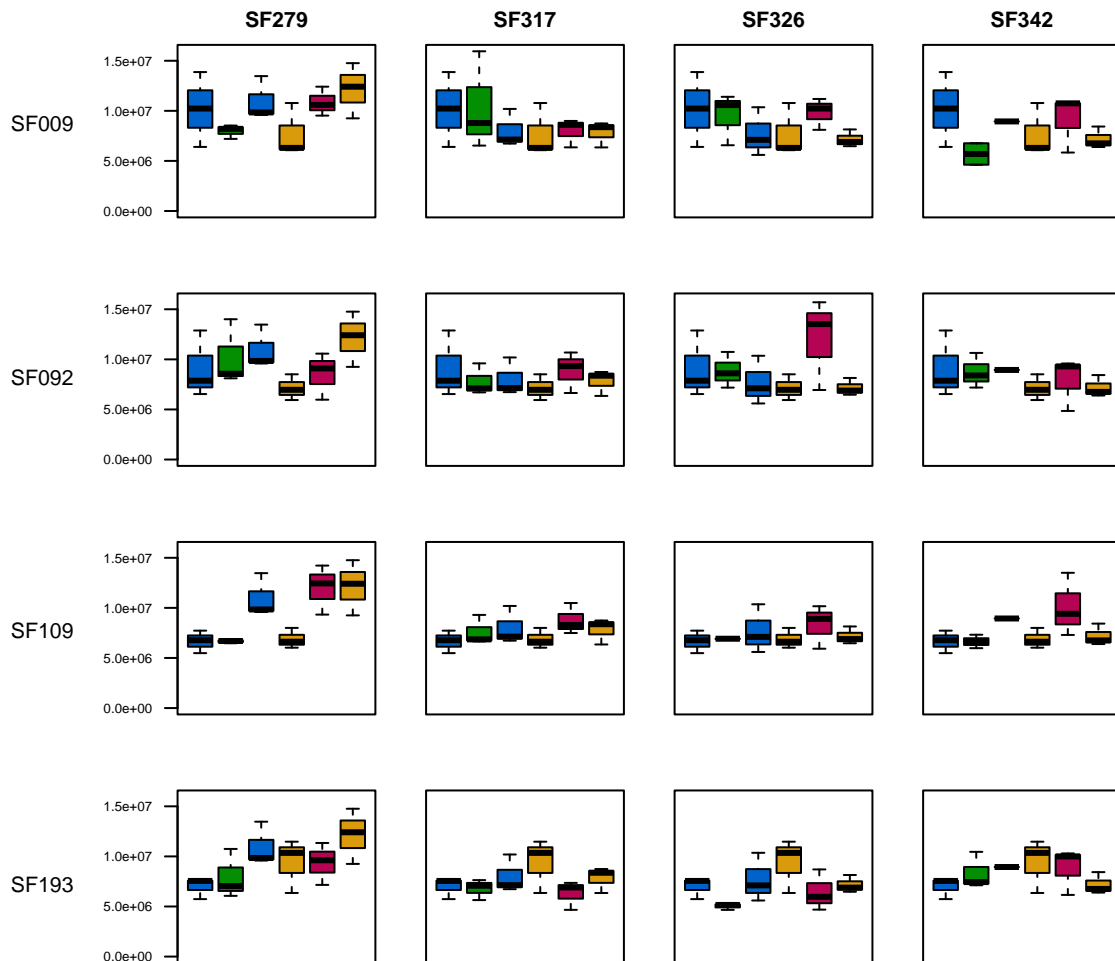

HanXRQChr10g0301661  
Putative leucine-rich repeat domain, L  
domain-like

Parents WW  
Parents WD  
Hybrids WW  
Hybrids WD

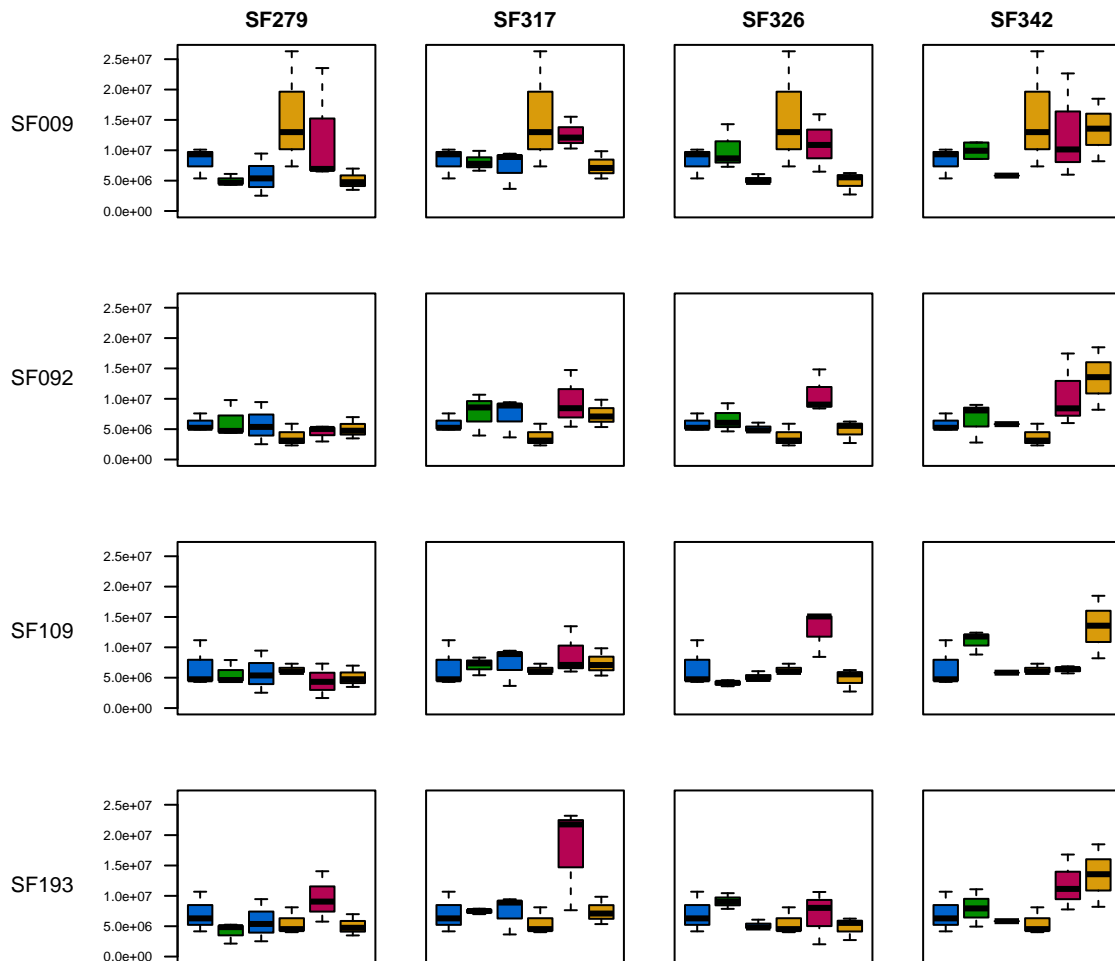

HanXRQChr17g0555601  
Probable chlorophyll a-b binding  
protein, chloroplastic

Parents WW  
Parents WD  
Hybrids WW  
Hybrids WD

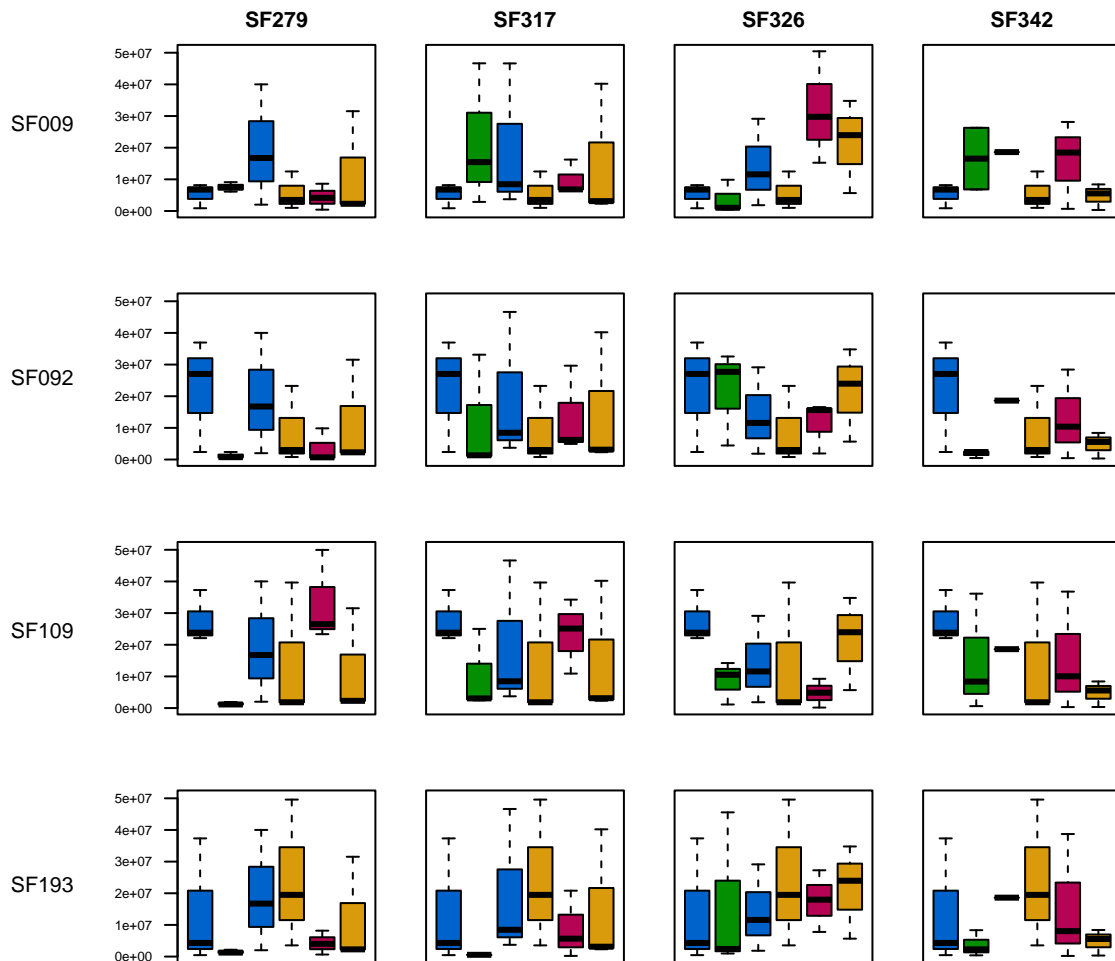

HanXRQChr02g0046381  
 Probable 6-phosphogluconate  
 dehydrogenase family protein

Parents WW  
 Parents WD  
 Hybrids WW  
 Hybrids WD

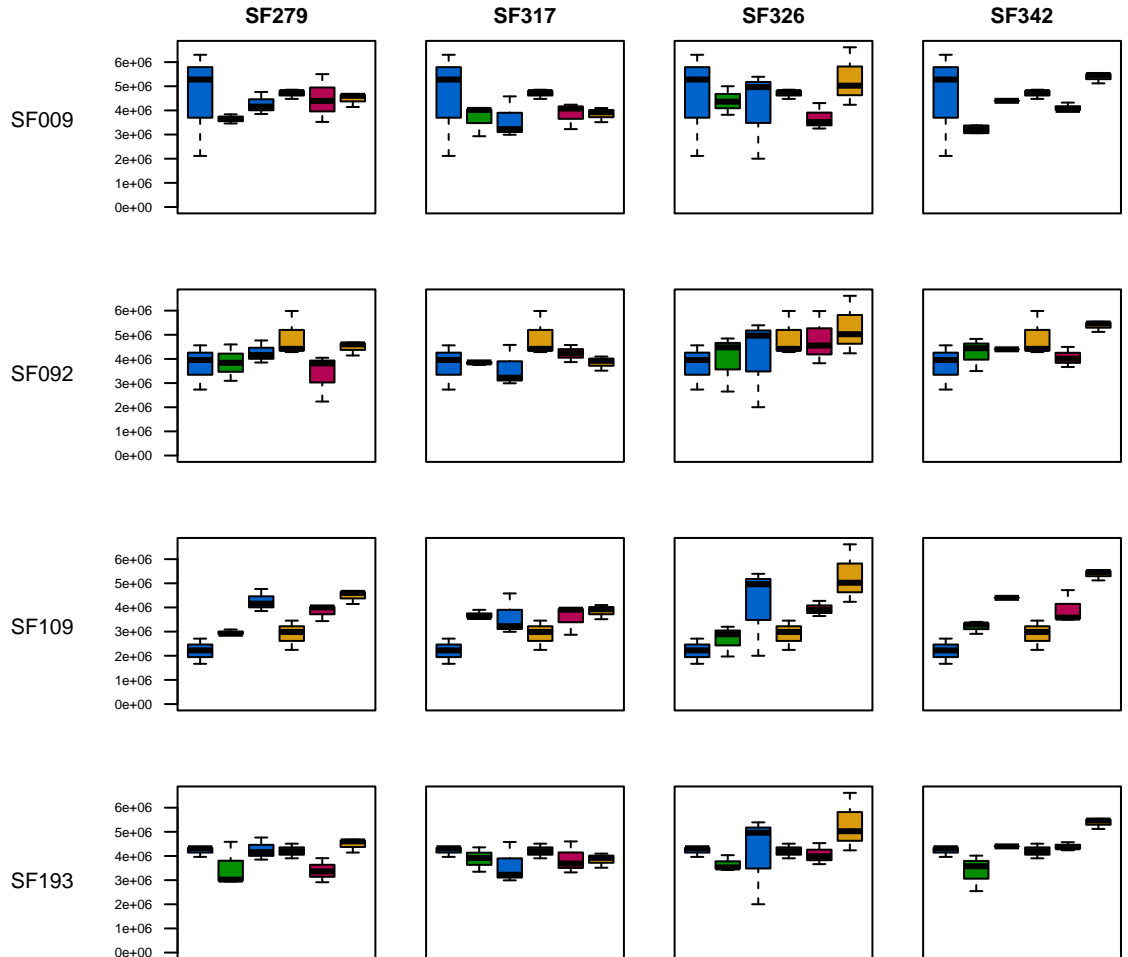



HanXRQCPg0579811  
 Putative ribosomal protein S2;  
 Ribosomal protein S2, flavodoxin-like domain

Parents WW  
 Parents WD  
 Hybrids WW  
 Hybrids WD

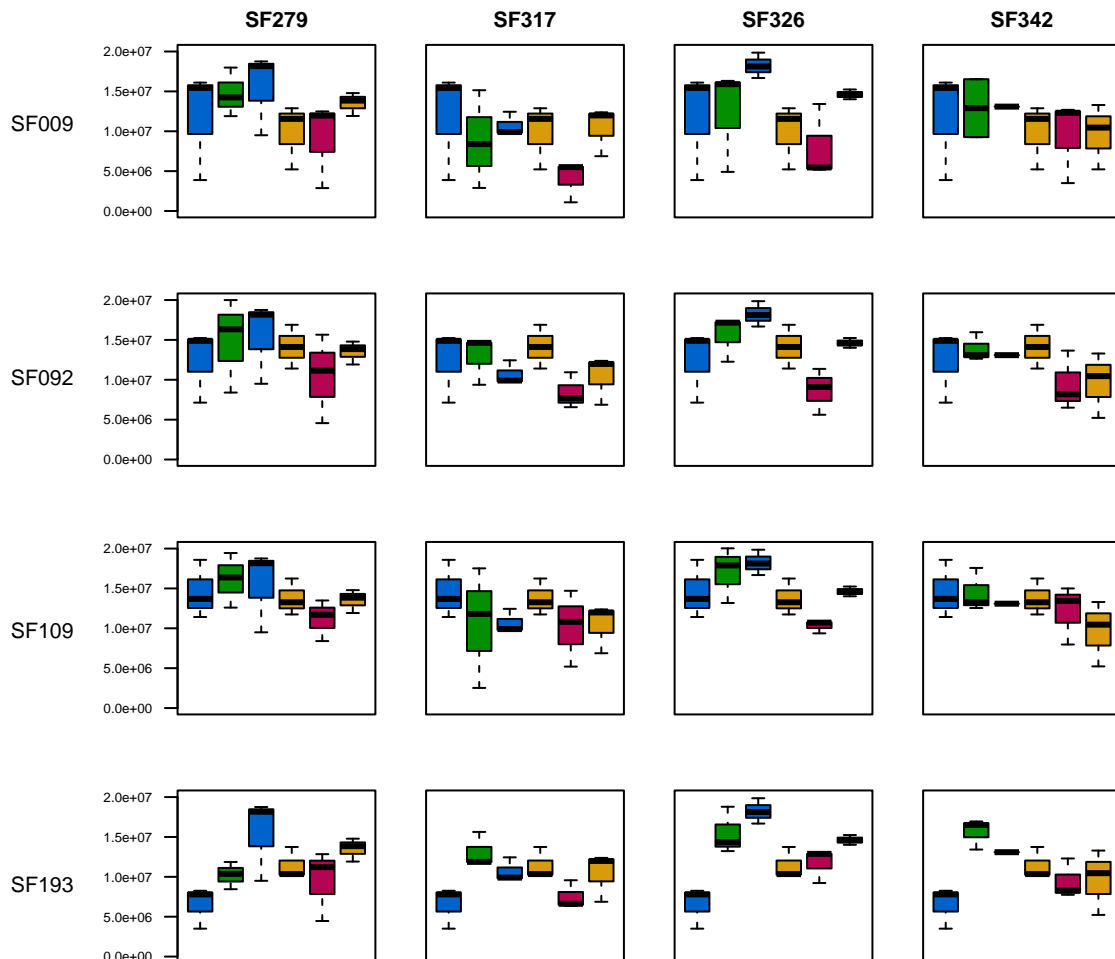

HanXRQChr09g0258731  
Probable thylakoid lumen 18.3 kDa  
protein

Parents WW  
Parents WD  
Hybrids WW  
Hybrids WD

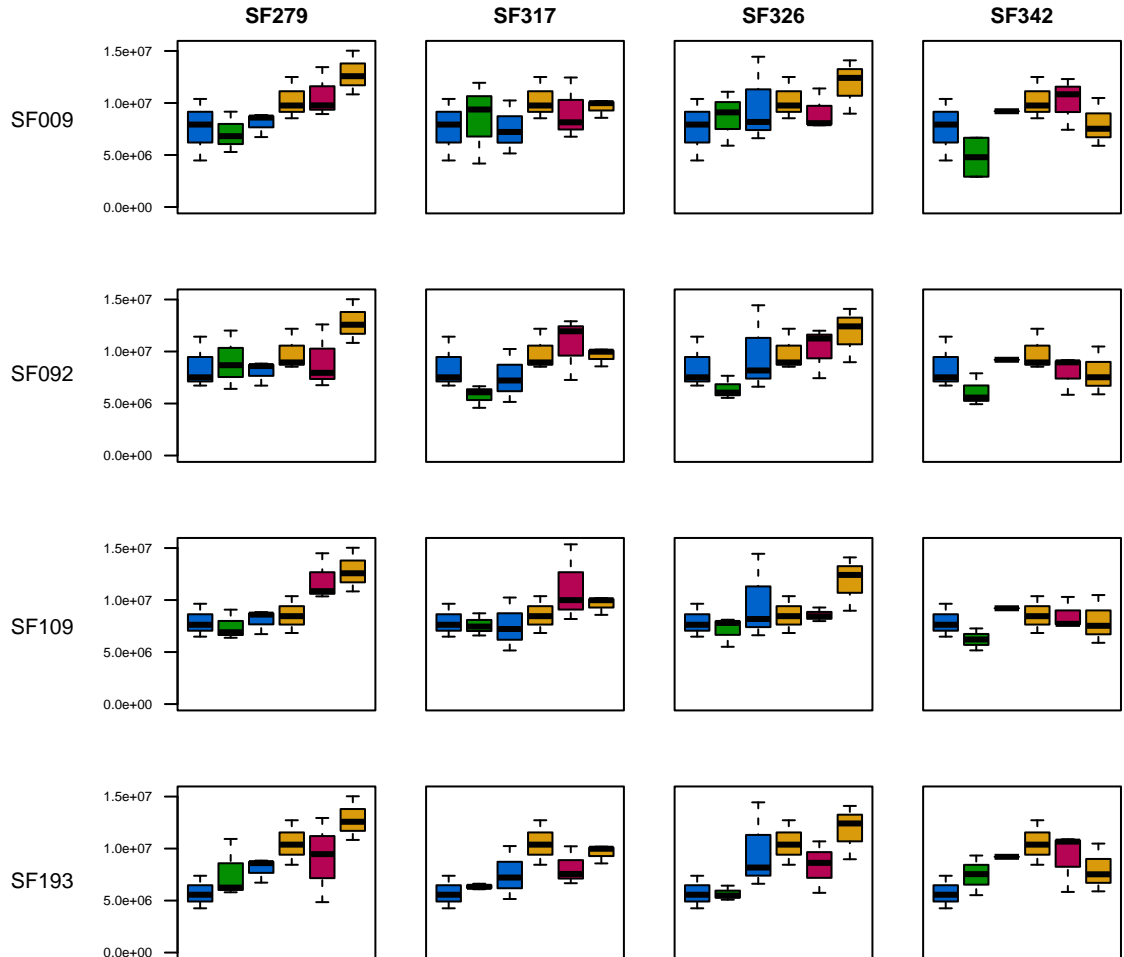

HanXRQChr02g0052341  
 Probable RNA-binding (RRM/RBD/RNP  
 motifs) family protein

Parents WW  
 Parents WD  
 Hybrids WW  
 Hybrids WD

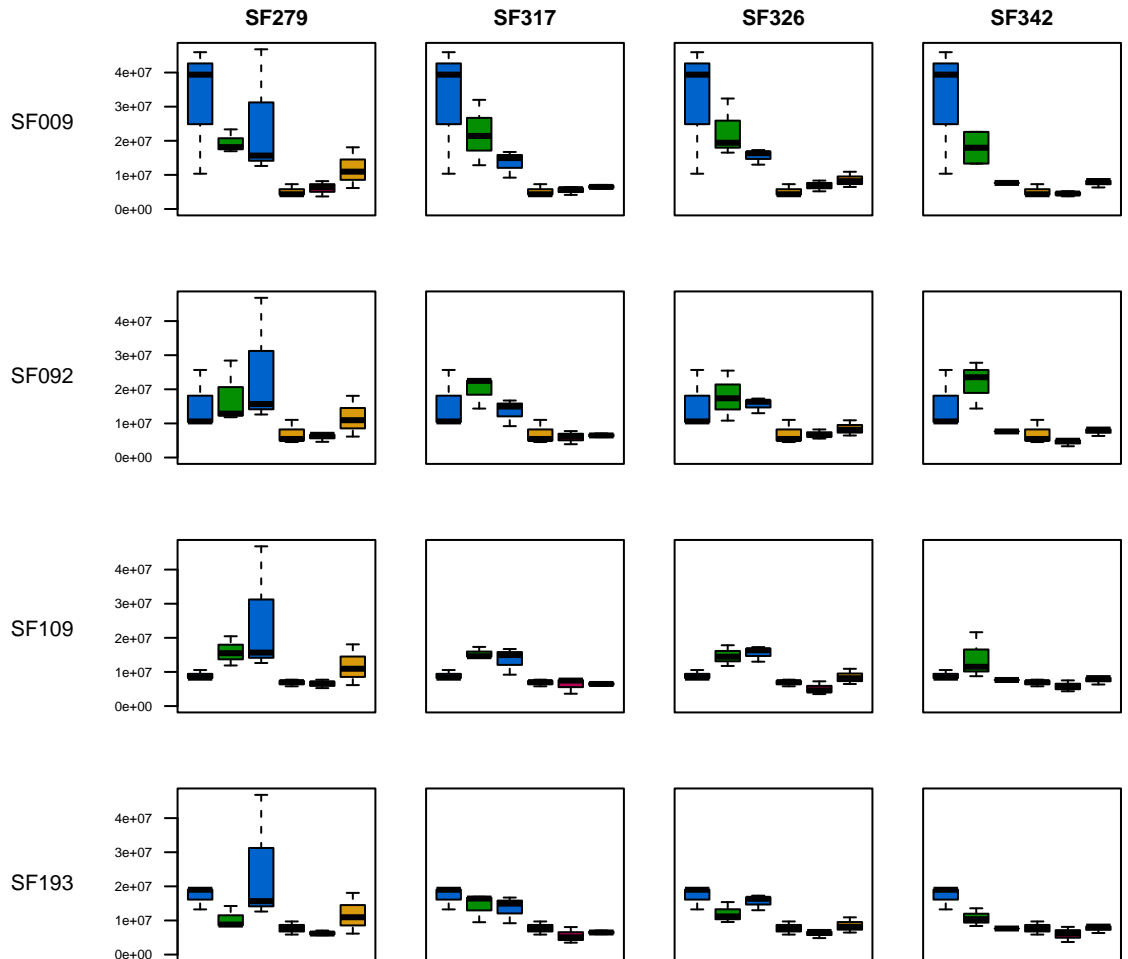

HanXRQChr09g0247741  
 Probable methionyl-tRNA synthetase /  
 methionine--tRNA ligase / MetRS (cpMetR)

Parents WW  
 Parents WD  
 Hybrids WW  
 Hybrids WD

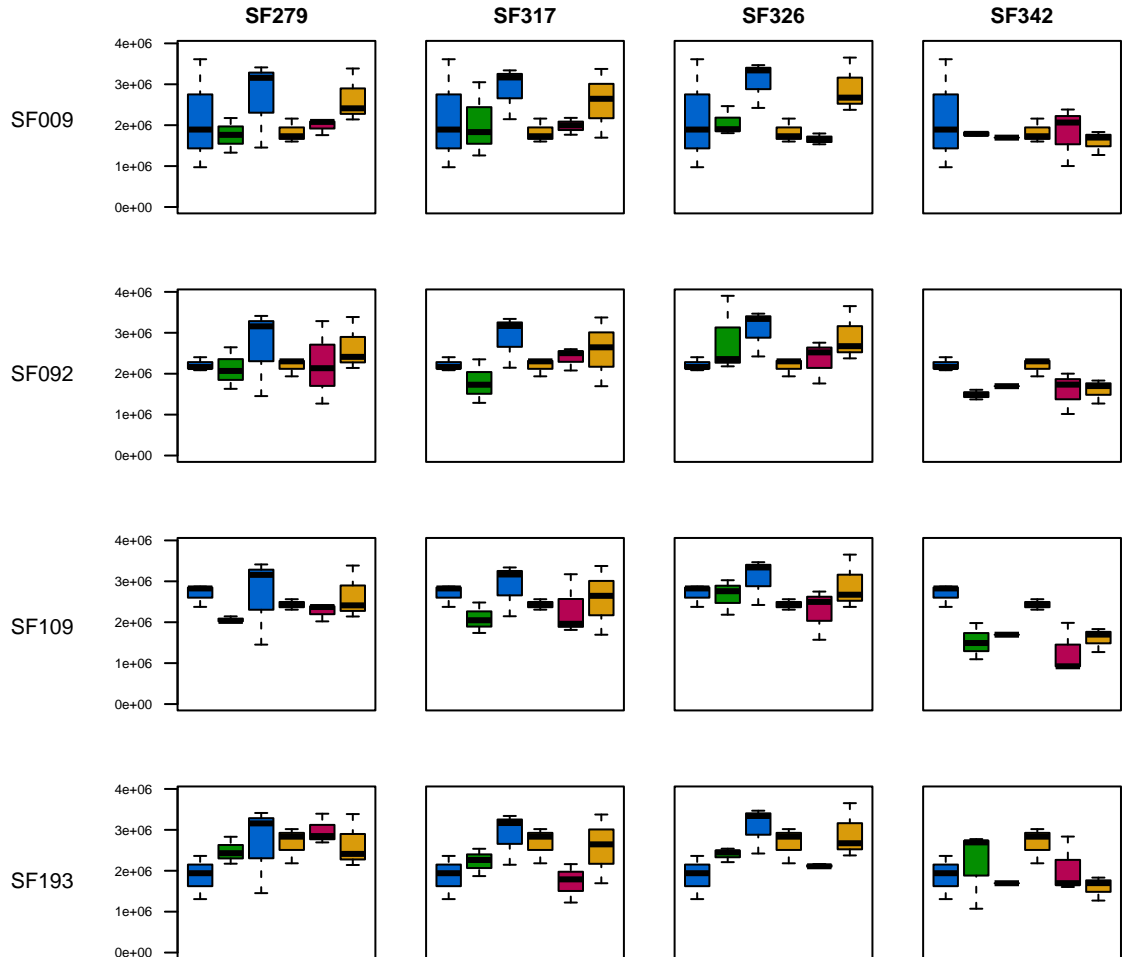

HanXRQChr05g0140771  
 Probable nucleosome assembly protein  
 1;3 Chaperone Coiled Cytoplasm Lipoprote

Parents WW  
 Parents WD  
 Hybrids WW  
 Hybrids WD

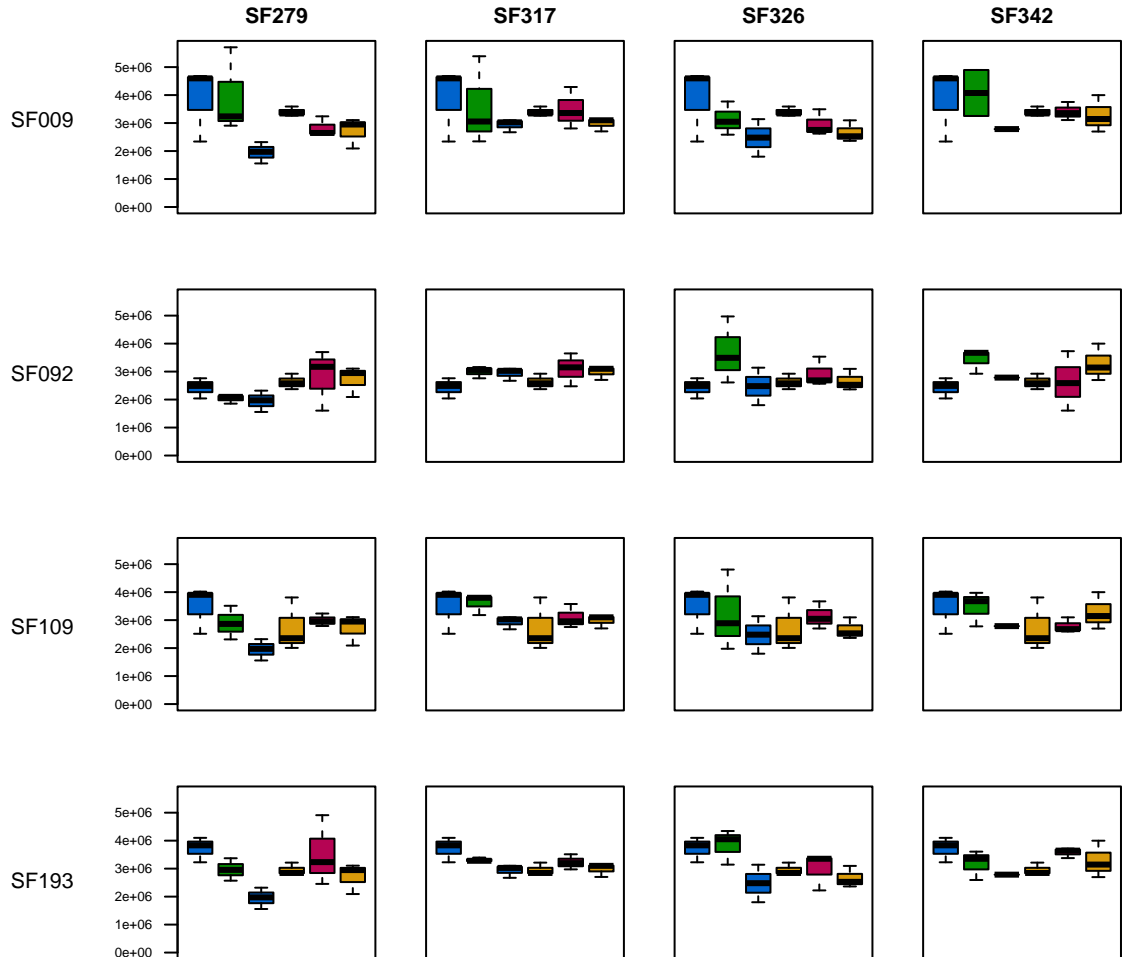

HanXRQChr08g0229151  
Probable fructose-2,6-bisphosphatase

Parents WW  
Parents WD  
Hybrids WW  
Hybrids WD

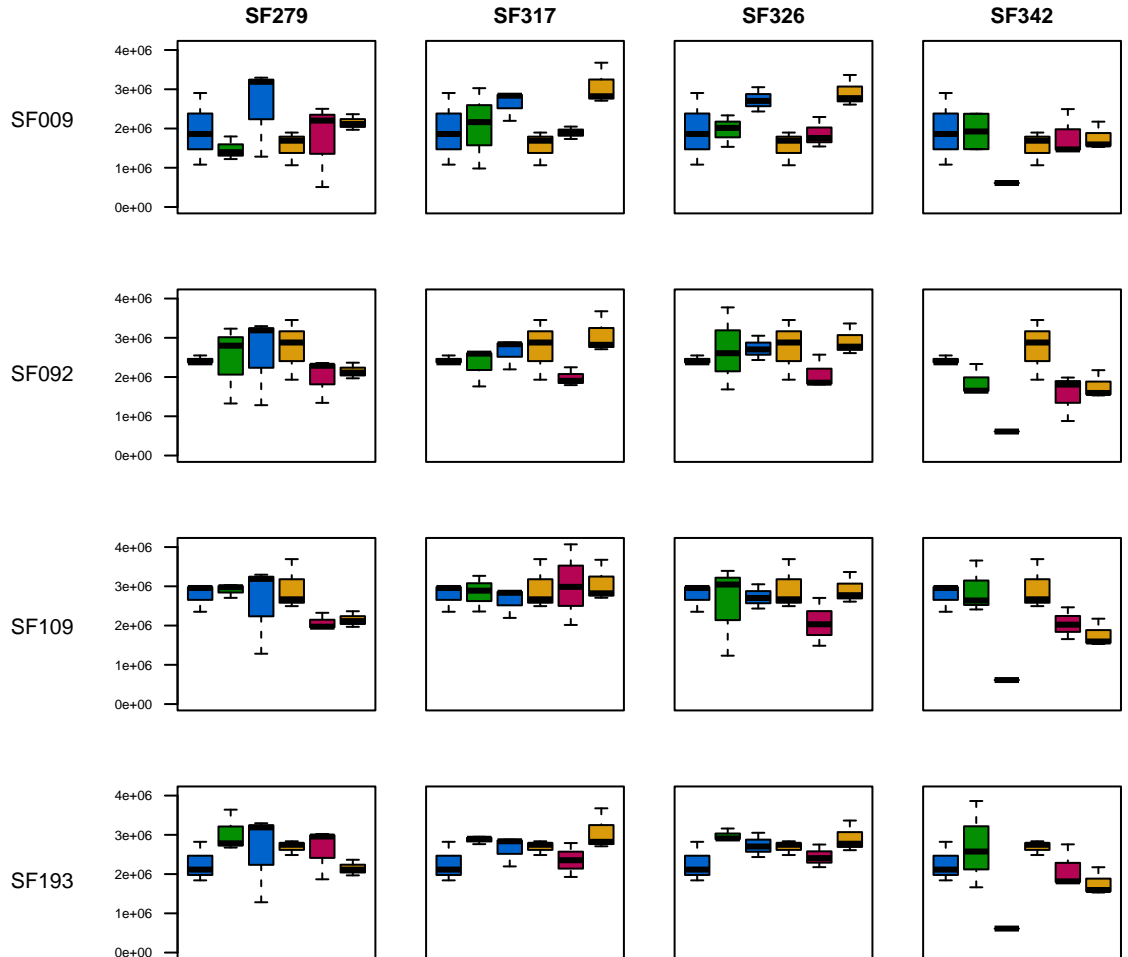

HanXRQChr08g0218671  
Putative LSM domain; Small  
ribonucleoprotein associated, SmB/SmN

Parents WW  
Parents WD  
Hybrids WW  
Hybrids WD

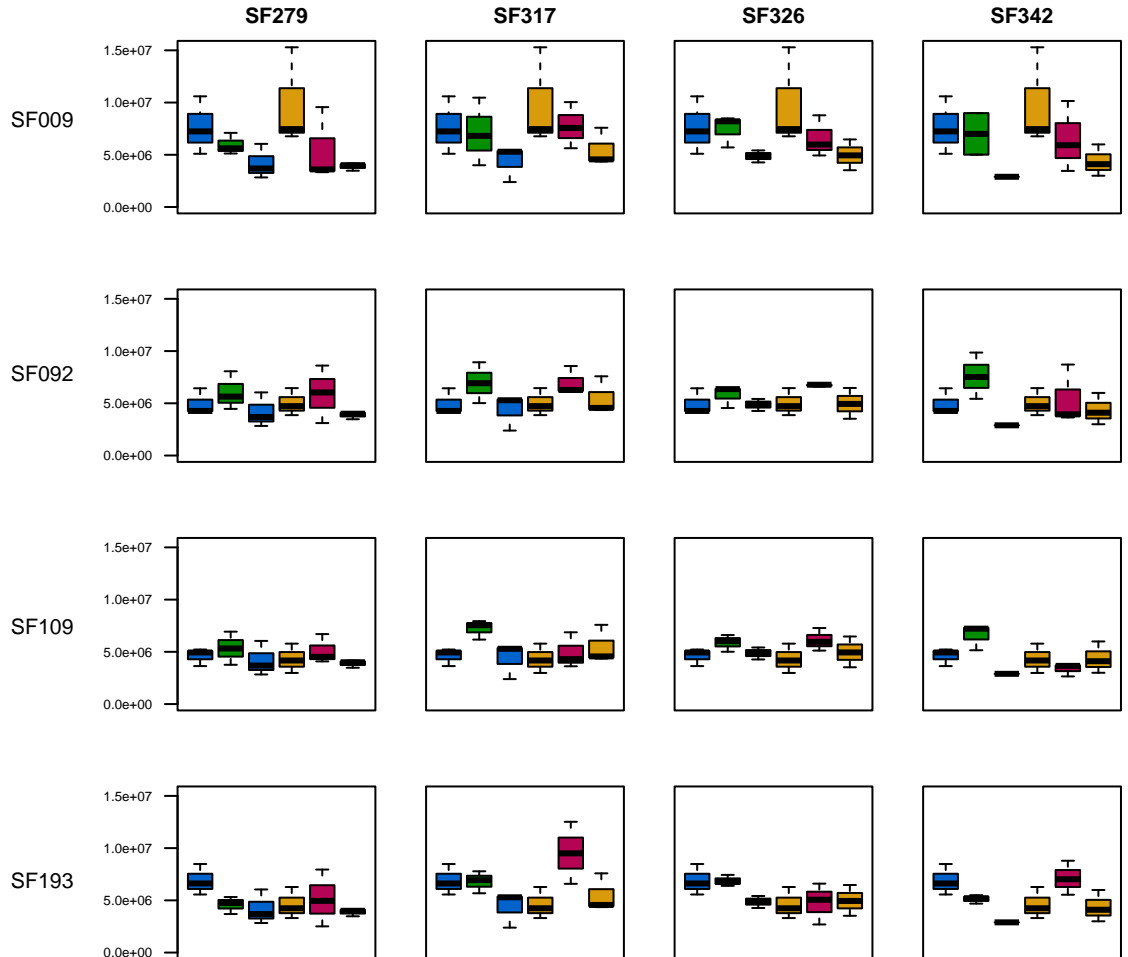

HanXRQChr14g0444711  
Putative winged helix–turn–helix  
DNA-binding domain; AT hook–like

Parents WW  
Parents WD  
Hybrids WW  
Hybrids WD

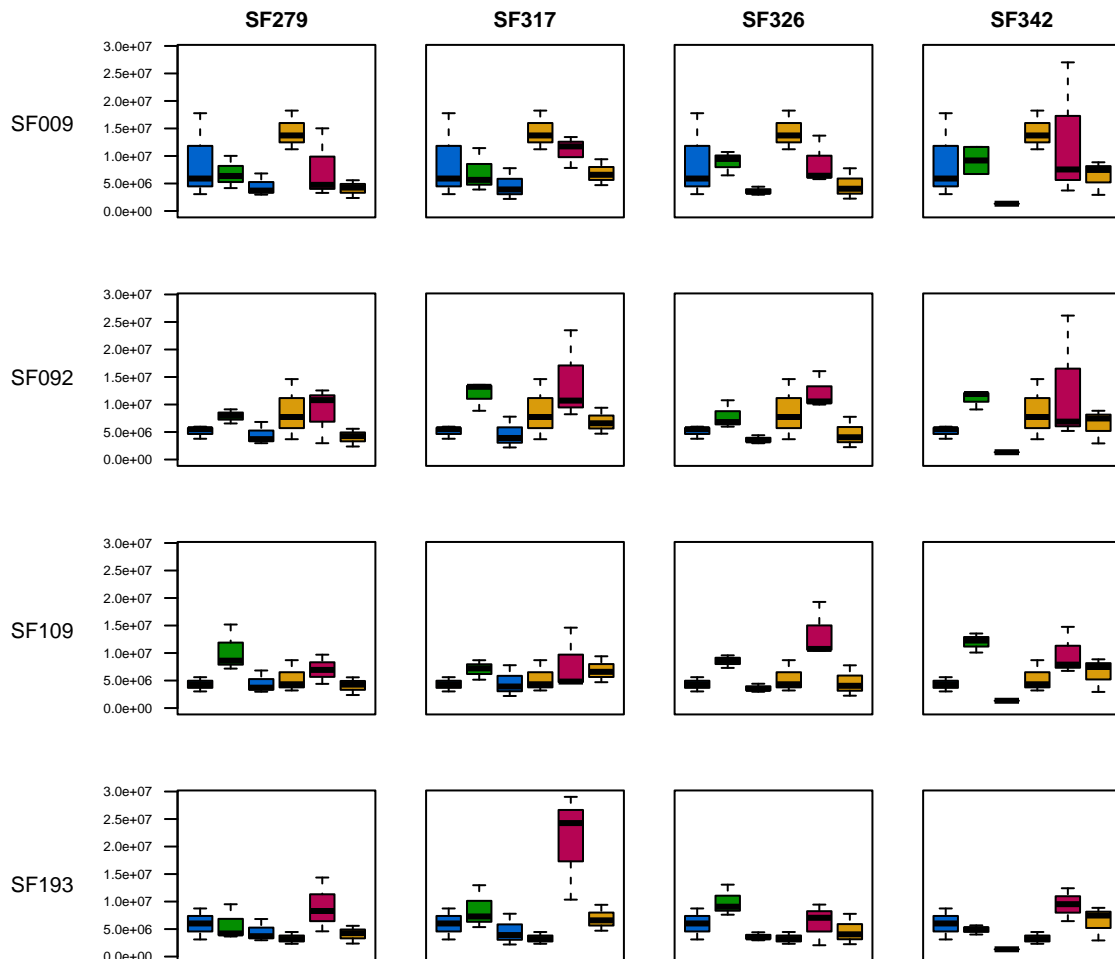



HanXRQChr17g0553731  
Probable peptidyl-prolyl cis-trans  
isomerase

Parents WW  
Parents WD  
Hybrids WW  
Hybrids WD

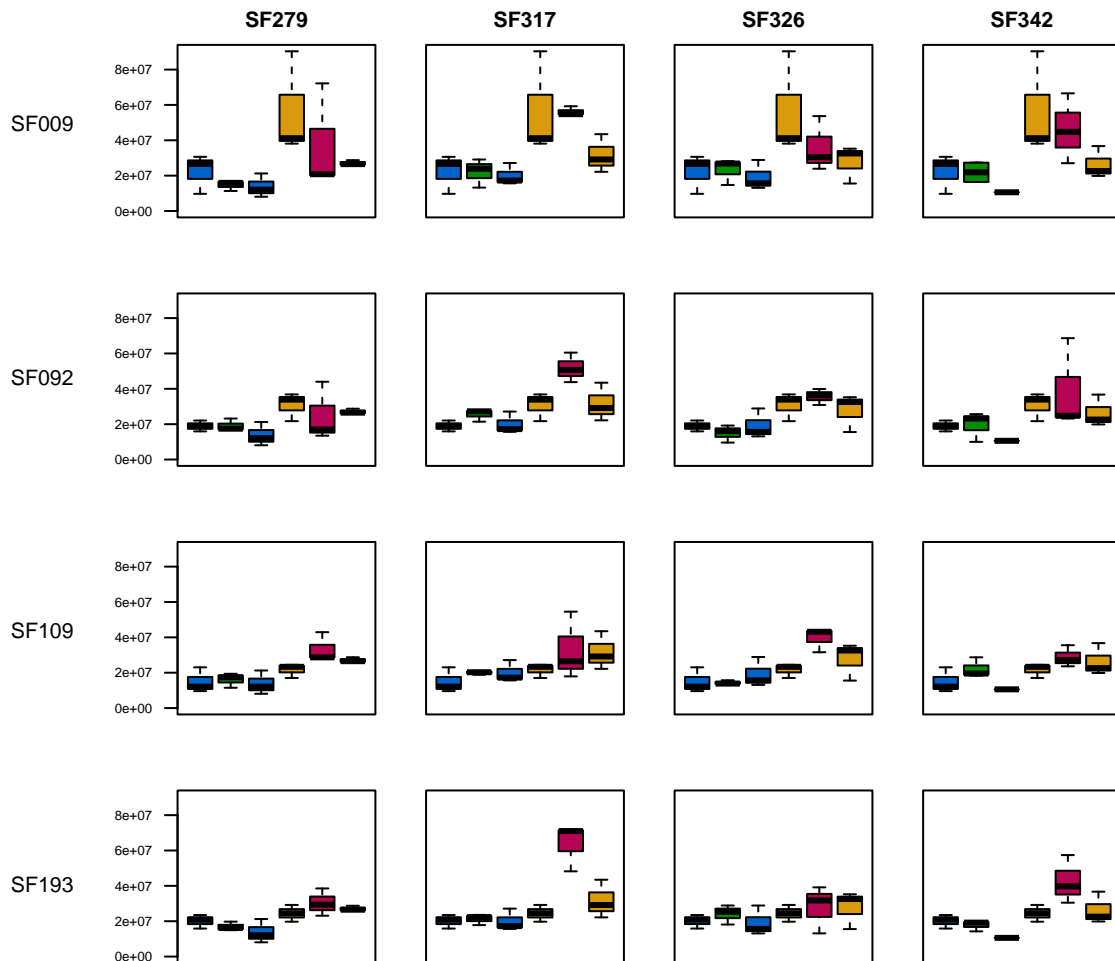

HanXRQChr03g0063761  
Putative glycoside hydrolase, family  
19; Lysozyme-like domain

Parents WW  
Parents WD  
Hybrids WW  
Hybrids WD

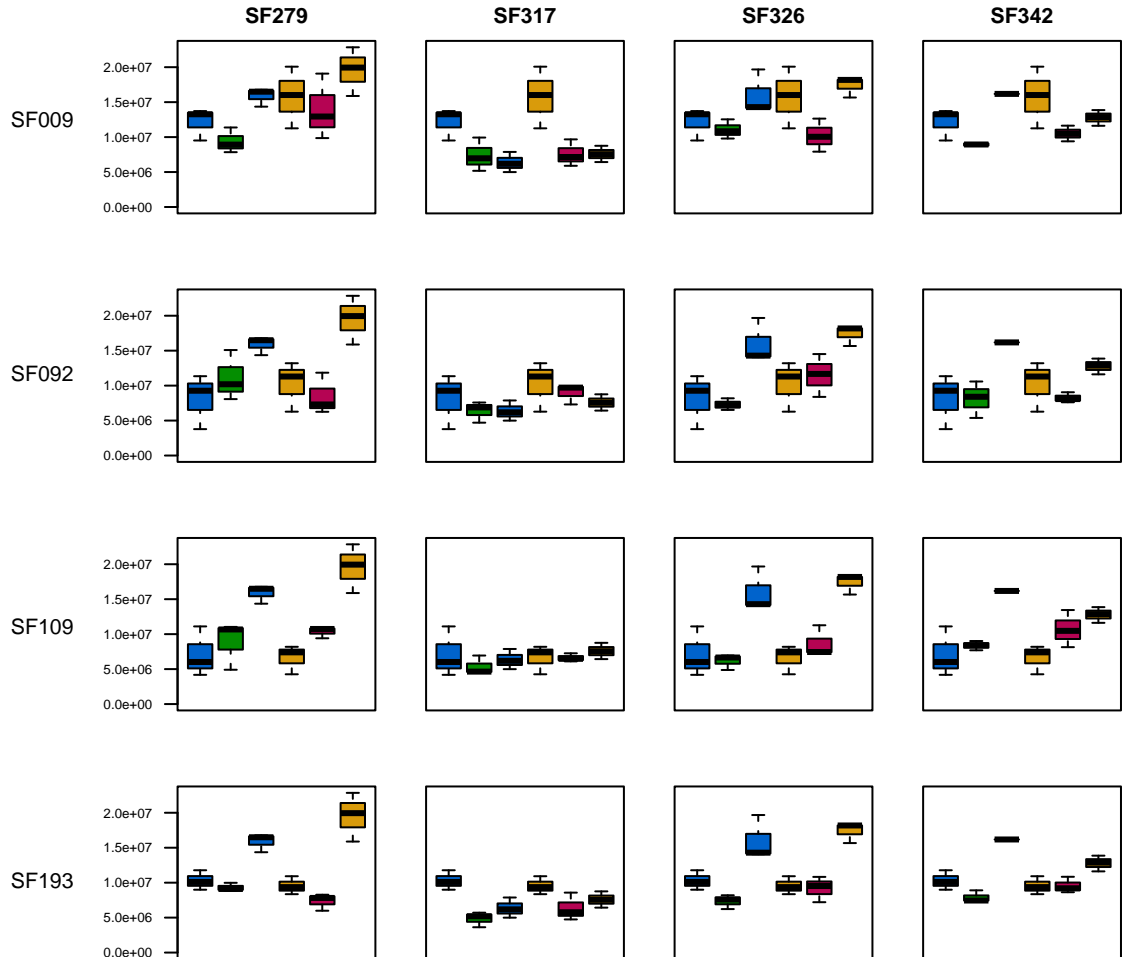

HanXRQChr10g0302051  
Putative leucine-rich repeat domain, L  
domain-like

Parents WW  
Parents WD  
Hybrids WW  
Hybrids WD

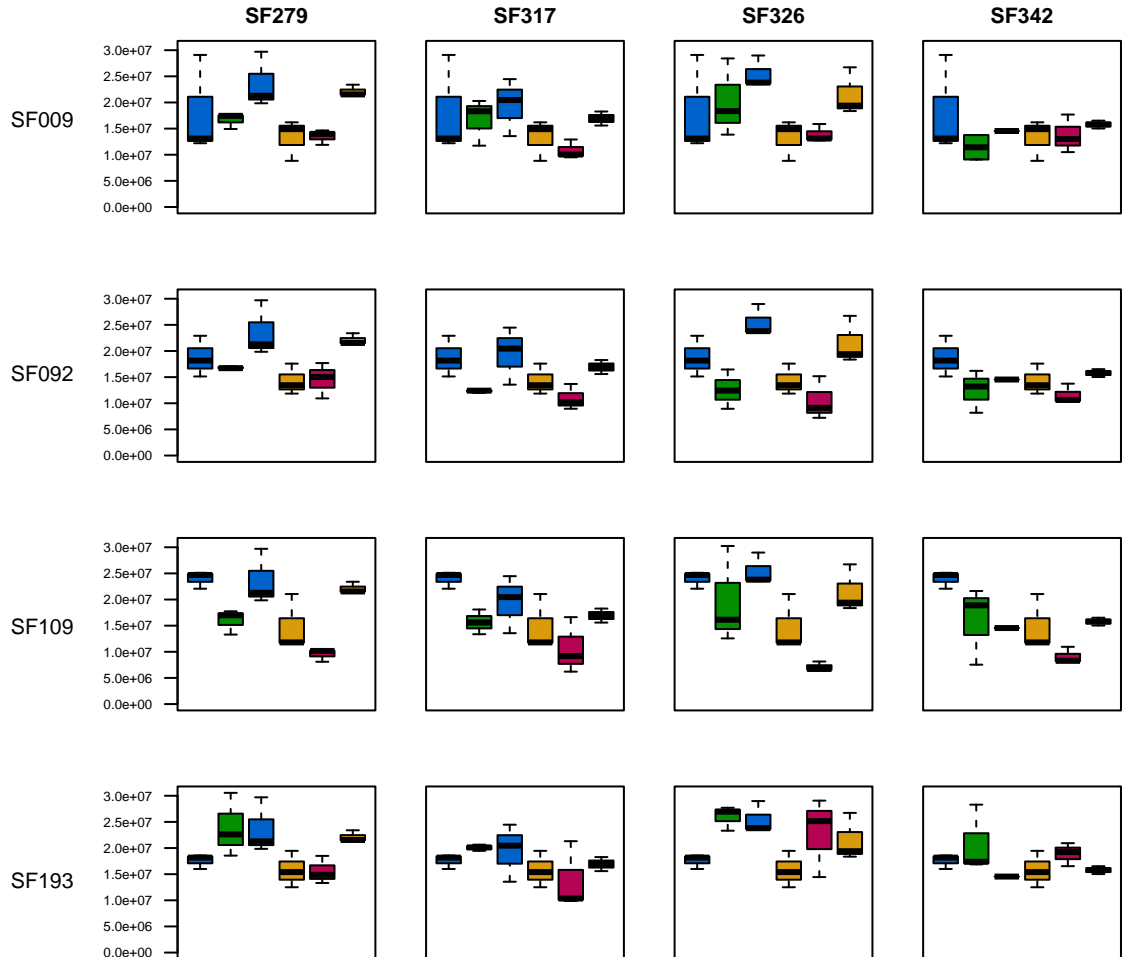

HanXRQChr15g0475391  
 Putative serine  
 hydroxymethyltransferase; Pyridoxal phospl

Parents WW  
 Parents WD  
 Hybrids WW  
 Hybrids WD

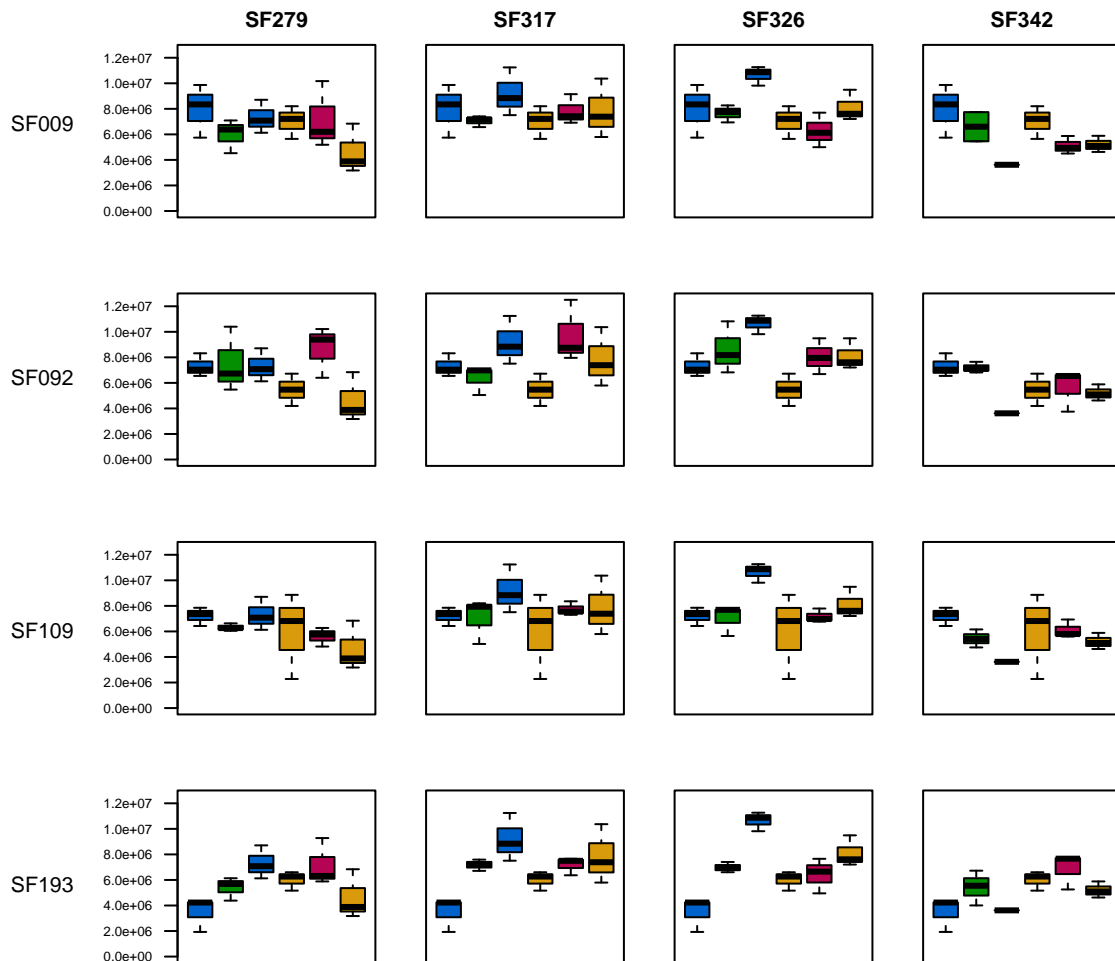

HanXRQChr08g0231851  
Putative beta-grasp domain

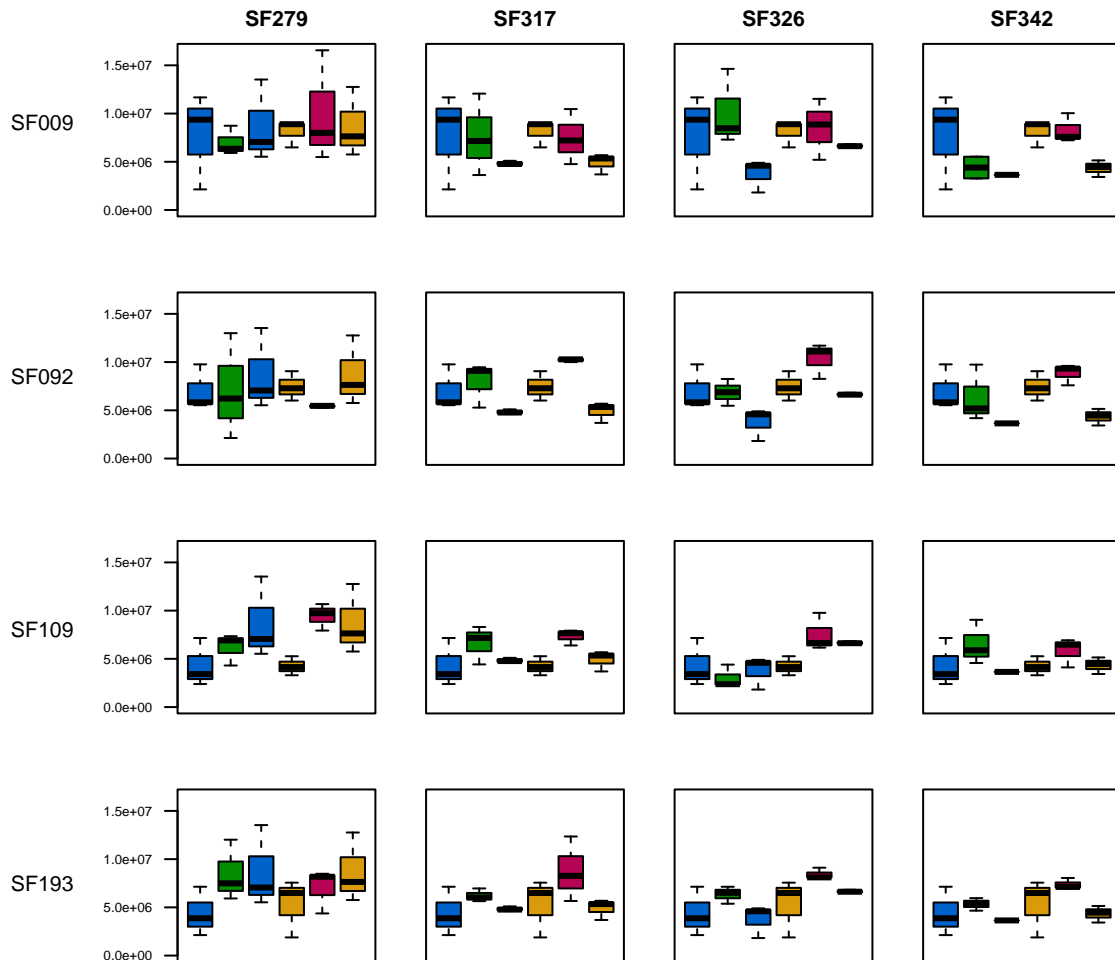

HanXRQChr12g0359481  
Probable glutamine synthetase,  
chloroplastic

Parents WW  
Parents WD  
Hybrids WW  
Hybrids WD

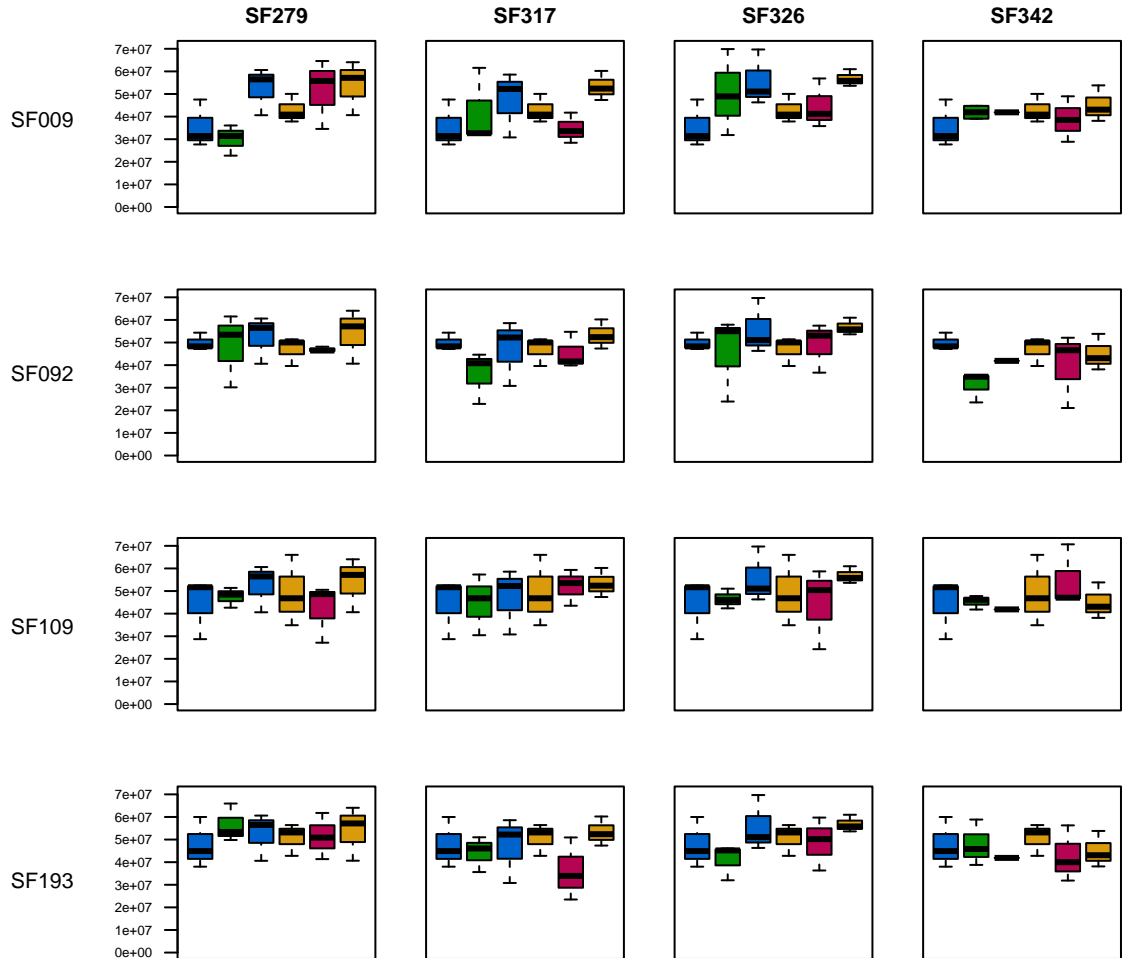

HanXRQChr11g0328441  
Probable thioredoxin M-type 4

Parents WW  
Parents WD  
Hybrids WW  
Hybrids WD

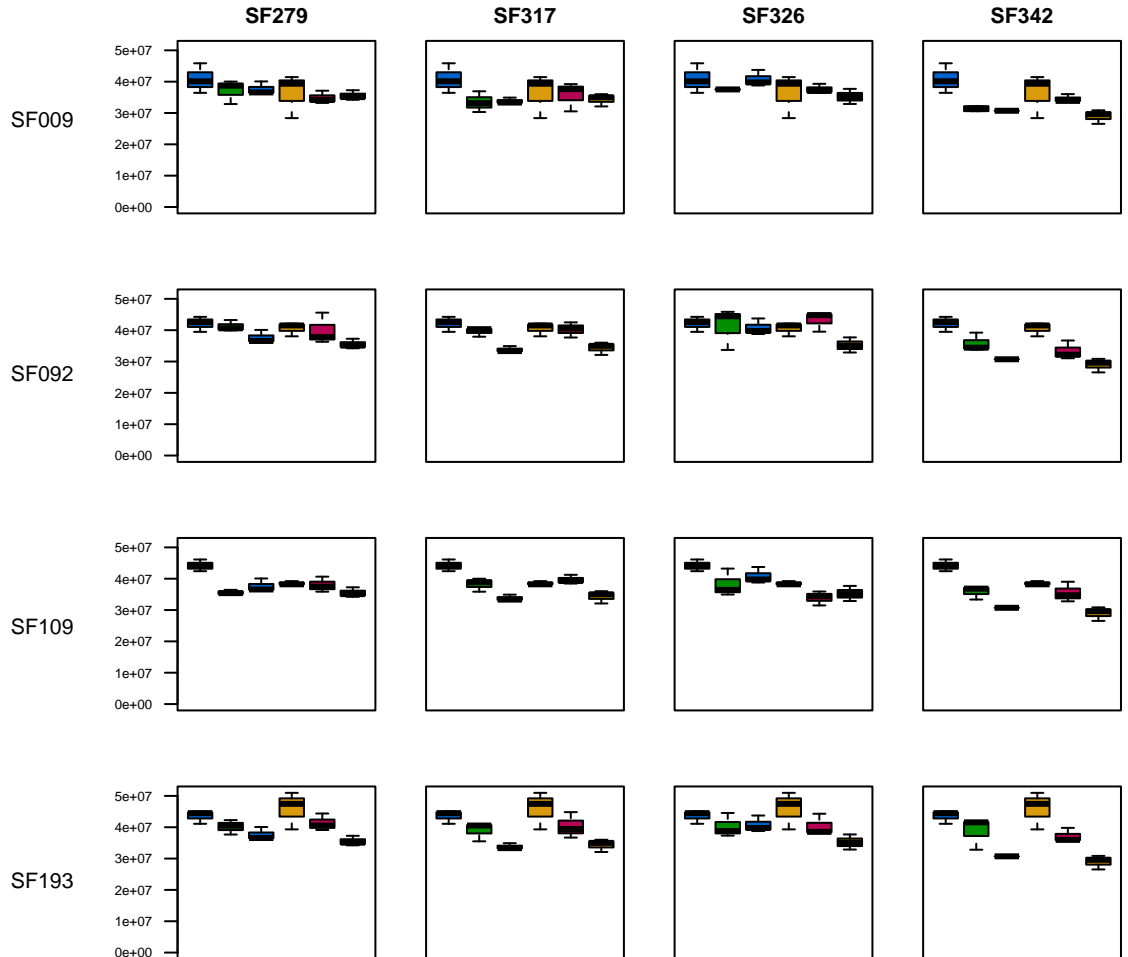

HanXRQChr01g0019141  
Probable chaperonin-60alpha

Parents WW  
Parents WD  
Hybrids WW  
Hybrids WD

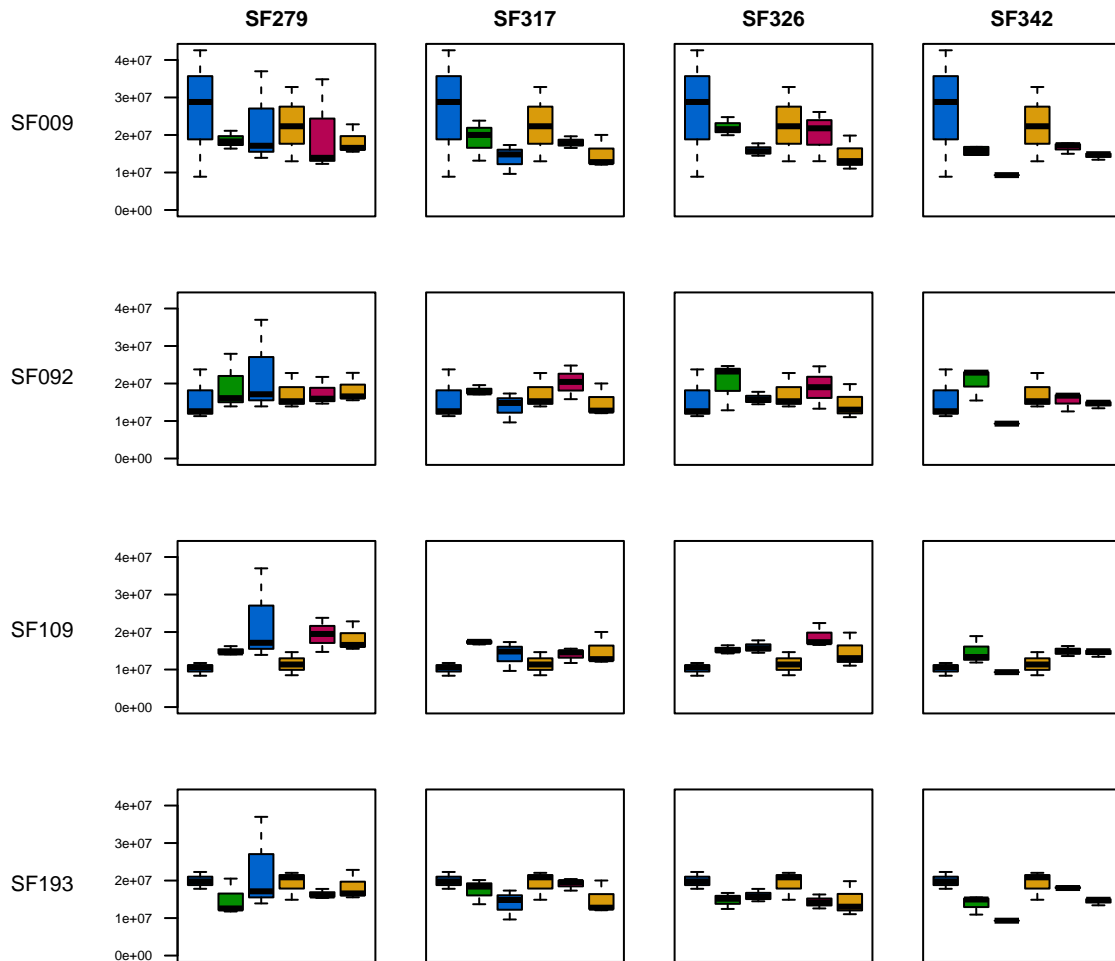



HanXRQChr10g0319691  
Probable auxin-binding protein ABP19a

Parents WW  
Parents WD  
Hybrids WW  
Hybrids WD

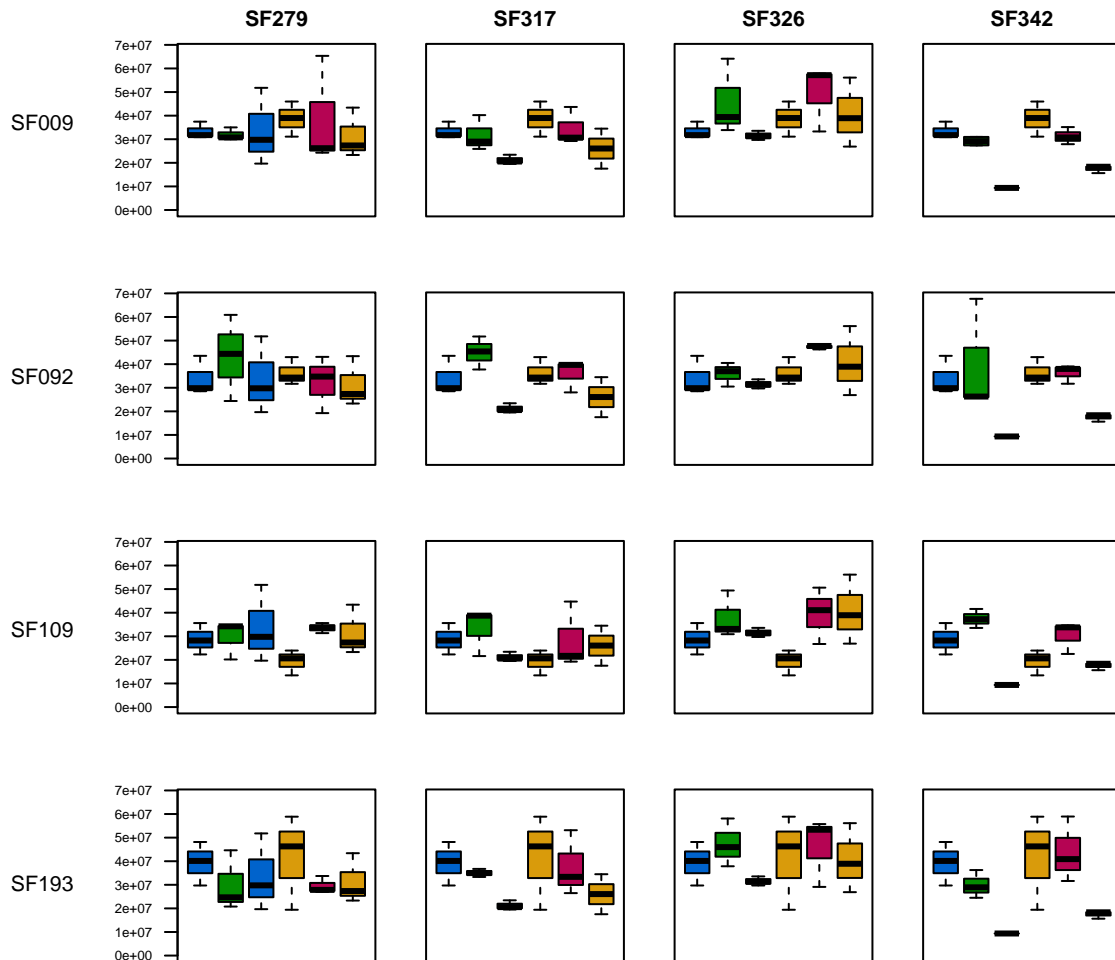

HanXRQChr07g0206291  
Putative clp, N-terminal

Parents WW  
Parents WD  
Hybrids WW  
Hybrids WD

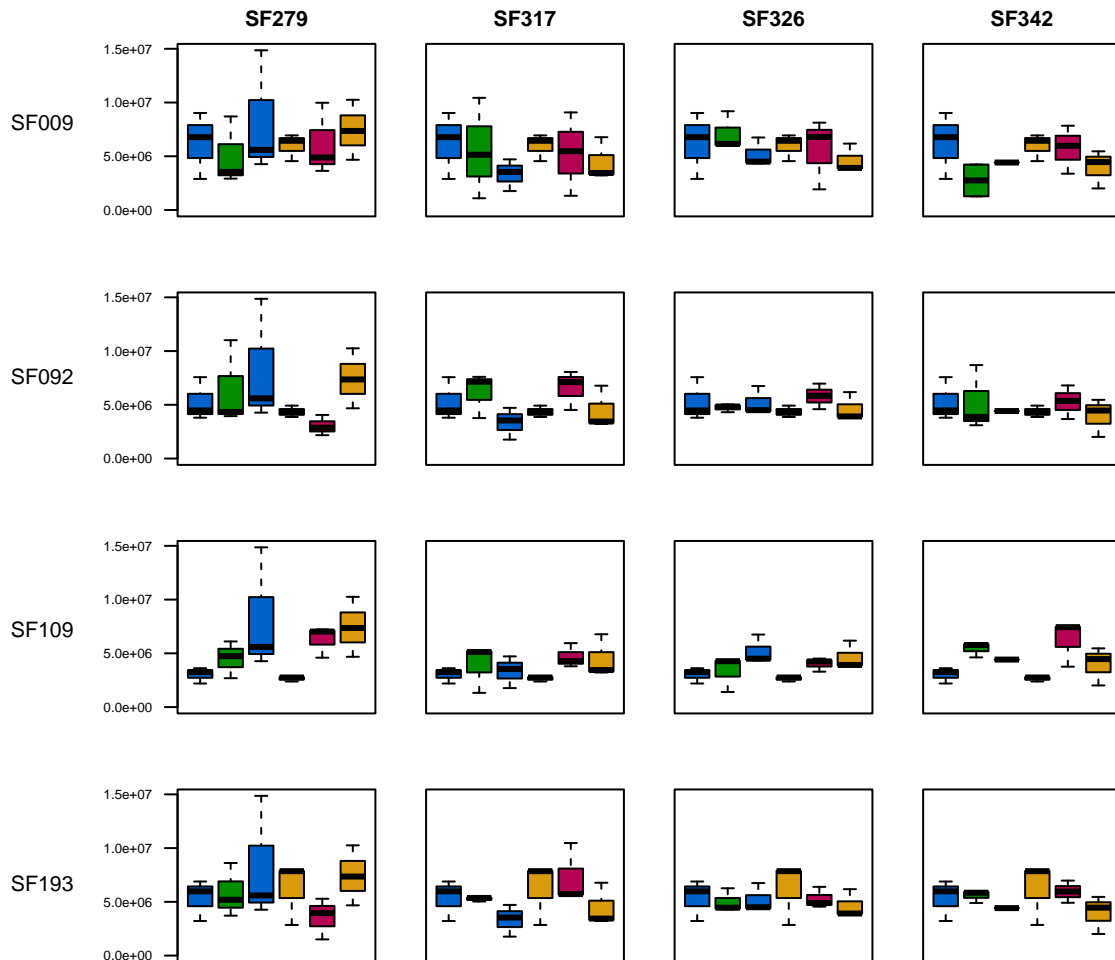

HanXRQChr15g0486581  
Putative TPM domain

- Parents WW
- Parents WD
- Hybrids WW
- Hybrids WD

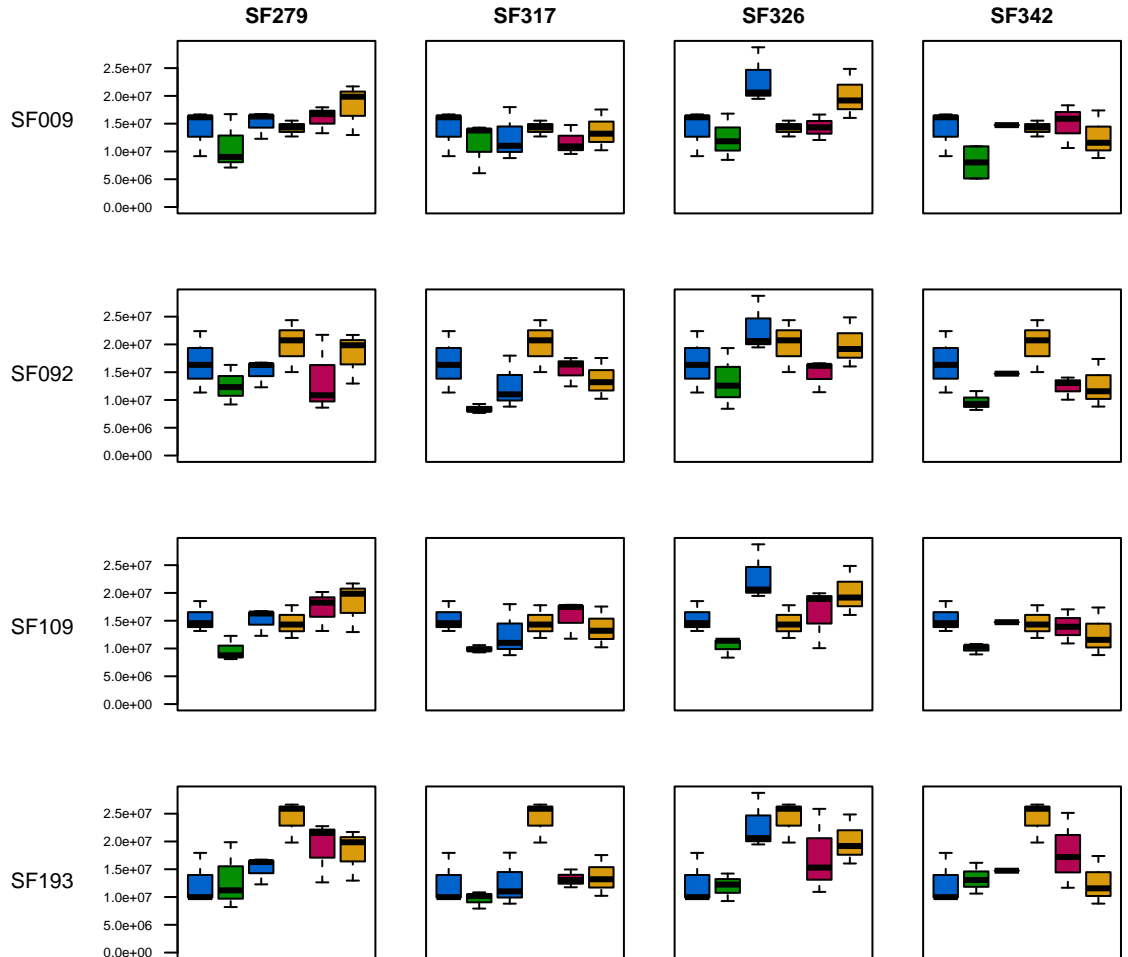

HanXRQChr04g0113581  
 Probable photosystem I reaction center  
 subunit psaK, chloroplastic

Parents WW  
 Parents WD  
 Hybrids WW  
 Hybrids WD

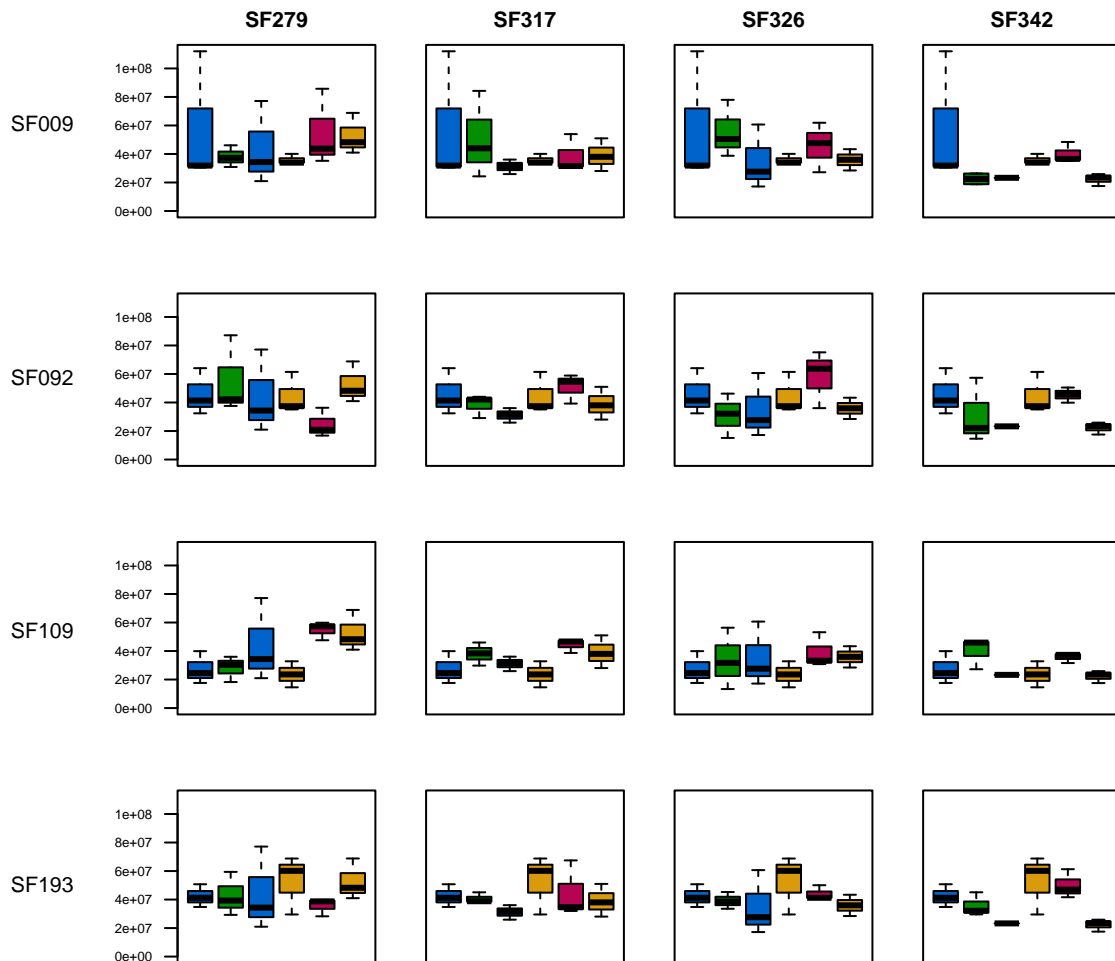

HanXRQChr01g0026961  
Probable benzyl alcohol  
O-benzoyltransferase

Parents WW  
Parents WD  
Hybrids WW  
Hybrids WD

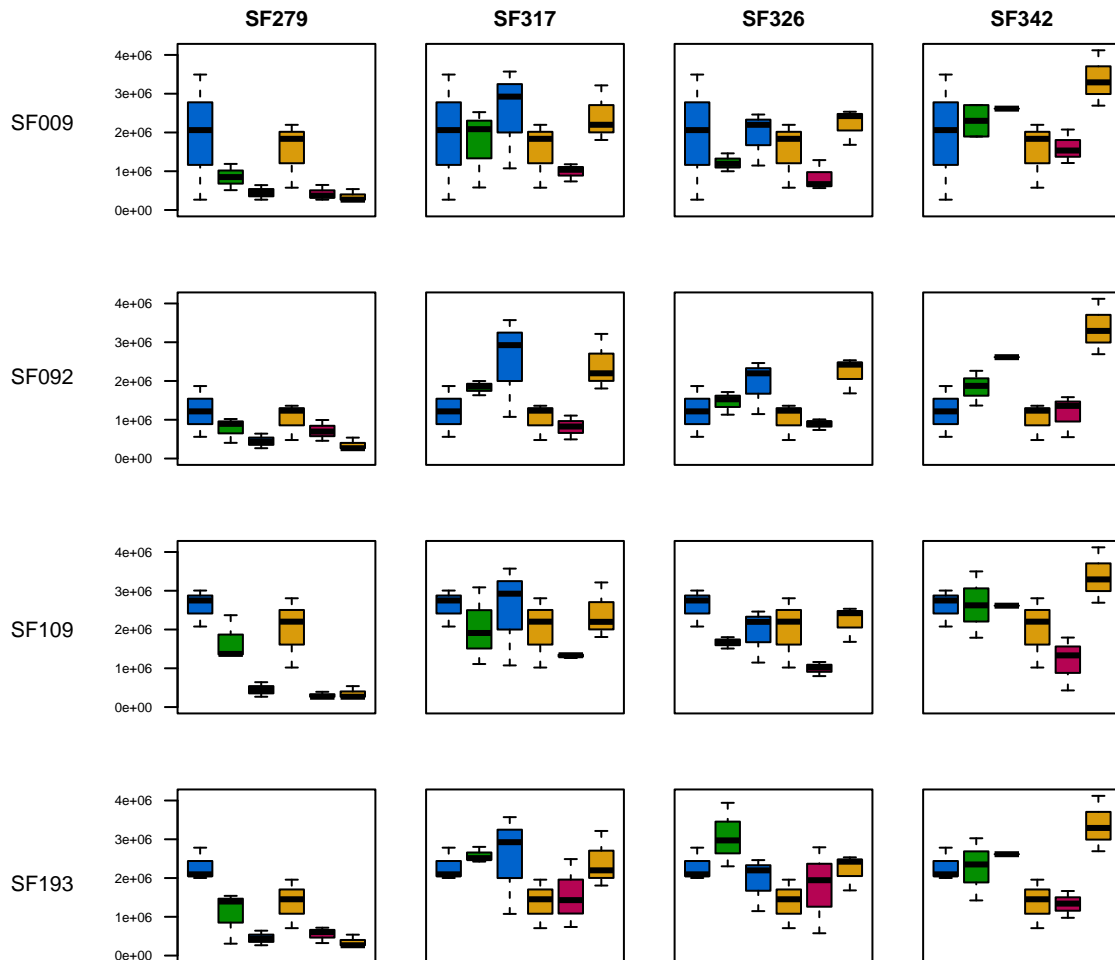

HanXRQChr06g0175431  
Putative ribosomal protein S27e;  
Zinc-binding ribosomal protein

Parents WW  
Parents WD  
Hybrids WW  
Hybrids WD

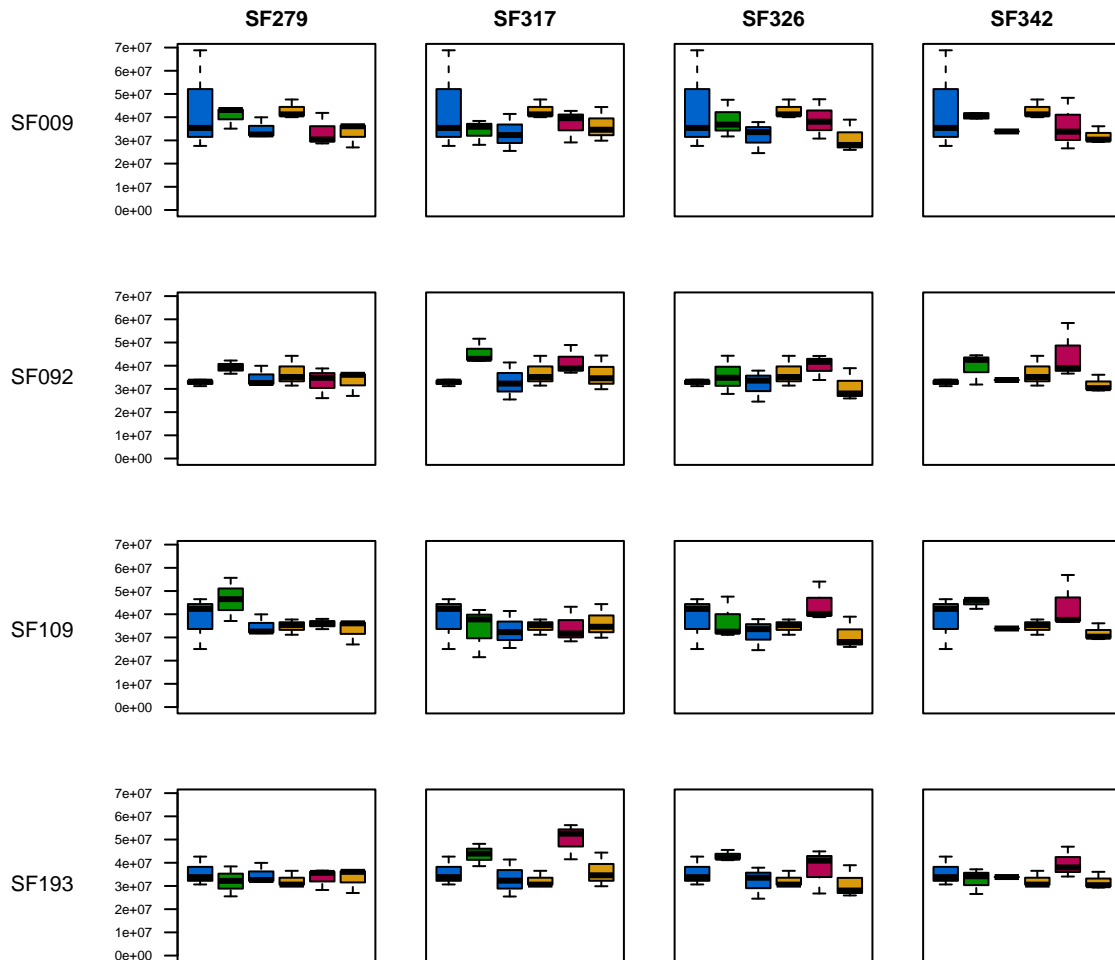

HanXRQChr17g0562001  
Putative  
UDP-glucuronosyl/UDP-glucosyltransferas

Parents WW  
Parents WD  
Hybrids WW  
Hybrids WD

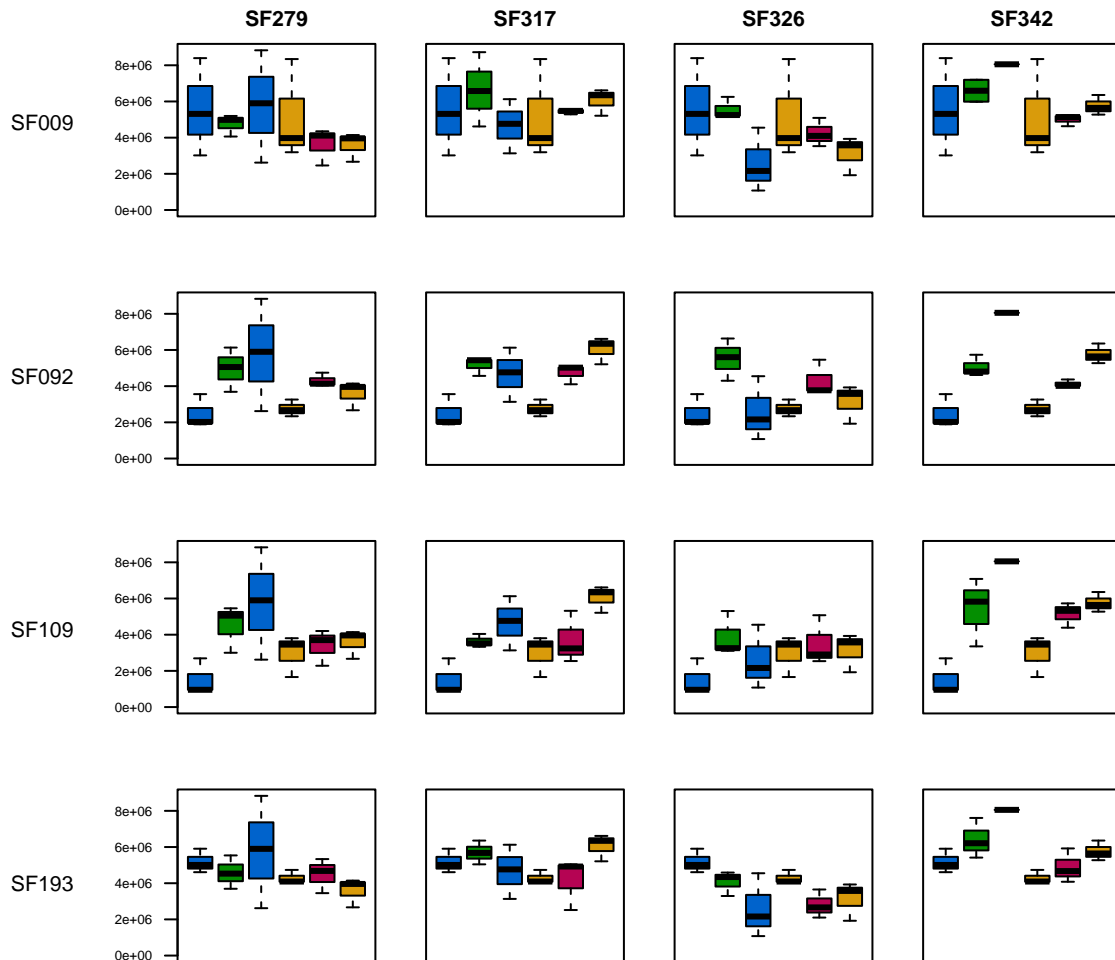

HanXRQChr12g0372411  
Probable proteasome subunit beta type-5

- Parents WW
- Parents WD
- Hybrids WW
- Hybrids WD

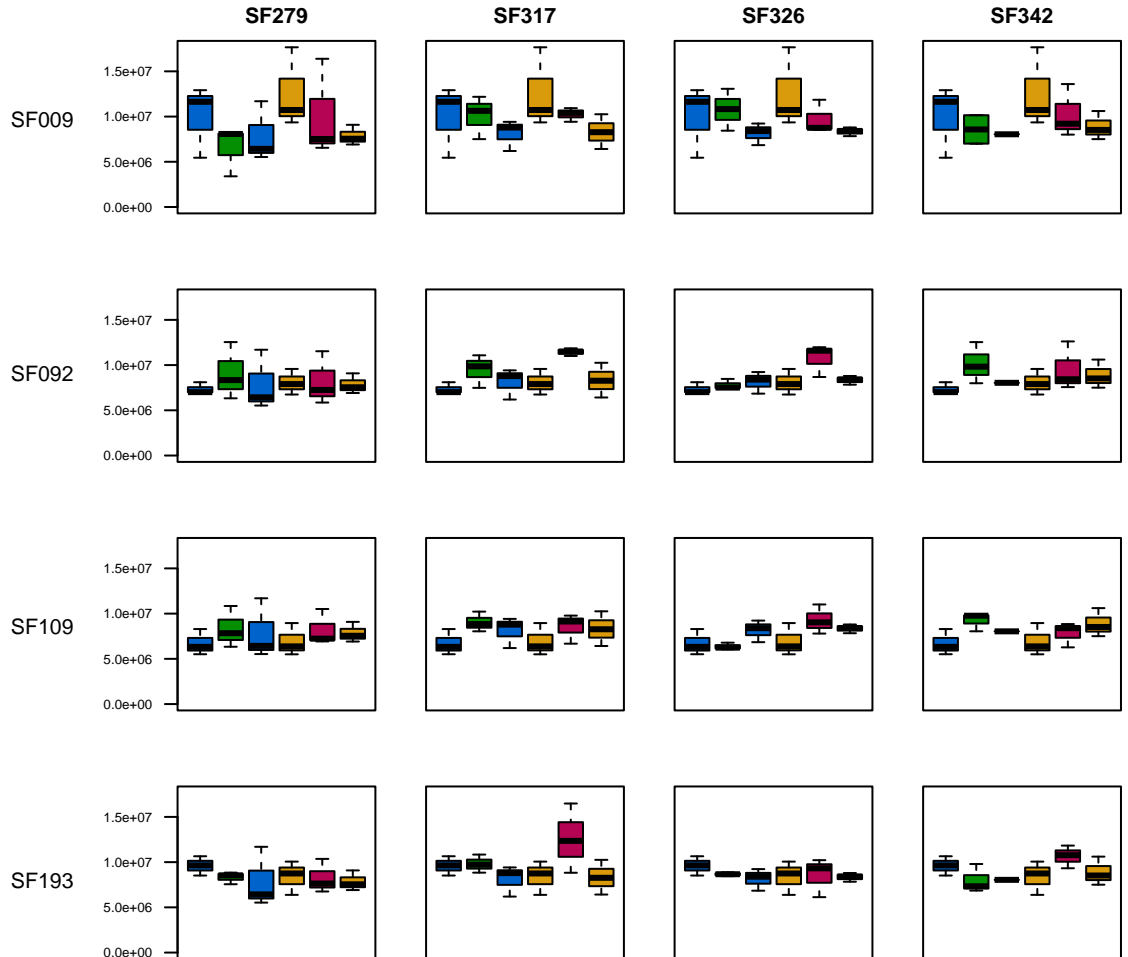



HanXRQChr01g0017621  
Probable nucleoside diphosphate kinase

- Parents WW
- Parents WD
- Hybrids WW
- Hybrids WD

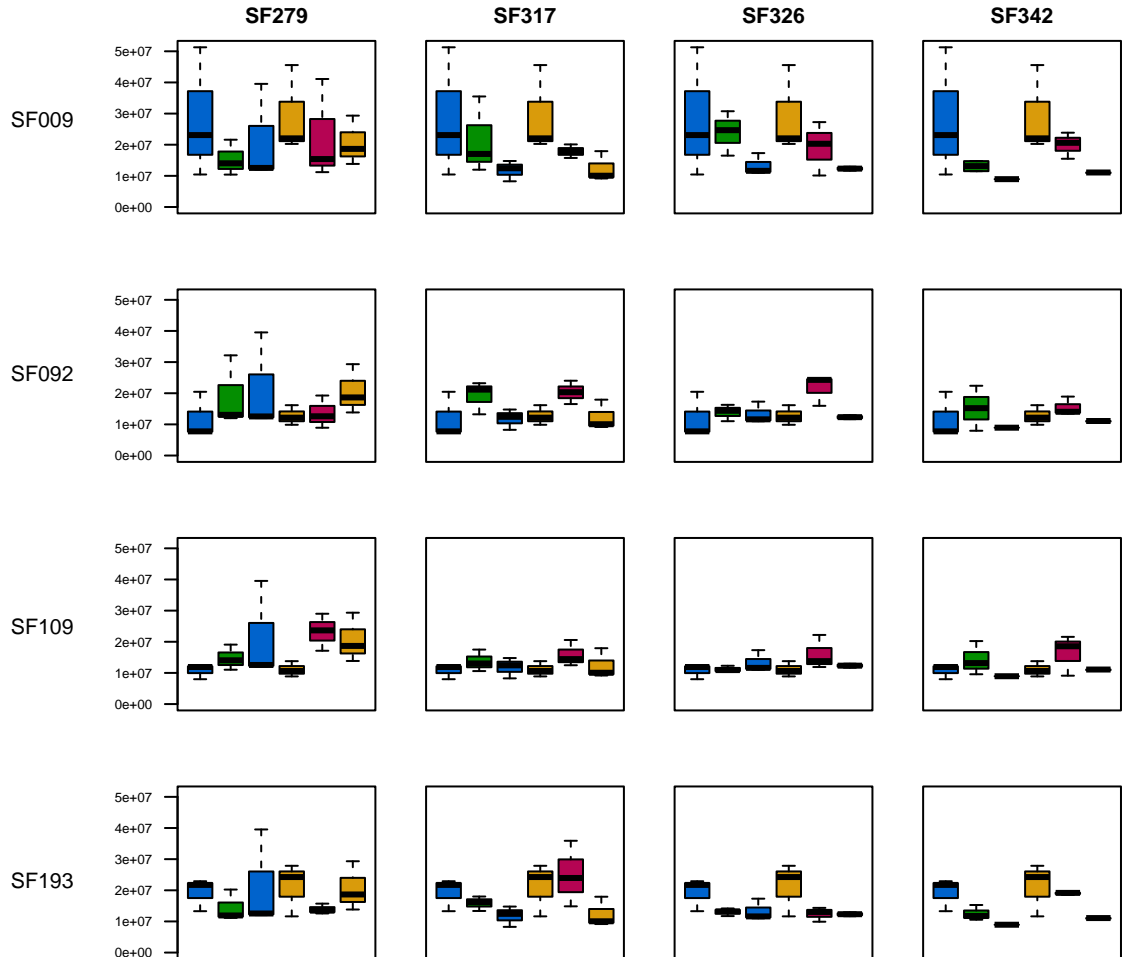

HanXRQChr15g0468781  
Putative aminotransferase class-III;  
Pyridoxal phosphate-dependent transferase

Parents WW  
Parents WD  
Hybrids WW  
Hybrids WD

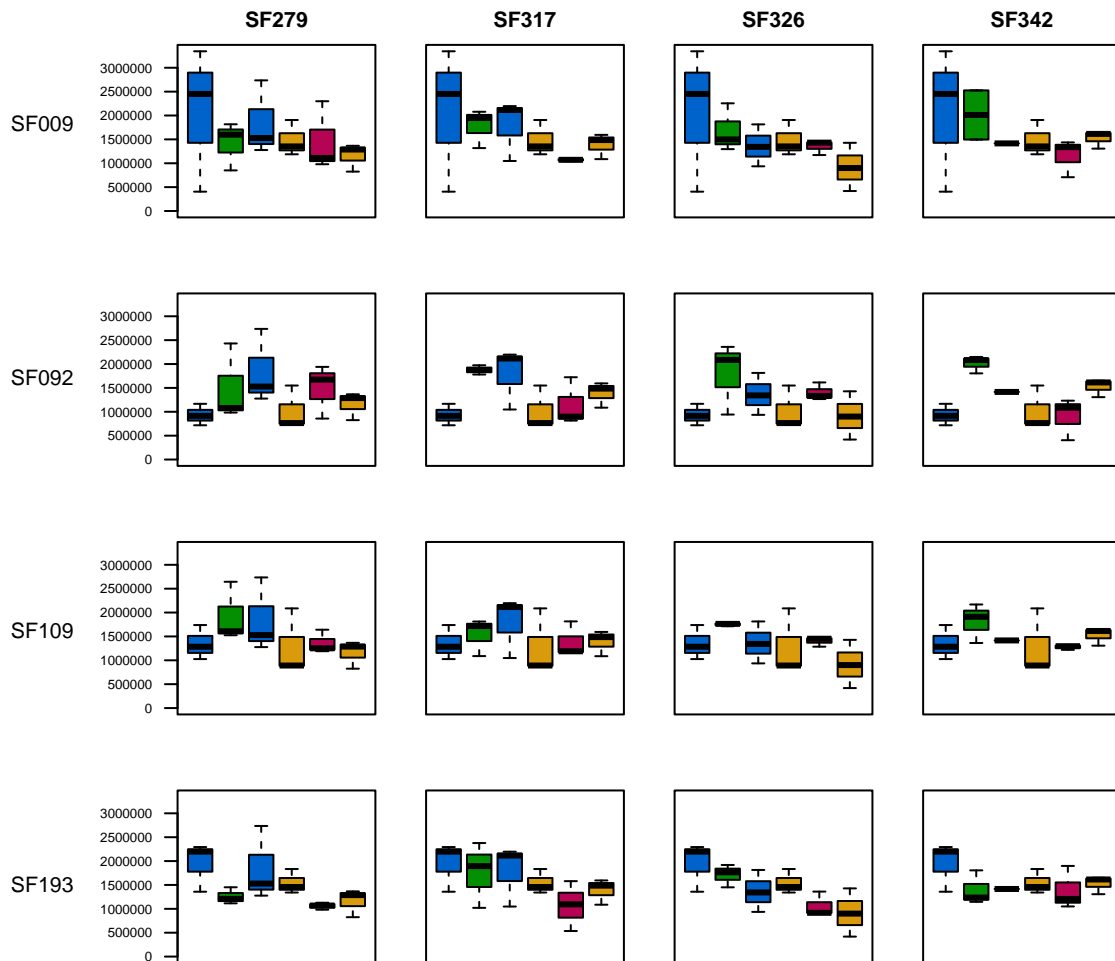

HanXRQChr05g0145281  
Putative C2 domain; Synaptotagmin-like  
mitochondrial-lipid-binding domain

Parents WW  
Parents WD  
Hybrids WW  
Hybrids WD

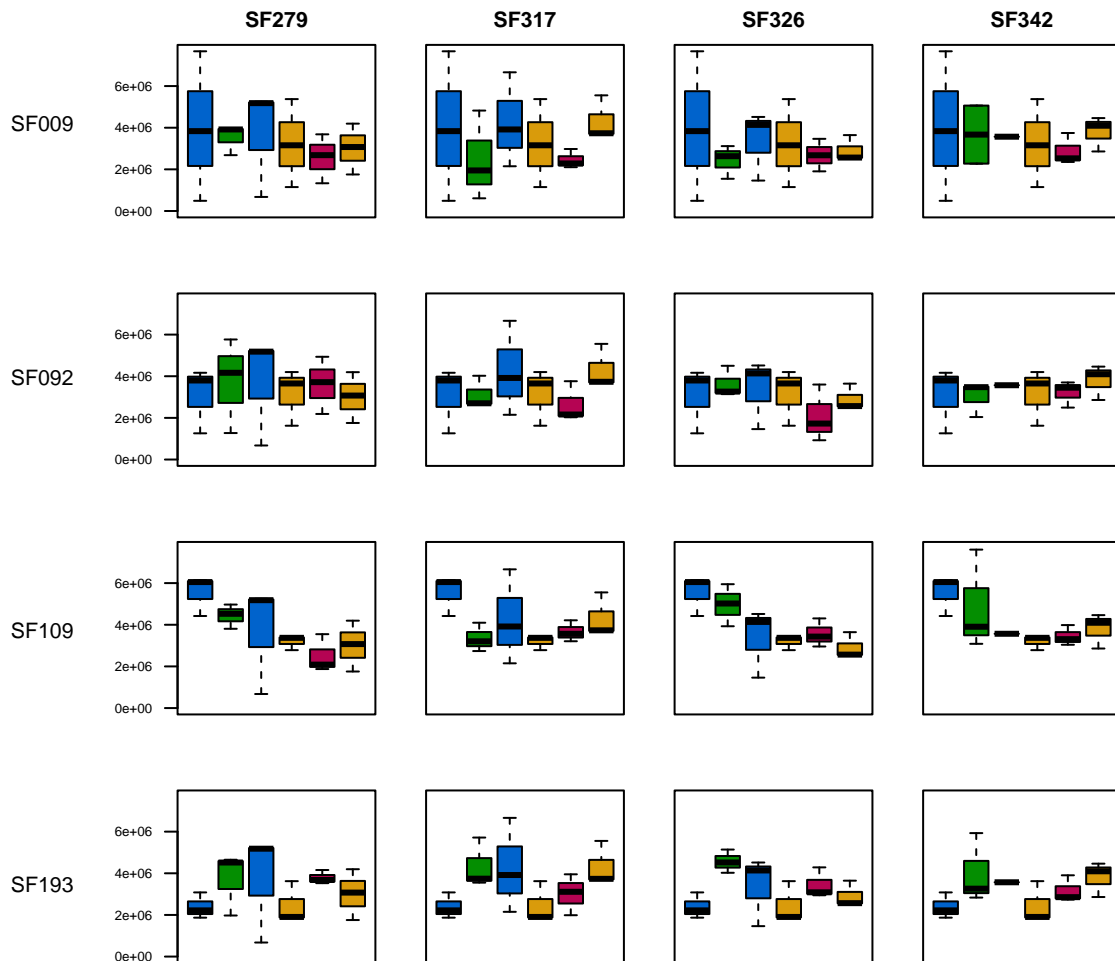

HanXRQChr10g0318911  
Probable 6-phosphogluconate  
dehydrogenase family protein

Parents WW  
Parents WD  
Hybrids WW  
Hybrids WD

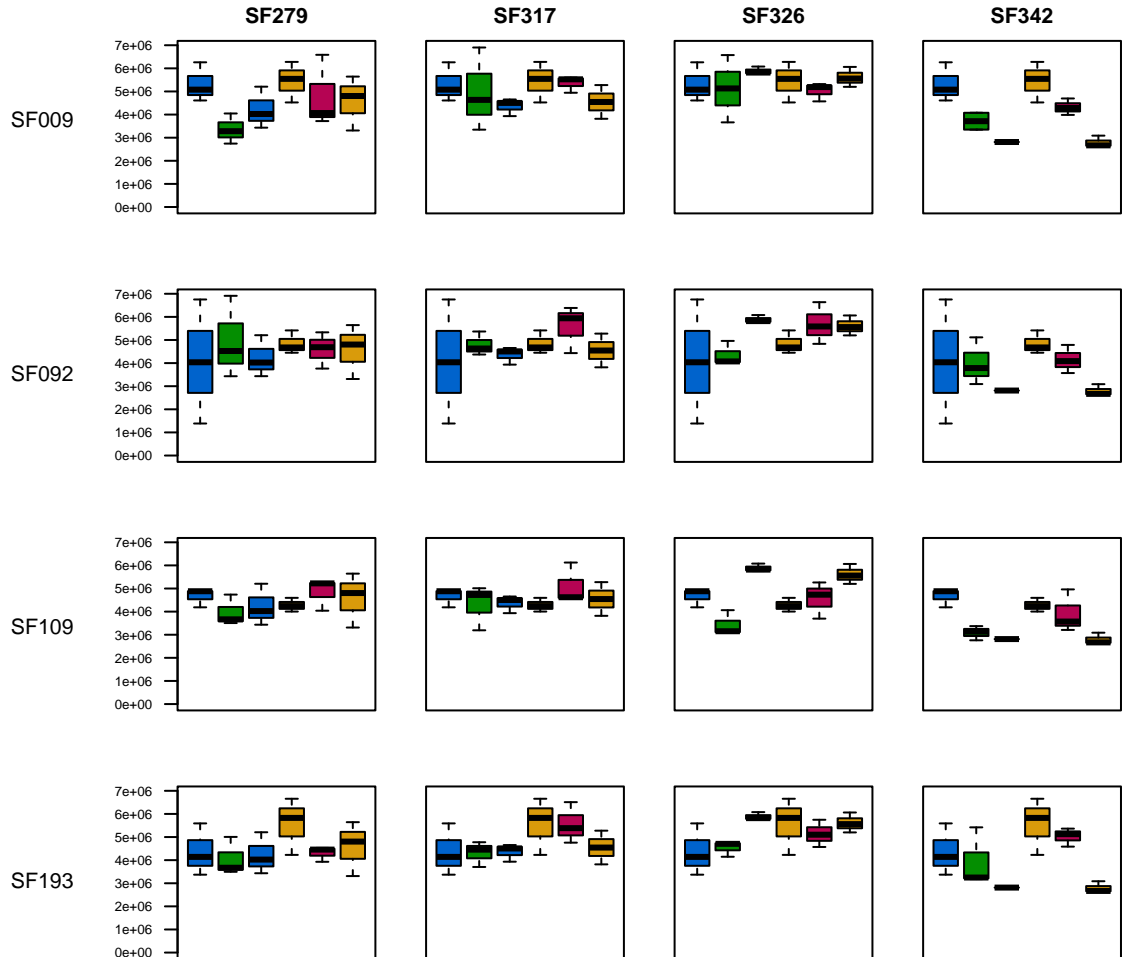

HanXRQChr01g0013431  
Putative CBS domain

Parents WW  
Parents WD  
Hybrids WW  
Hybrids WD

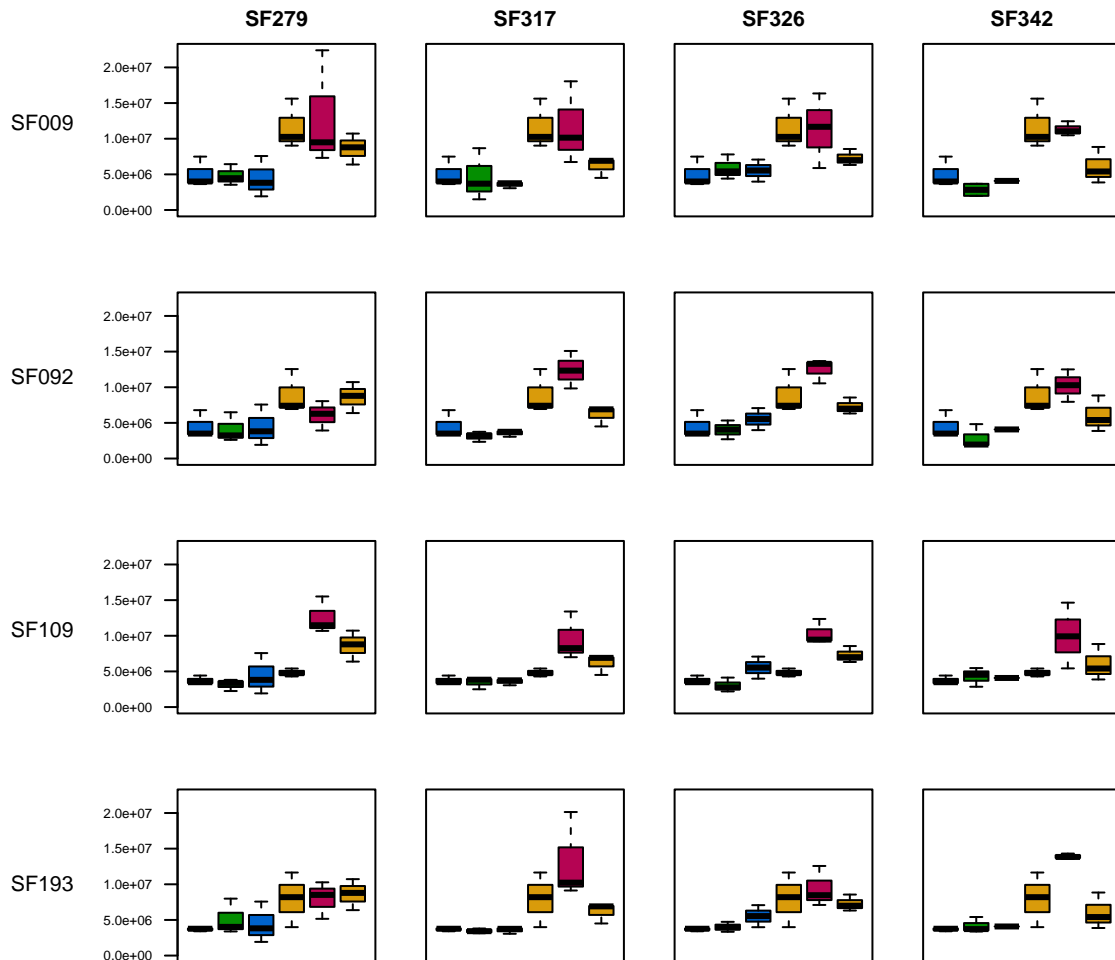

HanXRQChr17g0539661  
Probable DC1 domain-containing protein

Parents WW  
Parents WD  
Hybrids WW  
Hybrids WD

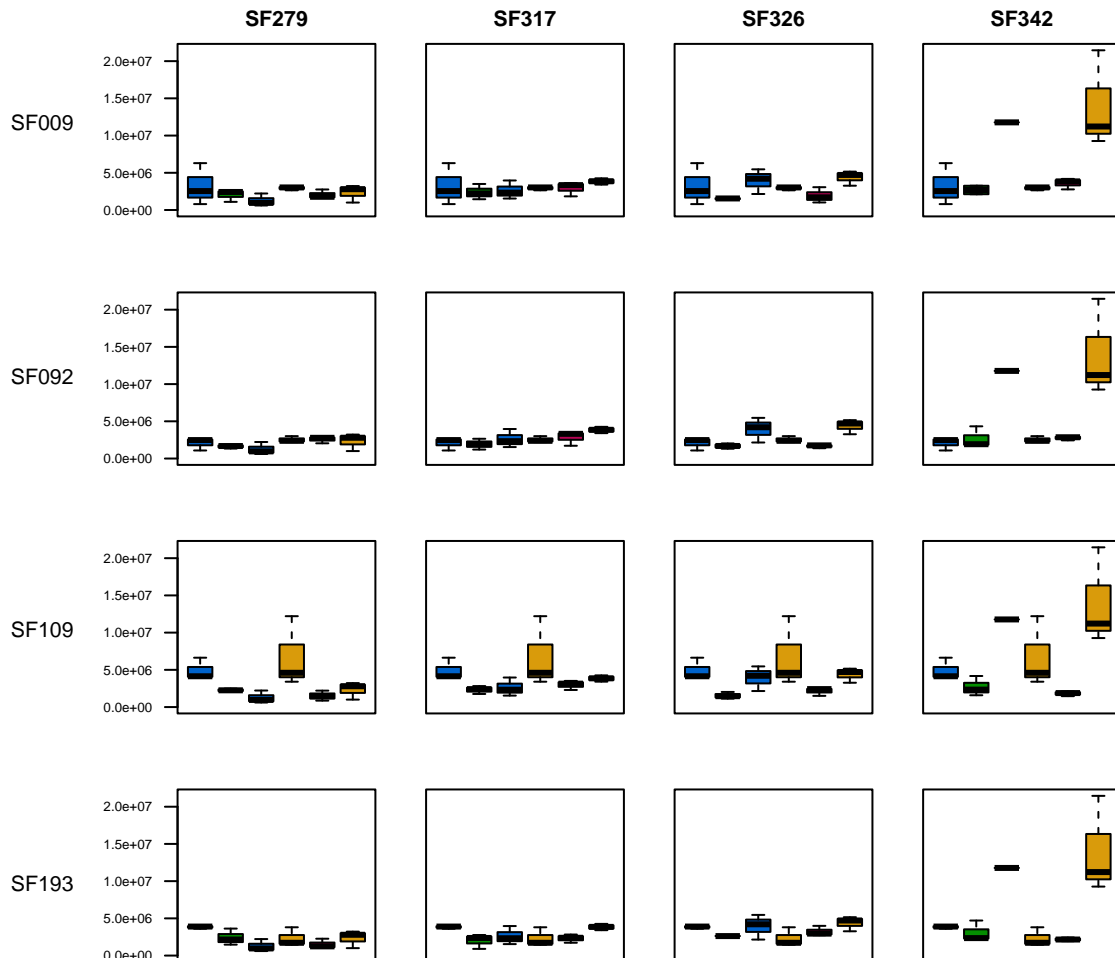

HanXRQChr11g0326341  
Probable cytochrome c

Parents WW  
Parents WD  
Hybrids WW  
Hybrids WD

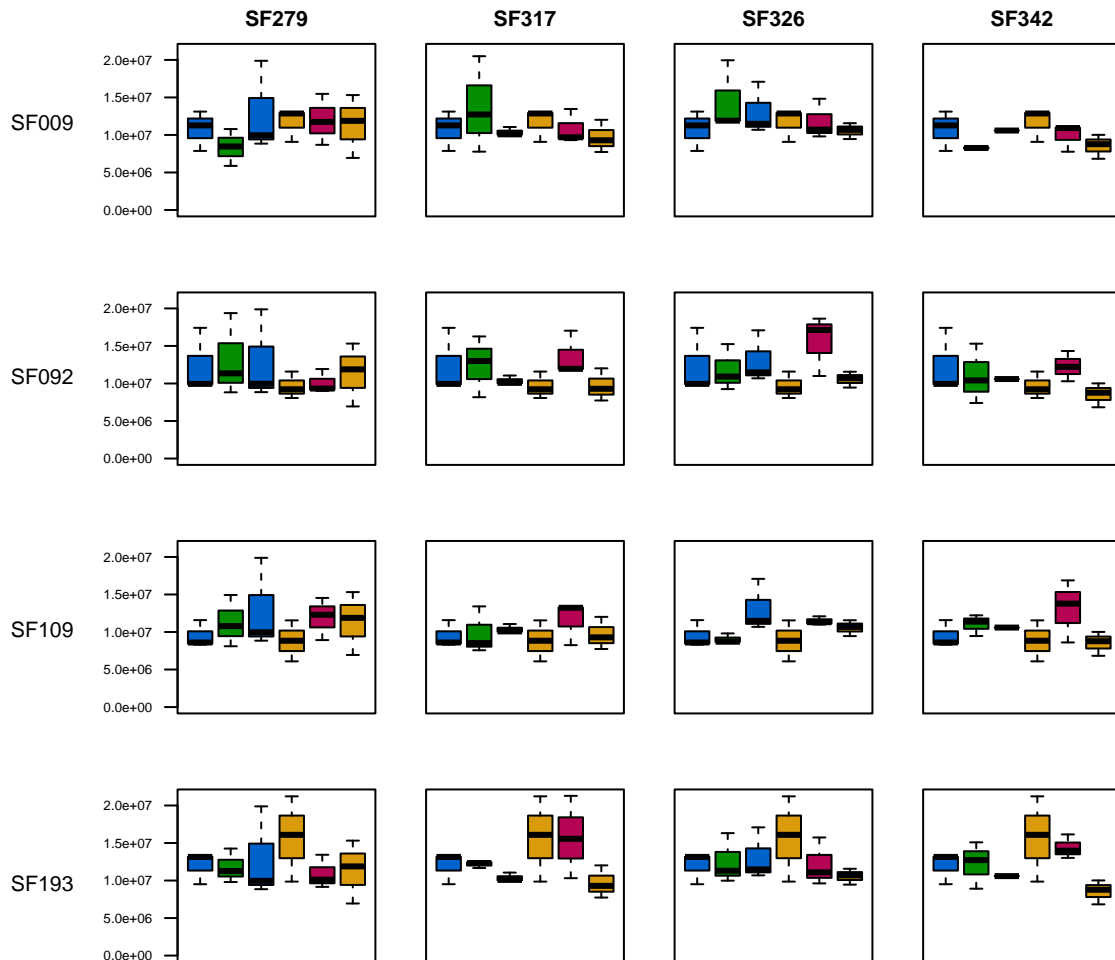

HanXRQChr11g0350821  
 Probable clathrin adaptor complexes  
 medium subunit family protein

Parents WW  
 Parents WD  
 Hybrids WW  
 Hybrids WD

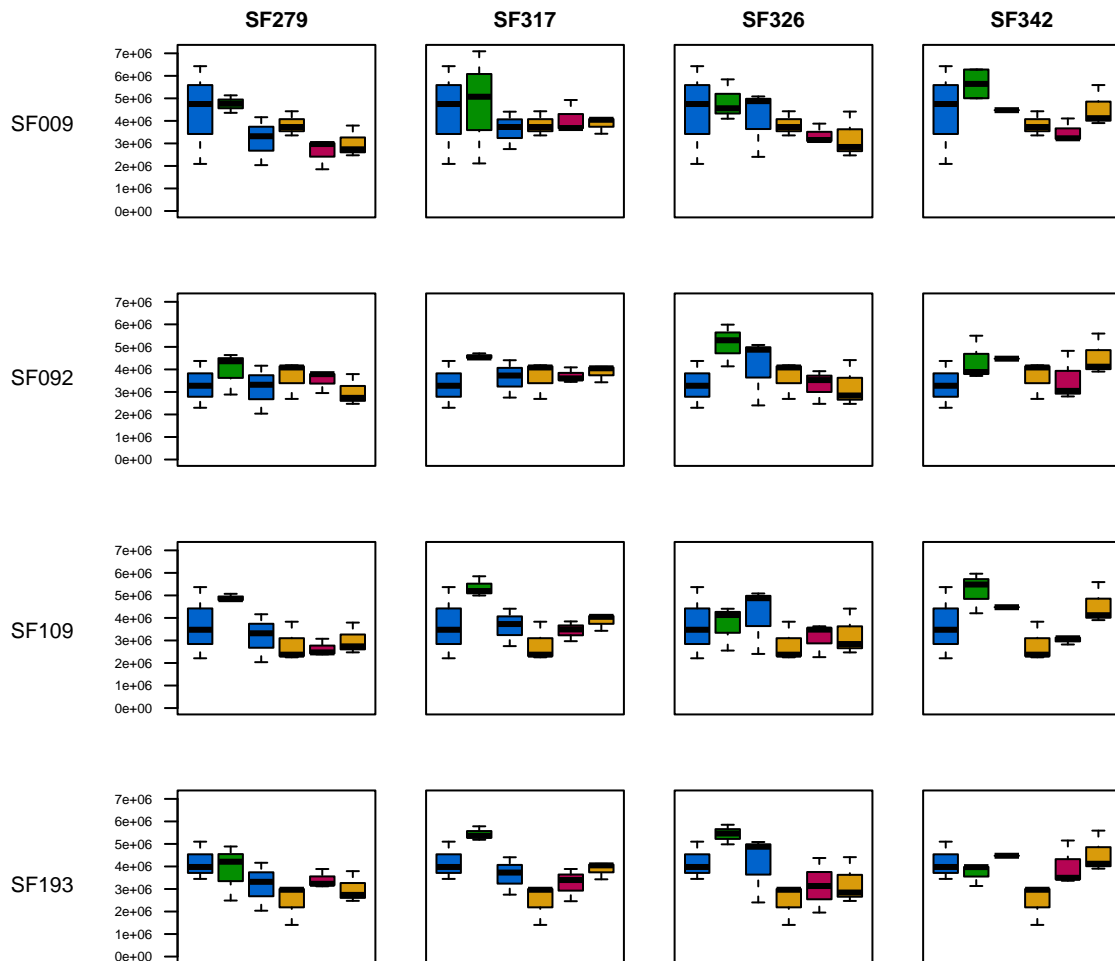



HanXRQChr16g0512721  
Uncharacterized protein, conserved in  
plant genome(s), supported by expression c

Parents WW  
Parents WD  
Hybrids WW  
Hybrids WD

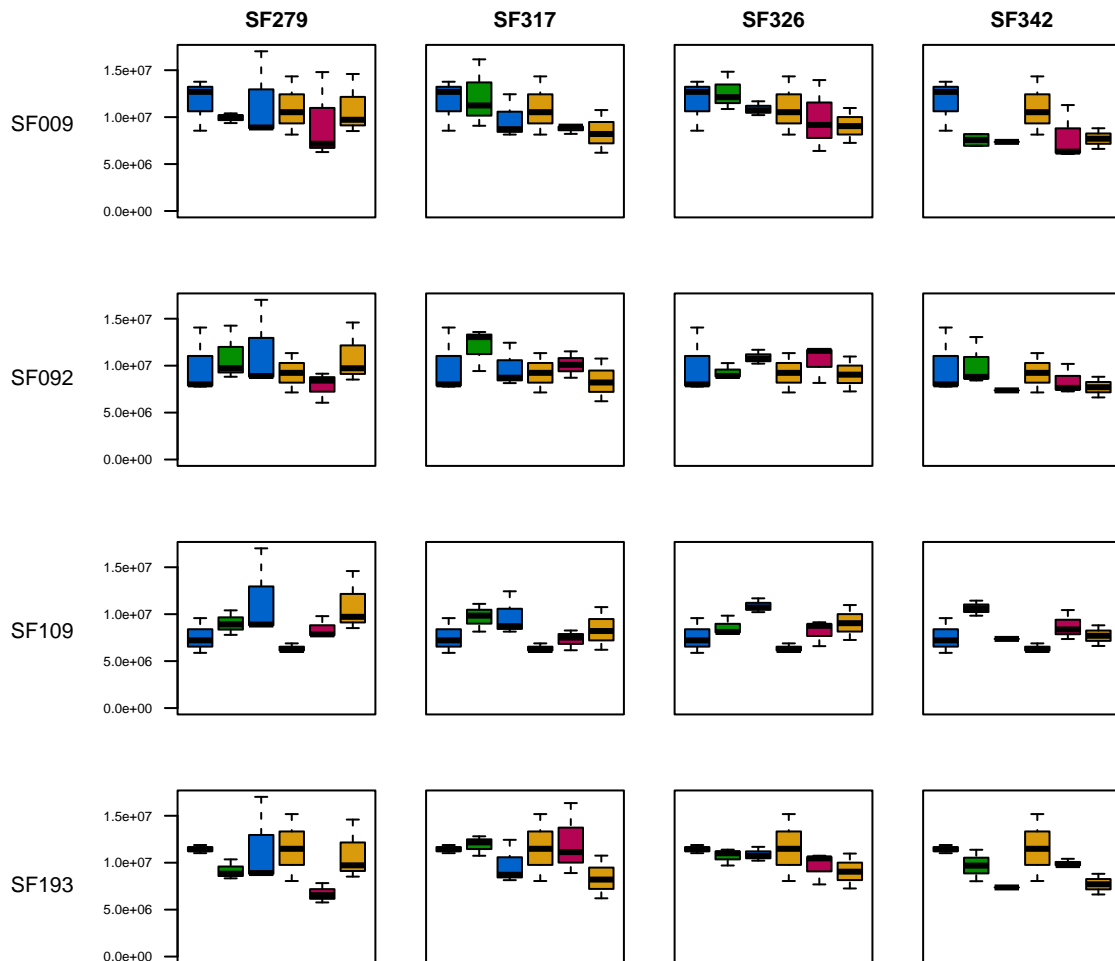

HanXRQChr04g0114711  
 Probable pectin lyase-like superfamily  
 protein

Parents WW  
 Parents WD  
 Hybrids WW  
 Hybrids WD

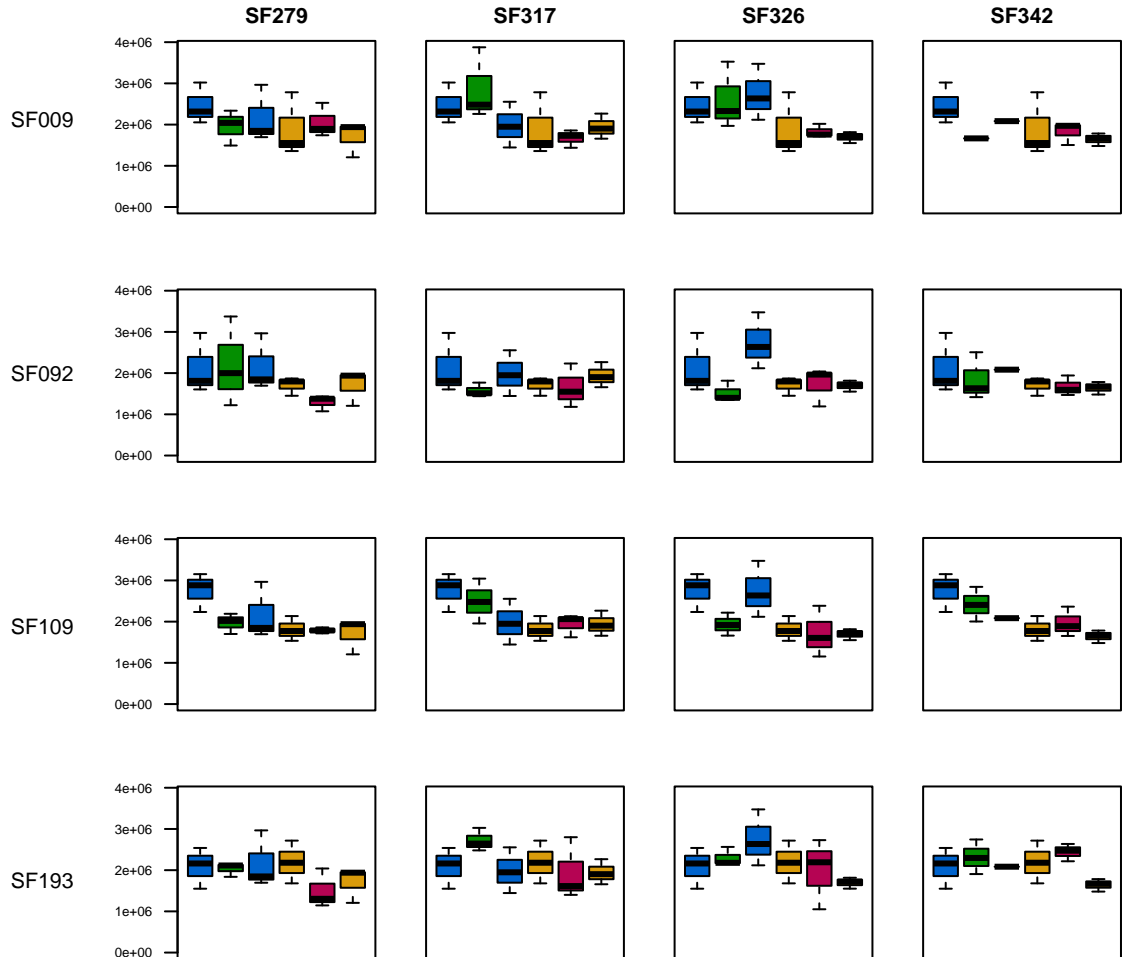

HanXRQChr09g0255221  
Probable sucrose/ferredoxin-like family  
protein

Parents WW  
Parents WD  
Hybrids WW  
Hybrids WD

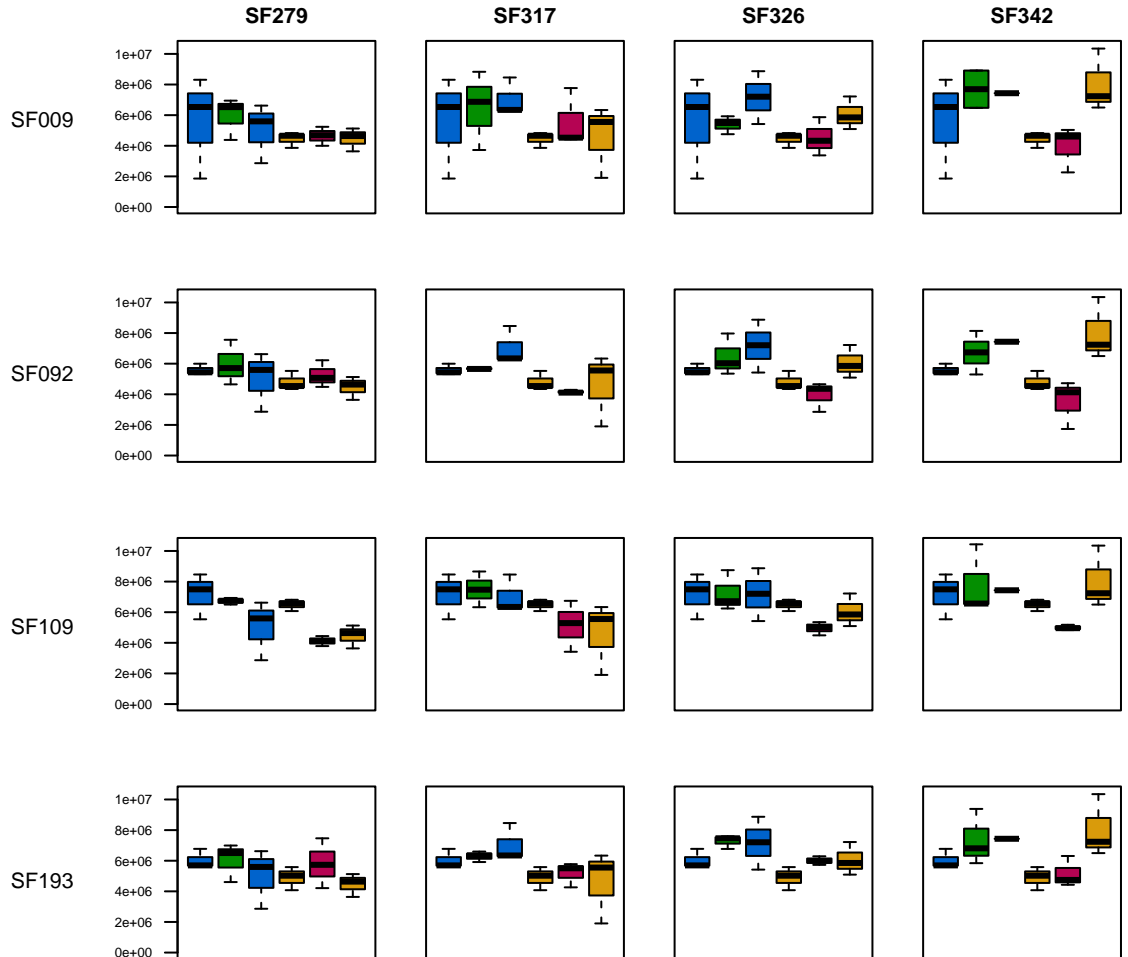

HanXRQChr03g0081271  
 Probable N-terminal nucleophile  
 aminohydrolases (Ntn hydrolases) superfan

Parents WW  
 Parents WD  
 Hybrids WW  
 Hybrids WD

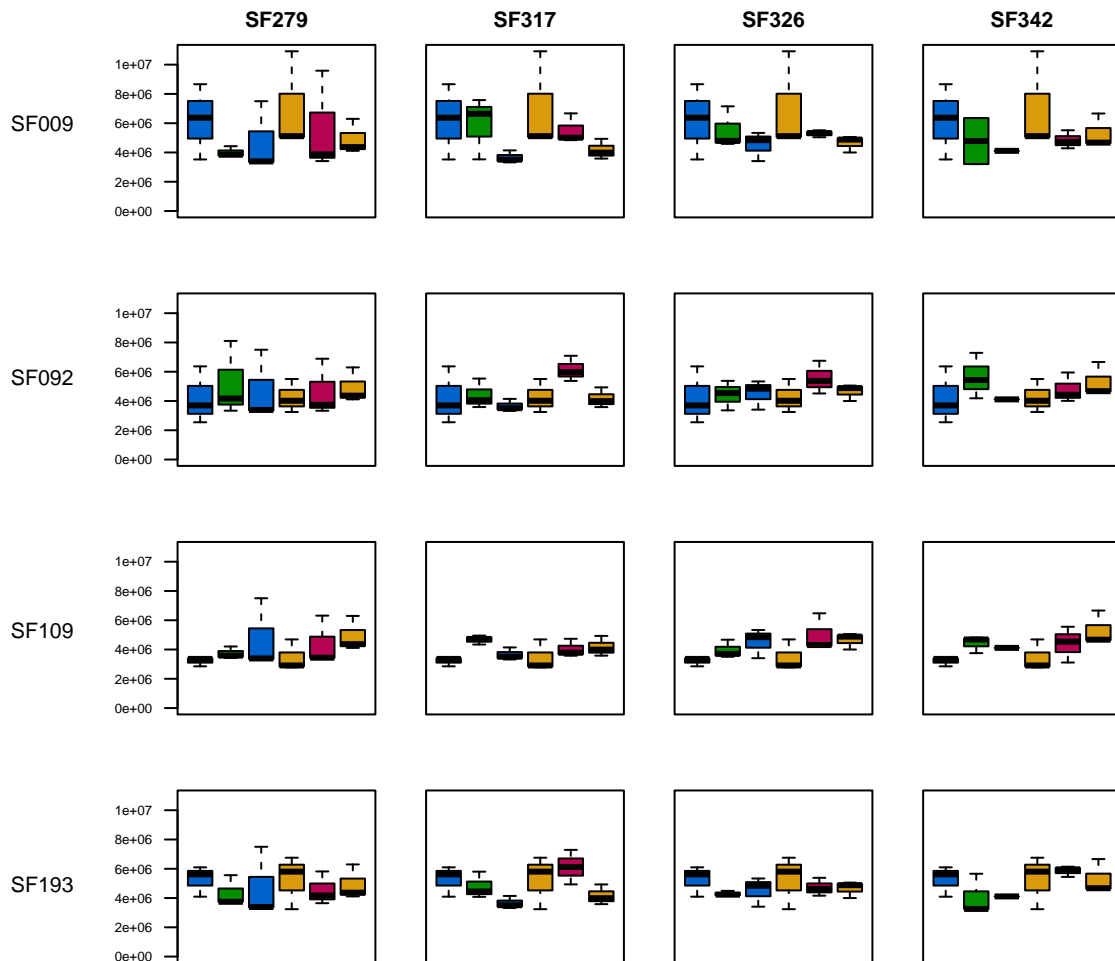

HanXRQChr17g0534801  
Uncharacterized conserved protein

Parents WW  
Parents WD  
Hybrids WW  
Hybrids WD

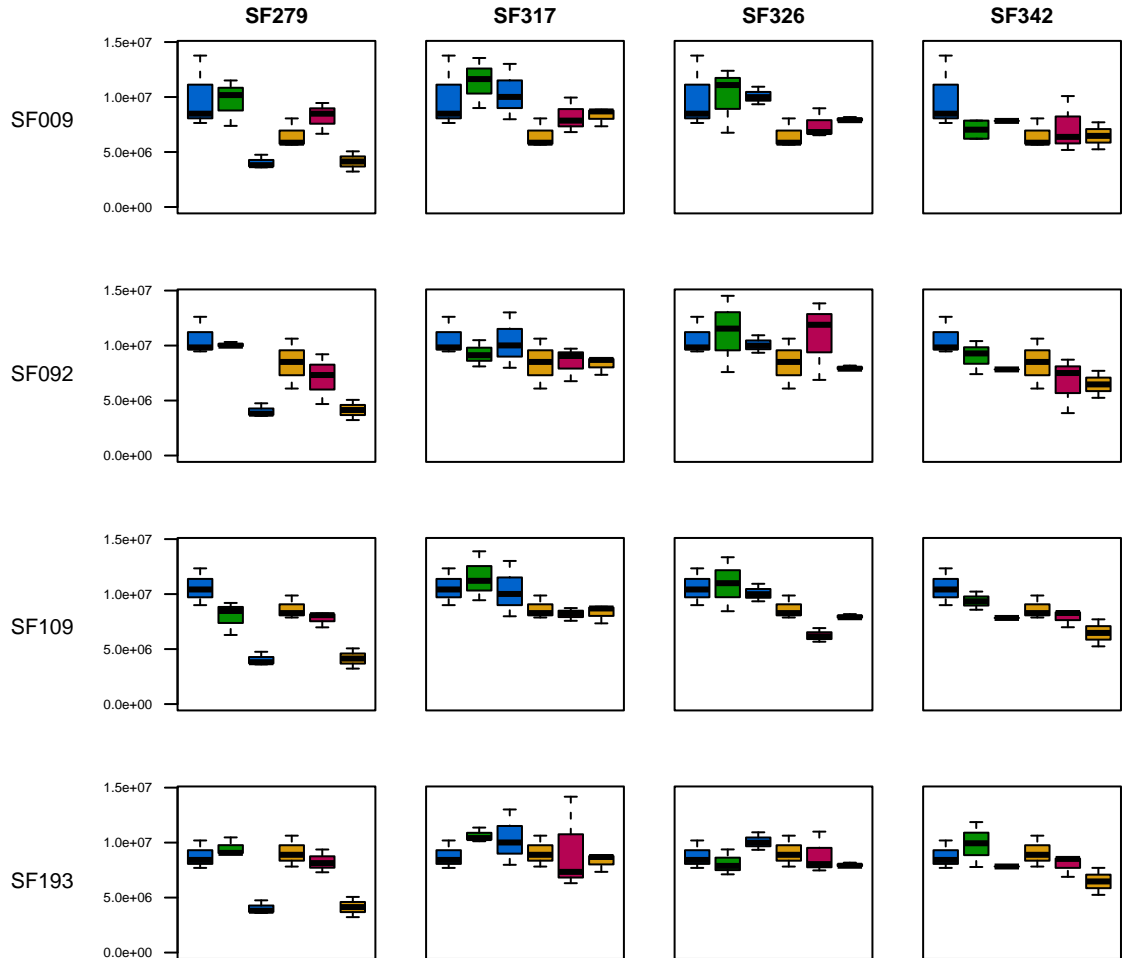

HanXRQChr10g0310141  
Probable DNAJ heat shock N-terminal  
domain-containing protein

Parents WW  
Parents WD  
Hybrids WW  
Hybrids WD

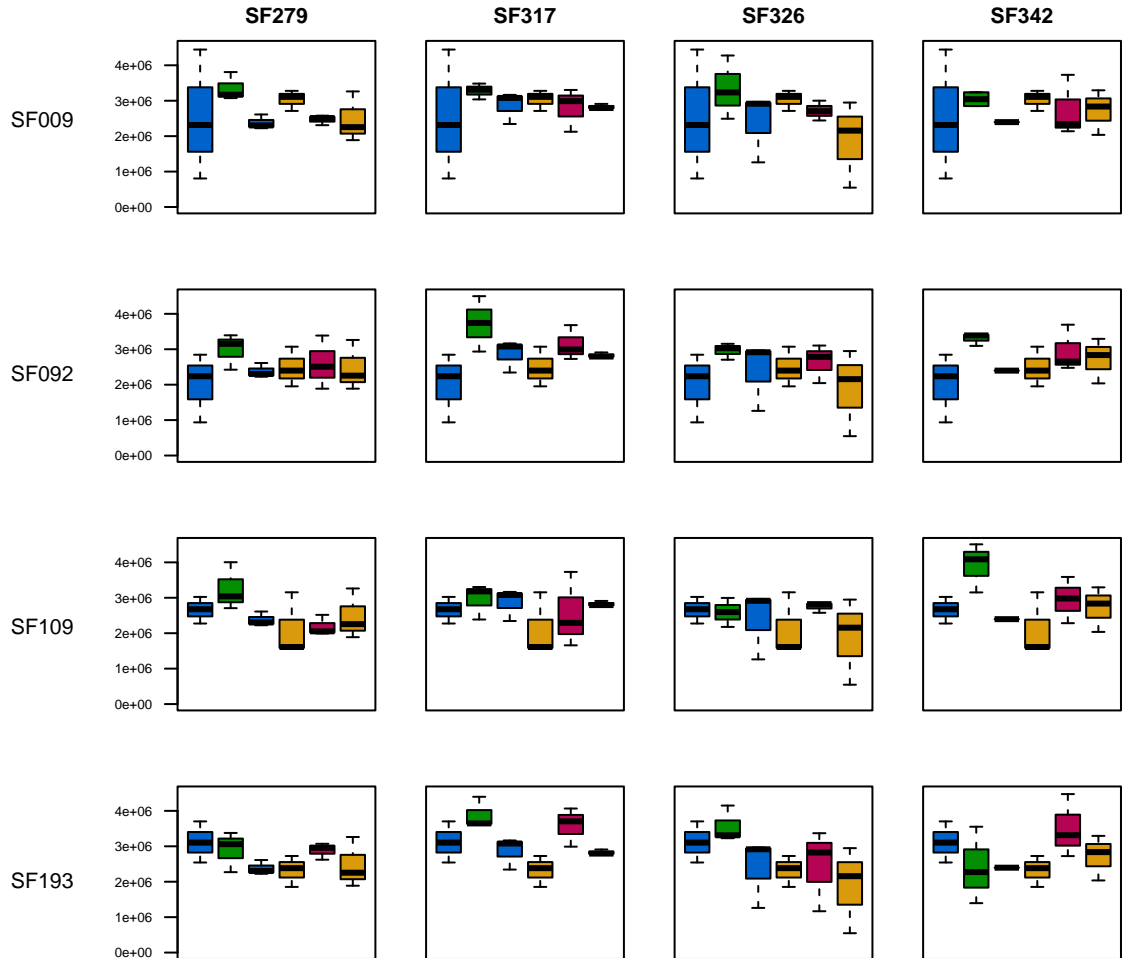

HanXRQChr07g0201901  
Uncharacterized conserved protein

- Parents WW
- Parents WD
- Hybrids WW
- Hybrids WD

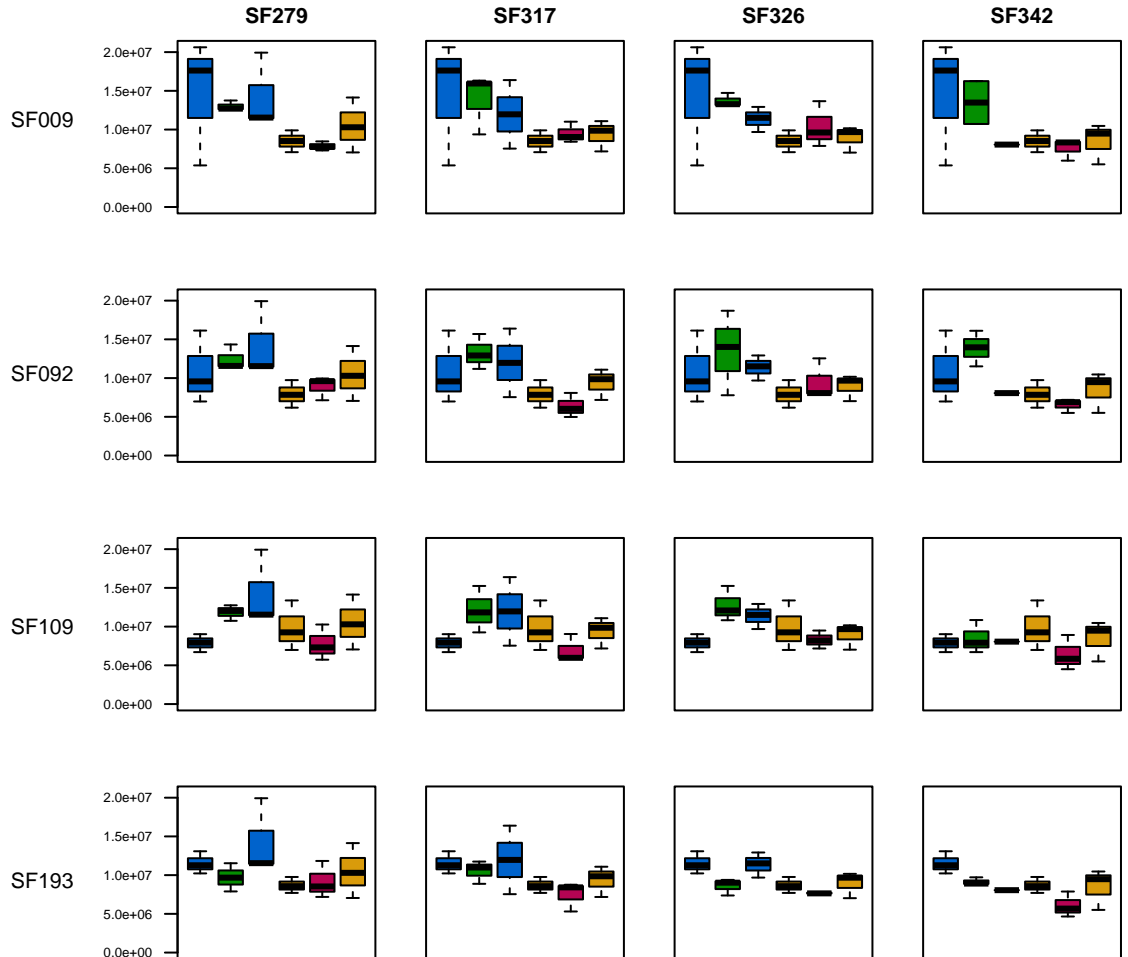

Supplement: s1 [file s1]
